# Supplementary material for: Solid State Structure and Hydrogen Bonding of Some Cyclic NH Carboximides
Source: MDPI journal article supplement (doi:10.3390/cryst13010150), 2023-01-15
Supplement: s1 [file s1]

Archive with 26 entries (26 files):
- 1.cif
- 10.cif
- 11.cif
- 12.cif
- 13.cif
- 2.cif
- 3.cif
- 4.cif
- 5.cif
- 6.cif
- 7.cif
- 8.cif
- 9.cif
- checkcif 1.pdf
- checkcif 10.pdf
- checkcif 11.pdf
- checkcif 12.pdf
- checkcif 13.pdf
- checkcif 2.pdf
- checkcif 3.pdf
- checkcif 4.pdf
- checkcif 5.pdf
- checkcif 6.pdf
- checkcif 7.pdf
- checkcif 8.pdf
- checkcif 9.pdf
