# Supplementary material for: Solid State Structure and Hydrogen Bonding of Some Cyclic NH Carboximides
Source: MDPI journal article supplement (doi:10.3390/cryst13010150), 2023-01-15
Supplement: s1 [file s1 › 1.cif]

data_1
_audit_creation_date                               2020-08-03
_audit_creation_method                            'by CrystalStructure 4.3'

_publ_section_references
;
    ENTER OTHER REFERENCES

    Rigaku (2018). CrystalStructure. Version 4.3. 
    Rigaku Corporation, Tokyo, Japan.

    Sheldrick, G. M. (2014). Acta Cryst. (2014). A70, C1437.
    SHELXT Version 2018/2

    Sheldrick, G.M. (2008) SHELXL Version 2018/3, Acta Cryst. A64, 112-122.

    Rigaku Oxford Diffraction (2015), CrysAlisPro. version 1.171.39.8d.
    Rigaku Corporation, Tokyo, Japan

;


_chemical_formula_sum                             'C8 H9 N O4 S'
_chemical_formula_moiety                          'C8 H9 N O4 S'
_chemical_formula_weight                           215.22
_chemical_melting_point                            ?

#==============================================================================
# CRYSTAL DATA
_space_group_crystal_system                        monoclinic
_space_group_name_H-M_alt                         'P 1 21/n 1'
_space_group_name_Hall                            '-P 2yn'
_space_group_IT_number                             14
loop_
_space_group_symop_id
_space_group_symop_operation_xyz
1   '+X,+Y,+Z'
2   '1/2-X,1/2+Y,1/2-Z'
3   '-X,-Y,-Z'
4   '-1/2+X,-1/2-Y,-1/2+Z'
#------------------------------------------------------------------------------
_cell_length_a                                     6.0139(3)
_cell_length_b                                     14.2212(6)
_cell_length_c                                     10.2142(5)
_cell_angle_alpha                                  90.0000
_cell_angle_beta                                   100.804(5)
_cell_angle_gamma                                  90.0000
_cell_volume                                       858.08(7)
_cell_formula_units_Z                              4
_cell_measurement_reflns_used                      6399
_cell_measurement_theta_min                        2.48
_cell_measurement_theta_max                        28.06
_cell_measurement_temperature                      93
#------------------------------------------------------------------------------
_exptl_crystal_description                         prism
_exptl_crystal_colour                              colourless
_exptl_crystal_size_max                            0.100
_exptl_crystal_size_mid                            0.100
_exptl_crystal_size_min                            0.020
_exptl_crystal_density_diffrn                      1.666
_exptl_crystal_density_meas                        ?
_exptl_crystal_density_method                     'not measured'
_exptl_crystal_F_000                               448.00
_exptl_absorpt_coefficient_mu                      0.363
_exptl_absorpt_correction_type                     multi-scan
_exptl_absorpt_process_details
;
CrysAlisPro 1.171.39.8d (Rigaku Oxford Diffraction, 2015)
Empirical absorption correction using spherical harmonics,
 implemented in SCALE3 ABSPACK scaling algorithm.
;
_exptl_absorpt_correction_T_min                    0.609
_exptl_absorpt_correction_T_max                    0.993

#==============================================================================
# EXPERIMENTAL DATA

_diffrn_ambient_temperature                        93
_diffrn_radiation_type                            'Mo K\a'
_diffrn_radiation_wavelength                       0.71073
_diffrn_measurement_device_type                   'Rigaku XtaLAB P200'
_diffrn_measurement_method                         \w
_diffrn_detector_area_resol_mean                   5.811
_diffrn_reflns_number                              12460
_diffrn_reflns_av_unetI/netI                       0.0368
_diffrn_reflns_av_R_equivalents                    0.0799
_diffrn_reflns_theta_max                           28.235
_diffrn_reflns_theta_min                           2.484
_diffrn_reflns_theta_full                          25.242
_diffrn_measured_fraction_theta_max                0.899
_diffrn_measured_fraction_theta_full               1.000
_diffrn_reflns_Laue_measured_fraction_max          0.899
_diffrn_reflns_Laue_measured_fraction_full         1.000
_diffrn_reflns_point_group_measured_fraction_max   0.899
_diffrn_reflns_point_group_measured_fraction_full  1.000
_diffrn_reflns_limit_h_min                        -7
_diffrn_reflns_limit_h_max                         7
_diffrn_reflns_limit_k_min                        -18
_diffrn_reflns_limit_k_max                         18
_diffrn_reflns_limit_l_min                        -12
_diffrn_reflns_limit_l_max                         13
_diffrn_standards_number                           0
_diffrn_standards_interval_count                   .
_diffrn_standards_decay_%                          ?
_reflns_number_total                               1899
_reflns_number_gt                                  1659
_reflns_threshold_expression                       F^2^>2.0\s(F^2^)
_reflns_Friedel_coverage          0.000
_reflns_Friedel_fraction_max      .
_reflns_Friedel_fraction_full     .

#==============================================================================
# REFINEMENT DATA

_refine_special_details
;
    Refinement was performed using all reflections. The weighted 
    R-factor (wR) and goodness of fit (S) are based on F^2^.
    R-factor (gt) are based on F. The threshold expression of
    F^2^ > 2.0 sigma(F^2^) is used only for calculating R-factor (gt).
;
_refine_ls_structure_factor_coef                   Fsqd
_refine_ls_R_factor_all                            0.0552
_refine_ls_R_factor_gt                             0.0505
_refine_ls_wR_factor_ref                           0.1584
_refine_ls_wR_factor_gt                            0.1563
_refine_ls_number_restraints                       1
_refine_ls_hydrogen_treatment                      mixed
_refine_ls_number_reflns                           1899
_refine_ls_number_parameters                       131
_refine_ls_goodness_of_fit_ref                     1.175
_refine_ls_weighting_scheme                        calc
_refine_ls_weighting_details
                   'w = 1/[\s^2^(Fo^2^)+(0.1125P)^2^] where P=(Fo^2^+2Fc^2^)/3'
_atom_sites_solution_hydrogens                     geom
_atom_sites_solution_primary                       direct
_atom_sites_solution_secondary                     difmap
_refine_ls_shift/su_max                            0.001
_refine_diff_density_max                           0.77
_refine_diff_density_min                          -0.55
_refine_ls_extinction_method                       none
_refine_ls_extinction_coef                         ?

loop_
_atom_type_symbol
_atom_type_description
_atom_type_scat_dispersion_real
_atom_type_scat_dispersion_imag
_atom_type_scat_source
  'C' 'C'  0.0033 0.0016 
;
International Tables for Crystallography
(Vol. C, Tables 4.2.6.8 and 6.1.1.4)
;
  'H' 'H'  0.0000 0.0000 
;
International Tables for Crystallography
(Vol. C, Table 6.1.1.4)
;
  'S' 'S'  0.1246 0.1234 
;
International Tables for Crystallography
(Vol. C, Tables 4.2.6.8 and 6.1.1.4)
;
  'O' 'O'  0.0106 0.0060 
;
International Tables for Crystallography
(Vol. C, Tables 4.2.6.8 and 6.1.1.4)
;
  'N' 'N'  0.0061 0.0033 
;
International Tables for Crystallography
(Vol. C, Tables 4.2.6.8 and 6.1.1.4)
;

#==============================================================================
# ATOMIC COORDINATES AND THERMAL PARAMETERS

loop_
 _atom_site_label
 _atom_site_type_symbol
 _atom_site_fract_x
 _atom_site_fract_y
 _atom_site_fract_z
 _atom_site_U_iso_or_equiv
 _atom_site_adp_type
 _atom_site_occupancy
 _atom_site_site_symmetry_order  
 _atom_site_calc_flag
 _atom_site_refinement_flags_posn
 _atom_site_refinement_flags_adp
 _atom_site_refinement_flags_occupancy
 _atom_site_disorder_assembly
 _atom_site_disorder_group
S1 S 0.48628(8) 0.67511(3) 0.49525(4) 0.0201(2) Uani 1 1 d . . . . .
O1 O 0.6509(2) 0.60002(10) 0.52125(14) 0.0297(4) Uani 1 1 d . . . . .
O2 O 0.4806(2) 0.73156(11) 0.37691(13) 0.0307(4) Uani 1 1 d . . . . .
O5 O -0.0171(2) 0.47434(10) 0.81928(13) 0.0234(4) Uani 1 1 d . . . . .
O7 O 0.5349(2) 0.66041(10) 1.05066(13) 0.0254(4) Uani 1 1 d . . . . .
N6 N 0.2474(3) 0.56092(11) 0.95960(14) 0.0193(4) Uani 1 1 d D . . . .
C2 C 0.2138(3) 0.62884(13) 0.50249(17) 0.0197(4) Uani 1 1 d . . . . .
H2A H 0.094152 0.667032 0.447104 0.024 Uiso 1 1 calc R U . . .
H2B H 0.200673 0.563229 0.469564 0.024 Uiso 1 1 calc R U . . .
C3 C 0.1905(3) 0.63265(12) 0.64910(17) 0.0182(4) Uani 1 1 d . . . . .
H3 H 0.032887 0.647544 0.660856 0.022 Uiso 1 1 calc R U . . .
C4 C 0.2972(3) 0.54904(13) 0.73802(17) 0.0195(4) Uani 1 1 d . . . . .
H4 H 0.354715 0.495822 0.689692 0.023 Uiso 1 1 calc R U . . .
C5 C 0.1539(3) 0.52131(14) 0.83884(18) 0.0203(4) Uani 1 1 d . . . . .
C7 C 0.4341(3) 0.61761(13) 0.95562(18) 0.0202(4) Uani 1 1 d . . . . .
C8 C 0.4794(3) 0.61481(13) 0.81469(17) 0.0193(4) Uani 1 1 d . . . . .
H8 H 0.638690 0.599500 0.806805 0.023 Uiso 1 1 calc R U . . .
C9 C 0.3721(3) 0.70049(13) 0.73016(17) 0.0186(4) Uani 1 1 d . . . . .
H9 H 0.303927 0.747164 0.784315 0.022 Uiso 1 1 calc R U . . .
C10 C 0.5138(3) 0.74713(12) 0.63932(17) 0.0184(4) Uani 1 1 d . . . . .
H10A H 0.674307 0.751219 0.684342 0.022 Uiso 1 1 calc R U . . .
H10B H 0.457470 0.811388 0.615005 0.022 Uiso 1 1 calc R U . . .
H6 H 0.182(4) 0.554(2) 1.0395(16) 0.047(7) Uiso 1 1 d D . . . .

loop_
 _atom_site_aniso_label
 _atom_site_aniso_U_11
 _atom_site_aniso_U_22
 _atom_site_aniso_U_33
 _atom_site_aniso_U_23
 _atom_site_aniso_U_13
 _atom_site_aniso_U_12
S1 0.0190(4) 0.0246(4) 0.0157(3) -0.00267(16) 0.0011(2) -0.00077(16)
O1 0.0222(8) 0.0302(8) 0.0345(8) -0.0109(6) -0.0004(6) 0.0041(6)
O2 0.0299(9) 0.0449(9) 0.0174(7) 0.0037(6) 0.0046(6) -0.0103(7)
O5 0.0249(8) 0.0242(7) 0.0199(7) -0.0002(6) 0.0009(6) -0.0056(6)
O7 0.0265(8) 0.0309(8) 0.0168(7) -0.0018(6) -0.0017(6) -0.0078(6)
N6 0.0209(8) 0.0202(8) 0.0162(8) 0.0008(6) 0.0021(6) -0.0019(6)
C2 0.0182(9) 0.0239(9) 0.0152(8) -0.0004(7) -0.0017(7) -0.0019(7)
C3 0.0165(9) 0.0197(9) 0.0172(9) 0.0013(7) 0.0002(7) 0.0014(7)
C4 0.0215(9) 0.0179(9) 0.0186(9) 0.0010(7) 0.0024(7) 0.0017(7)
C5 0.0239(10) 0.0174(8) 0.0183(9) 0.0017(7) 0.0008(8) 0.0028(7)
C7 0.0209(9) 0.0205(9) 0.0183(9) 0.0025(7) 0.0010(7) 0.0009(7)
C8 0.0187(10) 0.0213(9) 0.0165(9) 0.0007(7) -0.0005(7) -0.0008(7)
C9 0.0194(10) 0.0192(9) 0.0170(9) 0.0002(7) 0.0026(7) 0.0004(7)
C10 0.0208(10) 0.0177(8) 0.0152(8) -0.0007(7) -0.0001(7) -0.0014(7)

#==============================================================================
_computing_data_collection
                                    'CrysAlisPro 1.171.39.8d (Rigaku OD, 2015)'
_computing_cell_refinement
                                    'CrysAlisPro 1.171.39.8d (Rigaku OD, 2015)'
_computing_data_reduction
                                    'CrysAlisPro 1.171.39.8d (Rigaku OD, 2015)'
_computing_structure_solution
                                      'SHELXT Version 2018/2 (Sheldrick, 2014)'
_computing_structure_refinement
                                      'SHELXL Version 2018/3 (Sheldrick, 2008)'
_computing_publication_material
                                          'CrystalStructure 4.3 (Rigaku, 2018)'
_computing_molecular_graphics                     'CrystalStructure 4.3'

#==============================================================================
# MOLECULAR GEOMETRY

_geom_special_details
;
 All esds (except the esd in the dihedral angle between two l.s. planes)
 are estimated using the full covariance matrix.  The cell esds are taken
 into account individually in the estimation of esds in distances, angles
 and torsion angles; correlations between esds in cell parameters are only
 used when they are defined by crystal symmetry.  An approximate (isotropic)
 treatment of cell esds is used for estimating esds involving l.s. planes.
;

loop_
 _geom_bond_atom_site_label_1
 _geom_bond_atom_site_label_2
 _geom_bond_distance
 _geom_bond_site_symmetry_2
 _geom_bond_publ_flag
S1 O1 1.4464(14) . ?
S1 O2 1.4461(14) . ?
S1 C10 1.7750(18) . ?
S1 C2 1.7803(18) . ?
O5 C5 1.211(2) . ?
O7 C7 1.208(2) . ?
N6 C5 1.377(2) . ?
N6 C7 1.389(2) . ?
N6 H6 0.975(5) . ?
C2 C3 1.531(2) . ?
C2 H2A 0.9900 . ?
C2 H2B 0.9900 . ?
C3 C4 1.560(2) . ?
C3 C9 1.572(2) . ?
C3 H3 1.0000 . ?
C4 C5 1.514(3) . ?
C4 C8 1.539(3) . ?
C4 H4 1.0000 . ?
C7 C8 1.515(2) . ?
C8 C9 1.561(2) . ?
C8 H8 1.0000 . ?
C9 C10 1.524(2) . ?
C9 H9 1.0000 . ?
C10 H10A 0.9900 . ?
C10 H10B 0.9900 . ?

loop_
 _geom_angle_atom_site_label_1
 _geom_angle_atom_site_label_2
 _geom_angle_atom_site_label_3
 _geom_angle
 _geom_angle_site_symmetry_1
 _geom_angle_site_symmetry_3
 _geom_angle_publ_flag
O1 S1 O2 118.13(8) . . ?
O1 S1 C10 108.63(8) . . ?
O2 S1 C10 110.89(9) . . ?
O1 S1 C2 108.85(9) . . ?
O2 S1 C2 111.24(8) . . ?
C10 S1 C2 97.02(9) . . ?
C5 N6 C7 114.08(15) . . ?
C5 N6 H6 123.3(16) . . ?
C7 N6 H6 122.4(16) . . ?
C3 C2 S1 106.35(12) . . ?
C3 C2 H2A 110.5 . . ?
S1 C2 H2A 110.5 . . ?
C3 C2 H2B 110.5 . . ?
S1 C2 H2B 110.5 . . ?
H2A C2 H2B 108.7 . . ?
C2 C3 C4 116.07(15) . . ?
C2 C3 C9 110.78(14) . . ?
C4 C3 C9 89.51(13) . . ?
C2 C3 H3 112.8 . . ?
C4 C3 H3 112.8 . . ?
C9 C3 H3 112.8 . . ?
C5 C4 C8 104.73(15) . . ?
C5 C4 C3 111.71(15) . . ?
C8 C4 C3 90.53(13) . . ?
C5 C4 H4 115.6 . . ?
C8 C4 H4 115.6 . . ?
C3 C4 H4 115.6 . . ?
O5 C5 N6 124.42(17) . . ?
O5 C5 C4 127.27(17) . . ?
N6 C5 C4 108.28(16) . . ?
O7 C7 N6 123.76(17) . . ?
O7 C7 C8 128.60(18) . . ?
N6 C7 C8 107.65(15) . . ?
C7 C8 C4 105.17(15) . . ?
C7 C8 C9 112.06(15) . . ?
C4 C8 C9 90.68(13) . . ?
C7 C8 H8 115.3 . . ?
C4 C8 H8 115.3 . . ?
C9 C8 H8 115.3 . . ?
C10 C9 C8 117.13(15) . . ?
C10 C9 C3 111.04(14) . . ?
C8 C9 C3 89.24(13) . . ?
C10 C9 H9 112.5 . . ?
C8 C9 H9 112.5 . . ?
C3 C9 H9 112.5 . . ?
C9 C10 S1 106.12(12) . . ?
C9 C10 H10A 110.5 . . ?
S1 C10 H10A 110.5 . . ?
C9 C10 H10B 110.5 . . ?
S1 C10 H10B 110.5 . . ?
H10A C10 H10B 108.7 . . ?

loop_
 _geom_torsion_atom_site_label_1
 _geom_torsion_atom_site_label_2
 _geom_torsion_atom_site_label_3
 _geom_torsion_atom_site_label_4
 _geom_torsion
 _geom_torsion_site_symmetry_1
 _geom_torsion_site_symmetry_2
 _geom_torsion_site_symmetry_3
 _geom_torsion_site_symmetry_4
 _geom_torsion_publ_flag
O1 S1 C2 C3 86.25(13) . . . . ?
O2 S1 C2 C3 -141.90(12) . . . . ?
C10 S1 C2 C3 -26.22(13) . . . . ?
S1 C2 C3 C4 -83.38(16) . . . . ?
S1 C2 C3 C9 16.74(17) . . . . ?
C2 C3 C4 C5 -142.47(16) . . . . ?
C9 C3 C4 C5 104.53(16) . . . . ?
C2 C3 C4 C8 111.43(16) . . . . ?
C9 C3 C4 C8 -1.57(13) . . . . ?
C7 N6 C5 O5 -175.44(18) . . . . ?
C7 N6 C5 C4 3.1(2) . . . . ?
C8 C4 C5 O5 175.40(19) . . . . ?
C3 C4 C5 O5 78.8(2) . . . . ?
C8 C4 C5 N6 -3.1(2) . . . . ?
C3 C4 C5 N6 -99.67(18) . . . . ?
C5 N6 C7 O7 177.88(18) . . . . ?
C5 N6 C7 C8 -1.7(2) . . . . ?
O7 C7 C8 C4 -179.93(19) . . . . ?
N6 C7 C8 C4 -0.4(2) . . . . ?
O7 C7 C8 C9 -82.9(2) . . . . ?
N6 C7 C8 C9 96.68(17) . . . . ?
C5 C4 C8 C7 2.04(19) . . . . ?
C3 C4 C8 C7 114.68(15) . . . . ?
C5 C4 C8 C9 -111.05(15) . . . . ?
C3 C4 C8 C9 1.58(14) . . . . ?
C7 C8 C9 C10 138.37(16) . . . . ?
C4 C8 C9 C10 -114.95(16) . . . . ?
C7 C8 C9 C3 -108.25(16) . . . . ?
C4 C8 C9 C3 -1.57(13) . . . . ?
C2 C3 C9 C10 2.6(2) . . . . ?
C4 C3 C9 C10 120.47(15) . . . . ?
C2 C3 C9 C8 -116.28(15) . . . . ?
C4 C3 C9 C8 1.55(13) . . . . ?
C8 C9 C10 S1 79.64(17) . . . . ?
C3 C9 C10 S1 -20.80(17) . . . . ?
O1 S1 C10 C9 -84.93(14) . . . . ?
O2 S1 C10 C9 143.68(13) . . . . ?
C2 S1 C10 C9 27.72(14) . . . . ?

loop_
_geom_hbond_atom_site_label_D
_geom_hbond_atom_site_label_H
_geom_hbond_atom_site_label_A
_geom_hbond_site_symmetry_D
_geom_hbond_site_symmetry_H
_geom_hbond_site_symmetry_A
_geom_hbond_distance_DA
_geom_hbond_distance_DH
_geom_hbond_distance_HA
_geom_hbond_angle_DHA
_geom_hbond_publ_flag
N6 H6 O5 . . 3_567 2.906(2) 0.97(2) 1.94(2) 170(2) no

#==============================================================================
# Additional structures and associated data_? identifiers
# should be added at this point if there is more than one 
# structure analysis in the CIF.

_shelx_res_file
;
TITL dsaa9
    shelxl.res
    created by SHELXL-2018/3 at 15:53:21 on 03-Aug-2020
CELL  0.71073 6.01390 14.22120 10.21420 90.00000 100.80400 90.00000
ZERR  4 0.00030 0.00060 0.00050 0.00000 0.00500 0.00000
LATT 1
SYMM .50-X, .50+Y, .50-Z
SFAC C H S O N
UNIT 32 36 4 16 4
L.S. 20
FMAP 2
PLAN 5
WPDB -2
HTAB
BOND $H
CONF
LIST 4
TEMP -180.0
ACTA
SIZE 0.100 0.100 0.020
DFIX 0.9800 0.0050 N6 H6
WGHT    0.112500
FVAR       0.68330
S1    3    0.486284    0.675107    0.495247    11.00000    0.01900    0.02458 =
         0.01574   -0.00267    0.00112   -0.00077
O1    4    0.650887    0.600018    0.521247    11.00000    0.02222    0.03022 =
         0.03449   -0.01094   -0.00037    0.00413
O2    4    0.480621    0.731559    0.376914    11.00000    0.02991    0.04491 =
         0.01743    0.00366    0.00462   -0.01030
O5    4   -0.017060    0.474335    0.819278    11.00000    0.02490    0.02418 =
         0.01986   -0.00023    0.00091   -0.00564
O7    4    0.534908    0.660414    1.050663    11.00000    0.02648    0.03085 =
         0.01677   -0.00177   -0.00167   -0.00783
N6    5    0.247383    0.560924    0.959598    11.00000    0.02092    0.02019 =
         0.01616    0.00085    0.00206   -0.00188
C2    1    0.213792    0.628843    0.502494    11.00000    0.01821    0.02391 =
         0.01521   -0.00036   -0.00167   -0.00185
AFIX  23
H2A   2    0.094152    0.667032    0.447104    11.00000   -1.20000
H2B   2    0.200673    0.563229    0.469564    11.00000   -1.20000
AFIX   0
C3    1    0.190466    0.632649    0.649103    11.00000    0.01652    0.01969 =
         0.01717    0.00132    0.00020    0.00141
AFIX  13
H3    2    0.032887    0.647544    0.660856    11.00000   -1.20000
AFIX   0
C4    1    0.297231    0.549043    0.738021    11.00000    0.02147    0.01791 =
         0.01860    0.00099    0.00235    0.00174
AFIX  13
H4    2    0.354715    0.495822    0.689692    11.00000   -1.20000
AFIX   0
C5    1    0.153862    0.521309    0.838838    11.00000    0.02394    0.01740 =
         0.01827    0.00171    0.00079    0.00280
C7    1    0.434052    0.617608    0.955618    11.00000    0.02086    0.02053 =
         0.01833    0.00253    0.00104    0.00094
C8    1    0.479443    0.614809    0.814694    11.00000    0.01873    0.02129 =
         0.01646    0.00073   -0.00050   -0.00081
AFIX  13
H8    2    0.638690    0.599500    0.806805    11.00000   -1.20000
AFIX   0
C9    1    0.372149    0.700488    0.730160    11.00000    0.01941    0.01917 =
         0.01697    0.00021    0.00255    0.00041
AFIX  13
H9    2    0.303927    0.747164    0.784315    11.00000   -1.20000
AFIX   0
C10   1    0.513810    0.747126    0.639318    11.00000    0.02084    0.01774 =
         0.01518   -0.00069   -0.00008   -0.00145
AFIX  23
H10A  2    0.674307    0.751219    0.684342    11.00000   -1.20000
H10B  2    0.457470    0.811388    0.615005    11.00000   -1.20000
AFIX   0
H6    2    0.182079    0.554187    1.039502    11.00000    0.04708
HKLF 4


REM  dsaa9
REM wR2 = 0.1584, GooF = S = 1.175, Restrained GooF = 1.175 for all data
REM R1 = 0.0505 for 1659 Fo > 4sig(Fo) and 0.0552 for all 1899 data
REM 131 parameters refined using 1 restraints

END

WGHT      0.1084      0.0272

REM Instructions for potential hydrogen bonds
EQIV $1 -x+1, -y+1, -z+1
HTAB C2 O1_$1
EQIV $2 x-1, y, z
HTAB C3 O1_$2
HTAB C4 O1_$1
EQIV $3 x-1/2, -y+3/2, z+1/2
HTAB C9 O2_$3
EQIV $4 x+1/2, -y+3/2, z+1/2
HTAB C10 O2_$4
EQIV $5 -x+1/2, y+1/2, -z+3/2
HTAB C10 O5_$5
EQIV $6 x-1/2, -y+3/2, z-1/2
HTAB C10 O7_$6
EQIV $7 -x, -y+1, -z+2
HTAB N6 O5_$7

REM Highest difference peak  0.775,  deepest hole -0.549,  1-sigma level  0.094
Q1    1   0.3525  0.6624  0.5101  11.00000  0.05    0.77
Q2    1   0.4998  0.7144  0.5616  11.00000  0.05    0.58
Q3    1   0.4944  0.7106  0.4397  11.00000  0.05    0.55
Q4    1   0.2247  0.5363  0.7950  11.00000  0.05    0.49
Q5    1   0.6402  0.6543  0.4719  11.00000  0.05    0.47
;

_shelx_res_checksum    1408

_shelx_hkl_file
;
   0   0   1    0.29    0.53
   0   0  -1   -0.06    0.19
   0   0   1    0.13    0.38
   0   0  -1    0.23    0.30
   0   0   1    0.77    0.38
   0   0  -1    0.04    0.17
   0   0   1   -0.10    0.22
   0   0  -1   -0.15    0.21
   0   1   1    2.24    0.29
   0   1  -1   -0.30    0.37
   0  -1   1   -0.16    0.30
   0  -1   1    2.98    0.75
   0  -1  -1    3.01    0.39
   0   1   1    2.96    0.47
   0  -1  -1   -0.14    0.29
   0   1   1    3.16    0.46
   0   1   1    0.19    0.33
   0  -1  -1   -0.24    0.38
   0  -1   1    2.60    0.58
   0   1  -1    2.32    0.66
   0   1  -1   -0.44    0.41
   0   1  -1    3.08    0.46
   0   2   0  268.18    1.56
   0   2   0  274.13    1.73
   0   2   0  276.76    1.62
   0   2   0   61.70    1.17
   0  -2   0  283.35    2.23
   0   2   0  265.17    2.08
   1   0   0    0.49    0.40
   1   0   0    0.11    0.46
   1   0   0    0.96    0.97
   0   2  -1 1801.00    5.74
   0  -2   1 1703.94    6.15
   0   2  -1 1770.53    5.65
   0   2  -1 1758.60    5.28
   0  -2  -1 1727.76    5.80
   0   2   1 1832.53    5.33
   0   2   1 1783.42    5.82
   0   2  -1 1925.79    6.51
   0  -2   1 1740.61    6.16
   0   2   1 1800.86    5.53
   0   2   1 1490.32    2.75
   1   0  -1    3.46    0.64
  -1   0   1    3.65    1.00
  -1   0   1    2.65    0.46
   1   0  -1    3.31    0.52
   1   0  -1    2.71    0.99
   1   0  -1    1.36    0.65
   1   0  -1    2.05    0.45
   1   1   0 1078.95    4.75
   1  -1   0  994.05    4.16
   1   1   0  904.56    2.35
   1   1   0  963.13    4.61
   1  -1   0 1022.15    4.54
   1  -1   0  978.32    3.94
  -1   1   0 1010.84    4.71
   1  -1  -1  344.15    2.48
   1   1  -1  359.35    2.26
   1   1  -1  319.63    2.06
  -1  -1   1  367.05    3.25
   1  -1  -1  338.76    2.07
   1  -1  -1  365.86    2.60
  -1   1   1  309.41    2.56
   1  -1  -1  271.84    2.31
  -1   1   1  349.52    2.08
   1  -1  -1  351.78    3.25
   1   1  -1  243.95    1.49
   1   1  -1  345.52    3.07
   0   0   2 2885.26    7.92
   0   0   2 2870.59    8.31
   0   0  -2 2839.28    8.25
   0   3   0   -0.04    1.04
   0   3   0    0.05    0.75
   0   3   0    0.32    0.64
   0   3   0   -0.02    0.56
   0  -3   0    0.10    0.62
   0   3   0    0.55    0.70
   0   1   2   46.17    1.36
   0   1  -2   47.60    1.76
   0  -1  -2   58.88    1.55
   0   1  -2   47.09    1.42
   0  -1   2   46.48    1.42
   0   1   2   50.75    1.33
   0   1   2   40.69    0.99
   0  -1   2   47.33    1.34
   0  -1   2   54.92    2.03
   0   1   2   53.73    1.35
   0   1  -2   33.81    1.65
   0   1  -2   49.05    1.31
   0  -1  -2   46.80    1.20
   1   0   1 8330.31   11.44
   1   0   1 8245.11   11.01
   1   0   1 8637.18   16.06
  -1   0  -1 8639.36   16.46
   1   2   0 2330.41    4.73
   1   2   0 2158.73    6.67
   1   2   0 1823.86    3.44
   1  -2   0 2254.94    7.13
  -1   2   0 2390.42    8.08
   1  -2   0 2375.29    6.56
   1  -2   0 2217.31    5.99
   1   2   0 2538.15    4.64
   1  -2   0 2345.37    7.90
  -1   2   0 2261.89    7.05
   1  -2   0 2260.01    7.36
  -1  -2   0 1803.13    3.21
   1  -1   1  110.80    1.58
   1   1   1  101.39    1.13
  -1  -1  -1   97.57    1.15
   1  -1   1   94.56    2.04
  -1   1  -1  100.47    2.21
   1   1   1  117.97    2.76
  -1   1  -1   95.78    1.43
   1  -1   1   87.64    1.37
   1  -1   1   92.02    1.61
   1   1   1   91.88    1.12
   1   2  -1 1372.25    4.66
  -1   2   1 1318.14    5.21
   1  -2  -1 1294.73    5.36
   1  -2  -1 1099.73    5.41
  -1  -2   1 1311.24    4.29
   1   2  -1 1306.88    6.02
   1   2  -1 1097.00    4.64
   1  -2  -1 1259.28    5.32
   1  -2  -1 1233.78    3.99
   0   3  -1 2970.08    7.79
   0   3   1 3620.41   10.03
   0  -3  -1 3544.69    9.11
   0   3   1 3622.94    9.80
   0  -3   1 3746.06    9.86
   0   3  -1 3490.36    8.73
   0  -3  -1 2773.08    5.84
   0   3  -1 3985.88   10.60
   0  -3  -1 3358.70   10.19
   0   3  -1 3510.74    9.03
   0  -3  -1 2735.25    4.51
   0   3   1 3633.74    8.61
   1   0  -2    0.00    1.29
  -1   0   2    0.30    1.14
  -1   0   2    0.41    0.63
   1   0  -2    0.35    0.79
   1   0  -2    0.19    0.62
   1   0  -2    0.47    0.69
   1   0  -2    0.25    0.94
  -1   0   2    0.20    0.70
   0   2   2  706.68    4.36
   0   2   2  600.90    2.60
   0   2   2  700.35    4.32
   0  -2  -2  706.68    3.86
   0   2   2  728.00    4.30
   0  -2  -2  712.48    4.61
   0   2  -2  688.89    4.31
   0   2  -2  681.41    4.55
   0  -2  -2  844.62    4.83
   0   2   2  662.20    3.06
   0   2  -2  628.59    4.61
   0  -2   2  734.34    4.96
   0  -2  -2  590.07    2.85
   0  -2   2  696.07    4.61
   0   2  -2  753.53    4.72
   0  -2   2  775.57    4.70
  -1  -1   2 2195.26    6.96
  -1  -1   2 1684.67    6.23
   1  -1  -2 1843.92    5.92
   1  -1  -2 1922.84    7.27
   1   1  -2 1675.68    5.64
   1   1  -2 2209.49    7.29
   1   1  -2 1998.52    6.82
   1  -1  -2 2029.42    5.78
   1   1  -2 2182.84    8.17
  -1  -1   2 2112.52    9.12
  -1   1   2 2191.40    7.91
   1  -1  -2 1875.57    6.67
  -1   1   2 2009.22    5.76
  -1   2  -1   79.07    2.03
  -1  -2  -1   75.35    1.17
   1   2   1   88.42    1.51
   1  -2   1   67.57    1.38
   1  -2   1   75.95    1.68
   1  -2   1   81.16    2.20
   1   2   1   76.17    1.13
  -1   2  -1   84.44    1.88
   1  -2   1   78.83    1.55
  -1   2  -1   79.08    1.44
   1  -3   0 9999.00   18.19
   1  -3   0 9097.08   17.34
   1   3   0 9168.09   12.72
   1   3   0 7731.72   12.14
   1   3   0 8966.18   13.84
   1   3   0 8186.66    8.74
   1   3   0 9157.66    9.56
   1  -3   0 9034.96   16.91
  -1   3   0 9057.41   15.63
  -1   3   0 8939.57   18.53
   1  -3   0 9336.65   14.85
  -1  -3   0 7749.94   13.58
   1  -2  -2  402.66    3.41
   1  -2  -2  348.42    3.36
   1  -2  -2  394.83    3.59
   1  -2  -2  359.27    3.18
  -1   2   2  277.08    3.05
   1   2  -2  362.61    3.11
  -1   2   2  353.28    3.43
   1   2  -2  397.65    3.36
  -1   2   2  321.60    2.27
   1   2  -2  382.70    3.99
  -1  -2   2  320.96    3.92
  -1   2   2  397.15    3.69
  -1  -2   2  232.77    2.00
  -1  -3   1   32.51    1.17
   1   3  -1   29.39    1.00
  -1   3   1   40.07    1.35
   1   3  -1   37.87    1.30
  -1  -3   1   48.73    1.22
   1  -3  -1   38.75    1.75
  -1   3   1   37.55    1.45
   1  -3  -1   45.85    1.51
   1   3  -1   49.55    1.19
   1  -3  -1   30.93    1.27
   1  -3  -1   38.56    1.49
   1   3  -1   41.85    1.60
  -1   3   1   38.20    1.64
   0  -4   0  464.77    4.34
   0  -4   0  487.16    3.14
   0   4   0  466.45    4.11
   0   4   0  438.47    3.74
   0  -4   0  511.51    3.31
   0   4   0  478.99    3.08
   0   4   0  510.10    2.87
   0  -4   0  450.99    3.32
   0   4   0  478.92    3.27
   1   0   2    0.31    0.76
   1   0   2    0.25    1.73
   1   0   2    0.24    1.00
  -1   0  -2    0.14    0.91
  -1   0  -2   -0.02    0.70
   1   0   2    0.23    0.66
  -1   0  -2    0.91    1.91
   0  -3  -2    1.37    1.06
   0  -3   2    1.09    1.20
   0   3  -2    0.93    0.88
   0   3   2    1.41    0.93
   0  -3   2    1.47    1.16
   0   3   2    0.93    0.43
   0  -3   2    0.78    0.94
   0   3   2    0.93    1.08
   0  -3  -2    1.15    0.54
   0   3  -2    0.74    1.36
   0   3   2    1.22    1.00
   0   3  -2    1.33    1.16
   0   3  -2    0.52    1.24
  -1  -1  -2  735.59    3.63
   1  -1   2  864.50    4.88
   1  -1   2  791.72    5.92
  -1  -1  -2  761.48    3.78
   1   1   2  779.66    3.90
   1   1   2  846.83    4.53
  -1  -1  -2  812.89    4.62
  -1   1  -2  787.97    6.03
   1   1   2  869.66    7.31
   1   1   2  726.29    3.67
   1  -1   2  760.84    4.75
   1  -1   2  758.13    4.58
   0  -4   1  177.20    2.47
   0   4   1  175.22    2.64
   0  -4  -1  175.40    1.34
   0   4   1  159.23    1.72
   0   4   1  172.76    1.10
   0   4   1  213.78    2.59
   0  -4  -1  181.15    2.67
   0   4  -1  173.41    2.20
   0   4  -1  196.21    2.71
   0  -4  -1  155.39    1.78
   0   4  -1  165.23    2.63
   0  -4   1  181.06    1.98
   0   4  -1  169.65    2.36
   0   4   1  180.97    2.70
   0   0   3    0.68    0.99
   0   0   3    0.44    1.49
   0   0  -3    1.53    0.83
   0   0   3    0.99    0.95
   0   0   3    1.52    1.02
  -1   3  -1 1286.76    6.67
   1   3   1 1224.80    4.83
  -1  -3  -1 1321.14    4.96
  -1  -3  -1 1292.86    5.36
   1  -3   1 1229.70    6.61
   1  -3   1 1259.59    6.62
   1  -3   1 1214.91    5.83
   1   3   1 1253.21    5.01
  -1   3  -1 1174.43    6.62
   1   3   1 1292.53    5.79
  -1   3  -1 1237.86    5.44
   1  -3   1 1262.67    6.00
   0  -1  -3 1457.83    6.20
   0  -1   3 1527.52    7.05
   0  -1   3 1602.71    8.01
   0   1   3 1562.45    7.40
   0   1  -3 1535.73    8.95
   0   1   3 1598.61    7.20
   0   1   3 1427.10    5.84
   0  -1  -3 1588.22    7.79
   0  -1   3 1464.56    7.21
   0  -1  -3 1618.16    6.62
   0  -1  -3 1873.53    8.00
   0   1  -3 1623.76    8.20
   0  -1   3 1641.55    8.03
   0   1   3 1695.09    7.36
   1   0  -3   10.88    1.19
  -1   0   3    8.27    1.54
  -1   0   3   10.70    1.03
   1   0  -3    8.87    1.16
   1   0  -3    8.51    1.00
  -1   0   3    7.99    0.97
  -1   3   2  413.02    4.00
   1   3  -2  413.30    2.17
  -1   3   2  473.82    4.03
  -1  -3   2  448.10    3.64
  -1  -3   2  283.13    2.10
   1  -3  -2  484.78    3.95
   1  -3  -2  438.56    4.19
   1   3  -2  385.63    3.51
   1   3  -2  452.55    4.53
   1  -3  -2  437.68    3.92
  -1   3   2  368.57    2.49
   1  -3  -2  427.81    3.91
   1   3  -2  498.07    4.13
  -1  -2  -2  161.80    2.02
  -1   2  -2  164.10    2.22
  -1   2  -2  172.33    3.18
   1   2   2  196.45    2.64
   1  -2   2  161.13    2.57
   1   2   2  157.86    1.56
   1  -2   2  157.57    2.49
   1   2   2  146.82    1.52
   1  -2   2  168.18    2.42
   1   2   2  183.10    2.31
   1  -1  -3  929.66    4.23
  -1  -1   3  986.85    5.24
  -1  -1   3  738.58    4.46
  -1   1   3 1011.71    6.06
   1  -1  -3 1070.22    6.14
  -1   1   3  932.18    4.48
   1   1  -3 1057.42    5.58
   1   1  -3 1084.13    6.62
   1  -1  -3  923.01    5.76
   1  -1  -3  771.36    4.77
  -1  -1   3  806.44    3.27
   1   1  -3  879.07    5.76
  -1   1   3  912.39    4.77
   1   1  -3  816.29    4.69
  -1   1   3 1142.71    6.76
  -1  -1   3 1030.33    6.73
  -1  -4   0  192.17    1.78
   1   4   0  193.73    1.74
   1   4   0  192.45    2.36
  -1   4   0  180.95    2.87
  -1   4   0  163.22    2.94
  -1  -4   0  175.45    2.44
  -1   4   0  191.78    2.69
  -1   4   0  203.13    2.23
   1  -4   0  154.07    1.98
   1  -4   0  168.47    2.92
   1  -4   0  195.10    3.06
   1   4   0  185.77    2.35
   1   4   0  223.91    1.80
   1   4   0  178.16    2.31
  -1  -4   0  179.96    2.33
   0   2  -3  126.58    2.65
   0  -2   3  129.07    2.53
   0   2  -3  147.00    2.64
   0  -2   3  141.63    2.52
   0  -2  -3  148.35    2.55
   0   2   3  132.88    2.05
   0  -2   3  126.71    2.53
   0   2   3  163.54    2.75
   0   2  -3  119.54    2.46
   0   2   3  117.81    1.62
   0  -2  -3  150.05    2.19
   0   2  -3  118.36    2.28
   0  -2  -3  118.71    1.85
   0   2   3  145.90    2.62
   0  -2   3  121.83    2.99
  -1   4   1 1512.17    6.80
   1  -4  -1 1377.37    7.96
   1   4  -1 1428.70    5.56
  -1  -4   1 1435.29    7.31
  -1  -4   1 1600.73    6.40
   1   4  -1 1572.86    7.02
   1   4  -1 1505.37    7.16
   1  -4  -1 1437.72    5.11
   1  -4  -1 1464.08    7.67
  -1   4   1 1357.11    7.54
   1   4  -1 1454.39    5.71
   1  -4  -1 1618.83    7.34
  -1  -4   1 1343.80    5.70
  -1   4   1 1661.06    8.59
  -1  -4   1 1495.79    6.05
   2   0  -1    0.18    0.84
   2   0  -1   -0.54    1.12
   2   0  -1    0.25    0.58
  -2   0   1    0.26    0.49
   2   0  -1    0.43    0.67
  -2   0   1    0.35    1.27
   2   0  -1    0.20    1.77
   2   0   0 2727.57    6.46
   2   0   0 2903.15    9.98
   2   0   0 2792.12    8.50
  -2   0   0 2999.03   11.05
   2  -1  -1  104.90    2.16
  -2   1   1  114.37    2.37
   2  -1  -1  110.97    1.80
   2   1  -1   92.27    1.48
   2  -1  -1   94.41    1.80
   2   1  -1   73.91    1.06
  -2  -1   1  112.18    2.26
  -2   1   1   90.07    1.64
   2   1  -1  106.98    2.70
   2   1  -1  123.44    1.96
   2   1  -1  104.18    1.46
  -2  -1   1   88.77    1.31
   2  -1  -1  100.10    1.49
   0  -4   2 4274.90   12.66
   0  -4   2 4077.82   11.03
   0   4   2 4278.39   11.37
   0   4   2 4135.01   12.56
   0  -4  -2 4445.46   12.27
   0   4  -2 4106.53   12.10
   0   4  -2 4382.20   13.03
   0   4  -2 4059.70   11.64
   0   4  -2 4152.37   11.76
   0   4   2 4267.59   12.79
   1  -2  -3  196.20    3.04
  -1   2   3  169.11    2.71
  -1  -2   3  163.49    3.51
  -1   2   3  162.30    2.57
  -1   2   3  158.33    1.91
   1  -2  -3  199.88    3.04
  -1   2   3  162.49    2.66
   1   2  -3  180.92    2.91
   1  -2  -3  204.33    2.89
  -1  -2   3  165.74    2.56
  -1   2   3  190.16    2.74
   1  -2  -3  161.53    2.44
   1   2  -3  171.13    2.70
   1   2  -3  199.65    3.53
  -1  -2   3  141.55    2.07
   2   1   0    6.67    0.56
  -2   1   0    7.81    0.79
   2   1   0    7.61    1.48
   2  -1   0    7.72    1.48
   2   1   0    7.72    0.70
   2  -1   0    8.09    0.95
  -2  -1   0    5.84    1.76
   0   5   0    0.19    0.81
   0   5   0    0.05    1.25
   0   5   0    0.17    1.00
   0  -5   0    0.18    0.89
   0  -5   0    1.30    1.34
   0   5   0   -0.10    0.76
   0  -5   0   -0.17    0.85
   0   5   0    0.39    0.92
   1   4   1 1581.31    5.16
   1   4   1 1690.19    6.11
   1  -4   1 1593.35    7.92
   1   4   1 1642.22    6.73
   1   4   1 1552.12    6.91
  -1  -4  -1 1658.82    7.21
  -1   4  -1 1615.75    8.50
  -1   4  -1 1597.93    6.53
  -1   4  -1 1585.75    7.85
  -1   3  -2 1723.61    9.20
   1   3   2 1696.29    4.33
  -1  -3  -2 1647.51    6.81
  -1   3  -2 1681.25    8.37
   1   3   2 1670.37    6.60
   1  -3   2 1605.88    7.78
   1  -3   2 1737.18    8.24
  -1   3  -2 1721.03    7.18
   1  -3   2 1771.44    8.01
   1   3   2 1763.54    7.09
   2   0  -2  981.99    7.05
  -2   0   2  761.16    4.74
  -2   0   2  866.15    4.68
   2   0  -2  893.77    4.14
  -2   0   2  969.71    4.63
   2   0  -2  700.89    4.46
  -2   0   2  975.79    7.53
   2   0  -2  878.67    4.64
   2   0  -2  870.23    5.06
  -2   2   1 1120.21    6.73
  -2   2   1  956.25    5.71
   2   2  -1 1085.97    6.88
   2   2  -1 1178.11    5.90
   2   2  -1 1073.90    4.64
  -2  -2   1 1004.85    4.18
   2  -2  -1 1049.96    5.77
   2  -2  -1 1073.10    6.03
   2  -2  -1 1206.13    6.64
   2  -2  -1  995.99    5.79
   2   2  -1 1098.56    3.71
   2  -2  -1 1095.52    4.81
   0  -5   1   48.48    1.68
   0   5   1   49.63    0.79
   0   5  -1   45.63    1.86
   0  -5   1   37.17    1.84
   0   5   1   51.75    1.85
   0  -5   1   41.77    2.06
   0  -5  -1   51.75    1.66
   0  -5  -1   51.16    1.19
   0   5  -1   48.64    1.85
   0  -5  -1   45.82    1.38
   0   5   1   49.38    1.40
   0   5  -1   56.19    1.77
   0   5   1   48.48    1.45
   0   5  -1   47.61    1.67
   0   5   1   46.56    1.88
   0   5  -1   47.43    1.49
   0  -5   1   50.25    1.34
   0   3   3   20.12    1.34
   0   3  -3   21.06    1.38
   0  -3  -3   18.15    0.98
   0   3  -3   19.47    1.55
   0   3   3   16.18    0.99
   0  -3   3   16.58    1.38
   0   3   3   16.50    0.74
   0  -3   3   13.11    1.97
   0   3   3   20.07    1.25
   0  -3   3   19.22    1.53
   0  -3   3   20.62    1.41
   0   3  -3   21.27    1.57
   0   3  -3   17.11    1.70
   2  -1  -2  567.34    3.85
  -2   1   2  531.96    3.37
   2   1  -2  596.24    2.93
   2  -1  -2  533.83    3.59
   2   1  -2  449.80    3.34
   2  -1  -2  505.40    3.97
  -2   1   2  498.91    4.00
  -2   1   2  630.53    4.46
   2   1  -2  594.04    5.42
  -2   1   2  477.50    3.94
  -2  -1   2  521.67    3.73
  -2  -1   2  522.60    3.23
   2   1  -2  414.48    3.08
   2   1  -2  539.24    3.80
  -2  -1   2  533.01    3.57
   2  -1  -2  452.41    3.86
  -2  -1   2  604.05    5.99
   2   2   0 2858.38    6.41
  -2   2   0 2798.77    9.72
  -2  -2   0 2807.36    6.00
   2  -2   0 3022.30    9.73
   2  -2   0 2840.64    9.79
   2  -2   0 2902.18    9.31
   2  -2   0 2984.71   11.04
   2   2   0 2884.10   11.93
   2   2   0 3153.18   10.70
   1  -4  -2    5.61    1.22
   1  -4  -2    4.55    0.97
   1  -4  -2    4.21    1.26
   1  -4  -2    3.81    0.72
   1   4  -2    4.45    1.60
   1   4  -2    4.73    1.01
  -1  -4   2    5.31    0.96
  -1  -4   2    3.41    0.86
  -1   4   2    4.94    1.02
   1   4  -2    5.44    0.97
  -1  -4   2    5.71    1.24
   1  -4  -2    4.50    1.55
   1   4  -2    5.07    1.23
  -1   4   2    4.95    1.16
   1   0   3  278.82    3.08
   1   0   3  267.46    3.09
  -1   0  -3  285.44    3.19
  -1   0  -3  277.00    2.86
  -2   0  -1    0.02    0.49
  -2   0  -1    0.24    0.97
   2   0   1    0.56    0.85
   2   0   1    0.18    1.75
   2   0   1    0.13    0.56
  -1   1  -3  276.96    3.35
  -1   1  -3  275.25    3.49
  -1  -1  -3  295.19    3.48
   1   1   3  321.64    5.27
  -1  -1  -3  253.30    2.57
   1   1   3  279.29    2.92
   1   1   3  304.92    3.38
   1  -1   3  294.30    3.41
   1  -1   3  251.11    3.18
   1  -1   3  257.97    3.28
   1   1   3  229.58    2.64
  -1  -1  -3  280.90    2.92
  -1   1  -3  310.21    4.82
  -2   1  -1   15.87    0.85
   2   1   1   15.90    0.88
  -2   1  -1   17.69    1.26
  -2  -1  -1   13.44    0.54
   2   1   1   17.65    0.58
   2  -1   1   17.50    1.80
   2   1   1   16.37    1.98
   2  -1   1   16.96    0.95
   2  -1   1   16.10    1.17
  -1  -3   3   58.83    1.42
   1   3  -3   44.14    1.31
   1  -3  -3   87.07    2.16
   1   3  -3   83.46    2.61
  -1   3   3   87.40    2.25
  -1   3   3   88.43    2.14
  -1   3   3   86.80    2.24
   1  -3  -3  113.75    2.91
   1  -3  -3   92.44    2.18
   1   3  -3   80.00    2.12
   1   3  -3   89.12    2.17
  -1   3   3   77.04    1.36
   1  -3  -3   85.89    2.07
  -1  -3   3   75.92    2.69
   1  -3  -3   72.43    1.53
   2   2  -2 1930.66    4.85
   2  -2  -2 1835.13    7.56
  -2   2   2 1972.54    8.27
  -2  -2   2 1963.93    5.24
  -2  -2   2 2030.42    7.20
   2  -2  -2 1578.81    7.79
  -2  -2   2 1644.19    9.47
  -2  -2   2 1862.39    6.85
   2   2  -2 1859.15    7.05
   2   2  -2 1913.58    9.35
   2   2  -2 1758.96    7.21
   2  -2  -2 1911.16    6.75
  -2   2   2 1550.24    7.97
  -2   2   2 1900.53    6.32
   2  -2  -2 1910.26    8.09
  -1   5   0   13.32    1.29
   1   5   0   13.85    1.15
  -1   5   0   12.79    1.36
  -1  -5   0   15.06    1.36
   1   5   0   11.46    1.39
  -1  -5   0   13.42    1.22
  -1  -5   0    9.80    0.80
   1   5   0   12.46    1.16
   1  -5   0   10.61    1.59
   1   5   0   14.91    0.87
   1   5   0   10.39    0.79
  -1   5   0   13.29    0.99
   1  -5   0   12.81    1.02
  -1  -5   0   13.43    1.09
  -1   5   0   11.43    1.64
   1  -5   0   12.27    1.28
  -1   5   1  235.68    3.63
  -1  -5   1  262.44    3.03
   1  -5  -1  219.49    2.93
   1   5  -1  271.12    2.86
  -1   5   1  266.08    3.20
  -1   5   1  292.56    4.03
   1   5  -1  245.46    3.29
   1   5  -1  322.68    3.60
  -1   5   1  239.98    2.99
   1   5  -1  241.83    2.84
   1  -5  -1  250.68    3.73
  -1  -5   1  246.46    2.79
   1  -5  -1  248.64    2.29
  -1  -5   1  226.17    3.28
   1  -5  -1  274.10    3.68
   1   5  -1  244.42    3.35
   2   3  -1    8.30    0.93
   2   3  -1    9.84    1.28
   2   3  -1   12.35    0.76
  -2   3   1   10.28    1.18
   2  -3  -1    9.62    1.06
   2   3  -1   11.61    1.82
  -2  -3   1   11.33    1.65
   2   3  -1    8.39    0.45
   2  -3  -1   10.73    1.57
   2  -3  -1   11.22    1.13
   2  -3  -1   10.62    1.13
  -2   3   1   10.11    1.11
  -2  -3   1   10.38    0.71
   2  -3  -1   11.33    0.86
   1  -2   3   27.89    1.44
   1  -2   3   29.14    1.58
   1   2   3   29.62    1.34
   1   2   3   30.88    1.49
   1   2   3   32.28    1.14
   1  -2   3   28.16    1.37
   1   2   3   26.69    1.03
  -1  -2  -3   31.10    1.23
  -1  -2  -3   28.60    0.97
  -1  -2  -3   28.59    1.24
  -1   2  -3   26.94    2.12
   2   2   1   17.60    0.54
  -2   2  -1   14.94    1.18
   2   2   1   13.89    0.59
   2   2   1   17.31    0.93
   2  -2   1   14.81    1.72
   2  -2   1   15.32    1.21
   2   2   1   18.01    2.12
   2  -2   1   15.53    0.99
  -2   2  -1   14.88    1.02
   0   0   4 2422.23   12.93
   0   0   4 1968.81    8.44
   0   0  -4 2055.33    9.07
   0   0   4 2313.80   10.52
   0   0  -4 1976.93    8.85
   0   0  -4 2127.51   10.45
   0   0   4 2080.86    9.99
   0   0   4 2120.59   10.04
   2  -3   0  661.77    5.15
   2  -3   0  752.73    6.42
   2   3   0  385.64    2.23
   2  -3   0  789.52    5.44
   2   3   0  642.65    5.14
   2  -3   0  676.00    5.11
   2   3   0  668.82    3.15
   2  -3   0  568.26    4.31
   2   3   0  961.86    7.69
  -2   3   0  652.24    5.47
  -2  -3   0  641.81    2.72
  -2   3   0  779.95    5.96
   2   3   0  717.06    2.67
   1  -4   2   36.61    1.66
   1   4   2   42.91    1.49
   1   4   2   34.74    1.04
   1  -4   2   30.39    1.44
   1   4   2   38.68    1.36
  -1   4  -2   38.09    1.80
  -1  -4  -2   34.34    1.40
   1  -4   2   33.21    1.51
  -1   4  -2   38.57    1.42
   1   4   2   38.92    1.52
   1   4   2   37.00    0.68
  -1   4  -2   37.34    2.01
  -1   0   4    0.80    1.01
  -1   0   4    1.20    0.89
   1   0  -4    2.04    1.75
   1   0  -4    2.19    1.05
   1   0  -4    1.68    1.12
  -1   0   4    1.60    0.94
  -1   0   4    1.85    1.54
   0   5  -2  182.88    2.88
   0   5   2  191.25    3.14
   0  -5   2  176.55    2.84
   0   5  -2  171.40    2.98
   0   5   2  193.89    3.25
   0  -5   2  160.09    2.71
   0  -5  -2  221.20    3.52
   0  -5  -2  162.43    1.99
   0  -5  -2  219.02    3.28
   0   5  -2  200.05    3.22
   0   5   2  190.45    2.72
   0   5  -2  176.22    2.64
   0  -5  -2  158.35    1.54
   0   1   4   39.24    1.68
   0   1   4   41.85    1.90
   0  -1  -4   37.09    1.58
   0   1  -4   42.10    1.79
   0   1   4   36.51    1.42
   0  -1   4   36.89    2.03
   0  -1   4   40.96    1.80
   0  -1  -4   39.97    1.91
   0  -1  -4   37.96    1.68
   0   1   4   41.94    1.68
   0  -1   4   45.54    2.44
   0  -1   4   40.30    1.76
  -2   0   3    1.04    0.89
  -2   0   3    1.09    1.00
   2   0  -3    0.46    1.04
   2   0  -3    0.81    0.85
  -2   0   3    1.00    0.84
   2   0  -3    0.63    1.02
  -2   0   3    0.40    1.46
   2   0  -3    0.89    1.49
  -2   0   3    0.75    0.91
   2   0  -3    0.90    0.87
   1   1  -4 3155.28   12.50
  -1  -1   4 2837.48   10.40
  -1  -1   4 2640.00   12.65
  -1   1   4 3076.06   12.05
   1  -1  -4 2316.17    9.47
  -1   1   4 2753.30    9.61
  -1  -1   4 2446.79   10.18
   1   1  -4 2923.40   10.58
   1  -1  -4 2973.07   11.66
   1  -1  -4 2911.60   11.46
   1   1  -4 2511.48    9.65
  -1  -1   4 2765.85   10.88
  -1   1   4 2983.37   12.41
  -1   1   4 2727.52    9.16
   0  -4  -3  940.19    4.43
   0   4   3 1056.40    6.73
   0   4   3 1056.54    6.80
   0   4   3 1094.05    6.74
   0  -4  -3 1133.70    6.69
   0   4  -3 1004.83    6.76
   0  -4   3 1028.91    7.87
   0   4   3  894.63    3.59
   0   4  -3 1088.44    7.68
   0   4  -3 1004.47    6.59
   0   4   3  967.67    3.63
   0   4  -3 1076.20    7.06
   0  -4   3 1090.08    6.96
   0  -4   3 1054.73    7.13
   0  -4   3  954.41    6.02
   1   5   1 1720.23    7.88
  -1  -5  -1 1806.66    7.76
  -1   5  -1 1688.39    8.50
   1   5   1 1719.36    3.75
  -1  -5  -1 1738.03    4.09
   1  -5   1 1667.10    8.07
   1   5   1 1718.36    5.27
  -1  -5  -1 1718.46    6.22
  -1   5  -1 1828.95    9.06
  -1   5  -1 1638.12    9.37
  -1   5  -1 1772.93    7.14
  -1   5  -1 1660.97    9.27
  -1  -5  -1 1775.91    8.29
   1   5   1 1811.22    6.55
   1   5   1 1782.55    8.11
  -2   1   3 1112.59    8.10
   2   1  -3 1070.82    5.90
  -2  -1   3  943.61    5.49
  -2   1   3  953.77    6.50
   2  -1  -3 1002.86    5.26
   2   1  -3 1141.36    6.74
   2  -1  -3  859.94    5.43
   2  -1  -3 1154.04    7.11
   2   1  -3  596.93    2.46
   2   1  -3  729.19    4.63
   2  -1  -3 1040.14    5.56
  -2   1   3  980.84    6.14
   2   1  -3 1176.52    8.02
  -2  -1   3 1223.59    3.96
  -2  -1   3  949.06    6.15
  -2   1   3 1159.27    5.74
  -2  -1   3 1168.22    8.45
  -2   1   3 1020.11    5.18
   2   3  -2   19.96    0.63
   2   3  -2   18.50    0.61
   2   3  -2   44.81    1.42
  -2   3   2   43.87    2.04
  -2  -3   2   47.69    1.36
   2  -3  -2   39.72    2.13
   2   3  -2   34.34    1.41
  -2  -3   2   34.25    1.28
   2  -3  -2   39.94    1.89
  -2   3   2   33.48    1.56
   2   3  -2   43.38    2.19
  -2   3   2   36.94    1.15
   2  -3  -2   39.14    1.22
   2  -3  -2   37.88    1.60
   2   3  -2   16.32    0.96
   2  -3  -2   44.90    1.71
   0   6   0  183.22    2.36
   0  -6   0  204.33    2.73
   0   6   0  197.96    2.22
   0  -6   0  180.23    2.62
   0   6   0  175.36    3.20
   0   6   0  181.81    2.61
   0  -6   0  185.83    2.84
   0   6   0  153.39    2.87
   1  -4  -3 1607.74    8.51
  -1   4   3 1368.34    5.47
   1  -4  -3 1389.53    6.13
  -1  -4   3 1440.90    7.68
   1   4  -3 1384.53    7.46
   1  -4  -3 1450.10    8.86
   1  -4  -3 1479.43    6.84
   1   4  -3 1497.97    5.85
  -1   4   3 1641.44    9.40
   1   4  -3 1409.06    8.58
   1   4  -3 1673.10    9.17
   1  -4  -3 1576.01    7.79
  -1   4   3 1722.33    9.20
   0  -2  -4   72.46    2.18
   0   2   4   64.05    2.03
   0   2  -4   73.49    2.94
   0  -2   4   59.03    2.26
   0   2   4   56.80    1.49
   0  -2   4   58.92    2.58
   0  -2  -4   67.53    2.03
   0  -2   4   65.42    2.07
   0   2   4   66.30    2.03
   0   2   4   71.41    2.12
   0  -2   4   56.85    2.12
   0  -2  -4   63.71    1.77
   0   2  -4   69.52    2.28
   1  -5  -2  355.88    4.45
   1   5  -2  320.19    4.15
   1   5  -2  401.94    4.34
  -1  -5   2  354.49    4.00
  -1  -5   2  265.44    2.89
   1  -5  -2  350.71    4.26
  -1   5   2  356.20    4.70
  -1   5   2  363.96    3.89
   1  -5  -2  333.90    2.82
   1   5  -2  342.38    3.17
  -1   5   2  332.74    4.27
  -1  -5   2  372.85    4.02
   1   5  -2  322.98    3.49
   1  -5  -2  329.73    3.51
  -1  -5   2  337.45    4.66
  -2   0  -2    3.38    1.09
   2   0   2    3.40    0.69
   2   0   2    1.68    1.00
   2   0   2    3.15    1.89
  -2   0  -2    3.77    0.78
   2   0   2    3.44    0.74
   1   3   3  634.81    3.02
  -1  -3  -3  685.06    3.28
   1  -3   3  666.63    5.68
   1   3   3  693.99    3.69
  -1  -3  -3  731.99    5.45
  -1   3  -3  689.80    5.27
   1   3   3  745.62    5.47
  -1   3  -3  716.47    6.63
   1   3   3  710.05    5.15
   1  -3   3  669.01    5.41
   1  -3   3  682.44    5.46
  -2  -3  -1   42.53    1.04
  -2   3  -1   47.94    2.15
   2   3   1   44.31    0.75
  -2   3  -1   52.35    1.63
  -2   3  -1   49.45    1.78
   2  -3   1   45.57    1.67
   2  -3   1   50.62    2.32
   2  -3   1   47.77    1.43
   2   3   1   43.56    1.99
   2   3   1   42.08    0.98
   2   3   1   51.03    0.97
   1   2  -4  835.52    6.67
  -1   2   4  785.48    5.48
   1  -2  -4  854.57    6.45
  -1  -2   4  698.72    6.86
   1  -2  -4  782.58    6.24
   1   2  -4  742.50    6.53
  -1  -2   4  620.30    4.74
   1  -2  -4  836.58    6.19
  -1  -2   4  673.10    4.50
  -1   2   4  683.77    4.45
   1   2  -4  740.10    5.61
  -1   2   4  699.39    5.44
  -1   2   4  836.28    6.56
   1  -2  -4  674.47    4.82
  -1  -2   4  739.25    5.57
   1  -2  -4  743.48    4.63
  -2   1  -2  112.76    3.09
   2   1   2  113.61    1.77
   2   1   2   99.00    1.80
  -2  -1  -2  102.74    1.92
   2  -1   2   95.25    2.12
  -2  -1  -2  102.26    1.74
   2  -1   2   92.18    1.81
   2   1   2   90.98    1.62
  -2   1  -2  109.99    2.10
  -2   1  -2  101.92    2.30
   2   1   2  108.02    3.15
   2  -1   2  115.06    2.08
   2  -1   2  103.39    3.10
   2  -2  -3  709.86    4.91
  -2   2   3  706.55    5.17
  -2  -2   3  552.26    3.90
   2  -2  -3  636.36    4.31
  -2  -2   3  683.82    6.61
   2  -2  -3  560.57    4.81
  -2  -2   3  677.62    5.10
   2  -2  -3  620.33    5.25
   2  -2  -3  653.96    6.02
   2   2  -3  682.91    4.99
   2   2  -3  675.43    6.21
  -2   2   3  649.16    6.00
   2   2  -3  558.56    5.03
  -2   2   3  602.72    3.99
  -2   2   3  602.02    5.08
   2   2  -3  469.40    3.40
   0   6   1  114.35    2.74
   0  -6   1  131.12    2.10
   0   6  -1  128.15    2.79
   0  -6  -1  137.25    2.02
   0   6   1  127.21    2.88
   0   6  -1  144.64    2.72
   0  -6  -1  117.07    2.12
   0  -6   1  129.55    2.57
   0   6   1  128.66    2.06
   0   6  -1  128.90    2.43
   0   6   1  138.16    1.36
   0   6  -1  120.47    2.82
   0   6  -1  128.57    2.16
   0  -6  -1  132.08    2.53
   0  -6   1  131.59    2.92
   0  -6   1  110.75    2.76
   0   6   1  130.26    2.33
   2  -4  -1  418.83    4.16
   2  -4  -1  372.79    4.39
   2   4  -1  385.64    4.29
  -2  -4   1  363.90    4.58
   2   4  -1  348.92    3.04
  -2  -4   1  357.45    2.75
   2   4  -1  294.05    2.61
   2  -4  -1  313.72    3.85
   2  -4  -1  406.96    3.46
   2  -4  -1  363.83    3.98
  -2   4   1  340.80    4.17
  -2   4   1  395.32    3.88
  -2  -4   0  106.11    1.13
   2  -4   0  108.16    2.88
   2  -4   0  110.34    2.45
   2   4   0   97.27    1.82
   2   4   0  140.24    1.75
   2   4   0  111.16    1.48
   2   4   0   73.42    1.22
   2   4   0  132.46    1.79
   2  -4   0  130.21    2.79
  -2   4   0  101.18    2.46
   2  -4   0  109.88    2.34
  -2   4   0  120.08    2.62
   2   4   0  102.11    2.41
   2   2   2  477.13    3.23
   2  -2   2  446.88    4.49
   2  -2   2  445.99    5.00
  -2   2  -2  445.54    4.01
  -2   2  -2  487.88    5.82
  -2  -2  -2  438.53    3.27
   2   2   2  533.88    3.49
   2  -2   2  506.73    4.28
  -2   2  -2  512.22    4.49
  -2  -2  -2  441.05    3.17
   2   2   2  494.66    5.85
  -2   2  -2  549.03    5.53
   2   2   2  432.58    3.31
   2  -2   2  422.35    3.82
   0  -3   4    0.79    2.11
   0  -3  -4    0.30    1.31
   0  -3   4    0.55    1.37
   0   3  -4    0.56    1.36
   0   3   4    0.20    1.11
   0  -3  -4    0.34    1.15
   0   3   4    0.42    0.72
   0   3  -4    0.55    0.99
   0   3  -4    0.48    1.61
   0  -3   4    0.33    1.07
   0   3   4    0.48    1.21
   0  -3   4    0.34    1.42
   0   3  -4    0.60    1.36
   0   3   4    0.69    1.08
   1   5   2  268.74    3.31
   1  -5   2  229.71    3.36
   1   5   2  230.15    3.08
   1   5   2  238.62    3.50
  -1   5  -2  220.53    3.79
  -1   5  -2  228.29    2.98
  -1   5  -2  233.92    3.59
   1   5   2  197.18    1.55
   1   5   2  205.59    1.21
   1  -5   2  233.86    3.62
  -1  -5  -2  241.74    3.34
  -1  -5  -2  276.42    3.40
  -1  -6   0  370.86    3.68
  -1   6   0  372.46    3.20
  -1  -6   0  413.12    3.58
  -1  -6   0  364.38    3.99
  -1   6   0  354.41    3.92
  -1  -6   0  392.57    3.27
  -1   6   0  379.27    4.79
   1  -6   0  361.97    4.70
   1  -6   0  341.53    3.69
   1   6   0  372.86    2.81
   1   6   0  329.96    3.01
   1   6   0  408.22    3.98
   1  -6   0  359.86    3.53
   1  -6   0  335.41    3.97
   1   6   0  352.03    4.15
   1   6   0  350.72    3.97
  -1   6   0  337.36    4.56
   1   6   0  365.78    3.44
   1  -3  -4 1596.39    8.17
  -1   3   4 1448.44    7.72
  -1   3   4 1629.21    8.63
  -1  -3   4 1311.03    9.72
  -1   3   4 1381.80    5.95
   1  -3  -4 1493.94    7.10
  -1   3   4 1596.28    9.05
   1   3  -4 1271.52    7.48
  -1  -3   4 1430.36    8.43
   1  -3  -4 1544.09    8.81
   1  -3  -4 1565.86    8.21
   1   3  -4 1622.75    9.82
  -1  -3   4 1281.75    7.16
   1   3  -4 1503.54    8.41
  -1   3   4 1533.92    8.79
   1   3  -4 1462.19    9.29
   1  -3  -4 1397.74    6.82
   2  -4  -2  346.81    3.83
  -2   4   2  434.75    4.44
   2  -4  -2  455.82    4.57
   2  -4  -2  420.07    4.72
  -2  -4   2  454.25    3.71
   2   4  -2  272.46    2.14
   2  -4  -2  402.02    4.48
   2   4  -2  396.61    3.68
  -2  -4   2  365.06    3.43
   2   4  -2  454.56    4.35
   2   4  -2  351.04    4.23
  -2   4   2  280.34    3.94
  -2  -4   2  327.93    4.70
  -1   6   1   28.52    1.46
  -1  -6   1   32.37    1.64
  -1   6   1   23.69    1.91
   1   6  -1   31.87    1.56
  -1   6   1   29.99    1.92
   1  -6  -1   31.74    1.65
  -1  -6   1   27.82    1.86
   1   6  -1   31.83    1.50
   1   6  -1   30.67    1.42
   1  -6  -1   26.11    1.61
   1   6  -1   25.53    1.54
   1   6  -1   26.57    2.03
  -1   6   1   27.28    1.44
   1  -6  -1   23.00    2.13
   1  -6  -1   27.35    1.06
  -1  -6   1   26.74    1.48
  -2   3   3    1.32    0.73
   2  -3  -3    0.95    0.92
  -2  -3   3    0.64    1.01
   2   3  -3    0.89    0.92
   2  -3  -3    0.21    1.24
  -2  -3   3    0.47    0.91
   2   3  -3    0.87    1.71
  -2   3   3    0.17    0.99
   2  -3  -3    0.79    1.40
  -2  -3   3    0.51    0.77
   2   3  -3    1.28    1.21
   2   3  -3    0.51    0.67
   2  -3  -3    0.03    1.58
  -2   3   3    0.50    1.50
  -1   0  -4   -0.07    1.01
  -1   0  -4    0.07    1.23
  -1   0  -4    0.36    0.99
   1   0   4    0.00    1.30
   1   0   4    0.21    1.04
   1   0   4    0.10    1.12
   0   5  -3   81.89    2.33
   0   5   3   94.06    2.50
   0   5   3   88.95    2.49
   0   5   3   86.49    2.15
   0  -5  -3   77.09    1.40
   0   5  -3   99.62    2.51
   0  -5  -3  105.62    2.67
   0   5  -3   77.22    2.05
   0  -5  -3   91.30    2.36
   0   5   3   73.69    1.12
   0  -5   3   97.20    2.51
   0  -5   3   74.80    2.23
   0   5  -3   82.06    2.26
   1  -4   3 2818.68   12.14
  -1  -4  -3 3162.66   11.52
  -1  -4  -3 3372.47   11.49
   1   4   3 3493.83   11.93
   1   4   3 3410.71   12.65
  -1   4  -3 3307.58   14.78
  -1   4  -3 3168.62   12.45
   1  -4   3 2933.80   12.02
   1   4   3 3125.27   10.91
  -1   4  -3 3205.52   11.53
   1   4   3 3144.46    6.74
   1   4   3 2524.58    4.80
   1  -4   3 2957.59   11.59
   1  -4   3 3248.60   13.25
   2   4   1   17.03    0.51
  -2   4  -1   19.46    1.83
  -2   4  -1   20.07    1.36
  -2   4  -1   16.90    1.39
  -2   4  -1   19.59    1.57
   2  -4   1   17.28    1.88
   2   4   1   21.06    1.17
   2   4   1   14.98    0.85
   2   4   1   16.51    1.62
  -2  -4  -1   20.52    0.93
   2  -4   1   16.04    1.39
   0  -6  -2  206.45    2.46
   0   6  -2  204.06    3.30
   0  -6   2  184.72    3.06
   0   6  -2  197.54    2.89
   0  -6  -2  191.30    1.84
   0   6   2  222.68    3.70
   0  -6   2  216.36    3.55
   0   6  -2  200.37    3.10
   0   6  -2  217.56    3.53
   0   6   2  208.29    3.66
   0  -6  -2  239.82    3.83
   0   6   2  257.54    3.59
   0  -6   2  196.26    3.89
   1   1   4   99.11    2.53
  -1   1  -4   84.90    2.30
  -1   1  -4   92.08    3.95
   1  -1   4   81.47    2.12
  -1  -1  -4   93.25    2.36
   1   1   4   83.45    2.02
   1  -1   4   87.06    2.28
  -1  -1  -4   87.36    1.89
  -1   1  -4   85.45    2.09
   1   1   4   79.11    2.11
   1   1   4   93.87    2.38
  -1  -1  -4   86.16    2.11
  -1   1  -4   91.54    2.47
   1  -1   4   83.29    2.27
   1  -5  -3   10.04    1.24
   1  -5  -3    9.41    1.54
   1  -5  -3    9.03    0.91
  -1   5   3   13.08    1.60
   1   5  -3    9.88    1.35
  -1  -5   3    8.79    1.19
   1   5  -3    8.13    2.50
  -1  -5   3   10.90    1.47
   1   5  -3   11.56    1.31
  -1  -5   3    8.63    1.20
   1   5  -3   10.26    1.33
  -1   5   3    9.28    0.76
   1  -5  -3   12.52    1.26
  -1   5   3   10.50    1.34
  -1  -6  -1   79.95    1.32
   1  -6   1   76.72    1.95
  -1  -6  -1   82.54    2.16
  -1  -6  -1  102.12    2.26
   1  -6   1   81.47    2.12
  -1   6  -1   74.44    2.40
   1   6   1   75.21    1.12
   1   6   1   75.85    2.21
  -1   6  -1   78.58    2.22
  -1  -6  -1   90.03    2.31
  -1   6  -1   81.76    2.17
   1   6   1   79.24    1.47
  -1   6  -1   80.78    1.82
  -1  -6  -1   76.29    1.57
   1   6   1   82.15    2.10
  -1   6  -1   75.17    2.57
   1   6   1   92.14    1.94
  -2   0   4   48.90    2.28
   2   0  -4   42.44    1.64
   2   0  -4   48.17    1.78
  -2   0   4   44.67    1.79
  -2   0   4   48.22    1.61
   2   0  -4   37.46    1.09
   2   0  -4   35.68    1.50
  -2   0   4   39.99    1.69
  -2   0   4   45.07    1.42
   2  -3   2  121.19    3.07
   2  -3   2  123.68    2.31
   2  -3   2  141.00    2.56
  -2   3  -2  132.85    2.54
   2   3   2  169.21    4.65
   2   3   2  145.25    2.01
   2   3   2  136.96    2.33
   2  -3   2  126.22    2.66
  -2  -3  -2  120.73    1.91
   2   3   2  121.24    1.88
  -2   3  -2  142.47    2.53
   2   3   2  147.38    1.55
  -2   3  -2  146.90    3.67
  -2  -1   4  111.44    2.31
   2   1  -4  123.35    2.62
  -2  -1   4  143.00    2.88
  -2   1   4  129.59    2.82
   2  -1  -4  175.60    3.76
   2   1  -4  158.52    2.82
   2  -1  -4  118.06    2.51
   2   1  -4  134.12    2.75
   2  -1  -4  139.41    2.22
  -2   1   4  136.68    3.02
  -2   1   4  147.25    3.37
  -2  -1   4  104.79    1.43
  -2   1   4  149.55    2.55
  -2   1   4  139.96    2.48
   2  -1  -4  129.06    2.70
  -2  -1   4  140.04    2.46
  -2  -1   4  166.22    3.65
   2  -1  -4  147.07    2.52
   2   1  -4  130.46    3.30
  -1   2  -4  131.05    2.85
   1   2   4  150.99    3.04
   1   2   4  139.30    2.70
   1   2   4   94.50    2.45
   1  -2   4  125.66    2.80
   1  -2   4  125.78    2.76
  -1   2  -4  135.77    3.66
  -1   2  -4  125.38    2.78
  -1  -2  -4  127.87    2.55
  -1  -2  -4  124.43    1.94
   1   2   4  116.71    2.07
   1  -2   4  121.96    3.37
   1  -2   4  125.34    2.69
  -1  -2  -4  136.10    2.35
   1  -6  -2   80.16    1.34
  -1   6   2   81.66    2.39
  -1  -6   2   83.60    2.38
  -1   6   2   83.24    2.53
  -1   6   2   71.97    2.46
   1   6  -2   73.26    2.74
   1   6  -2   90.88    2.28
   1   6  -2   67.45    2.00
   1  -6  -2   75.21    1.49
   1  -6  -2   77.78    2.58
   1  -6  -2   84.62    2.37
  -1  -6   2   74.68    2.08
  -1  -6   2   83.79    2.19
   1  -6  -2   73.57    1.87
  -1  -6   2   87.30    2.88
   1   6  -2   98.71    2.46
  -2   5   1  564.40    4.80
  -2   5   1  589.97    6.09
   2  -5  -1  529.20    4.11
   2  -5  -1  502.75    5.17
   2  -5  -1  567.95    5.12
   2  -5  -1  521.59    5.42
   2   5  -1  553.15    3.88
  -2  -5   1  534.42    3.63
   2   5  -1  612.36    4.46
   2   5  -1  630.75    4.51
   2   5  -1  505.15    3.74
   2   5  -1  434.46    4.46
  -2  -5   1  457.65    5.22
   2  -5  -1  466.62    4.75
   0  -4   4 1517.48    8.95
   0   4  -4 1758.77    9.35
   0  -4   4 1815.68    9.59
   0   4   4 1646.91    6.15
   0  -4  -4 1746.36    7.18
   0  -4   4 1824.21   10.69
   0   4  -4 1748.96    9.25
   0   4   4 1816.80    6.66
   0   4   4 1728.77    9.23
   0   4   4 2102.54   10.76
   0   4  -4 1733.86    9.87
   0  -4   4 1677.08   11.14
   0   4  -4 1983.58   11.12
   2   5   0   19.57    1.72
   2   5   0   23.71    1.11
   2   5   0   11.76    0.74
  -2   5   0   16.75    1.52
   2  -5   0   18.46    1.48
   2  -5   0   17.08    1.03
   2  -5   0   17.00    1.30
   2   5   0   22.67    1.12
   2  -5   0   14.78    1.35
   2   5   0   17.83    1.00
   2  -5   0   18.53    2.12
  -2  -5   0   16.92    1.76
  -2  -5   0   16.45    0.65
   2   5   0   14.43    1.26
  -2   5   0   16.38    2.00
  -2   5   0   17.47    1.53
  -1   4   4   22.49    1.63
  -1   4   4   26.30    1.84
  -1  -4   4   23.26    2.33
   1  -4  -4   23.60    1.57
   1  -4  -4   25.42    1.77
   1  -4  -4   27.75    1.71
   1  -4  -4   22.63    1.31
  -1  -4   4   17.35    1.43
   1   4  -4   22.67    1.53
   1   4  -4   28.27    1.67
  -1  -4   4   25.66    1.24
  -1   4   4   20.41    1.62
   1  -4  -4   25.77    1.64
  -1   4   4   26.94    1.63
  -1   4   4   22.37    0.96
  -1  -4   4   19.62    1.52
   1   4  -4   23.81    2.49
   1   4  -4   25.46    1.84
  -2   0  -3   -0.15    2.62
  -2   0  -3    0.43    1.07
   2   0   3   -0.13    1.96
  -2   0  -3    0.30    0.91
   2   0   3    0.05    0.79
   2   0   3   -0.09    0.91
   2   0   3    0.15    0.98
  -2   0  -3   -0.19    0.83
   0   7   0    0.09    1.10
   0   7   0   -0.20    0.95
   0   7   0    0.07    1.48
   0   7   0    0.28    0.78
   0  -7   0    0.37    1.62
   0  -7   0    0.53    1.06
   0   7   0   -0.49    1.05
   0  -7   0    0.08    0.98
   0  -7   0    0.09    1.84
  -2   2   4    2.55    1.38
  -2  -2   4    1.49    0.99
  -2  -2   4    2.24    1.58
  -2   2   4    2.77    0.75
   2  -2  -4    2.20    1.19
  -2   2   4    3.22    1.63
   2  -2  -4    3.08    1.85
  -2   2   4    1.91    1.17
   2   2  -4    2.17    1.22
  -2   2   4    2.30    1.38
   2  -2  -4    1.00    0.88
   2  -2  -4    1.55    1.44
   2   2  -4    1.68    1.92
   2   2  -4    2.31    1.05
   2   2  -4    2.61    1.05
  -2  -2   4    1.75    1.05
   2  -4  -3    2.00    1.32
  -2  -4   3    1.33    0.54
   2   4  -3    1.34    1.77
   2  -4  -3    2.64    0.95
  -2  -4   3    2.37    0.91
  -2   4   3    1.88    0.67
  -2   4   3    0.49    1.10
  -2  -4   3    2.19    1.10
   2   4  -3    2.63    1.32
   2  -4  -3    2.13    1.60
  -2   4   3    2.35    1.67
   2   4  -3    2.44    0.97
   2  -4  -3    2.52    1.71
  -2   4   3    2.40    1.23
   1   0  -5  138.21    2.69
  -1   0   5  152.93    3.43
   1   0  -5  175.75    3.68
  -1   0   5  169.82    2.83
  -1   0   5  189.53    3.51
  -1   0   5  141.01    2.33
   1   0  -5  186.62    3.56
  -1   0   5  151.80    2.91
   2   1   3  252.67    4.68
  -2   1  -3  267.39    4.89
   2  -1   3  252.59    4.56
   2  -1   3  243.22    3.32
   2  -1   3  231.55    3.14
  -2   1  -3  255.03    3.42
   2   1   3  281.48    3.24
   2   1   3  257.14    3.12
  -2  -1  -3  248.36    3.09
   2   1   3  231.98    2.82
   2  -1   3  249.59    3.09
  -2  -1  -3  259.89    3.17
  -2   1  -3  247.90    3.50
  -2   1  -3  242.22    3.19
   0   0   5    0.03    1.90
   0   0  -5   -0.27    1.71
   0   0   5    0.16    1.16
   0   0   5    0.65    2.24
   0   0  -5   -0.07    1.48
   0   0   5    0.15    1.17
   3   0  -1  649.28    5.60
  -3   0   1  662.83    6.41
   3   0  -1  561.93    4.37
   3   0  -1  575.79    3.95
   3   0  -1  635.74    3.69
   3   0  -1  661.50    7.34
   1   1  -5    1.18    1.94
  -1  -1   5    2.14    1.84
   1  -1  -5    2.81    1.80
  -1   1   5    2.67    1.22
   1  -1  -5    2.27    1.33
  -1  -1   5    2.20    1.37
   1  -1  -5    2.12    1.39
  -1  -1   5    2.24    1.18
  -1  -1   5    1.89    1.81
  -1   1   5    1.49    1.56
   1  -1  -5    2.14    1.09
   1   1  -5    2.25    1.12
   1   1  -5    1.53    1.09
  -1   1   5    2.29    1.00
  -1   1   5    2.11    1.29
   0  -7  -1   10.99    1.12
   0   7  -1   14.20    1.21
   0   7   1   12.82    1.13
   0  -7  -1   12.86    1.39
   0   7  -1   11.70    1.36
   0   7  -1   10.72    1.78
   0   7   1   13.49    0.71
   0  -7   1   11.68    1.10
   0  -7   1   11.38    2.18
   0   7  -1   12.21    1.33
   0  -7   1   12.40    1.37
   0   7  -1   11.41    1.31
   0   7   1    8.92    1.77
   0  -7   1   10.88    1.84
   0   7   1   10.40    1.09
   0  -7  -1   13.71    1.56
   0   7   1   12.83    1.42
  -2   5   2  122.93    3.00
   2  -5  -2  137.41    2.86
  -2   5   2  106.76    2.45
   2   5  -2  129.81    1.88
  -2  -5   2  113.49    2.98
   2  -5  -2  127.29    3.06
  -2  -5   2  117.14    2.20
  -2  -5   2  148.43    2.41
   2   5  -2  126.24    2.47
   2  -5  -2  122.87    2.81
   2   5  -2  121.07    2.95
   2   5  -2  118.43    2.39
   0   1  -5   42.07    2.04
   0  -1   5   44.44    1.94
   0   1  -5   39.03    2.03
   0  -1  -5   39.32    1.95
   0   1   5   40.56    2.32
   0  -1   5   32.78    2.31
   0  -1   5   41.53    2.48
   0   1   5   40.22    1.70
   0  -1  -5   41.19    1.98
   0   1   5   45.80    1.97
   0  -1   5   41.41    1.86
   0   1  -5   41.16    2.02
   0   1   5   42.23    1.88
   3  -1  -1    1.07    0.69
   3  -1  -1    0.97    0.78
   3   1  -1    0.85    0.94
   3  -1  -1    1.58    1.09
  -3  -1   1    0.95    1.59
  -3  -1   1    1.37    0.67
   3  -1  -1    0.86    0.94
   3  -1  -1    1.08    1.84
  -3   1   1    0.93    0.67
   3   1  -1    1.21    1.24
   3   1  -1    1.15    0.40
   3  -1  -1    1.74    1.59
   3   1  -1    1.54    1.92
   3   1  -1    1.00    0.79
  -3   1   1    1.12    1.70
  -1  -3  -4  368.89    2.91
   1  -3   4  338.28    4.47
   1   3   4  341.06    2.88
  -1  -3  -4  369.88    3.31
   1   3   4  379.12    3.73
  -1  -3  -4  358.29    4.18
   1   3   4  395.83    4.53
  -1   3  -4  374.54    5.41
   1  -3   4  333.05    4.31
   1   3   4  377.07    4.35
   1  -3   4  344.72    4.20
   1  -3   4  317.08    4.45
   3   0   0    0.12    0.75
  -3   0   0    0.16    0.47
   3   0   0    0.13    0.87
   3   0   0   -0.29    1.61
  -3   0   0    0.25    1.77
  -2   4  -2   52.58    2.62
   2   4   2   55.59    1.53
   2  -4   2   47.83    2.50
   2  -4   2   44.46    1.87
  -2   4  -2   51.91    1.92
  -2   4  -2   51.24    1.73
   2  -4   2   43.64    1.67
   2   4   2   54.03    1.78
   2  -4   2   48.71    1.70
  -2  -4  -2   44.39    1.39
  -1   6  -2   41.46    2.32
   1   6   2   40.54    1.70
  -1   6  -2   42.14    1.93
  -1  -6  -2   38.02    0.73
   1  -6   2   41.22    2.26
  -1  -6  -2   41.04    1.71
  -1   6  -2   41.07    1.56
   1   6   2   41.00    1.87
  -1  -6  -2   44.54    1.70
  -1   6  -2   40.03    1.85
   1  -6   2   37.02    1.64
   1   6   2   40.62    1.58
   3   0  -2    0.10    0.70
  -3   0   2    0.07    0.62
   3   0  -2    0.28    0.85
   3   0  -2    0.16    1.02
  -3   0   2    0.20    0.72
   3   0  -2    0.10    1.84
   3   0  -2    0.23    1.39
  -3   0   2   -0.15    1.51
   1   5   3   37.64    1.61
  -1   5  -3   37.17    1.92
  -1  -5  -3   39.17    1.59
   1  -5   3   31.19    2.24
   1  -5   3   28.47    1.80
  -1   5  -3   36.98    1.63
   1  -5   3   37.51    1.81
  -1  -5  -3   41.88    1.89
   1   5   3   36.63    1.81
  -1   5  -3   37.76    2.29
   1   5   3   38.65    1.67
   1  -5   3   43.46    2.32
   1   5   3   31.67    0.53
   1   5   3   31.57    0.88
   2   5   1 1550.16    6.48
  -2   5  -1 1317.15    8.88
   2  -5   1 1362.27    8.54
   2   5   1 1409.35    6.57
  -2   5  -1 1336.78    9.22
   2   5   1 1437.64    7.54
  -2   5  -1 1446.58    8.67
   2  -5   1 1308.17    8.58
   2   5   1 1345.47    7.09
  -2   5  -1 1367.68    8.44
  -2  -5  -1 1480.51    6.79
   2  -5   1 1490.62    8.11
   2  -2   3   21.50    1.29
   2   2   3   24.32    2.51
   2  -2   3   21.77    1.33
  -2  -2  -3   24.63    1.20
  -2   2  -3   22.30    1.64
  -2   2  -3   23.61    2.37
   2  -2   3   22.40    1.49
  -2   2  -3   23.29    1.44
   2  -2   3   20.99    2.15
   2   2   3   25.87    1.24
  -2  -2  -3   19.99    1.08
   2   2   3   19.79    0.96
   2   2   3   25.43    1.24
   3  -1   0  114.49    2.86
   3   1   0  138.78    3.27
  -3   1   0  128.79    3.43
  -3  -1   0  131.37    3.33
  -3   1   0  105.02    1.83
   3   1   0  115.22    1.70
   3  -1   0  114.78    1.82
   3   1   0  109.21    3.18
   3   1   0  115.17    2.17
   3  -1   0  113.95    2.32
  -3   1   0  134.72    1.85
  -3  -1   2  496.90    3.65
   3   1  -2  648.95    4.70
  -3   1   2  416.43    3.94
   3  -1  -2  624.68    5.15
   3   1  -2  400.43    3.54
   3  -1  -2  512.61    4.03
   3  -1  -2  513.22    4.32
   3  -1  -2  452.87    4.28
   3   1  -2  562.22    6.33
   3  -1  -2  596.53    7.01
  -3  -1   2  483.74    3.66
   3   1  -2  462.95    3.50
  -3   1   2  596.66    5.48
  -3  -1   2  546.31    4.81
   3   1  -2  539.29    4.21
  -1  -2   5   60.65    2.03
   1  -2  -5   64.45    1.97
  -1   2   5   61.16    2.07
   1  -2  -5   84.05    2.73
   1   2  -5   67.16    2.40
  -1  -2   5   70.30    2.08
   1  -2  -5   71.36    2.22
  -1  -2   5   80.69    3.11
   1  -2  -5   74.53    2.31
  -1  -2   5   67.77    2.21
  -1   2   5   79.72    2.63
   1   2  -5   68.11    2.37
  -1   2   5   76.45    2.46
  -1   2   5   63.28    1.67
   0   6  -3  375.47    4.97
   0   6   3  342.87    4.64
   0   6   3  347.95    4.09
   0  -6  -3  298.62    2.49
   0  -6   3  353.46    4.39
   0   6  -3  320.89    4.14
   0  -6   3  350.44    4.56
   0  -6  -3  322.17    3.01
   0   6  -3  308.19    3.86
   0  -6  -3  329.88    4.22
   0  -6  -3  306.59    4.53
   0  -6  -3  351.32    4.31
   0   6   3  329.42    4.34
   0  -6   3  261.23    4.82
   0   6  -3  316.79    4.23
  -2   3   4   13.93    1.80
   2   3  -4   15.49    1.35
   2   3  -4   15.16    2.07
  -2   3   4   13.60    0.96
   2  -3  -4   16.86    1.32
  -2  -3   4   15.09    1.32
  -2   3   4   13.85    1.82
   2   3  -4   14.12    1.53
   2  -3  -4   12.12    1.52
  -2  -3   4   11.64    2.03
   2  -3  -4   14.64    1.85
  -2   3   4   14.06    1.36
  -2  -3   4   10.98    1.17
   2   3  -4    9.38    0.94
   2  -3  -4   10.49    1.50
   0   2   5    6.27    1.43
   0  -2   5    4.73    1.78
   0  -2   5    5.83    2.06
   0  -2  -5    4.69    1.41
   0  -2   5    5.17    1.52
   0  -2  -5    5.49    1.47
   0   2   5    5.56    1.09
   0   2   5    6.73    1.58
   0   2   5    6.32    1.24
   0   2   5    5.94    1.19
   0  -2   5    4.68    1.24
   0  -2  -5    6.35    1.54
   0   2  -5    4.42    1.27
   0  -2   5    6.49    1.30
  -3  -2   1  446.35    5.77
  -3   2   1  369.75    4.97
  -3  -2   1  334.16    2.72
   3   2  -1  445.26    4.65
   3  -2  -1  351.75    3.26
   3  -2  -1  407.02    5.10
   3   2  -1  342.63    4.89
   3  -2  -1  354.33    4.19
   3   2  -1  376.48    3.21
   3  -2  -1  333.83    3.85
   3  -2  -1  370.85    3.87
   3   2  -1  330.91    3.02
  -3   2   1  324.68    3.69
   1   7   0  113.22    2.37
   1   7   0  104.19    2.63
   1   7   0  115.93    2.49
   1   7   0   87.94    1.92
  -1   7   0   94.75    2.96
  -1   7   0   97.91    2.78
   1   7   0   97.34    2.55
   1  -7   0   96.35    2.45
  -1  -7   0  101.35    2.37
  -1  -7   0  106.41    2.13
   1  -7   0  104.09    2.41
  -1   7   0  108.10    1.94
   1  -7   0  103.43    2.17
  -1   7   0  103.64    2.42
   1   7   0   98.30    1.75
  -1  -7   0  106.82    2.20
  -1  -7   0  111.01    2.73
   1  -7   0  101.20    2.77
   1  -7  -1    5.02    1.11
   1   7  -1    5.79    1.13
  -1  -7   1    5.96    1.42
  -1  -7   1    5.66    0.94
   1   7  -1    3.55    1.41
  -1   7   1    7.97    1.87
   1   7  -1    6.20    2.04
   1  -7  -1    6.01    0.85
  -1   7   1    5.07    1.12
   1  -7  -1    4.76    1.35
   1  -7  -1    4.36    1.15
   1   7  -1    7.26    1.12
  -1  -7   1    5.08    1.67
  -1   7   1    5.55    1.45
   1  -7  -1    7.31    1.96
  -1   7   1    5.67    1.22
  -1  -7   1    4.67    1.39
   1   7  -1    5.03    1.04
   1   6  -3   82.75    2.34
  -1   6   3   88.96    2.37
  -1  -6   3   72.81    2.24
   1  -6  -3   76.29    1.96
  -1  -6   3   76.73    2.95
   1   6  -3   90.71    2.21
   1  -6  -3   73.97    1.88
   1  -6  -3   76.94    1.63
  -1  -6   3   87.04    2.62
   1  -6  -3   83.91    2.56
  -1  -6   3   72.98    2.01
   1   6  -3   90.88    2.62
   1  -6  -3   88.08    2.61
   1   6  -3   74.08    2.89
  -1   6   3   82.25    2.62
   3   2   0   69.89    2.57
   3  -2   0   74.41    2.06
   3   2   0   77.25    1.80
  -3   2   0   77.80    3.07
   3   2   0   70.69    2.74
   3  -2   0   71.52    1.69
   3  -2   0   73.34    2.69
   3  -2   0   69.26    2.04
   3   2   0   66.67    1.32
  -3   2   0   75.67    1.72
  -3   2   2  245.24    3.49
  -3  -2   2  337.56    4.36
  -3  -2   2  207.18    2.43
   3  -2  -2  270.15    3.56
   3   2  -2  221.20    2.55
  -3  -2   2  272.59    2.74
   3   2  -2  278.59    4.59
   3   2  -2  206.80    2.30
   3  -2  -2  292.37    3.15
   3  -2  -2  239.87    3.37
   3   2  -2  315.61    3.26
   3  -2  -2  296.38    3.83
   3   2  -2  273.86    3.19
  -3   2   2  300.85    4.21
  -3   2   2  265.37    3.54
   0   7  -2   69.24    2.52
   0  -7  -2   79.94    2.42
   0  -7   2   80.42    1.92
   0   7  -2   75.67    2.19
   0   7   2   75.88    2.42
   0  -7   2   69.57    2.43
   0   7   2   76.58    2.64
   0   7  -2   76.27    2.31
   0   7  -2   72.27    1.93
   0  -7   2   81.93    2.56
   0  -7  -2   58.95    1.11
   0  -7  -2   67.95    2.31
   0  -7   2   74.17    3.16
   0   7  -2   76.44    2.50
   0  -7  -2   73.59    1.75
   0  -7  -2   70.16    1.25
   0   7   2   77.34    2.11
   0   5   4  395.82    2.73
   0  -5   4  418.30    5.97
   0  -5   4  493.33    5.74
   0   5  -4  443.52    4.96
   0   5  -4  503.30    5.61
   0   5  -4  405.32    4.51
   0  -5   4  386.34    4.74
   0   5   4  415.29    2.76
   0  -5  -4  422.55    3.44
   0  -5  -4  418.04    5.14
   0   5  -4  474.67    5.56
   0   5   4  486.20    5.15
   0  -5   4  447.75    4.76
   0   5   4  453.45    5.11
  -1  -5   4    5.22    1.21
   1  -5  -4    8.27    0.99
   1   5  -4   11.93    1.57
  -1   5   4    8.01    0.79
  -1  -5   4   10.77    1.34
   1   5  -4    6.48    1.48
   1   5  -4    7.53    2.42
   1  -5  -4   10.02    1.40
   1  -5  -4    8.91    1.62
  -1   5   4    8.57    1.31
   1  -5  -4   10.18    1.56
  -1   5   4    8.20    1.40
   1   5  -4    9.45    1.37
   1  -5  -4    8.82    1.24
   2   3   3   16.96    0.94
   2   3   3   19.84    1.67
  -2   3  -3   16.51    1.59
   2  -3   3   14.47    2.02
   2  -3   3   16.00    1.30
  -2  -3  -3   18.26    1.04
   2   3   3   20.73    1.18
  -2   3  -3   17.62    2.22
  -2   3  -3   17.72    1.44
   2  -3   3   17.82    1.49
   2   3   3   23.76    3.27
  -2   3  -3   16.29    1.28
   2   3   3   18.19    1.12
   2  -3   3   15.34    1.31
  -3   0  -1  213.40    4.41
  -3   0  -1  210.55    2.15
   3   0   1  205.97    3.96
   3   0   1  197.78    3.00
  -1  -7  -1   17.26    1.05
  -1  -7  -1   14.75    1.50
  -1   7  -1   13.58    1.81
  -1  -7  -1   14.87    1.30
   1   7   1   12.37    1.53
  -1   7  -1   14.60    1.55
  -1  -7  -1   16.88    1.36
  -1  -7  -1   15.39    1.13
   1  -7   1   14.07    1.41
   1   7   1   16.85    1.23
  -1   7  -1   15.71    1.17
  -1   7  -1   15.37    1.33
   1   7   1   16.07    1.34
   1  -7   1   16.94    1.37
   1   7   1   15.57    0.87
   1   7   1   15.87    1.21
  -1   7  -1   18.19    1.76
   1  -7   1   14.99    1.29
   2  -5  -3  441.77    5.04
   2   5  -3  411.04    5.16
  -2  -5   3  407.60    5.87
   2  -5  -3  528.60    5.52
   2   5  -3  509.04    2.93
   2  -5  -3  465.34    3.92
  -2  -5   3  491.61    4.71
   2  -5  -3  511.95    5.82
   2   5  -3  426.89    4.50
  -2   5   3  512.00    5.28
   2   5  -3  540.79    5.69
  -2  -5   3  518.34    4.79
   2  -5  -3  503.97    5.79
  -2   5   3  468.37    5.55
  -1   3   5    3.58    1.21
   1   3  -5    2.16    1.62
   1  -3  -5    2.34    1.20
   1  -3  -5    3.49    1.72
   1  -3  -5    2.41    0.99
   1  -3  -5    3.16    1.49
   1   3  -5    2.56    1.16
  -1   3   5    2.55    0.81
  -1  -3   5    2.33    1.37
  -1  -3   5    2.37    1.27
  -1   3   5    2.52    1.35
  -1  -3   5    2.60    1.99
  -1   3   5    2.14    1.41
  -1   3   5    2.71    1.42
   1   3  -5    3.00    2.42
  -1  -3   5    2.66    1.20
  -2   6   1    5.09    1.14
   2   6  -1    5.24    1.40
  -2  -6   1    4.47    0.94
   2   6  -1    5.80    0.98
  -2  -6   1    5.06    1.54
  -2   6   1    4.96    1.38
   2   6  -1    4.83    1.15
   2  -6  -1    4.56    1.11
   2  -6  -1    5.24    1.77
   2   6  -1    5.34    1.15
   2  -6  -1    5.03    0.81
   2   6  -1    6.68    1.00
   2  -6  -1    5.72    1.52
  -2   6   1    4.89    1.79
  -3   0   3    2.32    1.27
   3   0  -3    1.44    1.19
   3   0  -3    1.57    1.12
  -3   0   3    0.68    1.69
   3   0  -3    1.73    0.82
  -3   0   3    1.93    0.92
   3   0  -3    1.80    0.99
   3   0  -3    2.04    1.83
  -3   0   3    2.27    0.92
   3  -1   1   81.91    2.69
   3  -1   1   79.70    1.91
  -3   1  -1   85.20    3.20
   3   1   1   93.54    3.25
   3  -1   1   79.56    2.09
   3   1   1   96.95    2.23
  -3  -1  -1   98.83    3.82
  -3  -1  -1   38.16    0.67
  -3   1  -1   78.66    1.77
   3   1   1   78.26    1.39
  -3   1  -1   78.52    2.17
  -3  -1  -1   38.85    0.76
  -3   1  -1   93.29    1.80
  -1   4  -4    9.20    1.92
   1   4   4   10.88    1.41
   1   4   4   11.26    1.30
   1  -4   4    8.57    1.24
   1  -4   4    8.63    1.65
  -1  -4  -4   11.80    1.16
  -1  -4  -4    9.46    1.08
   1  -4   4    8.28    1.77
   1   4   4   12.97    1.63
  -1   4  -4   10.37    1.31
  -1  -4  -4   10.10    0.65
   1  -4   4    9.74    1.60
   1   4   4   10.26    0.79
   1   4   4   14.21    1.82
   2  -6   0  679.32    6.46
   2  -6   0  778.07    7.07
  -2  -6   0  804.76    3.46
  -2  -6   0  795.35    6.68
   2   6   0  871.74    5.89
  -2   6   0  881.23    7.97
  -2   6   0  862.82    6.71
  -2   6   0  755.97    7.19
   2   6   0  942.83    5.95
   2   6   0  801.39    3.63
   2   6   0  909.18    4.03
   2  -6   0  732.56    6.64
   2  -6   0  779.11    5.41
   2   6   0 1068.28    6.05
   2   6   0  763.63    5.52
   0   3   5 1366.50    6.55
   0   3  -5 1754.67   11.27
   0  -3  -5 1528.51    7.54
   0   3   5 1519.23    8.16
   0   3   5 1385.76    8.09
   0   3  -5 1621.73   11.37
   0  -3  -5 1439.96    7.58
   0  -3   5 1433.20    9.06
   0  -3   5 1441.74   10.65
   0  -3  -5 1731.44    9.69
   0   3   5 1565.83    9.13
   0  -3   5 1357.17    9.47
   0  -3   5 1410.43    9.40
   0   3   5 1353.17    9.11
   3   3  -1   21.02    0.94
   3  -3  -1   22.10    1.86
  -3  -3   1   22.56    0.91
   3  -3  -1   23.71    1.13
   3   3  -1   20.51    1.74
   3   3  -1   21.87    1.14
   3  -3  -1   23.69    1.55
   3  -3  -1   21.02    1.29
  -3   3   1   20.47    1.34
   3  -3  -1   22.78    1.44
  -3   3   1   24.90    2.07
   3   3  -1   28.31    1.93
  -3   1   3    3.61    0.99
   3   1  -3    3.58    1.75
  -3  -1   3    3.55    1.22
  -3  -1   3    4.58    0.95
  -3   1   3    4.65    1.53
   3   1  -3    4.17    1.12
  -3  -1   3    4.63    2.04
   3   1  -3    3.46    0.86
  -3  -1   3    3.77    0.96
  -3  -1   3    4.07    0.84
   3  -1  -3    3.77    0.95
   3   1  -3    4.39    1.04
   3  -1  -3    4.95    1.35
  -3   1   3    3.85    1.08
   3   1  -3    3.10    1.03
   3  -1  -3    4.30    1.02
   3  -1  -3    3.00    1.29
   1  -7  -2  124.69    3.18
  -1   7   2   96.72    2.90
  -1  -7   2  117.35    2.53
  -1  -7   2  108.19    1.62
   1  -7  -2  119.69    2.46
   1  -7  -2  122.47    1.70
   1  -7  -2  130.31    2.96
  -1   7   2  115.36    3.07
  -1  -7   2  113.04    3.32
   1  -7  -2  114.91    1.83
   1   7  -2  105.86    2.49
   1   7  -2  128.81    2.49
   1   7  -2  125.76    3.23
  -1   7   2  118.97    2.55
  -1  -7   2  138.61    3.10
   1   7  -2  138.49    2.99
   1  -7  -2  118.56    3.04
   2   0  -5    1.39    1.33
  -2   0   5    0.15    0.93
  -2   0   5    0.25    1.15
   2   0  -5    0.18    1.82
  -2   0   5   -0.08    1.58
   2   0  -5    0.05    0.92
  -2   0   5   -0.18    1.17
   2   0  -5    0.21    1.26
  -2   0   5    0.50    1.09
   2   4  -4  689.69    5.65
   2  -4  -4  649.15    5.70
  -2   4   4  717.01    6.35
  -2  -4   4  672.79    5.56
   2  -4  -4  635.65    4.91
   2   4  -4  606.89    6.64
  -2   4   4  686.44    4.60
   2  -4  -4  583.35    5.97
  -2  -4   4  618.46    4.94
  -2  -4   4  710.83    6.08
   2  -4  -4  717.79    6.58
   2  -4  -4  750.54    7.06
   2   4  -4  748.38    6.67
   3   3   0 2236.58   11.35
  -3   3   0 1843.67    9.48
   3  -3   0 2028.51    8.69
   3  -3   0 2048.68   10.60
   3   3   0 2075.85   11.51
  -3   3   0 2131.92   11.84
   3  -3   0 1881.41    9.38
   3   3   0 1997.18    6.50
   3   3   0 2047.53    7.57
   3  -3   0 2008.60   10.00
  -3   3   0 2101.97    8.91
  -2  -5  -2  185.06    2.70
  -2   5  -2  204.93    4.02
  -2   5  -2  180.29    3.33
   2   5   2  175.19    3.06
   2   5   2  169.82    2.87
   2   5   2  200.51    2.94
   2  -5   2  160.99    3.18
  -2   5  -2  171.61    3.86
  -2   5  -2  144.52    3.20
   2   5   2  183.89    2.68
  -2   5  -2  172.15    2.82
   3  -3  -2 1277.53    7.88
   3   3  -2 1034.26    5.42
   3  -3  -2 1227.92    7.56
   3  -3  -2 1127.53    7.48
  -3   3   2 1159.47    7.33
  -3  -3   2  814.46    8.60
   3   3  -2 1040.00    5.00
  -3  -3   2 1247.51    5.79
   3  -3  -2 1077.53    7.41
  -3  -3   2  691.65    4.04
   3  -3  -2 1237.20    6.35
  -3   3   2 1030.98    7.19
   3   3  -2 1431.10    6.26
   3   3  -2 1176.33    8.44
   3   3  -2 1252.81    6.57
  -3   3   2 1369.71    9.04
   2  -1  -5  400.29    4.22
  -2  -1   5  407.37    3.21
   2  -1  -5  420.27    3.46
  -2  -1   5  380.82    4.52
   2  -1  -5  516.38    5.70
  -2  -1   5  409.28    5.72
   2   1  -5  494.80    5.61
   2   1  -5  391.81    4.09
  -2   1   5  426.03    5.58
   2  -1  -5  351.41    4.45
  -2   1   5  464.36    4.47
  -2   1   5  425.37    4.96
  -2  -1   5  466.85    5.52
  -2   1   5  441.57    4.10
   2   1  -5  460.17    4.75
  -2  -1   5  491.89    4.93
  -2   1   5  499.73    6.01
   2  -1  -5  489.47    5.97
  -3   2  -1 1092.40    6.22
   3   2   1 1109.74    8.60
   3  -2   1  977.29    6.36
   3  -2   1 1018.30    7.02
  -3   2  -1  947.97    6.46
   3   2   1 1094.74    5.88
  -3   2  -1 1054.15    7.46
   3   2   1  964.70    4.27
   3  -2   1  947.64    7.45
   2   6  -2  641.36    5.05
   2  -6  -2  656.92    6.50
   2   6  -2  645.43    6.11
  -2  -6   2  630.60    5.17
   2  -6  -2  506.45    5.07
  -2  -6   2  724.33    5.34
  -2  -6   2  586.82    6.26
   2   6  -2  741.83    6.08
  -2   6   2  636.60    5.67
   2  -6  -2  671.86    6.36
   2  -6  -2  784.94    6.82
   2  -6  -2  622.88    4.40
   2   6  -2  666.62    4.46
  -1   0  -5 1000.91    6.66
  -1   0  -5 1160.37    8.37
   1   0   5 1058.37    7.90
   1   0   5  945.29    6.79
   1   0   5  931.18    7.30
   1   0   5  891.50    7.15
   1   0   5  854.22    7.93
  -1   0  -5 1132.81    8.97
  -3   2   3   73.38    2.09
  -3  -2   3   85.65    1.97
   3  -2  -3   77.19    2.15
   3   2  -3   82.14    2.91
   3   2  -3   86.53    2.14
  -3   2   3   84.10    1.75
   3   2  -3   55.01    1.56
   3  -2  -3   76.42    2.38
  -3  -2   3   76.43    1.77
   3  -2  -3   79.36    2.28
   3   2  -3   63.51    1.67
   3   2  -3   75.23    1.43
   3  -2  -3   91.70    2.15
  -3   2   3   62.88    2.00
  -3   2   3   90.13    2.74
  -3  -2   3   85.79    1.88
  -3  -2   3   32.74    1.63
  -3  -2   3   88.41    3.29
   1   1   5   11.80    1.37
  -1  -1  -5   11.69    1.43
   1   1   5   13.42    2.24
  -1  -1  -5   12.01    1.32
   1   1   5   13.01    1.38
  -1   1  -5   12.10    1.33
   1   1   5   15.33    1.79
   1  -1   5   12.32    1.65
  -1   1  -5   12.01    1.50
   1  -1   5   11.48    2.16
  -1  -1  -5   12.09    1.17
   1  -1   5   11.11    2.10
   1  -1   5   11.52    1.41
  -1   1  -5   11.69    1.39
  -1   6  -3  208.79    3.72
   1  -6   3  207.13    3.59
  -1   6  -3  227.68    3.47
  -1   6  -3  214.60    3.98
  -1  -6  -3  291.77    4.22
   1   6   3  230.59    3.54
  -1  -6  -3  218.60    3.56
   1   6   3  263.99    3.83
   1   6   3  237.87    3.87
   1  -6   3  226.29    4.14
  -1  -6  -3  216.91    1.61
   1  -6   3  203.23    4.00
  -2   6  -1 2103.72    9.01
  -2   6  -1 2059.52   10.68
   2  -6   1 1937.09   10.60
  -2   6  -1 2067.18   12.38
   2   6   1 2356.84    8.66
  -2  -6  -1 2262.00    9.55
   2   6   1 2202.22    8.98
   2  -6   1 1947.97    9.52
  -2   6  -1 1912.22   10.37
  -2   6  -1 1933.48   11.41
   2   6   1 1987.70    8.59
   2  -6   1 1964.07   11.11
   2   6   1 2046.74    9.54
   0  -8   0   42.71    2.29
   0   8   0   47.17    1.73
   0   8   0   54.03    1.51
   0   8   0   47.71    1.60
   0  -8   0   57.28    2.08
   0  -8   0   50.36    2.33
   0   8   0   37.95    2.09
   0  -8   0   48.69    1.86
   0   8   0   47.12    2.09
  -2  -2   5  177.81    3.10
  -2  -2   5  154.13    1.71
  -2   2   5  261.72    4.42
  -2   2   5  232.74    4.22
   2   2  -5  231.02    3.53
  -2  -2   5  178.02    4.39
   2  -2  -5  261.15    4.11
   2  -2  -5  232.39    4.05
   2   2  -5  189.19    2.85
  -2   2   5  199.35    3.42
  -2  -2   5  236.30    3.66
   2   2  -5  189.25    3.60
   2   2  -5  180.24    4.00
   2  -2  -5  167.83    3.04
  -2   2   5  225.33    2.94
  -2   2   5  207.01    3.58
   2  -2  -5  220.11    2.88
  -2  -2   5  230.54    3.92
   2  -4   3  726.52    6.56
   2  -4   3  633.43    5.68
   2   4   3  739.32    4.30
   2  -4   3  725.59    6.45
  -2   4  -3  802.84    6.95
   2   4   3  725.71    2.90
   2   4   3  877.56    5.82
  -2  -4  -3  756.88    5.43
  -2   4  -3  743.81    5.78
   2   4   3  847.94    6.40
  -2   4  -3  793.52    8.21
  -1   7  -2  442.86    5.64
  -1   7  -2  516.60    5.39
  -1  -7  -2  559.67    2.92
   1   7   2  556.15    5.63
  -1  -7  -2  630.00    5.31
  -1  -7  -2  543.43    5.66
   1   7   2  565.60    4.75
  -1  -7  -2  562.85    5.32
  -1   7  -2  521.86    4.67
   1  -7   2  521.34    4.96
  -1   7  -2  519.95    5.89
  -1   7  -2  461.33    5.79
   1  -7   2  526.97    5.56
   1   7   2  512.03    5.46
   1  -7   2  466.38    5.32
  -2   0  -4  514.64    5.16
   2   0   4  508.50    4.84
   2   0   4  500.37    5.01
   2   0   4  506.78    6.52
  -2   0  -4  501.34    4.54
  -2   0  -4  523.08    5.07
  -1   4   5   91.06    2.54
  -1  -4   5   80.76    3.27
   1  -4  -5   97.44    2.73
   1  -4  -5  100.11    2.69
   1   4  -5   85.81    3.33
   1  -4  -5   86.93    2.20
   1  -4  -5  101.54    2.35
   1   4  -5  100.91    2.94
  -1   4   5  101.11    2.85
   1  -4  -5   90.74    2.62
  -1  -4   5   79.16    2.23
  -1  -4   5   89.80    2.76
  -1   4   5   97.22    2.79
   1   4  -5   87.10    3.08
  -1  -4   5   89.69    2.19
   1   4  -5   88.78    2.67
  -1   4   5   99.07    2.69
  -1   4   5   81.42    1.69
   0   8   1   35.08    1.57
   0  -8  -1   37.21    1.91
   0  -8  -1   39.17    1.64
   0   8   1   40.85    2.00
   0  -8  -1   43.18    1.91
   0  -8  -1   44.65    1.78
   0  -8   1   42.57    1.65
   0   8  -1   38.25    1.80
   0   8  -1   38.45    1.75
   0  -8  -1   38.41    2.22
   0   8   1   44.02    1.06
   0  -8   1   44.66    1.95
   0   8  -1   37.11    2.28
   0  -8   1   43.10    2.61
   0   8  -1   40.77    1.96
   0   8   1   43.57    1.63
   0   8   1   32.45    2.18
   0  -8   1   34.43    2.20
   0   8  -1   45.91    1.68
   0   4   5  479.89    3.59
   0   4   5  520.28    4.36
   0  -4  -5  507.83    5.82
   0   4  -5  580.72    6.62
   0   4   5  570.96    5.94
   0  -4   5  507.56    5.25
   0  -4   5  508.19    6.19
   0  -4   5  519.93    7.13
   0   4   5  587.42    6.03
   0   4  -5  449.61    5.72
   0  -4  -5  575.25    4.15
   0  -4  -5  556.91    4.69
   0  -4   5  555.83    5.96
   0   4  -5  534.16    5.61
   0   4  -5  505.04    5.48
   3  -4  -1  396.15    4.97
   3   4  -1  506.35    5.36
   3  -4  -1  336.22    4.23
   3   4  -1  370.21    3.21
  -3   4   1  359.21    4.58
   3   4  -1  359.86    4.78
   3   4  -1  226.58    2.04
   3  -4  -1  382.29    4.54
   3   4  -1  318.61    2.32
   3  -4  -1  401.01    3.65
  -3  -4   1  369.60    2.81
   3  -4  -1  371.04    4.53
   3   4  -1  341.03    2.34
  -3   4   1  449.47    5.97
   1  -2   5   25.49    2.28
   1  -2   5   24.32    2.32
  -1   2  -5   32.10    3.33
   1   2   5   27.13    1.82
  -1  -2  -5   26.00    1.60
  -1   2  -5   23.83    1.74
  -1  -2  -5   26.16    1.30
   1   2   5   26.87    2.27
   1   2   5   27.16    1.52
   1  -2   5   25.85    1.72
   1  -2   5   26.68    1.98
  -1  -2  -5   25.59    1.55
  -1   2  -5   25.03    1.61
  -1   2  -5   27.36    1.79
   1   2   5   26.75    1.65
   2   1   4    1.92    1.23
   2  -1   4    1.49    1.23
   2  -1   4    2.15    2.11
   2   1   4    2.02    2.18
   2  -1   4    1.52    1.02
  -2  -1  -4    1.73    0.96
   2  -1   4    1.97    1.06
  -2   1  -4    2.02    2.46
  -2  -1  -4    2.73    1.17
  -2  -1  -4    1.88    0.92
  -2   1  -4    1.63    0.97
   2   1   4    1.72    0.97
  -2   1  -4    1.28    1.05
   2   1   4    1.76    0.92
  -2   1  -4    1.57    1.29
   3  -3   1  500.51    5.37
  -3   3  -1  579.69    5.21
   3   3   1  603.95    6.71
   3  -3   1  516.01    5.92
   3   3   1  482.71    5.74
  -3   3  -1  443.25    4.71
   3   3   1  485.77    2.95
  -3   3  -1  537.82    5.62
   3  -3   1  471.97    4.50
   3   3   1  547.99    3.87
   0   7   3  286.74    4.26
   0   7  -3  278.89    4.35
   0   7   3  268.98    4.32
   0  -7   3  274.61    4.01
   0  -7  -3  311.27    4.34
   0  -7   3  276.78    4.46
   0  -7  -3  288.88    4.63
   0   7  -3  275.24    3.92
   0  -7  -3  287.60    3.05
   0  -7   3  290.92    5.19
   0   7  -3  286.55    3.86
   0  -7  -3  347.45    4.64
   0  -7  -3  274.80    2.53
   0   7   3  324.26    4.43
   0   7  -3  263.90    4.30
  -3   3   3    7.26    1.21
  -3  -3   3    8.53    1.08
   3   3  -3    6.42    1.02
   3  -3  -3    8.86    1.60
  -3   3   3    8.22    1.68
  -3   3   3    8.69    0.87
   3  -3  -3    8.72    1.07
   3  -3  -3    9.34    2.06
   3   3  -3    8.07    2.00
   3  -3  -3    9.29    1.65
   3  -3  -3    7.33    1.12
  -3   3   3    8.44    1.23
  -3  -3   3    9.28    1.01
   3   3  -3    7.82    0.99
   3   3  -3    8.02    1.28
   3   3  -3    7.59    0.71
   3   0   2    0.08    1.01
   3   0   2    0.00    0.74
   3   0   2   -0.54    2.09
  -3   0  -2    0.06    0.67
   3   0   2    0.49    0.72
  -3   0  -2   -0.18    1.09
   1   5   4  497.73    3.35
  -1   5  -4  478.12    6.24
  -1   5  -4  444.80    4.92
   1   5   4  403.16    2.30
  -1  -5  -4  520.05    5.68
   1   5   4  428.76    4.88
   1  -5   4  368.03    4.92
  -1   5  -4  424.67    5.16
   1  -5   4  394.71    5.06
  -1  -5  -4  445.07    4.99
   1   5   4  484.11    5.18
   1  -5   4  429.62    5.43
   1  -5   4  441.79    5.89
   1   5   4  444.77    4.76
   0   6  -4  534.18    5.91
   0   6  -4  451.68    4.91
   0  -6  -4  490.56    5.73
   0   6  -4  489.84    5.39
   0   6   4  511.06    5.28
   0  -6   4  488.43    5.64
   0  -6  -4  454.94    3.55
   0   6   4  515.57    5.81
   0  -6   4  448.50    4.77
   0  -6  -4  544.98    5.25
   0   6   4  513.49    5.62
   0  -6  -4  611.63    6.24
   0   6   4  437.82    2.88
   0   6  -4  420.50    5.73
  -3   4   0  256.54    3.47
   3  -4   0  260.77    3.93
   3  -4   0  283.69    4.61
   3   4   0  273.62    2.47
   3  -4   0  264.85    3.90
   3   4   0  280.59    4.41
   3   4  -2  145.36    2.33
   3  -4  -2  147.88    3.08
   3   4  -2   85.08    1.06
   3   4  -2  196.50    3.14
   3   4  -2  175.19    3.81
   3   4  -2  115.13    1.68
  -3   4   2  194.59    4.05
   3  -4  -2  172.69    3.27
  -3   4   2  150.53    3.11
   3   4  -2  170.02    2.67
   3  -4  -2  173.58    3.38
  -3  -4   2  221.21    2.49
  -3  -4   2  141.54    3.96
   3  -4  -2  167.21    3.09
   3  -4  -2  166.08    2.47
  -3  -4   2  170.13    2.36
   1   6  -4   84.02    2.68
   1  -6  -4   74.36    1.77
  -1   6   4   77.50    1.53
  -1   6   4   71.95    2.62
   1   6  -4   78.68    3.09
   1  -6  -4   97.18    2.77
  -1  -6   4   85.95    2.74
   1   6  -4   87.83    2.10
  -1  -6   4   74.87    1.99
  -1   6   4   93.21    2.77
   1  -6  -4   83.06    2.61
  -1  -6   4   82.54    2.33
   1  -6  -4   96.97    2.27
   1   6  -4   76.12    2.37
   3   1   2  199.01    4.20
   3  -1   2  167.15    2.62
   3  -1   2  178.37    2.52
  -3  -1  -2  156.42    1.99
   3  -1   2  187.08    3.15
  -3   1  -2  204.67    2.86
   3  -1   2  162.24    3.48
   3   1   2  195.18    2.20
  -3   1  -2  198.36    3.30
  -3  -1  -2  188.57    2.83
   3   1   2  176.17    2.57
   3   1   2  193.07    2.86
   3   0  -4    0.11    1.07
  -3   0   4   -0.05    1.80
   3   0  -4    0.40    1.20
  -3   0   4    0.69    0.98
   3   0  -4    0.01    1.14
  -3   0   4    0.25    1.21
   3   0  -4    0.13    0.87
  -3   0   4   -0.08    0.98
  -1   7   3   22.64    2.04
   1  -7  -3   23.83    1.90
   1  -7  -3   21.93    1.79
   1   7  -3   21.46    1.62
   1  -7  -3   21.94    1.10
   1  -7  -3   22.94    1.35
   1  -7  -3   23.35    1.54
   1  -7  -3   23.50    1.65
  -1   7   3   20.73    1.52
  -1  -7   3   24.05    1.88
   1  -7  -3   25.13    0.85
  -1  -7   3   20.39    1.66
  -1  -7   3   23.83    1.47
  -1  -7   3   20.18    2.09
  -1   7   3   20.19    1.76
   1   7  -3   27.54    1.73
   1   7  -3   23.72    1.66
   1   7  -3   21.10    2.40
  -2  -2  -4  123.44    2.54
   2   2   4  116.30    2.73
   2   2   4  130.49    2.61
   2  -2   4  115.40    2.55
   2   2   4  132.00    2.52
   2  -2   4  109.55    2.58
  -2   2  -4  139.20    4.29
   2   2   4  135.29    4.01
  -2   2  -4  126.01    2.96
   2  -2   4  119.66    2.81
  -2   2  -4  117.88    2.48
  -2  -2  -4  132.08    2.43
   2   2   4  121.91    2.39
  -2   2  -4  124.51    3.01
   2   6  -3    4.98    1.17
  -2  -6   3    4.12    1.04
   2  -6  -3    4.22    1.49
  -2  -6   3    3.54    1.84
   2   6  -3    4.14    1.40
   2  -6  -3    4.02    1.87
   2   6  -3    3.30    1.83
  -2  -6   3    3.89    1.27
   2   6  -3    4.19    1.01
   2  -6  -3    4.30    1.08
   2  -6  -3    3.85    1.13
   2  -6  -3    3.76    1.78
  -2   6   3    3.93    1.16
   2  -6  -3    4.08    0.92
   2  -3  -5  100.83    2.46
   2  -3  -5   93.75    2.61
   2   3  -5  102.44    3.32
  -2   3   5   98.92    1.99
  -2   3   5   97.98    3.19
   2   3  -5  103.97    2.76
  -2  -3   5  116.46    3.80
   2  -3  -5  106.82    2.79
   2  -3  -5  112.13    3.11
  -2  -3   5   87.76    2.54
  -2   3   5  110.90    2.86
   2  -3  -5  101.43    2.34
   2   3  -5  128.93    3.24
  -2  -3   5   83.63    2.35
   1  -8   0  253.04    3.95
  -1  -8   0  327.77    4.58
   1   8   0  237.44    3.82
  -1   8   0  295.01    4.79
   1   8   0  273.72    3.26
   1  -8   0  291.68    4.06
  -1  -8   0  290.16    3.78
  -1   8   0  281.10    3.10
   1  -8   0  273.90    3.53
   1   8   0  298.37    4.53
  -1   8   0  267.46    3.75
   1   8   0  284.72    3.25
  -1  -8   0  261.43    3.34
   1   8   0  275.00    3.81
  -1  -8   0  254.93    3.16
  -1   8   0  250.80    4.48
   1   8   0  259.21    2.93
  -3  -1   4    1.32    0.76
  -3   1   4    1.74    1.33
  -3  -1   4    1.97    1.06
   3  -1  -4    1.40    1.17
   3   1  -4    1.22    1.50
  -3   1   4    1.50    1.73
  -3  -1   4    0.93    1.79
   3   1  -4    1.29    1.92
   3   1  -4    1.46    0.93
  -3   1   4    1.18    1.08
   3   1  -4    1.88    1.17
  -3   1   4    1.81    1.12
   3   1  -4    1.21    0.75
   3  -1  -4    1.58    1.06
  -3   1   4    1.82    0.81
   3  -1  -4    2.11    1.30
   3  -1  -4    1.64    0.92
  -3  -1   4    1.38    1.03
   2   5  -4   77.71    2.43
  -2  -5   4   50.99    1.41
   2  -5  -4   77.66    1.95
   2   5  -4   69.91    2.89
  -2  -5   4   91.98    2.50
   2  -5  -4   86.17    2.69
   2  -5  -4   90.54    2.68
   2  -5  -4   82.05    2.58
  -2   5   4   85.44    2.81
  -2   5   4   74.27    1.60
  -2  -5   4   82.45    2.25
   2  -5  -4   87.53    2.70
  -2   5   4   84.87    2.54
   2   5  -4   70.22    2.32
   1   0  -6   -0.29    1.50
   1   0  -6    0.30    1.14
  -1   0   6    0.24    1.07
  -1   0   6   -0.02    1.10
  -1   0   6   -0.09    1.30
   1   0  -6   -1.98    2.17
  -1   0   6    0.39    1.20
   1   0  -6    0.21    1.09
  -1   0   6   -0.12    1.65
   1   8  -1  138.14    3.11
  -1   8   1  153.94    3.69
  -1  -8   1  145.84    2.93
  -1  -8   1  139.33    2.88
  -1  -8   1  140.99    3.28
   1  -8  -1  146.43    2.44
  -1   8   1  143.70    2.82
  -1   8   1  134.47    2.65
  -1   8   1  116.39    3.19
   1   8  -1  150.60    3.07
   1   8  -1  139.44    2.59
   1  -8  -1  139.91    3.44
   1   8  -1  139.58    2.89
   1  -8  -1  160.70    3.27
   1  -8  -1  133.33    2.76
   1   8  -1  123.70    2.78
  -1  -8   1  130.10    2.12
   1  -3   5   66.37    2.54
  -1  -3  -5   70.15    1.61
   1   3   5   67.39    2.49
  -1   3  -5   68.14    3.13
   1   3   5   68.57    1.70
   1  -3   5   64.78    2.90
   1  -3   5   66.32    2.27
  -1  -3  -5   69.44    2.21
   1  -3   5   68.37    2.85
   1   3   5   82.03    2.52
  -1   3  -5   64.92    2.42
   1   3   5   74.89    2.36
  -1  -3  -5   74.93    1.98
  -1   3  -5   66.63    2.43
   1  -1  -6  104.96    2.69
  -1  -1   6  107.41    2.85
  -1  -1   6  110.24    2.87
  -1   1   6  117.83    3.05
   1   1  -6  108.31    3.58
  -1   1   6  102.56    2.45
   1   1  -6  117.10    3.22
  -1  -1   6   91.47    3.31
  -1   1   6   95.12    2.42
  -1   1   6   87.13    2.98
   1  -1  -6  106.55    2.68
  -1  -1   6  103.90    2.64
   1  -1  -6  106.00    3.23
   1  -1  -6  104.01    2.85
  -1  -1   6   92.00    2.82
   2   7  -1  269.59    3.55
   2  -7  -1  242.22    3.01
   2   7  -1  314.23    3.92
   2   7  -1  279.72    3.08
  -2  -7   1  281.97    3.16
   2  -7  -1  251.53    4.34
   2  -7  -1  231.96    4.28
  -2   7   1  240.19    3.64
   2  -7  -1  269.92    4.39
   2   7  -1  251.87    3.82
   2   7  -1  277.73    3.75
  -2   7   1  253.52    4.46
  -2  -7   1  221.79    3.97
   3  -2   2    5.57    0.91
   3  -2   2    5.72    1.90
  -3   2  -2    6.30    1.06
   3   2   2    6.85    0.61
  -3  -2  -2    4.40    0.51
  -3   2  -2    6.79    1.37
  -3   2  -2    6.97    1.05
   3   2   2    5.75    0.79
   3   2   2    5.62    2.18
   3  -2   2    6.80    1.22
   3   2   2    7.75    1.00
   0  -8  -2  224.09    4.15
   0  -8  -2  218.61    2.19
   0   8   2  228.58    4.19
   0  -8   2  228.56    4.58
   0  -8  -2  258.42    4.07
   0  -8  -2  266.05    2.27
   0  -8   2  220.24    4.07
   0   8   2  243.67    4.19
   0  -8   2  250.87    3.22
   0   8  -2  259.58    4.51
   0   8  -2  233.76    4.23
   0   8  -2  232.54    3.32
   0  -8   2  258.91    4.23
   0   8   2  217.75    3.42
   0   8  -2  257.61    4.30
   0  -8  -2  231.54    3.08
   0   8  -2  224.67    3.59
  -2   7   0   53.65    2.11
   2   7   0   53.53    2.01
  -2  -7   0   55.19    2.30
   2   7   0   63.71    1.24
   2   7   0   59.12    1.87
  -2   7   0   53.22    2.43
  -2  -7   0   52.07    1.16
   2   7   0   64.82    1.86
   2   7   0   60.98    1.36
   2  -7   0   49.82    1.66
  -2   7   0   50.94    2.52
   2  -7   0   49.78    2.51
   2   7   0   50.95    1.93
   0   0   6 2331.37   10.82
   0   0  -6 2386.17   11.52
   0   0   6 2578.59   12.71
   0   0  -6 2369.29   11.24
   0   0   6 2366.43   13.28
   0   0   6 2515.54   14.48
   2   6   2 1611.93    8.02
  -2   6  -2 1465.48    8.02
  -2   6  -2 1271.99    9.67
   2  -6   2 1309.80    9.09
  -2   6  -2 1425.65   10.33
   2   6   2 1396.26    6.74
  -2   6  -2 1500.59    9.67
   2   6   2 1405.63    8.33
   2   6   2 1484.75    7.30
  -2   6  -2 1365.53    9.20
  -2  -6  -2 1505.33    8.28
   3   2  -4    9.09    1.33
   3  -2  -4    9.70    1.97
  -3   2   4    8.32    0.89
   3  -2  -4    6.65    1.35
   3  -2  -4    6.87    1.11
  -3   2   4    8.11    1.56
  -3   2   4    6.88    1.25
   3   2  -4    6.15    1.06
  -3   2   4    6.07    1.23
   3  -2  -4    8.11    1.45
  -3  -2   4    9.79    1.12
   3  -2  -4    8.08    1.09
  -3  -2   4    8.86    1.08
   3   2  -4    9.46    1.99
  -3  -2   4    8.10    1.04
  -3  -2   4    9.00    1.91
   3   2  -4    7.90    1.14
  -1   8  -1  376.64    3.80
  -1   8  -1  342.13    5.14
   1  -8   1  354.42    4.76
  -1   8  -1  370.67    4.58
   1  -8   1  331.57    4.75
   1   8   1  343.25    2.95
  -1   8  -1  351.54    4.76
   1   8   1  342.48    2.63
   1   8   1  359.04    4.83
   1   8   1  363.97    3.65
  -1  -8  -1  365.35    5.00
   1   8   1  389.57    4.84
  -1  -8  -1  375.33    3.37
   1  -8   1  362.45    4.30
  -1   8  -1  387.51    5.44
  -1  -8  -1  384.80    3.37
   1  -8   1  331.99    4.10
  -1  -8  -1  380.88    3.99
  -1  -8  -1  406.51    4.90
   0   1  -6   15.59    1.79
   0  -1   6   17.44    1.62
   0   1   6   19.90    3.27
   0   1   6   15.03    1.37
   0  -1  -6   16.52    1.85
   0   1  -6   15.55    1.56
   0  -1   6   17.93    2.22
   0  -1   6   16.20    1.67
   0   1   6   17.15    2.09
   0  -1  -6   17.17    1.49
   0   1   6   18.22    1.59
   0  -1   6   14.26    2.18
   0   1   6   16.51    1.72
  -2   5  -3   74.48    2.49
   2  -5   3   74.49    2.48
  -2   5  -3   75.05    2.07
   2   5   3   73.28    2.19
   2   5   3   81.80    2.21
   2  -5   3   76.36    2.34
   2   5   3   92.74    2.20
   2  -5   3   56.03    2.12
   2   5   3   75.43    1.39
  -2   5  -3   82.78    3.37
  -2  -5  -3   81.92    2.11
   3  -4   1   19.09    2.19
  -3   4  -1   21.02    1.38
   3   4   1   23.35    2.44
   3  -4   1   19.12    1.21
  -3   4  -1   14.99    1.45
  -3   4  -1   19.69    1.66
   3   4   1   19.29    2.09
   3   4   1   18.79    0.83
   3   4   1   21.64    0.98
   3  -4   1   18.90    1.49
   1  -2  -6   76.92    2.56
   1  -2  -6   86.01    2.72
  -1  -2   6   76.49    3.23
  -1   2   6   66.65    1.87
  -1   2   6   85.77    2.57
   1   2  -6   70.27    3.23
   1  -2  -6   72.81    2.27
   1  -2  -6   86.75    2.98
  -1  -2   6   54.16    2.31
  -1  -2   6   70.45    2.40
  -1   2   6   74.93    2.75
  -1   2   6   82.37    2.67
   1   2  -6   77.36    2.67
  -1  -2   6   76.92    2.48
   2   3   4  207.04    2.89
  -2   3  -4  203.37    4.78
   2   3   4  233.76    5.67
   2   3   4  231.42    3.46
   2  -3   4  164.64    3.07
  -2  -3  -4  221.97    2.76
   2  -3   4  185.75    3.61
   2   3   4  196.66    2.54
  -2   3  -4  193.63    3.73
   2  -3   4  171.45    3.25
   2   3   4  237.80    4.14
  -2   3  -4  226.67    4.32
  -2  -3  -4  190.85    3.07
  -1   5   5    7.64    1.44
   1   5  -5    7.52    1.39
  -1  -5   5    8.43    2.06
   1  -5  -5    9.98    1.77
  -1  -5   5    6.26    1.34
   1  -5  -5    6.79    1.15
  -1   5   5    5.93    1.68
   1   5  -5    6.10    1.52
   1  -5  -5    7.41    1.46
   1  -5  -5    8.52    1.59
   1   5  -5    5.70    1.47
  -1   5   5    6.82    1.50
   1   5  -5    7.59    2.43
   1  -5  -5    7.93    1.26
  -1   5   5    6.45    0.78
  -1   5   5    6.61    1.33
  -1  -5   5    7.41    1.35
  -1  -5   5    6.44    1.27
   3  -4  -3   11.47    1.84
   3   4  -3    2.14    0.42
  -3   4   3    9.99    1.30
   3  -4  -3   11.28    1.09
  -3  -4   3    6.38    1.94
   3   4  -3    8.56    1.03
   3   4  -3    5.67    0.57
  -3  -4   3   11.72    1.13
   3  -4  -3   11.66    1.71
   3  -4  -3   11.49    2.19
   3   4  -3    8.09    0.73
   3   4  -3    8.68    1.90
   3  -4  -3    9.05    1.33
   3   4  -3   10.36    1.32
  -3   4   3    9.72    1.37
  -3   4   3   12.49    2.27
  -3  -4   3   12.55    1.03
   2   7  -2  633.59    5.92
   2  -7  -2  618.07    6.49
  -2   7   2  613.59    5.90
   2   7  -2  550.10    5.88
  -2  -7   2  582.56    4.95
  -2  -7   2  560.71    6.38
   2   7  -2  585.73    4.60
   2   7  -2  670.64    6.24
   2  -7  -2  558.22    4.32
   2  -7  -2  524.23    6.15
   2  -7  -2  542.49    5.45
  -2  -7   2  449.25    3.98
   2  -7  -2  578.08    4.30
   2   7  -2  586.59    4.92
   0  -5   5   25.96    2.14
   0   5   5   38.12    2.46
   0  -5  -5   21.24    0.93
   0   5  -5   32.42    2.10
   0   5  -5   23.79    1.58
   0  -5   5   22.27    1.93
   0   5  -5   28.22    1.95
   0   5   5   28.14    1.70
   0  -5  -5   27.18    1.45
   0  -5   5   25.91    1.66
   0  -5   5   28.14    2.64
   0   5  -5   26.79    2.19
   0   5   5   25.10    1.00
   0   5   5   24.84    1.31
   0  -5  -5   26.55    1.64
  -1  -8   2   88.29    1.79
  -1  -8   2  103.45    2.70
   1  -8  -2  104.99    2.80
   1  -8  -2   92.05    2.79
   1   8  -2   98.69    2.78
  -1   8   2   94.52    2.43
   1  -8  -2  103.78    1.80
  -1   8   2   85.07    2.95
   1  -8  -2  110.59    2.78
   1   8  -2   93.94    2.75
   1  -8  -2   92.91    1.75
   1   8  -2  100.59    2.39
   1  -8  -2  103.64    3.28
   1   8  -2  107.70    2.77
  -1  -8   2  113.04    3.02
  -1   8   2   94.60    3.11
   1   8  -2  102.97    2.79
  -1  -8   2   98.17    3.24
   3  -5  -1   18.76    1.17
   3   5  -1   25.31    2.38
  -3  -5   1   19.95    0.91
   3   5  -1    4.01    0.48
  -3   5   1   19.47    2.17
   3  -5  -1   16.90    1.50
   3   5  -1   13.93    0.52
   3  -5  -1   15.76    1.45
   3   5  -1   13.68    0.84
  -3  -5   1   12.90    1.85
   3  -5  -1   20.47    1.18
   3   5  -1   18.33    1.14
   3  -5  -1   16.96    1.90
   3   5  -1   17.92    1.68
   3   5  -1   21.39    1.31
  -3   5   1   15.09    1.51
   3   5  -1   19.54    0.89
   3  -5  -1   17.07    1.47
   0  -2   6    1.75    2.06
   0   2   6    1.49    1.14
   0   2   6    2.37    1.41
   0  -2   6    1.04    1.49
   0   2   6    1.29    1.09
   0   2  -6    1.84    1.31
   0  -2   6    1.70    1.84
   0  -2  -6    1.45    1.48
   0  -2   6    1.26    1.22
   0  -2  -6    1.77    1.17
   0   2   6    0.80    1.57
   0  -2   6    1.12    1.39
   0   2   6    0.78    1.21
   0   2  -6    0.73    1.46
   0   2  -6    1.24    1.26
  -2  -4   5   58.34    3.23
  -2   4   5   67.63    2.62
  -2  -4   5   41.28    1.62
   2  -4  -5   82.03    2.55
   2   4  -5   66.16    2.93
  -2   4   5   60.65    2.57
   2  -4  -5   56.72    2.41
   2   4  -5   59.62    2.31
  -2   4   5   57.64    1.55
   2  -4  -5   62.09    1.99
  -2  -4   5   72.20    2.39
   2  -4  -5   68.19    2.43
   2  -4  -5   73.04    2.89
   2   4  -5   63.16    2.34
  -1  -7  -3  545.44    2.79
  -1   7  -3  526.97    5.86
   1  -7   3  505.46    6.16
  -1   7  -3  556.65    5.40
   1   7   3  533.48    5.65
   1   7   3  569.96    5.28
  -1  -7  -3  726.15    6.46
   1  -7   3  378.14    4.81
  -1   7  -3  505.25    6.14
  -1   7  -3  543.35    6.37
  -1  -7  -3  554.57    6.12
   1   7   3  598.39    5.96
   1  -7   3  514.17    5.92
  -2   7  -1 1015.11    6.52
   2  -7   1  871.66    6.66
  -2   7  -1  976.82    7.64
   2   7   1  925.92    6.05
  -2   7  -1  937.56    8.41
  -2  -7  -1 1110.25    7.58
   2   7   1 1035.47    5.39
  -2   7  -1  834.51    8.03
  -2   7  -1  835.95    7.33
   2   7   1  915.15    6.87
   2   7   1 1108.70    7.21
  -3   3  -2   86.44    2.47
  -3  -3  -2   76.31    1.26
  -3   3  -2  106.27    2.53
   3  -3   2   88.98    2.97
   3   3   2  108.78    1.87
   3   3   2  102.25    3.36
   3  -3   2   91.72    2.19
   3  -3   2   91.27    2.58
   3   3   2  130.98    1.62
   3   3   2   91.63    1.90
  -3   3  -2  101.26    2.76
   3   3   2  101.56    1.43
   3   5   0  139.94    1.65
   3  -5   0  155.75    3.17
   3   5   0  102.50    1.39
  -3  -5   0  164.34    1.61
  -3   5   0  158.00    2.96
   3   5   0  173.18    2.08
  -3   5   0  149.73    3.36
   3   5   0  157.91    3.33
   3   5   0  224.69    4.73
   3  -5   0  165.98    3.69
  -3   5   0  160.48    3.32
   3  -5   0  149.66    3.13
   3   5   0   99.84    1.64
   3  -5  -2  806.81    5.49
  -3   5   2  706.71    6.87
   3   5  -2  771.61    5.33
   3   5  -2  882.93    6.27
  -3  -5   2  841.26    5.03
   3  -5  -2  713.71    6.55
   3  -5  -2  729.94    6.42
   3   5  -2  732.84    5.43
  -3  -5   2  540.04    7.10
   3   5  -2  669.82    6.81
   3   5  -2  576.76    4.03
  -3  -5   2  737.85    4.74
   3  -5  -2  634.79    6.22
  -3   5   2  826.29    7.90
   3  -5  -2  746.62    6.40
  -3   3   4  618.16    5.91
   3   3  -4  637.33    6.12
   3  -3  -4  620.75    5.98
  -3  -3   4  607.11    4.20
  -3   3   4  883.75    6.85
   3  -3  -4  738.56    6.05
  -3  -3   4  795.36    5.91
   3  -3  -4  767.71    5.76
  -3   3   4  759.89    5.11
   3  -3  -4  790.16    7.22
   3   3  -4  734.86    7.26
   3  -3  -4  801.23    7.85
  -3  -3   4  927.40    6.89
   3   3  -4  525.31    4.00
  -3  -3   4  684.55    8.20
   3   3  -4  738.10    5.77
  -3   3   4  670.31    6.51
   1  -4   5   18.16    1.83
  -1  -4  -5   18.42    0.94
   1   4   5   18.47    1.62
   1  -4   5   15.52    1.40
  -1   4  -5   18.08    2.30
   1  -4   5   17.69    2.37
  -1  -4  -5   19.80    1.52
  -1  -4  -5   20.98    1.45
   1   4   5   18.80    1.49
   1   4   5   16.87    1.08
   1   4   5   19.05    1.78
   1  -4   5   17.32    1.98
  -1   6  -4  271.30    4.35
  -1  -6  -4  276.30    4.25
   1  -6   4  206.26    4.65
   1   6   4  297.71    4.18
  -1   6  -4  265.92    3.90
  -1  -6  -4  382.51    5.21
   1  -6   4  262.11    4.57
   1  -6   4  254.77    4.30
   1   6   4  261.39    1.68
   1  -6   4  212.65    3.81
  -1   6  -4  287.98    5.28
   1   6   4  295.30    4.52
   1   6   4  285.88    4.06
  -1  -3   6 1035.44    8.08
  -1   3   6 1009.87    7.61
  -1   3   6  936.81    6.09
   1  -3  -6 1162.55    8.35
   1  -3  -6 1068.65    9.06
   1   3  -6 1055.41    8.33
   1   3  -6 1026.33    9.05
   1  -3  -6  974.52    6.95
  -1  -3   6  873.76    9.40
  -1  -3   6 1100.07    7.39
  -1   3   6  977.94    7.70
  -1   3   6  993.19    8.61
   1  -3  -6 1136.28    8.02
  -1  -3   6  888.83    7.30
  -1   3   6 1201.53    9.45
  -2   0   6  675.39    7.63
  -2   0   6  671.33    6.96
  -2   0   6  643.15    6.56
  -2   0   6  699.01    5.23
   2   0  -6  711.63    7.04
  -2   0   6  744.55    6.01
   2   0  -6  715.60    6.32
   2   0  -6  784.52    7.92
   2   0  -6  645.44    5.95
   1  -8   2   10.11    2.00
  -1  -8  -2   11.05    1.31
  -1   8  -2   10.92    2.05
  -1   8  -2   10.83    1.55
   1  -8   2   10.13    1.33
  -1   8  -2    9.58    1.44
  -1  -8  -2   12.70    1.68
   1  -8   2   10.85    1.56
   1   8   2   12.18    1.34
   1   8   2   10.48    1.42
   1  -8   2   11.35    1.57
  -1   8  -2    9.73    1.51
  -1   8  -2   11.45    1.18
   1   8   2   10.46    1.77
  -1  -8  -2    8.92    0.80
  -1  -8  -2   14.36    1.54
   0  -9   0    0.11    1.65
   0  -9   0   -0.29    1.37
   0  -9   0   -0.33    1.83
   0   9   0    0.06    0.94
   0   9   0    0.26    1.14
   0   9   0    0.17    1.53
   0   9   0   -0.17    0.98
   0   9   0   -0.11    0.81
   0  -9   0   -0.13    1.19
   0   9   0   -0.60    1.31
   2   6  -4 1376.70    9.96
   2  -6  -4 1604.14   10.12
  -2   6   4 1539.62   10.31
   2   6  -4  964.97    4.53
  -2  -6   4 1628.03    9.52
  -2  -6   4 1339.00   11.53
   2  -6  -4 1627.19    9.94
   2   6  -4 1535.16    8.92
   2   6  -4 1382.65   10.00
   2  -6  -4 1641.69    9.62
   2  -6  -4 1492.33    7.52
   2  -6  -4 1593.91   10.70
  -2  -6   4 1604.36    9.38
  -2   6   4 1671.77   10.10
  -2  -6   4 1012.50    4.76
   0  -7  -4   72.86    2.55
   0   7   4   63.42    2.33
   0   7   4   64.50    2.62
   0   7  -4   55.58    2.04
   0  -7   4   54.68    3.01
   0  -7  -4   63.06    1.59
   0  -7   4   58.98    2.42
   0   7  -4   65.27    2.62
   0   7   4   60.32    2.15
   0  -7  -4   60.79    2.31
   0  -7  -4   79.15    2.61
   0   7  -4   50.84    2.48
   0   7  -4   60.11    2.27
  -2  -1   6   10.85    1.51
   2  -1  -6   16.40    1.53
   2   1  -6   20.35    1.63
  -2   1   6   14.10    1.62
   2  -1  -6   19.32    1.53
  -2   1   6   20.28    1.79
  -2   1   6   18.22    1.58
  -2   1   6   16.19    2.01
  -2  -1   6   17.89    1.69
  -2  -1   6   17.68    1.29
   2  -1  -6   20.20    2.05
   2   1  -6   19.33    2.23
  -2  -1   6   13.72    2.13
   2   1  -6   12.28    1.39
  -2  -1   6   15.31    2.03
  -2   1   6   16.71    1.33
   2   1  -6   17.61    1.64
  -2  -1   6   20.84    1.51
   0   3   6  112.26    2.98
   0   3   6  118.69    3.03
   0  -3   6  105.77    2.81
   0   3   6  112.45    2.29
   0  -3  -6  116.17    2.76
   0  -3  -6  126.91    2.57
   0  -3   6  104.02    3.62
   0   3   6  116.53    2.80
   0  -3   6  120.99    3.21
   0  -3   6  117.60    3.05
   0   3   6  115.75    2.98
   0   3  -6  116.74    3.53
   0  -3   6  116.37    3.25
   0  -3  -6  109.82    2.96
  -2   4  -4  306.52    4.70
   2   4   4  387.37    4.63
  -2  -4  -4  303.88    3.85
  -2   4  -4  288.89    4.58
   2   4   4  375.61    7.24
   2   4   4  336.62    3.45
   2  -4   4  285.10    4.19
  -2   4  -4  317.47    5.83
   2  -4   4  308.93    4.50
   2  -4   4  360.32    5.45
  -2   4  -4  289.16    3.88
   2   4   4  344.55    4.58
   2   4   4  305.01    2.47
   3   0   3    0.39    0.79
   3   0   3   -0.39    2.18
   3   0   3    0.32    1.08
  -3   0  -3   -0.23    1.18
   3   0   3    0.33    0.87
  -3   0  -3    0.25    0.81
   1  -7  -4   14.93    1.14
   1  -7  -4   20.42    2.03
  -1   7   4   14.68    1.63
   1  -7  -4   15.61    1.58
  -1   7   4   17.80    1.76
   1   7  -4   16.64    1.63
   1  -7  -4   20.17    1.45
   1  -7  -4   14.75    1.21
  -1  -7   4   17.15    1.91
   1   7  -4   11.70    2.24
   1   7  -4   13.45    1.55
  -1  -7   4   14.47    1.55
  -1  -7   4   15.41    1.46
   1   7  -4   16.97    1.71
  -1  -7   4   13.68    2.19
   0  -8   3   16.58    1.87
   0   8  -3   15.40    1.55
   0   8   3   15.54    2.02
   0   8   3   18.49    1.67
   0  -8   3   16.67    2.44
   0   8  -3   16.50    1.88
   0  -8   3   13.20    1.86
   0   8  -3   16.47    1.49
   0   8   3   16.90    1.56
   0  -8  -3   15.83    1.55
   0  -8  -3   15.12    0.91
   0  -8  -3   17.28    1.73
   0   8  -3   14.39    1.36
   0  -8  -3   16.20    1.16
  -2  -7   3   48.45    1.44
   2   7  -3   58.82    2.71
   2  -7  -3   70.43    2.71
  -2  -7   3   71.12    2.32
   2  -7  -3   71.29    2.79
   2  -7  -3   64.24    1.70
   2   7  -3   58.68    2.19
   2  -7  -3   62.43    2.10
  -2  -7   3   64.60    2.99
  -2   7   3   67.19    2.24
  -2  -7   3   68.09    2.05
   2  -7  -3   70.33    2.61
   2   7  -3   70.55    1.96
   2   7  -3   61.80    2.13
  -3  -1  -3   76.86    1.86
   3   1   3   80.85    3.32
  -3   1  -3   77.25    2.06
   3   1   3   89.12    1.97
   3   1   3   71.74    1.81
   3  -1   3   68.40    1.90
  -3  -1  -3   84.21    2.16
  -3   1  -3   83.97    2.50
   3  -1   3   77.18    2.04
   3  -1   3   78.02    3.28
   3  -1   3   74.97    2.24
   3   1   3   80.74    2.11
   3   5   1   16.86    0.78
  -3   5  -1   22.53    1.70
  -3   5  -1   23.26    1.52
   3   5   1   23.69    1.23
   3   5   1   28.16    0.90
   3   5   1   23.24    0.84
   3  -5   1   24.50    1.65
   3  -5   1   29.11    2.63
   3  -5   1   22.68    1.65
   3   5   1   33.70    0.92
   3   5   1   35.01    3.09
   3   5   1   22.02    1.96
   0  -9  -1    8.77    1.43
   0  -9  -1   10.97    1.53
   0   9  -1   11.12    1.17
   0   9  -1    7.81    1.28
   0  -9   1   11.45    1.61
   0  -9   1    7.81    1.22
   0   9  -1    8.89    1.46
   0  -9   1    9.39    2.05
   0   9   1    9.49    1.26
   0  -9  -1    8.11    1.38
   0   9  -1    9.11    1.38
   0  -9  -1    9.00    1.25
   0   9   1    9.62    1.49
   0   9   1   11.57    0.83
   0   9  -1    8.54    1.77
   0   9   1    6.13    1.77
   0  -9   1    8.42    1.87
   0   9   1    7.23    1.18
   0  -9  -1    8.51    1.78
   3   0  -5    0.21    0.91
  -3   0   5    0.52    1.08
  -3   0   5    0.23    1.35
   3   0  -5    0.24    1.21
  -3   0   5    0.31    1.75
  -3   0   5    0.05    0.91
   3   0  -5    0.12    0.95
   3   0  -5    0.39    1.22
  -3   0   5    0.21    1.15
  -3  -5   3   54.59    2.86
  -3  -5   3   76.92    1.90
   3   5  -3   33.18    1.27
  -3   5   3   67.51    2.45
   3   5  -3   71.70    2.18
   3   5  -3   58.76    2.58
   3  -5  -3   69.29    2.39
   3  -5  -3   77.63    3.35
  -3  -5   3   69.33    1.90
   3  -5  -3   77.48    2.83
   3   5  -3   41.53    0.89
   3  -5  -3   67.00    2.24
   3   5  -3   61.69    2.03
   3  -5  -3   73.17    2.68
  -3   5   3   67.11    2.85
  -3   4  -2    9.98    1.38
   3  -4   2   12.08    1.47
   3   4   2   10.54    1.86
  -3   4  -2   12.69    2.50
   3  -4   2   11.53    2.17
  -3   4  -2   12.07    1.58
   3   4   2   10.30    0.61
   3   4   2   13.23    1.22
   3   4   2   12.14    0.76
  -3   4  -2   10.92    1.22
   3  -4   2   10.70    1.14
  -3  -4  -2   11.53    0.71
   3   4   2   12.63    0.74
   3   4   2   13.99    2.39
   1  -8  -3  671.74    7.46
  -1   8   3  749.20    7.64
   1   8  -3  671.60    5.85
  -1  -8   3  582.99    5.55
   1  -8  -3  709.38    6.89
   1   8  -3  675.41    6.02
   1   8  -3  640.21    6.92
   1  -8  -3  730.98    5.48
  -1   8   3  713.77    6.60
  -1  -8   3  646.71    7.38
  -1   8   3  696.48    7.50
  -1  -8   3  684.46    6.40
   1  -8  -3  682.68    5.65
   1  -8  -3  655.25    4.40
  -1  -8   3  748.17    7.13
   1  -8  -3  704.80    3.74
  -1  -8   3  636.24    4.36
   1  -8  -3  749.27    7.00
   1   8  -3  615.41    6.09
  -2  -2   6    5.12    1.30
   2  -2  -6    6.19    1.51
   2   2  -6    5.32    1.51
   2   2  -6    6.15    1.33
  -2  -2   6    5.77    2.08
   2  -2  -6    5.36    1.37
  -2  -2   6    4.62    1.59
  -2   2   6    5.20    0.98
  -2  -2   6    5.31    1.26
  -2   2   6    6.08    1.33
  -2  -2   6    4.96    0.91
  -2   2   6    3.80    1.70
  -2   2   6    5.55    1.48
  -2   2   6    6.39    1.58
   2  -2  -6    5.11    1.27
   2   2  -6    3.89    1.10
   2  -2  -6    6.48    1.94
   3  -1  -5  396.93    4.48
  -3   1   5  382.89    5.02
  -3  -1   5  340.82    4.16
  -3  -1   5  375.46    4.99
   3  -1  -5  427.26    6.02
  -3   1   5  318.03    4.38
   3   1  -5  297.69    3.98
  -3  -1   5  400.36    6.12
  -3  -1   5  461.68    3.39
   3  -1  -5  350.05    4.64
   3   1  -5  396.25    4.58
   3  -1  -5  357.27    5.07
   3  -1  -5  370.16    3.61
   3   1  -5  348.59    4.63
  -3   1   5  492.59    4.75
  -3   1   5  402.02    6.19
  -3   1   5  413.57    4.21
   2   6   3   13.13    1.49
   2  -6   3    5.54    1.23
   2   6   3   11.42    0.75
   2  -6   3   10.04    1.53
  -2   6  -3   11.66    2.16
   2   6   3   11.74    1.15
   2   6   3    9.76    1.44
  -2   6  -3    7.97    1.31
  -2   6  -3   11.15    1.65
  -2  -6  -3   12.26    1.19
   2   6   3    8.87    1.36
  -2   6  -3   11.14    1.22
  -3  -4   4  162.28    2.98
  -3   4   4  155.44    3.45
   3   4  -4  137.18    2.96
   3   4  -4  163.89    3.09
   3  -4  -4  180.41    3.57
   3   4  -4  109.71    1.80
   3  -4  -4  139.85    3.06
  -3   4   4  117.06    2.81
   3  -4  -4  145.37    3.30
  -3  -4   4  158.25    2.90
   3  -4  -4  169.89    4.06
  -3   4   4  189.65    3.93
  -3   4   4  150.64    2.37
  -3  -4   4  129.73    1.76
   3   4  -4  139.82    3.76
  -2   7  -2  231.77    4.07
   2   7   2  254.76    4.15
   2   7   2  216.56    2.83
  -2   7  -2  229.03    4.36
  -2  -7  -2  241.74    3.61
  -2   7  -2  221.12    4.53
   2  -7   2  218.44    4.01
   2   7   2  243.34    3.49
   2   7   2  286.43    3.74
  -2   7  -2  175.10    3.84
   2  -7   2  219.13    3.79
   2  -7   2  223.69    3.71
  -2   7  -2  239.81    3.45
  -2   5   5   42.65    1.40
   2  -5  -5   48.49    2.25
   2   5  -5   44.52    2.26
  -2   5   5   53.82    2.54
   2  -5  -5   40.86    2.36
  -2  -5   5   46.90    2.21
   2  -5  -5   46.80    2.48
   2  -5  -5   52.85    2.30
   2  -5  -5   40.40    1.72
  -2  -5   5   45.26    1.98
  -2   5   5   40.57    2.51
   2   5  -5   44.24    2.17
  -2  -5   5   26.14    1.37
   2   5  -5   35.10    2.57
   1   6  -5 1210.27    8.16
   1   6  -5 1344.51   10.79
   1  -6  -5 1444.17    8.61
   1   6  -5 1066.17    8.79
   1  -6  -5 1453.62   10.61
  -1  -6   5 1202.18    8.98
  -1  -6   5 1396.80    7.33
   1   6  -5 1247.40    8.48
  -1   6   5 1301.54    6.33
   1  -6  -5 1461.55    7.58
  -1   6   5 1480.30   10.47
  -1   6   5 1457.88   10.46
   1  -6  -5 1296.19    7.43
  -1   6   5 1424.75    9.70
  -3   2  -3    0.50    2.08
   3  -2   3    0.59    1.12
   3   2   3    0.26    2.02
  -3   2  -3    0.29    0.93
  -3  -2  -3    0.14    0.97
  -3  -2  -3    0.35    0.65
  -3   2  -3    0.80    1.33
   3   2   3    0.69    0.97
   3  -2   3    0.77    0.89
   3  -2   3    0.35    0.93
   3  -2   3    0.64    1.91
   3   2   3    0.82    0.79
   3   2   3    0.59    0.65
   1   0   6    0.05    2.00
  -1   0  -6    0.79    1.12
  -1   0  -6   -0.11    1.08
   1   0   6   -0.55    2.37
  -1   0  -6   -0.03    1.40
   1   0   6    0.71    1.48
   1   0   6    0.68    1.47
   1   0   6    0.09    1.21
   2   0   5    0.27    1.03
  -2   0  -5    0.10    0.91
  -2   0  -5    0.24    1.31
   2   0   5    0.12    1.45
  -2   0  -5    0.18    1.02
   2   0   5    0.13    1.05
   0   6  -5  307.27    4.52
   0  -6   5  289.28    5.74
   0  -6  -5  318.37    4.88
   0   6  -5  311.84    5.27
   0  -6   5  344.98    5.51
   0  -6   5  245.04    4.14
   0   6   5  326.26    4.70
   0  -6  -5  330.46    3.67
   0   6  -5  353.36    5.48
   0  -6   5  299.57    4.31
   0   6   5  356.65    4.99
   0   6   5  306.71    2.80
   0  -6  -5  342.59    4.75
   0   6   5  276.64    2.52
   0   6  -5  284.87    4.18
   3  -6  -1   66.73    2.43
   3   6  -1   74.41    1.73
   3   6  -1   78.07    1.88
   3  -6  -1   65.79    2.79
   3  -6  -1   56.98    2.26
   3  -6  -1   81.48    2.05
   3   6  -1   65.35    2.56
  -3  -6   1   63.56    2.84
   3   6  -1   68.41    1.62
   3  -6  -1   69.81    1.93
  -3   6   1   63.26    2.43
   3   6  -1   59.93    1.76
   3  -6  -1   69.89    2.35
  -3  -6   1   71.24    1.43
  -1   4   6  253.31    3.06
  -1   4   6  277.62    4.48
  -1   4   6  332.83    5.08
  -1  -4   6  307.91    5.75
   1  -4  -6  327.08    4.53
  -1   4   6  282.85    4.30
  -1  -4   6  307.62    4.75
   1   4  -6  275.78    5.01
  -1  -4   6  241.39    4.21
   1  -4  -6  288.41    4.65
  -1  -4   6  246.03    3.73
   1   4  -6  280.08    4.35
   1   4  -6  266.05    4.94
  -1   4   6  341.83    5.25
   1  -4  -6  292.15    4.02
   1  -4  -6  309.89    4.53
   2   8  -1    0.95    1.01
  -2   8   1    1.95    1.85
   2  -8  -1    0.19    1.93
   2  -8  -1    0.73    0.81
   2  -8  -1    0.54    1.13
  -2   8   1    0.73    1.21
  -2   8   1    0.47    1.16
   2  -8  -1    0.35    1.29
  -2  -8   1    0.40    1.13
  -2  -8   1    0.17    1.57
   2  -8  -1    0.75    1.12
   2   8  -1    1.10    1.52
   2   8  -1    0.86    1.03
   2   8  -1    0.56    1.39
  -2  -8   1    0.65    1.08
   2   8  -1    0.46    1.03
  -2  -8   1    0.59    0.46
  -1   9   0   37.41    1.44
   1   9   0   24.91    2.03
   1   9   0   31.52    1.34
  -1   9   0   32.64    1.80
  -1   9   0   36.48    2.24
  -1   9   0   34.28    1.80
   1   9   0   32.64    1.70
   1  -9   0   31.79    1.50
   1   9   0   31.47    1.89
   1  -9   0   32.42    1.77
  -1  -9   0   39.39    2.27
   1  -9   0   28.87    2.37
  -1  -9   0   30.05    1.69
   1   9   0   33.66    1.31
   1   9   0   33.27    1.47
  -1  -9   0   35.74    1.91
   1  -9   0   30.98    1.89
  -1   9   0   26.49    2.34
  -1  -9   0   29.80    1.55
  -1   1  -6  158.07    3.16
   1  -1   6  143.83    3.96
   1  -1   6  151.95    3.36
   1  -1   6  142.37    3.28
  -1   1  -6  164.60    3.92
   1  -1   6  134.12    3.93
   1  -1   6  133.08    3.20
  -1  -1  -6  154.24    3.54
  -1   1  -6  153.54    3.38
   1   1   6  164.07    3.60
  -1  -1  -6  150.52    3.12
  -1  -1  -6  156.68    2.87
   1   1   6  147.45    3.24
   1   1   6  161.48    3.89
   1   1   6  151.23    2.91
   1   1   6  147.85    4.13
   2  -8   0    3.21    1.26
  -2   8   0    1.69    1.83
  -2   8   0    3.07    1.33
   2   8   0    2.78    1.38
   2   8   0    3.25    0.71
  -2  -8   0    3.30    1.55
   2   8   0    3.50    1.31
  -2  -8   0    3.04    0.82
   2   8   0    3.93    1.01
   2  -8   0    2.07    1.90
   2  -8   0    3.20    0.98
   2  -8   0    2.86    1.26
   2   8   0    3.87    1.12
   2   8   0    3.94    0.89
   3  -2  -5  116.39    3.06
  -3  -2   5  108.15    2.38
   3  -2  -5  133.13    2.88
  -3   2   5  164.57    3.35
  -3  -2   5  107.94    3.72
  -3  -2   5  118.02    2.61
  -3   2   5   99.69    2.74
   3  -2  -5  151.72    4.01
  -3   2   5  140.36    4.05
   3  -2  -5  120.77    2.44
  -3   2   5  126.79    3.23
   3   2  -5  130.67    3.68
  -3   2   5  129.25    2.46
   3   2  -5   88.82    2.19
   3   2  -5  117.25    2.97
   3   2  -5  123.09    2.73
  -3  -2   5  111.66    2.79
   3  -2  -5  113.75    2.90
  -2   1  -5   33.93    1.94
   2  -1   5   30.43    1.67
   2   1   5   36.04    1.94
  -2  -1  -5   35.39    1.81
  -2   1  -5   33.63    1.60
   2   1   5   34.08    1.77
  -2  -1  -5   35.49    1.83
  -2   1  -5   42.07    3.74
  -2  -1  -5   34.76    1.56
  -2   1  -5   32.31    1.79
   2  -1   5   33.34    1.78
   2   1   5   31.34    1.60
   2  -1   5   33.19    1.98
  -1  -5  -5  191.11    3.57
   1   5   5  185.40    3.48
   1  -5   5  189.59    3.99
  -1  -5  -5  214.02    2.89
  -1  -5  -5  180.11    3.53
  -1   5  -5  182.06    3.48
   1  -5   5  160.63    3.34
   1  -5   5  171.65    3.94
   1   5   5  213.51    2.94
   1   5   5  182.38    3.52
   1  -5   5  176.21    4.37
   1   5   5  206.23    3.75
  -1  -5  -5  197.73    1.99
  -1   5  -5  190.58    4.48
   1   5   5  172.98    1.96
  -1   9   1  113.33    2.66
  -1  -9   1  100.45    2.72
  -1   9   1  112.15    2.65
  -1   9   1   87.30    2.99
   1   9  -1  114.59    2.45
  -1  -9   1  113.71    3.16
   1   9  -1  104.98    2.43
   1   9  -1   90.81    2.62
   1  -9  -1  110.80    3.19
   1   9  -1  101.98    2.81
  -1   9   1  114.01    3.32
   1   9  -1  103.67    2.79
   1  -9  -1  107.11    2.75
   1  -9  -1  116.07    2.34
   1  -9  -1  141.85    3.54
  -1  -9   1  117.85    2.86
  -1  -9   1   91.02    2.03
   3  -6   0    4.22    1.30
   3   6   0    2.80    0.99
   3  -6   0    4.10    2.10
  -3   6   0    2.68    1.06
   3  -6   0    3.25    0.91
  -3  -6   0    4.58    0.51
  -3   6   0    3.90    1.40
   3   6   0    3.73    1.65
   3   6   0    2.00    0.75
   3   6   0    3.57    0.74
   3   6   0    4.62    0.94
   3   6   0    4.55    0.73
   3  -6   0    3.74    1.38
  -3   6   0    3.15    1.33
   0  -4  -6  165.58    3.66
   0   4   6  176.49    3.62
   0  -4   6  178.27    3.85
   0  -4   6  147.95    3.37
   0  -4  -6  191.11    3.31
   0   4   6  192.83    3.83
   0  -4   6  150.75    3.38
   0  -4   6  171.54    4.45
   0   4   6  156.15    2.96
   0   4   6  186.74    3.86
   0   4  -6  184.29    4.34
   0  -4  -6  177.69    2.61
   0   4   6  145.63    2.27
   0   4  -6  202.94    5.05
   3   6  -2  239.87    2.80
   3   6  -2  224.24    3.93
  -3  -6   2  214.01    4.76
  -3  -6   2  272.65    3.08
   3  -6  -2  242.03    4.31
   3  -6  -2  274.74    4.30
   3  -6  -2  224.15    3.99
   3   6  -2  284.47    3.57
   3   6  -2  260.44    3.66
  -3   6   2  212.34    4.21
  -3   6   2  273.74    4.88
   3  -6  -2  256.63    4.12
  -3   6   2  272.92    4.16
   0   9   2   68.07    2.58
   0  -9   2   68.07    2.96
   0  -9   2   59.26    2.67
   0  -9  -2   64.98    2.58
   0  -9   2   63.86    1.96
   0  -9  -2   69.43    2.04
   0   9   2   70.53    2.32
   0  -9  -2   80.42    1.54
   0  -9  -2   68.66    2.51
   0   9  -2   59.57    2.40
   0   9  -2   74.97    2.69
   0   9   2   54.42    2.67
   0   9  -2   73.16    2.16
   0  -9  -2   61.22    1.36
   0   9  -2   64.59    2.26
   0   9  -2   64.73    3.03
   0  -9   2   68.95    2.62
  -2   3   6   74.91    2.84
  -2   3   6  103.65    3.08
   2  -3  -6   99.18    3.25
  -2  -3   6   59.56    2.21
   2   3  -6   74.11    3.22
  -2  -3   6   86.89    3.70
   2   3  -6   87.52    2.82
  -2  -3   6   71.10    2.58
   2  -3  -6   78.14    2.82
  -2  -3   6   91.32    2.72
   2  -3  -6   86.83    2.79
   2   3  -6   92.03    2.73
   2  -3  -6   98.53    2.39
  -2  -3   6   60.91    1.27
   2  -3  -6   87.78    2.42
  -2   3   6   64.15    2.53
  -2   3   6   85.77    2.02
   4   0  -1    0.45    1.66
   4   0  -1    0.73    2.15
  -4   0   1    0.55    1.97
   4   0  -1    0.33    1.15
   4   0  -1    0.06    0.86
   4   0  -1    0.48    1.11
   1  -2   6    3.22    1.66
  -1  -2  -6    3.35    1.12
   1  -2   6    2.08    2.45
  -1   2  -6    4.34    1.29
  -1  -2  -6    2.94    1.41
   1   2   6    3.89    1.26
   1   2   6    3.82    1.23
   1   2   6    2.15    2.18
  -1   2  -6    3.83    1.44
   1   2   6    2.12    2.73
   1  -2   6    3.20    1.24
   1   2   6    4.08    1.55
  -1   2  -6    4.05    1.29
   1  -2   6    3.42    2.09
  -1  -2  -6    3.76    1.09
   1  -9   1   28.41    2.36
  -1   9  -1   30.22    1.84
  -1  -9  -1   30.15    1.98
   1   9   1   30.75    1.33
   1  -9   1   30.83    1.80
   1   9   1   27.12    2.06
   1   9   1   31.48    1.09
  -1  -9  -1   33.96    1.43
  -1   9  -1   33.36    1.45
   1   9   1   34.05    1.86
   1  -9   1   30.11    1.89
  -1   9  -1   33.07    2.70
  -1  -9  -1   31.93    1.70
  -1   9  -1   28.86    1.81
  -1   9  -1   23.56    1.89
   1  -9   1   31.31    1.71
  -1  -9  -1   35.41    2.19
  -1  -9  -1   28.90    1.49
   1   9   1   30.72    1.51
   2   8  -2  101.25    2.92
   2   8  -2  121.93    2.97
  -2  -8   2  126.03    2.69
   2  -8  -2  108.70    2.77
   2   8  -2  113.61    2.48
  -2   8   2  109.98    3.69
  -2   8   2  105.27    2.70
   2   8  -2  109.14    2.73
  -2  -8   2  105.58    2.37
   2  -8  -2  110.72    3.50
   2  -8  -2  111.92    2.15
   2  -8  -2  111.44    3.16
  -2  -8   2  102.16    3.29
   2  -8  -2  111.33    2.07
   2   8  -2  137.89    2.96
   2  -2   5   45.22    1.99
  -2   2  -5   49.05    2.28
   2   2   5   45.80    1.76
   2   2   5   50.04    1.86
  -2   2  -5   47.65    2.25
   2  -2   5   40.80    1.86
  -2  -2  -5   50.64    1.97
   2   2   5   58.48    3.51
  -2  -2  -5   53.30    1.97
   2   2   5   52.99    2.03
  -2  -2  -5   50.92    1.70
  -2   2  -5   48.29    1.86
  -2   2  -5   55.84    3.72
   2   2   5   57.88    2.60
   2  -2   5   45.06    2.13
   4   0  -2 1340.59    6.82
  -4   0   2 1378.13    9.77
   4   0  -2 1329.24   11.04
   4   0  -2 1309.37    7.37
   4   0  -2 1393.47    8.21
   2  -5   4   95.04    2.76
  -2   5  -4  125.26    2.73
   2  -5   4  135.45    3.50
   2   5   4  118.38    2.83
  -2   5  -4  125.03    4.09
   2  -5   4  111.18    3.47
  -2  -5  -4  135.76    2.82
  -2  -5  -4  133.27    1.46
   2   5   4  135.80    2.99
   2   5   4  149.33    2.95
   2   5   4  109.34    1.06
   2  -5   4  114.77    2.98
   2   5   4  141.30    2.16
  -2   5  -4  126.29    3.39
   4   1  -1  156.95    3.32
   4  -1  -1  162.77    3.58
   4  -1  -1  151.83    4.24
  -4  -1   1  128.40    1.16
   4   1  -1  154.63    4.26
   4  -1  -1  150.41    2.47
   4   1  -1  140.60    2.33
  -4   1   1  129.23    2.24
  -4   1   1  167.99    4.20
   4  -1  -1  117.76    2.66
   4   1  -1  120.55    2.47
  -4  -1   1  166.33    4.04
   4  -1  -1  170.01    2.57
   4  -1  -1  145.54    2.94
   4   1  -1  145.77    2.89
  -4  -1   1   79.00    1.12
  -3   3  -3   10.23    2.31
   3   3   3   11.59    2.32
  -3   3  -3   11.31    1.29
   3   3   3   13.98    1.08
   3  -3   3   11.29    2.11
  -3   3  -3   11.95    1.64
   3  -3   3    8.32    1.22
   3  -3   3    9.93    1.19
   3   3   3   11.22    0.96
   3  -3   3   11.08    1.44
  -3  -3  -3   10.01    0.87
   3   3   3   13.59    1.33
  -4   1   2   77.43    3.06
  -4  -1   2   58.07    1.59
   4  -1  -2   63.01    1.80
  -4  -1   2   68.62    2.60
   4  -1  -2   66.40    1.84
   4   1  -2   80.14    2.42
   4   1  -2   57.53    1.37
   4   1  -2   64.58    1.88
   4   1  -2   61.94    2.95
   4  -1  -2   70.36    2.57
  -4   1   2   52.89    1.63
   4  -1  -2   60.82    2.10
   4  -1  -2   57.46    2.21
   4   1  -2   54.61    1.91
   4  -1  -2   69.12    3.40
  -1   8  -3  271.06    3.86
  -1  -8  -3  280.24    4.57
  -1  -8  -3  278.88    2.28
   1   8   3  284.20    4.30
   1   8   3  263.71    4.46
  -1   8  -3  267.85    4.73
  -1   8  -3  270.35    4.83
   1   8   3  279.29    3.84
   1  -8   3  273.53    5.00
  -1   8  -3  271.07    4.41
  -2   8  -1  626.83    7.16
  -2   8  -1  760.27    7.04
  -2   8  -1  788.87    8.25
   2  -8   1  731.60    6.46
   2  -8   1  772.45    6.75
   2   8   1  757.19    6.68
   2   8   1  872.82    6.86
   2   8   1  697.33    5.48
  -2  -8  -1  865.72    5.48
  -2  -8  -1  863.21    7.17
   2   8   1  990.79    5.92
  -2   8  -1  823.43    6.04
  -1   7  -4  270.42    4.02
   1   7   4  304.35    4.89
  -1  -7  -4  332.13    4.61
   1  -7   4  271.06    4.79
  -1   7  -4  276.88    4.55
   1  -7   4  256.88    4.70
   1  -7   4  215.76    3.80
  -1   7  -4  287.97    5.16
   1   7   4  286.73    4.21
  -1  -7  -4  281.45    2.22
   1   7   4  296.97    4.39
  -1  -7  -4  280.59    4.46
  -3   3   5  371.99    4.74
   3   3  -5  297.92    4.64
  -3  -3   5  315.24    4.52
  -3  -3   5  334.93    4.24
   3   3  -5  239.18    3.06
   3   3  -5  284.22    5.21
   3   3  -5  353.02    4.63
  -3   3   5  295.73    4.48
  -3  -3   5  277.99    3.55
  -3  -3   5  267.74    5.36
   3  -3  -5  344.58    5.33
   3  -3  -5  264.46    4.19
   3  -3  -5  333.17    4.82
   3  -3  -5  287.18    3.98
  -3   3   5  310.38    3.47
  -3   3   5  332.35    5.18
   1  -9  -2  366.74    3.42
   1  -9  -2  403.89    5.24
   1  -9  -2  364.15    5.70
   1   9  -2  353.62    5.04
   1   9  -2  347.18    4.25
  -1   9   2  376.39    4.61
  -1  -9   2  428.58    6.15
   1   9  -2  386.90    4.62
  -1  -9   2  382.50    4.92
   1  -9  -2  397.62    5.81
  -1  -9   2  297.61    3.26
  -1   9   2  313.55    5.10
   1   9  -2  381.58    5.11
  -1  -9   2  471.86    5.97
   1  -9  -2  370.81    4.62
  -1   9   2  379.63    5.74
   1   9  -2  343.84    5.01
   1  -9  -2  400.64    3.61
   4   0   0 1786.37    7.44
  -4   0   0 1851.54    5.89
   4   0   0 1836.06    9.38
   4   0   0 1859.86    9.69
   4   0   0 1886.96   11.19
  -4   0   0 1932.11   12.76
   3   5   2 1122.38    5.91
  -3   5  -2  757.17    7.50
   3  -5   2 1010.73    8.80
   3   5   2 1024.65    8.22
  -3   5  -2  938.02    7.62
   3  -5   2  935.52    7.06
   3   5   2 1334.57   12.44
  -3   5  -2 1070.22   10.54
   3  -5   2 1002.31    8.34
   3   5   2 1182.86    7.12
  -3   5  -2  995.07    8.28
   3   5   2  800.92    3.48
  -3  -5  -2 1154.18    5.64
   4  -2  -1  138.96    3.27
   4  -2  -1  146.74    2.72
   4  -2  -1  125.21    2.22
   4   2  -1  128.04    2.26
   4   2  -1  114.09    2.28
   4  -2  -1  118.12    2.74
   4   2  -1  129.10    3.77
  -4  -2   1  192.24    5.04
  -4   2   1  159.92    4.32
   4   2  -1  154.00    3.21
  -4   2   1  107.88    2.33
   4  -2  -1  130.68    2.94
   4   2  -1  129.47    2.61
   4   1   0  284.00    5.31
  -4   1   0  240.18    2.84
  -4   1   0  318.88    5.72
   4  -1   0  285.93    4.06
   4   1   0  314.02    4.70
   4  -1   0  232.72    3.46
   4  -1   0  295.09    3.30
   4  -1   0  298.33    4.83
   4   1   0  285.93    3.76
  -4   1   0  338.36    3.14
  -4  -1   0  357.65    6.49
   4   1   0  272.33    3.02
  -3  -5   4  148.42    4.19
  -3  -5   4  147.25    1.49
  -3   5   4  184.22    3.96
   3   5  -4  222.86    3.69
   3   5  -4  142.15    3.76
  -3  -5   4  207.80    3.19
   3  -5  -4  213.68    4.45
  -3  -5   4  216.24    3.47
   3   5  -4  176.98    3.39
   3  -5  -4  201.24    4.02
   3  -5  -4  171.93    3.47
  -3   5   4  188.12    2.69
   3  -5  -4  226.45    4.09
  -3   5   4  232.59    4.39
   3   6   1  410.69    3.82
   3   6   1  349.76    3.11
   3   6   1  353.66    4.70
  -3   6  -1  264.15    4.54
   3   6   1  365.25    2.06
  -3   6  -1  338.65    4.85
   3  -6   1  348.43    5.00
   3   6   1  479.13    7.81
   3  -6   1  333.32    5.11
   3   6   1  403.19    4.71
  -3   6  -1  369.47    5.94
   3   6   1  482.28    3.50
   3   6   1  251.96    2.15
  -2  -7   4  170.99    3.59
   2  -7  -4  180.17    3.63
   2   7  -4  159.68    3.66
   2   7  -4  174.92    2.54
   2  -7  -4  173.71    4.04
   2   7  -4  134.64    3.67
   2  -7  -4  149.20    3.06
  -2  -7   4  155.97    3.27
  -2   7   4  158.86    3.84
   2  -7  -4  171.57    3.78
  -2   7   4  182.69    3.71
   2  -7  -4  160.58    2.67
   2   7  -4  153.98    3.14
  -2  -7   4  101.21    1.62
  -2  -7   4  132.73    4.17
   4  -2  -2  260.05    3.57
   4   2  -2  213.57    3.02
   4   2  -2  262.47    3.26
  -4   2   2  306.35    5.04
  -4  -2   2  285.84    5.11
  -4   2   2  231.57    3.52
   4   2  -2  345.47    4.30
   4  -2  -2  242.16    3.95
   4  -2  -2  268.66    4.15
   4   2  -2  201.90    2.17
   4  -2  -2  271.47    4.40
   4   2  -2  270.54    5.07
  -4  -2   2  247.88    2.86
   4  -2  -2  274.20    3.36
   3  -6  -3  399.41    6.48
  -3  -6   3  406.02    4.32
   3  -6  -3  374.39    5.21
  -3   6   3  378.19    5.64
   3   6  -3  165.22    2.77
   3   6  -3  296.67    4.10
  -3  -6   3  282.29    5.50
   3   6  -3  356.28    4.34
  -3   6   3  358.90    5.29
  -3  -6   3  371.93    4.17
   3   6  -3  267.49    2.45
   3  -6  -3  335.60    5.28
   3   6  -3  298.92    5.00
   3  -6  -3  357.84    5.46
  -1  -3  -6  496.90    5.08
   1  -3   6  479.53    6.19
   1   3   6  536.58    6.31
   1   3   6  421.43    5.21
  -1   3  -6  464.54    5.44
   1   3   6  431.11    4.09
   1  -3   6  417.92    5.33
   1  -3   6  452.71    6.41
   1   3   6  491.78    5.75
  -1  -3  -6  484.02    4.33
  -1  -3  -6  467.24    5.86
  -1   3  -6  460.23    5.75
  -1   3  -6  605.75    9.35
   1  -3   6  446.08    6.45
  -1   3  -6  473.94    6.56
   2  -3   5  493.49    5.85
  -2   3  -5  494.85    6.14
  -2  -3  -5  584.64    4.97
   2   3   5  544.99    4.41
   2   3   5  608.52    6.09
  -2   3  -5  489.76    5.17
   2   3   5  540.13    5.99
   2  -3   5  411.22    5.60
  -2   3  -5  535.48    6.20
   2   3   5  495.85    4.83
   2  -3   5  478.33    5.54
   2  -3   5  485.62    5.58
  -2  -3  -5  527.37    5.56
  -2   3  -5  539.85    7.92
  -1   0   7 1041.04    7.28
   1   0  -7 1009.05    8.55
  -1   0   7 1328.19   11.71
   1   0  -7 1269.91   10.73
  -1   0   7 1033.30    7.70
   1   0  -7 1049.94    8.19
  -1   0   7  956.79    9.20
  -1   0   7 1143.37    9.25
  -1  -5   6  213.56    3.36
  -1   5   6  222.27    4.19
  -1  -5   6  200.42    4.19
   1   5  -6  190.74    4.45
  -1   5   6  199.17    3.53
  -1  -5   6  165.31    3.33
   1   5  -6  206.29    4.61
  -1   5   6  217.18    4.31
  -1  -5   6  164.65    4.54
  -1   5   6  186.72    2.59
   1  -5  -6  208.56    4.19
   1  -5  -6  239.91    3.82
   1  -5  -6  197.35    3.22
  -4   0   3    0.01    0.73
  -4   0   3    0.14    0.90
   4   0  -3    0.12    0.86
  -4   0   3    0.05    1.63
   4   0  -3    0.20    1.05
   4   0  -3    0.16    1.36
   4   0  -3   -0.01    1.40
   0  -8  -4 1073.99    6.07
   0  -8  -4 1193.16   10.19
   0   8   4 1209.76    9.03
   0  -8  -4 1370.94   10.37
   0  -8  -4 1032.27    5.41
   0   8   4 1213.12    9.89
   0   8  -4 1024.01    7.94
   0  -8   4 1141.77    9.53
   0   8  -4 1098.91    9.70
   0  -8   4 1009.90    7.74
   0   8  -4 1011.48    7.72
   0   8  -4 1132.83    8.78
   0   8   4 1083.03    8.95
   0  -8   4 1046.99   10.15
  -2   4   6    8.49    0.98
  -2   4   6    8.49    1.90
  -2  -4   6    8.76    1.34
   2   4  -6    8.18    1.77
  -2   4   6    8.48    1.89
   2  -4  -6    8.34    1.36
  -2  -4   6    5.56    1.23
   2   4  -6    7.94    1.40
  -2  -4   6    2.91    0.53
   2  -4  -6    5.17    1.62
  -2  -4   6    6.43    2.27
   2  -4  -6    9.22    2.00
   2  -4  -6   10.94    1.48
   2  -4  -6    8.28    1.33
   1  -1  -7   32.95    2.06
   1  -1  -7   37.62    3.01
  -1  -1   7   34.73    2.37
  -1   1   7   28.31    2.06
  -1   1   7   29.57    2.35
   1   1  -7   33.16    2.91
  -1   1   7   32.80    1.77
  -1  -1   7   36.94    2.52
  -1   1   7   32.49    1.87
  -1  -1   7   28.71    2.59
   1   1  -7   33.86    2.18
  -1  -1   7   34.08    1.64
   1   1  -7   39.70    2.43
   1  -1  -7   32.65    1.87
   1  -1  -7   36.04    2.15
  -1  -1   7   35.57    1.92
   4   1  -3   26.26    1.65
   4  -1  -3   23.73    1.85
  -4   1   3   23.79    2.14
  -4   1   3   23.00    1.48
   4  -1  -3   17.45    1.63
   4   1  -3   23.23    1.48
  -4  -1   3   25.39    1.89
  -4  -1   3   25.47    1.29
  -4   1   3   22.82    1.18
   4   1  -3   18.85    1.55
  -4  -1   3   22.40    1.33
   4   1  -3   20.65    1.24
   4  -1  -3   24.65    1.45
   4  -1  -3   21.99    1.40
  -2  -6   5   83.47    2.54
   2   6  -5   70.94    3.12
   2   6  -5   83.44    2.87
  -2   6   5   91.77    1.86
   2  -6  -5  119.41    3.24
   2   6  -5   93.35    2.78
  -2  -6   5  107.71    3.04
   2  -6  -5  110.73    3.20
  -2  -6   5   65.66    1.86
  -2   6   5  102.41    3.04
   2  -6  -5   97.37    2.42
   2  -6  -5   97.63    3.10
  -2   6   5  103.56    3.43
   4   2   0  185.42    3.99
   4  -2   0  161.88    2.51
  -4   2   0  181.06    2.67
   4   2   0  167.80    2.84
  -4   2   0  140.63    2.62
   4   2   0  162.44    4.28
   4   2   0  157.01    2.27
   4  -2   0  132.98    3.01
   4  -2   0  166.75    3.84
   4  -2   0  157.54    3.19
  -4   2   0  180.24    4.56
   1   8  -4  155.85    3.71
   1   8  -4  201.81    3.48
   1   8  -4  178.89    3.38
  -1  -8   4  210.84    4.25
  -1  -8   4  161.61    3.42
  -1  -8   4  166.05    4.46
   1  -8  -4  177.16    2.63
   1  -8  -4  179.97    3.07
   1  -8  -4  179.38    1.81
   1  -8  -4  210.67    4.86
   1   8  -4  191.68    4.27
  -1   8   4  198.69    3.89
  -1  -8   4  166.78    3.21
   0   5   6   15.03    1.60
   0  -5   6    9.76    1.77
   0   5  -6   12.54    2.33
   0  -5  -6   14.34    1.53
   0   5   6   11.85    1.48
   0   5   6   13.15    1.87
   0  -5  -6   14.77    1.08
   0   5   6   16.57    2.00
   0  -5   6   11.93    1.99
   0   5  -6   12.32    1.69
   0  -5  -6   13.62    1.41
   0  -5   6    9.40    2.53
   0   5   6   13.10    1.08
   1  -9   2  245.46    4.58
  -1  -9  -2  295.72    4.76
  -1  -9  -2  230.92    4.39
  -1   9  -2  238.74    3.44
  -1   9  -2  235.11    4.05
   1  -9   2  213.20    3.54
   1   9   2  269.91    4.52
   1   9   2  245.22    3.57
   1  -9   2  232.74    4.31
  -1   9  -2  257.60    4.73
   1   9   2  229.98    4.32
  -1   9  -2  233.24    4.58
  -1  -9  -2  292.71    4.20
  -1  -9  -2  288.02    3.18
   1  -9   2  213.01    4.22
  -2  -8   3   81.58    2.69
   2   8  -3   64.00    2.89
   2  -8  -3   68.35    2.62
   2  -8  -3   67.80    2.28
  -2  -8   3   67.70    3.30
   2   8  -3   75.86    2.64
   2  -8  -3   70.14    1.63
  -2  -8   3   56.51    1.81
   2   8  -3   73.89    2.25
  -2  -8   3   64.10    2.14
   2   8  -3   73.01    2.33
  -2   8   3   67.11    2.38
   2  -8  -3   73.05    2.72
   2  -8  -3   63.42    1.72
   3   4   3  198.37    2.73
   3  -4   3  159.32    3.08
   3   4   3  258.71    3.07
  -3  -4  -3  219.62    2.87
   3   4   3  174.22    1.59
  -3   4  -3  209.16    3.99
  -3   4  -3  209.43    4.09
   3  -4   3  187.72    3.67
  -3   4  -3  217.58    5.16
   3  -4   3  184.12    3.41
   3   4   3  183.92    2.09
   3   4   3  220.73    5.03
   3   4   3  229.53    3.84
   2   7   3  124.18    2.76
  -2   7  -3   67.85    2.68
   2   7   3  124.11    2.72
  -2   7  -3  100.45    2.44
   2  -7   3   84.83    3.04
   2   7   3  107.44    1.39
   2   7   3  107.60    2.86
  -2   7  -3   86.98    2.82
   2  -7   3  108.11    3.21
  -2   7  -3  107.53    3.53
  -2  -7  -3  117.01    2.77
   2   7   3  106.32    1.90
   1  -6   5  541.45    7.34
  -1   6  -5  551.65    7.32
   1  -6   5  517.78    6.45
   1   6   5  560.20    3.55
  -1  -6  -5  565.69    6.01
  -1  -6  -5  634.64    4.62
   1   6   5  522.27    2.96
  -1  -6  -5  547.63    6.30
   1   6   5  605.40    6.56
   1   6   5  528.15    6.09
   1   6   5  552.34    6.00
   1  -6   5  494.69    6.18
   0   0  -7   -0.03    1.65
   0   0  -7    0.18    1.30
   0   0   7    0.43    2.10
   0   0   7    0.27    1.24
   0   0   7    0.33    2.15
   4  -3  -1  213.42    4.05
   4   3  -1  200.30    2.72
   4  -3  -1  203.32    2.87
  -4   3   1  163.06    3.14
  -4   3   1  247.17    5.09
   4   3  -1  243.42    4.31
   4   3  -1  194.50    4.38
   4  -3  -1  211.68    3.46
   4  -3  -1  150.27    3.22
   4   3  -1  175.29    2.55
   4  -3  -1  201.43    3.60
   1   7  -5   15.69    1.81
   1   7  -5   22.08    2.13
  -1  -7   5   22.43    2.16
   1  -7  -5   23.54    1.86
   1   7  -5   16.33    2.30
   1   7  -5   18.65    1.69
  -1  -7   5   18.41    1.59
  -1  -7   5   19.33    1.70
  -1   7   5   19.72    1.03
   1  -7  -5   19.03    1.35
  -1   7   5   23.70    1.96
   1  -7  -5   25.96    1.63
   0  -9  -3    4.28    1.28
   0  -9   3    2.35    2.27
   0  -9   3    3.82    1.61
   0   9  -3    4.88    1.43
   0  -9  -3    3.35    0.79
   0   9   3    2.88    1.26
   0  -9   3    3.17    1.76
   0   9   3    2.79    1.80
   0   9   3    3.75    1.31
   0   9  -3    2.57    1.28
   0  -9  -3    4.10    1.07
   0  -9  -3    4.28    1.54
   0   9  -3    4.36    1.27
   0   9  -3    3.22    1.82
   0  -9   3    2.91    1.16
   3   4  -5    1.92    1.42
  -3  -4   5    1.54    1.17
  -3   4   5    0.69    1.17
   3  -4  -5    1.71    1.84
  -3  -4   5    0.64    1.95
  -3   4   5    1.83    0.88
   3  -4  -5    0.68    1.55
  -3  -4   5    0.72    0.97
  -3   4   5    1.23    1.34
   3  -4  -5    1.50    1.55
  -3   4   5    1.18    1.67
  -3  -4   5    1.55    1.12
   3  -4  -5    0.90    1.12
   3   4  -5    1.60    1.33
   0  -7  -5   11.40    1.49
   0   7  -5   11.03    2.29
   0  -7   5   10.33    1.87
   0   7  -5    7.61    1.50
   0   7   5    8.99    0.75
   0   7   5   11.16    1.48
   0  -7  -5   10.06    1.12
   0  -7  -5   11.81    1.70
   0   7   5    9.74    1.42
  -1  -2   7  467.03    7.18
  -1   2   7  501.39    5.87
   1   2  -7  440.92    6.24
  -1   2   7  452.08    4.73
  -1  -2   7  485.05    6.15
   1  -2  -7  511.54    6.55
  -1  -2   7  483.81    5.63
   1  -2  -7  490.22    5.52
   1   2  -7  534.10    7.11
  -1  -2   7  497.38    5.92
  -1   2   7  481.05    6.58
   1  -2  -7  515.97    6.27
  -3  -7   1  258.75    2.63
   3  -7  -1  234.05    3.30
   3   7  -1  234.17    3.19
   3  -7  -1  272.37    4.84
  -3   7   1  219.99    4.37
  -3  -7   1  223.57    4.85
   3   7  -1  289.11    3.73
   3   7  -1  232.44    3.98
   3   7  -1  302.83    3.37
   3  -7  -1  236.61    4.53
   3   7  -1  259.92    3.41
   0   1   7  366.19    5.70
   0  -1  -7  393.01    4.62
   0  -1   7  395.61    6.04
   0  -1   7  432.89    5.93
   0  -1  -7  410.57    5.25
   0   1  -7  384.31    5.27
   0  -1   7  360.37    6.23
   0   1   7  388.73    4.66
   0  -1   7  387.73    5.10
   0   1  -7  371.91    4.78
   4   2  -3   40.49    1.43
   4   2  -3   57.73    1.81
  -4   2   3   43.06    1.80
   4  -2  -3   46.56    2.21
  -4  -2   3   48.44    1.52
  -4  -2   3   62.56    1.77
   4   2  -3   40.29    1.73
  -4   2   3   50.67    2.61
   4   2  -3   53.04    1.99
   4  -2  -3   48.23    1.90
   4  -2  -3   40.58    2.00
  -4  -2   3   48.22    2.55
  -4   3   2   85.89    2.35
   4  -3  -2  101.35    3.25
   4  -3  -2   84.82    2.65
   4  -3  -2  105.02    2.81
   4   3  -2  125.43    2.87
  -4   3   2  122.71    3.52
   4  -3  -2  100.19    2.50
  -4  -3   2   94.85    1.87
   4   3  -2   74.05    1.76
   4   3  -2   55.94    1.10
   4   3  -2   98.84    3.31
  -4  -3   2  110.10    1.34
   4   3  -2  103.30    2.34
   3   0   4    0.10    0.91
  -3   0  -4    0.25    1.25
  -3   0  -4   -0.70    3.04
   3   0   4    0.14    1.32
  -3   0  -4    0.13    1.00
   3   0   4   -0.01    1.00
   4   0   1   -0.01    1.89
  -4   0  -1    0.51    2.22
  -4   0  -1   -0.10    0.46
   4   0   1   -0.04    1.06
   4   0   1    0.24    0.77
   0  10   0   80.49    2.83
   0 -10   0   82.35    3.16
   0  10   0   86.24    2.37
   0  10   0   93.43    1.90
   0 -10   0   93.00    2.93
   0 -10   0   95.66    2.78
   0  10   0   81.90    2.60
   0 -10   0   89.49    2.58
  -2   8  -2  779.96    8.03
  -2  -8  -2  873.19    7.29
   2   8   2  661.40    4.39
   2   8   2  867.46    5.98
   2  -8   2  683.08    6.32
  -2   8  -2  819.79    6.35
  -2   8  -2  755.15    8.09
   2  -8   2  746.79    6.87
   2   8   2  784.08    6.94
   2   8   2  872.25    6.98
   3   1   4    9.82    1.36
   3   1   4    9.00    1.14
  -3   1  -4   11.37    1.59
  -3  -1  -4   11.32    1.42
   3   1   4    9.99    1.22
   3  -1   4    9.77    1.45
  -3   1  -4   11.42    3.10
  -3  -1  -4   10.42    1.23
   3  -1   4    8.72    1.18
  -3   1  -4    8.97    1.26
   3  -1   4    8.54    1.20
  -4   1  -1   13.88    1.08
   4  -1   1   15.22    1.24
  -4   1  -1   14.28    2.48
   4   1   1   14.27    0.94
  -4   1  -1   16.75    1.08
   4  -1   1   15.15    1.10
   4   1   1   17.24    2.36
   4   1   1   17.08    1.33
   4  -1   1   15.28    1.48
   4  -1   1   16.27    2.15
   1   9  -3   55.53    2.15
   1   9  -3   57.06    2.36
  -1   9   3   49.67    2.77
   1  -9  -3   58.40    2.04
  -1  -9   3   42.17    1.50
   1  -9  -3   64.74    1.45
   1   9  -3   51.29    2.31
  -1  -9   3   45.46    2.31
  -1   9   3   55.21    2.16
   1  -9  -3   66.79    2.21
  -1  -9   3   55.91    3.03
   1  -9  -3   59.16    2.55
  -1  -9   3   63.17    2.82
   1   9  -3   55.68    2.34
   1  -9  -3   56.36    1.53
   3   7   0  242.42    3.76
   3   7   0  297.40    3.40
   3  -7   0  220.93    4.12
  -3   7   0  200.11    3.79
  -3  -7   0  219.58    1.73
   3   7   0  258.58    2.51
   3   7   0  133.10    1.71
   3  -7   0  208.01    3.27
  -3   7   0  205.36    4.31
   3   7   0  188.10    3.72
   3   7   0  251.21    3.24
   3   0  -6    0.13    1.07
   3   0  -6   -0.01    1.29
  -3   0   6    0.09    1.13
  -3   0   6    0.27    1.24
  -3   0   6    0.20    1.81
  -3   0   6    0.20    1.10
  -3   0   6    0.25    1.49
   3   7  -2   76.83    2.29
  -3   7   2   81.21    3.18
   3   7  -2   79.36    2.06
  -3   7   2   84.84    2.55
   3   7  -2   70.43    2.70
   3   7  -2   86.30    2.24
  -3  -7   2   85.42    1.96
   3   7  -2  102.24    2.64
  -3  -7   2   58.45    2.98
   3  -7  -2   79.59    2.69
  -3   7   2   72.72    2.73
   3  -7  -2   84.82    2.09
  -2  -6  -4 1237.15    8.63
  -2   6  -4 1205.58   11.06
   2  -6   4 1164.02    9.86
   2   6   4 1154.71    8.69
   2   6   4 1220.96    5.44
   2   6   4 1321.98    8.60
   2  -6   4 1065.65    8.61
   2   6   4 1375.31    9.45
  -2   6  -4 1053.21    9.71
   4  -3   0  100.33    2.69
   4   3   0  102.18    1.87
   4  -3   0  102.34    3.19
   4  -3   0  101.38    2.11
  -4   3   0  122.27    4.12
   4  -3   0   86.78    2.67
  -4   3   0   84.93    2.34
   4  -3   0   98.48    2.39
   4   3   0  100.79    3.31
  -4   3   0  111.61    2.43
   4   3   0  111.09    2.27
   4   3   0  126.09    3.54
   1  -4   6   50.43    2.84
   1   4   6   44.66    1.54
  -1   4  -6   53.05    3.43
  -1   4  -6   42.74    2.34
   1   4   6   44.88    2.28
   1  -4   6   55.21    3.69
   1   4   6   50.77    2.35
  -1  -4  -6   46.37    2.06
  -1  -4  -6   50.23    1.50
  -1  -4  -6   51.84    2.00
   1  -4   6   35.01    2.46
   1   4   6   48.78    2.16
   0  10   1   17.97    0.99
   0  10  -1   11.91    1.97
   0 -10  -1   11.81    1.93
   0  10  -1   15.05    1.52
   0  10   1   11.33    1.93
   0 -10  -1   13.78    1.72
   0 -10  -1   15.43    1.45
   0 -10   1   14.34    1.47
   0  10  -1   16.26    1.26
   0 -10   1   18.45    2.01
   0 -10  -1   13.42    1.59
   0  10   1   11.44    1.36
   0 -10  -1   19.79    1.79
   0  10   1   15.10    1.42
   0  10   1   14.64    1.67
   0  10  -1   14.98    1.60
   0 -10   1   14.00    2.17
   0 -10   1   14.83    2.25
   2   4   5   44.16    1.91
   2   4   5   40.41    1.38
  -2   4  -5   36.69    2.18
  -2   4  -5   41.39    2.36
   2  -4   5   31.63    1.76
   2   4   5   43.17    2.13
  -2  -4  -5   47.37    1.60
   2   4   5   37.24    1.45
  -2  -4  -5   42.47    1.91
  -2   4  -5   34.69    2.84
   2  -4   5   32.51    1.87
   2  -4   5   35.32    2.18
   0   2  -7   46.31    2.06
   0   2   7   51.43    1.95
   0  -2  -7   52.71    1.97
   0   2   7   61.70    2.86
   0  -2  -7   47.28    2.27
   0   2  -7   48.12    2.39
   0  -2   7   51.33    2.34
   0  -2   7   46.67    3.05
   0  -2  -7   57.15    2.53
   0  -2   7   54.25    2.83
   0  -2   7   39.61    2.22
   0   2   7   59.41    2.80
   0   2   7   58.63    2.41
  -3   1   6  159.81    3.00
  -3  -1   6  134.37    3.17
   3  -1  -6  148.78    2.51
  -3   1   6  141.78    3.46
   3  -1  -6  101.91    2.76
  -3   1   6  150.67    2.81
   3  -1  -6  138.13    3.78
   3   1  -6  128.87    3.17
  -3  -1   6  155.05    3.59
  -3   1   6  129.84    4.00
   3  -1  -6  135.49    3.33
  -3  -1   6  163.35    2.10
  -3  -1   6  135.73    2.89
   3   1  -6  108.55    2.65
  -3  -1   6  130.26    4.15
  -3   1   6  134.92    3.52
   2   9  -1  321.18    4.38
  -2  -9   1  340.49    4.98
   2  -9  -1  346.26    4.11
   2   9  -1  352.69    3.70
  -2  -9   1  348.10    4.02
   2  -9  -1  325.23    5.58
  -2   9   1  315.25    4.49
   2   9  -1  359.63    4.87
  -2   9   1  322.41    5.43
  -2  -9   1  287.23    4.07
   2   9  -1  338.81    4.66
   2  -9  -1  314.35    4.81
   2   9  -1  292.24    4.19
   3   2   4   60.58    1.95
  -3   2  -4   61.04    3.59
   3  -2   4   57.61    2.27
  -3   2  -4   50.04    2.08
  -3  -2  -4   56.06    1.73
  -3   2  -4   72.80    2.90
   3   2   4   75.41    2.12
   3   2   4   55.26    1.84
  -3  -2  -4   64.41    2.00
   3  -2   4   46.80    1.97
   3  -2   4   55.18    2.07
  -2   0   7    0.61    1.33
  -2   0   7    0.85    1.13
   2   0  -7    0.57    2.09
   2   0  -7    0.26    1.11
   2   0  -7   -0.02    1.31
  -2   0   7    0.40    1.41
  -2   0   7    0.36    1.80
  -4   2  -1  317.69    6.17
  -4   2  -1  281.86    3.38
   4  -2   1  266.13    3.77
  -4   2  -1  226.30    3.40
   4   2   1  269.55    5.02
   4   2   1  283.49    2.93
   4  -2   1  278.56    3.32
   4   2   1  301.21    3.77
   4  -2   1  278.52    4.23
   4  -2   1  291.12    5.10
   4   2   1  337.20    5.65
   3   6   2  175.70    2.96
   3   6   2  142.41    3.30
  -3  -6  -2  181.21    2.60
  -3   6  -2  123.88    3.17
  -3   6  -2  147.06    4.25
   3   6   2  203.01    5.88
  -3   6  -2  125.61    3.39
   3   6   2  142.43    2.94
   3  -6   2  136.37    3.38
  -2  -9   0  119.92    1.96
   2   9   0  132.35    2.89
  -2  -9   0  148.42    3.22
   2   9   0  169.15    2.21
  -2   9   0  129.33    3.77
   2  -9   0  137.80    3.37
   2  -9   0  148.19    3.02
  -2  -9   0  130.88    2.15
   2   9   0  167.65    3.25
   2   9   0  151.19    3.44
   2   9   0  163.47    3.43
   1  -3  -7  109.22    2.86
  -1  -3   7  131.85    3.20
  -1   3   7  125.39    3.21
  -1  -3   7  112.40    4.04
   1  -3  -7  120.12    3.36
  -1   3   7  109.69    2.45
  -1  -3   7   97.69    2.92
   1  -3  -7  117.81    3.65
  -1   3   7  105.37    3.27
   1   3  -7  128.82    3.83
  -1  -3   7  113.76    3.15
  -4   0   4   49.90    1.64
   4   0  -4   34.66    1.87
  -4   0   4   48.23    1.87
   4   0  -4   43.85    1.88
  -4   0   4   50.26    1.94
   4   0  -4   42.51    1.80
  -4   0   4   62.36    2.45
   4  -3  -3  116.90    2.83
  -4  -3   3  109.69    2.14
   4   3  -3  116.85    2.61
   4  -3  -3  105.94    2.80
   4   3  -3   79.72    1.92
  -4   3   3  103.49    2.79
   4  -3  -3  112.23    2.93
  -4   3   3   89.01    2.57
   4   3  -3   87.96    1.94
  -4   3   3  126.82    3.60
  -4  -3   3  150.28    2.47
   4  -3  -3   89.32    2.71
  -2  -1   7  182.13    3.67
  -2   1   7  146.31    3.71
   2   1  -7  211.21    4.65
   2   1  -7  157.52    3.30
  -2   1   7  163.53    2.98
   2  -1  -7  164.53    3.69
  -2  -1   7  175.07    4.62
  -2   1   7  169.22    3.34
  -2  -1   7  159.06    2.72
  -2  -1   7  178.70    3.83
  -2   1   7  131.94    4.00
  -2  -1   7  148.79    4.33
   2  -1  -7  162.71    3.43
   2  -1  -7  197.54    4.67
   3   6  -4   51.13    2.24
   3   6  -4   67.11    2.39
  -3  -6   4   70.16    2.11
  -3   6   4   72.77    3.11
   3  -6  -4   68.19    2.86
  -3  -6   4   46.50    2.96
  -3  -6   4   77.11    2.39
   3  -6  -4   75.60    3.15
  -3   6   4   78.27    2.95
   3  -6  -4   67.61    2.66
  -2  -5   6    0.01    2.22
  -2  -5   6    0.28    1.47
   2  -5  -6    0.47    1.32
   2  -5  -6    0.42    1.26
  -2   5   6    0.17    1.75
  -2  -5   6   -0.06    1.13
  -2  -5   6    0.54    0.58
   2  -5  -6    0.28    1.14
  -2  -5   6    0.20    1.36
  -2   5   6    0.46    1.61
  -2   5   6    0.02    0.76
   2  -5  -6   -0.27    1.85
   2   5  -6    0.13    1.26
  -4   1   4    7.91    1.38
   4  -1  -4    6.33    1.44
   4  -1  -4    7.71    1.66
   4   1  -4    7.28    1.26
  -4  -1   4    4.25    2.12
   4   1  -4    6.34    1.06
  -4   1   4    8.33    1.71
   4  -1  -4   10.79    1.30
  -4  -1   4    8.31    1.47
  -4  -1   4    8.31    1.17
  -4   1   4    8.47    1.35
  -4  -1   4    8.16    1.02
  -4  -1   4    9.35    1.26
   4   1  -4    8.95    1.37
  -4   1   4    8.95    1.08
  -3   2   6   75.88    2.74
  -3  -2   6   77.38    2.63
   3  -2  -6   65.91    2.42
  -3   2   6   85.04    2.64
   3  -2  -6   70.16    2.10
  -3   2   6   77.44    2.07
   3  -2  -6   59.87    2.25
  -3  -2   6   72.44    2.44
  -3   2   6   64.57    2.62
   3   2  -6   66.50    2.59
   3  -2  -6   77.90    3.33
   3   2  -6   56.32    2.03
  -3   2   6   72.25    3.26
  -3  -2   6   54.59    3.20
   4   4  -1   15.61    1.07
   4  -4  -1   17.14    1.53
  -4  -4   1   19.50    1.03
  -4   4   1   18.03    1.59
   4  -4  -1   18.94    1.47
   4   4  -1   17.86    2.31
   4  -4  -1   15.63    2.22
   4   4  -1   15.32    1.89
   4   4  -1   17.29    1.19
  -4   4   1   19.65    2.40
  -1 -10   0  137.14    3.59
   1 -10   0  113.45    2.82
   1  10   0  118.65    3.07
   1 -10   0  102.80    2.91
   1  10   0  107.34    3.12
  -1 -10   0   99.32    2.46
  -1  10   0  104.26    2.96
   1 -10   0  106.74    2.82
  -1 -10   0  126.77    3.03
   1  10   0  104.56    2.32
   1  10   0  122.53    2.27
   1  10   0   91.83    3.03
  -1 -10   0  112.78    2.68
  -1  10   0   94.82    3.43
  -1  10   0  111.73    2.81
   1  10   0  108.50    2.18
  -1  10   0  125.63    2.39
  -1   6   6    5.43    1.62
   1  -6  -6    5.02    1.34
   1  -6  -6    5.82    1.70
  -1  -6   6    5.26    2.24
   1   6  -6    4.75    1.42
  -1   6   6    5.00    1.80
  -1  -6   6    6.12    1.61
   1   6  -6    4.93    1.88
  -1   6   6    4.79    0.82
  -1   6   6    6.01    1.63
  -1  -6   6    4.98    1.61
  -1 -10   1   45.92    2.59
  -1  10   1   42.71    1.96
  -1 -10   1   46.77    2.30
   1 -10  -1   38.24    1.99
   1 -10  -1   44.27    2.36
   1  10  -1   40.68    1.79
  -1  10   1   34.52    2.42
  -1  10   1   41.49    1.86
  -1 -10   1   42.64    2.22
   1  10  -1   42.03    1.64
   1 -10  -1   38.72    2.31
  -1 -10   1   34.68    1.62
   1 -10  -1   42.79    1.75
   1  10  -1   33.10    2.21
   1  10  -1   38.27    2.05
   1  10  -1   43.08    2.09
   4   4  -2   10.03    1.86
   4   4  -2   11.78    1.33
  -4   4   2   10.62    1.38
  -4   4   2   12.75    2.21
   4   4  -2    6.18    0.54
   4  -4  -2   11.67    1.37
   4  -4  -2    9.56    1.97
  -4  -4   2    8.38    0.52
   4  -4  -2    8.62    1.60
  -4  -4   2   11.80    0.94
   4   4  -2    9.66    1.60
   4  -4  -2   10.75    1.29
   3  -5   3    9.99    1.50
  -3   5  -3    7.48    1.46
  -3   5  -3    9.22    1.46
   3   5   3   10.34    0.94
  -3   5  -3   11.38    2.61
  -3  -5  -3   11.52    1.06
   3  -5   3   11.00    1.35
   3   5   3    9.28    1.87
   3   5   3   13.67    1.61
   3   5   3   12.27    1.10
   3  -7   1  379.69    4.63
  -3   7  -1  348.65    5.51
  -3   7  -1  415.54    5.72
   3   7   1  454.92    4.22
   3   7   1  450.64    3.89
   3   7   1  442.03    5.07
   3   7   1  426.07    5.23
   3  -7   1  408.22    5.59
  -3   7  -1  438.48    6.72
  -1  -8  -4   44.84    2.27
   1   8   4   39.97    2.25
   1  -8   4   40.57    2.53
  -1  -8  -4   43.66    1.08
   1  -8   4   38.97    3.09
   1   8   4   42.37    1.98
  -1   8  -4   36.25    2.33
  -1   8  -4   39.55    2.64
   1   8   4   46.89    2.07
  -2  -9   2  161.13    2.90
  -2   9   2  188.29    3.64
   2   9  -2  189.38    3.16
   2  -9  -2  158.98    4.02
   2   9  -2  160.87    3.41
  -2   9   2  163.44    4.40
   2  -9  -2  175.89    2.66
   2   9  -2  179.32    3.64
  -2  -9   2  169.84    4.13
   2   9  -2  165.07    3.78
  -2  -9   2  198.57    3.50
   2  -9  -2  174.49    2.70
   2   9  -2  169.63    3.09
   2  -9  -2  201.32    4.17
   0  -3   7 1367.47   10.41
   0   3  -7 1375.94   11.48
   0   3   7 1361.38    9.82
   0  -3  -7 1340.77    8.88
   0  -3   7 1357.66   10.04
   0  -3   7 1177.29   11.19
   0   3   7 1424.81   10.23
   0  -3  -7 1366.36    8.00
   0   3   7 1284.60    9.03
   0  -3  -7 1296.80   10.46
   0  -3   7 1559.37   11.88
   0   3   7 1248.06    7.73
  -2  -2   7  173.66    3.56
   2  -2  -7  193.19    4.63
  -2   2   7  141.19    3.60
  -2   2   7  159.63    4.16
   2  -2  -7  190.79    4.11
  -2  -2   7  121.37    3.25
  -2   2   7  161.67    2.93
  -2  -2   7  194.99    3.14
  -2   2   7  174.40    3.57
  -2  -2   7  156.74    2.52
   2   2  -7  172.48    4.28
  -2  -2   7  144.95    4.39
  -3  -7   3  268.99    3.74
   3  -7  -3  262.12    5.13
  -3   7   3  251.03    4.92
  -3   7   3  235.25    4.17
  -3  -7   3  261.05    3.68
   3   7  -3  216.38    3.92
   3   7  -3  263.13    3.94
   3   7  -3  180.11    3.87
  -3  -7   3  187.12    4.61
   3  -7  -3  231.55    4.43
   3   7  -3  248.46    2.64
   0  10  -2    3.79    1.38
   0 -10  -2    4.27    1.61
   0 -10   2    2.98    1.17
   0 -10  -2    4.00    1.33
   0 -10   2    3.46    2.00
   0 -10  -2    3.73    0.76
   0  10  -2    3.63    2.06
   0 -10  -2    3.62    1.24
   0  10   2    3.53    1.91
   0  10   2    2.38    1.12
   0 -10   2    4.24    2.38
   0  10  -2    4.58    1.19
   0  10  -2    4.38    1.39
   0 -10   2    4.56    1.71
   0 -10  -2    4.81    0.91
   3   5  -5    3.30    1.53
  -3  -5   5    3.22    1.36
   3  -5  -5    3.95    1.94
  -3   5   5    2.72    0.83
   3  -5  -5    3.56    1.65
   3   5  -5    2.95    1.24
  -3   5   5    3.15    1.92
  -3  -5   5    3.19    1.20
   3  -5  -5    3.64    1.27
  -3  -5   5    2.59    0.86
   0  -6  -6  307.47    5.07
   0   6  -6  295.64    5.51
   0  -6   6  292.92    4.67
   0  -6  -6  335.56    4.04
   0   6   6  320.21    5.02
   0   6   6  295.44    2.92
   0  -6   6  308.38    5.41
   0   6   6  305.36    3.36
   0   6  -6  283.79    5.43
   0  -6   6  322.70    6.16
   4   2  -4   10.09    1.32
  -4  -2   4   16.81    1.22
  -4  -2   4   13.97    1.18
  -4  -2   4   15.17    1.29
  -4   2   4   13.62    1.89
  -4  -2   4   13.90    2.37
   4   2  -4   16.15    1.56
   4  -2  -4   15.84    1.87
  -4   2   4   15.37    1.58
   4   2  -4   11.67    1.17
   4  -2  -4   16.24    1.44
  -4   2   4   13.45    1.48
   4  -2  -4   12.46    1.60
   3  -3   4   55.78    2.16
   3  -3   4   48.99    2.06
  -3  -3  -4   65.72    1.77
   3   3   4   53.53    2.27
  -3   3  -4   76.46    3.04
   3   3   4   65.22    1.90
   3   3   4   57.68    1.77
  -3   3  -4   53.65    2.39
   3   3   4   79.44    2.16
   3  -3   4   55.31    2.33
  -3   3  -4   58.45    3.33
  -3  -3  -4   61.65    1.87
   1  -9   3  127.29    3.61
  -1  -9  -3  131.02    1.85
   1  -9   3  118.92    2.76
   1   9   3  161.65    3.42
   1   9   3  150.59    3.42
   1   9   3  136.51    3.66
   1  -9   3  148.51    4.32
  -1  -9  -3  141.87    3.57
  -1   9  -3  124.00    3.65
   1  -9   3  145.50    3.79
  -1   9  -3  138.67    2.84
  -1  -9  -3  176.59    3.49
  -1   9  -3  129.02    3.63
   4  -4   0    0.82    1.41
  -4   4   0    0.77    1.17
   4   4   0    0.65    1.61
   4   4   0    0.89    0.79
  -4   4   0    2.37    2.38
   4   4   0    0.90    0.90
  -4   4   0    1.30    0.91
   4  -4   0    0.90    0.90
   4   4   0    0.41    1.72
   2   9   1  670.28    6.50
   2   9   1  532.81    4.67
  -2  -9  -1  777.77    6.10
   2   9   1  597.54    6.44
   2   9   1  693.44    4.94
  -2   9  -1  598.64    7.51
   2  -9   1  543.99    6.52
  -2   9  -1  640.21    5.52
   2  -9   1  567.81    5.90
   4   3   1  508.47    6.71
   4  -3   1  403.97    4.74
  -4   3  -1  366.63    4.76
   4   3   1  458.32    6.80
   4   3   1  457.40    4.36
  -4   3  -1  475.12    7.41
  -4   3  -1  426.26    4.61
   4  -3   1  414.85    5.27
   4   3   1  406.69    3.36
   1  10   1    0.13    1.00
   1 -10   1    0.83    1.34
  -1 -10  -1    0.28    1.26
  -1 -10  -1    0.37    1.16
  -1  10  -1    0.18    1.18
   1  10   1    0.64    1.25
  -1 -10  -1    0.16    1.70
  -1 -10  -1    0.67    1.13
  -1  10  -1    0.54    2.30
   1 -10   1    0.54    1.87
  -1  10  -1    0.61    1.01
   1 -10   1    0.48    1.30
   1  10   1    1.05    1.02
  -1 -10  -1    0.41    1.24
  -1  10  -1    0.96    1.39
   1  10   1   -0.13    1.66
  -2  -8   4  392.46    5.51
   2   8  -4  347.93    4.21
   2  -8  -4  302.36    4.36
  -2  -8   4  275.89    3.31
  -2   8   4  323.73    4.87
  -2   8   4  283.14    5.06
   2  -8  -4  316.69    3.73
   2   8  -4  235.85    4.70
  -2  -8   4  285.80    4.33
   2  -8  -4  342.13    4.76
  -2  -8   4  178.09    2.10
   2  -8  -4  317.43    5.36
  -2  -8   4  213.89    5.24
   2   8  -4  301.69    4.26
   2   8  -4  278.37    4.87
  -2  -7   5   19.13    1.29
  -2  -7   5   20.89    1.64
  -2  -7   5   19.93    2.64
  -2   7   5   25.95    2.51
  -2   7   5   25.75    1.95
   2   7  -5   11.06    1.22
   2   7  -5   25.67    1.91
   2  -7  -5   31.15    2.16
   2  -7  -5   25.69    1.54
  -2  -7   5   28.01    2.16
   2  -7  -5   29.51    1.96
   2   7  -5   22.20    1.86
  -3   3   6  912.32    7.49
  -3   3   6  844.44    9.41
   3  -3  -6  920.18    8.97
   3   3  -6  634.03    5.48
   3  -3  -6  815.83    7.85
  -3  -3   6  783.09    6.82
   3  -3  -6  852.84    6.46
  -3   3   6  685.56    7.12
  -3   3   6  824.14    6.12
  -3  -3   6  685.73    6.00
  -3  -3   6  824.36    9.49
   3   3  -6  677.86    7.48
  -3  -3   6  850.45    7.75
  -1  -5  -6  140.18    1.94
  -1  -5  -6  133.59    3.29
   1   5   6  163.67    3.21
   1  -5   6  120.73    4.39
  -1   5  -6  131.91    4.28
   1   5   6  153.94    3.59
   1  -5   6  119.25    3.50
  -1  -5  -6  159.51    2.87
   1   5   6  139.80    2.14
   1   5   6  136.15    3.29
   1  -5   6  137.45    3.80
  -2   0  -6  238.59    4.36
   2   0   6  233.40    4.14
  -2   0  -6  248.66    4.14
  -2   0  -6  243.99    3.65
   2   0   6  233.09    4.16
   4   0   2   64.36    2.19
   4   0   2   59.94    1.91
   2   5   5  542.96    5.80
   2   5   5  500.27    3.16
   2   5   5  515.59    4.43
   2  -5   5  453.14    6.08
   2   5   5  496.56    5.86
   2   5   5  463.06    5.52
  -2   5  -5  459.17    7.09
  -2  -5  -5  477.90    5.45
  -2   5  -5  461.20    6.60
   2  -5   5  376.78    5.17
   2  -5   5  463.18    6.05
  -1 -10   2  395.09    6.07
  -1 -10   2  419.05    5.66
   1 -10  -2  366.15    3.67
  -1 -10   2  362.98    5.03
   1  10  -2  300.71    4.92
   1  10  -2  316.59    5.01
   1  10  -2  333.07    4.42
  -1 -10   2  261.94    3.30
   1 -10  -2  325.20    4.53
  -1  10   2  330.08    4.43
   1  10  -2  351.76    4.90
  -1  10   2  313.13    5.39
   1 -10  -2  339.57    3.44
   1 -10  -2  358.51    5.18
   1  10  -2  353.61    4.35
  -1   4   7    1.29    1.56
   1  -4  -7    1.49    1.34
   1  -4  -7    1.61    2.31
  -1  -4   7    1.72    1.68
   1   4  -7    1.27    1.35
  -1   4   7    0.91    0.95
  -1  -4   7    0.88    1.59
  -1  -4   7    1.00    1.51
  -1  -4   7    1.55    2.36
  -1   4   7    1.39    1.58
  -1   4   7    1.33    1.62
   1  -4  -7    1.96    1.60
   1  -7   5  176.85    4.19
   1   7   5  249.72    5.11
   1   7   5  194.42    3.75
   1   7   5  180.52    1.69
   1   7   5  198.40    4.23
  -1  -7  -5  239.52    4.48
  -1   7  -5  185.40    4.66
  -1  -7  -5  190.18    3.95
   1  -7   5  156.88    3.69
   4  -4  -3    1.78    1.77
  -4   4   3    1.27    1.19
   4  -4  -3    1.35    1.19
  -4  -4   3    1.35    0.78
  -4   4   3    1.09    2.08
   4   4  -3    0.94    1.32
  -4   4   3    0.94    1.26
   4  -4  -3    1.33    1.20
   4   4  -3    0.95    0.77
  -4  -4   3    0.66    2.02
  -4  -4   3    1.12    0.91
  -2  -1  -6  157.87    3.28
  -2   1  -6  153.16    3.47
  -2  -1  -6  145.64    2.73
   2   1   6  151.87    3.40
   2  -1   6  148.20    3.47
   2   1   6  149.32    3.21
  -2   1  -6  138.58    3.45
   2  -1   6  157.49    3.73
   2   1   6  159.04    4.00
  -2  -1  -6  159.43    3.68
   2   1   6  143.64    3.32
   2  -1   6  128.62    3.30
  -2   1  -6  150.04    3.04
  -4   1  -2  154.45    2.70
   4   1   2  176.75    3.18
   4  -1   2  152.03    2.82
  -4   1  -2  201.39    5.62
  -4  -1  -2  210.36    6.34
   4   1   2  158.29    2.77
   4   1   2  152.15    2.20
  -4  -1  -2  102.52    1.46
  -4   1  -2  142.48    2.61
  -4  -1  -2   94.31    1.43
   4  -1   2  168.27    3.39
  -2   3   7  163.03    3.84
  -2   3   7  147.61    3.80
   2  -3  -7  190.60    4.44
  -2   3   7  166.60    4.20
  -2  -3   7  153.83    2.33
  -2   3   7  164.99    2.86
   2   3  -7  174.39    4.28
  -2  -3   7  193.76    3.98
  -2  -3   7  179.89    5.18
  -2  -3   7  134.18    3.27
   2  -3  -7  203.08    4.51
   2  -8   3   26.82    1.83
  -2   8  -3   23.65    1.95
  -2   8  -3   32.17    2.65
  -2  -8  -3   32.93    1.78
   2  -8   3   28.68    2.15
   2   8   3   33.11    2.16
   2   8   3   33.97    1.81
   2   8   3   32.31    1.76
   0   9  -4   10.34    1.71
   0  -9   4    9.53    1.96
   0   9   4   14.82    1.81
   0  -9  -4   14.04    1.07
   0   9   4   13.93    2.20
   0  -9  -4   14.33    1.62
   0   9  -4   15.12    2.02
   0  -9   4   14.39    2.81
   0  -9   4   16.40    2.19
   0  -9  -4   14.81    1.23
   0  -9  -4   17.00    2.11
  -1   0  -7 1366.98   11.42
   1   0   7 1246.45   10.48
   1   0   7 1421.65   10.89
  -1   0  -7 1332.34    9.57
  -1   0  -7 1315.80    8.80
   1   0   7 1266.81    8.79
  -4   3   4   22.92    2.24
   4   3  -4   15.41    1.29
   4  -3  -4   19.53    1.66
   4   3  -4   18.66    1.64
  -4  -3   4   20.50    1.31
   4  -3  -4   15.62    1.77
  -4   3   4   20.37    1.30
  -4   3   4   15.98    1.59
   4  -3  -4   16.59    1.96
  -4   3   4   15.27    1.53
  -4  -3   4   18.98    1.32
  -1  -8   5   56.91    3.32
  -1   8   5   91.10    3.30
  -1  -8   5   79.34    3.15
  -1  -8   5   63.10    2.29
   1   8  -5   62.74    2.82
   1   8  -5   85.00    2.95
   1  -8  -5   72.90    2.01
   1   9  -4  512.95    7.02
   1   9  -4  397.59    5.22
   1   9  -4  549.49    6.19
   1   9  -4  493.14    5.62
   1  -9  -4  504.36    5.18
  -1   9   4  477.51    6.83
  -1   9   4  506.33    5.89
  -1  -9   4  442.55    6.95
   1  -9  -4  498.91    3.03
  -1  -9   4  395.96    3.85
  -1  -9   4  409.92    5.04
  -1  -9   4  548.93    6.80
   1  -9  -4  489.46    4.28
   1   1   7    2.61    1.58
  -1  -1  -7    2.88    1.43
   1   1   7    2.06    2.30
  -1   1  -7    2.39    1.59
  -1  -1  -7    2.52    1.22
  -1   1  -7    2.28    1.55
   1   1   7    2.79    1.64
  -1  -1  -7    1.69    1.57
  -1   1  -7    2.17    1.30
   1  -1   7    1.18    2.72
   1  -1   7    2.79    1.75
   0  -8  -5  297.01    3.44
   0   8   5  274.85    4.45
   0  -8   5  261.09    4.42
   0   8   5  296.13    5.31
   0  -8   5  269.50    5.85
   0  -8  -5  280.73    5.04
   0   8  -5  301.94    5.36
   3  -8  -1   46.60    1.71
   3   8  -1   54.45    2.06
  -3  -8   1   41.92    2.86
  -3  -8   1   52.86    1.41
   3   8  -1   54.62    2.00
   3  -8  -1   45.46    2.34
   3   8  -1   49.57    2.06
   3   8  -1   42.40    2.29
   0  -4  -7  155.42    2.82
   0   4   7  150.39    3.59
   0  -4  -7  150.69    3.76
   0  -4   7  133.42    3.76
   0   4   7  139.96    2.52
   0  -4  -7  159.67    3.39
   0   4  -7  144.50    4.20
   0  -4   7  156.88    4.09
   0  -4   7  115.38    4.33
   0  -4   7  141.97    3.57
   0   4   7  135.71    3.16
   0   4   7  164.52    3.89
  -2   7  -4  195.03    4.36
   2  -7   4  227.92    4.78
  -2  -7  -4  248.24    4.21
   2   7   4  239.30    3.90
   2   7   4  261.68    4.13
   2   7   4  214.43    2.11
   2   7   4  228.84    4.25
  -2   7  -4  234.73    5.51
   2   9  -3  351.51    4.50
   2   9  -3  318.45    5.15
  -2  -9   3  361.09    5.09
  -2   9   3  359.79    4.98
   2   9  -3  377.35    4.58
   2  -9  -3  327.98    4.73
   2  -9  -3  349.95    3.42
  -2  -9   3  336.80    6.21
   2  -9  -3  329.28    5.51
   2   9  -3  317.15    4.83
   2   9  -3  309.01    5.11
  -2  -9   3  275.98    3.68
   2  -9  -3  343.63    3.73
   4  -5  -1  444.09    5.64
  -4   5   1  489.95    7.06
  -4  -5   1  456.60    3.38
   4   5  -1  478.24    4.32
   4   5  -1  383.18    5.52
   4  -5  -1  441.97    5.54
   4   5  -1  564.54    6.59
  -4   5   1  365.62    5.25
   4  -5  -1  389.34    4.51
   2   2   6  112.10    3.00
   2   2   6  106.07    3.24
   2  -2   6   88.42    2.79
  -2   2  -6  126.97    5.34
  -2   2  -6   96.60    3.19
  -2  -2  -6  106.61    2.71
  -2   2  -6  103.89    3.11
  -2  -2  -6  109.44    2.43
  -2  -2  -6  103.70    2.91
   2  -2   6   98.70    3.13
   2  -2   6   91.58    3.00
   2   2   6  101.43    2.95
   2   2   6  105.89    2.60
  -4   2  -2  340.26    4.83
   4  -2   2  305.09    4.02
   4   2   2  332.97    3.97
  -4   2  -2  370.09    6.94
   4   2   2  351.80    4.12
  -4   2  -2  280.89    3.63
   4  -2   2  322.59    4.69
   4   2   2  341.20    3.23
  -4   2  -2  292.21    4.04
   4  -5  -2    7.05    2.08
   4  -5  -2    9.14    1.42
  -4   5   2    6.12    1.43
  -4   5   2    9.55    2.15
   4  -5  -2    8.30    1.36
   4   5  -2    8.44    1.28
  -4  -5   2    9.10    0.91
   4   5  -2    5.67    1.01
   3  -4   4  185.24    3.60
   3   4   4  241.57    3.27
  -3  -4  -4  246.37    3.40
   3  -4   4  225.60    4.18
   3   4   4  235.24    2.72
  -3   4  -4  209.52    4.29
   3   4   4  291.96    5.03
   3   4   4  301.69    3.84
  -3   4  -4  249.01    5.88
   3  -4   4  227.99    4.23
   4  -4   1  225.42    4.04
  -4   4  -1  217.15    3.54
   4   4   1  271.49    3.27
  -4   4  -1  279.76    6.22
   4   4   1  243.01    5.06
  -4   4  -1  205.91    3.94
   4  -4   1  215.53    3.40
   4   4   1  277.68    5.31
  -2   6   6  155.40    4.07
   2  -6  -6  166.99    3.69
  -2  -6   6  114.72    2.66
   2  -6  -6  185.40    3.72
  -2   6   6  203.86    4.69
  -2   6   6  152.04    2.60
   2  -6  -6  156.76    4.02
   2  -6  -6  150.70    3.14
  -2  -6   6  161.02    3.87
   2   6  -6  127.67    3.72
   3   8   0   16.25    1.97
  -3   8   0   22.59    2.79
   3   8   0   23.26    1.39
   3  -8   0   18.46    1.33
   3   8   0   22.44    1.66
  -3  -8   0   18.64    0.64
  -3   8   0   19.76    1.65
  -1  10  -2  140.49    2.80
   1  10   2  151.82    3.73
   1 -10   2  144.52    4.04
   1 -10   2  118.98    2.89
   1 -10   2  143.30    3.66
   1  10   2  127.25    3.50
  -1  10  -2  139.13    3.92
  -1 -10  -2  112.51    1.51
  -1 -10  -2  137.73    3.60
  -1  10  -2  148.19    3.89
   1  10   2  134.23    2.78
  -1 -10  -2  109.91    2.19
   3   8  -2   18.98    1.43
   3  -8  -2   16.74    1.68
  -3  -8   2   17.78    2.24
   3   8  -2   13.39    1.79
   3   8  -2   21.13    1.65
  -3  -8   2   20.41    1.38
   3  -8  -2   18.33    1.25
  -3   8   2   15.47    1.64
   3   8  -2   17.37    1.52
   3  -8  -2   15.50    1.63
   3   8  -2   17.74    1.59
   3   7   2    5.57    1.39
  -3   7  -2    4.79    1.53
   3   7   2    7.46    1.24
  -3   7  -2    5.45    2.20
   3  -7   2    6.51    1.54
   3   7   2    5.75    1.64
  -3   7  -2    4.48    1.27
   1  -2   7  222.30    4.33
   1   2   7  242.45    4.49
  -1   2  -7  216.45    4.60
  -1  -2  -7  256.56    3.77
   1   2   7  239.44    4.76
   1   2   7  216.51    3.55
  -1  -2  -7  257.33    4.19
   1  -2   7  203.68    5.14
  -1  -2  -7  231.39    4.49
  -2  -9  -2    5.18    1.32
   2   9   2    4.57    1.24
   2  -9   2    4.34    1.36
  -2  -9  -2    4.43    1.27
   2   9   2    4.15    1.67
  -2   9  -2    3.38    2.07
   2   9   2    4.80    1.18
  -4   0   5    0.21    2.01
   4   0  -5   -0.07    1.00
  -4   0   5   -0.17    1.21
  -4   0   5   -0.24    0.92
   4   0  -5   -0.24    1.38
  -4   0   5    0.11    1.14
  -3   4   6   49.65    2.61
   3  -4  -6   51.81    2.33
  -3  -4   6   47.91    2.17
  -3  -4   6   54.30    2.32
  -3   4   6   49.06    1.65
   3  -4  -6   61.96    3.19
  -3  -4   6   40.47    1.79
  -3   4   6   50.86    2.52
  -3  -4   6   49.46    3.17
   3   4  -6   39.66    2.15
   3  -4  -6   58.91    2.36
   4   5   0  133.85    2.36
   4  -5   0  111.05    2.99
  -4   5   0   98.99    3.02
   4   5   0  107.26    3.30
  -4   5   0  115.52    3.73
   4   5   0  143.37    3.70
  -4   5   0  117.15    2.88
   3  -6   3  844.19    7.58
   3   6   3  901.22    7.70
  -3   6  -3  762.10    7.76
   3   6   3  912.95    6.98
   3   6   3  863.02    5.11
   3   6   3  805.63    6.89
   3  -6   3  798.99    7.82
  -3   6  -3  939.25   10.53
   3   7  -4  379.92    4.93
  -3  -7   4  374.48    4.69
  -3   7   4  388.73    6.11
   3  -7  -4  395.72    6.18
   3   7  -4  296.83    4.71
  -3  -7   4  318.23    4.35
  -3   7   4  353.66    5.16
   3  -7  -4  338.47    5.41
   3  -7  -4  367.63    5.36
  -3  -7   4  270.86    5.80
   0 -10  -3   23.16    2.11
   0 -10  -3   21.67    1.91
   0  10  -3   21.57    1.89
   0 -10  -3   22.41    1.45
   0  10  -3   24.91    1.73
   0  10   3   19.08    2.40
   0  10  -3   24.17    2.38
   0 -10   3   20.11    2.31
   0 -10   3   25.95    2.25
   0 -10   3   25.40    2.82
   0  10   3   18.98    1.65
   0 -10   3   18.58    1.54
   0 -10  -3   21.99    1.12
   4  -1  -5    3.67    1.19
  -4  -1   5    2.26    1.21
  -4   1   5    2.66    1.55
  -4  -1   5    3.17    1.17
  -4  -1   5    2.07    2.40
  -4  -1   5    3.75    1.01
   4   1  -5    2.93    1.49
   4   1  -5    3.46    1.19
   4  -1  -5    2.46    1.53
  -4  -1   5    1.96    1.09
  -4   1   5    2.87    1.30
  -4   1   5    2.70    1.31
   3   6  -5  392.25    5.11
  -3  -6   5  400.88    5.13
  -3   6   5  435.45    6.07
   3  -6  -5  377.78    5.24
  -3   6   5  390.38    4.01
  -3  -6   5  462.42    5.61
   3  -6  -5  415.40    5.96
  -3  -6   5  326.70    6.32
  -3  -6   5  325.10    2.69
   3   6  -5  319.87    5.18
   3  -6  -5  450.79    6.29
   1   7  -6    2.82    2.04
   1   7  -6    2.14    1.52
   1  -7  -6    4.35    1.61
  -1   7   6    4.35    2.07
  -1  -7   6    2.30    1.30
  -1  -7   6    2.65    1.62
  -1   7   6    3.42    0.81
  -1   7   6    3.76    1.52
   1  -7  -6    3.39    1.27
   2   4  -7   -0.04    1.33
  -2  -4   7    0.11    1.31
  -2  -4   7    0.35    1.47
  -2   4   7    0.14    1.88
   2  -4  -7   -0.16    1.94
  -2  -4   7    0.03    2.32
  -2  -4   7    0.25    0.73
  -2   4   7    0.49    0.89
   2  -4  -7    0.01    1.17
  -2   4   7   -0.09    1.76
  -2   3  -6   66.08    4.18
  -2  -3  -6   66.87    2.20
   2  -3   6   53.06    2.55
   2   3   6   67.51    2.53
   2   3   6   59.93    1.95
   2   3   6   58.74    2.55
   2  -3   6   56.62    2.68
  -2  -3  -6   61.04    2.33
   2   3   6   63.48    2.71
  -2   3  -6   61.44    2.71
  -2  -3  -6   66.54    1.93
  -4   3  -2   67.49    2.18
   4  -3   2   71.23    2.53
  -4   3  -2   78.98    3.86
   4   3   2   78.17    2.05
   4  -3   2   67.46    2.09
  -4   3  -2   67.56    2.39
   4   3   2   82.42    2.06
   1  10  -3  182.75    3.48
   1  10  -3  167.46    3.82
  -1  10   3  165.15    3.41
  -1 -10   3  205.18    4.46
   1 -10  -3  185.86    3.41
   1 -10  -3  180.56    2.58
   1 -10  -3  234.38    3.56
   1  10  -3  170.42    3.38
   1  10  -3  184.41    3.96
  -1 -10   3  213.18    5.17
  -1  10   3  158.78    4.29
   1 -10  -3  206.01    2.52
  -1 -10   3  135.79    2.44
  -1 -10   3  196.72    3.81
  -1  -5   7    2.27    1.67
  -1   5   7    2.88    0.94
  -1  -5   7    3.07    1.74
  -1  -5   7    3.13    1.78
   1  -5  -7    3.11    2.47
   1  -5  -7    3.32    1.50
  -1  -5   7    1.31    2.43
   1   5  -7    2.61    1.52
  -1   5   7    2.49    1.59
  -1   5   7    3.11    1.68
  -1   5   7    3.08    1.87
   4  -4  -4  459.99    5.60
  -4  -4   4  510.14    5.05
   4  -4  -4  421.63    5.91
  -4  -4   4  454.56    4.60
  -4  -4   4  261.20    6.22
   4   4  -4  339.87    4.35
   4   4  -4  437.47    4.85
  -4   4   4  358.73    5.03
  -4   4   4  391.43    5.60
  -4   4   4  541.78    6.82
  -4   5   3  238.94    4.24
   4  -5  -3  318.02    4.89
   4   5  -3  318.30    4.10
  -4  -5   3  303.03    3.29
  -4   5   3  268.71    4.60
   4  -5  -3  274.58    4.60
  -4   5   3  344.97    5.76
   4  -5  -3  287.33    4.66
  -4  -5   3  308.06    3.56
   4   5  -3  221.24    3.15
  -4  -5   3  209.56    5.62
   0  11   0   -0.12    1.26
   0 -11   0    0.47    1.38
   0  11   0   -0.39    1.92
   0  11   0   -0.19    1.18
   0 -11   0    0.11    1.93
   0 -11   0    0.32    1.45
   0  -7   6   74.14    2.92
   0  -7  -6   87.06    3.07
   0   7  -6   80.29    3.37
   0  -7   6   82.38    3.86
   0  -7   6   81.92    3.40
   0   7   6   81.63    2.84
   0   7  -6   82.88    3.47
   0  -7  -6   85.41    2.29
   0   7   6   79.69    1.61
  -4  -2   5    2.23    1.09
  -4   2   5    2.32    0.98
  -4  -2   5    0.02    2.40
  -4  -2   5    1.94    1.16
   4   2  -5    1.44    1.16
   4  -2  -5    1.98    1.58
  -4   2   5    2.35    1.33
  -4   2   5    1.89    1.87
   4  -2  -5    3.36    1.22
   4  -2  -5    2.24    1.47
   4   2  -5    2.28    1.06
  -4   2   5    1.97    1.39
  -4  -2   5    3.32    1.06
   3   0   5  106.53    2.88
  -3   0  -5  123.71    3.26
  -3   0  -5  120.27    3.05
   3   0   5  105.20    2.65
   3   0   5  104.70    2.94
   1   6   6  165.36    3.73
   1  -6   6  154.79    4.20
  -1  -6  -6  158.15    3.70
  -1   6  -6  130.17    4.43
   1  -6   6  145.86    3.93
   1   6   6  154.19    1.97
   1  -6   6  153.89    4.79
   1   6   6  186.03    4.08
  -1  -6  -6  183.71    2.97
   1   6   6  162.59    3.85
   3   8   1   82.82    2.67
   3   8   1   86.11    1.99
   3  -8   1   69.62    2.66
  -3   8  -1   75.34    3.51
   3   8   1   96.96    2.19
  -3   8  -1   72.28    2.76
   3  -8   1   70.09    2.37
  -1  -3  -7   28.26    1.95
  -1   3  -7   26.71    2.13
   1   3   7   29.51    2.12
   1   3   7   25.09    1.58
  -1  -3  -7   26.59    1.91
   1   3   7   25.69    2.44
   1  -3   7   26.41    2.27
  -1  -3  -7   26.53    1.51
   1  -3   7   24.11    3.24
  -2  -6  -5  271.15    4.46
   2   6   5  301.64    3.51
   2  -6   5  237.25    4.64
  -2   6  -5  216.98    4.77
  -2  -6  -5  267.59    2.20
  -2   6  -5  238.39    5.55
   2   6   5  267.65    4.60
   2   6   5  288.49    4.43
   2  -6   5  239.45    4.78
   2   6   5  288.55    4.98
   3  -1   5  232.67    3.96
   3   1   5  303.80    4.26
   3   1   5  273.76    4.05
   3  -1   5  277.01    4.45
   3   1   5  273.88    4.17
   3  -1   5  260.96    4.36
  -3  -1  -5  287.35    4.36
  -3   1  -5  301.98    4.78
  -3  -1  -5  304.57    4.33
  -3   1  -5  253.38    4.33
  -3   1  -5  358.83    8.81
  -2 -10   1  185.73    3.19
   2  10  -1  156.16    3.57
   2 -10  -1  173.15    3.24
   2  10  -1  163.31    3.59
  -2  10   1  162.85    4.31
   2  10  -1  173.78    3.68
  -2 -10   1  182.32    3.61
   2 -10  -1  148.58    4.01
  -2 -10   1  164.51    3.79
   2 -10  -1  160.94    3.68
   2  10  -1  179.21    3.73
   3   8  -3  553.57    4.30
  -3   8   3  489.10    6.80
  -3  -8   3  497.74    5.03
   3   8  -3  503.45    5.20
   3  -8  -3  427.14    6.03
  -3   8   3  521.71    6.21
   3  -8  -3  499.02    4.77
   3   8  -3  399.59    5.86
   3  -8  -3  454.37    5.69
  -3  -8   3  345.99    6.18
   3  -8  -3  517.22    7.02
   3   8  -3  377.60    5.25
   0  11   1  195.25    3.46
   0  11  -1  183.74    2.99
   0  11   1  175.21    3.11
   0  11   1  130.84    3.82
   0 -11  -1  206.95    3.67
   0 -11   1  136.57    3.19
   0 -11   1  181.09    4.24
   0 -11  -1  153.43    4.06
   0  11  -1  148.70    3.90
   0 -11   1  173.27    3.80
   0  11  -1  143.32    3.91
   0  11  -1  174.59    3.45
   0 -11  -1  173.59    3.40
   0 -11  -1  139.29    3.33
  -2 -10   0    1.98    1.22
  -2  10   0    3.18    2.05
   2 -10   0    2.63    1.48
  -2 -10   0    2.77    1.61
   2  10   0    3.31    1.40
   2  10   0    2.82    0.90
   2 -10   0    3.58    1.21
  -2 -10   0    2.62    1.13
   2  10   0    3.04    1.26
   2  10   0    2.44    1.75
   0  -5  -7    2.33    1.22
   0   5   7    2.63    1.85
   0  -5   7    1.87    1.94
   0   5  -7    1.50    1.47
   0   5   7    2.63    1.61
   0   5   7    1.33    0.95
   0   5  -7    1.73    3.10
   0  -5  -7    2.26    1.08
   0  -5   7    1.38    1.48
   0  -5   7    1.30    1.80
   0   5   7    2.67    1.90
   0  -5  -7    1.99    1.64
   0  -5   7    1.86    2.59
   3   0  -7  757.75    6.52
  -3   0   7  906.01    7.23
  -3   0   7  991.27    6.16
  -3   0   7  853.75    9.57
   3   0  -7  783.83    8.30
  -3   0   7  872.99    8.08
   1   9   4  225.66    3.85
   1   9   4  208.46    4.40
  -1  -9  -4  226.55    4.56
   1   9   4  241.84    4.36
  -1   9  -4  224.44    4.86
  -1  -9  -4  198.09    2.17
   1  -9   4  213.63    5.39
  -1   9  -4  180.90    4.44
  -1   0   8    1.29    1.43
  -1   0   8    1.05    2.53
  -1   0   8    0.82    1.60
  -1   0   8    1.29    2.13
  -1   0   8    1.52    1.33
   1   0  -8    1.11    1.53
   2  -8  -5    3.64    1.20
   2   8  -5    4.62    1.58
  -2   8   5    4.30    2.10
   2  -8  -5    5.46    1.84
  -2  -8   5    5.83    1.83
  -2   8   5    4.44    1.52
   2  -8  -5    5.61    1.27
  -2  -8   5    3.41    2.32
   2  -8  -5    4.58    1.47
  -2  -8   5    3.56    1.06
   3   5   4   46.26    2.22
  -3   5  -4   42.03    3.39
  -3   5  -4   35.01    2.11
  -3  -5  -4   49.34    1.81
   3  -5   4   40.70    2.19
   3   5   4   43.43    1.56
   3  -5   4   39.98    2.22
   3   1  -7    0.16    1.41
  -3  -1   7    0.98    2.08
  -3   1   7    0.80    1.95
  -3   1   7    0.27    1.06
   3  -1  -7    1.46    1.30
  -3  -1   7    0.63    1.49
   3   1  -7    0.67    1.17
  -3  -1   7    1.04    1.26
  -3   1   7    0.38    1.68
  -3  -1   7    0.68    1.12
   3  -1  -7    0.89    1.54
  -3   1   7    0.47    1.55
   4   5   1  187.73    4.19
   4   5   1  157.89    2.72
  -4   5  -1  222.26    5.69
   4   5   1  246.24    5.21
   4  -5   1  186.25    3.35
  -4   5  -1  197.79    3.85
  -4   5  -1  174.75    3.82
   4  -5   1  195.73    3.90
  -1   1   8  505.67    8.22
  -1  -1   8  438.47    5.07
  -1  -1   8  435.99    5.51
   1   1  -8  464.65    6.98
  -1   1   8  450.94    6.33
  -1   1   8  411.16    6.59
  -1   1   8  450.01    5.50
  -1  -1   8  456.74    5.99
  -1   1   8  448.74    5.47
  -1  -1   8  502.74    7.04
   1  -1  -8  466.93    6.50
   1  -1  -8  462.58    6.52
  -3   2  -5  206.16    4.15
  -3   2  -5  174.01    3.87
   3  -2   5  199.37    4.11
   3   2   5  220.60    3.69
   3   2   5  195.33    3.51
   3   2   5  202.02    3.43
  -3  -2  -5  259.22    4.17
   3  -2   5  177.78    3.63
  -3  -2  -5  183.15    3.31
  -3   2  -5  217.73    6.64
   3  -2   5  164.34    3.35
   4  -6  -1  232.84    3.66
  -4   6   1  257.38    5.44
   4  -6  -1  231.48    4.27
  -4  -6   1  257.45    2.53
   4   6  -1  215.58    4.37
  -4   6   1  223.40    4.52
   4  -6  -1  231.10    4.24
   4   6  -1  193.93    3.02
   2  -9  -4   14.99    1.00
  -2  -9   4    6.32    0.79
  -2   9   4   13.89    1.56
  -2  -9   4   11.39    2.59
   2   9  -4   11.75    1.83
  -2  -9   4   12.08    1.50
  -2  -9   4   11.95    1.55
   2  -9  -4   15.31    2.00
  -2  -9   4   15.34    1.99
   2  -9  -4   15.68    1.87
   2   9  -4   14.70    1.73
   2   9  -4    9.74    1.49
   2  -9  -4   13.05    1.49
   2  10  -2   44.08    2.16
   2  10  -2   47.07    2.19
   2 -10  -2   49.26    2.27
  -2  10   2   48.24    3.11
   2 -10  -2   46.99    2.45
   2  10  -2   44.05    2.93
  -2 -10   2   48.74    2.89
  -2  10   2   49.38    2.23
  -2 -10   2   59.00    2.30
   2  10  -2   54.21    2.02
   2  10  -2   48.59    2.26
  -2 -10   2   40.98    2.02
   2 -10  -2   55.84    1.79
  -4   0  -3    0.22    1.38
  -4   0  -3   -0.66    3.46
   4   0   3    0.24    1.23
  -4   0  -3   -0.12    0.81
   4   0   3    0.03    0.89
  -4  -3   5   26.50    1.44
  -4   3   5   27.81    2.04
  -4   3   5   24.56    1.88
  -4  -3   5   20.83    2.91
  -4   3   5   29.68    1.40
   4  -3  -5   25.19    1.81
  -4  -3   5   27.75    1.74
   4  -3  -5   28.73    2.17
  -4   3   5   34.09    2.54
  -4  -3   5   30.78    1.68
   4   3  -5   21.02    1.54
   1   8   5 1150.63    9.03
  -1  -8  -5 1084.07    4.91
  -1  -8  -5 1089.13    9.40
   1   8   5 1079.77    9.13
   1   8   5 1175.34    9.07
   1  -8   5 1079.97    9.92
  -1   8  -5  987.29   10.40
  -3   5   6   30.00    1.47
  -3  -5   6   18.47    1.49
  -3   5   6   23.58    1.96
  -3  -5   6   25.33    1.79
   3  -5  -6   29.80    2.15
  -3   5   6   28.36    2.52
   3  -5  -6   29.78    2.07
   3  -5  -6   32.42    2.76
  -3  -5   6   34.88    2.14
   3   5  -6   19.28    1.78
   4  -6  -2  425.42    5.75
  -4   6   2  408.86    5.98
  -4  -6   2  496.69    4.06
  -4   6   2  527.17    7.70
   4   6  -2  486.72    4.73
   4   6  -2  351.12    3.63
   4  -6  -2  451.28    5.83
  -1  11   0  210.87    4.31
  -1  11   0  208.11    4.66
   1  11   0  226.15    3.18
   1  11   0  178.48    4.02
   1 -11   0  213.85    4.14
  -1 -11   0  199.53    3.76
  -1 -11   0  201.82    3.62
   1  11   0  226.16    4.31
  -1 -11   0  248.07    4.08
  -1  11   0  218.27    3.87
   1 -11   0  230.51    4.32
  -1  11   0  254.92    3.38
   1 -11   0  195.62    3.83
   2   4   6  239.81    3.01
   2  -4   6  222.02    4.70
   2   4   6  255.24    4.21
  -2   4  -6  248.02    5.82
  -2  -4  -6  240.25    4.25
   2  -4   6  220.23    4.54
   2   4   6  283.73    4.64
   2   4   6  239.47    4.33
  -2   4  -6  222.65    4.77
  -2  -4  -6  275.43    3.61
  -4   4  -2   93.51    2.68
   4  -4   2   97.23    2.89
   4   4   2  103.22    2.27
   4  -4   2   92.37    2.49
  -4   4  -2   85.79    2.67
   4   4   2  105.13    3.72
   4   4   2  111.88    2.16
   4   1   3  211.61    3.51
  -4   1  -3  177.89    3.20
  -4   1  -3  233.27    4.18
  -4   1  -3  251.14    6.79
   4   1   3  186.61    3.10
   4  -1   3  186.17    3.27
  -4  -1  -3  169.96    2.61
  -4   1  -3  181.85    3.26
   4  -1   3  199.11    3.71
  -1 -11   1   59.69    2.02
   1 -11  -1   82.81    2.60
   1  11  -1   79.78    2.44
  -1  11   1   78.95    2.49
  -1  11   1   62.26    3.01
  -1 -11   1   76.97    2.81
   1 -11  -1   75.37    2.67
  -1 -11   1   84.64    3.19
   1  11  -1   63.29    2.89
  -1  11   1   73.94    2.35
  -1 -11   1   82.37    2.98
   1  11  -1   72.44    2.73
   1  10   3   47.44    2.22
   1 -10   3   49.93    3.66
  -1 -10  -3   36.95    1.26
   1  10   3   49.87    2.35
  -1 -10  -3   43.15    2.23
  -1  10  -3   38.26    2.33
   1  10   3   40.96    2.59
  -1  10  -3   46.09    3.04
   1 -10   3   36.49    2.00
  -1 -10  -3   58.54    2.58
   1 -10   3   45.13    2.65
  -3   2   7  339.00    5.63
  -3  -2   7  342.01    6.44
  -3  -2   7  254.01    4.24
  -3   2   7  311.84    6.05
  -3  -2   7  224.06    2.08
  -3   2   7  333.59    4.65
   3  -2  -7  355.71    5.83
   3   2  -7  269.64    5.03
   3   2  -7  268.10    4.25
  -3   2   7  337.64    4.24
   2  10   1    1.88    1.15
   2  10   1    2.78    1.28
  -2 -10  -1    0.67    0.53
   2  10   1    2.45    1.78
   2  10   1    1.99    1.06
  -2  10  -1    2.41    1.12
   2 -10   1    1.61    1.43
  -2 -10  -1    2.60    1.32
   2 -10   1    2.21    1.30
  -2  10  -1    1.72    2.25
   1   2  -8    0.49    1.39
  -1  -2   8    0.54    1.88
   1  -2  -8    0.66    1.32
  -1  -2   8    1.31    1.54
  -1   2   8    0.80    1.18
  -1  -2   8    1.09    2.38
   1  -2  -8    1.39    2.79
  -1  -2   8    0.76    2.17
  -1   2   8    1.20    2.26
  -1   2   8    1.35    1.79
   0   0   8  325.82    6.06
   0   0   8  333.45    4.91
   0   0   8  346.28    6.11
   2  -5  -7  439.20    6.40
   2  -5  -7  460.96    5.95
   2   5  -7  370.50    6.15
  -2   5   7  387.53    4.15
   2  -5  -7  397.64    4.74
  -2   5   7  407.26    6.18
  -2  -5   7  313.15    6.69
  -2   5   7  463.97    6.43
  -2  -5   7  323.69    4.92
   4   6   0   89.04    3.09
  -4   6   0  105.93    3.24
  -4   6   0  123.20    4.23
   4  -6   0  110.12    3.14
  -4   6   0  108.80    2.95
   4   6   0  115.03    2.49
   4  -6   0   96.44    2.42
   0 -11   2   29.01    1.95
   0 -11   2   39.16    2.98
   0  11  -2   37.54    1.76
   0  11  -2   34.43    2.25
   0 -11  -2   32.02    2.36
   0 -11  -2   31.25    1.22
   0  11  -2   33.89    2.04
   0  11  -2   39.95    2.99
   0 -11   2   38.98    2.45
   0 -11  -2   34.48    2.33
   0  11   2   33.44    1.89
   0  11   2   27.22    2.50
   0 -11  -2   37.05    1.83
   0 -11  -2   38.83    1.48
  -2  -7   6   83.26    2.39
   2  -7  -6  115.81    3.64
  -2   7   6  103.66    2.10
  -2   7   6  115.59    3.85
   2  -7  -6  117.95    3.17
  -2  -7   6  115.29    3.50
   2   7  -6   90.30    3.41
  -2   7   6  136.23    3.79
   1   4   7   13.42    2.06
  -1  -4  -7   10.74    1.74
   1   4   7    9.41    2.09
   1  -4   7    8.33    2.09
  -1   4  -7    7.57    1.76
   1   4   7    9.45    1.26
  -1  -4  -7    9.80    1.14
   1  -4   7    9.93    3.19
  -1   4  -7    8.68    3.51
  -1  -4  -7   10.05    1.51
   4  -5  -4  522.27    6.47
  -4  -5   4  383.46    7.34
   4  -5  -4  534.22    6.22
  -4  -5   4  582.30    5.25
   4   5  -4  438.98    5.09
   4  -5  -4  542.11    6.28
  -4   5   4  694.45    8.03
  -4   5   4  486.60    6.18
  -4   5   4  505.81    6.47
   4   5  -4  614.98    5.97
  -4  -5   4  596.51    5.41
   2   8   4  276.62    4.95
  -2   8  -4  261.67    5.88
  -2  -8  -4  264.50    4.50
   2  -8   4  273.01    5.35
   0  -1   8    0.80    1.56
   0  -1  -8    0.61    1.39
   0   1   8    0.13    2.05
   0  -1   8    0.22    1.50
   0  -1   8    0.37    2.12
   0  -1  -8    0.27    1.30
   0  -1   8    1.00    2.49
   0   1   8    0.12    1.30
   2   9   3  452.10    5.76
  -2   9  -3  389.87    6.22
   2   9   3  554.61    6.11
   2   9   3  514.41    5.17
   2  -9   3  432.95    5.74
  -2  -9  -3  504.97    6.28
  -2   9  -3  455.16    6.81
  -1  11  -1  140.76    2.65
  -1 -11  -1  129.57    3.03
  -1 -11  -1  117.27    2.60
  -1  11  -1  138.53    4.45
  -1  11  -1   94.84    3.31
   1  11   1  129.61    2.69
   1  11   1  112.57    3.53
   1 -11   1  135.67    3.98
  -1 -11  -1  138.91    2.61
   1 -11   1  139.73    3.67
   1 -11   1  119.98    3.18
   4  -2   3  170.05    3.57
  -4   2  -3  148.93    3.20
   4   2   3  171.36    2.93
   4   2   3  183.80    3.28
  -4   2  -3  155.60    3.33
  -4  -2  -3  122.03    1.87
  -4   2  -3  197.41    3.99
   4  -2   3  154.64    3.08
  -3  -3  -5   11.46    1.36
  -3   3  -5   10.88    2.79
   3   3   5   12.08    1.61
   3   3   5   11.88    1.97
   3  -3   5    8.80    1.41
   3   3   5   10.02    1.20
   3  -3   5   10.71    1.77
  -3  -3  -5    9.44    1.19
   3  -3   5    8.82    1.46
  -3   3  -5    9.55    1.48
  -1   9   5   17.21    1.87
   1   9  -5   10.72    1.68
  -1  -9   5   19.95    2.47
   1  -9  -5   16.72    1.47
   1  -9  -5   10.78    0.58
   1   9  -5   17.02    2.02
  -1  -9   5   14.37    2.00
  -1  -9   5   14.31    2.70
   1  -9  -5   17.54    1.52
   3   7   3  238.68    4.06
   3   7   3  192.48    3.74
   3  -7   3  171.96    4.01
  -3   7  -3  205.30    5.57
   3   7   3  184.26    2.36
  -3   7  -3  137.65    3.55
  -3  -7  -3  216.98    3.38
   0  -9  -5  299.83    3.37
   0  -9  -5  296.33    3.52
   0   9   5  315.07    5.32
   0  -9   5  300.14    6.25
   0   9  -5  308.83    5.48
   0  -9  -5  307.17    5.57
   0   9   5  290.28    5.35
  -1   6   7   55.11    1.65
  -1  -6   7   55.11    2.36
  -1  -6   7   56.11    2.91
   1   6  -7   52.29    3.51
  -1   6   7   58.30    2.98
   1  -6  -7   67.75    3.01
   1  -6  -7   56.87    2.32
   1   6  -7   52.70    2.77
  -1  -6   7   45.72    3.59
  -1   6   7   62.12    2.65
  -1   6   7   55.77    2.68
  -1  -6   7   46.88    2.33
  -2   0   8  316.04    4.39
  -2   0   8  331.87    5.55
  -2   0   8  344.72    4.76
   2   0  -8  331.65    5.67
  -2   0   8  304.05    6.03
   3  -9  -1   65.91    2.04
  -3  -9   1   56.66    3.00
   3  -9  -1   65.26    2.67
   3   9  -1   57.22    2.57
   3  -9  -1   57.39    2.58
  -3  -9   1   68.47    1.62
   3   9  -1   69.23    2.27
   3   9  -1   69.36    2.55
   4   6  -3   29.99    1.94
  -4   6   3   21.55    1.84
   4  -6  -3   28.91    1.88
   4  -6  -3   28.04    1.88
  -4  -6   3   29.26    1.43
  -4  -6   3   20.98    2.90
  -4  -6   3   28.18    1.37
  -4   6   3   33.34    2.87
  -3   8  -2    0.40    1.25
  -3   8  -2    0.84    2.33
   3  -8   2    0.68    1.18
  -3  -8  -2    0.71    1.03
   3   8   2    0.88    1.40
   3  -8   2    0.63    1.45
   3   8   2    1.19    1.54
   0  10   4   36.98    2.78
   0 -10  -4   43.28    1.71
   0  10  -4   28.73    2.26
   0  10  -4   39.93    2.71
   0 -10   4   46.00    2.88
   0 -10   4   40.83    3.26
   0 -10   4   31.25    1.76
   0 -10  -4   41.32    1.46
   0 -10  -4   42.55    2.59
   0 -10   4   35.67    2.57
   0  10   4   38.01    2.18
   3  -7  -5    1.05    1.25
  -3  -7   5    0.50    0.33
  -3  -7   5    0.93    1.16
   3   7  -5    0.78    1.38
  -3  -7   5    1.18    1.44
   3  -7  -5    1.60    2.16
   3  -7  -5    0.82    1.33
  -3  -7   5    0.34    2.22
  -3   7   5    0.66    2.17
  -1 -11   2  403.60    5.84
   1 -11  -2  388.13    5.25
  -1  11   2  324.77    5.66
   1  11  -2  301.00    5.16
   1 -11  -2  378.43    3.79
  -1  11   2  367.46    4.92
   1  11  -2  378.52    5.30
   1  11  -2  354.03    4.68
  -1 -11   2  339.25    4.36
   1 -11  -2  423.71    4.43
  -1 -11   2  425.61    6.63
   1  11  -2  367.60    4.45
  -1 -11   2  373.08    5.44
  -2  -1   8   16.17    1.76
  -2   1   8   14.55    2.33
  -2   1   8   15.03    1.90
  -2   1   8   11.12    2.06
  -2  -1   8   13.90    2.64
   2   1  -8   15.89    1.92
  -2  -1   8   15.16    2.36
  -2  -1   8   16.76    2.21
   2  -1  -8   13.43    1.60
  -2  -1   8   14.00    1.54
  -2   1   8   13.15    1.43
   0   2   8  618.09    7.69
   0  -2   8  565.38    8.49
   0   2   8  594.68    5.76
   0  -2   8  660.91    7.52
   0  -2   8  629.56    7.71
   0  -2  -8  627.66    6.09
   0  -2  -8  602.28    7.53
   0  -2   8  633.75    7.68
   0  -2  -8  654.79    6.91
   0   2   8  675.07    7.16
   3  -3  -7    0.07    1.17
  -3   3   7    0.65    1.92
   3   3  -7    0.22    1.36
  -3   3   7   -0.01    2.26
  -3   3   7    0.47    0.97
  -3  -3   7    0.42    1.42
  -3   3   7    0.66    1.83
   3  -3  -7    1.03    1.43
  -3  -3   7    0.59    2.31
  -1 -10   4    3.90    2.09
  -1 -10   4    3.62    2.53
   1  10  -4    3.14    1.44
  -1 -10   4    2.19    1.12
  -1  10   4    3.01    2.27
   1 -10  -4    4.00    1.30
  -1 -10   4    2.81    1.97
  -1  10   4    2.20    1.45
   1 -10  -4    3.38    1.06
   1 -10  -4    3.50    0.62
   1  10  -4    3.70    2.00
   3  -8  -4  160.80    4.39
  -3   8   4  146.24    4.28
  -3   8   4  112.15    3.18
   3   8  -4  131.95    3.17
  -3  -8   4   99.54    4.01
  -3  -8   4  109.97    2.72
  -3  -8   4  141.60    3.16
   3  -8  -4  134.08    3.89
   3   8  -4  108.92    3.21
   3  -8  -4  125.45    3.22
  -1  -3   8    1.03    2.46
  -1   3   8    1.18    1.87
   1  -3  -8    0.45    2.86
   1   3  -8    1.26    1.42
   1  -3  -8    1.85    1.39
  -1  -3   8    1.10    1.63
  -1  -3   8    0.12    1.63
  -1   3   8    0.33    2.09
  -1   3   8    1.18    1.24
  -1  -3   8    1.34    1.98
   3   9   0   73.30    2.56
  -3   9   0   72.40    3.50
   3   9   0   77.96    2.27
  -3   9   0   55.14    2.51
   3  -9   0   71.40    2.28
  -3  -9   0   61.21    0.99
  -4   4   5   56.01    2.49
  -4   4   5   75.72    3.17
  -4  -4   5   71.59    2.43
   4  -4  -5   65.81    2.58
  -4  -4   5   78.71    2.46
  -4  -4   5   70.17    1.80
   4   4  -5   54.47    2.23
   4  -4  -5   69.85    2.88
  -4   4   5   69.13    1.96
   3   9  -2  405.56    4.67
   3  -9  -2  362.05    5.37
   3   9  -2  311.88    5.23
   3   9  -2  411.94    5.50
   3  -9  -2  346.26    5.84
  -3  -9   2  424.34    4.43
   3  -9  -2  386.96    4.24
  -3  -9   2  257.58    5.28
   2 -10  -3   24.87    1.24
  -2 -10   3   20.45    1.81
   2  10  -3   24.70    1.76
   2  10  -3   17.41    1.83
   2  10  -3   18.71    2.89
  -2 -10   3   23.29    2.90
   2  10  -3   24.93    2.07
  -2  10   3   20.22    1.77
   2 -10  -3   23.00    1.75
  -2 -10   3   24.65    2.09
   2  10  -3   21.65    1.88
   2 -10  -3   21.82    2.00
  -4   0   6  711.18    6.72
   4   0  -6  594.78    5.97
  -4   0   6  812.29    8.00
  -4   0   6  976.96    6.15
   4   0  -6  759.54    7.67
  -4   0   6  828.85   10.40
   0  -6   7  218.80    5.84
   0  -6  -7  213.89    4.60
   0  -6  -7  242.60    4.00
   0   6  -7  195.26    4.74
   0   6   7  223.33    4.68
   0  -6  -7  235.99    2.98
   0  -6   7  190.95    4.04
   0  -6   7  220.97    4.92
   0   6   7  224.39    4.58
   0   6   7  188.04    2.68
   0   6  -7  184.82    5.08
  -1   8   6   33.35    2.36
   1   8  -6   26.01    2.36
  -1   8   6   26.94    1.29
  -1  -8   6   17.04    2.91
  -1   8   6   26.13    2.52
   1  -8  -6   25.53    1.68
  -1  -8   6   33.64    2.76
  -1  -8   6   22.01    2.08
   1   8  -6   24.45    2.28
   1   7   6    2.98    1.90
  -1  -7  -6    3.13    1.47
   1  -7   6    1.89    3.21
   1  -7   6    1.78    2.13
  -1  -7  -6    2.89    1.34
   1   7   6    1.72    1.95
  -1   7  -6    1.54    2.50
   4  -3   3  308.61    4.33
   4  -3   3  335.99    5.01
   4   3   3  325.44    3.85
  -4   3  -3  303.49    4.60
   2   7   5   10.49    1.89
  -2   7  -5    9.30    2.69
   2   7   5   10.05    1.55
   2   7   5   13.40    1.63
   2  -7   5    9.20    1.90
   2  -7   5    9.45    1.97
  -2  -7  -5   11.61    1.43
  -2   7  -5    7.64    1.72
   2  -2  -8  704.57    8.14
  -2   2   8  648.37    6.94
  -2   2   8  663.36    7.80
  -2  -2   8  585.54    8.86
  -2  -2   8  662.10    5.59
  -2  -2   8  748.06    6.59
  -2  -2   8  720.52    7.14
  -2   2   8  661.09    6.06
  -2   2   8  654.66    8.10
   2   2  -8  642.08    8.08
  -2  -2   8  523.15    6.69
  -4   1   6   72.52    2.71
  -4   1   6   58.87    2.34
  -4  -1   6   56.79    3.52
  -4  -1   6   74.85    2.79
  -4   1   6   63.86    2.60
   4   1  -6   65.59    2.52
  -4  -1   6   69.98    2.21
  -4   1   6   65.92    3.42
  -4  -1   6   61.23    2.26
   4  -1  -6   69.21    2.55
   4  -1  -6   55.41    2.48
   4   1  -6   46.89    2.15
   3   6   4   79.40    2.68
  -3   6  -4   54.66    2.79
   3  -6   4   66.62    2.72
   3  -6   4   59.85    2.50
   3   6   4   65.11    2.44
   3   6   4   78.21    1.99
  -3  -6  -4   77.62    2.21
  -3   6  -4   70.24    3.94
   4   6   1   74.55    3.01
  -4   6  -1   70.78    2.89
   4   6   1   64.45    2.08
  -4   6  -1   70.13    2.62
   2  -5   6  110.05    3.75
   2   5   6  140.63    3.40
   2   5   6  137.29    3.65
   2  -5   6  116.87    3.58
  -2   5  -6  115.47    4.53
   2   5   6  120.29    3.28
  -2  -5  -6  149.29    2.57
   2   5   6  130.70    3.52
  -2  -5  -6  119.72    3.09
  -2   5  -6  109.87    3.64
  -4   5  -2    0.53    1.04
   4  -5   2    0.79    1.38
   4   5   2    0.91    2.24
   4  -5   2    0.95    1.04
  -4   5  -2    1.04    1.37
   4   5   2    0.64    1.30
   0  -8  -6   90.08    2.31
   0  -8   6   74.27    2.88
   0  -8  -6   90.73    3.26
   0   8  -6   69.58    3.17
   0   8   6   85.52    1.70
   0   8   6   92.76    3.07
   0   8  -6   80.53    3.54
   2  10   2    0.32    1.24
   2 -10   2    0.67    1.54
   2  10   2    0.41    1.42
  -2 -10  -2    1.75    1.67
   2  10   2    0.19    1.86
   2 -10   2    0.55    1.32
  -2 -10  -2    0.20    1.16
  -2  10  -2    0.16    2.32
   1  11   2  173.15    3.28
   1 -11   2  171.66    4.12
   1  11   2  157.63    4.13
   1 -11   2  175.58    4.87
  -1 -11  -2  126.28    2.50
  -1  11  -2  161.30    3.02
  -1  11  -2  136.32    3.92
  -1 -11  -2  133.77    1.73
  -1  11  -2  162.03    4.39
  -1 -11  -2  159.42    4.18
  -3   6   6  103.38    3.64
   3  -6  -6  109.22    3.68
  -3  -6   6   73.71    2.60
  -3  -6   6  106.05    3.11
  -3  -6   6   74.28    2.05
   3  -6  -6  111.40    3.47
   3   6  -6   67.10    2.84
  -3   6   6   94.63    2.12
   3  -4   5   59.98    2.47
  -3  -4  -5   74.47    2.22
   3  -4   5   63.09    2.45
   3   4   5   79.49    2.21
  -3   4  -5   74.01    4.10
  -3  -4  -5   85.10    1.95
   3   4   5   76.31    2.78
   3  -4   5   69.78    2.91
  -3   4  -5   63.41    2.78
   0   3   8    9.76    2.42
   0   3   8   10.42    1.45
   0  -3   8    9.03    2.76
   0  -3  -8   11.72    1.49
   0  -3   8   10.71    2.48
   0   3   8   11.16    1.89
   0   3   8   11.50    1.98
   0  -3   8   11.47    1.97
   0  -3  -8   11.81    1.65
   0  -3   8    9.86    1.94
   0  -3  -8   13.40    2.40
  -1  -5  -7  349.74    3.41
   1  -5   7  338.44    5.89
   1   5   7  324.78    3.43
  -1  -5  -7  328.61    5.31
  -1   5  -7  373.85    7.74
  -1  -5  -7  378.31    4.63
  -1   5  -7  335.33    6.33
   1   5   7  337.15    5.33
   4   2  -6   55.99    2.36
  -4   2   6   82.62    2.97
  -4  -2   6   64.06    3.83
  -4  -2   6   60.71    2.09
  -4  -2   6   76.08    2.38
  -4  -2   6   68.01    2.62
   4  -2  -6   62.13    2.48
  -4   2   6   72.32    2.07
  -4   2   6   60.52    2.45
  -4  -7   1   42.57    1.27
   4  -7  -1   41.86    2.52
   4   7  -1   29.76    2.50
   4  -7  -1   34.29    1.69
  -4   7   1   31.57    2.92
   4   7  -1   35.30    1.67
   3   9   1  504.18    5.63
   3  -9   1  489.87    5.74
  -3   9  -1  483.55    7.38
   0 -11   3  420.70    4.86
   0 -11   3  599.88    7.37
   0 -11  -3  551.84    5.49
   0  11  -3  566.98    7.21
   0  11   3  488.04    7.05
   0 -11  -3  524.20    7.64
   0  11  -3  426.78    6.64
   0  11   3  512.75    6.61
   0 -11  -3  534.85    4.07
   0 -11   3  579.40    7.89
  -4   7   2   65.28    3.56
   4  -7  -2   61.48    2.09
   4  -7  -2   61.72    2.58
   4  -7  -2   57.05    2.52
  -4  -7   2   62.93    1.70
  -2   0  -7    0.25    1.55
   2   0   7    0.01    1.81
   2   0   7    0.26    1.79
   2   0   7    0.20    2.65
  -2   0  -7   -0.01    1.32
  -2   6   7    9.83    2.12
  -2   6   7    8.46    1.05
   2  -6  -7    9.39    2.08
  -2   6   7    8.89    2.26
   2   6  -7    5.66    1.78
  -2  -6   7    6.58    2.61
  -2  -6   7    8.91    1.84
   2  -6  -7   10.60    1.63
  -2  -6   7   10.37    2.14
  -3  -9   3    0.97    2.15
   3   9  -3    0.65    1.33
   3  -9  -3    1.48    0.95
   3  -9  -3    1.29    1.38
  -3   9   3    0.12    2.14
  -3  -9   3    1.33    1.33
  -3   9   3    1.84    1.51
   3  -9  -3    1.37    1.38
   3  -9  -3    1.35    2.17
  -3   4   7    3.60    2.14
   3  -4  -7    5.19    1.39
  -3   4   7    5.53    2.09
  -3  -4   7    4.90    2.48
  -3   4   7    4.67    1.00
   3   4  -7    3.70    1.56
  -3  -4   7    3.56    1.45
   3  -4  -7    5.40    1.51
  -3   4   7    4.19    1.83
  -3  -4   7    5.11    1.59
   5   0  -2    0.04    1.36
   5   0  -2    0.07    1.55
  -5   0   2    0.06    2.26
   1   4  -8    1.69    1.43
  -1  -4   8    1.12    1.77
  -1  -4   8    1.37    1.77
   1  -4  -8    2.30    2.81
  -1  -4   8    1.33    1.64
  -1  -4   8    2.07    2.60
  -1   4   8    1.27    1.02
  -1   4   8    1.86    1.81
  -1   4   8    1.46    1.85
  -1   4   8    1.88    1.74
   2  -3  -8   28.75    2.11
  -2   3   8   27.61    2.32
  -2  -3   8   22.37    2.92
  -2   3   8   29.45    1.72
  -2  -3   8   31.93    2.26
  -2  -3   8   28.70    2.07
   2   3  -8   23.71    2.26
   2  -3  -8   28.34    2.94
  -2   3   8   27.16    2.20
  -2  -3   8   20.91    2.08
  -2   3   8   26.61    2.50
  -2  -3   8   25.39    1.56
   4  -6  -4  600.39    7.16
   4   6  -4  626.28    6.11
   4  -6  -4  642.49    7.39
  -4  -6   4  623.98    5.71
  -4   6   4  653.55    8.07
   4   6  -4  422.23    5.34
  -4  -6   4  616.57    5.63
  -4  -6   4  356.24    7.26
  -4   6   4  472.75    6.25
   5   0  -1  488.09    5.65
   5   0  -1  520.34    6.53
  -5   0   1  350.99    2.91
  -5   0   1  460.21    2.91
  -5   0   1  488.18    7.50
   5   0  -1  362.46    4.78
   2   1   7   24.86    2.49
  -2  -1  -7   24.04    2.04
  -2  -1  -7   23.10    1.99
  -2   1  -7   20.31    1.89
   2   1   7   21.20    2.87
   2  -1   7   22.94    2.90
   2  -1   7   20.96    2.27
  -2  -1  -7   22.99    1.58
   2   1   7   22.69    2.14
  -1 -11   3   15.61    2.29
   1  11  -3   10.39    1.68
   1 -11  -3   19.31    1.33
   1  11  -3   14.99    1.52
   1  11  -3   15.45    1.73
  -1  11   3   15.94    1.66
   1 -11  -3   17.00    1.22
  -1 -11   3   20.56    2.51
  -1 -11   3   11.86    1.39
  -1  11   3   12.49    2.43
   1  11  -3   15.91    2.31
   1 -11  -3   17.44    1.72
  -1 -11   3   17.42    2.85
  -5  -1   2   21.00    2.73
  -5   1   2   20.25    1.33
   5  -1  -2   17.55    2.33
   5  -1  -2   14.51    1.88
  -5   1   2   21.34    2.74
   5   1  -2   20.00    1.65
  -5  -1   2   12.66    0.75
   5  -1  -2   20.74    1.78
   5   1  -1   62.63    2.27
  -5  -1   1   64.29    3.98
  -5   1   1   62.54    1.59
   5   1  -1   63.10    2.11
   5  -1  -1   61.18    2.99
   5  -1  -1   60.33    2.34
  -5   1   1   61.75    3.36
   5   1  -1   67.28    3.04
   2   9  -5  408.06    6.47
  -2  -9   5  699.23    7.99
   2  -9  -5  557.27    7.47
  -2  -9   5  440.83    4.29
  -2  -9   5  367.77    3.75
   2  -9  -5  558.31    6.18
  -2   9   5  543.31    7.40
  -2   9   5  583.97    7.10
  -2  -9   5  417.82    7.34
   2  -9  -5  648.06    6.20
  -4   7   0  155.73    3.67
   4  -7   0  148.20    3.06
  -4   7   0  162.30    4.80
   4  -7   0  160.22    3.82
   4   7   0  157.27    3.00
   4   4   3   49.07    1.69
  -4   4  -3   39.52    2.13
  -4  -4  -3   33.31    0.91
  -4   4  -3   37.12    2.00
   4  -4   3   44.75    2.00
   4  -4   3   46.26    2.30
  -4  -5   5  152.81    3.23
  -4  -5   5  168.25    3.22
  -4   5   5  124.52    3.39
   4   5  -5  121.32    3.26
   4  -5  -5  161.19    3.99
   4  -5  -5  142.62    3.71
  -4   5   5  201.39    4.69
  -4  -5   5  118.00    4.59
  -1 -10  -4   35.32    1.11
  -1  10  -4   43.33    2.93
   1 -10   4   43.67    2.71
  -1 -10  -4   47.54    2.54
  -1  10  -4   37.64    2.47
   1  10   4   47.15    2.40
   1 -10   4   43.80    3.89
   1  10   4   43.07    2.92
  -4  -3   6    8.95    1.52
  -4   3   6   10.79    2.46
  -4  -3   6    9.77    1.51
   4   3  -6    6.43    1.28
  -4  -3   6    8.05    1.27
  -4   3   6    6.64    1.55
   4  -3  -6    8.10    1.51
  -4  -3   6    5.09    2.59
  -4   3   6    9.93    1.25
   1   9   5   28.96    2.49
  -1   9  -5   26.57    3.08
   1  -9   5   26.39    3.64
  -1  -9  -5   30.26    2.22
  -1   9  -5   20.84    2.22
   1   9   5   29.00    1.98
  -1  -9  -5   26.93    1.05
   2  -2   7    1.34    2.08
  -2  -2  -7    1.75    1.55
  -2   2  -7    1.63    1.43
  -2  -2  -7    1.80    1.20
  -2  -2  -7    1.96    1.10
   2   2   7    1.58    1.48
   2   2   7    2.14    1.78
   2   2   7    1.27    2.94
   2  -2   7    0.65    2.72
   2 -11  -1  108.42    3.60
   2 -11  -1  128.40    2.84
   2  11  -1  116.36    3.23
   2  11  -1  129.22    3.59
  -2 -11   1  122.66    3.52
  -2 -11   1  110.64    2.69
  -2  11   1  121.32    4.03
   2  11  -1  131.99    3.47
   2 -11  -1  114.96    3.35
  -5   0   3    7.92    2.08
  -5   0   3    7.04    1.08
   0 -12   0    2.63    1.61
   0  12   0    2.50    2.04
   0 -12   0    3.30    2.20
   0  12   0    3.29    1.42
   0 -12   0    3.34    1.60
   0  12   0    3.81    1.46
   5  -2  -2   46.67    2.83
   5  -2  -2   50.71    2.25
   5   2  -2   51.16    2.11
  -5  -2   2   52.55    3.58
  -5   2   2   44.07    1.76
   2   8  -6   82.52    3.23
  -2   8   6  129.20    4.43
  -2  -8   6   87.71    2.34
  -2   8   6  134.32    3.73
   2  -8  -6  136.81    3.93
  -2  -8   6  144.70    4.02
  -2  -8   6   82.35    4.03
   2  -8  -6  135.73    3.38
  -2 -11   0    1.10    1.30
   2  11   0    0.92    1.39
  -2  11   0    0.42    2.18
   2 -11   0    1.17    1.53
   2  11   0    0.24    1.86
   2  11   0    0.75    1.36
  -2 -11   0    1.16    1.26
   2 -11   0    0.79    1.23
  -2 -11   0    0.51    1.71
   1  -7  -7  452.20    5.28
  -1  -7   7  352.59    7.45
   1  -7  -7  474.62    4.91
   1   7  -7  411.25    7.06
  -1  -7   7  390.36    4.79
  -1   7   7  441.98    6.30
  -1   7   7  409.93    3.85
  -1  -7   7  361.73    5.50
  -1   7   7  456.51    6.61
   4  -7  -3   40.70    2.23
  -4  -7   3   42.87    1.66
  -4   7   3   45.59    3.24
   4  -7  -3   35.18    2.16
   5  -2  -1  110.42    3.01
   5   2  -1  112.82    2.49
  -5   2   1  124.42    4.37
  -5   2   1   95.68    2.31
   5   2  -1  115.43    2.80
  -5   2   1  105.80    2.19
   0  -4  -8    0.80    1.36
   0   4   8    0.47    1.78
   0  -4  -8    0.71    1.94
   0   4  -8    0.36    1.66
   0  -4   8    0.94    1.92
   0   4   8    0.79    1.74
   0  -4  -8    0.78    1.27
   0  -4   8    1.20    1.98
   0   4   8    0.78    1.88
   0   4   8    0.48    1.09
   0  -4   8    0.65    2.60
   0  -4   8    0.53    1.74
  -1   0  -8    0.11    1.37
   1   0   8    0.25    1.65
   1   0   8   -0.20    2.56
   1   0   8   -0.54    1.87
  -5   1   3   24.54    2.59
  -5  -1   3   20.41    2.40
   5  -1  -3   14.62    1.78
  -5  -1   3   21.06    1.28
  -5   1   3   21.16    1.61
   5  -1  -3   18.71    1.71
  -5  -1   3   19.07    1.30
  -5   0   0    0.12    2.47
   5   0   0    0.13    1.53
   5   0   0    0.39    1.26
   2 -10  -4  159.73    3.47
  -2 -10   4  147.32    4.81
   2 -10  -4  159.28    2.38
  -2 -10   4  168.43    4.14
   2 -10  -4  185.87    3.91
   2 -10  -4  159.81    4.26
  -2 -10   4  149.97    3.16
  -2  10   4  152.63    3.55
   2  10  -4  126.26    3.71
  -4   0  -4   51.14    2.30
  -4   0  -4   36.49    1.87
   4   0   4   41.35    1.85
   4   0   4   45.43    2.15
  -1   1  -8   10.66    1.77
  -1  -1  -8   11.96    1.76
   1  -1   8   11.21    1.89
   1   1   8   10.87    2.62
  -1  -1  -8   12.06    1.56
   1   1   8   12.15    2.12
   1   1   8   11.27    1.69
   1  -1   8    9.24    2.91
   3   8   3  198.57    4.05
  -3   8  -3  214.29    5.84
   3  -8   3  177.71    3.93
  -3  -8  -3  244.16    3.85
   3  -8   3  187.34    4.42
   3   8   3  223.64    3.73
  -3   8  -3  135.12    3.60
   5   1   0    2.58    1.26
   5  -1   0    1.93    1.35
   5   1   0    1.74    1.01
   5   1   0    1.59    1.48
  -5   1   0    2.59    2.46
  -5  -1   0    2.98    3.37
  -5   1   0    1.67    0.71
   0 -12  -1    3.06    1.69
   0  12  -1    2.71    1.54
   0  12   1    3.67    1.35
   0 -12   1    3.17    1.83
   0  12   1    2.87    2.09
   0  12  -1    3.29    1.50
   0 -12   1    4.41    2.50
   0  12  -1    3.66    2.23
   0 -12  -1    4.81    1.80
   0 -12   1    4.39    1.73
   0 -12  -1    4.04    1.53
   4  -1   4   13.79    1.42
  -4  -1  -4   16.60    1.74
  -4   1  -4   12.44    1.42
  -4   1  -4   17.64    1.88
   4  -1   4   15.79    1.77
  -4  -1  -4   12.91    1.29
   4   1   4   15.68    1.67
   4   1   4   13.31    1.26
  -2  -9  -4   63.27    2.64
   2   9   4   61.10    2.42
   2   9   4   54.34    2.65
  -2   9  -4   46.95    2.70
  -2   9  -4   52.03    3.39
   2  -9   4   50.86    2.77
   2  -9   4   64.23    3.40
  -3   5  -5    0.61    1.40
   3   5   5    0.54    1.63
   3  -5   5   -0.11    1.72
  -3  -5  -5    1.31    1.06
  -3   5  -5    1.02    2.79
   3   5   5    0.27    0.94
   3  -5   5    0.30    1.43
   2   6   6  181.07    3.80
   2   6   6  170.06    4.06
   2  -6   6  145.63    4.05
  -2   6  -6  141.72    5.04
   2  -6   6  142.03    4.42
  -2  -6  -6  165.28    3.68
  -2   6  -6  140.02    4.35
   2   6   6  195.79    4.33
   4  -6   2  314.73    4.58
   4  -6   2  347.45    5.54
  -4   6  -2  291.18    5.14
  -4   6  -2  279.75    4.89
   4   6   2  329.99    4.54
   2 -11  -2   63.16    2.08
  -2 -11   2   58.52    3.15
   2  11  -2   47.85    2.34
  -2 -11   2   60.25    2.45
  -2  11   2   48.29    2.22
  -2  11   2   53.72    3.35
   2 -11  -2   52.60    2.42
   2 -11  -2   41.41    2.54
  -2 -11   2   59.76    2.41
   2  11  -2   49.20    2.63
   3   8  -5  527.02    7.12
  -3   8   5  534.46    6.60
  -3   8   5  600.77    7.85
  -3  -8   5  448.98    7.62
  -3  -8   5  679.17    7.16
   3  -8  -5  641.14    7.34
   3  -8  -5  688.70    7.66
   3  -8  -5  524.42    7.25
  -3  -8   5  508.75    6.07
   2  -4  -8    1.87    2.48
  -2  -4   8    2.07    2.57
  -2   4   8    1.14    2.10
   2  -4  -8    0.71    1.35
   2   4  -8    1.38    1.82
  -2  -4   8    1.24    1.26
  -2   4   8    1.24    1.06
  -2  -4   8    1.23    1.06
  -2   4   8    0.76    1.75
  -2   4   8    1.38    2.00
  -2  -4   8    1.23    1.59
  -2  -4   8    1.07    1.73
   0  -7   7  115.86    4.89
   0   7  -7  110.06    4.27
   0  -7  -7  122.10    3.72
   0   7   7  123.36    3.69
   0  -7   7  119.47    4.17
   0   7   7  105.21    1.93
   0   7   7  114.21    3.66
   0   7  -7  101.04    3.71
   0  -7   7  104.16    3.41
   0  -7  -7  131.20    3.08
   3   0   6   -0.39    1.25
   3   0   6   -0.84    1.83
  -3   0  -6   -0.42    1.23
  -3   0  -6    0.41    1.62
  -5   2   3  112.01    2.82
   5  -2  -3  115.79    3.20
   5  -2  -3  122.32    2.83
  -5  -2   3  110.61    2.33
  -3  -1  -6  111.76    3.10
   3  -1   6  105.30    3.02
  -3   1  -6  103.86    3.18
   3  -1   6   92.53    2.70
   3   1   6  106.77    2.95
   3   1   6  133.05    3.61
   3  -1   6  108.88    3.30
  -3  -1  -6  137.91    3.42
   2  -3   7  276.49    5.71
  -2   3  -7  285.46    5.67
   2  -3   7  339.66    6.01
   2   3   7  334.26    5.51
  -2  -3  -7  329.19    3.99
  -2  -3  -7  350.32    4.72
  -2  -3  -7  318.22    5.21
   2   3   7  363.41    5.94
   2   3   7  299.60    3.89
  -2   3  -7  372.92    8.70
   1  -2   8   83.42    3.14
  -1  -2  -8   98.86    3.20
   1   2   8   84.29    2.62
   1   2   8  100.34    3.39
   1   2   8   92.55    3.74
   1  -2   8   72.23    3.81
  -1  -2  -8   82.91    3.07
  -1   2  -8   78.71    3.27
  -1  -2  -8   94.42    2.68
   3  -7   4   15.27    1.91
  -3   7  -4   13.72    3.06
  -3  -7  -4   19.42    1.49
  -3   7  -4    9.88    1.75
   3   7   4   15.93    1.94
   3   7   4   20.37    2.01
   3  -7   4   14.42    1.66
  -1 -11  -3    0.39    1.36
   1 -11   3    0.04    1.88
  -1 -11  -3    0.82    1.03
   1  11   3    0.34    1.98
  -1  11  -3    0.43    1.46
   1  11   3    0.40    1.41
  -1  11  -3    0.25    2.35
  -1 -11  -3    0.94    1.70
   1 -11   3    1.85    3.37
   3   5  -7  149.88    4.41
  -3   5   7  163.31    2.85
  -3  -5   7  140.52    4.83
   3  -5  -7  172.25    4.15
  -3   5   7  141.43    3.97
  -3   5   7  164.70    4.20
  -3  -5   7  127.61    2.87
   2 -11   1  162.43    3.55
   2  11   1  173.66    3.95
   2  11   1  172.38    3.68
  -2  11  -1  159.91    4.60
   2  11   1  164.82    4.09
  -2 -11  -1  173.00    3.14
   4  -7   1  204.01    4.37
  -4   7  -1  162.13    3.91
   4   7   1  226.01    3.91
   4  -7   1  182.92    3.49
   3  -9   2  768.92    7.74
  -3   9  -2  774.13    9.35
   3  -9   2  754.67    8.18
   5   2   0  229.71    3.76
  -5   2   0  211.53    3.05
   5  -2   0  209.55    4.03
  -5   2   0  172.48    2.97
   5  -2   0  195.66    3.46
  -5   2   0  217.20    5.68
   5   2   0  243.55    4.70
  -2 -10  -3  249.74    4.08
   2 -10   3  189.77    4.34
  -2 -10  -3  220.05    4.44
   2  10   3  188.01    4.30
  -2  10  -3  189.15    4.98
   2  10   3  226.94    3.72
   5   3  -2  648.31    5.87
   5  -3  -2  623.30    6.79
   5  -3  -2  653.20    6.33
  -1   5   8  627.30    8.04
  -1   5   8  540.39    5.04
  -1   5   8  518.52    6.39
  -1   5   8  558.28    7.18
  -1  -5   8  495.53    8.58
  -1  -5   8  576.72    7.52
   1   5  -8  432.55    7.16
  -1  -5   8  527.66    5.80
   1  -5  -8  645.69    6.76
  -1  -5   8  491.79    6.70
  -1  -6  -7  134.23    3.69
   1   6   7  144.11    3.74
   1  -6   7  136.84    4.36
  -1   6  -7  134.27    4.89
  -1  -6  -7  135.00    1.95
   4   2   4  129.25    2.72
   4   2   4  145.50    3.12
   4  -2   4  131.16    3.17
   4  -2   4  139.78    3.52
  -4  -2  -4  145.29    2.92
  -4  -2  -4  117.70    2.34
  -4   2  -4  109.33    3.02
  -5   3   1    6.23    1.24
   5   3  -1    8.43    1.23
   5  -3  -1    6.92    1.57
  -5   3   1    7.45    1.16
  -5   3   1   10.45    2.86
  -1  10   5  107.38    3.24
   1 -10  -5  109.81    2.67
  -1 -10   5   81.62    2.98
  -1 -10   5   87.52    4.11
   1  10  -5  103.99    3.35
   1  10  -5   80.69    3.25
   1 -10  -5  111.88    2.56
  -1 -10   5  117.11    4.02
   1 -10  -5   77.04    1.57
   1 -12   0   44.14    2.36
  -1 -12   0   42.72    2.82
  -1  12   0   39.85    3.04
   1 -12   0   47.33    3.33
  -1 -12   0   51.81    2.72
  -1 -12   0   37.51    2.27
  -1  12   0   39.84    2.36
   1  12   0   34.46    2.09
   1  12   0   32.02    2.55
   1  -8   6  116.04    4.03
   1   8   6  118.85    3.65
  -1  -8  -6  125.61    3.61
   1   8   6  119.95    3.42
   3  -9  -4  280.65    3.58
   3  -9  -4  331.36    6.04
   3  -9  -4  250.53    5.05
  -3  -9   4  291.68    4.65
  -3  -9   4  215.16    3.81
   3  -9  -4  252.23    4.53
  -3   9   4  206.78    4.34
  -3   9   4  286.96    5.86
   3   9  -4  213.81    4.70
  -3  -9   4  189.53    5.20
   3   9  -4  266.60    4.24
   3   0  -8    0.50    1.33
  -3   0   8    0.36    1.62
  -3   0   8   -0.15    1.64
  -3   0   8    0.18    1.18
  -3   0   8   -0.19    2.12
  -2  -8  -5  133.75    3.48
   2   8   5  127.46    3.79
   2  -8   5  126.35    3.95
  -2   8  -5  123.24    4.60
   2   8   5  137.12    3.62
   0 -10   5   13.70    2.59
   0 -10  -5   15.29    1.52
   0 -10  -5   12.16    1.76
   0  10   5   11.80    2.60
   0 -10  -5   12.76    1.38
   0  10  -5   12.08    2.32
   0  10   5   12.31    2.16
   0 -10   5    7.87    2.20
   0  10  -5    7.30    1.89
   0 -10   5   11.35    3.05
   3  10  -1  240.62    4.09
  -3 -10   1  233.69    5.15
   3 -10  -1  220.03    4.91
   3  10  -1  258.24    4.36
   3 -10  -1  255.15    3.93
   3 -10  -1  218.62    4.50
  -3 -10   1  239.90    2.82
  -3  10   1  265.06    5.85
  -4  -4   6  169.98    3.71
  -4  -4   6  177.61    2.81
  -4   4   6  141.94    3.61
  -4  -4   6  139.21    5.02
  -4   4   6  201.44    3.23
   4  -4  -6  190.31    4.24
   4   4  -6  160.24    3.89
  -4  -4   6  203.10    3.71
  -4   4   6  222.57    4.55
   3  -7  -6  183.90    4.62
  -3  -7   6  116.39    2.09
   3   7  -6  107.70    3.54
  -3   7   6  141.13    2.63
  -3  -7   6  109.39    4.52
  -3  -7   6  166.38    3.82
  -3   7   6  145.48    4.33
   3  -7  -6  154.49    4.07
   1 -12  -1  624.25    6.75
   1  12  -1  538.64    7.02
   1 -12  -1  699.57    6.69
  -1 -12   1  628.39    6.84
   1  12  -1  554.55    6.71
  -1 -12   1  689.00    7.42
  -1  12   1  562.26    7.32
  -1 -12   1  461.32    4.95
  -1  12   1  547.73    6.01
  -3  -1   8   36.44    2.37
  -3   1   8   33.91    2.38
   3  -1  -8   33.95    2.32
  -3   1   8   32.24    2.27
   3   1  -8   30.30    2.21
  -3  -1   8   23.29    2.95
  -3   1   8   27.98    2.99
  -3  -1   8   34.80    1.77
  -3   1   8   40.37    2.08
  -3  -1   8   40.26    2.19
  -4  -5  -3   39.49    1.06
   4  -5   3   50.63    2.46
   4   5   3   53.77    1.74
  -4   5  -3   42.97    2.25
  -4   5  -3   43.62    2.33
   4  -5   3   53.77    2.36
  -1   9   6  153.64    4.39
  -1  -9   6   92.87    2.91
  -1  -9   6   86.42    4.21
  -1  -9   6  139.02    4.33
   1   9  -6   91.57    3.54
   1  -9  -6  120.06    2.74
   1  -9  -6  101.05    2.12
   1  -9  -6  132.75    3.02
  -5   0   4   -0.11    1.10
  -5   0   4    0.28    1.96
  -5   0   4   -0.33    0.95
  -3  -2  -6   84.52    2.67
   3   2   6   75.67    2.66
  -3   2  -6   50.97    2.45
   3  -2   6   62.11    2.49
   3  -2   6   48.25    2.25
  -3   2  -6   86.33    5.80
   3   2   6   69.63    3.13
  -3  -2  -6   67.35    2.35
   3  -2   6   65.70    2.87
   3   2   6   67.83    2.37
   0  12  -2  396.89    6.80
   0 -12  -2  379.28    3.62
   0 -12   2  262.45    4.11
   0  12   2  303.78    5.67
   0 -12   2  381.62    5.91
   0  12  -2  334.99    5.82
   0 -12  -2  374.50    4.78
   0 -12  -2  357.32    6.23
   0 -12  -2  348.18    3.34
   0 -12   2  461.14    7.20
   0  12   2  364.77    4.70
   3 -10   0   16.18    1.53
  -3  10   0   11.68    1.76
   3  10   0   15.68    1.52
  -3 -10   0    9.76    0.60
   3  10   0   15.36    1.92
   3 -10   0   14.98    1.88
  -3  10   0   18.23    2.84
  -5  -1   4  329.74    4.37
  -5   1   4  276.01    3.94
  -5   1   4  279.63    4.46
   5  -1  -4  198.03    4.01
  -5   1   4  342.41    5.65
  -5  -1   4  283.47    3.67
  -5  -1   4  203.65    4.30
   3 -10  -2  122.74    3.42
   3  10  -2  105.35    3.16
  -3 -10   2  107.04    3.86
   3 -10  -2  109.29    3.64
  -3 -10   2  121.76    2.58
   3 -10  -2  127.53    2.67
  -2   7   7   39.53    1.50
  -2  -7   7   45.65    2.75
   2  -7  -7   42.66    2.53
  -2   7   7   51.91    3.07
   2   7  -7   31.60    2.49
  -2   7   7   41.49    2.99
  -2  -7   7   35.77    2.19
   2  -7  -7   46.85    2.60
   5  -3  -3    9.48    2.33
  -5   3   3   10.58    1.41
  -5   3   3   11.73    2.47
   5  -3  -3   11.73    1.40
  -5  -3   3   11.05    1.13
   5  -3  -3   11.92    1.64
   1  12   1   34.24    2.66
  -1 -12  -1   37.47    2.06
  -1  12  -1   33.64    2.48
  -1  12  -1   45.86    3.49
   1 -12   1   46.80    3.63
  -1 -12  -1   40.56    2.21
   1  12   1   41.01    1.88
   1 -12   1   46.57    2.49
  -1 -12  -1   46.22    1.90
   1  12   1   41.35    2.19
   0 -11   4    1.61    1.43
   0  11   4    0.85    1.42
   0  11  -4    1.06    1.66
   0 -11  -4    1.26    0.99
   0 -11   4    1.14    2.20
   0  11  -4    0.95    2.06
   0 -11  -4    1.67    1.20
   0 -11  -4    1.08    1.42
   0  11   4    0.78    2.27
   0 -11   4    2.07    2.73
   5   0   1  113.38    3.04
   5   0   1  100.18    2.65
   0   9  -6   -0.17    2.47
   0   9  -6    0.14    1.58
   0  -9   6    0.41    2.97
   0  -9  -6    0.31    1.05
   0  -9   6    0.54    2.32
   0  -9  -6    0.59    1.35
   0  -9  -6    0.36    1.42
   0   9   6    0.59    1.52
  -4   6   5   88.63    3.81
  -4  -6   5   66.58    2.29
  -4  -6   5   75.77    2.52
   4  -6  -5   67.75    2.89
   4   6  -5   48.72    2.28
  -4  -6   5   42.40    3.40
  -4   6   5   49.34    2.53
   4   7  -4   77.38    2.78
  -4  -7   4   72.17    2.24
  -4  -7   4   69.24    2.14
   4  -7  -4   70.67    2.83
  -4   7   4   77.55    3.56
   0  -5   8   24.94    2.63
   0   5   8   24.83    1.41
   0   5   8   33.96    2.73
   0  -5  -8   26.27    2.06
   0  -5   8   22.37    2.44
   0  -5   8   28.77    2.67
   0  -5  -8   27.20    1.60
   0   5   8   32.55    2.63
   0   5  -8   24.43    2.54
   0  -5  -8   29.48    2.36
   0  -5   8   24.44    3.25
   1   3   8   82.01    3.54
   1  -3   8   66.74    2.94
   1   3   8   96.36    3.53
   1   3   8   76.51    2.40
   1   3   8   71.34    2.91
  -1  -3  -8   87.29    2.97
   1  -3   8   75.66    3.24
  -1  -3  -8   75.37    3.01
  -1   3  -8   66.46    3.16
   1  -3   8   62.11    3.83
  -1  -3  -8   80.19    2.35
   4   8  -1    6.34    1.34
  -4  -8   1    8.40    0.87
  -4   8   1    7.38    2.82
   4  -8  -1    8.16    1.24
   4  -8  -1    7.45    1.59
  -1 -11   4  301.59    5.77
   1 -11  -4  277.69    2.79
  -1 -11   4  229.03    4.52
   1  11  -4  236.41    5.05
   1 -11  -4  287.43    3.55
  -1 -11   4  285.37    6.27
  -1  11   4  265.81    4.53
  -1  11   4  234.66    5.58
   1  11  -4  271.23    4.92
   1 -11  -4  339.82    5.09
   1 -11  -4  189.31    2.17
  -1 -11   4  203.62    3.17
  -5   3   0  194.45    3.16
  -5   3   0  239.85    5.98
   5  -3   0  215.31    4.24
   5  -3   0  211.99    3.76
  -5   3   0  176.69    3.31
   5   3   0  222.02    3.61
   3   2  -8    4.18    1.55
  -3  -2   8    5.28    2.46
   3  -2  -8    4.11    1.52
  -3   2   8    4.85    1.22
  -3  -2   8    3.78    1.72
  -3  -2   8    3.14    0.95
  -3   2   8    3.33    1.92
  -3   2   8    4.12    2.02
  -3  -2   8    4.97    1.53
  -3   2   8    3.81    2.35
  -5  -1  -1  198.05    7.02
   5  -1   1  158.33    3.61
  -5   1  -1  110.01    2.10
   5  -1   1  143.99    3.10
  -5   1  -1  181.44    5.84
   5   1   1  157.68    3.29
   4  -3   4   55.63    2.57
  -4  -3  -4   45.88    1.51
   4  -3   4   52.12    2.20
   4   3   4   54.92    1.83
  -4   8   2  277.44    6.19
  -4  -8   2  283.00    3.20
   4  -8  -2  259.88    3.87
   4  -8  -2  255.34    4.75
   2 -11  -3  167.25    2.75
   2 -11  -3  148.76    4.13
   2 -11  -3  148.32    3.50
  -2 -11   3  131.41    3.18
  -2 -11   3  149.73    4.81
  -2  11   3  145.86    4.46
  -2 -11   3  163.05    3.81
  -2  11   3  136.97    3.43
   2  11  -3  174.58    3.79
   2  11  -3  130.57    3.82
  -1 -12   2   80.50    2.52
   1 -12  -2  114.66    3.11
   1  12  -2   99.57    3.48
  -1  12   2   99.69    2.92
  -1  12   2   86.17    3.79
  -1 -12   2  106.22    3.98
   1 -12  -2   96.36    2.15
  -1 -12   2  122.41    4.02
   1  12  -2   82.58    3.10
   1 -12  -2  104.79    3.09
  -4   0   7    0.01    1.51
   4   0  -7   -0.01    1.22
  -4   0   7   -0.17    2.40
  -4   0   7   -0.34    1.43
  -5   2   4  358.81    5.23
   5  -2  -4  362.08    5.03
  -5   2   4  373.34    6.40
  -2  -4  -7    0.67    1.42
   2   4   7    0.67    1.67
   2   4   7    0.98    2.60
  -2   4  -7   -0.33    1.59
   2  -4   7    1.14    2.80
  -2  -4  -7    0.60    1.02
   2  -4   7    1.17    2.10
  -2  -4  -7    0.65    1.25
  -2   4  -7    0.84    3.51
   5  -4  -2    2.47    1.37
  -5   4   2    2.38    2.57
   5  -4  -2    2.63    1.33
  -5   4   2    2.51    1.44
   2  -5  -8  290.61    5.54
  -2  -5   8  208.01    2.70
  -2   5   8  267.80    3.70
  -2  -5   8  239.42    4.48
  -2   5   8  275.68    5.43
  -2   5   8  275.55    5.30
   2   5  -8  257.18    5.71
   2  -5  -8  313.97    5.63
  -2  -5   8  207.49    5.96
   4   1  -7    2.26    1.33
  -4  -1   7    1.82    1.44
  -4   1   7    1.86    1.53
  -4  -1   7    1.36    2.55
  -4   1   7    1.63    2.63
   4  -1  -7    2.81    1.32
  -4   1   7    2.01    1.70
  -4  -1   7    0.67    0.76
  -4   1   7    2.60    1.19
  -5   4   1  455.40    7.99
  -5   4   1  367.81    4.73
   5   4  -1  457.28    5.10
   5  -4  -1  393.38    5.59
  -5   4   1  346.80    5.00
   3  -3   6  119.54    3.31
   3   3   6  137.96    3.03
  -3   3  -6  166.88    6.37
   3   3   6  136.13    3.93
   3  -3   6  131.99    3.73
  -3  -3  -6  137.19    3.23
  -3  -3  -6  164.22    3.15
  -3   3  -6  110.69    3.52
   4  -8   0   36.63    2.24
  -4   8   0   29.42    2.10
   4  -8   0   34.60    1.79
  -1   0   9  303.57    5.57
  -1   0   9  374.78    5.24
  -1   0   9  452.50    7.19
  -1   0   9  381.86    5.09
  -1   0   9  296.05    5.96
   1   0  -9  407.07    6.97
   5  -2   1   74.99    2.69
   5  -2   1   70.23    2.27
  -5   2  -1   62.40    1.99
   5   2   1   78.16    2.38
  -5   2  -1   81.59    4.29
  -5   2  -1   63.89    2.07
   2 -11   2   31.26    2.19
   2  11   2   24.76    2.40
  -2 -11  -2   33.73    2.15
  -2  11  -2   26.82    3.09
   2 -11   2   28.07    2.33
  -3   6  -5  605.46    7.96
   3   6   5  748.27    7.56
   3   6   5  869.20    7.85
  -3  -6  -5  883.03    7.42
   3  -6   5  708.35    7.77
   3  -6   5  780.30    8.51
  -3   6  -5  721.02   10.19
   3  10   1    1.16    1.74
   3 -10   1    0.64    1.34
  -3  10  -1    0.07    2.44
  -3  10  -1    0.73    1.45
  -1   1   9    3.90    1.54
  -1  -1   9    4.05    2.39
  -1  -1   9    4.76    2.24
   1   1  -9    3.60    1.71
  -1  -1   9    1.95    2.55
   1  -1  -9    4.19    1.62
  -1  -1   9    4.29    1.73
  -1  -1   9    4.72    1.67
  -1   1   9    3.90    1.98
  -1   1   9    3.45    1.77
  -1   1   9    3.05    2.45
  -3 -10   3   60.27    2.36
   3 -10  -3   55.06    1.78
   3 -10  -3   50.82    2.45
   3  10  -3   36.81    2.12
  -3  10   3   45.69    2.46
  -3 -10   3   47.19    3.25
   3 -10  -3   51.58    2.67
  -3   3   8  357.72    5.48
  -3  -3   8  285.61    4.67
  -3   3   8  330.38    6.56
  -3   3   8  341.45    4.43
  -3  -3   8  287.37    6.41
  -3   3   8  323.81    6.00
   3   3  -8  278.87    5.44
   3  -3  -8  348.17    5.94
   1  -8  -7   54.74    2.48
  -1  -8   7   38.96    2.34
  -1   8   7   60.75    3.36
  -1   8   7   59.00    2.93
   1  -8  -7   55.52    2.29
  -1   8   7   52.76    1.56
   1   8  -7   35.80    2.63
  -1  -8   7   54.77    3.24
  -1  -8   7   41.29    2.45
  -4  -5   6   83.09    1.91
   4  -5  -6   86.98    3.09
  -4   5   6   85.81    2.24
  -4   5   6   99.81    3.64
  -4  -5   6   93.54    2.84
   4   5  -6   61.51    2.68
  -4   5   6   64.04    2.76
  -4  -5   6   78.70    2.73
  -4   2   7  110.23    2.69
  -4  -2   7   92.99    2.73
  -4   2   7   67.45    3.79
   4  -2  -7   97.01    3.11
   4   2  -7   87.73    3.02
  -4   2   7   90.97    3.16
  -4   2   7  122.73    3.30
  -4  -2   7   82.31    4.22
  -4  -2   7  115.91    3.18
  -4  -8   3    6.00    2.58
  -4  -8   3    7.50    1.22
  -4   8   3    5.33    2.72
   4  -8  -3    7.24    1.19
   4  -8  -3    5.98    1.51
  -3   6   7  131.41    4.08
  -3  -6   7  134.82    3.61
   3   6  -7   96.12    3.67
  -3   6   7  118.33    2.49
   3  -6  -7  129.62    3.82
   3  -6  -7  125.62    3.90
  -3  -6   7   85.96    2.51
  -5   4   3   92.02    2.89
  -5   4   3  102.76    3.92
  -5  -4   3   91.85    2.14
   5  -4  -3   97.30    3.05
   5  -4  -3   99.51    2.92
  -2   7  -6   27.04    2.50
   2  -7   6   34.44    2.69
   2   7   6   40.10    2.49
  -2  -7  -6   41.96    1.09
  -2  -7  -6   41.04    2.18
   2   7   6   40.22    2.21
   2  -7   6   34.58    3.34
  -2   7  -6   28.07    3.15
   4   7   2   38.96    2.27
   4  -7   2   35.66    2.36
   1  -6  -8    2.05    2.59
  -1  -6   8    1.85    1.90
  -1  -6   8    1.75    1.82
   1   6  -8    1.99    1.75
  -1   6   8    1.58    1.78
  -1   6   8    1.42    2.15
  -1  -6   8    1.08    2.88
  -1   6   8    1.57    1.01
  -1  -6   8    0.97    2.20
   1  12   2   21.37    2.53
  -1  12  -2   27.72    2.82
   1  12   2   25.53    1.70
   1 -12   2   29.49    3.49
  -1  12  -2   17.67    2.19
   1 -12   2   31.11    2.57
  -1 -12  -2   27.64    2.24
  -1 -12  -2   22.98    1.75
  -1 -12  -2   36.48    2.55
  -1 -12  -2   20.44    1.00
  -5   3   4   17.46    2.64
   5  -3  -4   24.08    1.81
  -5  -3   4   21.07    1.41
  -5   3   4   21.27    1.83
  -5  -3   4   26.83    1.49
   5  -3  -4   22.45    1.93
   1  -4   8   75.82    3.36
   1  -4   8   60.50    2.93
  -1  -4  -8   79.71    2.15
   1   4   8   87.50    3.42
  -1  -4  -8   80.15    3.10
   1   4   8   95.54    3.68
  -1  -4  -8   88.54    2.89
   1  -4   8   67.29    4.06
   1   4   8   78.95    2.38
  -1   4  -8   65.06    3.23
  -2 -10   5  112.68    4.47
  -2 -10   5  117.42    2.68
   2 -10  -5  167.83    4.55
  -2 -10   5  161.25    4.20
   2  10  -5  112.07    3.74
   2 -10  -5  182.78    3.61
   2 -10  -5  151.27    3.41
  -2  10   5  146.18    4.49
   2 -10  -5  145.18    2.17
  -2  10   5  134.69    3.62
  -2 -10   5   84.46    1.97
   5  -4   0   60.91    2.22
  -5   4   0   55.20    2.15
   5  -4   0   57.68    2.49
  -5   4   0   63.14    3.98
  -5   4   0   56.59    2.32
  -1   2   9  603.70    6.13
  -1  -2   9  602.24    7.77
  -1  -2   9  627.14    7.09
  -1   2   9  520.18    7.93
  -1   2   9  726.26    8.82
  -1  -2   9  689.70    7.81
  -1   2   9  731.57    7.97
   1   2  -9  692.35    9.48
   1  -2  -9  666.17    8.57
  -1  -2   9  448.08    8.18
   2  -9  -6    4.20    1.85
   2  -9  -6    3.83    1.65
  -2  -9   6    3.80    2.13
  -2  -9   6    3.04    1.41
   2   9  -6    1.85    1.64
  -2   9   6    3.55    1.77
  -2  -9   6    2.98    2.73
   2  -9  -6    4.20    1.33
  -2   9   6    4.50    2.43
  -4   4  -4    1.97    1.44
  -4   4  -4    1.91    1.35
  -4  -4  -4    2.77    0.86
   4   4   4    1.53    1.44
   4  -4   4    2.64    1.34
  -4   4  -4    2.87    2.94
   4   4   4    3.07    0.92
   4  -4   4    2.07    1.60
   0 -12   3   11.16    2.35
   0 -12   3    5.91    1.48
   0 -12  -3   11.13    1.55
   0  12   3    8.39    1.49
   0 -12   3   11.07    2.95
   0 -12  -3    9.66    1.74
   0  12  -3    8.89    1.82
   0  12   3    6.77    2.47
   0 -12  -3   10.03    1.11
   0  12  -3   12.00    2.43
  -4   6  -3   17.47    3.32
   4  -6   3   15.36    1.85
  -4  -6  -3   14.19    0.84
  -4   6  -3   12.38    1.68
   4   6   3   14.32    1.25
   4   6   3   15.83    1.79
   4  -6   3   14.52    1.61
   1  -7   7   91.68    5.01
  -1  -7  -7  122.63    2.82
   1  -7   7   98.50    4.02
  -1  -7  -7  100.16    3.34
  -1   7  -7   70.25    3.79
   1   7   7  111.62    3.71
   5  -3   1   62.40    2.53
  -5   3  -1   53.87    2.12
   5  -3   1   63.67    2.27
  -5   3  -1   51.63    1.98
  -5   3  -1   66.22    4.13
  -1 -10  -5    9.64    0.88
   1  10   5   12.28    1.77
   1  10   5   12.34    2.31
  -1  10  -5    7.48    2.09
   1 -10   5   10.88    3.78
  -1 -10  -5   13.36    1.76
  -1  10  -5   12.25    2.83
   0  -8  -7  341.34    4.39
   0   8  -7  246.68    5.75
   0  -8   7  309.57    6.12
   0   8  -7  243.14    5.68
   0  -8  -7  319.02    5.83
   0   8   7  307.05    5.18
   0  -8   7  241.12    4.58
   0   0   9    0.73    2.40
   0   0   9    2.09    1.64
   0   0   9    0.94    1.98
   0   0  -9    1.40    1.63
  -3   9  -3    0.51    1.43
   3   9   3    0.43    1.88
   3  -9   3   -0.14    1.69
  -3   9  -3    0.56    2.66
   3  -9   3    0.09    1.33
  -3  -9  -3    0.56    1.10
  -2   0   9    0.63    2.66
  -2   0   9    0.46    1.44
   2   0  -9    0.36    1.46
  -2   0   9    0.71    2.47
  -2   0   9    0.01    2.10
  -2   0   9    0.57    1.68
  -5   0   5   88.37    2.35
  -5   0   5   85.55    2.76
   3  -4   6   24.80    2.00
  -3   4  -6   24.04    2.18
  -3  -4  -6   35.59    1.74
   3   4   6   30.45    1.67
  -3  -4  -6   32.97    2.00
   3   4   6   33.72    2.57
   3  -4   6   27.15    2.43
  -3   4  -6   31.19    3.97
   3   8   4  147.14    3.82
   3  -8   4  140.98    3.97
  -3   8  -4  136.83    5.17
   0  -1  -9  799.25    9.52
   0  -1   9  851.04    8.44
   0  -1   9  852.52    9.18
   0   1   9  672.37    8.70
   0   1   9  870.80    8.00
   0   1   9  820.44    7.57
   0  -1   9  657.42    9.05
   4   8   1   53.94    2.40
   4  -8   1   46.00    2.07
   4  -8   1   49.88    2.57
  -2   1   9   93.72    3.91
  -2  -1   9   95.83    4.46
  -2  -1   9  134.04    3.60
  -2  -1   9  112.63    2.89
  -2   1   9   96.26    3.69
  -2   1   9  126.06    3.18
   2  -1  -9  129.64    3.99
  -2  -1   9  117.07    4.29
   2   1  -9  126.06    4.09
  -2  -1   9  122.32    3.46
  -2   1   9  125.55    4.86
  -2   1   9  118.66    3.34
  -1  12   3   34.80    3.00
   1  12  -3   29.85    2.12
   1 -12  -3   40.27    1.61
   1 -12  -3   39.78    2.22
   1  12  -3   37.86    2.62
   1 -12  -3   40.03    2.12
  -1 -12   3   45.10    3.33
  -1 -12   3   36.32    2.71
  -1  12   3   36.45    2.12
  -1 -12   3   30.21    1.82
  -1 -12   3   44.32    3.03
   1 -11   4  410.47    6.70
   1  11   4  401.51    6.55
   1 -11   4  389.20    7.22
  -1  11  -4  383.67    6.69
  -1  11  -4  376.14    6.50
  -1 -11  -4  394.87    6.40
  -5  -1   5    1.15    1.52
   5  -1  -5    2.13    1.21
  -5  -1   5    2.73    1.10
  -5   1   5    3.12    2.18
  -5   1   5    2.32    1.37
  -5   1   5    2.35    1.43
  -5  -1   5    2.96    1.37
  -5   1   5    2.97    1.05
   3  -9  -5  205.45    4.91
   3  -9  -5  198.70    4.05
  -3   9   5  206.25    5.17
  -3  -9   5  246.66    4.60
   3  -9  -5  241.78    4.90
   3   9  -5  136.48    3.89
  -3  -9   5  149.37    4.99
  -3   9   5  199.48    4.35
  -4   3   7  256.03    3.77
  -4  -3   7  265.67    4.39
  -4   3   7  209.90    4.64
   4  -3  -7  215.16    4.59
  -4  -3   7  204.00    5.73
  -4   3   7  302.08    4.87
   4   3  -7  191.14    4.18
  -4  -3   7  227.16    3.72
   2  -5   7  227.49    5.69
   2   5   7  263.49    4.92
  -2   5  -7  199.93    5.10
   2  -5   7  250.93    5.31
  -2  -5  -7  258.93    4.71
  -2   5  -7  227.05    6.99
   0  -6   8   10.91    2.52
   0  -6   8    7.51    1.88
   0  -6  -8   10.07    1.66
   0   6  -8    8.45    3.62
   0   6  -8    5.58    1.89
   0   6   8   12.04    2.32
   0  -6  -8   12.07    2.09
   0   6   8    9.97    2.23
   0  -6   8    7.46    2.29
   0  -6   8    8.37    3.14
   0   6   8    9.51    1.14
   0  -6  -8   12.23    1.32
  -5   5   2  219.23    5.43
   5  -5  -2  228.43    4.48
  -5  -5   2  248.82    3.13
   5  -5  -2  242.09    4.47
  -5   5   2  216.03    4.27
   3   8  -6   51.09    2.78
  -3  -8   6   57.68    1.36
   3  -8  -6   67.64    2.63
  -3  -8   6   78.96    3.13
   3  -8  -6   81.99    3.31
  -3  -8   6   55.41    3.79
  -3   8   6   69.41    3.75
   3  -8  -6   88.64    3.50
  -3   8   6   61.11    2.94
  -5   5   1    0.91    1.42
   5  -5  -1    0.47    1.43
  -5   5   1    0.18    1.15
  -5   5   1    0.61    2.89
  -2  10  -4    5.35    2.43
   2  10   4   10.04    1.67
  -2 -10  -4    9.55    1.55
  -2  10  -4    7.38    1.82
   2 -10   4    7.76    2.31
   2  10   4    8.88    2.06
   5   0   2    0.08    0.96
   5   0   2    0.17    1.38
  -5   0  -2    0.31    3.74
  -5   0  -2    0.30    0.48
  -1  -3   9   10.40    2.43
   1   3  -9   11.62    1.96
  -1  -3   9    8.49    2.96
  -1  -3   9   11.31    2.14
  -1   3   9   10.82    2.59
  -1  -3   9   11.65    2.28
  -1   3   9   10.05    1.36
  -1   3   9   12.77    2.17
  -3   4   8  144.40    4.58
  -3  -4   8  120.86    3.26
  -3   4   8  155.41    3.06
   3   4  -8  121.67    4.06
  -3   4   8  166.70    4.21
  -3   4   8  163.81    4.87
  -3  -4   8  127.45    4.75
   3  -4  -8  152.31    4.09
   2 -11  -4   59.94    2.80
  -2  11   4   49.94    2.46
   2 -11  -4   55.09    1.65
   2 -11  -4   52.14    2.77
   2  11  -4   38.41    2.67
  -2 -11   4   46.97    2.44
   2 -11  -4   49.53    2.29
  -2 -11   4   44.63    3.53
  -2 -11   4   51.05    2.79
  -4   7   5   65.90    3.48
  -4  -7   5   56.76    2.35
  -4   7   5   48.24    2.57
  -4  -7   5   38.20    3.32
   4  -7  -5   59.09    2.81
  -4  -7   5   68.84    2.50
   2  12  -1    0.45    1.35
  -2 -12   1    0.18    1.56
   2 -12  -1    0.13    1.56
  -2  12   1    2.71    2.64
   2 -12  -1    0.18    1.25
   2  12  -1   -0.01    1.92
  -2 -12   1    0.08    2.02
   5  -1   2    2.91    1.10
   5   1   2    3.63    1.42
   5  -1   2    3.85    1.47
  -5   1  -2    1.70    0.91
   5   1   2    3.18    1.03
  -5   1  -2    3.94    3.16
   0   2   9   45.41    2.66
   0  -2   9   42.06    2.83
   0  -2   9   31.80    3.38
   0  -2   9   42.13    2.61
   0   2   9   30.87    3.05
   0   2   9   39.86    2.09
   0  -2  -9   39.55    2.50
   1  -9   6   62.85    3.51
   1   9   6   60.94    2.99
   1   9   6   61.76    2.68
  -1  -9  -6   62.56    2.75
  -1  -9  -6   60.82    1.52
  -2  -2   9   91.79    3.21
  -2  -2   9   75.51    3.22
   2  -2  -9   83.91    3.35
   2   2  -9   75.82    3.29
  -2  -2   9   86.30    2.71
  -2   2   9   88.47    3.24
  -2   2   9   64.50    3.35
  -2  -2   9   78.75    4.28
  -2   2   9   86.30    2.69
  -2  -2   9   88.83    3.06
  -2   2   9   56.31    3.38
  -5  -2   5   26.98    1.56
  -5   2   5   26.85    1.61
  -5   2   5   23.38    1.91
  -5   2   5   25.23    2.01
  -5  -2   5   32.48    1.96
  -5   2   5   28.47    2.53
   5  -2  -5   27.25    1.85
   2 -12   0  423.84    5.36
   2  12   0  383.22    5.90
  -2 -12   0  300.44    3.75
   2  12   0  394.95    5.84
  -2 -12   0  401.52    5.30
  -2  12   0  310.64    5.78
  -2  12   0  355.60    6.44
   2 -12   0  388.74    6.00
   2   9   5  573.03    7.49
  -2  -9  -5  580.26    7.09
   2   9   5  555.71    6.41
  -2   6   8    0.85    0.98
   2   6  -8    0.81    1.67
   2  -6  -8    1.18    1.50
  -2  -6   8    0.02    2.74
  -2   6   8    0.29    2.27
  -2  -6   8    0.53    1.91
   2  -6  -8    0.98    2.35
   5  -4  -4   23.62    2.02
  -5  -4   4   21.76    1.37
   5  -4  -4   24.73    1.91
  -5   4   4   19.88    1.83
  -5   4   4   19.73    2.73
   2  -8  -7  100.91    3.12
  -2   8   7   99.94    3.67
  -2   8   7   85.64    2.11
   2  -8  -7   93.49    3.50
  -2   8   7   90.31    3.87
   2   8  -7   68.26    3.32
  -2  -8   7   61.67    2.36
  -2  -8   7   94.02    3.53
   3 -10   2   49.47    2.39
   3  10   2   54.36    2.56
  -3  10  -2   51.44    3.48
  -4  -8   4  160.41    5.39
  -4  -8   4  165.65    3.20
  -4  -8   4  250.02    3.88
  -4   8   4  233.94    5.55
   4  -8  -4  221.47    4.75
   4   0   5    0.13    1.66
   4   0   5   -0.28    1.16
  -4   0  -5   -0.20    1.23
  -4   0  -5    0.39    1.65
   5  -5  -3  130.31    3.58
  -5  -5   3  143.21    2.62
   5  -5  -3  133.90    3.46
  -5   5   3  142.51    4.62
  -3 -10   4   10.61    2.69
  -3  10   4   10.72    2.76
   3 -10  -4   15.25    2.77
   3 -10  -4   13.31    1.18
   3  10  -4    5.79    1.67
   3 -10  -4   12.01    1.78
  -3  10   4   10.08    1.88
   3 -10  -4   12.54    1.74
  -3 -10   4   13.45    1.81
   0  13   0   -0.58    1.51
   0 -13   0   -0.15    1.62
   0  13   0   -0.39    2.21
   0 -13   0    0.10    2.32
   0 -13   0   -0.56    1.73
  -5   4  -1   13.73    1.71
   5  -4   1   15.94    1.82
  -5   4  -1   11.04    1.31
  -5   4  -1   17.89    3.28
   5  -4   1   15.44    1.45
  -4  -1  -5   16.52    1.84
   4  -1   5   14.48    1.64
   4   1   5   13.11    1.45
   4  -1   5   13.58    1.86
  -4  -1  -5   11.67    1.43
  -1  -5  -8  418.84    4.10
  -1   5  -8  414.24    9.08
   1  -5   8  410.08    6.68
  -1   5  -8  387.41    7.17
   1  -5   8  346.18    7.16
  -1  -5  -8  431.30    6.62
   1   5   8  422.11    6.25
   1   5   8  435.97    6.32
  -1  -5  -8  470.08    5.56
   5   2   2  333.62    4.35
   5  -2   2  330.93    4.60
   5  -2   2  340.75    5.19
  -5   5   0  130.83    5.14
   5  -5   0  127.55    3.56
   2  11   3  204.05    4.03
   2  11   3  160.50    4.36
   2 -11   3  156.19    4.29
   2 -11   3  157.61    4.34
  -2 -11  -3  210.47    3.92
  -2 -11  -3  162.22    4.02
  -2  11  -3  137.33    4.58
  -2 -12   2  170.18    3.71
  -2  12   2  174.76    3.82
   2 -12  -2  220.21    5.34
  -2 -12   2  218.95    5.07
  -2 -12   2  222.05    4.14
   2 -12  -2  201.99    3.44
   2 -12  -2  205.24    4.38
   2  12  -2  197.96    4.13
  -2  12   2  223.73    5.55
   2  12  -2  159.96    4.07
   4   5   4   28.70    1.48
   4  -5   4   27.14    2.21
  -4   5  -4   18.67    1.88
  -4  -5  -4   29.48    1.36
   4   5   4   32.95    2.21
   4  -5   4   26.17    1.99
  -4   5  -4   23.58    3.55
   4  -6  -6  406.80    6.48
  -4  -6   6  286.26    6.97
  -4  -6   6  313.73    4.63
  -4   6   6  439.55    6.79
  -4  -6   6  464.45    6.02
   4   6  -6  301.65    5.28
  -4  -6   6  376.81    3.02
  -4   6   6  331.46    5.58
  -4   6   6  407.35    4.54
   1 -10  -6    5.09    1.52
  -1  10   6    4.72    1.82
  -1 -10   6    6.88    2.42
  -1 -10   6    3.69    2.11
   1 -10  -6    6.02    1.81
   1 -10  -6    7.23    1.37
  -1 -10   6    5.21    3.01
   1  10  -6    3.31    1.84
   3  -7   5  252.20    5.25
   3  -7   5  232.55    4.82
  -3   7  -5  223.11    6.21
   3   7   5  329.36    5.43
  -3  -7  -5  286.78    4.46
   3   7   5  270.66    5.01
  -3   7  -5  179.81    4.36
  -4   9   1  119.02    4.78
   4  -9  -1  120.25    3.66
   4  -9  -1  118.66    2.85
  -1 -11   5   86.68    4.47
   1  11  -5   73.87    3.48
  -1 -11   5  113.95    4.10
  -1 -11   5   78.96    3.18
  -1  11   5   92.64    4.27
  -1  11   5   95.21    3.24
   1 -11  -5  109.38    2.84
   1 -11  -5  106.12    2.49
   1 -11  -5  107.35    3.95
  -1 -11   5   77.81    2.31
   0  13   1    0.20    2.25
   0  13   1    0.93    1.47
   0 -13  -1    0.95    1.57
   0 -13   1   -0.26    1.82
   0  13   1    1.13    1.29
   0 -13   1    0.35    2.45
   0  13  -1    0.97    1.53
   0 -13   1    0.78    1.83
   0  13  -1    1.31    2.30
   0 -13  -1    0.43    1.71
   0 -11   5  312.51    6.50
   0 -11   5  198.38    3.63
   0  11  -5  229.03    5.62
   0  11  -5  235.56    5.17
   0 -11   5  269.26    6.68
   0 -11  -5  289.43    6.09
   0  11   5  247.97    4.90
   0 -11  -5  288.07    3.58
   0 -11  -5  301.08    3.87
   0  11   5  274.60    5.90
  -3 -11   1   26.44    1.44
  -3 -11   1   24.79    2.75
  -3  11   1   22.24    1.94
  -3  11   1   29.63    3.20
   3 -11  -1   25.19    2.21
   3  11  -1   28.03    2.29
   3 -11  -1   27.10    1.74
  -4  -4   7   10.11    3.09
  -4   4   7   13.49    2.51
   4   4  -7    8.21    1.74
   4  -4  -7   10.55    1.76
  -4  -4   7   10.61    1.49
  -4   4   7   13.44    1.35
  -4  -4   7   12.51    1.66
  -4   4   7   10.21    1.92
   4  -9  -2   64.07    2.09
   4  -9  -2   61.26    2.92
  -4   9   2   66.81    3.96
   1  12   3   85.61    3.56
   1  12   3   84.54    2.86
  -1  12  -3   52.86    2.92
  -1 -12  -3   65.28    1.98
  -1 -12  -3   87.69    3.29
   1 -12   3   96.18    3.79
   1 -12   3   93.92    4.50
  -1  12  -3   77.14    3.71
   0   3   9  374.69    5.85
   0  -3   9  330.33    6.14
   0  -3  -9  354.25    4.81
   0  -3   9  293.13    6.83
   0   3   9  323.74    5.89
   0   3   9  419.08    6.54
   0   3   9  356.37    4.75
   0  -3   9  371.56    5.99
   0  -3  -9  368.24    6.44
  -2  12  -1   16.95    2.90
   2  12   1   20.14    1.90
   2 -12   1   16.55    1.90
   2  12   1   13.19    2.29
   2 -12   1   17.54    2.11
  -2   3   9  355.73    6.47
  -2  -3   9  368.21    6.02
   2   3  -9  363.77    7.10
  -2  -3   9  449.07    6.30
  -2   3   9  416.53    6.10
   2  -3  -9  420.65    7.09
  -2  -3   9  373.71    4.46
  -2   3   9  404.61    5.05
  -2  -3   9  348.18    7.66
  -2   3   9  366.59    6.37
  -5  -3   5   22.87    1.66
  -5   3   5   17.24    1.80
  -5  -3   5   23.79    1.52
   5  -3  -5   23.19    1.91
  -5   3   5   24.87    2.64
   2   0   8   55.47    3.99
  -2   0  -8   57.23    2.88
   2   0   8   59.89    2.80
   0  10  -6    6.66    2.64
   0 -10  -6    8.89    1.24
   0  10   6    6.98    2.47
   0 -10  -6    7.18    1.49
   0  10  -6    3.72    1.91
   0 -10   6    8.79    2.79
   0 -10  -6    7.89    1.78
   0  10   6    6.86    1.93
   0 -10   6    6.48    3.26
  -3  -5  -6  226.07    4.06
  -3   5  -6  173.79    4.44
   3   5   6  234.68    4.45
   3  -5   6  193.47    4.36
  -3   5  -6  242.61    7.00
   3  -5   6  202.69    4.71
  -4   2  -5  155.31    6.64
   4  -2   5  116.01    3.29
   4   2   5  115.29    2.90
   4  -2   5  139.42    4.08
  -4  -2  -5  136.10    3.11
  -4   2  -5   86.81    2.98
  -4  -2  -5  101.58    2.55
  -3   7   7   13.55    2.58
  -3  -7   7   18.31    2.15
   3   7  -7    9.28    1.89
  -3   7   7   14.09    1.24
  -3  -7   7    9.15    1.45
   3  -7  -7   16.93    2.43
   3  -7  -7   15.88    1.93
   1  -4  -9  179.76    4.31
  -1  -4   9  175.78    4.49
  -1   4   9  155.04    3.03
  -1   4   9  152.29    3.97
   1   4  -9  166.94    4.76
  -1   4   9  152.36    4.05
  -1  -4   9  158.73    4.32
  -1  -4   9  145.20    5.40
  -1  -4   9  170.51    4.03
   1   7  -8  163.76    4.88
  -1  -7   8  186.43    4.18
  -1  -7   8  131.35    3.66
  -1   7   8  214.14    5.34
  -1  -7   8  162.73    5.83
  -1   7   8  217.37    4.92
  -1   7   8  172.30    2.73
  -3  11   0    6.65    2.92
   3  11   0    6.38    2.08
  -3 -11   0    3.85    0.63
  -3  11   0    4.89    1.56
   3 -11   0    6.56    1.82
   3 -11   0    7.02    1.47
   2  -1   8   10.53    3.46
   2   1   8   11.71    2.33
  -2  -1  -8   10.99    1.85
  -2   1  -8    7.80    1.75
   2  -1   8   12.05    2.27
   2   1   8   10.87    3.16
   2  -1   8   10.52    2.16
   2   1   8   11.03    1.92
   3 -11  -2   11.57    1.95
   3 -11  -2   14.58    1.40
  -3 -11   2   14.25    1.53
  -3 -11   2   12.22    2.50
   3  11  -2    9.83    1.75
   3 -11  -2   13.89    1.93
   4  -9   0    0.52    1.15
  -4   9   0    0.28    1.40
   4  -9   0    0.41    1.60
   4   9   0    0.69    1.50
  -5   3  -2   14.50    3.37
   5   3   2   15.52    1.25
  -5   3  -2    9.92    1.26
   5  -3   2   13.34    1.42
   5  -3   2   14.51    1.87
   1 -13   0    1.76    2.89
  -1 -13   0    1.34    2.14
  -1 -13   0    0.77    1.92
  -1  13   0    0.39    1.54
   1 -13   0    0.79    1.66
   1  13   0    0.88    1.44
  -1  13   0    0.85    2.27
  -1 -13   0    0.19    1.96
   1  13   0    1.13    2.15
  -2  -8  -6  324.14    5.31
   2   8   6  327.36    5.33
   2  -8   6  290.33    5.70
  -2   8  -6  262.71    6.46
   2  -8   6  288.91    6.50
   2   8   6  315.64    5.71
   4  -8   2  455.88    6.70
   4   8   2  469.19    5.72
  -3   5   8  217.81    3.40
  -3  -5   8  269.84    5.25
  -3   5   8  205.14    4.90
   3  -5  -8  250.48    5.31
  -3  -5   8  148.40    5.46
   3   5  -8  184.28    4.69
  -3   5   8  237.54    5.61
  -3   5   8  254.40    5.21
  -3  -5   8  177.73    3.79
   4   7   3  142.43    3.64
  -4  -7  -3  144.99    2.31
   4  -7   3  111.88    3.27
   4  -7   3  116.06    3.55
  -4   7  -3  135.31    5.41
   1 -13  -1    3.29    2.77
  -1  13   1    1.91    1.54
  -1  13   1    2.53    2.51
   1  13  -1    2.39    1.67
   1  13  -1    2.14    2.13
  -1 -13   1    1.78    2.13
   1 -13  -1    0.01    1.56
  -1 -13   1    2.64    2.18
  -1 -13   1    0.90    1.57
   2  -6   7   99.69    4.65
  -2  -6  -7  124.05    3.50
  -2   6  -7  114.06    4.95
   2   6   7  137.36    4.02
  -2   6  -7   86.68    3.57
   2  -6   7  113.71    4.08
   2   6   7  145.50    4.19
  -5   6   2    4.81    2.62
  -5  -6   2    5.15    0.97
   5  -6  -2    4.32    1.63
   5  -6  -2    4.26    1.46
   5  -6  -2    3.66    1.18
   0 -12  -4    6.46    1.42
   0 -12  -4    6.86    1.67
   0  12   4    5.14    1.66
   0 -12   4    5.48    3.08
   0  12  -4    5.68    2.26
   0  12   4    4.19    2.47
   0 -12   4    3.64    1.49
   0 -12   4    6.76    2.51
   0  12  -4    3.61    1.78
   2   2   8  227.16    5.35
   2  -2   8  209.24    5.04
   2  -2   8  192.01    5.53
   2   2   8  218.00    3.93
   2   2   8  259.67    5.46
  -2   2  -8  183.00    4.69
  -2  -2  -8  201.74    4.46
  -2  -2  -8  250.96    4.48
   2  -2   8  210.08    4.73
   1   9  -7   95.67    3.82
  -1  -9   7   96.33    4.81
  -1  -9   7  148.23    4.55
   1  -9  -7  137.03    3.20
   1  -9  -7  131.94    4.18
  -1   9   7  159.01    4.42
  -1  -9   7   81.72    2.79
  -1   9   7  139.57    4.50
  -1  -9   7   83.27    3.01
  -5  -5   4  162.70    2.91
  -5   5   4  159.09    4.81
   5  -5  -4  164.16    4.06
   4  -9  -3   26.80    1.56
  -4   9   3   28.68    3.24
  -4  -9   3   29.20    1.58
   4  -9  -3   24.21    2.11
   4  -9  -3   22.30    2.00
  -5   6   1   79.56    2.68
  -5   6   1   80.63    3.84
  -1  12   4   18.93    2.79
  -1 -12   4   21.53    2.70
  -1  12   4   20.25    1.85
   1 -12  -4   21.15    1.47
   1 -12  -4   19.21    2.08
  -1 -12   4   21.36    3.28
  -1 -12   4   14.36    2.31
   1 -12  -4   21.71    1.83
   1  12  -4   18.81    2.50
   0 -13   2    4.30    2.10
   0 -13  -2    4.13    1.57
   0 -13  -2    4.06    1.70
   0 -13   2    2.02    1.69
   0  13  -2    5.65    2.40
   0  13   2    2.97    2.26
   0 -13  -2    3.82    0.98
   0 -13   2    4.72    2.70
   0  13  -2    2.35    1.64
   0  13   2    3.99    1.47
   1  -8   7    2.22    3.73
  -1   8  -7    0.38    2.68
   1   8   7    0.82    1.75
  -1  -8  -7    1.21    1.33
   1  -8   7    1.84    2.79
   1   8   7    1.12    2.11
   3   0   7  846.29    8.29
  -3   0  -7  825.18    9.08
  -4   3  -5  325.63    5.45
  -4   3  -5  578.96   11.03
  -4  -3  -5  423.75    4.91
   4  -3   5  442.09    6.17
   4   3   5  421.39    5.76
   4   3   5  458.87    5.31
   4  -3   5  465.96    6.64
   0  -7   8  184.35    5.05
   0  -7  -8  176.84    4.56
   0   7   8  189.72    4.85
   0   7  -8  149.25    5.62
   0  -7   8  116.69    3.65
   0  -7   8  172.28    6.06
   0   7   8  180.01    4.52
   0  -7  -8  192.64    3.96
   0   7  -8  122.63    4.66
  -2  12   3   11.48    2.75
   2 -12  -3   15.68    1.43
  -2 -12   3   13.14    2.04
   2 -12  -3   13.31    1.83
  -2  12   3    8.90    1.64
   2 -12  -3   12.53    1.96
  -2 -12   3   12.22    2.15
  -2 -12   3   11.22    2.74
   2  12  -3   10.88    1.92
  -1 -13  -1   46.60    2.37
  -1  13  -1   41.21    2.71
  -1 -13  -1   61.32    2.20
   1  13   1   56.84    2.60
   1 -13   1   65.76    3.83
  -1  13  -1   51.77    3.43
   1  13   1   47.11    3.05
  -1 -13  -1   47.32    2.35
   1 -13   1   59.07    2.87
  -5   5  -1  259.42    4.86
  -5   5  -1  276.02    6.98
   5  -5   1  278.12    5.10
   5  -5   1  286.52    4.48
   3  -1   7   16.55    2.05
  -3  -1  -7   17.51    1.91
   3   1   7   17.47    2.20
   3   1   7   16.57    2.15
   3  -1   7   19.91    2.55
   3   1   7   17.29    2.00
  -3  -1  -7   18.91    2.09
  -3   1  -7   13.09    1.93
   0  -4  -9  202.44    4.97
   0   4   9  187.24    3.31
   0  -4   9  184.07    4.88
   0   4   9  199.33    4.62
   0  -4  -9  195.38    3.65
   0  -4   9  179.27    5.83
   0  -4   9  208.07    4.92
  -5   0   6   -0.20    1.48
  -5   0   6   -0.18    1.49
   5   0  -6   -0.06    1.27
  -5   0   6    0.07    1.72
  -5   0   6   -0.32    1.12
  -2   4   9    9.93    2.23
  -2  -4   9    7.91    1.50
  -2   4   9    9.14    2.33
  -2  -4   9    9.96    2.12
   2  -4  -9   10.23    1.79
   2   4  -9    7.91    1.88
  -2   4   9    8.80    2.43
  -2  -4   9    5.18    3.05
  -2   4   9    9.55    1.33
  -2  -4   9    8.46    1.91
  -3  11  -1  471.53    8.17
   3 -11   1  472.69    6.15
   3  11   1  473.73    6.17
  -5  -4   5    0.46    2.63
  -5  -4   5    0.50    1.16
  -5   4   5    0.59    2.19
   5  -4  -5    0.76    1.33
  -5   4   5   -0.09    1.44
   0   9  -7   26.48    2.72
   0   9  -7   28.84    3.06
   0  -9  -7   40.08    2.52
   0   9   7   42.08    2.64
   3 -11  -3   18.75    1.36
  -3 -11   3   16.60    2.83
  -3  11   3   12.77    1.76
   3  11  -3   12.28    1.88
   3 -11  -3   17.26    2.02
   3 -11  -3   18.27    2.00
  -3 -11   3   21.51    1.93
   5  -6  -3  118.87    3.50
  -5  -6   3  113.79    2.34
   5  -6  -3  111.73    3.30
  -5   6   3  120.60    4.36
  -5  -1   6   10.67    1.62
  -5  -1   6   14.67    1.82
  -5  -1   6   12.64    1.40
  -5   1   6    7.08    1.67
  -5   1   6   12.00    1.84
  -5   1   6   13.07    1.46
   5  -1  -6   13.40    1.71
   1   0   9 1157.12   11.69
   1   0   9 1133.32    9.21
  -2 -10   6    0.94    1.41
   2 -10  -6    1.80    1.41
  -2  10   6    1.65    1.77
  -2 -10   6    0.30    2.78
   2  10  -6    0.67    1.79
   2 -10  -6    1.45    0.80
   2 -10  -6    2.26    1.65
  -2  10   6    0.03    2.42
  -2 -10   6    1.85    2.30
   1 -13  -2    3.61    2.40
  -1  13   2    2.18    2.43
   1  13  -2    0.65    1.58
  -1  13   2    1.87    1.50
  -1 -13   2    2.73    2.64
   1 -13  -2    1.64    1.60
  -1 -13   2    2.55    2.52
   1  13  -2    1.82    2.21
  -2  -7   8  211.11    6.19
  -2   7   8  265.37    3.61
   2   7  -8  210.47    5.31
  -2   7   8  351.00    6.52
  -2  -7   8  304.49    6.04
  -2  -7   8  198.30    4.13
  -2   7   8  276.46    6.10
   2  -7  -8  312.57    6.22
   2 -12   2  196.70    4.55
   2  12   2  190.55    4.56
   2 -12   2  201.58    4.87
   4  -5  -7  295.98    5.62
  -4   5   7  329.59    4.20
  -4  -5   7  291.92    7.10
  -4  -5   7  327.11    4.05
  -4  -5   7  385.67    5.61
  -4   5   7  260.43    5.14
   4   5  -7  225.23    5.00
  -4   5   7  409.23    6.47
  -3   0   9  445.99    6.81
  -3   0   9  449.62    8.19
  -4   0   8  145.00    3.33
  -4   0   8  130.10    5.06
  -4   0   8  161.79    2.93
   4   0  -8  116.11    3.62
  -4   0   8  116.66    3.57
  -1  -6  -8    0.74    1.39
  -1   6  -8   -0.20    3.46
  -1   6  -8   -0.02    1.75
   1   6   8    0.70    1.98
   1  -6   8    0.13    3.25
   1   6   8    0.87    1.88
   1  -6   8    1.01    2.40
   3  -9   4  520.52    7.44
   3  -9   4  455.03    6.52
   3   9   4  694.07    7.47
   3   9   4  570.89    7.24
  -3   9  -4  318.60    6.21
  -3  -9  -4  613.91    6.59
  -3   9  -4  406.57    8.30
   4   9   1    0.35    1.77
   4  -9   1    1.67    1.73
   4  -9   1    0.52    1.31
  -4   9  -1    0.27    1.46
  -5   6   0   12.65    1.58
   5  -6   0   14.99    1.98
  -5   6   0   12.96    3.32
   1   1   9  118.38    3.41
  -1   1  -9  121.08    4.33
  -1  -1  -9  114.64    3.92
   1  -1   9  111.19    3.51
   1   1   9  119.82    4.41
   2   3   8   30.05    2.43
   2  -3   8   24.12    2.63
  -2   3  -8   19.41    2.21
  -2  -3  -8   24.77    2.05
  -2  -3  -8   28.56    1.70
   2  -3   8   26.34    3.89
  -2  -3  -8   28.93    2.16
   4  -6   4  335.38    5.64
  -4  -6  -4  369.25    3.96
   4   6   4  406.78    5.66
   4  -6   4  331.96    5.80
  -4   6  -4  282.89    7.44
  -3   1   9    8.10    2.09
  -3  -1   9    8.79    2.11
  -3  -1   9   10.67    1.78
  -3   1   9    9.45    1.56
  -3   1   9    5.37    2.61
  -3   1   9    7.98    2.10
  -3  -1   9    8.37    2.82
   3  -1  -9   10.65    1.85
  -3  -1   9    8.69    1.78
   3   1  -9    8.06    1.75
  -4  -8   5   41.59    2.13
   4  -8  -5   45.14    2.72
  -4  -8   5   53.15    2.31
   4  -8  -5   49.03    2.53
  -4   8   5   52.75    3.40
   4   1  -8   63.38    2.87
  -4  -1   8   71.59    2.89
  -4   1   8   69.95    3.08
   4  -1  -8   75.60    3.11
  -4  -1   8   56.76    3.93
  -4   1   8   66.38    4.07
  -4   1   8   88.17    2.64
  -4   1   8   99.84    2.98
   3  -2   7  467.41    6.54
   3  -2   7  460.81    6.57
   3   2   7  561.10    8.37
  -3  -2  -7  444.65    5.99
  -3  -2  -7  547.73    6.18
   3   2   7  458.25    5.92
   2 -11  -5  492.90    6.33
   2 -11  -5  646.74    8.71
   2 -11  -5  519.20    4.05
  -2 -11   5  483.39    8.47
  -2 -11   5  659.09    8.04
  -2  11   5  535.34    6.56
  -2 -11   5  347.39    3.97
   2  11  -5  372.45    6.64
   5   4   2    3.33    1.05
  -5   4  -2    3.30    3.07
  -5   4  -2    2.79    1.36
   5  -4   2    4.03    1.70
   5  -4   2    2.78    1.23
   3 -10   3    9.78    2.06
  -3 -10  -3   10.54    1.52
  -3  10  -3    8.18    2.88
   3 -10   3    9.67    1.78
   3  10   3   10.16    1.97
  -3  10  -3    4.78    1.78
  -1  -5   9   72.57    4.41
  -1   5   9   88.82    2.38
  -1  -5   9   98.45    3.62
  -1   5   9  103.32    3.79
  -1   5   9  119.57    4.13
   1  -5  -9  102.64    3.46
   1   5  -9   73.70    3.45
  -1  -5   9   78.61    3.18
   5   0   3  265.41    4.46
   5   0   3  248.94    4.04
   3   9  -6   39.28    2.69
  -3   9   6   58.74    3.79
  -3  -9   6   64.69    2.99
  -3   9   6   53.63    2.73
   3  -9  -6   71.86    3.21
   3  -9  -6   70.03    2.91
   3  -9  -6   68.27    3.25
  -3  -9   6   44.65    3.68
  -5  -2   6  163.82    3.24
  -5  -2   6  171.21    3.96
   5  -2  -6  164.20    3.97
  -5  -2   6  102.16    4.69
  -5   2   6  169.67    4.05
  -5  -2   6  135.38    3.06
  -5   2   6  109.22    3.41
   5  -1   3  249.27    4.41
   5   1   3  240.31    3.86
   5  -1   3  241.93    4.06
  -3 -10   5   41.07    3.48
  -3 -10   5   52.85    2.56
  -3  10   5   53.73    3.48
  -3  10   5   49.35    2.72
   3 -10  -5   51.42    2.50
   3 -10  -5   55.22    2.95
   3 -10  -5   63.23    3.16
   3  10  -5   37.63    2.59
   3 -10  -5   53.94    1.75
  -4   7   6   22.78    2.21
  -4   7   6   28.81    3.15
   4  -7  -6   28.60    2.15
   4   7  -6   16.94    1.97
  -4  -7   6   20.78    3.28
   4  -7  -6   33.38    2.51
  -4  -7   6   27.81    2.11
   1  11   5  103.82    3.82
  -1 -11  -5  112.33    3.77
   1  11   5  116.20    3.61
   1 -11   5   97.50    5.05
   1 -11   5  107.70    4.12
   3  -6   6   15.96    2.36
  -3   6  -6   10.01    2.04
  -3   6  -6   13.76    3.19
   3   6   6   19.26    2.18
   3   6   6   16.85    2.06
   3  -6   6   16.62    2.08
  -3  -6  -6   19.01    1.74
   1  -2   9  248.30    4.94
  -1   2  -9  214.21    5.31
   1  -2   9  258.85    5.60
   1   2   9  314.17    6.14
   1   2   9  273.76    6.03
   1   2   9  232.51    3.93
   1  -2   9  197.13    5.54
  -1  -2  -9  241.12    5.27
  -3   2   9  100.72    3.77
   3   2  -9   95.75    3.60
  -3   2   9  125.86    3.17
  -3  -2   9  141.95    3.71
   3  -2  -9  124.10    4.12
  -3  -2   9   83.64    4.36
  -3  -2   9  101.29    3.39
  -3   2   9  103.54    4.14
  -3   2   9  117.55    3.55
  -4  -2   8  189.78    5.76
  -4   2   8  225.63    6.22
  -4   2   8  216.56    4.75
   4  -2  -8  211.20    4.76
  -4  -2   8  244.39    4.45
   4   2  -8  212.72    4.61
   4   4   5  282.90    4.12
  -4  -4  -5  255.48    3.72
   4  -4   5  273.31    5.09
   4   4   5  354.61    6.03
  -4   4  -5  334.34    8.39
   4  -4   5  269.41    5.22
  -4   4  -5  175.51    4.18
  -2  -9   7  126.59    3.06
  -2  -9   7  209.48    5.08
  -2  -9   7  121.19    5.09
  -2   9   7  192.49    5.36
   2  -9  -7  198.29    4.99
   2   9  -7  129.95    4.27
  -2   9   7  195.07    4.79
   1 -13   2    1.70    2.35
   1 -13   2    0.46    3.29
   1  13   2    0.94    2.33
  -1  13  -2    0.81    2.49
  -1 -13  -2    1.43    1.47
  -1 -13  -2    0.59    1.56
  -1 -13  -2    1.08    2.12
  -1  13  -2    0.64    1.74
  -4   9   4   74.60    3.07
  -4   9   4   97.54    4.44
   4  -9  -4   79.72    3.13
   4  -9  -4   82.78    3.06
  -4  -9   4  106.77    2.85
  -4  -9   4   59.28    3.92
   4  -9  -4   94.86    2.49
   3  -8   5   21.90    2.48
   3  -8   5   19.43    2.06
  -3  -8  -5   25.23    1.80
   3   8   5   23.55    1.97
   3   8   5   22.48    2.28
  -3   8  -5   21.81    3.51
  -1  10  -6   80.84    4.12
   1  10   6  109.27    3.42
  -1 -10  -6  116.06    3.87
   1  10   6  100.93    3.87
   1 -10   6   88.96    5.10
  -3  -6   8   22.18    2.07
  -3   6   8   31.64    1.65
  -3  -6   8   32.80    2.44
  -3  -6   8   22.88    3.31
   3   6  -8   19.82    2.26
   3  -6  -8   32.82    2.51
  -3   6   8   27.46    2.54
  -3   6   8   30.64    2.93
   5  -2   3   29.12    2.15
  -5   2  -3   34.60    4.31
   5  -2   3   28.75    1.80
   5   2   3   29.36    1.59
  -2 -10  -5  356.78    5.79
   2 -10   5  297.34    6.57
  -2  10  -5  266.46    6.68
   2  10   5  348.70    5.14
  -2  10  -5  264.78    6.08
   2  10   5  319.79    5.58
   2 -10   5  336.59    6.42
   3  -3   7   17.38    2.45
   3   3   7   23.31    2.49
  -3   3  -7   12.17    1.98
  -3   3  -7   22.03    4.77
  -3  -3  -7   20.41    1.81
   3   3   7   21.13    2.07
   3  -3   7   17.15    2.15
   2  11   4  160.62    3.59
   2  11   4  137.16    4.13
  -2  11  -4  108.58    4.47
  -2 -11  -4  156.71    4.09
   2 -11   4  130.44    4.75
   1 -12   4   38.33    2.95
   1 -12   4   42.62    4.27
  -1  12  -4   32.01    3.12
  -1 -12  -4   39.84    2.59
  -1  12  -4   24.53    2.42
   1  12   4   30.82    2.87
   1  12   4   38.09    2.32
   0 -13   3  117.17    3.38
   0 -13  -3  160.09    4.70
   0 -13  -3  150.43    3.24
   0  13   3  153.90    3.59
   0 -13   3  163.41    4.63
   0 -13   3  176.80    5.35
   0  13  -3  157.17    4.54
   0  13   3  124.78    4.52
   0  13  -3   88.16    3.68
   5  -6  -4   34.62    2.33
   5  -6  -4   31.54    2.14
  -5   6   4   32.77    3.37
  -5  -6   4   37.10    1.73
   0  -5   9  161.38    5.89
   0   5   9  236.54    5.63
   0   5  -9  132.68    4.66
   0  -5   9  160.37    4.54
   0  -5  -9  192.47    4.94
   0  -5   9  190.57    4.86
   0   5   9  167.86    2.95
   0   5   9  208.93    5.03
   3   8  -7  107.65    3.89
   3  -8  -7  190.76    4.85
  -3   8   7  160.11    4.48
  -3   8   7  174.91    4.92
   3  -8  -7  202.29    4.74
  -3  -8   7  103.75    5.02
  -3  -8   7  135.67    2.60
  -3  -8   7  203.74    4.76
  -5   3   6  378.11    5.89
  -5  -3   6  272.89    7.11
   5  -3  -6  312.77    5.36
  -5  -3   6  409.64    5.07
  -5   3   6  286.13    4.92
  -2  -5   9   75.79    2.99
  -2   5   9   94.73    2.52
  -2  -5   9   79.22    2.08
  -2   5   9   96.75    3.93
   2   5  -9   68.26    3.45
  -2  -5   9   71.98    4.56
   2  -5  -9  106.90    3.90
  -2  -5   9  108.53    3.63
   5  -5  -5   14.51    1.83
  -5   5   5    9.72    1.78
  -5   5   5   14.68    2.84
   5  -5  -5   12.89    1.79
  -5  -5   5   15.52    1.50
  -5  -5   5    7.34    3.06
   1   8  -8    9.21    2.27
  -1   8   8   11.19    1.11
  -1   8   8   12.58    2.21
  -1   8   8   11.97    2.65
   1  -8  -8   11.67    2.00
  -1  -8   8   13.03    3.51
  -1  -8   8    8.15    2.01
   2   4   8  368.03    6.13
  -2   4  -8  268.83    6.00
   2  -4   8  301.56    6.81
  -2  -4  -8  334.67    5.80
   2  -4   8  324.63    6.12
  -2   7  -7    4.89    1.91
  -2   7  -7    7.01    3.21
  -2  -7  -7   10.40    1.63
   2   7   7    8.52    1.86
   2  -7   7   10.00    3.92
   2   7   7   10.52    2.24
   2  -7   7    7.56    2.46
   3  11   2   58.71    2.93
   3 -11   2   55.88    2.68
   1 -13  -3   38.17    2.37
  -1 -13   3   46.69    3.18
   1 -13  -3   43.90    2.90
   1  13  -3   38.94    2.80
  -1 -13   3   56.91    3.78
   1  13  -3   27.42    2.25
  -1  13   3   40.15    2.25
  -1  13   3   36.40    3.35
   1  -3   9   33.42    2.77
   1   3   9   30.66    1.94
   1  -3   9   27.52    3.59
  -1  -3  -9   29.60    2.34
   1  -3   9   34.09    3.23
  -1   3  -9   26.88    2.59
   1   3   9   33.60    2.64
   2 -12  -4  121.51    4.24
  -2 -12   4  106.60    4.53
  -2  12   4  104.37    3.27
   2  12  -4   80.67    3.45
   2 -12  -4   98.71    3.32
   2 -12  -4  126.24    2.45
  -2 -12   4  121.03    3.72
   5  -7  -2    0.25    1.18
  -5  -7   2    0.48    0.86
  -5   7   2    0.68    2.78
   5  -7  -2    0.03    1.59
   5  -7  -2    0.30    1.37
   5  -6   1   12.57    1.97
  -5   6  -1   11.87    3.51
  -3  -3   9   93.09    4.43
  -3  -3   9  126.28    3.76
  -3   3   9  124.12    3.86
   3   3  -9   92.80    3.83
  -3   3   9   89.98    4.15
   3  -3  -9  107.63    3.76
  -3   3   9  108.00    4.09
  -3  -3   9   89.98    3.25
  -3   3   9  108.79    2.86
  -4   3   8  109.31    3.69
  -4  -3   8   83.50    4.54
  -4  -3   8  101.04    3.07
  -4  -3   8   83.60    2.80
  -4   3   8  103.71    2.68
  -4   3   8   79.47    3.18
   4   3  -8   67.46    2.91
   4  -3  -8   89.06    3.36
  -4   3   8   78.36    3.89
   5  -7  -1   40.01    2.43
  -5   7   1   32.39    3.50
   5  -7  -1   38.17    1.96
   4 -10  -1   66.82    2.31
  -4  10   1   46.52    2.57
   3 -11  -4  306.61    3.80
  -3  11   4  275.29    5.04
  -3  11   4  334.75    6.88
  -3 -11   4  325.75    4.87
   3 -11  -4  310.73    5.30
   3 -11  -4  314.27    6.31
  -3 -11   4  269.62    6.25
   4   8   3   15.36    1.96
  -4   8  -3    7.44    1.76
  -4   8  -3   13.40    3.47
   4  -8   3   13.62    2.07
  -4  10   2   11.57    3.11
   4 -10  -2   11.58    1.88
   4 -10  -2   10.21    1.84
   4 -10  -2   12.52    1.34
  -4 -10   2   13.20    1.23
  -4 -10   2   11.16    2.76
   5  -5   2  468.74    6.68
   5  -5   2  449.80    5.68
   5   5   2  452.25    5.15
   5  -3   3   54.98    2.25
   5   3   3   53.38    1.93
   5  -3   3   55.88    2.61
  -5   3  -3   61.27    4.68
   4  -6  -7   32.47    2.47
  -4  -6   7   33.85    2.32
  -4   6   7   33.73    1.68
  -4   6   7   34.97    3.04
   1 -11  -6  225.72    3.85
   1 -11  -6  229.48    3.84
   1 -11  -6  219.05    5.36
  -1  11   6  226.08    5.03
  -2  13   1   76.62    3.82
  -2 -13   1   90.51    3.42
   2 -13  -1   86.39    3.28
   2 -13  -1   89.88    2.60
   2  13  -1   78.47    3.03
   2  13  -1   82.02    3.14
  -2  13   1   80.50    3.14
  -2   9  -6   53.23    3.85
   2   9   6   71.29    3.46
   2   9   6   69.60    2.93
  -2  -9  -6   44.80    2.94
  -2   9  -6   40.11    2.74
   2  -9   6   59.03    3.28
  -4   9  -2  109.00    4.80
   4  -9   2  106.68    3.63
   4  -9   2  107.24    3.24
  -2 -13   0   38.16    2.41
   2 -13   0   37.46    2.49
   2 -13   0   41.74    2.35
  -2  13   0   34.60    3.20
  -2  13   0   26.12    2.46
  -2 -13   0   20.54    1.77
   2  13   0   36.23    2.38
   2  13   0   34.66    2.70
   0  -8   8   71.79    3.79
   0   8   8   73.15    3.57
   0  -8  -8   77.22    3.39
   0   8   8   71.19    3.20
   4 -10   0  253.24    4.43
  -4  10   0  189.82    4.36
   5  -7  -3    4.52    1.74
  -5   7   3    4.01    2.67
  -5  -7   3    4.39    1.03
   5  -7  -3    4.18    1.58
   2  12   3  148.88    4.35
  -2 -12  -3  162.79    4.23
   2 -12   3  158.40    4.61
   2 -12   3  157.31    4.75
  -1   6   9   96.24    3.77
  -1   6   9   90.59    3.76
  -1   6   9   87.37    2.22
  -1  -6   9   95.85    3.88
   1   6  -9   78.37    3.73
  -1  -6   9   78.87    4.80
  -1  -6   9   66.00    3.15
   0  11  -6    4.99    2.88
   0 -11   6    5.51    3.31
   0 -11   6    7.58    2.83
   0  11   6    6.59    2.76
   0  11   6    6.26    2.21
   0 -11  -6    6.25    1.74
   0 -11  -6    6.98    1.35
   0  11  -6    4.03    1.77
  -3   4  -7   51.75    2.95
  -3   4  -7  100.74    6.25
   3   4   7   92.41    3.60
   3  -4   7   71.36    3.29
  -3  -4  -7   87.52    3.04
   3  -4   7   70.74    3.43
   4  -5   5   17.88    2.28
  -4   5  -5   19.58    3.55
   4  -5   5   18.03    2.00
   4   5   5   23.33    2.38
  -4  -5  -5   20.00    1.45
   1  -7   8    3.11    3.39
   1  -7   8    3.83    2.60
  -1  -7  -8    4.52    1.55
  -1   7  -8    2.01    2.08
   1   7   8    4.41    2.19
  -1   7  -8    2.79    3.61
   1 -12  -5  167.67    4.69
  -1  12   5  187.93    4.47
  -1  12   5  155.01    5.20
   1 -12  -5  209.86    4.21
  -1 -12   5  163.57    5.69
  -1 -12   5  184.57    5.13
  -5   7   0   22.39    3.50
   5  -7   0   29.24    1.82
   5  -7   0   28.25    2.26
  -1   0  10   -0.01    2.56
   1   0 -10    0.72    1.77
  -1   0  10   -0.04    1.88
  -1   0  10    0.60    1.99
  -1   0  10   -0.22    1.65
   1   9   7    1.34    1.81
  -1  -9  -7    1.92    1.44
  -1   9  -7    1.27    2.69
   1  -9   7    2.99    3.00
   1   9   7    2.09    2.18
   0 -12   5    2.04    2.82
   0 -12   5    1.69    3.13
   0 -12  -5    1.91    1.68
   0  12   5    1.25    1.66
   0  12   5    0.99    2.57
   0 -12  -5    1.67    1.30
   0  12  -5    1.46    1.91
   0  12  -5    0.63    2.35
   3 -12  -1   62.83    2.42
  -3  12   1   62.37    3.93
   3 -12  -1   52.77    2.86
  -3 -12   1   50.71    3.33
   4  -7   4   11.45    2.11
   4   7   4   11.25    2.05
   4  -7   4   11.16    1.94
  -4   7  -4    6.98    1.91
  -4   7  -4    8.78    3.45
  -5  -4   6   37.66    1.96
  -5   4   6   40.35    3.11
  -5   4   6   36.68    1.83
   5  -4  -6   34.16    2.32
  -1  -1  10   13.68    2.04
  -1   1  10   12.58    2.87
  -1   1  10   10.85    2.17
   1  -1 -10   14.17    2.11
  -1  -1  10   12.36    1.95
  -1  -1  10    7.56    2.82
   1   1 -10   11.21    2.31
  -1   1  10   14.72    2.47
  -1  -1  10   11.77    2.34
  -1   1  10   15.08    1.96
   2 -13  -2  141.16    3.82
   2 -13  -2  154.75    3.15
  -2 -13   2  139.79    3.59
  -2 -13   2  142.60    4.24
   2 -13  -2  141.28    4.52
  -2  13   2  158.44    5.13
   1  10  -7    0.02    1.98
  -1 -10   7   -0.59    3.21
  -1  10   7    0.40    2.56
  -1  10   7   -0.37    2.14
   1 -10  -7    0.37    1.65
   1 -10  -7    0.36    1.28
  -1 -10   7   -0.58    2.46
  -2  -8   8  205.29    5.18
  -2   8   8  185.75    5.18
  -2   8   8  237.76    5.95
   2  -8  -8  210.87    5.27
  -2  -8   8  150.75    3.79
  -2   8   8  176.21    2.90
   2   8  -8  128.35    4.52
   4 -10  -3   39.79    2.60
   4 -10  -3   40.70    1.79
   4 -10  -3   42.08    2.53
  -4  10   3   39.24    3.58
  -4 -10   3   46.21    1.87
  -4   0  -6   84.09    2.95
   4   0   6  105.92    3.22
   0 -14   0  424.52    6.02
   0  14   0  451.96    7.46
   1   4   9  213.96    5.43
   1  -4   9  137.54    5.32
   1  -4   9  176.46    5.36
   1   4   9  184.38    4.70
  -1  -4  -9  163.89    4.51
   1  -4   9  161.16    4.66
  -1   4  -9  139.73    4.65
  -3  12   0  157.13    5.32
   3 -12   0  164.80    4.49
   3 -12   0  175.25    3.87
  -3   4   9   31.37    2.90
  -3   4   9   23.62    2.97
  -3  -4   9   21.66    2.24
   3   4  -9   21.31    2.35
  -3   4   9   31.72    1.81
   3  -4  -9   29.50    2.45
  -3   4   9   28.23    2.84
  -3  -4   9   25.82    3.40
  -4   4   8   14.68    2.18
   4  -4  -8   17.11    2.04
  -4   4   8   19.81    1.52
  -4  -4   8   19.97    2.04
  -4  -4   8   11.80    3.29
  -4   4   8   24.53    2.94
   4   4  -8   14.62    2.02
  -4  -4   8   17.10    1.82
   3   7   6   17.39    2.33
  -3  -7  -6   17.81    1.75
   3  -7   6   13.19    2.21
   3   7   6   15.84    2.32
  -3   7  -6    9.85    2.21
  -3   7  -6   13.13    3.49
   3  -7   6   13.05    2.42
   3 -12  -2   25.74    2.37
  -3 -12   2   28.54    1.82
  -3  12   2   32.07    3.62
   3 -12  -2   29.55    2.30
  -3 -12   2   26.30    2.83
   3 -12  -2   31.23    1.82
   1 -13   3   34.12    3.92
   1  13   3   26.25    2.92
  -1  13  -3   28.69    3.18
  -1 -13  -3   31.32    2.44
   1 -13   3   32.50    2.86
  -1  13  -3   20.75    2.31
   2 -13   1    0.74    1.73
  -2  13  -1    1.19    2.76
   2  13   1    0.38    2.16
   2  13   1    0.08    1.52
   2 -13   1    0.43    1.97
  -2  13  -1    0.15    1.77
  -4  -1  -6  181.68    3.82
   4   1   6  232.02    4.29
   4  -1   6  244.76    4.76
   4  -1   6  228.59    4.50
  -4   1  -6  181.39    4.36
   2  -5   8   75.05    3.83
   2  -5   8   72.71    4.73
  -2   5  -8   81.96    5.73
  -2  -5  -8   77.71    2.95
   1   2 -10    9.66    2.16
  -1   2  10    6.60    2.71
  -1  -2  10   10.40    2.05
  -1   2  10    8.64    2.41
  -1  -2  10    5.90    3.09
  -1  -2  10   12.11    2.61
  -1   2  10    9.41    2.32
  -1   2  10    9.91    1.61
  -1  -2  10    6.65    1.85
   0 -14   1  178.22    4.36
   0  14   1  144.59    4.17
   0  14  -1  141.43    4.21
   0  14  -1  160.64    4.39
   0 -14  -1  183.53    4.25
   0  14   1  141.36    4.64
   5   4   3  368.08    4.46
   5  -4   3  357.75    5.22
   5  -4   3  372.22    5.83
   4  -8  -6   43.17    2.52
  -4  -8   6   43.13    2.39
   4  -8  -6   36.58    2.50
  -4   8   6   47.62    3.69
  -4  -9   5  363.39    5.07
  -4   9   5  359.45    7.18
   4  -9  -5  340.65    5.70
   0 -10  -7   77.63    2.25
   0 -10  -7   80.28    3.48
   0 -10   7   55.73    4.46
   0  10   7   70.93    3.17
   0 -10   7   69.28    3.82
   0  10  -7   49.61    3.58
  -2   0  10  245.85    4.48
   2   0 -10  256.04    5.74
  -2   0  10  257.41    4.83
   5   0  -7    0.92    1.39
  -5   0   7    1.38    1.22
  -5   0   7    0.40    1.50
  -5   0   7    1.03    2.65
   0  -6   9    3.46    2.42
   0  -6   9    3.02    3.38
   0   6  -9    2.01    1.99
   0  -6  -9    3.26    1.72
   0   6   9    5.53    2.43
   0   6   9    3.15    2.28
   0  -6   9    3.15    2.38
   2   6  -9    1.15    2.04
  -2  -6   9    0.55    2.06
  -2  -6   9    0.77    2.95
  -2   6   9    2.03    1.11
  -2   6   9    0.81    2.38
   2  -6  -9    1.92    1.73
  -3   7   8   64.07    2.04
   3  -7  -8   69.14    3.29
   3   7  -8   47.35    3.11
  -3  -7   8   47.45    2.41
  -3  -7   8   71.54    3.25
  -3   7   8   63.75    3.55
   5  -6  -5  342.89    6.15
   5  -6  -5  367.18    6.34
  -5  -6   5  191.96    6.58
  -5  -6   5  314.02    4.46
  -5   6   5  223.94    4.60
  -5   6   5  320.56    6.32
   2  -1 -10   15.77    2.18
  -2   1  10   10.42    2.79
  -2  -1  10   13.11    2.77
  -2   1  10   14.16    1.70
  -2  -1  10   12.83    1.93
   2   1 -10   12.42    2.12
  -2  -1  10   15.86    2.09
  -2   1  10   14.19    2.26
  -2   1  10   12.01    2.48
  -2  -1  10    9.91    2.99
  -5  -1   7   45.46    2.31
   5  -1  -7   50.03    2.54
  -5  -1   7   40.04    3.64
  -5  -1   7   55.16    2.24
   3 -10   4   94.56    3.38
  -3 -10  -4  134.06    3.44
  -3  10  -4   57.96    3.22
   3 -10   4  110.13    3.97
   3  10   4  115.30    3.70
  -3  10  -4   80.26    4.68
  -4   2  -6  248.80    8.68
   4   2   6  177.74    3.76
   4  -2   6  176.60    4.23
   4   2   6  188.95    4.43
  -4   2  -6  114.95    3.55
  -4  -2  -6  147.16    3.31
   4  -2   6  178.73    4.09
  -4  10  -1    0.46    2.89
   4 -10   1    0.18    1.39
   4 -10   1    0.52    1.82
   4  10   1    0.31    1.69
  -4  10  -1   -0.19    1.58
  -5   7   4   82.84    4.17
   5  -7  -4   83.83    3.21
  -5  -7   4   90.45    2.36
   0   0  10    0.83    2.92
   0   0 -10    0.64    1.81
   0   0  10    0.27    1.75
   0   0  10    1.42    1.76
   0   0  10    0.70    2.78
   0  13   4   37.01    2.40
   0  13   4   35.01    3.40
   0 -13  -4   46.15    2.93
   0 -13  -4   45.27    2.15
   0  13  -4   38.16    3.30
   0 -13   4   49.04    4.03
   0  13  -4   25.33    2.59
   0 -13   4   51.15    3.45
  -2 -11   6  273.36    5.62
  -2  11   6  261.37    5.39
   2  11  -6  157.62    5.11
  -2  11   6  216.32    5.70
   2 -11  -6  181.50    4.23
   2 -11  -6  257.85    6.03
  -2 -11   6  177.29    5.84
  -6   0   2  256.90    6.19
   6   0  -2  347.76    5.40
  -3  10   6   25.87    3.31
  -3 -10   6   31.52    2.40
   3  10  -6   17.43    2.23
  -3 -10   6   21.48    3.42
   3 -10  -6   32.13    2.54
  -3  10   6   22.51    2.26
   3 -10  -6   30.02    2.15
   5   6   2    3.14    1.17
  -5   6  -2    4.01    3.35
   5  -6   2    5.03    1.88
   5  -6   2    3.95    1.36
  -5   6  -2    0.30    1.48
  -1  14   0  167.28    4.79
   1  14   0  139.63    4.18
   1 -14   0  192.25    5.07
   1 -14   0  173.58    4.33
  -1  14   0  127.98    4.16
  -1 -14   0  137.16    3.71
  -1 -14   0  212.79    4.43
   1  14   0  149.37    4.51
   1 -13  -4   80.69    3.61
  -1  13   4   74.50    3.90
  -1 -13   4   82.61    4.34
  -1 -13   4   88.60    3.88
  -1  13   4   79.81    2.94
   1 -13  -4   67.12    2.76
   0  -1  10    1.50    2.33
   0  -1  10    1.49    1.91
   0   1 -10    2.31    1.86
   0   1  10    1.54    1.68
   0   1  10    0.82    2.00
   0  -1 -10    1.73    1.64
   0   1  10    0.37    2.75
   0  -1  10    0.45    2.89
  -3  12  -1   23.22    3.48
  -3  12  -1   19.64    2.18
   3 -12   1   30.64    2.20
   3  12   1   31.30    2.65
   3 -12   1   26.42    2.42
  -5   7  -1   12.62    3.66
   5  -7   1   13.89    2.01
   5   7   1   13.59    1.75
   6   1  -2   63.68    2.64
  -6  -1   2   61.66    4.62
   6  -1  -2   61.69    2.75
   3  -5   7   68.16    3.44
   3   5   7   85.20    3.30
   3  -5   7   66.52    3.34
  -3   5  -7   79.87    5.53
  -3  -5  -7   73.94    2.73
  -2   2  10   14.55    1.81
  -2  -2  10   13.96    2.38
  -2  -2  10   14.37    2.05
  -2   2  10   11.38    2.76
   2  -2 -10   12.85    2.15
  -2  -2  10   11.11    3.20
  -2   2  10   15.15    2.43
  -2  -2  10   16.53    2.22
  -2   2  10   10.85    2.57
   2   2 -10   15.29    2.38
  -1  14   1  215.79    4.90
  -1  14   1  242.50    5.67
   1  14  -1  225.36    5.06
   1 -14  -1  273.78    5.11
  -1 -14   1  285.20    5.18
   1 -14  -1  265.51    5.11
  -1 -14   1  220.67    4.83
   1  14  -1  169.90    4.72
  -5  -2   7   97.31    2.81
   5  -2  -7   96.77    3.45
  -5   2   7   69.14    3.11
  -5   2   7  119.50    3.47
  -5  -2   7  119.93    3.12
  -5  -2   7   73.84    4.85
   3  -9   5    0.21    2.14
  -3   9  -5    0.43    3.13
   3   9   5    0.19    2.04
  -3   9  -5    0.17    1.91
  -3  -9  -5    0.60    1.33
   3   9   5    0.56    1.80
  -2  13   3  118.87    4.99
  -2  13   3   98.39    3.29
   2 -13  -3  104.26    3.92
   2  13  -3   85.77    3.52
  -2 -13   3  103.03    3.47
   2 -13  -3   95.81    3.38
   2 -13  -3  116.51    2.62
  -2 -13   3  117.65    4.61
   5   0   4    0.24    1.14
  -3  12   3   16.58    2.03
  -3 -12   3   20.87    2.94
   3 -12  -3   21.32    2.25
   3 -12  -3   22.01    2.17
   3 -12  -3   23.47    1.64
  -3 -12   3   18.79    1.91
  -3  11  -3   46.70    2.98
   3 -11   3   69.76    3.00
  -3 -11  -3   96.71    3.14
   3  11   3   84.09    3.37
  -3  11  -3   62.94    4.04
  -1   3  10   98.50    2.91
   1   3 -10  103.29    4.34
  -1   3  10  108.59    3.70
  -1  -3  10   96.34    3.52
  -6   0   1    0.09    3.23
   6   0  -1   -0.24    1.53
   2   8   7  236.33    4.99
   2  -8   7  178.22    6.08
   2   8   7  235.01    5.26
  -2  -8  -7  232.39    4.84
   2  -8   7  203.47    5.34
  -2   8  -7  134.17    4.88
  -2   8  -7  189.25    6.08
   5  -1   4    0.11    1.28
   5  -1   4    0.30    1.68
   5   1   4    0.19    1.06
  -5   1  -4    0.22    4.70
  -6   0   3   -0.52    2.73
   6   0  -3    0.22    1.60
  -2 -10   7   30.97    2.86
   2 -10  -7   30.03    2.63
  -2  10   7   25.57    2.54
   2  10  -7   15.35    2.29
   2 -10  -7   18.18    2.00
  -2 -10   7   19.46    3.48
  -2  10   7   24.16    3.15
  -2 -10   7   18.04    1.77
  -5  -5   6   83.96    2.63
  -5   5   6   83.98    3.89
  -5   5   6   57.34    2.84
   5  -5  -6   79.99    3.32
  -5  -5   6   45.52    4.30
  -6  -1   1   11.45    4.20
   6   1  -1   18.53    1.87
   6  -1  -1   15.80    1.91
  -6   1   1   12.28    3.30
   0  14   2   56.11    3.61
   0 -14   2   99.91    4.49
   0  14  -2   70.11    3.49
   0 -14  -2   68.78    2.69
   0 -14  -2   74.31    3.49
   0  14   2   74.52    2.69
   0  14  -2   45.98    2.84
   0 -14   2   74.76    3.40
  -5  -8   2   17.59    1.15
  -5   8   2   14.35    3.12
   5  -8  -2   16.99    1.60
   5  -8  -2   17.89    2.12
   5  -8  -2   13.74    1.87
  -3 -11   5   44.96    3.70
  -3 -11   5   55.51    2.81
   3 -11  -5   49.30    1.68
   3 -11  -5   42.18    2.80
   3 -11  -5   51.09    2.56
  -3  11   5   51.99    3.66
  -3  11   5   43.48    2.61
   3  11  -5   35.14    2.75
  -4  -7   7    0.47    2.76
  -4   7   7    0.67    1.72
  -4   7   7    0.82    2.58
   4   7  -7    1.10    1.73
  -4  -7   7    1.37    1.58
   4  -7  -7    1.28    1.71
   4 -10  -4   70.58    2.20
  -4 -10   4   73.58    2.47
  -4  10   4   50.35    2.70
   4 -10  -4   70.28    3.28
  -4  10   4   75.43    4.15
   4 -10  -4   69.55    3.00
  -4 -10   4   45.91    3.67
   5  -8  -1   71.34    3.12
   5  -8  -1   69.45    2.48
  -4   6  -5   79.94    4.99
   4  -6   5   83.03    3.48
   4   6   5   89.09    2.97
  -2 -12   5   32.74    3.67
   2  12  -5   21.05    2.37
  -2 -12   5   48.74    3.09
   2 -12  -5   29.79    2.28
  -2  12   5   37.32    2.46
   2 -12  -5   43.01    2.86
   6   1  -3  309.05    5.20
  -6  -1   3  211.61    5.83
   6  -1  -3  299.38    5.26
  -6   1   3  226.70    5.74
  -3   9   7   45.57    3.13
  -3  -9   7   54.28    3.00
  -3  -9   7   31.57    3.93
   3  -9  -7   46.62    2.47
   3  -9  -7   43.68    2.92
   3   9  -7   31.06    2.70
  -3   9   7   45.28    3.55
   4   3   6  135.40    3.22
   4   3   6  183.78    4.88
  -4   3  -6   85.00    3.36
  -4  -3  -6  121.39    3.00
   4  -3   6  120.25    3.55
   4  -3   6  132.73    3.97
  -4   3  -6  178.17    7.98
   0  -2 -10   54.77    2.98
   0   2  10   57.41    3.74
   0   2  10   54.20    2.84
   0  -2  10   55.22    3.24
   0   2  10   62.20    2.62
   0  -2  10   61.23    3.09
  -1   5  -9   -0.30    1.73
   1   5   9   -0.40    2.11
   1  -5   9    0.54    3.31
  -1  -5  -9   -0.24    1.50
   1  -5   9    0.95    2.35
   1  -5   9   -0.26    1.94
   1   5   9    0.45    1.87
   1  14   1  144.42    4.45
  -1  14  -1  114.53    3.99
  -1  14  -1  146.45    4.59
  -1 -14  -1  120.32    3.25
   1 -14   1  184.57    5.29
   1 -14   1  173.51    4.53
   1  14   1  166.74    4.31
  -1  -9   8  150.62    4.80
   1  -9  -8  139.46    4.42
  -1   9   8  163.47    4.86
   1   9  -8   90.55    4.14
  -1  -9   8  104.16    3.85
  -1   9   8  146.24    5.16
   6  -2  -2  229.10    4.61
   6   2  -2  228.40    4.27
   2  13   2    8.42    2.33
  -2  13  -2    5.72    2.99
   2 -13   2    9.16    2.09
   2  13   2    9.83    1.72
   2 -13   2   10.57    2.69
   3  -5  -9    4.72    1.79
  -3   5   9    3.63    2.49
  -3   5   9    4.17    1.19
  -3   5   9    2.32    2.49
  -3  -5   9    1.66    2.82
  -3   5   9    4.05    2.57
   3   5  -9    3.73    2.02
  -3  -5   9    3.91    1.94
   4  -5  -8   56.63    3.13
   4   5  -8   36.84    2.61
  -4   5   8   45.75    2.97
  -4  -5   8   52.74    2.33
  -4   5   8   49.85    3.25
  -4  -5   8   52.71    2.58
  -4   5   8   59.17    2.26
  -4  -5   8   30.26    3.69
   1  -7  -9    7.93    1.91
   1   7  -9    4.86    2.09
  -1   7   9    7.07    1.14
  -1  -7   9    5.87    2.16
  -1  -7   9    8.30    2.55
  -1  -7   9    5.37    3.49
  -1   7   9    6.97    2.29
  -1   7   9    7.69    2.67
   1 -12   5   47.85    4.62
   1  12   5   52.21    3.00
  -1  12  -5   19.67    2.54
  -1 -12  -5   44.67    2.65
   1 -12   5   45.13    3.37
  -1  12  -5   28.06    2.93
   1  12   5   42.22    3.33
  -5   2  -4    6.99    1.49
   5   2   4   10.63    1.25
   5  -2   4   11.34    1.65
   5  -2   4   11.49    1.89
  -5   2  -4   11.98    4.23
   1 -11   6  202.94    5.65
   1 -11   6  210.74    6.49
   1  11   6  228.57    4.71
  -1 -11  -6  234.13    5.27
   1  11   6  240.94    5.78
   6  -2  -1   32.51    2.28
  -6   2   1   15.28    3.45
   5   5   3  101.53    2.47
   5  -5   3  103.94    3.21
   5  -5   3  101.20    3.45
   4  -9   3  102.77    3.73
   4   9   3  110.54    3.48
   4  -9   3   97.70    3.38
   2  11   5  115.43    4.05
   2  11   5  114.48    3.24
  -2 -11  -5   98.78    3.65
  -2  11  -5   66.10    3.52
  -2  11  -5   82.39    4.63
   2 -11   5  105.01    5.01
   1 -14  -2    0.83    1.71
  -1 -14   2    0.68    2.46
   1 -14  -2    0.29    1.66
  -1 -14   2    0.67    2.57
   1  14  -2    0.80    2.24
  -1  14   2    0.46    1.51
  -1  14   2    1.07    2.63
   1  14  -2    0.57    1.68
  -2  -3  10    0.32    1.81
  -2  -3  10   -0.14    3.30
   2  -3 -10    0.02    1.68
  -2   3  10    1.34    2.55
  -2  -3  10    1.01    2.05
  -2   3  10    0.28    1.37
  -2   3  10    0.88    2.38
  -2   3  10   -0.39    2.10
   2   3 -10    0.45    1.92
  -5   3   7    0.46    1.69
  -5   3   7    0.26    1.15
  -5  -3   7    0.36    1.36
  -5   3   7   -0.17    2.28
  -5  -3   7    0.02    3.16
   5  -3  -7   -0.60    1.52
  -5  -3   7    0.27    1.37
   6  -2  -3   23.31    2.15
   6   2  -3   22.62    1.99
   5  -8  -3   35.40    2.40
   5  -8  -3   44.29    2.68
  -5  -8   3   41.86    1.61
   5  -8  -3   41.43    2.03
  -5   8   3   30.91    3.35
   2   6   8   31.84    2.69
  -2  -6  -8   30.32    2.16
   2  -6   8   31.25    3.20
  -2   6  -8   21.12    2.69
  -2   6  -8   25.20    4.42
   2  -6   8   28.43    4.31
   1  -8   8    9.55    3.82
  -1  -8  -8   14.93    2.01
   1   8   8   14.11    2.30
  -1   8  -8    9.02    3.31
   1  -8   8   12.90    2.91
  -6   0   0  648.61   11.77
   6   0   0  766.56    7.77
   5  -8   0   28.99    2.34
   5  -8   0   28.52    1.88
  -5   8   0   22.92    3.21
   2   0   9   -0.19    3.35
   2   0   9    1.09    2.30
  -2   0  -9    0.29    1.69
   2   0   9    0.88    1.90
   4  -8   4  217.46    5.14
   4   8   4  225.74    4.69
  -4   0   9    0.36    1.44
  -4   0   9    1.29    2.90
  -4   0   9   -0.11    1.96
   4   0  -9   -0.58    1.57
   2 -12   4  113.87    4.85
   2  12   4  110.96    3.99
  -2 -12  -4   95.44    3.86
   2 -12   4  115.46    4.22
  -2  12  -4   95.78    4.45
   0  -9  -8   60.98    3.18
   0   9   8   55.72    3.56
   0   9   8   59.43    3.16
  -6   1   0    0.70    3.01
   6  -1   0    2.12    1.66
  -6  -1   0    0.69    3.97
   6  -1   0    2.18    1.26
   0   3  10   25.78    2.64
   0  -3 -10   25.08    2.41
   0   3  10   24.45    2.70
   0  -3  10   16.39    3.48
   0  -3  10   21.90    2.58
   0  -3  10   21.57    2.46
   0   3  10   22.28    1.86
  -1   4  10    0.42    2.06
   1   4 -10    0.23    1.85
  -1   4  10    0.28    1.25
  -1  -4  10    0.08    3.18
  -1  -4  10    0.08    2.18
  -1  -4  10   -0.55    2.27
   2  -1   9   18.13    3.90
   2   1   9   22.50    2.70
  -2  -1  -9   18.30    2.22
   2  -1   9   16.74    2.78
   2  -1   9   18.70    2.41
   2   1   9   18.57    3.50
  -2   1  -9   18.17    2.37
  -6   0   4   -0.16    2.38
   6   0  -4    0.57    1.61
  -6   3   2    4.39    2.99
   6  -3  -2    5.74    1.76
  -4  -1   9   72.32    4.35
   4   1  -9   83.52    3.39
  -4  -1   9   91.90    3.72
  -4   1   9   85.13    4.55
  -4   1   9   76.34    3.36
  -4   1   9  101.35    2.97
  -4  -1   9  114.52    3.52
   4  -1  -9   97.97    3.91
   4 -11  -1   16.86    2.15
  -4  11   1   14.52    1.90
   4 -11  -1   19.75    1.71
   2 -10   6   15.07    3.99
  -2  10  -6   11.58    3.31
  -2  10  -6    9.87    2.07
   2  10   6   19.31    2.45
   2  10   6   19.09    2.04
  -2 -10  -6    5.77    1.99
   2 -10   6   17.57    2.80
  -4  10  -2    0.32    2.78
   4 -10   2    0.94    1.83
   4  10   2    1.25    1.89
  -4  10  -2    0.50    1.59
   4 -10   2    1.15    1.60
   6  -1  -4   27.67    2.24
  -6   1   4   19.73    2.84
  -3   0  -8    0.43    1.55
   3   0   8    1.52    2.66
   3   0   8   -0.03    2.20
   3   8   6   26.62    2.60
  -3   8  -6   13.93    2.24
   3   8   6   24.55    2.12
  -3   8  -6   17.44    3.49
   3  -8   6   22.60    2.60
   3  -8   6   24.86    2.73
  -3  -8  -6   30.09    2.09
   4 -11  -2    5.98    1.80
   4 -11  -2    8.08    2.04
  -4 -11   2    5.37    2.73
   4 -11  -2    7.05    1.28
  -4  11   2    6.91    3.02
  -5   3  -4   98.82    5.73
   5  -3   4   97.40    3.38
   5   3   4   92.59    2.53
   5  -3   4   98.77    3.18
   0   7  -9    7.40    2.37
   0   7   9   11.73    2.43
   0   7   9   14.33    2.50
   0  -7  -9   11.63    2.00
   0  -7   9   12.28    3.73
   0  -7   9   13.46    2.71
   0  -7   9   10.25    2.60
   4   4   6   25.60    2.39
   4  -4   6   22.64    2.54
   4  -4   6   22.43    2.19
  -4   4  -6   25.85    4.84
   3  12   2  142.88    4.08
  -3  12  -2   95.89    3.79
   3 -12   2  141.63    4.44
  -3  12  -2  108.06    4.73
   3 -12   2  135.97    3.80
  -2   7   9   79.13    3.96
  -2   7   9   77.38    3.97
   2   7  -9   52.99    3.28
  -2  -7   9   66.38    3.23
  -2   7   9   75.07    2.18
  -2  -7   9   50.07    4.26
   2  -7  -9   89.16    3.67
   6  -3  -1  431.07    5.64
  -6   3   1  401.87    8.39
   1 -13   4   67.36    3.66
   1  13   4   59.92    2.58
   1 -13   4   65.43    4.66
  -1 -13  -4   66.13    3.24
   1  13   4   62.60    3.61
  -5  -7   5    2.90    1.33
  -5   7   5    4.42    2.92
   5  -7  -5    3.91    1.81
   5  -7  -5    3.35    1.61
  -5   7   5    2.83    1.85
  -5  -7   5    0.58    3.28
  -2   9   8    4.00    2.20
  -2  -9   8    2.47    3.09
   2   9  -8    3.28    2.02
  -2   9   8    4.33    1.10
  -2  -9   8    5.97    2.34
   2  -9  -8    4.05    1.83
  -2  -9   8    2.96    1.75
  -2   9   8    4.06    2.63
  -1  14  -2   33.66    3.29
   1  14   2   28.44    3.04
  -1  14  -2   28.06    2.59
   1 -14   2   45.86    4.03
   1 -14   2   42.18    2.95
  -3  -1  -8    3.49    1.61
  -3   1  -8    1.05    1.71
   3  -1   8    4.16    2.81
   3   1   8    4.88    2.81
   3  -1   8    3.98    2.30
   3  -1   8    2.62    2.04
   3   1   8    5.58    2.56
   6  -2   0   71.72    2.63
   6  -2   0   74.49    2.92
  -6   3   3    0.24    2.80
   6   3  -3    0.32    1.33
   6  -3  -3    0.15    1.64
   2  -2   9  214.82    5.08
   2  -2   9  185.85    5.96
   2   2   9  221.20    5.14
  -2  -2  -9  184.46    4.64
  -3  12   4  105.01    3.60
  -3 -12   4  101.09    4.39
   3 -12  -4  114.62    4.13
   3 -12  -4  120.21    2.57
  -3 -12   4  118.98    3.42
  -1 -10  -7   61.60    3.03
   1  10   7   60.26    3.57
   1  10   7   57.35    2.83
   1 -10   7   56.77    4.03
  -4   2   9    2.47    1.36
  -4  -2   9    0.57    2.98
  -4  -2   9    0.92    1.96
   4  -2  -9    1.31    1.60
  -4   2   9    2.01    3.01
  -4   2   9    2.14    2.08
   4   2  -9    1.31    1.66
  -3   6  -7   99.05    5.26
   3   6   7  146.18    4.35
   3   6   7  134.78    4.21
   3  -6   7  109.48    4.21
   3  -6   7  115.85    4.20
  -3  -6  -7  134.13    3.57
   4 -11   0   89.78    2.91
  -4  11   0   53.74    2.92
   3   8  -8   -0.42    1.93
  -3   8   8    1.43    2.57
   3  -8  -8    1.26    1.67
  -3  -8   8    1.92    2.13
  -3   8   8    2.30    1.17
   0 -14   3    0.84    2.48
   0 -14  -3    0.78    1.68
   0  14  -3    0.77    2.46
   0 -14  -3    0.91    1.58
   0  14   3    1.53    1.47
   0  14  -3    0.43    1.86
   0  14   3    0.48    2.51
   0 -14   3    0.44    3.03
  -6  -2   4   50.65    2.01
   6  -2  -4   65.57    3.15
  -2 -13   4  140.25    5.29
  -2 -13   4  123.41    3.91
  -2  13   4  124.82    4.90
   2 -13  -4  109.37    3.67
   2 -13  -4  152.43    4.64
  -2  13   4  112.96    3.49
  -1 -12   6   98.33    4.23
   1 -12  -6  100.88    4.16
  -1  12   6   88.15    3.26
  -1 -12   6   83.06    4.93
   1 -12  -6   93.88    2.79
   2  -4 -10    6.03    2.03
  -2  -4  10    8.34    2.21
  -2   4  10    6.76    2.43
  -2   4  10    7.85    1.50
  -2   4  10    7.01    2.29
  -2  -4  10    4.38    3.31
   2   4 -10    5.58    2.24
  -2  -4  10    7.32    2.13
  -5  -4   7  132.44    6.09
  -5   4   7  220.09    5.15
  -5  -4   7  207.75    4.06
   5  -4  -7  182.18    4.53
  -5   4   7  149.00    4.08
  -5   4   7  201.84    3.64
  -3   0  10    1.13    2.89
  -3   0  10   -0.18    1.51
   3   0 -10    0.15    1.71
  -3   0  10   -0.40    2.09
  -5   7  -2    7.04    3.45
   5   7   2   10.58    1.80
   5  -7   2    9.09    2.00
  -5  -6   6    6.33    3.43
  -5   6   6    6.88    2.88
  -5   6   6    6.98    2.09
  -5  -6   6    8.25    1.55
   5  -6  -6    8.52    1.81
   5  -6  -6    8.38    1.87
   4  -9  -6   82.23    3.53
  -4  -9   6   80.78    3.00
  -4   9   6   81.69    4.31
   4  -9  -6   78.65    3.25
  -3  -2  -8    0.15    1.38
   3  -2   8   -0.50    2.81
   3   2   8   -0.12    2.03
  -3   2  -8    0.23    1.61
   3  -2   8    1.17    2.29
  -5   8   4   14.51    3.12
   5  -8  -4   16.64    2.08
  -5  -8   4    9.81    3.12
   5  -8  -4   14.60    1.99
  -5  -8   4   18.18    1.50
  -3   1  10    8.36    3.00
  -3  -1  10    8.67    2.24
   3   1 -10    6.95    1.84
  -3   1  10    6.86    2.16
  -3   1  10   10.13    1.74
   3  -1 -10    9.65    1.99
  -3   1  10    8.20    2.26
  -3  -1  10    5.36    2.95
  -3  -1  10   10.08    1.91
   1 -14  -3  113.20    4.24
  -1  14   3  104.66    4.64
   1 -14  -3  101.31    3.55
  -1  14   3  102.82    3.18
   1  -6   9  103.37    3.98
   1  -6   9  121.83    5.39
   1   6   9  165.56    4.62
  -1   6  -9  104.60    4.52
   1   6   9  155.75    4.56
  -1  -6  -9  146.17    4.29
   1  -6   9  146.97    4.74
   1  11  -7   42.51    3.34
  -1  11   7   60.63    3.91
  -1 -11   7   73.53    3.97
   1 -11  -7   66.52    3.49
  -1  11   7   63.36    3.19
   1 -11  -7   49.44    2.40
  -1 -11   7   52.82    4.60
   0 -12  -6   67.27    3.55
   0 -12   6   55.73    4.50
   0  12   6   59.37    3.81
   0  12   6   54.48    2.95
   0 -12   6   66.75    4.16
  -3   6   9   49.69    3.55
   3   6  -9   35.35    2.77
  -3  -6   9   40.16    2.64
  -3   6   9   51.31    1.99
  -3  -6   9   56.18    3.05
   3  -6  -9   59.55    3.09
  -3  -6   9   36.18    4.11
  -3   6   9   47.88    3.51
  -4  -6   8   98.36    3.49
  -4   6   8   82.52    4.02
   4  -6  -8   78.04    3.52
  -4   6   8   90.55    2.49
  -4   6   8   87.44    3.85
   4 -11  -3  125.00    4.12
   4 -11  -3  141.72    4.10
  -4  11   3  126.60    5.10
   4 -11  -3  136.04    2.97
  -4 -11   3  111.88    4.75
  -4 -11   3  151.41    2.97
   0  -4  10   26.00    2.88
   0  -4 -10   28.73    2.53
   0   4  10   24.99    1.73
   0  -4  10   29.04    2.76
   0  -4  10   18.95    3.70
   0   4  10   34.80    3.07
   0   4  10   32.77    2.86
   5  -8   1  134.02    4.07
   5  -8   1  125.21    3.33
  -6   4   2   17.40    1.73
  -6   4   2   17.42    3.51
  -4 -10   5    2.63    3.11
   4 -10  -5    5.08    1.75
   4 -10  -5    6.09    1.21
  -4  10   5    3.23    2.08
  -4  10   5    6.20    2.95
  -4 -10   5    5.41    1.67
   4 -10  -5    5.68    1.78
   4  -7   5   30.55    2.71
   4  -7   5   27.17    2.30
   4   7   5   34.23    2.65
   6  -3   0    6.53    1.44
  -6   3   0    5.11    3.29
   6  -3   0    6.15    1.82
   2 -13   3   22.28    3.57
   2 -13   3   25.41    2.88
   2  13   3   19.67    2.71
  -2 -13  -3   22.78    2.25
  -2  13  -3   16.21    3.03
   2  -3   9  310.49    6.00
  -2  -3  -9  314.73    5.96
   5  -6   3  175.60    4.21
   5  -6   3  162.18    4.28
   6   0   1    0.26    1.21
  -6   0  -1   -0.15    4.19
  -4  -3   9   51.59    4.19
  -4  -3   9   75.10    3.40
  -4   3   9   59.49    3.32
   4   3  -9   51.26    2.92
  -4   3   9   60.16    3.96
  -4   3   9   64.38    3.21
   4  -3  -9   56.09    3.04
  -4   3   9   68.19    2.41
   5   4   4    2.15    1.02
   5  -4   4    2.00    1.81
  -5   4  -4   -0.24    1.47
   5   4   4    1.27    1.56
   5  -4   4    2.09    1.48
  -1 -13   5  182.80    6.13
   1 -13  -5  187.56    5.23
   1 -13  -5  168.74    3.97
  -1  13   5  180.25    4.22
  -1  13   5  176.56    5.49
  -2 -14   1    5.98    2.38
   2 -14  -1    5.67    1.97
   2  14  -1    3.62    1.75
   2 -14  -1    6.31    1.92
  -2  14   1    4.31    2.79
  -2  14   1    4.30    1.83
   3  -2 -10    2.09    1.77
  -3   2  10    1.70    2.64
   3   2 -10    1.52    1.77
  -3  -2  10    1.34    2.84
  -3  -2  10    1.67    1.99
  -3   2  10    1.83    2.24
  -3   2  10    0.44    2.12
  -3  -2  10    2.19    1.76
  -3   2  10    1.70    1.41
  -1   5  10    1.74    2.40
  -1  -5  10    1.26    3.38
  -1   5  10    0.61    1.23
  -1   5  10    1.34    2.42
  -1  -5  10    1.00    2.15
   1   5 -10    0.37    1.94
  -1  -5  10    1.72    2.31
   6  -4  -1   41.34    2.90
   6  -4  -1   33.23    2.09
  -6  -3   4  136.56    2.99
   6  -3  -4  149.47    4.14
   2  14   0  432.46    6.46
   2  14   0  365.85    6.27
   2 -14   0  457.01    6.90
   2 -14   0  485.86    6.63
  -2  14   0  371.52    7.11
  -2  14   0  284.08    5.88
   0  13   5   13.04    2.95
   0 -13  -5   12.73    2.10
   0  13   5   12.29    2.03
   0 -13   5   18.28    3.25
   0  13  -5    7.56    2.15
   0 -13   5   16.24    3.62
   6   1   1  247.00    4.34
   6  -1   1  240.99    4.61
   6  -1   1  241.24    4.27
  -3  13   1   74.12    4.35
  -3 -13   1   68.37    3.52
   3 -13  -1   74.77    2.64
   3 -13  -1   72.70    3.30
  -4  -8   7  100.22    3.44
  -4  -8   7   61.53    4.38
  -4   8   7  106.40    4.35
   4  -8  -7   91.65    3.36
   4  -8  -7  110.23    4.24
  -4   8   7   70.00    3.30
   0  11   7   17.60    2.50
   0 -11   7   14.26    3.72
   0 -11  -7   20.20    2.46
   0  11  -7    8.75    2.34
   0 -11   7   19.37    3.15
   1   0  10   -0.11    1.89
   1   0  10   -0.44    3.01
  -1   0 -10    0.02    1.86
   6  -4  -3   53.49    2.79
  -6   4   3 1732.00   17.03
  -3   3  -8   -0.48    1.67
  -3  -3  -8    0.43    1.44
   3   3   8    0.23    2.15
   3  -3   8    0.85    2.99
   3  -3   8    0.57    2.49
  -6   0   5    0.60    1.22
   1  -1  10    7.65    3.23
   1   1  10   11.37    2.50
  -1   1 -10    6.08    2.14
   1  -1  10    8.82    2.18
   1   1  10    9.40    1.99
  -1  -1 -10    8.78    1.94
   1   1  10    8.57    3.16
   2  -9   7  157.91    5.06
  -2   9  -7   92.38    4.54
  -2   9  -7  113.16    5.24
   2  -9   7  162.68    6.10
   2   9   7  202.43    4.93
   2   9   7  184.44    5.10
   3 -11   4  128.45    4.42
   3  11   4  126.13    3.88
  -3 -11  -4  115.66    3.63
   3 -11   4  121.64    4.11
   4  -5   6   15.73    2.05
   4  -5   6   15.91    2.53
  -4   5  -6   12.69    3.95
   4   5   6   17.96    2.30
  -4  11  -1   37.46    3.86
   4 -11   1   45.96    2.52
  -1  -8   9   30.72    4.28
  -1   8   9   42.83    3.40
   1  -8  -9   50.53    3.17
  -1   8   9   48.82    3.17
   1   8  -9   34.63    3.08
  -1  -8   9   37.62    2.94
   5  -9  -2  130.10    3.99
   5  -9  -2  117.00    2.97
  -3  13   0   13.13    1.99
  -3  13   0   13.04    3.37
   3 -13   0   15.90    2.27
   3 -13   0   17.01    1.89
   2   7   8   51.37    3.30
  -2  -7  -8   49.03    2.69
  -2   7  -8   26.55    2.90
   2   7   8   44.51    2.91
   2  -7   8   50.95    3.89
   2  -7   8   45.03    4.65
  -2   7  -8   32.45    4.40
  -6  -1   5    0.23    1.22
  -5   9   1    5.36    3.20
   5  -9  -1    9.29    1.50
   5  -9  -1    8.46    2.01
   3 -13  -2    9.54    2.05
  -3  13   2   10.46    3.36
  -3 -13   2    7.84    2.61
   3 -13  -2   11.94    1.61
   3 -13  -2    9.27    2.02
   3 -10   5    1.99    2.19
  -3  10  -5    0.84    3.41
  -3 -10  -5    0.57    1.43
   3  10   5    1.54    2.34
   3 -10   5    1.52    1.93
  -3  10  -5    0.19    1.93
   2 -14  -2  122.29    4.13
   2 -14  -2  135.40    4.66
   2 -14  -2  143.19    3.28
  -2  14   2  143.12    5.15
  -2 -14   2  122.98    3.58
  -2 -14   2  150.45    4.55
  -5   0   8    0.04    1.63
  -5   0   8   -0.14    2.88
   5   0  -8    0.48    1.50
   6  -2   1    0.65    1.66
  -6   2  -1    1.06    3.63
   6  -2   1    0.87    1.37
   6   2   1    0.99    1.14
  -3  11   6   34.34    2.64
   3 -11  -6   40.02    2.93
  -3 -11   6   30.93    3.63
   3 -11  -6   39.71    2.39
  -3 -11   6   41.82    2.81
  -3  11   6   37.85    3.56
   3 -11  -6   36.45    1.54
  -5  -1   8   39.96    2.19
  -5  -1   8   16.93    2.21
  -5   1   8   26.46    3.51
   5  -1  -8   33.58    2.42
  -5  -1   8   26.85    3.95
   1  -2  10   26.37    2.78
   1  -2  10   23.70    3.67
   1   2  10   25.76    2.51
   1  -2  10   27.93    3.01
  -1  -2 -10   23.67    2.30
  -1   2 -10   21.94    2.76
   2  -5 -10   12.78    2.17
   2   5 -10    9.82    2.27
  -2  -5  10   17.55    2.54
  -2   5  10   15.24    1.55
  -2  -5  10    9.91    3.53
  -2   5  10   15.33    2.79
  -2  -5  10   10.70    2.11
  -2   5  10   11.92    2.60
  -5   5   7    6.50    2.68
  -5   5   7    7.22    2.05
   5  -5  -7    9.15    1.96
  -5  -5   7    9.06    1.62
  -5   5   7    9.30    1.51
  -3  -3  10  126.54    3.88
  -3  -3  10   67.28    4.40
   3  -3 -10  104.46    3.91
  -3   3  10   86.78    4.09
   3   3 -10   92.29    3.98
  -3  -3  10   88.28    3.47
  -3   3  10  116.23    3.13
  -3   3  10  100.50    3.85
  -3   3  10   90.30    4.40
   1 -14   3   27.83    3.74
   1 -14   3   29.61    2.93
  -1 -14  -3   27.17    2.56
  -1  14  -3   17.15    2.43
  -1  14  -3   20.24    3.23
   1  14   3   21.50    3.03
  -3  10   7   23.20    2.54
   3 -10  -7   29.68    2.41
  -3  10   7   26.49    3.25
   3  10  -7   16.75    2.46
  -3 -10   7   26.55    2.56
   3 -10  -7   27.72    2.58
  -3 -10   7   17.95    3.72
   2  14   1   67.44    3.65
   2 -14   1   74.20    3.47
   2  14   1   69.74    3.00
   2 -14   1   79.33    3.73
  -2  14  -1   65.74    4.11
  -1 -10   8   -0.56    3.43
  -1  10   8    0.32    2.19
   1  10  -8   -0.18    1.95
  -1 -10   8    0.40    2.60
  -1 -10   8    0.19    2.15
  -1  10   8    0.62    2.83
   1 -10  -8    0.65    1.70
  -2 -12   6  148.43    4.63
   2 -12  -6  155.27    4.94
  -2  12   6  132.01    4.83
  -2 -12   6  111.99    5.05
  -2  12   6  121.95    3.74
   6  -2  -5   29.29    2.37
  -6   2   5   23.24    2.99
  -6  -2   5   26.61    1.67
   6  -4   0    2.09    1.84
   6  -4   0    2.04    1.33
  -6   4   0    1.29    3.33
  -2  11   7  168.25    4.53
  -2  11   7  175.03    5.61
  -2 -11   7  125.95    5.56
   2  11  -7  101.09    4.26
  -2 -11   7  209.66    5.45
   2 -11  -7  192.07    5.29
  -5   9   3   50.22    4.18
  -5  -9   3   60.92    1.83
   5  -9  -3   54.72    2.93
   5  -9  -3   54.16    2.22
   5  -9  -3   45.65    2.71
   2   4   9   41.16    2.87
   2  -4   9   39.89    3.21
   2  -4   9   38.45    4.43
   2  -4   9   35.22    2.87
  -2   4  -9   28.87    2.72
  -2  -4  -9   41.57    2.68
   0  15   0    1.00    2.56
   0 -15   0    0.97    2.04
   0  15   0   -0.13    1.73
   4 -11  -4    3.56    1.17
  -4 -11   4    1.32    1.51
   4 -11  -4    3.17    1.76
  -4  11   4    2.48    3.09
   4 -11  -4    3.44    1.79
  -4  11   4    2.87    1.93
  -4 -11   4    2.35    2.92
  -4   4   9   28.46    1.75
  -4  -4   9   28.50    2.63
   4  -4  -9   27.97    2.50
   4   4  -9   21.38    2.37
  -4  -4   9   30.96    2.42
  -4   4   9   23.43    3.09
  -4   4   9   20.41    2.58
  -4  -4   9   20.76    3.61
  -4   4   9   27.76    2.80
   1  -9   8   54.67    3.87
   1   9   8   60.47    3.17
   1  -9   8   53.06    4.70
  -1  -9  -8   60.82    3.14
   3 -12   3    9.21    1.99
   3  12   3    9.46    2.45
  -3  12  -3    4.73    2.04
  -3  12  -3    6.32    3.16
   5  -9   0  160.44    3.65
   5  -9   0  180.75    4.69
   0   5  10    0.94    2.42
   0  -5  10   -0.61    2.37
   0  -5  10    0.25    3.31
   0   5  10    1.14    2.73
   0  -5  10    2.12    2.58
   0  -5 -10    1.07    1.73
  -6   4   4  119.07    4.81
  -6  -4   4  128.00    2.73
   6  -4  -4  134.94    3.92
   4 -10   3   31.22    2.76
  -4  10  -3   16.09    2.07
   4  10   3   35.95    2.79
   4 -10   3   25.65    2.24
  -4  10  -3   24.60    3.98
   5  -2  -8    0.30    1.63
  -5   2   8   -0.08    1.75
  -5  -2   8   -0.09    1.43
  -5  -2   8    0.31    3.29
  -5   2   8    0.51    1.27
  -5  -2   8    0.24    1.57
  -6   5   2    1.64    1.32
   6  -5  -2    1.42    1.77
  -6   5   2   -0.13    3.33
  -4   9  -4    0.19    1.71
   4   9   4    3.85    2.05
   4  -9   4    3.82    2.11
  -4   9  -4    3.58    3.52
  -3  -7  -7    9.03    1.62
   3  -7   7    8.94    2.55
   3   7   7    9.72    2.29
  -3   7  -7    4.07    2.03
   3  -7   7    7.76    2.83
  -3   7  -7    8.75    3.82
   3   7   7   11.20    2.35
   0  -8   9    4.57    2.67
   0  -8   9    4.25    3.67
   0   8   9    5.96    2.65
   0  -8  -9    5.63    1.88
   0   8  -9    3.49    2.25
   0  -8   9    2.31    1.94
   0   8   9    5.32    2.15
  -2  -8   9    6.53    3.40
  -2   8   9    5.98    2.82
  -2  -8   9    5.41    2.03
  -2  -8   9    8.18    2.62
   2   8  -9    3.69    2.10
  -2   8   9   10.13    2.58
  -2   8   9    7.86    1.20
   2  -8  -9    9.24    2.07
   4   0   7   -0.30    1.60
  -4   0  -7   -0.96    1.48
   3  13   1   24.05    2.70
   3 -13   1   24.27    2.52
  -3  13  -1   18.11    3.53
   3 -13   1   25.07    2.11
   0 -15  -1   40.53    2.64
   0  15  -1   32.49    2.70
   0 -15   1   45.97    2.99
   0  15   1   35.61    2.73
   0  15   1   42.70    3.24
   0  15  -1   41.08    3.30
   5   0   5  497.21    6.37
   5  -8  -5  324.42    6.03
  -5   8   5  246.56    5.35
  -5   8   5  365.87    7.46
  -5  -8   5  226.54    7.19
  -5  -8   5  366.16    4.84
  -3 -12   5   55.12    3.98
  -3  12   5   62.50    3.00
   3 -12  -5   68.37    3.34
  -3  12   5   82.39    4.66
  -3 -12   5   79.30    3.28
   3  12  -5   45.43    3.20
   3 -12  -5   74.39    3.04
   6  -3   1   61.04    2.91
   6   3   1   52.16    2.09
   6  -3   1   58.52    2.40
  -6   3  -1   48.04    4.19
  -3   4  -8    7.62    2.01
   3  -4   8   12.57    2.89
   3  -4   8   11.85    3.23
  -3   4  -8   14.19    4.84
   3   4   8   13.94    2.22
  -3  -4  -8   11.81    1.76
  -5   5  -4    0.84    1.81
   5  -5   4    6.81    2.02
   5  -5   4    6.52    1.68
  -3 -13   3    6.32    2.72
  -3 -13   3    6.49    1.73
   3 -13  -3    9.26    1.47
   3 -13  -3    5.95    1.90
   3 -13  -3    7.45    1.86
  -5  -7   6    1.32    3.33
   5  -7  -6    2.10    1.71
  -5  -7   6    2.57    1.54
  -5   7   6    3.75    2.90
  -5   7   6    2.10    2.05
   6  -5  -1   16.53    2.18
  -6   5   1   13.67    3.57
  -4  -1  -7  348.09    5.64
   4  -1   7  455.86    6.41
   4   1   7  460.32    6.19
   4   1   7  464.73    7.00
  -4   1  -7  310.38    5.78
   5  -1   5   61.46    2.70
   5   1   5   63.08    2.48
   0  14  -4   49.17    3.25
   0 -14   4  106.06    4.42
   0  14   4   88.67    4.18
   0  14  -4   77.66    4.08
   0 -14  -4   95.84    3.92
   0  14   4   77.35    2.99
   0 -14   4  114.55    5.19
   1   3  10   86.66    4.27
   1   3  10   68.03    3.54
   1  -3  10   72.60    3.89
  -1  -3 -10   58.99    3.18
   1  -3  10   63.57    3.44
   1  -3  10   47.00    4.24
  -1   3 -10   42.54    3.11
  -3  -9  -6  102.76    3.57
   3   9   6  122.33    3.64
   3  -9   6   92.75    4.25
  -3   9  -6   83.07    5.01
   3   9   6  111.20    4.02
   3  -9   6  101.61    4.12
   0  10   8   15.04    2.32
   0 -10  -8   14.92    2.12
  -6   5   3    9.52    3.37
   6  -5  -3   12.49    2.01
  -1  14   4   13.27    2.97
   1 -14  -4   11.85    1.96
   1 -14  -4   14.75    2.21
  -1  14   4   12.49    1.97
   1  14  -4    6.39    2.21
  -1 -14   4   15.63    2.86
  -1 -14   4   17.42    3.47
   1   7   9  208.35    5.74
   1   7   9  181.95    5.20
  -1   7  -9   91.06    4.34
   1  -7   9  144.41    5.82
  -1   7  -9  137.65    7.24
   1  -7   9  157.24    5.12
  -1  -7  -9  160.38    4.59
   3  -7  -9   36.74    2.74
  -3   7   9   30.07    2.83
   3   7  -9   21.41    2.56
  -3  -7   9   39.68    2.90
  -3  -7   9   23.49    4.21
  -3   7   9   33.36    3.25
  -3   7   9   33.15    1.74
  -4  -7   8   20.10    2.23
   4  -7  -8   17.17    2.19
  -4   7   8   21.68    1.65
  -4   7   8   14.86    2.36
  -4   7   8   19.11    3.04
  -6   3   5   63.39    3.82
   6  -3  -5   69.03    3.09
  -6  -3   5   65.19    2.24
   2 -14  -3   32.78    2.82
  -2  14   3   32.38    2.24
  -2 -14   3   40.23    3.48
  -2 -14   3   33.36    2.67
   2 -14  -3   31.52    2.57
   2 -13  -5   37.72    2.84
  -2 -13   5   37.14    2.92
  -2 -13   5   36.61    3.90
  -2  13   5   31.15    2.45
   2 -13  -5   28.74    2.35
   5   8   2   23.21    2.21
   5  -8   2   22.87    2.41
   1 -12   6   65.95    4.68
  -1  12  -6   55.88    4.25
   1 -12   6   85.04    4.33
   1  12   6   89.97    3.47
  -1  12  -6   40.69    3.20
   1  12   6   83.43    4.00
  -1 -12  -6   53.05    3.61
  -1  -6  10   35.20    3.03
  -1  -6  10   30.16    2.67
   1   6 -10   26.59    3.09
  -1   6  10   34.94    3.11
  -1  -6  10   23.79    4.00
  -1   6  10   36.09    3.01
   1  -6 -10   33.96    2.66
  -2 -12  -5    2.85    1.77
  -2  12  -5    6.30    3.38
   2  12   5    9.92    2.62
  -2  12  -5    4.82    2.06
   2 -12   5   10.99    4.07
   3   4 -10   33.48    2.91
  -3   4  10   45.93    3.26
  -3  -4  10   55.42    3.15
  -3   4  10   35.15    3.59
  -3   4  10   49.78    2.23
  -3  -4  10   35.23    2.79
   3  -4 -10   46.38    3.01
  -3   4  10   41.99    3.46
  -3  -4  10   29.41    3.83
   1 -15   0  143.96    4.15
   1 -15   0  177.70    4.82
   1  15   0  135.96    4.44
   1  15   0  110.40    3.90
  -1  15   0  128.19    4.75
  -1  15   0   88.85    3.71
   4  -2   7  138.04    4.17
   4  -2   7  138.97    3.95
  -4  -2  -7  110.69    3.24
   4   2   7  188.87    5.31
  -4   2  -7   76.18    3.27
  -3   9   8    1.15    2.08
  -3  -9   8    1.19    2.20
   3  -9  -8    1.70    1.87
  -3   9   8    2.02    2.73
   3   9  -8    0.66    1.97
  -3  -9   8    0.94    3.56
   5  -2   5   33.44    2.26
   5  -2   5   36.51    2.75
   5   2   5   34.31    2.02
   5  -7   3    7.52    2.10
   5  -7   3    8.81    1.76
   5   7   3    8.94    1.95
  -2  10   8   -0.04    2.08
  -2  10   8    1.31    2.87
   2  10  -8   -0.43    2.07
  -2 -10   8    0.44    2.36
   2 -10  -8   -0.36    1.90
  -2 -10   8    0.30    3.18
   2 -10  -8   -0.04    1.49
  -5  -3   8   42.85    2.34
  -5   3   8   48.10    2.27
   1  13   5   12.19    2.88
   1 -13   5   11.87    2.91
  -1 -13  -5    4.76    1.99
   1  13   5   11.38    1.97
  -1  13  -5    8.07    2.88
   1 -13   5   11.38    3.60
  -1  13  -5    6.01    2.25
  -1 -15   1   28.09    3.10
  -1  15   1   27.52    2.48
   1  15  -1   21.30    2.49
  -1  15   1   34.43    3.50
   1 -15  -1   34.22    2.57
   1  15  -1   35.02    3.08
  -4   6  -6   17.70    4.29
   4   6   6   25.66    2.32
   4  -6   6   20.19    2.19
   4  -6   6   22.76    2.74
  -2  11  -6    3.01    1.99
   2 -11   6    6.14    2.65
   2  11   6    7.04    2.50
  -2  11  -6    5.38    3.32
  -2 -11  -6    2.23    1.81
   2  11   6    7.34    1.91
   2 -11   6    7.94    4.17
   4 -11   2   11.29    2.20
   4 -11   2   11.98    1.92
   4  11   2   13.67    2.18
  -6   0  -2  113.94    6.68
   6   0   2   93.11    2.75
   2  14   2   97.00    3.98
   2 -14   2  109.86    4.55
   2 -14   2   99.99    3.91
   5  -9  -4  466.34    5.73
   5  -9  -4  471.87    7.43
  -4   8  -5    2.70    3.62
   4  -8   5    3.53    2.17
   4   8   5    3.99    2.08
   4  -8   5    2.78    1.84
  -4   8  -5    0.09    1.71
  -6   1  -2    7.38    4.36
   6   1   2    7.31    1.35
   6  -1   2    6.92    1.50
   0 -15   2    3.52    2.91
   0  15  -2    2.46    2.62
   0  15   2    3.36    1.72
   0  15  -2    1.47    1.88
   0 -15  -2    3.53    1.83
   0  15   2    3.21    2.64
   0 -15   2    3.40    2.31
   4 -12  -1   31.87    2.66
   4 -12  -1   35.46    2.11
  -6   5   0    8.34    3.41
   6  -5   0   11.63    2.09
   6  -5   0   10.97    1.57
  -2   5  -9  119.36    4.51
   2  -5   9  198.99    5.38
   2  -5   9  164.50    6.24
   2   5   9  221.90    5.58
   2   5   9  256.65    6.09
  -2  -5  -9  197.91    4.72
   1 -15   1   39.06    3.43
   1  15   1   33.32    3.02
   1  15   1   31.53    2.56
  -1  15  -1   22.26    2.50
   1 -15   1   41.23    3.34
  -1  15  -1   30.37    3.25
   1 -11   7  120.81    5.60
  -1  11  -7  105.36    4.81
   1  11   7  153.66    4.21
  -1  11  -7   89.76    4.28
   1  11   7  158.41    5.03
  -1 -11  -7  162.98    4.69
   5  -9   1   53.81    2.57
   5  -9   1   53.87    3.03
   6  -4   1   44.55    2.73
   6  -4   1   44.18    2.23
  -4  10   6    0.60    1.93
  -4 -10   6    0.10    3.04
  -4 -10   6    0.60    1.80
   4 -10  -6    1.78    1.81
   4 -10  -6    0.55    1.73
  -4  10   6   -0.18    3.05
  -4  -5   9   73.38    4.74
  -4  -5   9  110.62    3.52
  -4   5   9  108.31    2.91
   4   5  -9   81.23    3.80
   4  -5  -9  116.67    4.31
  -4   5   9   82.70    3.70
  -4   5   9  107.12    4.07
  -2   6  10   42.47    1.96
  -2   6  10   40.83    3.34
  -2  -6  10   42.96    3.03
   2   6 -10   34.68    3.28
   2  -6 -10   47.66    3.07
   4 -12  -2  103.80    2.94
   4 -12  -2   95.69    3.68
   5  -6  -7  248.73    5.61
  -5  -6   7  149.49    6.33
  -5   6   7  187.73    4.71
  -5  -6   7  249.65    4.58
   2 -13   4   52.07    4.56
   2 -13   4   51.99    3.56
  -2 -13  -4   33.51    2.99
  -2  13  -4   34.24    3.58
   2  13   4   55.29    3.53
  -1   0  11  394.32    7.67
  -1   0  11  414.47    6.52
  -6   0   6  485.50    5.61
  -6  -5   4    2.92    1.16
   6  -5  -4    2.75    1.78
  -6   5   4    2.28    2.56
   1  -4  10  192.87    5.45
   1  -4  10  201.42    5.14
   1   4  10  227.69    5.47
   1  -4  10  177.40    6.33
   1   4  10  210.19    5.09
  -1  -4 -10  201.19    5.30
  -1  -1  11   17.21    2.32
  -1  -1  11   15.64    2.64
  -1   1  11   21.54    2.24
  -1  -1  11   12.50    3.25
  -1  -1  11   18.48    2.30
   1   1 -11   22.81    2.73
  -1   1  11   20.65    2.75
  -1   1  11   17.95    3.55
  -1   1  11   19.56    2.97
  -6   1   6   41.45    2.11
  -6  -1   6   39.25    2.00
  -4   3  -7  345.30   10.43
   4   3   7  329.06    6.13
   4  -3   7  290.20    5.72
   4  -3   7  284.36    5.41
   6  -2   2   59.09    2.42
   6   2   2   62.29    2.35
  -6   2  -2   60.51    5.15
   6  -2   2   65.01    3.00
   5  -3   5    2.65    1.69
   5   3   5    3.18    1.88
   5  -3   5    3.37    2.00
   2   8   8  191.57    4.91
   2  -8   8  182.15    5.70
  -2  -8  -8  191.29    4.62
  -1  15   2  327.49    6.77
   1 -15  -2  335.50    5.51
  -4  -9   7  144.50    4.21
  -4   9   7  146.91    5.14
   4  -9  -7  135.61    4.08
   4  -9  -7  134.45    4.43
  -3  -5  -8  143.34    3.81
   3  -5   8  135.32    5.18
   3   5   8  150.10    4.42
  -3   5  -8  136.35    7.37
   3  -5   8  146.78    4.77
  -6  -4   5    3.74    1.25
   6  -4  -5    4.97    2.02
  -6   4   5    2.96    2.45
   4 -12   0   67.87    3.38
   4 -12   0   72.41    2.87
  -4  12   0   62.80    4.39
   3  13   2    7.81    2.47
  -3  13  -2    3.15    1.84
   3 -13   2    6.37    1.76
  -3  13  -2    4.22    3.04
   3 -13   2    6.65    2.17
   0  -6 -10  124.70    4.33
   0  -6  10  130.84    4.68
   0   6  10  120.63    4.31
   0  -6  10  106.13    4.31
   0   6 -10   88.36    4.23
   0   6  10  129.71    4.69
   0  -6  10   83.39    5.19
   6  -6  -2  132.24    3.99
  -6   6   2  118.64    5.51
   6  -6  -2  125.81    3.42
  -3 -13   4    1.43    1.85
   3 -13  -4    1.77    1.82
  -3  13   4    1.72    1.91
   3 -13  -4    2.88    1.83
  -3 -13   4    2.07    2.94
  -1   9   9    0.79    2.81
  -1  -9   9   -0.15    2.13
   1  -9  -9   -0.49    1.85
  -1   9   9    0.52    2.15
   1   9  -9    0.26    2.12
  -2   0  11    0.68    2.38
  -2   0  11    0.02    2.88
  -2   0  11    0.06    2.07
   2   0 -11    0.87    1.84
  -2   0  11    0.58    1.71
  -5   4   8   56.87    3.04
  -5  -4   8   50.74    4.68
  -4  11   5   30.02    3.50
   4 -11  -5   30.60    2.48
  -4  11   5   23.72    2.56
  -4 -11   5   28.86    2.24
   4 -11  -5   27.25    1.65
  -4 -11   5   22.02    3.70
   4 -11  -5   27.77    2.47
  -5   6  -4    0.25    1.61
   5  -6   4    1.24    1.94
   5  -6   4    0.82    1.64
  -1   2  11   14.60    2.59
   1   2 -11   11.75    2.60
  -1  -2  11   12.50    2.38
  -1   2  11   15.76    1.94
  -1  -2  11   10.40    2.11
  -1  -2  11   16.57    2.76
  -1   2  11   11.90    2.99
  -1  -2  11    7.57    3.16
  -6  -2   6   11.39    1.49
  -6   2   6    8.57    1.43
  -6   6   1    6.72    1.60
  -6   6   1   10.15    3.73
   6  -6  -1   11.53    2.06
   1  14   4  219.57    5.71
   1 -14   4  221.13    5.64
   1 -14   4  233.42    6.34
  -1 -14  -4  234.05    5.79
  -2   1  11   -0.02    2.19
  -2  -1  11    0.27    1.86
  -2   1  11   -0.01    1.70
  -2   1  11    0.92    2.39
   2   1 -11    1.07    1.83
   2  -1 -11    0.99    1.84
  -2   1  11    0.38    2.76
  -2  -1  11    1.75    3.22
  -2  -1  11    1.47    3.30
   1 -12  -7  196.05    4.28
  -1 -12   7  214.21    7.22
   1  12  -7  156.99    5.65
  -1  12   7  271.63    5.85
  -1 -12   7  277.90    6.63
   1 -12  -7  266.92    6.29
  -1 -13   6    0.85    2.71
   1 -13  -6   -0.02    1.52
   1 -13  -6    0.24    1.77
   1  13  -6    0.10    1.93
  -1  13   6    0.38    1.90
  -1  13   6    0.81    2.92
  -1 -13   6    1.10    3.42
  -4  12   3   23.30    3.69
   4 -12  -3   27.67    1.69
   4 -12  -3   22.78    2.53
   4 -12  -3   26.61    2.48
  -4 -12   3   18.62    3.36
  -2 -10  -7   57.86    3.85
   2 -10   7  104.74    4.57
   2  10   7  115.44    4.13
  -2  10  -7   55.88    3.70
  -2  10  -7   75.80    4.81
   2  10   7  121.46    3.87
  -3   5  10   18.34    2.99
   3  -5 -10   20.58    2.45
  -3   5  10   20.80    1.68
  -3  -5  10   11.31    3.51
   3   5 -10   13.89    2.54
  -3   5  10   22.24    3.12
  -3  -5  10   16.12    2.41
   6  -6  -3    5.37    1.96
  -6   6   3    4.25    3.00
  -5  10   2   66.56    3.03
  -5  10   2   77.88    4.57
   5 -10  -2  101.28    2.94
   5 -10  -2  102.73    3.82
   5 -10  -1    0.72    1.33
   5 -10  -1    0.86    1.90
  -5  10   1   -0.75    3.26
  -5  10   1   -0.19    1.59
   6  -3   2   66.20    2.61
   6  -3   2   66.93    3.10
  -6   3  -2   65.68    5.44
   6   3   2   61.59    2.26
  -2  14   4   77.99    4.37
  -2 -14   4   92.58    4.87
   2 -14  -4   58.96    3.08
   2  14  -4   45.97    3.27
  -2  14   4   67.40    2.94
   2 -14  -4   78.38    3.71
  -2 -14   4   76.45    3.43
   0 -13   6   13.73    3.78
   0 -13   6   16.64    3.27
   0 -13  -6   16.68    2.27
   0  13   6   13.71    2.21
   0  13  -6    7.51    2.31
   0  13   6   13.49    3.13
   1  15   2  103.42    3.63
  -1  15  -2   72.65    3.52
   1 -15   2  128.03    4.52
   1  15   2  103.84    4.27
  -1  15  -2   95.50    4.52
   1 -15   2  132.02    4.97
   3  -8   7    2.24    2.48
  -3   8  -7    2.59    3.42
   3  -8   7    1.75    3.15
   3   8   7    3.25    1.92
   3   8   7    3.90    2.33
  -3  -8  -7    3.95    1.56
  -3   8  -7    0.97    2.03
  -2  -2  11    1.26    2.57
   2  -2 -11    1.60    1.96
  -2   2  11    0.47    2.44
  -2  -2  11    2.13    3.44
  -2   2  11    1.58    1.59
  -2   2  11    2.67    2.42
  -2   2  11    1.23    2.77
   2   2 -11    1.64    2.06
  -2  -2  11    2.61    2.09
   0 -12   7   -0.22    3.79
   0 -12  -7    3.22    1.92
   0  12   7    2.32    2.95
   0  12  -7    0.14    2.15
   0  12   7    3.04    2.44
   0 -12   7    2.18    2.91
  -4   0  10  128.50    3.70
  -4   0  10  127.62    4.70
   4   0 -10  101.36    4.01
  -4   0  10   85.16    4.90
   3 -11   5    4.39    2.51
  -3 -11  -5    5.95    1.69
  -3  11  -5    1.85    2.11
   3 -11   5    4.49    2.40
  -3  11  -5    2.33    3.69
   3  11   5    5.12    2.31
   5  -8  -6    2.31    1.82
  -5  -8   6    3.92    1.75
  -5   8   6    3.22    3.09
   5  -8  -6    2.23    1.84
  -5   8   6    1.97    2.08
  -5  -8   6    1.70    3.64
  -1   7  10    0.05    2.20
  -1  -7  10   -0.24    2.04
  -1  -7  10   -0.25    2.49
   1  -7 -10   -0.26    1.79
   1   7 -10    1.08    2.08
  -1   7  10   -0.45    2.76
  -1  -7  10    0.02    3.63
   4  -4   7    3.58    1.88
   4  -4   7    4.80    2.40
  -4   4  -7    0.82    1.83
  -4   4  -7    4.56    5.11
   4   4   7    6.00    2.42
   0 -15   3  195.61    5.30
   0  15   3  191.08    5.40
   5   4   5    1.09    2.20
   5  -4   5    0.17    1.98
   5  -4   5    0.82    1.71
  -5   4  -5    0.78    1.61
   0   0  11    0.47    1.95
   0   0  11   -0.03    2.11
   0   0  11    0.09    2.62
   0   0  11    0.69    3.18
   0   0 -11   -0.13    1.92
   6  -5   1    1.68    1.92
  -6   5  -1    2.31    3.63
   6  -5   1    1.47    1.41
  -4   1  10    5.79    1.65
  -4   1  10    3.73    3.23
  -4  -1  10    4.51    3.11
  -4   1  10    6.64    2.51
  -4  -1  10    6.00    2.48
  -4  -1  10    7.40    1.96
   4  -1 -10    5.40    2.05
   4   1 -10    5.58    1.93
  -3  12  -4    0.37    1.95
   3  12   4    2.07    2.37
   3 -12   4    1.09    2.21
  -3 -12  -4    1.86    1.51
  -3  12  -4    1.92    3.32
   0  -9  -9   56.04    3.16
   0  -9   9   60.63    4.06
   0   9   9   55.18    3.21
   0   9  -9   31.12    3.36
   0  -9   9   30.12    2.60
   0   9   9   52.56    3.70
   0  -9   9   49.70    4.90
   5 -10  -3    9.79    1.42
  -5  10   3    9.59    3.54
   5 -10  -3   12.09    2.10
  -1  -3  11  135.20    5.03
  -1   3  11  124.03    3.28
  -1  -3  11   86.76    5.18
   1   3 -11  106.23    4.63
  -1   3  11  135.49    4.28
  -1  -3  11  124.50    4.14
  -1   3  11  122.38    5.07
  -1  -3  11  100.14    3.39
  -4  12  -1    9.17    2.18
  -4  12  -1   13.35    3.59
   4 -12   1   18.25    2.11
   2   9  -9    4.47    2.31
  -2   9   9    6.55    3.03
   2  -9  -9    9.31    2.21
  -2  -9   9    8.42    2.64
  -2   9   9    9.79    2.93
  -6  -3   6    2.91    1.40
   1   8   9  135.49    4.48
  -1  -8  -9  133.80    4.42
   1   8   9  132.14    4.59
   1  -8   9  127.19    4.95
   0   1  11   15.12    2.35
   0   1 -11   14.13    2.57
   0  -1 -11   14.58    2.32
   0  -1  11   13.03    2.18
   0  -1  11   13.81    3.50
   0   1  11   15.28    2.06
   0   1  11   20.54    2.93
   0  -1  11   20.04    3.59
   0  -1  11   15.51    2.24
  -5  -9   5    0.49    1.43
  -5  -9   5    1.90    3.57
  -5   9   5    0.75    1.97
  -5   9   5    1.11    3.21
   5  -9  -5    0.66    1.64
   5  -9  -5    1.04    1.86
   3  -8  -9   29.48    2.74
  -3  -8   9   29.84    2.89
  -3   8   9   26.51    3.25
  -3   8   9   26.53    1.63
  -4  -8   8    6.28    3.54
   4  -8  -8    9.99    2.17
  -4   8   8    8.74    2.93
  -4   8   8    6.23    2.10
  -4  -8   8    8.68    2.23
   1  -5  10  148.04    5.46
   1   5  10  166.17    4.89
  -1  -5 -10  145.78    4.65
   1  -5  10  134.43    5.90
   1   5  10  167.13    4.97
   1  -5  10  152.30    4.90
   1 -10   8    9.76    3.17
   1  10   8   10.16    2.15
  -1 -10  -8    9.75    1.96
   6  -6   0   95.42    3.57
  -6   6   0   84.61    5.18
  -3 -11   7   82.34    3.64
   3  11  -7   47.18    3.36
   3 -11  -7   87.06    3.87
  -3  11   7   63.69    3.15
   3 -11  -7   78.93    3.06
  -3  11   7   78.92    4.51
  -3 -11   7   54.63    4.60
  -4   7  -6   -0.17    1.94
   4  -7   6    1.37    1.81
  -4   7  -6    0.85    3.57
   4  -7   6    0.61    2.34
   4   7   6    2.04    2.22
   5 -10   0    2.45    1.47
  -5  10   0    1.91    3.26
  -5  10   0    0.01    1.65
   5 -10   0    1.66    1.96
   2 -14   3    2.06    2.36
   2  14   3    2.66    2.59
   2 -14   3    3.07    3.76
  -2  14  -3    2.88    3.09
   2   6   9    5.82    2.21
   2  -6   9    5.94    2.84
  -2   6  -9    5.69    4.86
   2  -6   9    6.49    4.09
  -2   6  -9    4.04    2.21
  -2  -6  -9    6.28    1.78
   1 -15  -3    0.15    1.69
  -1 -15   3    0.53    2.58
  -1  15   3    0.84    2.83
   1  15  -3   -0.02    1.79
  -1 -15   3    1.29    2.94
  -1  15   3    0.01    1.75
   1 -15  -3   -0.60    1.86
  -1  11   8  118.23    4.56
  -1 -11   8   63.87    3.20
   1 -11  -8  105.44    2.98
   1  11  -8   59.67    3.72
  -1 -11   8  114.89    4.71
   1 -11  -8  107.18    4.35
  -1 -11   8   73.85    5.20
  -1  11   8  100.78    4.79
  -4  10  -4    1.30    3.64
   4  10   4    1.72    2.42
   4 -10   4    0.84    1.75
   4 -10   4    1.11    2.08
  -4  10  -4   -0.37    1.77
   4   6  -9    0.03    1.98
  -4   6   9    0.14    2.55
   4  -6  -9    0.44    1.73
  -4  -6   9    0.65    1.90
  -4   6   9    0.40    1.23
  -4   6   9    0.35    2.10
  -4  -6   9    1.14    3.44
   3 -12  -6   31.01    2.34
  -3  12   6   24.42    2.52
  -3 -12   6   22.92    3.67
   3 -12  -6   32.01    2.72
  -3 -12   6   32.76    2.81
   3  12  -6   16.21    2.49
  -3  12   6   31.22    3.48
  -6  -5   5   99.16    2.71
   6  -5  -5   97.61    3.62
  -1 -14   5  110.18    5.34
  -1  14   5  104.47    4.74
  -1 -14   5  120.29    4.66
   1 -14  -5  116.31    3.20
   1 -14  -5  112.50    4.42
  -1  14   5  101.69    3.44
   6  -6  -4  197.12    4.81
  -6  -6   4  193.84    3.24
   5   8   3  202.59    4.67
   5  -8   3  166.63    4.67
   0 -14  -5   71.01    3.57
   0  14   5   56.95    4.08
   0 -14   5   67.27    4.89
   0 -14   5   77.33    4.68
   0  14   5   62.13    2.97
   3 -14  -1   55.38    3.17
   3 -14  -1   62.37    2.60
  -4   2  10   68.17    3.51
  -4  -2  10   61.00    4.59
  -4  -2  10   69.87    3.60
   4  -2 -10   65.67    3.27
  -4   2  10   88.33    2.94
  -4  -2  10   88.15    3.23
  -4   2  10   55.12    4.29
   4   2 -10   58.21    3.26
   5  -9   2   89.19    3.21
   5  -9   2   90.62    3.68
   0   2 -11    5.37    2.30
   0   2  11    6.91    2.41
   0  -2 -11    6.04    2.10
   0  -2  11    7.08    2.26
   0   2  11    7.24    1.94
   0  -2  11    8.76    2.74
   0  -2  11    3.82    3.39
  -2  -3  11  360.35    6.55
   2   3 -11  294.53    7.29
  -2  -3  11  222.66    7.51
  -2   3  11  332.15    5.18
  -2   3  11  348.77    6.50
  -2  -3  11  265.04    6.13
  -2   3  11  317.04    6.79
   2  -3 -11  317.83    7.01
  -4  11  -3   24.67    4.20
   4 -11   3   33.75    2.90
   4  11   3   35.73    2.70
   4 -11   3   28.35    2.36
  -5  -5   8   52.39    4.71
  -5   5   8   71.81    3.73
  -5   5   8   83.34    2.61
   5  -5  -8   80.53    3.51
  -5   5   8   60.95    3.23
  -5  -5   8   83.85    3.04
  -3  -6  -8   58.07    2.76
   3   6   8   62.71    3.58
   3   6   8   63.34    3.37
   3  -6   8   51.03    4.28
   3  -6   8   55.87    3.67
  -3   6  -8   49.89    5.59
   2  -7 -10   10.33    2.25
  -2  -7  10    8.57    2.24
  -2   7  10    9.31    1.33
   2   7 -10    5.91    2.27
  -2   7  10    9.21    3.01
  -2  -7  10    5.27    3.67
   3 -10   6    5.76    2.51
   3  10   6    7.67    2.57
  -3  10  -6    2.04    1.98
  -3 -10  -6    8.57    1.68
  -3  10  -6    3.50    3.62
   5  -7  -7    0.16    1.70
  -5  -7   7    0.34    1.74
  -5  -7   7   -0.79    3.46
  -5   7   7    1.02    2.74
  -5   7   7    0.31    2.04
   2 -15  -1   72.98    3.29
  -2  15   1   66.20    4.44
  -2  15   1   65.22    3.38
  -2  12   7   -0.28    2.89
   2 -12  -7    0.23    1.60
  -2 -12   7    0.04    3.27
  -2  12   7    0.34    2.14
   2  12  -7    0.63    2.13
  -2 -12   7    0.06    2.52
   6   4   2   18.07    1.44
   6  -4   2   19.37    1.85
   6  -4   2   21.16    2.38
  -6   4  -2   16.93    3.83
  -3  14   0    8.45    3.40
  -3  14   0    4.07    1.91
   3 -14   0    7.85    2.15
   3 -14   0    9.61    1.77
  -2  15   0   60.69    4.12
   2 -15   0   77.58    3.48
   2 -15   0   82.29    4.07
  -2  15   0   48.83    3.11
  -4 -12   4   31.82    2.04
   4 -12  -4   33.40    1.77
  -4 -12   4   24.67    3.51
  -4  12   4   24.77    2.63
  -4  12   4   27.51    3.91
   4 -12  -4   29.88    2.66
   3 -14  -2   16.29    1.72
  -3  14   2   15.02    3.29
   3 -14  -2   14.32    2.19
  -2 -13   6   12.09    3.69
   2  13  -6    5.97    2.32
  -2  13   6   10.50    2.08
  -2 -13   6   13.77    2.74
   2 -13  -6    9.10    1.90
   3   0   9  124.04    5.30
   3   0   9  131.55    4.69
   4  -9   5  159.05    5.06
   4   9   5  175.54    4.73
   0 -11   8   29.62    3.59
   0  11   8   31.71    2.89
   0 -11   8   23.23    4.32
   0 -11  -8   30.02    2.70
  -2   0 -10   87.98    4.02
   2   0  10   98.56    4.91
   6   0   3   -0.12    1.26
   0  -7 -10   37.64    2.85
   0   7 -10   23.32    2.91
   0  -7  10   25.89    2.88
   0  -7  10   24.76    4.18
   0  -7  10   37.00    3.34
   0   7  10   37.65    3.15
   0   7  10   40.80    3.21
   3 -10  -8   92.94    4.12
  -3  10   8   76.74    4.36
  -3  10   8   69.74    3.87
   3 -10  -8   82.18    3.16
  -3 -10   8   96.56    3.98
  -3 -10   8   56.23    5.10
   3  10  -8   54.15    3.57
  -5   0   9   70.57    4.97
  -5   0   9   77.56    3.20
   5   0  -9   81.87    3.40
  -6   7   2    3.75    3.45
   6  -7  -2    4.36    1.45
   6  -7  -2    7.53    2.34
  -6   7   2   -0.01    1.51
   3  -1   9   73.31    4.82
   3   1   9   81.48    3.88
  -3   1  -9   23.22    3.05
  -3  -1  -9   30.78    2.94
   3  -1   9   89.73    4.58
   2  -1  10   50.10    4.28
   2   1  10   62.82    3.46
   2  -1  10   67.29    3.92
  -2  -1 -10   43.26    2.85
   2  -1  10   55.41    3.22
  -2   1 -10   40.21    3.10
  -3   6  10    3.51    2.87
  -3  -6  10    3.29    3.63
  -3  -6  10    1.89    2.04
  -3   6  10    3.80    1.30
  -3   6  10    2.65    2.86
   3   6 -10    2.57    2.24
   3  -6 -10    3.38    1.93
   6  -1   3  177.92    3.96
   6   1   3  175.80    3.78
   3 -13   3   98.33    4.07
   3 -13   3   95.32    3.77
   3  13   3  100.03    3.96
   1   4 -11   63.76    4.09
  -1  -4  11   70.87    3.79
  -1  -4  11   86.51    3.76
  -1   4  11   85.10    3.73
  -1   4  11   81.91    2.69
  -1  -4  11   60.50    4.88
   6  -4  -6   54.02    2.98
  -6  -4   6   57.06    2.29
  -5  -1   9   -0.61    1.81
  -5   1   9    0.80    1.42
   5  -1  -9   -0.32    1.65
  -5   1   9   -0.86    3.00
  -5  -1   9    1.15    3.47
  -5   1   9   -0.75    1.89
   2 -15  -2    2.35    2.16
   2  15  -2    4.26    2.00
  -2  15   2    7.14    1.98
   5 -10  -4   11.03    2.14
   5 -10  -4   11.51    2.16
  -5 -10   4    5.79    3.41
   5 -10  -4   13.02    1.53
  -5  10   4   11.34    3.55
   4   3 -10    1.85    1.84
  -4  -3  10    1.84    2.17
  -4   3  10    2.58    2.26
  -4   3  10    2.30    1.49
  -4   3  10    1.15    3.23
  -4  -3  10    0.50    3.27
   4  -3 -10    1.89    1.73
  -5   7  -4    0.53    3.76
  -5   7  -4    0.04    1.50
   5  -7   4    0.97    1.78
   5   7   4    1.03    1.91
   5  -7   4    0.76    2.02
  -6   7   1   31.63    4.40
   6  -7  -1   35.53    2.10
   6  -7  -1   39.10    2.75
   4  -5   7   93.74    3.89
  -4   5  -7   92.38    6.68
   4  -5   7   88.37    3.55
   5  -5   5   47.64    2.86
   5  -5   5   50.31    3.08
  -5   5  -5   51.15    5.16
   0  -3  11  271.70    6.43
   0   3 -11  202.37    6.46
   0   3  11  257.58    5.70
   0  -3  11  277.36    6.07
   0  -3 -11  252.03    6.20
   0  -3  11  201.32    6.60
  -3  13   5   18.50    2.31
   3 -13  -5   24.81    2.57
  -3 -13   5   22.82    2.48
   3 -13  -5   29.37    2.78
  -3  13   5   24.85    3.59
  -3 -13   5   18.41    3.42
   2 -11  -8   74.26    3.21
  -2 -11   8   61.93    4.82
  -2  11   8   88.34    3.73
  -2 -11   8  110.60    4.50
   2  11  -8   53.68    3.73
  -2  11   8   92.71    4.74
  -6   7   3    0.59    3.02
   6  -7  -3    0.86    1.90
   6  -7  -3    1.52    1.43
   1  15   3   29.96    3.30
  -1 -15  -3   32.23    2.74
  -1  15  -3   26.51    3.51
   1 -15   3   38.07    3.97
   1 -15   3   35.69    3.22
   2 -15   1   14.90    3.68
  -2  15  -1    6.97    2.17
   2  15   1   14.94    2.85
   2 -15   1   14.38    2.39
  -2  15  -1   12.42    3.33
   3   0 -11  225.56    5.89
  -3   0  11  211.34    5.64
  -2   9  -8   25.90    4.28
   2  -9   8   32.06    3.67
   2   9   8   37.59    3.34
  -2   9  -8   14.05    2.65
   2   9   8   38.30    3.11
   2  -9   8   23.28    4.60
  -2  -9  -8   34.48    2.47
   5 -10   1    2.13    2.07
  -5  10  -1    1.31    1.73
   5 -10   1    2.21    1.63
  -6   0   7    0.04    1.30
   3  -2   9  109.95    5.45
   3  -2   9   86.42    3.86
  -3  -2  -9   88.24    3.33
   3  -2   9  109.46    4.15
   3   2   9  126.21    4.60
   2  -2  10    1.32    3.43
   2  -2  10    0.32    2.32
   2   2  10    0.03    2.36
  -2  -2 -10   -0.52    1.66
  -2   2 -10    0.75    2.13
  -6   2  -3  146.34    7.45
   6  -2   3  137.55    3.61
   6   2   3  148.30    3.41
   3 -14   1   33.77    2.34
  -3  14  -1   27.99    3.92
   3 -14   1   33.88    2.90
  -3  -1  11   59.63    4.47
  -3  -1  11   68.42    3.57
  -3   1  11   57.63    4.15
   3  -1 -11   82.26    3.90
   3   1 -11   63.31    3.49
  -3   1  11   85.61    3.15
  -3  -1  11   92.44    3.52
  -3   1  11   74.42    3.71
  -5   2   9  216.45    4.10
  -5  -2   9  179.49    3.96
  -5   2   9  172.39    4.43
  -5  -2   9  142.97    6.10
  -5  -2   9  221.68    4.51
   5  -2  -9  198.21    5.10
  -2   4  11   41.62    2.25
  -2  -4  11   28.36    4.46
  -2  -4  11   39.32    2.98
   2   4 -11   26.65    2.98
  -2   4  11   34.55    3.16
  -2   4  11   33.42    3.02
   2  -4 -11   43.57    3.04
  -2  -4  11   30.28    3.02
   6  -6   1  140.51    3.65
   6  -6   1  140.40    4.28
  -6   1   7    0.06    1.30
  -6  -1   7    0.33    1.42
  -6   1   7   -0.26    1.72
   3 -14  -3   13.22    2.40
  -3  14   3   11.94    3.42
  -3 -14   3   13.35    2.94
   3 -14  -3   13.98    2.24
  -1 -13  -6    9.11    2.08
   1 -13   6   11.21    3.99
   1  13   6    8.36    3.05
  -1  13  -6    3.49    2.35
   1 -13   6    9.94    3.11
   1  13   6   11.01    2.33
  -1  13  -6    6.44    3.46
   2  12   6   35.39    3.23
  -2 -12  -6   12.95    2.63
   2 -12   6   32.58    4.62
  -2  12  -6   25.96    4.02
  -2  12  -6   16.78    2.66
  -4  12  -2   16.59    3.70
   4 -12   2   19.53    2.15
   2 -13   5    0.20    2.51
  -2 -13  -5   -0.10    1.64
   2  13   5    0.20    2.47
  -2  13  -5    0.02    3.32
   2 -13   5    0.42    4.11
  -4  11   6    2.84    2.95
   4 -11  -6    4.00    1.92
   4 -11  -6    3.18    1.16
  -4 -11   6    2.44    1.94
  -4  11   6    1.41    2.16
  -4 -11   6    2.04    3.26
   4 -11  -6    3.45    1.82
   4 -10  -7    7.63    2.16
  -4 -10   7    6.49    2.22
  -4  10   7    9.00    3.33
  -4 -10   7    4.16    3.48
   4 -10  -7    6.65    1.94
  -1   6 -10    5.82    2.32
  -1  -6 -10    9.96    2.06
   1   6  10   14.49    2.70
   1  -6  10    9.07    2.98
   1   6  10   12.46    2.83
   1  -6  10    8.70    3.90
   1  -6  10   10.38    2.87
   5   0   6   -0.72    1.70
   0  16   0   69.47    4.12
   0 -16   0   57.60    3.17
  -6  -6   5   62.37    2.26
   6  -6  -5   57.69    3.07
   5  -1   6   50.36    2.88
   5   1   6   53.06    2.65
  -2  14   5    6.01    1.98
   2  14  -5    2.07    2.19
  -2 -14   5    4.66    3.47
  -2 -14   5    6.03    2.48
   2 -14  -5    4.65    1.87
  -1 -10   9   18.56    2.34
   1  10  -9   14.96    2.84
   1 -10  -9   27.64    2.70
  -1  10   9   28.53    3.14
  -1  10   9   24.71    3.48
  -1 -10   9   30.71    3.40
   6  -5   2   10.92    1.71
   6  -5   2   10.59    2.21
  -6   5  -2    9.34    4.06
  -3   2  11    2.77    3.04
  -3   2  11    2.06    2.36
  -3  -2  11    2.05    2.20
   3   2 -11    2.67    1.97
  -3   2  11    4.21    1.63
  -3  -2  11    2.74    3.22
   3  -2 -11    3.56    1.95
  -3  -2  11    4.61    2.01
   0 -15  -4   31.01    2.73
   0  15   4   30.43    3.31
   0 -15   4   40.09    4.09
   0 -15   4   30.61    3.46
   1 -12   7  321.42    7.86
   1  12   7  294.61    6.60
   1  12   7  332.45    6.34
  -1 -12  -7  307.27    6.44
  -6  -2   7    2.81    1.45
  -6   2   7    3.12    1.44
  -6   2   7    0.70    1.85
  -6   7   0    0.01    1.40
   6  -7   0    0.76    1.37
  -6   7   0    0.70    3.70
   6  -7   0    0.63    1.88
   1 -15  -4    4.51    2.04
  -1  15   4    2.65    1.76
  -1  15   4    2.78    2.95
  -1 -15   4    3.38    2.75
  -1 -15   4    4.86    3.34
   1  15  -4    1.88    2.06
   1   8 -10    0.73    2.22
   1  -8 -10    1.62    2.00
  -1   8  10    2.16    2.78
  -1   8  10    1.61    2.25
  -1  -8  10    1.26    2.24
  -1  -8  10    1.76    2.68
  -1  -8  10    1.25    3.89
   2  -7   9   11.00    3.06
   2  -7   9   12.04    4.40
  -2  -7  -9   12.54    2.05
   2   7   9   12.34    2.54
  -2   7  -9   11.13    5.12
  -2   7  -9    4.02    2.25
   0  16  -1   -0.05    1.95
   0  16   1   -0.05    1.95
   0  16  -1    0.78    2.68
   0 -16   1    0.39    2.31
   0  16   1   -0.61    2.73
  -5   6   8    0.43    1.28
  -5  -6   8    0.99    1.85
  -5   6   8   -0.46    2.64
  -5   6   8    0.11    2.07
   5  -6  -8    0.99    1.81
   4   7  -9    0.98    2.19
  -4   7   9    2.26    2.36
  -4   7   9    2.58    2.75
  -4   7   9    2.21    1.23
   4  -7  -9    2.77    1.89
  -4  -7   9    2.78    2.00
   1  14   5   85.93    4.38
   1 -14   5   89.31    5.23
   1 -14   5   89.20    4.49
  -1 -14  -5   87.34    3.85
  -3   3  -9   -0.12    1.82
   3   3   9   -0.36    2.17
   3  -3   9    0.38    2.54
   3  -3   9   -0.46    3.98
  -3  -3  -9   -0.21    1.56
  -4   4  10    5.48    2.90
  -4   4  10    4.71    2.43
  -4   4  10    6.53    1.46
   4  -4 -10    5.53    1.96
  -4  -4  10    4.95    3.32
   4   4 -10    4.98    2.05
   3   9   7  172.48    4.57
   3   9   7  168.78    4.91
   3  -9   7  149.99    5.79
   3  -9   7  143.76    4.89
   2  15  -3    1.14    2.08
   2 -15  -3    2.16    1.90
  -2 -15   3    3.66    3.02
   2 -15  -3    3.10    2.11
  -2  15   3    2.62    1.82
  -2  15   3    3.05    3.18
  -2 -15   3    2.49    2.21
  -4  13   1    0.11    1.81
   4 -13  -1    0.59    1.53
   4 -13  -1    0.82    1.99
   2   3  10   10.83    2.75
  -2  -3 -10    7.06    1.92
  -2   3 -10    5.33    2.11
   2   3  10    8.61    2.37
   2  -3  10    9.81    2.65
   2  -3  10    7.37    3.69
   6  -3   3  111.13    3.70
  -6   3  -3   95.88    6.26
   6  -3   3  103.53    3.20
   6   3   3  105.99    2.85
  -5   3   9    1.58    1.43
  -5  -3   9    1.98    1.67
  -5   3   9    1.44    1.99
  -5  -3   9    1.22    3.59
   5  -3  -9    1.74    1.79
  -6   7   4    1.37    3.01
  -6  -7   4    0.59    1.14
   6  -7  -4    0.60    1.91
   0  -4  11   15.47    3.60
   0   4  11   28.64    3.23
   0  -4 -11   22.11    2.55
   0  -4  11   21.74    2.82
   0   4  11   25.76    3.25
   0  -4  11   22.99    2.78
  -4  13   2   46.64    2.87
   4 -13  -2   61.02    3.27
  -4 -13   2   48.61    3.71
   4 -13  -2   63.99    2.56
   5   2   6   50.00    3.02
   5  -2   6   60.42    3.04
  -4   8  -6   31.34    4.59
   4  -8   6   38.64    2.79
   4  -8   6   38.80    3.30
   4   8   6   43.50    3.06
  -1  -5  11   10.99    3.33
  -1   5  11   12.30    2.90
  -1  -5  11    5.35    3.78
   1   5 -11    7.67    2.39
  -1  -5  11    9.48    2.62
   1  -5 -11    8.84    2.15
  -5  -9   6  134.66    3.69
  -5   9   6  112.39    5.05
  -5   9   6   90.33    3.87
   5  -9  -6  108.04    4.06
  -5  -9   6   76.29    5.37
   5  -9  -6  117.97    3.98
  -6   5   6    0.48    2.67
  -6  -5   6    0.34    1.34
   6  -5  -6    0.41    1.97
   3   7   8    5.42    2.27
  -3   7  -8    2.29    2.19
  -3  -7  -8    5.82    1.76
   3  -7   8    6.13    3.96
  -3   7  -8    4.88    4.56
   3  -7   8    3.88    2.80
   3   7   8    6.03    2.43
   2 -11   7   74.58    4.25
  -2  11  -7   34.58    3.18
  -2 -11  -7   41.52    3.42
   2  11   7   79.91    3.18
   2  11   7   80.39    3.83
   2 -11   7   64.75    5.10
  -2  11  -7   55.92    4.58
   1   9   9    8.46    2.45
   1  -9   9    7.64    3.11
  -1  -9  -9    8.93    2.03
   1  -9   9    4.44    3.74
  -5  11   2   73.52    4.80
  -5  11   2   66.54    3.14
  -2  15  -2   10.81    3.39
  -2  15  -2    4.33    2.11
   2  15   2   11.64    2.90
   2 -15   2   12.83    3.98
   2 -15   2   12.81    2.56
  -3  -9   9   16.83    2.79
  -3   9   9   16.43    1.55
  -3   9   9   11.09    2.60
  -3  -9   9    8.61    4.10
  -3   9   9   13.48    3.22
   3  -9  -9   18.14    2.42
   3   9  -9    9.01    2.40
   4 -12  -5    0.34    1.83
   4 -12  -5    0.33    1.88
   4 -12  -5    0.61    1.10
  -4  12   5   -0.03    1.95
  -4 -12   5    0.34    3.28
  -4  12   5    0.91    3.06
  -4 -12   5    0.63    1.82
  -4   9   8   58.51    4.07
  -4  -9   8   66.98    3.44
   4  -9  -8   56.33    2.91
   4  -9  -8   72.69    3.82
   5 -11  -1    6.28    1.56
  -5  11   1    4.99    3.56
  -5  11   1    3.61    1.89
  -2 -14  -4   25.51    2.47
   2 -14   4   26.87    3.14
   2 -14   4   25.63    4.55
  -2  14  -4   17.28    3.39
   2  14   4   26.49    3.21
  -4  13   0    0.58    1.94
   4 -13   0    1.63    1.73
  -4  13   0    0.88    3.21
   4 -13   0    1.93    2.12
   1  16   0    8.26    2.78
  -1  16   0    5.80    2.21
   1  16   0    6.37    2.11
  -1  16   0    8.94    3.35
   1 -16   0   10.39    2.38
   3  -3 -11   -0.23    1.77
  -3   3  11    0.39    2.37
  -3  -3  11    0.16    1.93
  -3  -3  11    0.99    3.17
   3   3 -11    0.49    2.04
  -3   3  11    0.44    1.50
  -3  -3  11   -0.29    2.17
   4   0   8   39.79    2.76
   4   0   8   36.84    2.89
  -6   3   7   50.61    3.34
  -6  -3   7  113.87    3.11
  -2   8  10   84.71    4.37
  -2   8  10   86.90    4.60
  -2  -8  10   64.80    3.49
  -2  -8  10   42.65    4.68
   2  -8 -10   93.98    4.21
   2   8 -10   47.12    3.44
  -1  16   1    2.87    1.94
   1  16  -1    1.50    2.00
  -1  16   1    1.22    3.18
   1 -16  -1    2.61    2.03
  -5  -8   7   52.16    4.75
  -5  -8   7   97.60    3.28
  -5   8   7   67.64    3.46
   5  -8  -7   85.85    3.84
   5  -8  -7   93.30    3.92
  -5   8   7   78.63    4.31
   0  10   9   39.79    3.75
   0 -10  -9   39.78    2.90
   0 -10   9   19.73    2.51
   0  10   9   39.09    3.00
   0  10  -9   19.32    3.01
  -2 -10   9   -0.34    2.44
  -2 -10   9    0.33    3.42
   2  10  -9    0.23    2.30
  -2  10   9   -0.70    2.25
  -2  10   9   -0.59    3.00
   1   0  11    9.82    2.28
  -1   0 -11    7.37    2.16
  -4   6  -7    9.02    4.83
   4  -6   7   10.26    2.59
  -4   6  -7    2.02    2.10
   4   6   7   12.08    2.42
   4   6   7    9.45    2.34
   4  -6   7    8.65    2.26
   5  -6   5  128.84    4.17
  -5   6  -5  115.22    6.42
   5  -6   5  123.80    4.29
  -5 -10   5    7.47    3.84
   5 -10  -5   11.27    1.53
  -5 -10   5   10.67    1.63
   5 -10  -5   10.08    2.10
   5 -10  -5   12.30    2.21
  -5  10   5    9.47    3.52
  -2  -5  11   40.19    3.13
  -2  -5  11   21.34    4.13
  -2   5  11   36.36    2.09
  -2   5  11   34.86    3.34
   2  -5 -11   37.33    3.04
  -2  -5  11   27.26    2.85
  -2   5  11   37.25    3.43
   2   5 -11   24.23    3.06
  -5   9  -3    1.36    3.93
   5  -9   3    1.45    2.02
  -5   9  -3    0.17    1.83
   5  -9   3    1.20    1.79
   5   9   3    1.70    2.13
   4  -1   8   29.38    2.67
   4   1   8   37.88    3.49
  -3   7  10    0.36    2.48
   3  -7 -10    1.51    2.08
   3   7 -10    1.24    2.09
  -3   7  10    0.87    2.80
  -3  -7  10    1.95    2.23
  -3  -7  10   -0.69    3.73
  -3   7  10    0.69    1.31
   3 -14   2   21.89    2.49
  -3  14  -2   17.39    3.60
   3  14   2   22.62    2.96
   3 -14   2   23.84    2.80
  -1   1 -11   13.34    2.57
   1  -1  11   16.12    2.82
  -1  -1 -11   11.96    2.28
   1   1  11   14.78    2.40
   1  -1  11   17.42    2.64
   1  -1  11   13.27    3.74
   0  16  -2   21.49    3.18
   0  16   2   18.98    2.29
   0 -16   2   19.84    2.99
   0  16  -2   11.49    2.41
   0  16   2   18.75    3.34
  -1  13   7   15.45    2.33
   1 -13  -7   21.10    2.68
  -1 -13   7   14.98    3.92
  -1 -13   7   19.08    3.25
   4 -13  -3   40.26    2.85
   4 -13  -3   45.17    2.23
  -4 -13   3   29.58    3.74
  -4  13   3   32.69    4.00
   4 -13  -3   39.76    2.99
   5   3   6   63.44    3.44
   5  -3   6   52.61    2.97
   5 -11  -3    1.12    1.32
   5 -11  -3    1.55    1.82
   5 -11  -3    0.95    1.92
  -5  11   3    0.25    3.52
   0   8 -10   21.22    3.12
   0  -8 -10   38.60    2.92
   0   8  10   38.29    3.11
   0  -8  10   24.80    2.97
   0  -8  10   42.13    3.55
   0   8  10   40.11    3.58
   0  -8  10   31.03    4.45
  -3  14   4    7.70    1.97
   3 -14  -4    8.62    2.18
  -3 -14   4    8.87    3.14
   3 -14  -4   11.57    2.17
  -1  16  -1    6.78    2.20
   1 -16   1   13.48    2.58
   1  16   1   10.83    2.09
  -1  16  -1   12.84    3.12
   1  16   1   10.92    3.03
   6  -8  -2    3.79    1.47
  -6   8   2    0.12    1.63
   6  -8  -2    4.04    1.96
  -6   8   2    2.63    3.11
  -3  -4  -9   31.33    2.53
   3   4   9   38.13    3.18
   3  -4   9   28.87    3.26
   3  -4   9   29.86    4.64
   3 -12   5   57.41    4.14
   3 -12   5   58.64    3.70
   3  12   5   64.65    3.61
   1  11   8   30.24    3.44
  -1 -11  -8   29.04    2.61
   1  11   8   28.04    2.58
   2  -4  10    1.60    3.65
   2  -4  10    1.50    2.91
   2   4  10    3.58    2.50
  -2   4 -10    1.30    2.04
   2   4  10    1.83    2.50
  -2  -4 -10    1.29    1.77
   2  -4  10    2.37    2.76
   5 -10   2   14.43    2.09
   5 -10   2   14.60    2.37
  -6   4  -3   57.23    5.56
   6  -4   3   57.69    3.05
   6  -4   3   56.36    2.62
  -5  11   0   54.08    3.05
   5 -11   0   97.62    3.92
  -5  11   0   68.11    4.77
   5 -11   0   96.21    3.33
  -5  -4   9    1.14    3.70
  -5  -4   9    0.34    1.70
   5  -4  -9    0.27    1.76
  -5   4   9    0.34    1.99
  -5   4   9    0.03    1.29
   4   2   8  143.59    4.67
   4  -2   8  125.13    4.17
   4  11   4    0.09    2.30
  -4  11  -4    1.49    3.86
   4 -11   4    0.29    2.21
   4 -11   4    1.04    1.85
  -4  11  -4   -0.20    1.98
  -1  14   6   33.21    3.89
  -1 -14   6   41.81    3.73
  -1 -14   6   34.40    4.47
   1 -14  -6   37.84    2.96
  -1  14   6   35.66    2.65
  -5   8  -4    0.07    1.82
   5  -8   4    3.27    1.91
   5   8   4    3.56    2.37
   5  -8   4    2.52    2.17
  -5   8  -4    2.72    4.15
   1  -2  11    2.26    2.41
   1  -2  11    2.51    3.60
  -1   2 -11    1.11    2.14
   1   2  11    2.02    2.90
   1  -2  11    1.92    2.27
  -1  -2 -11    1.72    1.90
   1   2  11    1.30    2.42
   6  -8  -1   13.08    1.68
  -6   8   1   10.85    4.10
   6  -8  -1   13.50    2.30
  -1  16   2    4.52    1.87
  -1  16   2    7.43    3.22
   1  16  -2    3.88    2.02
   1 -16  -2    6.93    2.02
  -1 -16   2    5.06    2.67
  -6   7  -1    0.22    3.98
   6  -7   1   -0.27    1.97
   0  13   7    1.67    3.09
   0  13  -7    1.12    2.26
   0 -13   7    0.12    3.86
   0 -13  -7    1.22    1.98
   0  13   7    0.76    1.97
   0 -13   7    0.51    2.98
  -4  -5  10   29.74    2.46
  -4   5  10   26.76    1.88
  -4   5  10   24.19    2.85
   4   5 -10   19.60    2.70
   4  -5 -10   25.64    2.56
  -4  -5  10   17.85    4.06
  -6   8   3    5.43    3.46
   6  -8  -3    5.86    2.01
   6  -8  -3    5.36    1.52
   3 -12  -7   56.37    3.46
  -3 -12   7   35.81    4.37
  -3  12   7   46.91    3.00
   3  12  -7   29.45    3.14
   3 -12  -7   51.79    2.79
  -3 -12   7   51.90    3.31
  -3  12   7   54.41    4.09
   6  -6   2   60.21    3.24
   6  -6   2   61.14    2.73
  -1 -15  -4   73.74    3.66
   1  15   4   68.47    4.07
   1 -15   4   70.73    4.05
   1 -15   4   82.02    4.91
   0  -5  11    0.11    3.42
   0  -5  11    0.82    2.54
   0  -5 -11    0.50    1.80
   0  -5  11   -0.40    2.46
   0   5  11   -0.09    3.42
   0   5  11    0.03    2.74
   1 -12  -8   32.96    2.96
  -1 -12   8   34.88    3.58
  -1  12   8   29.69    2.86
  -1  12   8   29.62    3.71
  -1 -12   8   24.05    4.39
   0  14   6  187.57    4.86
   0 -14   6  217.65    7.33
   0 -14   6  218.41    6.32
   0  14   6  192.86    6.04
   0 -14  -6  213.92    5.68
   1  -7  10    5.00    3.79
   1   7  10    8.15    2.97
  -1   7 -10    3.27    2.27
   1  -7  10    6.39    3.10
   1   7  10    7.48    2.84
  -1  -7 -10    5.88    2.05
   1  -7  10    3.71    2.63
   3 -11   6    1.69    3.42
  -3  11  -6    0.70    1.90
   3  11   6    0.94    2.31
  -3  11  -6    1.12    3.78
   3 -11   6    2.06    2.64
   4  10   5   72.74    3.72
   4 -10   5   66.35    3.88
   3 -13   4    0.70    2.81
   3  13   4    0.93    2.55
  -3  13  -4    0.19    1.97
  -3  13  -4    1.13    3.55
  -4  13  -1    4.25    3.50
   4 -13   1    3.82    1.76
   4 -13   1    4.11    2.14
  -4  13  -1    2.87    2.11
  -3  -4  11   10.13    2.58
   3   4 -11    9.56    2.55
  -3  -4  11    7.22    3.55
  -3   4  11   12.73    2.95
  -3  -4  11   14.17    2.49
   3  -4 -11   11.72    2.26
  -3   4  11   13.67    1.72
  -6   4   7   39.02    2.65
  -6  -4   7   58.68    2.45
  -6  -7   5    5.22    1.38
   6  -7  -5    5.49    2.05
  -6   7   5    3.48    3.19
   2 -15  -4   12.25    2.23
  -2 -15   4   16.10    2.65
  -2  15   4   13.61    2.21
  -2 -15   4   15.79    3.40
  -2  15   4   13.40    3.47
   2  15  -4    7.67    2.47
   4 -12   3   20.74    2.33
   4  12   3   24.29    2.78
  -4  12  -3   17.77    4.02
   4 -12   3   22.75    2.80
  -3  13   6   48.37    3.06
   3 -13  -6   61.39    2.95
  -3 -13   6   43.73    4.35
  -3 -13   6   62.59    3.38
  -3  13   6   50.00    4.22
   3 -13  -6   62.44    3.51
  -1   6  11  481.36    8.16
  -1   6  11  529.41    8.63
   1   6 -11  321.75    8.30
  -1  -6  11  287.18    8.46
   1  -6 -11  443.33    8.12
  -1  -6  11  401.76    7.43
  -1  -6  11  505.39    8.52
  -6  -6   6  288.27    4.46
   6  -6  -6  298.41    6.15
  -3 -11   8   35.08    2.97
   3 -11  -8   37.40    2.97
  -3 -11   8   23.01    4.39
  -3  11   8   28.88    3.02
   3 -11  -8   37.30    2.62
   3  11  -8   19.89    2.85
  -3  11   8   31.11    3.73
   4  -3   8   17.55    2.65
   4   3   8   21.76    2.90
  -5   7   8   10.50    3.26
   5  -7  -8   10.90    2.21
  -5   7   8    6.67    2.32
  -5  -7   8   10.59    2.01
  -5  -7   8    5.43    3.76
   6   0   4   34.14    2.13
   5  -4   6   36.98    2.76
   5   4   6   48.07    3.05
   5  -4   6   44.26    3.18
  -5   4  -6   47.12    6.22
   1   3  11   15.06    2.65
  -1  -3 -11   12.75    2.26
  -1   3 -11    9.46    2.60
   1   3  11   19.35    3.07
   1  -3  11   15.30    3.05
   1  -3  11   11.05    3.87
   1  -3  11   14.06    2.76
   2 -10   8   19.88    3.63
   2  10   8   20.33    2.94
   2 -10   8   19.67    4.78
  -2 -10  -8    4.64    2.39
   2  10   8   22.54    2.66
  -2  10  -8   12.12    3.65
  -2  10  -8    6.77    2.47
   1 -16   2    9.60    2.67
   1 -16   2   10.22    3.29
  -1  16  -2    6.79    3.17
  -1  16  -2    4.30    2.04
   1  16   2    6.85    2.80
   1  16   2    8.33    2.07
  -5 -11   4   22.75    3.84
   5 -11  -4   35.22    2.79
  -5  11   4   30.67    4.21
   5 -11  -4   31.40    1.88
   5 -11  -4   30.01    2.70
   6  -1   4    0.67    1.50
   6   1   4    0.08    1.25
   0  12   8   46.00    3.34
   0 -12  -8   42.66    3.14
   0 -12   8   32.42    4.73
   0 -12   8   42.80    3.90
   6  -8   0   -0.03    1.41
  -6   8   0    0.26    1.62
   6  -8   0    0.89    2.00
  -6   8   0    0.34    3.93
   2 -13  -7    0.63    1.70
  -2  13   7    0.49    2.03
  -2  13   7    0.89    3.03
  -2 -13   7    0.42    3.62
  -2 -13   7    0.36    2.89
   2  13  -7    0.63    2.38
   2  -8   9   20.78    3.42
   2   8   9   28.89    3.10
   2  -8   9   21.43    4.75
  -2  -8  -9   23.38    2.44
  -2   8  -9   19.34    5.02
  -2   8  -9   10.45    2.71
   4 -13  -4    0.81    1.91
  -4 -13   4    2.01    3.34
   4 -13  -4    3.00    1.96
  -4  13   4    1.49    3.22
  -4  -8   9    5.75    2.30
  -4   8   9    4.53    2.40
  -4   8   9    6.69    1.46
  -4   8   9    3.50    2.98
   4  -8  -9    6.94    2.09
   2  15   3   28.28    3.31
  -2  15  -3   16.80    2.69
  -2  15  -3   19.92    3.59
   2 -15   3   31.77    3.12
   2 -15   3   31.95    4.46
   0 -16  -3    8.69    2.23
   0  16  -3    2.82    2.08
   0 -16   3    9.84    3.22
   0  16   3    6.69    3.08
   0 -16   3    8.90    2.96
   6  -8  -4  246.67    5.57
   6  -8  -4  229.75    4.51
  -2  -6  11   27.56    4.52
  -2   6  11   46.34    3.89
   2   6 -11   22.26    2.94
  -2  -6  11   44.10    3.37
  -2   6  11   41.40    2.11
  -2  -6  11   28.26    2.77
   2  -6 -11   42.06    3.21
   5 -11   1    2.09    1.66
   5 -11   1    1.83    2.18
  -5  11  -1    0.85    1.78
   3  -5   9    1.01    2.85
   3  -5   9   -0.20    4.15
  -3   5  -9   -0.21    2.12
  -3  -5  -9    0.27    1.56
   3   5   9    1.04    2.54
  -1 -15   5   -0.32    2.90
   1 -15  -5    0.27    1.91
  -1  15   5   -0.09    1.84
  -1  15   5    0.17    2.89
   1  15  -5   -0.48    2.25
  -1 -15   5    0.36    3.49
   2   5  10    2.05    2.46
   2  -5  10    0.18    2.38
  -2   5 -10    0.33    2.06
   2  -5  10    0.98    2.65
   2  -5  10    1.50    3.79
   2   5  10    3.05    2.57
  -2  -5 -10    1.32    1.75
   6  -5   3   28.27    2.30
   6  -5   3   29.43    2.61
  -1   9  10   40.18    3.29
  -1  -9  10   34.70    4.87
  -1   9  10   39.82    3.91
   1  -9 -10   42.54    3.13
  -1  -9  10   28.95    3.02
   1   9 -10   23.03    3.12
  -5  -5   9   19.47    4.25
  -5   5   9   24.91    2.66
  -5   5   9   38.16    2.07
  -5  -5   9   42.47    2.84
   5  -5  -9   39.79    3.02
  -7   1   2   76.91    4.92
   7  -1  -2   90.13    3.53
   7   0  -3  108.20    3.73
   0 -15   5    4.30    3.24
   0  15  -5    1.70    2.26
   0 -15   5    5.88    3.77
   0 -15  -5    4.19    2.05
   0  15   5    3.12    3.06
  -2  12   8  181.18    6.01
   2 -12  -8  130.68    4.05
  -2  12   8  180.57    4.91
  -2 -12   8  197.49    5.72
   2  12  -8   97.22    4.56
  -2 -12   8  123.27    5.96
   3 -15  -1    1.52    1.58
  -3  15   1    0.68    3.45
   3 -15  -1    1.23    2.00
  -3   8  -8   -0.29    2.04
   3  -8   8    2.45    2.87
   3   8   8    2.66    2.19
   3  -8   8    2.24    4.23
  -3   8  -8    1.95    3.97
   3   8   8    1.27    2.54
  -6   2  -4    1.69    5.42
   6  -2   4    1.71    1.60
   6   2   4    2.12    1.27
  -6   0   8  378.79    5.62
   4  -7   7   19.88    2.64
   4  -7   7   19.85    2.95
   4   7   7   23.94    2.95
  -4   7  -7   15.83    4.54
  -4   7  -7    9.61    2.22
   1 -16  -3    6.94    2.15
  -1  16   3    6.02    1.80
   1  16  -3    2.46    2.04
  -1 -16   3    6.28    2.76
  -1  16   3    6.13    3.07
  -5   7  -5   -0.15    2.10
   5   7   5    6.25    2.21
   5  -7   5    6.29    1.95
  -5   7  -5    5.23    4.04
   5  -7   5    7.19    2.28
  -2 -14   6  323.76    8.19
  -2  14   6  312.67    5.85
   7  -1  -3   23.20    2.42
   4 -11  -7   84.98    4.08
  -4  11   7   82.34    4.88
  -4 -11   7   87.30    3.74
   4 -11  -7   82.49    3.44
  -4   9  -6    1.94    2.09
   4  -9   6    4.64    2.61
   4   9   6    6.46    2.50
   4  -9   6    4.78    2.22
  -4   9  -6    4.20    4.00
  -6  -1   8   44.41    2.34
  -6   1   8   44.05    2.29
  -7   0   1  344.75   10.17
   3 -15   0   25.66    2.69
  -3  15   0   21.44    3.77
   3 -15   0   27.67    2.43
   3 -10   7   61.53    3.92
   3  10   7   79.50    4.07
  -3  10  -7   33.43    3.49
  -3  10  -7   46.81    4.67
  -3  15   2   26.55    3.85
   3 -15  -2   33.07    2.79
   3 -14   3   76.40    3.93
   3 -14   3   79.78    4.16
   3  14   3   83.09    4.10
  -1  11   9    0.65    3.13
  -1  11   9   -0.05    2.64
   1 -11  -9    1.07    2.00
  -1 -11   9   -0.85    3.79
   1  11  -9    0.27    2.33
  -1 -11   9    1.36    2.84
   7  -1  -1  107.10    3.31
  -7   1   1   77.73    6.45
  -3   5  11    4.43    2.81
   3   5 -11    4.08    2.31
   3  -5 -11    6.09    2.15
  -3  -5  11    2.36    3.54
  -3   5  11    4.01    2.85
  -3   5  11    6.27    1.60
  -3  -5  11    7.46    2.44
  -3  -5  11    5.71    2.43
  -7   2   2   -0.47    3.25
   7  -2  -2   -0.05    1.92
   4  -4   8    1.47    2.42
   4  -4   8    0.25    2.64
  -4   4  -8    0.70    1.97
   4   4   8    0.48    2.37
  -4 -12   6    0.04    3.37
   4 -12  -6    1.00    1.81
  -4 -12   6    0.86    2.02
   4 -12  -6    1.44    1.92
  -4  12   6    1.17    3.08
  -4  12   6    0.18    2.06
  -6  -5   7   19.02    1.91
  -6   5   7   13.29    2.35
   6  -5  -7   20.25    2.47
  -6  -5   7   11.07    3.72
  -4   6  10  100.10    4.22
  -4  -6  10  126.26    4.31
   4   6 -10   80.78    4.23
  -4   6  10  134.92    3.40
  -4   6  10  110.20    4.72
   4  -6 -10  124.49    4.71
  -4  -6  10   77.56    5.40
  -2  16   1   -0.91    3.82
  -2  16   1    0.46    1.89
   2 -16  -1    0.43    2.13
   3  -8 -10  148.82    5.08
  -3  -8  10   89.95    6.21
  -3   8  10  127.69    5.09
   3   8 -10   71.51    4.10
  -3   8  10  128.81    2.98
  -3  -8  10  144.39    4.82
  -5 -10   6    1.77    3.79
  -5  10   6    3.46    3.35
  -5 -10   6    5.67    1.82
   5 -10  -6    4.69    1.33
   5 -10  -6    5.27    2.02
   5 -10  -6    5.53    2.11
  -5  10   6    2.95    2.17
   1  -4  11   50.36    3.78
  -1  -4 -11   56.78    3.39
   1   4  11   67.97    3.75
   1  -4  11   58.53    3.56
   1   4  11   66.27    3.75
   1  -4  11   54.34    4.88
   0  -6 -11   56.12    3.40
   0   6  11   57.06    3.63
   0   6  11   63.00    3.89
   0  -6  11   54.67    3.67
   0  -6  11   48.56    3.77
  -2  16   0    3.34    2.28
  -2  16   0    5.02    3.37
   2 -16   0    7.94    2.40
  -3  14   5   23.96    3.79
   3 -14  -5   25.01    2.42
  -3  14   5   19.70    2.51
   3 -14  -5   23.85    2.70
  -3 -14   5   21.55    3.66
  -3 -14   5   23.12    2.65
   7  -2  -3    8.98    2.13
  -2   9  10    0.75    3.06
   2   9 -10    0.59    2.24
  -2  -9  10   -0.65    2.65
  -2  -9  10   -0.05    3.61
  -2   9  10   -0.63    2.76
  -4   0  11   -0.77    3.37
  -4   0  11   -0.36    1.71
  -4   0  11   -0.14    2.70
   4   0 -11    0.35    1.99
   5  -9  -7    5.18    2.18
  -5  -9   7    5.28    1.85
  -5   9   7    2.19    2.12
  -5  -9   7    1.95    3.62
  -5   9   7    5.38    3.18
   5  -9  -7    4.43    2.05
  -1   0  12   -0.47    3.40
  -1   0  12   -0.80    2.42
  -1   0  12   -0.20    2.05
  -1   0  12    0.18    2.58
  -6   2   8   58.53    2.49
  -6  -2   8   61.24    2.61
   2  13   6   47.96    3.56
  -2  13  -6   35.38    4.38
  -2  13  -6   20.53    2.91
  -2 -13  -6   26.55    2.98
   2 -13   6   41.41    4.95
   2 -13   6   39.59    3.63
   4 -13   2   34.05    2.65
  -4  13  -2   27.69    4.14
   1 -10   9   32.55    3.73
   1 -10   9   32.28    4.57
   1  10   9   35.46    2.92
  -1 -10  -9   36.51    2.77
   7   0  -4    0.14    1.93
   3 -10  -9   48.57    3.45
  -3 -10   9   24.13    4.71
   3  10  -9   22.18    2.93
  -3 -10   9   50.40    3.57
  -3  10   9   35.35    3.20
   3 -10  -9   42.56    2.64
  -3  10   9   39.59    3.91
   4 -10  -8   13.08    2.34
  -4 -10   8    8.37    3.88
   4 -10  -8   17.59    2.45
  -4  10   8   16.42    3.75
  -4 -10   8   16.62    2.67
   6  -3   4    6.97    1.91
  -6   3  -4    7.68    5.15
  -4  -1  11   33.57    2.67
  -4  -1  11   27.05    3.11
  -4   1  11   31.14    2.29
  -4   1  11   19.96    3.86
  -4  -1  11   18.48    3.89
   4  -1 -11   28.89    2.96
   4   1 -11   22.82    2.64
  -4   1  11   28.08    3.50
   5  -5   6   44.57    3.15
   5  -5   6   42.51    2.78
  -5   5  -6   48.25    6.27
   1   1 -12    7.47    2.39
  -1  -1  12    8.89    2.76
  -1   1  12   10.32    2.08
  -1  -1  12   10.84    2.33
  -1   1  12    7.04    2.89
  -1  -1  12    5.24    3.57
  -1   1  12    9.82    2.66
   6  -7   2   23.56    2.65
  -6   7  -2   20.25    4.50
   6  -7   2   23.66    2.17
  -7   2   1   62.23    4.89
   7  -2  -1   67.69    2.86
   7  -1  -4   53.84    3.03
   7   1  -4   59.23    3.18
  -2   0  12   58.46    3.00
  -2   0  12   48.71    3.74
   2   0 -12   51.63    3.57
   1 -14   6    6.01    3.78
  -1 -14  -6    6.59    1.99
   1  14   6    5.64    3.05
  -1  14  -6    2.60    2.44
   1 -14   6    7.59    3.19
  -5   0  10   -0.18    3.70
  -5   0  10    0.37    1.65
  -5   0  10   -0.41    2.15
   5   0 -10   -0.22    1.82
   0  -9  10    0.58    2.84
   0   9  10    3.03    2.36
   0   9  10    1.60    2.90
   0  -9  10    2.92    4.02
   0  -9 -10    3.08    1.98
   0  -9  10    1.66    3.01
   0   9 -10    1.41    2.47
   2 -16  -2    3.68    2.02
  -2  16   2    4.31    3.27
  -2  16   2    2.20    1.93
   5 -10   3   54.13    3.12
   5 -10   3   53.71    3.41
   1  13   7   44.98    3.29
   1  13   7   37.31    3.80
  -1 -13  -7   40.14    3.01
   1 -13   7   32.50    4.43
   1 -13   7   39.88    4.31
  -2 -14  -5    5.93    1.94
   2 -14   5    5.87    4.20
   2 -14   5    5.50    2.80
  -2  14  -5    3.31    3.53
   2  14   5    5.13    2.92
   6  -8   1   13.96    1.89
   6  -8   1   13.92    2.42
  -6   8  -1   12.37    4.23
   6  -9  -2   26.72    2.00
  -6   9   2   24.96    3.94
   6  -9  -2   31.85    2.79
  -2   1  12   55.78    4.01
  -2   1  12   65.66    3.00
  -2  -1  12   58.42    4.39
  -2  -1  12   64.19    3.26
   2  -1 -12   63.42    3.76
   2   1 -12   51.99    3.45
  -5   1  10   34.09    4.25
  -5  -1  10   35.34    4.68
   5  -1 -10   42.59    3.00
  -5   1  10   56.11    2.60
  -5  -1  10   46.10    3.00
  -5   1  10   44.80    3.26
   3 -15   1    0.15    2.11
   3 -15   1    0.03    2.18
  -3  15  -1   -1.00    3.54
  -3  15  -1    0.02    2.12
  -7   3   2   51.01    4.51
   7  -3  -2   66.57    3.25
   1  -8  10   -0.50    2.87
   1  -8  10    0.02    4.04
   1  -8  10    0.33    2.21
  -1   8 -10    0.02    2.43
  -1  -8 -10    0.70    1.81
   1   8  10    1.04    2.43
   1   8  10   -0.30    2.66
  -2  12  -7   10.26    2.62
  -2 -12  -7   27.83    2.65
   2  12   7   23.55    3.25
   2 -12   7   20.16    3.51
   2 -12   7   19.65    4.82
  -2  12  -7   14.20    3.85
  -4  -2  11    3.30    1.89
  -4  -2  11    2.17    3.61
  -4   2  11    3.31    2.81
  -4   2  11    3.07    1.63
  -4  -2  11    1.96    2.48
   4   2 -11    2.82    2.13
   4  -2 -11    2.77    1.99
  -4   2  11    1.88    3.56
   5   9   4  104.10    3.88
   5  -9   4   89.36    3.99
  -1  16  -3   21.90    2.83
  -1  16  -3   34.44    3.91
   1 -16   3   43.05    3.57
   1  16   3   32.21    3.57
   1  16   3   41.53    2.79
   1 -16   3   50.36    4.20
   3 -15  -3   15.44    2.55
   3 -15  -3   19.29    2.46
  -3  15   3   20.72    4.09
   0  11   9   22.34    3.51
   0 -11  -9   24.28    2.73
   0 -11   9   11.24    4.30
   0  11  -9    9.78    2.61
   0  11   9   23.34    2.88
  -2  16  -1    3.70    2.29
   2 -16   1    9.86    2.51
  -2  16  -1    5.30    3.42
   2 -16   1   10.24    3.79
  -1   2  12   24.79    2.27
   1   2 -12   21.19    3.02
  -1   2  12   24.97    2.91
  -1  -2  12   19.64    2.93
  -1  -2  12   23.44    2.64
  -1  -2  12   15.06    3.70
   1  -7 -11   28.39    2.75
   1   7 -11   14.94    2.80
  -1  -7  11   18.33    4.46
  -1  -7  11   28.76    3.30
  -1   7  11   29.97    3.60
  -1  -7  11   22.60    2.92
  -1   7  11   31.27    3.21
  -2  11   9  105.92    5.51
  -2 -11   9  126.86    4.81
  -2 -11   9   83.11    5.47
  -2  11   9  122.35    4.70
   2 -11  -9   84.57    3.47
   2  11  -9   69.55    4.21
  -6  -7   6   26.84    4.15
  -6   7   6   34.62    3.73
  -6  -7   6   49.25    2.24
   6  -7  -6   46.16    3.04
   6  -9  -1   12.64    2.31
   6  -9  -1   12.73    1.76
  -6   9   1    9.26    4.01
  -7   0   0   -0.31    4.66
   7   0   0    0.81    1.50
   5 -12  -2   19.93    1.87
   5 -12  -2   20.78    2.50
  -5  12   2   13.85    2.17
  -5  12   2   15.73    3.80
  -5 -11   5    2.59    3.80
   5 -11  -5    6.12    2.12
   5 -11  -5    5.64    1.44
  -5  11   5    6.64    3.50
   5 -11  -5    5.65    2.16
   7  -3  -3   10.99    2.20
  -7   3   3    8.27    3.31
   7  -2  -4   14.54    2.30
   6  -8  -5    3.03    2.05
  -6   8   5    1.93    3.31
  -6  -8   5    2.57    1.33
  -5  12   1   78.29    5.10
  -5  12   1   54.83    3.04
  -6   9   3   45.76    4.28
   6  -9  -3   51.91    2.46
  -6   3   8    4.85    2.17
  -6  -3   8    4.89    1.61
  -6  -3   8    5.27    3.75
  -7   1   0   16.09    4.85
   7   1   0   13.98    1.79
   7  -1   0   16.76    1.92
   3  -6   9  232.63    6.37
  -3  -6  -9  237.77    5.26
   3  -6   9  220.82    7.01
   3   6   9  277.26    6.68
  -3   6  -9  198.89    9.03
   3   6   9  302.50    6.78
  -2  15   5   35.00    4.11
  -2 -15   5   39.79    3.39
  -2  15   5   34.33    2.70
   2 -15  -5   32.02    2.67
   4 -14  -1    3.98    2.22
  -4  14   1    2.18    2.03
  -4  14   1    2.94    3.82
   4 -14  -1    4.53    1.81
   2   6  10  111.36    4.26
  -2  -6 -10  104.41    3.93
   2  -6  10   77.38    5.24
   2  -6  10   69.76    3.91
   2  -6  10  100.92    4.55
   2   6  10  114.79    4.56
  -2   6 -10   54.98    3.70
   6  -6   3    3.88    1.82
  -6   6  -3    1.75    4.14
   6  -6   3    3.27    2.07
  -2  -2  12    6.66    3.67
   2  -2 -12    5.13    2.32
  -2   2  12    5.40    1.73
  -2  -2  12    6.33    2.28
  -2   2  12    4.34    2.64
  -2  -2  12    4.25    3.63
   2   2 -12    2.82    2.16
  -5  -2  10   33.07    2.44
  -5   2  10   27.54    3.79
   5  -2 -10   29.50    2.70
  -5   2  10   35.34    2.23
  -5   2  10   32.55    3.09
   7  -3  -1    2.61    2.05
  -7   3   1    2.17    3.52
   7  -3  -1    2.62    1.59
  -5  -6   9   51.59    5.15
  -5   6   9   58.66    3.41
  -5  -6   9   83.68    3.49
   5  -6  -9   74.13    3.63
  -5   6   9   85.50    2.83
  -5   8   8    1.13    2.14
  -5  -8   8    0.49    1.84
   5  -8  -8    1.38    1.94
  -5  -8   8    1.39    3.84
   5  -8  -8    0.45    1.99
  -5   8   8    0.17    3.66
   4 -13  -5    9.43    2.51
   4 -13  -5    5.51    2.10
  -4  13   5    3.80    2.11
  -4 -13   5    3.84    3.49
  -4  13   5    5.03    3.69
   4 -14  -2   43.94    2.51
   4 -14  -2   38.84    2.97
   5 -11   2  253.96    5.93
  -5  11  -2  239.90    8.03
   2   7 -11    0.56    2.61
  -2  -7  11   -0.21    2.36
  -2  -7  11    0.31    3.91
   2  -7 -11   -0.80    2.08
  -2  -7  11    0.70    2.19
  -2   7  11    0.73    3.08
   4   5   8   78.27    3.62
  -4   5  -8   63.92    7.39
   4  -5   8   60.79    3.85
   4  -5   8   61.26    3.80
   1 -15   5   14.56    3.25
  -1 -15  -5   14.14    2.33
   1 -15   5   16.03    3.95
   1  15   5   12.35    3.19
  -1  15  -5    5.49    2.42
  -6   4  -4   16.84    5.35
   6  -4   4   19.22    2.50
   6  -4   4   18.30    2.17
   5 -12  -3   26.25    2.72
  -5  12   3   20.08    4.14
   5 -12  -3   25.49    1.93
   5 -12  -3   22.89    2.60
   1  -5  11    3.16    2.78
   1  -5  11    2.55    2.77
   1   5  11    4.21    2.68
  -1   5 -11    2.34    2.33
  -1  -5 -11    3.71    1.95
   1   5  11    4.01    2.68
   1  -5  11    1.40    3.94
   7  -2   0   32.47    2.20
   7   2   0   28.02    1.95
  -7   2   0   30.32    4.82
   5   0   7  365.07    6.30
   0 -16   4   19.45    3.55
   0 -16  -4   17.85    2.65
   0  16   4   12.43    3.19
   0 -16   4   20.38    3.79
  -4   3  11  227.78    5.85
  -4   3  11  268.87    4.83
  -4  -3  11  277.22    5.66
  -4   3  11  198.13    6.81
   4  -3 -11  235.33    6.08
   4   3 -11  175.15    5.41
  -4  -3  11  159.20    6.76
   1 -12   8    0.70    3.93
   1  12   8    0.53    2.12
  -1  12  -8    0.32    2.65
   1  12   8   -0.07    2.91
  -1 -12  -8   -0.17    1.87
   4 -14   0  136.97    3.88
   4 -14   0  130.35    4.50
  -1  -3  12  106.76    4.50
  -1   3  12  124.87    4.33
  -1   3  12  112.19    4.99
  -1  -3  12   75.48    4.95
  -1  -3  12  136.30    4.58
   1   3 -12   92.32    4.89
  -1   3  12  127.51    3.63
  -1  16   4    4.47    1.93
  -1 -16   4    6.00    3.02
  -1 -16   4    7.27    3.46
  -1  16   4    3.67    3.30
   1 -16  -4    6.89    2.29
   1  16  -4    2.30    2.33
   5 -12   0   11.99    1.93
  -5  12   0    4.74    2.07
   0  17   0   -0.74    3.04
   0  17   0    0.75    1.92
   3  -6 -11  321.16    7.14
  -3  -6  11  198.87    7.20
  -3   6  11  344.03    8.11
   3   6 -11  205.59    6.36
  -3   6  11  291.34    4.48
  -3   6  11  326.91    7.13
   5  -1   7   59.96    3.13
   5   1   7   39.25    3.04
   7  -3  -4  167.60    4.65
   0   0  12   50.14    2.93
   0   0  12   56.32    3.95
   0   0  12   50.02    3.32
  -4  12  -4   21.71    4.43
   4  12   4   29.29    2.90
   4 -12   4   23.55    2.50
   4 -12   4   26.79    3.05
  -6   6   7    0.22    2.06
  -6  -6   7    0.55    1.56
  -6  -6   7    0.98    3.56
   7   0  -5  232.91    5.42
  -4  11  -5  107.86    5.88
   4  11   5  172.13    5.18
  -4  11  -5   76.58    4.26
   4 -11   5  167.06    5.96
   4 -11   5  130.70    4.55
  -2  16   3    4.32    3.45
   2 -16  -3    3.89    2.07
   2  16  -3    1.67    2.21
   6  -9   0   27.02    2.12
  -6   9   0   24.20    4.78
   6  -9   0   29.30    2.82
   2  -9   9   86.95    4.68
  -2  -9  -9  101.12    4.01
   2  -9   9   77.19    5.79
  -2   9  -9   69.70    6.08
  -2   9  -9   42.38    3.69
   2   9   9  111.80    4.57
   2   9   9  107.06    4.79
   7  -4  -2  109.82    3.96
  -7   4   2   82.59    5.20
   0   1  12  173.10    5.62
   0  -1 -12  130.99    4.84
   0  -1  12  180.68    4.89
   0   1  12  180.65    4.62
   0  -1  12  155.00    4.73
   0   1 -12  135.15    5.24
   0   1  12  149.60    4.56
   0  -1  12  181.19    6.16
   0  -1  12  124.08    5.84
   4  -9  -9  218.69    6.09
  -4  -9   9  137.40    6.51
  -4   9   9  153.46    5.04
  -4  -9   9  245.79    5.89
  -4   9   9  190.47    6.08
   7  -1  -5    2.47    2.22
   7   1  -5    1.54    1.98
  -2  15  -4   -0.42    3.28
  -2 -15  -4    1.03    1.88
   2  15   4   -0.31    2.92
   2 -15   4   -0.36    2.62
   3  13   5   59.58    3.78
   3 -13   5   57.06    4.63
  -2  -3  12    2.94    3.64
   2   3 -12    2.60    2.30
  -2   3  12    5.39    1.91
  -2   3  12    5.26    2.62
  -2  -3  12    5.92    2.50
  -2  -3  12    3.45    2.91
  -5  -3  10   81.50    5.47
   5  -3 -10  120.15    4.50
  -5   3  10   95.28    4.02
  -5  -3  10  121.37    3.78
   4  -8   7   59.68    3.74
  -4   8  -7   52.10    5.55
   4   8   7   64.26    3.53
   4  -8   7   61.04    3.78
   0  17  -1   27.26    2.98
   0  17   1   44.76    3.92
   0  17   1   30.09    2.78
   0  17  -1   46.44    4.01
  -6   9   4    6.77    3.62
   6  -9  -4    9.25    1.67
   5  -8   5   63.67    3.56
   5   8   5   76.56    3.91
  -7   4   3   82.39    5.41
   7  -4  -3  152.79    4.57
   1 -14  -7  338.37    7.38
  -1  14   7  341.01    6.44
  -3   0 -10   -0.42    1.96
   3   0  10   -0.95    2.76
   4 -14  -3    5.38    2.09
   4 -14  -3    3.79    2.09
  -4  -7  10    7.64    2.33
   4   7 -10    3.92    2.39
   4  -7 -10    7.21    2.21
  -4   7  10    6.22    3.08
  -4   7  10    8.29    1.47
  -4   7  10    5.68    2.54
   3  12   6   96.73    4.17
   3 -12   6   84.80    5.28
   5  -6   6    1.74    2.33
   5  -6   6    1.14    2.01
  -6  -4   8   12.46    1.82
  -6   4   8   12.02    2.44
   0  -7 -11   39.65    3.08
   0   7  11   44.38    3.52
   0  -7  11   43.93    3.88
   0  -7  11   28.70    3.29
   0  -7  11   25.68    4.29
   5  -2   7  218.68    5.19
   5   2   7  213.38    5.73
   2  16   2    5.58    2.89
   2 -16   2    7.36    3.93
  -2  16  -2    3.35    3.52
   2 -16   2    7.28    3.08
   3  -9   8  134.89    5.18
  -3   9  -8  112.29    6.67
  -3  -1 -10    0.17    1.84
  -3   1 -10    0.39    2.09
   3  -1  10    2.68    4.12
   3   1  10    0.43    2.63
  -3  13   7    1.03    3.26
  -3 -13   7    1.55    3.75
   3 -13  -7    0.14    1.89
  -3 -13   7    0.57    2.49
  -3  15  -2    0.98    3.44
   3 -15   2    0.96    2.25
  -3  15  -2    0.26    1.95
   3 -15   2    1.73    2.77
  -7   3   0  341.19    9.14
   7  -3   0  386.56    6.58
   7  -4  -1    1.52    2.11
  -7   4   1    1.01    3.82
  -1 -13   8    0.45    4.08
   1  13  -8    1.33    2.48
   1 -13  -8    2.05    2.12
  -1  13   8    1.59    2.18
  -1 -13   8    1.95    2.99
   2  11   8   11.24    2.33
  -2  11  -8    4.09    2.65
  -2  11  -8    5.13    3.96
  -2 -11  -8   11.67    2.21
   0   2 -12    1.68    2.25
   0   2  12    2.17    2.62
   0  -2  12    2.25    2.14
   0  -2  12    3.29    2.21
   0  -2 -12    2.72    2.12
   0  -2  12    2.23    2.72
   0  -2  12    3.03    3.76
   7  -2  -5    0.28    2.11
  -1  10  10    3.00    3.11
   1 -10 -10    2.20    2.09
  -3 -15   4   45.08    3.96
   3 -15  -4   50.58    3.04
  -3 -12   8   83.95    5.89
   3  12  -8   64.41    4.02
  -3  12   8  123.39    5.46
   3 -12  -8  114.24    3.71
  -3 -12   8  112.85    4.34
  -2   0 -11    0.81    2.06
   0  14   7    3.28    2.15
   0 -14   7    3.67    3.16
   0 -14  -7    5.40    2.13
   0 -14   7    2.01    3.89
  -1  17   0  271.60    7.70
   1  17   0  165.99    5.19
   1 -17   0  289.97    6.17
  -1  17   0  167.84    5.27
   7   0   1  433.05    6.27
  -4  13  -3   48.47    3.27
   4 -13   3  115.78    4.03
   3   0 -12   -0.90    2.15
  -3   0  12    0.80    3.40
  -3   0  12    0.48    2.57
  -3   0  12    0.66    1.79
  -2   1 -11    0.20    2.21
  -2  -1 -11    0.02    1.91
  -3   2 -10   27.26    2.99
   3  -2  10   46.84    5.01
  -3  -2 -10   36.26    2.85
   3   2  10   58.05    3.74
  -1  15   6   32.47    2.52
  -1 -15   6   39.89    3.81
   1 -15  -6   41.67    3.22
  -1 -15   6   35.80    4.59
   5 -12  -4   52.26    2.33
   5 -12  -4   47.47    3.37
  -5  12   4   45.05    4.55
   5 -12  -4   54.71    3.26
  -1  17   1   19.19    3.56
   1 -17  -1   19.91    2.63
  -1  17   1   14.55    2.30
   1  17  -1   10.07    2.33
  -4   4  11   18.78    1.88
   4  -4 -11   19.34    2.65
  -4   4  11   15.39    2.90
   4   4 -11   14.31    2.47
  -3  14  -4    4.87    3.64
   3 -14   4    8.26    3.57
   3  14   4    7.59    2.87
  -3  14  -4    2.59    2.24
  -3  -9  10   61.48    3.87
  -3   9  10   59.40    4.26
  -3   9  10   60.24    2.32
  -1  -4  12    7.50    3.08
  -1  -4  12    3.75    3.75
  -1   4  12    7.99    2.81
  -1  -4  12    7.95    2.58
  -4  10  -6    1.62    4.11
  -4  10  -6    1.19    2.18
   4  10   6    3.97    2.72
   4 -14   1   58.00    3.09
   4 -14   1   54.21    3.38
   7  -1   1   20.85    2.04
  -7   1  -1   17.91    5.49
   7   1   1   22.12    1.91
   6  -8   2  230.60    5.57
  -6   8  -2  181.07    7.29
   7  -4  -4   -0.24    1.98
   3   1 -12    3.81    2.29
  -3   1  12    3.59    3.47
  -3   1  12    3.10    2.53
  -3   1  12    4.74    1.92
  -3  -1  12    3.65    2.58
  -3  -1  12    2.61    3.51
   6  -5   4    0.36    2.14
   0 -17   2    7.54    2.98
   0  17   2    8.06    3.09
   0  17   2    6.59    2.17
   0  17  -2    3.31    2.25
   5   3   7   17.19    3.06
   5  -3   7   17.25    2.33
   6   0   5   -0.12    1.55
   5 -12   1  107.92    3.77
  -5  12  -1   47.75    3.08
   0 -15   6  124.39    6.06
   0 -15   6  132.77    5.42
   0 -15  -6  137.00    4.95
  -3 -14   6   75.89    4.91
  -3 -14   6   91.99    3.95
   0 -13   8   17.00    3.60
   0  13   8   14.78    2.70
   0 -13  -8   16.34    2.54
   0 -13   8   13.95    4.29
  -2  -4  12    0.22    2.64
  -2   4  12    1.08    1.60
  -2   4  12   -0.06    2.78
  -2   4  12   -1.67    2.63
  -2  -4  12   -0.18    4.06
  -5   4  10    1.20    2.32
   5  -4 -10    0.76    2.11
   1 -17   1    3.26    2.60
   1  17   1    0.87    2.86
  -1  17  -1    0.63    3.17
   1  17   1    1.30    2.10
   6  -1   5   32.09    2.55
   6   1   5   36.46    2.33
   4  -6   8    5.74    2.90
  -4   6  -8    2.38    2.25
   4  -6   8    6.48    3.09
   4   6   8    7.95    2.58
   0  -3  12    9.52    3.12
   0   3  12   10.57    2.97
   0  -3  12   12.56    2.68
   0  -3 -12    9.14    2.40
   0  -3  12    6.43    3.93
  -2  -2 -11   -0.02    1.99
   2  -2  11   -0.02    3.62
  -2   2 -11    0.08    2.22
   7  -3  -5   13.18    2.34
  -3   7  -9   27.02    6.09
   3   7   9   33.37    2.95
   3  -7   9   30.13    3.71
  -3  11  -7   66.88    4.02
  -3  11  -7   90.88    5.42
   2  10 -10   -0.30    2.33
  -2  10  10   -0.02    3.30
  -5 -10   7    1.52    3.82
  -5  10   7   -0.04    3.29
   5 -10  -7    2.65    2.07
  -5 -10   7    3.61    1.86
   5 -10  -7    2.49    2.04
   2   7  10  148.89    4.96
  -2  -7 -10  134.78    4.48
   6  -7   3    5.23    2.23
  -1  -8  11   36.62    3.16
  -1   8  11   55.81    4.01
  -6   8   6   10.82    3.85
  -6  -8   6    5.16    3.75
  -6  -8   6   11.57    1.75
   7   2   1    5.21    1.42
  -7   2  -1    5.26    4.90
  -1  -6 -11  307.71    6.80
   1  -6  11  313.20    6.86
   1  -6  11  258.59    6.62
   1  -6  11  237.87    7.79
   5  -7  -9   21.28    2.74
  -5   7   9   14.20    2.60
  -5  -7   9   18.81    2.39
   1  16   4    2.66    3.08
   1 -16   4    3.13    2.94
   1 -16   4    3.56    3.64
  -1 -16  -4    4.12    2.14
  -7   5   2   27.25    4.23
   7  -5  -2   42.05    3.39
  -4  12   7   47.32    4.43
   4 -12  -7   48.95    2.92
  -4 -12   7   47.24    3.27
  -3   2  12   57.33    3.87
  -3  -2  12   51.85    3.64
   2  14  -7   -0.22    2.58
  -2  14   7    0.28    1.99
  -2 -14   7   -0.20    3.01
  -2 -14   7    0.77    3.90
  -5  11   6  154.04    6.06
   5 -11  -6  162.58    3.46
  -7   4   0    5.33    3.91
   7  -4   0    6.81    2.20
  -7   5   3    5.02    3.75
   7  -5  -3    6.13    2.18
   1  17  -2   34.33    3.14
   2  13  -8    3.58    2.48
  -2 -13   8    3.54    3.76
  -2 -13   8    7.62    3.00
   4 -14  -4    8.25    2.21
  -4 -14   4    6.90    3.53
  -3  -3 -10   77.45    3.60
   3  -3  10   79.81    5.33
  -1  -9 -10   46.27    3.14
   1   9  10   47.90    3.49
  -6  -5   8   17.93    2.07
  -6   5   8   12.54    2.52
   0 -10  10   38.00    3.50
   0 -10 -10   57.12    3.52
  -1 -11  -9   51.12    3.32
   1  11   9   51.53    3.32
  -2  16   4    8.40    2.01
   2  16  -4    6.64    2.58
   2 -16  -4   13.83    2.29
   6  -2   5   44.96    2.82
   6 -10  -2    2.48    1.54
  -6  10   2    2.39    3.76
  -6  10   2    0.92    1.83
   3 -11  -9    1.68    2.08
  -3 -11   9    1.08    2.46
  -3  11   9    1.70    3.22
   3  11  -9    0.71    2.41
  -4  11   8    3.80    3.56
   4 -11  -8    3.46    2.00
  -4 -11   8    1.04    3.76
  -4 -11   8    3.31    2.47
  -6   9   5   58.13    4.53
   6  -9  -5   63.88    2.72
   7  -5  -1   49.80    3.12
  -7   5   1   41.00    4.82
  -3   7  11    0.80    3.20
   3   7 -11    0.11    2.50
  -3   7  11   -0.10    1.41
  -2   8  11   29.46    3.88
  -6  -7   7    0.48    1.58
  -6   7   7   -0.01    2.16
   4  -1   9   92.20    4.82
  -5  10  -4   25.54    2.88
   5  10   4   71.51    3.66
  -6  10   1   67.34    5.11
   6 -10  -1   82.19    3.05
  -5  11  -3    0.12    2.08
  -5   9   8  241.14    7.76
   5  -9  -8  239.31    6.25
  -5  -9   8  258.91    5.33
  -4 -13   6   -0.75    3.52
  -4  13   6    1.17    3.53
   4 -13  -6    0.96    1.95
   2  -3  11   93.65    5.36
   2   3  11  121.15    4.79
  -2  -3 -11  100.17    4.18
   2  -3  11  115.19    4.37
   7  -1  -6   51.74    3.21
  -6  10   3   38.88    4.27
   6 -10  -3   42.28    2.32
  -7   3  -1    1.08    4.06
   7   3   1    1.00    1.27
   5   4   7    6.00    2.59
   5  -4   7    5.36    2.08
  -3  -3  12   83.57    4.20
  -3  -3  12   70.20    5.18
  -4   5  11  122.65    4.83
   4   5 -11   79.44    4.21
   5   7   6   11.57    2.49
   5  -7   6   11.38    2.69
  -5   7  -6    4.77    2.07
  -1  -5  12    7.91    3.20
  -1   5  12    9.39    3.08
  -2  16  -3    4.41    3.28
   2  16   3    5.85    3.10
   2 -16   3    6.44    4.22
   2 -16   3    6.86    2.92
  -2 -15   6   42.87    3.57
  -2 -15   6   39.28    4.56
  -2  15   6   34.39    2.74
  -7   5   4   45.78    4.49
   0  -4  12   12.25    2.86
   0  -4  12    5.89    4.06
   0   4  12   15.28    3.24
   0  -4  12    9.08    2.93
   1  17   2   30.07    3.57
  -1  17  -2   29.34    3.92
   1  17   2   26.89    2.70
   1 -17   2   37.10    3.31
   4  -2   9   85.30    4.80
  -1 -16   5   35.23    3.74
  -1  16   5   35.64    2.71
  -1 -16   5   45.08    4.61
   0 -16  -5    8.80    2.35
   0 -16   5    8.67    3.57
   0 -16   5    8.89    3.82
  -6   2   9   -0.55    2.14
   3 -16  -1   77.08    3.69
  -4   8  10   41.66    3.93
  -4   8  10   41.72    2.19
  -7  -2   6   87.72    2.89
   0 -12  -9    1.42    2.23
   0  12   9    1.83    2.52
   3  15   3    9.15    2.98
   3 -15   3    9.85    3.63
  -2  -5  12   11.40    2.82
  -2   5  12   13.45    3.31
  -2   5  12   13.49    1.85
   5  -5 -10  128.38    4.70
  -5   5  10  106.71    4.26
  -2 -14  -6  137.41    4.71
   2 -14   6  115.12    6.41
  -2 -12   9    5.64    2.84
   2  12  -9    3.03    2.60
   4 -14   2    6.44    2.09
  -4  14  -2    2.72    2.10
   0 -17   3    8.82    3.22
   0  17   3    8.18    2.17
   0   8  11   22.36    3.42
   0  -8 -11   23.31    2.70
   0  -8  11   15.63    3.31
  -5  12   5   30.19    4.29
   5 -12  -5   33.10    2.91
  -5 -12   5   24.46    4.50
   5 -12  -5   32.58    1.95
   3  -4  10   42.52    3.65
   3  -4  10   40.00    4.87
  -3  -4 -10   42.80    3.10
   6  -6   4   60.10    3.45
  -4   9  -7    5.31    2.52
  -5   9  -5    7.87    2.25
   5   9   5   21.42    2.85
   3 -16   0    0.69    2.31
   3 -15  -5    1.36    2.03
  -3 -15   5    2.15    3.30
   3 -16  -2   28.92    2.81
  -2  13  -7    5.35    3.83
  -2 -13  -7    7.09    2.08
  -6  10   0    0.06    1.87
   2  10   9   31.21    3.13
  -2 -10  -9   26.76    2.59
  -7   5   0    3.68    4.16
   7  -5   0    5.18    2.21
   1  17  -3    8.03    2.42
  -5  13   2    1.62    1.97
   5 -13  -2    2.45    1.68
  -1 -14  -7  149.69    4.88
   1 -14   7  146.13    6.71
  -4 -10   9    4.79    2.58
   4 -10  -9    6.11    2.10
  -4  10   9    4.03    3.32
   5 -13  -1  201.62    4.59
  -5  13   1   98.01    4.09
  -5  12  -2   12.88    2.39
   6 -10  -4    0.52    1.51
  -6  10   4    0.21    3.62
  -7   6   2    0.63    3.94
   2  -4  11    3.62    3.83
   2  -4  11    6.74    2.85
  -2  -4 -11    5.55    2.18
  -2   4 -11    2.19    2.33
   1   0  12   -0.04    2.26
  -4   3  -9   58.85    4.16
   4  -3   9  204.10    6.33
   1 -15   6   79.65    5.57
  -1 -15  -6   79.57    3.87
   7   1   2   85.17    2.98
  -7   1  -2   85.60    7.32
  -7   4  -1  139.51    7.09
   7   4   1  120.65    3.34
  -7   6   3    1.36    3.86
  -2  15  -5   -1.03    3.62
  -2 -15  -5    0.08    1.87
   2 -15   5   -0.04    4.52
   4  -7   8   12.44    3.17
  -4   7  -8    5.44    2.42
  -6   3   9   82.05    3.80
  -3  -4  12    1.20    2.46
  -3   4  12    2.31    1.60
  -3  10  -8   43.88    3.67
  -3  10  -8   63.15    5.50
  -1  -1 -12   22.56    2.80
   1   1  12   30.13    3.26
  -7  -3   6  437.05    5.93
   2 -17  -1   96.45    4.00
  -6  -6   8   40.23    2.52
  -6   6   8   25.19    2.94
  -1  -7 -11   -0.42    2.07
   1  -7  11    0.56    2.76
   2 -17   0    6.29    2.52
   4  12   5   64.19    3.54
  -4  12  -5   28.02    3.42
   5 -13  -3   54.91    2.55
  -5  13   3   35.11    2.88
  -7   6   1    8.84    4.19
  -4 -14   5    2.12    3.49
   4 -14  -5    3.09    2.03
  -3   8  -9    1.31    2.44
   3   8   9    1.61    2.38
  -3   8  -9   -0.93    5.31
   1  13   8    7.95    2.57
  -1 -13  -8    7.92    2.23
  -2  -8 -10  360.20    7.21
  -5  13   0    2.36    2.07
   5 -13   0    3.86    1.87
  -7   2  -2    3.17    5.84
   7   2   2    5.06    1.37
   3 -16   1   51.91    3.84
   3 -16   1   47.06    3.45
  -5  -8   9   36.23    2.80
   5  -8  -9   35.86    3.14
   0  -5  12   19.15    3.35
   0   5  12   18.93    3.13
  -4  13  -4   38.37    3.42
   4  13   4   97.40    4.21
  -7  -5   5    8.53    1.62
   1  -2  12   83.40    5.23
   1   2  12  109.03    4.64
  -1  -2 -12   89.84    4.36
   1  -2  12  114.51    4.49
   4 -15  -1   30.15    2.33
  -3  10  10   -1.45    3.36
   3  10 -10    0.31    2.35
   3 -16  -3   56.25    3.32
   2 -17  -2   30.26    2.85
   4   6 -11    3.81    2.59
  -1  -6  12   37.54    3.56
  -1   6  12   49.79    4.04
  -1   9  11    2.09    3.40
  -6   9   6  103.27    5.49
  -2 -12  -8  444.24    7.71
  -7   6   4    3.18    3.95
  -3   5 -10   12.82    2.61
   3  -5  10   25.14    3.46
  -2  16   5   58.06    3.30
  -2 -16   5   67.11    4.90
  -1  17  -3    0.36    3.50
   1 -17   3    0.34    2.92
   2 -17   1  106.30    4.65
  -4  11  -6    0.49    2.28
  -3   8  11  261.78    6.84
  -6  -8   7  101.82    3.23
  -6   8   7   73.33    4.85
  -4   4  -9   34.84    3.03
   5   0 -11    0.52    2.00
   4 -15   0   23.96    2.35
  -2   6  12   72.45    4.34
  -2  -6  12   53.28    3.67
  -6   4   9    9.45    2.46
   1 -16   5    6.03    4.03
  -1 -16  -5    2.99    2.14
  -7  -4   6   67.70    2.63
   5  -1 -11    6.69    2.26
  -5   1  11    5.39    2.55
  -7   3  -2    1.55    5.35
   7   3   2    2.06    1.25
  -3 -13   8   -0.63    2.66
   3 -13  -8   -0.46    1.90
  -2   9  11  231.37    6.76
  -2  -5 -11   76.62    3.74
   1  -3  12    9.57    4.13
   1   3  12   13.12    2.90
   1  -3  12   11.87    2.77
  -1 -10 -10   32.89    2.86
  -5 -11   7  133.27    3.96
  -5  11   7   99.02    5.21
  -5   8  -6    0.28    2.13
   3 -14  -7   10.43    2.20
  -3 -14   7   10.97    2.85
  -3 -14   7    8.63    3.91
   7  -5   1    8.29    2.35
  -7   5  -1    8.10    4.36
  -7   6   0   -0.13    4.26
  -1 -15   7   13.96    3.43
  -1 -15   7   10.83    4.43
  -5 -13   4    0.81    3.59
   6   7   4   45.07    3.16
  -6  10   5   49.49    4.56
   6 -10  -5   59.63    2.61
  -4   0  12    6.90    2.97
   0 -17   4   34.68    4.32
   2 -16   4    1.72    4.49
  -2  16  -4   -0.72    3.55
  -5   2  11   64.49    3.86
   5  -2 -11   70.31    3.83
  -4   1  12    4.41    3.73
  -4  -1  12    5.04    2.89
  -4   1  12    6.65    3.20
   0 -11  10   22.17    3.37
  -5  13  -1   17.83    2.52
  -5 -10   8   36.12    2.94
  -5  10   8   30.62    4.49
  -6  11   2    0.62    1.97
  -5 -12   6    1.26    4.10
  -7   7   2   -0.07    4.11
  -4   9  10    3.03    3.36
  -5  11  -4   40.02    3.46
   3 -16   2   56.39    4.49
  -6  11   1   15.97    2.40
   0  18   0   13.77    3.42
  -1 -12  -9    0.91    2.15
   0  -9  11  143.88    5.33
   5  -6   7    1.03    2.65
  -7   7   3   73.95    5.59
   4 -13  -7    4.28    2.19
  -4 -13   7    3.54    2.49
  -4 -13   7    0.67    3.89
   3 -12  -9  127.23    3.95
   3  12  -9   73.01    4.52
   4 -12  -8  151.12    4.46
  -4 -12   8  167.52    5.15
  -4   2  12   13.14    3.53
   3 -15   4    0.90    4.21
  -6  11   3   13.38    2.19
   6 -11  -3   21.66    2.00
  -6  -7   8   17.79    2.18
   4 -15   1   11.32    2.15
   3 -16  -4    5.65    2.27
   0  -6  12  191.45    5.86
   2 -17   2    0.69    2.61
  -7   7   1   21.65    4.73
  -5  12  -3    1.02    2.16
  -4   8  -8    8.69    2.62
  -1 -16   6   49.62    4.21
  -1 -16   6   48.95    5.26
  -1  16   6   45.33    3.03
   3 -15  -6   13.87    2.38
  -3 -15   6   11.04    3.88
  -4   5  -9   -0.31    2.12
  -5   3  11    7.42    2.74
  -1  -8 -11  115.54    4.57
  -4  10  -7    0.49    2.49
   6   0   6  216.31    5.14
  -5  10  -5   14.66    2.55
  -6   5   9  124.05    4.56
  -2 -14   8   36.15    3.70
  -3   6 -10   39.81    3.50
  -7  -5   6   18.69    1.85
   0 -16   6   13.95    4.09
   4   7 -11    4.67    2.55
  -2 -15   7  139.31    5.37
  -2 -15   7  120.86    6.34
  -1   7  12    8.15    3.44
  -1  -7  12    7.79    3.75
  -7   7   4   40.93    4.94
  -6  11   0    0.95    2.01
   2  11   9   71.22    3.60
  -2 -11  -9   73.65    3.72
  -4 -14   6   43.43    4.86
  -4  11   9    4.16    3.69
  -2  -6 -11    0.88    2.00
   3   9   9   67.80    4.00
  -2  -1  13   12.88    3.87
  -2  -9 -10   16.92    2.53
  -2   7  12   48.79    4.32
  -5   9   9   -0.70    3.42
   6 -11  -4    2.74    1.55
   1 -17   4    5.92    3.96
  -5 -13   5    1.68    4.22
   1 -18   1    3.04    2.76
  -2  -2  13    2.37    3.25
  -3   9  11    1.69    3.39
  -6  -9   7  157.85    3.90
  -6   9   7  116.27    5.82
  -6  10   6   25.22    4.40
   6 -10  -6   23.40    2.06
   3 -11 -10   38.71    2.77
   4 -15   2   99.63    4.06
   5 -14  -2    8.94    1.92
  -2 -16   6    3.92    4.31
  -2 -16   6    2.63    3.20
   5 -14  -1  115.51    3.85
  -5   9  -6    1.26    2.43
  -3   0 -11   42.50    3.17
  -4   6  -9   13.27    2.67
   3 -16   3    3.76    4.38
   2 -17   3  102.03    5.86
  -1 -15  -7   -0.04    2.17
  -2  -3  13  126.28    6.67
  -3  -1 -11   12.63    2.35
  -3   1 -11   11.85    2.68
  -1 -17   5    3.48    3.27
   3 -16  -5    4.65    2.26
  -7   8   3   21.52    4.77
   0 -17   5   31.03    4.06
   0 -17   5   36.86    4.42
  -6  -8   8    4.62    1.89
   1 -18   2  115.94    4.72
   0   1  13  256.68    6.28
  -1 -14  -8  137.54    4.99
  -3   2 -11   -0.26    2.21
   6 -11  -5  175.33    4.04
  -6   3  10    2.04    2.41
  -4  10  10    0.76    3.43
  -3  -1  13    2.69    2.84
   0 -10  11    4.07    2.78
  -5 -11   8    0.79    2.16
  -2  -7 -11   65.97    3.63
   0   2  13    0.91    2.93
  -7   8   4    3.02    4.28
  -1   4  13  127.97    5.14
  -7  -5   7    3.91    1.68
  -6  12   2   52.91    3.24
  -2  -4  13    1.94    3.30
  -3  -2  13   23.63    3.24
   2 -18  -1    0.73    2.37
  -6  12   1    5.27    2.20
   2 -18   0   14.62    2.88
   3 -17  -3   13.61    2.59
  -5  11  -5    0.82    2.15
  -3 -15   7    5.86    2.90
  -4 -13   8   31.85    3.35
  -5  10   9   12.64    3.87
  -4   7  -9   17.64    3.02
   1 -17   5    3.73    4.07
  -6  12   0   24.68    2.85
  -6  10   7    4.39    3.82
  -5  10  -6   14.87    3.17
   4 -16   1   19.16    2.72
   6 -11  -6    2.03    1.64
   0 -18   4   97.86    5.30
   3 -17  -4   24.42    2.94
  -2  -8 -11    3.53    2.36
   0   0   0    0.00    0.00

_computing_structure_solution     'SHELXT 2018/2 (Sheldrick, 2018)'
;

_shelx_hkl_checksum   64912

#==============================================================================
#     End of CIF
#==============================================================================
