# Supplementary material for: Solid State Structure and Hydrogen Bonding of Some Cyclic NH Carboximides
Source: MDPI journal article supplement (doi:10.3390/cryst13010150), 2023-01-15
Supplement: s1 [file s1 › 2.cif]

data_2
_audit_creation_date                               2020-08-25
_audit_creation_method                            'by CrystalStructure 4.3'

_publ_section_references
;
    ENTER OTHER REFERENCES

    Rigaku (2018). CrystalStructure. Version 4.3. 
    Rigaku Corporation, Tokyo, Japan.

    Sheldrick, G. M. (2014). Acta Cryst. (2014). A70, C1437.
    SHELXT Version 2018/2

    Sheldrick, G.M. (2008) SHELXL Version 2018/3, Acta Cryst. A64, 112-122.

    Rigaku Oxford Diffraction (2018), CrysAlisPro. version 1.171.40.14a.
    Rigaku Corporation, Tokyo, Japan

;


_chemical_formula_sum                             'C9 H9 N O2'
_chemical_formula_moiety                          'C9 H9 N O2'
_chemical_formula_weight                           163.18
_chemical_melting_point                            ?

#==============================================================================
# CRYSTAL DATA
_space_group_crystal_system                        monoclinic
_space_group_name_H-M_alt                         'P 1 21/c 1'
_space_group_name_Hall                            '-P 2ybc'
_space_group_IT_number                             14
loop_
_space_group_symop_id
_space_group_symop_operation_xyz
1   '+X,+Y,+Z'
2   '-X,1/2+Y,1/2-Z'
3   '-X,-Y,-Z'
4   '+X,-1/2-Y,-1/2+Z'
#------------------------------------------------------------------------------
_cell_length_a                                     11.1131(3)
_cell_length_b                                     6.07791(12)
_cell_length_c                                     12.2001(3)
_cell_angle_alpha                                  90.0000
_cell_angle_beta                                   110.690(3)
_cell_angle_gamma                                  90.0000
_cell_volume                                       770.90(4)
_cell_formula_units_Z                              4
_cell_measurement_reflns_used                      5708
_cell_measurement_theta_min                        4.25
_cell_measurement_theta_max                        67.84
_cell_measurement_temperature                      173
#------------------------------------------------------------------------------
_exptl_crystal_description                         prism
_exptl_crystal_colour                              colourless
_exptl_crystal_size_max                            0.120
_exptl_crystal_size_mid                            0.030
_exptl_crystal_size_min                            0.030
_exptl_crystal_density_diffrn                      1.406
_exptl_crystal_density_meas                        ?
_exptl_crystal_density_method                     'not measured'
_exptl_crystal_F_000                               344.00
_exptl_absorpt_coefficient_mu                      0.830
_exptl_absorpt_correction_type                     multi-scan
_exptl_absorpt_process_details
;
CrysAlisPro 1.171.40.14a (Rigaku Oxford Diffraction, 2018)
Empirical absorption correction using spherical harmonics,
 implemented in SCALE3 ABSPACK scaling algorithm.
;
_exptl_absorpt_correction_T_min                    0.829
_exptl_absorpt_correction_T_max                    0.975

#==============================================================================
# EXPERIMENTAL DATA

_diffrn_ambient_temperature                        173
_diffrn_radiation_type                            'Cu K\a'
_diffrn_radiation_wavelength                       1.54184
_diffrn_measurement_device_type                   'Rigaku XtaLAB P100'
_diffrn_measurement_method                         \w
_diffrn_detector_area_resol_mean                   5.811
_diffrn_reflns_number                              7229
_diffrn_reflns_av_unetI/netI                       0.0133
_diffrn_reflns_av_R_equivalents                    0.0216
_diffrn_reflns_theta_max                           68.319
_diffrn_reflns_theta_min                           4.253
_diffrn_reflns_theta_full                          67.684
_diffrn_measured_fraction_theta_max                0.991
_diffrn_measured_fraction_theta_full               0.996
_diffrn_reflns_Laue_measured_fraction_max          0.991
_diffrn_reflns_Laue_measured_fraction_full         0.996
_diffrn_reflns_point_group_measured_fraction_max   0.991
_diffrn_reflns_point_group_measured_fraction_full  0.996
_diffrn_reflns_limit_h_min                        -13
_diffrn_reflns_limit_h_max                         11
_diffrn_reflns_limit_k_min                        -6
_diffrn_reflns_limit_k_max                         7
_diffrn_reflns_limit_l_min                        -14
_diffrn_reflns_limit_l_max                         14
_diffrn_standards_number                           0
_diffrn_standards_interval_count                   .
_diffrn_standards_decay_%                          ?
_reflns_number_total                               1409
_reflns_number_gt                                  1385
_reflns_threshold_expression                       F^2^>2.0\s(F^2^)
_reflns_Friedel_coverage          0.000
_reflns_Friedel_fraction_max      .
_reflns_Friedel_fraction_full     .

#==============================================================================
# REFINEMENT DATA

_refine_special_details
;
    Refinement was performed using all reflections. The weighted 
    R-factor (wR) and goodness of fit (S) are based on F^2^.
    R-factor (gt) are based on F. The threshold expression of
    F^2^ > 2.0 sigma(F^2^) is used only for calculating R-factor (gt).
;
_refine_ls_structure_factor_coef                   Fsqd
_refine_ls_R_factor_all                            0.0783
_refine_ls_R_factor_gt                             0.0781
_refine_ls_wR_factor_ref                           0.1703
_refine_ls_wR_factor_gt                            0.1697
_refine_ls_number_restraints                       1
_refine_ls_hydrogen_treatment                      mixed
_refine_ls_number_reflns                           1409
_refine_ls_number_parameters                       114
_refine_ls_goodness_of_fit_ref                     1.068
_refine_ls_weighting_scheme                        calc
_refine_ls_weighting_details
           'w = 1/[\s^2^(Fo^2^)+(0.1329P)^2^+0.1579P] where P=(Fo^2^+2Fc^2^)/3'
_atom_sites_solution_hydrogens                     geom
_atom_sites_solution_primary                       direct
_atom_sites_solution_secondary                     difmap
_refine_ls_shift/su_max                            0.000
_refine_diff_density_max                           0.42
_refine_diff_density_min                          -0.68
_refine_ls_extinction_method                       SHELXL
_refine_ls_extinction_coef                         0.245(17)

loop_
_atom_type_symbol
_atom_type_description
_atom_type_scat_dispersion_real
_atom_type_scat_dispersion_imag
_atom_type_scat_source
  'C' 'C'  0.0181 0.0091 
;
International Tables for Crystallography
(Vol. C, Tables 4.2.6.8 and 6.1.1.4)
;
  'H' 'H'  0.0000 0.0000 
;
International Tables for Crystallography
(Vol. C, Table 6.1.1.4)
;
  'N' 'N'  0.0311 0.0180 
;
International Tables for Crystallography
(Vol. C, Tables 4.2.6.8 and 6.1.1.4)
;
  'O' 'O'  0.0492 0.0322 
;
International Tables for Crystallography
(Vol. C, Tables 4.2.6.8 and 6.1.1.4)
;

#==============================================================================
# ATOMIC COORDINATES AND THERMAL PARAMETERS

loop_
 _atom_site_label
 _atom_site_type_symbol
 _atom_site_fract_x
 _atom_site_fract_y
 _atom_site_fract_z
 _atom_site_U_iso_or_equiv
 _atom_site_adp_type
 _atom_site_occupancy
 _atom_site_site_symmetry_order  
 _atom_site_calc_flag
 _atom_site_refinement_flags_posn
 _atom_site_refinement_flags_adp
 _atom_site_refinement_flags_occupancy
 _atom_site_disorder_assembly
 _atom_site_disorder_group
O2 O 0.49618(9) 0.76865(18) 0.56992(10) 0.0353(4) Uani 1 1 d . . . . .
O9 O 0.85346(10) 0.33388(18) 0.67481(9) 0.0371(4) Uani 1 1 d . . . . .
N1 N 0.66063(11) 0.51807(19) 0.60734(10) 0.0282(4) Uani 1 1 d D . . . .
C2 C 0.60941(13) 0.7191(2) 0.61834(12) 0.0278(5) Uani 1 1 d . . . . .
C3 C 0.71495(13) 0.8610(2) 0.69840(12) 0.0290(5) Uani 1 1 d . . . . .
H3 H 0.727349 0.996187 0.656913 0.035 Uiso 1 1 calc R U . . .
C4 C 0.70183(14) 0.9210(3) 0.81882(13) 0.0356(5) Uani 1 1 d . . . . .
H4 H 0.646161 1.050349 0.818648 0.043 Uiso 1 1 calc R U . . .
C5 C 0.67083(16) 0.7085(3) 0.86842(14) 0.0402(5) Uani 1 1 d . . . . .
H5 H 0.590893 0.672220 0.875799 0.048 Uiso 1 1 calc R U . . .
C6 C 0.77521(16) 0.5819(3) 0.89979(13) 0.0399(5) Uani 1 1 d . . . . .
H6 H 0.783266 0.439611 0.933877 0.048 Uiso 1 1 calc R U . . .
C7 C 0.87908(14) 0.7058(3) 0.87127(13) 0.0342(5) Uani 1 1 d . . . . .
H7 H 0.969637 0.657682 0.914192 0.041 Uiso 1 1 calc R U . . .
C8 C 0.83575(13) 0.7143(2) 0.73433(12) 0.0288(5) Uani 1 1 d . . . . .
H8 H 0.904151 0.781705 0.709538 0.035 Uiso 1 1 calc R U . . .
C9 C 0.79057(13) 0.4988(2) 0.67187(12) 0.0279(5) Uani 1 1 d . . . . .
C10 C 0.84625(15) 0.9445(3) 0.89278(13) 0.0374(5) Uani 1 1 d . . . . .
H10A H 0.890394 1.054685 0.860548 0.045 Uiso 1 1 calc R U . . .
H10B H 0.862056 0.975655 0.976364 0.045 Uiso 1 1 calc R U . . .
H1 H 0.6128(17) 0.395(2) 0.5601(16) 0.048(5) Uiso 1 1 d D . . . .

loop_
 _atom_site_aniso_label
 _atom_site_aniso_U_11
 _atom_site_aniso_U_22
 _atom_site_aniso_U_33
 _atom_site_aniso_U_23
 _atom_site_aniso_U_13
 _atom_site_aniso_U_12
O2 0.0271(7) 0.0360(7) 0.0363(7) -0.0074(4) 0.0032(5) 0.0023(4)
O9 0.0304(7) 0.0363(7) 0.0431(7) -0.0007(4) 0.0112(5) 0.0051(4)
N1 0.0251(7) 0.0278(7) 0.0284(7) -0.0041(4) 0.0054(5) -0.0012(4)
C2 0.0272(8) 0.0288(8) 0.0258(7) -0.0016(5) 0.0073(6) -0.0008(5)
C3 0.0277(8) 0.0277(8) 0.0290(8) -0.0028(5) 0.0068(6) -0.0038(5)
C4 0.0331(9) 0.0381(9) 0.0343(9) -0.0120(6) 0.0103(6) -0.0033(6)
C5 0.0399(9) 0.0528(11) 0.0323(9) -0.0117(6) 0.0183(7) -0.0151(7)
C6 0.0487(10) 0.0436(10) 0.0273(8) -0.0005(6) 0.0132(6) -0.0110(7)
C7 0.0295(9) 0.0423(9) 0.0259(8) -0.0007(6) 0.0037(6) -0.0039(6)
C8 0.0247(8) 0.0341(9) 0.0267(8) -0.0003(5) 0.0080(6) -0.0044(5)
C9 0.0247(8) 0.0324(9) 0.0272(8) 0.0012(5) 0.0098(6) -0.0009(5)
C10 0.0351(9) 0.0431(10) 0.0304(8) -0.0086(6) 0.0070(6) -0.0098(6)

#==============================================================================
_computing_data_collection
                                   'CrysAlisPro 1.171.40.14a (Rigaku OD, 2018)'
_computing_cell_refinement
                                   'CrysAlisPro 1.171.40.14a (Rigaku OD, 2018)'
_computing_data_reduction
                                   'CrysAlisPro 1.171.40.14a (Rigaku OD, 2018)'
_computing_structure_solution
                                      'SHELXT Version 2018/2 (Sheldrick, 2014)'
_computing_structure_refinement
                                      'SHELXL Version 2018/3 (Sheldrick, 2008)'
_computing_publication_material
                                          'CrystalStructure 4.3 (Rigaku, 2018)'
_computing_molecular_graphics                     'CrystalStructure 4.3'

#==============================================================================
# MOLECULAR GEOMETRY

_geom_special_details
;
 All esds (except the esd in the dihedral angle between two l.s. planes)
 are estimated using the full covariance matrix.  The cell esds are taken
 into account individually in the estimation of esds in distances, angles
 and torsion angles; correlations between esds in cell parameters are only
 used when they are defined by crystal symmetry.  An approximate (isotropic)
 treatment of cell esds is used for estimating esds involving l.s. planes.
;

loop_
 _geom_bond_atom_site_label_1
 _geom_bond_atom_site_label_2
 _geom_bond_distance
 _geom_bond_site_symmetry_2
 _geom_bond_publ_flag
O2 C2 1.2238(17) . ?
O9 C9 1.2150(18) . ?
N1 C2 1.3744(18) . ?
N1 C9 1.3840(18) . ?
N1 H1 0.977(5) . ?
C2 C3 1.5045(18) . ?
C3 C8 1.5406(19) . ?
C3 C4 1.5697(19) . ?
C3 H3 1.0000 . ?
C4 C5 1.516(2) . ?
C4 C10 1.545(2) . ?
C4 H4 1.0000 . ?
C5 C6 1.331(3) . ?
C5 H5 0.9500 . ?
C6 C7 1.518(2) . ?
C6 H6 0.9500 . ?
C7 C10 1.541(2) . ?
C7 C8 1.5675(19) . ?
C7 H7 1.0000 . ?
C8 C9 1.5092(19) . ?
C8 H8 1.0000 . ?
C10 H10A 0.9900 . ?
C10 H10B 0.9900 . ?

loop_
 _geom_angle_atom_site_label_1
 _geom_angle_atom_site_label_2
 _geom_angle_atom_site_label_3
 _geom_angle
 _geom_angle_site_symmetry_1
 _geom_angle_site_symmetry_3
 _geom_angle_publ_flag
C2 N1 C9 113.87(12) . . ?
C2 N1 H1 125.4(12) . . ?
C9 N1 H1 120.7(12) . . ?
O2 C2 N1 124.22(13) . . ?
O2 C2 C3 127.24(13) . . ?
N1 C2 C3 108.55(11) . . ?
C2 C3 C8 104.72(11) . . ?
C2 C3 C4 115.59(12) . . ?
C8 C3 C4 103.17(11) . . ?
C2 C3 H3 111.0 . . ?
C8 C3 H3 111.0 . . ?
C4 C3 H3 111.0 . . ?
C5 C4 C10 100.45(13) . . ?
C5 C4 C3 106.55(12) . . ?
C10 C4 C3 98.47(11) . . ?
C5 C4 H4 116.3 . . ?
C10 C4 H4 116.3 . . ?
C3 C4 H4 116.3 . . ?
C6 C5 C4 108.03(13) . . ?
C6 C5 H5 126.0 . . ?
C4 C5 H5 126.0 . . ?
C5 C6 C7 107.66(14) . . ?
C5 C6 H6 126.2 . . ?
C7 C6 H6 126.2 . . ?
C6 C7 C10 100.55(13) . . ?
C6 C7 C8 106.76(11) . . ?
C10 C7 C8 98.53(12) . . ?
C6 C7 H7 116.2 . . ?
C10 C7 H7 116.2 . . ?
C8 C7 H7 116.2 . . ?
C9 C8 C3 104.93(11) . . ?
C9 C8 C7 115.58(12) . . ?
C3 C8 C7 103.36(11) . . ?
C9 C8 H8 110.8 . . ?
C3 C8 H8 110.8 . . ?
C7 C8 H8 110.8 . . ?
O9 C9 N1 124.08(13) . . ?
O9 C9 C8 128.00(13) . . ?
N1 C9 C8 107.92(11) . . ?
C7 C10 C4 94.19(11) . . ?
C7 C10 H10A 112.9 . . ?
C4 C10 H10A 112.9 . . ?
C7 C10 H10B 112.9 . . ?
C4 C10 H10B 112.9 . . ?
H10A C10 H10B 110.3 . . ?

loop_
 _geom_torsion_atom_site_label_1
 _geom_torsion_atom_site_label_2
 _geom_torsion_atom_site_label_3
 _geom_torsion_atom_site_label_4
 _geom_torsion
 _geom_torsion_site_symmetry_1
 _geom_torsion_site_symmetry_2
 _geom_torsion_site_symmetry_3
 _geom_torsion_site_symmetry_4
 _geom_torsion_publ_flag
C9 N1 C2 O2 -178.97(13) . . . . ?
C9 N1 C2 C3 0.90(16) . . . . ?
O2 C2 C3 C8 179.27(14) . . . . ?
N1 C2 C3 C8 -0.60(15) . . . . ?
O2 C2 C3 C4 66.5(2) . . . . ?
N1 C2 C3 C4 -113.38(14) . . . . ?
C2 C3 C4 C5 47.25(17) . . . . ?
C8 C3 C4 C5 -66.42(14) . . . . ?
C2 C3 C4 C10 150.87(12) . . . . ?
C8 C3 C4 C10 37.20(13) . . . . ?
C10 C4 C5 C6 -32.28(15) . . . . ?
C3 C4 C5 C6 69.90(15) . . . . ?
C4 C5 C6 C7 -0.35(16) . . . . ?
C5 C6 C7 C10 32.97(15) . . . . ?
C5 C6 C7 C8 -69.38(16) . . . . ?
C2 C3 C8 C9 0.14(14) . . . . ?
C4 C3 C8 C9 121.48(11) . . . . ?
C2 C3 C8 C7 -121.37(12) . . . . ?
C4 C3 C8 C7 -0.03(13) . . . . ?
C6 C7 C8 C9 -47.50(17) . . . . ?
C10 C7 C8 C9 -151.30(12) . . . . ?
C6 C7 C8 C3 66.53(14) . . . . ?
C10 C7 C8 C3 -37.27(12) . . . . ?
C2 N1 C9 O9 179.35(12) . . . . ?
C2 N1 C9 C8 -0.81(15) . . . . ?
C3 C8 C9 O9 -179.80(13) . . . . ?
C7 C8 C9 O9 -66.68(18) . . . . ?
C3 C8 C9 N1 0.36(14) . . . . ?
C7 C8 C9 N1 113.49(13) . . . . ?
C6 C7 C10 C4 -49.05(13) . . . . ?
C8 C7 C10 C4 59.89(12) . . . . ?
C5 C4 C10 C7 48.79(13) . . . . ?
C3 C4 C10 C7 -59.89(13) . . . . ?

loop_
_geom_hbond_atom_site_label_D
_geom_hbond_atom_site_label_H
_geom_hbond_atom_site_label_A
_geom_hbond_site_symmetry_D
_geom_hbond_site_symmetry_H
_geom_hbond_site_symmetry_A
_geom_hbond_distance_DA
_geom_hbond_distance_DH
_geom_hbond_distance_HA
_geom_hbond_angle_DHA
_geom_hbond_publ_flag
N1 H1 O2 . . 3_666 2.8438(15) 0.977(15) 1.902(15) 160.9(14) no

#==============================================================================
# Additional structures and associated data_? identifiers
# should be added at this point if there is more than one 
# structure analysis in the CIF.

_shelx_res_file
;
TITL DSAA15
    shelxl.res
    created by SHELXL-2018/3 at 18:45:32 on 25-Aug-2020
CELL  1.54184 11.11310 6.07791 12.20010 90.00000 110.69000 90.00000
ZERR  4 0.00030 0.00012 0.00030 0.00000 0.00300 0.00000
LATT 1
SYMM    -X, .50+Y, .50-Z
SFAC C H N O
UNIT 36 36 4 8
L.S. 20
FMAP 2
PLAN 5
WPDB -2
HTAB
BOND $H
CONF
LIST 4
TEMP -100.0
ACTA
SIZE 0.120 0.030 0.030
DFIX 0.9800 0.0050 N1 H1
WGHT    0.132900    0.157900
EXTI    0.245344
FVAR       6.77027
O2    4    0.496180    0.768654    0.569917    11.00000    0.02713    0.03596 =
         0.03632   -0.00742    0.00324    0.00227
O9    4    0.853455    0.333882    0.674806    11.00000    0.03039    0.03626 =
         0.04313   -0.00073    0.01120    0.00508
N1    3    0.660630    0.518067    0.607342    11.00000    0.02513    0.02778 =
         0.02844   -0.00405    0.00544   -0.00123
C2    1    0.609406    0.719100    0.618340    11.00000    0.02715    0.02877 =
         0.02581   -0.00156    0.00728   -0.00083
C3    1    0.714948    0.860959    0.698400    11.00000    0.02772    0.02774 =
         0.02899   -0.00282    0.00681   -0.00375
AFIX  13
H3    2    0.727349    0.996187    0.656913    11.00000   -1.20000
AFIX   0
C4    1    0.701830    0.920988    0.818820    11.00000    0.03308    0.03805 =
         0.03432   -0.01203    0.01031   -0.00331
AFIX  13
H4    2    0.646161    1.050349    0.818648    11.00000   -1.20000
AFIX   0
C5    1    0.670828    0.708541    0.868416    11.00000    0.03988    0.05277 =
         0.03231   -0.01168    0.01830   -0.01512
AFIX  43
H5    2    0.590893    0.672220    0.875799    11.00000   -1.20000
AFIX   0
C6    1    0.775210    0.581891    0.899786    11.00000    0.04873    0.04357 =
         0.02733   -0.00050    0.01321   -0.01098
AFIX  43
H6    2    0.783266    0.439611    0.933877    11.00000   -1.20000
AFIX   0
C7    1    0.879082    0.705774    0.871273    11.00000    0.02945    0.04232 =
         0.02588   -0.00075    0.00367   -0.00386
AFIX  13
H7    2    0.969637    0.657682    0.914192    11.00000   -1.20000
AFIX   0
C8    1    0.835745    0.714255    0.734334    11.00000    0.02473    0.03408 =
         0.02673   -0.00026    0.00800   -0.00436
AFIX  13
H8    2    0.904151    0.781705    0.709538    11.00000   -1.20000
AFIX   0
C9    1    0.790574    0.498776    0.671866    11.00000    0.02468    0.03243 =
         0.02719    0.00123    0.00982   -0.00087
C10   1    0.846246    0.944498    0.892775    11.00000    0.03505    0.04308 =
         0.03044   -0.00863    0.00703   -0.00983
AFIX  23
H10A  2    0.890394    1.054685    0.860548    11.00000   -1.20000
H10B  2    0.862056    0.975655    0.976364    11.00000   -1.20000
AFIX   0
H1    2    0.612823    0.395239    0.560098    11.00000    0.04775
HKLF 4


REM  DSAA15
REM wR2 = 0.1703, GooF = S = 1.068, Restrained GooF = 1.067 for all data
REM R1 = 0.0781 for 1385 Fo > 4sig(Fo) and 0.0783 for all 1409 data
REM 114 parameters refined using 1 restraints

END

WGHT      0.1006      0.1420

REM Instructions for potential hydrogen bonds
EQIV $1 x, y+1, z
HTAB C3 O9_$1
EQIV $2 -x+2, y+1/2, -z+3/2
HTAB C8 O9_$2
EQIV $3 -x+1, -y+1, -z+1
HTAB N1 O2_$3

REM Highest difference peak  0.418,  deepest hole -0.678,  1-sigma level  0.187
Q1    1   0.8647  0.2791  0.9911  11.00000  0.05    0.42
Q2    1   0.5257  1.1642  0.7611  11.00000  0.05    0.39
Q3    1   0.6355  0.7326  0.9868  11.00000  0.05    0.37
Q4    1   0.7213  0.6843  1.0120  11.00000  0.05    0.36
Q5    1   0.6621  0.2965  0.7203  11.00000  0.05    0.36
;

_shelx_res_checksum     911

_shelx_hkl_file
;
   0   0   1    3.34    0.87
   0   0   1    1.06    0.59
  -1   0   0 4469.38   11.26
  -1   0   0 4892.80   11.30
  -1   0   1    0.76    0.65
   1   0   1    0.31    1.86
  -1   0  -1   -0.01    1.19
   0  -1   0    1.75    0.77
  -1   0   213928.50   32.66
   0   0   216547.00   36.45
   0   0   215116.10   39.40
  -2   0   1    0.01    1.24
   0  -1   112106.60   29.28
   0   1   110679.20   29.97
  -1  -1   028066.50   54.63
  -1   1   024970.20   57.80
  -2   0   022943.40   47.14
  -2   0   021515.90   44.31
  -1   1   113003.00   29.15
  -1  -1   113379.90   32.50
  -2   0   226588.50   56.80
   1   1   115306.50   32.55
  -1  -1  -115313.10   37.22
   1   0   232872.00   69.21
   1   0   233493.50   72.99
  -1  -1   221818.80   49.56
   2   0   1   -0.01    2.42
  -2   0  -1   -0.01    1.32
   0  -1   223473.10   47.57
   0   1   223214.70   46.51
  -2   1   115282.70   38.12
  -2   1   112040.60   25.15
  -1   0   3    1.49    2.19
  -2  -1   010065.80   23.60
  -2   1   0 7451.85   26.29
   0   0   3   -0.08    2.24
   0   0   3   -0.40    1.56
  -2   0   3    0.02    1.71
  -2  -1   222280.20   49.15
  -2   1   216768.20   39.00
  -3   0   1   -1.99    1.58
  -3   0   2 1979.69   10.85
   1   1   223708.30   52.21
  -1  -1  -223571.00   56.25
  -3   0   042104.10   85.59
  -3   0   042103.60   86.20
   2  -1   1  499.02    6.59
   2   1   1  511.46    5.52
  -1  -1   330873.80   65.41
  -1   1   328987.60   69.15
   2   0   2 8379.05   26.76
  -2   0  -2 7488.92   27.32
   0   1   335387.00   79.27
   0  -1   337826.50   80.71
   1   0   3   17.98    2.00
   1   0   3   -1.52    2.38
  -2  -1   341088.30   82.58
  -2   1   336362.40   81.72
  -3   0   3    1.59    1.69
  -3   1   1  435.70    5.78
  -3  -1   1  420.97    6.13
  -3   1   2 7900.71   26.77
  -3  -1   2 8578.17   28.73
  -1   0   457615.00  121.70
   0  -2   019790.00   46.42
  -3   0  -1    1.32    1.37
   3   0   1    0.02    2.51
  -3   1   0    2.98    0.72
  -3   1   0    1.32    1.97
  -3  -1   0    2.18    1.81
   3  -1   0    1.14    0.60
  -2   0   456760.80  125.45
   0  -2   112426.20   33.28
   0  -2  -112578.50   35.31
   1  -2   0 8033.30   23.29
  -1  -2   0 7797.65   26.25
  -2  -1  -229212.90   68.99
   2  -1   228799.10   72.17
  -1  -2   113205.40   37.23
   1  -2  -112819.90   31.91
   0   0   449694.20  103.38
   0   0   446074.40  103.96
  -1  -1  -320580.30   54.80
   1   1   320587.70   52.45
   1  -1   320553.40   55.90
  -3   1   313787.00   28.97
  -3  -1   310355.20   37.50
  -4   0   217388.50   45.27
   1  -2   1 3833.22   12.55
  -1  -2  -1 3930.83   18.44
  -4   0   1    0.31    1.33
  -4   0   1    1.67    1.26
  -3   0   429796.90   69.65
  -1  -1   435202.20   79.08
  -1   1   434622.70   78.94
   3  -1   1 3019.58   10.69
   3  -1   1 2468.33   16.72
   3   1   1 2228.55   13.50
  -3  -1  -1 2784.41   16.11
   1  -2  -219389.00   47.99
  -1   2   219493.40   46.60
   0  -2   2 1627.72   10.06
   0  -2   2 1619.00    9.80
   0   2   2 1616.63   11.73
  -2  -1   432671.20   80.67
  -2   1   436076.60   76.34
  -2  -2   1  452.50    5.50
  -2   2   1  692.73    8.01
   2   0   3    0.56    2.61
   2   0   3    0.15    2.95
  -2  -2   043656.40   94.92
   2  -2   040653.10   94.68
  -4   0   3    0.94    1.84
  -4   0   041400.40   84.48
  -4   0   040831.90   89.24
   3   0   2  844.45    7.98
  -3   0  -2  826.59    8.39
   0  -1   425738.90   68.46
   0  -1   424761.90   62.02
  -2   2   2  202.89    5.37
  -2   2   2  217.40    2.76
   1   0   422727.20   62.19
   1   0   423096.80   58.74
  -4  -1   226881.20   60.27
  -4   1   228068.80   58.54
  -4   1   1 2370.80   16.26
  -4   1   1 1882.47    8.43
  -1  -2  -230763.30   72.84
   1  -2   230042.80   69.95
  -3  -1   459471.90  116.45
  -3   1   450482.20  114.97
  -2  -2  -120552.20   56.82
   2   2   121089.90   44.20
  -1  -2   315130.10   45.13
  -1   2   314381.30   50.17
   2   1   313185.30   42.52
   2   1   313187.30   41.65
  -2   0   5    1.04    1.97
  -1   0   5   -0.82    2.28
  -1   0   5    0.81    2.01
  -4   1   3 5051.19   19.06
  -4   1   3 4992.98   24.11
  -4   1   013187.80   31.77
  -4   1   013099.70   40.40
  -4  -1   013093.20   27.42
  -4   0   4 4108.14   18.47
   3   1   2 1203.06   11.36
   3  -1   2 1220.45    7.87
  -3  -1  -2 1166.90   11.29
   3  -1   2 1115.97   12.15
  -3  -1  -2 1137.05   11.08
   0   2   318264.50   49.51
   0  -2  -318336.00   52.33
  -2   2   3  261.02    5.65
  -2  -2   3  255.36    5.42
  -2   2   3  241.92    3.70
  -4   0  -1    1.26    1.69
   4   0   1    0.56    2.91
  -3  -2   1 1733.65   13.66
  -3   2   1 1775.06   13.47
  -3   2   1 1862.36   15.11
  -3   2   1 1882.75   13.24
   1   1   4  171.35    4.69
   1  -1   4  181.16    4.03
   1   1   4  148.93    4.52
   1  -1   4  155.14    4.94
  -3   0   5   16.14    2.33
  -3   0   5    7.03    1.22
  -3  -2   2    0.16    2.35
  -3  -2   2    2.69    2.39
  -3   2   2    3.26    2.45
  -3   2   034510.30   81.01
  -3  -2   034396.60   84.72
  -3   2   034400.20   82.38
   0   0   5   -0.47    2.60
   0   0   5   -1.05    2.29
   0   0   5    3.84    2.65
  -2   1   5  628.47    7.93
  -2   1   5  723.24    9.16
  -1  -1   514357.80   45.40
  -1   1   513973.20   44.41
   2  -2   234282.90   81.85
   2   2   234292.10   70.73
  -2   2  -227982.10   91.52
  -2  -2  -229969.40   77.34
  -2   2  -235006.40   78.37
  -2   2  -234490.90   81.04
  -2  -2  -234009.60   83.14
   2  -2   232864.90   65.58
  -5   0   2 5695.22   23.75
  -5   0   2 5815.03   25.79
  -4   1   4 6964.57   25.78
  -4  -1   4 6973.77   30.98
   1   2   318614.40   42.25
  -1   2  -318602.60   54.55
  -1  -2  -318619.50   54.88
   1   2   318673.10   52.74
   3   0   3    1.59    2.80
   3   0   3   11.26    2.26
  -4   1  -149845.80  106.41
  -4  -1  -147796.00  113.55
   4  -1   145430.30   99.55
  -4  -1  -146542.30  112.22
   4  -1   153619.00  121.59
  -4   1  -149105.70  106.53
   4   1   152340.40  111.31
  -3  -2   326931.40   75.36
  -3  -2   327044.30   75.04
   2   0   440393.70   95.75
   2   0   440664.30   94.14
  -5   0   1   -0.02    2.20
  -5   0   1    1.43    1.56
  -5   0   3    0.16    2.18
  -5   0   3    0.41    2.04
  -3  -1   512433.90   42.57
  -3  -1   511944.30   41.58
  -1  -2   410602.10   36.30
  -1   2   410668.90   36.82
   3   2   1   63.59    2.48
  -3  -2  -1   66.70    3.66
   3  -2   1   61.34    3.28
  -3  -2  -1   59.29    3.64
  -3   2  -1   50.53    2.96
  -3   2  -1   49.70    2.94
   0   1   5 2148.67   15.38
   0   1   5 2291.19   16.79
   0  -1   5 2318.33   15.59
   0  -1   5 2130.32   17.36
  -2  -2   437136.20   89.93
  -2  -2   436998.70   91.29
  -2   2   437176.00   82.79
   2   2  -437241.30   89.48
  -4   0   5    2.00    1.96
  -4   0   5   -0.86    2.16
  -4   0   5    1.65    2.37
  -4   0  -2 2214.97   15.36
   4   0   2 2080.25   14.13
  -5   1   2  232.78    5.58
  -5  -1   2  154.75    3.95
  -5  -1   2  170.37    4.16
  -5   1   2  115.77    1.97
  -5   1   2  250.45    5.22
  -5  -1   2  243.82    4.99
  -5   1   2  289.58    6.00
   1   0   5   -0.53    2.86
   1   0   5    0.94    2.47
   1   0   5    1.18    2.17
   0  -2   4 1619.06   13.88
   0   2   4 2055.67   14.58
   0   2   4 2148.85   17.57
   0   2   4 1749.99   14.26
   0  -2   4 1617.50   12.08
   0   2  -4 1836.42   14.70
  -5   0   029505.90   72.86
  -5   0   029317.50   65.53
  -3  -1  -3   25.29    2.99
   3   1   3   25.11    2.71
   3   1   3   27.66    2.77
   3   1   3   18.04    2.67
   3  -1   3   18.81    2.96
  -3  -1  -3   17.54    2.97
   2  -1   4   18.05    2.98
   2   1   4   38.46    3.23
   2  -1   4   24.98    2.03
   2   1   4   24.91    3.03
   2   1   4   41.48    3.30
  -5   0   4  922.79   10.00
  -5   0   4  928.03   10.62
  -5   1   1 4479.29   16.37
  -5   1   1 4504.13   23.34
  -5  -1   1 4463.50   23.49
  -5  -1   3 6076.41   28.82
  -5  -1   3 6072.54   25.79
  -5  -1   3 5927.10   28.42
  -5   1   3 5970.00   28.36
  -5   1   3 5882.20   21.94
  -5   1   3 6023.70   28.07
  -4  -2   248512.40  105.82
  -4   2   246609.70  108.45
  -4  -2   248741.00  105.80
  -4   2   246173.90  107.82
  -4   2   1  650.72    8.29
  -4   2   1  650.37    8.53
  -4   2   1  671.70    9.22
  -4   2   1  633.15    8.46
  -4  -2   1  647.00    9.11
  -2   0   694388.90  184.76
  -2   0   679779.30  182.98
  -3   2   4   16.51    2.82
  -3  -2   4   17.02    2.85
  -3   2   4   15.64    1.70
  -3   2   4   16.24    2.75
  -3  -2   4   17.87    2.94
   0   3   0    1.20    2.24
   0  -3   0    1.71    1.34
  -4   1   5 3382.60   18.67
  -4   1   5 3354.05   22.05
  -4  -1   5 3349.97   21.04
  -1   0   6 5981.25   28.73
  -1   0   6 6314.74   29.51
  -2  -2  -341834.60   98.90
   2  -2   341006.70   81.27
  -2   2  -341806.50   98.36
   2   2   342628.80   97.09
   2   2   341880.50   96.58
  -2  -2  -341450.70  100.54
   0   3  -130125.90   80.86
   0  -3   130238.50   70.46
  -3   0   615475.20   50.82
  -3   0   615349.30   50.31
  -1   3   0 2898.93   19.85
  -1  -3   0 3184.94   18.83
  -1  -3   0 2932.84   17.60
   1   3   0 3143.15   18.22
   1   3   0 2983.28   19.23
   1  -3   0 2648.66    8.27
  -1   3   0 2927.84   18.82
   1  -3   0 2721.16   12.10
   4   1   233252.50   86.05
  -4  -1  -232872.90   84.97
   4  -1   231876.70   75.54
   4  -1   231505.00   89.50
  -4  -1  -234500.50   85.30
  -4  -2   3  102.58    4.46
  -4   2   3  100.70    1.92
  -4   2   3   99.70    4.23
  -1   3   1  246.82    3.78
  -1  -3   1  236.66    4.69
   1  -3  -1  282.13    4.34
  -1   3   1  250.61    5.91
   1   3  -1  245.06    5.76
   1   3  -1  217.75    4.73
  -1   3   1  197.44    5.20
  -4   2   0 5204.25   25.48
  -4  -2   0 5969.83   30.30
   4  -2   0 6093.26   33.13
  -4  -2   0 5599.28   29.16
  -4   2   0 5133.82   23.47
  -4   2   0 5086.81   25.20
  -3   2  -2 2156.22   15.86
   3  -2   2 2127.86   18.25
   1  -1   5  257.60    5.45
   1  -1   5  218.80    6.38
   1   1   5  240.50    5.92
   1   1   5  206.58    5.64
   1  -1   5  266.18    5.79
   1   1   5  236.30    5.79
   5  -1   0 3695.00   27.62
  -5   1   0 3864.79   15.36
  -5  -1   0 3357.64   21.09
  -5   1   0 3383.39   20.57
   5   1   0 2996.10   21.10
  -5   1   0 3198.32   18.03
   5  -1   0 3533.01   13.74
  -5   1   0 3518.61   20.51
  -5  -1   0 3571.00   22.15
  -5  -1   4 6154.66   30.53
  -5   1   4 6832.24   26.53
  -5   1   4 6192.27   30.76
  -5  -1   4 6727.29   32.22
  -5  -1   4 6490.74   27.09
   1   2   4 2528.00   11.81
  -1  -2  -4 2632.40   19.75
   1  -2   4 2583.70   15.52
   1   2   4 2508.79   18.42
  -1  -2  -4 2511.72   19.79
   1   2   4 2604.26   18.92
  -1   2  -4 2587.26   19.11
  -1   3  -1 9508.75   39.70
  -1   3  -1 8910.81   32.61
   1  -3   1 9253.44   25.88
  -1  -3  -1 9212.94   35.86
  -1   3  -1 9078.83   36.72
   1  -3   1 9785.21   27.65
  -1  -3  -1 9383.07   36.88
   5   0   1    3.87    3.04
  -5   0  -1    6.13    1.86
   2   1  -645136.00  101.49
  -2   1   645017.90  105.63
  -1  -3   2 8583.38   32.15
   1   3  -2 9142.58   32.81
  -1   3   2 9720.90   30.87
  -1  -3   2 8642.89   32.63
   1  -3  -2 9375.21   31.75
   1   3  -2 9087.07   38.62
   0   3  -223881.40   70.58
   0   3  -224232.40   64.60
   0   3   223938.60   61.50
   0  -3  -223700.90   63.45
   0  -3  -223381.30   62.94
   0   3   223566.20   61.63
  -5   0   5    3.37    2.10
  -5   0   5   -0.22    2.25
  -5   0   5    0.03    1.83
   0   0   6 1188.63   14.39
   0   0   6 1100.70   11.60
   2   3  -111455.40   41.57
  -2   3   111372.20   40.51
  -2   3   111396.50   43.08
   2  -3  -111300.20   32.93
  -1   1   6 4298.55   25.16
  -1   1   6 4377.47   26.16
   3   0   4  294.18    6.17
   3   0   4  350.41    6.98
  -2   2   5 7266.81   32.53
  -2  -2   5 7284.30   32.81
  -2   2   5 7517.67   31.50
  -2  -2   5 7796.84   34.80
   2   2  -5 7018.93   32.03
  -2   2   5 7967.20   32.72
  -3  -1   617710.00   58.02
  -3  -1   616854.50   56.85
  -1   2   5 1371.49   12.15
  -1   2   5 1239.53   11.83
  -1  -2   5 1132.65   11.06
  -1   2   5 1346.01   12.71
   1   2  -5 1029.03   12.25
  -1  -2   5 1253.85   11.99
  -2  -3   0  104.49    4.45
  -2   3   0  103.27    3.84
  -2  -3   0   94.54    4.01
  -2   3   0   94.65    4.22
   2  -3   0  106.77    3.15
  -4   0   6  131.43    4.67
  -4   0   6  175.40    5.59
  -4   2   423875.30   71.13
  -4   2   422404.90   70.81
  -4  -2   423021.00   70.64
  -4  -2   422645.10   71.42
  -4   2   424357.80   56.36
   2  -3  -2 3086.43   17.00
  -2   3   2 4741.01   24.55
   2   3  -2 4145.02   23.84
  -2   3   2 4561.92   25.52
  -2  -3   2 3320.14   18.65
  -2  -3   2 4241.96   22.85
  -2   3   2 4587.87   14.69
  -4   2  -1  967.28   11.27
  -4   2  -1  947.17   11.10
  -4   2  -1  951.64   10.53
  -4   2  -1  935.66    9.80
   4   2   1  962.04    9.80
  -4  -2  -1  961.40   12.49
  -4  -2  -1  937.20   12.46
   2   0   5    1.84    2.03
   2   0   5    1.14    2.44
   4   0   3    1.55    2.08
   4   0   3    1.62    2.09
   4   0   3   -1.01    2.84
  -6   0   221674.40   57.23
  -6   0   221576.40   64.09
   3   2  -510092.30   39.15
  -3  -2   511584.20   45.76
  -3  -2   510718.40   42.70
  -3   2   510833.50   36.70
  -3   2   511322.20   37.99
  -3   2   510765.60   42.94
  -6   0   3    1.00    2.09
  -6   0   3    1.36    1.95
  -1  -3  -2 2688.72   19.73
   1  -3   2 2402.68   14.94
  -1   3  -2 2739.98   18.79
   1   3   2 2824.14   18.80
  -1  -3  -2 2622.12   18.45
   1  -3   2 2521.58   11.62
  -1   3  -2 2843.94   21.49
   5  -1   1 3673.69   26.92
  -5  -1  -1 4022.95   24.61
  -5  -1  -1 3960.88   24.91
  -5   1  -1 4008.55   23.36
   5   1   1 3718.71   24.71
  -5   1  -1 4064.22   20.88
   0  -2   5  272.33    5.92
   0  -2   5  255.84    6.97
   0   2   5  256.70    6.10
   0   2   5  259.93    6.16
   0  -2   5  260.60    5.74
   0   2   5  275.94    5.04
   0   2  -5  258.11    6.80
  -2  -3  -131734.90   85.60
  -2   3  -132085.30   79.69
  -2  -3  -131789.20   85.44
  -2   3  -132659.60   85.63
  -2   3  -132320.10   84.03
  -5  -1   5  694.45    8.61
  -5  -1   5  700.28   10.93
  -5  -1   5  625.91   10.03
  -5   1   5  655.08   10.28
  -5   1   5  625.13    7.86
   0   1   633027.60   88.00
   0  -1   633192.50   87.30
  -1   3   3 3035.98   17.33
  -1  -3   3 2830.39   18.75
  -1  -3   3 2905.39   18.45
  -1   3   3 2963.82   19.47
   1   3  -3 2830.38   21.64
  -3  -1  -4 2723.99   21.11
   3  -1   4 3135.50   19.13
   3  -1   4 2998.58   18.17
   3   1   4 2798.35   20.21
   3   1   4 2300.27   18.53
  -3  -1  -4 2684.21   21.51
   3  -1   4 2304.71   20.11
   3   1   4 2775.16   20.37
  -6   0   1   -0.82    1.89
  -6   0   1    1.06    2.39
  -6   0   1    0.42    1.99
  -6   0   1    1.72    1.78
  -6   0   1    1.11    1.44
  -4  -1   630407.80   76.35
  -4   1   630797.90   71.22
  -5  -2   2 5478.71   29.94
  -5   2   2 5552.62   27.29
  -5   2   2 5715.03   30.00
  -5   2   2 5424.34   27.85
  -5   2   2 5708.03   28.66
   0   3   3 7319.50   31.70
   0  -3  -3 7415.52   33.63
   0  -3  -3 7246.85   32.07
   0   3  -3 7292.20   36.77
   0   3   3 7174.97   31.20
  -6   0   4 8852.48   36.52
  -6   0   4 8793.99   35.99
  -2  -3   312304.60   45.15
   2   3  -312149.70   46.36
  -3  -2  -3 9834.54   42.71
  -3  -2  -3 9823.55   43.15
   3   2   3 9913.31   41.44
   3  -2   3 9873.98   27.22
   2  -1   5 5268.84   31.62
   2   1   5 5145.38   28.93
   2  -1   5 5970.54   27.07
   2  -1   5 5864.13   27.13
   2   1   5 5664.31   29.86
   2   1   5 6039.53   31.58
  -4  -1  -328748.20   82.18
   4  -1   329545.80   69.29
  -4  -1  -328236.00   83.25
   4  -1   328191.00   89.70
   4   1   329575.80   80.30
   4   1   328908.60   79.74
   4   1   329954.80   86.47
  -2   2  -4 7396.68   34.92
  -2  -2  -4 6773.43   34.29
  -2  -2  -4 6910.04   34.97
   2   2   4 6853.77   32.80
   2  -2   4 6439.65   33.78
   2  -2   4 7005.10   26.15
   2   2   4 7001.92   33.46
   2   2   4 7424.26   30.96
  -3  -3   130597.80   82.99
  -3   3   130623.70   75.36
  -3   3   130857.60   82.63
   5   2  -1 9431.79   38.59
  -5  -2   1 8701.51   38.89
  -5  -2   1 8738.71   39.15
  -5   2   1 9172.37   37.10
  -5   2   1 8986.64   36.88
  -5   2   1 9295.82   39.30
  -5   2   1 9109.28   37.04
  -5   2   3 5585.28   29.14
  -5   2   3 5975.46   29.24
  -5  -2   3 5415.09   30.86
  -5  -2   3 5763.10   31.28
  -6   1   2    5.25    2.95
  -6  -1   2    6.74    1.45
  -6   1   2    1.30    2.57
  -6   1   2    2.11    1.65
  -6   1   2    1.81    2.01
   1   0   642978.90  116.17
   1   0   644384.90  118.88
   5   0   2 3401.03   19.91
  -5   0  -2 3319.98   20.44
   5   0   2 3046.45   18.67
   5   0   2 2892.96   23.71
  -5   0  -2 3082.82   20.31
  -3   3   228290.30   80.58
  -3   3   227918.00   80.99
  -3   3   228566.80   73.40
  -3   3   228265.80   75.04
  -3  -3   228013.00   79.11
  -6   1   324391.00   71.68
  -6  -1   324339.60   71.17
  -3  -3   028019.10   80.02
  -3   3   028098.90   68.52
  -3   3   027949.50   76.83
  -5   0   6  346.37    7.04
  -5   0   6  337.33    6.59
  -4  -2   5    5.19    3.01
  -4   2   5    1.10    0.80
  -4   2   5    4.56    3.02
   4   2  -5    4.97    1.81
  -4  -2   5    4.41    2.94
  -4   2   5   -0.88    2.09
  -2   0   7   44.47    4.24
  -2   0   7   45.46    5.13
  -6   1   1  804.88   10.17
  -6   1   1  772.11   10.61
  -6  -1   1  779.76   10.93
  -6  -1   1  744.86   10.95
  -6   1   1  742.64    6.61
  -6   1   1  761.66   10.11
  -6   0   073694.30  161.82
  -6   0   072823.70  163.73
  -3   0   7  359.93    7.52
  -3   0   7  157.73    5.37
  -4   2  -2  517.50    8.33
   4  -2   2  503.32    9.90
  -4   2  -2  542.10    8.94
  -4  -2  -2  521.29    9.55
   4   2   2  509.38    7.31
  -4  -2  -2  539.49    9.60
  -2   3  -211844.50   47.79
  -2  -3  -211244.20   44.55
   2  -3   212308.20   43.57
  -2   3  -211430.50   41.56
  -2   3  -212347.10   46.10
  -2  -3  -210994.50   44.65
   1  -2   5 9877.19   36.77
   1  -2   510301.70   37.22
   1   2   510067.60   28.52
   1   2   510430.40   43.83
  -1   2  -5 9488.16   42.31
   1  -2   5 9598.90   44.80
   1   2   510253.70   43.18
   5   2   011733.60   41.88
  -5  -2   011269.50   46.81
  -5  -2   012083.00   49.37
  -5   2   011932.20   40.49
  -5   2   011988.90   43.82
   5  -2   011819.90   51.95
  -5   2   011496.40   42.65
   1  -3   3  191.05    3.73
   1   3   3  169.68    5.03
   1  -3   3  199.48    5.09
  -1   3  -3  165.24    4.47
  -1  -3  -3  177.12    5.47
  -1   3  -3  170.89    5.87
   1   3   3  172.13    5.24
  -1  -3  -3  189.85    5.78
  -6  -1   411387.80   46.49
  -6   1   411857.90   46.48
  -6  -1   411726.20   47.63
  -6  -1   412275.80   43.25
  -6   1   411845.70   38.84
  -6   1   412073.90   45.77
  -3   3   3 8904.26   37.44
   3   3  -3 8814.60   36.46
  -3  -3   3 8896.17   39.26
  -5  -2   4  384.09    8.53
  -5  -2   4  367.24    8.38
  -5   2   4  390.86    4.60
  -5   2   4  391.36    8.43
  -1   0   7    2.53    2.69
  -1   0   7    3.38    2.97
  -6   0   5    8.84    2.37
  -6   0   5   11.36    2.43
   1   1   611842.90   48.62
   1   1   611875.20   46.52
   1   1   611782.00   47.07
  -5  -1  -2 1752.58   16.78
  -5   1  -2 1596.74   14.34
   5  -1   2 1775.85   19.17
  -5  -1  -2 2011.54   17.87
   5   1   2 1814.33   17.58
   5   1   2 1950.06   17.34
  -2  -2   6 2143.95   17.77
  -2   2   6 2104.11   17.13
  -2   2   6 2123.78   16.88
  -1   3   4  980.81   10.76
  -1   3   4 1021.37   11.05
  -1   3   4 1112.63   12.71
  -1  -3   4 1075.34   12.26
   1   3  -4  969.09   13.67
  -1  -3   4 1048.11   12.08
  -3   3  -1 9788.59   41.82
  -3  -3  -1 9857.25   42.71
  -3   3  -1 9931.77   39.26
  -3  -3  -1 9792.86   42.51
  -2  -3   425544.20   74.54
  -2   3   428336.40   68.88
  -2   3   429114.70   70.70
  -2   3   431799.30   86.06
  -2  -3   428456.60   80.46
   2   3  -429056.80   84.78
  -5   1   6 1416.40   13.36
  -5  -1   6 1530.62   12.95
  -5   1   6 1444.90   15.87
  -5  -1   6 1571.02   17.47
  -5   1   6 1385.50   13.13
  -5  -1   6 1467.89   15.71
   2   1  -744971.70  107.13
  -2   1   745814.70  111.73
  -2  -1   746105.70  113.75
  -2   1   745297.10  112.65
  -4   0   7    0.68    2.66
  -4   0   7    0.49    2.25
  -4   0   7   -1.53    2.81
   1   2  -6 1310.27   14.26
  -1  -2   6 1475.50   14.69
  -1   2   6 1547.22   15.38
  -1  -2   6 1467.02   14.87
  -1   2   6 1448.76   13.46
  -1   2   6 1309.40   13.77
   6   1   0  207.15    6.70
   6  -1   0  202.89    3.65
  -6   1   0  193.36    3.76
  -6  -1   0  265.32    4.93
   6  -1   0  224.69    8.39
  -6   1   0  247.42    6.17
  -6  -1   0  224.21    6.47
  -6   1   0  218.53    5.90
  -3   2   610661.40   39.90
  -3  -2   611489.30   47.57
   3   2  -611081.40   41.78
  -3  -2   611074.60   45.51
  -3   2   610605.30   39.80
  -3   2   610562.50   44.03
   3   1  -7 6439.48   29.53
  -3  -1   7 6409.08   35.39
   3   0   5    1.85    2.89
   3   0   5    0.54    1.98
   3   0   5    0.53    2.69
   4   0   466568.10  153.14
   4   0   468849.70  156.47
   0  -3   4 8936.84   34.78
   0  -3   4 9093.79   35.14
   0   3   4 8713.13   37.37
   0   3  -4 8714.18   33.26
   0   3  -4 8608.61   41.69
  -1  -1   7 8336.53   40.86
   1   1  -7 7532.51   36.00
  -1   1   7 7558.85   37.13
  -1  -1   7 8064.19   39.14
  -6   1   5  459.19    7.45
  -6   1   5  447.68    7.23
  -6  -1   5  451.76    7.74
  -6  -1   5  461.62    9.63
  -4   3   224067.70   68.57
  -4   3   223321.10   72.58
  -4   3   224102.70   65.42
  -4  -3   223541.70   72.67
  -4  -3   224106.30   73.80
  -4  -3   1 3582.25   26.11
  -4  -3   1 3476.77   25.68
  -4   3   1 3468.83   21.55
  -4   3   1 3380.38   23.83
  -4   3   1 3328.41   20.71
   4  -3  -1 3256.77   22.34
  -4   3   1 3415.54   22.96
   0   0   7    0.10    2.53
   0   0   7    1.25    2.82
   6   0   1   -0.32    2.59
   6   0   1    1.52    2.06
  -6   0  -1    0.51    2.03
   6   0   1    2.67    1.79
  -6   0  -1    2.98    1.97
  -6   0  -1    2.26    2.06
   5  -2   115096.40   61.01
   5   2   115106.00   52.01
  -5   2  -115146.60   51.21
  -5   2  -115181.50   51.63
  -3  -3   435548.00   97.33
  -3   3   435354.40   98.77
  -3  -3   435413.90   96.39
  -3   3   435405.60   76.61
  -5   2   5 7444.71   37.93
  -5   2   5 7445.93   27.33
  -4  -1   747298.90  105.41
  -4   1   747385.10  115.42
  -4   1   747137.10  115.12
   0   2   6 4305.39   27.47
   0  -2   6 4664.95   27.15
   0   2  -6 4097.03   27.92
   0  -2   6 4568.36   26.45
   0   2   6 4081.47   25.76
   0   2   6 5015.28   24.69
   2   0   6 8637.34   39.33
   2   0   6 8388.48   37.79
  -2   3  -3 5931.24   29.47
   2   3   3 5755.19   31.34
   2   3   3 5912.56   31.57
   2  -3   3 5740.42   30.06
  -2  -3  -3 5887.14   32.41
  -2  -3  -3 5862.68   33.46
   3  -2   4 7575.86   26.55
  -3   2  -4 7686.28   37.79
   3  -2   4 7940.71   41.92
   3   2   4 7539.35   37.33
   3   2   4 7904.74   35.37
  -3  -2  -4 7582.27   39.09
  -4  -3   3 3436.02   24.87
  -4   3   3 3387.97   24.80
   5   0   3    3.27    2.28
   5   0   3    0.65    3.06
   5   0   3    2.61    2.20
  -4   2   671049.70  158.53
   4   2  -671139.40  136.96
  -4  -2   671453.20  154.30
   3  -1   511239.50   41.95
   3  -1   512907.30   46.94
   3   1   511096.80   48.16
   3   1   511713.30   48.92
   3   1   5 9673.36   45.94
  -4   3   0 1624.75   15.80
  -4   3   0 1525.54   13.14
   4  -3   0 1434.11   15.00
  -4   3   0 1492.60   15.81
  -4  -3   0 1574.61   17.30
  -4   3   0 1638.94   15.97
   4   1   4 3866.68   26.31
   4  -1   4 4045.14   22.57
   4   1   4 3590.42   26.82
  -4  -1  -4 3726.37   27.51
  -4  -1  -4 3576.66   27.10
   4   1   4 3886.39   26.11
  -3  -3  -2 4865.85   30.29
   3  -3   2 4966.49   28.12
  -3  -3  -2 5033.13   30.28
  -3   3  -2 5388.77   28.56
  -3   3  -2 5371.45   31.11
  -6   0   6 2496.16   20.66
  -6   0   6 2533.41   20.55
   2  -2   5 1405.64   16.96
   2   2   5 1529.82   16.67
   2  -2   5 1420.54   12.46
  -2   2  -5 1471.49   16.42
   2  -2   5 1500.90   12.66
  -4   2  -3 1030.74   13.18
  -4   2  -3  986.95   12.17
  -4  -2  -3 1020.97   13.98
   4  -2   3 1049.51   15.65
   4   2   3 1014.03   13.29
  -7   0   3    0.78    1.53
  -7   0   3    2.08    1.12
  -7   0   3   -0.27    2.80
  -7   0   3    2.53    2.09
  -5   0   7  290.00    6.68
  -5   0   7  192.93    5.94
   1  -3   411223.90   44.26
  -1   3  -410679.10   40.91
  -1  -3  -410652.90   48.07
  -1   3  -410809.10   47.94
   1   3   411037.00   46.21
  -1  -3  -410865.10   47.83
   1  -3   411255.50   37.22
   1   3   410689.50   45.20
  -6  -2   2  593.88   10.67
  -6   2   2  617.72   10.26
  -6   2   2  615.27   10.24
  -6   2   2  597.71   10.02
  -7   0   225166.70   73.11
  -7   0   224901.40   72.70
   0  -1   7 2312.48   20.15
   0   1   7 2003.36   19.71
  -6  -2   317632.60   63.61
  -6   2   317522.90   57.55
  -6  -1  -152482.60  129.42
  -6   1  -153183.50  117.62
   6  -1   152976.10  107.99
  -6  -1  -152050.50  129.94
  -6   1  -153181.70  126.71
  -6  -1  -152399.10  115.33
  -7   0   4 5566.60   29.70
  -7   0   4 5371.65   29.56
   2   1   6 6689.91   36.95
   2   1   6 6650.47   36.90
  -2   3   5 1277.08   12.78
  -2  -3   5 1293.62   14.70
   2   3  -5 1145.66   14.02
  -2   3   5 1239.04   14.41
  -2   3   5 1372.34   13.41
  -2  -3   5 1395.20   15.46
  -6   2   1  597.69    7.49
  -6   2   1  569.93    9.65
  -6   2   1  579.09    9.20
  -6   2   1  567.49    9.63
  -6   2   1  553.20    9.72
  -6  -2   1  602.42   11.20
   1   3  -5 4426.90   21.01
  -1   3   5 4407.98   25.59
  -1  -3   5 4382.13   26.01
  -1  -3   5 4433.13   26.72
   5   1   3   21.43    3.27
  -5  -1  -3   19.86    3.17
   5  -1   3   13.73    1.65
   5  -1   3   24.47    2.24
   5   1   3   19.27    3.35
   4   3  -4   16.48    2.52
  -4  -3   4   24.47    3.89
  -4   3   4   18.07    3.38
  -7   0   1    4.59    2.25
  -7   0   1   -0.10    1.90
  -7   0   1    7.50    1.38
  -7   0   1   12.62    2.27
  -6   2   4 1021.82   13.77
  -6   2   4  974.39   11.88
  -6   1   6 3969.28   27.90
  -6  -1   6 3933.54   28.60
  -6   1   6 3991.54   23.63
  -4   3  -1 7798.94   31.45
  -4   3  -1 7726.63   37.17
  -4   3  -1 7803.86   38.71
  -7   1   3  457.15    9.35
  -7   1   3  484.31    6.99
  -7  -1   3  498.88    9.38
  -7   1   3  511.13    6.85
  -7  -1   3  453.74    9.04
  -5   1   7 1049.89   12.91
  -5  -1   7 1065.26   11.29
  -5   1   7 1081.04   14.75
  -5   1   7 1067.38   13.13
  -5  -1   7 1033.39   14.02
   1   0   7    2.99    2.76
  -7   1   228045.50   79.69
  -7  -1   228021.10   84.70
   3   3  -5  898.04   12.37
  -3   3   5  924.20   13.81
  -3  -3   5  918.03   13.18
  -1   2  -620718.80   71.07
   1  -2   620549.70   62.96
  -5   2  -2  683.69   10.94
  -5   2  -2  707.12   10.06
   5   2   2  588.37    9.19
  -5  -2  -2  599.85   10.89
  -3   0   816948.80   61.27
  -3   0   817093.90   62.51
  -2   0   826072.10   83.56
   0  -4   025232.50   65.46
   0   4   025345.30   75.24
  -6   0  -2 7426.41   35.49
   6   0   2 7848.70   34.10
  -6   0  -2 7847.61   35.21
   6   0   2 7520.57   33.33
   0   3  -5 8636.65   34.96
   0  -3   5 8667.73   36.80
   0   3   5 8509.45   38.66
   0  -3   5 8310.72   35.51
   0   3   5 8421.55   32.53
  -7   1   4 1891.15   13.99
  -7  -1   4 1275.59   13.21
  -7   1   4 1650.07   12.86
  -7   1   4 1255.68    9.99
  -7  -1   4 1673.70   15.71
  -7   1   4 1771.53   18.27
  -7   0   5   -0.46    2.36
  -7   0   5    1.51    2.10
  -5   2   611427.50   51.47
  -5   2   610676.70   38.59
  -5   2   610656.00   39.09
  -5  -2   611502.80   51.19
   2   2  -7 3587.22   25.09
  -2   2   7 3606.04   24.00
  -2   2   7 3647.94   25.22
   0   4   1 2043.62   14.80
   0  -4  -1 2180.32   15.95
   0   4   1 2336.38   16.63
   0   4   1 2043.08   14.81
   0  -4   1 2346.99   16.16
   0   4   1 2105.89   18.57
   0   4  -1 2166.13   18.27
   0  -4  -1 2075.28   15.95
   0   4  -1 2315.37   20.69
  -6   2   0 3553.69   20.75
  -6   2   0 3512.38   23.88
  -1  -4   0 9374.48   39.65
  -1   4   0 8556.63   40.62
  -1  -4   0 9087.64   40.10
  -1   4   0 8799.37   42.72
   1   4   0 8602.39   37.61
   3   2  -7 2567.68   20.04
  -3   2   7 2555.35   19.83
  -3   2   7 2534.85   19.77
  -1   4   1 6458.43   27.85
  -1  -4   1 6441.65   30.64
   1   4  -1 6458.67   30.94
  -1   4   1 6536.61   34.74
  -5   3   2 7650.36   39.08
  -5   3   2 7733.87   31.63
  -7   1   1  159.65    5.33
  -7  -1   1  172.98    6.03
  -7   1   1  155.84    4.74
  -7   1   1  154.02    5.90
  -4   0   8 6978.55   37.93
  -4   0   8 6621.05   34.90
  -3  -3  -3 9160.42   44.59
   3   3   3 9164.09   43.01
   2  -3   4  294.90    7.52
   2   3   4  274.18    7.42
  -2  -3  -4  292.10    8.02
  -2   3  -4  266.78    6.71
  -1  -2   7    3.30    2.76
  -1   2   7    1.75    3.04
  -1   2   7    2.76    1.88
  -5  -3   138029.60  108.54
   5  -3  -136625.60  106.01
  -5   3   137483.70   97.44
  -5   3   137184.00  102.19
  -5   3   137344.70   94.70
  -5   3   136954.40  102.34
  -1   0   8 1459.67   17.27
  -7   0   0 1201.41   12.80
  -7   0   0 1167.06   12.77
   1  -1   7 5644.10   33.47
   1   1   7 4896.26   31.34
  -6   2   5 8765.86   40.02
  -6  -2   5 9077.17   45.98
  -5  -3   3 5763.12   34.84
  -5   3   3 5811.78   32.01
  -5   3   3 5760.49   33.26
   1   4   1 6478.00   31.79
  -1  -4  -1 6414.19   33.35
  -1   4  -1 6604.44   35.51
   1   4   1 6227.13   33.10
  -1  -4  -1 6115.51   31.32
  -1   4  -1 6023.55   35.36
  -3   1   824347.60   79.46
  -3  -1   824419.00   82.36
   3   1  -824551.80   72.27
   4   0   5    1.04    2.55
  -6   0   7    0.54    2.55
  -6   0   7    0.26    2.49
  -2   1   8 3868.95   27.25
  -2  -1   8 3880.91   27.16
  -1  -4   214745.80   51.96
  -1  -4   215128.70   51.92
   1   4  -215160.20   52.48
   1   4  -214772.20   58.60
  -1   4   214888.20   58.87
   6   1   2 4287.14   27.49
  -6  -1  -2 4248.72   28.41
  -6   1  -2 4268.64   28.01
   0   4  -2 2406.11   19.59
   0  -4  -2 2377.02   17.98
   0   4   2 2361.07   17.20
   0   4   2 2347.18   20.75
  -7  -1   5  922.18   13.28
  -7   1   5  893.36   10.50
  -7   1   5  909.70    9.91
  -7   1   5  889.80   13.28
  -7  -1   5  962.15   12.39
  -7   1   5  992.09   11.36
  -4   3   5 8170.45   41.51
   4   3  -5 8052.59   35.99
  -4  -2   7  931.96   14.19
  -4   2   7  948.46   15.25
  -4   2   7  943.42   12.24
  -2   4   1 4208.66   27.83
  -2   4   1 3918.29   20.98
  -2  -4   1 4313.32   27.10
   2   4  -1 4613.82   24.56
  -2   4   1 3987.54   27.73
  -2  -4   1 4374.42   27.66
   3   0   6  551.81    9.87
  -4  -3  -2    6.08    3.15
  -4   3  -2    8.03    2.75
  -4   3  -2   10.91    2.60
  -2   4   0 3031.41   24.23
   2   4   0 2987.71   19.70
   3   2   5    1.68    3.00
   3   2   5    1.74    2.11
  -3   2  -5    2.93    3.25
   5   0   4  215.75    6.10
   4   2   4  710.51   11.97
  -4   2  -4  764.00   12.39
   4   2   4  714.86   10.85
  -4  -2  -4  759.15   12.63
  -4   2  -4  705.72   10.57
   1  -3   5   22.70    3.17
  -1   3  -5   19.82    2.65
  -1   3  -5   27.49    4.19
   1   3   5   14.38    3.26
  -5   3   0 6434.12   35.18
  -5   3   0 6386.32   31.09
  -4  -1   8  943.06   14.14
  -4  -1   8  950.08   10.58
  -2  -4   211423.60   47.72
  -2   4   211427.30   43.82
  -5   3   4  157.48    6.12
  -5   3   4  167.44    6.36
  -7   0   613095.50   52.84
  -7   0   612977.10   52.97
  -1  -1   823683.60   77.23
   1   1  -823428.60   74.42
  -7  -1   0  252.21    7.58
  -7   1   0  250.49    6.74
  -7  -1   0  253.32    5.21
  -5   0   8 1149.48   15.03
  -5   0   8 1160.06   14.44
   0   2   742461.20  117.89
   0   2  -743311.90  119.61
  -6   2  -1 2295.29   18.40
  -6   2  -1 2257.11   20.52
   6   2   1 2245.73   19.97
   1   4   2   14.07    2.44
  -1   4  -2   17.41    3.21
  -1   4  -2   14.03    3.80
  -1  -4  -2   18.58    2.96
   2   3  -6 3000.57   25.36
  -2  -3   6 2931.55   23.45
   4  -1   513726.80   49.01
   4   1   513619.00   56.40
  -6   1   7 1380.77   17.02
  -6   1   7 1363.46   14.63
  -6  -1   7 1341.70   17.16
  -2   4  -1  752.13   12.98
  -2  -4  -1  791.17   11.66
  -2   4  -1  776.30   12.18
   0   0   8  166.05    6.49
   2  -2   6 2159.17   16.98
   2  -2   6 2112.36   17.00
   1   3  -6   38.72    4.33
  -1   3   6   30.40    3.29
   1   3  -6   29.29    2.41
  -1   3   6   29.49    2.71
  -1  -3   6   26.68    3.07
  -1  -4   319739.60   60.82
   1   4  -320310.00   75.13
  -1   4   320916.30   57.79
  -1  -4   320204.80   61.54
  -1   4   320595.20   58.90
   3  -1   6  781.77   11.02
   3   1   6  847.82   13.50
  -3   3   6   60.37    3.14
  -3   3   6   63.86    3.29
   2   0   7    0.49    2.82
   5   2   3  171.28    5.63
  -5   2  -3  182.26    6.60
   5   1   411079.30   49.21
   5  -1   411242.40   40.51
   0   4   3  101.49    4.29
   0   4  -3   84.88    5.56
   7   0   1    1.39    2.06
  -7   0  -1   -0.07    1.97
   7   0   1    1.29    1.68
  -7   0  -1    0.40    2.10
  -7   0  -1    1.15    2.33
  -6  -2   6 6788.49   40.85
  -6   2   6 6729.22   39.40
  -2   4   3 2044.81   21.06
   2   4  -3 2086.17   20.79
  -7   2   3  279.70    8.09
  -7   2   3  297.57    7.15
  -3   4   1   78.70    3.38
  -3   4   1   80.94    4.95
  -3  -4   1   86.86    4.80
  -3   4   1   82.20    4.59
  -7   1   6   13.88    2.50
  -7   1   6   15.73    2.70
  -7   1   6   16.64    2.21
  -7  -1   6   17.45    3.61
  -7   1   6   13.45    3.38
  -7  -1   6   14.29    2.51
  -5  -2   711140.80   53.61
  -5   2   711055.90   54.38
  -7  -2   2  356.37    9.39
  -7   2   2  348.44    8.41
   6   0   3    0.03    2.02
  -3   4   2 2377.88   18.80
  -3  -4   2 2422.39   21.80
  -5  -1   8 9055.16   47.15
  -5   1   8 8899.64   47.64
  -5   1   8 9354.57   44.04
  -5  -1   8 9262.76   36.93
  -5   3  -1 2600.75   22.21
  -5   3  -1 2616.53   21.67
  -3   4   0 2493.43   21.76
  -3   4   0 2465.92   22.69
  -7  -2   4  443.33   10.42
  -7   2   4  465.78   10.05
  -7   2   4  459.85    8.52
  -5   3   511009.90   51.44
  -5  -3   511662.20   54.77
  -8   0   3    0.87    2.87
  -8   0   3    3.33    2.06
   0   1  -814218.00   59.19
   0   1   814026.40   59.33
   0   3   6  979.38   13.71
   0  -3   6 1000.30   12.30
   0   3  -6 1018.69   15.47
  -3   3  -4  272.91    7.56
   3   3   4  300.26    8.09
  -3   3  -4  273.44    8.68
  -3  -3  -4  298.51    8.54
   2  -1   717671.50   63.09
   2   1   717096.90   67.28
  -8   0   4  234.11    6.35
  -8   0   4  270.42    7.83
   2   4   2 2078.46   18.95
  -2   4  -2 2017.77   21.70
  -2  -4  -2 2122.47   20.07
  -2   4  -2 2174.48   18.48
   4   3  -6 1074.39   13.41
  -4   3   6 1098.61   16.19
  -8   0   2 2048.38   18.19
  -7   2   1 9794.67   45.60
  -7  -2   1 9822.16   49.06
  -1  -4  -3 5988.15   33.94
   1   4   3 5935.56   32.45
  -7   1  -1  759.71   11.82
  -7   1  -1  770.20    9.98
   7   1   1  750.36   12.09
  -7  -1  -1  781.20    9.98
  -3  -4   3  670.41   11.41
  -3   4   3  668.12   12.54
  -3   4   3  662.00   10.65
   3   4  -3  703.21   11.81
  -2   3  -5    8.29    3.04
   2   3   5   12.26    3.23
  -4   3  -3 2492.63   23.03
   4   3   3 2487.14   22.82
  -4  -3  -3 2443.87   23.70
   1  -2   7   28.03    3.11
  -1   2  -7   33.29    4.30
   1   2   7   33.47    4.19
  -6   3   2  437.69    9.36
  -6   3   2  436.60    9.22
  -6   1  -3 1769.68   18.42
  -6   1  -3 1773.93   17.33
   6   1   3 1794.51   18.22
  -6  -1  -3 1779.51   18.79
  -7   0   7    3.57    2.69
  -7   0   7    0.04    2.70
  -6   0   8 2859.21   24.06
  -6   0   8 2799.11   22.64
  -6   3   3   69.95    4.49
  -6  -3   3   71.16    5.01
  -3  -2   8  827.80   13.79
   3   2  -8  795.76   11.96
  -2  -2   8  208.98    6.98
   2   2  -8  207.52    7.02
  -2   2   8  221.51    6.99
  -1   4   4 1784.80   15.23
   1   4  -4 1716.38   20.19
  -1   4   4 1573.89   13.86
  -1  -4   4 1638.97   15.21
  -3   4  -1 1876.10   20.07
  -3   4  -1 1846.72   19.62
  -6  -2  -2  419.22   10.08
   6   2   2  411.91    9.75
  -6   2  -2  391.03    8.35
  -6   2  -2  382.36    8.95
  -3   0   9   -0.17    2.61
  -3   0   9    1.20    3.20
   3   0  -9    2.06    2.02
  -7   2   5 5332.31   34.36
  -7   2   5 5064.24   29.02
  -2  -4   4 1003.91   13.08
   2   4  -4  972.12   14.47
  -8  -1   313028.70   55.23
  -8   1   313308.40   56.88
  -8   0   5   -0.69    2.97
  -8   0   5    1.51    2.27
   1   0   8 1435.84   17.19
  -6   3   1   37.82    2.60
  -6   3   1   48.08    3.99
  -6  -3   1   47.52    5.06
  -6   3   1   44.89    4.01
  -8  -1   415707.40   61.81
  -8   1   416222.40   64.13
  -2   0   9   38.07    4.49
  -8   0   1    0.41    1.88
  -8   0   1    1.50    1.97
  -8   1   2  201.26    7.17
  -8  -1   2  137.69    6.09
  -4   0   9    0.09    3.30
  -4   0   9   -0.51    2.90
   0   4  -4 8577.11   46.79
   0   4   4 8558.01   39.68
  -6   3   4 1458.18   18.23
  -6   3   4 1501.39   17.07
   4   2  -825477.40   75.22
  -4  -2   825878.20   88.25
  -1   2   8 9772.65   47.87
  -1  -2   8 9854.34   47.64
  -7   2   0 2311.91   21.44
  -7   2   0 2279.74   21.21
  -4   4   2 1500.60   18.25
  -4   4   2 1494.01   15.19
  -7  -1   7   47.22    3.51
  -7  -1   7   48.28    4.69
  -7   1   7   40.88    2.95
  -7   1   7   42.84    4.47
  -7   1   7   43.25    3.53
   1   3   6   79.82    4.96
  -1   3  -6   69.57    5.47
  -1   3  -6   69.00    4.18
  -4   4   1 8203.74   35.44
  -4  -4   1 8272.91   43.95
  -4   4   1 7606.85   43.47
  -4   4   1 7580.66   38.35
   5   3   2   44.16    4.75
  -5   3  -2   46.08    4.12
  -5   3  -2   56.03    4.04
  -5  -3  -2   56.52    4.91
  -6   1   8 4746.51   30.25
  -6   1   8 4814.66   33.51
   4   0   6 4983.38   31.03
   4   2   5  464.61   10.72
  -4   2  -5  431.96   10.43
  -6   2   7   32.10    4.51
  -6   2   7   34.48    2.70
  -6  -2   7   32.43    4.72
  -7   0  -221263.00   71.29
   7   0   221675.50   67.33
  -3  -4   4 7043.06   38.39
   3   4  -4 6981.55   38.59
  -3   4   4 7138.37   42.12
  -3   4   4 7209.54   40.74
   3   1  -9 1727.71   16.62
  -3   1   9 1796.65   20.15
   5   0   5    3.22    2.35
   5   3  -611290.80   42.91
  -5  -3   611211.10   55.19
  -8   1   5 2563.67   24.21
  -8  -1   5 2330.02   21.83
  -2  -3   7 1284.32   16.57
  -2   3   7 1293.34   14.94
   2   3  -7 1316.91   17.26
  -2  -4  -3 1144.90   15.35
   2   4   3 1102.52   14.70
   3   2   6 5257.57   35.09
  -3   2  -6 5238.85   36.26
  -1   1  -8 8686.94   46.18
   1   1   8 8644.49   46.68
   1  -1   8 8753.66   44.61
  -6   3   0 2484.35   23.00
  -6  -3   0 2485.43   24.80
  -6   3   0 2430.99   19.51
  -1   0   9    1.90    3.63
  -3   3   7  178.08    5.67
  -3  -3   7  173.74    6.94
   3   3  -7  181.26    6.55
   2   1  -9 9896.50   46.44
  -2  -1   910036.40   50.06
  -4  -4   3 1646.78   18.92
  -4   4   3 1611.87   16.45
  -8   1   1 7359.50   38.13
  -8  -1   1 7554.28   40.56
  -4  -4   0 1571.32   19.24
  -4   4   0 1510.99   18.31
  -5   2  -4 7447.58   40.60
  -5  -2  -4 7307.74   43.47
   5   2   4 7332.15   42.01
  -4  -1   918194.30   69.70
  -4   1   918152.40   70.88
  -8   0   6 9685.56   46.64
  -8   0   6 9459.94   44.87
   3   4   2   79.34    3.88
   3   4   2   72.77    4.88
  -3   4  -2   78.07    5.20
  -3  -4  -2   73.18    5.05
  -3   4  -2   71.54    4.25
   3   0   7   -1.49    3.05
  -5   0   9   -0.37    3.06
  -5   0   9    0.36    2.63
   1   3  -7   84.52    3.57
  -1   3   7   89.65    5.19
   1   3  -7  106.09    5.83
  -1  -3   7  101.96    5.08
  -7   2   6  248.69    8.45
  -7   2   6  246.23    6.82
  -7  -2   6  263.24    8.90
  -1   4  -4 8590.12   37.68
  -1   4  -4 8492.96   49.06
  -6   3   5 3232.82   26.47
  -6   3   5 3214.65   26.35
   8   0   0 4931.44   26.87
  -8   0   0 4994.47   28.87
  -5  -2   8 8140.45   46.98
  -5   2   8 8084.72   47.78
   4  -1   6 3016.81   22.23
   4   1   6 2993.12   25.88
   7   1   2 3891.23   27.38
  -7  -1  -2 3854.80   28.37
   6   0   4 1534.81   16.45
  -5   1  -5 3484.00   27.75
   5  -1   5 3514.50   22.07
   0   2   8 1757.90   21.02
   0  -2   8 1719.17   18.77
   4   3  -7  188.47    6.17
  -4   3   7  199.10    7.78
  -4  -3   7  200.32    7.97
  -2   4   5    2.43    3.06
  -2  -4   5    2.17    1.86
   2   4  -5    2.04    3.42
   1   4  -5 1210.47   17.28
  -1   4   5 1174.70   13.72
  -1  -1   9 2124.38   21.46
  -1   1   9 2148.27   22.26
   2   2   715551.70   64.24
   2  -2   715428.70   55.97
  -2   2  -715367.50   66.26
  -3   3  -5 8363.70   47.74
  -3   3  -5 8247.39   43.39
  -4   4   4  170.66    6.40
  -4  -4   4  177.67    6.68
  -8   1   6 4672.06   33.77
  -8  -1   6 4511.26   33.00
  -4  -3  -410003.30   51.76
  -4   3  -4 9855.95   47.68
   4   3   4 9993.59   49.87
  -4   3  -4 9949.62   51.06
  -7   2  -115879.10   62.68
  -7   2  -115639.50   53.98
  -7   0   8  377.58    9.03
  -7   0   8  388.11    9.45
   3   1   7  293.41    8.89
   3  -1   7  285.33    7.57
  -5  -1   9  413.25   10.77
  -5   1   9  432.42    9.98
  -5   1   9  441.62   10.58
  -4  -4  -1   54.23    4.60
  -4   4  -1   51.63    4.34
  -4   4  -1   51.06    4.01
  -6  -2  -3    2.96    3.36
   6   2   3    2.81    3.29
  -6   2  -3    3.57    2.53
  -3  -4   5   29.05    3.46
   3   4  -5   32.54    3.69
  -3   4   5   31.19    3.83
  -8  -1   0 1066.07   14.50
  -8   1   0 1126.87   14.70
   0  -3   7   11.19    2.84
   0   3  -7   11.51    2.28
   0   3  -7   14.17    3.96
   0   3   7   13.72    3.46
  -6   3  -114203.70   59.42
  -6   3  -114648.10   55.08
   0   0   9    5.24    3.90
   2   0   8 9967.74   48.66
   0   4  -5 1523.02   20.44
   0   4   5 1496.57   16.43
   6   1   412435.20   53.91
  -6   1  -412100.50   51.86
  -8   2   3  266.37    8.25
  -8  -2   3  245.95    8.49
  -2   3  -6   64.62    5.40
  -2   3  -6   72.67    4.49
   2   3   6   72.29    5.03
  -8   2   4  472.55    8.58
  -8   2   4  453.68   10.46
  -8  -2   4  480.30   11.10
  -6   0   9    1.21    3.08
  -6   0   9   -1.20    2.69
  -5   3  -3  346.13    9.21
   5   3   3  333.05    9.12
  -5  -3  -3  343.99    9.74
  -5   3  -3  335.33    8.83
  -8   0   7    2.09    2.80
  -8   0   7    3.79    2.85
  -5   4   211911.00   49.18
  -5   4   212229.90   57.16
  -8  -2   217880.20   72.71
  -8   2   219443.40   72.12
  -7  -1   8 1533.99   19.59
  -7  -1   8 1543.60   15.69
  -7   1   8 1539.16   19.18
  -6   3   610622.30   52.36
  -6   3   610336.80   52.61
  -3  -4  -3  289.06    8.62
  -3   4  -3  303.48    7.88
  -3   4  -3  316.61    9.49
   3   4   3  301.68    8.57
   2   4   4  317.74    8.45
  -2   4  -4  303.46    7.34
  -7   3   3   73.32    4.82
  -7  -3   3   67.43    5.92
  -5   4   1 5714.54   30.06
  -5  -4   1 5172.76   37.49
  -5   4   1 5784.75   37.02
  -5   4   1 5169.68   30.46
  -5   3   7 1086.49   17.36
  -5  -3   7 1178.79   17.92
  -5   4   3 4114.63   28.20
  -5   4   3 4329.53   32.42
  -7   3   2 1259.69   16.29
  -7   3   2 1227.04   15.93
  -7   2   7 5194.96   32.22
  -7   2   7 5069.24   35.96
  -6   2   8  401.46   10.60
  -6   2   8  398.06    8.00
  -8   0  -1    1.94    2.15
  -8   0  -1    0.32    2.36
   7   0   3    5.85    2.37
  -7   0  -3    1.03    2.61
   0   1  -9  673.95   12.36
   0   1   9  689.01   12.85
   0  -1   9  685.96   12.73
   2   1   8 1737.28   21.67
  -2   1  -8 1740.82   21.18
  -3   2   9 5400.16   35.37
  -3  -2   9 5230.92   36.12
  -7   3   4    0.97    2.86
  -7   3   4    0.65    3.16
  -7  -3   4    0.82    3.62
  -4  -4   5  171.19    6.84
   4   4  -5  167.32    6.29
  -4   4   5  175.42    7.58
  -4   4   5  175.19    6.71
  -8   2   510095.50   41.93
  -8   2   5 9793.94   52.17
   1   2   8 1053.79   16.49
   1  -2   8 1040.12   14.42
  -9   0   3    3.60    2.25
  -9   0   4 1679.51   19.76
  -9   0   4 1566.35   16.54
  -4   4  -2  387.29    9.86
   4   4   2  389.44    9.98
  -4  -4  -2  388.96   10.32
  -4   4  -2  380.99    9.06
  -2   2   9   55.38    4.51
  -2  -2   9   57.88    4.71
  -6   1   916907.90   69.30
  -6  -1   916622.30   70.31
  -8  -2   1  489.21   11.27
  -8   2   1  498.70   10.78
  -8  -1   7 1009.56   15.72
  -8  -1   7 1056.35   13.95
  -7   3   1 2712.91   23.28
  -7  -3   1 3084.02   29.62
  -4   2   9 8235.33   50.30
  -4  -2   9 8128.42   46.94
  -1   4  -5 5635.90   30.20
   1   4   5 5565.12   34.24
  -5  -4   0  820.81   15.43
  -5   4   0  842.76   14.30
  -5   4   4 2380.45   22.12
  -5   4   4 2376.29   23.63
  -1   3  -7 5407.03   31.71
   1   3   7 5642.81   37.24
  -3   0  10 2883.61   24.87
  -3   0  10 2974.93   27.33
  -9   0   5    0.33    2.17
  -9   0   5   -0.59    3.46
   8   1   111744.50   51.02
  -8  -1  -111929.40   54.17
   7   1   3  101.35    5.22
  -7  -1  -3  109.16    4.67
  -7   1  -3  100.93    5.45
  -7   1  -3   98.73    4.83
  -2   4   613830.10   63.91
  -2  -4   613435.00   55.99
  -3  -3   810619.00   54.13
   3   3  -810494.50   51.31
  -4   2  -6    1.11    3.45
   4   2   6    2.88    3.46
  -7  -2  -214234.70   65.97
  -7   2  -214471.30   60.98
  -2  -3   8 1214.08   16.62
   2   3  -8 1219.01   17.21
   0   5   0   -0.97    3.25
  -4   0  10  757.26   12.68
  -4   0  10  763.90   14.37
  -6   3  -2 1026.29   14.97
  -6   3  -2 1008.58   15.39
   6   3   2 1036.00   16.44
  -6  -3  -2  993.36   16.37
  -5   2  -5 1933.99   21.89
  -5   2  -5 1934.98   20.97
   5   2   5 1903.82   21.90
  -7  -3   5  205.07    8.31
  -7   3   5  194.35    7.42
  -7   3   5  178.68    6.61
  -1   4   6 8439.07   41.39
   1   4  -6 9132.47   51.99
   0   5   1  505.19   10.60
   0   5  -1  475.14    9.75
   1   0   9    1.94    3.43
  -9   1   3   27.15    4.18
  -9  -1   3   18.15    3.46
  -9  -1   4 1353.47   17.80
  -9   1   4 1280.62   17.91
  -3   4   6   90.07    5.96
   3   4  -6   79.01    4.98
  -3  -4   6   81.48    5.18
  -2   0  10 1241.59   17.80
   2   0 -10 1306.83   16.05
  -1   2   9    2.50    2.96
   1   2  -9    4.69    3.20
  -1  -2   9    3.80    2.89
   1   5   011167.60   48.74
  -1   5   010974.40   52.77
   5   0   6 2067.14   20.75
  -1   5   120135.30   75.97
   1   5  -120583.20   69.18
  -8   2   6 1425.04   15.12
  -8  -2   6 1376.98   18.84
   4   0   7   -1.22    3.09
  -4   3   8 1768.35   16.68
  -4   3   8 1786.18   22.87
  -3   2  -7  602.32   13.07
   3   2   7  379.70   10.05
  -5   2   926178.90   84.95
  -5   2   926711.40   97.46
   1   3  -8 3366.55   32.21
  -1   3   8 3391.59   33.76
   1   3  -8 3366.84   29.70
  -1   3   8 3461.47   27.70
  -1  -3   8 3463.43   27.25
  -7   3   0 2222.25   22.98
  -7  -3   0 2093.22   24.41
  -7   3   0 2129.91   23.93
  -7   3   0 2224.28   24.96
  -7  -3   0 2060.33   22.96
  -3   1  10  504.24   11.81
  -3  -1  10  508.45   11.74
  -3  -1  10  532.41   12.34
  -3   1  10  505.99   11.39
  -3   1  10  483.89   11.46
   1   5   120901.20   84.79
  -1   5  -119539.70   77.17
  -1   5  -121772.10   76.50
  -1   5  -120376.80   78.97
   1   5   121104.30   71.47
  -7   0   9    1.12    2.63
  -7   0   9    1.86    3.29
  -9  -1   2 7085.46   40.99
  -9   1   2 6936.26   46.68
  -8   2   012128.70   55.24
  -8  -2   011916.40   57.18
  -9  -1   5 1702.38   19.55
  -9   1   5 1785.38   21.58
  -9   1   5 1656.86   21.10
  -9  -1   5 1717.12   20.80
  -9   1   5 1777.88   21.15
  -9   1   5 1578.87   22.01
  -5   0  10 1817.45   20.93
  -5   0  10 1727.62   21.63
  -5   4  -1 7265.14   43.19
  -5  -4  -1 6828.24   44.38
  -5  -4  -1 6895.46   43.07
   5   4   1 6822.39   42.79
  -5   4  -1 6711.50   43.94
  -5   4  -1 6559.99   39.19
  -5   4  -1 6915.71   44.69
  -5   4  -1 6998.01   42.69
  -5   4  -1 6639.86   39.84
  -8   0   8  210.81    7.21
  -8   0   8  194.21    7.21
  -4   3  -512220.60   61.21
  -4   3  -511660.40   58.90
  -4   3  -512344.30   56.24
  -4   3  -511938.30   56.94
  -4   3  -512668.80   66.21
  -4  -3  -511818.30   60.28
   4   3   511819.20   57.86
  -6   3   7  248.69    8.72
  -6  -3   7  260.57    9.36
  -6   3   7  244.58    8.81
  -6  -3   7  269.02    9.34
  -9   0   1    6.72    4.82
  -9   0   1    1.07    4.01
  -6   0  -5   -0.71    4.22
  -6   0  -5    8.13    4.80
   6   0   5    1.58    2.56
  -9   0   6  564.44   13.45
  -9   0   6  565.58   12.39
  -9   0   6  553.75   11.62
  -4   1  10 3680.95   29.67
  -4   1  10 3747.04   31.03
  -4   1  10 3652.30   30.71
  -4  -1  10 3662.92   32.29
   1   5  -2 2330.07   24.78
  -1   5   2 2268.66   23.17
  -1   5   2 2353.20   23.92
  -1   5   2 2301.16   26.08
   1   5  -2 2279.76   25.05
  -6  -2  -415937.30   69.72
  -6   2  -416169.70   69.63
  -6   2  -415938.80   67.01
  -6   2  -416065.60   71.00
   6   2   416001.40   67.62
   0   5  -2 1205.09   17.29
   0   5   2 1206.14   18.91
   0   5  -2 1104.28   17.35
   0   5   2 1113.24   16.25
   0   5  -2 1108.46   17.64
   0   5   2  997.89   14.90
   0   5  -2  996.85   15.92
  -5  -4   5  115.65    6.70
   5   4  -5  115.99    7.52
  -5  -4   5  108.43    6.18
  -5   4   5  108.80    6.54
  -5   4   5  107.68    5.64
  -5   4   5  118.41    7.82
  -5   4   5   95.53    5.74
   0   4  -6 4577.55   36.23
   0   4   6 4575.54   30.97
   0   4   6 4640.08   33.93
   0   4  -6 4510.47   37.80
   0   4   6 4765.70   39.91
   0   4  -6 4789.72   37.44
   0   4   6 4734.23   37.24
   0   4  -6 4886.49   34.36
   0   4  -6 5012.28   40.13
  -2   5   1 3378.11   29.21
  -2   5   1 3858.37   32.68
  -2  -5   1 3613.69   24.83
   2   5  -1 3735.42   30.32
  -2   5   1 3820.32   30.51
  -2   5   1 4012.41   34.08
   2   5  -1 3640.87   32.31
   2   5  -1 3839.06   31.66
  -3  -3  -6  126.41    6.94
  -3   3  -6  162.40    7.13
   3   3   6  123.77    6.26
  -3   3  -6  141.76    6.30
   3   3   6  136.44    6.67
  -3   3  -6  171.86    7.97
  -3   3  -6  125.97    6.87
  -3   3  -6  154.31    8.19
  -3   4  -4 1943.71   22.82
  -3   4  -4 1972.17   23.80
   3   4   4 2225.31   22.81
  -3   4  -4 2106.94   20.22
  -3   4  -4 2109.43   26.42
  -3  -4  -4 2086.28   23.34
  -3   4  -4 1961.97   22.08
  -3   4  -4 2309.96   24.14
   1   1   9  183.52    7.47
  -1   1  -9  186.13    7.52
   1   1   9  194.04    7.70
  -1  -1  -9  196.76    8.20
  -1   1  -9  196.38    7.92
  -2   1  10 5130.70   36.60
   2   1 -10 5105.13   38.11
   2   1 -10 5127.82   33.59
  -2  -1  10 5129.94   37.91
  -5  -1  -626913.10   96.23
  -5  -1  -627411.00   95.10
   5   1   628203.00   92.73
  -5   1  -626496.90   99.46
  -5   1  -627527.70   94.12
  -5  -1  -627327.00   93.31
   5   1   627335.90   90.67
  -5   1  -626913.70   99.65
  -5   1  -626525.90   90.34
  -5  -1  -627492.40   91.40
  -2  -5   0 2418.78   21.40
  -2   5   0 2343.83   24.11
  -2   5   0 2341.65   23.21
   2   5   0 2354.87   23.51
   2   5   0 2452.48   27.19
  -2   5   0 2529.79   26.32
  -2   5   0 2442.87   24.05
  -2   5   0 2515.72   26.15
   2   5   0 2306.99   20.32
   4   4  -6 2692.07   26.46
  -4   4   6 2601.75   27.48
  -4   4   6 2693.67   25.52
  -4   4   6 2793.64   30.32
   4   4  -6 2610.89   23.10
  -4   4   6 2676.33   26.33
   4   4  -6 2657.05   27.26
  -4  -4   6 2524.60   24.30
   5   3   4  258.22    8.77
  -5   3  -4  248.63    8.08
  -5  -3  -4  271.41    9.50
  -5   3  -4  255.36    8.77
  -5   3  -4  251.08    8.48
  -5   3  -4  266.14    9.24
  -5  -3  -4  260.73    9.32
  -5   3  -4  266.59    8.61
   1   0 -10 1090.62   17.53
  -1   0  10 1173.09   17.99
  -3   0  -8  292.76   10.52
   3   0   8  304.48    8.50
   3   0   8  279.70    8.74
  -4   1  -7 6811.18   41.91
  -4   1  -7 6691.64   44.43
  -4  -1  -7 6876.67   41.62
   4   1   7 6993.32   42.20
   4   1   7 6979.29   42.27
  -4   1  -7 6756.19   43.57
  -4  -1  -7 6786.97   44.08
  -4  -1  -7 6760.83   43.20
  -8   0  -210216.20   46.57
  -8   0  -210131.30   56.48
  -8   0  -210220.80   52.99
  -7  -2   8  185.32    8.31
  -7   2   8  186.58    7.58
  -7   2   8  187.27    8.82
  -7  -2   8  204.44    8.60
  -7   2   8  198.71    8.18
   2   5  -2 1066.28   16.39
  -2   5   2 1105.53   18.65
  -2   5   2 1056.92   16.45
  -2   5   2 1046.28   16.45
   2   5  -2 1032.74   16.85
  -2   5   2 1136.45   17.86
  -2   5   2 1113.78   18.58
   2   5  -2 1037.48   16.74
  -2   5   2 1041.84   15.98
  -2  -4  -5 1691.48   20.75
  -2   4  -5 1846.76   23.03
  -2   4  -5 1877.21   25.18
  -2   4  -5 1666.71   21.28
   2   4   5 1820.54   24.23
  -2   4  -5 1874.44   21.05
   2   4   5 1774.92   20.28
  -2   4  -5 1703.78   22.43
   2   4   5 1712.93   19.62
  -2   4  -5 1730.31   17.74
  -2   4  -5 1813.33   20.69
   2   4   5 1779.30   20.09
  -4   4  -313181.70   61.77
  -4   4  -313713.50   61.52
  -4   4  -313549.70   67.54
  -4   4  -313001.20   62.25
  -4  -4  -313480.80   63.08
  -4   4  -313556.80   64.58
   4   4   313217.80   60.10
  -4   4  -313685.70   61.63
  -4   4  -313171.50   56.99
  -4  -4  -313786.10   62.98
  -7   3   6  608.19   12.78
  -7   3   6  588.73   14.92
  -7   3   6  622.81   13.58
  -7   3   6  564.00   11.02
  -7   3   6  649.98   13.50
  -7   3   6  638.77   13.21
  -7   3   6  622.04   12.91
  -7  -3   6  569.91   12.85
  -7  -3   6  652.05   14.12
  -6  -4   2 5331.13   39.09
  -6  -4   2 5578.05   39.27
  -6   4   2 5386.16   41.56
  -6   4   2 5197.01   38.73
  -6   4   2 4946.80   34.84
  -6   4   2 5296.84   36.09
  -6   4   2 5161.48   42.02
  -6   4   2 4983.64   36.88
  -6   4   2 5402.26   36.45
  -6   4   2 5230.94   38.76
  -6   4   2 5342.93   40.88
  -6   4   2 5175.05   31.35
  -7  -1   9    3.77    3.86
  -7   1   9    4.95    4.18
  -7   1   9    6.23    3.12
  -7   1   9    3.94    3.16
  -7  -1   9    2.55    4.29
  -5   3   8 3347.15   32.95
  -5  -3   8 3104.51   30.39
   5   3  -8 3292.43   28.57
  -5  -3   8 3127.73   29.85
  -5   3   8 3352.59   31.16
  -5   3   8 3365.04   32.70
  -5   3   8 3364.37   29.48
  -5   3   8 3075.72   28.88
  -6   4   316280.30   74.57
  -6   4   316086.20   64.80
  -6   4   315951.80   65.17
  -6  -4   316174.00   71.36
  -6   4   316332.90   78.33
  -6   4   316220.40   66.44
  -6   4   315151.50   60.66
  -6   4   315545.20   71.79
  -6  -4   315695.20   73.13
  -6   4   315379.60   66.57
  -5   1  1018761.20   75.06
  -5   1  1018985.70   78.53
  -5   1  1018574.10   73.88
  -5  -1  1019482.10   79.02
  -5   1  1019555.40   74.80
  -5  -1  1019322.20   79.25
  -1   5  -2 1441.77   19.92
  -1   5  -2 1528.60   20.01
  -1   5  -2 1514.02   19.49
   1   5   2 1315.58   16.00
  -1   5  -2 1406.41   20.19
   1   5   2 1355.38   17.88
   1   5   2 1583.06   22.62
  -1   5  -2 1311.91   18.50
  -1   5  -2 1386.57   19.15
  -8  -1   8    4.06    4.18
  -8  -1   8    5.91    3.31
  -8  -1   8    1.21    2.15
  -8   1   8    2.68    3.41
  -8   1   8   -1.05    4.77
  -8   1   8   -0.92    4.04
  -8   1   8    2.21    3.36
  -8   1   8    0.95    2.24
  -8  -1   8    0.27    3.54
   0   2   9 9605.56   50.38
   0   2  -9 9350.28   48.12
   0   2  -9 9593.33   52.71
   0   2  -9 9344.34   49.65
   0  -2   9 9457.86   48.39
   0  -2   9 9263.65   46.86
   0   2   9 9322.33   50.91
  -9   1   1  977.16   15.41
  -9  -1   1  954.50   14.13
  -9  -1   1  999.46   15.40
  -9   1   1 1011.29   16.37
  -9   1   1  936.18   17.34
  -9  -1   1  997.00   16.40
  -9   1   1 1001.98   14.26
  -9   1   1  964.17   16.07
  -9   1   1 1033.20   15.68
  -9  -1   1  946.57   15.14
  -6   1  -5 4362.56   31.03
  -6   1  -5 4748.64   38.36
  -6   1  -5 4826.28   35.23
   6   1   5 4724.96   33.64
  -6  -1  -5 4873.09   36.36
  -6   1  -5 4880.82   33.89
   6   1   5 4740.09   32.53
  -6   1  -5 4733.61   37.43
  -6  -1  -5 4993.01   33.66
  -6   1  -5 4367.45   31.03
  -6  -1  -5 4722.31   34.19
  -9  -1   6  356.93    9.88
  -9  -1   6  328.13    9.57
  -9   1   6  332.05   10.88
  -9   1   6  365.99   10.79
  -9   1   6  342.04    9.81
  -9  -1   6  302.13    8.83
  -9  -1   6  355.18   10.55
  -9   1   6  335.16   10.63
  -9   1   6  320.33    9.38
  -2   2  -813995.70   66.12
  -2   2  -813730.20   63.92
  -2   2  -813632.90   67.83
  -2   2  -813862.20   66.89
   2   2   813490.10   63.39
   2  -2   813520.80   54.30
   2   2   813456.60   60.82
  -2   2  -813186.00   61.20
  -2  -2  -813520.50   61.59
  -2  -5  -1 2050.78   19.71
  -2   5  -1 2179.80   22.89
  -2   5  -1 2224.55   24.56
   2   5   1 2200.46   21.86
  -2   5  -1 2287.86   23.25
   2   5   1 2196.87   26.35
  -2   5  -1 2143.56   24.86
   2   5   1 2141.14   21.91
  -2   5  -1 1946.97   22.15
   2   5   1 2008.48   18.78
  -2   5  -1 2077.19   22.83
  -2   5  -1 2137.36   23.40
   0   3   8 6026.12   39.73
   0   3  -8 6290.23   43.52
   0   3   8 6122.27   46.06
   0   3  -8 6282.33   44.27
   0  -3   8 6335.32   36.27
   0   3   8 6539.39   41.97
   0   3  -8 6113.94   42.48
   0   3   8 6073.71   39.12
   0   3   8 6177.73   38.91
   1   5  -3    4.86    3.96
  -1   5   3   10.32    3.54
   1   5  -3   10.40    4.80
  -1   5   3   10.60    5.12
  -1   5   3   10.97    4.83
   1   5  -3   10.97    3.68
  -1   5   3   14.56    4.37
   1   5  -3    6.93    4.48
  -1   5   3   21.53    5.38
   1   5  -3    8.55    4.45
  -6  -4   1 8636.82   51.55
   6   4  -1 8962.16   52.45
  -6   4   1 8633.07   48.19
  -6   4   1 8594.29   39.93
  -6  -4   1 8822.46   51.35
  -6   4   1 9178.47   48.73
  -6   4   1 8712.08   50.38
  -6   4   1 8636.90   50.08
  -6   4   1 9314.32   54.33
  -6   4   1 8892.13   48.91
  -6   4   1 9013.25   54.63
  -6   4   1 8663.05   50.17
  -6   4   1 9013.57   53.11
  -2  -3  -7    0.96    3.84
  -2   3  -7    8.33    4.62
   2   3   7    3.63    4.11
  -2   3  -7    6.52    3.16
  -2   3  -7    1.63    4.44
  -2   3  -7    1.09    4.50
  -2   3  -7    2.05    3.97
   2   3   7    1.43    4.54
  -2   3  -7    1.02    3.57
   2   3   7    6.25    4.42
   2   3   7    4.07    3.42
  -2   3  -7    1.79    2.78
  -2   3  -7   19.20    4.75
  -6   2   9  907.55   17.67
  -6   2   9  891.64   16.28
  -6   2   9  943.95   16.10
  -6   2   9  959.89   13.20
  -6  -2   9  925.74   16.79
  -6   2   9  977.92   15.62
  -6  -2   9  950.58   17.08
  -7   0  -4 1205.81   18.70
   7   0   4 1249.12   14.48
  -7   0  -4 1268.11   17.27
  -7   0  -4 1188.67   17.96
  -7   0  -4 1217.23   16.01
  -8   2   7   95.42    7.20
  -8   2   7   91.62    6.30
  -8   2   7   90.42    6.17
  -8  -2   7  104.44    6.40
  -8  -2   7   81.90    6.52
  -8  -2   7   82.85    6.25
  -8   2   7   84.83    4.15
  -8   2   7   83.12    7.00
  -8   2   7   86.55    6.00
  -8  -2   7   87.79    5.71
  -6   0  10 2488.10   22.63
  -6   0  10 2537.87   25.99
   1   1 -10 5551.61   37.99
  -1   1  10 5542.15   39.58
  -1  -1  10 5678.50   38.38
   1   1 -10 5926.82   37.76
   1   1 -10 5626.90   39.16
  -1  -1  10 5903.50   40.26
  -3   1  -8 4740.60   39.23
   3  -1   8 4753.86   32.18
  -3   1  -8 4566.19   35.12
   3  -1   8 5018.69   32.54
  -3  -1  -8 4563.90   32.28
  -3   1  -8 4741.58   36.74
  -3  -1  -8 4736.80   35.66
  -3   1  -8 4779.42   35.32
  -3   1  -8 4749.47   33.19
   3   1   8 4810.55   35.37
  -8  -1  -2 2805.62   20.54
  -8   1  -2 2730.74   24.31
  -8   1  -2 2745.06   27.95
  -8  -1  -2 2834.33   25.80
  -8  -1  -2 2756.75   26.94
  -8  -1  -2 2760.08   24.99
  -8   1  -2 2827.32   29.07
   8   1   2 2871.92   24.45
  -8   1  -2 2890.17   27.01
   0   5   3 2524.29   23.85
   0   5  -3 2709.38   26.47
   0   5  -3 2581.81   27.08
   0   5  -3 2640.05   24.59
   0   5   3 2527.81   24.93
   0   5  -3 2625.80   26.98
   0   5  -3 2799.84   26.26
   0   5   3 2616.38   27.99
   0   5  -3 2578.82   27.68
  -6   4   4  415.34    9.76
  -6   4   4  392.97   10.43
  -6   4   4  375.37    9.21
  -6  -4   4  399.10   11.02
  -6  -4   4  407.27   11.37
  -6   4   4  409.26   11.82
  -6   4   4  371.23   11.74
  -6   4   4  373.62    9.99
  -6   4   4  371.76   13.02
  -6   4   4  381.13    9.93
  -7   3  -1 1496.09   20.02
  -7   3  -1 1536.76   20.25
  -7   3  -1 1437.65   21.00
  -7  -3  -1 1514.24   21.07
  -7  -3  -1 1547.03   17.97
  -7   3  -1 1512.57   19.19
  -7   3  -1 1593.91   21.06
  -7   3  -1 1523.04   20.78
   7   3   1 1488.52   19.76
  -7   3  -1 1646.50   20.84
  -7  -3  -1 1418.37   19.63
   2   5  -3 7019.01   41.53
  -2   5   3 6581.56   41.70
  -2   5   3 6416.22   40.63
  -2   5   3 7077.39   44.76
  -2   5   3 6866.82   44.02
  -2   5   3 6991.85   48.64
  -2   5   3 7518.01   46.42
   2   5  -3 6790.06   44.28
  -9   0   0 3579.54   28.06
  -9   0   0 3439.91   26.57
  -9   0   0 3326.65   24.11
  -9   0   0 3703.96   30.67
  -9   0   0 3252.54   31.05
   3   5  -1   65.82    5.20
  -3   5   1   72.31    5.00
  -3   5   1   84.60    6.42
  -3   5   1   78.78    5.29
  -3   5   1   80.29    5.67
   3   5  -1   70.77    5.92
  -3  -5   1   47.83    4.14
   3   5  -1   86.50    6.40
  -3   5   1   72.24    6.43
  -3   5   1   65.29    5.32
  -3   5   1   80.53    7.26
  -3   5   1   58.12    5.27
  -3  -5   1   53.79    4.77
  -9   0   7    1.49    4.64
  -9   0   7    6.29    3.61
  -9   0   7    0.13    3.23
  -9   0   7   -0.47    2.97
  -9   0   7   -0.11    4.23
  -9   0   7    0.57    1.85
  -6   3  -3 1096.98   18.51
  -6   3  -3 1047.79   15.24
  -6   3  -3 1107.77   16.96
  -6   3  -3 1138.43   15.65
  -6   3  -3 1104.23   16.40
   6   3   3 1110.11   16.80
  -6  -3  -3 1040.00   17.51
  -6  -3  -3 1079.10   17.13
  -6   3  -3 1077.81   17.63
  -6   3  -3 1064.96   17.61
  -6   3  -3 1189.32   19.06
  -6   3  -3 1096.88   17.21
   1   4   6   21.77    5.47
   1   4   6    2.25    2.90
   1   4   6    2.89    3.58
  -1   4  -6    3.93    5.00
  -1   4  -6    1.98    3.79
  -1   4  -6    2.34    3.72
  -1   4  -6    0.49    3.51
   1   4   6    6.67    4.97
  -1   4  -6    2.70    4.61
   1   4   6   -0.75    4.60
  -1  -4  -6    2.88    3.77
  -5  -4  -2 4465.20   34.63
  -5   4  -2 4451.06   32.59
  -5   4  -2 5206.19   37.85
  -5   4  -2 5046.71   39.10
  -5   4  -2 4462.41   32.14
  -5   4  -2 4613.33   37.18
   5   4   2 4341.75   33.36
  -5  -4  -2 4580.94   36.37
  -5   4  -2 4815.32   36.05
  -5   4  -2 5043.86   36.18
  -5   4  -2 4655.38   36.78
  -5   4  -2 4654.42   29.90
   3   5  -2 1862.26   22.14
  -3   5   2 1746.01   20.84
  -3   5   2 1895.08   24.16
   3   5  -2 1870.99   22.84
  -3   5   2 1805.41   21.82
  -3   5   2 1871.47   19.84
  -3   5   2 1844.43   22.30
  -3  -5   2 1799.52   19.43
  -3   5   2 1880.69   24.37
  -3   5   2 1752.62   20.57
  -3  -5   2 1748.22   19.65
   3   5  -2 1775.25   20.48
  -8  -2  -1   54.54    4.64
  -8   2  -1   52.34    5.82
  -8   2  -1   49.06    5.15
  -8  -2  -1   54.28    5.55
  -8  -2  -1   63.93    5.36
  -8  -2  -1   53.33    4.24
  -8   2  -1   57.94    5.00
  -8   2  -1   51.60    5.86
  -8   2  -1   57.37    5.92
   8   2   1   61.06    4.82
  -8   2  -1   57.17    5.59
  -8   2  -1   52.95    4.60
  -7  -2  -3   89.13    6.18
  -7   2  -3   82.59    6.31
  -7   2  -3   86.34    4.85
  -7   2  -3   79.12    5.27
  -7  -2  -3   91.83    5.51
  -7   2  -3   63.23    5.75
  -7   2  -3   71.37    5.94
  -7  -2  -3   99.96    5.99
   7   2   3   86.60    5.69
  -7   2  -3   66.15    5.75
  -7   2  -3   76.06    6.16
  -3  -5   0 1778.29   20.54
  -3  -5   0 1732.19   19.43
   3   5   0 1746.30   19.57
  -3   5   0 1857.90   21.41
  -3   5   0 1785.26   20.63
  -3   5   0 1559.32   20.54
   3   5   0 1779.87   21.00
  -3   5   0 1729.31   19.88
   3   5   0 1808.08   24.04
  -3   5   0 1908.82   23.53
  -3   5   0 1609.04   19.17
   3   5   0 1753.49   19.44
  -3   5   0 1705.81   20.38
  -8   3   3 7035.68   41.16
  -8   3   3 7267.25   42.09
  -8  -3   3 7348.50   47.21
  -8  -3   3 7216.09   44.90
  -8   3   3 7402.36   45.99
  -8   3   3 7328.47   40.22
  -8  -3   3 7660.52   48.58
  -8   3   3 7231.34   46.98
  -8   3   3 7464.00   43.23
  -8   3   3 7497.06   46.31
  -8   3   3 7910.61   51.26
  -8   3   3 7348.96   48.28
  -5   4   6 8409.12   47.81
  -5   4   6 8531.48   42.91
   5   4  -6 9231.20   54.61
  -5   4   6 8690.62   55.51
  -5   4   6 8811.10   47.03
   5   4  -6 8639.12   46.73
  -5  -4   6 8539.58   49.95
  -5   4   6 8151.05   48.50
  -5  -4   6 8002.68   48.29
   5   4  -6 9027.35   47.73
  -5   4   6 8429.36   50.35
  -5   4   6 8487.18   47.69
  -2   4   7 3190.34   30.73
  -2   4   7 2981.02   22.18
  -2  -4   7 3023.80   26.21
   2   4  -7 3203.90   30.90
  -2  -4   7 2947.40   25.15
   2   4  -7 3257.89   29.40
   2   4  -7 3446.63   33.60
   2   4  -7 3565.52   31.77
   2   4  -7 3529.24   29.86
  -2   4   7 3159.80   29.37
  -2   4   7 3303.94   30.58
  -2   4   7 3210.95   27.27
  -2   4   7 3234.44   33.84
  -9  -2   3 7476.09   39.98
  -9   2   3 7423.12   46.34
  -9  -2   3 7462.75   45.46
  -9   2   3 7263.55   46.76
  -9  -2   3 7477.75   44.13
  -9   2   3 7412.41   48.11
  -9   2   3 7421.15   44.02
  -9   2   3 7524.06   43.70
  -9  -2   3 7671.99   42.28
  -9  -2   3 7894.61   46.19
  -9   2   3 7558.29   46.74
  -9   2   3 7598.85   45.96
  -2   0  -9   -1.13    4.10
   2   0   9    8.83    4.25
   2   0   9    2.10    3.04
  -2   0  -9    0.29    3.27
  -9   2   4 1553.10   21.92
  -9   2   4 1522.16   19.62
  -9   2   4 1681.49   20.77
  -9   2   4 1741.00   22.67
  -9   2   4 1650.80   21.19
  -9  -2   4 1664.54   19.40
  -9  -2   4 1654.21   21.50
  -9  -2   4 1641.13   20.51
  -9   2   4 1665.41   21.83
  -9  -2   4 1545.72   20.99
  -6   4   0 9516.37   52.84
  -6   4   0 9192.71   52.22
  -6   4   0 9383.31   50.85
  -6   4   0 8921.83   54.07
  -6   4   0 9366.94   56.17
  -6   4   0 9520.86   51.33
  -6   4   0 8561.47   41.60
  -6   4   0 9812.88   54.71
  -6   4   0 9279.14   52.17
  -6   4   0 9223.98   48.55
  -6  -4   0 9154.90   52.33
  -6  -4   0 9425.93   52.29
  -3  -4   7 5130.13   35.81
  -3   4   7 4974.96   36.75
  -3  -4   7 5037.11   35.71
   3   4  -7 5177.28   39.52
   3   4  -7 5040.04   36.49
  -3   4   7 5149.02   37.87
   3   4  -7 4943.87   38.77
   3   4  -7 5088.74   38.56
  -3   4   7 5239.56   38.81
  -3   4   7 4923.50   32.94
  -3   4   7 5344.68   39.23
   3   4  -7 5425.53   36.51
  -3   4   7 5244.47   42.64
   0   0 -10 8722.58   45.04
   0   0  10 8621.59   50.00
   0   0  10 8737.69   50.19
  -8   3   4 6515.24   44.50
  -8   3   4 6345.91   47.20
  -8   3   4 6347.82   36.25
  -8   3   4 6296.36   39.90
  -8  -3   4 5933.05   42.59
  -8   3   4 6005.41   42.59
  -8   3   4 6177.14   41.38
  -8   3   4 6313.26   39.41
  -8  -3   4 6354.46   41.90
  -8  -3   4 6544.83   44.86
  -8   3   4 6022.49   38.55
   2   5   2 9328.77   44.61
   2   5   2 9687.68   44.56
  -2   5  -2 9620.71   50.29
  -2  -5  -2 9475.87   46.76
  -2   5  -2 9916.73   51.86
  -2   5  -2 9078.99   49.88
  -2   5  -2 9684.98   54.76
  -2   5  -2 9336.41   50.61
   2   5   2 9655.05   48.55
  -2  -5  -2 9442.68   47.39
  -2   5  -2 9948.40   50.96
  -2   5  -2 9686.61   52.19
   2   5   2 9203.61   56.74
   7   1   4 7717.28   42.64
  -7   1  -4 7558.77   49.03
  -7   1  -4 7658.07   43.98
  -7  -1  -4 6818.79   35.69
  -7   1  -4 8104.75   42.83
  -7   1  -4 7748.46   44.72
  -7  -1  -4 7378.24   45.13
   7   1   4 7453.10   41.81
  -7  -1  -4 7860.01   41.21
  -7   1  -4 7474.46   47.42
  -7  -1  -4 7422.16   42.79
  -7   1  -4 7238.03   39.83
  -7   1  -4 7696.20   45.24
  -6   1  10  459.06   11.19
  -6   1  10  489.59   11.36
  -6  -1  10  519.58   12.82
  -6   1  10  504.42   10.84
  -6   1  10  538.92   11.29
  -6  -1  10  540.20   12.79
  -6   1  10  501.26   11.44
  -8   3   2 3644.20   32.13
  -8   3   2 3646.61   27.55
  -8  -3   2 3634.23   32.78
  -8  -3   2 3856.36   34.10
  -8   3   2 3822.18   33.92
  -8   3   2 3512.84   32.54
  -8   3   2 3746.44   34.02
  -8   3   2 3894.87   34.05
  -8   3   2 3633.31   28.72
  -8  -3   2 3849.02   31.67
  -8   3   2 3813.21   30.40
   1   5   3  355.31   11.37
  -1   5  -3  337.71    9.96
  -1   5  -3  305.72   10.37
   1   5   3  245.92    6.84
   1   5   3  277.74    8.62
  -1   5  -3  314.18    9.66
  -1   5  -3  302.18   10.09
   1   5   3  361.89   10.53
  -1   5  -3  242.94    8.64
   1   5   3  235.69    7.31
  -1   5  -3  350.93    9.55
   3   5  -3  131.17    7.62
   3   5  -3  136.72    6.78
  -3   5   3  152.97    8.44
  -3   5   3  138.30    6.80
  -3  -5   3  156.85    6.21
   3   5  -3  141.01    7.07
  -3  -5   3  147.39    6.45
  -3   5   3  144.87    7.01
  -3   5   3  132.29    6.94
  -3   5   3  135.84    8.31
  -3   5   3  135.95    5.73
  -3   5   3  135.11    7.41
  -9   1   0 1804.19   23.73
  -9   1   0 1893.26   23.01
  -9  -1   0 1807.16   19.39
  -9  -1   0 1818.03   22.22
  -9  -1   0 1906.45   20.77
  -9   1   0 1861.43   21.22
  -9   1   0 1868.79   20.75
   9   1   0 1775.12   18.42
  -9  -1   0 1939.43   20.09
  -9   1   0 1920.63   22.24
  -9   1   0 1815.83   19.22
  -9  -1   0 1847.52   21.83
   1   4  -7 4081.07   35.53
   1   4  -7 4320.80   31.94
  -1   4   7 4297.62   38.32
   1   4  -7 4946.15   38.23
   1   4  -7 4339.87   36.88
  -1   4   7 4093.00   32.83
  -1   4   7 4355.29   30.16
  -1   4   7 4647.06   30.09
   1   4  -7 4613.09   38.63
  -1   4   7 4481.02   34.77
  -1   4   7 4324.56   34.91
  -9   1   7  896.67   16.75
  -9  -1   7  762.66   13.57
  -9   1   7  815.36   14.84
  -9  -1   7  865.60   16.36
  -9   1   7  697.33   15.62
  -9   1   7  848.54   15.87
  -9   1   7  830.44   14.79
  -9  -1   7  663.19   13.01
  -9  -1   7  918.00   13.69
  -9  -1   7  829.30   14.67
  -6   4   5   28.66    5.26
  -6   4   5   43.63    5.37
  -6  -4   5   21.42    4.89
  -6   4   5   26.20    3.83
  -6   4   5   30.34    6.44
  -6   4   5   21.38    4.01
  -6   4   5   27.12    4.15
  -6   4   5   26.96    4.47
  -6   4   5   27.77    5.35
  -6  -4   5   22.32    4.32
  -3   2  10  329.63   10.01
  -3  -2  10  307.35   10.01
  -3   2  10  302.94    8.83
  -3   2  10  318.32    8.28
   3   2 -10  297.45    8.10
  -3   2  10  310.88    9.20
  -3  -2  10  295.42    9.66
  -3   2  10  309.23   10.02
   3   2 -10  328.05   10.88
  -3   2  10  315.55   11.18
  -9   2   2   20.78    4.45
  -9  -2   2   18.51    3.74
  -9   2   2    9.04    3.62
  -9   2   2   14.70    4.18
  -9  -2   2   11.38    4.31
  -9   2   2   13.59    4.77
  -9   2   2   13.39    4.87
  -9  -2   2   15.98    4.00
  -9  -2   2   12.87    3.94
  -9   2   2   14.93    4.51
  -9   2   2   23.51    4.95
  -7   3   7  134.65    6.85
  -7   3   7  119.90    8.59
  -7   3   7  123.95    5.71
  -7  -3   7   98.64    5.43
  -7   3   7  105.80    6.13
  -7   3   7  140.61    7.58
  -7  -3   7  125.14    7.74
  -7   3   7  140.84    7.08
  -7   3   7  147.17    7.52
  -7   3   7  125.04    7.09
  -9   2   5 5515.94   40.50
  -9   2   5 5752.16   42.69
  -9   2   5 5558.87   38.23
  -9  -2   5 5283.93   38.28
  -9   2   5 5821.29   39.40
  -9   2   5 5596.82   41.40
  -9  -2   5 5771.85   37.09
  -9  -2   5 6019.54   39.58
  -9  -2   5 5640.70   39.59
  -9   2   5 5396.73   37.83
  -6   3   8 4511.95   31.84
  -6   3   8 4728.78   38.21
  -6   3   8 4570.30   35.88
  -6   3   8 4846.33   41.07
   6   3  -8 4775.23   35.44
  -6  -3   8 4712.75   37.75
   6   3  -8 4968.57   35.13
  -6   3   8 4959.63   37.20
  -6  -3   8 4961.85   38.93
  -6   3   8 4601.08   36.20
  -6   3   8 4818.79   34.80
   1   5  -420888.30   84.86
  -1   5   421805.40   86.48
   1   5  -421433.00   87.41
  -1   5   420623.40   85.21
  -1   5   421258.60   80.06
   1   5  -421812.60   76.15
  -1   5   420889.60   72.50
   1   5  -421368.10   76.95
   1   5  -421368.80   84.20
  -1   5   420862.60   80.75
  -8   0   9   -0.16    2.99
  -8   0   9    0.78    2.78
  -8   0   9    1.01    3.03
  -8   0   9    6.21    4.25
  -8   0   9   -0.64    3.44
  -3   5  -1 1100.55   16.65
  -3   5  -1 1064.63   16.48
  -3  -5  -1 1008.69   14.82
   3   5   1  916.21   13.67
  -3  -5  -1  995.84   15.50
   3   5   1 1061.34   15.22
  -3   5  -1  963.46   16.10
  -3   5  -1  914.78   15.13
   3   5   1 1008.94   18.58
  -3   5  -1 1078.53   17.75
  -3   5  -1  989.76   15.76
  -3   5  -1 1042.77   17.66
   3   5   1 1063.92   15.39
  -4   2  1015367.00   64.86
  -4   2  1015588.20   71.16
  -4   2  1015879.60   62.25
  -4  -2  1016855.40   72.79
  -4   2  1014999.00   73.14
  -4   2  1014745.30   60.69
  -4  -2  1015392.80   71.17
  -4   2  1016121.60   71.48
  -3   3   9  759.10   12.98
  -3   3   9  748.83   15.28
  -3   3   9  790.12   15.91
   3   3  -9  801.12   13.54
  -3   3   9  915.88   18.33
   3   3  -9  973.05   17.60
  -3   3   9  738.21   12.52
  -3   3   9  894.07   15.14
  -3   3   9  944.15   15.97
   3   3  -9  832.44   14.49
   3   3  -9  873.91   12.72
  -3  -3   9  754.37   14.27
  -3  -3   9  774.77   14.61
   2   5  -4  747.38   14.31
  -2   5   4  717.81   13.77
  -2   5   4  718.72   14.56
   2   5  -4  747.65   14.91
   2   5  -4  744.34   14.68
  -2   5   4  785.54   16.58
  -2   5   4  685.79   13.39
   2   5  -4  677.62   15.14
   2   5  -4  731.37   12.68
  -2   5   4  721.04   14.56
  -2   5   4  673.45   11.27
  -2   5   4  761.50   14.71
  -8   3   5 2799.94   28.94
  -8   3   5 2892.38   24.04
  -8  -3   5 3044.70   29.49
  -8   3   5 2976.70   28.69
  -8   3   5 2964.49   26.89
  -8  -3   5 2905.99   28.53
  -8  -3   5 2906.80   28.93
  -8   3   5 2836.41   26.77
  -8   3   5 2881.95   29.56
  -8   3   5 3001.71   32.10
  -8   3   5 2966.06   27.39
   4   4  -711995.60   53.29
  -4  -4   712066.10   58.45
   4   4  -711611.70   58.85
  -4  -4   711724.40   57.70
   4   4  -712052.30   59.35
   4   4  -711327.70   57.36
  -4   4   711630.20   59.72
  -4   4   711025.30   57.62
  -4   4   710850.20   58.14
  -4   4   711497.90   65.57
  -4   4   711546.50   50.20
  -4   4   711854.70   63.13
   4   4  -711775.10   59.57
  -1   3  -8 6426.23   43.82
  -1   3  -8 6371.08   46.10
  -1   3  -8 6053.90   37.64
   1   3   8 6560.22   42.14
   1   3   8 6358.13   47.15
   1   3   8 6343.27   38.82
   1   3   8 6493.27   41.33
  -1   3  -8 6414.27   44.22
  -1   3  -8 6316.23   33.88
  -1   3  -8 5943.67   35.38
  -1   2  -9   33.89    4.68
   1  -2   9   40.76    4.33
  -1   2  -9   50.74    5.11
   1   2   9   43.15    5.39
   1   2   9   42.74    4.74
  -1   2  -9   35.25    5.54
   1  -2   9   42.04    3.76
  -1   2  -9   37.92    5.18
  -2   1  -9  351.12   10.15
  -2   1  -9  344.78    9.68
   2  -1   9  346.33    9.47
  -2   1  -9  350.42    9.54
  -2   1  -9  349.72   10.17
   2  -1   9  364.86    9.48
   2   1   9  327.38    9.49
  -2  -1  -9  353.19   10.29
   2   1   9  321.71    9.89
  -2  -2  10  142.62    7.18
  -2   2  10  133.65    8.28
   2   2 -10  120.32    7.10
  -2  -2  10  159.95    7.14
  -2   2  10  152.51    7.35
   2   2 -10  128.86    6.08
   2   2 -10  160.36    6.81
   2   2 -10  136.20    5.93
  -5   2  -6 3923.11   31.56
  -5   2  -6 3685.99   33.54
   5   2   6 3673.70   30.21
  -5  -2  -6 3640.32   29.35
  -5   2  -6 4013.47   35.74
  -5  -2  -6 3813.85   28.57
  -5   2  -6 3430.62   29.31
  -5   2  -6 3816.60   28.26
   5   2   6 3762.77   31.48
  -5  -2  -6 3711.15   32.32
  -5   2  -6 3769.94   31.91
  -5   2  -6 3706.18   30.10
   0   1 -10    5.92    3.96
   0   1 -10   12.82    4.36
   0   1 -10    6.97    3.39
   0   1  10    4.48    4.20
   0  -1  10    7.49    4.28
   0  -1  10    6.22    3.06
   0   1  10    3.81    3.72
  -2  -3   9 1703.23   20.36
   2   3  -9 1666.98   23.03
  -2   3   9 1666.09   20.10
  -2  -3   9 1576.48   20.06
   2   3  -9 1634.89   21.28
  -2   3   9 1703.77   24.23
  -2   3   9 1583.16   18.98
  -2   3   9 1511.37   20.95
  -2   3   9 1628.57   18.94
   2   3  -9 1816.98   21.99
  -8   3   1 5540.28   39.93
  -8   3   1 5445.78   32.04
  -8  -3   1 5283.29   39.47
  -8  -3   1 5475.89   37.53
  -8   3   1 5323.36   39.94
  -8   3   1 5585.04   40.99
  -8   3   1 5464.65   39.31
  -8   3   1 5535.26   39.97
  -3  -4  -5 4693.88   36.18
  -3   4  -5 4784.13   37.37
  -3   4  -5 4879.22   35.10
  -3   4  -5 5082.20   35.48
  -3   4  -5 4925.56   41.25
  -3   4  -5 4786.20   31.82
  -3   4  -5 4909.90   34.72
   3   4   5 5167.07   36.62
   3   4   5 4841.92   35.17
  -3   4  -5 4957.39   38.38
   3   4   5 5414.05   37.48
   3   4   5 4851.30   32.06
  -4   3   9 2256.61   23.97
  -4   3   9 2259.10   25.99
  -4   3   9 2179.41   25.53
   4   3  -9 2130.59   20.57
  -4   3   9 2049.45   26.87
  -4   3   9 2349.59   25.35
  -4   3   9 2139.17   20.36
  -4   3   9 2075.69   18.79
   4   3  -9 2126.16   22.27
   4   3  -9 2103.33   26.18
  -4  -3   9 2159.51   25.02
  -4  -2  -7   40.78    4.40
  -4   2  -7   34.38    5.84
  -4  -2  -7   42.67    4.65
  -4   2  -7   42.61    5.35
   4   2   7   42.49    5.07
  -4  -2  -7   38.46    5.14
  -4   2  -7   42.57    4.88
  -4   2  -7   26.83    3.54
   4   2   7   29.40    4.30
  -4   2  -7   46.15    5.25
  -4   2  -7   39.62    5.80
  -4   4  -4 6435.33   40.88
  -4   4  -4 6596.16   47.23
   4   4   4 6449.38   41.48
  -4   4  -4 6325.77   40.87
  -4   4  -4 6125.42   37.39
  -4   4  -4 6076.08   40.69
  -4   4  -4 6521.98   43.87
  -4  -4  -4 6470.26   42.96
  -4   4  -4 6747.84   39.20
  -4   4  -4 6592.31   38.90
   0   5  -4 1366.96   18.89
   0   5  -4 1364.88   20.07
   0   5  -4 1413.11   21.35
   0   5  -4 1438.37   18.55
   0   5   4 1382.20   18.63
   0   5   4 1321.99   20.31
   0   5   4 1388.96   21.14
   0   5   4 1355.70   17.07
   0   5  -4 1452.68   18.91
   0   5  -4 1257.31   18.34
   0   5   4 1370.44   18.30
  -8   0  -3    0.50    2.62
  -8   0  -3   -0.51    3.33
  -8   0  -3    0.03    2.13
  -8   0  -3    7.51    4.31
  -8   0  -3    0.06    4.74
  -8   0  -3   -0.86    4.20
  -7   0  10  146.27    7.09
  -7   0  10  133.04    6.10
  -7   0  10  124.60    6.92
  -7   0  10  125.63    5.48
  -4  -5   2    1.77    3.04
   4   5  -2    4.22    4.69
   4   5  -2    5.71    4.41
  -4  -5   2    3.49    3.78
  -4   5   2    6.65    3.60
  -4   5   2    2.69    5.58
  -4   5   2    8.05    4.79
  -4   5   2    2.92    4.70
  -4   5   2    0.88    3.91
  -4   5   2    0.37    3.66
   4   5  -2    2.94    3.60
  -4   5   2    9.85    3.85
  -7  -2   9 7394.85   48.38
  -7   2   9 8038.43   46.32
  -7   2   9 7776.79   40.43
  -7  -2   9 7950.29   40.37
  -7   2   9 7841.26   53.18
  -7   2   9 8202.69   47.07
  -7   2   9 7246.65   44.07
  -7  -2   9 8716.67   51.68
  -4  -5   1  270.79    8.35
  -4   5   1  243.25   11.17
  -4   5   1  266.81    8.48
  -4  -5   1  265.09    8.72
  -4   5   1  265.06    8.59
  -4   5   1  256.69    9.40
   4   5  -1  256.68    9.24
  -4   5   1  240.74    8.34
  -4   5   1  262.72    8.57
  -4   5   1  266.26    7.79
   4   5  -1  262.92    9.56
  -4   5   1  274.68   10.21
   4   5  -1  258.63    7.81
   0   4   7 4949.47   41.14
   0   4   7 4908.24   37.00
   0   4  -7 4885.25   33.54
   0   4  -7 4653.86   37.19
   0   4   7 4859.12   37.36
   0   4  -7 4917.06   40.61
   0   4  -7 4842.08   38.26
   0   4   7 5023.03   33.29
   0   4  -7 5249.64   39.57
   0   4   7 5123.08   33.99
   0   4   7 4777.75   35.55
  -5   2  10  136.07    6.24
  -5   2  10  163.73    6.58
  -5   2  10  145.46    6.82
  -5  -2  10  168.93    8.02
  -5   2  10  135.85    7.79
  -5   2  10  138.90    7.52
  -5   2  10  157.66    7.65
  -5  -2  10  140.66    7.97
  -6   4  -1 3957.06   32.41
   6   4   1 3831.17   33.09
  -6   4  -1 4185.85   33.43
  -6  -4  -1 3970.76   34.85
  -6  -4  -1 4013.90   33.69
  -6   4  -1 4162.37   34.05
  -6   4  -1 4099.44   34.28
  -6   4  -1 4207.78   34.16
  -6   4  -1 4094.06   33.74
  -6   4  -1 4024.89   34.80
 -10   0   4  230.80    9.48
 -10   0   4  250.88    9.01
 -10   0   4  255.14    8.20
  -8  -2   8  524.13   12.75
  -8  -2   8  517.74   11.20
  -8   2   8  569.74   12.96
  -8  -2   8  562.38   13.84
  -8   2   8  510.31   11.39
  -8   2   8  475.08   13.89
  -8  -2   8  582.62   13.23
  -8   2   8  532.29   12.15
  -8   2   8  519.54   14.16
  -9   0  -1   10.49    4.30
  -9   0  -1    1.89    2.27
  -9   0  -1   -0.34    3.11
  -9   0  -1    2.56    4.53
  -9   0  -1    0.40    4.00
  -9   0  -1    3.58    3.36
  -4   3  -6  159.03    6.80
  -4   3  -6  167.48    7.40
   4   3   6  192.57    7.85
   4   3   6  143.93    6.98
  -4   3  -6  151.46    7.45
  -4  -3  -6  177.41    6.44
  -4  -3  -6  154.15    7.57
   4   3   6  166.84    7.54
  -4   3  -6  163.81    8.04
  -4   3  -6  161.68    6.35
  -4   3  -6  174.30    7.03
  -4   3  -6  162.32    8.24
  -4   3  -6  176.31    9.23
  -7   3  -2   -0.06    4.52
  -7   3  -2    1.78    4.24
  -7   3  -2    0.89    3.50
  -7   3  -2    1.02    2.25
  -7   3  -2    1.47    4.08
  -7   3  -2    7.45    4.30
  -7   3  -2    0.99    3.87
  -7  -3  -2    1.88    3.75
  -7  -3  -2    1.09    4.63
   7   3   2    2.18    3.31
  -7   3  -2   -0.55    3.92
  -3  -5   4 2201.81   21.16
  -3  -5   4 2126.65   21.26
   3   5  -4 2144.12   24.84
  -3   5   4 2278.58   23.55
  -3   5   4 2150.05   20.16
  -3   5   4 2109.03   24.15
  -3   5   4 2079.46   23.90
  -3   5   4 2273.85   26.15
  -3   5   4 2260.78   27.54
   3   5  -4 2250.91   24.57
  -3   5   4 2116.52   23.14
   3   5  -4 2257.55   21.44
  -9   2   1 3496.20   31.63
  -9  -2   1 3314.25   28.93
  -9  -2   1 3382.07   29.81
  -9  -2   1 3369.32   27.70
  -9   2   1 3481.28   30.28
  -9   2   1 3468.84   27.61
  -9   2   1 3366.56   31.89
  -9   2   1 3511.12   31.16
  -9  -2   1 3408.04   26.88
  -6  -2  -5   61.93    4.42
  -6  -2  -5   65.35    5.31
   6   2   5   61.06    5.59
  -6   2  -5   58.34    6.36
  -6   2  -5   63.24    4.58
  -6  -2  -5   67.83    5.63
  -6   2  -5   65.82    5.20
   6   2   5   81.03    5.63
  -6   2  -5   60.90    5.85
  -6   2  -5   60.15    6.32
  -6   2  -5   66.66    5.25
  -6   2  -5   60.74    5.96
  -9   0   8 2066.15   21.86
  -9   0   8 2120.42   22.28
  -9   0   8 2207.85   24.04
  -9   0   8 2147.97   22.29
  -9   0   8 2286.23   28.18
  -9   0   8 1952.01   21.27
  -8  -1   9 1847.32   22.22
  -8  -1   9 1898.28   19.77
  -8   1   9 1762.23   18.60
  -8  -1   9 1890.71   23.05
  -8   1   9 1913.15   21.46
  -8   1   9 1797.38   19.27
  -8   1   9 1925.94   19.92
  -9  -2   6 3024.80   26.72
  -9   2   6 3052.98   30.10
  -9  -2   6 2919.85   27.40
  -9   2   6 2896.26   26.90
  -9  -2   6 3048.24   29.08
  -9   2   6 3011.36   27.85
  -9   2   6 2976.85   31.28
  -9   2   6 3054.03   29.20
  -9   2   6 3178.92   29.36
  -9  -2   6 3171.35   28.29
  -4   0  11    1.52    3.62
  -4   0  11    2.78    4.26
 -10   0   3    0.22    3.84
 -10   0   3    9.32    3.89
 -10   0   3    1.38    4.53
  -3   0  11   -0.34    3.78
  -3   0  11    2.79    4.41
   5   3   5    6.79    3.89
  -5   3  -5    7.32    3.60
  -5   3  -5   10.68    3.54
  -5   3  -5    3.88    4.37
  -5   3  -5    9.18    3.53
  -5   3  -5    9.13    4.98
  -5   3  -5    9.31    5.23
  -5  -3  -5    8.84    4.66
  -5   3  -5    6.57    4.49
  -5   3  -5   16.00    4.45
  -5   0  -7    7.90    4.46
   5   0   7    7.33    3.10
  -5   0  -7    2.44    4.65
  -5   0  -7   -0.56    5.19
   5   0   7    6.20    3.60
  -5   0  -7    0.91    3.52
   2   4   6 1348.47   20.01
   2   4   6 1270.93   20.19
   2   4   6 1261.42   17.54
  -2   4  -6 1340.18   18.15
  -2   4  -6 1274.33   16.71
  -2   4  -6 1191.34   18.94
   2   4   6 1252.58   17.58
  -2   4  -6 1227.73   17.99
  -2  -4  -6 1219.56   18.14
  -2   4  -6 1315.60   19.99
  -2   4  -6 1352.22   21.84
   2   4   6 1263.75   17.70
  -2   4  -6 1179.98   14.98
  -2   5  -3 1760.74   21.17
  -2   5  -3 1696.50   20.81
  -2   5  -3 1748.28   21.48
  -2   5  -3 1767.11   21.69
   2   5   3 1588.63   17.98
  -2   5  -3 1570.83   20.47
   2   5   3 1757.78   24.22
  -2  -5  -3 1742.80   19.77
  -2   5  -3 1721.73   22.97
   2   5   3 1704.55   19.82
 -10   0   5   -1.16    4.02
 -10   0   5   -0.09    3.18
 -10   0   5    0.83    4.29
   1   3  -9 7379.10   46.44
  -1  -3   9 7229.36   41.99
  -1  -3   9 7204.15   40.89
  -1   3   9 7182.43   41.67
  -1   3   9 7396.16   51.47
  -1   3   9 7384.97   41.53
  -1   3   9 7136.73   41.41
  -1   3   9 7580.28   45.93
   1   3  -9 7247.04   45.30
   1   3  -9 7704.00   49.62
  -4   5   3 3847.18   30.76
  -4   5   3 4067.19   31.76
  -4   5   3 3875.61   28.13
  -4   5   3 4194.43   37.14
  -4   5   3 3911.99   32.06
  -4  -5   3 4105.20   31.83
  -4   5   3 3910.65   32.70
  -4  -5   3 3791.30   30.66
  -4   5   3 3904.55   36.83
   4   5  -3 3999.75   30.71
   4   5  -3 3952.95   30.20
   4   5  -3 4067.47   34.35
  -5  -4  -3 4159.72   34.26
  -5   4  -3 3927.34   35.37
  -5   4  -3 4273.56   33.00
  -5   4  -3 4055.82   30.94
  -5   4  -3 4010.35   33.30
  -5   4  -3 4070.69   35.26
  -5   4  -3 4096.76   32.89
  -5  -4  -3 4233.88   33.90
  -5   4  -3 4040.84   27.41
  -5   4  -3 4256.08   33.11
   5   4   3 4092.90   32.05
   6   0   617408.50   64.71
  -6   0  -617591.60   76.01
  -6   0  -618029.50   69.78
   6   0   618035.30   66.06
  -6   0  -617771.50   77.26
  -6   0  -617770.00   72.30
  -4   5   0 2152.40   23.06
  -4   5   0 2115.79   21.94
  -4  -5   0 2115.27   23.35
   4   5   0 2100.31   22.18
   4   5   0 2230.68   21.10
   4   5   0 2220.90   23.49
   4   5   0 2270.13   26.90
  -4  -5   0 2159.13   22.68
  -4   5   0 2192.67   23.02
  -4   5   0 2158.64   25.86
  -4   5   0 2157.65   25.16
  -4   5   0 2158.16   22.33
  -1   2  10    7.32    3.70
   1   2 -10    0.18    3.46
   1   2 -10    2.30    4.66
  -1   2  10    3.67    3.88
  -1  -2  10    6.23    3.30
   1   2 -10    4.33    3.42
  -1  -2  10    4.48    4.07
   3   2   8 3706.78   31.85
  -3   2  -8 3844.14   34.36
  -3  -2  -8 3960.35   31.25
   3   2   8 3782.68   31.54
  -3   2  -8 3912.19   32.03
  -3   2  -8 3839.92   32.29
  -3   2  -8 3925.71   35.48
  -8   3   6 6070.73   40.68
  -8   3   6 6190.06   41.14
  -8   3   6 5940.82   42.35
  -8  -3   6 6063.44   41.60
  -8  -3   6 5963.94   42.73
  -8  -3   6 5794.26   42.98
  -8   3   6 6240.85   47.61
  -8   3   6 6167.94   36.89
  -8   3   6 6310.05   40.21
  -8   3   6 5978.61   39.81
  -8  -2  -223133.30   79.24
  -8  -2  -222983.20   83.90
  -8   2  -224473.10   90.55
  -8   2  -223964.70   87.10
  -8   2  -223688.40   89.22
   8   2   223151.60   83.27
  -8   2  -222607.50   91.94
  -8   2  -223270.20   88.57
  -8   2  -223361.30   80.34
  -8  -2  -223401.80   86.86
  -8   2  -222532.80   81.81
   3   5   2   23.66    3.29
  -3   5  -2   21.41    3.94
  -3   5  -2   22.77    4.64
  -3   5  -2   32.95    4.97
  -3   5  -2   25.04    4.42
   3   5   2   28.89    6.14
  -3   5  -2   28.90    5.28
  -3  -5  -2   26.78    3.69
   3   5   2   20.18    4.00
  -3   5  -2   26.39    5.47
  -3   5  -2   27.18    4.14
  -3  -5  -2   26.67    4.49
  -3  -3  -7 1792.98   22.51
   3   3   7 2089.41   24.97
  -3   3  -7 1800.35   20.60
  -3   3  -7 1799.11   22.86
  -3   3  -7 1990.79   25.91
   3   3   7 1609.91   20.65
  -3   3  -7 1864.56   21.64
  -3   3  -7 1974.92   19.49
  -3   3  -7 1911.13   22.85
  -3   3  -7 2069.97   24.40
  -3  -3  -7 2018.14   20.97
   3   3   7 1858.14   22.46
  -3   3  -7 1840.95   20.81
  -6   4   6 5281.26   36.38
  -6  -4   6 5694.61   40.36
   6   4  -6 5591.15   34.67
  -6  -4   6 5548.91   40.39
  -6   4   6 5651.68   36.65
  -6   4   6 5124.33   36.28
  -6   4   6 5699.80   39.66
  -6   4   6 5590.00   39.17
  -6   4   6 5482.37   42.67
  -6   4   6 5595.14   32.78
  -6   4   6 5665.09   45.71
  -5   3   9 6824.76   47.98
  -5   3   9 6863.92   45.92
  -5  -3   9 6825.99   45.03
   5   3  -9 6910.52   39.24
   5   3  -9 6881.91   46.94
  -5   3   9 6814.59   48.47
  -5   3   9 6894.52   43.25
  -4   0  -859287.00  158.92
   4   0   859297.00  150.99
  -4   0  -859332.80  159.05
  -7   4   3 8382.24   43.22
  -7   4   3 8494.16   46.18
  -7  -4   3 9173.43   53.16
  -7   4   3 8766.83   51.12
  -7   4   3 8573.38   44.63
  -7   4   3 8527.97   52.95
  -7  -4   3 8662.37   52.18
  -7   4   3 8837.97   57.01
  -7   4   3 8818.22   47.27
  -8   1  -3 2074.34   22.95
   8   1   3 2125.49   21.12
  -8  -1  -3 2070.65   19.53
  -8   1  -3 2008.92   24.61
   8   1   3 2145.85   21.48
  -8   1  -3 2006.13   23.80
  -8  -1  -3 2049.57   23.10
  -8   1  -3 2009.43   20.95
  -8  -1  -3 2150.99   18.80
  -8  -1  -3 2051.98   21.28
  -8   1  -3 2039.64   25.03
  -7   1  10 1672.52   19.42
  -7  -1  10 1766.48   22.34
  -7   1  10 1715.92   19.90
  -7  -1  10 1659.17   21.99
  -7   1  10 1607.87   19.43
  -5   4   7  856.27   15.04
  -5   4   7  747.41   14.27
  -5   4   7  848.82   17.44
  -5   4   7  879.76   15.96
  -5   4   7  875.67   18.25
  -5   4   7  776.50   14.97
  -5  -4   7  740.73   13.83
   5   4  -7  827.21   14.77
   5   4  -7  835.96   15.60
  -5  -4   7  823.73   15.50
   5   4  -7  852.67   15.09
   1   5   4  291.84    8.40
   1   5   4  281.35    7.23
  -1   5  -4  366.77   10.21
   1   5   4  345.00   11.39
  -1   5  -4  296.24    9.56
   1   5   4  313.87    7.92
   1   5   4  308.71    9.68
  -1   5  -4  347.83   10.14
  -1   5  -4  349.00    9.98
  -1  -5  -4  292.92    8.12
  -1   5  -4  336.44   11.29
  -5   0  11   -1.17    3.34
  -5   0  11    1.20    4.27
  -5   0  11    0.37    3.63
  -7  -4   2  946.54   16.90
  -7   4   2 1022.44   16.63
  -7   4   2  973.74   15.50
  -7   4   2 1060.58   18.69
  -7   4   2  980.05   14.62
  -7   4   2  934.67   13.49
  -7   4   2  957.66   13.80
  -7   4   2 1063.98   18.57
  -7  -4   2  931.73   17.39
   7   4  -2 1015.83   16.55
  -7   4   2 1084.72   19.29
  -7   4   2  960.12   16.36
   2   0 -11   -0.97    3.94
   2   0 -11    0.52    2.52
   2   0 -11    0.75    4.40
  -8   3   0   18.17    3.99
  -8   3   0    4.68    4.12
  -8   3   0    0.17    4.50
  -8   3   0    1.06    4.80
  -8  -3   0    1.60    3.68
  -8   3   0    1.75    4.73
  -8   3   0    2.21    4.80
  -8   3   0    0.17    4.40
  -8  -3   0   16.74    4.04
   1   0  10 2173.36   23.91
  -1   0 -10 2229.25   24.57
   1   0  10 2237.55   24.60
 -10   0   2 5124.65   36.19
 -10   0   2 5000.19   35.77
 -10   0   2 5085.52   39.12
 -10   1   4 2752.89   26.56
 -10   1   4 2726.72   27.17
 -10  -1   4 2672.09   23.19
 -10  -1   4 2770.31   26.92
 -10   1   4 2755.95   25.52
 -10  -1   4 2647.99   24.66
 -10  -1   4 2575.08   23.84
 -10   1   4 2674.50   28.85
 -10   1   4 2724.42   26.50
 -10   1   4 2693.83   26.58
 -10  -1   4 2803.78   27.74
  -9   1  -1  604.24   13.27
  -9  -1  -1  587.49   10.79
  -9   1  -1  599.16   12.42
  -9  -1  -1  599.05   13.14
  -9   1  -1  578.00   11.22
  -9   1  -1  576.40   13.66
  -9  -1  -1  594.88   11.37
  -9   1  -1  569.47   12.88
   9   1   1  589.23   10.81
  -9   1  -1  555.25   11.18
  -9  -1  -1  580.00   11.54
  -9   1   812516.90   59.53
  -9   1   813131.80   63.01
  -9   1   812359.40   59.00
  -9  -1   812541.20   57.90
  -9  -1   812778.80   61.77
  -9  -1   813722.30   54.76
  -9   1   812744.50   66.89
  -9  -1   813326.20   68.33
  -9  -1   811950.80   59.81
  -9   1   813109.30   70.88
  -4  -1  11 6125.71   41.15
  -4  -1  11 6222.49   43.14
  -4   1  11 6082.81   40.35
   4   1 -11 6190.73   36.35
  -4   1  11 6128.37   44.06
  -6   3  -4  258.28    8.58
  -6   3  -4  272.12    9.74
  -6   3  -4  201.39    7.34
  -6   3  -4  233.27    8.99
  -6  -3  -4  208.43    8.49
  -6   3  -4  185.68    7.37
  -6   3  -4  227.39    9.50
  -6   3  -4  217.84    8.95
   6   3   4  180.72    7.71
  -7  -4   4 3336.17   31.43
  -7  -4   4 3286.66   32.12
  -7   4   4 3056.32   26.40
  -7   4   4 3314.76   27.25
  -7   4   4 3361.14   32.31
  -7   4   4 3152.26   27.76
  -7   4   4 3302.38   30.84
  -7   4   4 3425.13   34.74
  -7   4   4 3054.57   26.80
 -10  -1   3 1390.45   17.62
 -10   1   3 1402.65   19.21
 -10  -1   3 1377.13   18.98
 -10  -1   3 1430.95   17.85
 -10  -1   3 1599.14   19.16
 -10   1   3 1546.87   20.96
 -10  -1   3 1450.46   20.37
 -10   1   3 1411.29   21.12
  -3  -1  11   51.30    4.95
   3   1 -11   49.13    5.95
  -3  -1  11   49.48    5.56
  -3   1  11   48.57    4.80
   3   1 -11   46.66    4.82
  -3   1  11   48.57    5.15
  -3   1  11   52.50    4.96
  -5   1  -7   10.12    4.59
  -5   1  -7   12.93    6.04
  -5   1  -7    6.48    3.19
  -5  -1  -7   23.47    5.85
  -5   1  -7   15.95    3.65
  -5   1  -7   12.08    4.95
  -5  -1  -7    9.09    4.01
   5   1   7   11.17    4.34
   5   1   7   20.37    3.62
  -5  -1  -7   10.94    4.20
  -5   1  -7    7.99    3.56
 -10   0   6  148.59    6.69
 -10   0   6  150.95    7.24
 -10   0   6  154.03    8.11
 -10   0   6  144.89    6.91
 -10   0   6  136.28    7.58
  -2   5   5   99.26    6.68
   2   5  -5  106.26    6.83
   2   5  -5   67.76    5.21
   2   5  -5  105.33    6.14
   2   5  -5   72.84    6.49
   2   5  -5   99.70    7.14
   2   5  -5  101.31    5.59
  -2   5   5   72.59    4.70
  -2   5   5  114.75    8.36
  -2   5   5  102.50    6.58
  -2   5   5   88.60    6.67
  -2   5   5   70.90    5.54
  -2   5   5   76.38    6.65
 -10  -1   5 9437.23   52.69
 -10   1   5 9284.13   48.99
 -10   1   5 9429.33   51.99
 -10  -1   5 9074.12   47.88
 -10   1   5 9542.18   51.25
 -10  -1   5 9452.64   50.63
 -10  -1   5 9295.65   49.13
 -10   1   5 9372.86   50.89
 -10   1   5 9232.77   56.05
  -1   5   512220.40   60.32
   1   5  -512699.10   52.68
  -1   5   512163.90   59.18
   1   5  -512664.60   58.95
   1   5  -512882.10   61.01
   1   5  -512871.00   66.22
  -1   5   512379.70   63.80
   1   5  -511838.70   60.03
  -1   5   512911.10   62.93
  -1   5   512127.50   56.11
   1   5  -512100.60   61.56
  -6  -1  -6 5307.22   38.44
   6   1   6 5380.23   35.17
  -6   1  -6 5279.81   34.83
  -6  -1  -6 5282.99   35.02
  -6   1  -6 5244.45   40.18
   6   1   6 5186.85   35.73
  -6   1  -6 4983.96   40.27
  -6   1  -6 5220.25   37.23
  -6   1  -6 5361.88   32.41
  -6   1  -6 4815.93   33.76
  -6  -1  -6 5231.15   36.35
  -6  -1  -6 5252.74   38.11
  -6   1  -6 4683.86   32.81
  -7  -2  -4 2058.95   21.42
  -7   2  -4 1998.54   23.39
  -7   2  -4 1974.80   21.81
  -7  -2  -4 1956.52   23.28
   7   2   4 2043.08   22.21
  -7   2  -4 2042.52   23.08
  -7   2  -4 2047.08   24.50
  -7   2  -4 2119.07   23.03
  -7   2  -4 1928.62   20.42
  -7   2  -4 2019.01   24.96
  -6   2  1026778.90   87.50
  -6  -2  1027053.30  100.25
  -6  -2  1025826.00   97.55
  -6   2  1026270.80   94.70
  -6   2  1025521.20  100.78
  -6   2  1025845.30   95.45
  -6   2  1025945.60   83.09
  -6   2  1026020.50   83.87
  -4   5   4 6135.62   40.40
  -4   5   4 6581.58   42.44
  -4   5   4 6515.83   42.35
  -4   5   4 6318.70   35.65
  -4   5   4 6603.46   46.72
  -4   5   4 6509.51   41.91
   4   5  -4 6796.43   36.99
  -4  -5   4 6291.53   39.33
  -4  -5   4 6358.21   39.59
   4   5  -4 6578.89   41.13
  -4   5   4 6960.19   48.75
   4   5  -4 6864.45   45.40
  -7   4   1   32.94    5.51
   7   4  -1   43.19    5.85
  -7  -4   1   16.03    4.03
  -7  -4   1   22.51    5.37
  -7   4   1   29.47    5.24
  -7   4   1   25.76    6.09
  -7   4   1   38.39    6.31
  -7   4   1   33.89    5.97
  -7   4   1   21.59    3.97
  -7   4   1   28.95    5.83
  -7   4   1   34.93    5.63
  -7   0  -5   -0.14    2.88
  -7   0  -5    1.80    4.52
  -7   0  -5   -1.30    4.53
  -7   0  -5    0.21    3.58
  -7   0  -5   -0.71    4.19
  -7  -3   8  684.25   15.15
  -7   3   8  695.30   14.19
  -7   3   8  675.33   12.86
  -7   3   8  755.23   15.25
  -7   3   8  692.06   12.85
  -7  -3   8  722.20   15.57
  -7   3   8  726.76   16.52
  -7   3   8  657.42   13.44
  -7  -3   8  722.29   12.98
  -4  -5  -1  106.44    6.45
  -4   5  -1  128.43    7.03
  -4   5  -1  112.65    5.72
  -4   5  -1  128.44    6.76
  -4   5  -1  132.25    6.98
   4   5   1  142.81    6.42
  -4   5  -1  143.62    7.93
  -4   5  -1  155.30    7.87
  -4   5  -1  121.34    6.23
   4   5   1  100.74    5.39
   4   5   1  120.52    5.54
   4   5   1  160.92    8.51
  -4  -5  -1  104.32    5.74
   4   1   8 6882.31   42.35
   4   1   8 7008.14   42.32
  -4   1  -8 6422.89   40.91
  -4   1  -8 6685.99   43.46
  -4  -1  -8 6662.58   40.85
  -4  -1  -8 6566.41   44.99
   4  -1   8 6878.95   37.04
  -4   1  -8 6939.20   38.16
  -4   1  -8 6905.48   45.81
  -4   1  -8 7218.66   48.60
  -4  -1  -8 6745.38   42.46
  -9  -2   012970.80   60.60
  -9   2   013543.40   65.62
  -9   2   013347.70   66.09
  -9   2   013117.60   58.91
  -9   2   012975.00   58.97
  -9  -2   013354.90   56.33
  -9   2   013365.30   61.13
  -9   2   013706.10   63.61
  -9  -2   012870.20   61.99
  -9  -2   013420.20   55.80
   9   2   013150.40   59.71
  -9  -2   7    8.19    3.90
  -9  -2   7    0.35    4.39
  -9   2   7    5.92    4.33
  -9  -2   7   14.81    4.16
  -9  -2   7    5.27    3.62
  -9   2   7   10.76    5.63
  -9   2   7    9.00    4.85
  -9   2   7    4.96    4.46
  -5   1  11  656.05   12.62
  -5   1  11  676.32   13.89
  -5   1  11  651.65   13.11
  -5  -1  11  675.44   14.29
  -5   1  11  637.23   12.58
  -1   4  -7  114.61    6.92
   1   4   7  117.14    6.80
  -1  -4  -7  110.37    6.36
   1   4   7  118.38    6.31
   1   4   7  112.85    7.18
  -1   4  -7  115.06    5.88
   1   4   7  119.90    5.99
   1   4   7  106.93    7.18
   1   4   7  121.53    7.62
  -1   4  -7  111.30    7.35
  -1   4  -7  119.65    7.87
  -2   1  11 1227.80   17.90
  -2  -1  11 1283.71   18.74
   2   1 -11 1244.29   17.30
  -2   1  11 1306.93   18.88
  -2  -1  11 1278.01   18.97
   2   1 -11 1228.71   18.70
  -3  -5   5 4916.81   32.81
   3   5  -5 5280.76   39.23
   3   5  -5 5254.58   38.60
  -3   5   5 5382.15   43.98
  -3   5   5 5332.38   37.45
  -3   5   5 4938.41   33.22
  -3   5   5 5407.97   38.65
  -3   5   5 5512.35   39.56
  -3   5   5 5152.91   37.13
  -3   5   5 4886.49   36.42
  -1   1 -10    1.85    4.37
   1  -1  10   -0.55    2.96
  -1   1 -10    1.34    3.32
   1   1  10   -0.63    3.48
   1   1  10    0.50    4.00
  -1   1 -10   16.52    3.74
  -1   1 -10    5.49    3.83
   1  -1  10   -0.82    3.85
 -10  -1   217175.70   66.06
 -10   1   217467.80   64.83
 -10  -1   217250.60   69.48
 -10   1   217223.30   72.91
 -10  -1   217573.70   73.56
 -10   1   216928.60   76.65
 -10  -1   217286.20   64.84
 -10  -1   217155.00   68.24
 -10   1   216910.80   67.61
  10   1  -217182.10   64.20
 -10   1   216950.10   72.25
   3   4  -811068.10   59.48
   3   4  -811214.90   54.44
  -3  -4   810551.10   53.59
   3   4  -810893.20   53.40
  -3   4   811334.70   55.39
  -3   4   811219.10   65.93
  -3   4   810859.70   57.06
  -3  -4   810456.50   52.46
   3   4  -810853.30   58.09
   3   4  -810614.60   58.32
  -3   4   811001.10   58.68
  -3   4   810574.70   55.88
   0   3  -9 1446.62   21.61
   0   3   9 1419.15   22.66
   0   3  -9 1449.15   16.92
   0   3   9 1481.61   17.45
   0   3   9 1460.74   19.07
   0   3  -9 1463.71   16.10
   0   3   9 1498.51   19.33
   0   3  -9 1416.31   20.68
  -3   0  -9   -1.68    4.40
   3   0   9   -0.20    3.19
  -3   0  -9    2.34    3.79
   3   0   9   -2.07    3.75
  -2   4   8 3260.45   24.64
   2   4  -8 3567.45   33.00
  -2   4   8 3528.79   25.23
  -2  -4   8 3488.00   27.84
  -2   4   8 3537.25   32.39
  -2   4   8 3351.53   30.84
  -2   4   8 3295.90   34.48
  -2   4   8 3469.84   30.32
   2   4  -8 3399.73   27.47
  -2   4   8 3412.29   26.82
   2   4  -8 3458.29   32.35
   2   4  -8 3581.37   30.84
   2   4  -8 3446.70   32.44
  -2   3  -8 1335.86   20.50
  -2   3  -8 1517.33   18.11
  -2  -3  -8 1466.72   18.64
   2   3   8 1521.17   22.13
   2   3   8 1449.95   17.55
   2   3   8 1378.54   18.69
   2   3   8 1393.54   19.81
  -2   3  -8 1493.11   20.82
  -2   3  -8 1443.53   15.54
  -2   3  -8 1487.63   22.69
  -2   3  -8 1451.55   18.55
  -2   3  -8 1453.98   19.44
  -6   4  -210449.20   53.47
  -6  -4  -210313.90   55.58
  -6   4  -210601.10   55.80
  -6   4  -210387.90   52.57
  -6   4  -210186.30   55.20
  -6   4  -210026.60   55.17
  -6  -4  -2 9942.15   56.16
  -6   4  -210348.00   48.74
  -6   4  -210078.80   48.58
   6   4   210120.50   52.71
   0   5   5   56.27    4.46
   0   5  -5   52.40    5.16
   0   5  -5   51.02    4.91
   0   5  -5   59.17    6.36
   0   5  -5   47.06    5.58
   0   5  -5   38.16    5.14
   0   5  -5   35.24    4.85
   0   5   5   52.25    6.94
   0   5   5   35.92    5.52
   0   5   5   62.77    6.28
   0   5   5   69.86    5.05
   0   5   5   60.07    5.64
  -6   0  11   -0.22    4.11
  -6   0  11   -0.81    3.38
  -7   4   5 4891.48   35.25
  -7  -4   5 4893.28   38.70
  -7   4   5 4957.45   38.89
  -7   4   5 4906.93   35.52
  -7   4   5 4883.97   31.74
  -7  -4   5 4974.99   38.96
  -7   4   5 4981.51   38.08
  -7   4   5 4836.84   30.47
 -10  -1   6    3.21    4.28
 -10  -1   6    4.84    3.59
 -10   1   6    3.15    4.38
 -10  -1   6    1.86    4.42
 -10   1   6    2.47    3.34
 -10   1   6    6.33    4.11
 -10   1   6    5.52    3.73
 -10  -1   6    9.33    3.22
 -10   1   6    1.61    5.04
   1   0 -11    4.65    4.59
   1   0 -11   -0.23    2.77
  -1   0  11    1.32    3.43
  -1   0  11    3.20    4.16
   1   0 -11   -0.64    3.47
 -10   0   1    2.63    4.46
 -10   0   1    2.66    3.63
 -10   0   1   -0.35    3.38
 -10   0   1   -0.92    4.06
  -2  -2  -9 4710.39   35.35
  -2   2  -9 4553.66   34.24
  -2   2  -9 4644.73   36.77
   2   2   9 4409.26   34.69
  -2   2  -9 4261.32   34.25
  -2   2  -9 4691.58   35.52
   2   2   9 4315.24   34.62
   0   2 -10 6715.22   42.20
   0   2  10 6573.39   42.39
   0   2  10 6793.17   42.90
   0   2 -10 6866.54   41.01
   0  -2  10 6667.50   38.41
   0  -2  10 6913.21   40.77
   0   2 -10 6550.27   41.40
   0   2 -10 6730.11   43.92
  -6   3   9 1355.60   19.40
  -6   3   9 1366.36   19.72
  -6   3   9 1316.45   18.67
  -6  -3   9 1259.32   20.02
  -6  -3   9 1210.69   15.12
  -6   3   9 1221.32   20.77
  -6   3   9 1305.58   20.06
   6   3  -9 1373.87   18.85
  -6  -3   9 1451.14   20.83
   6   3  -9 1274.39   16.97
  -8  -3   7 1128.54   18.14
  -8   3   7 1150.67   17.94
  -8   3   7 1252.92   21.69
  -8   3   7 1178.09   15.39
  -8   3   7 1251.53   17.92
  -8   3   7 1195.98   17.65
  -8  -3   7 1253.15   19.83
  -8   3   7 1248.70   18.14
  -8  -3   7 1256.69   19.44
  -8   3   7 1223.22   18.09
  -5   5   2  384.98   11.53
  -5   5   2  445.90   10.18
  -5   5   2  341.81   12.38
  -5   5   2  429.49    9.82
  -5   5   2  495.19   11.64
   5   5  -2  375.69   10.40
  -5  -5   2  607.98   13.14
  -5  -5   2  476.74   11.69
   5   5  -2  410.49   11.55
   5   5  -2  464.75    9.37
  -5   5   2  433.93   10.52
  -5   5   2  375.54   11.63
  -7  -1  -5  375.82    9.84
  -7  -1  -5  339.76    8.81
  -7   1  -5  382.83    9.91
   7   1   5  370.90    9.54
  -7   1  -5  322.53    9.69
  -7   1  -5  364.01    9.13
  -7  -1  -5  358.18   10.75
  -7  -1  -5  359.22   10.47
   7   1   5  386.17    9.27
  -7   1  -5  382.43   11.40
  -7   1  -5  330.97    9.87
  -7  -1  -5  336.71    7.95
  -7   1  -5  330.59   11.05
  -4   4   8 8095.55   49.51
  -4   4   8 8254.04   48.91
  -4   4   8 8022.73   49.05
  -4  -4   8 7974.20   47.53
   4   4  -8 8301.62   50.56
   4   4  -8 8282.55   49.07
  -4   4   8 8245.56   47.90
   4   4  -8 8122.31   45.65
  -4   4   8 8088.68   54.77
  -3   5  -3 8949.29   53.28
  -3   5  -3 9260.81   45.71
   3   5   3 9170.95   45.17
  -3   5  -3 9203.44   48.62
  -3  -5  -3 9108.25   48.51
  -3   5  -3 9073.84   48.90
  -3   5  -3 8806.69   48.93
  -3   5  -3 9395.13   51.86
   3   5   3 9411.52   57.53
   3   5   3 9257.60   46.63
  -8   0  10 1698.75   19.41
  -8   0  10 1693.11   20.82
  -2   5  -4   22.37    4.91
   2   5   4   18.68    5.82
  -2   5  -4   30.42    4.63
   2   5   4   22.47    4.57
  -2   5  -4   23.19    5.26
   2   5   4   23.55    3.73
  -2   5  -4   27.79    4.65
  -2  -5  -4   27.30    3.87
   2   5   4   28.56    4.49
  -2   5  -4   29.32    4.87
 -10   0   7    1.12    4.04
 -10   0   7    2.94    4.34
 -10   0   7    0.18    2.81
 -10   0   7    1.50    4.54
 -10   0   7   13.33    4.40
  -5   5   124314.00   75.96
  -5   5   124683.50   87.57
  -5   5   125255.60   97.76
  -5   5   125315.90   89.60
  -5   5   124836.10   89.14
  -5   5   124917.50   93.66
  -5  -5   123587.60   85.28
   5   5  -125043.20   92.90
   5   5  -125219.30   90.23
  -5  -5   124702.70   89.67
  -5   5   124162.00   81.58
  -5   5   123797.00   85.60
   1   4  -8 1030.12   18.26
  -1   4   8 1008.44   19.02
   1   4  -8 1110.89   18.54
   1   4  -8 1014.09   14.59
   1   4  -8 1089.03   19.05
  -1   4   8 1008.72   16.53
  -1   4   8  992.91   15.36
  -1   4   8 1043.08   17.42
   1   4  -8 1092.09   17.98
  -1   4   8  989.31   14.13
  -7   4   015613.00   68.45
  -7   4   015421.50   70.34
   7   4   015524.80   69.21
  -7   4   015470.10   71.88
  -7  -4   014943.20   70.53
  -7  -4   015343.30   69.26
  -7   4   015077.90   69.63
  -7   4   016035.10   71.41
  -7   4   015433.10   62.05
  -7   4   014900.70   61.72
  -7   4   015458.30   69.86
  -9   0  -2  655.11   12.08
  -9   0  -2  664.55   14.07
  -9   0  -2  642.87   13.37
  -5   5   3 1057.15   16.86
  -5   5   3  978.63   19.05
  -5   5   3  996.00   15.99
  -5   5   3 1032.40   15.29
  -5   5   3 1032.63   15.51
  -5   5   3 1005.11   14.47
  -5   5   3 1008.45   18.34
   5   5  -3 1063.91   15.44
  -5  -5   3 1029.32   17.00
   5   5  -3 1040.61   17.72
   5   5  -3  989.17   13.80
  -9   0   9   -1.34    3.34
  -9   0   9   -0.04    3.26
  -9   0   9   -4.45    5.37
  -9   0   9   -0.84    4.14
  -8   3  -1 8385.23   46.91
  -8   3  -1 8178.76   50.40
  -8   3  -1 8362.31   47.05
  -8   3  -1 8123.92   49.59
  -8   3  -1 8166.97   47.18
  -8   3  -1 8383.07   49.80
  -8  -3  -1 8239.89   49.31
  -8  -3  -1 8121.70   40.04
  -8  -3  -1 7901.71   47.49
  -8   3  -1 8213.78   48.30
  -7  -3  -3 7932.71   48.12
   7   3   3 7871.71   46.27
  -7  -3  -3 7657.42   47.77
  -7   3  -3 7749.80   44.44
  -7   3  -3 7885.06   47.79
  -7   3  -3 8108.50   47.47
  -7   3  -3 7764.00   46.94
  -7   3  -3 7711.88   49.97
  -7   3  -3 7917.12   47.55
   4   4   5  569.65   12.65
  -4   4  -5  581.20   13.71
  -4   4  -5  642.11   15.07
  -4  -4  -5  592.40   13.34
  -4   4  -5  601.92   11.55
   4   4   5  656.39   13.06
  -4   4  -5  603.66   12.61
  -4   4  -5  545.16   12.64
  -4   4  -5  592.61   12.34
   6   4  -7 1346.88   20.02
   6   4  -7 1313.93   17.63
   6   4  -7 1387.64   17.74
  -6   4   7 1402.36   21.32
  -6   4   7 1420.92   22.31
  -6   4   7 1380.88   18.52
  -6   4   7 1183.34   19.16
  -6   4   7 1298.72   17.83
  -6   4   7 1245.61   17.24
  -6   4   7 1258.14   17.66
  -6  -4   7 1297.65   19.77
  -3   1  -9  711.80   14.18
  -3  -1  -9  638.51   11.40
   3   1   9  641.06   13.12
   3  -1   9  687.87   12.35
  -3   1  -9  650.86   13.10
  -3   1  -9  673.19   13.94
  -3  -1  -9  731.37   13.93
  -3   1  -9  696.78   12.18
   3   1   9  659.99   12.79
  -8  -2   9 2552.36   27.21
  -8   2   9 2339.12   22.59
  -8  -2   9 2628.22   27.28
  -8   2   9 2546.37   29.18
  -8  -2   9 2325.33   26.69
  -8   2   9 2204.16   28.45
  -8   2   9 2438.87   26.20
  -8  -2   9 2308.38   21.79
  -8   2   9 2319.24   24.60
  -6   1  11  541.44   11.98
  -6  -1  11  569.43   13.51
  -6   1  11  576.87   10.53
   4   5  -5  296.62    9.30
  -4   5   5  266.12    8.68
  -4   5   5  269.94   10.54
  -4   5   5  256.63   10.68
  -4   5   5  282.79    9.31
  -4   5   5  296.20    9.55
  -4  -5   5  290.81    8.95
   4   5  -5  282.94    9.94
  -1  -1  11  175.95    7.87
  -1   1  11  175.39    8.02
   1   1 -11  167.37    7.31
   1   1 -11  158.98    7.59
  -3   4  -6  368.17    9.95
  -3   4  -6  358.67   12.10
   3   4   6  350.25    9.93
  -3   4  -6  338.97    9.50
  -3   4  -6  324.25   10.72
   3   4   6  369.11   10.15
   3   4   6  366.40    9.17
  -3  -4  -6  379.03   10.63
  -3   4  -6  338.47    9.36
 -10   1   1 9339.82   49.71
 -10  -1   1 9415.87   48.14
 -10  -1   1 9386.05   45.55
 -10   1   1 9515.96   48.42
 -10   1   1 9178.26   52.02
 -10  -1   1 9102.14   49.07
 -10  -1   1 9335.67   51.06
 -10   1   1 9453.42   47.76
  -9  -3   3 7770.39   49.19
  -9  -3   3 8185.44   46.08
  -9   3   3 7885.01   49.77
  -9   3   3 8169.74   50.54
  -9   3   3 7890.31   42.73
  -9   3   3 8050.05   48.56
  -9  -3   3 8339.87   39.17
  -9   3   3 8319.78   50.43
  -9   3   4  241.94    8.54
  -9   3   4  259.13    9.39
  -9  -3   4  235.07    9.52
  -9   3   4  272.84   10.16
  -9   3   4  282.37    9.87
  -9   3   4  276.50    8.14
  -9   3   4  299.01   10.71
  -9  -3   4  289.50    9.66
  -4   5  -2 1800.22   22.39
  -4   5  -2 1855.17   20.73
  -4   5  -2 1899.77   22.02
  -4   5  -2 1880.21   22.55
  -4   5  -2 1878.38   21.52
  -4   5  -2 1817.16   20.04
   4   5   2 1857.12   18.32
  -4  -5  -2 1823.07   21.54
  -8   0  -4 8423.57   49.96
  -8   0  -4 8331.49   44.45
  -5   4  -4  200.74    7.31
  -5   4  -4  216.35    8.37
  -5   4  -4  207.89    8.24
  -5   4  -4  260.22    9.90
  -5   4  -4  234.75    9.64
  -5  -4  -4  163.20    7.89
  -5   4  -4  243.05    8.10
  -1   5  -5  445.13   10.52
  -1   5  -5  449.49   11.52
  -1   5  -5  466.91   11.21
  -1   5  -5  499.90   12.23
  -1   5  -5  485.02   13.35
   1   5   5  498.86   12.89
   1   5   5  466.57   12.62
  -1  -5  -5  472.52   10.19
   1   5   5  483.23   11.24
   1   5   5  492.02    9.81
  -5   5   0 9833.36   58.14
  -5   5   010868.30   54.68
   5   5   010702.20   53.13
  -5  -5   010890.50   56.63
  -5   5   010725.60   48.54
  -5   5   010312.70   53.65
   5   5   010902.40   59.35
  -5   5   010324.20   48.40
  -5   5   011627.30   56.07
  -8   1  10   16.87    4.19
  -8   1  10   15.73    3.62
  -8  -1  10   21.49    4.88
  -8  -1  10   24.60    3.26
 -10   1   7  756.93   15.84
 -10  -1   7  761.54   14.91
 -10  -1   7  750.61   13.55
 -10   1   7  773.91   14.78
 -10  -1   7  766.46   13.70
 -10   1   7  761.12   15.48
 -10  -1   7  771.83   14.19
   5   5  -4  940.48   13.92
  -5  -5   4  902.59   15.29
   5   5  -4  971.54   17.22
  -5   5   4  952.51   15.36
  -5   5   4  942.90   15.15
  -5   5   4  846.76   17.72
  -5   5   4  965.51   15.69
  -5   5   4  893.49   17.53
  -8  -2  -3  207.94    7.52
  -8   2  -3  187.75    7.69
  -8   2  -3  179.70    7.92
  -8   2  -3  184.11    8.03
  -8   2  -3  148.89    7.84
  -8  -2  -3  166.40    7.53
  -8   2  -3  177.84    8.40
  -7   2  10  868.78   15.20
  -7   2  10  861.45   14.91
  -7   2  10  871.89   17.57
  -7  -4   6 3166.35   30.27
  -7   4   6 3129.09   25.05
  -7   4   6 3035.13   30.28
  -7   4   6 3084.97   33.46
  -7   4   6 3008.61   29.23
  -7   4   6 2988.60   27.90
  -9  -1  -215693.50   68.87
  -9  -1  -215874.90   69.12
  -9   1  -215841.80   73.97
  -9   1  -215856.90   70.70
  -9   1  -216088.30   70.11
  -9   1  -216367.20   67.29
  -9  -1  -216358.20   62.40
  -3   3  10  713.23   12.47
   3   3 -10  703.01   12.78
  -3  -3  10  727.16   14.06
   3   3 -10  750.21   15.94
  -3   3  10  753.45   16.80
  -3   3  10  720.43   12.84
  -9  -1   9   39.56    5.38
  -9  -1   9   41.46    4.29
  -9  -1   9   44.00    6.07
  -9   1   9   42.86    4.43
  -9   1   9   42.08    6.59
  -9   1   9   50.96    5.37
  -9   1   9   39.30    6.33
  -9   3   214602.40   57.42
  -9  -3   215512.60   64.47
  -9   3   214803.30   66.64
  -9  -3   215603.90   70.10
  -9   3   215101.10   69.99
  -9   3   215348.90   70.13
  -9   3   215525.50   70.43
  -9   3   215605.70   71.67
  -9   3   5 3363.27   30.29
  -9  -3   5 3473.02   32.37
  -9   3   5 3208.98   28.70
  -9   3   5 3355.83   26.38
  -9   3   5 3242.90   30.89
  -9   3   5 3264.23   31.33
  -9   3   5 3503.30   33.98
  -9  -3   5 3548.15   30.40
   5   4  -8 4997.80   37.38
   5   4  -8 4942.82   35.65
  -5  -4   8 4911.67   36.97
  -5   4   8 4911.55   37.13
  -5   4   8 4961.62   42.79
  -5   4   8 5030.25   36.64
  -5   4   8 4965.84   39.75
 -10   2   4 8241.22   50.11
 -10  -2   4 8486.92   47.05
 -10   2   4 8223.83   51.47
 -10   2   4 8418.26   49.06
 -10   2   4 8136.25   48.04
 -10   2   4 8261.87   45.42
 -10  -2   4 8422.15   48.13
 -10  -2   4 8351.27   43.46
   2   5  -6 1249.06   17.59
   2   5  -6 1165.99   18.49
  -2   5   6 1138.60   18.46
   2   5  -6 1246.70   18.30
  -2   5   6 1227.53   17.93
  -2   5   6 1096.40   17.16
   2   5  -6 1200.12   19.55
  -9   2  -1 5244.91   40.29
  -9   2  -1 5085.73   38.46
  -9   2  -1 5221.22   34.59
  -9  -2  -1 5237.36   32.86
  -9   2  -1 5255.30   37.39
  -9  -2  -1 5248.71   30.59
  -9  -2  -1 5182.03   36.50
  -9   2  -1 5060.86   38.64
  -9   2   8   55.69    5.18
  -9  -2   8   65.53    6.22
  -9   2   8   56.88    6.79
  -9   2   8   66.44    6.06
  -9   2   8   56.04    6.21
  -9  -2   8   64.76    5.18
  -9  -2   8   64.86    5.03
  -4   3  10 1788.09   24.88
  -4   3  10 1796.55   21.76
  -4   3  10 1752.60   18.59
  -4   3  10 1828.54   20.41
  -4  -3  10 1836.55   22.34
   4   3 -10 1888.38   24.37
  -4   2  11 1335.74   20.61
  -4   2  11 1362.35   18.00
  -4   2  11 1396.98   19.27
  -4  -2  11 1382.25   20.29
   4   2 -11 1372.99   21.05
  -7   0  11    3.34    4.14
  -2   0 -1026642.40   94.27
   2   0  1026660.10   92.30
 -10   2   3 2456.48   23.50
 -10   2   3 2573.86   27.05
 -10  -2   3 2474.39   25.16
 -10   2   3 2615.64   24.75
 -10  -2   3 2523.52   21.97
 -10   2   3 2575.19   26.82
 -10   2   3 2493.61   28.27
 -10  -2   3 2626.24   23.43
   3   2 -11   48.58    6.18
  -3   2  11   36.14    4.70
  -3  -2  11   35.53    5.29
  -3   2  11   45.38    6.16
  -3   2  11   52.49    4.76
   5   2   7   80.09    5.95
  -5   2  -7   77.61    7.05
  -5  -2  -7   83.87    6.40
  -5  -2  -7   83.26    5.31
  -5  -2  -7   83.34    5.28
  -5   2  -7   83.11    7.20
  -5   2  -7   87.05    5.90
  -5   2  -7   84.03    6.07
   0   4   8 4277.49   31.13
   0   4   8 4379.08   33.33
   0   4   8 4291.21   33.10
   0   4   8 4348.11   38.19
   0   4   8 4328.71   33.59
   0   4  -8 4453.92   36.76
   0   4  -8 4370.70   29.76
   0   4  -8 4484.92   37.74
   0   4  -8 4199.15   35.11
 -10   0   0  638.21   11.92
 -10   0   0  641.81   13.47
 -10   0   0  620.98   12.85
   1   5  -6  453.54   12.38
   1   5  -6  426.42   11.21
  -1   5   6  418.62   11.37
  -1   5   6  440.14   11.36
   1   5  -6  426.35   12.03
  -1   5   6  470.74   12.34
   1   5  -6  462.46   11.10
  -1   5   6  474.51   13.46
 -10  -2   5   24.93    5.11
 -10   2   5   26.51    5.30
 -10   2   5   17.93    5.13
 -10  -2   5   42.74    5.46
 -10   2   5   22.94    5.23
 -10   2   5   30.40    5.35
 -10  -2   5   49.85    4.61
 -10   2   5   13.37    4.29
   1   3   9 1621.01   19.32
   1   3   9 1490.86   19.52
   1   3   9 1533.14   23.04
  -1   3  -9 1560.94   18.13
   1   3   9 1562.44   16.91
  -1   3  -9 1672.68   22.23
  -1   3  -9 1612.60   22.18
   0   0 -11   -0.66    4.13
   0   0  11    0.38    4.28
   3   5  -6 5671.65   39.95
   3   5  -6 5397.67   35.29
  -3   5   6 5353.55   38.75
  -3   5   6 5675.53   38.22
  -3   5   6 5325.30   35.88
   3   5  -6 5600.43   38.94
  -3   5   6 5589.88   38.41
  -2   3  10 1359.50   21.99
  -2   3  10 1387.60   17.64
  -2  -3  10 1389.60   18.26
   2   3 -10 1346.05   21.54
   2   3 -10 1369.80   18.70
   2   4   7  273.46    9.68
  -2  -4  -7  202.38    8.44
   2   4   7  218.08    7.95
   2   4   7  303.13   10.34
   2   4   7  221.20    8.24
  -2  -4  -7  267.51    7.67
  -2   4  -7  238.30    8.35
  -2   4  -7  255.07   10.25
  -2   4  -7  286.79   10.13
   2   4   7  247.73    9.01
  -2   4  -7  261.61    8.08
  -2   4  -7  255.86    7.70
  -5   3  -6 4944.51   37.09
   5   3   6 4899.35   36.13
  -5   3  -6 4649.64   36.82
  -5   3  -6 4912.45   36.01
  -5  -3  -6 4685.99   36.67
  -6  -2  -6 5177.29   31.66
   6   2   6 5168.71   36.54
  -6   2  -6 5026.01   40.45
  -6   2  -6 5282.60   33.31
  -6  -2  -6 5344.56   37.72
  -6   2  -6 5243.61   35.57
  -6  -2  -6 5133.91   36.03
  -6   2  -6 4882.57   36.62
  -6  -2  -6 4931.92   33.62
  -6   2  -6 4675.60   38.27
  -8   1  -4  189.74    7.99
  -8   1  -4  161.73    8.06
  -8   1  -4  171.73    7.33
   8   1   4  161.30    6.31
  -8   1  -4  176.33    8.33
  -8  -1  -4  146.88    6.33
  -8  -1  -4  179.04    7.85
  -8  -1  -4  175.44    6.21
  -4  -3  -7 5544.48   32.65
  -4   3  -7 5601.63   37.81
  -4  -3  -7 5749.53   33.65
   4   3   7 5654.38   39.58
  -4   3  -7 5507.86   43.19
  -4   3  -7 5873.33   40.33
  -4   3  -7 5352.18   31.86
  -4   3  -7 5431.41   39.11
  -4  -3  -7 5499.58   40.04
   4   3   7 5774.88   38.80
  -7   4  -1 6470.71   42.93
  -7   4  -1 6556.99   37.79
  -7  -4  -1 6385.97   44.04
  -7   4  -1 6516.34   43.71
  -7   4  -1 6560.28   44.04
  -7   4  -1 6428.34   40.31
  -7   4  -1 6651.58   41.89
  -7  -4  -1 6470.53   37.21
   4   2   8   14.29    4.57
  -4   2  -8   18.14    5.29
  -4   2  -8   12.27    5.54
  -4  -2  -8   13.40    4.01
  -4   2  -8   14.79    4.67
  -4  -2  -8   12.08    3.16
  -4   2  -8   14.03    4.17
 -10   0   811501.70   57.05
 -10   0   810674.00   47.82
 -10   0   810787.60   54.13
 -10   0   811585.10   58.88
 -10   0   811299.40   60.58
  -5   2  11   18.27    4.84
  -5  -2  11   17.74    5.44
  -5   2  11   17.34    4.11
  -5   2  11   15.64    4.93
  -5   2  11   19.64    3.53
  -6   4  -3 3433.26   29.45
  -6   4  -3 3630.62   31.03
  -6   4  -3 3402.61   29.54
  -6   4  -3 3316.19   31.29
  -6  -4  -3 3560.39   31.94
  -6   4  -3 3435.23   31.74
  -6   4  -3 3564.15   27.81
  -2   2  11  487.19   13.55
   2   2 -11  458.71    9.57
  -2  -2  11  470.23   11.53
   2   2 -11  466.02   12.47
  -7   3   9 3518.17   34.93
  -7   3   9 3544.08   29.97
  -7   3   9 3173.34   24.52
  -7  -3   9 3322.04   25.32
   7   3  -9 3605.34   27.10
  -7  -3   9 3534.38   33.78
   7   3  -9 3440.86   29.00
  -7   3   9 3705.54   32.56
  -1   2 -10   86.77    6.22
   1   2  10   53.65    5.53
  -1   2 -10   81.75    5.70
   1  -2  10   58.99    4.55
  -1   2 -10   67.21    5.64
  -1  -2 -10   83.12    6.30
  -5   3  1014230.80   71.59
  -5  -3  1015194.20   68.55
   5   3 -1014711.00   71.40
  -5   3  1014502.60   69.04
  -5   3  1014830.90   62.47
 -10   2   225191.40   90.72
 -10  -2   224062.50   85.78
 -10  -2   224532.20   84.36
 -10   2   224450.00   92.77
 -10  -2   224522.90   81.95
 -10  -2   224826.90   79.80
 -10   2   224807.30   93.88
 -10   2   223772.50   87.59
  -5   5  -1    3.13    5.57
  -5  -5  -1    3.75    4.63
  -5   5  -1    5.07    4.19
  -5   5  -1    7.28    3.32
  -5   5  -1   12.81    4.62
   5   5   1    2.78    5.29
  -5   5  -1    4.24    4.53
  -5   5  -1   -0.14    3.48
   5   5   1   10.18    3.73
  -8  -3   8   70.32    5.34
  -8   3   8   67.37    7.30
  -8   3   8   65.33    5.87
  -8   3   8   70.48    5.62
  -8   3   8   70.41    6.06
  -8  -3   8   70.16    6.66
  -8   3   8   84.50    5.86
  -9   3   110146.00   56.96
  -9   3   110503.20   55.56
  -9   3   111067.20   56.02
  -9  -3   110307.60   49.83
  -9  -3   110941.80   57.33
  -9   3   110770.70   55.72
  -9   3   110176.10   51.81
  -6   3  -518429.50   81.89
  -6   3  -519158.20   70.84
  -6   3  -519506.80   77.92
   6   3   519285.80   75.84
  -6   3  -518784.20   76.94
  -6  -3  -518942.80   77.59
  -6   3  -518157.00   76.54
  -9  -3   6 5967.58   42.94
  -9   3   6 6341.45   42.76
  -9   3   6 6305.68   43.28
  -9   3   6 6216.93   40.67
  -9   3   6 6121.78   35.93
  -9   3   6 5947.85   45.70
  -9  -3   6 6214.68   40.14
  -7   1  11  420.27   10.24
  -7  -1  11  424.86   11.85
  -7   1  11  433.85    9.67
   2  -1  10  479.66   10.76
  -2  -1 -10  456.45   11.66
  -2   1 -10  474.14   10.92
   2   1  10  476.34   11.60
  -2   1 -10  478.60   10.15
  -2   1 -10  476.92   11.73
  -5   5   5 1244.50   20.53
  -5   5   5 1324.95   17.60
  -5   5   5 1410.26   17.97
  -5   5   5 1231.57   20.79
  -5   5   5 1459.09   19.14
   5   5  -5 1427.09   17.71
  -5  -5   5 1491.82   19.44
   5   5  -5 1381.38   20.40
  -8  -4   3 2199.09   25.91
  -8   4   3 2044.61   20.30
  -8   4   3 2069.18   21.02
  -8   4   3 2111.31   23.07
  -8   4   3 2166.63   26.76
  -8   4   3 2108.24   25.33
 -10   1   0   26.14    5.51
 -10  -1   0   24.85    4.81
 -10  -1   0   28.97    3.74
 -10  -1   0   16.43    4.40
 -10   1   0   21.48    5.10
 -10   1   0   19.69    4.09
 -10   1   0   24.06    4.35
 -10  -1   0   24.98    3.59
 -10   1   0   20.02    3.97
 -10   2   620789.00   82.10
 -10   2   620196.60   79.04
 -10   2   620024.90   75.96
 -10   2   619532.70   84.54
 -10  -2   620261.30   73.06
 -10  -2   620217.20   77.11
 -10   2   620175.10   83.13
 -10  -2   620308.20   79.94
   0   5  -6   23.62    4.26
   0   5  -6   19.37    5.20
   0   5  -6   34.22    5.00
   0   5  -6   22.81    5.77
   0   5  -6   30.86    4.85
   0   5   6   29.87    5.20
   0   5   6   21.26    5.30
   0   5   6   26.03    5.44
   0   5   6   23.97    5.29
  -3   5  -4 3733.98   32.34
   3   5   4 3817.99   27.57
   3   5   4 3745.69   28.69
  -3   5  -4 3802.72   30.30
   3   5   4 4005.50   35.81
  -3   5  -4 3742.50   27.12
  -3   5  -4 3845.04   31.54
  -3   5  -4 3566.83   34.68
  -3  -5  -4 3754.57   30.28
  -3   5  -4 3726.45   31.17
   0   1 -11 3139.17   27.40
   0  -1 -11 3116.26   29.19
   0   1  11 3190.41   28.89
  -8   4   4 2282.51   22.91
  -8   4   4 2270.81   21.78
  -8   4   4 2244.76   23.89
  -8   4   4 2255.95   27.71
  -8  -4   4 2181.88   25.64
  -4   5   6    3.96    5.52
  -4   5   6    4.07    4.81
  -4   5   6    8.42    3.84
  -4   5   6    9.71    4.80
  -4   5   6    8.92    4.93
   4   5  -6    7.00    5.05
   4   5  -6    4.14    4.11
  -4  -5   6    4.62    3.45
  -6   0  -7    0.18    4.88
   6   0   7    0.83    2.87
  -6   0  -7    0.59    3.43
  -6   0  -7    7.91    4.54
  -6   0  -7    1.32    3.65
  -8   4   2 5112.92   33.33
  -8  -4   2 5205.96   36.78
  -8   4   2 5062.94   40.34
  -8   4   2 5259.94   40.74
   8   4  -2 5257.13   35.31
  -8   4   2 5189.43   36.40
  -8  -4   2 5088.62   38.53
  -8   4   2 5219.87   39.71
  -8   4   2 5011.03   30.19
  -5   0  -8 8993.71   41.48
   5   0   8 8986.62   43.60
  -5   0  -8 9106.84   53.25
  -1   3  10 3235.35   33.29
  -1   3  10 3229.22   24.39
  -1   3  10 3085.96   26.95
  -1  -3  10 3102.79   25.72
   1   3 -10 3124.83   28.45
   1   3 -10 3265.03   30.97
  -3   3  -8 2934.79   28.34
  -3   3  -8 3029.34   26.80
  -3   3  -8 3226.51   31.98
   3   3   8 3016.05   28.25
  -3  -3  -8 3085.04   25.76
   3   3   8 3124.12   30.09
  -8   3  -2  274.55    7.95
  -8   3  -2  320.59   10.15
  -8   3  -2  314.12   10.10
  -8   3  -2  282.68    9.48
  -8   3  -2  277.14    9.46
  -8  -3  -2  273.18    9.43
  -8   3  -2  293.45    9.76
  -7   2  -5 2202.63   25.81
  -7   2  -5 2230.17   24.31
  -7   2  -5 2235.92   22.75
  -7  -2  -5 2215.17   23.64
  -7   2  -5 2241.30   22.41
   7   2   5 2232.30   23.00
  -7   2  -5 2242.51   26.33
  -7  -2  -5 2225.76   21.92
  -2   5  -5  850.73   14.61
   2   5   5  960.51   17.56
   2   5   5  866.92   14.33
  -2   5  -5  901.15   15.83
  -2   5  -5  941.81   15.85
   2   5   5  861.06   13.43
  -2  -5  -5  792.81   13.47
  -2   5  -5  886.64   15.31
  -2   5  -5  916.00   17.39
   4   5   3 1342.72   15.06
   4   5   3 1386.96   22.20
  -4   5  -3 1380.06   19.80
  -4   5  -3 1336.52   16.78
  -4   5  -3 1492.67   20.64
  -4   5  -3 1404.60   17.64
  -4   5  -3 1386.03   19.35
  -4   5  -3 1444.73   18.88
  -4  -5  -3 1375.93   18.66
 -10  -1   8  585.02   12.04
 -10  -1   8  562.38   12.93
 -10   1   8  576.86   13.83
 -10   1   8  607.14   13.94
 -10   1   8  607.14   13.24
 -10   1   8  596.27   12.36
 -10  -1   8  555.82   11.80
  -4   0  12  296.30    9.89
   4   0 -12  266.31    8.83
  -4   0  12  272.99    9.39
  -6   5   2  951.25   12.91
  -6   5   2 1026.04   15.11
  -6  -5   2 1029.64   16.87
   6   5  -2 1013.11   17.51
  -6   5   2  967.29   19.03
   6   5  -2  995.13   15.60
  -6   5   2  944.47   16.81
  -6   5   2 1035.43   13.90
  -6   5   2  973.33   15.73
  -7   4   7 6996.12   42.93
  -7   4   7 6713.86   41.31
  -7   4   7 6882.28   37.96
  -7   4   7 6716.52   49.28
  -7   4   7 6741.65   45.41
   7   4  -7 7341.16   46.84
  -7  -4   7 7134.95   45.42
  -6   4   8  555.82   14.42
  -6   4   8  521.58   12.35
  -6   4   8  520.65   11.77
  -6  -4   8  508.74   12.54
   6   4  -8  525.29   11.21
   6   4  -8  533.73   11.94
  -6   4   8  504.74   13.69
   6   4  -8  493.94   11.98
  -6   5   3   52.93    4.68
  -6   5   3   62.39    6.36
  -6  -5   3   42.93    5.26
  -6   5   3   68.45    7.48
  -6   5   3   49.10    4.74
   6   5  -3   64.06    6.30
   6   5  -3   63.85    4.75
  -6   5   3   60.09    5.75
   3   2   9 2026.97   22.71
  -3   2  -9 2002.91   24.15
  -3   2  -9 1925.51   21.50
  -3  -2  -9 1910.26   21.52
  -3   2  -9 1901.03   21.83
   3   0 -1213378.40   59.86
   3   0 -1213492.00   60.06
   0   6   0   52.96    6.09
   0   6   0   49.54    4.58
   0   6   0   45.15    4.52
   0   6   0   42.38    4.43
  -6  -2  11  504.48   12.75
  -6   2  11  507.75   10.51
  -6   2  11  533.06   13.28
  -6   2  11  521.69   12.34
  -3   4   9 1274.23   21.69
  -3   4   9 1449.76   20.71
   3   4  -9 1426.07   19.40
   3   4  -9 1342.08   16.17
   3   4  -9 1339.94   19.97
   3   4  -9 1534.56   21.28
  -3  -4   9 1469.91   18.52
  -3   4   9 1441.29   19.05
  -8   4   5 1377.28   18.75
  -8  -4   5 1338.40   20.11
  -8   4   5 1297.61   17.28
  -8   4   5 1343.52   16.68
  -8   4   5 1318.38   21.44
  -8   4   5 1341.60   20.01
  -9   0  -3    1.46    4.34
  -9   0  -3    1.18    4.38
  -9   0  -3   -1.25    3.99
  -9   0  -3    4.03    3.42
  -5   0  12 2555.12   26.69
  -5   0  12 2645.94   24.67
  -7   0  -6 6561.70   44.01
  -7   0  -6 6575.25   40.16
  -7   0  -6 6687.98   39.41
 -11   0   4 8374.45   50.92
 -11   0   4 8340.12   43.88
 -11   0   4 8369.77   47.49
  -1  -2  11  552.19   12.08
   1   2 -11  536.04   10.72
   1   2 -11  526.56   12.43
  -1   2  11  552.38   12.31
  -9   0  10  911.80   14.36
  -9   0  10  885.82   14.21
  -9   0  10  872.97   12.86
  -1   4  -8   48.57    6.47
  -1   4  -8   61.74    4.44
   1   4   8   60.92    5.99
   1   4   8   61.40    5.03
   1   4   8   61.27    5.73
   1   4   8   56.82    5.29
   1   4   8   58.29    6.16
  -1   4  -8   60.39    6.17
 -10  -2   1 1265.86   17.65
 -10   2   1 1277.73   17.73
 -10  -2   1 1161.71   16.27
 -10   2   1 1159.75   18.57
 -10   2   1 1247.79   19.34
 -10   2   1 1187.70   17.58
 -10   2   1 1194.33   15.18
 -10  -2   1 1199.60   16.01
  -6   5   1   61.69    6.51
   6   5  -1   69.24    6.24
  -6   5   1   84.41    7.20
   6   5  -1   75.76    5.95
  -6  -5   1   92.27    6.34
  -6   5   1   80.49    6.03
  -6   5   1   86.57    4.70
   0   6   1 5609.16   33.40
   0   6  -1 5768.76   37.29
   0   6   1 5849.92   36.21
   0   6  -1 5609.49   32.06
   0   6   1 5835.31   40.87
   0   6  -1 5950.52   39.78
   0   6   1 5925.49   38.53
   0   6  -1 5552.19   37.58
   0   6   1 5699.35   37.46
  -1   6   0 1663.55   21.18
   1   6   0 1598.49   19.43
  -1   6   0 1632.41   18.86
   1   6   0 1649.22   18.91
   1   6   0 1597.42   21.24
  -1   6   0 1708.98   20.01
   1   6   0 1703.58   20.43
  -1   6   0 1640.07   17.48
 -11   0   5    0.05    4.40
 -11   0   5    0.63    3.05
 -11   0   5    1.14    4.13
  -4   0  -9    1.25    3.79
   4   0   9    3.03    3.44
  -4   0  -9    1.62    4.54
  -2   4   9   63.06    4.28
  -2   4   9   69.41    7.20
  -2  -4   9   57.88    4.59
   2   4  -9   62.01    5.86
   2   4  -9   67.26    4.40
   2   4  -9   70.25    6.76
   2   4  -9   66.36    6.65
  -2   4   9   82.47    5.81
  -8   4   1 1935.44   20.45
  -8   4   1 1975.20   23.57
  -8  -4   1 1883.31   23.81
  -8   4   1 1900.95   23.93
  -8  -4   1 1943.89   21.18
  -8   4   1 1813.50   22.95
   8   4  -1 1871.62   22.10
   1   6  -1  430.61   10.57
  -1   6   1  445.61   10.92
  -1   6   1  437.80   11.72
  -1   6   1  431.45   10.10
  -1   6   1  403.55   10.83
  -1   6   1  429.65    9.70
   1   6  -1  439.78   11.03
   1   6  -1  440.36    9.84
  -6   1  -7   26.22    6.09
  -6   1  -7   38.03    3.94
  -6  -1  -7   28.85    5.32
  -6   1  -7   25.72    4.99
  -6  -1  -7   21.03    4.35
  -6   1  -7   16.78    5.00
  -6  -1  -7   26.99    4.29
   6   1   7   24.34    4.23
  -7  -3  -4 8396.55   48.61
  -7   3  -4 8196.17   47.82
  -7   3  -4 8410.24   46.08
  -7   3  -4 8217.56   49.05
  -7   3  -4 8227.91   47.52
  -7   3  -4 8458.27   51.70
  -6   3  10  294.44    8.95
  -6   3  10  310.24    9.75
  -6   3  10  271.40    9.90
   6   3 -10  260.25    7.15
   6   3 -10  313.83    9.67
  -6  -3  10  286.51   10.13
   6   3 -10  310.19   10.56
  -6   3  10  295.18   10.48
  -5   1  -813686.00   62.57
  -5   1  -813488.10   67.16
  -5  -1  -813451.90   60.02
   5   1   813635.50   59.07
  -5   1  -813447.50   65.19
   4   4  -9 4823.92   36.27
  -4   4   9 4562.35   34.98
  -4   4   9 4770.23   40.39
  -4  -4   9 4571.37   34.19
   4   4  -9 4721.23   32.40
  -4   4   9 4651.19   34.29
  -4   4   9 4571.78   34.35
   4   4  -9 4754.93   37.39
  -6   5   4    2.35    3.62
  -6   5   4    5.49    3.49
   6   5  -4   10.14    4.84
  -6   5   4   -1.71    5.08
  -6   5   4    0.07    5.94
  -6   5   4    1.32    4.14
  -8   2  10  120.08    8.10
  -8   2  10  114.68    6.56
  -8  -2  10  107.47    4.87
  -8  -2  10  111.28    6.68
  -8   2  10  115.00    7.23
  -8  -2  10  121.19    7.59
 -11   0   3    3.38    3.88
 -11   0   3    1.23    3.88
 -11   0   3    2.75    2.85
 -11   0   3    0.46    4.46
 -10   0  -1    0.32    2.77
 -10   0  -1   -1.96    4.74
 -10   0  -1    2.23    4.18
 -10   0  -1   -0.03    2.85
 -10   0  -1    6.31    4.27
 -10  -2   7 1720.17   20.51
 -10   2   7 1606.46   22.30
 -10  -2   7 1721.09   19.27
 -10  -2   7 1595.85   20.84
 -10   2   7 1578.06   21.78
 -10   2   7 1691.81   21.13
 -10   2   7 1667.63   21.08
  -9  -3   0   70.15    6.16
  -9  -3   0   73.77    4.67
  -9   3   0   77.60    6.24
  -9   3   0   77.41    5.03
  -9   3   0   77.59    5.77
  -9   3   0   74.59    6.28
  -9   3   0   90.24    6.93
  -9   3   711095.00   55.84
  -9   3   710720.10   54.93
  -9  -3   710691.10   56.82
  -9   3   711261.70   62.40
  -9   3   710945.20   48.31
  -9  -3   711001.30   53.18
  -9   3   710902.00   56.35
  -4   1  12 1293.66   18.32
   4   1 -12 1360.53   15.58
  -4  -1  12 1294.01   19.03
  -4   1  12 1346.32   19.77
   4   1 -12 1379.95   19.59
  -9  -2  -2   30.46    4.57
  -9   2  -2   39.77    4.88
  -9   2  -2   29.82    5.57
  -9   2  -2   31.77    4.78
  -9  -2  -2   37.21    4.24
  -9   2  -2   42.39    5.74
  -8   0  11    4.71    3.90
  -9  -2   9    6.27    3.84
  -9   2   9    7.45    4.64
  -9   2   9    4.30    5.11
  -9  -2   9    6.05    3.37
  -9   2   9   13.86    3.91
  -9  -2   9    7.89    4.63
  -9   2   9    4.07    4.44
   1   6   1  735.74   11.85
   1   6   1  810.22   14.66
   1   6   1  767.73   15.07
  -1   6  -1  741.06   13.89
  -1   6  -1  776.87   14.36
  -1   6  -1  775.13   13.74
   1   6   1  727.88   13.77
   1   5   6 2249.39   22.61
   1   5   6 2096.13   24.65
   1   5   6 2301.99   25.75
   1   5   6 2036.47   19.53
  -1   5  -6 2473.70   27.91
  -1   5  -6 2296.08   25.01
  -1   5  -6 2234.90   24.27
  -1   5  -6 2356.76   23.10
   1   5   6 2498.06   26.75
  -5  -5  -2  858.62   15.32
  -5   5  -2  921.22   15.39
  -5   5  -2  879.01   12.51
  -5   5  -2  929.85   15.94
  -5   5  -2  907.22   15.11
  -5   5  -2  931.81   16.18
  -5   5  -2  863.60   14.87
  -2   0  12 3967.10   33.30
   2   0 -12 4025.68   29.09
   2   0 -12 4055.04   31.91
  -4   4  -6  267.47   10.51
   4   4   6  212.15    8.38
  -4   4  -6  269.98    8.27
  -4  -4  -6  208.83    8.44
  -4   4  -6  257.93    8.69
  -4   4  -6  239.57    7.32
  -4   4  -6  302.02   10.00
  -7   4  -2  299.19    9.67
  -7   4  -2  276.18    9.45
  -7   4  -2  282.63    8.21
  -7   4  -2  279.77    9.18
  -7  -4  -2  308.59   10.13
  -3   1  12 2545.21   26.41
  -3   1  12 2620.03   28.55
   3   1 -12 2558.65   22.56
   3   1 -12 2569.40   25.82
   1   6  -210214.80   51.90
   1   6  -210324.30   51.41
  -1   6   210181.40   52.45
   1   6  -2 9802.23   50.76
  -1   6   210141.80   51.00
  -1   6   210196.20   44.00
  -1   6   210425.70   52.14
  -1   6   2 9572.36   53.96
 -11   0   6  772.34   14.28
 -11   0   6  766.87   15.50
  -1   0 -11    1.20    3.97
   1   0  11    1.87    4.14
  -5   4  -5 8650.46   45.39
  -5   4  -5 8692.33   51.23
   5   4   5 8701.29   47.81
  -5   4  -5 8678.94   48.00
  -5   4  -5 8650.51   53.30
   0   6   2 1973.16   23.32
   0   6  -2 1848.35   21.28
   0   6   2 1704.20   20.56
   0   6   2 1865.79   17.30
   0   6   2 1826.16   21.34
   0   6  -2 1814.00   21.35
   0   6  -2 1722.01   20.73
   0   6   2 1932.74   20.78
  -5   5   6  231.87    9.43
   5   5  -6  235.65    9.22
  -5  -5   6  231.23    8.29
  -5   5   6  252.60    8.84
  -5   5   6  256.19   10.18
  -5   5   6  236.61    7.68
  -5   5   6  229.52    8.53
   5   5  -6  258.03    8.47
  -9  -1  -3  441.28    9.27
  -9  -1  -3  437.49   10.94
  -9   1  -3  458.18   11.89
  -9   1  -3  447.67   11.91
  -9  -1  -3  429.99   10.87
  -9  -1  -3  434.15   11.42
  -9   1  -3  433.15   11.14
   9   1   3  454.24    9.13
  -9   1  -3  453.63   10.82
  -5   1  12 2114.10   22.64
  -5   1  12 2063.99   23.07
  -5  -1  12 2125.64   24.53
  -2   5   7    1.47    4.12
  -2   5   7    5.08    5.14
   2   5  -7   17.05    4.00
  -2   5   7    1.53    3.83
   2   5  -7    4.59    3.91
  -2   5   7    6.13    6.32
   2   5  -7    0.70    4.89
   2   5  -7    3.34    5.06
  -7   1  -6  299.09    8.51
  -7   1  -6  287.46   10.08
   7   1   6  243.26    7.56
  -7  -1  -6  245.46    8.94
  -7  -1  -6  271.92    7.98
  -7   1  -6  263.18    9.00
  -7  -1  -6  252.61    9.02
  -7   1  -6  296.55    9.89
   2   6  -1 3747.76   31.04
  -2   6   1 3732.99   27.11
   2   6  -1 3740.54   29.41
  -2   6   1 3841.62   31.31
  -2   6   1 3764.95   30.16
   2   6  -1 3794.55   29.51
  -2   6   1 3811.74   27.99
  -2   6   1 3857.60   32.56
 -11   1   413260.10   65.60
 -11  -1   412960.50   59.16
 -11  -1   412939.80   51.84
 -11   1   412915.40   58.85
 -11  -1   413247.80   60.49
 -11   1   413405.70   61.77
  -9   1  10 4857.72   30.15
  -9   1  10 5310.50   35.52
  -9  -1  10 5546.65   41.50
  -9   1  10 5294.73   42.84
  -9  -1  10 4832.60   30.24
  -9   1  10 5388.74   42.02
  -9  -1  10 5077.90   37.96
  -2  -3  -9  109.41    6.20
  -2   3  -9  102.67    5.80
  -2   3  -9  106.73    6.82
  -2   3  -9   90.81    5.80
   2   3   9  107.91    7.16
  -2   3  -9  113.86    7.04
   2   3   9   92.92    6.33
   2   3   9  107.70    6.16
  -6   0  12  621.86   13.14
   6   5   0   89.63    5.71
  -6  -5   0   65.54    6.04
  -6   5   0  101.79    7.54
  -6   5   0   75.88    4.26
   6   5   0  105.87    6.93
  -6   5   0   97.18    6.49
  -6   5   0   66.80    6.15
   1   4  -9  427.23   11.60
  -1   4   9  416.51   10.26
   1   4  -9  409.56   11.52
  -1   4   9  404.66    9.03
   1   4  -9  409.14    8.64
  -1   4   9  414.73   11.30
   1   4  -9  398.44   11.63
 -11  -1   5 1049.35   16.31
 -11   1   5 1026.42   16.77
 -11  -1   5 1078.91   14.49
 -11   1   5 1048.28   18.03
 -10   0   9   -0.84    3.05
 -10   0   9    1.07    4.80
 -10   0   9    3.28    4.29
 -10   0   9    0.22    3.34
  -3   5   7 3686.27   27.85
  -3   5   7 3859.30   31.38
   3   5  -7 3778.73   29.84
  -3   5   7 3674.17   31.64
   3   5  -7 3718.85   30.57
   3   5  -7 3794.56   32.55
  -3   5   7 3634.96   27.52
   4  -1   9  262.75    7.14
  -4   1  -9  267.99    9.15
  -4   1  -9  272.46    9.19
  -4  -1  -9  283.92    8.91
   4   1   9  257.66    8.55
  -4  -1  -9  261.39    7.69
   0   3 -10 1004.83   17.38
   0   3 -10 1044.31   13.55
   0   3 -10 1015.50   16.61
   0   3  10 1027.50   18.75
  -2   6   0 1675.12   19.57
  -2   6   0 1663.53   20.81
   2   6   0 1632.46   20.33
   2   6   0 1740.98   22.15
   2   6   0 1649.29   18.62
   2   6   0 1594.60   18.86
  -2   6   0 1738.11   21.20
  -2   6   0 1524.02   19.33
  -8  -2  -4 7614.21   39.35
  -8   2  -4 7340.64   46.29
  -8   2  -4 7624.47   41.84
   8   2   4 7437.03   41.31
  -8  -2  -4 7313.60   42.19
  -8   2  -4 7325.71   44.14
  -8   2  -4 7604.34   45.82
  -8   2  -4 7267.73   47.05
  -8   4   6   36.52    6.86
  -8   4   6   44.95    4.12
  -8  -4   6   45.42    5.60
  -8   4   6   47.07    5.30
  -8   4   6   46.78    5.04
  -8  -4   6   50.11    5.90
  -8   4   6   47.61    5.11
   3   4   7 7366.42   42.69
  -3   4  -7 6699.80   37.24
  -3   4  -7 6930.47   44.27
   3   4   7 6885.45   41.02
   3   4   7 6763.78   40.69
   3   4   7 6885.12   45.07
  -3  -4  -7 7054.95   42.90
  -3   4  -7 6674.38   39.03
  -3   4  -7 6405.74   38.52
  -3   4  -7 6797.96   46.44
   5   4  -9  129.12    7.28
  -5   4   9  109.25    6.61
  -5  -4   9  109.15    5.09
  -5   4   9  121.67    7.52
  -5   4   9  124.10    8.06
  -5  -4   9  112.88    6.83
   5   4  -9  117.66    6.03
  -5   4   9  112.36    7.08
   5   4  -9  122.85    6.77
   2   6  -2  322.19    8.08
   2   6  -2  314.14    9.69
  -2   6   2  361.91    9.54
   2   6  -2  342.14    9.92
  -2   6   2  330.27   10.37
   2   6  -2  374.11    9.91
  -2   6   2  337.36    8.06
  -2   6   2  343.89   10.34
  -2   6   2  372.70   10.11
 -11   1   3  132.42    7.04
 -11  -1   3  113.94    5.14
 -11  -1   3  116.08    6.43
 -11   1   3  110.96    6.74
 -11  -1   3  116.38    6.68
 -11  -1   3  125.75    5.90
 -11   1   3  116.74    7.13
 -11   0   2  417.40   10.50
 -11   0   2  454.88   12.06
 -11   0   2  434.69    9.66
 -11   0   2  438.44   10.42
 -10  -1  -1  572.64    9.87
 -10  -1  -1  607.99   12.45
 -10   1  -1  574.18   11.52
 -10   1  -1  586.28   12.98
 -10  -1  -1  567.38   12.34
 -10   1  -1  574.17   13.72
 -10   1  -1  576.54   12.32
  -1   5   7 1335.45   19.00
   1   5  -7 1271.21   17.00
   1   5  -7 1394.36   19.95
  -1   5   7 1367.28   21.25
   1   5  -7 1299.11   18.59
  -1   5   7 1249.64   17.23
   1   5  -7 1355.15   20.09
  -1   5   7 1326.42   18.46
  -8   0  -5    0.46    4.09
  -8   0  -5    2.49    3.49
  -8   0  -5   -0.06    4.88
  -8   0  -5   -0.33    3.69
  -6   5   5  861.19   13.26
  -6   5   5  883.47   17.57
  -6   5   5  912.98   13.93
   6   5  -5  975.74   16.87
  -6  -5   5  945.84   15.74
  -6   5   5  917.07   16.79
  -6   5   5  886.96   14.54
   6   5  -5  944.79   12.25
  -8   1  11 1123.21   14.73
  -8   1  11 1168.81   15.43
  -8  -1  11 1130.63   17.34
  -8   4   0  273.01    9.00
  -8  -4   0  274.30    9.86
   8   4   0  260.63    9.53
  -8   4   0  278.55    9.49
  -8   4   0  271.93    9.41
  -8  -4   0  268.40    7.78
  -8   4   0  259.18    7.92
   1   6   2 8965.61   50.98
  -1   6  -2 9176.62   47.68
   1   6   2 8886.77   51.84
  -1   6  -2 8914.69   47.95
   1   6   2 9105.15   46.70
   2   1 -12    8.60    3.75
  -2  -1  12   11.44    4.33
  -2   1  12   11.75    4.78
   2   1 -12   13.90    4.61
   2  -1 -12   12.37    4.80
  -8   3   9    0.07    4.84
  -8   3   9    1.23    3.65
  -8   3   9    1.60    4.15
  -8  -3   9    0.04    3.27
   8   3  -9   12.75    4.36
  -8   3   9   -0.12    3.14
  -8  -3   9    0.89    4.80
  -8   3   9    2.37    4.35
   3   0  10 2154.70   21.70
  -3   0 -10 2158.76   23.56
 -11   1   6 1618.66   17.51
 -11  -1   6 1822.52   18.74
 -11   1   6 1643.64   19.34
 -11   1   6 1757.90   20.97
 -11   1   6 1749.18   21.55
 -11  -1   6 1640.89   20.44
 -11   1   6 1684.83   22.29
 -11  -1   6 1659.66   20.76
   1   1  11   82.32    6.18
  -1  -1 -11   88.44    6.33
  -1   1 -11   91.83    5.28
  -1   1 -11   92.36    6.08
   1  -1  11   92.27    5.69
   2   6   1  104.45    7.23
  -2   6  -1  114.16    6.66
   2   6   1   97.18    4.97
   2   6   1  114.19    6.10
  -2   6  -1  110.70    7.19
  -2   6  -1  110.78    6.30
  -6   4  -4 3325.17   31.23
  -6  -4  -4 3186.77   29.47
  -6   4  -4 3430.50   30.66
  -6   4  -4 3528.44   27.32
  -6   4  -4 3342.15   29.48
  -6   4  -4 3271.15   25.62
  -6   4  -4 3269.28   28.21
  -7   2  11  658.03   12.68
  -7   2  11  658.25   10.53
  -7  -2  11  704.06   14.50
  -7   2  11  709.86   12.33
  -7   2  11  728.58   15.28
  -2   2 -10 1947.62   22.43
   2   2  10 1901.57   21.35
  -2  -2 -10 1973.66   21.97
  -2   2 -10 1896.85   21.13
  -2   2 -10 1916.15   21.00
 -10   2   0  516.96   12.58
 -10   2   0  554.34   11.31
 -10  -2   0  564.67   11.60
 -10   2   0  607.08   13.39
 -10   2   0  505.54   10.55
 -10  -2   0  536.80   11.51
 -10   2   0  553.16   12.00
 -10  -2   0  571.45   10.23
  -4   5   7 2800.67   25.89
   4   5  -7 2570.58   25.89
  -4   5   7 2544.17   21.70
  -4  -5   7 2508.40   22.53
  -4   5   7 2687.05   29.89
  -4   5   7 2629.82   26.38
   4   5  -7 2506.95   22.77
  -4   5   7 2626.34   25.65
   4   5  -7 2805.69   26.51
  -1   6   3 1488.15   19.29
  -1   6   3 1433.77   19.11
   1   6  -3 1472.50   19.66
   1   6  -3 1471.35   19.14
  -1   6   3 1525.43   20.26
   1   6  -3 1495.57   18.12
  -6  -1  12  435.27   11.79
  -6   1  12  426.43   10.27
  -6   1  12  408.06    9.83
 -11   0   7   -2.87    4.66
 -11   0   7    1.13    3.31
 -11   0   7   -0.65    4.05
   0   2  11  544.42   14.73
   0   2 -11  547.63   10.50
   0   2 -11  575.25   11.18
   0  -2 -11  566.56   12.76
   0   2 -11  581.17   12.53
   0  -2  11  580.47   11.37
 -10   1   9  955.26   17.10
 -10  -1   9  912.69   13.83
 -10  -1   9  862.93   14.37
 -10   1   9  942.18   15.80
 -10   1   9  880.91   13.99
 -10  -1   9  908.60   15.75
 -10   1   9  813.83   16.28
   3   5   5 5006.92   33.26
   3   5   5 5165.70   31.10
  -3   5  -5 5110.57   30.14
  -3   5  -5 5252.65   39.84
  -3   5  -5 5035.27   37.58
  -3   5  -5 5130.59   34.31
  -3  -5  -5 5191.26   34.52
  -3   5  -5 5290.32   34.45
   3   5   5 5053.33   39.70
  -4   5  -4 4045.44   28.01
  -4   5  -4 4011.26   33.60
  -4   5  -4 4002.76   33.98
  -4   5  -4 3890.31   30.43
  -4   5  -4 3918.82   28.24
  -4  -5  -4 4059.10   30.86
   4   5   4 3932.74   29.65
   4   5   4 4075.80   36.18
   1   0 -12  389.21   10.22
  -1   0  12  356.51   10.37
   0   6   3   42.53    5.61
   0   6  -3   26.87    4.83
   0   6  -3   37.30    5.44
   0   6  -3   40.85    5.20
   0   6   3   23.44    5.73
   0   6   3   31.83    4.46
   0   6   3   41.47    5.47
  -7  -4   8 5872.61   37.38
   7   4  -8 6062.84   36.38
  -7  -4   8 6478.03   42.41
   7   4  -8 5875.97   39.18
  -7   4   8 6148.54   35.30
  -7   4   8 6134.29   44.77
  -7   4   8 5880.24   41.18
  -7   4   8 6230.84   39.32
   2   6  -3  454.62   10.32
   2   6  -3  430.58   10.93
  -2   6   3  428.31   10.44
  -2   6   3  441.38   11.45
   2   6  -3  455.31   11.03
  -2   6   3  429.85   11.29
 -11   1   2  563.06   11.75
 -11  -1   2  565.29   11.36
 -11  -1   2  546.52   11.15
 -11  -1   2  531.41   11.67
 -11   1   2  521.55   11.89
 -11   1   2  493.85   12.63
  -3   6   1 1029.00   15.39
   3   6  -1 1044.81   15.63
  -3   6   1 1008.69   14.18
   3   6  -1 1015.41   14.50
  -3   6   1  986.65   12.74
   3   6  -1 1031.21   16.14
  -8   3  -3  121.99    6.63
  -8   3  -3  120.73    7.12
  -8  -3  -3  134.77    6.98
  -8   3  -3  136.05    7.05
  -8   3  -3  119.75    6.80
  -7  -3  10   75.93    6.88
  -7   3  10   83.36    6.74
   7   3 -10   76.70    5.08
  -7   3  10   76.89    6.19
   7   3 -10   79.68    4.73
  -7   3  10   84.07    5.72
  -7  -3  10   70.50    3.81
   7   3 -10   91.12    6.72
 -10   2   8 1209.14   18.58
 -10   2   8 1237.41   17.39
 -10  -2   8 1284.49   16.43
 -10  -2   8 1293.42   16.96
 -10  -2   8 1235.30   17.76
 -10   2   8 1262.88   19.43
 -10   2   8 1283.09   18.04
  -8  -1  -5  710.32   14.14
  -8  -1  -5  680.46   10.99
  -8  -1  -5  692.50   12.92
   8   1   5  686.68   11.13
  -8   1  -5  692.87   14.66
  -8   1  -5  687.43   12.55
  -8  -1  -5  714.16   13.69
  -8   1  -5  702.43   14.26
  -3   6   2 7772.16   38.56
  -3   6   2 8069.53   41.01
   3   6  -2 8197.83   44.29
  -3   6   2 8173.80   45.78
   3   6  -2 8569.45   47.30
  -3   6   2 7452.95   47.60
  -3   6   2 7948.51   44.13
   3   6  -2 7959.68   42.43
   0   5   7  166.45    7.34
   0   5  -7  184.82    7.02
   0   5  -7  190.89    8.27
   0   5  -7  179.95    7.92
   0   5   7  191.07    8.10
   0   5  -7  211.45    9.28
   0   5   7  177.93    8.48
   0   5   7  182.29    5.57
   0   5   7  200.01    8.54
  -6   5  -1 1845.67   18.81
   6   5   1 1804.33   18.06
  -6   5  -1 1753.82   21.47
  -6   5  -1 2083.18   22.23
   6   5   1 1910.38   23.91
  -6   5  -1 1977.71   21.95
  -6  -5  -1 2125.93   23.09
 -10   3   4    9.29    4.51
 -10   3   4    9.24    3.64
 -10   3   4    7.68    4.39
 -10   3   4    5.26    4.31
 -10  -3   4   16.45    4.53
 -10   3   4    6.76    4.88
 -10  -3   4    6.11    4.32
  -9  -3  -1  127.99    6.93
  -9  -3  -1  115.40    4.73
  -9   3  -1  109.28    6.71
  -9   3  -1  119.01    6.85
  -9   3  -1  105.40    6.91
  -9   3  -1  133.84    6.30
  -9   3  -1  107.28    5.63
   0   4   9 4933.42   31.20
   0   4   9 5301.47   40.65
   0   4   9 4962.85   31.81
   0   4  -9 5470.41   39.48
   0   4  -9 5199.20   38.56
   0   4  -9 5088.63   36.85
   0   4   9 5222.18   33.24
   0   4  -9 4992.22   27.83
  -9   3   8   81.73    6.41
  -9   3   8   76.67    4.58
  -9   3   8   76.02    7.26
  -9  -3   8   81.57    6.58
  -9   3   8   86.59    5.77
  -9  -3   8   78.59    5.45
  -9   3   8   82.77    5.53
  -3  -1 -10  583.89   12.34
   3   1  10  589.85   11.95
  -3   1 -10  587.93   12.45
  -3   1 -10  583.25   11.83
   3  -1  10  587.49   10.33
  -2   4  -8 1991.67   23.38
  -2   4  -8 2027.54   24.75
   2   4   8 2103.40   23.77
   2   4   8 2026.45   20.63
  -2  -4  -8 2165.49   19.60
   2   4   8 2088.45   23.20
  -2   4  -8 2014.75   21.26
  -2   4  -8 2052.70   18.52
   2   4   8 2026.33   21.26
  -2   4  -8 2035.44   19.12
  -3   6   0  172.28    6.82
   3   6   0  178.09    6.58
  -3   6   0  165.21    6.75
  -3   6   0  181.78    7.73
  -3   6   0  183.07    8.27
   3   6   0  190.47    8.30
   3   6   0  163.01    6.45
  -4   3  11    3.82    3.40
  -4   3  11    1.05    2.92
  -4   3  11    1.60    3.10
   4   3 -11    0.06    5.14
  -4  -3  11    0.50    3.90
  -4   3  11   -0.31    4.72
  -7   0  12  325.79    9.55
 -10  -3   3 2694.00   26.35
 -10   3   3 2886.23   27.68
 -10   3   3 2856.59   27.94
 -10   3   3 2660.69   21.93
 -10   3   3 2774.69   26.73
 -10   3   3 2756.25   25.57
 -10  -3   3 2748.51   25.01
   3   3 -11  730.59   15.05
  -3  -3  11  687.41   13.01
  -3   3  11  615.86   14.58
  -3   3  11  620.12   11.31
  -3   3  11  648.52   10.52
   3   3 -11  554.50    9.69
  -5   3  -7 2382.39   24.28
   5   3   7 2290.70   23.65
  -5  -3  -7 2265.37   24.16
  -5   3  -7 2419.25   24.67
  -5  -3  -7 2292.63   20.31
  -5   3  -7 2388.08   24.23
  -5   3  -7 2312.90   26.62
   2   5   6  211.27    7.81
  -2   5  -6  238.37    9.34
  -2   5  -6  211.05    7.85
  -2   5  -6  203.29    8.43
   2   5   6  204.84    8.94
   2   5   6  211.01    6.92
  -2   5  -6  216.86    7.49
  -2  -5  -6  212.57    7.42
   2   5   6  211.68    8.60
 -11   0   1   -0.38    3.35
 -11   0   1    1.37    3.82
 -11   0   1   -0.48    3.21
 -11   0   1    0.32    4.39
 -10   3   5 4657.42   36.40
 -10   3   5 4738.01   35.40
 -10   3   5 4822.65   32.66
 -10  -3   5 4801.42   33.85
 -10  -3   5 4641.43   35.36
 -10   3   5 4849.25   35.87
 -11  -1   7    5.57    4.35
 -11   1   7    4.09    4.70
 -11   1   7    4.92    4.31
 -11  -1   7    5.45    3.30
 -11  -1   7    5.83    3.81
 -11   1   7    4.34    3.85
 -11   1   7    5.80    5.05
   2   6   2  436.40   12.03
   2   6   2  468.21   10.41
  -2   6  -2  476.98   11.32
  -2   6  -2  416.03   10.19
  -2   6  -2  422.76    8.91
  -2   6  -2  455.56   11.00
  -2   6  -2  448.70   10.60
   2   6   2  462.23   11.63
   6   4  -9 1754.64   19.48
   6   4  -9 1705.14   20.55
  -6   4   9 1729.42   20.14
   6   4  -9 1657.34   18.84
  -6  -4   9 1717.61   21.32
  -6   4   9 1719.57   20.52
  -5  -5  -3 9645.27   49.57
  -5   5  -3 9297.23   50.30
  -5   5  -3 9357.50   49.81
  -5   5  -3 9439.40   48.57
  -5   5  -3 9418.07   47.00
  -5   5  -3 9571.47   40.75
   5   5   3 9633.03   55.73
   6   3   6 1137.29   16.84
  -6   3  -6 1070.42   16.35
  -6   3  -6 1186.21   17.37
  -6  -3  -6 1103.73   17.01
  -6   3  -6 1137.12   18.90
  -6   3  -6 1140.11   17.31
  -6   2  -7  501.07    9.95
   6   2   7  493.97   10.88
  -6  -2  -7  483.76    9.32
  -6   2  -7  494.48   11.47
  -6   2  -7  505.29   12.57
  -6  -2  -7  475.85   10.49
  -6   2  -7  518.02   12.84
  -8   4   7  366.75   12.08
  -8   4   7  350.46    9.56
  -8   4   7  355.72    9.74
  -8   4   7  353.45    9.87
  -8   4   7  359.08    8.30
  -8  -4   7  393.64   11.12
  -8  -4   7  372.21   10.04
   8   4  -7  368.70   11.03
  -5   2  -8 1640.05   20.11
  -5   2  -8 1741.79   18.83
  -5   2  -8 1741.34   22.50
  -5   2  -8 1701.96   21.76
   5   2   8 1602.65   19.93
   5   2   8 1639.95   19.63
  -5  -2  -8 1597.26   17.34
  -5  -2  -8 1697.69   18.35
   1   1 -12 5784.54   35.90
   1  -1 -12 5766.76   38.71
  -1   1  12 6010.88   39.35
   1   1 -12 5571.02   35.89
  -1  -1  12 5965.93   37.80
  -1   6  -3   41.79    5.10
   1   6   3   27.05    3.72
  -1   6  -3   27.16    3.58
   1   6   3   39.29    5.10
  -1   6  -3   34.96    4.81
  -1   6  -3   29.01    4.67
   1   6   3   23.97    5.56
   1   6   3   39.19    5.62
  -1   6  -3   22.62    4.67
   6   5  -6   52.77    3.99
  -6  -5   6   45.10    5.14
  -6   5   6   47.39    6.01
  -6   5   6   44.24    4.99
  -6   5   6   55.93    5.17
  -6   5   6   55.30    6.61
  -6   5   6   50.99    4.40
  -3   6   3 6433.89   41.14
   3   6  -3 7031.35   39.66
  -3   6   3 6384.49   37.72
  -3   6   3 6860.25   39.98
   3   6  -3 6363.52   36.03
  -3   6   3 6296.16   42.63
   3   6  -3 6656.54   42.61
  -4   3  -8  358.56    9.57
   4   3   8  343.44    9.25
  -4   3  -8  370.04   11.30
  -4  -3  -8  363.68    8.25
  -4   3  -8  347.35    9.93
   7   5  -3 2159.57   25.27
  -7  -5   3 2410.91   24.94
  -7   5   3 2568.70   27.97
  -7   5   3 2275.86   22.88
  -7   5   3 2381.21   24.76
  -7   5   3 2283.56   19.62
 -10   0  -2 1404.80   18.71
 -10   0  -2 1421.93   15.37
 -10   0  -2 1369.91   18.85
 -10   0  -2 1363.57   18.87
  -5  -5   7 2172.57   21.98
  -5   5   7 2309.47   26.53
  -5   5   7 2283.46   22.71
  -5   5   7 2305.91   23.72
  -5   5   7 2183.90   18.54
  -5   5   7 2276.31   24.73
   5   5  -7 2430.63   23.10
   5   5  -7 2285.12   23.93
  -4   2  12  330.45    9.24
  -4   2  12  350.89   10.77
   4   2 -12  292.04    9.98
  -4   2  12  303.80    8.47
  -5   3  11 2402.54   21.14
   5   3 -11 2485.87   26.70
  -5  -3  11 2450.07   25.24
  -5   3  11 2371.58   26.39
  -5   3  11 2372.83   23.64
   7   5  -2 2233.56   24.51
  -7   5   2 2330.62   23.94
  -7   5   2 2434.69   24.97
  -7  -5   2 2371.06   24.90
   7   5  -2 2326.06   21.12
  -7   5   2 2222.71   25.79
   2   3 -11   72.89    6.51
   2   3 -11   57.81    4.27
  -2  -3  11   66.90    4.86
  -2   3  11   63.98    4.92
  -2   3  11   79.11    7.11
   1   3  1010961.20   58.42
  -1  -3 -1010727.10   51.44
  -1   3 -1010542.60   53.13
   1   3  1010403.10   50.33
  -1   3 -1010252.60   45.78
  -1   3 -1010407.50   52.42
  -1   3 -1010604.60   53.81
 -10   3   2 2051.77   23.20
 -10  -3   2 2019.39   18.70
 -10   3   2 2047.20   22.90
 -10   3   2 1976.03   20.08
 -10   3   2 2026.13   23.57
 -10  -3   2 2028.09   23.05
  -8  -4  -1   15.99    3.01
  -8  -4  -1   23.37    4.78
  -8   4  -1   16.61    3.66
  -8   4  -1   17.95    3.45
  -8   4  -1   18.05    4.69
  -8   4  -1   21.88    5.01
  -7   4  -3  327.71    9.33
  -7   4  -3  337.02   10.08
  -7   4  -3  348.13    8.59
  -7  -4  -3  362.96   10.33
  -7   4  -3  325.33   10.15
  -3   2  12 1120.65   18.15
   3   2 -12 1123.19   17.59
   1   6  -4 1734.63   17.79
  -1   6   4 1820.79   20.81
   1   6  -4 1756.57   20.62
  -1   6   4 1773.50   21.32
   1   6  -4 1811.86   20.91
  -1   6   4 1772.70   21.05
  -1   6   4 1776.18   21.37
   3   6   1  444.62   11.53
  -3   6  -1  433.27   10.21
  -3   6  -1  473.68   11.30
  -3   6  -1  393.54    8.68
   3   6   1  428.54    8.45
  -3   6  -1  449.04   10.40
   3   6   1  482.06   10.00
  -7   1  12  396.10    9.69
  -7  -1  12  412.06   10.93
   7   5  -4  356.31   11.34
  -7   5   4  338.83    8.36
  -7   5   4  386.93   10.82
  -7   5   4  377.50    9.40
  -7   5   4  354.61    7.76
  -7   5   4  399.87   12.26
  -7  -5   4  368.69   10.37
  -9   0  -4 9612.78   50.90
  -9   0  -4 9190.37   50.40
  -9   0  -4 9437.33   44.21
  -9   0  -4 8933.69   47.71
  -2   6   4  467.75   11.87
  -2   6   4  484.75   11.27
   2   6  -4  487.09    9.74
   2   6  -4  493.95   11.43
  -2   6   4  511.18   11.33
   2   6  -4  529.42   11.63
 -11   0   8  199.39    7.54
 -11   0   8  207.43    7.64
 -11   0   8  195.66    8.25
  -9  -2  -3   40.14    4.34
  -9   2  -3   41.31    5.04
  -9   2  -3   41.29    5.05
  -9   2  -3   38.86    4.95
   9   2   3   51.39    4.42
  -9   2  -3   31.01    5.60
  -5   2  12 1222.60   18.21
  -5   2  12 1186.22   15.44
  -5  -2  12 1248.69   18.66
  -5   2  12 1211.12   17.26
   5   2 -12 1267.27   19.42
 -10   3   6 1405.57   19.61
 -10  -3   6 1564.46   19.16
 -10   3   6 1431.90   19.05
 -10   3   6 1470.96   21.39
 -10  -3   6 1423.34   19.99
 -10   3   6 1520.04   18.71
  -7   2  -6 6125.27   42.65
  -7   2  -6 6241.57   34.82
  -7   2  -6 6204.76   39.18
  -7   2  -6 6080.85   34.34
   7   2   6 6297.45   37.04
  -7  -2  -6 6251.40   38.59
 -11  -2   4    1.69    3.49
 -11   2   4    6.33    4.08
 -11   2   4    1.68    4.45
 -11   2   4    4.69    3.27
 -11   2   4   -0.42    4.46
 -11  -2   4    0.14    3.90
 -11   1   1  273.67    9.29
 -11  -1   1  281.10    7.59
 -11   1   1  307.79   10.05
 -11   1   1  277.94    7.50
 -11  -1   1  257.14    8.21
 -11  -1   1  302.33    8.98
 -11   1   1  294.69    8.31
  -9   0  11    2.18    3.47
  -9   0  11    0.75    5.01
   9   2 -10   16.88    3.38
  -9   2  10   19.23    4.90
  -9  -2  10   17.93    3.98
  -9   2  10   17.11    3.19
  -9  -2  10   19.47    4.91
  -9   2  10   14.47    5.63
  -9   2  10   20.31    4.69
  -9  -2  10   17.02    3.06
  -9   4   3   86.01    6.66
  -9   4   3  103.16    5.40
  -9   4   3   95.15    6.84
  -9   4   3   98.36    4.96
  -9  -4   3   96.03    6.24
  -9  -4   3   98.64    6.88
  -9   4   4 2678.54   23.14
  -9  -4   4 2690.12   25.17
  -9   4   4 2638.61   22.28
  -9   4   4 2721.89   28.92
  -9   4   4 2640.76   22.61
  -9  -4   4 2695.46   27.08
 -11   2   5  444.45   10.38
 -11   2   5  443.72   11.39
 -11   2   5  463.53   10.41
 -11  -2   5  470.10   10.65
 -11   2   5  461.72   10.39
  -4   2  -9  416.69    9.30
  -4   2  -9  416.03   10.50
   4   2   9  421.39   10.41
  -4  -2  -9  445.03    9.94
  -4   2  -9  432.20   11.34
   7   5  -1 3275.72   27.20
  -7  -5   1 3212.46   30.27
   2   0  11    0.75    3.76
  -2   0 -11   15.47    4.55
  -7   3  -5 1284.72   18.26
   7   3   5 1282.72   17.22
  -7   3  -5 1254.28   17.19
  -7   3  -5 1281.63   19.55
  -7  -3  -5 1297.56   18.06
  -7   3  -5 1284.30   15.61
   0   6   4   11.33    3.86
   0   6   4    9.65    4.63
   0   6  -4    8.19    4.53
   0   6  -4   10.15    3.17
   0   6   4   11.22    4.61
   0   6  -4    7.75    3.99
   0   6  -4   12.30    4.34
   0   6   4   11.35    4.87
 -10   0  10 5466.34   41.01
 -10   0  10 5458.41   32.12
 -11  -2   3  317.08    7.59
 -11   2   3  322.76    9.76
 -11  -2   3  355.34    9.17
 -11   2   3  325.21   10.37
 -11   2   3  324.00    9.69
 -11  -2   3  337.06    8.93
 -10  -2  -1  350.27    9.38
 -10   2  -1  340.85    7.90
 -10   2  -1  356.81    9.29
 -10   2  -1  374.66    9.59
 -10   2  -1  330.11   10.40
 -10  -2  -1  376.66    8.98
 -10  -1  -2  760.10   13.68
 -10   1  -2  732.23   13.46
 -10   1  -2  716.84   12.35
 -10   1  -2  716.38   14.52
 -10  -1  -2  732.40   12.85
 -10  -1  -2  734.36   13.83
  -1   5  -7  723.18   13.36
   1   5   7  693.58   12.77
   1   5   7  726.50   13.63
   1   5   7  693.01   10.81
   1   5   7  737.49   13.64
  -1   5  -7  696.26   13.69
  -1   5  -7  748.45   12.39
  -1   5  -7  713.23   15.20
   1   5   7  778.68   14.49
  -8   2  11   18.23    5.26
  -8  -2  11   15.11    4.29
  -8   2  11   17.06    3.98
  -8   2  11   11.77    5.20
  -8  -2  11   21.64    4.76
   3   4 -10  127.95    7.56
   3   4 -10  171.52    7.74
  -3   4  10  148.06    6.34
   3   4 -10  129.09    4.61
  -3  -4  10  182.53    6.62
   3   4 -10  132.61    6.11
  -3   4  10  140.97    8.20
   0   0  12  169.73    7.16
   0   0 -12  174.33    7.10
  -4   6   2   87.92    6.38
   4   6  -2   85.32    4.86
  -4   6   2   80.76    4.46
   4   6  -2   81.24    5.72
   4   6  -2   80.21    5.33
  -4   6   2   77.53    5.27
  -4   6   2   72.88    6.43
  -4   6   2   76.08    4.68
  -9   4   2   29.16    3.91
  -9   4   2   26.23    5.40
  -9   4   2   27.77    5.37
  -9  -4   2   25.27    5.09
  -9  -4   2   26.47    4.20
  -9   4   2   33.93    5.21
   4   6  -1 2701.07   21.25
  -4   6   1 2370.71   24.44
  -4  -6   1 2474.23   19.97
  -4   6   1 2451.64   21.91
  -4   6   1 2572.64   25.88
  -4   6   1 2675.73   23.14
   4   6  -1 2578.20   24.40
   4   6  -1 2490.69   22.90
  -9  -4   5   -1.43    4.26
  -9   4   5    2.88    5.30
  -9   4   5   -0.64    3.30
  -9   4   5    1.64    3.63
  -9   4   5    2.28    3.02
  -9   4   5    2.12    4.62
  -2   2  12 1397.00   17.90
   2   2 -12 1343.02   18.33
  -2  -2  12 1397.72   17.72
  -2   2  12 1306.99   19.90
  -3   5   8  462.75   11.24
  -3   5   8  498.64   12.34
  -3   5   8  485.26    8.74
   3   5  -8  508.12   11.24
   3   5  -8  523.85   10.63
  -3   6   4 1099.63   16.27
  -3   6   4 1081.97   17.40
  -3   6   4 1014.22   15.67
   3   6  -4 1099.68   13.34
   3   6  -4 1031.29   15.10
   3   6  -4 1171.76   17.20
  -3   6   4 1053.52   15.41
  -3   3  -9 1403.98   20.05
  -3   3  -9 1190.67   14.24
   3   3   9 1346.31   17.34
  -3   3  -9 1300.97   16.45
  -3  -3  -9 1292.21   15.60
   3   3   9 1395.11   18.80
  -3   3  -9 1359.12   18.01
   3   3   9 1246.16   17.57
  -2   5   8 2553.32   28.63
  -2   5   8 2146.71   23.00
   2   5  -8 2498.23   25.46
   2   5  -8 2386.76   23.83
  -2   5   8 2462.67   23.96
   2   5  -8 2104.02   23.59
  -2   5   8 2236.74   19.59
   2   5  -8 2350.82   21.39
   6   0   8  568.12    9.20
  -6   0  -8  616.39   11.84
  -6   0  -8  593.09   13.31
  -6   0  -8  587.99   12.19
  -4   4  10 1264.52   19.81
  -4  -4  10 1249.00   16.49
   4   4 -10 1228.92   13.19
  -4   4  10 1250.91   15.11
  -4   4  10 1217.32   16.23
 -11   2   6 2412.77   21.95
 -11   2   6 2244.82   24.69
 -11   2   6 2413.14   24.24
 -11  -2   6 2318.82   22.57
 -11   2   6 2332.81   23.30
 -11  -2   6 2448.02   24.53
 -11   2   6 2330.23   24.06
  -1   2 -11   44.17    4.79
  -1   2 -11   37.92    4.52
   1   2  11   40.17    5.98
  -1  -2 -11   47.44    5.13
  -1   2 -11   37.49    3.88
   1  -2  11   34.31    3.61
  -6   5  -2  232.53    7.41
  -6   5  -2  261.84    9.05
  -6   5  -2  265.43    9.12
  -6   5  -2  263.54    8.61
  -6  -5  -2  247.81    6.50
  -6  -5  -2  229.49    8.23
  -6   3  11  470.32   11.49
  -6   3  11  463.73    9.69
  -6  -3  11  517.09   12.13
  -6   3  11  460.78   10.65
   6   3 -11  506.38   11.27
  -6   3  11  461.07   11.33
   6   3 -11  495.00   12.34
  -7   5   5  219.67    7.12
  -7   5   5  238.33    9.74
  -7   5   5  237.49    6.81
   7   5  -5  231.73    9.22
  -7  -5   5  269.47    8.79
  -7   5   5  240.87    7.54
  -7   5   5  261.13    8.89
  -9  -1  -4  340.24    9.25
  -9   1  -4  363.92    9.61
  -9  -1  -4  333.39    9.37
  -9   1  -4  341.89   10.04
  -9   1  -4  336.57    9.17
  -9  -1  -4  326.29    9.75
  -9   1  -4  330.23   10.07
 -11   1   8  327.10    9.24
 -11   1   8  319.52    9.58
 -11   1   8  305.29    9.92
 -11  -1   8  318.64    9.58
 -11  -1   8  322.72    7.99
 -11   1   8  316.01    9.44
 -11  -1   8  297.87    7.94
 -11  -1   8  311.72    9.04
  -9   1  11   70.75    6.62
  -9   1  11   65.21    4.82
  -9  -1  11   63.88    6.18
  -9  -1  11   63.73    5.70
  -9   1  11   65.37    6.72
  -1   3  11  325.70   10.76
   1   3 -11  315.18   10.04
   1   3 -11  302.79    8.03
  -1  -3  11  320.67    7.70
   2   6   3  624.45   11.28
   2   6   3  639.92   13.49
  -2   6  -3  597.43   11.90
  -2   6  -3  682.89   12.77
  -2   6  -3  572.06   10.43
  -2   6  -3  623.64   11.85
   2   6   3  642.62   13.64
  -2   6  -3  621.32   11.90
 -10   3   1   37.85    5.21
 -10  -3   1   41.56    3.92
 -10   3   1   41.09    5.03
 -10   3   1   38.28    5.13
 -10   3   1   45.61    5.00
 -10  -3   1   38.43    3.90
   1   4   9  178.26    6.58
   1   4   9  155.70    7.49
  -1   4  -9  157.40    7.72
   1   4   9  166.29    6.06
  -1   4  -9  160.33    5.01
   1   4   9  149.37    6.14
  -1   4  -9  178.58    7.28
  -1   4  -9  156.29    7.99
  -1  -4  -9  163.30    6.32
  -6   2  12 3893.97   31.93
  -6   2  12 3824.97   23.54
  -6   2  12 3820.35   26.15
   6   2 -12 3902.74   33.20
  -6   2  12 3846.26   29.86
  -2   4  10 1939.27   19.35
  -2   4  10 1954.82   24.49
   2   4 -10 1931.68   20.78
  -2   4  10 1798.34   16.69
   2   4 -10 1974.37   23.05
   2   4 -10 2099.72   23.36
 -10   2   9   10.53    4.62
 -10   2   9   11.48    4.39
 -10  -2   9   11.58    4.34
 -10  -2   9   12.62    3.39
 -10   2   9   11.13    4.88
 -10  -2   9   13.55    3.48
 -10   2   9   13.73    3.65
  -5   4  -6 2437.27   26.59
   5   4   6 2441.94   23.62
  -5   4  -6 2392.56   22.90
 -11   0   0 9852.75   49.73
 -11   0   0 9798.53   50.82
  -4   6   3 1515.06   19.34
   4   6  -3 1682.35   17.37
  -4   6   3 1623.56   20.97
   4   6  -3 1636.58   16.69
  -4   6   3 1611.74   17.29
  -4   6   3 1483.93   17.98
   4   6  -3 1631.93   19.59
  -4   6   3 1489.21   14.42
  -5   0  -9    0.54    3.51
  -5   0  -9    0.05    3.76
   5   0   9   -1.25    2.77
  -7   0  -7    1.64    4.70
  -7   0  -7    1.45    3.05
  -7   0  -7    0.17    3.59
  -7   0  -7    1.51    3.87
   4   6   0 1414.85   15.10
   4   6   0 1416.53   18.59
  -4   6   0 1360.89   16.71
  -4   6   0 1431.75   16.75
   4   6   0 1360.82   15.59
  -4   6   0 1378.40   18.03
  -4  -6   0 1360.43   14.85
  -2   1 -11 5255.19   34.66
   2  -1  11 5168.69   30.84
  -2  -1 -11 5153.85   34.55
  -4   4  -7 4678.50   34.82
   4   4   7 4966.50   33.43
  -4   4  -7 5203.88   38.71
  -4   4  -7 4855.28   32.16
  -4   4  -7 4987.79   28.36
   4   4   7 4604.98   35.66
  -4   4  -7 4724.22   28.86
  -4  -4  -7 5123.92   35.19
   4   4   7 4669.35   30.62
  -3   6  -2   33.87    4.33
   3   6   2   29.57    4.03
  -3   6  -2   23.54    3.73
   3   6   2   36.78    5.39
  -3   6  -2   35.34    4.90
  -3   6  -2   31.95    4.03
  -3   6  -2   31.58    5.13
 -10  -1  10 1665.69   20.60
 -10   1  10 1747.45   22.12
 -10   1  10 1743.51   19.38
 -10   1  10 1666.76   21.78
 -10   1  10 1541.82   16.21
 -10  -1  10 1642.13   18.96
 -10  -1  10 1585.76   16.36
  -4   5   8   24.83    3.90
  -4   5   8   17.32    6.18
  -4   5   8   23.59    4.58
  -4  -5   8   28.11    3.44
   4   5  -8   18.07    3.90
   4   5  -8   32.74    4.85
   4   5  -8   28.69    4.27
  -4   5   8   38.70    5.82
  -8   0  12  790.53   13.03
  -8  -3  10  108.92    6.95
  -8   3  10   86.37    5.25
  -8  -3  10   83.91    4.10
   8   3 -10   95.95    4.85
   8   3 -10   90.50    6.31
  -8   3  10   87.70    5.60
  -8   3  10   95.75    6.02
  -8   3  10   76.20    6.79
 -11   2   2  696.74   13.88
 -11  -2   2  723.93   11.54
 -11   2   2  723.29   13.77
 -11   2   2  723.71   13.15
 -11  -2   2  705.47   11.72
 -10  -3   7   11.73    4.83
 -10   3   7   18.49    5.11
 -10   3   7   14.68    4.53
 -10   3   7   13.77    4.56
 -10   3   7   11.56    4.30
 -10  -3   7   14.50    4.12
  -1   5   8 3817.65   27.18
   1   5  -8 4199.73   32.57
  -1   5   8 4142.61   30.48
   1   5  -8 4262.24   33.43
  -1   5   8 3990.66   30.82
  -1   5   8 4308.53   35.80
   1   5  -8 3926.41   31.13
   1   5  -8 3915.81   27.05
  -7  -5   0  408.44   10.59
   7   5   0  401.29    9.06
   7   5   0  421.99   10.80
  -1   6  -4 3346.62   28.99
  -1   6  -4 3239.89   24.52
   1   6   4 3366.16   29.32
  -1   6  -4 3197.65   25.03
   1   6   4 3371.48   26.48
  -1   6  -4 3361.90   27.62
   1   6   4 3383.13   29.80
   1   6   4 3414.61   23.88
  -1   6  -4 3394.07   27.66
  -8   2  -5 1208.68   17.23
  -8   2  -5 1249.67   18.42
  -8  -2  -5 1157.74   17.34
  -8  -2  -5 1307.48   16.14
   8   2   5 1304.46   15.97
  -8   2  -5 1243.98   15.90
  -8   2  -5 1272.45   18.17
  -9   3  -2 2074.43   22.24
  -9   3  -2 2039.65   21.77
  -9   3  -2 2052.24   21.62
  -9   3   9   19.46    5.57
   9   3  -9   18.27    4.17
  -9   3   9   23.36    4.77
  -9  -3   9   21.65    4.83
  -9   3   9   19.26    4.21
  -9   3   9   17.01    3.53
  -9  -3   9   22.52    3.43
   0   1  12 1607.31   19.21
   0  -1 -12 1555.68   18.88
   0  -1  12 1603.39   18.20
  -7  -4   9  466.80   11.58
  -7  -4   9  371.31    8.25
   7   4  -9  398.32    9.72
   7   4  -9  409.47    9.68
   7   4  -9  435.50    8.36
  -7   4   9  355.46   11.68
  -7   4   9  443.31   10.42
  -7   4   9  409.67   10.64
  -5   4  10 1780.11   23.19
   5   4 -10 1705.98   20.71
   5   4 -10 1549.21   15.24
   5   4 -10 1665.25   19.64
  -5   4  10 1584.37   17.99
  -5  -4  10 1690.55   19.38
  -5   4  10 1614.71   18.72
   8   4  -8  277.13    8.82
  -8  -4   8  280.96    8.06
  -8  -4   8  283.15    9.19
  -8   4   8  277.69    8.62
  -8   4   8  269.13    8.30
  -8   4   8  304.85   10.60
   4   0 -13   -0.04    3.30
   4   0 -13    1.66    3.37
  -4   0  13    0.99    4.41
  -4   0  13    0.54    3.60
   4   5   5  410.92    9.67
  -4   5  -5  411.42    8.39
  -4  -5  -5  427.52   10.04
  -4   5  -5  422.47   11.26
  -4   5  -5  404.88    8.71
   4   5   5  426.58   12.09
  -4   5  -5  444.71   11.48
  -4   5  -5  438.04    9.98
  -6  -5   7  142.17    6.79
   6   5  -7  152.91    7.07
   6   5  -7  132.86    5.31
  -6   5   7  133.47    6.39
  -6   5   7  152.21    7.79
  -6   5   7  145.69    7.50
  -6   5   7  134.77    6.72
  -9  -4   1 1276.55   15.50
  -9   4   1 1239.94   14.99
   9   4  -1 1275.24   16.06
  -9   4   1 1314.04   18.98
  -9  -4   1 1284.90   18.47
  -6  -4  -5  435.48   10.67
   6   4   5  452.36   10.42
  -6   4  -5  446.69   11.50
  -6   4  -5  458.23   11.02
  -6   4  -5  422.55    9.01
  -6   4  -5  456.78   10.63
  -6   1  -8 1756.53   21.29
  -6   1  -8 1665.21   21.16
   6   1   8 1704.74   17.42
  -6  -1  -8 1722.19   18.45
  -6   1  -8 1751.18   19.86
  -6  -1  -8 1664.47   18.92
  -6  -1  -8 1677.96   16.83
  -9   4   6 4848.06   34.78
  -9   4   6 4860.92   37.87
  -9   4   6 4689.78   30.07
  -9  -4   6 4988.33   36.40
  -9   4   6 4724.73   28.86
  -9  -4   6 4827.19   33.77
  -9   4   6 4933.85   32.43
  -3   2 -10    4.66    3.23
  -3   2 -10    5.68    2.69
   3   2  10    7.96    4.58
  -3   2 -10    3.46    3.77
  -3  -2 -10    4.74    3.76
   3   2  10   11.20    3.97
  -3   2 -10    4.85    3.72
   5   0 -13    0.35    3.60
  -5   0  13    0.44    4.31
   5   0 -13    8.84    3.18
  -5   0  13   -0.07    3.04
   3   5   6 7577.23   45.48
  -3   5  -6 7853.29   40.60
   3   5   6 7719.51   44.37
  -3  -5  -6 7507.62   40.56
   3   5   6 7494.36   34.54
   3   5   6 7675.95   39.17
  -3   5  -6 7924.34   44.89
  -3   5  -6 7841.60   47.12
  -3   5  -6 7677.22   39.09
  -2   6   5   26.56    4.88
   2   6  -5   -0.09    4.41
  -2   6   5   -0.41    3.79
  -2   6   5    4.39    4.68
   2   6  -5   22.72    4.54
  -2   6   5    0.57    4.12
 -11   2   7 2645.00   25.89
 -11   2   7 2680.31   24.61
 -11   2   7 2714.42   25.36
 -11  -2   7 2733.62   24.55
 -11  -2   7 2680.87   24.08
 -11  -2   7 2687.46   21.19
   1   6  -5 1641.66   15.37
   1   6  -5 1803.93   19.81
  -1   6   5 1712.96   20.15
  -1   6   5 1722.80   20.23
  -1   6   5 1714.22   19.41
   1   6  -5 1698.74   20.03
  -1   6   5 1634.65   19.18
 -11  -1   0  742.43   10.64
 -11   1   0  745.39   11.83
 -11   1   0  799.62   14.84
 -11  -1   0  762.66   12.69
 -11  -1   0  843.68   13.74
 -11  -1   0  810.90   13.41
 -11   1   0  822.00   14.26
 -11   1   0  767.14   11.60
 -11   1   0  806.93   11.79
  -5  -1  -9  434.49    9.06
  -5   1  -9  466.06   10.81
  -5  -1  -9  424.45    7.64
  -5  -1  -9  426.18    9.64
  -5   1  -9  438.99   10.71
   5   1   9  434.54    9.30
  -7  -1  -7  185.53    6.66
  -7   1  -7  181.43    5.77
  -7  -1  -7  179.80    6.24
   7   1   7  175.79    5.90
  -7   1  -7  195.58    8.35
  -7   1  -7  191.91    7.92
  -7   1  -7  183.77    7.17
  -7  -1  -7  197.52    7.40
  -7  -1  -7  175.59    7.31
  -3   0  13   -1.00    4.35
   3   0 -13    0.64    3.32
  -3   0  13    1.12    3.99
   3   0 -13    1.34    3.07
  -8   3  -4 2207.03   22.67
   8   3   4 2121.13   20.83
  -8  -3  -4 2114.23   21.70
  -8   3  -4 2187.91   22.84
  -8   3  -4 2050.46   21.07
  -8   3  -4 2116.47   20.65
  -5   5  -4 8422.23   46.62
  -5   5  -4 8583.31   46.00
   5   5   4 8654.62   43.07
  -5   5  -4 8477.05   43.78
  -5   5  -4 8269.52   34.11
  -5  -5  -4 8727.90   44.69
  -5   5  -4 8590.32   42.07
   4   6  -4  514.19   11.80
  -4   6   4  543.76   10.92
  -4   6   4  538.39   11.03
  -4   6   4  529.14   12.31
   4   6  -4  509.60   10.16
  -4   6   4  517.31   10.98
   1   4 -10   40.46    5.53
  -1   4  10   46.30    5.99
   1   4 -10   50.93    5.52
  -1   4  10   41.64    4.00
  -1   4  10   41.81    3.70
   1   4 -10   42.54    4.52
  -3   4  -8  362.55    8.30
  -3   4  -8  375.28   10.98
  -3   4  -8  359.73    7.53
   3   4   8  353.69    8.06
   3   4   8  373.88    9.18
  -3   4  -8  353.73    8.10
  -3   4  -8  345.17    9.93
   3   4   8  362.28    9.90
   3   4   8  387.36    9.43
  -8   4  -2  182.00    6.75
  -8   4  -2  178.51    7.81
  -8   4  -2  192.50    7.64
  -8   4  -2  188.65    7.76
  -8  -4  -2  193.93    7.97
  -8   4  -2  180.40    6.45
  -1   2  12  269.65   10.19
   1  -2 -12  271.31    8.93
  -1   2  12  280.49    8.49
   1   2 -12  254.47    6.75
   1   2 -12  277.01    8.60
  -1  -2  12  274.34    7.91
 -11   0   9    0.72    4.12
 -11   0   9    2.33    3.49
 -11   0   9   -0.08    3.33
  -8   1  12  460.35   11.98
  -8   1  12  394.08    8.31
  -8  -1  12  463.29   10.93
  -8   1  12  392.32    7.56
  -4   0 -10  331.12    9.29
  -4   0 -10  310.78    7.78
   4   0  10  342.13    8.03
  -4   6  -1 1004.76   13.53
   4   6   1  980.26   11.86
  -4  -6  -1  958.01   12.31
  -4   6  -1 1018.20   14.77
   4   6   1 1058.11   16.39
  -4   6  -1 1015.69   15.35
  -8   0  -6  157.33    6.17
  -8   0  -6  163.03    7.47
  -7   5   6  316.08    9.41
  -7   5   6  330.37   10.60
  -7   5   6  297.90    8.34
  -7   5   6  296.22    7.43
   7   5  -6  335.28    9.99
  -7  -5   6  324.57    9.37
  -3   6   5 2267.15   24.22
   3   6  -5 2394.10   23.05
   3   6  -5 2401.56   22.30
  -3   6   5 2227.74   21.85
  -3   6   5 2232.33   21.60
  -3   6   5 2285.62   22.40
  -5   5   8    0.90    4.21
  -5  -5   8    1.63    3.09
  -5   5   8   18.56    4.49
   5   5  -8    1.94    2.92
  -5   5   8    2.00    4.89
   5   5  -8    4.39    3.74
   5   5  -8   -0.72    3.63
  -5   5   8    1.24    5.02
  -4  -1  13 3703.02   29.46
   4   1 -13 3492.49   27.82
  -4   1  13 3449.33   27.70
   4  -1 -13 3505.99   27.18
  -4  -1  13 3284.54   24.80
  -4   1  13 3562.09   28.64
  -6   0  13    0.51    3.81
   6   0 -13    0.28    2.54
   0   6  -5 1237.97   14.82
   0   6   5 1319.87   17.77
   0   6  -5 1260.70   14.19
   0   6   5 1306.18   16.71
   0   6  -5 1329.60   16.66
   0   6  -5 1309.90   17.26
   0   6   5 1324.54   16.38
   0   6   5 1350.03   17.89
   0   6  -5 1323.53   18.03
  -7  -2  12 1911.95   21.73
  -7   2  12 1816.84   21.81
  -7   2  12 1843.53   18.68
  -7   2  12 1701.10   15.07
  -7   2  12 1692.87   15.81
 -12   0   5    1.43    2.58
 -12   0   5    0.33    4.22
  -7   3  11 2370.40   21.42
  -7   3  11 2302.92   24.56
   7   3 -11 2409.27   20.43
   7   3 -11 2487.40   25.41
  -7   3  11 2443.49   23.37
   2   3  10   58.34    5.40
  -2   3 -10   65.35    4.56
  -2   3 -10   59.90    5.14
   2   3  10   67.57    4.98
  -2   3 -10   79.73    4.65
  -2  -3 -10   61.55    4.78
  -2   3 -10   71.16    5.35
   0   5   8   29.60    2.90
   0   5   8   32.32    4.28
   0   5  -8   29.12    3.67
   0   5   8   26.24    3.99
   0   5   8   30.92    5.33
   0   5   8   27.17    4.97
   0   5  -8   32.08    5.04
   0   5  -8   41.16    4.97
   0   5  -8   25.95    4.95
  -5   1  13   80.01    5.56
  -5  -1  13   82.49    6.26
  -5   1  13   62.54    4.88
   5  -1 -13   66.90    4.40
  -5   1  13   73.91    5.24
   5   1 -13   78.48    6.03
 -10   3   0   10.24    4.38
 -10  -3   0    8.83    2.51
 -10  -3   0   14.11    3.82
 -10   3   0   10.50    4.22
 -10  -3   0   11.58    3.44
 -10   3   0   16.72    4.39
 -10   3   0   10.93    3.39
 -12   0   4  712.14   12.61
 -12   0   4  727.90   13.31
 -11  -2   1   40.77    3.87
 -11   2   1   43.81    5.33
 -11   2   1   46.88    4.38
 -11  -2   1   45.29    3.88
 -11   2   1   47.61    5.24
   0   3  11   49.23    5.77
   0  -3 -11   59.46    5.06
   0   3  11   61.78    4.98
   0   3 -11   54.54    5.26
   0   3 -11   51.43    4.32
   0   3 -11   58.00    5.53
 -10   0  -3   -1.20    4.19
 -10   0  -3    0.45    2.52
 -10   0  -3    1.24    3.67
 -10   0  -3    1.80    4.02
   2   5   7 3584.05   27.87
   2   5   7 3765.12   25.05
  -2   5  -7 3569.47   25.17
  -2   5  -7 3826.22   28.06
  -2   5  -7 3564.21   29.25
   2   5   7 3597.17   24.93
   2   5   7 3568.45   28.94
  -3  -1  13  328.81    9.33
   3   1 -13  332.02    8.96
   3  -1 -13  329.98    9.20
   3   1 -13  311.81    7.19
  -3   1  13  328.52    9.64
  -3   1  13  334.93    9.17
   7   4   4  344.52    9.18
  -7   4  -4  367.54    9.82
  -7   4  -4  349.99    9.70
  -7  -4  -4  329.90    9.43
  -7   4  -4  332.42    7.90
  -7   4  -4  353.11    9.65
   6   4 -10  238.75    6.36
  -6  -4  10  281.63    8.68
  -6   4  10  253.93    7.89
   6   4 -10  257.37    8.48
   6   4 -10  272.14    7.76
  -6   4  10  242.77    8.33
  -6   4  10  270.56    9.56
   5   6  -2  328.15    7.89
  -5   6   2  313.88    7.97
  -5  -6   2  290.95    7.24
   5   6  -2  309.04    6.42
  -5   6   2  348.16    9.75
  -5   6   2  323.44    9.08
   5   6  -2  314.88    8.44
  -5   6   2  294.85    7.49
 -11  -1   9   20.40    3.48
 -11  -1   9   25.19    4.38
 -11   1   9   21.23    3.66
 -11  -1   9   25.19    3.94
 -11   1   9   24.65    4.87
 -11   1   9   20.52    4.40
 -11  -1   9   21.84    3.48
 -11   1   9   27.69    4.91
   7   5   1   78.54    6.04
  -7  -5  -1   78.88    4.26
   2   0 -13    1.97    3.15
  -2   0  13    0.89    4.04
 -12   0   6 9653.89   49.29
 -12   0   6 9644.44   47.13
  -3   6  -3 3466.20   25.25
  -3   6  -3 3342.41   26.19
  -3   6  -3 3324.91   24.66
   3   6   3 3544.88   29.43
   3   6   3 3379.83   22.97
   3   6   3 3433.78   29.31
  -3   6  -3 3134.04   26.68
  -3   6  -3 3135.36   25.49
  -4  -1 -10 2503.31   22.76
   4   1  10 2493.91   21.79
  -4   1 -10 2362.53   21.76
  -4   1 -10 2380.92   22.74
  -8   1  -6 1856.52   19.38
  -8   1  -6 1811.59   21.32
  -8  -1  -6 1714.12   15.77
   8   1   6 1612.14   14.85
  -8   1  -6 1759.95   17.52
  -8  -1  -6 1726.93   18.39
  -8  -1  -6 1847.63   19.88
  -8  -1  -6 1816.46   20.21
  -8   1  -6 1815.24   21.35
  -2   6  -4    8.67    3.78
  -2   6  -4    6.75    3.29
  -2   6  -4    6.23    4.41
   2   6   4    2.09    4.49
  -2   6  -4    9.11    4.34
  -2   6  -4   14.17    4.00
   2   6   4   13.06    4.04
   2   6   4   13.08    4.69
   9   4   0  382.41    9.67
  -9  -4   0  412.00   10.30
  -9  -4   0  364.17    7.50
  -9   4   0  401.77   10.25
  -9   4   0  356.09    8.03
  -9   4   0  412.56   10.65
  10   2   2   21.67    3.12
 -10   2  -2   15.08    4.46
 -10  -2  -2   11.98    4.01
 -10   2  -2   13.10    3.74
 -10   2  -2   22.56    4.61
 -10   2  -2   18.81    3.73
 -10  -2  -2   26.64    3.42
  -9  -4   7 2175.16   23.70
   9   4  -7 2235.82   23.53
  -9   4   7 1985.65   18.47
  -9   4   7 2041.18   20.42
  -9   4   7 1889.84   20.01
  -9   4   7 2245.76   24.89
  -9   4   7 1925.34   17.18
  -9  -4   7 2004.20   20.13
  -5   6   1  367.28    9.87
  -5   6   1  335.00    8.03
   5   6  -1  327.01    8.17
  -5   6   1  329.13    8.22
   5   6  -1  353.92    9.05
  -5   6   1  351.15    9.87
  -5  -6   1  317.71    7.65
 -10  -3   8   39.50    5.15
 -10  -3   8   43.47    4.31
 -10   3   8   42.85    4.59
 -10   3   8   37.25    4.60
 -10   3   8   37.43    5.01
 -10   3   8   48.38    6.05
  -5  -6   3   60.12    4.01
   5   6  -3   67.26    3.81
  -5   6   3   72.58    5.60
   5   6  -3   76.59    5.53
  -5   6   3   68.32    4.04
  -5   6   3   70.29    5.90
  -5   6   3   65.98    4.69
   5   6  -3   75.27    3.97
  -6   5  -3  132.37    6.11
  -6  -5  -3  141.32    6.72
  -6   5  -3  147.74    7.06
  -6   5  -3  154.27    6.93
  -6   5  -3  153.69    6.43
   1   0  12  250.25    7.73
  -1   0 -12  218.75    7.74
 -12   0   3    1.57    3.18
 -12   0   3    7.69    3.97
 -12   0   3   -1.16    3.49
 -11   0  -1    1.31    3.61
 -11   0  -1    3.61    3.97
 -11   0  -1    2.48    3.34
  -6   1  13 6518.69   40.14
  -6   1  13 6500.92   36.27
 -12   1   5 2538.33   24.99
 -12   1   5 2653.09   24.17
 -12  -1   5 2618.81   23.32
 -12  -1   5 2566.64   22.82
  -9   2  -4  362.24    9.03
  -9   2  -4  404.53   10.64
  -9  -2  -4  396.46    8.61
  -9   2  -4  377.34    9.50
   9   2   4  412.74    8.55
  -9  -2  -4  410.66   10.21
  -9  -2  -4  352.65    9.15
  -9   2  -4  400.54   10.17
 -11   2   8  678.19   13.22
 -11   2   8  654.57   12.30
 -11   2   8  653.31   12.05
 -11  -2   8  670.13   11.67
 -11  -2   8  688.02   12.33
 -11   2   8  684.48   13.06
  -8   5   3  613.20   11.72
  -8   5   3  588.27   12.97
  -8   5   3  604.93    8.69
  -8  -5   3  684.37   12.61
   8   5  -3  686.38   13.15
  -8  -5   3  727.07   13.23
  -4   6   5  737.90   12.17
  -4   6   5  815.30   13.09
  -4   6   5  814.74   13.08
   4   6  -5  844.19   12.48
  -4   6   5  753.38   13.99
   4   6  -5  770.42   13.35
 -12  -1   4 1828.14   18.89
 -12   1   4 1818.76   20.00
 -12  -1   4 1854.77   19.21
 -12   1   4 1833.09   18.41
  -9   2  11   22.32    4.68
  -9   2  11   23.45    5.49
  -9  -2  11   18.53    3.52
  -9  -2  11   23.67    4.78
  -9   2  11   23.35    3.83
 -10   0  11    0.40    2.56
 -10   0  11   -1.03    4.35
 -10   0  11    1.81    4.38
  -2   4  -9  128.07    7.00
   2   4   9  135.29    6.32
  -2   4  -9  132.74    6.86
   2   4   9  134.38    5.80
   2   4   9  112.30    5.53
  -2  -4  -9  128.18    4.89
   2   4   9  116.68    4.53
  -2   4  -9  117.79    5.56
 -10  -1  -3  873.16   13.02
 -10   1  -3  873.74   13.96
 -10  -1  -3  904.23   13.82
 -10   1  -3  893.50   13.94
 -10  -1  -3  942.60   14.64
 -10   1  -3  922.07   14.94
 -10   1  -3  874.85   12.49
   0   4  10  695.56    9.91
   0   4  10  611.75   13.37
   0   4 -10  671.05   13.47
   0   4 -10  737.08   13.12
   0   4  10  773.05   11.52
   0   4 -10  708.49   12.63
   0  -4 -10  719.32   11.69
   4   6   2  322.85    9.51
  -4   6  -2  283.69    9.18
   4   6   2  222.59    5.84
  -4   6  -2  246.13    6.64
  -4   6  -2  311.93    7.48
  -4  -6  -2  283.52    6.71
  -4   6  -2  334.00    8.71
  -4   6  -2  289.10    7.61
  -8   5   4   94.41    5.61
  -8   5   4  104.26    4.71
  -8   5   4   79.66    7.21
   8   5  -4   98.42    6.34
  -8  -5   4  120.78    6.54
  -8  -5   4  109.43    6.40
   6   3   7  743.62   12.36
  -6   3  -7  759.45   12.96
  -6   3  -7  697.16   11.57
  -6   3  -7  782.60   14.38
  -6  -3  -7  688.35   10.34
  -6   3  -7  739.29   12.89
  -6  -3  -7  705.50   12.68
   8   5  -2 1027.50   15.10
  -8  -5   2 1073.14   16.05
  -8  -5   2 1047.93   14.55
  -5   3  -8   56.36    5.70
  -5   3  -8   61.17    5.00
   5   3   8   65.79    4.96
  -5   3  -8   57.07    5.06
  -2   2 -11 1225.77   15.23
  -2   2 -11 1109.51   13.50
  -2   2 -11 1131.93   14.04
  -2   2 -11 1150.27   13.77
   2   2  11 1269.05   16.32
   2   2  11 1225.65   18.20
  -2  -2 -11 1172.87   15.13
  -1   6  -5  609.03   11.40
  -1   6  -5  617.34   12.34
  -1   6  -5  627.33   10.88
   1   6   5  608.23   11.00
   1   6   5  640.75   12.64
   1   6   5  622.73    9.65
   1   6   5  597.85   12.22
  -1   6  -5  648.56   11.82
 -10  -2  10 7441.38   34.81
 -10  -2  10 7551.17   42.29
  10   2 -10 6915.43   33.07
 -10  -2  10 7499.88   36.30
 -10   2  10 7573.11   43.13
 -10   2  10 8197.31   41.72
 -10   2  10 7106.48   33.95
 -10   2  10 7856.51   45.65
  -5   6   0  102.89    7.13
   5   6   0  114.92    6.11
  -5  -6   0  100.78    4.91
  -5   6   0  113.67    5.73
   5   6   0  108.13    4.67
  -5   6   0  108.32    4.74
  -2  -1  13  142.67    6.56
  -2   1  13  156.13    7.35
  -2   1  13  158.17    6.92
   2  -1 -13  150.22    6.67
   2   1 -13  154.79    5.66
   2   1 -13  148.13    5.94
 -12   1   6 3050.90   27.10
 -12  -1   6 3003.30   24.40
 -12  -1   6 3101.97   25.29
 -12   1   6 3160.39   26.27
 -12   0   7    0.61    3.78
 -12   0   7    3.01    4.34
   3   0  11    1.81    3.07
  -3   0 -11    1.52    4.05
  -7   0  13   -0.04    3.72
  -9   0  -5    0.09    4.45
  -9   0  -5    2.37    4.16
  -9   0  -5    0.32    3.38
  -9   0  -5    0.33    2.95
   5   6  -4    1.15    4.05
  -5   6   4    2.58    4.65
  -5  -6   4    3.82    2.59
  -5   6   4    1.17    3.09
  -5   6   4    2.41    3.62
   5   6  -4    0.11    2.53
  -5   6   4    8.49    3.88
  -4   3  12  695.49   13.61
   4   3 -12  656.04   13.27
  -4  -3  12  674.47   11.79
  -9   0  12  350.54    8.45
  -9   0  12  397.24   11.12
   1   1  12 1492.57   17.48
   1  -1  12 1440.56   15.56
  -1   1 -12 1461.30   16.77
  -1  -1 -12 1471.55   17.64
   0   2 -12 1777.43   18.22
   0   2  12 1894.37   22.59
   0   2  12 1927.16   19.63
   0  -2 -12 1864.54   19.54
   0   2 -12 1760.62   16.46
   0  -2  12 1790.33   16.92
 -12   1   3    8.30    3.53
 -12  -1   3   12.08    2.96
 -12  -1   3   11.15    3.52
 -12   1   3   12.31    3.95
 -12  -1   3   10.94    3.36
 -12  -1   3   10.23    2.59
 -12   1   3   13.37    4.43
  -7   5   7  818.25   14.85
  -7  -5   7  864.93   13.75
  -7  -5   7  868.32   13.50
  -7   5   7  832.36   12.82
  -7   5   7  803.66   11.04
  -7   5   7  838.31   14.36
   7   5  -7  891.08   14.28
   6   5  -8    3.62    2.69
  -6   5   8    4.49    3.85
  -6   5   8    3.87    4.60
   6   5  -8    4.14    3.78
  -6  -5   8    0.96    3.39
  -6   5   8    4.46    4.26
  -6  -5   8    2.40    3.61
  -6   5   8    1.97    4.32
   2   6  -6   21.31    4.34
  -2   6   6   28.69    4.63
  -2   6   6   26.72    4.87
  -2   6   6   17.40    4.43
  -2   6   6   15.57    3.69
   2   6  -6   17.32    4.12
  -3  -3  12    4.66    3.20
  -3   3  12    2.78    2.94
  -3   3  12    2.63    4.75
   3   3 -12   -0.71    4.29
  -8   4   9 2976.23   24.46
  -8   4   9 2869.58   27.66
  -8  -4   9 2753.50   20.53
   8   4  -9 2908.10   23.57
  -8  -4   9 3157.25   26.70
  -8   4   9 2773.31   22.91
   8   4  -9 2688.60   20.30
  -6   2  -8 3370.95   20.60
   6   2   8 3659.74   25.65
  -6  -2  -8 3392.66   23.44
  -6   2  -8 3507.13   26.96
  -6  -2  -8 3308.78   21.56
  -6   2  -8 3684.08   30.15
  -6   2  -8 3484.95   28.69
 -11  -1  -1  442.82    9.21
 -11   1  -1  443.16   10.39
 -11   1  -1  451.84   10.59
 -11   1  -1  423.39    8.96
 -11  -1  -1  448.27    9.93
 -11   1  -1  427.68    8.28
 -11  -1  -1  473.48   10.07
 -12   0   2  520.72   10.80
 -12   0   2  496.72    8.22
 -12   0   2  552.51    9.98
 -12   0   2  565.38   10.74
  -3   5   9   82.86    6.22
  -3   5   9   74.09    5.28
   3   5  -9   90.23    5.74
   3   5  -9   69.18    4.23
   3   5  -9   72.68    5.21
  -8   5   5  581.12   11.09
  -8  -5   5  595.31   11.93
   8   5  -5  620.31   12.62
  -8  -5   5  560.53   12.02
  -8   5   5  547.65    9.81
  -8   5   5  610.56   13.27
  -9   3  -3 2083.73   20.11
   9   3   3 1986.51   19.25
  -9   3  -3 2056.39   20.80
  -9   3  -3 2047.27   20.80
  -9   3  -3 1988.20   20.32
  -9  -3  -3 2020.23   19.70
  -5   3  12  717.14   10.89
  -5   3  12  705.02    8.90
  -5   3  12  716.82    9.49
   5   3 -12  877.32   14.15
  -5   3  12  773.15   11.85
  -5  -3  12  871.33   13.82
  -5   3  12  785.67   13.79
   5   3 -12  791.82   14.37
  -7   3  -6   33.64    4.07
  -7   3  -6   38.07    5.03
  -7  -3  -6   37.37    3.89
  -7   3  -6   38.42    4.66
   7   3   6   43.17    4.38
  -7  -3  -6   39.86    4.42
  -7   3  -6   39.76    5.05
 -11   3   4 5976.69   37.68
 -11   3   4 5928.19   36.66
 -11  -3   4 5929.52   34.41
 -11   3   4 6043.16   36.14
  -1   6   6  101.67    5.80
  -1   6   6  117.20    6.14
   1   6  -6  112.77    5.77
  -1   6   6  122.50    6.43
   1   6  -6  132.04    6.40
   1   6  -6   83.14    4.38
  -1   6   6   90.39    5.26
  -9   3  10 1575.02   20.61
   9   3 -10 1410.92   14.47
  -9  -3  10 1619.23   19.48
  -9   3  10 1521.42   17.10
  -9  -3  10 1431.95   13.87
   9   3 -10 1571.88   17.88
  -9   3  10 1615.68   17.73
  -1   5  -8    0.58    4.32
  -1   5  -8    2.23    3.52
   1   5   8    3.81    2.50
  -1   5  -8    1.69    4.36
   1   5   8    2.82    3.40
  -1   5  -8    1.40    2.86
   1   5   8    4.64    3.00
   1   5   8    3.98    4.18
 -10   1  11  453.09   11.31
 -10  -1  11  463.72    9.78
 -10  -1  11  475.08   10.50
 -10   1  11  465.97    9.14
   3   6  -6 8418.21   42.09
  -3   6   6 8051.90   44.88
  -3   6   6 8195.19   42.10
  -3   6   6 8355.48   42.75
   3   6  -6 8034.70   41.60
  -3   6   6 7977.89   39.18
 -11   3   5 1206.49   17.03
 -11  -3   5 1288.95   16.07
 -11   3   5 1277.75   16.24
 -11   3   5 1185.33   15.36
 -11   3   5 1223.34   14.38
 -11   2   0  848.87   14.09
 -11   2   0  756.77   10.35
 -11   2   0  736.22   10.58
 -11  -2   0  836.27   11.02
 -11   2   0  827.46   13.77
 -11  -2   0  787.04   12.05
 -11   2   0  817.00   12.59
   4   3   9 4143.93   28.36
  -4   3  -9 3783.37   26.93
   4   3   9 3762.73   27.15
  -4  -3  -9 3750.13   23.13
  -4   3  -9 3835.92   27.02
   4   3   9 3776.23   25.99
  -4   3  -9 4097.54   31.78
   2   5  -9   26.17    4.40
   2   5  -9   29.03    3.30
   2   5  -9   41.33    5.16
  -2   5   9   36.81    4.36
   2   5  -9   32.45    4.53
  -2   5   9   55.80    6.57
  -2   5   9   44.74    5.94
  -8  -5   1 1339.89   15.29
   8   5  -1 1316.04   14.68
  -8  -5   1 1359.11   17.40
   1   0 -13    0.53    3.45
  -1   0  13    1.22    3.63
   5   2   9   20.56    3.53
  -5   2  -9   20.73    3.95
  -5   2  -9   20.91    4.38
  -5  -2  -9   22.23    3.19
  -5   2  -9   20.42    2.79
   5   2   9   22.91    3.41
  -7  -2  -7  151.21    5.92
  -7   2  -7  176.34    7.74
  -7   2  -7  157.23    7.34
   7   2   7  166.72    6.02
  -7   2  -7  145.65    6.50
 -11   0  10  137.16    5.10
 -11   0  10  128.27    6.21
   4   5  -9  123.48    6.04
  -4   5   9  126.87    7.10
  -4   5   9  119.19    5.95
   4   5  -9  100.27    5.39
  -4   5   9  115.45    7.22
   4   5  -9  103.80    4.89
  -8  -2  12  385.22    9.31
  -8   2  12  375.86    7.66
  -8  -2  12  427.92   10.59
  -8   2  12  409.24   10.46
  -8   2  12  420.71   10.83
 -12  -1   7    3.68    3.56
 -12   1   7    3.65    2.78
 -12  -1   7    3.90    3.73
 -12   1   7   11.55    4.40
 -12   1   7    3.72    3.92
 -11  -3   3 1564.60   17.80
 -11   3   3 1542.62   18.12
 -11   3   3 1514.49   17.60
 -11  -3   3 1571.13   16.80
 -11   3   3 1522.16   18.23
  -3   1 -11  218.93    7.22
   3   1  11  213.90    6.77
  -3   1 -11  190.70    5.67
   3  -1  11  184.70    5.13
  -3  -1 -11  215.74    7.24
  -7   1  13    3.84    4.09
  -7  -1  13    6.02    3.74
  -7   1  13    7.65    3.18
 -10   3  -1   47.73    5.05
 -10   3  -1   43.49    4.55
 -10  -3  -1   38.19    4.04
 -10  -3  -1   51.58    4.41
 -10   3  -1   41.58    4.57
 -10   3  -1   37.86    3.28
  -9   1  -5  460.58   10.69
  -9  -1  -5  405.53    9.14
  -9  -1  -5  419.47    9.35
  -9   1  -5  446.37   10.69
  -9   1  -5  428.58    9.26
  -9  -1  -5  396.54    9.91
  -9   1  -5  406.18    8.90
  -8   4  -3   54.50    4.42
  -8  -4  -3   56.18    4.95
  -8   4  -3   46.16    5.00
  -8   4  -3   50.85    4.48
  -8   4  -3   49.30    4.14
  -8   4  -3   49.70    5.02
   8   4   3   52.22    4.82
   7   4 -10  175.91    5.48
  -7  -4  10  196.21    7.35
  -7   4  10  189.30    7.47
  -7   4  10  180.46    7.07
   7   4 -10  188.45    6.85
   7   4 -10  181.66    5.31
  -7   4  10  179.26    6.61
  -9   1  12  339.28   10.27
  -9  -1  12  364.60    9.28
  -9   1  12  352.27   10.21
   8   3 -11 1211.98   16.57
  -8   3  11 1140.82   14.49
  -8   3  11 1077.70   12.74
  -8   3  11 1131.37   16.80
  -8   3  11 1177.39   14.48
  -8  -3  11 1271.48   17.16
 -10   4   4  390.12    9.97
 -10   4   4  376.16    7.61
 -10  -4   4  414.07   10.11
 -10   4   4  391.52    9.66
 -10  -4   4  422.58    9.22
 -10   4   4  362.81    7.23
   2   3 -12  374.67    9.61
  -2  -3  12  327.80    7.41
  -2   3  12  320.79    9.96
   2   3 -12  348.40    9.22
  -2   3  12  355.35    8.01
  -5   6  -1    1.19    4.75
   5   6   1    2.85    3.84
  -5   6  -1    1.03    2.56
  -5   6  -1    2.18    3.76
  -5  -6  -1    1.60    2.83
   9   4   1    8.17    4.10
  -9   4  -1    2.63    3.12
  -9   4  -1    4.20    4.00
  -9   4  -1    3.43    3.93
  -9  -4  -1    2.31    3.72
   4   2 -13 3125.10   26.56
  -4   2  13 3089.72   26.67
  -4   2  13 3090.11   23.14
  -4  -2  13 3119.81   26.04
  -4   5  -6  324.48    6.46
  -4   5  -6  331.06    9.11
   4   5   6  338.80    8.11
   4   5   6  344.62    8.84
  -4  -5  -6  359.13    8.53
   4   5   6  320.61    9.48
  -4   5  -6  319.75    7.89
  -4   5  -6  312.35    6.65
  -7  -5  -2  266.96    7.96
  -7   5  -2  238.81    6.20
  -7   5  -2  259.39    8.29
   7   5   2  268.31    8.53
   9   4  -8  320.09    8.94
  -9   4   8  329.04    8.43
  -9   4   8  326.71   10.50
  -9   4   8  303.10    7.05
  -9  -4   8  348.45    8.27
 -11   3   6  610.15   11.35
 -11   3   6  617.04   12.02
 -11   3   6  600.92   11.45
 -11   3   6  600.58   10.49
 -11  -3   6  585.67   11.01
 -12   1   2   25.01    4.05
 -12  -1   2   26.40    3.58
 -12   1   2   27.87    4.63
 -12  -1   2   28.29    3.56
 -12  -1   2   27.75    3.44
 -12  -1   2   29.24    3.28
 -12   1   2   24.82    3.53
  -1   3 -11  102.27    4.23
   1   3  11  104.25    6.40
  -1   3 -11  103.80    5.24
   1   3  11  106.53    5.52
  -1   3 -11   99.74    4.98
  -1  -3 -11  106.57    5.29
  -1   3 -11  106.37    5.61
  -4  -4  11  582.12    9.75
   4   4 -11  577.03   11.92
  -4   4  11  602.89   12.57
  -4   4  11  556.89    9.22
   4   4 -11  604.11   11.55
 -10  -4   3  482.33   10.95
 -10   4   3  502.76   10.67
 -10  -4   3  485.26    9.45
   3   4 -11  793.52   13.60
   3   4 -11  818.64   13.38
  -3   4  11  746.86   14.39
  -3   4  11  762.68   10.36
  -3  -4  11  774.83   10.14
   5   5   5   73.65    5.10
  -5   5  -5   78.67    5.74
  -5  -5  -5   88.01    5.12
  -5   5  -5   87.61    4.46
   5   5   5   71.87    6.06
  -5   5  -5   64.25    5.15
  -5   5  -5   71.25    4.95
   5   6  -5 2427.25   22.58
   5   6  -5 2478.54   18.11
  -5   6   5 2402.67   23.26
  -5   6   5 2459.23   20.77
  -5   6   5 2371.72   20.03
  -5   4  -7 1167.48   15.99
   5   4   7 1225.69   17.23
  -5   4  -7 1179.58   14.57
   5   4   7 1121.92   12.45
  -5  -4  -7 1188.24   15.68
  -5   4  -7 1185.59   17.17
   5   4   7 1239.10   15.24
  -5   2  13 1095.44   13.16
  -5   2  13 1034.82   12.89
   5   2 -13 1076.74   15.94
  -5   2  13 1135.23   15.35
  -5  -2  13 1144.40   15.57
   0   6   6 3645.84   26.85
   0   6   6 3623.01   25.42
   0   6   6 3853.54   26.69
   0   6   6 3712.63   27.77
   0   6  -6 3807.37   27.67
   0   6  -6 3716.06   28.77
   0   6  -6 3712.45   26.38
 -12   0   8 9331.09   46.32
 -12   0   8 8920.58   43.38
   3   6   4   64.60    4.14
   3   6   4   44.76    5.07
  -3   6  -4   54.03    4.45
  -3   6  -4   58.99    4.85
  -3   6  -4   55.44    4.17
  -3   6  -4   48.73    4.32
   3   6   4   49.48    5.26
 -10   4   5 1441.25   18.02
 -10  -4   5 1603.19   18.89
 -10   4   5 1611.52   18.67
 -10   4   5 1449.91   14.92
 -10   4   5 1493.39   14.47
 -10  -4   5 1519.62   17.06
   6   3 -12 1008.49   13.71
  -6   3  12  894.98   10.75
  -6   3  12  865.62   12.81
   6   3 -12  988.18   15.18
  -6  -3  12 1046.18   15.03
  -6   3  12  900.46   14.17
  -6   3  12  943.42   13.00
  -1   5   9 3597.13   30.21
   1   5  -9 3696.62   27.74
   1   5  -9 3510.19   21.79
   1   5  -9 3773.17   28.18
  -1   5   9 3664.41   25.60
   1   5  -9 3750.00   28.81
  10   3  -9 3806.71   26.60
 -10   3   9 3714.62   31.06
 -10  -3   9 4032.38   29.69
 -10   3   9 3592.08   24.23
 -10   3   9 3863.46   27.64
 -10   3   9 3835.39   27.18
 -10  -3   9 3905.79   24.87
  -4   6   6   92.93    5.34
   4   6  -6   98.26    5.62
  -4   6   6   90.89    4.78
   4   6  -6   98.77    5.02
  -4   6   6   97.66    5.64
  -4   6   6   82.81    5.89
  -1  -1  13  563.65   10.36
   1   1 -13  506.21    8.34
   1   1 -13  522.42    9.41
  -1   1  13  539.64   10.73
  -1   1  13  553.77   12.17
   1  -1 -13  540.86   10.60
  -3  -2  13  197.04    6.82
   3   2 -13  204.25    7.35
   3  -2 -13  204.23    7.32
  -3   2  13  185.13    6.30
  -3   2  13  210.39    8.05
  -6   4  -6 3030.20   26.38
  -6  -4  -6 2782.91   18.99
   6   4   6 2775.89   20.55
   6   4   6 2934.90   26.61
  -6   4  -6 2876.49   23.53
  -6   4  -6 2763.80   23.44
  -6  -4  -6 3038.40   24.77
   6   4   6 2878.88   24.01
 -11   1  10 2851.99   20.52
 -11   1  10 3077.71   25.93
 -11   1  10 2976.00   26.12
 -11  -1  10 3047.48   24.19
 -11  -1  10 2984.19   23.11
 -11  -1  10 2887.79   20.94
 -11  -1  10 2831.01   20.27
   8   5  -6  545.05   11.31
  -8  -5   6  547.99   11.23
  -8  -5   6  523.44   10.77
  -8   5   6  502.57    9.51
  -8   5   6  526.43   11.96
  -8   5   6  494.77    9.85
 -11   2   9 2019.06   19.77
 -11   2   9 2060.33   21.31
 -11   2   9 1924.81   17.89
 -11  -2   9 1892.30   17.62
 -11  -2   9 2014.40   19.40
 -11   2   9 1831.93   20.52
  -3   5  -7 5493.43   29.30
   3   5   7 5405.80   29.69
   3   5   7 5701.91   32.36
   3   5   7 5473.55   34.60
  -3   5  -7 5468.20   28.84
  -3   5  -7 5721.88   37.29
  -3   5  -7 5459.53   34.67
   5   5  -9  121.68    5.21
   5   5  -9  143.05    5.80
  -5   5   9  158.53    6.36
  -5   5   9  108.74    4.85
  -5   5   9  129.82    6.30
   5   5  -9  114.88    4.88
  -5   5   9  124.60    6.95
  -5  -5   9  132.10    5.06
  -4   2 -10 2906.20   24.02
  -4   2 -10 2897.55   23.29
   8   2   6  909.35   11.71
  -8   2  -6  909.11   14.21
  -8   2  -6  830.47   10.63
  -8   2  -6  848.08   14.31
  -8   2  -6  909.25   13.60
  -8  -2  -6  836.34   12.58
  -8  -2  -6  895.16   12.95
 -11  -3   2    1.80    3.19
 -11   3   2    1.30    3.54
 -11   3   2   16.21    3.54
 -11  -3   2   11.55    2.92
 -11   3   2    0.43    3.66
   2   6   5 1497.86   18.34
   2   6   5 1506.57   17.85
  -2   6  -5 1460.99   16.03
  -2   6  -5 1454.78   16.21
   2   6   5 1502.06   15.12
  -2   6  -5 1467.11   17.63
  -2   6  -5 1518.61   16.55
  -4   4  -8 4775.32   27.81
   4   4   8 4782.04   31.57
   4   4   8 4910.23   30.73
  -4   4  -8 4968.64   34.62
  -4   4  -8 4966.99   32.04
  -4   6  -3 1666.23   16.31
  -4  -6  -3 1699.79   15.12
   4   6   3 1667.09   19.71
  -4   6  -3 1688.41   17.23
  -5  -4  11  418.23    8.99
   5   4 -11  439.58    9.55
   5   4 -11  443.64   10.12
  -5   4  11  394.37    8.20
  -5   4  11  463.18   11.19
   8   3   5   86.84    4.96
  -8   3  -5   89.75    5.57
  -8   3  -5  101.79    5.87
  -8  -3  -5   84.45    4.94
  -8   3  -5  112.89    5.86
  -8  -3  -5  100.44    5.00
  -8   3  -5  107.55    4.52
  -6  -6   2   46.87    3.84
   6   6  -2   49.12    4.13
  -6   6   2   42.87    3.42
  -6   6   2   41.71    5.23
  -6   6   2   39.61    4.89
   2   4 -11  379.08    9.71
   2   4 -11  372.59    9.32
  -2   4  11  371.84   10.24
  -2   4  11  345.54    6.43
  -2   4  11  358.92    6.67
 -12   0   1    0.36    3.74
 -12   0   1    1.40    2.54
 -12   0   1   -0.23    2.44
 -12   0   1    4.14    3.44
   8   5   0  273.07    7.64
  -8  -5   0  271.56    6.23
   8   5   0  255.97    6.14
   6   6  -3  954.18   13.63
  -6  -6   3  957.58   12.11
  -6   6   3  911.00   13.02
  -6   6   3  969.72   14.57
  -6   6   3  915.79   10.89
  -1   4 -10  207.42    6.50
   1   4  10  223.61    7.58
  -1   4 -10  212.33    7.62
   1   4  10  201.80    6.33
  -1  -4 -10  201.22    5.83
  -1   4 -10  225.25    7.48
 -10   4   2    1.39    3.52
 -10   4   2    3.51    2.62
 -10  -4   2   -0.26    3.74
 -10  -4   2    2.73    2.77
  -8   0  13    0.35    3.09
   3   3  10 1013.19   13.48
  -3   3 -10 1005.09   14.19
  -3   3 -10  969.19   12.97
   3   3  10  967.14   13.70
  -3  -3 -10  968.95   11.74
  -3   3 -10 1021.96   12.67
  -6   2  13 1873.38   15.86
  -6   2  13 1884.90   17.84
  -6   2  13 1886.90   18.81
 -12  -2   5    1.87    2.52
 -12  -2   5    4.64    3.23
 -12   2   5    2.17    3.87
 -12   2   5    1.70    2.93
 -12   2   5    1.17    3.80
  -6  -5  -4   41.40    4.08
   6   5   4   40.25    4.08
  -6   5  -4   40.82    4.11
  -6   5  -4   50.14    4.21
  -6   5  -4   47.00    4.83
  -6   0  -9    0.64    2.87
  -6   0  -9    1.44    3.25
 -10  -4   6   68.07    5.46
 -10   4   6   67.85    4.43
 -10   4   6   68.88    4.99
 -10   4   6   66.93    5.75
 -12   2   4  721.71   11.54
 -12  -2   4  801.66   11.93
 -12   2   4  722.39   12.64
 -12   2   4  777.53   12.52
 -12  -2   4  697.54    9.60
  -7   0  -8  165.02    6.41
  -7   0  -8  160.13    5.81
 -12  -1   8 4289.12   27.92
 -12   1   8 4335.42   28.55
 -12  -1   8 4385.32   27.92
 -12   1   8 4179.38   25.98
 -12   1   8 4211.16   30.38
  -6   6   1  359.27    9.23
  -6  -6   1  352.84    7.73
   6   6  -1  368.29    7.62
   6   6  -1  382.16    7.91
 -11  -3   7 4345.90   27.90
 -11   3   7 4183.30   28.50
 -11   3   7 4180.73   27.46
 -11   3   7 4284.32   29.02
 -11   3   7 4118.63   29.41
 -11  -3   7 4354.06   29.55
 -11   0  -2 1213.77   15.27
 -11   0  -2 1234.22   15.64
 -10  -2  -3   61.53    4.72
 -10   2  -3   58.79    4.44
 -10  -2  -3   55.41    3.44
 -10   2  -3   60.19    4.49
  10   2   3   48.55    3.32
 -10   2  -3   60.77    4.73
 -10   2  -3   56.87    5.21
 -10  -2  -3   60.37    4.94
  -2   0 -12 3948.89   27.38
   2   0  12 4070.15   25.62
 -10   0  -4  158.60    6.41
 -10   0  -4  159.59    6.18
 -10   0  -4  148.15    6.53
   7   4   5  109.86    5.56
  -7   4  -5  113.60    5.59
  -7   4  -5  109.89    5.69
  -7   4  -5  102.90    5.67
  -7  -4  -5  114.50    5.78
   7   4   5  118.66    6.66
   1   3 -12  155.92    6.45
   1  -3 -12  146.04    6.19
  -1   3  12  155.10    5.72
   1   3 -12  145.94    6.47
  -1   3  12  146.25    7.03
  -6   6   4 2259.79   17.52
   6   6  -4 2240.11   20.75
  -6   6   4 2250.60   18.78
  -6   6   4 2141.24   16.26
  -6  -6   4 2370.28   18.28
  -6   6   4 2377.38   22.11
  -2   2  13  144.64    5.87
   2  -2 -13  129.92    6.00
  -2   2  13  146.92    7.00
  -2  -2  13  141.83    5.62
   2   2 -13  139.22    5.82
  -7   5   8 1250.72   14.76
  -7  -5   8 1315.23   14.38
   7   5  -8 1317.34   15.48
  -7   5   8 1248.56   16.33
  -7   5   8 1205.68   15.82
  -7  -5   8 1339.49   15.56
 -12  -2   6  469.20    8.21
 -12   2   6  486.07   10.27
 -12  -2   6  493.45    9.68
 -12   2   6  469.99   10.17
  -1   2 -12  129.00    4.85
  -1   2 -12  134.25    5.35
   1   2  12  149.33    6.78
   1   2  12  162.20    6.30
  -1   2 -12  146.79    5.15
  -1  -2 -12  141.29    5.82
 -12  -2   3 1389.60   14.83
 -12   2   3 1386.00   16.77
 -12   2   3 1434.57   15.99
 -12   1   1  337.57    8.88
 -12  -1   1  335.17    7.36
 -12   1   1  321.46    6.79
 -12   1   1  333.07    8.56
 -12  -1   1  350.14    7.87
 -12  -1   1  331.55    7.30
   1   6   6  437.82    9.60
  -1   6  -6  460.16    9.20
   1   6   6  455.75    8.97
   1   6   6  474.99    9.96
  -1   6  -6  465.65    9.05
  -1   6  -6  451.97    8.96
  -1   6  -6  471.61   10.20
  -5  -6  -2  632.45    9.47
  -5   6  -2  620.57   10.86
  -5   0 -10  283.60    7.36
  -8   1  13 2495.76   23.88
  -8  -1  13 2380.58   21.05
  -8  -1  13 2447.75   23.12
  -8   1  13 2292.74   22.35
  -8   1  13 2181.50   16.65
   0   0  13   -0.96    3.10
   0   0 -13    1.33    3.28
   0   5  -9 1430.61   16.98
   0   5   9 1412.59   14.80
   0   5  -9 1425.13   16.30
   0   5  -9 1413.40   16.71
  -3   4  -9  164.83    6.79
   3   4   9  167.34    5.82
  -3   4  -9  158.11    6.26
   3   4   9  147.15    5.49
   2   5   8   92.08    4.94
   2   5   8   91.24    4.13
  -2   5  -8   89.01    4.09
  -2   5  -8   94.35    5.53
  -2   5  -8   98.52    6.18
   2   5   8   91.21    4.61
  -2   5  -8   97.41    4.71
 -11   2  -1    7.41    3.55
 -11  -2  -1    5.94    3.31
 -11  -2  -1    6.39    3.01
 -11   2  -1    6.43    3.88
 -11   2  -1    7.40    3.24
  -8   0  -7   -0.39    3.54
  -8   0  -7    1.64    2.47
  -8   0  -7   -0.48    2.70
  -8   0  -7    2.87    4.01
  -6   4  11 1826.48   20.03
   6   4 -11 1810.85   16.73
   6   4 -11 1682.68   17.85
  -6   4  11 1584.05   16.04
  -6  -4  11 1899.83   18.21
  -6   4  11 1678.56   15.83
   7   3 -12  734.86    9.89
  -7   3  12  756.61   12.20
  -7   3  12  741.39    9.77
  -7  -3  12  806.04   13.06
  -7   3  12  781.52   11.15
   7   3 -12  836.55   13.09
  -7   3  12  750.99   11.13
  -5   6   6  237.91    8.03
  -5   6   6  239.71    6.73
   5   6  -6  242.00    7.64
  -5   6   6  264.26    7.35
   5   6  -6  260.74    6.04
  -6   1  -9    7.27    3.21
  -6   1  -9    8.42    3.34
   6   1   9    7.85    2.39
  -6  -1  -9    6.33    2.56
  -6  -1  -9    8.07    3.01
  -2   6   7  179.69    6.79
   2   6  -7  170.05    5.94
  -2   6   7  186.36    6.77
  -2   6   7  175.70    5.49
   2   6  -7  168.36    6.45
  -7  -1  -8  128.64    4.66
  -7   1  -8  133.44    5.52
  -7   1  -8  146.02    6.93
  -7  -1  -8  138.04    5.39
  -7   1  -8  149.43    6.34
  -7  -1  -8  125.95    4.45
 -11  -3   1 2414.77   19.98
 -11   3   1 2373.54   20.57
 -11  -3   1 2229.30   17.22
 -11   3   1 2275.22   21.66
 -11   3   1 2293.17   19.28
   1  -4 -11  725.05   10.98
   1   4 -11  674.29   10.00
   1   4 -11  767.15   12.63
  -1   4  11  708.23    9.43
  -1   4  11  751.72   13.13
   1   4 -11  741.44   12.19
 -10  -4   1    3.61    3.75
 -10  -4   1   -0.17    2.33
 -10   4   1    0.36    3.56
 -10   2  11  281.15    8.05
 -10   2  11  284.47    8.87
 -10  -2  11  293.40    8.01
 -10   2  11  300.11    7.40
  -6  -6   0  113.43    4.84
   6   6   0   99.62    5.11
 -11   1  -2 1099.01   14.49
 -11  -1  -2 1143.84   12.82
 -11  -1  -2 1081.62   14.08
 -11   1  -2 1126.97   13.96
 -11  -1  -2 1107.39   14.21
   3   6  -7   12.47    3.69
  -3   6   7    5.88    4.35
   3   6  -7   12.28    3.60
  -3   6   7   12.12    4.18
  -3   6   7   12.44    3.97
   6   5  -9   42.60    3.81
  -6   5   9   39.86    4.69
  -6   5   9   40.34    3.83
  -6  -5   9   34.38    3.66
  -6   5   9   43.53    4.12
 -12   0   9    0.43    3.61
 -12   0   9    2.21    2.77
   8   5  -7  452.65    9.68
  -8   5   7  404.17    8.69
  -8   5   7  419.03    8.63
  -8  -5   7  432.47    9.01
  -8  -5   7  463.32    9.66
  -8   5   7  434.19   10.40
  -2  -1 -12   99.23    5.11
   2   1  12  113.04    5.32
 -10  -1  -4 4422.36   27.94
 -10   1  -4 4174.11   27.09
 -10   1  -4 4469.36   25.76
 -10  -1  -4 4548.46   29.64
 -10  -1  -4 4314.65   25.58
 -10   1  -4 4448.35   29.67
 -10   1  -4 4336.99   29.05
 -10   0  12  503.72   10.60
 -10   0  12  494.08   10.51
 -12  -2   7  804.12   10.42
 -12  -2   7  818.70   12.01
 -12   2   7  811.55   12.41
 -12   2   7  817.43   13.04
  -8   4  10 1168.22   16.21
  -8   4  10 1164.00   14.21
   3   2  11  154.42    6.20
  -3   2 -11  159.92    5.72
   3   2  11  171.47    5.95
  -3  -2 -11  164.13    5.71
  -7   2  13 1902.85   19.61
  -7  -2  13 1691.44   17.14
   7   2 -13 2003.16   20.04
  -7   2  13 1862.41   18.82
  -7  -2  13 2039.63   19.87
   7   2 -13 1680.87   16.07
   9   2   5    1.45    2.16
  -9   2  -5    3.27    3.26
  -9  -2  -5    0.93    3.22
  -9   2  -5   -0.12    3.96
  -9   2  -5   -0.60    2.69
  -9   2  -5    2.40    3.69
  -9  -2  -5    0.07    3.05
 -10   4   7  126.84    5.33
 -10   4   7  103.96    6.22
 -10  -4   7  107.90    5.02
  10   4  -7  117.36    6.33
 -10   4   7  112.98    5.28
  -1   6   7  451.19    9.62
  -1   6   7  425.26    9.06
  -1   6   7  438.30    8.32
   1   6  -7  458.46    8.87
   1   6  -7  481.17    9.61
  -1   6   7  454.69    9.53
  10   3   2 1479.12   14.52
 -10   3  -2 1489.74   16.04
 -10  -3  -2 1499.34   15.82
 -10   3  -2 1520.46   16.46
  -5   0  14   63.81    4.64
   5   0 -14   61.67    3.82
  -4   0  14 2062.83   19.48
  -9   2  12 2120.27   20.34
  -9   2  12 1951.77   15.97
  -9   2  12 1995.07   20.83
  -9  -2  12 2098.51   19.93
  -9   4  -2 3100.55   22.89
  -9  -4  -2 3077.33   23.68
  -6   6   5 1391.27   13.51
  -6   6   5 1300.35   12.99
  -6   6   5 1303.43   13.36
  -6   6   5 1396.93   16.45
   6   6  -5 1451.04   16.36
  -9   4   9    9.30    3.54
   9   4  -9   11.64    3.43
  -9   4   9   14.97    4.79
  -9  -4   9   15.86    2.91
  -9  -4   9    9.70    4.11
  -5  -1 -10 1877.43   16.86
   5   1  10 1878.69   16.00
  -5   1 -10 1926.54   17.15
  -8  -5  -1   89.25    5.30
   8   5   1   83.71    5.12
  -7   5  -3  377.88    8.90
   7   5   3  369.93    8.27
  -7  -5  -3  362.32    8.47
   7   5   3  386.31    9.64
   0  -1  13  422.67    8.04
   0   1  13  425.34    8.90
   0   1  13  424.83   10.30
   0   1 -13  383.14    7.62
   0  -1 -13  394.83    8.62
   0   7   0    2.69    3.50
   0   7   0    2.11    3.27
 -11   0  11    2.21    3.51
 -11   0  11    2.96    3.44
 -12   2   2  576.90    9.53
 -12  -2   2  566.61    9.18
 -12   2   2  580.30   11.05
 -12  -2   2  559.72    8.52
  -8   1  -7  638.12   11.64
  -8  -1  -7  617.09   10.34
  -8   1  -7  627.77   10.30
  -8  -1  -7  629.19    9.45
   9   3   4 1244.00   13.66
  -9  -3  -4 1272.72   13.98
  -9  -3  -4 1243.57   14.58
  -9   3  -4 1234.39   14.79
  -9   3  -4 1226.11   14.73
  -9   3  -4 1182.50   14.38
  -9   3  -4 1218.26   13.26
 -11  -3   8 4042.18   25.80
 -11   3   8 4230.83   26.72
 -11   3   8 4161.68   26.44
 -11   3   8 4140.27   29.25
 -11   3   8 3997.99   26.29
  -4   6   7  190.59    6.53
   4   6  -7  205.53    6.07
  -4   6   7  203.93    7.05
  -4   6   7  196.58    7.14
   4   6  -7  197.85    6.44
 -12   0   0   41.96    4.12
 -12   0   0   35.79    3.96
 -12   0   0   32.64    3.11
  -9   3  11 1042.05   12.69
   9   3 -11  979.67   13.10
  -9   3  11 1026.42   15.01
  -9  -3  11 1052.51   14.72
  -9   3  11  979.42   12.15
   0   7  -1  833.63   12.05
   0   7   1  863.77   12.29
   0   7  -1  829.38   10.62
   0   7   1  881.72   12.38
  -9  -5   3  125.31    5.18
   9   5  -3  134.54    5.78
  -9  -5   4 1689.74   18.02
   9   5  -4 1702.69   17.65
  -1   7   0   28.05    3.74
   1   7   0   21.76    3.54
   1   7   0   21.31    3.73
  -1   7   0   22.71    4.03
   1   7  -1  102.81    4.52
  -1   7   1  102.81    5.67
   1   7  -1  107.39    4.94
   1   7  -1  101.17    5.19
  -1   7   1  113.66    5.43
   6   0 -14  130.79    5.10
  -6   0  14  126.55    5.58
   1  -2 -13   -0.34    3.07
  -1   2  13    1.43    3.89
  -1   2  13    1.75    3.18
   1   2 -13    2.24    2.73
  -3   0  14  126.68    5.50
  -3   0  14  117.18    5.23
   3   0 -14  120.46    4.58
 -12   1   9 3720.15   23.84
 -12  -1   9 3783.16   24.48
  -8   4  -4  260.22    6.97
   8   4   4  283.53    8.36
  -8   4  -4  269.48    7.39
  -8  -4  -4  271.64    7.47
  -4   0 -11    7.24    3.46
  -3   6  -5   63.56    4.49
   3   6   5   74.13    5.03
  -3   6  -5   80.64    3.98
  -3   6  -5   56.47    4.17
   3   6   5   78.14    5.12
  -3   6  -5   72.66    4.69
 -11  -2  10   86.00    4.81
 -11   2  10   79.38    4.85
 -11   2  10   82.47    5.31
 -11   2  10   81.53    5.05
   2   3  11 1384.79   15.83
  -2   3 -11 1332.65   13.86
   2   3  11 1375.49   14.81
  -2  -3 -11 1327.14   13.45
  -2   3 -11 1291.07   13.88
   4   6   4  212.85    7.13
  -4   6  -4  219.23    6.62
  -4   6  -4  176.68    5.62
   4   6   4  191.04    7.09
  -4   6  -4  196.93    6.25
 -10   3  10 1796.75   16.81
 -10   3  10 1859.86   17.52
 -10  -1  12    9.18    3.34
 -10  -1  12    6.84    2.88
 -10   1  12    5.76    3.90
 -10  -1  12    7.76    3.55
 -10   1  12    5.81    3.95
   5   1 -14 1267.67   14.33
   5  -1 -14 1222.06   13.09
  -4   1  14  373.28    8.10
   4   1 -14  355.38    7.49
  -4   1  14  364.76    8.03
  -9   0  -6 2026.15   16.96
  -9   0  -6 2097.51   19.67
  -3   5  10 3594.26   28.53
  -3   5  10 3301.31   21.79
   3   5 -10 3212.63   23.14
   3   5 -10 3521.17   25.19
   0  -3 -12  496.05    8.99
   0   3  12  478.26    8.75
   0   3 -12  459.43    8.68
   0   3  12  514.52   10.66
   0   3 -12  481.93    9.00
   1   7   1  255.21    6.82
   1   7   1  227.39    7.00
  -1   7  -1  229.41    5.85
  -1   7  -1  236.76    6.85
  -1   7  -1  238.28    6.57
  -9  -5   2  528.92    8.61
   9   5  -2  531.19    9.29
  -9   0  13    3.01    3.80
  -9   0  13   11.18    3.99
  -9  -5   5  488.66    9.37
  -9   5   5  468.83   10.31
   9   5  -5  463.11    9.90
   0   6   7 1865.38   17.49
   0   6  -7 1785.61   16.13
   0   6   7 1746.83   15.71
   0   6  -7 1846.90   17.56
   0   6   7 1847.65   16.64
  -6  -6  -1   24.65    3.08
   6   6   1   26.43    3.84
  -6   3  -8  219.47    7.35
   6   3   8  205.90    6.11
   4   5 -10  466.59    9.04
  -4   5  10  426.66    8.08
  -4   5  10  466.47   10.34
   4   5 -10  428.68    8.44
   1   7  -2   78.90    4.60
   1   7  -2   70.92    4.08
  -1   7   2   71.93    4.96
   1   7  -2   67.27    4.29
  -1   7   2   74.93    4.74
 -11   1  11    0.12    3.51
 -11  -1  11    2.30    2.99
 -11  -1  11    1.85    2.96
 -11   1  11    0.34    3.53
  -7   4  11  101.80    4.84
  -7  -4  11  105.20    5.06
   7   4 -11  101.57    5.03
  -7   4  11  100.73    4.74
  -7   4  11   96.20    5.07
  -2   4 -10   14.58    3.38
  -2   4 -10   12.88    3.47
   2   4  10   15.58    3.08
   0   7   2  899.05   12.11
   0   7  -2  878.38   11.96
   0   7   2  746.44   11.70
   0   7  -2  750.22   10.49
   0   7  -2  780.28   10.66
 -10  -4   0  218.51    6.64
  -2   7   1   63.33    5.01
   2   7  -1   70.73    4.30
  -2   7   1   62.80    4.32
   2   7  -1   68.39    4.03
 -12   1   0    4.20    3.53
 -12  -1   0    3.26    2.59
 -12  -1   0    4.14    2.93
 -12   1   0    5.28    3.39
  -2   6  -6   72.76    4.45
  -2   6  -6   68.68    4.27
  -2   6  -6   78.23    4.18
   2   6   6   66.98    4.78
   2   6   6   77.85    4.89
  -2   6  -6   87.51    5.05
 -12  -2   8 4138.32   25.46
 -12   2   8 4102.65   27.56
  -1   5  -9  933.70   13.07
  -1   5  -9  894.20   12.56
  -1   5  -9  918.88   11.78
   0   4 -11  825.16   11.62
   0   4 -11  791.18   11.89
   0  -4 -11  823.39   10.23
   0   4  11  823.36   12.76
   0   4  11  811.75    9.98
  -2   5  10  252.16    6.09
   2   5 -10  244.79    6.90
   5   5   6  187.65    5.75
   5   5   6  204.01    7.24
   5   5   6  174.50    5.57
  -5   5  -6  184.04    6.38
  -5   5  -6  193.38    6.47
 -11   3   0  115.73    5.22
 -11  -3   0  103.88    4.14
 -11  -3   0  115.87    4.68
 -11   3   0  101.61    5.32
   2   7   0  206.09    5.80
   2   7   0  194.60    6.10
  -2   7   0  193.66    6.35
  -2   7   0  188.50    5.96
   5   6   3  147.36    6.01
  -5   6  -3  164.08    5.87
   5   6   3  161.23    6.39
  -5   6  -3  143.44    5.36
   6   1 -14  439.86    8.90
  -6   1  14  455.00    8.22
   5   3   9 1670.92   15.55
  -5   3  -9 1695.84   17.60
  -3  -1  14  241.89    6.89
  -3   1  14  225.75    6.76
  -3   1  14  236.71    6.78
  -7   3  -7  500.84    9.36
  -7   3  -7  493.03   10.18
  -4  -1 -11   64.42    4.10
  -4   1 -11   69.29    4.31
   4   1  11   62.58    3.73
  -4   5  -7   29.27    4.06
  -4   5  -7   30.07    4.06
   4   5   7   31.62    4.07
   4   5   7   28.96    3.20
 -13   0   5    1.86    3.00
 -13   0   5   -0.75    3.02
   8   3 -12  111.91    5.45
  -8   3  12  117.28    5.53
   6   6  -6 1157.96   15.06
  -6   6   6 1190.78   14.62
  -6   6   6 1157.74   12.31
   2   7  -2  106.67    4.56
   2   7  -2  112.23    4.50
  -2   7   2  105.28    5.33
   7   6  -3  482.74    8.72
 -10   4   8  145.18    5.47
 -10  -4   8  149.76    6.14
  10   4  -8  146.81    5.78
 -10  -4   8  142.21    4.95
 -10   4   8  155.79    6.67
  -5   6   7   24.46    3.86
  -5   6   7   27.71    3.63
  -5   6   7   29.53    4.31
   5   6  -7   21.86    3.70
   7   0 -14 3198.32   22.10
  -7   0  14 3157.77   23.69
  -9  -1  -6 1810.65   15.91
  -9   1  -6 1881.94   18.60
  -9   1  -6 1920.83   18.59
  -9  -1  -6 1831.97   17.29
  -9   1  -6 1797.38   15.77
   2   0 -14  363.62    7.10
  -2   0  14  359.55    8.12
  -7  -6   2  465.09    8.71
 -13   0   6 1368.19   14.87
 -13   0   6 1378.11   14.71
  -7   5   9   16.02    3.28
   7   5  -9   21.39    3.09
  -7   5   9   19.42    3.81
  -7   5   9   15.27    3.43
 -13   0   4  768.81   10.99
 -13   0   4  781.51   10.99
 -12  -2   1  912.36   11.27
 -12   2   1  880.56   12.18
 -12   2   1  887.62   12.49
  -9  -1  13    9.62    3.06
  -9  -1  13    8.50    3.52
  -9   1  13    9.11    3.69
  -9   1  13    6.69    3.91
   5   5 -10    9.22    2.88
  -5   5  10    8.65    2.93
  -5   5  10    9.14    3.69
   1   7   2  719.04   10.96
  -1   7  -2  826.32   11.22
  -1   7  -2  746.51   10.00
  -1   7  -2  734.26   10.34
   1   7   2  827.05   10.66
  -8   2  13   34.28    4.04
  -8  -2  13   33.21    4.20
  -8   2  13   35.99    4.39
   8   2 -13   43.63    4.43
  -8   5   8    1.11    2.64
  -8   5   8    1.76    3.12
  -8   5   8    5.28    3.89
  -8  -5   8    7.30    3.28
   8   5  -8    3.41    3.03
  -8  -5   8    0.95    2.34
   4   3 -13   10.95    3.67
  -4   3  13   10.25    3.51
   4   3 -13    9.44    3.79
  -9  -5   1  221.63    6.64
  -6   5  -5  514.66    9.55
  -6   5  -5  472.12    8.76
   6   5   5  527.59    9.04
   6   5   5  510.95    8.73
  -6  -5  -5  563.00    9.37
   6   5   5  526.08   10.47
  -9  -5   6  526.10    9.08
  -9  -5   6  530.98    9.62
  -9   5   6  530.62   10.28
  -2   7  -1   28.68    3.33
   2   7   1   34.73    3.84
  -2   7  -1   31.48    3.22
  -2   7  -1   32.65    4.11
   7   6  -4   84.17    4.65
  -7   6   4   80.89    4.71
   1   0  13   11.81    2.70
  -1   0 -13    0.03    2.86
   6   2   9  247.51    5.85
  -6   2  -9  242.61    6.74
 -11   0  -3   -0.38    3.06
 -11   0  -3    0.88    2.81
 -11   0  -3   -0.86    3.42
   5   3 -13 1202.50   14.59
  -5  -3  13 1209.87   13.71
  -5   3  13 1203.42   14.13
   5   3 -13 1157.47   13.57
 -12   0  10  402.64    8.53
  -7   2  -8  765.22   11.70
  -7   2  -8  760.59   11.19
   1   7  -3 1090.40   12.73
  -1   7   3 1112.26   13.38
 -11   2  -2  393.55    8.48
 -11   2  -2  390.28    8.22
 -11  -2  -2  390.29    7.82
 -11  -2  -2  375.92    8.31
  -3   3  13   92.63    5.11
   3  -3 -13   86.10    4.95
   3   3 -13   86.79    5.01
   3   3 -13   81.47    4.82
   6   4   7 2153.66   19.37
  -6   4  -7 2173.42   17.29
  -6   4  -7 2186.77   19.60
   2   2  12  846.24   12.07
  -2  -2 -12  815.16   10.46
   5   4   8  914.15   12.31
  -5   4  -8  853.13   11.05
   5   4   8  832.60   11.08
  -5   4  -8  927.02   12.72
   1   5 -10   73.76    4.54
   1   5 -10   75.10    4.46
  -3   5  -8  447.91    9.18
  -3   5  -8  471.07    9.84
 -10   2  -4  609.89   10.32
 -10   2  -4  594.09    9.14
 -10  -2  -4  572.17    9.74
 -10   2  -4  599.13    9.75
   8   5   2 1259.56   14.37
  -8  -5  -2 1295.51   14.07
   8   5   2 1308.22   13.72
 -11   3   9  103.36    4.99
 -11  -3   9  102.96    4.12
 -11  -3   9   95.94    4.83
 -13  -1   5  141.70    5.18
 -13   1   5  137.30    5.37
 -13   1   5  137.21    5.56
   0   7   3    0.28    3.59
   0   7  -3    2.53    3.09
   0   7  -3    0.50    2.87
   0   7   3    2.92    3.43
   2   7  -3   75.42    4.03
  -2   7   3   73.22    4.66
   2   7  -3   86.91    4.26
  -2   7   3   79.01    4.72
   4   3  10  906.25   11.44
  -4   3 -10  873.50   11.64
 -13   0   7    1.04    2.95
 -13   0   7   -0.49    3.06
  -8   3  -6 1602.86   16.43
   8   3   6 1566.24   14.16
  -3   7   1  124.32    4.97
  -3   7   1  126.38    5.53
 -13   0   3    1.10    2.77
  -4   4  12 1752.32   18.28
   4   4 -12 1752.36   16.40
  -7  -1  14  141.91    5.47
   7   1 -14  153.69    5.70
  -1   6  -7 3133.98   22.67
  -1   6  -7 3131.76   20.59
  -2   1  14  201.26    5.95
  -2  -1  14  199.55    5.79
  -2   1  14  183.27    6.18
 -13   1   6 1909.26   17.83
 -13   1   6 1893.74   17.15
 -13  -1   6 1900.40   16.90
  -3   0 -12 1349.13   13.67
 -13   1   4  138.34    5.49
 -13   1   4  127.03    4.86
  -3   7   2 2462.96   19.04
  -3   7   2 2559.73   18.67
   5   2  10 1671.55   14.40
  -5   2 -10 1557.18   14.85
   0  -2 -13  371.20    7.53
   0   2  13  386.05    8.68
  -3   6   8  662.62   10.63
   3   6  -8  689.29    9.94
  -3   6   8  678.73   10.00
  -3   4  12  823.26   12.52
   3   4 -12  822.96   11.55
  -2   6   8   72.14    5.13
   2   6  -8   80.51    4.47
  -6  -3  13 4441.82   26.42
   6   3 -13 4038.46   26.42
  -3   7   0   96.33    5.26
  -3   7   0  100.08    4.35
   6   6   2  201.59    6.24
  -8   2  -7  270.56    6.63
  -8   2  -7  260.35    7.17
  -8   2  -7  268.23    7.32
 -12   3   5 2340.86   19.22
 -12  -3   5 2233.58   17.33
  -1  -1 -13 1639.15   15.03
   1   1  13 1679.52   15.09
   7   6  -5  785.95   11.15
  -7   6   5  760.25   10.87
 -12   0  -1    0.69    2.86
 -11  -1  -3 1313.93   14.22
 -11   1  -3 1306.44   13.94
 -11  -1  -3 1328.11   13.79
 -12   1  10  537.76    9.66
  -9  -4  -3  250.08    6.40
   9   4   3  243.91    7.08
   9   4   3  236.32    6.15
  -9   4  -3  254.52    6.72
  -5   4  12   85.79    7.25
   5   4 -12   53.01    4.42
 -12  -3   4  102.08    4.23
 -12   3   4  105.23    4.86
  -7   4  -6  111.82    4.53
  -7   4  -6  119.96    5.06
  -7   4  -6  103.61    4.47
   7   4   6  110.40    5.62
   7   4   6  123.07    4.79
  11   4  -4 1364.04   15.12
 -11  -4   4 1378.88   14.72
 -11  -4   4 1394.32   13.46
 -11   4   4 1383.36   14.46
  -9   4  10   66.71    4.18
  -9  -4  10   81.75    4.84
  -9   4  10   72.36    5.11
 -10   0  -5   -0.66    2.95
 -10  -3  -3  609.22    9.22
 -10  -3  -3  615.74    9.78
  11   4  -5  705.03   11.18
 -11  -4   5  696.39   10.66
 -11   4   5  723.02   10.65
   4   4   9    3.10    2.59
  -4   4  -9    4.16    3.19
  -4   4  -9    3.84    3.07
  -2   7  -2  412.36    7.47
   2   7   2  390.26    7.93
  -2   7  -2  393.02    7.32
 -12   2   9  989.43   12.55
   7   5   4  522.61    9.80
  -7  -5  -4  533.15    8.86
  -6   5  10  101.67    5.00
  -6   5  10   92.61    4.14
  -1   7  -3  451.75    7.84
   1   7   3  474.24    8.71
   2   3 -13 3151.99   21.35
   2   3 -13 3357.16   22.99
  -2   3  13 3343.25   24.27
   2  -3 -13 3133.60   21.11
  -4   6   8  968.88   12.56
  -4   6   8  951.14   11.58
 -12  -3   6  324.21    6.98
 -12   3   6  303.92    7.25
 -10   2  12 1735.92   15.93
 -10   2  12 1682.81   17.22
 -13  -1   7  368.33    7.52
 -13   1   7  357.21    7.79
 -11  -4   3   62.70    4.12
  -3   7   3 1279.69   13.16
  -3   7   3 1342.80   13.29
 -10  -4  -1 1533.40   14.48
  10   4   1 1490.10   14.00
  -9  -5   0  751.17   10.60
   9   5  -7    2.28    3.10
  -9  -5   7   -0.21    2.57
  -9  -5   7    2.78    2.96
  -9   5   7    0.67    3.79
  -5  -2  14   34.91    3.53
   5   2 -14   36.75    3.73
  -1   6   8  946.51   11.44
   1   6  -8 1023.77   12.20
   4  -2 -14  289.00    6.69
 -13   1   3  265.46    6.93
  -8   0  14 1135.34   13.58
  -8   0  14 1275.35   14.89
   1   3  12 1513.98   13.82
  -8  -4  11 1587.26   15.22
  -3  -1 -12 8923.01   36.24
  -3   1 -12 9121.51   36.64
  -1   0  14 1766.23   15.31
   2   4 -12  869.32   11.26
  -2   4  12  841.66   12.04
   4   6   5  392.39    7.76
  -4   6  -5  385.89    7.27
   4   6   5  389.11    8.16
   6   6  -7  230.65    6.00
  -6   6   7  211.49    6.16
   1   7  -4   86.86    4.19
  -1   7   4   88.17    4.37
   1   7  -4   93.79    4.50
  -1   7   4   87.83    4.66
  -3   7  -1 1003.30   12.01
 -13   0   8 2129.13   16.95
 -11  -4   6  396.63    7.47
  11   4  -6  407.31    8.58
 -11   2  11  253.94    6.94
 -11  -3  -1  581.20    9.31
 -11   3  -1  579.94    9.30
  -1   4 -11  252.88    6.32
 -12   1  -1   30.94    3.62
 -12  -1  -1   30.51    3.22
 -12   1  -1   30.08    3.45
   2   7  -4  419.74    7.59
  -2   7   4  525.68    8.69
 -12   2   0 1529.32   14.86
 -12   2   0 1438.67   14.60
 -10   1  -5  291.74    7.10
 -10   1  -5  298.95    7.00
 -10   3  11  736.63   11.44
 -10  -3  11  930.73   11.71
  -2   5  -9  102.10    4.79
  -2   5  -9  107.47    4.71
 -10   4   9  630.50    9.28
 -10   4   9  614.34   10.34
   0   5 -10  198.73    5.84
  -6  -2  14 5817.59   29.46
   5   6   4   69.26    4.40
   0   7  -4   88.98    4.12
   3   3  11    9.51    2.61
  -9  -3  -5    7.83    2.74
;

_shelx_hkl_checksum   82474

#==============================================================================
#     End of CIF
#==============================================================================
