# Supplementary material for: Solid State Structure and Hydrogen Bonding of Some Cyclic NH Carboximides
Source: MDPI journal article supplement (doi:10.3390/cryst13010150), 2023-01-15
Supplement: s1 [file s1 › 3.cif]

data_3
_audit_creation_date                               2022-02-10
_audit_creation_method                            'by CrystalStructure 4.3'

_publ_section_references
;
    ENTER OTHER REFERENCES

    Rigaku (2019). CrystalStructure. Version 4.3. 
    Rigaku Corporation, Tokyo, Japan.

    Sheldrick, G. M. (2014). Acta Cryst. (2014). A70, C1437.
    SHELXT Version 2018/2

    Sheldrick, G.M. (2008) SHELXL Version 2018/3, Acta Cryst. A64, 112-122.

    Rigaku (1998). REQAB. 
    Rigaku Corporation, Tokyo, Japan.

;

_chemical_formula_sum                             'C9 H9 N O2'
_chemical_formula_moiety                          'C9 H9 N O2'
_chemical_formula_weight                           163.18
_chemical_melting_point                            ?

#==============================================================================
# CRYSTAL DATA
_space_group_crystal_system                        monoclinic
_space_group_name_H-M_alt                         'P 1 21/c 1'
_space_group_name_Hall                            '-P 2ybc'
_space_group_IT_number                             14
loop_
_space_group_symop_id
_space_group_symop_operation_xyz
1   '+X,+Y,+Z'
2   '-X,1/2+Y,1/2-Z'
3   '-X,-Y,-Z'
4   '+X,-1/2-Y,-1/2+Z'
#------------------------------------------------------------------------------
_cell_length_a                                     8.394(2)
_cell_length_b                                     16.964(5)
_cell_length_c                                     10.681(3)
_cell_angle_alpha                                  90.0000
_cell_angle_beta                                   90.818(7)
_cell_angle_gamma                                  90.0000
_cell_volume                                       1520.8(7)
_cell_formula_units_Z                              8
_cell_measurement_reflns_used                      4208
_cell_measurement_theta_min                        2.30
_cell_measurement_theta_max                        27.50
_cell_measurement_temperature                      93
#------------------------------------------------------------------------------
_exptl_crystal_description                         prism
_exptl_crystal_colour                              colorless
_exptl_crystal_size_max                            0.200
_exptl_crystal_size_mid                            0.100
_exptl_crystal_size_min                            0.100
_exptl_crystal_density_diffrn                      1.425
_exptl_crystal_density_meas                        ?
_exptl_crystal_density_method                     'not measured'
_exptl_crystal_F_000                               688.00
_exptl_absorpt_coefficient_mu                      0.102
_exptl_absorpt_correction_type                     multi-scan
_exptl_absorpt_process_details                    'REQAB (Rigaku, 1998)'
_exptl_absorpt_correction_T_min                    0.716
_exptl_absorpt_correction_T_max                    0.990

#==============================================================================
# EXPERIMENTAL DATA

_diffrn_ambient_temperature                        93
_diffrn_radiation_type                            'Mo K\a'
_diffrn_radiation_wavelength                       0.71075
_diffrn_measurement_device_type                   'Rigaku XtaLAB P200'
_diffrn_measurement_method                         \w
_diffrn_detector_area_resol_mean                   5.814
_diffrn_reflns_number                              7224
_diffrn_reflns_av_unetI/netI                       0.0296
_diffrn_reflns_av_R_equivalents                    0.0281
_diffrn_reflns_theta_max                           25.355
_diffrn_reflns_theta_min                           2.253
_diffrn_reflns_theta_full                          25.242
_diffrn_measured_fraction_theta_max                0.986
_diffrn_measured_fraction_theta_full               0.986
_diffrn_reflns_Laue_measured_fraction_max          0.986
_diffrn_reflns_Laue_measured_fraction_full         0.986
_diffrn_reflns_point_group_measured_fraction_max   0.986
_diffrn_reflns_point_group_measured_fraction_full  0.986
_diffrn_reflns_limit_h_min                        -10
_diffrn_reflns_limit_h_max                         8
_diffrn_reflns_limit_k_min                        -14
_diffrn_reflns_limit_k_max                         20
_diffrn_reflns_limit_l_min                        -12
_diffrn_reflns_limit_l_max                         12
_diffrn_standards_number                           0
_diffrn_standards_interval_count                   .
_diffrn_standards_decay_%                          ?
_reflns_number_total                               2745
_reflns_number_gt                                  2584
_reflns_threshold_expression                       F^2^>2.0\s(F^2^)
_reflns_Friedel_coverage          0.000
_reflns_Friedel_fraction_max      .
_reflns_Friedel_fraction_full     .

#==============================================================================
# REFINEMENT DATA

_refine_special_details
;
    Refinement was performed using all reflections. The weighted 
    R-factor (wR) and goodness of fit (S) are based on F^2^.
    R-factor (gt) are based on F. The threshold expression of
    F^2^ > 2.0 sigma(F^2^) is used only for calculating R-factor (gt).
;
_refine_ls_structure_factor_coef                   Fsqd
_refine_ls_R_factor_all                            0.0410
_refine_ls_R_factor_gt                             0.0393
_refine_ls_wR_factor_ref                           0.1075
_refine_ls_wR_factor_gt                            0.1062
_refine_ls_number_restraints                       2
_refine_ls_hydrogen_treatment                      mixed
_refine_ls_number_reflns                           2745
_refine_ls_number_parameters                       226
_refine_ls_goodness_of_fit_ref                     1.048
_refine_ls_weighting_scheme                        calc
_refine_ls_weighting_details
           'w = 1/[\s^2^(Fo^2^)+(0.0568P)^2^+0.7438P] where P=(Fo^2^+2Fc^2^)/3'
_atom_sites_solution_hydrogens                     geom
_atom_sites_solution_primary                       direct
_atom_sites_solution_secondary                     difmap
_refine_ls_shift/su_max                            0.000
_refine_diff_density_max                           0.48
_refine_diff_density_min                          -0.26
_refine_ls_extinction_method                       SHELXL
_refine_ls_extinction_coef                         0.018(3)

loop_
_atom_type_symbol
_atom_type_description
_atom_type_scat_dispersion_real
_atom_type_scat_dispersion_imag
_atom_type_scat_source
  'C' 'C'  0.0033 0.0016 
;
International Tables for Crystallography
(Vol. C, Tables 4.2.6.8 and 6.1.1.4)
;
  'H' 'H'  0.0000 0.0000 
;
International Tables for Crystallography
(Vol. C, Table 6.1.1.4)
;
  'N' 'N'  0.0061 0.0033 
;
International Tables for Crystallography
(Vol. C, Tables 4.2.6.8 and 6.1.1.4)
;
  'O' 'O'  0.0106 0.0060 
;
International Tables for Crystallography
(Vol. C, Tables 4.2.6.8 and 6.1.1.4)
;

#==============================================================================
# ATOMIC COORDINATES AND THERMAL PARAMETERS

loop_
 _atom_site_label
 _atom_site_type_symbol
 _atom_site_fract_x
 _atom_site_fract_y
 _atom_site_fract_z
 _atom_site_U_iso_or_equiv
 _atom_site_adp_type
 _atom_site_occupancy
 _atom_site_site_symmetry_order  
 _atom_site_calc_flag
 _atom_site_refinement_flags_posn
 _atom_site_refinement_flags_adp
 _atom_site_refinement_flags_occupancy
 _atom_site_disorder_assembly
 _atom_site_disorder_group
O2 O 0.80123(11) 0.54140(6) 0.19798(9) 0.0209(3) Uani 1 1 d . . . . .
O9 O 0.50524(12) 0.61502(6) 0.53483(9) 0.0240(3) Uani 1 1 d . . . . .
O12 O 0.00102(12) 0.60171(6) 0.48841(9) 0.0220(3) Uani 1 1 d . . . . .
O19 O 0.32155(11) 0.64974(6) 0.82912(10) 0.0225(3) Uani 1 1 d . . . . .
N1 N 0.68360(13) 0.57942(7) 0.38219(11) 0.0177(3) Uani 1 1 d D . . . .
N11 N 0.19030(13) 0.62346(7) 0.64298(11) 0.0180(3) Uani 1 1 d D . . . .
C2 C 0.68206(16) 0.55042(8) 0.26009(13) 0.0162(3) Uani 1 1 d . . . . .
C3 C 0.51071(15) 0.53366(8) 0.22149(12) 0.0164(3) Uani 1 1 d . . . . .
H3 H 0.492288 0.476300 0.205252 0.020 Uiso 1 1 calc R U . . .
C4 C 0.45208(16) 0.58613(8) 0.10891(13) 0.0188(3) Uani 1 1 d . . . . .
H4 H 0.520476 0.586259 0.033021 0.023 Uiso 1 1 calc R U . . .
C5 C 0.27846(16) 0.56250(8) 0.08873(13) 0.0206(3) Uani 1 1 d . . . . .
H5 H 0.236945 0.532829 0.020249 0.025 Uiso 1 1 calc R U . . .
C6 C 0.19503(17) 0.59079(8) 0.18408(14) 0.0207(3) Uani 1 1 d . . . . .
H6 H 0.083497 0.585405 0.195314 0.025 Uiso 1 1 calc R U . . .
C7 C 0.31103(16) 0.63325(8) 0.27160(13) 0.0195(3) Uani 1 1 d . . . . .
H7 H 0.263852 0.672265 0.330672 0.023 Uiso 1 1 calc R U . . .
C8 C 0.41091(16) 0.56411(8) 0.33246(13) 0.0170(3) Uani 1 1 d . . . . .
H8 H 0.339975 0.521870 0.365694 0.020 Uiso 1 1 calc R U . . .
C9 C 0.53266(16) 0.58994(8) 0.42977(13) 0.0177(3) Uani 1 1 d . . . . .
C10 C 0.43076(17) 0.66611(8) 0.17586(14) 0.0211(3) Uani 1 1 d . . . . .
H10A H 0.383786 0.707124 0.120692 0.025 Uiso 1 1 calc R U . . .
H10B H 0.530440 0.685619 0.215652 0.025 Uiso 1 1 calc R U . . .
C12 C 0.03673(16) 0.61111(8) 0.59893(13) 0.0168(3) Uani 1 1 d . . . . .
C13 C -0.07582(15) 0.61331(8) 0.70865(13) 0.0163(3) Uani 1 1 d . . . . .
H13 H -0.138476 0.563407 0.715608 0.020 Uiso 1 1 calc R U . . .
C14 C -0.18694(16) 0.68825(8) 0.70874(14) 0.0190(3) Uani 1 1 d . . . . .
H14 H -0.244603 0.700216 0.628398 0.023 Uiso 1 1 calc R U . . .
C15 C -0.28991(16) 0.67821(8) 0.82386(14) 0.0216(3) Uani 1 1 d . . . . .
H15 H -0.400605 0.666548 0.823878 0.026 Uiso 1 1 calc R U . . .
C16 C -0.19681(17) 0.68872(8) 0.92460(14) 0.0221(3) Uani 1 1 d . . . . .
H16 H -0.228953 0.685452 1.009365 0.026 Uiso 1 1 calc R U . . .
C17 C -0.02902(16) 0.70698(8) 0.87913(13) 0.0194(3) Uani 1 1 d . . . . .
H17 H 0.043480 0.734550 0.939958 0.023 Uiso 1 1 calc R U . . .
C18 C 0.03284(15) 0.62688(8) 0.82495(12) 0.0168(3) Uani 1 1 d . . . . .
H18 H 0.025267 0.582893 0.886904 0.020 Uiso 1 1 calc R U . . .
C19 C 0.19913(16) 0.63473(8) 0.77237(13) 0.0171(3) Uani 1 1 d . . . . .
C20 C -0.06910(16) 0.75174(8) 0.75659(13) 0.0199(3) Uani 1 1 d . . . . .
H20A H -0.120673 0.803326 0.771340 0.024 Uiso 1 1 calc R U . . .
H20B H 0.024188 0.758173 0.701844 0.024 Uiso 1 1 calc R U . . .
H1 H 0.7828(13) 0.5919(11) 0.4265(16) 0.034(5) Uiso 1 1 d D . . . .
H11 H 0.2845(14) 0.6246(11) 0.5911(14) 0.030(5) Uiso 1 1 d D . . . .

loop_
 _atom_site_aniso_label
 _atom_site_aniso_U_11
 _atom_site_aniso_U_22
 _atom_site_aniso_U_33
 _atom_site_aniso_U_23
 _atom_site_aniso_U_13
 _atom_site_aniso_U_12
O2 0.0157(5) 0.0245(5) 0.0225(5) -0.0038(4) 0.0028(4) 0.0008(4)
O9 0.0184(5) 0.0359(6) 0.0179(5) -0.0042(4) 0.0028(4) -0.0010(4)
O12 0.0203(5) 0.0277(6) 0.0181(5) -0.0017(4) -0.0012(4) -0.0012(4)
O19 0.0147(5) 0.0297(6) 0.0229(5) -0.0005(4) -0.0026(4) -0.0010(4)
N1 0.0137(6) 0.0221(6) 0.0173(6) -0.0017(5) -0.0001(4) -0.0011(4)
N11 0.0135(6) 0.0224(6) 0.0181(6) -0.0003(5) 0.0012(5) 0.0003(4)
C2 0.0162(7) 0.0136(6) 0.0189(7) 0.0010(5) -0.0003(5) 0.0009(5)
C3 0.0144(7) 0.0158(6) 0.0191(7) -0.0013(5) 0.0001(5) -0.0002(5)
C4 0.0170(7) 0.0227(7) 0.0167(7) 0.0014(5) 0.0003(5) 0.0004(5)
C5 0.0180(7) 0.0219(7) 0.0217(7) 0.0021(6) -0.0052(5) 0.0009(5)
C6 0.0155(7) 0.0218(7) 0.0247(7) 0.0047(6) -0.0026(6) 0.0020(5)
C7 0.0166(7) 0.0200(7) 0.0220(7) -0.0009(5) 0.0008(6) 0.0034(5)
C8 0.0137(6) 0.0189(7) 0.0186(7) 0.0012(5) 0.0014(5) -0.0009(5)
C9 0.0160(7) 0.0189(7) 0.0183(7) 0.0021(5) 0.0014(5) -0.0007(5)
C10 0.0200(7) 0.0184(7) 0.0246(7) 0.0029(6) -0.0019(6) 0.0003(5)
C12 0.0167(7) 0.0134(6) 0.0204(7) 0.0002(5) -0.0015(5) 0.0003(5)
C13 0.0140(6) 0.0155(6) 0.0194(7) 0.0005(5) -0.0006(5) -0.0004(5)
C14 0.0143(7) 0.0183(7) 0.0244(7) 0.0005(5) -0.0016(5) 0.0019(5)
C15 0.0138(7) 0.0190(7) 0.0322(8) -0.0025(6) 0.0034(6) 0.0009(5)
C16 0.0195(7) 0.0220(7) 0.0248(7) -0.0037(6) 0.0066(6) 0.0011(5)
C17 0.0164(7) 0.0212(7) 0.0205(7) -0.0047(5) 0.0008(5) -0.0012(5)
C18 0.0146(7) 0.0184(7) 0.0174(7) 0.0008(5) -0.0005(5) 0.0006(5)
C19 0.0163(7) 0.0159(6) 0.0190(7) 0.0007(5) -0.0005(5) 0.0022(5)
C20 0.0176(7) 0.0163(6) 0.0258(7) -0.0008(5) 0.0027(5) 0.0005(5)

#==============================================================================
_computing_data_collection
                                'CrystalClear-SM Expert 2.1 b32 (Rigaku, 2014)'
_computing_cell_refinement
                                               'CrystalClear-SM Expert 2.1 b32'
_computing_data_reduction
                                               'CrystalClear-SM Expert 2.1 b32'
_computing_structure_solution
                                      'SHELXT Version 2018/2 (Sheldrick, 2014)'
_computing_structure_refinement
                                      'SHELXL Version 2018/3 (Sheldrick, 2008)'
_computing_publication_material
                                          'CrystalStructure 4.3 (Rigaku, 2019)'
_computing_molecular_graphics                     'CrystalStructure 4.3'

#==============================================================================
# MOLECULAR GEOMETRY

_geom_special_details
;
 All esds (except the esd in the dihedral angle between two l.s. planes)
 are estimated using the full covariance matrix.  The cell esds are taken
 into account individually in the estimation of esds in distances, angles
 and torsion angles; correlations between esds in cell parameters are only
 used when they are defined by crystal symmetry.  An approximate (isotropic)
 treatment of cell esds is used for estimating esds involving l.s. planes.
;

loop_
 _geom_bond_atom_site_label_1
 _geom_bond_atom_site_label_2
 _geom_bond_distance
 _geom_bond_site_symmetry_2
 _geom_bond_publ_flag
O2 C2 1.2178(17) . ?
O9 C9 1.2250(18) . ?
O12 C12 1.2242(18) . ?
O19 C19 1.2126(17) . ?
N1 C9 1.3834(18) . ?
N1 C2 1.3937(18) . ?
N1 H1 0.975(5) . ?
N11 C12 1.3818(18) . ?
N11 C19 1.3961(18) . ?
N11 H11 0.972(5) . ?
C2 C3 1.5175(18) . ?
C3 C8 1.5498(18) . ?
C3 C4 1.5695(19) . ?
C3 H3 1.0000 . ?
C4 C5 1.5239(19) . ?
C4 C10 1.545(2) . ?
C4 H4 1.0000 . ?
C5 C6 1.333(2) . ?
C5 H5 0.9500 . ?
C6 C7 1.522(2) . ?
C6 H6 0.9500 . ?
C7 C10 1.548(2) . ?
C7 C8 1.5766(19) . ?
C7 H7 1.0000 . ?
C8 C9 1.5121(19) . ?
C8 H8 1.0000 . ?
C10 H10A 0.9900 . ?
C10 H10B 0.9900 . ?
C12 C13 1.5162(19) . ?
C13 C18 1.5478(18) . ?
C13 C14 1.5767(18) . ?
C13 H13 1.0000 . ?
C14 C15 1.523(2) . ?
C14 C20 1.5443(19) . ?
C14 H14 1.0000 . ?
C15 C16 1.333(2) . ?
C15 H15 0.9500 . ?
C16 C17 1.528(2) . ?
C16 H16 0.9500 . ?
C17 C20 1.546(2) . ?
C17 C18 1.5682(19) . ?
C17 H17 1.0000 . ?
C18 C19 1.5179(19) . ?
C18 H18 1.0000 . ?
C20 H20A 0.9900 . ?
C20 H20B 0.9900 . ?

loop_
 _geom_angle_atom_site_label_1
 _geom_angle_atom_site_label_2
 _geom_angle_atom_site_label_3
 _geom_angle
 _geom_angle_site_symmetry_1
 _geom_angle_site_symmetry_3
 _geom_angle_publ_flag
C9 N1 C2 113.14(11) . . ?
C9 N1 H1 125.0(11) . . ?
C2 N1 H1 121.8(12) . . ?
C12 N11 C19 113.20(11) . . ?
C12 N11 H11 124.9(11) . . ?
C19 N11 H11 121.9(11) . . ?
O2 C2 N1 123.88(12) . . ?
O2 C2 C3 127.67(13) . . ?
N1 C2 C3 108.45(11) . . ?
C2 C3 C8 104.50(10) . . ?
C2 C3 C4 112.80(11) . . ?
C8 C3 C4 103.29(11) . . ?
C2 C3 H3 111.9 . . ?
C8 C3 H3 111.9 . . ?
C4 C3 H3 111.9 . . ?
C5 C4 C10 100.35(11) . . ?
C5 C4 C3 104.36(11) . . ?
C10 C4 C3 100.41(11) . . ?
C5 C4 H4 116.4 . . ?
C10 C4 H4 116.4 . . ?
C3 C4 H4 116.4 . . ?
C6 C5 C4 107.99(12) . . ?
C6 C5 H5 126.0 . . ?
C4 C5 H5 126.0 . . ?
C5 C6 C7 107.53(12) . . ?
C5 C6 H6 126.2 . . ?
C7 C6 H6 126.2 . . ?
C6 C7 C10 100.39(11) . . ?
C6 C7 C8 103.47(11) . . ?
C10 C7 C8 101.18(10) . . ?
C6 C7 H7 116.4 . . ?
C10 C7 H7 116.4 . . ?
C8 C7 H7 116.4 . . ?
C9 C8 C3 104.77(11) . . ?
C9 C8 C7 114.71(11) . . ?
C3 C8 C7 102.87(10) . . ?
C9 C8 H8 111.3 . . ?
C3 C8 H8 111.3 . . ?
C7 C8 H8 111.3 . . ?
O9 C9 N1 124.49(13) . . ?
O9 C9 C8 126.61(12) . . ?
N1 C9 C8 108.89(12) . . ?
C4 C10 C7 94.02(11) . . ?
C4 C10 H10A 112.9 . . ?
C7 C10 H10A 112.9 . . ?
C4 C10 H10B 112.9 . . ?
C7 C10 H10B 112.9 . . ?
H10A C10 H10B 110.3 . . ?
O12 C12 N11 124.22(13) . . ?
O12 C12 C13 127.00(12) . . ?
N11 C12 C13 108.76(11) . . ?
C12 C13 C18 104.92(11) . . ?
C12 C13 C14 113.29(11) . . ?
C18 C13 C14 102.80(10) . . ?
C12 C13 H13 111.8 . . ?
C18 C13 H13 111.8 . . ?
C14 C13 H13 111.8 . . ?
C15 C14 C20 100.31(11) . . ?
C15 C14 C13 104.65(11) . . ?
C20 C14 C13 100.74(10) . . ?
C15 C14 H14 116.2 . . ?
C20 C14 H14 116.2 . . ?
C13 C14 H14 116.2 . . ?
C16 C15 C14 107.70(12) . . ?
C16 C15 H15 126.2 . . ?
C14 C15 H15 126.2 . . ?
C15 C16 C17 107.64(13) . . ?
C15 C16 H16 126.2 . . ?
C17 C16 H16 126.2 . . ?
C16 C17 C20 100.27(11) . . ?
C16 C17 C18 104.67(11) . . ?
C20 C17 C18 100.50(11) . . ?
C16 C17 H17 116.3 . . ?
C20 C17 H17 116.3 . . ?
C18 C17 H17 116.3 . . ?
C19 C18 C13 104.51(11) . . ?
C19 C18 C17 111.82(11) . . ?
C13 C18 C17 103.33(10) . . ?
C19 C18 H18 112.2 . . ?
C13 C18 H18 112.2 . . ?
C17 C18 H18 112.2 . . ?
O19 C19 N11 123.80(13) . . ?
O19 C19 C18 127.64(13) . . ?
N11 C19 C18 108.55(11) . . ?
C14 C20 C17 93.92(11) . . ?
C14 C20 H20A 112.9 . . ?
C17 C20 H20A 112.9 . . ?
C14 C20 H20B 112.9 . . ?
C17 C20 H20B 112.9 . . ?
H20A C20 H20B 110.4 . . ?

loop_
 _geom_torsion_atom_site_label_1
 _geom_torsion_atom_site_label_2
 _geom_torsion_atom_site_label_3
 _geom_torsion_atom_site_label_4
 _geom_torsion
 _geom_torsion_site_symmetry_1
 _geom_torsion_site_symmetry_2
 _geom_torsion_site_symmetry_3
 _geom_torsion_site_symmetry_4
 _geom_torsion_publ_flag
C9 N1 C2 O2 175.39(12) . . . . ?
C9 N1 C2 C3 -4.25(15) . . . . ?
O2 C2 C3 C8 -174.42(13) . . . . ?
N1 C2 C3 C8 5.20(14) . . . . ?
O2 C2 C3 C4 -62.94(18) . . . . ?
N1 C2 C3 C4 116.68(12) . . . . ?
C2 C3 C4 C5 -177.97(11) . . . . ?
C8 C3 C4 C5 -65.74(13) . . . . ?
C2 C3 C4 C10 -74.35(13) . . . . ?
C8 C3 C4 C10 37.88(12) . . . . ?
C10 C4 C5 C6 -32.35(14) . . . . ?
C3 C4 C5 C6 71.31(14) . . . . ?
C4 C5 C6 C7 -0.72(15) . . . . ?
C5 C6 C7 C10 33.47(14) . . . . ?
C5 C6 C7 C8 -70.80(14) . . . . ?
C2 C3 C8 C9 -4.27(13) . . . . ?
C4 C3 C8 C9 -122.46(11) . . . . ?
C2 C3 C8 C7 115.97(11) . . . . ?
C4 C3 C8 C7 -2.22(12) . . . . ?
C6 C7 C8 C9 -177.33(11) . . . . ?
C10 C7 C8 C9 79.00(14) . . . . ?
C6 C7 C8 C3 69.54(12) . . . . ?
C10 C7 C8 C3 -34.14(12) . . . . ?
C2 N1 C9 O9 -179.75(13) . . . . ?
C2 N1 C9 C8 1.34(15) . . . . ?
C3 C8 C9 O9 -176.85(13) . . . . ?
C7 C8 C9 O9 71.14(18) . . . . ?
C3 C8 C9 N1 2.04(14) . . . . ?
C7 C8 C9 N1 -109.97(13) . . . . ?
C5 C4 C10 C7 49.10(12) . . . . ?
C3 C4 C10 C7 -57.75(11) . . . . ?
C6 C7 C10 C4 -49.64(12) . . . . ?
C8 C7 C10 C4 56.48(12) . . . . ?
C19 N11 C12 O12 178.28(12) . . . . ?
C19 N11 C12 C13 -0.39(15) . . . . ?
O12 C12 C13 C18 -179.85(13) . . . . ?
N11 C12 C13 C18 -1.22(14) . . . . ?
O12 C12 C13 C14 -68.49(17) . . . . ?
N11 C12 C13 C14 110.14(12) . . . . ?
C12 C13 C14 C15 179.30(11) . . . . ?
C18 C13 C14 C15 -68.05(12) . . . . ?
C12 C13 C14 C20 -76.94(13) . . . . ?
C18 C13 C14 C20 35.72(13) . . . . ?
C20 C14 C15 C16 -33.65(14) . . . . ?
C13 C14 C15 C16 70.44(14) . . . . ?
C14 C15 C16 C17 0.59(15) . . . . ?
C15 C16 C17 C20 32.63(14) . . . . ?
C15 C16 C17 C18 -71.20(14) . . . . ?
C12 C13 C18 C19 2.20(13) . . . . ?
C14 C13 C18 C19 -116.49(11) . . . . ?
C12 C13 C18 C17 119.32(11) . . . . ?
C14 C13 C18 C17 0.63(13) . . . . ?
C16 C17 C18 C19 178.80(11) . . . . ?
C20 C17 C18 C19 75.15(13) . . . . ?
C16 C17 C18 C13 66.94(13) . . . . ?
C20 C17 C18 C13 -36.70(13) . . . . ?
C12 N11 C19 O19 -176.80(13) . . . . ?
C12 N11 C19 C18 1.89(15) . . . . ?
C13 C18 C19 O19 176.12(13) . . . . ?
C17 C18 C19 O19 65.01(18) . . . . ?
C13 C18 C19 N11 -2.51(14) . . . . ?
C17 C18 C19 N11 -113.62(12) . . . . ?
C15 C14 C20 C17 49.95(12) . . . . ?
C13 C14 C20 C17 -57.28(12) . . . . ?
C16 C17 C20 C14 -49.53(12) . . . . ?
C18 C17 C20 C14 57.65(11) . . . . ?

loop_
_geom_hbond_atom_site_label_D
_geom_hbond_atom_site_label_H
_geom_hbond_atom_site_label_A
_geom_hbond_site_symmetry_D
_geom_hbond_site_symmetry_H
_geom_hbond_site_symmetry_A
_geom_hbond_distance_DA
_geom_hbond_distance_DH
_geom_hbond_distance_HA
_geom_hbond_angle_DHA
_geom_hbond_publ_flag
N1 H1 O12 . . 1_655 2.9057(16) 0.975(13) 1.946(12) 167.6(14) no
N11 H11 O9 . . . 2.9036(16) 0.972(13) 1.963(12) 162.1(13) no

#==============================================================================
# Additional structures and associated data_? identifiers
# should be added at this point if there is more than one 
# structure analysis in the CIF.

_shelx_res_file
;
TITL ANAA1
    shelxl.res
    created by SHELXL-2018/3 at 17:23:03 on 10-Feb-2022
CELL  0.71075 8.39400 16.96400 10.68100 90.00000 90.81800 90.00000
ZERR  8 0.00200 0.00500 0.00300 0.00000 0.00700 0.00000
LATT 1
SYMM    -X, .50+Y, .50-Z
SFAC C H N O
UNIT 72 72 8 16
OMIT     4   0   0
OMIT     3   1   1
OMIT    -3   2   1
OMIT    -5   1   1
OMIT    -1   0   8
OMIT    -1   1   1
OMIT    -1   1   4
OMIT     0   4   1
OMIT     1   2   1
L.S. 20
FMAP 2
PLAN 4
WPDB -2
HTAB
BOND $H
CONF
LIST 4
TEMP -180.0
ACTA
SIZE 0.100 0.100 0.200
DFIX 0.9800 0.0050 N1 H1 N11 H11
WGHT    0.056800    0.743800
EXTI    0.018210
FVAR       0.86083
O2    4    0.801227    0.541405    0.197978    11.00000    0.01573    0.02448 =
         0.02253   -0.00377    0.00282    0.00077
O9    4    0.505240    0.615024    0.534825    11.00000    0.01841    0.03593 =
         0.01785   -0.00416    0.00276   -0.00102
O12   4    0.001021    0.601705    0.488409    11.00000    0.02025    0.02771 =
         0.01805   -0.00167   -0.00116   -0.00117
O19   4    0.321553    0.649738    0.829118    11.00000    0.01468    0.02975 =
         0.02291   -0.00053   -0.00262   -0.00105
N1    3    0.683599    0.579419    0.382193    11.00000    0.01369    0.02208 =
         0.01731   -0.00172   -0.00009   -0.00112
N11   3    0.190295    0.623455    0.642981    11.00000    0.01352    0.02242 =
         0.01807   -0.00028    0.00121    0.00030
C2    1    0.682063    0.550421    0.260091    11.00000    0.01622    0.01364 =
         0.01886    0.00102   -0.00026    0.00088
C3    1    0.510706    0.533659    0.221486    11.00000    0.01437    0.01575 =
         0.01906   -0.00128    0.00008   -0.00016
AFIX  13
H3    2    0.492288    0.476300    0.205252    11.00000   -1.20000
AFIX   0
C4    1    0.452080    0.586133    0.108914    11.00000    0.01695    0.02271 =
         0.01670    0.00143    0.00033    0.00036
AFIX  13
H4    2    0.520476    0.586259    0.033021    11.00000   -1.20000
AFIX   0
C5    1    0.278457    0.562500    0.088729    11.00000    0.01796    0.02192 =
         0.02165    0.00205   -0.00523    0.00091
AFIX  43
H5    2    0.236945    0.532829    0.020249    11.00000   -1.20000
AFIX   0
C6    1    0.195034    0.590787    0.184080    11.00000    0.01547    0.02182 =
         0.02466    0.00473   -0.00258    0.00200
AFIX  43
H6    2    0.083497    0.585405    0.195314    11.00000   -1.20000
AFIX   0
C7    1    0.311032    0.633254    0.271603    11.00000    0.01665    0.02003 =
         0.02199   -0.00095    0.00084    0.00342
AFIX  13
H7    2    0.263852    0.672265    0.330672    11.00000   -1.20000
AFIX   0
C8    1    0.410905    0.564111    0.332462    11.00000    0.01370    0.01885 =
         0.01855    0.00123    0.00141   -0.00094
AFIX  13
H8    2    0.339975    0.521870    0.365694    11.00000   -1.20000
AFIX   0
C9    1    0.532658    0.589941    0.429767    11.00000    0.01602    0.01891 =
         0.01830    0.00214    0.00144   -0.00068
C10   1    0.430762    0.666111    0.175857    11.00000    0.02003    0.01843 =
         0.02463    0.00290   -0.00189    0.00032
AFIX  23
H10A  2    0.383786    0.707124    0.120692    11.00000   -1.20000
H10B  2    0.530440    0.685619    0.215652    11.00000   -1.20000
AFIX   0
C12   1    0.036730    0.611113    0.598931    11.00000    0.01670    0.01335 =
         0.02036    0.00020   -0.00152    0.00028
C13   1   -0.075820    0.613313    0.708649    11.00000    0.01397    0.01549 =
         0.01943    0.00054   -0.00059   -0.00039
AFIX  13
H13   2   -0.138476    0.563407    0.715608    11.00000   -1.20000
AFIX   0
C14   1   -0.186936    0.688248    0.708737    11.00000    0.01431    0.01826 =
         0.02440    0.00051   -0.00157    0.00194
AFIX  13
H14   2   -0.244603    0.700216    0.628398    11.00000   -1.20000
AFIX   0
C15   1   -0.289909    0.678208    0.823862    11.00000    0.01380    0.01902 =
         0.03220   -0.00251    0.00344    0.00089
AFIX  43
H15   2   -0.400605    0.666548    0.823878    11.00000   -1.20000
AFIX   0
C16   1   -0.196809    0.688719    0.924603    11.00000    0.01951    0.02204 =
         0.02479   -0.00367    0.00655    0.00109
AFIX  43
H16   2   -0.228953    0.685452    1.009365    11.00000   -1.20000
AFIX   0
C17   1   -0.029019    0.706976    0.879128    11.00000    0.01642    0.02120 =
         0.02051   -0.00466    0.00080   -0.00116
AFIX  13
H17   2    0.043480    0.734550    0.939958    11.00000   -1.20000
AFIX   0
C18   1    0.032843    0.626881    0.824948    11.00000    0.01459    0.01837 =
         0.01735    0.00079   -0.00049    0.00058
AFIX  13
H18   2    0.025267    0.582893    0.886904    11.00000   -1.20000
AFIX   0
C19   1    0.199133    0.634731    0.772367    11.00000    0.01626    0.01589 =
         0.01899    0.00065   -0.00054    0.00217
C20   1   -0.069104    0.751735    0.756585    11.00000    0.01758    0.01632 =
         0.02576   -0.00076    0.00265    0.00053
AFIX  23
H20A  2   -0.120673    0.803326    0.771340    11.00000   -1.20000
H20B  2    0.024188    0.758173    0.701844    11.00000   -1.20000
AFIX   0
H1    2    0.782809    0.591851    0.426538    11.00000    0.03439
H11   2    0.284528    0.624644    0.591097    11.00000    0.02979
HKLF 4


REM  ANAA1
REM wR2 = 0.1075, GooF = S = 1.048, Restrained GooF = 1.049 for all data
REM R1 = 0.0393 for 2584 Fo > 4sig(Fo) and 0.0410 for all 2745 data
REM 226 parameters refined using 2 restraints

END

WGHT      0.0548      0.7547

REM Instructions for potential hydrogen bonds
EQIV $1 x+1, y, z
HTAB N1 O12_$1
HTAB N11 O9

REM Highest difference peak  0.484,  deepest hole -0.261,  1-sigma level  0.055
Q1    1  -0.3104  0.7448  0.9031  11.00000  0.05    0.48
Q2    1   0.4871  0.5602  0.1672  11.00000  0.05    0.31
Q3    1  -0.0225  0.6193  0.7663  11.00000  0.05    0.29
Q4    1  -0.1308  0.6485  0.7019  11.00000  0.05    0.28
;

_shelx_res_checksum   76183

_shelx_hkl_file
;
   0  -1   1  530.85   15.08
   0  -2   0  854.83   24.00
   0  -2   0 1180.42   33.18
   1  -1   0    8.26    0.96
   1   0  -1    0.54    0.94
   0  -2   1  174.13    5.25
   0  -2   1  181.75    5.56
   0  -2  -1  179.33    5.77
   1   0   1    0.05    0.72
  -1   0  -1   -0.56    0.53
  -1   0  -1    0.14    0.91
  -1   1   1   23.77    1.47
  -1   1  -1   89.42    3.06
  -1   2   0 3285.36   91.18
   0  -3   0    0.36    0.65
   0  -3   0   -0.48    0.75
   1  -2  -111242.08  383.78
   1  -2   1 6788.27  187.51
   0  -1  -2  309.28    9.02
   0   1  -2  302.42   11.82
   0  -1   2  313.85    9.14
   0   1  -2  299.88    8.81
   0  -1   2  336.50    9.87
   0   3   1    9.37    0.69
   0  -3   1    9.25    0.73
   0  -3   1    9.35    0.87
   0   3  -1    9.42    0.83
   0  -3  -1    9.89    1.05
   0   3  -1    7.90    0.68
   1  -3   0 3352.59   93.26
  -1  -3   0 3376.00   93.51
   1  -3   0 3299.67   91.63
  -1   3   0 3259.97   90.41
  -1   0   2 1460.36   41.60
   0   2   2   47.33    1.95
   0  -2  -2   50.53    2.08
   0  -2  -2   54.34    2.52
   0  -2   2   50.99    1.90
   0   2  -2   48.97    1.82
   0   2  -2   48.96    2.02
   0  -2   2   49.83    1.96
  -1   0  -2 3359.96   93.32
  -1   0  -2 3185.66   88.79
  -1   1   2    1.14    1.11
   1  -1  -2    1.21    1.00
   1   1   2  469.22   13.52
  -1  -1  -2  548.01   15.64
   1  -1   2  536.91   15.35
  -1   1  -2  532.73   15.20
  -1   1  -2  500.97   14.32
  -1  -1  -2  538.10   15.43
   1  -3  -1 1039.22   32.80
  -1   3   1 1006.86   34.02
  -1  -3   1 1161.18   32.66
  -1  -3   1 1120.23   31.60
  -1   3  -1 1458.66   40.81
   1  -3   1 1482.29   41.46
  -1  -3  -1 1468.47   41.08
   1   3   1 1511.74   42.18
  -1   3  -1 1477.14   47.15
   1  -3   1 1473.34   41.18
   0   4   011668.40  399.01
  -2   0   0  121.11    4.08
  -2   1   0 1813.79   50.67
   1  -2  -2  463.58   13.78
  -1  -2   2  454.33   13.38
  -1   2   2  392.70   13.10
  -1  -2   2  414.89   12.17
   1   2   2  341.73   11.52
   1   2   2  335.54    9.96
  -1   2  -2  346.73   10.06
  -1  -2  -2  352.15   10.26
   1  -2   2  347.00   10.13
  -1   2  -2  342.54   10.02
   0   4   1 8843.17  350.04
   0   4  -110414.96  513.36
  -2   0   1    0.37    0.83
  -2   0  -1    0.59    0.60
   2   0   1    0.41    0.73
   0   3  -2 1606.79   47.58
   0   3   2 1502.01   58.60
   0   3  -2 1576.65   44.70
   0  -3   2 1611.37   44.93
   0   3   2 1531.67   42.74
   0  -3   2 1647.25   46.90
   0  -3  -2 1705.28   47.95
  -2   1   1 3408.02  116.87
  -2  -1   1 3380.31   93.97
   2  -1  -1 3533.80   98.96
   2   1   1 1357.64   38.17
  -2   1  -1 1394.01   39.06
  -2  -1  -1 1327.58   37.47
  -2   1  -1 1392.02   39.06
   1   4   0    7.77    0.75
   1  -4   0    7.44    0.96
  -1  -4   0    8.06    0.81
   1  -4   0    7.18    0.92
  -1   4   0    7.67    0.94
  -2   2   0    1.60    0.79
   2  -2   0    0.71    0.86
  -2  -2   0    1.06    0.75
   2   2   0    1.32    0.89
  -1  -4   1 3054.42   92.07
  -1  -4   1 3214.54   89.78
  -1   4   1 2960.75   84.20
   1  -4  -1 2879.09   84.10
  -2  -2   1 1361.81   40.45
   2  -2  -1 1163.74   33.36
  -2   2   1 1196.40   34.26
   1  -4   1  210.74    6.79
  -1   4  -1  222.14    7.54
   1   4   1  211.45    6.46
   1  -4   1  215.81    6.63
  -1  -4  -1  226.76    6.91
   0   0  -3    0.26    0.45
   1  -3  -2 2241.23   71.83
  -1  -3   2 2258.55   68.76
  -1  -3   2 2193.29   61.80
   2   2   1 1142.58   34.33
  -2   2  -1 1061.18   29.86
  -2   2  -1 1100.81   32.06
  -2  -2  -1 1120.74   31.60
  -1   3  -2  452.43   13.22
  -1  -3  -2  477.04   13.83
   1  -3   2  422.00   12.98
  -1   3  -2  491.19   15.02
   1  -3   2  454.53   13.08
   1   3   2  475.72   15.60
   0  -5   0    0.96    0.82
   0   5   0    0.48    0.53
   0  -5   0    0.17    0.59
  -2  -3   0  807.87   23.16
   2  -3   0  800.84   22.87
  -2   3   0  740.97   22.34
   2   0  -2 3652.96  139.77
  -2   0   2 3547.28  136.16
   0   4  -2  163.24    5.44
   0  -4  -2  167.94    6.45
   0  -4   2  160.27    4.87
   0   4   2  153.45    6.19
   0   4   2  154.25    4.72
   0   4  -2  127.35    4.18
   0  -4   2  172.12    5.39
   0   2  -3   16.22    0.95
   0  -2  -3   16.39    0.92
   0   2   3   15.62    1.25
   0  -2   3   16.53    1.04
   0   2  -3   16.61    1.04
   0   2   3   17.22    0.93
   0  -2   3   17.05    0.95
  -2   0  -2 5214.62  144.38
   2   0   2 5003.60  138.53
  -2  -1   2  342.53   12.50
   2  -1  -2  338.99   10.27
  -2   1   2  339.08   11.57
  -1   0  -3    0.07    0.47
  -1   0  -3    0.20    0.46
   1   0   3    0.19    0.51
  -1  -1   3  107.39    5.31
   0   5   1 7156.44  229.76
   0  -5  -1 8024.74  242.31
   0   5  -1 6368.13  206.86
   0  -5   1 8176.33  255.88
   2  -3  -1  337.39   11.09
  -2   3   1  347.59   11.50
   2  -1   2 1425.92   40.05
  -2  -1  -2 1481.11   41.54
   2   1   2 1401.67   42.24
  -2   1  -2 1223.36   34.87
  -2   1  -2 1477.26   43.06
  -2  -1  -2 1525.73   42.68
   2  -3   1   80.87    3.01
  -2  -3  -1   85.04    3.14
  -2   3  -1   65.23    2.58
   2  -3   1   74.12    2.77
  -2   3  -1   81.14    2.92
  -1  -1  -3  109.42    3.48
  -1   1  -3  123.34    3.89
   1   1   3  110.84    3.59
  -1   1  -3  107.40    3.50
  -1  -5   0 3623.97  108.20
  -1  -5   0 4076.70  113.90
  -1   5   0 3783.03  108.91
   1  -5   0 3810.10  114.50
   1  -5   0 3829.79  107.91
   1   5   0 3649.16  117.23
  -1  -4   2   57.63    2.12
  -1  -4   2   57.38    2.35
   1  -4  -2   56.85    2.55
   2  -2  -2   23.62    1.47
  -2  -2   2   22.23    1.59
  -2   2   2   24.34    1.54
   1   4   2 1082.15   34.61
  -1  -4  -2 1237.26   34.75
  -1   4  -2 1213.73   38.53
   1  -4   2 1146.55   32.16
   1  -4   2 1179.53   35.36
  -1  -4  -2 1161.07   37.93
  -1   4  -2 1162.38   32.84
   1  -2  -3   83.06    3.57
  -1  -2   3   80.55    2.73
  -1  -2   3   78.82    3.18
   2  -2   2  688.94   19.68
   2   2   2  588.91   22.35
  -2  -2  -2  662.96   20.04
  -2   2  -2  698.85   19.86
  -2  -2  -2  678.96   19.39
  -2   2  -2  684.26   22.13
   1  -2   3  957.56   26.99
  -1   2  -3  922.00   28.47
  -1   2  -3  949.23   27.35
   1   2   3 1005.19   28.34
   1   2   3  919.39   25.93
  -1  -2  -3  958.81   26.89
   1   5  -1 1259.37   38.06
  -1  -5   1 1312.74   37.98
  -1   5   1 1274.90   36.31
  -1  -5   1 1226.50   37.46
   1  -5  -1 1254.62   37.75
   1  -5   1  174.69    5.71
  -1   5  -1  182.03    6.03
   1   5   1  174.43    5.90
   1  -5   1  168.78    5.31
  -1  -5  -1  174.64    5.46
   0   3   3 1657.04   46.84
   0   3  -3 1626.55   51.05
   0  -3  -3 1721.51   49.42
   0  -3   3 1650.76   50.65
   0   3  -3 1662.58   56.98
   0   3   3 1540.28   55.58
   0  -3   3 1634.59   45.95
  -2   4   0  194.90    6.25
  -2  -4   0  208.15    6.27
   2  -4   0  191.30    6.38
   2  -4  -1 2563.75   77.50
  -2   4   1 2756.26   91.70
  -2  -4   1 2836.94   80.02
   2  -4   1 3060.37   86.01
  -2   4  -1 3072.56   92.95
  -2  -4  -1 3235.57  111.59
  -2  -4  -1 2879.94   80.11
   2  -4   1 2969.73   82.94
   2  -3  -2    3.35    0.91
  -2   3   2    3.64    0.85
   0  -5   2  180.78    5.53
   0  -5  -2  177.13    6.31
   0   5   2  172.10    5.91
   0   5  -2  177.12    6.44
   0  -5   2  186.95    6.03
   1  -3  -3    9.55    1.06
   1   3  -3    9.27    0.80
  -1  -3   3    9.83    0.76
  -1  -3   3    9.37    0.84
  -2   3  -2    1.97    0.59
   2   3   2    2.02    0.53
   2  -3   2    2.04    0.79
  -2  -3  -2    2.23    0.64
  -2   3  -2    3.35    0.62
   0   6   0 2625.18   77.69
   0  -6   0 2740.36   83.65
   0   6   0 2594.21   77.32
   0  -6   0 2745.25   77.95
  -1   3  -3 2503.10   72.11
   1  -3   3 2579.15   72.29
  -1   3  -3 2379.35   75.22
  -1  -3  -3 2490.56   69.06
   1   3   3 2845.22   79.72
   1   3   3 2458.13   68.47
   3   0   0   -0.61    0.54
  -3   0   0    3.37    0.71
  -3   1   0    2.59    0.69
  -3  -1   0    1.74    0.76
   3   1   0    1.90    0.82
   3  -1   0    5.45    1.20
  -2   0   3    0.30    0.76
   0   6  -1 6171.38  176.50
   0  -6   1 6115.50  174.62
   0  -6   1 6409.99  199.53
   0   6   1 6264.32  194.31
   0  -6  -1 6292.97  190.23
   0  -6  -1 6307.98  174.28
   0   4  -3  661.07   23.20
   0   4   3  641.56   18.53
   0  -4   3  645.37   18.35
   0   4   3  631.37   20.90
   0  -4  -3  692.30   20.69
   0   4  -3  620.61   18.58
   0  -4   3  638.54   20.27
  -1   5   2 2419.52   78.29
  -1  -5   2 2599.72   75.67
   1  -5  -2 2499.89   78.31
  -1  -5   2 2615.18   81.81
  -3   0   1    0.32    0.73
  -1   5  -2 4285.00  126.74
  -1  -5  -2 4137.01  116.27
   1   5   2 4172.99  118.14
   1  -5   2 4235.81  117.96
   1  -5   2 4325.49  125.40
  -1  -5  -2 3958.12  129.43
   2  -1  -3 1714.63   67.99
  -2  -1   3 1770.84   69.03
  -2   1   3 1726.07   60.78
   3   0   1    0.37    0.67
  -3   0  -1    0.16    0.51
   2   0   3   -0.20    0.50
   2   0   3    1.31    0.84
  -2   0  -3   -0.06    0.53
  -2   0  -3   -0.17    0.49
  -3  -1   1  268.10    9.87
  -3   1   1  270.44    9.13
   1  -6   0  405.73   11.96
  -1   6   0  385.44   11.39
   1  -6   0  385.13   11.85
  -1  -6   0  381.79   11.85
   1   6   0  371.94   11.90
  -1  -6   0  384.55   11.70
   0   0  -4    1.61    0.45
   0   0   4    4.90    0.82
   3  -1   1   -0.54    0.55
   3   2   0  428.24   12.72
  -3  -2   0  432.39   12.83
  -3   2   0  404.99   12.25
  -2   5   0    0.89    0.52
   2  -5   0    0.24    0.73
  -2   5   0    0.43    0.52
  -2  -5   0    0.67    0.43
   0  -1  -4    2.21    0.47
   0   1  -4    2.78    0.48
   0   1   4    1.62    0.45
  -2  -4   2 4851.66  150.90
  -2   4   2 4448.93  137.18
   2  -4  -2 4797.70  158.44
  -2   2   3   16.69    1.26
   2  -2  -3   17.36    1.33
   1   6  -1   14.09    0.92
   1  -6  -1   14.12    1.11
  -1  -6   1   14.69    0.85
  -1   6   1   14.65    0.99
  -1  -6   1   15.79    1.02
  -1   6   1   13.30    1.09
   1   4  -3  359.90   11.60
  -1   4   3  342.06   12.19
   1   4  -3  355.24   10.35
  -1  -4   3  353.62   11.60
  -1  -4   3  345.58   10.57
   1  -4  -3  345.14   12.65
  -1  -6  -1    9.12    0.65
  -1  -6  -1    9.71    0.89
   1   6   1    9.40    0.76
  -1   6  -1    9.23    0.77
  -1   6  -1    7.92    0.81
   1  -6   1    9.14    0.89
   1  -6   1    9.18    0.85
   2  -4   2 3585.97  124.00
  -2   4  -2 3615.04  129.55
  -2   4  -2 3636.03  127.28
   3   2  -1   -0.48    0.66
  -1  -4  -3   32.22    1.52
  -1   4  -3   34.86    1.61
  -1   4  -3   33.59    1.62
   1  -4   3   35.11    1.65
   1  -4   3   35.39    1.75
   1   4   3   33.28    1.75
   1   4   3   36.11    1.99
   3  -2   1   16.19    1.42
   3   2   1   14.78    1.18
  -3  -2  -1   14.09    1.02
  -3   2  -1   15.40    1.20
  -3   2  -1   12.67    0.96
  -2  -2  -3   19.47    1.10
  -2   2  -3   21.69    1.20
   2  -2   3   19.79    1.22
   2   2   3   20.59    1.38
  -2   2  -3   22.71    1.29
  -2  -2  -3   21.22    1.22
   2   2   3   18.80    1.21
  -2  -5   1 1501.40   55.04
   2  -5  -1 1466.74   54.71
  -2   5   1 1495.27   56.98
  -2   5   1 1454.96   51.05
  -2  -5  -1 1251.29   43.13
  -2   5  -1 1176.18   44.01
   2  -5   1 1181.98   41.25
   2  -5   1 1175.12   43.54
  -1   0   4 5314.62  180.01
   0  -2  -4   26.38    1.39
   0   2  -4   29.17    1.62
   0   2   4   26.29    1.66
   0   2   4   27.75    1.36
   0   2  -4   27.54    1.39
   1   0   4 1784.25   64.73
  -1   0  -4 2006.08   75.13
  -1   0  -4 2148.67   74.02
  -1   1   4   -0.33    0.31
  -3   3   0   35.21    1.82
  -3  -3   0   37.44    1.94
   1   1   4 1263.95   46.49
  -1   1  -4 1234.45   44.06
   1   1   4 1214.07   41.85
  -1  -1  -4 1284.19   44.39
  -1   1  -4 1142.96   42.18
   0  -6   2 1638.52   59.09
   0   6  -2 1415.62   50.26
   0   6   2 1573.17   54.37
   0  -6   2 1616.61   55.87
   0  -6  -2 1557.30   58.28
   0   6   2 1565.26   57.56
  -3   0   2    9.95    1.03
  -3  -1   2 5224.62  203.31
  -3   1   2 5231.35  185.84
   3   0   2  117.64    4.58
  -3   0  -2  121.00    4.70
  -3   0  -2  114.52    4.43
   2  -3  -3  344.58   14.08
   0  -5   3   44.09    1.92
   0  -5   3   46.67    2.13
   0   5   3   45.86    2.28
   0  -5  -3   43.08    2.20
   0   5  -3   45.49    2.26
   0   5   3   44.95    1.95
   0   5  -3   40.20    1.83
  -3   3   1  325.82   12.55
   3  -3  -1  319.67   12.42
  -3  -3   1  308.26   13.23
  -1   2   4  144.43    6.98
  -1   2   4  165.57    6.37
  -1  -2   4  170.64    6.83
   3  -1   2 1840.27   63.57
  -3  -1  -2 1852.22   64.57
  -3  -1  -2 2003.66   70.62
  -3   1  -2 1925.01   67.37
  -3   1  -2 1889.50   65.05
   3   1   2 1921.17   66.17
  -3  -3  -1  760.82   27.12
  -3   3  -1  707.09   24.81
  -3   3  -1  780.32   27.23
   3   3   1  837.55   29.44
  -2   3  -3 1785.29   64.63
  -2   3  -3 1699.08   59.30
  -2  -3  -3 1672.73   57.50
   2  -3   3 1491.02   52.66
   2  -3   3 1692.45   58.40
   2   3   3 1682.78   57.90
   1   2   4  198.17    7.63
   1   2   4  197.26    7.19
  -1   2  -4  204.81    7.51
  -1  -2  -4  197.01    7.18
   1  -2   4  196.33    7.51
  -1   2  -4  202.88    8.04
   0   7   0    0.20    0.46
   0  -7   0    0.25    0.45
   0   7   0    0.30    0.39
   0  -7   0    0.54    0.56
   0  -3   4   72.99    2.91
   0   3   4   70.76    2.80
   0  -3  -4   71.18    2.86
   0   3   4   73.08    3.33
   0  -3   4   71.87    3.14
   0   3  -4   70.54    3.16
   0   3  -4   73.98    3.12
  -1  -6   2    1.95    0.53
   1   6  -2    1.32    0.53
   1   6  -2    1.06    0.58
   1  -6  -2    1.05    0.65
  -1   6   2    1.50    0.66
  -1   6   2    1.27    0.55
  -1  -6   2    1.54    0.57
   3  -2  -2   28.28    1.79
  -3  -2   2   29.70    1.81
  -3   2   2   28.73    1.72
   1  -6   2 3822.47  137.25
  -1  -6  -2 3839.52  131.38
   1   6   2 3724.64  137.03
   1  -6   2 3890.51  134.60
  -1  -6  -2 3674.74  131.31
  -1   6  -2 4032.12  148.46
  -2  -5   2 1005.97   35.78
   2  -5  -2  982.33   36.32
  -2  -5   2 1025.21   37.53
  -3   2  -2 1531.40   56.79
  -3  -2  -2 1613.55   55.89
  -3   2  -2 1565.33   53.89
   3   2   2 1572.65   54.28
  -1  -5   3 1866.49   69.03
   1  -5  -3 1756.99   68.74
  -1  -5   3 1803.82   62.87
  -1   5   3 1778.92   73.17
   0  -7  -1   45.98    2.05
   0  -7   1   45.78    2.10
   0  -7   1   45.24    1.97
   0   7  -1   45.27    2.01
   0   7  -1   49.90    2.30
   0  -7  -1   44.51    2.10
   0   7   1   44.24    1.93
   0   7   1   41.45    2.01
   2  -5   2 1054.37   36.90
   2  -5   2 1073.80   38.26
  -2   5  -2 1028.03   38.44
  -1   5  -3  191.14    7.19
   1  -5   3  201.47    7.32
   1   5   3  192.19    7.54
  -1  -5  -3  204.76    7.37
   1  -5   3  198.05    7.49
  -1   5  -3  194.62    7.74
  -1  -5  -3  206.59    8.31
  -2  -6   0 3204.90  115.28
  -2   6   0 3411.67  126.78
  -2   6   0 3311.91  115.23
   2  -6   0 3261.83  115.94
   3  -4   0  107.36    4.30
  -3   4   0  113.64    4.78
  -3  -4   0  112.79    4.60
   1  -7   0 3054.00  112.74
  -1   7   0 3003.86  104.60
   1   7   0 2908.65  105.16
  -1  -7   0 2947.70  105.96
   1  -7   0 3070.47  108.10
  -1  -7   0 2986.74  105.63
  -1   3   4   51.72    2.68
  -1  -3   4   55.93    2.43
   1   3  -4   58.49    2.60
   1  -3  -4   55.02    2.78
  -1   3   4   55.12    2.40
  -1  -3   4   55.93    2.32
   1  -3   4 1151.63   40.25
   1   3   4 1113.37   38.47
   1   3   4 1113.26   47.17
  -1   3  -4 1098.97   41.41
   1   3   4 1099.85   39.98
  -1  -3  -4 1177.71   40.88
  -1   3  -4 1130.37   39.63
   2  -4  -3  181.81    7.76
  -2  -4   3  185.26    7.25
  -2  -4   3  193.77    7.32
  -2   6   1    8.81    0.91
  -2  -6   1    9.36    0.75
  -2  -6   1    9.99    0.80
   2  -6  -1    8.64    0.98
   3  -4  -1  182.50    7.47
  -3  -4   1  199.55    7.65
  -3   4   1  194.75    8.05
   2  -6   1   14.67    1.11
   2  -6   1   13.93    1.10
   2   6   1   14.52    0.92
  -2  -6  -1   15.37    0.97
  -2   6  -1   14.52    0.98
  -2   6  -1   14.83    1.07
  -3  -3   2  870.28   37.81
  -3   3   2  839.35   32.12
   3  -3  -2  858.67   33.26
  -1   7   1 1319.89   45.98
  -1   7   1 1291.08   46.53
  -1  -7   1 1284.26   47.03
   1   7  -1 1324.53   48.64
   1  -7  -1 1301.64   47.62
  -1  -7   1 1292.59   45.60
  -3  -4  -1  378.12   13.51
  -3   4  -1  352.58   13.62
   2   4   3   21.16    1.35
  -2   4  -3   22.78    1.32
  -2  -4  -3   21.82    1.22
   2   4   3   17.68    1.22
  -2   4  -3   21.71    1.18
   2  -4   3   22.09    1.31
   1  -7   1  151.45    5.86
  -1  -7  -1  144.95    5.34
   1  -7   1  150.82    5.64
  -1  -7  -1  150.61    5.91
  -1   7  -1  139.52    5.30
   1   7   1  145.51    5.61
  -2   0   4  810.85   34.89
   0  -4   4  243.57    9.09
   0  -4   4  238.18    8.57
   0   4   4  216.73    9.01
   0   4   4  228.28    8.20
   0   4  -4  236.96    8.97
   0   4  -4  228.18    8.90
  -3   3  -2 2852.40   97.83
   3  -3   2 2622.27   90.18
  -3  -3  -2 2852.18   97.71
   3   3   2 2884.62   99.02
  -3   3  -2 2535.09   90.95
  -2  -1   4  114.82    5.01
  -2   1   4  111.79    5.58
   2   0   4  210.10    7.70
   2   0   4  262.56    9.49
  -2   0  -4  255.28    9.73
  -2   0  -4  282.41   10.08
   3   0  -3   -0.36    0.84
  -3   0   3   -0.04    0.81
   0   6   3  346.39   13.34
   0  -6   3  340.74   12.11
   0   6  -3  348.95   12.99
   0  -6  -3  340.37   13.24
   0  -6   3  391.38   14.91
   0   7  -2  420.01   15.47
   0   7   2  400.84   14.75
   0  -7   2  422.10   15.39
   0  -7  -2  421.25   15.94
   0   7   2  431.91   15.37
   0  -7   2  423.70   15.03
   3  -1  -3   38.11    2.13
  -3  -1   3   38.64    2.24
  -3   1   3   37.97    2.18
   2  -2  -4   23.92    1.82
  -2  -2   4   23.52    1.27
  -1   4   4  156.39    6.08
   1   4  -4  161.84    7.01
  -1  -4   4  156.89    5.96
  -1   4   4  152.91    6.41
   1  -4  -4  159.34    6.73
  -1  -4   4  154.97    5.85
   3   0   3    0.14    0.56
  -3   0  -3    0.03    0.56
  -3   0  -3    0.33    0.47
   1   4   4   27.26    1.41
  -1   4  -4   25.64    1.34
   1  -4   4   27.78    1.40
   1   4   4   28.29    1.74
  -1  -4  -4   31.06    1.42
  -1   4  -4   27.45    1.35
  -3  -1  -3  740.91   26.29
   3  -1   3  745.76   26.34
  -3   1  -3  774.58   26.95
  -3   1  -3  707.27   26.99
  -3  -1  -3  794.21   27.58
   3   1   3  749.27   26.12
   2   2   4  400.61   14.23
  -2  -2  -4  414.94   14.59
  -2   2  -4  369.71   14.41
  -2   2  -4  415.12   14.83
   2   2   4  425.65   15.11
  -3  -5   0   20.03    1.11
   3  -5   0   19.35    1.26
  -3   5   0   19.72    1.25
  -3  -5   0   20.58    1.43
  -3   5   0   18.61    1.27
  -2  -6   2   22.57    1.22
   2  -6  -2   22.93    1.46
  -2  -6   2   22.48    1.23
   3  -4  -2  629.56   24.88
  -3   4   2  617.25   24.75
  -3  -4   2  611.46   25.76
  -1   6   3  878.90   34.70
  -1  -6   3  881.38   32.35
  -1  -6   3  882.52   31.29
   1  -6  -3  874.62   32.86
  -3   2   3  165.45    7.11
  -3  -2   3  167.90    7.51
   3  -2  -3  165.98    7.52
  -2   6  -2  513.67   19.03
  -2  -6  -2  503.10   17.95
   2  -6   2  506.98   17.83
   2  -6   2  510.98   19.02
   1   7  -2 1713.81   65.10
  -1   7   2 1724.49   59.39
   1  -7  -2 1637.53   62.09
  -1   7   2 1719.69   61.99
  -1  -7   2 1894.23   69.22
  -1  -7   2 1712.58   60.53
   1   7  -2 1809.89   67.04
   1   6   3    1.71    0.56
  -1   6  -3    1.98    0.58
   1  -6   3    1.47    0.60
   1  -6   3    1.46    0.57
  -1  -6  -3    1.49    0.60
   0   0   5    1.10    0.58
   0   0  -5    0.24    0.43
   1   7   2  523.92   19.36
  -1   7  -2  510.78   18.17
  -1  -7  -2  541.58   18.83
   1  -7   2  528.36   18.93
  -1   7  -2  525.53   19.92
   1  -7   2  550.35   19.44
  -1  -7  -2  516.02   19.22
   3  -4   2  115.65    4.76
  -3   4  -2  150.73    5.69
  -3   4  -2  143.72    5.81
   3  -4   2  147.56    5.69
  -3  -4  -2  150.10    5.94
  -2  -5   3  937.76   34.05
  -2  -5   3  943.93   34.44
   2  -5  -3  930.15   35.19
   0  -8   0   43.60    1.85
   0   8   0   42.63    1.83
   0  -8   0   44.55    2.03
   0   8   0   43.81    1.99
  -3  -5   1   27.85    1.35
   3  -5  -1   28.43    1.58
  -3  -5   1   29.09    1.88
  -3   5   1   29.69    1.65
   0  -1  -5  355.55   13.26
   0  -1   5  343.65   13.22
   0  -1   5  345.71   12.32
   0   1   5  324.90   11.70
   0   1  -5  359.80   13.96
  -3  -5  -1  565.49   18.86
  -3  -5  -1  560.64   19.08
  -3   5  -1  540.37   19.11
  -2   5  -3   74.85    3.08
   2  -5   3   70.20    2.80
  -2   5  -3   71.59    2.78
  -2  -5  -3   72.20    2.85
  -2  -3   4  135.06    4.87
   2  -3  -4  141.35    5.78
  -2  -3   4  146.02    5.36
  -2   7   0 1110.09   37.15
  -2  -7   0 1077.22   36.79
   2  -7   0 1139.58   40.33
  -2  -7   0 1135.47   39.15
   2   7   0 1109.55   38.20
   4   0   0   -1.02    0.69
   0  -5   4 1176.76   39.49
   0   5  -4 1212.45   45.76
   0  -5   4 1185.32   40.87
   0   5   4 1141.65   41.64
   0   5  -4 1187.60   40.85
   0   5   4 1110.29   37.10
   0  -5  -4 1215.20   44.56
  -2   3  -4  103.15    3.81
   2   3   4  104.96    4.28
   2  -3   4   94.60    3.64
  -2   3  -4  101.44    4.10
   2  -3   4   89.51    3.42
  -2  -3  -4  104.80    3.84
   2   3   4  106.52    4.09
   0  -8   1   36.35    1.74
   0  -8   1   34.73    1.54
   0   8  -1   41.29    2.01
   0   8   1   33.86    1.52
   0  -8  -1   34.64    1.77
   0  -8  -1   33.57    1.58
   0   8   1   35.03    1.74
   0   8  -1   35.34    1.61
  -1   0   5    0.93    0.48
   0  -2  -5  304.09   11.24
   0   2  -5  306.22   10.96
   0   2   5  293.96   10.06
   0   2   5  295.91   12.69
   4   0  -1    2.11    1.05
  -4   0   1   -0.31    0.66
   1   0   5    0.57    0.48
  -1   0  -5    0.18    0.44
   3  -3  -3 1867.60   69.42
  -3  -3   3 1971.91   89.30
  -3   3   3 1922.69   69.02
  -2   7   1  351.42   12.20
  -2  -7   1  348.29   12.15
   2  -7  -1  355.05   13.07
  -2  -7   1  351.26   12.50
   2   7  -1  352.52   13.24
  -1  -1   5    4.52    0.58
  -1   1   5    3.57    0.83
  -1   1   5   -0.58    0.30
   2  -7   1  352.87   12.20
   2   7   1  351.40   12.86
   2  -7   1  343.45   12.44
  -2   7  -1  351.59   12.21
  -2  -7  -1  356.60   12.66
  -2   7  -1  338.50   11.71
  -1   8   0 1774.43   62.26
   1  -8   0 1858.06   64.26
  -1  -8   0 1878.64   62.25
  -1   8   0 1780.72   59.22
  -1  -8   0 1833.89   63.09
   1   8   0 1795.77   65.15
   1  -8   0 1907.44   63.22
   4   0   1    0.43    0.65
  -4   0  -1    0.45    0.54
   4  -1  -1  264.37   10.23
  -4  -1   1  262.38    9.97
  -4   1   1  259.96   10.50
   1  -1   5  121.82    4.48
  -1  -1  -5  120.85    4.45
  -1   1  -5  117.84    5.05
   1   1   5  122.61    4.48
   1   1   5  123.72    4.71
  -1   1  -5  127.28    4.72
  -1  -5   4   84.39    3.38
   1   5  -4   79.11    3.26
   1   5  -4   86.47    3.31
  -1  -5   4   79.81    3.01
   1  -5  -4   84.58    3.78
  -1   5   4   81.58    3.46
  -1   5   4   81.48    3.14
   4  -1   1   -0.99    0.58
  -4  -1  -1    3.85    0.64
   4   1   1    5.09    0.80
  -4   1  -1    4.88    0.70
  -3  -3  -3 2563.67   83.99
  -3  -3  -3 2564.18   84.24
  -3   3  -3 2556.96   84.80
  -3   3  -3 2538.49   86.83
   3   3   3 2613.41   87.36
   3  -3   3 2429.40   81.93
   3  -3   3 2687.85   88.47
   4  -2   0  235.44    9.02
   4   2   0  246.51    8.86
  -4  -2   0  231.95   11.46
  -4   2   0  240.57    9.16
   1  -5   4  463.50   15.71
  -1  -5  -4  439.41   14.83
  -1   5  -4  458.94   17.52
  -1   5  -4  481.32   16.48
   1   5   4  450.83   17.29
   1  -5   4  411.00   14.82
   1   5   4  448.62   15.37
   1   8  -1  428.45   15.47
  -1  -8   1  433.83   14.80
  -1   8   1  432.33   15.33
  -1   8   1  433.72   14.77
   1  -8  -1  435.50   15.47
  -1  -8   1  406.58   14.41
   1   8   1    4.45    0.64
   1  -8   1    4.66    0.66
   1  -8   1    4.39    0.66
  -1  -8  -1    4.99    0.49
  -1   8  -1    4.32    0.60
  -1  -8  -1    4.03    0.64
  -1   2   5  116.56    5.78
  -1   2   5  114.71    4.34
  -3   5   2  429.27   16.24
   3  -5  -2  402.32   15.52
  -3  -5   2  390.53   14.54
  -4  -2   1  229.13    8.96
   4  -2  -1  212.67    8.00
   4   2  -1  202.04    7.66
  -4   2   1  219.75    8.19
  -1  -2  -5  622.51   22.57
   1  -2   5  591.89   20.09
   1   2   5  651.33   23.60
  -1   2  -5  650.96   25.39
  -1   2  -5  668.94   23.22
   1   2   5  662.33   22.19
   1  -2   5  632.47   21.49
   0  -7   3  300.98   10.56
   0  -7  -3  305.89   11.53
   0   7   3  284.66   10.15
   0  -7   3  294.47   10.10
   0   7  -3  252.74    9.27
  -2  -4   4   20.92    1.15
   2  -4  -4   22.24    1.57
  -2  -4   4   24.61    1.24
  -2   4   4   19.38    1.47
   0   3  -5   87.15    3.41
   0  -3  -5   73.23    3.11
   0   3  -5   80.50    3.10
   0   3   5   81.10    3.10
   0   3   5   83.16    3.80
  -4  -2  -1    0.25    0.52
  -4   2  -1   -0.09    0.64
   4   2   1    0.07    0.62
  -4   2  -1    0.34    0.56
  -3   5  -2   10.59    0.87
   3  -5   2   10.30    0.97
  -3   6   0   99.07    3.88
  -3  -6   0   97.81    3.87
   3  -6   0   96.48    3.99
  -3   6   0  101.50    3.92
   2  -4   4  193.09    6.84
  -2   4  -4  173.77    6.42
   2   4   4  194.49    7.12
   2  -4   4  176.59    6.38
  -2   4  -4  189.36    6.71
  -2  -4  -4  197.57    6.86
   2   4   4  168.48    6.14
   0  -8  -2    5.15    0.77
   0  -8   2    5.48    0.61
   0  -8   2    5.68    0.73
   0   8  -2    4.81    0.68
   0   8  -2    5.30    0.56
   0   8   2    5.42    0.69
   0   8   2    4.89    0.69
   4   3   0   82.28    3.59
   4  -3   0   70.73    3.16
  -4   3   0   73.94    3.09
  -4  -3   0   79.00    3.38
  -2   6   3   48.43    2.36
  -2  -6   3   47.90    2.03
   2  -6  -3   47.97    2.40
  -2  -6   3   47.67    2.04
   3  -4  -3    2.81    0.89
  -3   4   3    3.76    0.80
   4   0  -2  449.63   15.75
  -4   0   2  478.71   18.87
  -3  -6   1    1.71    0.49
  -3   6   1    1.93    0.68
  -3   6   1    1.94    0.61
   3  -6  -1    2.02    0.64
   2  -7  -2   57.42    2.61
  -2   7   2   58.81    2.56
   2   7  -2   59.33    2.40
  -2  -7   2   60.15    2.40
  -2  -7   2   57.37    2.36
  -2   7   2   54.14    2.44
  -1  -7   3  270.50    9.51
   1   7  -3  272.74    9.98
  -1   7   3  269.37   10.06
   1  -7  -3  254.39    9.76
  -1   7   3  263.26    9.25
  -1  -7   3  270.88    9.70
  -3  -6  -1  400.66   13.51
  -3   6  -1  389.93   13.48
  -3  -6  -1  427.70   14.99
   3  -6   1  408.74   14.44
  -3   6  -1  426.87   15.83
   2  -6   3  107.61    4.07
  -2  -6  -3  100.67    3.78
  -2   6  -3  110.28    4.31
   2  -6   3  103.21    3.94
  -1   3   5   21.52    1.58
  -1  -3   5   21.39    1.19
   1   3  -5   22.52    1.23
  -1   3   5   21.58    1.12
  -4   1   2  562.44   20.60
   4   1  -2  551.46   20.34
  -4  -1   2  575.10   22.08
  -2   7  -2   13.74    0.96
   2  -7   2   14.50    0.97
   2   7   2   14.41    0.91
  -2   7  -2   14.01    0.89
  -2  -7  -2   13.71    0.99
   2  -7   2   14.00    0.97
  -3   0   4  470.49   18.44
  -1  -7  -3 1396.71   48.45
   1  -7   3 1506.91   51.31
   1   7   3 1432.52   49.49
  -1   7  -3 1510.49   53.72
   1  -7   3 1466.15   48.79
  -4   0  -2 1743.46   57.68
  -4   0  -2 1733.81   57.54
   4   0   2 1778.65   58.79
  -3   4  -3  449.78   15.89
  -3  -4  -3  443.85   15.06
   3  -4   3  473.85   16.09
  -3   4  -3  467.31   15.81
   3  -4   3  414.36   14.77
   0  -6  -4   33.28    1.89
   0  -6   4   35.97    1.71
   0   6   4   34.25    1.78
   0   6  -4   35.51    1.76
   0   6   4   34.19    1.53
   0  -6   4   31.10    1.42
   0   6  -4   29.77    1.41
  -4   3   1  683.67   26.88
  -4  -3   1  722.39   25.97
   1   3   5  836.39   29.13
   1   3   5  812.46   31.42
  -1  -3  -5  840.48   28.38
   1  -3   5  834.95   28.38
   1   3   5  868.34   28.85
  -1   3  -5  882.57   30.68
  -1   3  -5  811.98   29.05
   3  -1  -4 4197.48  176.60
  -3  -1   4 4485.03  162.78
  -3   1   4 4253.93  159.34
  -4   1  -2  318.29   10.97
   4   1   2  318.51   11.04
   4  -1   2  304.64   10.55
  -4   1  -2  305.08   10.58
  -4  -1  -2  300.11   10.42
  -4  -1  -2  298.79   10.41
  -4  -3  -1   47.47    2.13
   4  -3   1   42.24    2.10
  -4   3  -1   48.38    2.21
   4   3   1   51.53    2.41
  -4   3  -1   45.27    2.07
   1   8  -2 2013.81   71.37
  -1  -8   2 1907.38   64.90
  -1   8   2 1896.11   62.24
   1  -8  -2 1747.13   61.83
  -1  -8   2 1934.37   66.08
   1   8  -2 1937.24   69.30
  -1   8   2 1881.38   65.82
   3   0   4  518.85   17.53
  -3   0  -4  501.63   18.44
  -3   0  -4  534.10   18.10
   3   0   4  517.28   17.49
  -1   8  -2  105.31    3.87
   1  -8   2  115.02    4.24
  -1  -8  -2  113.87    4.46
   1   8   2  114.79    4.34
   1  -8   2  110.17    4.16
  -1  -8  -2  113.12    4.09
  -2   0   5    0.50    0.87
  -2   0   5    0.38    0.39
  -4  -2   2  248.03    9.30
  -4   2   2  253.24    9.93
   0   4   5   11.35    0.75
   0   4  -5   11.20    0.78
   0  -4   5   11.03    0.76
   0   4   5   11.47    1.07
   0   4  -5   11.53    0.92
  -3  -1  -4  464.74   15.65
   3   1   4  446.07   16.38
   3  -1   4  446.09   15.22
  -3  -1  -4  435.80   15.08
  -3   1  -4  467.91   15.75
  -3   1  -4  452.85   16.61
   3  -1   4  463.51   15.71
   3  -2  -4  175.25    7.45
  -3  -2   4  186.90    7.72
  -3   2   4  181.58    7.88
  -1   6   4  377.28   13.41
   1  -6  -4  368.76   14.56
  -1  -6   4  382.02   13.56
  -1  -6   4  377.11   12.99
  -2   0  -5    0.69    0.51
   2   0   5    0.11    0.46
  -2   0  -5    0.48    0.52
   2  -8   0 2153.40   76.46
  -2   8   0 2126.07   69.85
   2  -8   0 2165.44   72.09
  -2  -8   0 2196.39   75.66
   2   8   0 2071.14   75.99
  -2  -8   0 2083.05   71.18
  -1  -6  -4 1000.54   35.38
  -1   6  -4 1060.85   36.07
  -1   6  -4 1052.61   39.29
   1  -6   4 1047.99   35.61
   1   6   4 1025.39   35.99
   1  -6   4 1050.64   35.19
  -2   5   4   25.36    1.58
  -2  -5   4   26.25    1.31
  -2  -5   4   25.29    1.31
   2  -5  -4   25.13    1.58
   0  -9   0   -0.10    0.58
   0  -9   0   -0.20    0.44
   0   9   0    0.11    0.50
   0   9   0    0.36    0.35
  -2   1  -5 1272.48   46.62
  -2   1  -5 1363.01   46.34
   2  -1   5 1317.84   44.61
   2   1   5 1421.07   48.15
  -2  -1  -5 1292.28   42.93
  -2  -1  -5 1283.14   48.20
   2   1   5 1137.04   37.90
   2  -1   5 1308.81   43.29
  -4   4   0  939.80   32.25
  -4  -4   0 1005.59   36.00
  -3  -2  -4   82.44    3.18
  -3  -2  -4   77.35    2.98
  -3   2  -4   80.00    2.83
   3  -2   4   78.34    2.73
   3   2   4   84.75    3.33
  -3   2  -4   85.86    2.80
   3  -6  -2   52.75    2.27
  -3   6   2   50.10    2.10
  -3  -6   2   54.16    2.02
  -2   5  -4  270.40    8.32
  -2   5  -4  281.56    7.89
   2   5   4  277.41    7.76
   2   5   4  275.26    7.95
   2  -5   4  281.00    7.90
  -2  -5  -4  276.17    7.63
  -2   8   1  180.90    6.27
  -2  -8   1  206.39    6.10
   2   8  -1  203.54    6.67
  -2  -8   1  231.90    7.12
   2  -8  -1  212.56    6.59
  -2   8   1  203.92    5.94
  -1   4   5 1185.78   34.42
  -1  -4   5 1219.96   33.60
   1   4  -5 1128.36   34.65
  -1   4   5 1191.41   38.47
  -1  -4   5 1247.05   35.08
  -2  -8  -1  608.69   17.19
   2  -8   1  585.41   15.92
   2  -8   1  570.06   15.82
  -2  -8  -1  595.24   16.33
   2   8   1  585.50   16.97
  -2   8  -1  513.17   15.12
  -2   8  -1  582.56   15.89
  -3   6  -2  318.31   10.69
   3  -6   2  333.47    9.58
  -4  -4   1  158.23    5.35
  -4   4   1  160.11    5.42
   0  -9   1 2309.11   61.01
   0   9   1 2281.29   65.06
   0  -9   1 2275.42   63.20
   0   9  -1 2405.97   67.96
   0  -9  -1 2284.88   59.53
   0   9   1 2289.30   64.52
   0   9  -1 2276.22   63.22
   0  -9  -1 2304.27   65.15
  -1  -4  -5 1231.44   35.06
  -1   4  -5 1255.02   34.68
   1  -4   5 1235.52   33.03
   1   4   5 1209.42   31.93
   1   4   5 1138.08   30.39
  -1   4  -5 1222.50   35.90
   1  -4   5 1162.05   35.65
   1   4   5 1232.38   44.59
   3  -5  -3   36.85    1.75
  -3  -5   3   36.95    1.52
  -4  -3   2  186.73    6.37
  -4   3   2  185.98    6.30
  -4   4  -1  733.47   20.13
   4  -4   1  706.51   20.07
  -4   4  -1  751.04   22.77
  -4  -4  -1  773.38   20.75
   2   2   5  856.12   22.85
  -2  -2  -5  837.02   22.18
  -2   2  -5  825.46   22.20
   2   2   5  865.71   23.43
  -2   2  -5  802.72   23.13
   2  -2   5  811.65   22.18
  -3   3   4 1228.87   38.48
   3  -3  -4 1222.69   37.40
  -3  -3   4 1217.64   40.99
  -1   9   0 1472.49   39.78
   1   9   0 1443.96   41.19
  -1  -9   0 1521.00   41.86
   1  -9   0 1514.74   42.29
   1  -9   0 1525.82   39.94
  -1   9   0 1469.60   40.13
  -1  -9   0 1491.99   40.08
  -4   3  -2 1028.29   29.44
   4  -3   2  962.01   25.99
   4   3   2 1089.71   29.02
  -4  -3  -2 1107.40   29.33
  -4   3  -2 1009.91   26.86
   3  -5   3  479.97   14.61
  -3   5  -3  524.02   14.46
  -3   5  -3  490.24   13.63
  -3  -5  -3  508.11   13.81
  -3   7   0 1439.54   38.51
   3  -7   0 1481.06   40.94
  -3  -7   0 1427.70   39.68
  -3   7   0 1486.23   41.99
   0  -8  -3  526.52   15.60
   0   8  -3  535.60   15.70
   0  -8   3  523.82   14.38
   0  -8   3  535.64   14.94
   0   8   3  528.28   14.60
  -4   0   3   -0.04    0.77
   3   3   4  215.21    6.31
  -3   3  -4  234.27    7.33
  -3   3  -4  209.43    6.02
  -3  -3  -4  198.61    6.12
  -3  -3  -4  214.50    6.13
  -2  -7   3   35.21    1.40
  -2  -7   3   34.07    1.43
   2  -7  -3   35.22    1.73
  -2   7   3   36.79    1.71
  -2  -3   5  100.97    3.35
  -2  -3   5   95.26    3.18
  -2   3   5   96.97    3.81
   1   9  -1    5.49    0.61
  -1   9   1    4.96    0.73
  -1  -9   1    5.18    0.66
   1  -9  -1    4.65    0.69
   1  -9  -1    5.27    0.73
  -1  -9   1    6.09    0.58
  -1   9   1    5.33    0.56
   1  -9   1    0.72    0.56
   1   9   1    0.31    0.54
  -1   9  -1    0.10    0.43
  -1   9  -1    0.09    0.38
  -1  -9  -1    0.42    0.59
   1  -9   1    0.72    0.42
  -1  -9  -1    1.01    0.37
  -4   1   3 3607.72  109.94
   4   1  -3 3249.31  104.60
  -4  -1   3 3472.04  107.27
  -3   7   1  265.39    7.78
  -3  -7   1  268.33    7.97
  -3   7   1  274.06    8.49
   3  -7  -1  263.23    8.45
   0  -5   5    2.64    0.53
   0   5   5    2.04    0.73
   0   5  -5    2.61    0.59
   0   5  -5    2.71    0.44
   0   5   5    2.42    0.43
   0  -5   5    2.51    0.56
  -3  -7  -1  275.00    7.86
  -3   7  -1  269.98    7.72
   3  -7   1  266.69    8.30
  -3  -7  -1  265.37   10.91
  -3   7  -1  275.87    8.16
  -2  -7  -3   42.34    1.66
   2   7   3   41.29    1.63
   2  -7   3   44.87    1.80
   2  -7   3   44.68    1.73
  -2   7  -3   44.68    1.83
  -4   0  -3    0.19    0.61
  -4   0  -3   -0.28    0.49
   4   0   3    0.12    0.52
  -2   3  -5   11.54    0.83
   2   3   5   12.01    0.86
  -2   3  -5   11.91    0.78
   2  -3   5   12.12    0.88
  -2  -3  -5   12.33    0.74
   2   3   5   11.16    0.74
   0   7   4  222.79    6.77
   0   7  -4  231.39    6.72
   0  -7  -4  215.54    7.13
   0  -7   4  249.00    7.26
   0  -7   4  218.99    6.24
  -2  -8   2  627.46   17.83
  -2   8   2  652.97   17.56
  -2  -8   2  604.39   16.80
   2  -8  -2  615.59   18.57
   2   8  -2  643.33   21.70
  -2   8   2  637.86   19.00
   4  -1   3  464.90   14.55
  -4   1  -3  517.32   15.16
   4   1   3  527.24   14.36
  -4   1  -3  513.48   13.92
  -4  -1  -3  437.96   23.99
  -4  -1  -3  499.99   13.56
  -4   5   0  310.40    9.85
  -4  -5   0  314.64    9.99
  -4   5   0  268.40    7.87
  -1  -8   3  377.76   10.81
   1   8  -3  350.12   10.47
  -1   8   3  342.35    9.47
  -1  -8   3  350.79    9.70
   1   8  -3  359.20   10.96
   1  -8  -3  332.99   10.35
  -1   8   3  340.98    9.55
  -4   4   2   76.58    3.01
  -4  -4   2   76.41    3.38
   4  -4  -2   76.98    2.93
   2  -8   2   58.36    2.12
  -2  -8  -2   56.65    2.20
   2  -8   2   56.19    2.09
  -2   8  -2   56.22    2.00
  -2   8  -2   54.98    2.13
   2   8   2   55.71    2.05
   0   0   6   72.76    2.77
   0   0  -6   68.00    2.53
   4  -2  -3  111.38    5.02
  -4   2   3  119.87    4.18
  -4  -2   3  120.10    4.26
  -1   8  -3 1913.42   51.87
  -1  -8  -3 1906.64   57.02
   1  -8   3 1959.45   55.85
   1  -8   3 1957.39   51.42
   1   8   3 1932.64   53.78
  -1   8  -3 1953.35   52.83
   0  -9   2  130.39    4.14
   0   9   2  129.66    4.19
   0   9  -2  122.02    3.95
   0   9   2  133.49    4.01
   0  -9   2  133.22    3.97
   0  -9  -2  132.63    4.49
   0   9  -2  132.08    4.09
  -1  -5   5  998.46   27.40
  -1   5   5 1008.60   33.10
   1  -5  -5  959.85   30.90
  -1   5   5  941.19   26.55
   1   5  -5 1026.40   30.83
  -1  -5   5  973.22   27.33
   0  -1   6   28.41    1.19
   0   1  -6   29.29    1.35
   0  -1  -6   31.26    1.39
   0  -1   6   29.43    1.31
   0   1   6   28.91    1.23
  -2  -6   4   71.69    2.40
  -2   6   4   71.79    2.89
  -2  -6   4   70.85    2.45
   2  -6  -4   70.11    2.93
   3  -4  -4  551.91   16.60
  -4  -4  -2 4953.28  170.20
  -4   4  -2 4479.13  131.43
  -4   4  -2 4669.38  121.26
   4   4   2 4985.48  171.33
   4  -4   2 4084.66  112.93
  -4  -5   1 1183.26   37.34
   4  -5  -1 1147.32   33.30
  -4   5   1 1180.56   34.68
   1  -5   5  137.79    4.13
  -1   5  -5  134.02    4.09
   1   5   5  130.79    4.08
   1   5   5  127.43    4.55
  -1   5  -5  133.96    4.47
  -1  -5  -5  115.81    3.84
   1  -7  -4  148.74    5.30
  -1  -7   4  156.54    4.65
  -1   7   4  156.44    5.06
  -1  -7   4  155.06    4.94
  -4   2  -3  512.98   16.57
   4   2   3  579.77   15.91
  -4  -2  -3  532.09   14.91
  -4  -2  -3  548.06   14.82
  -4   2  -3  553.93   15.05
   4  -2   3  512.08   14.82
  -4  -5  -1  908.34   26.52
  -4   5  -1  914.95   27.48
  -2   6  -4 1615.13   43.98
  -2  -6  -4 1665.20   43.37
  -2   6  -4 1613.40   45.43
   2  -6   4 1657.24   44.33
   2   6   4 1531.92   41.31
   2   6   4 1621.49   43.70
   1  -7   4    4.97    0.71
   1   7   4    4.25    0.65
  -1  -7  -4    4.56    0.78
  -1   7  -4    4.81    0.63
   1  -7   4    4.57    0.59
   3  -4   4  119.77    3.76
  -3   4  -4  125.33    3.85
   3   4   4  119.84    4.25
  -3   4  -4  138.35    4.38
   3  -4   4  129.79    4.06
  -3  -4  -4  124.77    3.81
  -1   0   6 1558.01   41.62
  -2  -4   5   23.43    1.17
  -2   4   5   23.61    1.44
   2  -4  -5   22.68    1.40
  -2  -4   5   23.32    1.06
   3  -6  -3    2.30    0.74
  -3  -6   3    1.94    0.48
  -3  -6   3    2.20    0.46
   0   2   6    8.75    0.63
   0  -2   6    8.84    0.65
   0  -2  -6    8.89    0.70
   0   2  -6    9.44    0.70
   0   2   6    8.90    1.02
   0   2   6   10.50    0.76
   0  -2   6    9.42    0.71
   1   9  -2   61.44    2.33
  -1  -9   2   59.53    2.01
  -1   9   2   61.07    2.09
   1  -9  -2   61.41    2.42
  -1  -9   2   55.90    2.00
  -1   9   2   61.73    2.40
   1   9  -2   59.04    2.24
  -3  -7   2  846.29   22.40
  -3  -7   2  847.79   23.80
   3  -7  -2  854.28   23.85
   1  -9   2   10.92    0.84
  -1  -9  -2    9.57    0.85
  -1   9  -2    9.88    0.70
   1  -9   2    9.90    0.78
   1   9   2    9.52    0.75
  -1  -9  -2    9.84    0.80
   1   0   6 2219.03   66.15
  -1   0  -6 2323.50   64.49
   4  -3  -3  376.36   13.43
  -4   3   3  373.49   11.64
  -4  -3   3  378.80   12.24
  -3   6  -3  473.26   14.04
   3  -6   3  503.54   13.82
  -3  -6  -3  503.08   13.74
   2   4   5  101.47    3.34
  -2   4  -5  100.78    3.46
   2  -4   5   97.62    3.15
   2   4   5   99.42    3.86
  -2   4  -5  103.90    3.25
  -2  -4  -5  100.90    3.08
   2   4   5   94.85    3.14
  -3   7  -2 1064.12   28.35
   3  -7   2 1118.76   30.02
   3  -7   2 1085.57   30.26
  -3   7  -2 1005.20   26.89
   1   1   6  221.64    6.67
  -1   1  -6  216.59    6.47
   1  -1   6  222.62    6.43
   1   1   6  233.09    6.71
  -1  -1  -6  223.59    6.64
   2   9   0   33.03    1.46
   2  -9   0   32.80    1.56
  -2  -9   0   32.78    1.29
  -2   9   0   31.37    1.33
   2  -9   0   33.09    1.56
  -2  -9   0   32.80    1.45
  -4  -3  -3   24.54    1.19
   4   3   3   27.32    1.40
  -4  -3  -3   25.36    1.29
  -4   3  -3   25.72    1.26
  -4   3  -3   25.67    1.31
  -1   2   6  308.15    8.85
  -1   2   6  311.84   10.45
  -1  -2   6  315.25    9.07
  -3   0   5    0.52    0.67
   0  -6   5    6.56    0.65
   0  -6   5    6.36    0.59
   0   6  -5    6.17    0.61
   0   6   5    6.14    0.55
   0   6   5    6.27    0.85
   0   6  -5    6.28    0.68
   1   2   6 1228.50   35.07
   1  -2   6 1151.47   34.34
   1  -2   6 1212.45   42.10
  -1  -2  -6 1202.44   42.79
   1   2   6 1191.59   41.66
  -1   2  -6 1181.96   44.05
  -1   2  -6 1231.52   34.65
  -3  -1   5 1053.00   38.60
  -3   1   5 1013.29   39.52
   2  -9  -1   48.51    2.26
  -2   9   1   48.07    2.10
   2   9  -1   50.68    2.34
  -2  -9   1   48.98    2.06
  -2   9   1   47.20    2.26
  -2  -9   1   48.56    2.14
  -4  -5   2   25.51    1.66
  -4   5   2   25.35    1.56
   4  -5  -2   25.74    1.57
   0  -3   6   15.98    0.92
   0   3   6   20.65    1.08
   0   3   6   20.14    1.44
   0   3  -6   20.23    1.19
   0  -3   6   19.21    1.15
   0 -10   0   57.04    2.37
   0  10   0   57.08    2.39
   0 -10   0   57.66    2.51
   0  10   0   55.50    2.41
  -2   9  -1  136.03    5.14
   2  -9   1  134.52    5.18
   2  -9   1  143.07    5.45
  -2  -9  -1  137.35    5.12
   2   9   1  139.40    5.57
  -2  -9  -1  145.81    5.64
   3  -8   0   51.62    2.36
  -3   8   0   52.79    2.33
  -3   8   0   52.62    2.31
  -3  -8   0   54.16    2.33
  -3  -5   4   16.17    1.07
  -3  -5   4   15.42    1.03
   3  -5  -4   16.22    1.22
  -4   5  -2  495.17   18.35
  -4   5  -2  493.92   17.76
   4  -5   2  468.93   17.24
  -4  -5  -2  559.19   19.79
  -3   0  -5   -0.13    0.43
  -3   0  -5    0.29    0.50
   3   0   5   -0.08    0.43
   3   0   5    1.96    0.70
  -4  -6   0  280.16   10.71
  -4  -6   0  266.95   10.67
   4  -6   0  265.17   10.68
  -4   6   0  254.23    9.58
  -4   6   0  285.94   10.57
  -5   0   0   51.68    2.41
   5   0   0   49.40    2.39
   3   1   5   -0.57    0.39
   3   1   5    4.66    0.61
  -3   1  -5    4.92    0.61
  -3  -1  -5    4.62    0.57
  -3  -1  -5    5.12    0.62
  -3   1  -5    5.12    0.64
   3  -1   5    4.31    0.62
   3  -1   5    4.82    0.67
  -3  -2   5  499.64   22.82
  -3   2   5  433.06   20.63
  -2   8   3  262.24    9.58
   2  -8  -3  269.87    9.99
  -2  -8   3  260.02    9.50
  -2   8   3  261.52    9.54
  -2  -8   3  255.55    9.68
   2   8  -3  257.91    9.28
   0  10  -1  986.37   35.73
   0  10  -1  938.32   34.19
   0 -10  -1  936.63   32.46
   0 -10  -1  970.66   34.67
   0  10   1  969.60   34.33
   0 -10   1  926.60   32.85
   0 -10   1  979.35   34.30
   0  10   1  942.46   33.54
   1  -6  -5   93.31    4.23
  -1   6   5   93.52    4.21
  -1   6   5   92.01    3.67
  -1  -6   5   92.59    3.59
  -1  -6   5   91.27    3.75
   1   6  -5   96.19    3.93
   4  -4  -3 1757.59   69.24
  -4  -4   3 1901.15   82.30
  -4   4   3 1868.86   65.83
  -3  -8   1   91.42    3.60
   3  -8  -1   90.64    3.88
  -3   8   1   91.01    3.69
   5   1   0   19.30    1.30
  -5  -1   0   21.08    1.35
  -5   1   0   19.63    1.28
  -3   5  -4   28.18    1.50
  -3  -5  -4   26.78    1.37
  -3   5  -4   28.17    1.38
   3  -5   4   27.32    1.44
   3  -5   4   24.96    1.35
   1   3  -6  289.79   10.84
  -1   3   6  272.39   11.21
  -1   3   6  278.64   10.11
  -2  -5   5  631.81   22.62
  -2   5   5  638.44   24.49
   2  -5  -5  645.66   24.24
  -2  -5   5  646.92   23.04
  -4  -6   1    0.66    0.36
  -4   6   1    0.53    0.65
   4  -6  -1    0.54    0.59
  -4   6   1    0.79    0.79
  -4  -6   1    0.46    0.55
  -3   8  -1   32.93    1.60
  -3   8  -1   35.46    1.78
   3  -8   1   32.03    1.65
  -3  -8  -1   33.89    1.64
   2  -8   3  169.75    6.53
  -2   8  -3  153.65    5.72
   2  -8   3  165.46    6.21
  -2  -8  -3  163.96    6.13
  -2  -8  -3  154.61    6.01
   2   8   3  160.91    5.96
  -2   8  -3  174.23    6.71
   1   6   5 1260.12   43.90
   1  -6   5 1344.51   46.61
  -1  -6  -5 1281.05   48.95
  -1   6  -5 1325.89   47.46
  -1   6  -5 1331.15   51.78
   1   6   5 1279.09   48.28
   0  -9   3   -0.19    0.57
   0  -9   3    0.17    0.48
   0   9  -3    0.04    0.40
   0  -9  -3    0.13    0.57
   0   9   3    0.57    0.52
  -1  10   0  643.01   22.87
  -1 -10   0  668.34   24.34
  -1 -10   0  641.84   22.44
   1 -10   0  661.05   23.39
   1 -10   0  659.48   23.05
  -1  10   0  651.55   23.68
   1  10   0  619.43   22.68
   5   0  -1   -0.90    0.64
  -5   0   1    0.23    0.70
  -4  -6  -1  194.85    7.14
  -4   6  -1  175.09    6.93
  -4  -6  -1  190.06    7.33
  -4   6  -1  144.29    5.58
  -4   0   4   90.57    4.03
   0   8  -4  727.18   27.07
   0   8   4  834.91   30.95
   0  -8   4  834.71   29.35
   0  -8  -4  809.64   30.74
   0  -8   4  870.83   31.08
   1   3   6   45.60    2.01
  -1   3  -6   44.63    1.91
   1  -3   6   42.76    1.91
  -1   3  -6   46.08    2.23
   1   3   6   43.95    2.02
  -1  -3  -6   45.35    1.98
   1  -3   6   44.07    1.98
   1   3   6   42.73    2.37
  -2  -7   4 1316.98   46.90
  -2   7   4 1352.24   50.19
  -2  -7   4 1289.39   45.26
   2  -7  -4 1220.07   46.01
  -5   0  -1    0.07    0.44
   5   0   1   -0.05    0.62
  -4   4  -3  628.40   23.06
   4  -4   3  572.45   20.77
  -4  -4  -3  613.70   21.88
  -4   4  -3  656.11   23.07
   4   4   3  704.87   24.74
  -4  -4  -3  655.68   23.09
   5   1  -1   -0.84    0.54
  -3   2  -5 2456.96   85.58
   3   2   5 2471.57   85.10
   3  -2   5 2351.69   81.39
  -3   2  -5 2249.24   84.07
  -3  -2  -5 2170.02   88.07
   3   2   5 2096.02  103.27
   3  -2   5 2309.00   82.91
  -3  -2  -5 2442.74   83.93
  -4   1   4    0.21    0.62
   4  -1  -4    0.30    0.67
  -4  -1   4    0.63    0.80
  -2  -5  -5  353.57   12.58
   2  -5   5  436.57   15.49
  -2   5  -5  415.82   14.90
   2  -5   5  393.41   14.13
  -2   5  -5  387.41   14.44
   2   5   5  396.42   15.13
   2   5   5  402.24   15.50
  -2   0   6   85.88    3.44
   5  -1   1  127.25    5.11
  -5   1  -1  124.10    4.88
   5   1   1  130.03    5.18
  -5  -1  -1  130.99    5.03
   5  -2   0   79.75    3.41
  -5  -2   0   80.57    3.52
   5   2   0   86.51    3.78
  -5   2   0   84.09    3.55
   2   7   4   95.10    3.82
   2  -7   4   95.96    3.77
  -2  -7  -4   95.96    3.66
  -2   7  -4   90.56    3.63
  -1 -10   1   48.99    2.14
   1  10  -1   49.85    2.22
  -1 -10   1   49.07    2.06
  -1  10   1   50.02    2.25
   1 -10  -1   50.57    2.34
  -1  10   1   46.18    2.01
   1 -10  -1   50.15    2.29
   1 -10   1  428.61   15.19
  -1 -10  -1  450.24   16.55
   1 -10   1  420.53   15.43
  -1  10  -1  429.01   15.50
  -1 -10  -1  422.18   14.93
  -1  10  -1  404.36   14.35
   1  10   1  487.06   18.28
   0   4  -6  919.75   35.21
   0   4   6  867.05   30.79
   0   4   6  886.65   33.78
   2   9  -2   86.82    3.67
  -2  -9   2   84.10    3.29
  -2   9   2   91.41    3.85
  -2  -9   2   97.33    3.86
   2  -9  -2   90.46    3.70
  -2   9   2   90.23    3.58
  -2  -1   6  110.75    4.29
  -4   0  -4   34.61    1.69
   4   0   4   32.93    1.64
  -4   0  -4   31.67    1.74
   3  -3  -5  498.08   19.13
  -3  -3   5  496.39   18.12
  -3  -3   5  512.67   24.74
  -1   9   3  719.62   25.43
   1   9  -3  724.05   27.24
  -1  -9   3  726.80   25.53
   1  -9  -3  697.84   25.95
   1   9  -3  749.05   27.97
  -1   9   3  717.98   24.97
  -1  -9   3  718.34   25.41
  -3  -7   3  198.71    7.45
   3  -7  -3  205.84    8.24
  -3  -7   3  199.25    7.50
  -2   9  -2   87.21    3.42
  -2   9  -2   89.34    3.70
   2  -9   2   91.50    3.70
  -2  -9  -2   94.92    3.91
   2  -9   2   90.62    3.64
   2   9   2   90.04    3.70
  -2  -9  -2   90.30    3.50
   1  -9   3  297.46   10.88
   1   9   3  292.95   10.94
  -1   9  -3  290.44   10.46
  -1  -9  -3  264.64   10.63
   1  -9   3  302.02   10.87
  -1   8   4  207.84    8.27
   1  -8  -4  196.88    7.85
   1   8  -4  205.00    8.04
  -1  -8   4  209.13    7.65
  -1  -8   4  217.65    8.18
   5   2  -1  326.09   12.72
  -5  -2   1  319.99   12.56
  -5   2   1  329.93   13.61
   5  -2  -1  315.58   12.92
   4   1   4  164.16    6.16
  -4   1  -4  159.75    5.95
  -4   1  -4  156.34    6.19
  -4  -1  -4  187.16    7.09
  -4  -1  -4  160.54    5.96
   4  -1   4  158.49    5.94
  -4  -2   4  101.99    5.06
   4  -2  -4  109.45    4.67
  -4   2   4  113.11    5.08
  -2   0  -6  332.62   13.31
  -2   0  -6  345.99   12.37
   2   0   6  337.96   12.26
   1  -8   4    7.97    0.84
   1   8   4    7.93    0.78
   1  -8   4    7.78    0.72
  -1  -8  -4    7.51    0.88
  -1   8  -4    7.50    0.75
  -5  -2  -1   26.10    1.42
  -5   2  -1   24.91    1.45
   5   2   1   25.85    1.52
  -2   1  -6  205.80    8.29
   2   1   6  209.01    7.77
   2  -1   6  230.07    8.55
   2   1   6  208.67    7.63
  -2  -1  -6  208.63    7.65
  -2   1  -6  222.77    8.11
   2  -1   6  205.14    7.50
  -3   7  -3  216.95    8.24
   3  -7   3  221.81    8.15
  -3  -7  -3  218.08    8.08
  -2  -2   6   64.64    2.66
  -2   2   6   51.66    2.28
  -2   2   6   61.76    3.18
  -2  -2   6   64.29    2.73
   0 -10   2 2980.93  104.48
   0 -10   2 3083.53   75.07
   0 -10  -2 3154.56   84.97
   0  10   2 3085.97   79.30
   0  10  -2 2890.66  106.93
   0  10  -2 3036.41  107.41
   3   3   5  692.60   24.66
  -3   3  -5  764.05   27.11
  -3  -3  -5  731.72   25.44
  -3   3  -5  674.73   25.95
   3  -8  -2   54.82    2.62
  -3  -8   2   56.62    2.39
  -3  -8   2   59.21    2.51
  -3   8   2   57.82    2.56
  -1  -4   6   61.23    2.75
  -1   4   6   60.21    2.89
   1   4  -6   62.36    2.68
  -1   4   6   58.35    2.40
  -4  -6   2 1526.67   64.40
   4  -6  -2 1504.03   56.57
  -4  -6   2 1391.70   50.21
  -4   6   2 1498.92   57.00
   5   3   0  479.37   17.44
  -5  -3   0  468.07   17.70
   5  -3   0  460.38   16.80
  -5   3   0  467.40   17.88
  -4  -2  -4  290.51   10.69
  -4   2  -4  282.48   10.18
   4  -2   4  278.55   10.07
   4   2   4  296.10   10.99
  -4  -2  -4  267.05    9.62
  -4   2  -4  281.26   10.59
  -5   0   2  560.48   20.79
   5   0  -2  552.12   20.93
  -3   8  -2  223.76    8.23
  -3  -8  -2  221.98    6.15
  -3  -8  -2  217.69    8.42
   3  -8   2  229.14    8.54
   3  -8   2  227.48    8.45
  -3   8  -2  219.69    8.01
   1  -4   6 1022.93   36.73
   1   4   6  971.56   35.84
  -1   4  -6 1017.90   38.34
   1   4   6  976.50   41.85
   1   4   6  982.45   34.44
  -1   4  -6 1026.40   37.26
  -1  -4  -6  998.57   36.68
  -4  -5   3 1355.40   44.73
   4  -5  -3 1311.32   34.23
  -4   5   3 1351.60   37.93
  -3   6   4  914.16   29.40
  -3  -6   4 1033.16   27.93
  -3  -6   4 1046.51   27.26
   3  -6  -4 1005.16   31.94
   0  -7  -5  716.77   22.75
   0   7   5  771.50   19.16
   0   7   5  754.43   18.23
   0  -7   5  843.89   21.45
   0   7  -5  782.31   23.98
   0   7  -5  678.99   19.70
   0  -7   5  744.30   18.52
  -4   6  -2  127.79    3.79
  -4  -6  -2  119.99    3.70
   4  -6   2  122.48    3.97
  -4  -6  -2  145.77    4.29
  -2   2  -6   14.88    0.80
  -2  -2  -6   18.96    0.90
   2   2   6   14.20    0.82
   2  -2   6   14.33    0.91
  -2   2  -6   13.72    0.91
   2   2   6   14.90    0.93
   5  -1  -2   56.65    2.47
  -5  -1   2   58.27    2.25
   5   1  -2   58.51    2.40
  -5   1   2   55.81    2.16
   5   0   2  364.81    9.55
  -5   0  -2  363.72    9.37
  -5   0  -2  381.98    9.68
   5   3  -1  176.55    6.61
   5  -3  -1  181.55    5.75
  -5  -3   1  177.42    5.49
  -5   3   1  176.48    5.65
  -4   3   4   75.69    2.91
  -4  -3   4   81.52    3.66
   4  -3  -4   78.08    3.19
   1 -10  -2  325.18    8.93
   1  10  -2  335.34    9.48
  -1 -10   2  316.43    8.17
   1  10  -2  320.85    8.99
  -1  10   2  326.81    8.92
  -1  10   2  319.84    8.10
  -1 -10   2  310.39    8.26
  -5   3  -1   11.52    0.99
  -5   3  -1   10.53    0.88
   5  -3   1   10.46    0.90
   5   3   1   11.13    0.97
  -5  -3  -1   10.94    0.88
  -5  -1  -2  421.77   10.68
   5  -1   2  386.03   10.47
  -5   1  -2  395.33   10.10
  -5   1  -2  420.58   10.78
   5   1   2  410.63   10.96
  -4   5  -3   31.97    1.40
  -4  -5  -3   29.82    1.38
  -4   5  -3   32.46    1.46
   4  -5   3   28.65    1.33
   3  -6   4   77.45    2.54
  -3  -6  -4   81.94    2.53
  -3   6  -4   89.63    3.00
   3  -6   4   85.14    2.70
  -3   6  -4   83.66    2.59
  -1 -10  -2  896.76   21.56
   1 -10   2  959.33   23.53
  -1 -10  -2  965.15   23.83
   1 -10   2  938.22   24.24
  -1  10  -2  971.45   24.66
   1  10   2  947.34   24.15
  -1  10  -2  964.30   24.10
  -4   7   0  774.87   19.37
   4  -7   0  786.29   21.73
  -4  -7   0  718.56   17.96
  -4   7   0  781.63   22.89
  -4  -7   0  760.04   22.39
  -3  -4   5  213.01    5.99
  -3  -4   5  219.53    6.15
   3  -4  -5  227.38    8.27
  -2  -6   5  463.48   12.50
   2  -6  -5  461.11   13.41
  -2   6   5  480.15   12.32
  -2  -6   5  473.55   12.02
  -2   3   6   92.13    2.92
  -2  -3   6   89.63    3.10
  -2   3   6   88.73    3.32
   5  -2  -2  142.84    5.15
  -5  -2   2  149.32    4.79
  -5   2   2  155.83    5.20
  -1  -7   5  482.73   12.21
  -1   7   5  454.02   11.92
   1  -7  -5  464.77   15.80
  -1   7   5  466.04   12.68
   1   7  -5  440.46   15.27
  -1  -7   5  465.17   12.73
   0   5   6  641.33   20.77
   0   5  -6  669.98   17.28
   0   5  -6  664.28   16.91
   0  -5   6  666.96   16.67
   0   5   6  634.02   15.71
  -2  -6  -5   41.72    1.44
   2  -6   5   39.53    1.59
   2  -6   5   42.43    1.60
  -2   6  -5   41.77    1.54
   2   6   5   40.56    1.56
  -2   6  -5   40.02    1.58
   2   6   5   40.59    1.73
  -2 -10   0 1407.15   35.20
  -2  10   0 1473.95   35.46
   2 -10   0 1462.35   35.10
  -2  10   0 1431.67   36.56
   2  10   0 1450.60   38.21
  -2 -10   0 1412.54   36.96
   2 -10   0 1441.75   37.16
  -4  -7   1   73.66    2.45
  -4  -7   1   77.44    3.18
  -4   7   1   74.10    2.56
  -4   7   1   75.77    2.62
   4  -7  -1   74.94    2.79
   1   7   5   76.78    2.99
  -1   7  -5   84.15    2.61
   1  -7   5   85.56    2.78
   1  -7   5   87.39    2.64
  -1   7  -5   83.02    2.59
  -5   2  -2    3.18    0.64
   5   2   2    2.81    0.61
   5  -2   2    3.07    0.60
  -5  -2  -2    3.32    0.59
  -5   2  -2    3.14    0.67
  -3   4  -5  285.68    8.32
   3   4   5  274.18   12.06
   3  -4   5  289.10    7.61
  -3  -4  -5  298.50    7.61
  -3   4  -5  308.74    8.02
  -4   7  -1  955.98   26.72
  -4  -7  -1  959.61   23.30
  -4  -7  -1  944.04   27.84
  -4   7  -1  908.07   22.34
   2   3   6  413.97   12.64
   2  -3   6  421.52   11.20
   2  -3   6  411.39   10.46
  -2   3  -6  435.85   12.51
  -2  -3  -6  443.60   11.16
  -2   3  -6  447.61   11.51
   2   3   6  432.79   10.92
   3  -9   0  506.02   13.16
  -3  -9   0  498.29   13.19
  -3   9   0  490.76   12.22
  -3  -9   0  515.81   13.47
  -5   4   0   18.40    1.13
   5  -4   0   16.61    1.08
  -5  -4   0   17.49    1.09
   2 -10  -1  569.43   14.80
  -2  10   1  540.29   14.39
   2  10  -1  570.35   15.58
  -2 -10   1  560.37   14.09
  -2  10   1  568.03   13.90
  -2 -10   1  553.72   14.21
  -2 -10  -1  213.21    6.05
  -2  10  -1  194.82    5.22
   2 -10   1  206.78    5.62
   2 -10   1  192.87    5.56
  -2 -10  -1  193.58    5.19
   2  10   1  197.98    5.86
  -1  -5   6   73.87    2.29
  -1  -5   6   74.12    2.44
  -1   5   6   66.17    2.18
  -1   5   6   72.56    2.85
   1   5  -6   75.35    2.66
   2  -9  -3  982.87   24.98
  -2  -9   3  994.17   25.45
  -2   9   3  994.93   26.30
   2   9  -3  987.62   26.75
  -2   9   3  923.57   23.24
  -2  -9   3  989.60   24.86
  -2  -8   4   44.75    1.59
   2  -8  -4   43.22    1.94
  -2  -8   4   44.00    1.54
  -2   8   4   46.34    1.91
  -3   9   1    7.44    0.75
  -3  -9   1    8.39    0.68
  -3  -9   1    8.36    0.66
   3  -9  -1    7.71    0.87
  -5   4   1   50.19    2.03
   5  -4  -1   48.71    2.00
  -5  -4   1   50.17    2.30
  -4  -4   4 2264.07   93.27
  -4   4   4 2201.76   56.77
   4  -4  -4 2164.14   69.05
  -5   3   2  219.11    6.31
  -5  -3   2  209.96    6.47
   5  -3  -2  202.59    6.16
   1  -5   6   88.10    2.73
  -1   5  -6   91.98    2.80
   1   5   6   82.73    2.55
   1   5   6   86.39    3.27
   1   5   6   90.98    2.79
  -1   5  -6   86.16    2.69
  -1  -5  -6   86.39    2.86
   1  -5   6  103.84    3.32
   3  -9   1   94.99    3.03
  -3   9  -1   99.08    2.97
  -3  -9  -1  105.43    3.30
  -3   9  -1  100.80    3.20
   3  -9   1   94.67    3.09
   2  -9   3  663.69   16.46
  -2   9  -3  623.80   15.44
  -2  -9  -3  577.14   14.10
  -2  -9  -3  663.04   18.06
   2  -9   3  689.32   18.04
  -2   9  -3  726.86   19.26
   2   9   3  663.33   16.80
  -2  -9  -3  714.23   17.51
   0  11   0   -0.20    0.42
   0 -11   0    0.12    0.42
   0  11   0    0.22    0.36
   0 -11   0    0.15    0.51
   5  -4   1  243.20    6.76
   5   4   1  260.17    7.68
  -5   4  -1  262.08    7.09
  -5  -4  -1  275.34    7.29
  -5   4  -1  246.26    6.90
   0   9  -4  659.79   17.64
   0  -9   4  655.10   16.10
   0  -9   4  660.15   16.24
   0  -9  -4  628.08   17.93
   0   9   4  639.04   17.04
  -2   8  -4  292.26    8.59
   2  -8   4  296.23    7.71
  -2  -8  -4  297.27    7.68
   2  -8   4  305.59    8.11
   2   8   4  297.22    7.66
  -2   4   6   72.39    2.80
  -2  -4   6   73.98    2.40
  -2   4   6   72.44    2.42
  -5  -3  -2   51.75    1.92
  -5   3  -2   46.13    1.80
   5   3   2   50.65    2.00
  -5   3  -2   47.01    1.88
   3  -8  -3  403.87   11.63
  -3  -8   3  386.37   10.09
  -3   8   3  386.19   10.14
  -3  -8   3  380.29   10.13
   0 -10  -3 1288.03   35.81
   0 -10   3 1297.15   32.29
   0  10   3 1300.07   34.54
   0  10  -3 1289.26   33.19
   0  10  -3 1241.50   30.05
   0 -10   3 1303.51   31.44
  -4   6   3  152.86    5.03
  -4  -6   3  146.21    4.77
   4  -6  -3  150.46    5.07
  -4  -6   3  149.00    5.77
   4   4   4  954.68   23.20
   4  -4   4  773.47   19.69
  -4   4  -4  877.46   22.88
  -4  -4  -4  899.72   21.77
  -4   4  -4  890.26   22.20
   4  -4   4  893.82   22.17
  -4  -4  -4  884.75   21.66
  -5   0   3   -0.04    0.64
   5   0  -3    0.34    0.76
  -3  -5   5   24.31    1.14
  -3   5   5   24.18    1.44
   3  -5  -5   26.21    1.48
  -3  -5   5   25.02    1.09
   0  11  -1  112.11    3.51
   0 -11  -1  108.09    3.58
   0  11   1  104.61    3.22
   0 -11   1  108.74    3.11
   0  11   1  110.94    3.29
   0  11  -1  107.85    3.30
   0 -11   1  108.87    3.31
   0 -11  -1  104.70    3.09
   0   0  -7    0.06    0.46
   0   0   7    1.39    0.51
  -4   7   2  338.94    8.87
   4  -7  -2  319.11   10.03
  -4  -7   2  324.31   10.64
  -4  -7   2  327.84    9.24
   2  -4   6  197.14    5.38
   2   4   6  193.78    5.44
  -2   4  -6  209.14    6.26
   2   4   6  205.69    7.52
  -2   4  -6  210.19    5.70
   2   4   6  208.33    5.68
  -2  -4  -6  211.48    5.60
   3  -8   3   23.19    1.24
  -3  -8  -3   23.14    1.19
  -3   8  -3   24.24    1.17
   3  -8   3   25.38    1.29
  -3   8  -3   23.30    1.10
  -5   1   3   22.00    1.40
  -5  -1   3   22.40    1.37
   5  -1  -3   20.45    1.35
   5   1  -3   20.38    1.41
   0   1  -7  403.08   12.74
   0   1   7  388.55    9.93
   0  -1   7  407.52   11.02
   0  -1  -7  413.97   12.02
   0  -1   7  403.80   10.31
  -3  -7   4  133.08    3.87
   3  -7  -4  123.43    3.88
  -3   7   4  133.70    4.06
  -3  -7   4  131.35    3.94
   1  11   0   74.93    2.50
   1 -11   0   73.83    2.42
  -1 -11   0   78.49    2.63
  -1  11   0   76.80    2.56
  -1  11   0   76.17    2.38
  -1 -11   0   74.21    2.25
   1 -11   0   75.93    2.45
  -1  -9   4  263.69    6.86
   1   9  -4  277.95    8.04
  -1  -9   4  304.31    8.36
  -1   9   4  263.60    6.85
  -1   9   4  260.03    6.95
   1  -9  -4  265.93    7.50
   1   9  -4  262.59    7.16
   4  -6   3   83.33    2.72
  -4   6  -3   91.31    3.01
  -4  -6  -3   85.70    2.83
   4  -6   3   87.63    2.91
  -4   6  -3   86.98    2.73
  -4   7  -2  386.79   10.17
  -4  -7  -2  339.20   14.03
  -4   7  -2  450.45   11.52
  -1   9  -4    0.56    0.41
  -1  -9  -4    0.73    0.61
   1  -9   4    0.78    0.49
  -1   9  -4    0.86    0.60
   1   9   4    1.00    0.45
   1  -9   4    0.36    0.47
  -3   0   6   60.31    2.80
  -3   0   6   65.09    3.21
   2  10  -2  235.61   10.49
  -2  10   2  234.23    9.62
  -2 -10   2  230.87    9.50
   2 -10  -2  235.86   10.08
  -2  10   2  236.71   10.24
  -2 -10   2  236.02    9.84
  -5   0  -3    0.36    0.50
   5   0   3    0.20    0.52
  -5   0  -3    0.02    0.52
   3  -5   5   47.34    2.32
  -3  -5  -5   44.73    2.11
  -3   5  -5   47.43    2.25
   3   5   5   45.28    2.33
  -3   5  -5   45.18    1.72
   3  -5   5   43.70    2.17
   3   5   5   42.97    2.26
  -1 -10   3   14.26    0.92
   1  10  -3   14.38    1.01
  -1  10   3   14.20    1.07
   1 -10  -3   14.82    1.15
   1  10  -3   15.24    1.08
  -1  10   3   14.64    0.91
  -1 -10   3   13.77    0.96
  -4   0   5    0.08    0.75
   2 -10   2  342.73   13.95
  -2  10  -2  313.91   12.79
  -2 -10  -2  317.65   12.91
  -2 -10  -2  339.42   14.23
   2  10   2  326.92   13.62
   2 -10   2  328.53   13.66
   0   6   6  544.11   24.47
   0  -6   6  531.87   22.14
   0   6   6  507.17   20.52
   0  -6   6  550.30   22.10
   0   6  -6  554.99   22.79
   0   6  -6  561.69   25.45
  -3  -1   6  688.73   27.98
  -3  -1   6  615.63   25.32
  -3   1   6  596.18   23.96
   1  10   3 1273.23   51.43
   1 -10   3 1263.35   51.46
  -1  10  -3 1202.35   48.60
   1 -10   3 1275.70   50.80
  -1 -10  -3 1257.64   52.67
  -1   0   7    0.81    0.41
  -1   0   7    0.06    0.45
  -1   0   7   -0.21    0.59
   0  -8   5  215.05    9.13
   0   8  -5  202.29    9.06
   0  -8   5  193.49    7.99
   0  -8  -5  200.36    8.99
   0   8   5  199.75    8.48
  -5  -5   0   84.14    4.04
  -5   5   0   83.38    3.83
   5  -5   0   75.55    3.63
  -5  -1  -3   69.32    3.38
  -5   1  -3   65.56    3.20
   5  -1   3   63.80    3.04
   5   1   3   66.86    3.16
  -5  -1  -3   66.98    3.10
  -5   1  -3   64.43    3.00
   3  -7   4 2097.02   83.55
  -3  -7  -4 2000.91   79.46
  -3   7  -4 2221.28   92.03
   3  -7   4 1812.33   73.95
  -5   4   2    7.06    0.89
  -5  -4   2    6.10    0.89
  -3  -9   2  294.64   12.21
  -3   9   2  307.86   12.60
  -3  -9   2  304.40   12.57
   3  -9  -2  295.49   12.82
  -3   9   2  290.93   11.98
  -5   2   3   22.79    1.51
  -5  -2   3   22.56    1.62
  -2  -7   5    2.43    0.54
   2  -7  -5    2.33    0.80
  -2  -7   5    2.15    0.53
  -2   7   5    2.95    0.77
   1 -11  -1  939.11   37.49
  -1  11   1 1003.05   40.14
   1 -11  -1  983.31   40.19
  -1 -11   1 1005.75   40.03
  -1  11   1 1006.76   40.53
  -1 -11   1  964.18   38.64
   1  11  -1  964.10   40.03
  -4   1   5  500.15   23.05
  -4  -1   5  496.08   22.74
   0   2   7  333.76   14.05
   0   2  -7  369.21   15.39
   0   2   7  345.68   16.33
   0  -2   7  343.93   13.93
   0  -2  -7  352.00   15.58
   0  -2   7  356.65   14.76
   0   2   7  345.91   14.02
   1  11   1 2440.07  100.89
  -1 -11  -1 2352.75   93.12
   1 -11   1 2439.90  100.16
  -1  11  -1 2391.49   97.17
  -1  11  -1 2288.91   90.59
   1 -11   1 2378.15   95.98
  -1 -11  -1 2560.85  105.46
  -1  -1   7   17.28    1.08
  -1   1   7   17.93    1.38
  -1  -1   7   17.80    1.06
  -1   0  -7    0.37    0.44
   1   0   7    0.64    0.46
   3  -9   2   45.13    2.27
  -3   9  -2   40.80    2.04
   3  -9   2   41.19    2.10
  -3   9  -2   41.38    2.07
  -3  -9  -2   41.64    2.14
   5   4   2  140.00    6.18
   5  -4   2  121.90    5.44
  -5   4  -2  130.99    5.78
  -5  -4  -2  147.07    6.33
  -5   4  -2  137.01    5.90
  -5  -5   1   29.27    1.77
  -5   5   1   29.82    1.78
   4  -5  -4  244.68   11.36
  -4   5   4  250.99   11.03
  -4  -5   4  250.84   11.44
   2   7   5  283.60   11.78
   2   7   5  280.92   12.12
  -2   7  -5  299.48   12.29
   2  -7   5  295.68   12.11
  -2  -7  -5  290.54   12.84
  -2   7  -5  280.02   12.14
   1  -1   7  125.48    5.35
   1   1   7  122.52    5.21
   1   1   7  114.88    5.09
  -1  -1  -7  126.29    5.46
  -1   1  -7  126.14    5.47
  -4  -8   0   90.91    4.05
  -4  -8   0   89.19    4.44
   4  -8   0   90.12    4.20
  -4   8   0   87.69    3.94
  -4   8   0   89.61    4.05
  -3  -2   6   90.61    4.01
  -3  -2   6  104.01    5.39
  -5  -5  -1   14.43    1.06
   5  -5   1   15.24    1.19
  -5   5  -1   16.22    1.20
   5  -2   3    9.35    0.83
  -5  -2  -3   10.31    0.94
  -5  -2  -3    9.62    0.87
  -5   2  -3    9.91    0.93
   5   2   3   10.54    0.94
  -5   2  -3   10.25    0.90
   3  -1   6   23.29    1.33
  -3  -1  -6   22.55    1.23
  -3   1  -6   23.84    1.32
  -3  -1  -6   22.24    1.31
  -3   1  -6   22.51    1.34
   3   1   6   23.37    1.33
   3  -1   6   23.15    1.38
   4   0   5    0.27    0.49
  -4   0  -5   -0.04    0.45
  -4   0  -5    0.38    0.43
  -1   6   6  199.75    8.32
  -1  -6   6  219.79    9.07
  -1   6   6  211.57    9.51
  -1  -6   6  211.27    9.03
   1   6  -6  202.96    8.81
  -4   2   5   22.06    1.71
  -4  -2   5   22.56    1.59
   4  -2  -5   21.54    1.53
  -1   8   5  129.24    5.54
  -1   8   5  136.05    6.27
  -1  -8   5  134.60    5.67
   1  -8  -5  127.77    5.96
  -1  -8   5  134.62    5.82
   2  -5  -6  353.43   15.48
  -2   5   6  359.30   15.05
  -2  -5   6  361.31   14.88
  -2   5   6  382.05   17.25
  -2  -5   6  353.39   14.45
  -1   2   7 1584.02   63.84
  -1  -2   7 1556.67   64.36
  -1   2   7 1631.63   72.65
  -1  -2   7 1608.24   64.99
   0  11  -2  408.91   16.73
   0  11   2  412.18   16.92
   0 -11  -2  424.80   17.96
   0  11  -2  379.08   15.32
   0 -11   2  389.86   15.81
   0 -11   2  414.14   16.71
   4  -1   5  215.91    9.05
  -4   1  -5  219.40    9.07
  -4  -1  -5  229.73    9.66
   4  -1   5  215.51    8.96
  -4  -1  -5  218.25    9.00
   4   1   5  222.65    9.25
  -4   1  -5  181.12    7.83
  -1  -6  -6  321.67   13.63
  -1   6  -6  435.02   17.96
   1  -6   6  451.34   18.29
  -1   6  -6  438.21   17.70
   1   6   6  425.14   17.24
   1   6   6  449.23   19.53
  -4  -8   1   39.94    1.98
  -4  -8   1   38.93    2.34
  -4   8   1   41.48    2.21
   4  -8  -1   38.76    2.17
  -4   8   1   40.01    2.08
  -1   8  -5  301.89   12.36
   1  -8   5  304.75   12.43
   1  -8   5  300.31   12.55
   1   8   5  283.77   11.81
   4  -5   4  319.97   13.14
   4  -5   4  279.52   11.67
  -4   5  -4  324.11   13.49
  -4  -5  -4  314.10   12.82
  -4   5  -4  326.29   13.40
  -4   8  -1  431.96   17.52
  -4   8  -1  457.32   18.58
   4  -8   1  434.16   17.93
  -4  -8  -1  438.79   19.02
  -4  -8  -1  447.00   18.75
   1   2   7  306.50   12.86
   1  -2   7  288.22   12.03
  -1  -2  -7  306.27   12.63
  -1   2  -7  314.48   13.10
   1  -2   7  306.92   12.50
   1   2   7  307.53   12.53
  -5  -3   3  123.76    5.91
  -5   3   3  120.04    5.57
   0   3   7  216.11    8.88
   0  -3   7  217.11    8.94
   0   3   7  216.94   10.16
   0  -3   7  223.09    9.45
   0   3   7  208.85    8.63
   0   3  -7  187.43    8.36
   3  -2   6  153.59    6.50
  -3   2  -6  152.51    6.60
   3  -2   6  155.46    6.59
   3   2   6  162.80    6.90
   3   2   6  150.40    6.44
  -3  -2  -6  157.16    6.58
  -3   2  -6  159.54    6.67
  -2   5  -6  512.58   20.80
   2   5   6  485.99   19.72
  -2   5  -6  496.21   21.03
  -2  -5  -6  501.40   20.22
   2   5   6  463.09   21.61
   2  -5   6  472.41   19.18
   2   5   6  461.63   21.04
  -4  -2  -5   85.62    3.91
  -4   2  -5   85.33    3.78
   4  -2   5   77.99    3.56
   4   2   5   87.84    3.93
   4  -2   5   85.40    3.90
  -4   2  -5   83.12    3.83
  -4  -2  -5   84.66    3.73
   3  -6  -5   64.77    3.30
  -3  -6   5   66.26    3.13
  -3   6   5   66.87    3.43
  -3  -3   6  281.90   14.37
  -1  11   2   93.57    4.05
   1  11  -2   96.27    4.31
  -1 -11   2   92.71    4.11
  -1  11   2   94.47    4.21
  -1 -11   2   92.15    3.96
   1  11  -2   99.00    4.49
   1 -11  -2   97.15    4.39
  -1  11  -2   26.18    1.41
  -1 -11  -2   26.67    1.60
  -1  11  -2   28.75    1.66
   1 -11   2   25.08    1.46
   1  11   2   25.74    1.45
  -1 -11  -2   25.16    1.38
   1 -11   2   25.30    1.41
  -4   3   5    0.37    0.71
  -4  -3   5    0.10    0.74
  -4  -7   3    8.33    0.71
  -1   3   7   34.51    1.71
  -1   3   7   32.39    1.86
   1   3  -7   35.55    1.80
  -1  -3   7   30.78    1.75
  -1  -3   7   35.44    1.78
  -5   5   2  111.08    4.94
  -5  -5   2  111.58    5.78
   3 -10   0  204.79    8.86
  -3  10   0  212.81    8.79
  -3 -10   0  213.29    8.97
  -3 -10   0  216.34    9.08
  -2   9   4    0.95    0.54
  -2   9   4    1.15    0.71
   2  -9  -4    1.37    0.64
  -2  -9   4    0.96    0.47
  -2  -9   4    1.19    0.48
  -3   6  -5  117.91    5.04
   3  -6   5  108.53    4.75
  -3   6  -5  114.25    5.11
  -3  -6  -5  111.28    4.73
   2  11   0  119.14    5.30
  -2  11   0  117.44    5.09
  -2 -11   0  120.52    5.27
  -2 -11   0  114.18    4.84
  -2  11   0  116.44    4.99
   2 -11   0  116.66    5.15
   2 -11   0  119.07    5.20
  -1  -3  -7   77.07    3.48
   1   3   7   73.01    3.27
   1  -3   7   70.65    3.26
   1   3   7   73.94    3.40
   1  -3   7   71.62    3.21
  -1   3  -7   75.37    3.37
   1   3   7   68.62    3.52
  -5   6   0   23.53    1.46
  -5  -6   0   22.28    1.47
  -5   6   0   23.75    1.54
  -5   5  -2   78.92    3.59
  -5  -5  -2   81.72    3.69
   5  -5   2   74.93    3.53
  -5   5  -2   78.87    3.62
   4  -7   3  403.21   16.61
  -4   7  -3  448.76   18.70
   3   3   6  118.74    5.22
  -3   3  -6  117.18    4.99
   3   3   6  117.53    5.07
  -3   3  -6  113.87    5.09
  -3  -3  -6  116.57    4.95
   3  -3   6  115.38    5.00
   2  -9   4   83.34    3.69
  -2   9  -4   82.85    3.73
   2   9   4   81.92    3.66
  -2   9  -4   79.53    3.53
  -2 -10   3   88.39    3.82
  -2 -10   3   95.06    4.20
   2 -10  -3   86.29    3.95
   2  10  -3   90.38    4.17
  -2  10   3   87.17    3.85
  -2  10   3   88.93    3.99
  -2   0   7    0.04    0.36
  -2   0   7   -0.09    0.70
  -4   8   2  484.38   19.64
  -4  -8   2  467.64   19.34
  -4   8   2  416.16   16.99
  -3 -10   1    1.67    0.45
  -3  10   1    2.21    0.71
  -3 -10   1    1.58    0.52
  -3  10   1    1.85    0.57
   3 -10  -1    2.06    0.68
  -4   3  -5  228.22   10.04
  -4  -3  -5  225.44    9.69
  -4   3  -5  229.88    9.51
  -4  -3  -5  230.32    9.50
   4  -3   5  206.55    8.65
   4   3   5  238.68    9.88
   4  -3   5  220.64    9.34
  -5  -4   3   25.74    1.64
  -5   4   3   23.84    1.51
  -3 -10  -1    0.52    0.32
  -3  10  -1    0.71    0.44
  -3 -10  -1    0.86    0.46
   3 -10   1    0.32    0.55
   2 -10   3    0.20    0.58
  -2 -10  -3    0.34    0.39
  -2 -10  -3    0.79    0.49
   2  10   3    0.24    0.34
  -2 -10  -3    0.20    0.50
  -2  10  -3    0.46    0.57
  -2  10  -3    0.45    0.49
   0   4   7    7.42    0.63
   0  -4   7    7.01    0.66
   0   4   7    7.80    0.96
   0   4  -7    7.67    0.76
  -3   9   3    0.92    0.62
  -3  -9   3    1.00    0.49
  -3   9   3    1.15    0.60
   3  -9  -3    1.26    0.71
  -3  -9   3    1.07    0.49
   2  11  -1   25.16    1.46
  -2  11   1   24.21    1.47
  -2 -11   1   24.97    1.43
   2 -11  -1   25.38    1.56
  -2 -11   1   24.46    1.32
  -2  11   1   24.82    1.37
  -2  -1   7   18.29    1.08
  -2   1   7   19.79    1.46
   0   7   6  411.58   17.23
   0   7   6  411.37   17.38
   0   7  -6  408.83   17.70
   0   7  -6  424.88   18.53
  -3  -8   4  317.30   13.60
  -3   8   4  330.43   14.12
   3  -8  -4  324.02   14.68
  -3  -8   4  329.62   14.37
   2  11   1  699.40   29.94
   2 -11   1  679.08   28.54
   2 -11   1  716.06   29.75
  -2  11  -1  657.02   27.61
  -2 -11  -1  774.34   32.78
  -2  11  -1  680.82   28.34
  -2 -11  -1  685.75   28.55
  -4   8  -2 1085.70   44.98
  -4   8  -2 1136.04   48.58
  -5  -6   1   58.64    3.05
  -5   6   1   60.35    3.00
  -4  -6   4    0.60    0.78
  -4  -6   4    0.10    0.48
   0  10   4  263.20   11.46
   0 -10   4  266.24   11.24
   0  10  -4  264.33   11.59
   0 -10  -4  257.30   11.55
  -5   0   4   13.74    1.28
  -5  -6  -1    2.34    0.63
  -5   6  -1    2.01    0.58
   5  -6   1    2.09    0.62
  -2   0  -7    0.01    0.37
   2   0   7   -0.29    0.36
   3  -9   3   83.98    3.91
  -3   9  -3   77.27    3.55
  -3   9  -3   77.87    3.65
  -5  -1   4  486.18   23.09
  -5   1   4  490.10   21.09
   3  -4  -6   60.03    3.34
  -3   4   6   62.74    3.17
  -2   6   6  182.15    8.07
   2  -6  -6  181.15    8.96
  -2   6   6  177.94    7.82
  -5   4  -3   95.60    4.52
   5   4   3  103.22    4.79
  -5  -4  -3   92.20    4.39
  -5   4  -3   97.18    4.41
  -5  -4  -3   65.87    7.51
  -3   8  -4    1.46    0.60
  -3  -8  -4    1.19    0.44
   2  -1   7  171.78    7.51
  -2   1  -7  179.52    7.81
   2  -1   7  179.79    7.96
   2   1   7  170.54    7.50
  -2  -1  -7  174.87    7.60
   2   1   7  172.27    7.46
  -2   8   5  218.42    9.81
   2  -8  -5  204.97    9.00
  -4   4   5  218.78    9.51
  -4  -4   5  251.91   12.77
  -2   2   7  506.69   21.60
  -2  -2   7  466.69   19.63
  -2   2   7  500.44   23.43
   1   4  -7  277.53   12.49
  -1   4   7  262.14   11.27
  -1   4   7  257.83   10.96
  -4  -6  -4    2.01    0.54
   4  -6   4    1.33    0.52
  -4   6  -4    1.53    0.61
  -4   6  -4    1.48    0.51
   1  -7  -6  137.44    6.86
  -1   7   6  130.55    5.69
  -1   7   6  140.39    6.29
   1   7  -6  146.79    6.79
   0  11  -3    1.61    0.52
   0 -11   3    3.03    0.51
   0  11  -3    1.93    0.50
   0 -11  -3    1.64    0.67
   0  11   3    1.55    0.61
   0 -11   3    0.98    0.57
   0  12   0  286.99   12.40
   0 -12   0  277.54   11.99
   0  12   0  279.31   12.17
   0 -12   0  271.91   11.48
   0   9  -5  211.24    9.23
   0   9  -5  212.98    9.91
   0  -9  -5  229.89   10.80
   0   9   5  233.03   10.02
  -1 -10   4  278.37   12.02
   1  10  -4  273.11   12.26
  -1  10   4  271.66   11.43
  -1 -10   4  268.93   11.39
   1 -10  -4  267.62   11.95
  -1  10   4  270.62   11.71
   1  10  -4  283.54   12.56
  -2  -6  -6  120.08    5.34
  -2   6  -6  130.70    5.74
   2   6   6  123.47    5.92
  -2   6  -6  129.20    5.93
   2   6   6  125.71    5.67
   5   0   4  424.31   17.95
  -5   0  -4  276.61   14.06
  -5   0  -4  454.00   18.96
  -2  -8  -5 1696.43   69.87
  -2   8  -5 1726.30   73.89
   2   8   5 1611.62   73.97
   2   8   5 1744.15   72.30
  -1  -4  -7  103.04    5.52
   1  -4   7  117.61    5.25
   1   4   7  114.16    5.71
   1   4   7  117.36    5.23
  -1   4  -7  118.99    5.32
  -1   4  -7  116.05    5.21
   1   4   7  115.34    5.28
   1   7   6   74.05    3.58
  -1   7  -6   77.03    3.58
   1   7   6   74.99    3.53
  -1   7  -6   77.13    3.56
  -5   2   4  457.84   21.10
  -5  -2   4  456.75   21.05
   1 -10   4  174.30    7.53
  -1 -10  -4  167.46    7.84
   1  10   4  171.72    7.57
  -1  10  -4  170.90    7.45
   3  -4   6  251.11   10.96
  -3   4  -6  258.89   11.75
  -3  -4  -6  266.36   11.23
   3   4   6  257.55   11.29
  -3   4  -6  265.99   11.26
   2   2   7   87.24    3.97
  -2  -2  -7   92.92    4.14
   2  -2   7   92.55    4.19
  -2   2  -7   92.72    4.26
  -2   2  -7   90.50    4.21
   2   2   7   90.31    4.11
  -5   1  -4 1450.66   59.93
  -5  -1  -4 1444.66   59.42
  -5   1  -4 1456.20   62.95
   5  -1   4 1372.96   57.25
   5   1   4 1507.47   62.20
   4   4   5  775.51   32.15
  -4   4  -5  748.36   31.06
  -4  -4  -5  724.25   29.99
  -4   4  -5  784.61   34.01
  -3  10   2  174.49    7.89
  -3 -10   2  174.58    7.52
  -3 -10   2  169.43    7.35
  -3  10   2  172.88    7.49
  -4   9   0  191.07    8.27
  -4  -9   0  182.88    9.14
  -4   9   0  174.56    7.56
  -4  -9   0  183.60    8.01
   0 -12   1  315.00   13.26
   0  12   1  322.44   13.57
   0  12   1  339.25   14.61
   0 -12   1  331.21   13.87
   0  12  -1  335.23   14.37
   0 -12  -1  314.71   13.25
   0 -12  -1  339.63   14.56
   0  12  -1  323.89   13.97
  -6   0   0 2401.07  101.19
   6   0   0 2464.05  102.53
   2 -11  -2   10.99    1.04
   2  11  -2   10.50    0.86
  -2  11   2   10.47    0.78
  -2 -11   2    9.97    0.79
  -2  11   2   10.19    0.96
  -2 -11   2    9.87    0.70
  -5  -6   2   32.52    1.98
  -5   6   2   33.15    1.89
   3 -10   2   43.06    2.25
  -3 -10  -2   42.41    2.09
  -3  10  -2   42.99    2.16
  -3 -10  -2   41.85    2.21
  -3  10  -2   42.57    2.16
  -3   7   5  311.42   13.69
   3  -7  -5  288.23   13.61
  -1  11   3  188.01    8.02
   1  11  -3  200.48    9.05
   1 -11  -3  188.70    8.41
  -1  11   3  188.17    8.32
   1  11  -3  191.71    8.22
  -1 -11   3  185.91    7.94
  -1 -11   3  183.50    7.99
  -2   3   7  235.20   10.17
  -2   3   7  234.25   10.09
   1   9  -5  162.73    7.44
   1  -9  -5  151.06    7.01
  -1   9   5  155.22    7.10
  -1   9   5  150.27    6.50
   2 -11   2  138.00    6.07
  -2  11  -2  131.03    5.74
   2  11   2  131.63    5.92
  -2 -11  -2  141.83    6.38
  -2 -11  -2  131.72    5.70
   6   1   0    0.43    0.60
  -6   1   0    0.85    0.58
  -6  -1   0    0.68    0.67
   1 -11   3  479.20   20.08
  -1 -11  -3  477.03   20.81
  -1  11  -3  460.89   19.53
   1  11   3  487.92   20.67
  -1  11  -3  376.22   16.88
   1 -12   0  498.47   20.80
  -1  12   0  508.08   21.25
  -1 -12   0  490.14   20.93
   1  12   0  488.74   20.63
   1 -12   0  509.92   21.24
  -1 -12   0  518.19   21.63
  -1  12   0  515.58   21.70
   5  -2   4  184.45    8.02
  -5   2  -4  213.41    9.47
  -5   2  -4  200.85    8.62
  -5  -2  -4  168.20    7.68
   5   2   4  210.41    9.11
  -5  -2  -4  205.93    8.84
  -5   5   3  416.78   17.83
  -5  -5   3  421.80   18.98
  -4  -9   1   23.35    1.31
  -4   9   1   24.33    1.47
  -4   9   1   24.13    1.53
  -1  -9  -5   33.15    2.06
  -1   9  -5   35.34    1.92
   1   9   5   32.55    1.82
   0   5   7   19.52    1.38
   0   5   7   18.71    1.10
   0   5  -7   19.84    1.21
  -6   0   1   -0.56    0.72
  -5  -6  -2    6.41    0.71
  -5   6  -2    7.59    0.80
  -4   9  -1 1749.01   72.78
  -4  -9  -1 1771.27   75.74
  -4   9  -1 1656.03   68.53
  -4  -9  -1 1640.71   79.63
  -5  -3   4   95.07    4.97
  -5   3   4   90.40    4.46
  -6   1   1  792.14   35.24
   6   1  -1  810.02   34.30
   6  -1  -1  824.42   35.74
  -6  -1   1  824.92   35.47
  -6   0  -1    0.43    0.52
   6   0   1   -0.11    0.53
  -3   7  -5    3.80    0.65
  -3   7  -5    4.23    0.60
  -3  -7  -5    4.62    0.54
   2   3   7    6.26    0.66
  -2   3  -7    7.64    0.70
  -2  -3  -7    7.26    0.62
   2   3   7    6.58    0.61
   2  -3   7    8.36    0.78
  -2   3  -7    7.40    0.80
   1  12  -1   65.98    3.12
  -1  12   1   69.43    3.34
  -1 -12   1   64.54    3.03
   1 -12  -1   64.65    3.13
  -1 -12   1   68.75    3.15
  -1  12   1   68.33    3.14
   1 -12  -1   71.19    3.45
  -1 -12  -1  319.90   13.41
   1 -12   1  311.18   13.35
   1 -12   1  334.60   14.14
  -1 -12  -1  354.36   15.00
  -1  12  -1  323.23   13.93
   1  12   1  328.84   14.09
  -1  12  -1  328.14   13.85
  -3   5   6   65.69    3.44
  -4  -8   3   50.74    2.43
  -4  -8   3   51.99    2.56
  -6  -2   0  160.20    7.23
   6   2   0  156.89    7.35
  -6   2   0  161.08    7.20
   6  -2   0  170.67    7.79
  -5   7   0   44.08    2.31
  -5  -7   0   44.09    2.43
  -5   7   0   46.62    2.47
  -5  -7   0   42.46    2.12
  -6   1  -1   24.37    1.48
   6  -1   1   24.60    1.57
   6   1   1   25.67    1.63
  -6  -1  -1   26.05    1.57
  -5  -5  -3   48.94    2.53
   5  -5   3   44.70    2.31
  -5   5  -3   49.10    2.47
  -5   5  -3   52.05    2.59
  -4  -5   5  294.90   14.43
  -1   5   7   73.74    3.36
   1   5  -7   75.70    3.61
  -1   5   7   70.92    3.60
   6  -2  -1  254.99   11.62
  -6  -2   1  251.20   11.37
  -6   2   1  258.58   11.64
   6   2  -1  262.35   12.13
  -4   8  -3  112.73    5.03
  -4   8  -3  139.48    6.32
  -5  -7   1  115.86    5.55
  -5   7   1  126.39    5.74
  -5   7   1  117.29    5.33
  -5  -7   1  124.05    5.65
  -4  -7   4  192.77    8.51
  -5  -3  -4  485.88   20.29
  -5   3  -4  478.31   19.93
  -5  -3  -4  394.35   19.89
  -5   3  -4  404.05   18.07
   5   3   4  522.40   21.85
   5  -3   4  428.33   18.33
   1   5   7  452.81   18.96
  -1   5  -7  467.13   19.72
  -1  -5  -7  413.48   18.60
   1   5   7  450.46   21.25
   1   5   7  393.22   17.93
  -1   5  -7  453.63   20.33
  -4   0   6    2.79    0.90
   0  12   2  319.20   13.51
   0  12  -2  296.01   12.48
   0 -12   2  295.19   12.46
   0 -12   2  321.54   13.51
   0 -12  -2  341.47   14.90
   0  12  -2  316.58   13.90
  -5   7  -1    8.24    0.86
  -5   7  -1    8.36    0.92
  -5  -7  -1    7.99    0.84
  -5  -7  -1    8.09    0.68
  -6   2  -1 1040.49   44.38
   6   2   1 1125.30   47.09
  -6   2  -1 1023.42   42.90
  -6  -2  -1 1031.80   43.89
   3   5   6   39.07    2.18
  -3   5  -6   41.95    2.09
   3   5   6   39.83    2.24
  -3   5  -6   41.74    2.23
  -3  -5  -6   41.06    1.99
   3  -5   6   40.39    2.08
  -2   4   7  409.37   17.11
  -2   4   7  410.34   17.85
   0   8  -6   28.28    1.56
   0   8   6   28.36    1.52
   0   8   6   29.33    1.75
   0   8  -6   29.50    1.70
  -4   1   6   80.60    3.86
  -4  -1   6   79.12    4.19
  -2   7   6  192.08    8.28
   2  -7  -6  189.14    8.99
  -2   7   6  185.31    8.16
  -4   5  -5  966.41   41.17
   4  -5   5  871.40   36.19
  -4  -5  -5  906.96   36.85
  -4   5  -5  943.79   39.19
  -4  -9   2  235.58   10.00
  -4   9   2  238.15   10.09
  -4  -9   2  225.17    9.75
  -2 -10   4   86.13    3.80
  -2  10   4   86.03    4.06
  -2 -10   4   87.86    3.90
   2  10  -4   87.92    4.26
   2 -10  -4   87.70    4.08
  -2  10   4   85.08    4.06
  -6   0   2   41.18    2.34
   6   0  -2   41.44    2.48
  -6  -3   0  601.92   25.49
  -6   3   0  590.37   24.77
   6  -3   0  586.68   25.18
   6   3   0  608.61   26.35
  -4   7  -4   29.46    1.65
  -4   7  -4   28.82    1.57
  -4  -7  -4   28.82    1.61
  -5   4   4  152.30    6.78
  -5  -4   4  150.20    6.87
  -3  -9   4   24.68    1.37
  -3   9   4   25.72    1.65
  -6   1   2  119.75    5.58
  -6  -1   2  118.58    5.47
   6   1  -2  110.82    5.46
  -4   9  -2    8.74    0.91
  -4   9  -2    8.53    0.80
  -2   4  -7    4.18    0.58
   2  -4   7    3.12    0.55
   2   4   7    3.90    0.74
   2   4   7    3.93    0.62
  -2   4  -7    3.55    0.60
   2   4   7    3.51    0.50
  -2  -4  -7    4.33    0.52
  -2  -7  -6  146.37    6.26
  -2   7  -6  158.47    6.82
   2   7   6  139.74    6.24
  -2   7  -6  151.07    6.53
   2   7   6  146.79    6.95
  -2  10  -4    7.39    0.68
  -2  10  -4    6.89    0.82
   2  10   4    7.21    0.69
  -3 -11   0   59.15    2.73
  -3 -11   0   62.55    2.99
  -3  11   0   59.50    2.78
  -4   2   6    3.01    0.91
  -4  -2   6    2.13    0.80
  -1 -12   2  244.54   10.19
   1 -12  -2  263.51   11.41
  -1 -12   2  241.12   10.10
   1  12  -2  248.61   10.40
  -1  12   2  251.88   10.67
  -1  12   2  243.74   10.21
  -6  -3   1  153.08    6.99
   6   3  -1  146.18    6.78
  -6   3   1  150.10    6.72
   6   0   2  195.31    8.44
  -6   0  -2  216.83    9.25
  -6   0  -2  196.42    8.51
  -1  12  -2  215.32    9.29
   1  12   2  207.13    8.77
  -1 -12  -2  219.70    9.46
   1 -12   2  210.37    8.87
  -1  12  -2  200.15    8.63
  -1   8   6   15.08    0.92
   1  -8  -6   15.84    1.24
  -1   8   6   15.28    1.24
   1   8  -6   15.66    1.07
  -4   0  -6   15.96    1.03
  -4   0  -6   16.17    1.08
   4   0   6   14.97    1.11
   4   0   6   13.91    0.97
  -3  10   3   32.32    1.78
  -3 -10   3   29.27    1.53
  -3  10   3   34.48    1.96
  -3 -10   3   31.36    1.61
   6  -3   1    3.58    0.84
  -6  -3  -1    1.34    0.59
  -6   3  -1    1.37    0.56
  -6   3  -1    1.80    0.75
   6   3   1    1.50    0.58
  -3   9  -4    7.23    0.82
  -3   9  -4    6.60    0.72
  -3  -9  -4    6.52    0.62
  -6  -1  -2  111.38    5.03
  -6   1  -2  110.65    5.04
  -6  -1  -2  121.21    5.40
   6  -1   2  114.60    5.21
  -6   1  -2  115.90    5.19
   6   1   2  122.28    5.55
  -4   1  -6    9.96    0.79
  -4  -1  -6   10.23    0.83
   4   1   6    9.87    0.83
  -4  -1  -6   10.03    0.83
   4  -1   6   10.19    0.85
  -4   1  -6   11.00    0.91
  -5   6   3  629.49   25.94
  -5  -6   3  625.56   27.65
   1   8   6   69.55    3.36
  -1   8  -6   70.10    3.19
  -1   8  -6   73.73    3.49
  -3  -1   7  318.99   16.13
  -3   1   7  312.38   13.22
   2 -11  -3   57.77    2.90
  -2  11   3   55.80    2.63
  -2 -11   3   58.45    2.72
  -2  11   3   57.52    2.88
   2  11  -3   56.24    2.84
  -2 -11   3   56.61    2.60
   2  -9  -5  360.45   15.78
  -2   9   5  362.47   15.44
   0   6   7  128.60    5.54
   0   6   7  134.81    6.22
   0   6  -7  132.46    5.72
   0   6  -7  137.19    6.20
  -3  11   1  837.23   34.19
  -3  11   1  843.79   35.57
  -3 -11   1  863.13   35.80
  -3 -11   1  808.44   33.59
  -6   2   2  598.27   25.04
  -6  -2   2  594.82   27.03
  -3  10  -3  106.55    4.83
  -3  10  -3  102.90    4.54
  -5  -7   2  117.67    6.08
  -5  -7   2  110.28    4.92
  -5   7   2  116.72    5.21
  -5  -4  -4   24.55    1.46
   5   4   4   26.68    1.58
  -5   4  -4   26.10    1.51
  -5   4  -4   25.44    1.49
  -5  -4  -4   22.48    1.30
  -2  12   0   15.38    1.15
  -2 -12   0   15.60    1.10
  -2  12   0   14.73    0.93
   2 -12   0   14.46    1.14
   2  12   0   14.94    1.05
  -2 -12   0   14.34    0.90
  -3 -11  -1    9.67    0.70
  -3  11  -1   10.02    0.80
   3 -11   1    9.53    0.93
   2 -11   3   32.15    1.72
   2  11   3   30.57    1.62
  -2  11  -3   31.18    1.63
  -2   9  -5   18.84    1.18
   2   9   5   18.91    1.21
   0 -11  -4  253.99   10.85
   0  11   4  244.68   10.63
   0  11  -4  241.32   10.40
   0  11  -4  251.71   10.86
   0   0  -8   30.34    1.73
   0   0   8   47.14    2.36
  -3   6   6  380.88   17.05
  -5   7  -2   63.90    3.44
  -5   6  -3    6.16    0.79
  -5   6  -3    5.97    0.72
  -5  -6  -3    6.47    0.78
   6   2   2   46.05    2.40
   6  -2   2   45.95    2.40
  -6   2  -2   46.91    2.43
  -6   2  -2   46.32    2.37
  -6  -2  -2   47.87    2.49
  -3   0  -7   -0.09    0.47
  -3   0  -7   -0.04    0.41
   3   0   7    0.08    0.44
   4  -2   6  117.82    5.23
  -4  -2  -6  127.34    5.48
  -4   2  -6  125.96    5.44
  -4   2  -6  121.79    5.41
   4   2   6  129.93    5.68
  -4  -2  -6  118.89    5.63
  -3   8   5    2.93    0.77
  -3  -2   7  104.46    5.23
  -3   2   7   86.82    4.71
   0  -1  -8    9.69    0.81
   0   1  -8    9.19    0.79
   0   1   8   11.91    0.81
   0  -1   8   11.04    0.78
   0  -1   8   11.24    0.85
  -4  -6   5  168.97    8.45
  -2  12   1   31.98    1.81
  -2  12   1   30.93    1.59
  -2 -12   1   31.24    1.67
   2  12  -1   30.80    1.69
  -2 -12   1   31.80    1.59
  -5   0   5    1.04    0.84
  -4  -3   6   20.25    1.62
  -2  12  -1    9.08    0.84
   2  12   1    9.08    0.77
  -2 -12  -1   10.36    0.94
   2 -12   1   10.03    0.89
  -2  12  -1    9.09    0.75
  -6  -4   0  759.03   32.61
  -6   4   0  741.04   31.00
   1   6  -7  177.43    7.96
  -1   6   7  190.31    8.68
  -1   6   7  180.55    7.67
   0  10   5  277.94   11.67
   0  10  -5  296.90   12.59
   0 -10  -5  289.44   12.77
   3   1   7   48.04    2.34
  -3   1  -7   47.69    2.42
  -3  -1  -7   48.43    2.28
   3  -1   7   48.34    2.38
   3   1   7   49.49    2.47
   3  -1   7   47.86    2.37
  -3   1  -7   44.50    2.16
  -2   5   7  343.54   14.43
  -2   5   7  347.41   15.26
  -5  -1   5   20.06    1.48
  -5   1   5   22.32    1.65
  -1   6  -7   10.33    0.79
   1   6   7    9.39    0.77
   1   6   7    9.84    0.98
  -1   6  -7    9.54    0.84
   1   6   7    9.32    0.74
  -1   0   8   11.31    0.85
  -6  -4   1 1175.94   50.06
  -6   4   1 1193.21   49.47
  -6   3   2   -0.27    0.70
  -6  -3   2    0.23    0.64
   1 -11  -4   15.60    1.22
   1  11  -4   15.41    1.11
  -1  11   4   14.62    0.94
  -1  11   4   15.26    1.13
   1  11  -4   14.97    1.08
  -3  -8  -5  152.60    6.45
  -3   8  -5  166.06    7.35
   3   6   6   60.81    2.92
  -3   6  -6   62.11    3.03
  -3  -6  -6   58.77    2.75
  -3   6  -6   63.97    2.94
   3   6   6   62.04    3.05
  -4  10   0  483.16   19.87
  -4  10   0  511.77   21.13
   0   2  -8    0.35    0.50
   0   2   8    0.11    0.36
   0  -2  -8    0.20    0.41
   0   2   8    0.49    0.33
   0   2   8    0.33    0.66
  -5  -5   4  207.41    9.40
  -5   5   4  214.62    9.20
  -1  11  -4    2.33    0.53
   1  11   4    2.40    0.53
  -1   1   8  128.05    5.55
  -1   1   8  137.50    6.45
  -5  -8   0   34.99    2.04
  -5   8   0   35.58    1.93
  -5   8   0   37.83    2.05
   6   4   1  135.99    6.49
  -6   4  -1  148.99    6.56
  -6  -4  -1  153.01    6.92
  -6   4  -1  131.37    5.85
   2   5   7    5.47    0.78
   2   5   7    4.90    0.56
  -2   5  -7    4.76    0.67
  -2  -5  -7    5.33    0.57
  -2   5  -7    6.14    0.66
   2   5   7    5.47    0.66
  -4   6  -5   98.19    4.33
  -4   6  -5  107.67    4.96
  -4  -6  -5   90.91    4.04
   1   0   8  120.10    5.27
  -1   0  -8  131.44    5.77
  -3   2  -7  365.51   16.26
   3   2   7  364.82   15.28
   3   2   7  338.78   14.23
  -3  -2  -7  358.70   14.96
   3  -2   7  343.74   14.41
  -3   2  -7  366.27   15.20
   1  10  -5   18.46    1.23
  -1  10   5   17.49    1.21
   1  10  -5   17.13    1.18
  -1  10   5   18.31    1.09
  -1  10   5   18.73    1.24
   1 -10  -5   17.97    1.27
   0  12  -3   78.54    3.55
   0  12   3   85.77    4.01
   0 -12  -3   85.20    3.96
   0  12  -3   81.14    3.69
   0 -12   3   83.09    3.70
  -5  -2   5  125.96    6.21
  -5   2   5  133.86    6.51
  -6   3  -2   29.22    1.65
  -6  -3  -2   31.95    1.78
   6   3   2   28.30    1.71
  -6   3  -2   30.41    1.74
  -1   1  -8   87.06    3.94
   1   1   8   87.73    3.95
   1  -1   8   85.03    3.79
   1   1   8   84.84    3.89
  -1  -1  -8   87.67    4.09
  -3  11   2   57.19    2.71
  -3 -11   2   55.11    2.55
  -3  11   2   58.20    2.83
  -3 -11   2   65.37    3.04
  -4  -3  -6  187.65    7.90
   4   3   6  189.13    8.08
  -4   3  -6  184.59    8.14
   4  -3   6  175.54    7.59
  -4   3  -6  185.75    7.92
  -3   3   7    8.38    1.00
  -3  -3   7    9.10    1.18
  -3   3   7    8.73    0.71
  -5   0  -5    0.32    0.53
  -5   0  -5    0.14    0.51
   5   0   5    0.13    0.46
  -4 -10   1    2.82    0.47
  -4  10   1    3.38    0.62
  -4 -10   1    3.60    0.56
  -1  10  -5  207.89    8.88
  -1  10  -5  195.13    8.40
   1  10   5  199.73    8.62
  -4  -9   3  517.72   21.42
  -4   9   3  517.98   21.43
  -6   0   3    0.13    0.67
  -5  -8   1   46.99    2.32
  -5  -8   1   40.91    2.38
  -5   8   1   47.26    2.46
  -5   8   1   50.13    2.59
  -4 -10  -1    2.16    0.61
  -4  10  -1    2.92    0.62
  -4  10  -1    2.82    0.73
  -4  -8   4 1819.44  109.12
  -4   8   4 1667.43   67.80
  -3  11  -2   37.63    1.94
   3 -11   2   41.52    2.18
  -3  11  -2   39.68    1.99
  -5   1  -5  241.95   13.83
   5  -1   5  216.25    9.21
   5   1   5  227.41    9.64
  -5   1  -5  219.12    9.28
  -5  -1  -5  227.84    9.77
  -5  -1  -5  223.29    9.37
  -1   2   8  258.56    8.72
  -1   2   8  254.84    9.27
   0  13   0   -0.04    0.58
   0 -13   0    0.02    0.65
   0  13   0    0.25    0.40
   0 -13   0    0.16    0.42
  -5   8  -1    0.51    0.69
  -5   8  -1    1.17    0.61
  -5  -8  -1    0.82    0.57
  -6   1   3  502.24   18.17
  -6  -1   3  482.46   17.99
  -5   5  -4   26.58    1.92
  -5  -5  -4   27.12    1.94
  -5   5  -4   29.61    2.06
  -4  -4   6   74.18    5.13
   2  12  -2  359.67   12.81
  -2 -12   2  373.13   12.40
  -2  12   2  354.26   11.59
  -2  12   2  375.85   12.41
  -2 -12   2  348.56   11.71
  -2   8   6   48.03    3.11
   2  -8  -6   43.98    3.06
  -2   8   6   45.93    3.14
  -4   9  -3    4.24    0.64
  -4   9  -3    4.12    0.78
  -1   2  -8   39.23    2.56
   1   2   8   37.51    2.50
   1   2   8   36.02    2.38
  -1  -2  -8   36.49    2.44
   0   3   8  153.13    5.48
   0   3   8  161.31    6.72
   0   3  -8  152.48    6.59
   0   3   8  158.97    5.50
  -1 -12   3   31.69    2.09
  -1  12   3   21.91    1.66
   1 -12  -3   22.53    1.78
   1  12  -3   21.64    1.62
  -1  12   3   21.16    1.48
   1  12  -3   22.62    1.69
  -2  12  -2    7.45    0.85
   2 -12   2    8.37    0.92
   2  12   2    7.92    0.80
  -2  12  -2    8.16    0.79
   1 -12   3   10.42    0.96
   1  12   3   10.42    0.97
  -1  12  -3   14.33    1.12
  -1  12  -3    9.58    0.98
  -4  -8  -4  550.85   17.95
  -4   8  -4  534.76   18.31
  -6   0  -3   -0.14    0.60
   6   0   3   -0.09    0.56
  -6   0  -3    0.22    0.58
   5   2   5   80.56    5.14
  -5  -2  -5   92.94    3.83
   5  -2   5   84.56    5.33
  -5   2  -5  105.32    4.43
  -5  -2  -5   87.44    5.62
  -5   2  -5   91.90    3.82
   0  13  -1  161.10    5.68
   0 -13  -1  165.06    5.90
   0  13   1  155.07    5.63
   0 -13   1  156.21    5.35
   0 -13   1  160.19    5.62
   0  13  -1  159.16    5.72
   0  13   1  154.35    5.47
   0   9  -6  111.08    4.44
   0  -9  -6  106.43    4.52
   0   9   6  106.90    4.01
  -5  -3   5  392.03   13.71
  -5   3   5  406.14   15.06
  -6   4   2  153.91    5.75
  -6  -4   2  159.78    6.20
  -6   5   0   76.83    4.88
  -6  -5   0   79.38    5.14
  -6   2   3  157.63    5.94
  -6  -2   3  161.17    6.31
   2   8   6    0.87    0.37
   2   8   6    0.66    0.51
  -2   8  -6    0.68    0.56
  -2   8  -6    0.73    0.50
  -6   1  -3  365.22   17.10
  -6   1  -3  384.93   12.85
  -6  -1  -3  381.76   12.60
   6   1   3  407.55   13.54
  -6  -1  -3  338.54   12.95
   6  -1   3  388.60   13.06
  -5  -7   3    9.38    0.88
  -5  -7   3   10.61    1.27
  -5   7   3    9.99    1.11
   0   7   7    9.53    0.83
   0   7  -7    9.97    0.94
   0   7   7    9.73    1.02
   0   7  -7    9.30    0.94
  -1  13   0  471.47   15.58
  -1  13   0  462.21   15.07
  -1 -13   0  512.83   16.95
   1 -13   0  477.86   15.62
   1  13   0  468.54   15.62
  -1   3   8  116.23    5.16
  -1   3   8  121.53    4.29
  -6  -5   1 1175.66   46.10
  -6   5   1 1131.99   38.51
  -6  -4  -2  138.89    5.01
   6   4   2  123.95    4.75
  -6   4  -2  120.06    4.52
  -6   4  -2  125.89    4.58
   4   4   6  286.78   10.64
  -4  -4  -6  301.10    9.89
  -4   4  -6  301.55   10.13
  -4   4  -6  292.02   10.88
  -3   4   7    3.03    0.54
  -3   4   7    2.38    0.75
  -2   6   7   55.93    3.76
  -2   6   7   52.59    3.36
  -4  10   2  121.68    4.42
  -4 -10   2  114.09    4.17
  -4 -10   2  122.65    4.46
  -3   7   6  234.80    8.70
  -6   5  -1  100.95    3.81
  -6  -5  -1  108.11    4.15
  -5   7  -3  289.75   10.20
   1   3   8  373.98   12.31
  -1   3  -8  386.16   12.94
  -1  -3  -8  326.94   13.94
   1   3   8  347.46   13.80
   1   3   8  377.44   12.89
  -5   8   2   22.66    1.81
  -5   8   2   22.46    1.84
  -5  -8   2   22.36    1.82
  -5  -8   2   22.20    1.62
  -1   9   6  162.86    5.54
  -1   9   6  160.77    5.82
   1  -9  -6  162.50    6.75
  -6   2  -3  199.36    6.90
   6   2   3  206.74    7.26
  -6  -2  -3  163.03   10.28
   6  -2   3  191.64    6.88
  -6   2  -3  188.40    6.96
  -6  -2  -3  190.45    6.60
   1 -13  -1    0.17    0.59
  -1  13   1    0.74    0.37
   1  13  -1    0.43    0.52
  -1  13   1   -0.43    0.57
  -1 -13   1   -0.03    0.39
  -1 -13   1    0.11    0.54
  -4   7   5  190.67    7.14
  -1 -13  -1   -0.15    0.60
   1 -13   1    0.15    0.54
   1  13   1    0.38    0.42
  -1  13  -1    0.12    0.55
  -1  13  -1    0.90    0.39
  -3  10   4  264.34    8.94
  -3  10   4  274.61    9.65
  -1   7   7  185.80    6.55
  -1   7   7  185.07    6.30
   1   7  -7  187.26    6.49
  -4  10  -2  392.86   12.90
  -4  10  -2  412.16   13.96
  -2   0   8  907.61   35.57
  -1   9  -6  329.17   11.03
   1   9   6  313.23   10.51
  -5   3  -5   48.89    3.17
   5   3   5   51.58    3.40
  -5   3  -5   40.24    2.83
   5  -3   5   46.48    3.07
  -5  -3  -5   49.44    3.19
  -5   6   4  442.90   14.63
  -5  -6   4  437.86   15.25
  -2  11   4  522.58   17.21
   2  11  -4  552.35   19.97
  -2  11   4  567.74   18.46
   2 -11  -4  584.50   19.26
  -6  -3   3   40.19    2.86
  -6   3   3   40.79    2.83
  -5   8  -2  114.66    4.16
  -5   8  -2  116.86    4.34
   2   6   7  874.38   31.14
  -2  -6  -7  898.98   29.74
  -2   6  -7  931.23   30.37
   2   6   7  908.98   29.35
  -2   6  -7  922.22   30.73
   2   6   7  880.85   29.78
  -2   1   8   97.87    3.84
  -2  -1   8   97.32    4.24
  -1   7  -7   86.28    5.35
   1   7   7   83.00    5.19
  -1   7  -7   84.65    5.31
   1   7   7   84.70    5.45
   0   4   8   50.43    3.32
   0   4  -8   56.76    3.62
   0   4   8   50.78    3.40
   0   4   8   51.64    3.27
  -3  10  -4  347.29   11.83
  -3  10  -4  288.65    9.64
  -3   7  -6    7.25    0.79
  -3  -7  -6    7.83    0.71
  -3   7  -6    8.61    0.88
  -3   4  -7   36.04    2.45
  -3  -4  -7   32.84    2.16
   3   4   7   31.96    2.22
  -3   4  -7   35.21    2.33
   3   4   7   35.68    2.48
  -2  11  -4  153.58    5.41
  -2  11  -4  149.72    5.23
   2  11   4  169.58    6.01
  -2  10   5   10.94    1.10
  -2  10   5   10.23    1.01
   2 -10  -5   10.28    1.14
  -5  -4   5  127.30    4.91
  -5   4   5  127.27    5.11
  -4  -5   6    0.79    0.85
   0 -13   2   82.99    5.12
   0  13  -2   82.29    5.17
   0 -13  -2   86.17    5.44
   0  13   2   80.28    5.03
   0  13  -2   77.28    4.88
  -4   7  -5    4.40    0.80
  -4   7  -5    3.78    0.67
  -4  -7  -5    3.56    0.58
  -2   0  -8   92.16    3.77
   2   0   8   93.35    3.91
  -3   9   5   17.11    1.47
  -3  11   3    3.27    0.73
  -3 -11   3    2.44    0.57
  -3  11   3    2.62    0.57
   2   1   8    0.66    0.41
  -2  -1  -8    0.90    0.42
   2  -1   8    0.81    0.44
   2   1   8    0.62    0.50
  -2   1  -8    0.26    0.43
  -5   6  -4  369.31   12.18
  -5  -6  -4  388.90   12.80
  -5   6  -4  366.13   12.69
  -2  10  -5   86.06    5.36
  -2  10  -5   85.59    5.31
   2  10   5   85.72    5.36
  -2   2   8   18.19    1.31
  -2   2   8   18.56    1.64
  -6  -3  -3   93.99    7.08
   6   3   3  127.35    4.69
  -6  -3  -3  123.18    4.52
   6  -3   3  116.13    4.41
  -6   3  -3  123.15    4.46
  -6   3  -3  119.46    4.49
  -3  12   0   60.71    3.90
  -3  12   0   57.19    3.64
  -1   4   8   99.63    3.60
  -1   4   8   97.92    4.34
  -6   5   2   24.23    1.86
  -6  -5   2   23.34    1.91
  -3  11  -3   68.39    4.31
  -3  11  -3   71.77    4.52
  -3   9  -5   61.50    3.96
   1   4   8   16.85    1.29
  -1  -4  -8    8.26    0.96
   1   4   8   17.90    1.37
  -1   4  -8   17.26    1.31
   1   4   8   15.77    1.41
  -2  12   3  141.17    5.10
   2  12  -3  138.09    5.18
  -2 -12   3  138.48    4.83
  -2  12   3  136.66    4.74
  -1 -13   2    8.96    0.80
  -1  13   2    9.93    1.03
   1  13  -2    9.60    0.93
  -1  13   2    9.29    0.80
   1 -13  -2   10.95    1.12
  -1 -13   2    8.49    0.84
  -3  12   1  356.87   11.74
  -3  12   1  367.79   12.17
  -3 -12   1  355.79   11.86
  -3 -12   1  373.49   12.39
  -6   6   0   -0.14    0.76
  -6   6   0    0.73    0.62
  -6  -6   0    0.80    0.59
  -5   9   0  137.51    5.08
  -5  -9   0  133.95    5.34
  -5   9   0  130.98    4.71
  -6   5  -2  112.75    4.24
  -6   5  -2  120.59    4.38
   1  13   2   95.60    4.04
  -1  13  -2   87.84    5.44
   1 -13   2   87.86    5.44
  -1  13  -2   91.55    3.87
   4   5   6  129.98    4.74
  -4   5  -6  132.62    4.66
  -4   5  -6  129.75    4.82
   4   5   6  128.42    4.83
  -4  -5  -6  135.79    4.70
  -3   5   7   87.87    5.70
  -3   5   7   87.11    5.44
   5   4   5   24.17    1.80
  -5   4  -5   24.61    1.81
   5  -4   5   11.83    1.07
  -5  -4  -5   21.76    1.62
  -5   4  -5   22.24    1.61
  -3  12  -1    0.61    0.45
   3 -12   1    0.42    0.59
  -2  12  -3   34.15    2.28
   2  12   3   32.72    2.21
   0  11  -5  130.89    4.70
   0  11   5  127.62    4.69
  -6  -4   3  355.53   12.72
  -6   4   3  362.72   12.80
   0  12   4  262.09    8.86
   0  12  -4  261.23    9.34
   0  12  -4  263.67    9.03
  -6   6   1  108.35    4.15
  -6   6   1  104.33    4.02
  -6  -6   1  108.93    4.41
  -5  -9   1   61.31    4.19
  -5   9   1   63.59    4.11
  -5   9   1   64.80    4.19
  -6   0   4  477.29   16.66
  -4   9   4  503.43   16.91
   2  13   0    2.78    0.61
  -2  13   0    2.65    0.64
  -2  13   0    2.97    0.51
  -2 -13   0    2.62    0.57
   2 -13   0    3.09    0.68
  -2   3   8  829.68   27.55
  -2   3   8  820.40   30.19
  -5   9  -1  275.77    9.80
  -5   9  -1  259.22    8.79
  -6  -6  -1    9.33    1.02
  -6   6  -1    9.86    1.06
  -6   1   4   24.53    1.91
  -6  -1   4   24.34    1.96
  -4 -11   0  237.06    8.11
  -4  11   0  236.59    7.95
  -4   0   7    0.01    0.92
   0   5   8  183.22    6.23
   0   5  -8  158.61    5.83
   0   5   8  181.43    6.47
  -4  10   3    7.22    0.91
  -4  10   3    6.73    0.91
  -4 -10   3    6.34    0.76
  -2   9   6  467.63   15.71
  -2   9   6  441.23   14.56
   2  -9  -6  439.56   16.70
  -3  -5  -7   66.31    4.12
   3   5   7   65.48    4.31
  -3   5  -7   68.49    4.39
  -3   5  -7   67.80    4.24
   3   5   7   63.57    4.15
  -6  -4  -3    2.99    0.77
  -6   4  -3    2.10    0.60
  -6   4  -3    2.89    0.77
   6   4   3    2.44    0.62
  -4  -1   7  117.93    4.61
  -4   1   7  111.50    4.26
  -5  -8   3  220.11    7.81
  -5   8   3  226.77    8.14
  -5  -8   3  217.26    8.71
   0   8  -7   56.88    3.61
   0   8   7   56.05    3.56
   0   8   7   56.21    3.70
   0   8  -7   57.71    3.70
   2  13  -1  262.24   11.12
  -2  13   1  245.90    9.97
  -2 -13   1  242.84    9.86
  -2 -13   1  248.53   10.43
  -2  13   1  253.30   10.37
  -2   7   7   31.13    2.09
  -2   7   7   30.94    2.29
   1  11  -5  367.28   15.35
   1  11  -5  360.79   15.51
  -1  11   5  347.16   14.11
   1 -11  -5  345.06   14.79
  -5  -5   5  369.18   16.91
  -5   5   5  384.54   16.39
  -2  13  -1  133.00    5.59
   2 -13   1  135.93    5.78
  -2  13  -1  126.17    5.38
   2  13   1  134.55    5.87
   1  12  -4  250.66   10.27
   1 -12  -4  258.96   11.03
   1  12  -4  250.64   10.57
  -1  12   4  247.27   10.37
  -4   9  -4  253.12   10.60
  -4  -9  -4  270.68   11.74
  -4   9  -4  225.85    9.28
  -2   3  -8    1.03    0.52
   2   3   8    0.82    0.50
   2   3   8    0.48    0.39
  -2  -3  -8    0.92    0.45
  -2   3  -8    0.71    0.48
  -4 -11   1  928.37   37.58
  -4  11   1  932.54   36.94
   1  11   5  110.84    4.63
  -1  11  -5   98.69    4.40
  -1  11  -5  105.34    4.34
   1  12   4 2327.92   70.30
  -1  12  -4 2215.40   89.03
  -4  10  -3 1097.63   43.45
  -4  10  -3 1184.15   46.96
  -6   2   4   39.56    2.16
  -6  -2   4   41.96    2.26
  -4  11  -1  175.55    7.64
  -4  11  -1  171.06    7.10
   2   9   6  132.47    5.72
   2   9   6  128.04    5.49
  -2   9  -6  130.22    5.52
  -6   0  -4    0.55    0.59
  -6   0  -4    1.19    0.60
   6   0   4    0.47    0.56
  -5   7   4 1107.19   43.98
  -5  -7   4 1100.85   49.52
  -1   5   8  619.06   24.82
   1   5  -8  585.35   23.50
  -1   5   8  614.51   24.80
  -3   8   6    3.06    0.79
  -4   6   6  124.85    5.48
  -4  -6   6  126.65    5.95
  -5   0   6  404.70   16.45
  -5   8  -3  185.95    7.83
   2   7   7  260.83   10.81
  -2   7  -7  258.19   10.70
  -2   7  -7  273.04   11.13
   2   7   7  269.86   11.26
  -3 -12   2    2.91    0.44
  -3 -12   2    2.58    0.58
  -3  12   2    2.71    0.73
  -3  12   2    2.78    0.53
  -4  -2   7  361.33   15.94
  -4   8   5   11.01    1.06
  -6   1  -4    2.13    0.62
  -6   1  -4    4.55    0.76
   6   1   4    4.76    0.72
  -6  -1  -4    2.82    0.62
   6  -1   4    2.78    0.62
  -6  -1  -4    4.31    0.71
   0  10  -6    0.57    0.56
   0  10  -6    0.42    0.52
   0  10   6    0.51    0.59
  -1   8   7  522.35   21.06
   1   8  -7  556.54   22.46
  -1   8   7  503.96   20.23
  -5   1   6   26.33    1.67
  -5  -1   6   25.52    1.64
   1   5   8   17.42    1.07
   1   5   8   17.58    1.07
  -1   5  -8   18.01    1.07
  -1   5  -8   16.85    1.08
  -1  -5  -8   11.08    0.84
   1   5   8   16.29    1.19
  -3  12  -2   39.22    1.86
   4   0   7   -0.14    0.44
  -4   0  -7   -0.11    0.47
  -4   0  -7   -0.41    0.53
   0  13   3    0.20    0.50
   0  13  -3    0.05    0.51
   0 -13  -3    0.40    0.62
   0  13  -3    0.49    0.48
   0 -13   3    0.01    0.44
  -6  -6   2  133.78    6.12
  -6   6   2  127.36    5.56
  -5   9   2   46.25    2.26
  -5  -9   2   49.54    2.69
  -5  -9   2   43.23    2.09
  -5   9   2   51.25    2.57
  -2   4   8    4.25    0.88
  -2   4   8    3.34    0.46
   1   8   7   61.75    2.79
   1   8   7   58.46    2.70
  -1   8  -7   65.41    2.79
  -1   8  -7   61.33    2.82
  -5   5  -5  219.10   10.52
  -5   5  -5  228.78    9.45
  -5  -5  -5  232.97    9.54
   4   1   7  125.26    5.41
  -4  -1  -7  131.08    5.49
  -4   1  -7  130.75    5.52
  -4   1  -7  130.07    6.10
   4  -1   7  122.97    5.30
  -4  -1  -7  131.10    5.98
  -6  -5   3  645.08   27.72
  -6   5   3  652.80   27.41
  -3   8  -6   11.08    0.85
  -3   8  -6   10.92    0.91
  -5  -7  -4    4.48    0.72
  -5   7  -4    3.30    0.75
  -5   7  -4    3.72    0.65
  -6   2  -4  458.56   18.42
   6   2   4  488.65   19.70
   6  -2   4  455.00   18.44
  -6  -2  -4  455.79   18.31
  -6  -2  -4  355.68   27.86
  -6   2  -4  492.51   20.53
  -5   9  -2  150.35    6.35
  -5   9  -2  156.70    6.78
  -5   2   6  399.70   17.32
  -5  -2   6  379.83   15.96
  -6   3   4   15.61    1.33
  -6  -3   4   16.73    1.30
  -6   6  -2  739.56   30.15
  -4   8  -5    2.85    0.56
  -4   8  -5    2.23    0.65
  -4  -8  -5    2.38    0.49
   1  10  -6  299.05   12.71
  -1  10   6  299.12   12.17
  -1  10   6  302.24   12.13
  -1  10   6  298.39   12.23
   1 -10  -6  320.43   14.44
  -4   6  -6   54.50    2.40
  -4  -6  -6   54.54    2.39
  -4   6  -6   51.09    2.39
  -3   6   7    3.45    0.86
  -3   6   7    3.37    0.52
  -2 -13   2  168.75    7.05
  -2  13   2  165.07    6.81
  -2  13   2  173.86    7.45
  -2 -13   2  171.91    7.09
   2  13  -2  167.80    7.16
  -2   4  -8  337.22   13.76
   2   4   8  320.44   14.55
   2   4   8  348.71   14.21
   2   4   8  337.86   13.89
  -2   4  -8  353.78   14.48
  -2  -4  -8  342.71   13.97
  -4  -3   7  293.72   12.74
   1  10   6   95.19    4.05
  -1  10  -6  104.07    4.50
   1 -13  -3  115.33    4.11
  -1  13   3  116.31    4.13
   1  13  -3  116.55    4.02
  -1  13   3  109.16    4.38
  -1 -13   3  110.13    4.40
   1  13  -3  114.13    3.93
  -4   2  -7  107.44    4.62
  -4   2  -7  104.84    4.24
   4   2   7  108.46    4.48
   4   2   7  109.47    4.59
   4  -2   7  101.20    4.21
  -4  -2  -7  106.92    4.32
   5   0   6 1019.21   42.21
  -5   0  -6  998.24   40.39
  -5   0  -6 1073.99   42.56
  -4 -11   2    4.67    0.57
  -4  11   2    4.52    0.68
  -4  11   2    4.76    0.87
  -4 -11   2    4.90    0.57
  -2  13  -2  555.93   22.23
   2  13   2  555.56   22.75
   2 -13   2  580.01   23.14
  -2  13  -2  559.47   22.41
   0  14   0  629.42   25.11
   0  14   0  588.46   23.96
   0 -14   0  587.63   23.67
  -6  -7   0  675.84   28.33
  -6   7   0  697.84   28.85
  -6   7   0  675.94   27.08
  -1  13  -3    2.00    0.59
   1  13   3    1.44    0.50
  -1  13  -3    1.67    0.49
  -6  -5  -3   32.95    1.78
  -6   5  -3   33.08    1.72
  -6   5  -3   27.48    1.52
   5  -1   6    5.06    0.68
   5   1   6    5.64    0.68
  -5   1  -6    5.30    0.66
  -5  -1  -6    5.19    0.67
  -5  -1  -6    5.41    0.65
  -5   1  -6    5.36    0.65
  -3  11   4   35.31    1.80
  -3  11   4   36.99    1.96
  -3   1   8   26.14    1.76
  -4  11  -2  132.76    5.58
  -4  11  -2  139.26    5.92
   0   6   8  381.38   15.34
   0   6  -8  385.61   16.33
   0   6   8  357.92   15.06
  -6   7   1  323.97   13.35
  -6   7   1  337.60   13.88
  -6  -7   1  333.43   14.73
   3   6   7   68.69    3.14
  -3   6  -7   70.63    2.98
  -3   6  -7   67.92    2.96
   3   6   7   67.64    3.00
  -3  -6  -7   67.89    2.84
  -3  10   5   21.73    1.45
   0 -14  -1  511.54   20.52
   0  14  -1  483.90   19.83
   0  14  -1  476.05   19.10
   0  14   1  486.07   19.48
   0  14   1  460.62   18.99
  -6  -3  -4    4.63    0.74
   6   3   4    6.10    0.77
  -6   3  -4    4.43    0.71
   6  -3   4    5.09    0.71
  -5   6   5   37.32    2.12
  -5  -6   5   41.11    2.27
  -6   7  -1  496.77   20.31
  -6   7  -1  484.99   19.96
  -5   3   6  116.50    4.27
  -5  -3   6  110.32    4.74
  -3  11  -4    0.04    0.50
  -3  11  -4    0.60    0.68
  -2  11   5    1.84    0.72
  -2  11   5    1.34    0.48
  -5  -2  -6  674.53   26.75
  -5   2  -6  654.67   26.27
   5   2   6  629.49   27.38
   5  -2   6  640.62   25.73
  -5   2  -6  660.78   27.62
   2  12  -4    5.20    0.69
  -2  12   4    4.93    0.56
  -2  12   4    5.58    0.79
  -3  -2   8   69.35    3.36
  -3   2   8   72.98    3.32
  -1  14   0  205.83    8.48
   1  14   0  206.97    8.59
  -1  14   0  201.34    8.34
  -1 -14   0  223.50    9.26
  -7   0   0  130.31    5.76
   7   0   0  129.21    5.84
  -3   0  -8 1345.28   54.19
   3   0   8 1271.79   51.11
   4  -3   7  407.09   16.55
   4   3   7  423.91   17.22
  -4   3  -7  436.71   17.97
  -4  -3  -7  415.81   16.72
  -4   3  -7  420.96   16.99
   1   6  -8   81.80    3.56
  -1   6   8   87.64    3.97
  -1   6   8   91.24    3.71
  -7   1   0   12.31    1.01
  -7  -1   0   13.23    1.08
   7   1   0   13.31    1.10
  -3  10  -5  124.97    5.34
  -3  10  -5  125.44    5.39
  -6   4   4   20.37    1.40
  -6  -4   4   19.92    1.45
   2  11   5   97.11    4.03
  -2  11  -5   98.06    4.02
  -2  11  -5   98.43    4.05
  -2   5   8    6.81    0.61
  -2   5   8    6.29    0.90
  -3   1  -8  771.89   30.97
  -3  -1  -8  762.40   30.53
   3  -1   8  710.05   28.61
  -3   1  -8  728.06   30.51
   3   1   8  726.61   29.35
   2  12   4  525.72   21.27
  -2  12  -4  486.76   19.75
  -7   0   1    0.27    0.65
  -5  10   0  327.79   13.29
  -5  10   0  342.67   13.98
   1   6   8  216.53    9.16
   1   6   8  209.63    9.24
   1   6   8  216.24    8.89
  -1   6  -8  224.62    9.27
  -1   6  -8  214.30    9.40
  -4   4   7    4.48    0.91
  -4  -4   7    5.78    1.09
  -1 -14   1    0.80    0.53
  -1  14   1    0.53    0.56
  -1  14   1    0.03    0.35
   1  14  -1    0.53    0.58
  -3  12   3  281.51   11.42
  -3  12   3  294.59   12.06
  -2   8   7    0.92    0.40
  -2   8   7    1.51    0.75
   1  14   1  628.50   25.38
  -1  14  -1  726.13   28.94
  -1  14  -1  623.07   25.03
  -4   7   6  134.37    5.96
  -7   1   1  513.49   21.40
  -7  -1   1  514.31   21.59
   7   0   1    0.02    0.58
  -7   0  -1   -0.02    0.71
  -5   6  -5  989.63   39.25
  -5  -6  -5  925.27   36.66
  -5   6  -5  986.66   43.95
  -6  -6   3  117.57    4.80
  -6   6   3  127.76    5.76
   7   2   0    1.60    0.62
  -7   2   0    1.25    0.62
  -7  -2   0    1.32    0.61
  -5  10   1  120.10    4.26
  -5 -10   1  116.73    4.76
  -5  10   1  112.16    4.64
  -4  10   4    2.00    0.67
  -4  10   4    3.02    0.82
   2   5   8    0.04    0.63
  -2  -5  -8    0.42    0.41
   2   5   8    0.47    0.47
  -2   5  -8    0.63    0.52
  -2   5  -8    0.15    0.50
   2   5   8    0.16    0.38
  -3  12  -3   -0.10    0.42
  -3  12  -3    0.63    0.57
   7   1   1  692.29   28.73
  -7  -1  -1  699.74   28.63
  -7   1  -1  681.69   27.96
   7  -1   1  666.06   27.64
   0   0  -9   -0.10    0.49
  -3   2  -8  112.37    4.56
   3   2   8  111.23    4.59
  -3  -2  -8  110.52    4.52
  -3   2  -8  106.36    4.50
   3   2   8  101.26    4.21
   3  -2   8  100.50    4.16
  -5   9   3  194.21    8.18
  -5  -9   3  187.02    8.85
  -5  -9   3  197.36    8.38
   0   9   7   36.77    1.95
   0   9  -7   38.98    1.96
   0   9  -7   32.40    1.60
   0   9   7   37.85    1.83
  -5  -8   4   41.39    2.26
  -5   3  -6  643.08   32.22
  -5   3  -6  700.39   28.00
   5  -3   6  670.22   27.02
  -5  -3  -6  704.27   27.98
   5   3   6  721.04   29.05
  -3  -3   8  767.65   50.49
  -3   3   8  715.93   30.45
  -6  -7   2    8.51    1.03
  -6   7   2   10.53    1.00
  -5  10  -1  254.92   16.85
  -5  10  -1  274.30   18.16
   2   8   7   36.25    1.76
  -2   8  -7   35.21    1.75
   2   8   7   34.95    1.84
  -2   8  -7   34.74    1.69
   0   1   9   68.12    3.28
   0   1  -9   68.37    3.90
   0  -1  -9   76.88    3.22
  -6  -4  -4   54.41    2.21
   6   4   4   51.60    2.23
  -6   4  -4   52.02    2.22
  -6   4  -4   50.87    2.08
  -3  13   0   40.11    1.66
   3  13   0   40.19    1.70
  -3  13   0   43.29    1.87
  -7   2   1   45.81    2.05
   7   2  -1   45.45    2.19
  -7  -2   1   47.19    2.14
  -2  10   6    9.16    0.70
  -2  10   6    9.52    0.96
   0  14   2   19.88    1.10
   0  14  -2   19.14    1.08
   0 -14   2   20.18    1.04
   0  14  -2   21.20    1.11
  -5   4   6    0.06    0.76
  -5  -4   6   -0.18    0.75
  -3   9   6  372.93   24.59
   0  12  -5   31.66    1.49
   0  12   5   32.63    1.60
   0  12  -5   31.16    1.48
  -4  10  -4    3.58    0.68
  -4  10  -4    2.64    0.57
  -5   9  -3   16.60    1.05
  -5   9  -3   18.19    1.14
  -6   7  -2   41.16    1.83
  -7   2  -1  518.64   34.39
  -7  -2  -1  534.55   35.53
   7   2   1  534.58   35.26
  -7   2  -1  492.38   32.53
  -6   0   5    0.04    0.76
  -4   7  -6   40.20    1.79
  -4   7  -6   39.75    1.65
  -6   6  -3   44.66    1.93
  -6  -6  -3   47.54    2.11
  -6   6  -3   49.12    2.05
  -3   7   7  444.25   29.38
  -3   7   7  428.55   28.24
  -2  13   3  325.20   21.43
   2  13  -3  336.40   22.65
  -2  13   3  320.73   21.11
  -4  -4  -7   89.46    6.03
  -4   4  -7   94.54    6.42
  -4   4  -7   89.40    6.06
   4   4   7   88.92    6.17
  -4   9   5   40.55    2.00
  -1   0   9    0.21    0.84
  -4  11   3    0.27    0.69
  -4 -11   3    1.58    0.50
  -4  11   3    1.63    0.61
  -3  13   1   16.58    1.18
  -3  13   1   15.35    0.89
  -1   9   7   27.40    1.54
   1  -9  -7   26.01    1.64
  -1   9   7   25.55    1.15
   2  10   6   20.22    1.15
  -2  10  -6   20.00    1.18
  -5  -8  -4  274.98   18.27
  -5   8  -4  239.84   15.86
   0   2   9   12.24    1.19
   0   2   9   12.87    0.78
   0   2  -9   13.76    0.93
  -6  -1   5  296.77   19.96
  -6   1   5  286.09   19.59
   3  13   1   18.33    1.07
  -3  13  -1   18.11    0.99
  -3  13  -1   19.72    1.19
   2  13   3   28.74    1.33
  -2  13  -3   27.97    1.47
  -2  13  -3   29.77    1.36
  -1   1   9  994.64   65.11
  -7   0   2 1053.06   69.84
   7   3   0   67.78    3.60
  -7  -3   0   70.62    4.97
  -7   3   0   68.28    3.39
  -1   0  -9    0.03    0.45
   1   9   7    4.11    0.75
  -1   9  -7    3.78    0.61
  -1   9  -7    3.43    0.67
  -4  12   0  156.92   10.46
   0  13   4  691.29   45.30
   0  13  -4  679.49   44.83
   0  13  -4  665.49   43.92
  -3   3  -8    5.41    0.62
   3   3   8    4.80    0.59
  -3  -3  -8    5.45    0.62
  -3   3  -8    5.09    0.69
   3   3   8    5.02    0.67
  -7  -1   2    1.94    0.79
  -7   1   2    1.96    0.81
   1  14  -2    3.48    0.61
  -1  14   2    2.43    0.66
  -1  14   2    2.55    0.43
  -4  11  -3    3.73    0.59
  -4  11  -3    4.05    0.74
  -6  -5   4  894.91   59.94
  -6   5   4  934.64   61.28
  -3   9  -6   31.73    1.47
  -1   1  -9   82.06    5.61
  -1  -1  -9   80.60    5.55
  -1  14  -2    9.00    0.81
   1  14   2   12.20    0.91
   1 -14   2    9.85    0.83
  -1  14  -2   10.08    0.74
   0   7  -8  158.84   10.61
   0   7   8  146.56   10.01
   0   7   8  148.41    9.89
   1  12  -5   97.02    6.65
  -1  12   5   92.34    6.32
   1  12  -5   92.86    6.44
  -7  -3   1  132.91    9.13
  -7   3   1  131.50    8.99
   7   3  -1  124.71    8.68
  -6   8   0   60.94    2.51
  -6   8   0   62.76    2.53
  -4   9  -5   -0.31    0.59
  -5  10   2    9.50    0.94
  -5 -10   2    7.68    0.96
   3   7   7  242.57   16.11
   3   7   7  232.33   15.73
  -3   7  -7  256.19   17.03
  -3   7  -7  262.07   17.31
  -6   2   5  256.62   17.30
  -6  -2   5  264.78   17.65
  -4  -5   7    2.77    1.01
  -4   5   7    2.21    0.87
  -4  12   1  174.95   11.63
  -4  12   1  177.69   11.87
   7   0   2    3.40    0.73
  -7   0  -2    2.78    0.72
  -7   0  -2    2.89    0.73
   1  12   5  126.77    8.53
  -1  12  -5  117.67    7.92
  -1   2   9   93.35    6.77
  -5  -4  -6   17.85    1.01
   5   4   6   17.38    1.10
  -5   4  -6   16.39    1.04
  -5   4  -6   16.64    1.00
   0  11   6   95.30    6.50
   0  11  -6   98.12    6.71
  -5  -7   5  290.65   20.05
  -3   4   8   81.78    5.87
  -3   4   8   83.99    5.72
  -3  -4   8   83.74    6.08
  -4  12  -1  149.00    9.93
  -7   3  -1    3.54    0.74
   7   3   1    4.36    0.79
  -7  -3  -1    4.30    0.73
  -7   3  -1    4.61    0.87
   2  14   0  320.33   21.35
  -2  14   0  324.51   21.49
  -2  14   0  323.77   21.36
  -2   6   8   67.03    3.17
  -2   6   8   70.67    4.98
   7   1   2  277.26   18.45
  -7   1  -2  271.87   18.14
  -7  -1  -2  264.70   18.44
   7  -1   2  279.29   18.62
  -7  -1  -2  268.67   17.88
  -7   1  -2  257.07   17.09
   6   0   5   -0.14    0.47
  -6   0  -5    0.17    0.63
  -6   0  -5    0.03    0.53
  -7   2   2  165.11   11.22
  -7  -2   2  166.93   11.31
  -6   8   1  172.85   11.57
  -6   8   1  175.31   11.72
  -6  -8   1  176.63   12.12
   1  13  -4   19.79    1.14
   1  13  -4   19.64    1.21
   1 -13  -4   20.84    1.33
  -1  13   4   20.11    1.24
  -5  10  -2   19.81    1.14
  -5  10  -2   19.31    1.17
   1   2   9  538.25   35.54
  -1  -2  -9  505.36   36.01
   1   2   9  539.93   35.47
  -1   2  -9  542.63   36.05
   1   2   9  481.56   32.58
   0   3  -9  682.17   45.91
   0   3   9  661.55   43.41
   0   3   9  628.46   43.26
   1  13   4   38.46    1.67
  -1  13  -4   36.11    1.57
  -1  13  -4   35.66    1.62
  -1   7   8  204.33   13.50
  -1   7   8  216.80   14.60
   1   7  -8  219.02   14.59
   6  -1   5   48.03    2.12
   6   1   5   53.56    2.26
  -6   1  -5   50.45    2.06
  -6  -1  -5   49.35    2.02
  -6   1  -5   48.67    2.47
  -6   8  -1   53.80    2.21
  -6   8  -1   54.71    2.27
  -6   5  -4  442.92   29.20
  -6  -5  -4  457.19   30.01
  -6   5  -4  443.01   29.30
   6   5   4  448.52   29.65
  -2  14   1  192.71   12.77
   2  14  -1  201.25   13.50
  -2  14   1  204.59   13.60
   2  14   1   83.24    5.75
  -2  14  -1   79.23    5.44
  -2  14  -1   84.18    5.71
  -5  -5   6   95.47    6.93
  -2   6  -8   80.22    5.65
   2   6   8   81.05    5.57
   2   6   8   80.17    5.48
   2   6   8   76.49    5.41
  -2   6  -8   81.45    5.57
   1   7   8  755.78   49.48
   1   7   8  763.51   50.62
   1   7   8  761.49   50.00
  -1   7  -8  750.09   49.13
  -1   7  -8  786.18   51.70
  -3 -13   2    0.13    0.38
  -3  13   2    0.19    0.44
  -3  13   2    0.25    0.67
  -1  11   6   -0.37    0.65
   1  11  -6    0.62    0.54
   1  11  -6   -0.03    0.50
  -7   2  -2   22.81    1.37
   7   2   2   23.20    1.35
  -7   2  -2   24.54    1.39
  -7  -2  -2   24.53    1.36
  -7   4   0   13.78    1.03
  -7  -4   0   13.59    1.01
  -6   3   5   80.96    5.67
  -6  -3   5   78.62    5.65
  -3  13  -2   56.42    2.15
  -3   4  -8    4.45    0.62
  -3  -4  -8    4.44    0.53
   3   4   8    4.15    0.56
   3   4   8    3.55    0.68
  -3   4  -8    4.41    0.70
   3   4   8    3.37    0.70
   1  11   6   95.73    6.55
  -1  11  -6   98.38    6.68
  -1  11  -6   94.99    6.45
  -5   7  -5  103.15    6.98
  -5   7  -5  107.21    7.46
  -5  -7  -5  110.06    7.45
   4   5   7   19.68    1.13
  -4   5  -7   18.03    1.07
   4   5   7   17.81    1.22
  -4   5  -7   18.68    1.03
  -4  -5  -7   16.89    0.92
  -1   3   9   54.80    2.36
  -1   3   9   57.07    2.11
   6  -2   5 1823.96  119.46
  -6  -2  -5 1907.76  124.31
  -6   2  -5 2114.50   98.94
   6   2   5 2030.79   86.92
  -6   2  -5 1894.02  123.76
  -6   7   3   10.53    1.06
  -6  -7   3    9.10    1.02
  -7   3   2   15.09    1.21
  -7  -3   2   15.52    1.14
  -4   8   6   26.80    1.58
  -7   4   1  214.18   14.44
  -7  -4   1  216.78   14.61
   1   3   9  244.51   16.18
  -1   3  -9  241.70   16.29
  -1  -3  -9  153.23   12.94
   1   3   9  246.51   16.45
   1   3   9  234.56   16.27
   0  14  -3  361.25   23.76
   0  14   3  375.37   24.76
   0  14  -3  382.89   25.49
  -4  12   2    1.55    0.71
  -4  12   2    1.22    0.57
  -2   0   9    0.81    0.81
  -7   4  -1   56.89    2.39
   7   4   1   52.78    2.33
  -7   4  -1   57.06    2.42
  -3  11   5  161.41   10.80
  -3  11   5  168.72   11.32
  -2   9   7  353.42   23.32
  -2   9   7  353.19   23.31
  -3  12   4   17.16    1.02
  -3  12   4   18.35    1.23
  -2   1   9  132.07    8.96
  -2  -1   9  130.19    9.19
  -6   8   2  710.21   46.64
  -6  -8   2  752.79   50.47
  -6   8   2  764.56   50.19
  -4  12  -2  159.08   10.58
  -4  12  -2  158.66   10.71
   0   4   9  197.73   13.53
   0   4   9  200.71   13.29
   0   4  -9  219.55   14.67
  -6   7  -3   27.12    1.39
  -7   3  -2  254.90   17.06
  -7   3  -2  256.44   16.98
   7   3   2  261.10   17.53
  -5   5  -6   73.47    5.16
  -5  -5  -6   67.37    3.30
  -5   5  -6   72.61    4.97
   5   5   6   77.16    5.41
  -7   0   3    0.22    0.77
  -3   5   8  456.19   30.67
  -3   5   8  415.26   27.35
  -6  -6   4  458.80   31.29
  -6   6   4  451.80   29.75
  -5  -9   4   34.38    1.99
   6   3   5  215.54   14.34
  -6   3  -5  191.58   12.74
  -6   3  -5  220.30   14.73
  -6  -3  -5  205.28   13.61
  -7   1   3    1.75    0.77
  -7  -1   3    2.22    0.80
   2  14  -2    4.76    0.69
  -2  14   2    5.04    0.76
  -2  14   2    5.38    0.54
  -3  11  -5  223.90   14.99
  -3  11  -5  206.11   13.77
  -3  12  -4   35.81    1.57
  -3  12  -4   38.79    1.75
   2   9   7   91.83    6.30
  -2   9  -7  102.96    7.09
   2   9   7   96.71    6.61
  -2   9  -7  102.43    6.95
  -6   8  -2   13.16    0.97
  -6   8  -2   14.36    1.02
  -2   0  -9    0.01    0.46
  -4   8  -6  209.44   14.05
  -4   8  -6  221.74   14.68
  -4   6   7  756.74   49.57
  -4  -6   7  755.97   51.28
  -3   8   7  734.37   48.35
  -3   8   7  688.08   45.88
   2  12  -5    1.09    0.63
  -2  12   5    1.24    0.44
  -2  12   5    1.58    0.76
  -1  14   3    0.40    0.59
  -1  14   3    0.32    0.36
   1  14  -3    0.16    0.55
  -5   0   7    0.25    0.92
  -2  14  -2   69.27    4.75
  -2  14  -2   70.57    4.88
   2  14   2   69.57    4.80
  -2  -2   9    1.82    0.85
  -2   2   9    1.50    0.84
   1  14   3  688.91   45.21
  -1  14  -3  633.26   41.69
  -1  14  -3  655.62   43.06
  -5  11   0   65.33    3.29
  -5  11   0   60.35    2.37
  -2   1  -9  118.49    7.95
  -2  -1  -9  122.30    8.22
   2   1   9  113.43    7.68
  -6   4   5   18.98    1.44
  -6  -4   5   16.86    1.34
  -5  10   3  499.18   31.29
  -5 -10   3  470.20   30.22
  -5  -1   7  472.14   30.59
  -5   1   7  488.12   31.73
  -1   4   9    4.18    0.51
  -1   4   9    4.12    0.81
   0  10  -7    0.82    0.66
   0  10   7    1.15    0.67
  -4   0   8  298.04   19.89
  -2  12  -5  364.03   23.20
  -2  12  -5  348.85   21.92
   2  12   5  357.90   22.50
   7   0   3    0.38    0.64
  -7   0  -3   -0.35    0.60
  -7   0  -3   -0.09    0.61
  -4  -1   8  411.78   27.25
  -7  -2   3  350.43   22.70
  -7   2   3  345.52   21.93
  -2  13   4   33.36    1.74
   2  13  -4   32.87    1.88
  -2  13   4   35.37    2.00
  -7   4   2    3.36    0.76
  -7  -4   2    3.23    0.78
   0  15   0    1.07    0.55
   0  15   0    0.45    0.43
  -7  -5   0 1476.89   93.60
  -7   5   0 1410.12   88.88
  -5  11   1   15.62    1.15
  -5  11   1   16.33    1.31
  -4  11   4    0.53    0.68
  -4  11   4    0.73    0.60
   1   4   9   64.77    3.47
   1   4   9   66.64    3.21
  -1  -4  -9   50.16    3.40
  -1   4  -9   52.45    2.66
   1   4   9   68.67    3.33
  -5   9  -4   15.98    1.15
  -2   7   8    0.99    0.33
  -2   7   8    1.46    0.76
   3   5   8  600.40   37.67
  -3   5  -8  607.18   38.66
  -3  -5  -8  542.41   34.27
   3   5   8  577.48   36.92
   3   5   8  601.10   37.63
  -3   5  -8  630.09   39.42
   0   8  -8  182.10   11.75
   0   8   8  192.07   12.14
   0   8   8  190.03   12.23
  -6   6  -4  309.07   19.50
  -6   6  -4  291.36   18.41
  -6  -6  -4  319.60   20.11
   7   1   3   18.40    1.34
   7  -1   3   18.03    1.31
  -7  -1  -3   15.57    1.12
  -7   1  -3   17.77    1.27
  -7  -1  -3   17.35    1.25
  -7   1  -3   16.84    1.21
  -3  10   6   38.06    2.18
  -5  11  -1    2.75    0.72
  -5  11  -1    2.00    0.59
  -5  -6   6  552.85   35.46
  -5  10  -3  113.14    5.19
  -5  10  -3  107.90    5.08
   3   8   7  197.02   12.52
  -3   8  -7  212.42   13.53
  -3   8  -7  200.12   12.72
   3   8   7  223.23   14.12
  -2   2  -9   30.79    1.66
  -2  -2  -9   28.97    1.57
   2   2   9   29.25    1.62
  -2  13  -4  144.18    9.23
   2  13   4  145.44    9.30
  -5  -2   7 2406.78  150.83
  -5   2   7 2550.84  131.22
  -4  10   5  597.73   37.37
  -5  -8   5  261.43   16.75
  -7   5   1  191.27   12.26
  -7  -5   1  201.85   13.16
  -2  11   6    6.37    0.92
  -2  11   6    5.83    0.59
  -2  11   6    5.66    0.69
  -1  10   7   48.44    2.37
  -1  10   7   49.07    2.61
   0  15   1   57.71    2.89
   0  15  -1   52.42    2.63
   0  15  -1   56.32    2.78
   7   4   2  121.34    6.70
  -7   4  -2  120.54    5.64
  -7   4  -2  125.76    8.11
   4   6   7  451.78   28.33
  -4   6  -7  448.77   28.11
  -4   6  -7  425.98   26.87
   4   6   7  446.53   27.99
  -3  13   3   52.55    2.71
  -3  13   3   53.71    2.64
  -4  -2   8    5.67    1.04
  -2   3   9  166.08   11.15
  -6   9   0    1.51    0.75
  -6   9   0    1.50    0.73
  -4  11  -4   69.58    3.31
  -4  11  -4   73.91    3.58
  -2   7  -8  796.43   50.14
   2   7   8  739.33   46.17
  -2   7  -8  779.90   49.82
   2   7   8  786.58   49.30
   2   7   8  778.24   48.55
  -7   5  -1  329.61   20.92
   1  10   7   28.45    1.69
  -1  10  -7   30.64    1.74
   7   2   3   31.56    1.85
  -7   2  -3   23.55    1.84
  -7  -2  -3   30.33    1.79
  -7   2  -3   30.03    1.76
  -1   8   8  255.93   16.20
   1   8  -8  252.44   16.29
  -1   8   8  254.60   16.02
  -6   4  -5    5.94    0.77
   6   4   5    6.49    0.77
  -6   4  -5    5.65    0.77
  -6  -4  -5    6.30    0.78
  -5   0  -7   -0.60    0.48
  -5   0  -7   -0.08    0.51
   5   0   7    0.07    0.50
  -1  15   0  465.07   29.10
   1  15   0  455.38   28.56
  -1  15   0  456.51   28.70
  -3  10  -6  481.80   30.29
  -2  11  -6  416.43   26.18
   2  11   6  428.95   26.91
  -2  11  -6  437.67   27.50
  -3  13  -3   28.54    1.57
   0   5  -9   35.83    1.92
   0   5   9   32.97    2.02
   0   5   9   33.31    1.79
   0   5   9   34.79    1.81
   4   0   8  521.16   32.94
  -4   0  -8  526.01   32.91
  -4   0  -8  566.45   36.40
  -7  -3   3  623.20   39.93
  -7   3   3  643.58   40.24
   5  -1   7  210.98   13.41
  -5   1  -7  233.18   15.00
   5   1   7  223.90   14.19
  -5   1  -7  219.99   13.91
  -5  -1  -7  215.87   13.62
  -6   9   1  167.29   10.72
  -6   9   1  156.97   10.05
  -4  10  -5  255.04   16.06
  -4  10  -5  281.94   17.80
   1   8   8  128.90    8.28
   1   8   8  117.94    5.72
  -1   8  -8  130.55    8.56
  -1   8  -8  135.35    8.65
   1   8   8  127.16    8.23
  -4   1  -8  324.12   21.15
   4   1   8  324.59   20.52
   4  -1   8  312.35   19.78
  -4  -1  -8  317.94   19.99
  -4   1  -8  325.13   20.44
  -4  12   3  604.50   37.92
  -4  12   3  640.36   40.00
  -6   9  -1   98.16    4.66
  -6   9  -1   94.54    4.45
  -2  -3  -9  130.50    8.40
   2   3   9  118.81    5.91
   2   3   9  124.12    7.97
  -2   3  -9  124.28    7.99
   2   3   9  130.91    8.40
  -5   8  -5  464.90   29.24
  -5   8  -5  466.99   29.25
   1  15  -1  197.11   12.59
  -1  15   1  204.31   12.94
  -1  15   1  197.40   12.50
  -5  -3   7   45.87    2.69
  -5   3   7   44.27    2.54
  -1  15  -1  174.34   11.12
   1  15   1  153.82    9.82
  -1  15  -1  152.98    9.79
  -5   6  -6 1039.52   64.70
  -5  -6  -6 1050.87   65.36
  -5   6  -6 1028.56   66.75
  -3   6   8  146.64    9.36
  -3   6   8  141.43    9.23
   0  13  -5   44.80    2.32
   0  13  -5   44.19    2.28
   0  13   5   44.88    2.37
  -6   8   3   80.38    3.89
  -6  -8   3   88.04    4.60
  -5  11   2   40.09    2.15
  -5 -11   2   42.11    2.49
  -6   5   5   59.38    3.10
  -6  -5   5   55.26    3.14
  -1   5   9  665.93   42.19
  -1   5   9  685.91   42.84
  -3  14   0  294.07   18.52
  -3  14   0  304.93   19.26
   3  14   0  314.82   20.09
  -4   3   8   53.80    2.90
  -4  -3   8   61.38    3.25
  -5  -2  -7 1377.98   85.69
   5  -2   7 1272.11   79.82
  -5   2  -7 1194.48   75.32
   5   2   7 1407.51   87.56
  -5   2  -7 1222.03   77.11
  -4  12  -3   31.06    1.72
  -4  12  -3   29.79    1.70
  -4   2  -8    1.02    0.53
  -4   2  -8    1.65    0.56
   4   2   8    1.21    0.44
  -4  -2  -8    1.70    0.47
   7   3   3  161.24   10.37
  -7   3  -3  124.81    8.10
  -7  -3  -3  162.70   10.41
  -7   3  -3  160.10   10.22
  -7  -5   2  498.87   31.83
  -7   5   2  493.89   31.18
  -5  11  -2   37.80    2.09
  -5  11  -2   38.20    2.01
  -6   7   4  521.35   32.89
  -6  -7   4  503.28   32.28
   1   5   9  334.63   21.53
  -1   5  -9  380.15   23.95
   1   5   9  355.21   22.29
   1   5   9  375.07   23.68
  -4  13   0   49.62    2.49
  -4  13   0   49.53    2.63
  -2  14   3   12.35    1.04
  -2  14   3   11.98    0.83
   2  14  -3   11.49    0.93
  -6   0   6   58.94    3.15
   0  12  -6   18.77    1.21
   0  12   6   17.40    1.18
  -4   9   6  253.26   16.03
   3  14  -1  577.04   36.01
  -3  14   1  606.53   38.25
  -3  14   1  558.58   35.04
  -2   4   9 1076.62   68.37
  -2   4   9 1137.35   71.08
   0  15  -2  287.00   19.60
   0  15   2  312.82   19.71
   0  15  -2  295.85   18.58
  -6   8  -3    2.36    0.70
  -4   7   7  367.59   23.35
  -3  14  -1  212.57   13.49
   3  14   1  221.69   14.22
  -3  14  -1  219.82   13.83
  -6  -1   6   25.04    1.76
  -6   1   6   24.99    1.72
  -2  14  -3  144.20    9.19
   2  14   3  145.91    9.35
  -2  14  -3  141.01    9.08
   1  13  -5    1.19    0.57
  -1  13   5    0.96    0.60
   1  13  -5    1.31    0.61
  -7   6   0    1.33    0.84
  -7   6   0    1.90    0.78
   0  14  -4  627.13   39.36
   0  14  -4  610.69   38.13
   0  14   4  627.73   39.21
   3   6   8  537.17   33.74
  -3   6  -8  554.93   35.53
   3   6   8  493.17   31.66
  -3   6  -8  569.73   35.88
  -4  13   1  145.29    9.32
  -4  13   1  137.89    8.79
  -7   5  -2  412.43   26.05
  -7   5  -2  411.94   25.97
  -1  13  -5   12.59    0.92
   1  13   5   11.83    0.95
  -7  -4   3  169.83   11.08
  -7   4   3  169.93   11.09
  -6   9   2    1.36    0.80
  -6  -9   2    0.38    0.83
  -6   9   2    0.77    0.80
  -4  13  -1  659.81   41.15
  -6   5  -5  135.00    8.62
  -6  -5  -5  144.82    9.25
  -6   5  -5  144.36    9.28
  -5   3  -7  423.63   26.51
  -5   3  -7  456.47   28.77
  -5  -3  -7  426.15   26.63
   5   3   7  407.74   25.98
  -7   0   4    5.97    0.96
  -7   6   1  119.71    5.64
  -7  -6   1  120.89    5.94
  -7   6   1  122.98    6.73
  -2  -4  -9    5.08    0.62
   2   4   9    6.77    0.70
   2   4   9    6.44    0.91
  -2   4  -9    6.60    0.75
   2   4   9    7.12    0.69
   1  12  -6   74.70    3.60
  -1  12   6   71.69    3.51
   1  12  -6   69.41    3.50
  -5  -4   7  298.64   19.54
  -6  -2   6   -0.11    0.89
  -6   2   6    0.02    0.90
  -6   7  -4    0.95    0.63
  -6  -7  -4    1.43    0.69
  -6   7  -4    1.45    0.59
  -3   0   9   -0.13    0.79
  -2  10   7   46.57    2.30
  -2  10   7   45.49    2.47
  -4  -3  -8  114.99    5.20
  -4   3  -8  117.79    5.59
  -4   3  -8  112.82    5.19
   4   3   8  111.40    5.18
  -7  -1   4  137.22    8.93
  -7   1   4  139.80    9.22
  -1  15   2  260.53   16.47
  -1  15   2  257.44   16.28
   1  15  -2  252.17   15.90
  -5   7   6  565.50   36.27
  -5  -7   6  610.07   40.21
  -6   9  -2   63.82    3.14
  -6   9  -2   64.89    3.20
  -7   6  -1  540.16   34.03
  -1  15  -2  560.63   35.08
   1  15   2  573.07   35.77
  -1  15  -2  555.59   34.95
  -4   9  -6  778.62   48.97
  -4   9  -6  775.31   48.42
  -1  12  -6  449.22   28.67
   1  12   6  436.50   27.32
  -1  12  -6  430.93   27.11
  -3   9   7   80.04    3.95
  -3   9   7   89.49    4.22
  -3   1   9  615.48   38.77
  -4   4   8    0.19    0.92
  -4  -4   8    0.50    0.88
  -1  14   4   35.76    1.98
   1  14  -4   36.40    1.98
  -2   8   8  237.62   15.09
  -2   8   8  247.60   15.60
   0   6  -9    0.35    0.55
   0   6   9    0.22    0.73
   0   6   9    0.34    0.39
   0   6   9    0.55    0.37
  -4   7  -7  212.16   13.39
  -4   7  -7  196.40   12.82
  -5  10   4  188.49   12.04
  -5  10   4  182.50   11.65
  -5 -10   4  180.21   12.28
  -7   4  -3   86.94    5.26
   7   4   3  112.59    5.35
  -7   4  -3  108.27    5.03
  -7  -4  -3  106.41    5.00
   1  14   4   45.20    2.33
  -1  14  -4   42.47    2.25
  -1  14  -4   45.50    2.31
  -6   0  -6  213.00   13.51
   6   0   6  232.54   14.75
  -2  10  -7  737.80   47.02
   2  10   7  692.80   43.22
  -2  15   0   18.28    1.22
  -2  15   0   17.57    1.09
   2  15   0   17.88    1.16
  -7   2   4   11.45    1.12
  -7  -2   4   12.26    1.15
  -6   1  -6  117.52    5.78
   6  -1   6  106.97    5.07
   6   1   6  117.58    5.48
  -6   1  -6  113.13    5.19
  -6  -1  -6  115.98    5.29
  -3  14   2  122.04    6.83
  -3  14   2  124.59    7.95
  -3  12   5   31.24    1.76
  -3  12   5   33.31    1.94
   0   9  -8   36.29    2.01
   0   9   8   33.69    1.96
   0   9  -8   35.83    1.96
  -3   2   9 1107.47   70.36
  -7   0  -4 1562.43   97.04
   7   0   4 1633.21  101.77
   2   8   8   28.42    1.71
  -2   8  -8   29.72    1.71
  -2   8  -8   28.69    1.77
  -3   9  -7   57.50    3.21
  -3   9  -7   54.78    3.11
  -6   6   5   76.83    3.20
  -6  -6   5   69.47    3.20
  -3  14  -2   31.15    1.98
   3  14   2   34.54    2.11
  -3  14  -2   33.32    1.98
  -6   3   6    1.29    0.92
  -6  -3   6    1.74    0.91
   3   0   9   -0.11    0.47
  -3   0  -9    0.09    0.50
  -1   6   9  620.19   21.04
  -1   6   9  639.95   22.99
  -2  15   1   50.14    2.94
  -2  15   1   47.70    2.69
   2  15  -1   48.52    2.82
  -4  13   2  132.08    4.96
  -4  13   2  131.67    4.81
  -5   9   5   69.14    2.95
  -5  -9   5   68.87    3.02
  -2  15  -1  242.57    8.76
  -2  15  -1  241.67    8.44
   2  15   1  247.32    8.78
  -2   5   9  179.37    6.33
  -2   5   9  178.88    6.55
  -7   1  -4   49.97    3.38
   7   1   4   58.18    3.39
  -7   1  -4   51.69    2.99
   7  -1   4   54.78    3.22
  -7  -1  -4   55.32    3.17
  -5  10  -4   28.71    1.82
  -5  10  -4   29.42    1.88
  -5  11   3    2.94    0.72
  -5  11   3    2.32    0.75
  -5 -11   3    2.41    0.88
  -3  -1  -9 1317.74   45.77
  -3   1  -9 1364.10   38.46
   3   1   9 1295.10   44.31
   0  11  -7   63.54    2.60
   0  11  -7   57.99    3.28
   0  11   7   61.45    2.35
  -5   7  -6  400.52   14.59
  -5   7  -6  401.94   13.74
  -5   4  -7  131.25    4.77
  -5  -4  -7  122.19    5.30
  -5   4  -7  137.08    5.38
  -7   6   2 1310.44   44.73
  -7  -6   2 1272.64   45.14
  -3  13   4  115.54    4.38
  -3  13   4  110.43    4.17
  -3   7   8 1078.31   37.00
  -3   7   8 1069.89   36.10
  -4  13  -2   46.94    2.68
  -4  13  -2   42.84    2.63
  -6   2  -6  116.81    5.41
  -6  -2  -6  120.18    4.41
  -6   2  -6  116.42    4.30
   6   2   6  126.50    4.77
   6  -2   6  114.22    4.38
  -3  12  -5    6.28    0.84
  -3  12  -5    5.96    0.71
   1   6   9   20.79    1.39
   1   6   9   19.23    1.44
  -1   6  -9   20.81    1.43
   1   6   9   21.25    1.42
  -4  -4  -8   43.04    2.44
  -4   4  -8   45.65    2.61
  -4   4  -8   46.63    2.74
  -1   9   8   11.89    1.17
   1   9  -8   13.20    1.10
  -7   5   3  103.41    4.10
  -7  -5   3  108.18    4.47
  -5  12   0  113.23    4.32
  -5  12   0   98.42    3.75
  -3  11   6   18.94    1.48
  -7  -3   4  446.47   16.17
  -7   3   4  435.83   15.99
  -6  10   0   97.00    3.78
  -6  10   0   92.54    3.65
  -7   2  -4   18.98    1.64
   7   2   4   22.80    1.62
  -7   2  -4   21.31    1.50
  -7  -2  -4   24.23    1.68
  -5  11  -3   -0.48    0.58
  -5  11  -3    0.13    0.62
  -3  13  -4   63.34    2.38
  -3  13  -4   55.43    3.11
   1   9   8   21.20    1.54
  -1   9  -8   21.19    1.48
  -1   9  -8   24.61    1.58
  -2   5  -9   18.90    1.40
   2   5   9   18.49    1.46
   2   5   9   19.32    1.35
   2   5   9   18.70    1.28
  -2   5  -9   20.04    1.32
  -2  13   5  252.66    8.71
   2  13  -5  240.99    8.73
  -2  13   5  237.97    8.65
  -7   6  -2   89.67    3.49
  -5  -5   7  498.63   18.17
  -4  11   5   54.53    3.19
  -4  11   5   56.37    3.32
  -3  -2  -9  551.18   18.78
  -3   2  -9  546.19   18.93
   3   2   9  544.81   18.68
  -3   3   9    7.88    1.17
   0  15  -3  523.15   17.80
   0  15   3  542.79   18.39
   0  15  -3  541.34   18.67
  -1  11   7   75.39    3.10
   1  11  -7   70.50    2.87
  -5  12   1    2.21    0.59
  -4  12   4    2.86    0.81
  -4  12   4    2.28    0.65
  -5   9  -5   10.46    1.01
  -6   6  -5   64.74    2.63
  -6  -6  -5   68.34    2.78
  -6   6  -5   66.84    2.76
  -4   5   8   28.10    2.00
  -4  -5   8   27.51    2.09
  -6  10   1    7.56    0.86
  -6  10   1    7.99    1.00
  -5  12  -1    4.47    0.74
  -5  12  -1    4.44    0.83
  -6   9   3  107.45    4.19
  -6   9   3  100.49    3.98
  -6  -9   3  101.15    4.43
  -7   7   0  897.06   30.39
  -7   7   0  949.19   32.70
  -6  -8   4  154.67    6.29
  -6   8   4  158.79    5.87
  -2  13  -5   36.51    2.52
  -2  13  -5   47.15    2.71
   2  13   5   57.82    3.30
   1  11   7  397.28   13.64
  -1  11  -7  417.69   14.57
  -3   7  -8  123.08    4.62
   3   7   8  120.29    4.61
  -3   7  -8  126.35    4.67
  -7  -5  -3  319.50   11.17
  -7   5  -3  296.70   10.49
  -7   5  -3  300.71   10.50
  -2  12   6   28.97    1.93
  -2  12   6   25.59    1.63
  -6  10  -1  168.34    6.10
  -6  10  -1  175.48    6.32
  -6   3  -6    4.18    0.80
  -6  -3  -6    4.95    0.69
  -6   3  -6    5.45    0.71
  -3  11  -6  549.57   19.06
  -3  11  -6  542.40   19.35
  -4   8   7    6.78    1.03
  -6   4   6   56.41    3.45
  -6  -4   6   55.87    3.39
  -7   7   1   10.11    1.17
  -7   7   1    8.87    1.02
  -2  15   2   10.33    0.82
  -2  15   2   10.88    1.04
   2  15  -2   11.15    0.98
  -4  12  -4    2.85    0.78
  -4  12  -4    1.78    0.56
  -4  11  -5   38.91    2.30
  -4  11  -5   39.47    2.37
   1  15  -3   68.22    2.75
  -1  15   3   67.48    2.74
  -2  15  -2    8.23    0.93
   2  15   2    7.11    0.74
  -2  15  -2    6.08    0.68
   2  14  -4 1085.43   38.62
  -2  14   4 1117.90   37.90
  -2  14   4 1080.52   36.11
   1  15   3  231.71    8.17
  -1  15  -3  187.03    6.90
  -1  15  -3  200.23    7.19
  -7   3  -4   20.59    1.49
  -7   3  -4   17.09    1.27
  -7  -3  -4   17.69    1.34
   2  12   6  837.25   28.30
  -2  12  -6  814.30   29.52
  -2  12  -6  770.15   26.21
  -7   7  -1  123.22    4.66
  -7   7  -1  129.83    4.86
  -6   9  -3   83.21    3.24
  -6   9  -3   85.55    3.38
  -3  -3  -9  176.49    6.35
   3   3   9  183.60    6.65
  -3   3  -9  184.45    6.60
  -3   3  -9  187.43    6.76
   0   1 -10   38.02    2.53
   0   1  10   40.74    2.58
   0   7  -9  159.61    7.13
   0   7   9  179.79    6.86
  -2  14  -4   25.38    1.89
   2  14   4   31.80    1.93
  -2  14  -4   30.84    1.87
  -6   8  -4    2.42    0.64
  -6  -8  -4    2.63    0.67
  -5  -5  -7  200.27    7.10
  -5   5  -7  199.36    7.14
  -5   5  -7  207.71    7.91
  -7   4   4  192.37    7.15
  -7  -4   4  210.09    7.87
  -4  10   6   44.67    2.80
  -5  -8   6   14.04    1.43
  -5   8   6   14.19    1.34
  -3  14   3    5.71    0.63
  -3  14   3    5.57    0.86
  -3   4   9   56.51    3.35
  -3  -4   9   59.07    3.53
   4   5   8  346.39   12.84
  -4   5  -8  372.39   13.57
  -4   5  -8  351.37   12.04
  -2   6   9   18.35    1.22
  -2   6   9   19.20    1.54
  -5  12   2  109.35    4.12
  -1   0  10   45.57    2.82
  -4   8  -7   74.22    2.90
  -4   8  -7   71.19    2.94
  -4  13   3  258.34    8.97
  -4  13   3  279.60    9.79
   0  16   0  204.93    7.35
   0  16   0  194.70    7.22
  -6  10   2  681.54   23.59
  -6  10   2  642.03   21.75
  -3  14  -3    6.15    0.70
   0   2 -10   99.99    3.83
   0   2  10   88.63    3.60
  -6   7   5    4.62    1.09
  -6  -7   5    5.01    0.95
  -1  -1  10    7.37    1.00
  -1   1  10    6.45    0.97
  -1   7   9  230.77    8.50
  -7  -6   3   63.51    2.97
  -7   6   3   59.78    3.48
  -5  12  -2   39.91    2.35
  -5  12  -2   45.58    2.71
  -6  -4  -6   78.86    3.07
  -6   4  -6   76.01    4.34
  -6   4  -6   75.19    2.95
  -1   0 -10  430.80   15.50
  -2   9   8   72.10    3.01
  -7  -7   2  208.38    8.13
  -7   7   2  197.03    7.22
  -4  13  -3   41.16    2.39
  -4  13  -3   44.48    2.64
  -6  10  -2   62.25    2.28
  -6  10  -2   64.74    2.67
   1   7   9    0.40    0.38
  -1   7  -9    0.72    0.54
   1   7   9    0.66    0.69
  -1   1 -10  106.69    6.55
  -1  -1 -10  175.01   12.85
  -2   6  -9  403.60   14.32
  -2   6  -9  380.42   13.23
   2   6   9  373.67   13.28
  -4  10  -6  317.23   11.01
  -3  10   7   68.40    2.91
   0  16  -1    8.84    0.82
   0  16  -1    7.33    0.78
   0  16   1    9.71    0.97
  -5  -6   7    1.43    0.90
  -5   6   7    0.99    0.83
   0  14  -5   22.11    1.54
   0  14  -5   20.17    1.40
   0  14   5   21.26    1.51
  -7  -4  -4   37.22    2.29
  -7   4  -4   38.35    2.46
  -7   4  -4   37.46    2.31
  -1   2  10  156.78    6.52
  -6  -5   6  231.49    9.23
  -6   5   6  239.02    8.98
  -3   4  -9 1006.29   36.47
   3   4   9  922.67   35.05
   3   4   9  997.06   33.60
  -3   4  -9 1004.61   34.10
  -2  11   7    1.16    0.63
  -5   8  -6    0.93    0.62
  -5   8  -6    0.73    0.63
   0  13   6   48.22    2.83
   0  13  -6   47.84    2.81
   0  13  -6   47.06    2.75
  -4  -6   8   53.78    3.28
  -4   6   8   49.87    3.13
  -5   0   8  308.45   11.33
  -7   0   5    0.04    0.85
  -3   8   8  401.56   13.84
  -3   8   8  398.12   13.74
   1  16   0  208.91    7.35
  -1  16   0  229.17    8.13
  -1  16   0  210.27    7.45
  -2   9  -8   15.10    1.21
  -2   9  -8   14.49    1.07
   2   9   8   14.52    1.17
  -7   7  -2  411.65   14.67
  -7  -6  -3  239.68    8.66
  -7   6  -3  230.24    8.16
  -7   6  -3  236.16    8.33
  -5  -1   8   24.53    1.87
  -5   1   8   23.10    1.81
  -7  -1   5  120.31    4.75
  -7   1   5  117.63    4.55
   0   3 -10   16.25    1.21
   0   3  10   14.47    1.36
  -1   2 -10    1.34    0.52
  -1  -2 -10    0.79    0.52
   1   2  10    1.52    0.78
  -4  14   0  258.19    9.37
  -4  14   0  256.59    8.93
  -8   0   0 2131.99   61.49
   0  10  -8    8.57    0.84
   0  10   8    9.79    1.03
   0  10  -8   10.25    1.04
  -5  11   4   43.11    2.66
  -5 -11   4   44.97    2.82
  -5  11   4   43.72    2.64
   3  15   0   15.74    1.20
  -3  15   0   15.62    1.12
  -3  15   0   16.81    1.34
  -6  -7  -5    5.05    0.72
  -6   7  -5    3.62    0.77
  -6   7  -5    3.94    0.69
  -2  11  -7    6.27    0.80
  -3  10  -7   74.47    3.03
  -8  -1   0   58.42    3.84
  -8   1   0   59.42    3.45
  -1  16   1   70.46    2.77
   1  16  -1   72.33    2.86
  -1  16   1   69.94    2.85
  -1  16  -1   70.43    2.91
   1  16   1   66.80    2.70
  -1  16  -1   69.70    2.76
   1  14  -5   11.57    1.08
   1  14  -5   12.38    1.05
  -1  14   5   12.61    1.09
  -5 -10   5    0.08    0.81
  -5  10   5    0.77    0.90
  -7   5   4  107.15    4.19
  -7  -5   4  110.96    4.52
  -8   0   1    0.44    0.68
   1  13  -6   75.33    2.99
   1  13  -6   77.36    3.26
  -1  13   6   76.98    3.10
   2  15  -3   11.75    0.98
  -2  15   3   12.74    1.15
  -2  15   3   12.59    0.92
  -4  14   1  450.24   15.30
  -4  14   1  472.14   16.18
  -1  14  -5   58.87    3.30
  -1  14  -5   56.32    3.22
   1  14   5   62.58    2.27
  -3   5   9  442.87   15.94
  -3  -5   9  440.24   17.73
  -5  -2   8   89.02    3.73
  -5   2   8   81.76    3.80
  -3  15   1  101.88    4.00
   3  15  -1  101.28    3.66
  -3  15   1   98.10    3.63
  -7   2   5    1.76    0.90
  -7  -2   5    1.74    0.94
  -7   8   0  479.81   16.76
  -7   8   0  477.16   16.40
  -8  -1   1    6.71    0.87
  -8   1   1    6.16    0.92
  -4  14  -1   10.06    0.75
  -3   8  -8  115.66    4.25
  -3   8  -8  113.02    4.27
   1  13   6    0.40    0.52
  -1  13  -6    0.81    0.52
  -1   3  10   54.30    3.39
  -3  15  -1  103.97    3.68
  -3  15  -1  103.83    3.77
   3  15   1  108.71    4.04
   2  15   3   50.58    1.94
  -2  15  -3   47.92    1.78
  -2  15  -3   48.86    1.88
  -8   0  -1    0.01    0.67
  -1  10   8   48.36    2.05
  -5   6  -7    7.39    0.83
  -5   6  -7    7.49    0.80
  -5  11  -4   36.16    1.59
  -5  11  -4   36.09    1.52
   0  15  -4    0.68    0.59
   0  15   4    0.46    0.59
   0  15  -4   -0.01    0.55
  -8   2   0   37.82    1.74
  -8  -2   0   40.01    1.81
  -8   1  -1  333.39   11.57
  -8   1  -1  334.80   11.32
  -8  -1  -1  347.67   11.93
  -4   6  -8   25.83    1.29
  -4   6  -8   24.50    1.15
  -7   8   1    0.33    0.70
  -7   8   1    0.07    0.80
   0  16  -2  138.48    4.98
   0  16  -2  130.41    4.55
   0  16   2  136.62    4.82
  -6  -5  -6  199.72    6.71
  -6   5  -6  155.41    5.92
  -6   5  -6  179.17    6.14
  -6  -9   4  402.28   14.72
  -6   9   4  396.86   13.03
  -1  10  -8    0.18    0.63
   1  10   8    0.06    0.56
  -1  10  -8   -0.15    0.51
   1   3  10  144.63    5.59
  -1  -3 -10  144.42    5.49
  -1   3 -10   84.85    9.83
  -7   0  -5    0.20    0.58
   7   0   5    0.18    0.52
  -2   0  10   26.24    1.60
  -6   0   7    0.05    0.84
  -8  -2   1  178.90    6.69
  -8   2   1  170.67    6.06
  -5   0  -8   13.17    0.84
   5   0   8   12.14    0.89
  -7   8  -1   83.85    3.22
  -7   8  -1   83.04    3.20
  -4   9   7   -0.35    0.74
  -4   1   9    2.53    0.95
   7  -1   5  383.24   12.66
  -7   1  -5  362.31   11.90
  -7  -1  -5  369.89   12.02
  -5  12   3    8.61    0.97
  -5  12   3    8.48    0.82
  -3  13   5    2.61    0.53
  -3  13   5    3.04    0.71
  -5  10  -5  716.45   23.30
   0  12  -7   56.43    2.05
   0  12   7   61.55    2.51
  -2   1  10   10.20    1.09
  -2  -1  10    9.15    1.09
  -6   1   7   73.50    3.12
  -6  -1   7   71.43    3.14
  -2   7   9  410.19   13.95
  -6  11   0   62.36    2.56
  -6  11   0   59.18    2.21
  -7   5  -4  173.96    5.93
  -7   5  -4  147.55    7.30
  -7  -5  -4  180.10    6.26
  -6  10   3  226.71    7.73
  -6 -10   3  244.40    8.89
  -6  10   3  244.78    8.25
  -5   1  -8   15.92    0.91
   5  -1   8   16.44    1.00
  -5  -1  -8   16.03    0.88
   0   4  10   26.68    1.19
   0   4 -10   26.98    1.40
   0   4  10   26.08    1.39
   0   8   9    1.62    0.75
   0   8  -9    2.02    0.63
   3   5   9  752.38   26.42
  -3   5  -9  783.89   25.70
   3   5   9  754.04   24.26
  -3   5  -9  777.65   27.11
  -8   2  -1   95.77    3.66
  -8   2  -1   96.64    3.68
  -5  -3   8  522.50   17.27
  -7   3   5  850.55   27.81
  -7  -3   5  871.13   28.36
  -1  15   4   63.91    2.57
   1  15  -4   63.10    2.51
   1  15   4  434.33   14.07
  -1  15  -4  416.26   13.64
  -1  15  -4  429.85   14.11
  -3  12   6  111.82    4.05
  -3  12   6  114.88    4.21
  -7   7   3   28.28    1.50
  -7  -7   3   25.83    1.55
   1  16  -2   62.57    2.45
  -1  16   2   58.16    2.13
  -1  16   2   59.91    2.53
  -6  11   1   61.05    2.52
  -6  11   1   56.67    2.16
  -8   0   2 2214.02   80.61
  -5  12  -3   40.86    1.68
  -5  12  -3   41.04    1.64
  -3  13  -5  115.66    4.20
  -3  13  -5  112.64    4.01
  -1  16  -2  347.74   11.51
  -1  16  -2  340.36   11.16
   1  16   2  357.23   11.70
  -4  -2   9   18.23    1.33
  -4   2   9   16.49    1.27
  -8   3   0  525.09   17.46
  -7   2  -5  400.38   12.97
  -7  -2  -5  397.55   12.90
  -7   2  -5  317.83   12.01
  -2   0 -10   83.13    3.04
  -6  -6   6  252.37    8.96
  -6   6   6  261.32    9.19
  -4  12   5    6.23    0.91
  -4  12   5    5.33    0.69
  -6   9  -4   76.29    2.98
  -4  14   2    5.47    0.88
  -4  14   2    5.58    0.62
  -2   2  10   24.75    1.41
  -2  -2  10   24.15    1.48
  -6   2   7  105.63    4.11
  -6  -2   7  100.27    4.19
   1  12  -7   99.53    3.68
   1  12  -7  106.07    3.95
  -1  12   7  103.95    3.86
  -8   1   2    8.26    0.99
  -8  -1   2    8.57    0.95
  -5  13   0   13.83    0.91
  -6  11  -1  588.92   18.95
  -6  11  -1  595.16   19.23
  -5  -9   6  109.27    4.38
  -5   9   6  113.25    4.21
  -5  -2  -8   35.66    1.43
  -5   2  -8   38.31    1.70
  -5   2  -8   34.53    1.46
  -3  15   2   19.24    0.97
  -3  15   2   19.20    1.24
  -2   7  -9   89.97    3.33
  -2   7  -9   86.72    3.24
   2   7   9   92.00    3.57
  -6  -8   5  888.57   29.25
  -6  10  -3  115.74    4.13
  -6  10  -3  116.45    4.25
  -1   4  10   74.56    3.05
  -2   1 -10    6.14    0.65
  -2  -1 -10    3.21    0.63
  -5  -7   7   30.19    1.76
  -5   7   7   28.76    1.65
  -1   8   9   21.41    1.35
  -3  14   4   45.67    1.72
  -3  14   4   46.66    1.97
  -4  14  -2    6.05    0.64
  -8   3   1  110.33    4.14
  -8  -3   1  117.58    4.53
  -2  16   0  256.31    8.48
   2  16   0  273.06    9.38
  -2  16   0  255.22    8.49
   1  12   7  162.63    5.66
  -1  12  -7  161.22    5.56
  -1  12  -7  173.41    6.03
  -3  15  -2   38.02    1.64
   3  15   2   38.59    1.63
  -3  15  -2   38.49    1.53
  -4   9  -7    0.18    0.59
  -4   9  -7    0.03    0.66
  -4   7   8   36.15    1.82
  -4  -7   8   34.98    2.00
  -7   8   2    0.07    0.70
  -7   8   2    0.02    0.73
  -8   0  -2 1280.69   46.44
  -8   0  -2 1242.99   40.05
  -4   0  -9   -0.30    0.45
   4   0   9    0.49    0.51
  -5  13   1   16.77    1.01
  -3  12  -6   28.05    1.26
  -3  12  -6   28.24    1.37
  -4  13   4   14.76    0.94
  -4  13   4   15.82    1.19
  -1   8  -9  277.89   10.02
  -1   8  -9  277.44    9.38
   1   8   9  272.45    9.23
   1   4  10  365.64   11.95
   1   4  10  346.66   12.94
  -1   4 -10  286.22   10.89
  -8   3  -1   77.38    3.06
   8   3   1   77.28    3.26
  -8   3  -1   78.17    3.08
  -7  -7  -3    9.82    0.98
  -7   7  -3    9.80    0.94
  -7   6   4  154.17    5.62
  -7  -6   4  151.06    5.65
  -8  -1  -2   12.76    1.14
  -8   1  -2   14.50    1.08
  -8   1  -2   11.73    1.03
  -4   1  -9   38.44    1.52
  -4  -1  -9   37.14    1.44
  -8   2   2   49.71    2.07
  -8  -2   2   53.04    2.24
  -5  13  -1   89.52    3.28
  -5  13  -1   97.26    3.61
  -3  14  -4   13.31    0.91
  -4  12  -5    0.30    0.56
  -4  12  -5    0.03    0.63
  -2   2 -10   41.49    1.60
  -2  -2 -10   35.58    1.72
  -2  14   5  217.67    7.38
   2  14  -5  218.92    7.55
  -6   0  -7    0.15    0.61
  -3   6   9  287.97    9.71
   2  16  -1   41.77    1.72
  -2  16   1   41.08    1.73
  -2  16   1   38.66    1.48
  -4  11   6  163.56    5.77
   2  16   1    2.38    0.52
  -2  16  -1    2.28    0.65
  -2  16  -1    2.03    0.51
  -2  13   6  454.49   14.96
  -4   3   9  336.10   11.30
  -4  -3   9  363.36   14.02
  -7   3  -5    1.57    0.60
  -7  -3  -5    2.43    0.65
  -7   3  -5    2.14    0.66
  -6  -1  -7  134.66    4.67
  -6   1  -7  131.68    4.56
   6  -1   7  135.49    4.87
  -7   8  -2  295.45    9.87
  -7   8  -2  284.02    9.64
  -2   3  10 1275.85   44.90
  -2  -3  10 1217.80   46.17
  -6  -3   7   -0.01    0.85
  -6   3   7    0.82    0.91
  -5  -4   8   32.40    1.86
  -7  -4   5  144.13    5.61
  -7   4   5  148.15    5.33
  -4  13  -4   12.46    0.82
  -4  13  -4   13.41    1.03
  -5  -3  -8  106.86    3.81
  -5   3  -8  116.89    4.09
  -5   3  -8  130.41    4.76
  -2  14  -5    1.19    0.60
  -2  10   8   14.69    1.11
  -5   9  -6    0.76    0.64
  -5   9  -6    0.35    0.60
  -6   8  -5   61.16    2.42
  -6   8  -5   57.78    2.18
  -8   2  -2   27.74    1.41
  -8  -2  -2   27.21    1.49
  -8   2  -2   29.69    1.47
  -4  -2  -9  293.92    9.90
  -4   2  -9  302.22   10.01
  -4   2  -9  300.02   10.74
  -3   9   8   72.41    2.95
  -6  11   2   40.99    1.76
  -6  11   2   44.45    1.90
  -6   6  -6    5.13    0.75
  -6   6  -6    6.33    0.77
  -2  13  -6   71.25    2.79
  -2  13  -6   67.87    2.60
   0   5  10   70.20    2.88
   0   5 -10   79.81    3.08
  -8   4   0  227.79    7.79
  -8   4   0  250.43    8.57
  -5   7  -7  556.28   19.14
  -5   7  -7  543.72   17.82
  -6  -2  -7  384.26   12.46
  -6   2  -7  388.11   12.58
   0  16  -3  291.60    9.82
   0  16  -3  281.36    9.55
   0  16   3  289.86    9.60
  -4   7  -8   33.68    1.40
  -4   7  -8   35.08    1.55
  -8   3   2   15.24    1.23
  -8  -3   2   16.56    1.15
  -7   6  -4   51.40    2.27
  -7   6  -4   53.76    2.08
  -7  -6  -4   53.14    2.19
  -8   4   1  283.66    9.67
  -6  11  -2   57.47    2.11
  -6  11  -2   54.96    2.14
  -2  10  -8  124.78    4.47
  -2  10  -8  124.12    4.45
  -4  11  -6    0.63    0.48
  -4  11  -6    0.23    0.62
  -3  11   7 1032.19   32.84
   2   3  10  438.40   15.53
  -2   3 -10  453.87   15.78
   3   6   9  338.24   11.45
  -3   6  -9  352.78   11.77
  -3   6  -9  347.10   11.59
  -5  13   2   66.22    2.74
  -5  13   2   63.25    2.48
  -1   5  10  293.95   10.33
  -8   4  -1  483.90   15.95
  -8   4  -1  503.31   16.47
  -2  15   4  362.01   12.00
   2  15  -4  333.90   10.99
  -7   9   0  598.05   19.34
  -7   9   0  602.46   19.73
  -3   9  -8  168.01    6.10
  -3   9  -8  177.36    6.02
  -8   0   3    0.12    0.79
  -8   3  -2    5.99    0.79
  -8   3  -2    4.77    0.87
  -4   3  -9  493.12   17.48
  -4  -3  -9  490.58   15.86
  -4   3  -9  498.07   16.11
  -2  16   2    3.76    0.49
   2  16  -2    3.55    0.58
  -2  16   2    3.82    0.72
  -5  13  -2  278.79    9.50
  -5  13  -2  262.50    8.69
  -1   5 -10   14.54    0.95
   1   5  10   13.80    1.11
  -4   4   9  273.34   10.20
  -4  -4   9  279.95   10.16
  -2  15  -4   13.33    0.92
  -2  15  -4   13.05    0.85
  -7  -4  -5  376.94   12.60
  -7   4  -5  355.57   11.60
  -7   4  -5  246.07   11.91
   0  11   8    0.57    0.63
   0  11  -8    0.33    0.65
   1  16  -3    0.90    0.55
  -1  16   3    0.93    0.58
  -2  12   7   19.01    1.21
  -2  16  -2   66.64    2.51
   2  16   2   70.43    2.75
  -2  16  -2   70.70    2.82
  -2   4  10   60.49    2.79
  -6  -4   7   92.62    3.70
  -6   4   7   96.05    3.73
  -8  -1   3   89.07    3.50
  -8   1   3   83.78    3.29
  -4  14   3   25.13    1.20
  -4  14   3   25.88    1.40
  -7   9   1   53.91    2.19
  -7   9   1   57.57    2.28
  -2   8   9  143.31    5.33
  -1  16  -3  417.52   13.80
   1  16   3  474.37   15.66
  -1  16  -3  405.86   13.60
  -5  -4  -8  318.67   10.40
  -5   4  -8  320.11   10.60
  -5   4  -8  352.43   12.36
  -3  11  -7  283.22    9.73
  -6  -3  -7    0.71    0.59
  -6   3  -7    0.29    0.59
  -6   3  -7    1.32    0.55
  -6  -7   6  101.10    4.04
  -3  15   3   39.62    1.53
  -3  15   3   41.44    1.81
  -5  11   5  771.26   24.70
  -5  11   5  775.56   24.78
  -7   9  -1   37.93    1.69
  -7   9  -1   37.63    1.70
  -5  12   4  107.82    3.94
  -5  12   4  113.21    4.16
  -5  -5   8  129.32    4.94
  -5   5   8  118.57    4.42
  -7   8   3    0.40    0.78
  -7  -8   3    0.31    0.77
  -7  -5   5   27.42    1.60
  -7   5   5   26.71    1.51
  -4  14  -3  265.73    9.01
  -4  14  -3  265.52    8.74
  -6  10   4    2.11    0.78
  -6 -10   4    1.86    0.87
  -2  12  -7   58.86    2.24
  -2  12  -7   53.06    1.95
  -3  15  -3   88.74    3.48
  -3  15  -3   84.07    3.00
   0   9  -9   -0.31    0.61
   0   9   9    0.27    0.65
  -1  11   8  922.23   26.43
  -8   2   3   91.57    3.54
  -8  -2   3   92.39    3.60
  -8   4   2  268.57   14.36
  -8  -4   2  275.53   14.88
  -3   0  10  136.43    7.50
   2   8   9  115.50    6.33
  -2   8  -9  113.86    6.17
  -2   8  -9  114.94    6.38
  -8   0  -3    1.17    0.74
  -4  10   7    0.14    0.74
  -8   5   0  182.08    9.82
   2   4  10  231.95   12.74
  -2   4 -10  241.98   12.76
  -5  -8   7   49.58    2.35
  -5   8   7   49.80    2.27
   0  14  -6    0.79    0.59
   0  14  -6    0.74    0.59
   0  14   6    0.74    0.57
  -7   7   4  143.96    7.84
  -7  -7   4  136.86    7.79
  -7   0   6  160.78    8.76
  -1  11  -8    0.83    0.70
   1  11   8    0.91    0.57
  -3  -1  10  255.68   13.57
  -3   1  10  251.56   13.45
  -8   1  -3   19.13    1.25
  -8  -1  -3   19.51    1.31
  -3   7   9  308.50   16.23
  -4   8   8    8.05    1.05
   0  15   5  307.13   16.08
   0  15  -5  285.81   15.20
   0  15  -5  295.84   15.60
  -7  -1   6  305.28   16.10
  -7   1   6  298.48   15.74
  -8   5   1  228.78   12.21
   0   6  10   43.06    1.95
   0   6 -10   36.99    2.04
  -5  12  -4  644.42   33.48
  -5  12  -4  657.26   34.41
  -6  -9   5   55.60    2.62
  -5  11  -5  244.99   13.00
  -5  11  -5  210.55   11.10
  -1   9   9  129.03    7.04
  -7   8  -3    1.92    0.75
   0  17   0    0.09    0.49
  -8   4  -2  615.56   32.15
  -8   4  -2  616.03   32.09
  -4   4  -9   40.62    1.67
   4   4   9   38.34    1.93
  -4   4  -9   31.84    1.50
  -6  11   3   10.98    1.02
  -6  10  -4    2.32    0.66
  -6  10  -4    2.19    0.65
  -8   5  -1   70.24    2.81
  -8   5  -1   73.37    2.82
  -7   9   2    6.76    0.97
  -7   9   2    7.10    0.99
  -6   7  -6   29.39    1.40
  -6   7  -6   26.68    1.78
  -5 -10   6  144.19    8.34
  -5  10   6  166.12    8.98
   1   9   9  265.31   14.05
  -1   9  -9  278.89   14.76
  -1   9  -9  274.91   14.90
  -3  -2  10   28.20    1.63
  -3   2  10   30.06    1.65
  -8  -2  -3   20.05    1.29
  -8   2  -3   18.34    1.26
  -8   2  -3   20.10    1.28
  -4  15   0    5.29    0.64
  -4  15   0    5.76    0.80
   1  14  -6    8.66    0.89
  -1  14   6    9.17    0.93
  -6   4  -7   92.30    3.26
  -6   4  -7   81.30    3.24
  -6  -4  -7   97.26    3.40
  -8  -3   3    9.22    1.08
  -8   3   3    8.98    1.03
  -6  12   0  356.49   18.65
  -6  12   0  329.36   17.23
  -7  -2   6  117.06    6.69
  -7   2   6  120.89    6.84
  -4   5   9   54.52    2.40
  -4  -5   9   55.96    2.66
  -7  -5  -5  194.49   10.31
  -7   5  -5  184.12    9.76
  -7   5  -5  120.96    8.77
   1  14   6   16.20    1.06
  -1  14  -6   15.24    1.00
  -1   6  10  121.95    6.76
   0  17  -1   75.92    2.82
   0  17  -1   80.93    3.03
   0  17   1   80.19    3.01
  -4  10  -7    6.49    0.78
  -4  10  -7    6.19    0.69
   1  15  -5  343.48   17.93
  -1  15   5  350.80   18.39
  -2   5  10  102.97    3.97
  -3   0 -10   57.65    2.19
  -6   5   7   74.76    3.00
  -6  -5   7   71.96    3.10
  -7   7  -4  138.67    7.52
  -7   7  -4  131.09    7.07
  -7  -7  -4  146.85    7.93
  -5   5  -8   20.69    1.12
  -5   5  -8   23.13    1.38
  -6  11  -3   74.37    2.83
  -6  11  -3   76.02    2.80
  -5  13   3   18.49    1.31
  -5  13   3   17.25    1.14
  -4  15   1  237.45   12.63
  -4  15   1  230.94   12.12
  -7   9  -2   35.43    1.65
  -7   9  -2   40.02    1.79
  -3   7  -9   44.39    1.80
  -3   7  -9   42.10    1.86
  -1  15  -5    7.90    0.77
   1  15   5    8.03    0.76
  -1  15  -5    6.94    0.81
   0  13  -7   23.83    1.31
   0  13   7   23.46    1.36
   3  16   0   13.95    0.96
  -3  16   0   12.79    0.85
  -3  16   0   14.19    1.06
  -3  -1 -10   13.45    0.88
  -3   1 -10   13.84    0.87
  -5   8  -7   50.02    2.17
  -5   8  -7   52.12    2.02
  -6  12   1   93.94    3.47
  -6  12   1   85.49    3.12
   1  17   0   24.72    1.34
  -1  17   0   24.21    1.26
  -1  17   0   27.85    1.45
  -4  15  -1   70.78    2.72
  -4  15  -1   67.39    2.49
  -1   6 -10   24.86    1.33
   1   6  10   23.92    1.45
  -4   8  -8   11.97    0.98
  -4   8  -8   11.44    0.86
  -6   9  -5    1.20    0.73
  -6  12  -1   26.87    1.45
  -6  12  -1   25.68    1.29
  -3  14   5   12.01    1.05
   2  16  -3   -0.18    0.55
  -2  16   3   -0.05    0.60
  -7   0  -6 1329.29   38.24
  -3  13   6    4.56    0.80
  -3  16   1   81.17    3.07
   3  16  -1   72.15    2.72
  -3  16   1   72.54    2.59
  -8   5   2   81.68    3.17
  -5  13  -3   83.04    2.97
  -5  13  -3   84.13    3.14
  -3   3  10   99.63    3.75
  -8   3  -3    0.65    0.72
  -8  -3  -3    0.17    0.75
  -8   3  -3   -0.11    0.58
   2   5  10  115.32    6.56
  -2   5 -10  122.48    6.59
   1  17  -1   25.91    1.27
  -1  17   1   25.37    1.38
   3  16   1    5.35    0.65
  -3  16  -1    5.51    0.63
  -3  16  -1    5.10    0.73
   2  16   3    0.58    0.45
  -2  16  -3   -0.35    0.64
  -2  16  -3    0.39    0.52
  -4  13   5  153.83    8.23
  -4  13   5  164.72    8.84
  -1  17  -1   94.74    3.45
  -1  17  -1   93.25    3.28
   1  17   1   91.91    3.28
  -5  10  -6   -0.05    0.65
  -3   2 -10    3.33    0.60
  -7   1  -6    5.46    0.72
  -7  -1  -6    6.35    0.78
  -5  -6   8  252.66   13.70
  -5   6   8  245.68   13.30
  -7   6   5   14.29    1.26
  -7  -6   5   13.84    1.24
  -3  10   8  119.14    6.62
  -1  13   7   35.41    1.68
   1  13  -7   36.17    1.67
   1  13  -7   34.52    1.59
  -7   3   6  512.58   27.14
  -7  -3   6  510.37   26.97
   0  16  -4   12.43    0.93
   0  16   4   12.06    0.96
   0  16  -4   11.33    0.94
  -3  14  -5  355.02   18.61
  -3  14  -5  356.24   18.62
  -2  11   8   89.38    3.39
  -1  13  -7   39.73    1.71
  -1  13  -7   43.37    1.88
  -8   6   0    3.55    0.82
  -8   6   0    2.99    0.75
  -8  -4   3    8.83    1.09
  -8   4   3    9.98    1.06
  -4  12   6   90.27    3.35
  -4  12   6   97.13    3.58
  -8   5  -2   56.79    2.34
  -8   5  -2   61.06    2.50
  -4   5  -9   20.80    1.13
  -4   5  -9   20.79    1.26
  -5  14   0    9.46    0.81
  -3  13  -6   71.58    2.87
  -3  13  -6   70.60    2.63
  -6  -8   6  252.99   13.49
  -7  -2  -6  125.10    6.72
  -7   2  -6  118.57    6.44
  -8   0   4   22.69    1.50
   0  17  -2  209.69   11.07
   0  17  -2  214.66   11.43
   0  17   2  230.69   12.21
  -8   6   1  186.02    9.97
  -8   6   1  177.47    9.59
  -4  13  -5  642.20   33.87
  -4  13  -5  625.37   32.46
  -6   5  -7  651.28   34.28
  -6   5  -7  600.09   31.99
  -4  15   2   57.09    2.18
  -4  15   2   60.44    2.43
  -8   1   4   17.90    1.42
  -8  -1   4   17.21    1.31
  -2   9   9  420.44   22.68
  -6  12   2    0.02    0.59
  -1  16   4   48.86    2.05
   1  16  -4   50.14    2.16
  -7  10   0    0.97    0.80
  -7  10   0    1.21    0.67
  -5  14   1  197.82   10.53
  -5  14   1  188.82    9.99
  -4  14   4    1.88    0.77
  -4  14   4    1.17    0.51
  -2  11  -8  220.15   11.67
  -3  10  -8  221.55   11.96
  -3  10  -8  226.60   12.02
  -8   6  -1   15.36    1.10
  -3   3 -10  177.67    9.41
   3   3  10  172.09    9.61
   1  16   4  104.55    3.75
  -1  16  -4   96.55    3.52
  -1  16  -4   99.11    3.51
  -3  15   4   96.93    3.60
  -5  14  -1  456.05   23.71
  -4  15  -2  195.53   10.29
   0   7  10   20.69    1.40
   0   7 -10   22.21    1.28
  -7   9   3  103.35    3.84
  -7   9   3  108.90    4.03
  -7  -8   4   14.33    1.29
  -7   8   4   13.95    1.24
  -7  10   1  116.67    6.43
  -7  10   1  113.27    3.79
  -2  14   6  359.66   18.82
  -6  12  -2  626.00   32.46
  -6  12  -2  586.93   30.42
  -3  16   2  848.61   23.93
  -3  16   2  778.81   40.26
  -3   4  10  205.32   11.08
  -8  -4  -3   16.78    1.25
  -8   4  -3   16.59    1.18
  -8   4  -3   10.42    1.02
  -5   0   9   -0.25    0.94
  -4  12  -6   34.42    1.52
  -4  12  -6   36.03    1.65
  -4   6   9  195.00   10.44
  -4  -6   9  192.13   11.04
  -7   6  -5  106.49    3.85
  -7  -6  -5  109.87    3.89
  -7   6  -5  104.05    3.70
  -3  12   7  446.37   23.28
  -3   8   9    5.38    0.87
  -2   6  10   36.80    1.85
  -6  -6   7   79.54    3.28
  -8  -2   4  165.59    9.00
  -8   2   4  164.72    8.88
   1  17  -2   83.06    3.06
  -1  17   2   81.27    3.00
  -7   4   6   69.18    2.86
  -7  -4   6   68.58    3.07
  -4  14  -4  261.16   13.68
  -4  14  -4  314.95   16.56
  -3  15  -4    7.61    0.74
  -5   6  -8   42.31    1.72
  -5   6  -8   46.43    1.96
  -7  10  -1  158.71    8.50
  -7  10  -1  168.90    9.07
  -2   9  -9    0.14    0.59
  -2   9  -9    0.08    0.58
   1  17   2  109.11    3.85
  -1  17  -2  112.60    3.73
  -1  17  -2  112.32    3.64
  -5  -1   9  109.99    4.16
  -3  16  -2   32.87    1.44
  -3  16  -2   34.93    1.67
   2  15  -5   15.11    1.05
  -2  15   5   16.10    1.18
  -5   9   7  114.75    6.32
  -5  -9   7  111.86    4.33
  -7   3  -6  137.41    7.36
  -7  -3  -6  123.46    6.64
  -6   0   8  187.87   10.27
  -2  14  -6    0.75    0.70
  -2  14  -6    0.28    0.55
   0  10   9    8.12    0.91
   0  10  -9    9.44    0.91
  -1   7  10   98.63    3.73
  -8   0  -4  184.21   11.03
  -4   9   8    1.53    0.95
  -6   1   8   58.54    2.61
  -6  -1   8   57.95    2.59
  -6   8  -6  225.30   12.21
  -6   8  -6  304.73   15.94
   0   0  11    0.31    0.72
  -2  15  -5   57.06    2.16
  -2  17   0    5.64    0.79
   2  17   0    6.05    0.70
  -2  17   0    6.01    0.62
   0  12  -8   35.91    1.62
   0  12   8   33.40    1.60
   0  12  -8   31.87    1.51
  -8   1  -4  110.23    3.87
  -8  -1  -4  112.66    3.70
  -7   9  -3   14.09    1.03
  -7   9  -3   15.56    1.12
  -8   6   2   22.69    1.44
  -6  11   4   23.54    1.43
  -6 -11   4   24.49    1.63
   0   1  11  230.72   12.28
  -1   7 -10    2.55    0.69
   1   7  10    2.94    0.80
  -3  12  -7  220.89   11.65
  -3  12  -7  219.53   11.89
  -5  -2   9    1.92    1.04
   2   6  10   27.55    1.50
  -2   6 -10   29.38    1.37
  -5  12   5   29.83    1.61
  -5  12   5   31.87    1.57
  -8   5   3   89.45    3.42
  -8  -5   3   93.28    3.65
  -7   8  -4    2.31    0.71
  -5  14   2   71.65    2.68
  -5  14   2   74.40    2.90
  -6 -10   5   50.01    2.31
  -4  11   7  169.55    9.12
  -3   8  -9   60.94    2.30
  -3   8  -9   63.54    2.46
  -1  10   9  153.06    8.29
  -2  17   1  301.38   15.78
   2  17  -1  342.14   17.95
  -2  17   1  332.46   17.40
  -2  13   7    8.98    0.97
  -3   4 -10  253.78   13.39
   3   4  10  248.30   13.43
  -8  -3   4  110.60    4.22
  -8   3   4  111.71    3.90
  -2  17  -1    0.10    0.41
  -2  17  -1   -0.16    0.71
   2  17   1    0.04    0.46
  -6  -2   8  246.55   13.23
  -6   2   8  263.49   14.02
  -1   0  11   -0.55    0.72
  -8  -2  -4   18.17    1.24
  -8   2  -4   18.73    1.19
  -1  12   8    6.36    0.81
  -5   7   8  186.67   10.02
  -5  -7   8  189.94   10.21
  -7  10   2  328.67   17.21
  -7  10   2  313.66   16.48
  -8   6  -2  272.88   14.37
  -8   6  -2  290.03   15.26
  -4   6  -9   70.57    2.62
  -4   6  -9   74.09    2.80
  -7  -7   5  437.60   23.23
  -7   7   5  437.63   23.37
  -5  14  -2   81.20    3.05
  -5  14  -2   78.00    2.85
  -1  10  -9   81.63    3.09
   1  10   9   81.16    3.15
  -1  10  -9   85.13    3.03
   0   2  11    0.21    0.81
  -1   1  11   26.15    1.49
  -1  -1  11   25.04    1.57
  -5  13   4    5.72    0.71
  -5  13   4    5.29    0.94
  -5   9  -7   47.52    1.90
  -5   9  -7   48.75    2.03
  -2  13  -7   18.56    1.07
  -2  13  -7   19.72    1.24
  -1  12  -8  365.44   19.05
  -1  12  -8  297.46   16.46
  -1   0 -11    0.07    0.59
  -8   7   0   40.33    1.87
  -8   7   0   37.85    1.83
  -6   6  -7  138.15    7.58
  -6   6  -7  160.81    8.54
  -5   0  -9    0.03    0.50
  -6  11  -4    0.47    0.72
  -6  11  -4    0.14    0.59
  -4   9  -8   23.61    1.41
  -4   9  -8   21.88    1.17
  -7   4  -6   69.70    4.03
  -7  -4  -6   74.32    2.80
  -7   4  -6   71.41    2.65
  -5 -11   6   54.88    2.93
  -5  11   6   60.28    2.98
  -3  -5  10  209.43   11.01
  -3   5  10  204.34   10.73
  -8   5  -3  148.98    8.97
  -8  -5  -3  188.42    9.84
  -8   5  -3  179.11    9.29
  -5   3   9   65.89    3.28
  -5  -3   9   69.08    3.41
  -1   1 -11    8.34    0.79
   1   1  11    7.73    1.02
  -1  -1 -11    5.73    0.86
  -5  12  -5  220.14   11.90
  -5  12  -5  200.09   10.30
  -7  10  -2  438.14   22.35
  -7  10  -2  482.00   19.10
  -5  -1  -9    0.92    0.46
  -5   1  -9    1.26    0.51
   0  17  -3  215.47   11.09
   0  17   3  221.26   11.38
   0  17  -3  227.75   11.83
  -4  15   3    2.48    0.54
  -4  15   3    3.23    0.79
   2  16  -4   52.93    2.56
  -2  16   4   56.67    2.75
  -6  12   3   55.94    2.75
  -7  -5   6    2.81    0.85
  -7   5   6    3.00    1.02
  -8   7   1   76.37    4.27
  -8   7   1   79.46    4.39
  -1   2  11    1.50    0.84
  -1  -2  11    1.33    0.82
  -4  11  -7   17.55    1.20
  -6  10  -5    1.73    0.65
  -6   0  -8    0.30    0.50
  -6  -3   8  119.61    6.47
  -6   3   8  128.66    7.05
  -5  13  -4  255.28   13.06
  -5  13  -4  269.98   13.86
  -2  16  -4   39.46    2.01
  -2  16  -4   38.23    1.88
  -8   7  -1   23.73    1.54
  -8   7  -1   24.74    1.51
  -8   3  -4    8.33    0.85
  -8  -3  -4    7.42    0.85
  -6   1  -8   -0.49    0.51
  -6  -1  -8    0.07    0.43
  -4   0  10  779.96   30.70
  -4  15  -3   10.00    0.76
   0   3 -11  223.00   11.94
   0   3  11  229.58   12.22
  -1   2 -11   74.44    3.49
   1   2  11   71.61    3.63
  -5  -2  -9   76.74    4.10
  -5   2  -9   75.25    3.26
  -3  16   3  286.86   14.72
  -8  -4   4  232.55   12.42
  -8   4   4  237.93   12.47
  -4   1  10   15.85    1.36
   2  17  -2   14.37    0.98
  -2  17   2   14.37    1.04
  -6  12  -3  140.29    7.37
  -6  12  -3  137.81    7.23
  -4   7   9   82.19    4.57
  -4  -7   9   82.87    4.79
  -7   7  -5   11.10    0.91
  -7   7  -5    9.78    0.95
   1  17  -3   40.16    2.04
  -1  17   3   40.04    2.07
  -6  -9   6   -0.18    0.78
  -6   9   6    0.59    0.80
  -2  17  -2    4.66    0.75
  -2  17  -2    4.73    0.61
   2  17   2    4.43    0.61
  -2   7  10   56.11    2.81
   0  15  -6    1.52    0.62
   0  15   6    1.14    0.57
   0  15  -6    0.96    0.61
  -6  -7   7   14.77    1.21
  -6  13   0    8.70    0.82
  -6  13   0    9.97    1.01
  -1  17  -3    6.93    0.71
   1  17   3    7.38    0.75
  -1  17  -3    6.84    0.80
  -5   7  -8   10.46    0.94
  -5   7  -8    9.54    0.78
  -3  16  -3   30.70    1.62
  -3  16  -3   31.42    1.80
   0   8 -10  140.86    7.52
   0   8  10  137.26    7.29
  -5  11  -6  111.04    6.32
  -5  11  -6  103.55    5.66
  -3   5 -10  202.02   10.41
  -3   5 -10  193.76   10.08
  -6   2  -8    1.19    0.52
  -6  -2  -8    0.76    0.55
  -3  11   8   49.79    2.57
  -1   3  11   21.14    1.48
  -8  -6   3   -0.36    0.72
  -8   6   3    0.05    0.84
  -4   2  10    4.31    1.01
  -6  13   1   79.59    4.39
  -6  13   1   72.64    3.35
  -5  -4   9   66.44    3.36
  -5   4   9   67.32    3.34
  -7  -9   4    3.30    0.93
  -7   9   4    2.98    0.87
  -2  10   9    0.77    0.78
  -8   7   2   67.82    3.28
  -8   7   2   71.66    3.39
   0  16  -5    0.49    0.65
   0  16  -5    0.44    0.62
   0  16   5    0.29    0.59
  -6  13  -1    6.47    0.77
  -6  13  -1    5.69    0.87
  -7   0   7   -0.22    0.82
   1  15  -6   37.91    2.00
  -1  15   6   40.10    2.08
  -1   3 -11  242.48   18.94
   1   3  11  279.09   14.85
  -5  14   3   57.30    2.70
  -5  14   3   59.10    2.91
  -1   8  10   17.25    1.30
  -2   7 -10  372.87   19.00
  -2   7 -10  347.24   17.78
  -2   0  11   -0.22    0.88
  -5   3  -9    7.33    0.68
   0  14  -7   12.75    0.97
   0  14  -7   13.28    0.91
   0  14   7   14.51    1.00
  -3   9   9   17.18    1.32
  -7   5  -6   48.26    3.12
  -7  -5  -6   50.32    2.46
  -7   5  -6   43.74    2.14
  -6  -4   8   97.90    5.44
  -7  -1   7    4.65    1.09
  -7   1   7    4.92    1.03
  -2  12   8    5.44    0.81
  -1  15  -6  122.79    6.46
  -1  15  -6  111.39    5.95
  -2  -1  11  205.35   11.26
  -2   1  11  213.21   11.07
  -8  -4  -4  150.02    7.88
  -8   4  -4  150.93    8.16
  -8   4  -4  153.50    8.01
  -8   0   5    0.16    0.80
  -7  10   3  346.66   17.93
  -7  10   3  314.10   16.10
  -7  11   0   28.66    1.65
  -7  11   0   29.90    1.75
   0   4 -11    9.07    0.82
   0   4  11   11.18    1.04
   1   8  10    0.25    0.60
  -1   8 -10    1.38    0.62
  -4   0 -10  113.62    6.04
  -4  16   0   16.47    1.22
  -4  16   0   13.74    0.82
  -3  11  -8    8.86    0.85
  -8  -1   5   61.73    3.15
  -8   1   5   61.09    3.11
  -6  -3  -8  237.64   12.71
  -6   3  -8  252.28   12.96
  -3  14   6   10.94    1.06
  -8   7  -2    7.25    0.81
  -4   7  -9  128.18    6.68
  -4   7  -9  132.55    7.06
  -6   9  -6  212.68   11.02
  -6   9  -6  212.11   10.88
  -5  14  -3   20.80    1.24
  -5  14  -3   21.64    1.39
  -3   6  10  104.23    5.65
  -4  -1 -10   45.17    2.17
  -4   1 -10   40.07    1.97
  -2  10  -9  348.32   17.91
  -2  10  -9  359.01   18.27
  -8  -6  -3   68.25    3.47
  -8   6  -3   61.62    2.97
  -8   6  -3   66.56    3.11
  -5  10   7   45.73    2.45
  -5 -10   7   44.75    2.59
  -4  14   5    5.87    0.88
   1  16  -5    9.58    0.86
  -1  16   5   11.26    0.95
  -4  13   6   17.32    1.39
  -4  -3  10    9.59    1.19
  -4   3  10    9.50    1.07
  -7  11   1  308.42   15.77
  -7  11   1  312.59   16.07
   1  14  -7   32.61    1.77
  -1  14   7   32.84    1.80
  -7  -6   6   30.81    1.95
  -7   6   6   33.34    1.96
  -2  12  -8   41.93    2.15
  -7   2   7    0.67    0.91
  -7  -2   7   -0.08    0.88
  -3  15   5   37.43    2.03
  -4  16   1    9.10    0.92
  -4  16   1    9.32    0.69
  -6   7  -7   13.50    1.02
  -6   7  -7   16.70    1.15
  -2  -2  11   48.63    2.55
  -2   2  11   50.29    2.62
  -1  16  -5    4.92    0.80
  -1  16  -5    4.32    0.69
  -2   0 -11   -0.24    0.53
  -8   5   4    5.21    0.93
  -8  -5   4    4.45    0.93
  -4  10   8  243.89   12.64
  -5  -8   8  112.48    6.26
  -5   8   8  108.90    5.97
   0  18   0   66.83    3.14
  -7   8   5   19.67    1.41
  -7  -8   5   16.96    1.41
  -7   9  -4  198.02   10.24
  -4  16  -1    0.18    0.50
  -4  16  -1   -0.15    0.64
  -7  11  -1  485.37   19.20
  -7  11  -1  464.11   23.66
  -1  14  -7   70.28    3.21
  -1   4  11   13.70    1.12
  -3   9  -9   50.31    2.35
  -3   9  -9   47.93    2.39
  -2  -1 -11  231.19   22.53
  -2   1 -11  283.93   18.59
  -7  10  -3   82.57    4.48
  -7  10  -3   87.52    4.72
  -8   2   5   19.06    1.47
  -8  -2   5   18.47    1.43
  -6  13   2   60.96    2.90
  -3  14  -6   16.04    1.17
  -3  14  -6   14.98    0.93
  -4   2 -10  119.39    6.25
   0  11  -9   54.12    2.64
   0  11   9   54.84    2.72
  -8   8   0   30.04    1.75
  -8   8   0   28.75    1.72
  -3  17   0   18.93    1.11
   3  17   0   18.28    1.16
  -3  17   0   18.17    1.26
  -3  15  -5   97.24    5.17
  -4  14  -5    0.59    0.51
  -4  14  -5    0.03    0.65
  -1   4 -11   68.34    6.70
   1   4  11   94.03    5.26
   0  18   1  240.27   12.39
   0  18  -1  236.59   12.23
  -5   4  -9    4.48    0.68
  -5   4  -9    5.44    0.62
  -5  15   0   16.32    1.08
  -5  15   0   15.58    1.19
  -8   8   1   59.96    2.93
  -8   8   1   51.52    2.59
  -6  13  -2   35.59    1.93
  -6  13  -2   34.88    1.81
  -5   5   9   29.18    1.79
  -5  -5   9   29.87    1.91
  -4  13  -6  134.37    7.06
  -4  13  -6  128.38    6.71
  -3  13   7  192.04    9.98
  -2  17   3   75.65    3.40
   2  17  -3   73.79    3.45
  -2   2 -11  237.25   12.46
   2   2  11  234.12   12.74
  -3   6 -10   21.60    1.35
  -3   6 -10   21.87    1.26
  -3  17   1   25.00    1.55
   3  17  -1   25.37    1.44
  -3  17   1   23.77    1.31
   1  18   0    6.48    0.73
  -1  18   0    6.63    0.85
  -8   0  -5    0.09    0.68
  -7   0  -7    0.26    0.56
  -7  -3   7   35.60    2.09
  -7   3   7   33.04    2.00
  -6  11   5    0.59    0.84
  -6 -11   5   -0.03    0.88
  -6  11   5    0.41    0.73
  -3  17  -1   26.32    1.41
  -3  17  -1   24.36    1.49
  -2  17  -3   58.27    2.71
  -2  17  -3   59.91    2.82
  -2   3  11   34.51    2.02
  -2  -3  11   34.30    2.09
  -1  11   9  220.74   11.44
  -8   8  -1  274.38   14.07
  -8   8  -1  282.95   14.58
  -6   4  -8   13.10    0.87
  -5  10  -7   -0.42    0.57
  -5  10  -7    0.13    0.65
  -6  -5   8    0.05    0.83
  -8   1  -5  130.23    6.82
  -8  -1  -5  136.98    7.19
  -5  15   1    1.06    0.54
  -5  15   1    1.44    0.78
  -6  12   4  478.41   24.32
  -6  12   4  480.02   19.05
  -4  15   4  474.55   24.13
  -7  -1  -7    2.18    0.62
  -7   1  -7    2.83    0.66
   0  17   4  132.21    6.94
   0  17  -4  129.54    6.84
   0  17  -4  130.96    6.89
  -8  -5  -4   15.28    1.20
  -8   5  -4   14.45    1.06
  -8   5  -4   11.48    1.19
  -4  10  -8   43.54    2.13
  -4  10  -8   40.97    2.10
  -8   3   5   78.71    4.45
  -8  -3   5   71.67    3.49
  -7  11   2   72.81    3.42
  -7  11   2   91.85    5.03
  -4  -4  10    6.68    1.08
  -4   4  10    6.05    1.01
  -5  15  -1    2.88    0.58
  -1  11  -9    1.66    0.66
  -1  11  -9    1.77    0.70
   0   5 -11   17.72    1.17
   0   5  11   20.67    1.43
  -4   3 -10    4.35    0.61
  -4  12   7   46.18    2.41
  -4  -8   9    8.70    1.15
  -4   8   9   10.01    1.10
  -7   8  -5   24.94    1.44
  -7   8  -5   20.32    1.44
   0  13  -8   39.63    2.10
   0  13   8   40.75    2.09
   1  18  -1    1.82    0.63
  -1  18   1    1.25    0.68
   1  18   1   81.87    4.42
  -1  18  -1   82.51    4.45
  -1  18  -1   75.32    3.38
  -4  16   2   86.59    4.60
  -4  16   2   92.49    5.02
  -2   8  10  256.96   13.44
  -6  -8   7  112.33    6.34
  -6   8   7  111.04    6.01
  -7   6  -6   52.18    2.76
  -7   6  -6   46.16    2.27
  -8   7   3   19.61    1.34
  -2  15   6    3.65    0.79
  -5   8  -8  245.13   12.65
  -5   8  -8  226.10   11.73
  -3  13  -7  158.87    8.23
  -3  13  -7  168.94    8.88
  -9   1   0    0.31    0.74
  -5  13   5  149.30    7.83
  -5  13   5  150.82    7.97
  -3  16   4   12.27    0.94
  -4  16  -2   36.23    1.81
  -4  16  -2   37.22    1.99
  -8   2  -5    1.87    0.66
  -8  -2  -5    0.85    0.73
  -4  15  -4   16.36    1.06
  -4  15  -4   21.30    1.43
  -7  -2  -7    0.17    0.56
  -7   2  -7    0.12    0.56
  -7  11  -2  125.40    6.64
  -7  11  -2  133.21    7.00
  -9   0   1    0.10    0.62
  -2   3 -11    7.19    0.73
   2   3  11    6.16    0.89
  -1  17   4   86.90    4.71
   1  17  -4   86.06    4.65
  -2  15  -6  152.42    7.91
   0   9 -10    1.15    0.65
   0   9  10    0.96    0.65
  -1   5  11    7.90    0.93
  -9  -1   1   17.85    1.33
  -9   1   1   18.07    1.36
  -6  12  -4   26.00    1.47
  -6  12  -4   26.12    1.53
  -1  17  -4   45.65    2.25
  -1  17  -4   43.78    2.20
  -1  13   8   17.28    1.21
  -6  11  -5  206.09   10.64
  -6  11  -5  233.05   11.99
  -8   8   2   96.20    5.26
  -8   8   2  101.69    5.56
   0  18  -2   91.12    5.04
   0  18   2  111.74    5.97
   0  18  -2   96.70    5.23
  -5  12   6   57.38    2.86
  -5  12   6   59.97    2.93
  -3  16  -4    0.88    0.49
  -3  16  -4   -0.04    0.59
  -9   0  -1   -0.53    0.71
  -2   8 -10    5.41    0.77
  -2   8 -10    5.33    0.71
  -2  16   5   10.45    0.98
   2  16  -5    9.34    0.89
  -6  10   6    9.45    0.88
  -6 -10   6    8.81    1.16
  -2  14   7    5.51    0.78
  -8   6   4  230.94   12.94
  -8  -6   4  256.45   14.52
  -9   2   0    7.45    0.91
  -9   1  -1   14.29    1.16
  -1  13  -8   21.24    1.27
  -1  13  -8   20.99    1.22
  -3  17   2   80.57    4.73
  -7   4   7   55.62    2.64
  -7  -4   7   50.72    2.46
  -3   7  10   50.15    2.47
  -8   7  -3  147.07    7.73
  -8  -7  -3  149.53    7.97
  -8   7  -3  140.89    7.40
  -1   5 -11   51.88    2.52
   1   5  11   51.83    2.65
  -4  12  -7    1.13    0.58
  -4  12  -7    0.53    0.67
  -2   4  11   17.26    1.25
  -2  -4  11   15.69    1.29
  -5   5  -9    8.99    0.92
  -5   5  -9    8.74    0.76
  -7   7   6   -0.50    0.90
  -7  -7   6    0.28    0.72
  -5  15   2   41.60    2.04
  -5  15   2   36.26    1.71
  -2  16  -5  274.88   15.19
  -2  16  -5  298.32   16.53
  -3  17  -2   13.37    1.06
  -3  17  -2   12.65    0.88
  -1   9  10   86.54    5.11
  -5  13  -5   16.40    1.01
  -5  13  -5   16.95    1.21
  -9   2   1   38.39    2.00
  -5  14   4   22.67    1.29
  -5  14   4   25.94    1.56
  -8   4   5    4.74    0.91
  -8  -4   5    5.00    0.91
  -8   8  -2  122.40    6.97
  -8   8  -2  122.20    6.96
  -4   8  -9    1.44    0.66
  -4   8  -9    1.88    0.65
  -6  13   3   52.66    2.36
  -6  13   3   53.06    2.47
  -8   3  -5    3.63    0.70
  -8  -3  -5    3.53    0.68
  -2  14  -7    7.05    0.74
  -2  14  -7    7.11    0.84
  -7  -3  -7   46.55    2.07
  -7   3  -7   41.72    1.90
  -4   4 -10   37.71    1.70
  -4   4 -10   38.76    1.88
  -6   5  -8    2.17    0.53
  -6   5  -8    1.97    0.75
  -7  10   4   86.81    5.13
  -7  10   4   93.67    5.50
   1  18  -2   30.71    1.57
  -1  18   2   31.00    1.60
  -5  15  -2    7.49    0.89
  -5  15  -2    9.34    0.82
  -9   2  -1  167.17    9.47
  -9   2  -1  160.57    9.12
  -1   9 -10    2.93    0.71
  -1  18  -2   36.86    1.72
  -1  18  -2   35.46    1.78
   1  18   2   37.25    1.75
  -5  -6   9    1.44    1.05
  -5   6   9   -0.53    0.88
  -6   8  -7  152.84    8.72
  -6   8  -7  179.66   10.04
  -3  10   9  162.72    9.20
  -4  -5  10  124.45    7.37
  -4   5  10  122.07    7.04
  -3   0  11    0.28    0.77
  -9   0   2   27.41    1.65
  -2   4 -11   51.53    2.39
   2   4  11   54.01    2.65
  -5  12  -6   80.55    4.71
  -5  12  -6   86.71    4.95
  -9   3   0   25.87    1.63
  -9   3   0   24.82    1.42
  -3   1  11   49.54    2.48
  -3  -1  11   47.38    2.45
  -3  12   8   18.77    1.32
  -2  11   9    3.76    0.81
  -6  -6   8  114.96    6.68
  -5  14  -4   46.28    2.16
  -5  14  -4   46.24    2.04
  -9  -1   2   17.08    1.26
  -9   1   2   16.54    1.28
   2  18   0  110.10    6.27
  -2  18   0  101.98    5.86
  -6  13  -3    3.98    0.64
  -6  13  -3    3.82    0.79
  -8   6  -4    7.48    0.90
  -8   6  -4    6.31    0.80
  -8  -6  -4    9.38    0.98
  -3   7 -10    2.33    0.62
  -3   7 -10    2.31    0.70
  -5  -9   8  196.36   11.33
  -5   9   8  207.80   11.64
  -7  -9   5    5.51    0.97
  -7   9   5    5.49    1.02
  -6  10  -6   18.36    1.23
   0   6  11    1.21    0.76
   0   6 -11    1.99    0.65
  -9   3   1   15.74    1.17
  -7  11   3  536.49   29.39
  -7  11   3  580.41   32.04
  -8   9   0   14.10    1.09
  -8   9   0   12.91    1.06
  -9   0  -2   -0.44    0.81
  -2  18   1    5.12    0.79
   2  18  -1    5.08    0.69
  -4  16   3   14.84    1.12
  -3   2  11   36.99    1.95
  -3  -2  11   38.70    2.14
  -2  18  -1   80.38    4.62
   2  18   1   85.31    4.94
  -2  18  -1   94.82    5.49
  -6  14   0    7.28    0.96
  -6  14   0    7.03    0.83
  -7  10  -4   62.97    1.58
  -7  10  -4   59.01    2.83
  -9   3  -1  268.46   14.91
  -9   3  -1  278.70   15.53
  -9   2   2   -0.29    0.72
  -9  -2   2    0.06    0.83
  -2  11  -9  161.65    9.18
  -2  11  -9  177.89    9.89
  -5 -11   7   19.95    1.43
  -5  11   7   22.47    1.48
  -3  10  -9  123.94    6.94
  -3  10  -9  111.09    6.36
  -9  -1  -2   20.98    1.39
  -9   1  -2   21.88    1.42
  -7   7  -6   15.97    1.05
  -7   7  -6   18.01    1.29
  -7  12   0  221.30   12.29
  -7  12   0  283.47   15.76
  -8   4  -5   11.25    0.96
  -8  -4  -5   12.61    1.04
  -8   9   1  348.34   19.21
  -8   9   1  376.38   20.82
  -7   4  -7    0.68    0.60
  -7  -5   7   38.30    2.06
  -7   5   7   39.43    2.10
  -1   6  11   40.03    2.05
  -3  12  -8    0.52    0.67
  -2   5  11    7.13    0.93
  -4  11   8    0.83    0.83
   2  17  -4  183.16   10.44
  -2  17   4  186.92   10.44
  -6  14   1    1.49    0.59
  -3   0 -11    0.28    0.44
  -4  16  -3   29.09    1.41
  -2  13   8  117.80    6.74
  -8   9  -1  211.09   11.76
  -8   9  -1  193.33   11.05
  -7  11  -3    9.66    0.99
  -7  11  -3   11.37    0.95
  -8  -5   5    7.56    1.10
  -8   5   5    9.89    1.12
  -8   8   3  118.30    6.83
  -8   8   3  124.99    7.20
  -7  12   1    0.18    0.81
  -7  12   1    0.16    0.64
  -3   1 -11   23.64    1.23
  -6  14  -1    4.71    0.96
  -6  14  -1    4.34    0.69
  -4   5 -10   33.32    1.69
  -4   5 -10   31.14    1.50
   1   6  11  181.54   10.34
  -1   6 -11  129.45    7.43
  -2  17  -4    1.81    0.67
  -2  17  -4    1.80    0.56
  -6   0   9   -0.27    0.98
  -5   6  -9   20.97    1.47
  -5   6  -9   22.25    1.19
  -9  -2  -2   15.99    1.23
  -9   2  -2   15.95    1.25
   0  18  -3   52.06    2.28
   0  18   3   51.96    2.31
   0  18  -3   51.52    2.38
   0  16  -6   56.13    2.49
   0  16  -6   53.18    2.34
  -9   4   0   56.30    2.60
  -9   4   0   61.14    1.78
  -7  12  -1  142.44    8.02
  -7  12  -1  144.16    8.18
  -4   9   9   77.95    4.64
  -7   9  -5    0.52    0.65
  -6  -1   9   23.56    1.58
  -6   1   9   22.90    1.62
  -3  17   3  192.57   10.76
  -2   9  10   57.12    2.59
  -6  -9   7    7.52    1.11
  -6   9   7    7.15    1.04
  -8   0   6   59.56    2.77
  -8   7   4    3.20    0.90
  -3  -3  11    0.12    0.80
  -3   3  11    0.30    0.76
  -5   9  -8    9.30    0.97
  -5   9  -8   10.51    0.80
  -2  13  -8   22.92    1.24
  -2  13  -8   23.47    1.36
  -9   3   2  118.82    6.86
   0  12  -9   54.15    2.39
  -5  15   3  259.00   14.53
  -5  15   3  252.87   13.95
  -9   4   1   10.95    0.95
   0  15  -7    0.34    0.63
   0  15  -7    0.63    0.66
  -2   5 -11    3.91    0.66
  -8   1   6   97.93    5.83
  -8  -1   6   98.60    5.83
  -6   6  -8    6.75    0.75
  -6   6  -8    6.13    0.86
  -3   2 -11   43.56    1.94
  -3  17  -3    9.55    0.74
  -3  17  -3   10.21    0.85
  -5  11  -7   54.28    2.60
  -4  14   6  235.20   13.10
  -4   6  10    1.44    0.81
  -4  -6  10    1.92    1.04
   2  18  -2    2.16    0.58
  -2  18   2    2.94    0.73
  -9   4  -1    2.78    0.98
  -9   4  -1    2.65    0.75
  -3   8  10   73.69    4.40
  -8   8  -3    0.80    0.73
   1  16  -6  272.56   15.15
  -1  16   6  290.20   16.03
  -6  -2   9   -0.60    0.91
  -6   2   9   -0.39    0.97
   1  18  -3    3.65    0.74
  -1  18   3    3.13    0.65
  -4  11  -8    0.48    0.64
  -4  11  -8   -0.27    0.58
  -2  18  -2   -0.10    0.63
  -2  18  -2   -0.17    0.46
  -5  -1  10  190.23   10.71
  -3  15   6  524.31   28.71
  -1  18  -3   90.54    5.20
  -1  18  -3   96.80    5.53
  -8   9   2   93.21    5.43
  -8   9   2   95.84    5.58
  -9   0   3    0.14    0.72
  -7   8   6    8.65    1.10
  -7  -8   6    7.05    1.07
  -5  15  -3    0.51    0.69
  -5  15  -3    0.87    0.53
  -5  -7   9    0.94    0.94
  -5   7   9    0.76    0.85
  -6 -12   5  301.67   17.38
  -6  12   5  323.23   17.85
  -6  12   5  324.32   17.95
  -1  16  -6    9.65    0.94
  -1  16  -6    7.97    0.81
  -2   9 -10   66.15    1.68
  -2   9 -10   73.75    4.23
  -4  15   5    1.04    0.76
  -1  12   9   76.70    4.52
  -9  -3  -2   29.72    1.72
  -9   3  -2   31.38    1.72
  -9   3  -2   32.95    1.73
  -8  -2   6   18.95    1.42
  -8   2   6   19.28    1.45
  -6  14   2  117.35    6.65
  -6  14   2  112.69    6.52
   1  15  -7    0.36    0.63
  -1  15   7    0.89    0.60
   0  17  -5   84.58    4.90
   0  17  -5   88.03    5.11
  -9  -1   3   16.09    1.27
  -9   1   3   14.28    1.24
   0  10 -10  253.26   14.23
   0  10  10  241.27   13.41
  -7  12   2   25.55    1.59
  -7  12   2   23.42    1.40
  -6  -7   8  640.97    9.03
  -6   7   8  630.53   34.80
  -8  -5  -5  423.98   23.92
  -8   5  -5  361.96   23.86
  -8   5  -5  406.15   22.28
  -1  12  -9  189.71   10.58
  -7   5  -7  227.59   12.61
  -1  15  -7   55.49    2.40
  -8   7  -4   10.63    1.03
  -8   7  -4   12.91    1.05
  -5   2  10   33.09    1.91
  -5  -2  10   34.98    2.07
  -8   9  -2   41.63    1.99
  -8   9  -2   40.25    1.93
  -4   9  -9  132.66    7.49
  -4   9  -9  129.30    7.31
  -3   3 -11   22.22    1.21
  -6  13   4   15.61    1.24
  -6  13   4   14.58    1.04
  -3  15  -6   99.34    5.67
  -3  15  -6  100.92    5.83
  -6  14  -2   70.85    4.13
  -6  14  -2   76.62    4.50
   0   7 -11   10.61    1.16
   0   7  11   14.85    1.22
  -4  17   0    0.97    0.48
  -4  17   0    2.02    0.75
  -4  14  -6    0.27    0.69
  -4  14  -6    0.69    0.58
  -3  16   5   96.54    5.58
  -3  14   7    4.25    0.90
  -3   4  11   48.75    2.35
  -9  -2   3    1.67    0.89
  -9   2   3    2.25    0.87
  -4  15  -5   28.86    1.54
  -4  15  -5   27.41    1.37
  -7  -6   7   44.99    2.34
  -7   6   7   51.32    2.49
  -9   4   2   79.66    4.71
  -4  13   7   -0.53    0.81
  -1  10  10    8.98    0.97
  -6  -3   9  147.08    8.45
  -6   9  -7  327.33   18.46
  -6   9  -7  335.15   18.48
  -7  12  -2  132.68    7.48
  -7  12  -2  138.10    7.82
  -6  11   6   -0.26    0.79
  -6 -11   6    0.02    0.88
  -2   6  11    4.55    0.92
  -1  17   5   47.95    2.18
   1  17  -5   45.07    2.07
  -3   8 -10  282.03   15.54
  -3   8 -10  265.81   15.07
  -9   5   0  104.48    6.05
  -9   0  -3   -0.50    0.77
  -6   0  -9    0.39    0.51
  -7   0   8   10.06    1.22
  -4  17   1    1.43    0.76
  -4  17   1    0.56    0.46
  -1  17  -5   74.38    4.34
  -1  17  -5   74.35    4.35
  -8   0  -6    1.29    0.60
  -8  -6   5  104.07    6.25
  -8   6   5  100.53    5.87
  -8   3   6    6.66    1.03
  -8  -3   6    7.81    1.10
  -6  12  -5    5.41    0.70
  -6  12  -5    4.82    0.83
  -9   1  -3   27.81    1.55
  -9  -1  -3   26.00    1.53
  -3  16  -5  202.18   11.21
  -4  17  -1    7.60    0.69
  -4  17  -1    5.35    0.88
  -1  10 -10  243.67   16.48
  -4   6 -10   73.60    4.25
  -4   6 -10   68.94    2.12
  -1   7  11   15.53    1.28
  -6  -1  -9  154.85    8.65
  -6   1  -9  152.65    8.51
   0  14  -8   59.45    2.53
  -7  -1   8   67.82    2.01
  -7   1   8   65.81    1.95
  -9   5   1    6.37    0.88
  -9   5   1    6.92    0.99
  -8   1  -6    8.21    0.86
  -8  -1  -6    8.37    0.80
  -5  16   0    7.00    0.69
  -5  16   0    7.86    0.95
  -3  14  -7    2.94    0.74
  -3  14  -7    2.43    0.58
  -6  13  -4   79.28    4.59
  -6  13  -4   83.21    4.83
  -9  -4  -2    4.81    0.91
  -9   4  -2    4.80    0.88
  -9   4  -2    4.66    0.85
  -5  -3  10   79.91    4.80
  -5   3  10   79.34    4.78
  -7   8  -6    5.66    0.97
  -7   8  -6    4.20    0.73
  -5  14   5   39.14    1.95
  -7  11   4   46.11    2.21
  -7  11   4   48.02    2.29
  -5   0 -10  213.87   11.85
  -5  13   6   19.93    1.33
  -9   5  -1   14.09    1.04
  -9   5  -1   14.81    1.17
  -1   7 -11   31.99    1.60
  -5   7  -9   38.18    1.92
  -5   7  -9   37.20    1.71
  -2   6 -11   14.26    0.97
  -3  11   9  151.83    8.62
  -5 -10   8   15.11    1.29
  -5  10   8   17.10    1.34
  -5   1 -10    2.15    0.61
  -5  -1 -10    2.60    0.56
  -7 -10   5    1.86    0.83
  -9  -2  -3   96.37    5.62
  -9   2  -3   92.03    5.36
  -9   3   3   -0.54    0.79
  -9  -3   3   -0.21    0.85
  -5  16   1  148.31    8.28
  -5  16   1  149.63    8.53
  -4  16   4   99.59    5.78
  -6   2  -9    3.43    0.64
  -7   2   8   89.24    5.33
  -7  -2   8   90.87    5.39
  -4  13  -7  209.10   11.69
  -4  13  -7  212.22   11.82
  -8  -2  -6   43.88    2.02
  -8   2  -6   41.06    1.90
  -3  18   0  154.35    8.74
  -1  14   8  103.89    5.98
   0  19   0   -0.00    0.60
  -3   4 -11  121.79    6.87
  -5  16  -1  137.79    7.97
  -5  16  -1  147.45    8.23
  -8  10   0  135.28    7.67
  -8  10   0  130.65    7.40
  -6   7  -8    1.53    0.77
  -6   7  -8    1.86    0.65
  -2  16   6   62.35    1.65
  -6  11  -6    0.57    0.70
  -1  14  -8   19.86    1.18
  -1  14  -8   20.84    1.31
  -6  -4   9   18.84    1.40
  -2  18   3   27.81    1.52
   2  18  -3   26.04    1.44
  -8   8   4    9.79    1.06
  -8   9   3  236.41   13.26
  -8   9   3  252.02   14.03
  -4   7  10   46.12    2.28
  -4  -7  10   51.42    2.68
  -5   2 -10   21.94    1.16
  -3  18   1  269.31    7.73
   3  18  -1  274.39    7.81
  -2  12   9   19.31    1.28
  -4  16  -4    0.15    0.51
  -8  10   1   53.74    3.90
  -8  10   1   55.81    4.03
   0   0  12   40.97    2.22
  -5  14  -5   50.45    3.59
  -5  14  -5   53.05    3.83
   0  19  -1   19.65    1.63
   0  19   1   20.01    1.65
  -3  18  -1  310.72    8.73
  -3  18  -1  304.58    8.67
  -2  18  -3  218.89    6.42
  -2  18  -3  219.42    6.40
  -2  15   7   30.44    2.36
  -4  17   2    0.23    0.68
  -8   4   6    2.50    0.95
  -8  -4   6    0.98    0.88
  -3   5  11    9.24    1.08
  -7  11  -4    4.77    0.74
  -7  11  -4    4.33    0.80
  -6  14   3   94.89    3.29
  -6  14   3   93.48    3.04
  -8   6  -5   82.70    2.76
  -8   6  -5   77.80    3.14
  -2  16  -6  374.44   10.45
  -7   6  -7   13.71    1.23
  -7   6  -7   12.07    1.24
   0  -1  12   65.96    2.23
   0   1  12   69.26    2.73
  -9   5   2  106.20    3.56
   0  18  -4    6.14    0.69
   0  18  -4    5.39    0.68
  -3  11  -9   25.81    1.98
  -3  11  -9   24.70    1.99
  -8  10  -1  129.36    4.02
  -8  10  -1  129.65    4.11
  -5  13  -6   14.22    1.24
  -5  13  -6   11.60    1.14
  -7  12   3   15.06    1.52
  -7  12   3   12.98    1.31
  -3  17   4   68.43    2.47
  -3  13   8    4.21    0.83
  -9  -3  -3   95.28    3.43
  -9   3  -3  116.19    3.68
   1  19   0   75.59    2.60
  -1  19   0   78.42    2.73
  -4  17  -2   11.28    1.18
  -4  17  -2   11.30    1.06
  -6   3  -9   24.19    1.86
  -7  -3   8   83.48    3.03
  -7   3   8   85.50    3.07
  -5  15   4   37.89    2.88
  -8   3  -6    0.29    0.61
  -8  -3  -6    0.74    0.67
  -5  -4  10   50.08    3.76
  -5   4  10   46.67    3.52
  -2  15  -7   56.97    4.00
  -2  15  -7   57.34    4.12
  -1   0  12   10.43    1.21
  -2  12  -9    1.59    0.68
  -5  -8   9  104.94    3.61
  -5   8   9   96.55    3.35
  -4  10   9   81.45    3.18
  -7  10  -5   31.03    2.38
  -5  12   7   17.89    1.65
  -4   0  11    0.64    0.98
  -7   0  -8   45.28    3.24
  -2  10  10   38.91    2.95
  -6  10   7  134.42    4.32
  -6 -10   7  134.41    4.82
  -9   6   0    0.20    0.85
  -9   6   0   -0.60    0.73
  -9   4   3  125.12    4.15
  -3  17  -4   19.76    1.66
  -3  17  -4   20.41    1.62
  -5  10  -8  265.69    7.73
  -5  10  -8  241.28    7.21
  -1   1  12  115.35    3.83
  -1  -1  12  120.73    3.99
  -5  16   2  151.49    4.67
  -5  16   2  139.80    4.17
   0   2  12    3.86    0.96
  -3   9  10   55.05    4.01
  -8   9  -3  248.37    7.46
  -8   9  -3  250.20    7.14
  -6  14  -3  162.11    5.06
  -6  14  -3  165.84    4.89
   2  17  -5  445.42    6.21
  -2  17   5  435.47   12.02
  -1  19   1  117.89    3.82
   1  19  -1  102.83    3.26
  -4  -1  11    5.72    0.99
  -4   1  11    5.09    0.96
  -9   5  -2  108.13    3.60
  -9   5  -2  103.93    3.38
  -1  19  -1    0.06    0.61
   1  19   1   -0.07    0.56
  -7   1  -8   63.92    4.73
  -7  -1  -8   68.33    2.33
  -4  12   8   29.54    2.33
  -9   0   4   24.83    2.10
  -5   3 -10    0.28    0.53
  -1  18   4  156.09    4.69
   1  18  -4  150.09    4.78
  -6   8   8   56.27    4.13
  -6  -8   8   52.39    3.98
  -7  -9   6   -0.03    0.91
  -7  -7   7    1.68    0.85
  -7   7   7    1.89    0.89
   1   0  12   27.12    2.25
  -1   0 -12   17.67    1.47
  -9   6   1    5.98    0.89
  -9   6   1    4.36    0.79
  -2   7  11   61.28    4.45
  -8   8  -4   14.43    1.33
  -8   8  -4   13.33    1.35
  -7  12  -3  104.63    3.45
  -7  12  -3  107.58    3.39
  -1  18  -4    0.97    0.64
  -1  18  -4    0.30    0.56
  -9   1   4   70.16    2.66
  -9  -1   4   67.87    2.69
  -5  16  -2   25.71    1.96
  -7  13   0    7.84    0.80
  -7  13   0    9.07    0.93
   0   8  11   32.90    2.58
   0   8 -11   25.10    2.64
  -5  15  -4  117.04    4.84
  -5  15  -4  124.61    3.92
  -2  17  -5    5.50    0.68
  -2  17  -5    4.61    0.63
  -3  13  -8   22.12    1.81
  -3  13  -8   19.82    1.58
   1   1  12   -0.03    0.76
  -1   1 -12   -0.08    0.56
  -8   7   5    1.38    0.85
  -8  -7   5    1.02    0.75
  -8  10   2   51.86    3.80
  -8  10   2   49.70    3.65
  -3   5 -11  128.78    3.91
  -9   6  -1   13.39    1.36
  -1   2  12    0.04    0.80
  -1  -2  12    0.90    0.85
  -3  18   2   62.16    4.42
  -4   7 -10   82.75    2.68
  -4   7 -10   82.91    2.96
  -2  10 -10   70.21    2.44
  -2  10 -10   70.76    2.35
  -4  -2  11    2.52    0.91
  -4   2  11    3.78    0.97
  -7   2  -8   65.22    1.44
  -7  -2  -8   66.55    2.24
  -7  13   1    3.19    0.83
  -7  13   1    2.69    0.70
   0  19  -2   40.09    2.92
   0  19   2   44.76    3.25
  -3  18  -2    1.08    0.76
  -3  18  -2    0.97    0.51
  -6  -5   9  137.63    4.48
  -6   5   9  128.96    4.33
  -9  -2   4   13.47    1.36
  -9   2   4   14.76    1.47
  -6  15   0    0.78    0.57
  -9   4  -3    3.74    0.76
  -9  -4  -3    4.75    0.94
   0   3  12   90.97    3.14
  -7  13  -1    4.99    0.72
  -7  13  -1    4.97    0.90
  -2  14   8   17.82    1.59
  -1   8  11   17.89    1.63
  -6   4  -9   79.74    2.60
   1   2  12    7.17    0.92
  -1   2 -12    4.84    0.70
  -7  -4   8    0.65    0.94
  -7   4   8   -0.71    0.91
  -2   7 -11  129.79    3.98
  -8   4  -6   16.79    1.47
  -8  -4  -6   18.38    1.57
  -3   9 -10  202.18    5.77
  -3   9 -10  182.80    6.07
  -8  -5   6   37.78    2.95
  -8   5   6   40.99    3.14
  -5  12  -7    0.20    0.52
  -5  12  -7    0.08    0.58
  -8  10  -2    4.15    0.82
  -8  10  -2    4.39    0.82
  -4  10  -9  152.47    4.49
  -4  10  -9  149.17    4.56
   0  11 -10   72.78    2.53
   0  13  -9    7.89    0.83
   0  13  -9    8.35    0.83
  -4  12  -8   75.15    2.67
  -6  15   1    5.45    0.71
  -1   8 -11   -0.04    0.65
  -6  10  -7   37.94    2.92
  -6  10  -7   47.49    3.41
  -9   0  -4    0.95    0.75
  -5   8  -9   30.89    2.40
  -5   8  -9   39.14    2.85
  -4   0 -11   -0.06    0.53
  -5  -5  10   56.60    4.19
  -5   5  10   55.21    4.08
   1  19  -2    2.41    0.64
  -1  19   2    2.07    0.68
  -5   4 -10    7.16    0.68
  -3   6  11  329.60    9.52
  -6  15  -1   77.05    2.73
  -6  15  -1   72.40    2.45
  -2  14  -8  199.69    5.76
  -2  14  -8  191.89    5.69
  -1   3  12  341.71    9.67
  -1  -3  12  323.31    9.28
  -9   6   2   70.85    2.67
  -9   6   2   78.03    2.76
  -1  19  -2    9.11    0.81
  -1  19  -2    9.51    0.71
  -9  -1  -4    1.41    0.62
  -9   1  -4    1.70    0.74
  -4   3  11   -0.37    0.79
  -4   1 -11    6.54    0.67
  -7   3  -8   32.00    2.38
  -7   9  -6    0.09    0.63
  -7   9  -6    0.44    0.69
  -4  17   3    1.73    0.79
  -9   5   3   14.92    1.41
  -6  13   5   19.17    1.75
  -6  13   5   17.22    1.51
  -1  11  10    9.45    0.91
  -1  13   9  165.55    5.08
  -6   8  -8    0.18    0.72
  -6   8  -8    0.30    0.61
  -9  -3   4   10.95    1.30
  -9   3   4   11.01    1.32
  -8   7  -5    6.38    0.83
  -8   7  -5    8.91    0.81
  -7   7  -7  228.08    6.53
  -7   7  -7  193.18    6.00
  -2  19   0    6.36    0.84
  -2   0  12   72.02    2.84
   1   3  12    4.78    0.82
  -1   3 -12    3.73    0.62
  -7  13   2    6.08    0.95
  -7  13   2    5.30    0.74
  -4  -8  10   63.37    4.75
  -4   8  10   58.84    4.29
  -4  17  -3   28.79    2.15
  -4  17  -3   30.29    2.37
  -1  13  -9   55.89    3.97
  -1  13  -9   61.92    4.38
  -1  11 -10  124.24    4.77
  -1  11 -10  119.70    3.76
  -2   1  12    1.80    0.91
  -2  -1  12    2.03    0.88
  -9   2  -4    2.66    0.77
  -9  -2  -4    2.05    0.76
  -6  12   6  328.45    9.34
  -6 -12   6  338.45   10.87
  -6  12   6  340.49    9.60
  -9   6  -2    2.19    0.82
  -9   6  -2    2.18    0.75
  -4   2 -11    3.50    0.61
  -4  15   6   16.82    1.58
   0   4  12    9.44    0.95
  -5  16   3   25.96    2.07
   0  16  -7   15.46    1.42
   0  16  -7   14.76    1.38
   2  19  -1    4.40    0.68
  -2  19   1    4.94    0.78
   0  17  -6   81.32    2.90
   0  17  -6   82.07    2.81
  -8   9   4  122.53    3.91
  -9   7   0   44.51    3.31
  -9   7   0   41.57    3.12
  -8   0   7   -1.14    0.93
   2  18  -4   54.56    3.90
  -2  18   4   59.86    4.26
  -2  19  -1  232.42    6.85
  -7  13  -2   13.32    1.34
  -7  13  -2   11.63    1.16
  -5  11   8   -0.40    0.83
  -5 -11   8    0.15    0.88
  -8  -1   7    0.68    0.88
  -8   1   7    0.11    0.72
  -7  11   5   23.73    1.99
  -6  15   2   86.73    3.02
  -6  15   2   81.22    2.69
  -3   6 -11   98.12    3.09
  -9   5  -3   21.35    1.80
  -9   5  -3   21.77    1.81
  -9  -5  -3   22.16    1.88
  -6  14   4  321.03    8.99
  -6  14   4  330.93    9.45
  -6   5  -9   15.43    1.38
  -2  18  -4   29.36    2.19
  -2  18  -4   22.48    1.79
  -2   2  12    7.84    0.92
  -2  -2  12    7.95    1.04
  -7  -5   8    8.73    1.11
  -7   5   8    9.04    1.08
  -9   7   1   44.69    3.34
  -9   7   1   41.13    3.12
  -8   5  -6   69.03    2.36
  -6  13  -5  210.89    6.13
  -6  13  -5  244.24    7.05
  -3  16   6   21.86    1.84
  -8  10   3  127.63    4.10
  -8  10   3  136.51    4.41
  -7  12   4   49.39    3.60
  -5  16  -3   13.20    1.17
  -5  16  -3   13.57    1.31
  -1   4  12  100.03    3.60
  -4  14   7    7.64    0.94
  -8  11   0    1.66    0.86
  -8  11   0    2.04    0.80
  -6   6   9  198.00    5.97
  -6  -6   9  195.77    6.74
  -4  16   5   97.17    3.28
  -4   4  11   77.92    2.90
  -3  18   3   41.53    3.08
  -3  12   9   60.33    4.34
  -7   4  -8  106.77    3.27
   2   1  12    4.40    0.93
  -2   1 -12    2.04    0.55
   1  16  -7    1.01    0.57
  -9   7  -1   54.58    3.97
  -9   7  -1   61.31    4.39
  -6  15  -2   98.67    3.11
  -6  15  -2  100.47    3.32
  -7  -8   7   91.53    3.55
   1  17  -6    4.30    0.80
  -5   9   9    0.76    0.91
  -5  -9   9    0.70    1.01
  -4  15  -6    5.77    0.71
  -4  15  -6    6.03    0.79
  -3  15   7    7.76    0.88
  -9   3  -4  158.46    4.80
  -9  -3  -4  163.13    5.24
  -2   8  11   80.26    2.91
  -4   3 -11    2.73    0.56
   0  19  -3   29.99    2.31
  -8  -6   6   78.22    3.33
  -8   6   6   86.15    3.06
  -8   2   7   -0.87    0.93
  -8  -2   7    0.41    0.93
  -9  -4   4   73.71    2.86
  -9   4   4   67.28    2.51
  -5   5 -10  114.50    3.51
  -8  11   1  150.10    4.65
  -8  11   1  142.08    4.43
  -3  18  -3   -0.28    0.67
  -3  18  -3   -0.10    0.51
  -1  16  -7   10.60    1.16
  -1  16  -7    9.15    0.90
  -1  17  -6    1.53    0.62
  -1  17  -6    1.09    0.75
   1   4  12   24.20    2.03
  -1   4 -12   14.01    1.31
  -8   8   5   -0.00    0.82
  -6   9   8  135.43    4.35
  -6  -9   8  130.30    4.70
  -6  12  -6  131.04    4.00
  -6  12  -6  120.72    3.95
  -3  16  -6   99.50    3.38
  -3  16  -6   98.97    3.10
  -4   8 -10    2.18    0.60
  -4   8 -10    1.49    0.65
  -6  14  -4   79.68    2.65
  -6  14  -4   78.44    2.70
  -8  11  -1    0.49    0.79
  -8  11  -1    0.24    0.59
  -8   9  -4  132.73    4.34
  -5  -6  10    6.54    1.06
  -5   6  10    7.62    1.03
  -2   2 -12   -0.10    0.57
   2   2  12    0.55    0.78
  -5  14   6    0.50    0.85
  -4  16  -5   44.07    3.17
  -4  16  -5   43.37    3.18
   0   9 -11   51.34    3.69
  -3  10  10  129.32    4.29
  -8  10  -3   50.08    3.60
  -8  10  -3   46.76    3.42
  -2  -3  12   11.08    1.35
  -2   3  12   11.06    1.22
   0  15  -8    9.89    1.10
   0  15  -8   10.28    1.04
  -2  19   2    4.91    0.74
   2  19  -2    5.23    0.71
   0  18  -5   37.66    2.79
   0  18  -5   38.31    2.86
  -7  12  -4   15.42    1.44
  -7  12  -4   14.52    1.37
  -9   6   3   53.11    3.84
  -7 -10   6    8.55    1.09
  -3  15  -7   62.68    4.40
  -3  15  -7   66.46    2.36
  -4  11   9    6.12    0.94
  -7  11  -5  180.46    5.41
  -7  11  -5  178.83    5.29
  -3  17   5  101.83    3.38
   1  19  -3   36.67    2.74
  -1  19   3   37.70    2.80
  -4  14  -7   19.44    1.59
  -4  14  -7   18.97    1.63
  -3  12  -9    2.23    0.72
  -2   8 -11   11.90    1.20
  -2  19  -2    1.57    0.54
  -2  19  -2    2.09    0.63
  -2  11  10   71.58    2.64
  -6 -11   7    8.35    0.99
  -6  11   7    7.50    0.90
  -5  15   5   12.72    1.39
  -3   7  11   22.10    1.94
  -3  -7  11   21.29    1.90
  -2  13   9   44.18    3.27
  -1  19  -3   44.33    3.21
  -1  19  -3   41.51    3.06
  -5  11  -8   14.07    1.24
  -5  11  -8   14.83    1.38
   0   5  12    7.93    0.95
  -9   7   2   31.29    2.46
  -9   7   2   24.94    2.10
  -8  -3   7    0.06    0.90
  -8   3   7    0.25    0.92
  -4  18   0    2.62    0.79
  -1   9  11    7.38    0.94
  -9   0   5   -0.85    0.85
  -7  13   3   13.03    1.28
  -8   0  -7    0.08    0.62
  -3  17  -5   58.92    4.22
  -3  17  -5   69.71    2.33
  -9   4  -4    2.43    0.72
  -9  -4  -4    2.37    0.84
  -4   4 -11    1.18    0.60
   1  18  -5   74.26    4.98
  -1  18   5   74.23    4.97
  -9  -1   5    4.51    0.94
  -9   1   5    5.17    1.09
  -2   3 -12    4.01    0.69
  -8  11   2   37.09    2.72
  -8  11   2   39.30    2.89
  -5  17   0    0.65    0.49
  -5  17   0    0.76    0.80
  -8   1  -7   43.97    3.18
  -8  -1  -7   42.17    3.14
  -1  15  -8   -0.01    0.52
  -1   5  12   10.21    1.19
  -2  13  -9    6.85    0.88
  -1   9 -11   79.37    4.51
  -2  11 -10   47.40    3.41
  -2  11 -10   44.73    3.25
  -4  18   1  271.28   17.52
  -5  13   7   29.64    2.29
  -4   5  11   58.11    4.05
  -4  -5  11   64.18    4.48
  -5   9  -9  196.29    6.05
  -5   9  -9  194.80    5.66
  -1  18  -5   26.08    1.96
  -1  18  -5   21.87    1.06
  -9   7  -2    9.36    0.96
  -5  14  -6   15.96    0.88
  -5  14  -6   13.32    0.97
  -7   5  -8    1.34    0.52
  -3  10 -10  144.28    9.41
  -3  10 -10  159.44   10.29
  -3  14   8   70.42    4.76
  -9   6  -3   60.93    4.16
  -9  -6  -3   62.99    4.37
  -9   6  -3   50.47    3.72
  -8   8  -5  101.47    6.70
  -8   8  -5   94.71    6.35
  -4  18  -1   -0.07    0.45
  -4  18  -1   -0.22    0.65
  -7   8  -7   37.83    2.78
  -7   8  -7   37.83    2.68
  -6   6  -9   14.77    0.75
  -5  15  -5    1.61    0.73
  -5  15  -5    2.50    0.62
  -7  -6   8    2.33    0.95
  -8   6  -6  190.20   12.25
  -4  13   8  142.69    9.32
  -9   5   4   61.17    4.27
  -6  15   3   93.16    6.16
  -6  15   3   93.74    6.28
  -5  17   1   21.60    0.88
  -5  17   1   23.07    1.11
  -4  17   4    4.93    0.90
  -2  -4  12    0.35    0.95
  -2   4  12    0.39    0.77
  -1   5 -12   47.96    3.58
  -7  13  -3   51.66    3.59
  -7  13  -3   47.24    3.30
  -9  -2   5   39.77    2.93
  -9   2   5   39.36    2.92
  -6   0  10   66.06    4.62
  -6   9  -8   16.61    1.01
  -6   9  -8   15.97    0.87
  -8  11  -2   74.92    5.12
  -8  11  -2   96.53    6.39
  -4  11  -9   81.81    5.39
  -4  11  -9   75.24    5.11
  -3   7 -11  165.23   10.70
  -5  17  -1   44.34    3.13
  -5  17  -1   45.17    3.08
  -8   2  -7   36.15    2.58
  -8  -2  -7   37.63    2.67
  -2  16   7    4.81    0.77
  -7  10  -6    5.54    0.93
  -6   1  10   49.74    3.61
  -6  -1  10   53.43    3.88
  -9   8   0   12.55    1.04
  -9   8   0   14.94    1.05
  -4   9  10   38.01    2.80
  -4  -9  10   37.82    2.91
  -5   6 -10   -0.09    0.56
  -5   6 -10    0.11    0.57
  -2  17   6   99.27    6.57
  -6   7   9    1.81    0.78
  -6  -7   9    1.95    1.00
  -6  11  -7   27.24    2.15
  -8  -4   7    1.98    1.06
  -8   4   7    0.99    0.97
  -7  14   0  235.28   15.21
  -7  14   0  226.22   14.53
  -4  17  -4   70.20    4.67
  -6  15  -3    4.32    0.67
  -6  15  -3    6.45    0.73
  -3  14  -8   36.31    2.56
  -3  14  -8   36.13    2.57
  -9   8   1   49.99    3.52
  -9   8   1   56.08    3.89
  -5  16   4   38.02    2.78
  -3   0  12  315.33   20.27
  -8  -7   6   21.19    1.32
  -8   7   6   21.52    1.25
  -2  16  -7   37.31    2.62
  -2  17  -6  148.09    9.61
  -2  17  -6  158.67   10.25
  -3  19   0   44.05    3.10
  -3   1  12  183.26   12.01
  -3  -1  12  160.32   10.46
  -2   4 -12    2.98    0.67
  -6  -2  10   14.72    1.28
  -5  13  -7   46.66    3.20
  -5  13  -7   48.32    3.36
  -7  14   1  433.95   27.66
  -7  14   1  484.34   30.93
  -9   0  -5    0.01    0.73
  -9   8  -1   20.40    1.11
  -9   8  -1   21.36    1.16
  -4  18   2  187.75   12.15
  -7   0   9   -0.14    0.81
  -4  13  -8    9.73    0.81
  -4  13  -8    9.84    0.88
  -9   3   5   13.46    1.23
  -9  -3   5   13.32    1.11
  -5  -7  10  135.30    8.91
  -5   7  10  122.75    8.14
  -8  10   4  131.70    8.66
  -8  10   4  122.48    8.09
  -9   1  -5    4.39    0.78
  -9  -1  -5    3.95    0.75
  -8  -3  -7    4.63    0.74
  -8   3  -7    5.94    0.76
   0   6  12    0.46    0.69
  -7  14  -1   11.49    0.80
  -7  14  -1   13.62    1.01
  -2  19   3   36.88    2.67
   2  19  -3   33.83    2.48
  -9   5  -4   22.65    1.04
  -9  -5  -4   24.22    1.99
  -4   5 -11  152.97    9.90
  -7   1   9   35.36    2.74
  -7  -1   9   35.96    2.79
   0  20   0    0.78    0.58
  -3  19   1  103.94    6.88
  -3  18   4   45.54    3.21
  -9   7   3    0.72    0.75
  -4  18  -2   14.35    0.80
  -4  18  -2   15.19    1.00
  -5  17   2   42.38    3.06
  -7  -9   7   16.05    1.31
  -5  16  -4  105.42    6.91
  -5  16  -4  129.50    8.49
   0  14  -9    9.07    0.76
  -3  19  -1   66.51    4.54
  -2  19  -3  159.85   10.36
  -2  19  -3  156.67   10.18
  -2   9  11   54.55    3.81
  -3  -2  12   51.87    3.75
  -3   2  12   52.97    3.74
  -1  12 -10  107.36    7.08
  -1  12 -10   99.27    6.60
  -2  15   8   44.54    3.14
   0  19  -4  209.33   13.67
   0  19  -4  228.71   14.81
  -8   9   5   19.24    1.24
  -9   2  -5    0.30    0.59
  -9  -2  -5    0.62    0.63
  -5  17  -2    0.36    0.48
  -5  17  -2   -0.46    0.56
  -3  18  -4    2.70    0.80
  -3  18  -4    3.96    0.57
  -1   6  12   69.20    4.73
  -4   9 -10  253.18   16.20
  -4   9 -10  242.49   16.35
  -5  10   9    3.93    0.96
  -5 -10   9    4.44    0.96
  -5   0  11   -0.14    0.79
  -2  -5  12    8.54    1.10
  -2   5  12    8.08    0.92
   2  18  -5  268.38   17.24
  -2  18   5  283.28   18.16
   0  20   1   68.01    4.57
   0  20  -1   71.96    4.84
  -4   6  11    4.02    0.95
  -4  -6  11    5.45    1.08
  -7  -2   9  281.63   18.14
  -7   2   9  282.91   18.31
  -7   6  -8  173.84   11.19
  -6  -3  10   -0.81    1.02
  -8  11   3    6.05    0.91
  -8  11   3    7.27    1.05
  -3   8  11  141.63    9.28
  -6  16   0   52.17    3.55
  -9   8   2    3.99    0.94
  -9   8   2    3.01    0.90
  -5   1  11    7.69    1.09
  -6  14   5    2.52    0.84
  -6  13   6   19.52    1.18
  -5 -12   8    1.12    0.93
  -5  12   8    2.38    0.84
  -9   6   4   23.07    1.25
  -7  12   5   17.98    1.08
  -7  12   5   16.85    1.15
  -1  20   0   77.40    5.16
   1  20   0   73.19    5.02
  -6 -10   8    1.54    0.88
  -6  10   8    1.29    0.95
  -2  15  -8   24.06    1.91
  -2  15  -8   23.60    1.80
  -2  18  -5   16.24    0.90
  -2  18  -5   16.55    0.99
  -3   1 -12   15.37    0.89
  -1   6 -12   12.96    1.32
  -2   9 -11    2.47    0.74
  -8  10  -4  188.74   13.46
  -8  10  -4  222.52   14.29
  -6   0 -10   33.86    2.37
  -8  -5   7    2.49    0.93
  -8   5   7    2.32    1.06
  -7  14   2   58.90    4.00
  -6  16   1    7.22    0.74
  -6  16   1    7.60    0.94
  -9   7  -3    2.89    0.74
  -9   7  -3    1.99    0.83
   1  19  -4    0.81    0.74
  -1  19   4    0.91    0.62
  -1  14  -9   46.62    3.26
  -1  14  -9   47.23    3.26
   0  10 -11    1.74    0.72
  -6   7  -9  123.45    8.00
  -6   7  -9  142.35    9.65
  -8  12   0   20.08    1.05
  -8  12   0   19.66    1.09
  -7  -7   8   59.04    4.17
  -8   7  -6   22.68    1.04
  -8   7  -6   23.65    1.99
  -3  -3  12  100.27    6.70
  -3   3  12  104.81    6.96
  -1  19  -4   21.21    1.09
  -1  19  -4   20.82    0.93
  -9  -4   5    7.51    1.12
  -9   4   5    6.09    0.89
  -6   1 -10    1.74    0.55
  -6  16  -1   38.73    2.70
  -8   4  -7    0.15    0.51
  -5   2  11   31.80    2.46
  -1  20   1   16.46    1.02
   1  20  -1   16.42    0.92
  -9   8  -2    3.40    0.80
  -9   8  -2    3.07    0.78
  -1  20  -1    6.89    0.81
  -2   5 -12   24.53    1.95
  -7  13   4   20.18    1.11
  -9   3  -5   49.51    3.42
  -9  -3  -5   62.62    4.34
  -8  12   1  231.24   14.88
  -8  12   1  234.55   15.12
  -3  19   2   94.13    6.24
  -3  11  10  143.48    9.38
  -8  11  -3   13.59    1.03
  -8  11  -3   12.32    0.90
  -3   2 -12   10.63    0.79
  -7  14  -2   67.22    4.51
  -7  14  -2   49.55    3.53
  -3  13   9   -0.20    0.73
  -7  -3   9   43.87    3.24
  -7   3   9   59.05    4.19
  -5   7 -10    9.73    0.79
  -5   7 -10    9.43    0.93
  -7  11   6   88.13    5.94
  -1  10  11   11.19    0.95
  -3  19  -2    4.18    0.83
  -3  19  -2    3.21    0.55
  -8  12  -1   12.45    0.94
  -8  12  -1   11.07    0.92
  -6   2 -10    1.68    0.58
  -6  14  -5   35.84    2.66
  -6  14  -5   41.15    2.91
  -3   8 -11    1.43    0.60
  -3   8 -11    1.90    0.74
  -8   9  -5   19.76    1.08
  -8   9  -5   21.27    1.04
  -7   9  -7   18.13    0.97
  -7   9  -7   17.60    1.03
 -10   1   0  246.19   15.90
  -6   4  10   69.20    4.74
  -6  -4  10   77.28    5.31
  -4  16   6   30.14    2.34
   0  20  -2    4.62    0.71
  -6  13  -6    5.85    0.78
  -6  13  -6    7.35    0.69
  -6  15   4   78.15    5.29
  -7   0  -9   -0.54    0.55
  -1  10 -11    2.08    0.72
  -4  12   9   11.20    1.01
  -7  12  -5   54.11    3.69
  -7  12  -5   53.98    4.22
  -6  -8   9   31.07    2.71
  -6   8   9   31.07    2.43
  -9   6  -4   36.00    2.57
  -5  10  -9   80.23    5.41
  -5  10  -9   79.34    5.24
  -4   6 -11    1.98    0.77
  -4   6 -11    1.37    0.60
  -2  12  10   56.25    3.92
  -6 -12   7   23.89    2.11
  -6  12   7   23.64    1.92
  -4  18   3    9.78    0.89
  -5  12  -8   18.51    1.02
  -7   1  -9   41.29    2.85
  -7  -1  -9   40.68    2.80
  -5  -3  11   39.78    3.02
  -5   3  11   38.74    2.89
  -4  15   7   24.35    1.96
  -8   8   6   42.85    3.08
  -8  -8   6   43.04    3.18
  -9   9   0   26.74    2.05
  -9   9   0   24.47    2.27
 -10   0  -1   -0.34    0.89
  -6  16   2    4.21    0.62
  -6  16   2    4.65    0.92
  -7  13  -4   51.61    3.55
  -7  13  -4   51.03    3.53
  -3   3 -12   15.74    0.83
  -5  17   3   14.00    1.10
 -10   2   0   55.67    3.93
  -3  13  -9    7.37    0.92
   0  17  -7   -0.04    0.70
   0  17  -7    0.42    0.67
  -3   4  12   41.98    3.06
  -3  -4  12   38.85    2.94
  -3  11 -10  118.05    7.66
  -3  11 -10  107.48    7.44
  -6  10  -8   21.30    0.87
  -6  10  -8   20.74    1.11
 -10  -1  -1    7.64    1.05
 -10   1  -1    6.29    0.90
  -4  18  -3    6.25    0.87
  -4  18  -3    5.88    0.68
  -2   6  12   40.78    3.02
  -5   1 -11  133.18    8.63
  -9   9   1    0.88    0.75
  -9   9   1    0.24    0.69
  -5   8  10    5.93    1.08
  -5  -8  10    5.79    1.14
  -6   3 -10  218.84   14.05
   1  20  -2   39.74    2.83
  -1  20   2   42.31    3.00
  -4  10  10    1.09    0.77
  -8  12   2  171.85   11.14
  -8  12   2  185.05   11.99
  -9   4  -5   37.31    2.63
  -9  -4  -5   46.27    3.24
 -10   2   1    7.75    0.95
  -6  16  -2   21.28    0.92
  -6  16  -2   14.37    1.05
  -7   2  -9   11.45    0.80
  -1  20  -2   69.78    4.71
  -4  16  -6   19.18    1.02
  -4  16  -6   19.43    0.93
  -3  16   7   22.60    1.13
  -2  12 -10    5.41    0.68
  -2  12 -10    6.14    0.74
  -6  15  -4   99.43    6.58
  -6  15  -4   89.10    5.86
  -7  -4   9   36.58    2.77
  -7   4   9   40.99    3.05
   0  18  -6  159.57   10.39
   0  18  -6  165.05   10.85
  -9   5   5    0.90    0.90
  -9  -5   5    0.54    0.85
  -3  17   6   10.23    0.86
  -2  14   9    1.38    0.68
  -9   8   3    0.26    0.81
  -9   8   3   -0.10    0.73
  -5  15   6    8.11    1.06
  -8   5  -7    0.30    0.62
  -5  17  -3  254.38   16.28
  -9   9  -1   39.04    2.94
  -9   9  -1   40.52    3.02
  -1   7  12   33.85    2.54
  -4  17   5   90.45    6.05
  -4   7  11   11.73    1.05
  -4  -7  11   13.00    1.30
  -7   7  -8   81.94    5.42
  -7  11  -6  159.75   10.76
  -8   6   7  290.47   18.68
  -8  -6   7  300.57   19.70
 -10  -2  -1    8.37    1.11
 -10   2  -1    6.76    0.89
   1  17  -7   99.49    6.58
  -2  20   0    8.55    0.95
  -5   2 -11   35.01    2.48
  -4  15  -7  188.74   12.17
  -4  15  -7  192.05   12.54
  -9   0   6  124.92    8.34
  -7  14   3   55.29    3.78
  -9   7   4   10.21    1.01
   2  19  -4    0.30    0.65
  -2  19   4    0.73    0.68
  -8  12  -2    9.78    0.90
  -8  12  -2   10.71    0.89
  -4  12  -9  103.97    6.81
  -4  12  -9   86.62    7.06
  -8   0   8   15.72    1.30
  -1  17  -7    2.32    0.71
  -1  17  -7    1.97    0.81
   0  16  -8    1.20    0.62
   0  16  -8    1.06    0.71
  -1   7 -12   64.68    5.81
 -10   3   0   11.55    1.11
 -10   1   2   66.13    4.55
  -2   6 -12    5.85    0.76
;

_shelx_hkl_checksum   83079

#==============================================================================
#     End of CIF
#==============================================================================
