# Supplementary material for: Solid State Structure and Hydrogen Bonding of Some Cyclic NH Carboximides
Source: MDPI journal article supplement (doi:10.3390/cryst13010150), 2023-01-15
Supplement: s1 [file s1 › 4.cif]

data_4
_audit_creation_date                               2020-08-21
_audit_creation_method                            'by CrystalStructure 4.3'


_publ_section_references
;
    ENTER OTHER REFERENCES

    Rigaku (2018). CrystalStructure. Version 4.3. 
    Rigaku Corporation, Tokyo, Japan.

    Sheldrick, G. M. (2014). Acta Cryst. (2014). A70, C1437.
    SHELXT Version 2018/2

    Sheldrick, G.M. (2008) SHELXL Version 2018/3, Acta Cryst. A64, 112-122.

    Rigaku Oxford Diffraction (2015), CrysAlisPro. version 1.171.39.8d.
    Rigaku Corporation, Tokyo, Japan

;


_chemical_formula_sum                             'C10 H11 N O2'
_chemical_formula_moiety                          'C10 H11 N O2'
_chemical_formula_weight                           177.20
_chemical_melting_point                            ?

#==============================================================================
# CRYSTAL DATA
_space_group_crystal_system                        monoclinic
_space_group_name_H-M_alt                         'P 1 21/c 1'
_space_group_name_Hall                            '-P 2ybc'
_space_group_IT_number                             14
loop_
_space_group_symop_id
_space_group_symop_operation_xyz
1   '+X,+Y,+Z'
2   '-X,1/2+Y,1/2-Z'
3   '-X,-Y,-Z'
4   '+X,-1/2-Y,-1/2+Z'
#------------------------------------------------------------------------------
_cell_length_a                                     10.3980(2)
_cell_length_b                                     6.53350(10)
_cell_length_c                                     12.8770(2)
_cell_angle_alpha                                  90.0000
_cell_angle_beta                                   105.469(2)
_cell_angle_gamma                                  90.0000
_cell_volume                                       843.11(3)
_cell_formula_units_Z                              4
_cell_measurement_reflns_used                      6804
_cell_measurement_theta_min                        4.85
_cell_measurement_theta_max                        74.94
_cell_measurement_temperature                      125
#------------------------------------------------------------------------------
_exptl_crystal_description                         prism
_exptl_crystal_colour                              colourless
_exptl_crystal_size_max                            0.120
_exptl_crystal_size_mid                            0.050
_exptl_crystal_size_min                            0.020
_exptl_crystal_density_diffrn                      1.396
_exptl_crystal_density_meas                        ?
_exptl_crystal_density_method                     'not measured'
_exptl_crystal_F_000                               376.00
_exptl_absorpt_coefficient_mu                      0.802
_exptl_absorpt_correction_type                     multi-scan
_exptl_absorpt_process_details
;
CrysAlisPro 1.171.39.8d (Rigaku Oxford Diffraction, 2015)
Empirical absorption correction using spherical harmonics,
 implemented in SCALE3 ABSPACK scaling algorithm.
;
_exptl_absorpt_correction_T_min                    0.895
_exptl_absorpt_correction_T_max                    0.984

#==============================================================================
# EXPERIMENTAL DATA

_diffrn_ambient_temperature                        125
_diffrn_radiation_type                            'Cu K\a'
_diffrn_radiation_wavelength                       1.54184
_diffrn_measurement_device_type                   'Rigaku XtaLAB P200'
_diffrn_measurement_method                         \w
_diffrn_detector_area_resol_mean                   5.811
_diffrn_reflns_number                              9087
_diffrn_reflns_av_unetI/netI                       0.0084
_diffrn_reflns_av_R_equivalents                    0.0159
_diffrn_reflns_theta_max                           75.133
_diffrn_reflns_theta_min                           4.412
_diffrn_reflns_theta_full                          67.684
_diffrn_measured_fraction_theta_max                0.978
_diffrn_measured_fraction_theta_full               0.989
_diffrn_reflns_Laue_measured_fraction_max          0.978
_diffrn_reflns_Laue_measured_fraction_full         0.989
_diffrn_reflns_point_group_measured_fraction_max   0.978
_diffrn_reflns_point_group_measured_fraction_full  0.989
_diffrn_reflns_limit_h_min                        -12
_diffrn_reflns_limit_h_max                         12
_diffrn_reflns_limit_k_min                        -8
_diffrn_reflns_limit_k_max                         8
_diffrn_reflns_limit_l_min                        -16
_diffrn_reflns_limit_l_max                         15
_diffrn_standards_number                           0
_diffrn_standards_interval_count                   .
_diffrn_standards_decay_%                          ?
_reflns_number_total                               1705
_reflns_number_gt                                  1672
_reflns_threshold_expression                       F^2^>2.0\s(F^2^)
_reflns_Friedel_coverage          0.000
_reflns_Friedel_fraction_max      .
_reflns_Friedel_fraction_full     .

#==============================================================================
# REFINEMENT DATA

_refine_special_details
;
    Refinement was performed using all reflections. The weighted 
    R-factor (wR) and goodness of fit (S) are based on F^2^.
    R-factor (gt) are based on F. The threshold expression of
    F^2^ > 2.0 sigma(F^2^) is used only for calculating R-factor (gt).
;
_refine_ls_structure_factor_coef                   Fsqd
_refine_ls_R_factor_all                            0.0394
_refine_ls_R_factor_gt                             0.0389
_refine_ls_wR_factor_ref                           0.1044
_refine_ls_wR_factor_gt                            0.1039
_refine_ls_number_restraints                       1
_refine_ls_hydrogen_treatment                      mixed
_refine_ls_number_reflns                           1705
_refine_ls_number_parameters                       122
_refine_ls_goodness_of_fit_ref                     1.094
_refine_ls_weighting_scheme                        calc
_refine_ls_weighting_details
           'w = 1/[\s^2^(Fo^2^)+(0.0576P)^2^+0.3735P] where P=(Fo^2^+2Fc^2^)/3'
_atom_sites_solution_hydrogens                     geom
_atom_sites_solution_primary                       direct
_atom_sites_solution_secondary                     difmap
_refine_ls_shift/su_max                            0.000
_refine_diff_density_max                           0.28
_refine_diff_density_min                          -0.24
_refine_ls_extinction_method                       none
_refine_ls_extinction_coef                         ?

loop_
_atom_type_symbol
_atom_type_description
_atom_type_scat_dispersion_real
_atom_type_scat_dispersion_imag
_atom_type_scat_source
  'C' 'C'  0.0181 0.0091 
;
International Tables for Crystallography
(Vol. C, Tables 4.2.6.8 and 6.1.1.4)
;
  'H' 'H'  0.0000 0.0000 
;
International Tables for Crystallography
(Vol. C, Table 6.1.1.4)
;
  'N' 'N'  0.0311 0.0180 
;
International Tables for Crystallography
(Vol. C, Tables 4.2.6.8 and 6.1.1.4)
;
  'O' 'O'  0.0492 0.0322 
;
International Tables for Crystallography
(Vol. C, Tables 4.2.6.8 and 6.1.1.4)
;

#==============================================================================
# ATOMIC COORDINATES AND THERMAL PARAMETERS

loop_
 _atom_site_label
 _atom_site_type_symbol
 _atom_site_fract_x
 _atom_site_fract_y
 _atom_site_fract_z
 _atom_site_U_iso_or_equiv
 _atom_site_adp_type
 _atom_site_occupancy
 _atom_site_site_symmetry_order  
 _atom_site_calc_flag
 _atom_site_refinement_flags_posn
 _atom_site_refinement_flags_adp
 _atom_site_refinement_flags_occupancy
 _atom_site_disorder_assembly
 _atom_site_disorder_group
O2 O 0.82038(9) 0.67580(12) 0.41442(7) 0.0212(2) Uani 1 1 d . . . . .
O9 O 0.51511(8) 0.16182(14) 0.32459(7) 0.0235(2) Uani 1 1 d . . . . .
N1 N 0.65237(9) 0.44261(15) 0.35074(7) 0.0156(2) Uani 1 1 d D . . . .
C2 C 0.77360(11) 0.50616(17) 0.41664(9) 0.0141(3) Uani 1 1 d . . . . .
C3 C 0.83438(11) 0.33014(16) 0.48997(9) 0.0146(3) Uani 1 1 d . . . . .
H3 H 0.923197 0.292660 0.479240 0.018 Uiso 1 1 calc R U . . .
C4 C 0.84831(12) 0.38174(18) 0.61033(9) 0.0186(3) Uani 1 1 d . . . . .
H4 H 0.905274 0.505575 0.633443 0.022 Uiso 1 1 calc R U . . .
C5 C 0.71095(13) 0.41162(19) 0.62602(9) 0.0202(3) Uani 1 1 d . . . . .
H5 H 0.683916 0.534850 0.653224 0.024 Uiso 1 1 calc R U . . .
C6 C 0.63078(12) 0.25032(19) 0.59843(9) 0.0187(3) Uani 1 1 d . . . . .
H6 H 0.542686 0.247623 0.606665 0.022 Uiso 1 1 calc R U . . .
C7 C 0.69050(11) 0.07263(17) 0.55319(9) 0.0165(3) Uani 1 1 d . . . . .
H7 H 0.625374 -0.042590 0.532521 0.020 Uiso 1 1 calc R U . . .
C8 C 0.73493(11) 0.15224(17) 0.45486(9) 0.0145(3) Uani 1 1 d . . . . .
H8 H 0.777103 0.039137 0.423187 0.017 Uiso 1 1 calc R U . . .
C9 C 0.62019(11) 0.24442(18) 0.36950(9) 0.0154(3) Uani 1 1 d . . . . .
C10 C 0.90989(12) 0.1911(2) 0.67628(10) 0.0230(3) Uani 1 1 d . . . . .
H10A H 0.918252 0.215026 0.753724 0.028 Uiso 1 1 calc R U . . .
H10B H 1.000149 0.165528 0.667301 0.028 Uiso 1 1 calc R U . . .
C11 C 0.81952(13) 0.00299(18) 0.63678(10) 0.0204(3) Uani 1 1 d . . . . .
H11A H 0.867523 -0.097858 0.603569 0.024 Uiso 1 1 calc R U . . .
H11B H 0.796634 -0.063392 0.698631 0.024 Uiso 1 1 calc R U . . .
H1 H 0.5966(16) 0.532(2) 0.2962(11) 0.040(5) Uiso 1 1 d D . . . .

loop_
 _atom_site_aniso_label
 _atom_site_aniso_U_11
 _atom_site_aniso_U_22
 _atom_site_aniso_U_33
 _atom_site_aniso_U_23
 _atom_site_aniso_U_13
 _atom_site_aniso_U_12
O2 0.0240(5) 0.0152(4) 0.0221(5) 0.0018(3) 0.0022(3) -0.0038(3)
O9 0.0201(5) 0.0314(5) 0.0154(4) -0.0035(3) -0.0014(3) -0.0105(3)
N1 0.0145(5) 0.0170(5) 0.0126(5) 0.0020(4) -0.0013(4) 0.0004(4)
C2 0.0144(5) 0.0154(5) 0.0118(5) -0.0004(4) 0.0021(4) 0.0003(4)
C3 0.0134(5) 0.0144(5) 0.0143(5) 0.0016(4) 0.0004(4) -0.0005(4)
C4 0.0215(6) 0.0181(6) 0.0120(5) 0.0002(4) -0.0028(4) -0.0050(4)
C5 0.0290(6) 0.0179(6) 0.0129(5) -0.0010(4) 0.0041(4) 0.0029(5)
C6 0.0189(6) 0.0233(6) 0.0136(5) 0.0016(4) 0.0040(4) 0.0017(4)
C7 0.0187(6) 0.0151(5) 0.0145(5) 0.0007(4) 0.0023(4) -0.0029(4)
C8 0.0161(5) 0.0129(5) 0.0134(5) -0.0011(4) 0.0018(4) -0.0006(4)
C9 0.0166(6) 0.0183(6) 0.0106(5) -0.0025(4) 0.0025(4) -0.0026(4)
C10 0.0203(6) 0.0269(7) 0.0169(6) 0.0068(5) -0.0035(5) -0.0011(5)
C11 0.0248(6) 0.0177(6) 0.0171(6) 0.0053(4) 0.0028(5) 0.0027(5)

#==============================================================================
_computing_data_collection
                                    'CrysAlisPro 1.171.39.8d (Rigaku OD, 2015)'
_computing_cell_refinement
                                    'CrysAlisPro 1.171.39.8d (Rigaku OD, 2015)'
_computing_data_reduction
                                    'CrysAlisPro 1.171.39.8d (Rigaku OD, 2015)'
_computing_structure_solution
                                      'SHELXT Version 2018/2 (Sheldrick, 2014)'
_computing_structure_refinement
                                      'SHELXL Version 2018/3 (Sheldrick, 2008)'
_computing_publication_material
                                          'CrystalStructure 4.3 (Rigaku, 2018)'
_computing_molecular_graphics                     'CrystalStructure 4.3'

#==============================================================================
# MOLECULAR GEOMETRY

_geom_special_details
;
 All esds (except the esd in the dihedral angle between two l.s. planes)
 are estimated using the full covariance matrix.  The cell esds are taken
 into account individually in the estimation of esds in distances, angles
 and torsion angles; correlations between esds in cell parameters are only
 used when they are defined by crystal symmetry.  An approximate (isotropic)
 treatment of cell esds is used for estimating esds involving l.s. planes.
;

loop_
 _geom_bond_atom_site_label_1
 _geom_bond_atom_site_label_2
 _geom_bond_distance
 _geom_bond_site_symmetry_2
 _geom_bond_publ_flag
O2 C2 1.2138(14) . ?
O9 C9 1.2176(14) . ?
N1 C9 1.3748(15) . ?
N1 C2 1.3824(14) . ?
N1 H1 0.975(5) . ?
C2 C3 1.5150(15) . ?
C3 C8 1.5412(14) . ?
C3 C4 1.5547(15) . ?
C3 H3 1.0000 . ?
C4 C5 1.5076(17) . ?
C4 C10 1.5465(16) . ?
C4 H4 1.0000 . ?
C5 C6 1.3318(17) . ?
C5 H5 0.9500 . ?
C6 C7 1.5052(16) . ?
C6 H6 0.9500 . ?
C7 C11 1.5476(15) . ?
C7 C8 1.5490(15) . ?
C7 H7 1.0000 . ?
C8 C9 1.5148(15) . ?
C8 H8 1.0000 . ?
C10 C11 1.5485(17) . ?
C10 H10A 0.9900 . ?
C10 H10B 0.9900 . ?
C11 H11A 0.9900 . ?
C11 H11B 0.9900 . ?

loop_
 _geom_angle_atom_site_label_1
 _geom_angle_atom_site_label_2
 _geom_angle_atom_site_label_3
 _geom_angle
 _geom_angle_site_symmetry_1
 _geom_angle_site_symmetry_3
 _geom_angle_publ_flag
C9 N1 C2 113.57(9) . . ?
C9 N1 H1 124.3(11) . . ?
C2 N1 H1 122.2(11) . . ?
O2 C2 N1 124.43(10) . . ?
O2 C2 C3 127.20(10) . . ?
N1 C2 C3 108.37(9) . . ?
C2 C3 C8 104.71(9) . . ?
C2 C3 C4 111.66(9) . . ?
C8 C3 C4 109.44(9) . . ?
C2 C3 H3 110.3 . . ?
C8 C3 H3 110.3 . . ?
C4 C3 H3 110.3 . . ?
C5 C4 C10 107.40(10) . . ?
C5 C4 C3 108.78(9) . . ?
C10 C4 C3 106.72(10) . . ?
C5 C4 H4 111.2 . . ?
C10 C4 H4 111.2 . . ?
C3 C4 H4 111.2 . . ?
C6 C5 C4 114.19(10) . . ?
C6 C5 H5 122.9 . . ?
C4 C5 H5 122.9 . . ?
C5 C6 C7 114.84(10) . . ?
C5 C6 H6 122.6 . . ?
C7 C6 H6 122.6 . . ?
C6 C7 C11 109.15(9) . . ?
C6 C7 C8 107.53(9) . . ?
C11 C7 C8 105.97(9) . . ?
C6 C7 H7 111.3 . . ?
C11 C7 H7 111.3 . . ?
C8 C7 H7 111.3 . . ?
C9 C8 C3 104.48(9) . . ?
C9 C8 C7 112.19(9) . . ?
C3 C8 C7 109.66(9) . . ?
C9 C8 H8 110.1 . . ?
C3 C8 H8 110.1 . . ?
C7 C8 H8 110.1 . . ?
O9 C9 N1 124.30(11) . . ?
O9 C9 C8 127.00(11) . . ?
N1 C9 C8 108.69(9) . . ?
C4 C10 C11 109.44(9) . . ?
C4 C10 H10A 109.8 . . ?
C11 C10 H10A 109.8 . . ?
C4 C10 H10B 109.8 . . ?
C11 C10 H10B 109.8 . . ?
H10A C10 H10B 108.2 . . ?
C7 C11 C10 109.42(9) . . ?
C7 C11 H11A 109.8 . . ?
C10 C11 H11A 109.8 . . ?
C7 C11 H11B 109.8 . . ?
C10 C11 H11B 109.8 . . ?
H11A C11 H11B 108.2 . . ?

loop_
 _geom_torsion_atom_site_label_1
 _geom_torsion_atom_site_label_2
 _geom_torsion_atom_site_label_3
 _geom_torsion_atom_site_label_4
 _geom_torsion
 _geom_torsion_site_symmetry_1
 _geom_torsion_site_symmetry_2
 _geom_torsion_site_symmetry_3
 _geom_torsion_site_symmetry_4
 _geom_torsion_publ_flag
C9 N1 C2 O2 -179.18(10) . . . . ?
C9 N1 C2 C3 0.54(13) . . . . ?
O2 C2 C3 C8 -178.06(11) . . . . ?
N1 C2 C3 C8 2.23(11) . . . . ?
O2 C2 C3 C4 63.61(15) . . . . ?
N1 C2 C3 C4 -116.10(10) . . . . ?
C2 C3 C4 C5 63.96(12) . . . . ?
C8 C3 C4 C5 -51.51(12) . . . . ?
C2 C3 C4 C10 179.54(9) . . . . ?
C8 C3 C4 C10 64.08(11) . . . . ?
C10 C4 C5 C6 -56.92(13) . . . . ?
C3 C4 C5 C6 58.23(13) . . . . ?
C4 C5 C6 C7 -2.16(14) . . . . ?
C5 C6 C7 C11 57.90(13) . . . . ?
C5 C6 C7 C8 -56.62(13) . . . . ?
C2 C3 C8 C9 -3.86(11) . . . . ?
C4 C3 C8 C9 115.97(10) . . . . ?
C2 C3 C8 C7 -124.29(9) . . . . ?
C4 C3 C8 C7 -4.46(12) . . . . ?
C6 C7 C8 C9 -58.15(12) . . . . ?
C11 C7 C8 C9 -174.78(9) . . . . ?
C6 C7 C8 C3 57.48(11) . . . . ?
C11 C7 C8 C3 -59.15(11) . . . . ?
C2 N1 C9 O9 175.92(11) . . . . ?
C2 N1 C9 C8 -3.18(13) . . . . ?
C3 C8 C9 O9 -174.74(11) . . . . ?
C7 C8 C9 O9 -56.01(15) . . . . ?
C3 C8 C9 N1 4.33(11) . . . . ?
C7 C8 C9 N1 123.06(10) . . . . ?
C5 C4 C10 C11 58.79(13) . . . . ?
C3 C4 C10 C11 -57.72(12) . . . . ?
C6 C7 C11 C10 -50.08(12) . . . . ?
C8 C7 C11 C10 65.45(12) . . . . ?
C4 C10 C11 C7 -6.01(14) . . . . ?

loop_
_geom_hbond_atom_site_label_D
_geom_hbond_atom_site_label_H
_geom_hbond_atom_site_label_A
_geom_hbond_site_symmetry_D
_geom_hbond_site_symmetry_H
_geom_hbond_site_symmetry_A
_geom_hbond_distance_DA
_geom_hbond_distance_DH
_geom_hbond_distance_HA
_geom_hbond_angle_DHA
_geom_hbond_publ_flag
N1 H1 O9 . . 2_655 2.8432(12) 0.975(14) 1.878(13) 169.8(13) no

#==============================================================================
# Additional structures and associated data_? identifiers
# should be added at this point if there is more than one 
# structure analysis in the CIF.

_shelx_res_file
;
TITL DSAA12
    shelxl.res
    created by SHELXL-2018/3 at 15:33:29 on 21-Aug-2020
CELL  1.54184 10.39800 6.53350 12.87700 90.00000 105.46900 90.00000
ZERR  4 0.00020 0.00010 0.00020 0.00000 0.00200 0.00000
LATT 1
SYMM    -X, .50+Y, .50-Z
SFAC C H N O
UNIT 40 44 4 8
L.S. 20
FMAP 2
PLAN 5
WPDB -2
HTAB
BOND $H
CONF
LIST 4
TEMP -148.0
ACTA
SIZE 0.120 0.050 0.020
DFIX 0.9800 0.0050 N1 H1
WGHT    0.057600    0.373500
FVAR       1.83807
O2    4    0.820385    0.675802    0.414421    11.00000    0.02400    0.01519 =
         0.02213    0.00176    0.00216   -0.00383
O9    4    0.515112    0.161822    0.324592    11.00000    0.02010    0.03135 =
         0.01544   -0.00354   -0.00144   -0.01048
N1    3    0.652368    0.442608    0.350740    11.00000    0.01453    0.01700 =
         0.01258    0.00199   -0.00127    0.00035
C2    1    0.773596    0.506164    0.416643    11.00000    0.01442    0.01540 =
         0.01183   -0.00042    0.00213    0.00033
C3    1    0.834379    0.330138    0.489969    11.00000    0.01338    0.01440 =
         0.01425    0.00157    0.00044   -0.00045
AFIX  13
H3    2    0.923197    0.292660    0.479240    11.00000   -1.20000
AFIX   0
C4    1    0.848311    0.381735    0.610331    11.00000    0.02150    0.01806 =
         0.01204    0.00022   -0.00277   -0.00501
AFIX  13
H4    2    0.905274    0.505575    0.633443    11.00000   -1.20000
AFIX   0
C5    1    0.710949    0.411622    0.626016    11.00000    0.02897    0.01793 =
         0.01287   -0.00102    0.00414    0.00289
AFIX  43
H5    2    0.683916    0.534850    0.653224    11.00000   -1.20000
AFIX   0
C6    1    0.630782    0.250325    0.598427    11.00000    0.01893    0.02332 =
         0.01361    0.00163    0.00402    0.00171
AFIX  43
H6    2    0.542686    0.247623    0.606665    11.00000   -1.20000
AFIX   0
C7    1    0.690501    0.072633    0.553190    11.00000    0.01874    0.01511 =
         0.01449    0.00074    0.00225   -0.00290
AFIX  13
H7    2    0.625374   -0.042590    0.532521    11.00000   -1.20000
AFIX   0
C8    1    0.734932    0.152239    0.454855    11.00000    0.01608    0.01294 =
         0.01335   -0.00106    0.00176   -0.00063
AFIX  13
H8    2    0.777103    0.039137    0.423187    11.00000   -1.20000
AFIX   0
C9    1    0.620194    0.244416    0.369500    11.00000    0.01657    0.01834 =
         0.01062   -0.00253    0.00248   -0.00258
C10   1    0.909889    0.191147    0.676282    11.00000    0.02025    0.02691 =
         0.01687    0.00677   -0.00350   -0.00110
AFIX  23
H10A  2    0.918252    0.215026    0.753724    11.00000   -1.20000
H10B  2    1.000149    0.165528    0.667301    11.00000   -1.20000
AFIX   0
C11   1    0.819520    0.002992    0.636784    11.00000    0.02483    0.01774 =
         0.01706    0.00527    0.00279    0.00272
AFIX  23
H11A  2    0.867523   -0.097858    0.603569    11.00000   -1.20000
H11B  2    0.796634   -0.063392    0.698631    11.00000   -1.20000
AFIX   0
H1    2    0.596613    0.531679    0.296179    11.00000    0.03971
HKLF 4


REM  DSAA12
REM wR2 = 0.1044, GooF = S = 1.094, Restrained GooF = 1.094 for all data
REM R1 = 0.0389 for 1672 Fo > 4sig(Fo) and 0.0394 for all 1705 data
REM 122 parameters refined using 1 restraints

END

WGHT      0.0576      0.3735

REM Instructions for potential hydrogen bonds
EQIV $1 x, y-1, z
HTAB C8 O2_$1
EQIV $2 -x+1, y+1/2, -z+1/2
HTAB N1 O9_$2

REM Highest difference peak  0.284,  deepest hole -0.242,  1-sigma level  0.064
Q1    1   0.8771  0.2813  0.6466  11.00000  0.05    0.28
Q2    1   0.7943  0.2445  0.4705  11.00000  0.05    0.28
Q3    1   0.8102  0.4151  0.4556  11.00000  0.05    0.26
Q4    1   0.8634  0.1029  0.6535  11.00000  0.05    0.23
Q5    1   0.6839  0.1967  0.4134  11.00000  0.05    0.22
;

_shelx_res_checksum   40623

_shelx_hkl_file
;
   0   0   1    0.11    0.07
   0   0  -1    0.18    0.07
  -1   0   0  922.91    2.09
   1   0   0  907.26    2.08
   1   0  -1    0.65    0.12
  -1   0   1    1.10    0.12
  -1   0  -1    0.07    0.12
   1   0   1    0.15    0.11
   0   1   0    0.04    0.31
   0  -1   0    0.19    0.17
  -1   0   2  311.72    1.21
   1   0  -2  318.84    1.24
   0   1  -1 1185.74    2.60
   0   1   1 1187.88    2.37
   0  -1  -1 1182.28    2.37
   0  -1   1 1156.53    3.40
   0  -1   1 1142.95    2.58
  -1   1   1 4592.28    9.42
   1   1  -1 4138.86    8.90
   2   0  -1   32.29    0.39
  -2   0   1    0.00    0.19
   1   1   1  647.23    1.70
  -1  -1  -1  742.71    1.79
   1  -1   1  682.54    1.94
  -1   1  -1  705.53    2.00
  -1   0  -2 1718.21    4.10
   0  -1   2 2339.96    4.97
   0   1  -2 1915.85    4.87
   0  -1  -2 2486.39    4.80
   0   1   2 2407.69    4.74
   0  -1   2 2041.21    5.25
   1  -1  -2 9999.00   19.15
  -2   0  -1   -0.09    0.22
   1   0  -3    0.01    0.23
  -1   0   3    1.80    0.12
   0   0  -3    0.15    0.23
  -2   1   1  601.84    1.92
  -2  -1   1  593.62    1.79
  -2   1   0 2474.49    5.49
   1   1   2 2027.95    4.45
  -2   1   2 3476.94    7.63
  -2   0   3   -0.10    0.32
  -2  -1  -1 1626.60    3.88
  -1  -1   3 5136.47    9.63
   1   1  -3 4641.85   10.33
  -1   0  -3    1.20    0.29
   0  -1  -3  551.17    1.92
   0  -1   3  474.96    2.04
  -3   0   1   -0.15    0.26
  -3   0   2 1145.46    3.37
   0   2   0  462.48    2.77
  -2   1   3 3229.11    7.19
  -2  -1   3 2953.83    7.30
   0   2   1 2618.94    6.18
   0  -2   1 2881.77    3.29
  -1   2   0   82.92    0.53
  -1   2   0   84.71    1.21
  -1  -1  -3   31.28    0.47
  -1   2   1 1468.42    3.17
   1   2  -1 1505.82    5.20
  -1  -2   1 1408.15    2.99
  -1  -2   1 1412.82    3.00
  -2  -1  -2  943.93    2.85
  -3  -1   1  339.75    1.56
  -3   0  -1    0.07    0.29
   3   0  -3    0.18    0.17
  -3   0   3    0.54    0.28
  -3  -1   2 2564.45    5.93
  -3   1   2 2471.65    6.06
   1   2   1  236.65    1.97
  -1   2  -1  218.98    1.05
   0   2  -2   13.79    0.32
   0   2   2   13.41    0.68
   0   2   2   13.21    0.17
  -1  -2   2 1085.38    2.82
  -1   2   2 1089.45    2.59
  -1   2   2 1087.97    2.65
  -1   2   2 1080.87    4.60
  -2   0  -3    0.08    0.32
   0  -1  -4 3335.92    7.63
  -1   0  -4   63.88    0.84
  -2   2   1   54.02    0.94
  -2  -2   1   53.43    0.45
  -2  -2   1   55.18    0.48
  -3  -1  -1  498.93    2.07
  -2   1   4 7930.31   15.74
   2   1  -4 7545.91   15.80
  -1  -2  -2  485.71    1.44
  -1   2  -2  471.99    1.89
  -3   0  -2  275.50    1.74
  -2  -2   2  118.47    0.81
  -2   2   2  120.71    0.82
   2   2  -2  118.95    1.28
  -2  -1  -3 2704.72    6.51
  -2   2  -1  511.15    2.04
  -2  -2  -1  502.06    1.56
  -4   0   1    1.31    0.37
   1   2  -3   22.73    0.44
  -1   2   3   23.08    0.36
  -1   2   3   22.15    0.85
   1   0  -5    0.16    0.37
  -4   0   2 3384.99    8.08
   0   2   3 4018.39   10.54
   0  -2  -3 4002.12    8.29
   0   2   3 3991.36    8.06
  -1  -1  -4 2011.16    5.30
   2   0  -5    0.25    0.36
  -4   0   0 1969.14    5.49
   0   0  -5    0.21    0.33
  -3  -1  -2  344.49    1.80
  -3  -1   4 6074.52   13.12
  -3   1   4 6170.26   13.02
  -2   2   3    0.19    0.17
   2   2  -3    0.35    0.38
  -2   2   3    0.36    0.52
  -4   0   3    0.05    0.29
  -4  -1   1 1583.70    4.73
  -1   1   5   62.94    0.90
   1  -1  -5   74.15    0.88
  -4  -1   2 1143.07    3.77
  -1   2  -3 4892.27   10.62
  -2   2  -2 2627.17    6.54
  -2  -2  -2 2573.17    5.71
  -3   2   1 1861.41    4.90
  -3  -2   1 1830.32    4.52
  -2   0  -4 5981.16   13.18
  -2   1   5  281.28    1.86
  -2   1   5  267.58    1.70
  -4  -1   0 2457.57    6.41
  -4   0  -1    0.03    0.35
  -3  -2   0  667.66    2.24
  -3   2   0  685.61    2.66
  -3   2   2  757.18    2.74
  -3  -2   2  724.63    2.51
   0  -1  -5 3782.93    9.00
  -3   0  -3    0.23    0.35
  -3   0   5    0.15    0.34
  -4   1   3   23.33    0.59
  -4  -1   3   29.62    0.60
  -1   2   4 3633.72   10.47
   1   2  -4 3626.44    8.46
  -1   0  -5    0.24    0.33
  -4   0   4   41.20    0.74
   4   0  -4   34.29    0.52
   0   2  -4  466.32    2.24
   0  -2  -4  470.83    1.93
  -2  -1  -4 4200.20    9.68
  -3   2  -1 7327.05   15.36
  -2  -2   4 1038.65    3.80
   2   2  -4 1032.62    3.20
  -2   2   4 1047.23    3.34
  -2   2   4 1041.15    4.76
  -3  -2   3   19.32    0.42
  -3   2   3   20.05    0.62
  -3   2   3   19.98    0.46
  -4  -1  -1  216.62    1.55
  -3  -1  -3 6169.22   13.32
  -3  -1   5   96.80    1.17
  -3   1   5   66.39    0.92
  -1  -1  -5   34.20    0.67
   0   3   1  114.26    1.82
   0   3  -1  109.55    1.69
   1   0  -6  331.73    2.20
  -4   1   4  834.17    3.35
  -4  -1   4  855.45    3.37
  -4   0  -2 2316.04    6.79
  -1   3   0  899.00    1.89
  -1   3   0  881.69    1.86
   1   3  -1  407.17    3.21
  -1   3   1  385.32    3.09
  -1  -2  -4  564.44    2.26
  -1   2  -4  554.13    2.64
   1   3   1 3927.15   11.67
  -1   3  -1 4090.56    8.18
  -5   0   2 3264.49    8.57
   0   0  -6  194.22    1.71
  -5   0   1   -0.12    0.29
  -3  -2  -2  104.50    0.93
  -3   2  -2  100.69    1.11
   3   2  -4  179.95    1.41
  -3   2   4  177.42    1.29
  -4   0   5    0.15    0.33
   0   3  -2    8.81    0.59
   0   3  -2    9.61    0.23
   1   3  -2  671.50    4.11
  -1   3   2  667.64    4.33
   1  -1  -6  921.21    3.77
  -1   1   6  920.68    3.76
  -4   2   1 1092.74    3.90
  -4  -2   1  997.67    3.32
  -4  -1  -2 1513.91    4.99
  -5   0   3    0.04    0.32
  -1   2   5  746.18    4.20
   1   2  -5  726.80    3.26
  -4  -2   2 3217.70    7.72
  -4   2   2 3217.10    7.99
  -3   0  -4 2184.64    6.56
  -2   0  -5    0.01    0.36
  -2   1   6 4988.66   11.39
  -2   1   6 5254.81   12.01
  -3   0   6 1156.88    4.67
  -2   3   1   25.18    0.89
  -2   3   1   27.44    0.37
   2   3  -1   26.71    1.01
  -5   0   0   14.14    0.55
   2   3   0    0.78    0.66
  -2   3   0    0.91    0.49
  -2   3   0    1.13    0.17
  -2   2   5   36.44    0.64
  -2   2   5   27.89    0.86
  -4   2   0 1313.68    4.55
  -4  -2   0 1336.42    4.11
   1   3   2   77.08    1.56
  -1   3  -2   77.98    0.73
  -5  -1   2    4.94    0.39
   0  -2  -5    1.20    0.27
   0   2   5    0.47    0.45
   0   2  -5    0.29    0.30
   0  -1  -6 1138.39    4.33
  -5  -1   1   11.01    0.46
  -4   1   5  299.46    2.02
  -4  -1   5  304.63    2.06
  -2   3   2   75.90    1.40
   2   3  -2   77.63    1.49
  -2   3   2   80.49    0.60
  -4   2   3 1866.28    5.39
  -4  -2   3 1861.15    5.28
  -2   3  -1 2794.08    6.58
  -1   3   3 2011.85    7.84
   1   3  -3 1944.42    6.43
  -5  -1   3   95.76    1.13
  -5   0   4  289.90    2.05
  -3   1  -4   64.42    1.07
  -3  -1  -4   84.47    1.08
  -2  -1  -5  258.22    1.87
  -4   0  -3    0.29    0.35
   0   3  -3 3458.42    7.90
   0   3   3 2974.23   10.91
  -1   0  -6 3874.77   10.03
  -3   1   6 2051.59    6.54
  -3  -1   6 2212.65    7.07
  -2  -2  -4 2799.28    7.01
  -2   2  -4 2813.63    7.77
  -5  -1   0  116.96    1.28
  -4   2  -1 1798.11    8.72
  -4   2  -1 1767.88    5.13
  -5   0  -1    0.41    0.39
  -3   2  -3 6379.18   14.13
  -3   2  -3 6371.18   14.80
  -3  -2  -3 6198.58   14.02
  -3  -2  -3 6238.60   15.33
  -3  -2  -3 6103.04   13.38
  -3   2   5    2.24    0.35
  -3   2   5    1.78    0.29
  -3  -2   5    1.80    0.27
   2   3  -3 4058.95   11.34
  -2   3   3 3863.99   11.82
  -2   3   3 3821.32   11.70
  -2   3   3 3675.54    7.56
   2   3  -3 3461.83    9.70
  -1  -2  -5  385.66    2.30
  -1   2  -5  400.06    2.34
  -1   2  -5  395.16    2.59
  -1   2  -5  385.27    2.41
  -4   2   4 3003.85    7.86
   4   2  -4 2996.85    8.32
   4   2  -4 3006.06    7.96
   4   2  -4 2985.16    8.63
  -4  -2   4 3013.81    7.73
  -4   0   6 1328.47    5.17
   4   0  -6 1388.98    5.19
   5  -1  -4 1022.66    5.43
   5  -1  -4 1012.13    3.74
   5   1  -4 1010.16    3.98
  -5  -1   4 1028.01    4.04
   5   1  -4 1017.44    4.47
  -1   3  -3   47.01    0.68
   1   3   3   48.16    1.29
  -1   3  -3   48.32    0.87
   1   3   3   47.54    0.97
  -4  -1  -3 1418.81    4.93
  -4  -1  -3 1468.86    5.74
  -4  -1  -3 1396.44    5.12
  -4   1  -3 1418.46    5.03
  -4  -1  -3 1370.71    4.93
  -4   1  -3 1312.81    5.14
  -1   1  -6 1541.49    5.55
  -1  -1  -6 1534.29    5.06
  -1  -1  -6 1524.66    5.27
  -1  -1  -6 1537.19    7.02
   2   3   2  893.24    3.99
  -2   3  -2  910.03    4.14
  -2   3  -2  909.64    3.75
   2   3   2  895.87    6.57
  -2   3  -2  894.52    4.23
  -2   3  -2  905.15    3.30
   3   3  -1 1314.06    7.88
  -3   3   1 1264.80    6.70
  -3   3   1 1300.81    3.91
  -3   3   1 1324.46    5.23
   3   3  -1 1282.62    6.04
   2   0  -7   -0.13    0.37
   2   0  -7   -0.12    0.38
   1   0  -7    0.58    0.36
   1   0  -7    1.52    0.44
   1   0  -7    0.57    0.33
   5   1   1 3291.94   11.02
  -5  -1  -1 3288.98    8.82
  -3   3   0 3137.20    8.96
   3   3   0 3096.35    8.86
  -3   3   0 3153.99    7.76
  -3   3   0 3146.00    9.02
  -3   3   0 3074.67    7.52
  -3   3   2  358.58    3.36
   3   3  -2  374.53    3.14
  -3   3   2  378.24    2.78
  -3   3   2  372.70    2.31
  -3   3   2  347.90    1.73
  -3   3   2  378.84    2.62
   3   3  -2  355.95    2.51
   5   0  -5   -0.05    0.35
   5   0  -5    0.32    0.30
  -5   0   5    0.00    0.31
  -1   3   4  171.73    1.85
   1   3  -4  165.51    1.60
  -1   3   4  169.25    2.35
  -1   2   6  107.69    1.16
   1   2  -6  103.58    1.27
   1   2  -6  101.78    1.28
   1  -2  -6   99.88    2.11
  -1   2   6  105.52    1.65
  -4   2  -2   86.07    1.30
  -4  -2  -2   86.28    1.38
  -4   2  -2   86.49    2.02
  -4   2  -2   87.58    1.13
  -4  -2  -2   87.56    1.16
  -4   2  -2   91.19    1.23
  -4  -2  -2   89.55    1.01
  -4  -1   6 3977.05   10.40
   4  -1  -6 3886.84   13.67
   4   1  -6 3870.09   10.67
   4  -1  -6 3918.53    9.40
  -4   1   6 3990.62   10.28
   4   1  -6 3869.32    9.88
   0   3  -4  538.36    2.59
   0   3  -4  460.77    2.67
   0  -3  -4  499.36    4.07
   0   3  -4  482.25    2.92
   0   3   4  420.16    3.47
   0   3  -4  485.37    2.51
   0   3   4  500.31    3.19
  -2   2   6  133.18    1.60
   2   2  -6  126.68    1.45
   2  -2  -6  129.73    2.46
  -2   2   6  139.79    1.36
   2   2  -6  136.00    1.52
  -3   0  -5    0.34    0.29
  -3   0  -5   -0.06    0.35
  -3   0  -5   -0.05    0.38
   3   0  -7    0.10    0.35
   3   0  -7    0.16    0.30
  -3   0   7    0.11    0.37
   3   0  -7   -0.13    0.68
   5   0   2  154.46    1.74
  -5   0  -2  152.76    1.65
   0   0  -7    0.11    0.36
   0   0  -7    0.20    0.32
   0   0  -7    0.04    0.36
  -3   3  -1 4468.47   10.75
   3   3   1 4528.51   11.56
  -3   3  -1 4510.26   11.73
  -3  -3  -1 4459.82   10.76
  -3   3  -1 4478.65   10.29
  -3   3  -1 4433.39   11.93
   3   3   1 4508.15   16.53
  -3   3  -1 4508.49   12.41
   2   3  -4 1179.26    4.71
  -2   3   4 1155.79    3.29
  -2  -3   4 1190.24    3.86
  -2   3   4 1067.17    5.86
   2   3  -4 1099.46    4.48
  -2   3   4 1160.92    5.86
   2   3  -4 1187.58    4.85
  -2   3   4 1146.13    5.00
   2  -3  -4 1177.27    4.20
  -3   3   3   81.34    1.63
  -3   3   3   82.25    1.09
  -3   3   3   83.87    1.27
  -3   3   3   80.26    1.26
  -3   3   3   84.44    1.36
   3   3  -3   82.27    1.19
  -3   3   3   82.51    1.32
   2  -1  -7  273.38    2.20
  -2   1   7  259.81    2.08
   2   1  -7  259.47    2.12
   2  -1  -7  259.41    2.12
   2  -1  -7  271.45    3.47
   2   1  -7  265.49    2.07
   1   1  -7   66.34    1.09
   1   1  -7   72.53    1.06
   1  -1  -7   70.10    1.08
   1  -1  -7   67.47    1.08
   1  -1  -7   69.46    1.82
   1   1  -7   69.84    1.09
   1  -1  -7   63.44    1.05
  -2   0  -6  196.62    1.85
  -2   0  -6  192.50    1.77
  -2   0  -6  195.99    1.73
  -2   0  -6  192.32    1.80
  -5   2   2  269.30    1.75
  -5   2   2  271.84    2.34
   5   2  -2  257.98    2.00
   5   2  -2  278.27    2.29
  -5   2   2  254.21    1.94
   5  -2  -2  255.50    1.78
  -5  -2   2  263.84    1.89
   5   2  -2  271.16    2.17
  -5   2   2  263.69    2.56
  -5   2   2  267.65    3.21
   5   2  -2  267.85    3.16
   0   2   6    7.89    0.60
   0  -2  -6    8.78    0.40
   0   2  -6    8.90    0.49
   0   2  -6    7.70    0.46
   0   2  -6    9.76    0.52
   0  -2  -6    9.61    0.91
   0  -2  -6    8.70    0.47
   5   1  -5  840.59    4.45
  -5  -1   5  776.81    3.65
   5   1  -5  799.57    3.60
  -5   1   5  827.09    4.24
   5   1  -5  773.69    4.02
  -5   1   5  803.10    3.73
   5  -1  -5  811.55    5.15
   5   2  -1 1954.93    6.51
  -5  -2   1 1936.90    5.90
  -5   2   1 1930.85    5.66
  -5   2   1 1927.04    7.68
  -5   2   1 1997.73    6.33
   5   2  -1 1979.23    6.89
  -5   2   1 1949.90    6.85
   5   2  -1 1951.35    9.00
  -5   2   1 1911.66    9.39
   5  -2  -1 1943.81    5.63
   4  -2  -5 2174.93    6.30
   4  -2  -5 2171.23    9.60
  -4   2   5 2146.56    6.46
   4   2  -5 2223.87    7.40
  -4   2   5 2243.19    7.84
  -4  -2   5 2173.54    6.59
   4   2  -5 2192.88    7.24
  -4   0  -4 4871.04   12.19
  -4   0  -4 4884.61   11.67
   6   0  -2 4104.98   11.45
  -6   0   2 4012.02   10.62
   6   0  -2 4076.72    9.77
   6   0  -2 3978.66   10.91
  -2   3  -3 1221.08    5.07
  -2   3  -3 1226.02    5.13
  -2   3  -3 1221.99    7.20
  -2   3  -3 1200.39    4.26
  -2   3  -3 1206.07    4.63
   2   3   3 1202.82    7.77
  -2  -3  -3 1214.17    4.44
   2   3   3 1192.80    5.10
   2   3   3 1219.00    4.94
  -2  -3  -3 1250.59    6.01
   5   2  -3  618.12    3.31
   5   2  -3  636.24    4.81
  -5   2   3  634.21    4.02
   5   2  -3  655.69    3.60
   5  -2  -3  644.94    2.98
  -5   2   3  671.26    3.34
   5  -2  -3  637.06    4.14
   5   2  -3  651.09    3.57
  -5  -2   3  620.44    3.02
  -5   2   3  634.81    3.64
  -5   2   3  628.27    4.74
  -3  -2  -4 1110.50    4.07
  -3   2  -4 1107.22    6.64
  -3  -2  -4 1160.42    5.70
  -3   2  -4 1140.62    5.01
  -3  -2  -4 1142.68    4.46
  -3   2  -4 1090.06    3.90
  -3   2  -4 1117.85    4.46
  -3   2  -4 1123.61    4.78
  -3  -2  -4 1099.11    4.49
   3   2   4 1116.87    6.97
  -3   2  -4 1145.35    4.74
  -2   2  -5  933.79    3.48
  -2  -2  -5  998.11    4.08
  -2  -2  -5  976.77    5.47
  -2   2  -5  961.17    4.44
  -2   2  -5  958.09    4.50
  -2   2  -5  950.45    5.37
  -2  -2  -5  967.73    3.78
  -2  -2  -5  970.65    4.16
  -2   2  -5  931.36    4.14
   6   0  -1    0.62    0.44
  -6   0   1   -0.11    0.35
  -3   1  -5  948.92    4.29
  -3   1  -5  876.78    4.76
  -3  -1  -5  919.21    5.02
  -3   1  -5  900.54    4.29
  -3  -1  -5  905.40    4.05
  -3  -1  -5  946.94    4.57
  -3  -1  -5  928.54    4.07
  -3   1  -5  848.06    4.27
  -6   0   3    0.09    0.34
   6   0  -3    0.34    0.48
   6   0  -3    0.26    0.33
   6   0  -3    0.16    0.31
  -3   2   6 1187.46    5.58
   3  -2  -6 1185.96    4.10
   3   2  -6 1154.08    4.62
  -3   2   6 1216.50    4.49
  -3  -2   6 1107.11    4.67
  -3   2   6 1197.84    4.44
   3  -2  -6 1237.20    7.68
   3   2  -6 1165.65    4.93
   3  -1  -7 5344.87   13.33
   3   1  -7 5358.00   12.48
  -5  -1  -2  376.02    2.50
  -5   1  -2  362.61    3.49
  -5   1  -2  366.24    2.57
   5   1   2  379.20    3.46
  -5  -1  -2  375.06    2.52
  -5   1  -2  360.56    2.43
  -5  -1  -2  385.67    2.43
   0  -1  -7  255.41    3.20
   0  -1  -7  255.08    2.12
   0   1  -7  261.00    2.11
   0  -1  -7  260.51    2.11
   0   1  -7  258.88    2.10
  -1  -3  -4  395.10    2.36
  -1   3  -4  398.08    2.26
  -1  -3  -4  409.13    3.59
   1   3   4  391.64    3.57
   1   3   4  413.40    4.13
   1   3   4  425.44    2.96
  -1   3  -4  404.58    2.28
  -1   3  -4  414.08    2.81
  -1   3  -4  416.33    2.57
   5  -2   0    4.61    0.33
  -5   2   0    4.55    0.89
  -5   2   0    5.14    0.39
   5   2   0    4.44    0.51
  -5  -2   0    5.47    0.37
  -5   2   0    4.23    0.49
   5   2   0    5.49    0.46
  -2   1  -6  615.89    3.49
  -2   1  -6  642.07    3.57
  -2  -1  -6  652.10    3.33
  -2   1  -6  651.24    3.36
  -2  -1  -6  666.30    4.53
  -2   1  -6  661.03    3.56
  -2   1  -6  647.82    3.19
  -2  -1  -6  658.52    3.30
  -2  -1  -6  639.82    3.88
  -2  -1  -6  624.48    3.32
  -2  -1  -6  611.58    3.21
  -2   1  -6  677.79    3.74
   3   3   2   40.55    0.90
  -3  -3  -2   42.33    0.81
  -3   3  -2   43.31    0.78
  -3   3  -2   39.43    1.01
  -3  -3  -2   41.48    1.06
   3   3   2   39.92    0.92
   3   3   2   41.76    1.68
  -3   3  -2   39.75    1.56
  -3   3  -2   40.06    0.94
  -3   3   4 1188.03    3.81
   3   3  -4 1193.19    5.10
  -3   3   4 1179.76    6.19
  -3   3   4 1215.00    5.23
   3   3  -4 1191.74    5.03
   3   3  -4 1176.73    4.85
   3  -3  -4 1223.15    7.05
  -3   3   4 1125.41    5.40
  -3   3   4 1168.28    5.30
  -3   3   4 1168.40    5.10
  -3   3   4 1216.05    4.53
   3  -3  -4 1204.73    4.38
   5   0  -6  954.08    5.56
   5   0  -6  981.51    3.98
   5   0  -6  966.08    4.53
  -5   0   6  995.03    4.42
  -4  -1  -4  440.81    2.75
  -4   1  -4  414.03    2.24
  -4   1  -4  417.98    2.85
  -4   1  -4  399.40    3.45
  -4  -1  -4  443.32    2.83
  -4  -1  -4  439.32    3.19
   4   1   4  438.41    3.74
  -4   1  -4  426.78    2.78
  -4  -1  -4  421.14    2.76
  -4   1  -4  445.27    2.80
  -4   1  -4  423.07    2.86
  -4  -1  -4  434.72    2.69
   6   1  -2   16.95    0.74
   6   1  -2   18.89    0.61
   6  -1  -2   16.44    0.73
   6   1  -2   20.71    0.96
  -6  -1   2   17.99    0.62
  -6   1   2   17.12    0.64
   6  -1  -2   20.62    0.57
   4   0  -7    0.33    0.31
   4   0  -7    0.60    0.69
  -4   0   7    1.61    0.43
   4   0  -7   -0.16    0.33
   4   0  -7   -0.09    0.38
  -1   0  -7    0.45    0.38
  -1   0  -7    0.04    0.65
  -1   0  -7   -0.07    0.39
  -1   0  -7    0.11    0.33
  -1   0  -7    0.07    0.35
  -1   0  -7   -0.05    0.38
  -1   0  -7    0.23    0.29
  -6   0   0 5732.34   14.19
   6   0   0 5726.91   14.58
   6   0  -4  257.55    1.92
   6   0  -4  255.23    2.17
  -6   0   4  256.55    2.15
   6   0  -4  259.44    2.59
  -4   3   1  820.74    4.65
   4   3  -1  806.19    4.10
   4   3  -1  786.20    3.76
   4   3  -1  732.96    4.39
   4   3  -1  845.24    6.66
  -4   3   1  792.51    3.35
  -4   3   1  795.54    3.24
  -4   3   1  819.03    4.00
   4  -3  -1  800.71    3.50
  -4   3   1  775.82    5.73
  -5   2   4  883.12    3.83
   5   2  -4  888.45    4.39
  -5   2   4  845.15    4.68
   5   2  -4  880.86    4.14
   5   2  -4  886.95    3.80
  -5  -2   4  897.75    3.82
   5   2  -4  890.43    4.27
   5  -2  -4  871.24    3.67
   5  -2  -4  873.48    5.32
  -5   2   4  852.41    5.39
   5   2  -4  899.30    5.83
  -5   2   4  871.16    4.44
   1   3  -5  130.11    1.42
   1   3  -5  124.85    1.44
  -1   3   5  127.40    2.14
  -1   3   5  130.31    1.71
   1   3  -5  128.37    1.53
   1   3  -5  126.52    1.29
   1   3  -5  124.06    1.41
   1  -3  -5  129.03    1.21
  -1   3   5  127.90    0.92
   1  -3  -5  129.19    2.43
  -4   3   2  611.39    3.38
   4  -3  -2  557.21    2.93
  -4   3   2  621.79    4.01
  -4   3   2  587.26    4.76
  -4   3   2  585.05    2.77
   4   3  -2  602.40    3.37
   4   3  -2  569.34    3.50
   4   3  -2  578.56    3.99
   4   3  -2  603.92    3.54
  -4   3   2  590.02    2.67
   4   3  -2  605.26    5.50
   6  -1  -1 2977.42    9.09
  -6   1   1 2925.36    8.70
  -6   1   1 2925.74   11.23
   6   1  -1 2997.72    9.51
  -6  -1   1 2934.55    8.58
  -6   1   1 2872.27    9.82
   6  -1  -1 2915.79    7.56
  -4  -2  -3 1285.58    5.97
  -4   2  -3 1282.48    4.91
  -4   2  -3 1299.28    5.15
   4   2   3 1254.07    7.53
  -4  -2  -3 1253.64    4.94
  -4  -2  -3 1285.95    4.81
  -4   2  -3 1275.81    4.41
  -4   2  -3 1314.82    5.26
  -4   2  -3 1252.02    5.51
  -4  -2  -3 1309.41    4.65
  -6   1   3 1341.30    5.38
   6   1  -3 1344.55    5.61
   6   1  -3 1339.52    5.75
   6   1  -3 1340.61    4.97
  -6   1   3 1363.68    6.04
   6  -1  -3 1359.24    6.18
   6  -1  -3 1352.74    4.68
   6   1  -3 1341.75    5.27
  -1   2  -6  272.56    2.08
  -1   2  -6  270.69    2.20
  -1  -2  -6  270.53    3.20
  -1   2  -6  267.33    1.73
  -1  -2  -6  271.53    2.14
  -2   3   5   51.09    1.32
  -2   3   5   54.70    1.38
  -2   3   5   54.56    0.97
   2   3  -5   57.31    1.00
  -2  -3   5   51.48    0.84
   2  -3  -5   54.56    1.76
   2   3  -5   64.41    1.13
   2  -3  -5   55.64    0.85
   2   3  -5   57.52    1.01
  -2   3   5   54.72    0.67
   2   3  -5   57.96    1.09
  -2   3   5   64.86    1.22
  -4   3   0  475.36    3.00
  -4   3   0  474.40    2.49
   4   3   0  455.61    2.68
   4   3   0  466.54    3.05
   4   3   0  490.84    3.95
  -4   3   0  435.76    3.12
  -4   3   0  478.82    3.54
  -4   3   0  465.05    4.66
  -4   3   0  479.40    2.62
   4  -3   0  466.68    2.61
  -5   2  -1 1094.95    4.29
  -5   2  -1 1124.02    5.15
  -5   2  -1 1082.01    7.28
  -5  -2  -1 1150.64    4.39
  -5  -2  -1 1136.20    5.35
  -5   2  -1 1187.82    5.00
  -5   2  -1 1066.96    5.55
  -5   2  -1 1113.20    4.18
   5   2   1 1112.83    7.04
  -5  -2  -1 1109.92    4.69
  -5   0  -3   -0.06    0.41
  -5   0  -3    0.21    0.42
  -5   0  -3    0.26    0.31
  -5   0  -3   -0.03    0.46
   0   3  -5 1500.07    5.43
   0   3  -5 1496.68    5.81
   0   3  -5 1502.06    5.06
   0  -3  -5 1481.20    7.98
   0   3   5 1514.74    6.19
   0   3  -5 1494.92    5.70
   0   4   0    7.88    0.76
   0   4   0    8.83    0.43
   0   4   0    8.69    0.56
   0   4   0   10.02    0.63
   0   4   0    9.41    0.55
  -4   3   3  838.63    5.60
  -4   3   3  862.58    4.16
   4   3  -3  852.95    4.35
   4   3  -3  821.71    4.22
   4  -3  -3  848.93    3.67
   4   3  -3  872.68    6.64
   4   3  -3  874.68    4.96
   4   3  -3  847.68    4.19
  -4   3   3  825.98    3.34
   5  -1  -6   67.30    1.12
  -5   1   6   69.05    1.26
   5   1  -6   70.94    1.38
   5  -1  -6   72.65    1.76
  -5   1   6   60.95    1.06
  -5  -1   6   63.62    1.09
   5   1  -6   63.62    1.20
   5  -1  -6   66.06    0.99
   4   1  -7  221.21    1.87
   4   1  -7  236.99    1.95
   4  -1  -7  223.60    1.71
   4   1  -7  234.93    2.56
  -4  -1   7  233.00    2.14
   4   1  -7  222.70    2.14
   4  -1  -7  219.27    2.02
   0   4  -1  672.66    3.15
   0   4  -1  670.75    4.37
   0   4  -1  681.29    4.72
   0   4   1  677.90    3.58
   0   4   1  648.13    3.74
   0   4  -1  669.40    3.47
   0   4   1  672.95    3.02
   0   4   1  695.22    4.96
   0   4   1  681.43    4.60
   0   4  -1  669.71    3.65
   0   4  -1  690.99    3.96
  -1  -1  -7 1258.26    7.05
  -1  -1  -7 1310.47    5.70
  -1  -1  -7 1260.46    4.74
  -1   1  -7 1253.98    4.81
  -1   1  -7 1211.60    4.91
  -1   1  -7 1269.42    4.86
  -1  -1  -7 1268.50    5.09
  -1  -1  -7 1214.80    5.14
  -1   1  -7 1270.95    5.30
  -1  -1  -7 1269.38    5.12
  -6  -1   0  355.76    2.59
  -6   1   0  377.63    3.08
   6   1   0  383.12    2.96
  -6   1   0  361.43    3.67
   6  -1   0  377.30    2.79
   6   1   0  373.81    3.64
  -6   1   0  381.14    2.69
  -6  -1   4 2747.94    8.23
   6  -1  -4 2817.12    9.94
   6  -1  -4 2729.98    7.69
  -6   1   4 2791.07    9.30
   6   1  -4 2778.26    8.10
   6   1  -4 2765.73    8.61
   6   1  -4 2862.34    9.37
   6   1  -4 2774.54    8.92
   6   1  -4 2835.77   10.01
  -6   1   4 2756.46    8.61
   4   2  -6 3466.67    9.73
   4  -2  -6 3473.35    8.85
  -4   2   6 3398.62    9.12
   4  -2  -6 3493.28   13.46
   4   2  -6 3422.46   10.17
  -4  -2   6 3449.90    9.56
   1   4   0  165.68    1.77
   1   4   0  177.82    1.97
   1   4   0  159.15    2.52
  -1   4   0  175.96    2.02
  -1   4   0  172.03    1.67
  -1   4   0  178.01    1.76
   1   4   0  170.37    1.81
  -1   4   0  169.69    1.49
   1   4   0  167.90    2.16
  -1   4   0  164.53    2.44
   2   0  -8 5541.12   18.15
   2   0  -8 5513.64   14.16
   1   4  -1 3744.24   11.93
  -1   4   1 3739.91   11.17
  -1   4   1 3739.88   12.67
   1   4  -1 3764.46   13.27
  -1   4   1 3791.01   10.13
   1   4  -1 3789.77   13.22
   1   4  -1 3735.91   10.81
   1   4  -1 3745.08   10.42
  -1   4   1 3763.53    9.15
  -1   4   1 3817.12   10.57
  -1   4   1 3774.67   11.69
   1   4  -1 3676.39   10.35
  -2   3  -4  213.29    3.04
  -2  -3  -4  213.07    1.85
   2   3   4  207.43    3.31
  -2   3  -4  213.27    1.71
  -2   3  -4  204.73    1.90
  -2   3  -4  213.86    2.17
  -2  -3  -4  210.38    2.63
  -2   3  -4  205.76    2.13
  -2   3  -4  213.87    1.80
   2   3   4  207.21    2.13
  -6   0  -1   -0.08    0.45
   6   0   1   -0.03    0.43
  -6   0  -1    0.14    0.29
  -6   0  -1   -0.03    0.34
   1   0  -8  230.87    3.16
   1   0  -8  226.16    2.10
   1   0  -8  232.31    2.11
   2   2  -7 1159.99    5.02
   2  -2  -7 1186.23    7.98
   2   2  -7 1290.27    5.34
   2   2  -7 1215.91    4.78
   2  -2  -7 1202.09    4.94
  -2   2   7 1231.17    4.74
   2   2  -7 1240.62    4.84
   2   2  -7 1219.64    4.41
   2   2  -7 1214.14    5.00
  -2   2   7 1208.72    5.46
   1   2  -7  281.31    2.04
   1   2  -7  279.03    2.23
   1   2  -7  289.75    2.33
   1   2  -7  275.65    2.30
   1   2  -7  272.89    2.19
   1   2  -7  286.94    1.83
   1  -2  -7  275.27    3.69
  -1   2   7  290.53    2.85
   1  -2  -7  280.10    2.24
   6   0  -5    0.16    0.39
  -6   0   5    0.38    0.36
   6   0  -5    0.07    0.35
  -4   3  -1 4042.20   12.48
   4   3   1 4015.90   16.57
  -4  -3  -1 4021.89   11.78
  -4  -3  -1 4023.27   10.59
   4   3   1 4121.11   11.20
  -4   3  -1 4061.72   11.10
   4  -3   1 4033.48   10.02
  -4   3  -1 4095.68   11.71
  -4   3  -1 3997.40   15.40
  -4   3  -1 4031.86    9.95
  -4   3  -1 4030.50   10.30
  -4   3  -1 4029.09   10.30
  -5   1  -3 1000.41    5.82
  -5  -1  -3 1008.21    4.56
  -5   1  -3 1042.02    4.63
  -5  -1  -3 1021.98    4.53
  -5   1  -3 1002.96    4.76
   5   1   3 1014.77    6.11
  -5   1  -3 1005.79    4.59
  -5  -1  -3  997.85    4.42
  -5  -1  -3 1014.52    5.17
  -5   1  -3  980.85    4.70
  -1   4  -1  121.87    1.33
   1   4   1  124.22    1.91
   1   4   1  118.56    1.50
   1   4   1  122.75    1.68
   1   4   1  120.19    2.39
  -1   4  -1  117.57    1.66
  -1   4  -1  119.03    1.64
  -1   4  -1  117.86    1.37
  -1   4  -1  118.83    2.18
   1   4   1  121.08    1.55
  -1   4  -1  122.85    1.76
  -1   4  -1  124.47    1.50
  -3   3  -3  914.57    4.15
  -3  -3  -3  885.32    4.05
   3   3   3  970.87    5.98
   3   3   3  890.08    4.42
  -3   3  -3  886.21    6.66
  -3  -3  -3  931.30    5.32
  -3   3  -3  891.16    4.03
   3   3   3  935.79    4.39
  -3   3  -3  938.35    4.62
   5   2  -5   42.35    0.97
  -5   2   5   37.05    1.08
  -5   2   5   42.40    0.88
   5   2  -5   40.94    0.97
   5   2  -5   40.68    1.06
   5  -2  -5   40.34    1.40
  -5  -2   5   38.38    0.81
   3   3  -5 2048.79    7.03
   3  -3  -5 2141.35   10.58
  -3   3   5 2086.95    7.71
  -3   3   5 2087.60    7.35
  -3   3   5 2066.66    5.80
  -3   3   5 2012.87    8.64
   3   3  -5 2055.66    7.35
   3   3  -5 2050.82    7.22
  -3  -3   5 1986.81    6.07
   3  -3  -5 2059.55    6.26
  -3   0  -6  730.83    3.67
  -3   0  -6  743.39    3.97
  -3   0  -6  734.78    3.93
  -3   0  -6  740.12    4.59
   0   4  -2  158.65    1.63
   0   4  -2  150.96    1.95
   0   4  -2  151.35    1.51
   0   4  -2  153.72    1.98
   0   4   2  151.06    2.21
   0   4   2  155.17    2.36
   0   4  -2  160.24    1.91
   0   4  -2  152.53    2.30
  -1   4   2   20.23    1.00
  -1   4   2   16.65    0.68
   1   4  -2   17.21    0.68
  -1   4   2   17.17    1.08
   1   4  -2   17.37    0.96
  -1   4   2   17.70    0.83
   1   4  -2   17.83    0.73
  -1   4   2   18.96    0.64
   1   4  -2   17.04    0.87
   1   4  -2   18.33    0.71
  -1   4   2   17.33    0.79
   3   0  -8 1650.19    5.34
   3   0  -8 1662.32    6.39
   3   0  -8 1661.09    8.70
  -1  -3  -5   35.07    1.37
  -1   3  -5   34.52    0.78
  -1   3  -5   37.93    0.96
  -1   3  -5   36.28    0.79
  -1   3  -5   34.81    1.22
  -1  -3  -5   35.75    0.80
   1   3   5   38.06    1.31
   1   3   5   34.61    1.30
  -4   3   4   82.56    1.83
   4   3  -4   92.30    2.22
   4   3  -4   80.64    1.34
   4   3  -4   77.96    1.37
   4   3  -4   84.88    1.37
   4   3  -4   86.99    1.39
  -4   3   4   83.96    1.03
  -4   3   4   86.42    1.34
   4  -3  -4   92.75    1.91
  -4   0  -5    0.17    0.34
  -4   0  -5    0.23    0.31
  -4   0  -5   -0.07    0.39
  -4   0  -5   -0.04    0.38
  -4   0  -5    0.07    0.50
  -4   0  -5    1.21    0.43
  -3   2  -5  840.65    4.11
  -3  -2  -5  834.80    3.75
  -3  -2  -5  849.87    4.16
  -3  -2  -5  861.03    4.06
  -3  -2  -5  857.48    5.34
  -3   2  -5  833.40    4.46
  -3   2  -5  848.82    4.35
  -3   2  -5  852.63    5.45
  -3   2  -5  823.02    3.39
  -3   2  -5  837.50    4.23
   2  -1  -8  318.46    4.11
   2   1  -8  319.73    2.59
   2  -1  -8  323.11    2.58
  -2   1   8  309.49    2.48
   2   1  -8  324.45    2.35
   2  -1  -8  332.31    2.63
   2   1  -8  324.66    2.53
  -3   2   7  487.16    3.20
   3  -2  -7  477.20    2.95
   3   2  -7  470.82    3.17
   3   2  -7  495.61    2.87
   3  -2  -7  484.38    5.10
  -3   2   7  456.11    2.83
   3   2  -7  467.25    2.91
  -3  -2   7  507.69    3.31
  -3   2   7  478.41    3.64
   3  -2  -7  479.83    2.52
  -5  -2  -2 1180.89    4.64
  -5   2  -2 1193.13    7.66
  -5   2  -2 1157.18    5.40
  -5  -2  -2 1161.12    4.89
  -5  -2  -2 1144.98    5.74
  -5  -2  -2 1156.69    4.57
  -5   2  -2 1154.57    4.73
   5   2   2 1174.02    7.48
   0   2  -7 1118.20    4.52
   0   2  -7 1101.41    4.98
   0   2  -7 1109.80    4.94
   0   2  -7 1079.13    4.62
   0   2  -7 1095.51    5.00
   0  -2  -7 1098.12    4.81
   0   2  -7 1096.09    3.86
   0  -2  -7 1110.51    4.82
   0  -2  -7 1071.48    7.27
   0  -2  -7 1111.74    4.51
   0   2   7 1065.45    5.59
  -2   4   1    0.49    0.73
   2   4  -1    0.09    0.48
  -2   4   1    0.57    0.41
   2   4  -1    0.16    0.83
  -2   4   1    0.28    0.37
   2   4  -1    1.29    0.43
  -2   4   1    0.28    0.46
  -2   4   1    1.48    0.46
   2   4  -1    1.76    0.64
  -2   4   1    0.31    0.54
   2   4  -1    0.33    0.39
  -2   4   1    0.62    0.29
   6   1   1  818.13    4.68
  -6   1  -1  793.86    5.42
   6   1   1  836.05    5.54
  -6  -1  -1  828.74    4.12
   6  -1   1  831.15    4.27
  -6   1  -1  805.23    4.13
  -6  -1  -1  824.76    3.96
  -6  -1  -1  804.83    3.86
   1  -1  -8 2554.15    8.17
   1  -1  -8 2529.69   11.76
   1   1  -8 2548.68    7.86
   1  -1  -8 2547.06    8.27
   2   4   0    0.78    0.74
  -2   4   0    0.07    0.43
  -2   4   0    0.20    0.31
   2   4   0    0.11    0.41
   2   4   0    0.35    0.49
  -2   4   0    0.95    0.72
   2   4   0    0.09    0.39
  -2   4   0    0.30    0.40
   0   0  -8   47.07    0.82
   0   0  -8   47.27    1.56
   0   0  -8   49.80    1.04
   6   1  -5  760.58    4.80
  -6   1   5  741.11    4.06
  -6   1   5  747.29    4.38
   6   1  -5  725.96    3.73
  -6   1   5  709.05    3.87
   6   1  -5  765.80    4.54
   6  -1  -5  712.23    4.95
   6  -1  -5  723.03    3.46
  -6  -1   5  751.39    3.86
   6   1  -5  741.38    4.15
  -5   0   7    0.06    0.38
   5   0  -7    0.48    0.38
   5   0  -7   -0.18    0.44
   5   0  -7    0.34    0.68
  -2   0  -7    0.53    0.42
  -2   0  -7    0.00    0.43
  -2   0  -7    0.02    0.36
  -2   0  -7   -0.07    0.30
  -2   0  -7   -0.02    0.62
  -2   0  -7    0.08    0.36
  -2   2  -6  932.23    5.18
  -2   2  -6  965.14    4.59
  -2   2  -6  980.28    4.46
  -2  -2  -6 1010.62    4.26
  -2   2  -6  934.29    4.70
  -2   2  -6  927.41    3.59
  -2  -2  -6  981.03    4.34
  -2   2  -6  955.59    4.83
  -2  -2  -6  939.99    4.43
  -1   4  -2  666.93    3.77
  -1   4  -2  657.67    3.61
   1   4   2  645.09    5.36
   1   4   2  647.69    3.67
   1   4   2  654.42    5.50
  -1   4  -2  660.51    5.31
  -1   4  -2  664.92    3.81
   1   4   2  646.72    4.01
  -1   4  -2  682.66    3.29
   2   4  -2  178.23    1.92
  -2   4   2  181.78    2.08
  -2   4   2  185.93    1.96
  -2   4   2  188.86    2.08
   2   4  -2  186.90    1.94
  -2   4   2  187.57    2.15
   2   4  -2  185.48    2.86
   2   4  -2  188.07    2.67
  -2   4   2  179.83    2.37
   2   4  -2  184.62    1.97
  -3  -1  -6  314.41    2.46
  -3   1  -6  315.07    2.57
  -3   1  -6  315.24    2.28
  -3   1  -6  324.63    2.82
  -3   1  -6  308.49    2.56
  -3  -1  -6  331.04    3.31
  -3  -1  -6  315.06    2.77
  -3  -1  -6  317.76    2.43
  -3   1  -6  301.57    2.60
  -4   2  -4   22.31    1.17
  -4   2  -4   25.15    0.66
  -4   2  -4   24.68    0.78
   4   2   4   24.70    1.35
  -4   2  -4   24.37    0.86
  -4  -2  -4   26.63    0.69
  -4   2  -4   27.53    0.83
  -4   2  -4   25.72    0.79
  -4  -2  -4   24.59    1.01
  -4  -2  -4   25.23    0.76
  -4  -2  -4   26.36    0.74
   3  -1  -8  737.98    6.42
   3  -1  -8  711.50    3.97
   3   1  -8  728.84    4.88
   3   1  -8  723.01    3.79
   3  -1  -8  695.09    4.00
   3  -1  -8  709.19    3.11
   3   1  -8  695.92    3.43
  -3   1   8  687.33    3.83
   6   2  -2    0.81    0.51
   6   2  -2    1.04    0.40
  -6  -2   2    0.70    0.30
   6  -2  -2    3.37    0.51
  -6   2   2    1.07    0.85
   6   2  -2    1.71    0.51
  -6   2   2    1.64    0.38
   6   2  -2    1.24    0.83
  -6   2   2    1.33    0.43
   6  -2  -2    1.25    0.34
   6   2  -2    2.01    0.47
   1   3  -6   76.34    1.19
   1   3  -6   73.67    1.12
   1  -3  -6   74.20    2.05
   1   3  -6   75.74    1.18
   1   3  -6   75.50    1.25
   1   3  -6   72.34    1.13
   1   3  -6   70.89    1.04
   1   3  -6   76.74    1.20
  -1   3   6   73.02    1.71
  -1   3   6   75.92    1.39
  -2   4  -1   17.99    0.80
   2   4   1   16.42    0.67
  -2   4  -1   16.95    0.64
  -2   4  -1   17.55    0.67
  -2   4  -1   18.83    1.21
  -2   4  -1   18.09    0.72
   2   4   1   17.77    0.76
   2   4   1   16.86    0.75
  -2   4  -1   19.04    0.76
  -2   4  -1   17.59    0.58
   2   4   1   17.69    1.40
   2   4   1   15.22    1.12
  -1   4   3 2297.07    8.71
   1   4  -3 2339.52    8.28
   1   4  -3 2310.29    8.01
   1   4  -3 2334.05    9.02
  -1   4   3 2391.81    7.58
  -1   4   3 2394.50    8.50
   1   4  -3 2354.49    7.61
  -1   4   3 2438.94    8.38
  -4  -3  -2    5.35    0.47
  -4   3  -2    6.85    0.62
   4   3   2    7.17    0.47
  -4   3  -2    6.11    0.48
   4   3   2    6.30    1.18
  -4   3  -2    6.72    0.55
  -4   3  -2    6.64    0.45
  -4  -3  -2    5.92    0.64
  -4   3  -2    5.76    0.58
  -4   3  -2    5.50    0.40
   4   3   2    7.38    0.58
  -4   1  -5  416.45    3.04
  -4  -1  -5  452.02    2.97
  -4  -1  -5  437.91    3.64
  -4  -1  -5  408.37    2.87
  -4   1  -5  432.98    2.61
  -4   1  -5  439.61    3.03
  -4  -1  -5  443.35    2.98
  -4  -1  -5  422.63    3.18
  -4   1  -5  426.55    2.98
  -4   1  -5  419.13    3.07
  -6   2   1  649.03    4.52
   6   2  -1  625.69    4.01
   6   2  -1  617.51    3.53
   6  -2  -1  619.73    2.99
  -6  -2   1  569.05    3.26
  -6   2   1  545.02    3.60
  -6   2   1  619.71    5.53
  -6   2   1  625.25    3.59
  -2  -3   6  500.07    3.12
   2   3  -6  529.44    3.18
  -2   3   6  489.69    3.93
   2   3  -6  513.58    3.02
   2   3  -6  513.01    3.09
   2   3  -6  547.31    3.04
   2   3  -6  505.84    3.15
  -2   3   6  521.06    3.56
   2  -3  -6  524.58    5.30
   2   3  -6  519.97    3.30
   2  -3  -6  508.03    2.62
  -2   3   6  513.95    2.42
   0   4  -3 1238.31    5.62
   0   4  -3 1261.25    7.13
   0   4   3 1243.09    6.88
   0   4  -3 1248.57    5.57
   0   4  -3 1260.53    5.06
   0   4   3 1186.23    7.30
   0   4  -3 1233.61    4.88
   0   4  -3 1227.12    5.31
   0   4  -3 1219.97    4.80
   0   4   3 1275.31    6.66
  -6  -2   3   17.01    0.60
  -6   2   3   17.35    0.76
   6  -2  -3   16.35    0.59
   6   2  -3   18.34    1.17
   6   2  -3   17.47    0.76
  -6   2   3   16.68    1.15
   6   2  -3   16.48    0.75
   6   2  -3   16.94    0.70
   6  -2  -3   17.06    0.81
  -6   2   3   16.00    0.62
  -6   0  -2 1302.14    4.98
  -6   0  -2 1321.06    5.75
  -6   0  -2 1323.57    5.87
  -6   0  -2 1301.09    5.95
   4   0  -8 1611.42    5.55
   4   0  -8 1602.74    6.16
  -4   0   8 1616.83    6.59
   4   0  -8 1599.21    8.47
   6   0  -6  191.23    2.08
  -6   0   6  190.37    1.97
  -5   0  -4 2382.34    8.50
  -5   0  -4 2362.81    8.45
  -5   0  -4 2365.71    7.38
   0   1  -8 4733.00   12.51
   0   1  -8 4649.43   12.70
   0  -1  -8 4763.71   11.56
   0   1  -8 4646.47   11.73
   0  -1  -8 4640.36   12.56
   0  -1  -8 4764.58   12.53
   0  -1  -8 4722.32   16.75
   0   1  -8 4652.21   12.45
   0  -1  -8 4650.11   12.48
   5   1  -7 4857.68   13.60
  -5   1   7 4979.05   13.63
   5  -1  -7 4960.48   12.15
   5   1  -7 5064.71   14.57
   5   1  -7 4971.70   12.58
   5  -1  -7 4935.57   16.75
  -5   1   7 4945.83   12.88
  -5  -1   7 5127.72   13.07
   5  -1  -7 4991.48   13.06
  -2   1  -7    6.86    0.56
  -2  -1  -7    6.71    0.63
  -2  -1  -7    7.87    0.50
  -2   1  -7    6.80    0.52
  -2   1  -7    7.40    0.56
  -2  -1  -7    8.24    0.52
  -2  -1  -7    7.02    0.50
  -2   1  -7    7.44    0.55
  -2   1  -7    7.74    0.50
  -2  -1  -7    7.33    0.87
   5   3  -2    8.87    0.68
   5   3  -2    9.07    0.70
   5  -3  -2    8.96    0.53
  -5   3   2    9.32    0.47
  -5   3   2    8.98    0.63
  -5  -3   2    9.12    0.60
  -5   3   2    9.16    0.47
   5   3  -2   10.32    1.29
  -5   3   2    8.00    1.04
   5   3  -2    9.30    0.59
   0   3  -6  192.26    1.88
   0   3   6  197.40    2.81
   0   3   6  190.78    2.24
   0  -3  -6  193.42    1.84
   0  -3  -6  191.28    3.13
   0   3  -6  195.01    1.86
   0   3  -6  189.45    1.96
   0   3  -6  190.78    1.66
   0   3  -6  192.76    2.05
   5   3  -1 1366.07    5.42
   5   3  -1 1413.40    9.40
  -5   3   1 1266.18    4.90
  -5   3   1 1370.83    6.19
   5  -3  -1 1391.20    4.99
  -5   3   1 1381.70    5.20
  -5   3   1 1315.86    8.69
  -5  -3   1 1392.39    6.06
   5   3  -1 1474.76    7.24
   5   3  -1 1409.84    5.90
   4   3  -5 1276.81    5.67
  -4   3   5 1354.87    7.33
   4  -3  -5 1411.33    8.09
  -4   3   5 1370.19    4.74
   4  -3  -5 1382.29    5.07
  -4   3   5 1446.09    6.63
  -4   3   5 1347.22    5.77
   4   3  -5 1405.44    5.92
  -2   4   3  513.51    4.50
   2   4  -3  491.06    3.30
  -2   4   3  511.58    3.63
   2   4  -3  519.83    3.28
  -2   4   3  531.73    3.68
  -2   4   3  494.85    4.13
   2   4  -3  518.31    4.40
  -2   4   3  515.16    3.33
   2   4  -3  479.47    3.64
   2   4  -3  523.49    3.35
  -2   4   3  527.83    3.51
  -5   2   6  468.56    2.95
  -5  -2   6  472.14    2.93
   5  -2  -6  480.69    4.57
   5   2  -6  490.53    3.50
  -5   2   6  465.90    3.57
   5   2  -6  487.31    3.26
   5  -2  -6  461.88    2.78
   4   2  -7 2394.09    8.41
  -4   2   7 2411.36    7.54
   4  -2  -7 2400.02    7.02
   4  -2  -7 2412.39   11.55
  -4  -2   7 2420.85    7.92
  -1   2  -7 9853.25   21.97
  -1  -2  -7 9360.86   21.03
  -1  -2  -7 9567.01   21.30
  -1   2  -7 9540.69   20.91
  -1  -2  -7 9739.98   20.96
  -1   2  -7 9393.56   19.39
  -1   2  -7 9563.51   20.79
  -1  -2  -7 9565.97   20.81
   1   2   7 9627.98   23.78
  -1   2  -7 9555.27   21.22
  -6   2   0   14.70    0.87
  -6  -2   0   16.70    0.61
  -6   2   0   16.32    0.68
   6   2   0   14.95    1.21
  -6   2   0   14.98    0.73
   6   2  -4   87.32    2.05
   6   2  -4   84.38    1.46
  -6   2   4   84.58    1.45
  -6   2   4   83.01    1.62
   6   2  -4   85.72    1.48
  -6  -2   4   79.61    1.17
   6  -2  -4   84.67    1.69
  -6   2   4   87.01    1.35
   6  -2  -4   85.74    1.18
   6   2  -4   87.70    1.46
   6   2  -4   83.58    1.34
   7   0  -2  850.88    3.79
   7   0  -2  849.25    4.85
   5  -3  -3 2214.51    6.85
  -5   3   3 2194.78    8.88
   5   3  -3 2127.15    8.25
  -5   3   3 2100.33    6.78
   5   3  -3 2220.11    7.83
   5   3  -3 2276.71    7.73
  -5   3   3 2185.22   10.45
   5   3  -3 2223.81    7.97
   5   3  -3 2249.65    8.28
  -5   3   3 2180.54    6.37
   5   3  -3 2271.49   11.68
  -5   3   3 2228.19    8.33
   3   3   4   91.89    1.94
  -3  -3  -4   78.73    1.72
  -3  -3  -4   82.91    1.29
  -3   3  -4   83.33    1.33
   3   3   4   81.86    1.40
  -3   3  -4   84.55    1.27
  -3   3  -4   87.34    2.14
   3   3   4   84.75    2.41
  -3   3  -4   83.90    1.41
  -3   3  -4   84.36    1.13
  -2   3  -5  570.64    3.74
   2   3   5  551.19    5.32
   2   3   5  603.06    4.91
  -2  -3  -5  550.79    3.29
  -2   3  -5  561.07    2.90
   2   3   5  540.49    3.72
  -2   3  -5  554.35    3.64
  -2  -3  -5  555.71    4.63
  -2   3  -5  589.76    4.94
  -2   3  -5  559.00    3.34
  -2   3  -5  520.16    3.11
  -1   4  -3 1462.13    8.32
  -1   4  -3 1467.61    5.31
   1   4   3 1450.29    8.44
  -1   4  -3 1460.83    5.93
  -1   4  -3 1496.71    5.79
   1   4   3 1463.10    6.47
   1   4   3 1486.40    8.48
  -1   4  -3 1444.69    5.50
  -1   4  -3 1469.75    5.98
  -7   0   3    0.05    0.35
   7   0  -3    0.13    0.51
   7   0  -3    0.08    0.36
   7   0  -3    0.13    0.42
  -3  -3   6  600.17    3.33
   3   3  -6  654.01    3.77
   3   3  -6  653.00    3.74
   3  -3  -6  645.24    3.15
  -3   3   6  632.15    4.73
  -3   3   6  626.08    3.77
   3   3  -6  652.32    4.00
   3  -3  -6  689.51    6.19
  -3   3   6  644.85    2.96
  -3   3   6  660.42    4.10
  -2   4  -2  523.42    5.08
  -2   4  -2  520.99    3.45
  -2   4  -2  523.38    2.89
   2   4   2  528.64    5.57
  -2   4  -2  526.73    3.67
   2   4   2  515.49    3.53
  -2   4  -2  520.71    3.16
   2   4   2  520.95    3.19
   2   4   2  533.03    3.50
   3   4  -1   32.37    1.71
  -3   4   1   31.36    1.01
  -3   4   1   30.38    0.92
  -3   4   1   30.07    0.95
  -3   4   1   30.92    0.69
   3   4  -1   29.99    0.87
   3   4  -1   30.49    0.84
   3   4  -1   30.86    1.32
  -6   1  -2   96.44    1.47
  -6  -1  -2   98.81    1.39
  -6  -1  -2   95.90    1.38
  -6  -1  -2   98.97    1.44
  -6   1  -2  102.92    1.57
  -6   1  -2   99.75    1.92
  -6  -1  -2  100.00    1.71
   6   1   2   99.26    2.13
  -5   3   0   16.20    0.81
  -5   3   0   17.00    1.37
  -5   3   0   17.19    0.91
  -5   3   0   16.27    0.59
   5   3   0   16.81    1.57
  -5   3   0   18.74    0.64
  -5  -3   0   14.33    0.78
   5   3   0   14.82    0.75
  -5   3   0   15.16    0.64
   5  -3   0   19.35    0.62
  -1   0  -8   39.81    0.86
  -1   0  -8   40.91    1.50
  -1   0  -8   39.76    1.01
  -1   0  -8   40.37    1.04
  -1   0  -8   40.29    0.97
   4   1  -8  163.32    1.79
  -4   1   8  169.37    1.91
   4   1  -8  160.74    1.98
  -4  -1   8  161.39    1.96
   4   1  -8  156.66    1.68
   4   1  -8  153.06    2.19
   4  -1  -8  159.88    1.86
   4  -1  -8  159.24    1.52
  -6   1   6  126.48    1.64
  -6   1   6  119.08    1.76
   6   1  -6  122.47    1.76
   6  -1  -6  123.49    1.59
   6   1  -6  123.47    1.92
   6  -1  -6  127.64    2.21
  -6  -1   6  123.43    1.57
  -5  -1  -4    1.95    0.41
   5   1   4    2.03    0.77
  -5   1  -4    2.26    0.61
  -5   1  -4    2.33    0.45
  -5  -1  -4    1.83    0.44
  -5   1  -4    2.40    0.41
  -5   1  -4    3.95    0.51
  -5  -1  -4    2.17    0.42
  -5  -1  -4    2.70    0.61
  -5   1  -4    3.15    0.54
  -7   0   1    0.37    0.36
   7   0  -1    0.06    0.49
  -3   4   0  798.61    3.77
   3   4   0  769.32    4.12
  -3   4   0  773.00    3.51
  -3   4   0  782.45    4.48
  -3   4   0  779.28    6.20
  -3   4   0  790.05    4.76
  -3   4   0  770.89    4.49
   3   4   0  767.59    4.33
   3   4   0  814.98    6.07
   3   4   0  777.03    4.05
   3   4  -2   38.94    0.91
   3   4  -2   36.65    1.28
   3   4  -2   40.79    1.00
  -3   4   2   40.85    0.74
   3   4  -2   42.39    1.74
  -3   4   2   40.73    1.04
  -3   4   2   40.05    1.14
  -3   4   2   40.40    1.50
  -3   4   2   40.21    1.08
  -3   4   2   40.22    0.95
  -5  -2  -3    3.00    0.63
  -5   2  -3    2.93    0.49
  -5   2  -3    2.91    0.49
   5   2   3    3.11    0.88
  -5  -2  -3    3.40    0.38
  -5   2  -3    2.74    0.50
  -5   2  -3    4.56    0.86
  -5  -2  -3    2.90    0.45
  -5  -2  -3    2.76    0.40
  -5   2  -3    2.50    0.41
  -5   2  -3    2.55    0.40
  -1   4   4  274.89    3.20
  -1   4   4  281.37    2.74
  -1   4   4  281.48    2.83
  -1   4   4  283.71    2.37
  -1   4   4  282.45    3.55
   1   4  -4  286.10    2.36
   1   4  -4  277.49    2.52
   1   4  -4  278.82    2.48
   7   0  -4   40.84    1.19
   7   0  -4   39.94    0.90
  -7   0   4   37.79    0.98
   7   0  -4   36.83    0.99
   7  -1  -2  291.52    2.09
  -7   1   2  293.25    2.98
   7   1  -2  290.14    2.23
   7  -1  -2  290.83    2.71
   7   1  -2  289.23    2.85
   5  -3  -4  600.84    4.61
   5  -3  -4  579.12    3.20
  -5   3   4  593.73    4.30
   5   3  -4  590.04    3.87
  -5   3   4  584.50    3.13
  -5   3   4  590.57    4.03
   5   3  -4  600.50    3.91
   5   3  -4  582.76    3.72
   5   3  -4  602.32    5.81
  -5   3   4  570.11    5.03
   0   4  -4  832.58    4.04
   0   4  -4  846.98    4.19
   0   4  -4  833.32    4.52
   0   4  -4  824.17    4.29
   0   4   4  814.98    5.39
   0  -4  -4  842.47    6.23
   0   4   4  821.75    6.14
   7   1  -3  143.23    2.38
   7   1  -3  140.01    1.62
   7  -1  -3  140.91    1.98
  -7  -1   3  134.57    1.68
   7  -1  -3  138.99    1.49
  -7   1   3  145.36    2.13
   7   1  -3  134.78    1.94
  -7   1   3  137.59    1.75
   4   3   3  105.23    1.52
  -4   3  -3   99.49    2.52
  -4   3  -3  101.55    1.67
  -4   3  -3   95.91    1.41
  -4   3  -3   99.07    1.55
  -4  -3  -3  100.51    1.87
  -4  -3  -3   99.75    1.40
  -4   3  -3  101.59    1.41
   4   3   3   97.09    2.57
  -1   3  -6  131.17    1.65
  -1   3  -6  125.71    1.91
  -1  -3  -6  125.69    1.56
  -1   3  -6  124.06    1.34
   1   3   6  120.66    2.19
  -1  -3  -6  127.85    2.52
  -1   3  -6  121.30    1.53
  -1   3  -6  132.65    1.75
  -2   2   8  422.74    3.35
  -2   2   8  422.18    2.82
   2   2  -8  410.16    2.81
   2  -2  -8  405.20    4.99
   2  -2  -8  410.64    2.97
   2   2  -8  397.59    2.60
   2   2  -8  406.27    2.92
   2   2  -8  392.05    2.97
   2   2  -8  400.13    2.47
  -1  -1  -8   19.96    0.74
  -1  -1  -8   20.46    0.92
  -1  -1  -8   17.85    1.30
  -1   1  -8   19.44    0.81
  -1  -1  -8   20.26    0.78
  -1   1  -8   20.12    0.64
  -1  -1  -8   21.92    0.77
  -1   1  -8   19.94    0.75
  -1   1  -8   20.28    0.75
  -1   1  -8   20.04    0.79
  -3   4  -1   34.29    1.07
  -3   4  -1   36.16    1.65
   3   4   1   35.58    1.92
  -3   4  -1   32.64    1.00
  -3   4  -1   33.62    0.85
  -3   4  -1   33.07    0.78
   3   4   1   31.60    0.86
   3   4   1   28.18    1.23
  -3  -4  -1   29.81    0.74
   3   4   1   34.76    0.96
   3   4   1   35.62    1.03
  -3   4  -1   34.61    1.03
  -2   4   4  918.95    4.74
   2   4  -4  921.30    4.64
   2   4  -4  909.86    4.47
   2  -4  -4  917.89    4.18
   2   4  -4  918.67    5.41
  -2   4   4  922.93    4.69
  -2   4   4  931.24    5.05
  -2   4   4  919.12    5.16
  -2   4   4  912.22    6.08
  -3   4   3  374.18    3.10
  -3   4   3  372.98    4.05
  -3   4   3  366.70    2.70
   3   4  -3  376.04    4.30
  -3   4   3  373.12    3.05
   3   4  -3  359.18    2.97
   3   4  -3  360.43    2.63
  -3   4   3  363.25    3.22
   3   4  -3  360.58    2.86
   3   4  -3  346.52    3.36
  -6  -2  -1  278.98    2.30
  -6   2  -1  282.35    2.58
  -6   2  -1  265.39    3.69
  -6  -2  -1  269.00    2.35
  -6  -2  -1  255.95    2.75
   6   2   1  263.65    3.77
  -6   2  -1  267.59    2.60
  -6   2  -1  264.15    2.21
   1   2  -8   73.72    1.13
  -1   2   8   75.69    1.28
   1  -2  -8   70.35    1.28
   1   2  -8   69.99    1.25
   1   2  -8   74.75    1.31
   1   2  -8   78.94    1.31
   1   2  -8   70.38    1.30
  -6   2   5  181.19    2.16
   6   2  -5  176.20    2.01
   6   2  -5  187.08    2.17
  -6   2   5  182.89    2.37
   6  -2  -5  179.68    2.60
   6   2  -5  187.74    2.98
  -6  -2   5  181.75    1.88
   6   2  -5  180.34    2.17
   6   2  -5  196.55    2.23
  -6   2   5  184.62    1.95
   6  -2  -5  175.35    1.75
   5   3   1 1540.66    6.27
  -5   3  -1 1535.19    5.65
   5  -3   1 1514.30    5.21
  -5   3  -1 1529.38    5.93
  -5   3  -1 1494.35    9.55
  -5   3  -1 1553.28    6.81
  -5   3  -1 1493.94    6.13
  -5  -3  -1 1492.22    5.94
  -5   3  -1 1492.63    5.36
   5   3   1 1529.80   10.22
  -5   3  -1 1576.91    7.38
  -5  -3  -1 1512.90    6.97
  -7   1   1    0.95    0.48
   7   1  -1    0.61    0.53
   7  -1  -1    0.72    0.52
  -7   1   1    0.86    0.66
  -7  -1   1    1.30    0.37
  -7   0   0 1036.50    5.11
  -7   0   0 1029.98    4.47
   2   0  -9    1.11    0.49
   2   0  -9    0.21    0.92
   2   0  -9    0.18    0.44
   5   0  -8  217.24    3.01
   5   0  -8  218.72    2.35
  -6   0  -3    0.21    0.37
  -6   0  -3    0.24    0.49
   6   0   3    0.27    0.60
  -6   0  -3    0.78    0.42
  -6   0  -3    0.22    0.49
  -3   2  -6  227.01    2.75
  -3   2  -6  219.47    2.34
  -3  -2  -6  221.80    2.12
  -3  -2  -6  212.40    2.17
  -3   2  -6  216.39    1.71
  -3   2  -6  220.20    2.37
  -3   2  -6  212.46    2.28
  -3  -2  -6  219.20    2.00
   7   1  -4   10.20    0.69
   7   1  -4    9.48    0.64
  -7   1   4    8.97    0.70
   7   1  -4   10.43    0.60
   7   1  -4    8.68    0.68
   7  -1  -4    9.45    0.79
   7  -1  -4    9.30    0.54
   7   1  -4    8.97    0.84
  -7   1   4    9.22    0.60
  -7  -1   4    9.99    0.59
   3  -2  -8  220.76    2.19
   3   2  -8  215.97    2.27
  -3  -2   8  222.72    2.35
   3  -2  -8  216.21    3.76
  -3   2   8  209.23    2.03
  -3   2   8  202.47    2.21
   3   2  -8  223.14    2.10
   3   2  -8  211.72    2.02
   3  -2  -8  205.62    1.66
  -4   0  -6  653.32    3.94
  -4   0  -6  663.49    4.66
  -4   0  -6  659.83    4.06
  -4   0  -6  664.42    3.72
   6   0  -7    0.35    0.47
   6   0  -7    0.42    0.67
   6   0  -7    0.09    0.41
  -6   0   7    0.04    0.37
   1   0  -9    0.08    0.44
   1   0  -9   -0.12    0.43
   1   0  -9    0.31    0.45
   1   0  -9    0.52    0.84
  -3   0  -7    0.09    0.47
  -3   0  -7    0.54    0.64
  -3   0  -7   -0.10    0.39
  -3   0  -7    0.40    0.41
  -3   0  -7    0.13    0.43
  -3   0  -7    0.00    0.41
  -2   4  -3  475.69    3.47
  -2   4  -3  471.44    2.84
  -2   4  -3  481.85    5.09
   2   4   3  466.93    5.13
  -2   4  -3  482.68    3.13
  -2  -4  -3  487.24    4.28
   2   4   3  462.36    3.50
  -2   4  -3  492.54    3.46
   3   0  -9    0.24    0.41
   3   0  -9    0.52    0.87
   3   0  -9    0.14    0.46
   7   0  -5    0.16    0.59
   7   0  -5    0.27    0.44
  -7   0   5    0.10    0.36
   7   0  -5    0.13    0.42
   4   3  -6    2.59    0.51
   4   3  -6    2.51    0.56
   4   3  -6    2.48    0.62
  -4   3   6    2.65    0.75
   4  -3  -6    3.62    0.96
  -4   3   6    2.35    0.61
  -4   3   6    2.20    0.46
   4  -3  -6    2.34    0.43
  -4   3   6    3.04    0.31
  -4   2  -5   76.48    1.34
  -4  -2  -5   79.14    1.33
  -4   2  -5   76.68    1.34
  -4   2  -5   81.06    1.13
  -4   2  -5   80.70    1.41
   4   2   5   73.64    2.15
  -4   2  -5   81.38    1.85
  -4   2  -5   77.28    1.46
  -4  -2  -5   76.60    1.27
  -1   4  -4  143.01    1.83
  -1   4  -4  142.20    1.75
   1   4   4  143.24    2.75
  -1  -4  -4  148.06    2.61
  -1   4  -4  137.83    2.63
   1   4   4  146.58    2.03
  -1   4  -4  140.29    1.77
   1   4   4  141.80    2.62
   2  -3  -7   36.16    1.82
  -2   3   7   36.94    1.08
   2   3  -7   35.92    1.00
   2   3  -7   36.62    0.88
   2   3  -7   38.99    0.96
   2  -3  -7   37.01    0.74
   2   3  -7   39.19    0.89
   2   3  -7   38.56    0.91
  -2  -3   7   34.40    0.95
   2   3  -7   35.72    0.93
   1   3  -7  124.55    1.59
   1   3  -7  128.81    1.69
   1   3  -7  126.36    1.57
   1  -3  -7  125.67    2.87
   1   3  -7  131.16    1.59
   1   3  -7  125.27    1.64
  -1   3   7  124.58    2.23
   1  -3  -7  124.84    1.57
   1   3  -7  128.87    1.59
  -1   3   7  129.02    1.92
   1   3  -7  130.58    1.55
   1   3  -7  129.11    1.44
   0  -2  -8   38.29    0.94
   0   2  -8   38.53    1.05
   0  -2  -8   39.01    1.00
   0   2  -8   42.33    1.06
   0  -2  -8   40.57    1.00
   0   2  -8   38.65    0.97
  -5  -2   7  953.52    4.58
   5   2  -7  951.10    4.81
   5  -2  -7  928.26    6.99
   5  -2  -7  976.25    4.27
  -5   2   7  961.29    4.56
   5   2  -7  949.21    5.18
  -5   2   7  945.87    5.36
  -7  -1   0  368.22    2.76
   7   1   0  350.86    3.98
  -7  -1   0  365.89    2.92
  -7   1   0  359.23    3.67
   7   1   0  377.71    3.37
   7  -1   0  360.90    3.05
  -2  -2  -7 1044.04    4.74
  -2   2  -7 1044.65    4.96
  -2  -2  -7 1025.86    4.96
  -2   2  -7 1029.72    5.27
  -2   2  -7 1024.67    5.36
  -2   2  -7 1015.14    3.88
  -2   2  -7 1018.47    5.24
  -2   2  -7  994.35    5.10
   2   1  -9  502.74    3.23
   2  -1  -9  469.25    3.44
   2   1  -9  503.03    3.48
   2  -1  -9  498.90    5.52
  -2   1   9  517.46    3.73
   2  -1  -9  482.30    3.41
   2   1  -9  491.36    3.49
  -5   3   5  473.24    4.59
   5   3  -5  461.94    3.42
   5   3  -5  467.55    3.53
   5   3  -5  492.48    5.08
  -5   3   5  440.96    3.78
   5  -3  -5  481.21    4.46
  -5   3   5  449.17    3.57
   5   3  -5  475.55    3.52
  -5   3   5  467.33    2.89
  -3   4  -2   68.65    1.37
  -3   4  -2   70.30    2.24
  -3   4  -2   67.71    1.19
   3   4   2   67.00    1.30
  -3  -4  -2   68.92    1.62
   3   4   2   69.30    2.43
   3   4   2   67.09    1.36
  -3  -4  -2   65.94    1.11
  -3   4  -2   70.38    1.39
  -3   4  -2   64.77    1.09
  -5  -1   8 3736.66   11.23
   5  -1  -8 3780.08   11.21
   5   1  -8 3693.01   12.37
   5   1  -8 3749.65   10.59
   5  -1  -8 3747.32   10.10
  -5   1   8 3743.58   11.64
  -5   1   8 3810.63   11.06
   5   1  -8 3798.06   11.56
   3   4  -4  290.30    2.52
   3  -4  -4  282.15    2.25
   3   4  -4  268.09    2.52
   3   4  -4  297.17    2.73
  -3   4   4  315.90    2.96
  -3   4   4  290.30    2.82
  -3   4   4  290.21    2.76
  -3   4   4  278.99    3.50
  -3   4   4  292.55    2.99
   3   4  -4  287.13    3.41
   3   4  -4  290.06    2.66
   3   4  -4  292.30    2.33
  -6   1  -3  404.04    3.25
  -6   1  -3  416.63    3.91
  -6  -1  -3  403.61    2.95
  -6   1  -3  446.43    3.26
  -6  -1  -3  418.22    2.98
   6   1   3  423.54    4.39
  -6  -1  -3  407.89    3.09
  -6   1  -3  423.26    3.16
  -6  -1  -3  426.07    3.64
  -5   0  -5   -0.04    0.41
  -5   0  -5    0.13    0.54
  -5   0  -5    0.36    0.50
  -5   0  -5    0.40    0.40
  -4  -1  -6    0.42    0.69
  -4   1  -6    0.09    0.42
  -4  -1  -6    0.90    0.46
  -4  -1  -6    0.12    0.51
  -4   1  -6    0.39    0.36
  -4   1  -6    0.09    0.51
  -4   1  -6    0.84    0.54
  -4  -1  -6   -0.05    0.45
  -4  -1  -6   -0.16    0.34
  -4   1  -6    0.48    0.46
  -4   1  -6    0.01    0.41
  -6   1   7    2.67    0.52
   6   1  -7    2.18    0.63
   6  -1  -7    2.47    0.80
  -6  -1   7    2.77    0.40
   6   1  -7    2.76    0.54
   6  -1  -7    2.34    0.46
   6  -1  -7    2.51    0.47
  -6   1   7    2.38    0.43
   1   1  -9   71.29    1.38
   1  -1  -9   65.16    1.28
   1  -1  -9   69.97    1.35
   1  -1  -9   71.01    1.36
   1  -1  -9   70.11    2.18
   1   1  -9   68.47    1.29
  -3   1  -7 1232.50    5.75
  -3  -1  -7 1250.10    5.64
  -3   1  -7 1245.01    5.26
  -3   1  -7 1235.63    5.92
  -3  -1  -7 1240.10    7.30
  -3  -1  -7 1264.16    6.30
  -3   1  -7 1194.67    5.67
  -3   1  -7 1205.73    5.78
  -3   1  -7 1254.71    5.67
   3   1  -9   89.42    1.42
   3   1  -9   91.73    1.30
  -3   1   9   95.38    1.50
   3  -1  -9   81.74    1.47
   3   1  -9   91.91    1.88
   3   1  -9   85.73    1.23
   3  -1  -9   88.63    2.46
  -3  -1   9   97.35    1.69
  -4   4   1   44.90    0.88
   4  -4  -1   45.46    1.00
  -4   4   1   43.04    1.12
   4   4  -1   44.45    2.12
   4   4  -1   46.50    1.55
  -4   4   1   43.43    1.26
   4   4  -1   42.71    1.18
   4   4  -1   43.24    1.05
  -4   4   1   46.70    1.84
  -4   4   1   40.95    1.12
  -7   1   5  280.07    2.86
   7  -1  -5  291.23    2.30
  -7   1   5  285.29    2.61
   7   1  -5  295.93    2.48
   7   1  -5  287.87    3.33
   7   1  -5  272.37    2.70
  -7  -1   5  280.18    2.52
   7   1  -5  288.01    2.88
   7  -1  -5  282.10    3.06
   7   1  -5  287.83    2.65
  -2   0  -8  613.08    5.12
  -2   0  -8  609.48    3.78
  -2   0  -8  613.37    3.87
  -2   0  -8  631.06    3.58
  -2   0  -8  593.78    3.93
  -2   0  -8  598.17    3.95
  -7   0  -1    0.39    0.45
  -7   0  -1    0.46    0.46
  -7   0  -1    0.19    0.35
   7   0   1   -0.10    0.53
  -1   4   5 2291.60    8.79
   1  -4  -5 2275.21    6.98
   1   4  -5 2233.01    7.89
  -1   4   5 2271.34    8.60
   1   4  -5 2304.22    8.20
   1   4  -5 2257.17    7.37
  -1   4   5 2272.44    7.83
   1   4  -5 2275.64    7.57
   1  -4  -5 2300.76   11.65
  -1   4   5 2295.46   10.02
   4  -4  -2  405.13    2.77
   4   4  -2  390.73    4.05
  -4   4   2  395.96    2.41
   4   4  -2  403.63    3.27
  -4   4   2  395.54    3.32
   4   4  -2  404.09    5.26
  -4   4   2  389.32    4.54
  -4   4   2  394.74    3.65
   4   4  -2  388.68    3.03
  -4   4   2  398.79    3.19
   0   0  -9    0.15    0.40
   0   0  -9    0.12    0.47
   0   0  -9    0.46    0.85
   0   0  -9    0.12    0.45
   0   0  -9    0.29    0.29
   3   3   5  174.86    2.74
   3   3   5  173.20    3.31
  -3   3  -5  171.81    2.78
  -3   3  -5  175.16    2.14
  -3  -3  -5  167.81    1.89
  -3   3  -5  159.41    1.90
  -3   3  -5  170.10    1.93
  -3   3  -5  168.02    1.64
   3   3   5  182.55    2.21
  -3  -3  -5  171.71    2.72
   3   3  -7   24.13    0.88
  -3   3   7   22.63    0.86
   3  -3  -7   22.07    1.65
   3   3  -7   23.25    0.71
   3   3  -7   23.47    0.92
  -3   3   7   23.18    1.13
   3  -3  -7   23.07    0.66
   3   3  -7   24.57    0.86
  -3  -3   7   21.58    0.69
  -5   3  -2  200.30    2.05
  -5   3  -2  208.09    2.42
  -5   3  -2  201.48    3.58
  -5   3  -2  202.22    2.01
  -5   3  -2  202.17    1.85
  -5   3  -2  204.85    2.15
  -5  -3  -2  198.02    2.05
   5   3   2  201.14    2.15
   5   3   2  204.42    3.94
   0   3   7  136.33    2.49
   0  -3  -7  143.60    1.72
   0  -3  -7  127.32    2.82
   0   3  -7  136.06    1.69
   0   3  -7  149.77    1.61
   0   3  -7  133.12    1.80
   0   3   7  136.39    2.03
   0   3  -7  134.46    1.70
   0   3  -7  126.81    1.80
  -6  -2  -2  929.32    5.63
  -6  -2  -2  935.61    4.28
   6   2   2  926.06    7.23
  -6   2  -2  938.82    5.12
  -6   2  -2  930.09    4.54
   4   0  -9    0.20    0.85
   4   0  -9    1.44    0.45
   4   0  -9    0.26    0.46
  -4   0   9    0.20    0.41
   4   0  -9    0.64    0.34
   4   2  -8  614.07    4.04
   4   2  -8  612.39    3.67
   4  -2  -8  609.48    3.17
  -4   2   8  586.09    3.51
   4  -2  -8  638.60    6.10
  -4  -2   8  611.35    3.85
   4   2  -8  620.20    3.40
   4  -2  -8  611.55    3.66
  -6  -2   6 1304.31    5.55
   6   2  -6 1357.30    6.26
  -6   2   6 1296.50    5.58
   6  -2  -6 1321.27    7.53
   6   2  -6 1331.83    5.97
   6   2  -6 1280.63    6.23
  -6   2   6 1274.21    6.17
  -6   2   6 1269.26    6.52
   6   2  -6 1298.41    5.90
  -5  -2  -4   34.09    0.87
   5   2   4   28.84    0.86
  -5  -2  -4   34.59    0.94
  -5   2  -4   33.93    1.03
  -5   2  -4   31.68    1.37
  -5   2  -4   33.39    0.95
  -5   2  -4   33.75    0.81
   5   2   4   33.26    1.63
  -5   2  -4   33.46    0.98
  -5   2  -4   35.60    0.97
  -5  -2  -4   30.76    1.21
   2  -4  -5  140.37    2.87
  -2   4   5  133.21    2.06
  -2   4   5  138.84    1.86
   2   4  -5  136.74    1.74
   2  -4  -5  137.88    1.55
   2   4  -5  135.93    1.80
   2   4  -5  132.62    1.77
  -2   4   5  141.40    2.51
  -2   4   5  139.61    1.76
  -2   4   5  131.63    1.93
   4   4   0  793.57    4.23
  -4   4   0  794.33    3.85
  -4  -4   0  774.62    3.96
  -4   4   0  787.27    4.82
  -4   4   0  779.77    4.55
   4   4   0  782.69    5.87
  -4   4   0  792.42    3.72
  -4   4   0  785.16    5.10
   4  -4   0  794.99    3.96
   4   4   0  782.77    4.58
   2   3   6 1137.89    6.01
  -2  -3  -6 1138.60    5.20
  -2   3  -6 1153.11    4.52
  -2  -3  -6 1137.05    7.41
  -2   3  -6 1155.21    6.47
  -2   3  -6 1155.95    5.24
  -2   3  -6 1161.75    5.80
  -2   3  -6 1169.57    5.74
   0   4  -5   79.70    1.50
   0   4  -5   83.77    1.26
   0  -4  -5   81.14    2.24
   0   4   5   81.19    1.72
   0   4  -5   85.46    1.38
   0  -4  -5   85.16    1.14
   0   4  -5   82.83    1.39
   0   4   5   83.74    2.12
   0   4   5   82.41    1.57
   4   4  -3   22.78    0.89
  -4   4   3   19.91    0.88
   4   4  -3   18.77    0.98
   4  -4  -3   21.12    0.76
  -4   4   3   19.95    1.34
  -4   4   3   19.45    1.01
  -4   4   3   20.06    0.85
   4   4  -3   18.71    1.45
  -7   0   6   33.23    0.96
   7   0  -6   34.48    1.02
   7   0  -6   35.00    0.95
  -5   1  -5   43.65    1.02
  -5   1  -5   43.10    1.25
  -5  -1  -5   44.01    1.36
   5   1   5   42.33    1.56
  -5   1  -5   40.49    1.11
  -5  -1  -5   39.72    1.01
  -5   1  -5   39.72    1.07
  -5  -1  -5   39.42    1.03
  -5   1  -5   40.11    0.88
  -5  -1  -5   40.19    1.03
  -4   3  -4   14.45    0.65
  -4   3  -4   13.26    0.62
  -4   3  -4   11.94    1.26
  -4   3  -4   31.23    0.98
  -4   3  -4   27.52    0.89
  -4   3  -4   12.90    0.80
  -4  -3  -4   12.66    0.95
   4   3   4   11.73    1.46
  -4  -3  -4   13.42    0.68
   4   3   4   11.90    0.66
   6  -3  -2  273.58    2.18
  -6   3   2  260.90    3.10
  -6   3   2  265.26    4.04
   6   3  -2  272.34    2.64
  -6   3   2  269.01    2.35
   6   3  -2  272.30    2.51
  -6   3   2  263.60    2.76
   6   3  -2  279.90    4.42
  -6  -3   2  255.81    2.62
  -2   1  -8  311.02    2.86
  -2   1  -8  307.71    2.84
  -2  -1  -8  315.61    3.11
  -2   1  -8  304.43    2.82
  -2   1  -8  309.30    2.71
  -2  -1  -8  312.50    2.54
  -2  -1  -8  301.95    2.72
  -2  -1  -8  307.22    2.66
  -2   1  -8  309.10    2.56
  -2  -1  -8  313.19    3.93
  -2   1  -8  306.95    2.60
  -7  -2   2 1602.56    6.26
   7  -2  -2 1539.59    5.58
   7   2  -2 1556.54    6.10
  -7   2   2 1518.00    9.13
   7   2  -2 1603.18    7.19
   7   2  -2 1540.27    6.30
  -7   2   2 1517.08    6.71
   7   2  -2 1555.95    9.52
  -7   2   2 1553.90    7.71
   7  -2  -2 1578.69    6.76
  -7   1  -1  188.70    2.28
  -7  -1  -1  180.52    1.94
  -7  -1  -1  182.93    2.14
   7  -1   1  182.22    2.19
  -7   1  -1  180.52    2.55
   7   1   1  181.21    3.00
   0  -1  -9 2106.89   11.28
   0   1  -9 2140.67    7.98
   0   1  -9 2056.24    7.03
   0   1  -9 2084.71    7.85
   0  -1  -9 2023.62    7.80
   0   1  -9 2034.62    8.14
   0   1  -9 2190.88    8.22
   0  -1  -9 2020.44    7.85
   0  -1  -9 2067.98    7.66
  -7   2   3  867.45    5.53
   7   2  -3  854.99    4.49
   7   2  -3  901.77    5.19
   7  -2  -3  861.25    5.09
   7  -2  -3  823.62    3.97
   7   2  -3  817.13    5.15
   7   2  -3  860.03    4.67
  -7  -2   3  858.46    4.37
  -7   2   3  843.55    4.88
   7   2  -3  870.41    6.93
  -7   2   3  781.77    4.46
  -7   2   3  841.52    6.65
   6   3  -1 2623.20   14.25
  -6   3   1 2707.95    8.02
   6   3  -1 2732.80    9.24
  -6   3   1 2651.58    9.74
  -6   3   1 2600.70   13.31
  -6  -3   1 2585.17    9.66
   6   3  -1 2708.15    8.66
  -6   3   1 2482.16   10.58
   6   3  -1 2892.30   11.35
  -6   3   1 2766.52    8.80
   6  -3  -1 2714.38    8.04
   6   3  -3  518.67    3.72
   6  -3  -3  497.55    3.09
   6   3  -3  513.17    3.72
  -6   3   3  509.11    4.29
  -6   3   3  513.31    3.84
  -6   3   3  504.78    5.41
   6   3  -3  528.54    5.93
   6   3  -3  523.13    3.63
  -6   3   3  519.51    3.27
  -2  -4  -4    3.75    0.42
  -2   4  -4    3.90    0.57
  -2  -4  -4    3.98    0.88
   2   4   4    3.15    1.09
  -2   4  -4    3.52    0.59
   2   4   4    3.55    0.77
  -2   4  -4    3.43    0.55
  -2   4  -4    3.46    0.98
   2   4   4    3.20    0.54
  -1   2  -8 1163.84    5.67
  -1  -2  -8 1155.77    5.26
  -1   2  -8 1161.91    5.15
  -1  -2  -8 1163.44    5.53
  -1   2  -8 1177.89    5.25
   4   1  -9  157.07    1.77
   4  -1  -9  145.21    1.96
   4  -1  -9  158.90    1.60
  -4   1   9  155.63    1.96
   4   1  -9  168.22    2.41
   4  -1  -9  165.52    3.16
   4   1  -9  167.63    1.95
  -4  -1   9  152.48    2.01
   4   1  -9  150.64    2.04
  -4  -4  -1    1.65    0.43
  -4   4  -1    1.71    0.44
  -4  -4  -1    1.55    0.62
  -4   4  -1    1.62    0.54
   4   4   1    1.91    0.62
   4   4   1    1.76    0.77
   4   4   1    1.79    0.43
  -4   4  -1    1.85    0.45
  -4   4  -1    1.51    0.57
   4   4   1    1.95    1.43
  -4   4  -1    1.66    0.53
   4  -4   1    1.30    0.49
  -7   2   1  253.08    3.70
   7  -2  -1  258.92    2.02
   7   2  -1  252.28    2.86
  -7   2   1  258.24    3.04
  -7   2   1  257.48    2.53
  -7   2   1  258.23    2.65
  -3   4  -3  211.36    2.48
  -3   4  -3  205.52    3.63
   3   4   3  207.66    3.26
  -3   4  -3  205.14    2.12
  -3  -4  -3  211.79    2.05
  -3   4  -3  206.41    2.39
  -3   4  -3  210.41    1.93
  -3  -4  -3  202.83    2.86
  -3   4   5   38.64    1.24
   3   4  -5   38.81    0.96
  -3   4   5   37.91    1.12
   3   4  -5   40.94    1.16
   3   4  -5   38.68    0.92
  -3   4   5   39.44    1.15
  -3   4   5   38.91    1.13
  -3   4   5   36.90    1.46
   3  -4  -5   40.18    1.64
   3  -4  -5   38.15    0.90
  -5   3   6  268.55    2.24
  -5   3   6  242.29    3.29
   5  -3  -6  255.55    3.61
   5   3  -6  216.59    2.45
  -5   3   6  248.23    2.92
   5  -3  -6  240.10    2.15
  -5   3   6  242.46    2.71
   5   3  -6  245.15    2.63
   7   1  -6   80.12    1.39
   7   1  -6   79.00    1.51
   7   1  -6   79.99    1.63
   7  -1  -6   85.08    1.32
  -7   1   6   80.50    1.58
  -7   1   6   80.85    1.49
   7  -1  -6   74.93    1.80
   7   1  -6   78.09    1.52
  -7  -1   6   82.31    1.43
  -7   1   6   79.56    1.41
  -6   0  -4 2261.47    9.00
  -6   0  -4 2289.03    8.59
  -6   0  -4 2276.17    8.56
   6   0   4 2276.08   10.07
  -7   2   4  518.93    4.31
  -7   2   4  521.25    3.84
   7   2  -4  518.69    5.32
  -7   2   4  505.99    3.46
   7  -2  -4  507.32    3.12
   7   2  -4  519.07    3.53
   7   2  -4  529.20    3.91
  -7  -2   4  520.96    3.44
   7  -2  -4  521.30    4.15
   7   2  -4  522.23    3.65
   7   2  -4  515.01    4.04
   6   0  -8  170.01    2.18
   6   0  -8  172.94    1.93
   6   0  -8  171.23    2.62
  -6   0   8  173.33    2.04
   4   3  -7  240.05    2.52
   4  -3  -7  242.38    2.05
   4   3  -7  251.33    2.70
  -4   3   7  254.44    2.90
  -4   3   7  241.57    2.03
   4   3  -7  253.80    2.57
  -4   3   7  237.39    3.13
  -4   3   7  243.19    2.46
   4  -3  -7  243.95    3.78
   4   3  -7  253.24    2.11
  -1   4  -5   12.18    0.67
  -1   4  -5   10.13    0.67
  -1  -4  -5   10.77    1.16
   1   4   5   12.41    1.00
  -1   4  -5   11.27    0.70
  -1   4  -5   10.18    0.59
  -1   4  -5    9.77    0.97
   1   4   5    8.65    1.08
   1   4   5   12.00    0.79
   1   3   7  101.21    2.15
  -1   3  -7  108.04    1.72
  -1  -3  -7  100.44    2.56
  -1   3  -7  106.67    1.29
  -1   3  -7  108.16    1.59
  -1  -3  -7  109.15    1.59
  -1   3  -7  113.96    1.65
   6   3   0 1939.11    7.42
  -6  -3   0 1822.69    8.08
  -6   3   0 1949.84    7.31
   6  -3   0 1852.85    6.26
  -6   3   0 1890.04   11.29
  -6   3   0 1832.43    7.87
  -6  -3   0 1927.24    7.26
  -6   3   0 1895.08    6.49
   6   3   0 1915.68   12.20
   4   4  -4   11.05    0.66
   4   4  -4   11.71    1.20
  -4   4   4   11.34    0.76
  -4   4   4   11.20    1.13
  -4   4   4   11.34    0.83
   4   4  -4   11.12    0.74
  -4   4   4   10.30    0.72
  -6   3   4 1270.97    7.01
   6   3  -4 1246.58    5.94
   6   3  -4 1271.68    5.89
  -6   3   4 1306.92    8.63
   6   3  -4 1259.08    6.16
   6   3  -4 1286.20    6.51
  -6   3   4 1261.59    6.42
  -6   3   4 1317.00    5.51
   6  -3  -4 1281.25    5.24
   6   3  -4 1291.10    9.08
   6  -3  -4 1268.04    6.60
  -7   0  -2  842.79    5.15
  -7   0  -2  838.59    4.86
   7   0   2  849.51    5.95
  -7   0  -2  812.16    4.77
  -7   0  -2  808.18    4.07
  -1   0  -9    0.17    0.52
  -1   0  -9    0.03    0.32
  -1   0  -9    0.09    0.48
  -1   0  -9    0.09    0.42
  -1   0  -9    0.02    0.89
  -1   0  -9    0.11    0.46
  -7  -2   0  117.40    2.01
  -7   2   0  125.53    2.68
   7   2   0  123.01    2.88
  -7   2   0  122.92    1.85
  -7   2   0  121.50    1.79
  -5   0   9    1.83    0.47
   5   0  -9    0.40    0.80
   5   0  -9    1.01    0.51
   5   0  -9    0.87    0.44
   2   2  -9  220.56    2.35
  -2  -2   9  199.27    2.37
   2   2  -9  213.63    2.10
   2   2  -9  211.15    2.27
  -2   2   9  210.08    2.16
   2  -2  -9  217.73    2.34
  -2   2   9  227.50    2.59
  -5   3  -3  119.51    1.71
  -5   3  -3  117.26    1.72
  -5   3  -3  114.88    1.62
  -5  -3  -3  118.07    2.18
  -5   3  -3  117.92    1.93
  -5  -3  -3  115.33    1.66
   5   3   3  116.38    3.09
   0   5   0   -0.03    0.62
   0   5   0   -0.26    0.81
   0   5   0    0.08    0.36
   0   5   0   -0.15    0.61
  -5   2   8  921.82    4.62
  -5   2   8  964.67    5.65
   5   2  -8  965.35    4.94
   5  -2  -8  940.62    4.31
   5  -2  -8  968.28    7.37
  -5  -2   8  943.86    4.90
  -6  -2  -3    5.00    0.49
  -6  -2  -3    5.52    0.80
  -6   2  -3    5.43    0.54
  -6   2  -3    5.28    0.95
  -6   2  -3    4.94    0.58
  -6   2  -3    4.97    0.61
  -6   1  -4 3650.22   11.19
  -6  -1  -4 3653.87   11.35
  -6   1  -4 3602.72   11.64
  -6  -1  -4 3583.53   10.91
  -6   1  -4 3668.43   12.44
   6   1   4 3651.26   14.68
  -6   1  -4 3625.49   11.22
  -6  -1  -4 3603.08   10.94
  -6  -1  -4 3533.48   12.37
  -4   2  -6  143.88    2.26
  -4   2  -6  146.11    1.96
  -4   2  -6  142.59    1.49
  -4   2  -6  144.78    2.06
  -4  -2  -6  142.38    1.91
  -4  -2  -6  145.02    1.83
  -4   2  -6  144.38    1.92
  -4   2  -6  141.43    1.94
   6  -2  -7  461.14    3.06
  -6   2   7  485.09    3.41
  -6  -2   7  463.37    3.28
  -6   2   7  465.07    3.89
   6   2  -7  475.57    3.79
   6   2  -7  470.23    3.47
   6  -2  -7  452.92    4.68
   1   2  -9 2156.89    8.17
   1   2  -9 2078.27    7.65
   1   2  -9 2019.29    7.72
   1   2  -9 2020.63    6.90
   1  -2  -9 1999.73    7.91
   1   2  -9 1990.32    7.98
  -1   2   9 2190.37    8.21
  -3   2  -7  209.91    2.50
  -3  -2  -7  200.08    2.23
  -3   2  -7  194.34    2.27
  -3   2  -7  207.30    2.37
  -3   2  -7  201.28    2.40
  -3   2  -7  203.35    1.73
  -3  -2  -7  205.00    2.16
   6   1  -8   27.07    1.06
  -6  -1   8   25.96    0.87
  -6   1   8   26.01    0.86
   6  -1  -8   27.80    0.84
   6   1  -8   29.17    1.11
   6   1  -8   25.58    0.91
  -6   1   8   28.92    1.01
   6  -1  -8   26.74    0.94
   0   5   1   23.73    1.14
   0   5  -1   22.11    0.83
   0   5  -1   26.32    1.09
   0   5  -1   21.01    1.25
   0   5  -1   23.14    0.99
   0   5  -1   21.18    0.74
   0   5   1   23.17    1.02
   0   5   1   23.17    1.24
   0   5  -1   21.80    1.01
  -8   0   3    0.60    0.42
   8   0  -3   -0.29    0.41
   8   0  -3   -0.32    0.62
   1   4  -6    1.11    0.52
   1   4  -6    1.02    0.46
   1   4  -6    0.80    0.39
  -1   4   6    0.81    0.64
   1  -4  -6    0.63    1.07
  -1   4   6    0.44    0.76
   1   4  -6    1.02    0.50
   1   4  -6    0.44    0.50
  -1   4   6    0.80    0.48
   1  -4  -6    0.69    0.33
   1   4  -6    0.93    0.45
  -1   4   6    1.54    0.84
  -1   4   6    0.78    0.43
   3   2  -9  492.29    3.35
   3  -2  -9  493.05    5.97
  -3   2   9  523.59    3.49
   3   2  -9  496.27    3.71
   3  -2  -9  514.36    3.59
  -3   2   9  477.96    3.64
   3   2  -9  509.39    3.11
  -3  -2   9  545.32    4.02
   3   2  -9  507.32    3.25
   7  -2  -5    6.21    0.80
  -7  -2   5    5.06    0.49
   7   2  -5    5.51    0.70
   7   2  -5    7.69    1.12
   7   2  -5    6.91    0.73
  -7   2   5    5.78    0.51
  -7   2   5    5.55    0.64
   7   2  -5    5.96    0.68
   7  -2  -5    7.17    0.55
   7   2  -5    7.38    0.67
  -7   2   5    5.06    0.73
   4   4   2    8.90    0.74
  -4   4  -2    7.12    1.35
  -4   4  -2    6.18    0.58
   4   4   2    6.80    0.58
   4  -4   2    6.72    0.57
  -4  -4  -2    7.70    0.85
   4   4   2    8.37    1.59
  -4   4  -2    7.17    0.65
  -4   4  -2    7.94    0.71
   4   4   2    5.62    0.85
  -4  -4  -2    6.01    0.51
  -4   4  -2    6.87    0.58
  -8   0   2 2168.56    8.29
   8   0  -2 2149.92    8.92
   8   0  -2 2161.42    7.11
  -1   5   0  446.37    4.73
   1   5   0  429.93    3.43
  -1   5   0  411.31    3.58
   1   5   0  424.97    4.21
   1   5   0  435.66    3.59
   1   5   0  450.98    3.40
   1   5   0  420.59    4.54
   1   5   0  441.00    2.86
  -1   5   0  433.28    3.85
  -7   0   7    0.19    0.42
   7   0  -7   -0.03    0.50
   7   0  -7    1.41    0.68
   7   0  -7   -0.01    0.52
   2   4  -6    6.73    0.59
  -2   4   6    6.98    0.61
   2   4  -6    6.67    0.57
   2  -4  -6    7.33    1.29
   2   4  -6    6.42    0.65
  -2   4   6    6.84    0.90
  -2   4   6    6.99    0.55
   2  -4  -6    8.67    0.54
  -2   4   6    4.92    0.69
   2   4  -6    7.20    0.64
  -2   4   6    7.29    0.74
  -7  -1  -2  382.28    3.17
  -7   1  -2  371.21    3.68
   7   1   2  367.95    4.33
  -7  -1  -2  382.86    2.87
  -7   1  -2  379.09    3.19
  -7  -1  -2  389.48    3.63
  -7  -1  -2  380.97    2.95
  -7   1  -2  385.59    3.34
  -4   0  -7    0.29    0.53
  -4   0  -7   -0.02    0.39
  -4   0  -7    0.33    0.48
  -4   0  -7    0.34    0.43
  -4   0  -7    0.25    0.64
   2  -3  -8  511.31    6.00
   2   3  -8  538.08    3.61
   2   3  -8  515.85    3.20
   2   3  -8  540.50    3.61
  -2   3   8  538.39    4.03
   2   3  -8  546.54    3.50
   2   3  -8  534.72    3.03
   2   3  -8  546.43    3.54
   2   3  -8  519.23    3.32
   1   5  -1 1327.88    6.40
   1   5  -1 1277.11    5.34
   1   5  -1 1254.90    7.41
  -1   5   1 1334.96    8.26
   1   5  -1 1307.78    6.24
   1   5  -1 1335.23    7.33
  -1   5   1 1310.95    6.61
   1   5  -1 1300.63    7.48
   1   5  -1 1334.08    5.95
  -1   5   1 1317.94    4.97
  -1   5   1 1241.99    7.28
  -1   5   1 1350.89    6.66
  -1   1  -9   90.27    1.60
  -1   1  -9   95.88    1.32
  -1  -1  -9   97.69    1.62
  -1  -1  -9   91.29    1.52
  -1  -1  -9   95.48    1.61
  -1   1  -9   97.83    1.70
  -1   1  -9   90.75    1.49
  -1  -1  -9   88.12    2.43
  -1  -1  -9   93.27    1.37
  -1   1  -9   96.16    1.59
   6   3   1 2031.80    7.66
   6   3   1 2051.87   12.78
  -6   3  -1 2066.31   11.82
  -6   3  -1 2073.65    7.78
  -6  -3  -1 2005.88    7.63
  -6  -3  -1 1936.15    8.69
  -6   3  -1 2038.48    6.96
  -6   3  -1 1984.82    7.03
  -6   3  -1 2073.94    8.44
   1   3  -8   38.28    0.83
   1   3  -8   38.40    1.04
   1   3  -8   41.32    1.10
   1   3  -8   38.82    0.98
  -1   3   8   36.47    1.20
   1   3  -8   38.40    0.96
   1  -3  -8   35.22    1.93
   1   3  -8   39.76    1.05
   1  -3  -8   38.41    0.99
   6   3  -5   93.35    1.71
   6   3  -5   92.97    1.74
  -6   3   5   93.48    1.40
   6  -3  -5   98.08    2.03
   6   3  -5   94.53    1.53
   6   3  -5   98.19    1.68
   6  -3  -5   94.18    1.41
  -6   3   5   98.72    1.79
  -6   3   5   95.01    2.36
   6   3  -5   93.82    2.54
  -6   3   5   98.39    1.95
   2   0 -10   62.45    1.39
   2   0 -10   66.35    2.05
   2   0 -10   63.42    1.34
   8   0  -4   20.26    1.11
   8   0  -4   18.38    0.96
   8   0  -4   19.09    0.76
  -8   0   4   18.23    0.75
   8   0  -4   18.86    0.88
  -5  -1   9 3020.93   10.17
  -5   1   9 2959.30    9.84
   5   1  -9 3032.29   10.43
   5  -1  -9 3057.95   10.16
  -5   1   9 3026.73   10.58
   5   1  -9 2937.32    9.39
   5   1  -9 2970.41   10.98
   5  -1  -9 2990.83   13.43
   5  -1  -9 2909.57    8.89
  -1   5  -1  676.33    5.97
  -1   5  -1  782.32    4.13
   1   5   1  692.58    3.54
   1   5   1  693.54    5.72
  -1   5  -1  703.42    4.35
   1   5   1  705.35    4.63
   1   5   1  682.35    5.36
  -1   5  -1  697.46    4.02
   1   5   1  612.58    5.68
   5   4  -2    0.63    0.52
  -5   4   2    0.68    0.52
   5   4  -2    0.70    0.69
   5   4  -2    0.35    1.30
  -5   4   2    0.56    0.67
  -5   4   2    0.14    0.43
  -5   4   2    0.73    1.21
   5   4  -2    1.21    0.63
  -3   0  -8  249.81    3.32
  -3   0  -8  243.54    2.49
  -3   0  -8  255.13    2.68
  -3   0  -8  244.46    2.63
  -3   0  -8  253.68    2.48
  -3   0  -8  249.52    2.40
   0   4   6  193.03    3.19
   0   4   6  186.60    2.40
   0   4  -6  197.48    2.31
   0   4   6  185.97    2.45
   0   4  -6  196.21    2.16
   0   4  -6  201.96    1.96
   0   4  -6  202.11    2.19
   0  -4  -6  187.18    3.46
   0   4  -6  192.83    2.08
   5   4  -1    0.89    0.61
  -5   4   1    0.70    0.51
  -5   4   1    0.72    1.15
  -5  -4   1    0.92    0.46
   5   4  -1    0.50    1.42
   5   4  -1    0.48    0.62
   5  -4  -1    0.59    0.46
   5   4  -1    0.68    0.48
  -5   4   1    1.64    0.72
  -5   4   1    1.07    0.41
   8   0  -1    0.10    0.56
  -8   0   1    0.34    0.43
  -8   0   1    0.26    0.39
   3   0 -10  207.92    3.33
   3   0 -10  212.05    2.44
   4   4  -5   72.32    1.39
  -4   4   5   71.21    1.70
   4   4  -5   71.83    1.81
  -4   4   5   74.25    1.56
   4   4  -5   72.65    1.47
   4   4  -5   75.52    1.57
  -4   4   5   69.37    2.05
   4  -4  -5   71.71    1.24
  -5   0  -6 2888.34   11.04
  -5   0  -6 2857.90    9.24
  -5   0  -6 2832.09    9.72
  -5   0  -6 2836.50   10.05
  -5   0  -6 2888.69    9.95
  -3   3  -6   63.82    1.29
  -3   3  -6   61.01    1.06
  -3   3  -6   56.94    1.39
  -3  -3  -6   61.07    1.26
  -3   3  -6   64.99    1.35
   3   3   6   59.08    1.79
  -3  -3  -6   61.14    1.97
  -3   3  -6   62.99    1.70
  -3   3  -6   61.79    1.39
   3   3   6   52.90    1.36
   0   5   2   27.85    1.42
   0   5   2   29.89    1.36
   0   5  -2   29.89    0.87
   0   5  -2   29.84    1.42
   0   5  -2   31.97    1.10
   0   5   2   30.55    1.28
   0   5  -2   31.94    1.07
   5   2   5 1297.51    5.93
  -5   2  -5 1248.07    6.28
  -5  -2  -5 1237.93    5.81
   5   2   5 1228.31    8.99
  -5  -2  -5 1209.83    5.49
  -5   2  -5 1256.11    5.90
  -5   2  -5 1280.37    5.98
  -5   2  -5 1254.90    6.28
   1   5  -2  607.59    3.57
   1   5  -2  627.19    4.78
  -1   5   2  615.17    4.45
  -1   5   2  624.40    5.53
   1   5  -2  608.33    4.18
   1   5  -2  618.56    4.14
  -1   5   2  608.70    4.38
   1   5  -2  613.75    3.89
   3   3  -8   23.41    0.89
   3  -3  -8   25.58    0.68
   3   3  -8   28.24    0.93
   3   3  -8   25.78    0.75
   3   3  -8   26.60    0.79
   3   3  -8   27.97    1.02
  -3   3   8   25.36    1.18
   3  -3  -8   28.03    1.87
  -3   3   8   27.62    1.00
  -8  -1   3  760.06    4.58
   8   1  -3  738.96    4.91
   8  -1  -3  776.72    3.96
   8   1  -3  761.60    4.12
  -8   1   3  776.84    5.08
   8  -1  -3  796.26    4.98
   8   1  -3  814.13    6.33
   1   0 -10   21.29    0.94
   1   0 -10   19.98    1.47
   1   0 -10   18.51    0.88
   1   0 -10   21.25    0.89
  -2   2  -8   41.36    1.23
  -2  -2  -8   40.40    1.81
  -2   2  -8   43.61    1.06
  -2   2  -8   41.86    1.18
  -2  -2  -8   44.24    1.17
  -2   2  -8   46.91    1.21
  -2   2  -8   43.90    1.00
  -2   2  -8   43.88    1.13
   5   4  -3  169.87    3.61
  -5   4   3  161.69    2.07
   5  -4  -3  163.46    1.84
   5   4  -3  169.80    2.30
  -5   4   3  162.67    2.52
   5   4  -3  156.22    2.07
  -5   4   3  156.57    3.17
   8   1  -2   27.73    0.83
   8  -1  -2   26.01    0.77
  -8  -1   2   26.11    0.92
   8  -1  -2   26.75    1.02
   8   1  -2   29.36    1.45
   8   1  -2   26.17    1.09
  -7   2  -1  108.92    2.50
  -7   2  -1  109.32    1.77
  -7   2  -1  103.70    1.72
   7   2   1  110.39    2.88
  -7  -2  -1  115.62    2.08
  -4   3  -5 1009.41    6.97
  -4   3  -5 1042.85    5.79
  -4  -3  -5 1024.21    6.92
  -4   3  -5 1004.89    5.43
   4   3   5 1009.03    8.41
  -4  -3  -5 1041.37    5.23
  -4   3  -5 1017.59    5.14
  -4   3  -5 1018.93    4.45
   4   3   5 1029.73    5.38
  -4   3  -5  991.77    5.16
   7  -1  -7  331.59    3.68
   7   1  -7  337.08    3.21
  -7   1   7  327.61    3.03
  -7  -1   7  340.96    3.01
   7   1  -7  344.22    2.88
  -7   1   7  347.44    3.04
   7  -1  -7  346.60    2.94
  -7   1   7  334.99    3.21
   7   1  -7  334.76    3.31
   0  -2  -9  541.85    3.75
   0   2  -9  537.26    3.80
   0   2  -9  521.72    3.80
   0   2  -9  514.14    3.53
   0   2  -9  521.51    3.89
   0  -2  -9  544.06    3.68
   0  -2  -9  526.97    5.92
   0   2  -9  532.15    3.37
   3   4   4   53.39    1.82
  -3   4  -4   60.74    1.41
   3   4   4   54.75    1.33
  -3  -4  -4   54.90    1.13
  -3   4  -4   54.87    1.24
   3   4   4   56.11    2.15
  -3   4  -4   57.13    2.01
  -3   4  -4   56.71    1.38
  -3  -4  -4   52.90    1.72
   2   4   5 1405.94    8.77
  -2   4  -5 1450.87    8.62
  -2   4  -5 1438.19    6.86
  -2   4  -5 1473.33    6.78
   2   4   5 1440.33    6.82
  -2  -4  -5 1402.98    8.73
  -2   4  -5 1446.29    5.58
  -2   4  -5 1486.02    6.33
  -2  -4  -5 1426.71    5.90
  -3   4   6    6.56    0.63
  -3   4   6    4.62    0.62
   3  -4  -6    4.31    1.15
   3   4  -6    4.94    0.46
   3   4  -6    4.17    0.68
   3   4  -6    6.02    0.54
  -3   4   6    5.06    0.69
  -3   4   6    5.07    0.65
   3   4  -6    5.09    0.67
   3  -4  -6    5.71    0.52
  -3   4   6    6.74    0.97
  -4   1  -7 1348.08    5.63
  -4  -1  -7 1316.73    6.22
  -4  -1  -7 1372.48    6.18
  -4  -1  -7 1378.43    8.06
  -4   1  -7 1333.80    6.35
  -4  -1  -7 1303.95    6.02
  -4   1  -7 1331.76    6.28
  -4   1  -7 1351.13    6.58
  -4   1  -7 1366.27    6.31
   2   5  -1  207.04    3.25
   2   5  -1  209.92    2.38
   2   5  -1  207.57    2.40
  -2   5   1  219.01    3.53
  -2   5   1  213.87    1.87
   2   5  -1  215.35    2.40
  -2   5   1  210.67    2.39
  -2   5   1  213.44    2.47
  -2   5   1  211.07    2.29
   2   5  -1  209.98    3.25
  -2   5   1  204.16    2.56
  -5  -4   0 2043.13    7.45
  -5  -4   0 2093.96    8.84
  -5   4   0 2071.00    6.89
  -5   4   0 2129.28    9.37
   5   4   0 2064.42   10.40
   5   4   0 2020.66    8.19
   5   4   0 2029.06    7.44
  -5   4   0 2045.02   12.33
   5  -4   0 2073.49    6.99
  -5   4   0 2081.59    7.99
  -4  -2   9  211.92    2.41
   4  -2  -9  229.06    3.90
  -4   2   9  214.20    2.22
   4  -2  -9  217.07    1.89
   4  -2  -9  218.19    2.35
   4   2  -9  224.37    2.17
   4   2  -9  216.60    2.49
   4   2  -9  211.59    2.22
   2   5   0 1783.59    7.54
  -2   5   0 1851.13   10.50
  -2   5   0 1827.84    6.84
   2   5   0 1771.27    7.51
   2   5   0 1798.50    8.53
  -2   5   0 1813.90    6.24
  -2   5   0 1805.01    8.03
   2   5   0 1780.02   10.23
   2   5   0 1786.05    7.35
  -2   5   0 1804.99    7.27
   0   3  -8    0.42    0.36
   0  -3  -8    0.13    0.45
   0   3  -8    0.53    0.50
   0   3   8    0.28    0.66
   0  -3  -8    0.50    1.21
   0   3  -8    0.71    0.39
   2  -1 -10  506.61    5.90
   2   1 -10  505.16    3.47
   2  -1 -10  496.83    3.76
   2   1 -10  487.97    3.68
   2   1 -10  487.80    3.57
   2  -1 -10  494.58    3.69
   8   1  -4  131.32    2.11
  -8  -1   4  127.12    1.76
   8  -1  -4  131.11    1.69
   8  -1  -4  142.23    2.22
   8   1  -4  137.37    1.81
  -8   1   4  147.68    2.24
   8   1  -4  142.45    2.68
   5   3  -7    5.23    0.73
   5  -3  -7    4.97    0.53
  -5   3   7    5.45    0.73
   5   3  -7    5.42    0.67
  -5   3   7    5.03    0.74
   5  -3  -7    5.46    1.05
   8   0  -5    0.08    0.49
  -8   0   5    0.13    0.43
   8   0  -5   -0.01    0.67
   8   0  -5   -0.37    0.64
   8   0  -5   -0.15    0.51
  -2   3  -7 1758.05    7.52
   2   3   7 1655.13    8.91
  -2   3  -7 1750.64    7.58
  -2   3  -7 1759.55    5.93
  -2  -3  -7 1764.59    7.09
   2   3   7 1770.72    7.99
  -2  -3  -7 1719.71   10.21
  -2   3  -7 1856.73    7.48
  -1   5  -2   82.26    1.46
  -1   5  -2   84.21    1.50
  -1   5  -2   81.75    2.30
   1   5   2   82.35    2.10
   1   5   2   80.81    1.67
   1   5   2   85.59    1.99
  -1   5  -2   82.78    1.40
  -3   1  -8  159.07    2.17
  -3  -1  -8  149.44    1.89
  -3   1  -8  147.93    2.07
  -3  -1  -8  151.31    1.89
  -3  -1  -8  159.78    2.10
  -3   1  -8  159.18    2.01
  -3   1  -8  155.84    1.90
  -3  -1  -8  161.78    2.91
  -3   1  -8  152.40    2.10
  -8  -1   1  317.85    2.92
   8   1  -1  299.62    3.22
   8  -1  -1  297.34    3.04
  -8  -1   1  317.27    2.74
  -8   1   1  313.19    3.27
   3   1 -10  144.13    1.93
  -3  -1  10  151.94    2.23
   3  -1 -10  140.15    3.14
  -3   1  10  158.02    2.12
   3   1 -10  156.11    1.92
   3  -1 -10  151.57    2.09
   2   5  -2    0.39    0.62
   2   5  -2    0.86    0.55
  -2   5   2    0.03    0.52
  -2   5   2    0.17    0.46
  -2   5   2    0.12    0.61
   2   5  -2    0.82    0.75
  -2   5   2    0.33    0.95
  -2   5   2    0.13    0.56
   2   5  -2    0.20    0.60
   2   5  -2    0.44    0.62
  -2   5   2    0.38    0.54
  -5  -1  -6  123.71    1.82
  -5   1  -6  123.17    1.82
  -5  -1  -6  130.79    2.42
  -5  -1  -6  129.06    1.82
  -5   1  -6  125.15    1.80
  -5   1  -6  123.68    1.94
  -5  -1  -6  120.00    1.77
  -5   1  -6  129.05    1.62
   7   2  -6   41.65    1.25
   7  -2  -6   43.39    1.04
  -7  -2   6   41.54    1.04
  -7   2   6   46.84    1.13
  -7   2   6   46.49    1.39
  -7   2   6   43.24    1.24
   7   2  -6   41.48    1.19
   7   2  -6   44.57    1.22
   7  -2  -6   41.83    1.45
   7   2  -6   44.70    1.30
  -7   0  -3    0.07    0.48
   7   0   3    2.89    0.93
  -7   0  -3    0.33    0.38
  -7   0  -3    0.19    0.46
  -7   0  -3    2.40    0.66
   4   0 -10  350.80    2.55
   4   0 -10  352.76    4.23
   8   0   0   35.51    1.20
  -8   0   0   28.09    0.98
   8   0   0   33.35    1.47
  -8   0   0   28.85    0.83
   1  -1 -10 1083.78    5.75
  -1   1  10 1057.20    5.80
   1  -1 -10 1122.62    5.72
   1   1 -10 1111.60    5.57
   1   1 -10 1086.86    5.69
   1  -1 -10 1113.25    8.62
   2   5   1 1779.91    7.43
  -2   5  -1 1779.50    6.47
   2   5   1 1835.85   10.30
  -2   5  -1 1806.71    7.92
  -2   5  -1 1754.03    7.18
  -2   5  -1 1804.54   10.88
   2   5   1 1795.21    8.71
   2   5   1 1828.52    7.71
  -2   5  -1 1823.13    6.93
  -1   5   3 1601.19    7.46
   1   5  -3 1619.09    7.33
   1   5  -3 1670.06    7.16
  -1   5   3 1529.80    8.65
   1   5  -3 1577.32    6.29
  -1   5   3 1645.00    9.27
   1   5  -3 1639.45    6.67
  -1   5   3 1668.64    7.19
  -1   5   3 1693.87    7.73
   5   4  -4  466.98    3.63
   5  -4  -4  462.15    3.11
   5   4  -4  470.60    3.82
  -5   4   4  467.15    3.52
  -5   4   4  467.73    5.26
   5   4  -4  480.47    5.55
  -2   0  -9    0.05    0.40
  -2   0  -9    0.12    0.61
  -2   0  -9   -0.13    0.52
  -2   0  -9   -0.03    0.87
  -2   0  -9    0.19    0.44
  -2   0  -9    0.12    0.48
  -4   4  -3  443.64    3.64
   4   4   3  432.12    3.29
  -4  -4  -3  436.75    3.17
  -4  -4  -3  454.91    4.45
  -4   4  -3  455.18    3.23
  -4   4  -3  464.92    3.01
  -4   4  -3  446.24    5.49
   4   4   3  428.40    5.86
   0   5  -3 2367.59    7.95
   0   5  -3 2437.88    9.19
   0   5   3 2416.75   11.12
   0   5   3 2473.53   10.32
   0   5  -3 2388.73    8.52
   0   5  -3 2410.97    8.02
   0   5  -3 2478.85    9.16
   1   4   6 1172.72    6.81
   1   4   6 1231.01    8.47
  -1  -4  -6 1181.56    8.90
  -1   4  -6 1238.65    6.01
  -1   4  -6 1232.08    5.12
  -1  -4  -6 1167.53    5.26
  -6   3  -2  114.42    1.64
  -6  -3  -2  121.30    1.77
  -6   3  -2  111.20    1.55
   6   3   2  115.67    1.69
  -6   3  -2  116.49    1.74
  -6  -3  -2  105.60    2.05
  -6   3  -2  112.64    1.97
  -6   3  -2  114.62    2.90
   6   3   2  114.55    3.36
   4   3  -8    0.19    0.51
   4  -3  -8    0.12    0.38
   4   3  -8   -0.11    0.66
  -4   3   8    0.42    0.74
   4   3  -8    0.14    0.54
   4  -3  -8    0.82    1.08
  -4   3   8    0.29    0.65
  -6   3   6  820.04    5.63
   6   3  -6  804.31    5.03
  -6   3   6  820.55    4.35
   6  -3  -6  818.62    6.09
   6   3  -6  779.43    5.00
  -6   3   6  790.30    6.41
  -6   3   6  821.83    5.19
   6   3  -6  794.26    4.88
   0   0 -10    3.81    0.53
   0   0 -10    4.34    0.64
   0   0 -10    3.47    0.38
   0   0 -10    3.36    0.56
   0   0 -10    3.66    1.04
  -5   3  -4  615.31    3.96
  -5   3  -4  659.19    4.29
   5   3   4  633.19    3.90
  -5  -3  -4  622.53    5.23
  -5  -3  -4  632.50    4.09
  -5   3  -4  664.76    3.69
   5   3   4  617.34    6.86
  -5   3  -4  667.34    4.68
  -5   3  -4  651.40    4.17
  -6   0  -5    0.28    0.56
  -6   0  -5    0.34    0.45
   6   0   5    0.92    0.78
  -6   0  -5    0.21    0.42
  -6   0  -5   -0.01    0.62
  -8   1   5    2.80    0.62
   8   1  -5    0.71    0.54
   8   1  -5    0.76    0.58
   8   1  -5    0.53    0.55
   8   1  -5    0.56    0.77
   8  -1  -5    0.38    0.47
  -8   1   5    0.41    0.48
   8   1  -5    0.51    0.61
   8  -1  -5    0.70    0.66
  -5   4  -1   26.95    1.85
  -5   4  -1   31.21    1.01
  -5   4  -1   30.76    0.88
   5   4   1   27.63    2.19
   5  -4   1   28.78    0.84
  -5   4  -1   29.50    0.89
   5   4   1   30.62    1.45
  -5   4  -1   30.74    1.18
   5   4   1   29.08    1.07
  -5  -4  -1   29.13    1.23
  -5  -4  -1   29.10    0.90
   6   0  -9    0.08    0.81
   6   0  -9    0.21    0.48
  -6   0   9   -0.06    0.41
  -2   5   3  292.20    3.03
  -2   5   3  285.41    3.19
   2   5  -3  278.91    2.72
   2   5  -3  284.64    2.96
  -2   5   3  291.17    2.69
   2   5  -3  296.80    2.83
  -2   5   3  289.63    2.79
   2   5  -3  288.11    3.29
  -2   5   3  295.24    3.11
   2   5  -3  294.17    2.94
  -6   2  -4  750.74    4.31
  -6   2  -4  758.04    4.86
   6   2   4  715.25    7.00
  -6   2  -4  736.19    4.82
  -6   2  -4  723.21    4.47
  -6  -2  -4  749.27    4.19
  -7  -1  -3  941.33    5.96
  -7  -1  -3  894.44    5.14
  -7   1  -3  922.89    5.20
  -7   1  -3  923.10    5.54
   7   1   3  909.66    7.25
  -7  -1  -3  935.68    4.84
  -7   1  -3  933.49    5.76
  -7  -1  -3  930.99    4.83
   4  -1 -10  611.01    6.03
  -4   1  10  594.95    4.09
  -4  -1  10  607.25    4.32
   4   1 -10  601.07    4.66
   4  -1 -10  578.40    4.14
   4  -1 -10  592.94    3.25
   4   1 -10  580.07    3.48
   4   1 -10  592.76    3.89
   8  -1   0   25.43    1.02
   8   1   0   24.94    1.10
  -8  -1   0   27.41    0.90
  -8  -1   0   27.87    1.00
  -8   1   0   26.43    1.11
   8   1   0   24.68    1.51
  -8   1   0   25.14    0.95
   6  -2  -8    3.63    1.01
   6   2  -8    3.25    0.83
   6  -2  -8    4.66    0.56
   6   2  -8    4.81    0.69
   6   2  -8    3.89    0.55
  -6  -2   8    4.19    0.48
  -6   2   8    4.70    0.50
   7   0  -8   81.22    1.91
  -7   0   8   84.70    1.56
  -7  -3   2 1507.62    7.30
  -7   3   2 1506.70    6.58
   7   3  -2 1487.46    6.77
   7   3  -2 1493.87   10.97
  -7   3   2 1481.17    8.06
   7  -3  -2 1473.91    5.85
  -7   3   2 1460.35    7.18
   7   3  -2 1495.75    6.39
  -7   3   2 1512.14   10.06
  -4   4   6  666.87    5.91
  -4   4   6  669.64    4.48
   4  -4  -6  658.82    6.02
   4   4  -6  668.14    4.54
   4  -4  -6  646.41    3.65
  -4   4   6  683.64    4.67
   4   4  -6  668.53    4.24
  -8   0   6 1517.73    6.91
   8   0  -6 1538.27    7.72
   8   0  -6 1518.32    6.34
  -2  -1  -9    3.76    0.57
  -2   1  -9    3.12    0.58
  -2   1  -9    3.23    0.67
  -2  -1  -9    4.55    0.54
  -2   1  -9    3.81    0.56
  -2  -1  -9    2.88    1.14
  -2   1  -9    3.28    0.47
  -2  -1  -9    2.98    0.52
   1   5   3  645.99    5.38
   1   5   3  676.17    4.75
   1   5   3  606.06    6.09
  -1   5  -3  650.45    4.02
  -1   5  -3  646.38    6.12
  -1   5  -3  669.77    4.08
  -1   5  -3  634.00    3.68
   1   5   3  647.39    5.55
  -7   3   3    3.59    0.48
   7  -3  -3    3.64    0.51
   7   3  -3    3.73    0.64
   7   3  -3    3.81    0.70
   7   3  -3    3.59    1.39
  -7   3   3    3.24    1.20
  -7   2  -2  314.69    3.04
  -7  -2  -2  321.81    3.51
   7   2   2  316.97    4.68
  -7   2  -2  307.51    3.03
  -7   2  -2  319.81    3.87
  -1   2  -9 1570.18    6.49
  -1   2  -9 1575.30    6.60
  -1  -2  -9 1585.40    6.97
  -1  -2  -9 1577.97    6.67
  -1  -2  -9 1572.84   10.36
  -2   5  -2  191.33    2.28
  -2   5  -2  196.92    2.54
   2   5   2  187.69    2.42
   2   5   2  192.29    2.85
  -2   5  -2  193.02    1.97
  -2   5  -2  199.01    3.64
  -2   5  -2  200.06    2.18
   2   5   2  194.11    3.38
   3   5  -1  122.04    2.69
  -3   5   1  128.23    2.05
  -3   5   1  124.19    1.46
   3   5  -1  121.41    2.85
   3   5  -1  123.16    1.90
  -3   5   1  123.94    2.05
  -3   5   1  125.50    1.94
  -3   5   1  121.64    2.93
   3   5  -1  128.21    1.82
  -1   3  -8   32.73    1.09
  -1   3  -8   41.24    1.21
  -1   3  -8   35.10    1.07
  -1   3  -8   33.15    0.77
  -1  -3  -8   33.73    1.01
  -1  -3  -8   31.10    1.91
   1   3   8   29.94    1.19
  -1   3  -8   25.51    1.05
   0   1 -10  445.08    3.55
   0  -1 -10  436.17    5.44
   0   1 -10  451.55    3.55
   0  -1 -10  442.83    3.61
   0   1 -10  426.98    3.65
   0   1 -10  429.49    3.55
   0  -1 -10  445.12    3.65
   0  -1 -10  417.14    3.37
   2  -4  -7 1103.49    4.52
   2  -4  -7 1105.24    8.88
  -2   4   7 1108.79    6.22
   2   4  -7 1110.42    4.99
  -2   4   7 1080.85    5.80
  -2   4   7 1102.82    7.23
   2   4  -7 1092.73    5.45
   2   4  -7 1088.53    5.33
   2   4  -7 1129.54    5.48
   2   4  -7 1149.57    5.38
  -6   1  -5  520.21    3.73
  -6  -1  -5  523.88    3.67
   6   1   5  499.88    5.29
  -6  -1  -5  518.57    3.65
  -6   1  -5  514.64    4.02
  -6  -1  -5  534.67    4.71
  -6   1  -5  512.79    4.15
  -6  -1  -5  524.01    3.94
   1   4  -7 1164.53    5.04
   1  -4  -7 1176.58    9.06
   1   4  -7 1165.20    5.47
   1   4  -7 1178.31    5.54
   1   4  -7 1161.64    5.79
   7   3  -1  154.97    2.09
  -7   3   1  159.54    2.09
  -7  -3   1  162.85    2.06
  -7   3   1  150.24    2.23
  -7   3   1  147.14    3.24
   7  -3  -1  155.05    1.70
  -7  -3   1  155.88    2.37
   7   3  -1  165.47    2.76
  -7   3   1  159.24    2.63
   3   5   0  145.13    1.96
   3   5   0  139.19    2.01
  -3   5   0  152.22    1.81
  -3   5   0  154.55    3.41
  -3   5   0  149.51    2.08
   3   5   0  140.49    2.89
  -3   5   0  145.75    1.65
  -3   5   0  151.66    2.22
  -3   5   0  153.39    2.24
  -3   5   2   43.89    1.32
   3   5  -2   43.18    1.24
   3   5  -2   42.57    1.77
   3   5  -2   39.61    1.53
  -3   5   2   46.17    1.22
   3  -5  -2   45.47    1.13
  -3   5   2   41.34    0.86
  -3   5   2   41.71    1.30
   3   5  -2   45.38    1.30
   3   5  -2   44.24    1.10
   5   2  -9  204.19    2.31
   5   2  -9  196.60    2.49
  -5   2   9  200.01    2.62
   5  -2  -9  211.54    2.31
  -5  -2   9  216.79    2.41
   5  -2  -9  205.76    1.98
  -5   2   9  209.03    2.24
   5  -2  -9  208.06    3.61
   6   1  -9  155.49    2.00
  -6   1   9  149.93    1.98
   6  -1  -9  149.98    1.84
   6  -1  -9  157.54    2.13
   6   1  -9  144.27    2.28
  -6  -1   9  152.59    2.04
  -6   1   9  149.77    2.15
   6   1  -9  152.73    2.22
  -8   0  -1    0.19    0.45
  -8   0  -1   -0.01    0.46
   8   0   1    0.19    0.92
  -8   0  -1    0.02    0.60
  -8   0  -1   -0.10    0.40
   5   4  -5 1477.88    6.88
   5   4  -5 1448.71    8.84
   5   4  -5 1469.01    6.87
  -5   4   5 1438.03    6.50
  -5   4   5 1417.68    9.16
  -1   5   4 1653.35    7.46
  -1   5   4 1720.86    8.06
   1   5  -4 1680.09    7.02
   1   5  -4 1605.97    7.19
   1   5  -4 1646.80    6.68
   1  -5  -4 1656.19    6.39
   1   5  -4 1690.76    6.56
  -1   5   4 1681.43    7.56
   1   5  -4 1634.22    7.19
  -7   3   4  416.44    3.68
   7   3  -4  438.72    3.56
  -7   3   4  441.64    3.33
   7   3  -4  412.07    3.53
   7   3  -4  415.27    5.48
   7  -3  -4  414.44    3.65
   7   3  -4  392.94    3.47
  -7   3   4  398.17    4.12
   7  -3  -4  429.57    3.04
  -7   3   4  430.03    5.18
   5   0 -10  470.55    3.13
   5   0 -10  456.07    4.63
  -8   2   3  159.25    2.18
   8   2  -3  159.09    2.05
   8   2  -3  157.17    2.37
   8   2  -3  164.06    2.02
   8  -2  -3  156.42    2.20
   8  -2  -3  163.57    1.80
  -8   2   3  167.83    2.21
   8   2  -3  165.12    3.32
  -8   2   3  165.45    2.61
   7  -1  -8  271.50    2.69
  -7  -1   8  260.21    2.68
   7   1  -8  251.56    2.85
  -7   1   8  263.30    2.72
   7  -1  -8  258.46    3.45
   7  -1  -8  256.09    2.43
   7   1  -8  266.11    3.07
   8   2  -2 1336.25    9.43
  -8   2   2 1321.64    6.48
  -8   2   2 1327.17    8.26
  -8   2   2 1328.21    6.55
  -8   2   2 1289.92    7.22
   8  -2  -2 1298.57    5.24
   8  -2  -2 1334.22    6.53
   8   2  -2 1291.98    5.75
   8   2  -2 1325.91    7.08
  -8   1   6  113.79    1.87
   8   1  -6  108.25    1.92
   8   1  -6  110.50    2.32
   8   1  -6  106.63    1.78
   8   1  -6  116.79    1.78
  -8   1   6  107.47    1.93
  -8   1   6  107.85    1.72
   8  -1  -6  108.20    2.11
   8  -1  -6  115.07    1.65
  -8  -1   6  116.66    1.82
   8   1  -6  110.30    1.94
   0   5   4  226.65    2.51
   0   5   4  222.75    2.88
   0   5  -4  222.34    2.18
   0   5  -4  217.22    2.12
   0   5  -4  218.84    2.56
   0   5  -4  224.09    2.62
   0   5   4  229.86    3.40
   7   2  -7   12.32    0.90
   7   2  -7   13.13    0.81
  -7  -2   7   12.77    0.68
  -7   2   7   12.69    0.70
  -7   2   7   13.03    0.88
  -7   2   7   12.52    0.81
   7   2  -7   12.14    0.85
   7   2  -7   13.85    0.90
  -3   4  -5  292.60    3.04
   3   4   5  260.58    2.77
   3   4   5  289.52    4.39
  -3   4  -5  300.76    3.04
   3   4   5  268.79    3.90
  -3   4  -5  283.84    2.37
  -3   4  -5  291.64    2.71
  -3  -4  -5  295.46    3.97
  -3  -4  -5  285.98    2.61
  -4   2  -7 1461.46    6.82
  -4  -2  -7 1473.00    6.74
  -4   2  -7 1438.68    6.98
  -4   2  -7 1429.93    6.70
  -4  -2  -7 1444.95    8.91
  -4   2  -7 1448.19    6.99
  -4  -2  -7 1434.05    6.31
  -3   4   7  148.73    2.76
   3   4  -7  153.25    2.10
  -3   4   7  152.35    2.20
   3   4  -7  145.74    2.04
   3  -4  -7  155.16    3.29
   3  -4  -7  153.95    1.70
  -3   4   7  148.66    2.21
   3   4  -7  152.70    1.86
   3   4  -7  155.31    1.94
   5   4   2   29.24    2.26
  -5   4  -2   29.02    0.93
   5   4   2   29.11    1.47
  -5  -4  -2   29.82    1.33
  -5  -4  -2   28.71    0.92
   5  -4   2   28.82    0.80
  -5   4  -2   29.79    0.93
  -5   4  -2   29.78    1.03
   5   4   2   28.44    1.07
  -5   4  -2   25.77    1.08
   0   4  -7  225.03    2.39
   0   4  -7  211.03    2.50
   0   4  -7  212.66    2.18
   0   4  -7  214.68    2.02
   0  -4  -7  205.94    3.88
   0   4   7  197.12    2.66
   0   4   7  196.57    3.23
   0   4  -7  209.90    2.34
   3   5   1    2.51    0.62
  -3   5  -1    2.18    0.55
  -3   5  -1    2.27    0.70
   3   5   1    2.61    0.57
  -3   5  -1    1.76    0.51
  -3   5  -1    2.10    0.50
  -3   5  -1    2.32    1.23
   3   5   1    2.13    1.34
   3   5   1    2.23    0.68
   3   5   1    2.04    0.95
   3   5   1    1.88    0.69
  -3   5  -1    2.64    0.52
   2   5  -4    5.15    0.64
  -2   5   4    5.72    0.71
   2  -5  -4    5.28    0.63
   2   5  -4    3.69    0.58
  -2   5   4    4.47    0.60
  -2   5   4    4.86    0.61
  -2   5   4    3.17    1.03
  -2   5   4    4.14    0.78
   2   5  -4    3.89    0.62
  -2   5   4    4.45    0.57
  -3   5   3 1037.40    5.59
  -3   5   3 1055.30    6.03
   3   5  -3 1054.02    5.18
   3   5  -3 1095.25    5.82
   3   5  -3 1032.11    5.63
  -3   5   3 1073.66    6.22
   3   5  -3 1069.10    7.14
   2   2 -10   32.12    1.04
   2  -2 -10   31.91    1.11
  -2   2  10   36.08    1.19
  -2  -2  10   29.43    1.07
  -2   2  10   33.89    1.02
   2   2 -10   33.46    1.05
   2   2 -10   32.25    0.97
  -8   2   4  176.41    2.24
   8   2  -4  157.22    2.10
  -8   2   4  165.95    2.68
   8  -2  -4  172.75    1.88
   8   2  -4  165.07    2.38
  -8   2   4  166.00    2.25
   8  -2  -4  166.58    2.41
   8   2  -4  164.19    3.29
   8   2  -4  168.36    2.15
   7  -3   0 1666.56    5.95
  -7   3   0 1621.99    7.68
   7   3   0 1667.41   12.03
  -7   3   0 1720.91    7.43
  -7  -3   0 1744.42    7.17
  -7  -3   0 1628.39    8.12
   7   3   0 1691.77    7.02
  -7   3   0 1652.27   10.56
   2   3  -9   62.08    1.16
   2   3  -9   61.16    1.29
   2   3  -9   61.00    1.17
   2   3  -9   63.39    1.33
   2   3  -9   62.57    1.25
   2   3  -9   60.98    1.27
   2  -3  -9   65.17    1.34
   2   3  -9   63.76    1.04
  -2   3   9   62.31    1.51
   2  -3  -9   62.15    2.53
  -2   4  -6  151.32    1.72
  -2   4  -6  157.17    2.08
  -2   4  -6  161.24    2.24
  -2   4  -6  157.99    2.49
   2   4   6  159.01    2.32
  -2  -4  -6  162.61    1.97
  -2   4  -6  159.31    2.27
   2   4   6  157.44    2.77
  -2  -4  -6  154.89    3.14
  -8   1  -1  429.33    3.84
   8   1   1  426.55    5.03
  -8   1  -1  418.27    3.61
  -8   1  -1  429.37    3.52
  -8  -1  -1  419.70    3.16
  -3   2  -8  719.17    4.52
  -3   2  -8  727.25    4.44
  -3   2  -8  688.72    4.64
  -3   2  -8  687.03    4.63
  -3   2  -8  716.05    4.73
  -3  -2  -8  726.23    6.51
  -3  -2  -8  708.34    4.52
  -1   0 -10 1740.78    6.41
  -1   0 -10 1759.86    7.59
  -1   0 -10 1760.02    7.63
  -1   0 -10 1760.13    7.92
  -1   0 -10 1731.21   10.21
  -8   2   1  389.70    4.40
  -8   2   1  385.69    3.38
   8  -2  -1  357.71    3.19
  -8   2   1  371.99    3.30
  -8  -2   1  373.05    3.64
   5  -3  -8  185.90    3.53
  -5   3   8  186.84    2.67
   5   3  -8  193.80    2.38
  -5   3   8  194.29    3.01
   5   3  -8  195.44    2.45
   5  -3  -8  195.71    1.96
   5   3  -8  196.42    2.55
   3   2 -10  118.90    1.74
  -3   2  10  119.10    1.92
  -3  -2  10  115.18    1.92
   3  -2 -10  118.19    1.84
   3   2 -10  118.66    1.60
   3   2 -10  115.40    1.89
   6   3   3  152.48    3.76
  -6   3  -3  168.68    2.05
  -6   3  -3  160.87    2.32
  -6  -3  -3  144.85    1.99
  -6   3  -3  152.76    2.01
  -6   3  -3  162.84    3.21
  -6  -3  -3  150.79    2.63
  -6   3  -3  153.17    2.13
  -5  -2  -6  319.69    3.99
  -5  -2  -6  314.91    3.00
  -5   2  -6  337.02    3.04
   5   2   6  352.35    3.16
  -5   2  -6  342.89    3.57
  -5   2  -6  345.97    3.28
  -5  -2  -6  326.89    2.85
  -5   2  -6  338.68    3.25
  -5   2  -6  337.44    3.21
   4   4   4  512.76    6.30
  -4   4  -4  502.66    3.58
  -4   4  -4  507.39    5.65
   4   4   4  477.98    3.65
   4   4   4  501.01    5.36
  -4  -4  -4  450.58    4.74
  -4   4  -4  478.05    3.79
  -4  -4  -4  520.79    3.61
   4   3   6   47.40    1.71
  -4   3  -6   42.37    0.96
  -4   3  -6   47.06    1.22
  -4   3  -6   43.92    1.23
  -4   3  -6   51.74    1.44
  -4   3  -6   47.06    1.54
  -4  -3  -6   40.97    1.77
  -4  -3  -6   46.56    1.21
  -4   3  -6   42.72    1.22
   4   3   6   42.62    1.21
   5  -1 -10 1819.49    7.72
  -5   1  10 1782.05    7.51
   5   1 -10 1756.69    6.97
   5   1 -10 1801.62    8.36
   5  -1 -10 1770.47   10.30
   5   1 -10 1768.53    7.95
  -5  -1  10 1796.97    7.79
  -5   1  10 1814.01    7.90
   5  -1 -10 1779.67    6.51
   6   3  -7    0.23    0.69
  -6   3   7    2.16    0.68
   6   3  -7    0.11    0.57
   6  -3  -7    0.23    0.82
  -6   3   7    0.61    0.69
   6   3  -7    1.08    0.75
   6  -3  -7    0.46    0.53
   6   4  -2   22.17    0.95
   6   4  -2   25.29    2.15
  -6   4   2   24.38    1.21
   6   4  -2   24.21    1.07
  -6   4   2   22.48    1.11
  -6   4   2   22.01    1.82
   6  -4  -2   22.18    0.82
   1  -3  -9  321.46    2.90
   1  -3  -9  312.66    4.99
   1   3  -9  327.14    2.96
   1   3  -9  324.87    2.99
  -1   3   9  308.91    3.25
   1   3  -9  318.71    2.65
   1   3  -9  314.53    2.19
   1   3  -9  319.54    2.76
   3   3   7  771.62    5.17
  -3   3  -7  828.31    5.34
  -3   3  -7  810.57    3.90
  -3  -3  -7  801.23    6.96
  -3   3  -7  849.91    5.31
  -3   3  -7  836.01    5.19
   3   3   7  731.62    5.88
  -3  -3  -7  807.83    4.76
  -3   3  -7  841.20    4.99
  -2   5  -3 1191.06    8.81
   2   5   3 1285.86    7.67
  -2   5  -3 1265.55    5.39
  -2   5  -3 1253.52    6.30
   2   5   3 1256.91    8.33
   2   5   3 1224.92    6.51
  -2   5  -3 1295.55    6.57
  -2   5  -3 1273.55    5.90
   2   5   3 1194.58    8.84
   1   2 -10  630.87    4.14
   1  -2 -10  628.32    4.38
   1   2 -10  645.61    4.62
   1   2 -10  639.95    3.65
  -1   2  10  681.00    4.48
  -1   2  10  686.10    4.89
   1  -2 -10  648.19    7.06
   1   2 -10  654.69    4.34
   1   2 -10  651.12    4.21
   3   3  -9  713.70    4.57
   3   3  -9  731.33    3.66
  -3   3   9  711.22    4.74
  -3   3   9  706.09    5.57
   3   3  -9  734.91    4.06
   3   3  -9  726.05    4.55
   3   3  -9  727.52    4.18
  -7   3   5 1901.35    7.47
   7   3  -5 1803.24    7.69
  -7   3   5 1716.09    8.10
   7   3  -5 1753.45    7.58
  -7   3   5 1860.73   10.78
   7  -3  -5 1807.67    8.40
   7   3  -5 1793.05    7.84
   7  -3  -5 1766.34    6.79
  -7   3   5 1743.36    8.91
   7   3  -5 1788.19   11.21
   7   0   4 2085.77   10.66
  -7   0  -4 2074.39    8.89
  -7   0  -4 2053.34    8.76
  -7   0  -4 2082.81    7.53
  -4   0  -8 3512.36   11.05
  -4   0  -8 3466.24   11.21
  -4   0  -8 3523.35   11.11
  -4   0  -8 3528.03   13.77
  -4   0  -8 3471.55   11.90
  -4   0  -8 3576.53   11.94
   6   4  -1  844.62    4.66
   6   4  -1  848.82    6.56
  -6   4   1  866.78    4.25
   6   4  -1  861.38    5.21
  -6  -4   1  857.82    4.74
  -6   4   1  863.85    6.10
  -6   4   1  845.18    7.98
   6  -4  -1  878.48    4.33
   6   4  -1  854.03    8.93
  -6   4   1  859.53    5.53
   6   4  -3   26.03    1.00
   6   4  -3   31.96    1.21
  -6   4   3   30.88    1.18
   6   4  -3   35.34    2.14
  -6   4   3   30.52    1.89
   6  -4  -3   29.35    0.95
  -8   0   7   -0.03    0.41
   8   0  -7   -0.43    0.54
   8   0  -7    0.62    0.60
  -1   5  -4 1149.98    5.60
  -1   5  -4 1137.46    5.71
  -1   5  -4 1164.29    7.99
   1   5   4 1112.07    7.12
   1   5   4 1162.40    7.50
   1   5   4 1108.04    6.45
   1   5   4 1117.16    8.37
  -1   5  -4 1119.83    5.12
  -5   0  -7    0.93    0.71
  -5   0  -7    0.08    0.56
  -5   0  -7    1.66    0.59
  -5   0  -7    1.40    0.49
  -5   0  -7    0.15    0.41
   8   2  -5  229.42    2.59
   8   2  -5  230.51    3.82
   8   2  -5  220.75    2.71
  -8   2   5  238.25    2.59
  -8   2   5  227.96    3.00
   8   2  -5  236.75    2.57
   8  -2  -5  237.32    2.96
   8  -2  -5  229.47    2.26
  -8   2   5  228.77    2.65
   8   2  -5  223.53    2.88
  -1  -1 -10  137.19    3.16
  -1   1 -10  141.83    2.04
  -1  -1 -10  129.60    1.88
  -1  -1 -10  145.42    2.10
  -1   1 -10  135.06    2.05
  -1   1 -10  144.43    2.19
  -1   1 -10  138.27    1.59
  -1  -1 -10  139.70    2.09
   3   5   2   86.23    1.92
  -3   5  -2   82.74    1.69
   3   5   2   89.80    2.62
  -3   5  -2   86.81    1.48
  -3   5  -2   88.55    1.71
  -3   5  -2   86.81    1.39
   3   5   2   87.70    1.68
  -3   5  -2   85.34    2.77
   3   5   2   85.45    2.48
   3   5  -4 1470.74    7.70
  -3   5   4 1342.78    9.33
  -3   5   4 1411.16    7.40
   3   5  -4 1343.53    6.65
   3   5  -4 1428.45    6.81
   3   5  -4 1377.26    6.08
   3  -5  -4 1378.21    5.81
  -3   5   4 1416.74    7.11
  -3   5   4 1369.50    6.68
  -5   4   6   31.09    1.05
   5   4  -6   27.54    1.03
  -5   4   6   30.69    1.16
   5  -4  -6   30.81    1.41
   5   4  -6   30.57    1.18
  -5   4   6   30.69    1.63
   5  -4  -6   29.03    0.93
   5   3   5 1970.63   12.42
   5   3   5 1916.20    7.52
  -5   3  -5 1946.70   10.16
  -5   3  -5 1752.85    8.14
  -5   3  -5 1997.11    8.08
  -5  -3  -5 1636.16    7.38
  -5   3  -5 1945.21    7.77
  -5  -3  -5 1699.35    9.67
  -5   3  -5 1933.18    6.76
  -5   3  -5 1932.14    7.85
   7   2   3   94.65    2.86
  -7  -2  -3   85.69    1.96
  -7   2  -3   97.73    1.79
  -7  -2  -3  102.98    1.52
  -7   2  -3  101.35    1.80
  -7   2  -3   92.17    2.21
  -4   2  10  731.07    4.42
   4   2 -10  737.85    4.31
  -4  -2  10  711.33    4.75
   4  -2 -10  700.87    3.54
   4  -2 -10  714.62    4.50
   4   2 -10  715.54    4.18
  -8  -2   0  680.00    4.33
   8   2   0  694.37    7.00
  -8   2   0  701.02    4.61
  -8   2   0  687.82    5.75
  -8  -2   0  702.08    5.17
  -8   2   0  707.01    4.77
   2   0 -11    0.19    0.95
   2   0 -11    0.43    0.55
   2   0 -11    0.25    0.63
  -2   0  11   -0.02    0.51
  -3   0  -9   -0.48    0.91
  -3   0  -9   -0.12    0.45
  -3   0  -9    0.43    0.48
  -3   0  -9    0.25    0.58
  -3   0  -9    0.02    0.50
  -3   0  -9    0.30    0.55
  -8   0  -2  241.40    2.93
  -8   0  -2  251.88    2.31
   8   0   2  244.44    3.58
  -8   0  -2  253.81    2.86
  -8   0  -2  241.06    2.56
   4   4  -7   82.47    1.53
  -4   4   7   80.94    1.65
   4  -4  -7   77.68    2.34
   4   4  -7   82.20    1.40
  -4   4   7   79.45    2.17
  -4   4   7   85.16    1.73
   4   4  -7   80.61    1.63
   4   4  -7   79.42    1.66
   4  -4  -7   80.40    1.31
  -1   4  -7  783.35    3.98
  -1  -4  -7  817.68    4.48
  -1  -4  -7  784.58    7.36
  -1   4  -7  747.18    4.95
  -1   4  -7  800.10    4.85
   1   4   7  814.90    7.06
  -1   4  -7  764.36    4.58
  -6   4   0  376.93    4.00
  -6   4   0  404.74    5.61
  -6   4   0  396.43    3.23
   6   4   0  362.83    5.95
   6  -4   0  395.62    2.79
  -6   4   0  393.81    2.87
  -6  -4   0  370.71    3.09
  -6   4   0  406.88    3.76
   6   4   0  405.07    4.66
  -6  -4   0  377.54    3.79
   6   4   0  378.08    3.45
  -3   0  11    0.39    0.44
   3   0 -11    0.49    0.64
   3   0 -11   -0.60    0.98
   6   4  -4    4.20    1.35
   6   4  -4    3.75    0.71
   6  -4  -4    4.47    0.63
   6   4  -4    5.03    0.84
  -6   4   4    3.93    1.29
  -6   4   4    5.04    0.80
  -4   5   1   38.76    1.31
  -4   5   1   41.69    0.93
   4   5  -1   43.58    2.13
   4  -5  -1   38.70    1.10
   4   5  -1   45.82    1.33
  -4   5   1   43.37    1.29
  -4   5   1   43.77    1.27
   4   5  -1   44.37    1.75
   4   5  -1   39.48    1.18
  -2   3  -8  359.98    3.05
  -2  -3  -8  348.04    4.82
  -2   3  -8  348.38    2.39
   2   3   8  344.10    3.55
  -2   3  -8  357.37    3.11
  -2   3  -8  359.45    3.38
  -7  -3  -1 1253.54    6.07
  -7   3  -1 1181.89    6.38
  -7  -3  -1 1205.30    7.04
   7   3   1 1273.41   10.50
  -7   3  -1 1289.42    9.17
  -7   3  -1 1290.64    6.39
  -7  -1  -4 1366.27    6.31
  -7  -1  -4 1370.41    6.26
  -7  -1  -4 1425.08    6.98
  -7   1  -4 1354.19    6.55
  -7  -1  -4 1320.80    7.40
  -7   1  -4 1400.12    7.17
   7   1   4 1421.04    9.40
   7  -1   4 1431.85    8.04
  -7   1  -4 1416.38    7.09
  -4   1  -8  883.06    5.19
  -4   1  -8  899.08    5.10
  -4  -1  -8  907.19    5.34
  -4  -1  -8  936.97    5.24
  -4   1  -8  885.79    4.69
  -4   1  -8  885.79    5.48
  -4  -1  -8  890.99    6.94
  -4   1  -8  856.39    5.22
   1   5  -5  171.32    1.98
   1   5  -5  175.96    2.27
   1   5  -5  167.09    2.24
  -1   5   5  169.64    2.57
   1  -5  -5  171.86    1.82
   1   5  -5  173.71    1.87
  -1   5   5  175.23    2.39
  -1   5   5  175.53    2.24
   4  -5  -2 1401.97    5.98
  -4   5   2 1392.99    7.50
  -4   5   2 1382.86    7.00
   4   5  -2 1335.85    6.50
  -4   5   2 1363.08    9.82
   4   5  -2 1344.75    8.34
   4   5  -2 1410.89    9.55
  -4   5   2 1385.58    6.95
  -4   5   2 1417.45    5.29
  -2   2  -9  311.25    2.97
  -2  -2  -9  322.64    4.84
  -2   2  -9  303.35    3.09
  -2   2  -9  323.86    2.72
  -2   2  -9  336.32    3.30
  -2   2  -9  316.62    3.19
  -2   2  -9  335.21    2.72
  -2  -2  -9  320.68    3.06
   0   3  -9 2715.49    9.75
   0   3  -9 2654.89    9.88
   0   3  -9 2624.62    7.57
   0  -3  -9 2622.05    9.43
   0   3  -9 2677.60    9.81
   0   3  -9 2641.65    9.03
   0  -3  -9 2612.40   14.51
   0   3   9 2740.85   10.66
  -8   1   7  155.67    2.17
   8  -1  -7  159.27    1.99
   8   1  -7  148.75    2.25
   8   1  -7  153.71    2.21
  -8  -1   7  149.55    2.06
   8   1  -7  145.23    2.27
   8  -1  -7  157.08    2.55
   8   1  -7  151.31    2.05
  -8   1   7  151.96    2.11
  -5  -1  -7   70.55    1.42
  -5   1  -7   67.81    1.46
  -5  -1  -7   65.01    1.91
  -5   1  -7   70.81    1.27
  -5   1  -7   73.29    1.58
  -5  -1  -7   71.11    1.49
  -5   1  -7   65.15    1.46
  -5  -1  -7   76.32    1.56
   4  -3  -9   36.98    1.98
   4  -3  -9   35.50    0.86
  -4   3   9   34.22    1.31
  -4   3   9   37.59    1.46
   4   3  -9   36.73    1.23
  -4   3   9   33.32    1.07
   4   3  -9   36.30    1.15
   4   3  -9   36.94    1.17
   0   2 -10 1013.73    5.35
   0   2 -10 1061.73    5.66
   0  -2 -10 1013.32    5.62
   0   2 -10 1050.44    5.92
   0   2 -10 1038.86    5.08
   0  -2 -10 1046.49    8.88
  -6   2  -5 2175.81    9.83
  -6   2  -5 2125.65    8.73
   6   2   5 2087.52   12.59
  -6   2  -5 2142.28    8.93
  -6  -2  -5 2126.69    7.93
   7   0  -9   -0.35    0.82
   7   0  -9    0.23    0.55
   7   0  -9    0.06    0.59
  -7   0   9    0.05    0.42
   2   5  -5   61.01    1.47
   2   5  -5   62.70    1.28
  -2   5   5   61.57    1.33
  -2   5   5   59.46    1.29
  -2   5   5   63.25    2.05
  -2   5   5   63.24    1.66
   2   5  -5   60.99    1.35
  -2   5   5   59.37    1.51
   2   5  -5   58.45    1.31
   2  -5  -5   59.67    1.17
   2   5  -5   57.16    1.25
  -4   5   0  294.97    2.41
   4   5   0  280.56    3.01
   4   5   0  298.92    4.33
  -4   5   0  303.42    3.12
  -4   5   0  292.16    3.01
   4   5   0  290.80    2.84
  -4   5   0  288.71    2.45
  -4   5   0  297.82    3.23
   4  -5   0  300.59    2.65
  -6  -2   9 4629.50   13.57
   6  -2  -9 4632.27   12.44
   6   2  -9 4528.05   14.46
   6   2  -9 4541.71   13.19
  -6   2   9 4489.73   14.95
   6  -2  -9 4617.70   17.63
   6   2  -9 4598.79   13.55
   5   4   3  411.13    4.88
  -5   4  -3  425.54    2.97
  -5  -4  -3  409.97    3.26
  -5   4  -3  411.63    5.38
  -5   4  -3  423.24    3.84
  -5  -4  -3  407.37    4.44
  -5   4  -3  429.66    3.48
   5   4   3  435.00    6.22
  -5   4  -3  417.06    3.24
  -6   0  -6 1377.00    6.46
  -6   0  -6 1381.88    7.71
   0   5   5   11.49    1.08
   0   5   5   12.32    0.88
   0   5  -5   11.55    0.87
   0   5   5   13.64    0.81
   0  -5  -5   11.72    0.62
   0   5  -5   11.52    0.84
   0   5  -5   12.77    0.64
   0   5  -5   11.81    0.84
   1   0 -11    0.08    0.68
   1   0 -11    0.55    0.97
   1   0 -11    0.30    0.53
  -9   0   3   -0.03    0.45
   9   0  -3   -0.14    0.72
   9   0  -3    0.33    0.90
   9   0  -3   -0.04    0.47
  -6   0  10  301.83    2.99
   6   0 -10  309.35    2.69
   4  -5  -3 1454.34    6.05
  -4   5   3 1436.21    7.00
  -4   5   3 1413.51    6.97
  -4   5   3 1388.05    9.70
   4   5  -3 1478.16    9.32
   4   5  -3 1453.26    6.80
  -4   5   3 1433.27    7.57
   7  -3  -6  276.80    2.52
   7   3  -6  275.78    2.97
  -7   3   6  268.14    3.00
  -7   3   6  266.68    3.37
   7   3  -6  274.72    2.92
   7   3  -6  273.71    2.73
   7  -3  -6  267.52    3.33
   2   1 -11  898.34    5.24
   2  -1 -11  838.84    5.23
   2  -1 -11  850.34    7.67
   2   1 -11  850.02    5.23
   2   1 -11  811.11    4.98
   2  -1 -11  839.34    5.09
  -2   1  11  859.43    5.31
  -2  -1  11  893.90    5.95
  -3  -1  -9 1069.04    5.90
  -3   1  -9 1043.24    5.34
  -3   1  -9 1017.70    5.16
  -3  -1  -9 1001.04    5.17
  -3   1  -9 1044.50    5.88
  -3   1  -9 1070.17    6.20
  -3  -1  -9 1043.00    7.88
  -3   1  -9 1033.72    5.73
  -3  -1  -9  989.51    5.19
  -8  -1  -2 2722.05   10.23
  -8   1  -2 2701.20   10.35
  -8  -1  -2 2731.38    9.24
   8   1   2 2693.35   13.42
  -8  -1  -2 2756.06   11.21
  -8   1  -2 2696.05    9.93
  -8  -1  -2 2687.63    8.90
  -9   0   2  195.15    2.48
   9   0  -2  181.56    2.62
   9   0  -2  179.12    3.18
  -9   0   2  192.32    2.01
   9   0  -4  276.15    3.60
   9   0  -4  273.96    3.13
   9   0  -4  269.64    2.49
   4   0 -11   -0.40    0.90
   4   0 -11    0.11    0.67
  -7   2   8  210.73    2.80
  -7   2   8  204.31    2.60
   7  -2  -8  209.14    2.19
  -7   2   8  213.15    2.44
   7   2  -8  203.48    2.41
   7   2  -8  203.21    2.66
  -7  -2   8  215.74    2.48
   7   2  -8  198.60    2.62
   7  -2  -8  205.04    3.19
  -3   1  11  171.18    2.30
   3  -1 -11  165.67    3.35
   3   1 -11  164.48    2.25
  -3  -1  11  162.96    2.34
   3   1 -11  158.71    2.14
   3  -1 -11  166.32    2.28
  -3   1  11  161.12    2.21
   8   2  -6   10.01    0.81
   8  -2  -6   10.73    0.99
   8  -2  -6   11.50    0.75
  -8   2   6    9.55    0.61
  -8   2   6   10.68    0.90
   8   2  -6   10.40    0.85
  -8   2   6   12.10    0.82
   8   2  -6   11.14    0.91
   8   2  -6   12.27    1.30
   8   2  -6   10.51    0.86
  -2   4   8  212.54    2.54
   2   4  -8  216.21    2.24
   2   4  -8  212.75    2.30
   2   4  -8  221.43    2.35
  -2   4   8  212.46    3.22
   2  -4  -8  213.32    4.14
   2   4  -8  216.40    2.36
  -2   4   8  214.83    2.75
   2   4  -8  216.31    2.14
   2   4  -8  216.50    2.05
   2   5   4 2262.61    9.39
  -2   5  -4 2259.14    7.77
   2   5   4 2116.84   10.94
   2   5   4 2203.47   12.40
  -2   5  -4 2215.92    8.67
  -2  -5  -4 2338.75   12.08
  -2   5  -4 2203.78    8.29
  -2   5  -4 2197.87    9.24
   2   5   4 2239.22   10.55
  -2   5  -4 2195.97   11.75
   6   4   1 1664.82    9.92
  -6   4  -1 1654.31   11.27
   6   4   1 1718.50    7.52
  -6  -4  -1 1683.86    7.00
   6   4   1 1675.05   12.82
   6  -4   1 1674.99    6.08
  -6   4  -1 1660.66    6.37
  -6   4  -1 1708.14    7.11
  -6   4  -1 1657.26    7.92
  -1   4   8 1124.36    7.58
   1   4  -8 1167.73    5.59
   1   4  -8 1154.34    5.90
   1   4  -8 1163.58    5.43
  -1   4   8 1138.46    6.41
   1  -4  -8 1137.05    9.42
   1   4  -8 1189.29    5.58
  -6   4   5  230.44    2.89
   6  -4  -5  235.00    2.33
  -6   4   5  236.34    3.99
  -6   4   5  238.49    3.23
   6   4  -5  225.74    2.69
   6   4  -5  245.46    3.91
   6   4  -5  237.71    2.85
   7   1  -9 1713.85    7.24
  -7  -1   9 1692.70    7.45
  -7   1   9 1723.92    7.55
   7  -1  -9 1673.76    6.86
   7   1  -9 1660.44    8.06
   7  -1  -9 1687.06    7.37
   7   1  -9 1649.24    7.85
   4   5   1  336.34    2.97
   4  -5   1  334.34    2.77
   4   5   1  342.48    3.26
   4   5   1  334.31    2.88
   4   5   1  350.14    5.25
  -4   5  -1  335.99    3.25
  -4   5  -1  338.14    2.63
  -4   5  -1  338.96    2.82
  -4   5  -1  328.58    3.26
  -4   5  -1  338.67    5.15
   4   5   1  332.13    4.67
  -6   1  -6    8.94    0.72
  -6  -1  -6   10.85    0.77
  -6   1  -6   10.46    0.86
  -6  -1  -6   13.19    1.06
  -6   1  -6   11.83    0.72
  -6  -1  -6   10.00    0.69
  -6  -1  -6   10.23    0.75
   8   2   1   24.56    1.89
  -8   2  -1   27.75    1.03
  -8   2  -1   26.24    1.02
  -8   2  -1   23.71    1.30
  -8  -2  -1   28.35    1.31
  -8  -2  -1   29.64    1.01
  -1   1  11  138.35    2.27
   1  -1 -11  139.10    2.16
   1   1 -11  123.85    2.00
   1   1 -11  133.96    2.03
   1   1 -11  131.23    2.19
   1  -1 -11  133.54    3.16
   1  -1 -11  128.65    1.97
  -3   5  -3   38.65    1.29
   3   5   3   36.32    1.40
  -3   5  -3   41.29    1.05
  -3   5  -3   39.88    1.24
   3   5   3   39.38    1.21
  -3   5  -3   40.14    1.14
   3   5   3   37.01    1.86
  -3   5  -3   36.64    1.91
   9   1  -3  564.54    4.57
   9  -1  -3  560.83    3.50
   9   1  -3  560.88    3.70
   9   1  -3  559.39    5.80
   3   5  -5   67.47    1.45
  -3   5   5   65.50    2.16
  -3   5   5   64.16    1.64
  -3   5   5   65.76    1.44
   3  -5  -5   70.09    1.29
   3   5  -5   64.78    1.26
  -3   5   5   72.27    1.66
   3   5  -5   68.27    1.54
   6   1 -10  242.54    2.52
   6   1 -10  229.59    2.81
  -6  -1  10  236.25    2.64
   6  -1 -10  235.66    3.53
   6   1 -10  232.85    2.84
   6  -1 -10  237.06    2.70
  -6   1  10  236.55    2.57
   6  -1 -10  235.30    2.31
   9   0  -1    0.43    0.69
  -9   0   1   -0.06    0.39
  -9   0   1   -0.02    0.47
   9   0  -1    0.17    0.81
  -2   0 -10  547.66    4.49
  -2   0 -10  560.94    3.61
  -2   0 -10  546.23    5.57
  -2   0 -10  559.95    4.13
  -3   4  -6    3.99    0.74
  -3   4  -6    3.81    0.72
   3   4   6    3.91    0.69
   3   4   6    3.79    0.93
  -3   4  -6    3.54    0.57
  -3  -4  -6    3.98    0.55
  -3   4  -6    3.76    0.73
  -3   4  -6    4.15    0.81
   3   4   6    4.54    1.10
  -3  -4  -6    4.10    1.24
   9   0  -5    1.38    0.59
   9   0  -5    0.10    0.80
  -9   0   5    0.31    0.41
   9   0  -5    0.77    0.76
  -6   3  -4  149.49    2.17
  -6  -3  -4  140.70    2.01
  -6  -3  -4  142.26    2.74
   6   3   4  140.68    3.62
  -6   3  -4  141.71    1.97
  -6   3  -4  140.84    2.23
  -6   3  -4  141.16    2.03
   3  -4  -8  688.58    3.57
  -3   4   8  678.30    5.81
   3   4  -8  693.55    4.36
   3  -4  -8  685.16    6.91
  -3   4   8  685.01    4.75
  -3   4   8  695.36    4.79
   3   4  -8  675.96    3.87
   3   4  -8  694.14    4.44
   3   4  -8  698.07    4.25
   3   4  -8  682.22    3.95
  -5  -2  10    4.42    0.53
   5   2 -10    3.61    0.81
   5  -2 -10    4.31    0.60
  -5   2  10    3.87    0.67
   5  -2 -10    3.97    1.36
   5   2 -10    4.01    0.75
  -5   2  10    5.02    0.51
   5   2 -10    4.78    0.66
   5  -2 -10    4.46    0.54
   8   0  -8    0.28    0.56
   8   0  -8    2.05    0.65
  -8   0   8    0.57    0.40
   8   0  -8    0.21    0.75
   9   1  -2   99.12    2.64
   9  -1  -2   93.56    1.86
  -9  -1   2   97.90    1.59
  -9  -1   2  102.21    1.81
   9   1  -2   96.52    2.00
   6   3  -8  294.69    3.04
   6   3  -8  299.70    3.17
   6  -3  -8  282.39    3.96
   6  -3  -8  291.97    2.53
  -6   3   8  286.55    3.19
  -6   3   8  290.73    3.35
   1   5   5  114.41    2.49
   1   5   5  120.82    1.88
  -1   5  -5  113.89    1.75
  -1   5  -5  119.84    1.82
   1   5   5  117.29    2.14
  -1   5  -5  105.26    1.92
  -1  -5  -5  120.53    2.90
   1   5   5  113.94    2.25
   1   5   5  108.24    2.74
   9   1  -4 1155.59    5.57
   9  -1  -4 1156.95    5.32
  -9  -1   4 1137.64    6.19
   9   1  -4 1151.62    8.08
   9  -1  -4 1156.37    6.60
   4   1 -11   53.03    1.28
  -4  -1  11   53.36    1.38
   4  -1 -11   54.10    2.13
   4  -1 -11   50.85    1.35
  -4   1  11   53.50    1.32
   4   1 -11   51.14    1.39
  -4   5   4   33.25    1.18
   4   5  -4   31.68    1.21
   4   5  -4   34.33    1.44
  -4   5   4   33.19    1.27
  -4   5   4   36.27    1.19
   4   5  -4   38.61    1.29
  -4   5   4   39.06    1.93
   4   4   5  951.00    7.66
  -4   4  -5  993.45    5.28
  -4  -4  -5  964.44    7.39
   4   4   5  961.48    8.32
  -4   4  -5  998.22    7.31
   4   4   5  957.65    5.39
  -4   4  -5 1002.09    5.75
  -4   4  -5  984.78    4.66
  -4  -4  -5  967.24    5.24
  -7   3  -2  949.71    7.34
  -7   3  -2  940.31    5.77
  -7  -3  -2  959.41    5.30
  -1  -3  -9  446.52    3.58
  -1   3  -9  484.56    3.89
  -1   3  -9  466.46    3.87
  -1  -3  -9  463.78    5.88
  -1   3  -9  474.42    2.70
  -1   3  -9  467.96    3.53
  -1   3  -9  485.67    3.88
   1   3   9  468.18    4.20
   0   0 -11    0.05    0.64
   0   0 -11    0.43    1.05
   0   0 -11   -0.04    0.65
   0   0 -11    0.22    0.47
   0   0 -11    0.15    0.57
   0   4  -8  219.18    2.45
   0   4  -8  220.19    2.03
   0   4   8  228.29    2.94
   0   4  -8  220.54    2.57
   0   4  -8  223.96    2.41
  -5   4   7  813.43    5.42
   5  -4  -7  806.90    6.53
  -5   4   7  782.39    5.70
   5   4  -7  793.21    4.16
   5   4  -7  778.48    5.13
   5   4  -7  796.04    4.99
  -5   4   7  820.20    6.81
   5  -4  -7  794.79    4.24
   5   3  -9   34.93    1.30
   5   3  -9   33.44    1.17
  -5   3   9   31.71    1.29
   5  -3  -9   31.96    0.88
   5   3  -9   32.19    1.13
   5  -3  -9   32.21    1.92
  -2   4  -7 1848.23    8.10
  -2  -4  -7 1839.17   11.47
   2   4   7 1947.86   11.53
  -2  -4  -7 1912.21    7.50
  -2   4  -7 1806.96    7.83
  -2   4  -7 1889.47    8.13
  -2   4  -7 1877.84    6.61
   2   4   7 1805.26    8.50
  -1   2 -10 1493.74    7.18
  -1  -2 -10 1458.48   10.45
  -1  -2 -10 1459.85    6.98
  -1   2 -10 1447.54    6.34
  -1   2 -10 1479.91    6.47
   9   1  -1   38.14    1.40
  -9  -1   1   38.74    1.04
   9  -1  -1   36.99    1.25
  -2   1 -10   42.81    1.25
  -2  -1 -10   43.83    2.02
  -2  -1 -10   39.98    1.04
  -2   1 -10   41.03    0.97
  -2   1 -10   41.13    1.15
  -2   1 -10   39.94    1.31
  -2  -1 -10   38.81    1.09
   5   0 -11    0.01    0.63
   5   0 -11   -0.19    0.79
   5   0 -11    0.45    0.45
   8   0   3    0.26    0.89
  -8   0  -3    0.20    0.70
  -8   0  -3    0.14    0.54
  -8   0  -3    0.11    0.43
   9   1  -5  188.01    2.26
   9  -1  -5  190.52    2.13
   9  -1  -5  181.64    2.60
  -9   1   5  190.51    2.52
   9   1  -5  185.91    3.28
  -7   0  -5    0.48    0.43
  -7   0  -5   -0.03    0.73
   7   0   5    0.12    0.94
  -7   0  -5    0.12    0.61
   8  -1  -8  128.37    2.44
   8   1  -8  131.98    2.18
  -8   1   8  130.37    2.00
   8   1  -8  135.41    2.00
   8   1  -8  127.75    2.10
   8   3  -3  157.38    2.23
   8   3  -3  167.22    3.91
  -8   3   3  161.37    2.74
  -8   3   3  159.28    3.26
   8   3  -3  165.73    2.14
   8  -3  -3  164.25    1.87
  -8   3   3  162.71    2.37
  -8  -3   3  163.50    2.40
  -1   5   6  571.21    5.57
  -1   5   6  573.25    4.64
  -1   5   6  557.59    4.42
   1  -5  -6  580.95    6.19
   1   5  -6  541.24    3.53
   1   5  -6  557.95    3.94
   1   5  -6  561.49    4.01
  -1   5   6  583.14    3.94
   1  -5  -6  565.85    3.19
   1   5  -6  548.87    3.98
  -4   5  -2 1095.30    5.08
  -4   5  -2 1127.47    9.33
  -4   5  -2 1123.27    6.27
  -4   5  -2 1119.80    6.22
  -4   5  -2 1147.16    5.41
   4   5   2 1116.76    6.56
   4   5   2 1161.45    9.46
   4   5   2 1086.08    5.53
   4  -5   2 1102.44    5.14
   8   3  -2    0.23    0.55
  -8   3   2    0.59    1.09
  -8   3   2   -0.04    0.64
  -8  -3   2    0.19    0.61
   8  -3  -2    0.46    0.48
  -8   3   2    0.76    0.85
   8   3  -2    1.10    1.68
   8   3  -2    0.48    0.58
  -8  -3   2    0.38    0.65
  -7   2  -4    0.11    0.54
   7   2   4   -0.18    1.33
  -7  -2  -4    1.57    0.49
  -7   2  -4    0.08    0.87
  -7  -2  -4    0.22    0.64
  -4   2  -8    1.64    0.62
  -4  -2  -8    1.77    0.70
  -4  -2  -8    1.71    1.08
  -4  -2  -8    1.98    0.60
  -4   2  -8    1.86    0.65
  -4   2  -8    2.13    0.60
  -9   0   0 1935.12    7.00
  -9   0   0 1935.25    8.62
   9   0   0 1918.03   10.37
   7   3  -7    6.43    0.80
  -7   3   7    7.80    0.85
   7   3  -7    7.55    0.91
   7   3  -7    6.37    0.87
  -7   3   7    6.58    0.89
   7  -3  -7    6.57    0.90
  -2   5   6  609.64    4.71
  -2   5   6  612.41    4.10
   2   5  -6  599.91    3.95
   2   5  -6  591.60    4.01
   2   5  -6  597.40    4.27
   2   5  -6  616.49    4.00
  -2   5   6  602.12    5.81
   2  -5  -6  590.50    3.37
  -4  -3  -7   29.95    1.06
  -4   3  -7   30.31    1.13
  -4   3  -7   29.81    1.15
  -4   3  -7   30.60    1.22
  -4  -3  -7   33.58    1.79
  -4   3  -7   27.10    0.83
  -4   3  -7   28.99    1.18
   4   3   7   33.17    1.15
   9   0  -6    6.08    0.91
   9   0  -6    5.20    0.66
   9   0  -6    6.15    0.69
   9   0  -6    4.53    0.85
   8   2  -7 1633.61    7.54
  -8   2   7 1649.43    8.21
   8   2  -7 1635.56    7.60
   8   2  -7 1638.05    7.88
  -8   2   7 1608.47    7.59
   8  -2  -7 1639.67    6.65
   8   2  -7 1633.15    7.37
   8  -2  -7 1596.77    8.50
   0  -1 -11  362.64    3.41
   0   1 -11  355.97    3.40
   0   1 -11  353.47    3.27
   0  -1 -11  362.06    5.16
  -6   4  -2    6.15    0.84
   6   4   2    7.78    1.82
  -6   4  -2    7.07    0.66
  -6   4  -2    5.79    1.53
  -6  -4  -2    5.05    0.59
  -6  -4  -2    6.87    0.98
  -6   4  -2    6.02    0.67
  -6   4  -2    6.21    0.66
  -5   2  -7  171.02    2.35
  -5   2  -7  176.82    2.49
  -5  -2  -7  167.82    2.12
  -5   2  -7  171.07    2.21
  -5  -2  -7  166.70    3.10
  -4   4   8   99.40    2.09
   4   4  -8  103.40    1.48
   4   4  -8  107.89    1.81
  -4   4   8  103.69    2.46
   4  -4  -8  102.93    1.46
  -4   4   8  106.30    1.97
  -4   4   8  102.11    1.88
   4  -4  -8   99.05    2.66
   4   4  -8  106.53    1.73
   4   4  -8   98.85    1.82
   6   4  -6  447.35    3.86
   6   4  -6  440.17    3.80
  -6   4   6  445.01    4.43
   6  -4  -6  452.14    4.30
   6   4  -6  453.54    4.01
  -5   4  -4 1299.83    6.09
   5   4   4 1307.19    5.97
  -5   4  -4 1347.57    7.03
   5   4   4 1337.69   10.63
  -5   4  -4 1365.56    9.01
  -5  -4  -4 1308.09    6.21
  -5   4  -4 1307.75    6.52
  -5  -4  -4 1275.80    8.24
   2   3 -10  509.47    3.71
   2   3 -10  494.32    3.45
   2  -3 -10  490.54    6.36
   2   3 -10  494.76    3.18
   2   3 -10  494.61    3.67
  -2   3  10  483.49    4.09
   2  -3 -10  504.32    3.71
  -2   3  10  481.33    4.56
   2   3 -10  489.62    3.41
   8   3  -4  457.36    6.01
   8  -3  -4  481.21    3.28
   8  -3  -4  461.49    3.77
  -8   3   4  482.86    5.58
   8   3  -4  472.13    3.80
   8   3  -4  490.65    3.80
  -8  -3   4  465.87    3.93
  -8   3   4  459.18    3.94
  -8   3   4  469.45    4.62
  -5   5   2  437.63    3.67
   5   5  -2  444.51    3.60
  -5   5   2  439.29    2.84
   5  -5  -2  445.36    3.22
   5   5  -2  446.19    5.75
   5   5  -2  446.64    3.88
  -5   5   2  453.24    5.94
  -5   5   2  448.12    3.96
  -3  -3  -8  156.78    2.16
  -3   3  -8  152.93    2.09
  -3   3  -8  160.95    2.34
  -3   3  -8  159.01    1.67
  -3  -3  -8  157.39    3.41
  -3   3  -8  154.58    2.31
   0   5  -6 1263.07    5.53
   0   5   6 1271.52    6.38
   0   5   6 1273.13    7.00
   0   5  -6 1264.67    6.54
   0   5  -6 1300.61    5.75
   0  -5  -6 1332.92    9.62
   0   5   6 1313.91    6.81
  -5  -5   1  164.28    1.92
   5   5  -1  184.62    4.02
  -5   5   1  179.84    1.90
  -5   5   1  182.38    2.72
  -5   5   1  180.07    2.34
  -5   5   1  170.34    3.82
  -5   5   1  171.67    2.49
   5  -5  -1  171.84    2.01
   5   5  -1  187.34    2.51
   5   5  -1  176.39    2.25
   8  -3  -1 1087.07    4.74
  -8  -3   1 1097.16    5.71
  -8   3   1 1087.74    6.15
  -8   3   1 1058.56    8.15
   8   3  -1 1060.52    5.44
  -8  -3   1 1052.95    6.51
   3   3 -10   14.49    0.84
  -3   3  10   13.39    1.06
   3   3 -10   13.73    0.82
   3   3 -10   14.36    0.71
   3   3 -10   13.41    0.69
  -3   3  10   15.36    0.90
   3  -3 -10   13.32    0.73
   3  -3 -10   12.72    1.72
  -4   5   5  610.46    4.49
  -4   5   5  616.72    6.31
   4  -5  -5  617.43    3.73
  -4   5   5  611.04    4.49
   4   5  -5  626.82    4.50
   4   5  -5  617.17    4.51
  -4   5   5  627.93    5.11
   4   5  -5  607.69    4.59
   5   1 -11 1337.93    6.91
   5  -1 -11 1301.70    5.34
   5   1 -11 1302.45    5.69
  -5   1  11 1311.56    6.67
   5   1 -11 1305.22    6.74
   5  -1 -11 1268.21    8.68
   5  -1 -11 1244.31    6.64
   8   1   3  283.55    4.31
  -8  -1  -3  287.84    2.72
  -8  -1  -3  286.26    3.46
   8  -1   3  289.70    3.73
  -8   1  -3  284.49    2.98
  -8  -1  -3  283.98    2.63
  -8   1  -3  289.79    3.15
  -5  -3  -6    3.93    1.13
  -5   3  -6    4.31    0.87
  -5   3  -6    4.75    0.78
  -5   3  -6    4.47    0.58
  -5   3  -6    4.12    0.73
   5   3   6    3.91    0.59
  -5  -3  -6    4.75    0.73
   5   3   6    4.16    1.37
  -5   3  -6    3.64    0.67
  -7  -1  -5    7.83    0.68
  -7   1  -5    6.99    0.83
   7   1   5    7.99    1.29
   7  -1   5   10.24    0.97
  -7  -1  -5    7.08    0.71
  -7  -1  -5    8.75    1.02
   2   2 -11  206.20    2.50
   2   2 -11  207.08    2.43
   2   2 -11  205.14    2.28
   2  -2 -11  216.53    4.37
  -2   2  11  209.65    2.67
   2  -2 -11  213.56    2.57
   2   2 -11  211.67    2.31
  -3   2  -9  662.45    4.58
  -3   2  -9  660.20    4.70
  -3  -2  -9  668.91    4.57
  -3   2  -9  664.84    4.18
  -3  -2  -9  654.47    6.61
  -8  -2  -2 1676.31    8.73
   8   2   2 1697.87   11.64
  -8  -2  -2 1746.89    7.35
  -8   2  -2 1703.18    7.66
  -8   2  -2 1748.11    8.85
   1   3 -10  690.21    4.32
   1   3 -10  686.16    4.44
   1   3 -10  687.37    4.18
   1  -3 -10  689.11    4.46
  -1   3  10  673.47    4.95
   1  -3 -10  668.80    7.49
   1   3 -10  670.93    3.93
   3   2 -11   43.90    1.25
   3  -2 -11   41.89    1.25
   3   2 -11   44.40    1.28
   3   2 -11   43.58    1.13
  -3   2  11   43.11    1.23
   3   2 -11   42.69    1.07
   7   4  -2 1195.77    5.84
   7   4  -2 1232.72   10.74
  -7  -4   2 1273.90    6.04
   7  -4  -2 1206.55    5.35
  -7   4   2 1237.80    6.86
  -7  -4   2 1162.31    6.60
   7   4  -2 1237.47    6.43
  -7   4   2 1213.45    9.53
   5   5  -3  218.05    3.76
  -5   5   3  224.22    2.60
   5  -5  -3  222.47    2.28
  -5   5   3  222.02    3.11
   5   5  -3  216.01    2.76
  -5   5   3  224.14    2.83
  -5   5   3  225.28    4.34
  -9   1   0  832.53    5.09
  -9  -1   0  823.91    4.56
  -3   5  -4 2079.86    8.13
  -3   5  -4 2095.02   11.48
   3   5   4 2001.92   11.12
  -3  -5  -4 2114.29   11.41
  -3   5  -4 2061.19    7.37
  -3   5  -4 2045.54    8.79
   3   5   4 2035.41    8.62
  -3   5  -4 2067.90    8.64
   3   5   4 2124.28   10.18
   2   5   5    9.11    0.87
   2   5   5    9.69    1.11
   2   5   5   10.35    1.08
  -2  -5  -5   11.56    1.46
  -2   5  -5    9.74    1.10
  -2   5  -5    8.98    0.78
  -2   5  -5    9.76    0.92
  -2   5  -5   10.43    0.74
   7   4  -3  293.13    2.89
   7   4  -3  288.70    3.12
   7  -4  -3  290.34    2.55
  -7   4   3  300.91    3.28
   7   4  -3  303.37    5.17
  -7   4   3  285.81    4.74
   3   5  -6    0.97    0.39
   3   5  -6    0.96    0.68
  -3   5   6    1.19    0.69
  -3   5   6    0.73    1.15
   3   5  -6    1.31    0.66
  -3   5   6    1.23    0.57
   3  -5  -6    0.95    0.51
   3   5  -6    0.87    0.56
  -3   5   6    1.03    0.69
   9   1  -6   15.60    0.92
   9   1  -6   14.86    0.99
   9   1  -6   15.83    1.28
   9  -1  -6   14.84    1.02
   9  -1  -6   14.44    0.81
   9   1  -6   15.50    0.87
   9   1  -6   14.66    0.93
   5   5   0 1173.88    5.74
  -5   5   0 1166.92    6.67
  -5   5   0 1151.30    5.12
  -5   5   0 1211.78    6.60
  -5   5   0 1190.56    6.09
   5   5   0 1145.63    6.33
  -5  -5   0 1165.50    5.41
  -1  -4  -8   16.17    0.78
  -1   4  -8   16.75    0.90
  -1   4  -8   17.29    0.97
  -1   4  -8   16.46    0.64
  -1  -4  -8   15.57    1.78
  -1   4  -8   17.66    0.86
  -5   0  -8 2620.52   10.15
  -5   0  -8 2586.23   11.63
   7   0 -10 1153.79    7.03
   7   0 -10 1156.93    5.59
   7  -2  -9  639.80    3.91
   7  -2  -9  659.48    5.81
   7   2  -9  653.13    4.43
   7   2  -9  659.03    4.72
  -7   2   9  662.17    5.05
  -7   2   9  653.18    4.71
   7   2  -9  657.55    4.35
   8  -3  -5   28.13    0.95
   8   3  -5   28.63    1.10
   8  -3  -5   29.45    1.13
  -8   3   5   27.94    1.14
   8   3  -5   25.67    1.14
   8   3  -5   27.75    1.80
   8   3  -5   30.51    1.16
  -8   3   5   26.71    1.32
  -7  -4   1   77.99    1.51
  -7  -4   1   71.97    1.68
   7   4  -1   69.20    3.14
   7   4  -1   81.63    1.68
   7  -4  -1   77.80    1.31
  -7   4   1   80.50    2.81
  -7   4   1   80.29    1.80
  -4   0  -9    0.09    0.53
  -4   0  -9    0.41    0.91
  -4   0  -9    0.23    0.50
  -4   0  -9    0.21    0.69
  -4   0  -9    0.18    0.51
  -6  -2  -6  137.69    1.90
  -6   2  -6  136.12    2.10
  -6   2  -6  141.07    1.98
  -6  -2  -6  140.08    2.82
   1  -2 -11    3.48    1.52
   1   2 -11    2.84    0.64
  -1   2  11    3.87    0.75
   1  -2 -11    2.53    0.68
   1   2 -11    2.72    0.60
   1   2 -11    3.74    0.60
  -1   0 -11   -0.37    0.86
  -1   0 -11   -0.45    0.67
  -1   0 -11    0.12    0.54
  -1   0 -11    0.47    0.38
   9   2  -3  540.54    6.31
  -9   2   3  549.47    4.07
   9   2  -3  547.50    3.75
   9   2  -3  535.78    4.56
   9  -2  -3  548.28    4.26
   9  -2  -3  532.73    3.38
   0   6   0  550.13    4.38
   0   6   0  538.60    3.26
   0   6   0  536.25    5.47
   6  -2 -10 2470.66    8.23
   6   2 -10 2427.47    9.03
   6  -2 -10 2474.71   12.46
  -6   2  10 2432.37   10.28
   7   4  -4 1316.93   10.08
   7   4  -4 1326.09    6.48
   7   4  -4 1325.98    6.85
  -7   4   4 1314.13    7.87
  -7   4   4 1308.76    9.84
  -7   4   4 1317.73    7.13
   7   3   3 1725.89   12.43
  -7  -3  -3 1709.69    9.41
  -7   3  -3 1698.67    8.04
  -7   3  -3 1716.29    9.61
   4   3 -10 1059.01    5.88
   4   3 -10 1046.76    5.22
   4   3 -10 1060.39    5.84
   4  -3 -10 1067.73    8.79
  -8   3   0  166.35    3.21
   8   3   0  163.77    4.17
  -8  -3   0  155.51    2.58
  -8   3   0  151.54    2.32
  -8  -3   0  163.10    2.18
   9  -2  -2 1206.61    5.11
  -9  -2   2 1228.50    6.05
  -9   2   2 1214.16    6.15
   9   2  -2 1209.97    9.38
  -9   2   2 1222.61    7.02
  -9  -2   2 1207.19    6.84
   9   2  -4   90.57    1.91
   9  -2  -4   96.37    1.49
   9  -2  -4   94.35    1.86
  -9   2   4  100.70    2.01
   9   2  -4   97.90    1.66
  -9   2   4   96.02    1.76
   9   2  -4   91.95    2.80
   0   6   1  464.19    2.87
   0   6  -1  481.06    3.15
   0   6   1  464.17    4.04
   0   6  -1  469.92    5.19
   0   6  -1  451.61    3.80
   0   6  -1  460.52    3.94
   0   6   1  456.42    5.02
   0   6   1  451.33    3.98
   4   2 -11   80.76    1.45
   4   2 -11   80.11    1.68
   4   2 -11   80.97    1.73
   4  -2 -11   75.99    1.52
  -9   0  -1    0.00    0.42
   9   0   1    0.40    1.08
  -9   0  -1    0.45    0.73
   5   5  -4  318.78    4.04
   5   5  -4  322.30    3.20
   5  -5  -4  322.51    2.70
  -5   5   4  324.49    3.15
  -5   5   4  326.21    4.85
  -5   5   4  311.85    3.28
  -5   5   4  316.47    3.68
  -1   6   0  908.13    7.57
   1   6   0  929.31    5.63
  -1   6   0  913.44    4.32
  -1   6   0  921.47    4.94
  -2   3  -9   45.97    1.34
  -2  -3  -9   48.06    2.35
  -2  -3  -9   51.46    1.33
  -2   3  -9   49.95    1.34
   8   0  -9   -0.26    0.75
   8   0  -9   -0.04    0.56
   9   0  -7    0.13    0.67
   9   0  -7    0.04    0.57
   9   0  -7    0.25    0.57
  -4   5  -3  590.07    6.30
  -4   5  -3  580.31    3.61
   4  -5   3  580.42    3.47
  -4  -5  -3  570.23    3.67
  -4   5  -3  586.97    4.50
   4   5   3  581.70    6.56
   4   5   3  560.45    4.73
  -4   5  -3  561.68    3.85
  -4  -5  -3  600.57    5.71
   4   5   3  571.87    3.97
  -4   5  -3  589.00    4.38
   1   5   6   10.18    0.90
  -1   5  -6    9.41    0.68
  -1   5  -6    7.97    0.86
  -1   5  -6    9.08    0.86
   1   5   6    9.53    0.94
   1   5   6    7.18    1.17
  -1   5  -6    9.41    0.68
  -1  -5  -6   10.23    1.44
   1   6  -1  132.52    2.08
  -1   6   1  129.33    2.05
  -1   6   1  131.66    1.53
  -1   6   1  130.19    2.92
   1   6  -1  129.78    2.23
   1   6  -1  129.13    1.69
  -6   0  -7   -0.10    0.80
  -6   0  -7    0.22    0.59
  -6   0  -7    0.49    0.51
  -5  -1  -8  273.15    2.81
  -5  -1  -8  268.59    3.86
  -5   1  -8  265.33    2.78
  -5   1  -8  270.83    2.84
  -5  -1  -8  268.17    2.70
  -5   1  -8  264.31    2.45
  -5   1  -8  272.69    2.86
   0  -3 -10  947.57    5.37
   0   3 -10  948.99    5.35
   0   3 -10  930.77    4.93
   0  -3 -10  926.16    8.67
   0   3  10  950.57    5.98
  -6  -3  -5  548.08    5.48
  -6   3  -5  534.04    4.10
   6   3   5  538.36    6.65
  -6   3  -5  526.66    4.30
  -6  -3  -5  549.77    4.04
   7   1 -10   53.12    1.46
   7   1 -10   54.14    1.49
   7  -1 -10   56.58    1.26
   7  -1 -10   55.45    1.38
   6   0 -11    0.47    0.49
   6   0 -11    0.11    0.65
   6   0 -11    0.37    0.81
  -5   5  -1  158.53    1.92
   5   5   1  159.80    3.76
  -5   5  -1  154.78    1.83
   5  -5   1  152.26    1.82
  -5  -5  -1  148.71    1.88
  -5   5  -1  146.44    2.33
  -5   5  -1  146.32    2.15
   5   5   1  152.74    2.23
   7   4   0 1873.71   13.64
  -7  -4   0 1970.83    7.78
  -7  -4   0 1819.68    9.01
   7   4   0 1997.78    8.11
  -7   4   0 1967.52   12.24
   7  -4   0 1923.68    6.71
  -7   4   0 1974.64    8.86
  -4   1  -9  137.66    1.91
  -4   1  -9  128.51    2.03
  -4  -1  -9  134.36    2.04
  -4   1  -9  130.44    1.81
  -4  -1  -9  133.19    2.93
  -4   1  -9  135.99    2.12
   2   4  -9  163.49    2.05
   2   4  -9  160.74    1.88
  -2   4   9  157.95    2.89
  -2   4   9  162.07    2.41
   2  -4  -9  161.87    3.79
   2   4  -9  157.39    1.94
   2   4  -9  156.60    1.91
  -6   3   9   71.64    1.75
   6   3  -9   80.97    1.66
  -6   3   9   80.63    1.88
   6  -3  -9   88.19    1.39
   6   3  -9   74.66    1.68
   6  -3  -9   81.74    2.32
  -1   6  -1   39.92    1.92
   1   6   1   42.42    1.68
  -1   6  -1   41.00    1.00
   1   6   1   41.54    1.33
  -1   6  -1   38.72    1.14
   1   6   1   42.01    1.53
  -1  -1 -11 1874.06   11.62
  -1   1 -11 1886.82    8.15
  -1  -1 -11 1903.09    8.28
  -1  -1 -11 1914.81    7.97
  -3   0 -10 5085.40   14.01
  -3   0 -10 5032.70   14.76
   5  -4  -8   71.79    2.20
   5   4  -8   66.45    1.47
  -5   4   8   69.36    1.68
   5   4  -8   69.77    1.65
  -5   4   8   72.10    2.17
   5  -4  -8   69.83    1.25
  -5   4   8   74.08    1.86
   5   4  -8   70.20    1.57
  -9  -2   1  250.37    2.60
  -9   2   1  249.16    3.21
  -9  -2   1  251.17    3.18
  -2   2 -10  138.20    2.18
  -2   2 -10  132.15    2.18
  -2   2 -10  136.62    2.03
  -2  -2 -10  144.38    2.16
  -2   2 -10  142.10    1.82
  -2   2 -10  143.40    1.67
  -2  -2 -10  139.96    3.41
  -6  -4  -3  367.28    3.20
  -6   4  -3  364.68    3.66
  -6   4  -3  357.97    2.85
  -6   4  -3  354.80    3.13
  -6   4  -3  363.27    3.06
   6   4   3  358.34    5.85
   0   6  -2   97.31    1.72
   0   6  -2   99.36    1.89
   0   6   2   96.39    1.93
   0   6  -2   97.53    1.49
   0   6  -2   99.84    1.70
   0   6   2   96.01    1.92
   0   6   2   99.50    2.43
   9   2  -5   21.82    1.07
  -9   2   5   23.96    1.14
   9  -2  -5   21.91    1.05
   9  -2  -5   20.31    0.86
  -9   2   5   22.18    0.97
   9   2  -5   20.65    1.57
   9   2  -5   21.22    0.93
   9   2  -5   23.44    0.98
   3   0 -12 3464.90   14.01
   3   0 -12 3622.73   12.16
   1   6  -2 1785.26    6.76
   1   6  -2 1799.49    7.97
  -1   6   2 1796.44    7.75
  -1   6   2 1773.15   10.43
  -1   6   2 1767.83    8.30
  -4   4  -6   80.88    1.36
  -4   4  -6   88.53    1.75
  -4   4  -6   84.00    2.05
  -4  -4  -6   86.32    2.55
   4   4   6   82.60    2.39
  -4   4  -6   80.31    1.60
  -4  -4  -6   81.78    1.55
  -6   4   7  226.35    3.16
   6  -4  -7  223.70    3.22
  -6   4   7  226.27    3.71
   6  -4  -7  223.50    2.25
   6   4  -7  228.56    2.82
   6   4  -7  226.91    2.73
   2   0 -12 1372.98    6.94
   2   0 -12 1383.58    6.79
  -8   2   8  165.08    2.54
  -8   2   8  161.36    2.34
   8   2  -8  161.32    2.28
   8  -2  -8  161.56    2.73
   8   2  -8  156.64    2.43
   8   2  -8  162.32    2.35
   8   2  -8  161.78    2.23
   1   4  -9    1.11    0.58
   1   4  -9    0.84    0.57
   1   4  -9    1.17    0.43
   1  -4  -9    1.63    1.64
  -1   4   9    0.93    0.78
  -1   4   9    1.38    0.86
   1   4  -9    1.09    0.49
  -3  -4  -7  176.01    2.17
  -3   4  -7  170.87    2.42
  -3   4  -7  162.34    1.80
  -3   4  -7  163.67    2.36
  -3   4  -7  170.14    2.41
  -3   4  -7  170.61    2.27
   3   4   7  170.54    2.39
  -3  -4  -7  175.56    3.62
   7  -3  -8    1.56    0.90
   7   3  -8    0.85    0.67
   7   3  -8    0.94    0.80
  -7   3   8    0.67    0.81
   7  -3  -8    1.31    0.58
  -7   3   8    1.37    0.75
  -3   4   9 1662.82    9.31
   3  -4  -9 1623.52   10.89
   3   4  -9 1674.85    6.11
   3   4  -9 1670.06    7.09
   3   4  -9 1676.91    6.33
   3   4  -9 1612.05    6.77
  -3   4   9 1689.42    7.80
  -3   4   9 1710.63    7.78
   3   4  -9 1692.91    7.01
  -7   4   5 2277.04   12.90
   7  -4  -5 2244.25    8.03
   7   4  -5 2274.33    9.05
  -7   4   5 2255.01    9.59
   7   4  -5 2266.04    9.26
   7   4  -5 2218.80   12.38
  -7   4   5 2246.04   10.68
   9  -1   1  226.77    3.47
  -9  -1  -1  241.93    3.10
  -9  -1  -1  223.71    2.37
  -9   1  -1  239.87    2.69
   9   1   1  232.03    4.06
  -9   1  -1  232.55    2.73
  -4   5   6  159.25    2.31
   4   5  -6  154.40    2.25
   4  -5  -6  164.50    1.89
  -4   5   6  154.65    2.55
  -4   5   6  159.66    3.28
  -4   5   6  160.49    2.36
   8   3  -6  596.27    4.35
   8  -3  -6  598.73    3.66
  -8   3   6  611.41    5.09
   8  -3  -6  614.48    4.71
   8   3  -6  614.95    4.22
   8   3  -6  627.20    4.42
  -8   3   6  611.31    4.55
   8  -1  -9   68.60    1.43
   8   1  -9   77.18    1.71
   8   1  -9   73.18    1.70
   8  -1  -9   73.10    1.50
   8   1  -9   77.89    1.74
   8  -1  -9   77.35    1.95
  -8   1   9   73.91    1.55
   9  -1  -7  123.64    1.82
   9   1  -7  124.83    2.17
   9   1  -7  117.09    2.07
   9   1  -7  119.31    1.92
   9   1  -7  122.64    1.97
   9  -1  -7  121.14    2.26
   8   0   4  410.24    4.95
  -8   0  -4  381.06    3.21
  -8   0  -4  387.42    2.96
  -8   0  -4  408.83    3.95
   0  -2 -11  309.17    3.12
   0   2  11  317.98    3.49
   0  -2 -11  313.36    5.03
  -6  -1  -7  410.66    3.42
  -6   1  -7  404.59    3.38
  -6  -1  -7  406.18    3.28
  -6   1  -7  389.90    3.48
  -6  -1  -7  394.59    4.44
  -6   1  -7  408.49    3.44
  -2   6   1  179.17    2.58
  -2   6   1  178.99    3.60
   2   6  -1  179.74    2.79
  -2   6   1  179.17    1.78
   2   6  -1  168.01    2.25
   2   6  -1  189.96    2.03
  -2   6   1  178.82    2.02
   2   6   0   33.56    0.92
  -2   6   0   32.80    1.98
  -2   6   0   34.25    1.01
   2   6   0   32.74    1.11
  -2   6   0   31.60    0.85
  -2   6   0   33.37    1.29
  -2   5   7  701.70    5.14
  -2   5   7  713.53    4.47
  -2   5   7  733.19    6.39
   2  -5  -7  698.18    3.62
  -2   5   7  717.19    5.19
   2  -5  -7  716.77    6.75
   2   5  -7  710.85    4.07
   2   5  -7  716.98    4.20
   2   5  -7  710.48    4.30
   2   5  -7  723.69    4.35
   2   5  -7  708.48    4.59
   1  -5  -7  570.80    6.37
   1   5  -7  571.26    4.08
   1   5  -7  567.23    3.92
   1   5  -7  567.50    3.97
  -1   5   7  570.38    4.58
  -1   5   7  569.90    4.62
   6  -1 -11   41.91    1.05
   6   1 -11   42.98    1.39
   6  -1 -11   39.91    1.72
   6   1 -11   40.66    1.26
   6   1 -11   39.52    1.12
   6  -1 -11   44.99    1.29
   1   6   2  158.51    2.65
   1   6   2  158.03    2.39
  -1   6  -2  159.56    3.25
  -1   6  -2  161.86    2.08
   1   6   2  149.58    2.88
  -1   6  -2  150.54    1.82
   4   0 -12  194.53    3.05
   4   0 -12  192.71    2.61
  -8   3  -1 1497.78    9.10
  -8  -3  -1 1536.87    6.92
   8   3   1 1538.62   11.83
  -8  -3  -1 1481.73    7.99
  -8   3  -1 1507.78    7.35
   5   5  -5    0.48    0.80
   5   5  -5    0.11    0.71
  -5   5   5    0.71    0.61
   5   5  -5    0.22    0.76
  -5   5   5    0.54    1.33
  -5   5   5    1.63    0.66
  -5   5   5    0.37    0.77
  -3  -1 -10  500.70    3.58
  -3  -1 -10  521.62    3.63
  -3   1 -10  539.12    4.05
  -3   1 -10  525.70    3.77
  -3   1 -10  528.98    3.50
  -3  -1 -10  512.86    5.72
  -3  -1 -10  511.14    3.95
  -3   1 -10  544.27    4.35
   2   6  -2  514.71    4.21
   2   6  -2  517.32    4.33
  -2   6   2  516.15    4.35
   2   6  -2  514.98    3.90
  -2   6   2  526.38    5.88
   2   6  -2  513.73    3.84
   5   2 -11  156.81    2.36
   5   2 -11  162.80    2.03
  -5   2  11  158.19    2.40
   5   2 -11  162.96    2.39
   8   2   3  245.62    4.60
  -8   2  -3  235.78    3.02
  -8  -2  -3  242.89    2.63
  -8   2  -3  241.78    2.69
  -5   4  -5  114.33    2.43
   5   4   5  106.93    3.17
  -5  -4  -5  104.92    2.62
  -5  -4  -5  112.53    1.80
   5   4   5  100.26    1.62
  -5   4  -5  107.91    1.88
  -5   4  -5  109.16    1.59
  -5   4  -5  107.90    1.79
  -5   4  -5  105.31    1.99
   1   0 -12   -0.09    0.58
   1   0 -12    0.08    0.85
   3  -1 -12 1310.88    6.71
   3   1 -12 1318.74    6.40
  -7  -2  -5  537.43    3.98
  -7   2  -5  539.27    4.07
  -7  -2  -5  545.22    3.66
   7   2   5  535.29    6.48
  -5   3  10  100.94    2.07
   5   3 -10  102.16    1.76
   5   3 -10   96.27    1.80
   5  -3 -10  105.44    2.82
   5  -3 -10   93.23    1.35
   5   3 -10  100.39    1.94
  -2   1  12   10.34    0.80
   2   1 -12    9.13    0.77
   2   1 -12   11.14    0.82
   2  -1 -12   10.90    1.42
   2   1 -12    9.33    0.87
   2  -1 -12   11.76    0.87
   2   6   1  255.45    2.83
  -2   6  -1  262.85    2.99
  -2   6  -1  255.43    2.25
  -2   6  -1  257.18    4.25
  -2   6  -1  266.73    2.57
   2   6   1  262.21    3.47
   2   6   1  251.75    3.39
  -2  -4  -8  921.06    8.22
   2   4   8  927.34    5.92
  -2   4  -8  946.75    5.54
  -2   4  -8  945.64    4.31
  -2  -4  -8  960.70    5.16
  -1   6   3   45.82    1.50
  -1   6   3   48.32    2.02
   1   6  -3   46.77    1.18
   1  -6  -3   46.44    1.19
   1   6  -3   49.77    1.26
  -1   6   3   48.88    1.33
   1   6  -3   47.25    1.29
  -7  -4  -1  323.08    3.84
   7   4   1  341.72    5.94
  -7  -4  -1  331.06    3.04
   7   4   1  347.93    3.12
  -7   4  -1  336.07    4.90
  -7   4  -1  328.53    3.51
   9   2   0 1205.00    9.54
  -9  -2   0 1159.59    5.49
  -9   2   0 1187.15    5.72
  -9   2   0 1193.31    6.58
  -9  -2   0 1175.13    6.82
   0  -4  -9   21.80    1.97
   0   4  -9   22.30    0.72
   0   4  -9   22.92    0.92
   0  -4  -9   22.38    0.87
   0   4  -9   23.81    1.02
   0   4   9   22.45    1.18
   0   6  -3   93.69    1.82
   0   6   3   99.46    1.91
   0   6  -3   95.14    1.67
   0   6  -3   96.10    1.50
   0   6   3   98.68    2.52
  -7   0  -6  383.19    4.00
  -7   0  -6  372.62    2.98
  -8  -1  -4  102.65    1.68
   8  -1   4  102.30    2.32
  -8  -1  -4  101.82    1.62
  -8  -1  -4  106.85    2.26
  -8   1  -4  100.37    1.84
   8   1   4  101.19    2.83
  -3   5  -5    1.82    0.65
  -3   5  -5    1.67    0.92
  -3  -5  -5    1.41    1.21
  -3   5  -5    1.78    0.73
   3   5   5    1.32    1.01
  -3   5  -5    1.60    0.61
   3   5   5    1.98    0.68
  -9   2   6  424.30    3.60
   9   2  -6  401.78    3.46
   9   2  -6  408.08    3.73
   9  -2  -6  425.60    3.19
   9  -2  -6  412.33    3.88
   9   2  -6  426.18    3.53
  -9   2   6  423.04    4.07
   9   2  -6  424.71    5.18
  -3   5   7  712.96    5.36
   3   5  -7  702.79    4.24
  -3   5   7  696.56    5.02
   3   5  -7  701.28    4.44
   3  -5  -7  682.34    3.68
   3  -5  -7  706.13    6.31
  -3   5   7  694.80    4.64
   3   5  -7  704.28    4.11
   3   5  -7  702.68    4.65
  -3   5   7  680.06    6.29
   5   5   2  589.84    6.96
  -5  -5  -2  607.83    5.44
  -5  -5  -2  580.88    3.80
  -5   5  -2  605.45    6.60
   5  -5   2  622.32    3.54
  -5   5  -2  608.96    3.86
  -5   5  -2  590.24    3.62
  -5   5  -2  607.72    4.59
  -5   5  -2  582.51    4.30
   0   5  -7 1206.13    5.35
   0   5  -7 1200.42    5.58
   0   5  -7 1247.26    6.01
   0   5  -7 1216.03    6.23
   0   5   7 1223.09    6.95
   0   5   7 1169.92    8.04
   0  -5  -7 1213.13    9.50
   0   5   7 1228.24    6.68
   4   4  -9  248.22    2.55
   4   4  -9  252.41    2.59
  -4   4   9  248.80    3.56
   4   4  -9  245.52    2.18
   4   4  -9  237.31    2.65
  -4   4   9  251.16    2.79
   4  -4  -9  245.77    2.05
  -4   4   9  252.63    2.89
  -4   4   9  249.81    3.17
   4  -4  -9  241.66    4.07
  -9   0  -2 1817.09    6.75
  -9   0  -2 1816.05    8.57
  -2   5  -6    4.18    0.75
  -2   5  -6    3.99    0.62
   2   5   6    4.64    1.06
  -2   5  -6    4.09    0.81
   2   5   6    4.97    0.82
  -2  -5  -6    3.30    1.31
   2   5   6    4.18    0.79
  -2   5  -6    3.70    0.61
   4  -1 -12  521.13    5.55
   4  -1 -12  524.68    4.08
  -1  -3 -10  407.83    3.47
  -1   3 -10  416.88    3.60
  -1   3 -10  413.72    3.30
   9   0  -8  496.52    3.82
   9   0  -8  495.58    3.68
  -2   6   3  641.54    4.79
   2   6  -3  604.89    3.91
   2   6  -3  618.10    4.23
   2   6  -3  614.96    4.13
  -2   6   3  636.96    6.32
   2   6  -3  623.45    4.50
   2  -6  -3  626.62    3.86
   2   6  -3  649.10    4.76
  -7   4   6 1222.99    6.83
   7   4  -6 1208.07    6.55
   7   4  -6 1213.01    6.37
   7  -4  -6 1194.82    5.52
  -7   4   6 1211.97    7.45
  -7   4   6 1231.20    9.00
   1   1 -12  389.07    3.60
   1  -1 -12  396.55    3.63
   1  -1 -12  386.26    5.12
   1   1 -12  391.75    3.49
  -4   5  -4   91.89    1.81
   4   5   4   90.10    2.71
  -4   5  -4   90.58    1.62
  -4  -5  -4   89.14    2.45
   4   5   4   88.48    1.63
  -4   5  -4   92.84    2.51
  -4  -5  -4   91.14    1.51
  -4   5  -4   86.41    1.45
  -4   5  -4   89.14    1.81
   6   5  -2  129.45    1.94
   6   5  -2  130.59    3.40
  -6  -5   2  129.84    1.77
  -6   5   2  132.41    2.42
  -6   5   2  133.90    3.53
  -6   5   2  135.23    1.92
   6  -5  -2  133.17    1.77
   6   5  -2  128.87    2.16
  -2   0 -11    1.30    0.43
  -2   0 -11    0.10    0.64
  -2   0 -11   -0.06    0.87
  -2   0 -11    0.10    0.56
   7   3   4  517.72    6.73
  -7   3  -4  530.36    4.89
  -7  -3  -4  510.13    5.14
  -7  -3  -4  533.79    3.97
  -7   3  -4  521.92    4.24
  -4  -3  -8   28.68    1.07
  -4   3  -8   27.57    1.00
  -4   3  -8   28.15    1.07
  -4   3  -8   24.53    1.12
   4   3   8   27.48    1.12
  -4   3  -8   23.25    1.11
  -4  -3  -8   22.96    1.80
   1   6   3   19.38    1.09
   1   6   3   19.09    1.31
   1   6   3   19.50    1.14
  -1   6  -3   22.07    1.02
  -1   6  -3   16.89    1.27
   6  -5  -1    5.52    0.64
   6   5  -1    7.94    0.90
   6   5  -1    4.88    1.66
  -6  -5   1    6.88    0.60
  -6   5   1    5.21    1.66
  -6   5   1    5.92    0.66
  -6   5   1    5.82    0.85
  -7  -1  -6 1331.26    8.16
  -7  -1  -6 1351.99    6.33
  -7  -1  -6 1335.87    6.24
   6  -5  -3  618.64    3.84
  -6   5   3  608.30    4.68
   6   5  -3  630.34    4.36
   6   5  -3  614.82    6.39
  -6   5   3  602.14    6.91
   6   5  -3  635.70    4.61
  -6   5   3  619.06    4.09
  -6  -5   3  613.89    3.84
  -6   5   3  622.56    5.16
  10   0  -3   -0.12    0.73
 -10   0   3    0.36    0.39
  10   0  -3    0.09    1.05
   8   3  -7    1.87    0.75
  -8   3   7    1.07    0.75
   8  -3  -7    0.56    0.72
  -8   3   7    0.53    0.69
   8  -3  -7    0.56    0.56
   8   3  -7    1.62    0.54
   8   3  -7    1.00    0.76
  -2   6  -2  461.39    5.48
   2   6   2  451.85    4.54
   2   6   2  463.55    4.65
  -2   6  -2  471.23    3.14
  -2   6  -2  457.55    3.37
   2   6   2  462.16    3.84
  -2   6  -2  479.80    3.48
  -2   6  -2  457.35    4.01
   5   0 -12  757.52    5.08
   5   0 -12  698.94    5.55
   3   6  -1   21.99    1.12
   3   6  -1   23.26    1.36
  -3   6   1   22.84    1.84
  -3   6   1   22.68    0.74
  -3   6   1   22.81    1.09
   3   6  -1   21.22    0.87
   3  -6  -1   21.68    0.99
  -3   6   1   20.95    0.87
   3   6  -1   23.00    0.86
  -5  -3  -7  591.83    4.20
  -5   3  -7  588.06    4.18
  -5   3  -7  576.09    4.19
   5   3   7  589.87    4.13
  -5  -3  -7  571.84    5.94
  -5   3  -7  603.29    4.49
 -10   0   4   67.73    1.22
  10   0  -4   62.91    1.99
  10   0  -4   63.85    1.29
  10   0  -4   62.76    1.64
  -5   2  -8  138.30    2.12
  -5   2  -8  134.88    2.07
  -5   2  -8  139.03    2.08
  -5  -2  -8  134.75    2.95
  -5  -2  -8  131.95    1.91
   7   2 -10  688.28    4.72
   7   2 -10  681.46    4.81
  -7   2  10  681.93    4.71
  -7   2  10  706.79    4.98
   7   2 -10  693.89    4.37
   7  -2 -10  699.97    3.89
   7  -2 -10  697.05    5.83
  -3   6   0 4882.15   14.98
  -3   6   0 4930.16   13.21
  -3   6   0 4875.15   12.61
  -3   6   0 4910.89   20.05
   3  -6   0 4875.50   13.63
  -3   6   0 4881.39   14.08
   3   6   0 4848.62   13.92
   9  -1   2   20.95    1.41
   9   1   2   21.09    1.81
  -9   1  -2   26.10    1.01
  -9   1  -2   21.41    0.98
  -9  -1  -2   26.17    0.92
  -9  -1  -2   21.92    1.19
   3   6  -2 1503.18    5.82
  -3   6   2 1526.05    6.23
   3   6  -2 1590.38    6.83
  -3   6   2 1613.78   10.38
   3  -6  -2 1554.99    5.89
   3   6  -2 1573.86    7.86
   3   6  -2 1526.10    6.89
  -3   6   2 1649.07    7.34
   3   6  -2 1587.48    5.89
  -4  -2  -9   97.34    2.70
   4   2   9   96.47    1.89
  -4   2  -9   90.93    1.56
  -4   2  -9   97.01    1.80
  -4   2  -9   91.98    1.82
  -4  -2  -9   91.45    1.77
   0   0 -12   64.03    1.49
   0   0 -12   74.72    1.62
  10   0  -2  183.98    2.66
 -10   0   2  185.90    1.91
  -1   2 -11   12.76    0.92
   1   2  11   14.92    1.10
  -1   2 -11   14.75    0.75
  -1  -2 -11   16.61    0.98
  -1  -2 -11   15.00    1.81
  -1   2 -11   15.47    0.98
   9  -1  -8  947.69    5.06
   9  -1  -8  927.92    6.21
   9   1  -8  925.74    5.82
   9   1  -8  933.70    5.41
   9   1  -8  946.45    5.69
   9   1  -8  961.56    5.37
   5   5  -6   16.51    1.05
   5   5  -6   15.87    1.04
  -5   5   6   16.25    1.12
  -5   5   6   17.05    1.59
  -5   5   6   18.88    0.93
   5  -5  -6   16.10    0.77
  -5   5   6   16.79    0.93
   1  -6  -4  933.92    4.60
   1   6  -4  925.67    5.29
  -1   6   4  931.18    7.56
   1   6  -4  986.93    5.37
  -1   6   4  924.00    5.17
  -1   6   4  995.44    6.15
   1   6  -4  939.45    5.25
  -6  -4  -4  101.16    1.73
  -6  -4  -4   96.47    2.45
   6   4   4   87.75    3.13
  -6   4  -4   84.24    2.30
  -6   4  -4  100.09    1.73
  -6   4  -4  100.34    1.98
  -6   4  -4  100.36    1.72
  -2   3  11  733.22    5.01
   2   3 -11  738.21    4.48
   2   3 -11  710.85    4.35
   2   3 -11  724.25    4.29
   2  -3 -11  751.90    7.91
   2  -3 -11  725.36    4.56
  -2   3  11  738.92    5.57
  -3   3  -9  649.22    4.63
  -3  -3  -9  609.84    4.28
  -3   3  -9  628.46    3.90
  -3   3  -9  647.05    4.40
  -3   3  -9  645.13    4.51
   3   3   9  627.96    4.74
  -8   3  -2  185.68    3.06
  -8  -3  -2  193.02    2.37
  -8  -3  -2  190.15    2.99
   8   3   2  184.38    4.36
  -8   3  -2  191.26    2.57
   6  -4  -8  217.91    2.20
  -6   4   8  227.12    3.62
   6  -4  -8  226.85    3.29
  -6   4   8  230.26    3.15
   6   4  -8  217.46    2.63
   4   5  -7    6.39    0.79
   4   5  -7    7.23    0.65
   4   5  -7    6.78    0.64
  -4   5   7    6.95    0.86
  -4   5   7    5.95    0.76
   4  -5  -7    7.55    0.60
  -4   5   7    7.31    0.76
  -4   5   7    8.38    1.30
  -2   1 -11 1153.57    6.17
  -2  -1 -11 1161.66    5.89
  -2   1 -11 1148.19    4.97
  -2   1 -11 1149.16    6.57
  -2  -1 -11 1162.77    8.82
   7   0 -11    0.21    0.73
   7   0 -11    0.40    0.64
   7   0 -11    0.61    0.57
   8   0 -10   23.66    0.96
   8   0 -10   23.03    1.00
   8   0 -10   24.22    1.22
  10   0  -5    0.22    0.88
  10   0  -5    0.48    0.54
  10   0  -5    0.20    0.77
  -1   5  -7  500.01    3.20
  -1  -5  -7  506.79    6.00
  -1   5  -7  505.38    4.05
  -1   5  -7  490.59    3.61
   6  -5   0  959.25    4.58
  -6   5   0  941.87    4.61
  -6   5   0  956.10    5.25
   6   5   0  952.46    5.65
  -6   5   0  938.24    8.54
   3  -3 -11    5.05    0.61
  -3   3  11    4.33    0.64
   3   3 -11    4.28    0.61
   3   3 -11    4.71    0.54
   3   3 -11    4.84    0.66
   3  -3 -11    6.09    1.51
   6   5  -4 1241.29    8.26
   6   5  -4 1272.52    6.40
  -6   5   4 1288.15    7.58
  -6   5   4 1292.08    9.94
  -6  -5   4 1240.26    5.64
   6   5  -4 1287.72    6.79
  -6   5   4 1286.64    6.93
   6  -5  -4 1306.96    5.76
  -9  -2  -1 1323.74    6.15
  -9   2  -1 1295.45    6.93
  -9  -2  -1 1272.70    7.46
  -9   2  -1 1289.22    6.26
   9   2   1 1250.02   10.20
   0   6  -4  283.04    2.57
   0   6  -4  293.61    3.03
   0   6  -4  297.38    2.86
   0   6   4  300.00    4.11
   0  -6  -4  285.78    2.39
   0   6   4  297.17    3.05
   8   2  -9  614.19    4.25
   8   2  -9  613.78    4.65
   8  -2  -9  607.49    5.22
  -8   2   9  612.17    4.57
   8   2  -9  614.46    4.56
   8  -2  -9  624.75    3.94
   9   2  -7   37.45    1.23
   9   2  -7   33.63    1.19
  -9   2   7   36.68    1.16
   9   2  -7   33.89    1.18
   9   2  -7   35.65    1.35
   9  -2  -7   35.13    1.10
  -9   2   7   36.29    1.30
   9  -2  -7   35.76    1.34
  -7   4  -2   10.68    1.49
  -7   4  -2    8.43    0.83
  -7  -4  -2    6.84    1.07
   7   4   2    7.28    1.94
  -7  -4  -2    8.77    0.73
  10  -1  -3  443.14    3.96
  10   1  -3  457.54    5.40
 -10  -1   3  484.87    3.40
  10  -1  -3  474.39    4.83
  10   1  -3  437.58    4.25
  10  -1  -3  472.72    3.16
  -1  -4  -9   57.49    1.29
  -1   4  -9   55.46    1.02
  -1   4  -9   58.13    1.38
  -1   4  -9   56.36    1.38
  -1   4  -9   54.66    1.44
   5  -1 -12  146.00    2.90
   5   1 -12  154.71    2.34
   5  -1 -12  150.11    2.21
  -6   2  -7  136.95    1.97
  -6   2  -7  134.15    2.08
  -6  -2  -7  137.81    2.83
  -6  -2  -7  128.99    1.85
  10  -1  -4  105.55    2.01
  10   1  -4  104.97    2.07
  10   1  -4  111.52    1.70
  10  -1  -4  105.18    2.36
  10   1  -4  105.78    2.75
  10  -1  -4  112.05    1.62
  -3   6  -1    2.65    1.24
   3  -6   1    2.28    0.71
   3   6   1    2.96    0.58
   3   6   1    2.68    1.09
  -3   6  -1    3.04    0.75
  -3   6  -1    2.49    0.56
  -3   6  -1    2.51    0.58
  -3   6  -1    1.70    0.55
   2   6  -4    2.39    0.63
   2  -6  -4    3.29    0.62
   2   6  -4    2.18    0.62
   2   6  -4    3.54    0.60
   2   6  -4    1.60    0.84
  -2   6   4    2.91    0.62
   2   6  -4    2.58    0.74
   2   6  -4    2.94    0.58
  -2   6   4    2.58    0.81
   3   6  -3    1.49    0.54
  -3   6   3    1.94    0.53
   3   6  -3    2.60    0.51
   3   6  -3    2.16    0.71
  -3   6   3    1.67    0.78
   3   6  -3    3.24    0.75
  -3   6   3    2.30    0.60
   3   6  -3    2.18    0.85
   7   3  -9  173.64    2.47
   7   3  -9  180.12    2.48
  -7   3   9  180.30    2.55
  -7   3   9  187.32    2.77
   7   3  -9  178.13    2.40
   7  -3  -9  173.76    3.00
   7  -3  -9  184.36    2.03
  -6   2  11    9.97    0.80
   6   2 -11    8.10    0.95
   6  -2 -11    7.56    1.27
   6  -2 -11    7.79    0.60
   6  -2 -11    7.69    0.66
   6   2 -11    7.66    0.74
  -5   4   9   20.42    1.20
   5   4  -9   22.35    1.09
   5   4  -9   18.88    0.97
   5   4  -9   17.69    0.71
   5   4  -9   18.70    0.91
  -5   4   9   19.76    1.06
  -5   4   9   18.90    1.34
   5  -4  -9   21.90    1.54
   5  -4  -9   17.70    0.72
   5   5   3   58.75    2.44
  -5  -5  -3   55.78    1.94
  -5   5  -3   52.18    1.45
  -5   5  -3   54.26    2.15
  -5   5  -3   49.59    1.37
  -5   5  -3   52.44    1.25
  -5  -5  -3   50.72    1.19
   5   5   3   53.13    1.48
  -5   5  -3   49.69    1.21
  -6   3  -6    1.20    0.81
  -6   3  -6    1.67    0.56
  -6  -3  -6    0.86    0.68
  -6   3  -6    0.38    0.64
   6   3   6    1.10    1.32
  -6  -3  -6    1.03    1.22
   0   1 -12  228.96    2.63
   0  -1 -12  231.54    2.59
   0   1 -12  220.87    2.78
   0   1 -12  226.30    2.70
   0  -1 -12  235.73    2.78
   0  -1 -12  228.52    4.08
   1   3 -11   96.02    1.45
   1  -3 -11   95.12    1.69
   1   3 -11   98.60    1.56
  -1   3  11   95.46    1.91
   1   3 -11   95.48    1.69
   1   3 -11   96.03    1.64
 -10   0   1    0.20    0.74
 -10   0   1    0.50    0.33
  10   0  -1    0.90    1.18
  10  -1  -2    5.73    0.76
 -10  -1   2    4.15    0.56
  10   1  -2    2.58    1.34
 -10  -1   2    2.50    0.84
  -9   3   3  155.65    2.30
  -9  -3   3  161.51    2.15
   9   3  -3  158.04    3.77
  -9  -3   3  165.61    2.49
  -9   3   3  169.09    2.64
  -9   3   3  153.17    2.86
   9   3  -3  156.67    2.07
   9  -3  -3  150.83    1.78
   9   3  -3  165.71    2.14
   6  -3 -10   21.91    1.52
   6   3 -10   22.43    0.99
  -6   3  10   22.11    1.20
   6  -3 -10   20.95    0.77
  -6   3  10   19.71    1.09
   6   3 -10   21.12    1.00
   6   3 -10   23.70    1.14
  -3  -2 -10   10.02    1.53
  -3   2 -10    9.60    0.61
  -3   2 -10    9.22    0.81
   3   2  10    8.70    0.92
  -3  -2 -10    8.99    0.83
  -3   2 -10   10.10    0.89
   3   2 -12  452.19    3.55
  -3   2  12  434.74    3.58
   3  -2 -12  429.73    5.44
   3   2 -12  434.08    3.66
   3   2 -12  415.65    3.28
   3  -2 -12  435.29    3.59
   2   2 -12   50.74    1.29
   2   2 -12   52.18    1.31
  -2   2  12   53.64    1.42
   2   2 -12   54.03    1.37
   2  -2 -12   52.02    2.33
   2  -2 -12   55.96    1.37
  -9  -3   2 1192.86    5.90
   9  -3  -2 1179.88    5.03
  -9   3   2 1202.21    7.72
   9   3  -2 1192.84   10.24
  -9  -3   2 1192.58    6.84
   7   1 -11    8.66    0.73
   7   1 -11    7.78    0.88
   7  -1 -11    8.42    1.11
   7  -1 -11    7.27    0.70
   7  -1 -11    7.64    0.65
   7   1 -11    8.65    0.73
   8   1 -10   40.03    1.23
   8   1 -10   37.16    1.26
   8   1 -10   34.66    1.26
   8  -1 -10   36.52    1.08
   8  -1 -10   38.30    1.13
  -8   1  10   33.27    1.13
   8   1 -10   31.84    1.15
   9   3  -4  339.75    3.07
   9  -3  -4  338.03    2.72
  -9  -3   4  342.79    3.48
  -9   3   4  341.82    3.76
  -9   3   4  339.48    3.34
  10   1  -5   45.38    1.22
  10   1  -5   44.64    1.88
  10  -1  -5   48.12    1.49
  10  -1  -5   46.87    1.64
  -4   3  11  234.04    3.00
  -4   3  11  228.53    2.50
   4   3 -11  221.88    2.14
   4  -3 -11  227.95    4.08
   4   3 -11  219.15    2.53
   4   3 -11  213.40    2.46
   2   6   3  146.70    2.20
  -2   6  -3  150.64    1.98
  -2   6  -3  140.69    2.94
   2   6   3  146.13    2.67
  -2   6  -3  147.67    1.91
  -2   6  -3  144.70    2.26
   2   6   3  150.87    2.63
  -2   6  -3  151.20    1.80
  -8   4   3  659.00    4.86
   8   4  -3  666.97    4.23
   8  -4  -3  652.79    3.83
   8   4  -3  668.32    7.57
  -8   4   3  699.48    6.86
  -8   4   3  654.26    5.43
  -8  -4   3  654.39    4.79
  -8  -4   3  662.26    4.33
   8   4  -3  687.41    4.62
  -5   0  -9    0.12    0.51
  -5   0  -9   -0.14    0.54
  -8   4   2  193.52    2.63
  -8  -4   2  200.74    2.34
   8   4  -2  200.61    4.46
  -8   4   2  202.14    2.88
   8  -4  -2  198.71    2.03
   8   4  -2  201.63    2.46
  -7   4   7  172.38    2.80
  -7   4   7  178.33    2.60
  -7   4   7  175.01    3.40
   7   4  -7  174.82    2.39
   7  -4  -7  181.55    2.63
   7   4  -7  176.31    2.46
  -8   0  -5    0.21    0.55
   8   0   5    0.95    1.06
  -8   0  -5   -0.01    0.71
  -8   0  -5    0.08    0.41
  -8   2  -4  736.27    4.64
  -8  -2  -4  754.06    4.16
   8   2   4  733.51    7.71
  -8  -2  -4  771.22    4.69
   8  -2   4  770.64    5.76
  -8   2  -4  748.31    5.14
  10   0  -6  304.32    3.44
  10   0  -6  302.77    3.79
  -4   4  -7 3306.82   11.13
  -4   4  -7 3330.00    9.64
  -4   4  -7 3278.34   11.55
  -4  -4  -7 3257.19   10.88
  -4  -4  -7 3287.18   15.37
  -2   5   8 1130.80    5.59
  -2   5   8 1078.78    7.74
   2  -5  -8 1074.53    8.38
  -2   5   8 1115.74    6.62
  -2   5   8 1100.96    6.45
   2   5  -8 1103.00    5.35
   2   5  -8 1098.47    5.54
   2   5  -8 1087.85    5.37
   1   6   4 3742.51   13.08
   1   6   4 3677.79   12.89
   1   6   4 3843.66   15.16
  -1  -6  -4 3750.20   10.18
  -1   6  -4 3823.32   11.78
  -1   6  -4 3743.58   12.49
  -1   6  -4 3687.89   10.87
   6  -5   1    0.78    0.47
  -6   5  -1    0.31    1.42
  -6   5  -1    0.48    0.50
  -6  -5  -1    0.56    0.51
   6   5   1    0.18    1.63
  -6   5  -1    0.50    0.59
  -1   5   8  290.55    3.28
   1   5  -8  306.02    2.51
   1   5  -8  313.51    2.89
   1   5  -8  314.08    2.88
  -1   5   8  322.93    4.12
  -1   5   8  299.82    3.37
   1  -5  -8  326.78    4.87
   6   5  -5  830.06    5.97
   6  -5  -5  803.02    4.42
  -6   5   5  835.01    5.95
   6   5  -5  797.93    5.06
   6   5  -5  832.62    5.33
  -6   5   5  834.97    5.37
  -6   5   5  831.61    7.76
   2   4 -10  375.20    2.83
  -2   4  10  351.53    4.20
  -2   4  10  360.61    3.27
   2   4 -10  361.25    2.86
  -2   4  10  376.77    3.60
   2  -4 -10  359.89    5.34
   2   4 -10  365.31    2.38
   2   4 -10  362.62    2.80
  -8   4   4  676.40    5.48
  -8   4   4  665.14    6.70
   8  -4  -4  659.23    3.90
  -8   4   4  662.65    4.91
   8   4  -4  658.40    4.36
   8   4  -4  648.22    7.01
   8   4  -4  665.03    4.61
  -6   0  -8  566.55    3.62
  -6   0  -8  579.97    3.97
  -4   0 -10 1650.61    6.81
  -4   0 -10 1644.92    7.02
  -9   0  -3    0.06    0.71
  -9   0  -3    0.33    0.36
  -9   0  -3    0.75    0.48
   9   0   3   -0.09    1.10
   4  -2 -12   82.47    2.56
   4   2 -12   80.50    1.63
  -4   2  12   83.94    1.80
   4   2 -12   85.38    1.70
   4  -2 -12   84.88    1.62
  10  -1  -1   94.79    2.32
 -10   1   1   94.91    1.75
 -10  -1   1   93.18    1.51
  -3   4  -8  137.37    1.62
   3   4   8  129.78    2.09
  -3  -4  -8  135.33    3.38
  -3  -4  -8  139.39    1.97
  -3   4  -8  136.85    1.85
  -3   4  -8  131.50    2.07
  -3   4  -8  139.99    2.18
   8  -4  -1  143.83    1.67
   8   4  -1  138.57    1.98
  -8  -4   1  138.06    2.38
  -8   4   1  136.62    2.21
  -8   4   1  138.37    3.20
  -8  -4   1  132.50    1.94
   6   0 -12   10.45    0.95
   6   0 -12    9.89    0.84
   6   0 -12    9.97    0.65
   3   6   2  141.15    2.44
  -3   6  -2  142.22    1.88
   3   6   2  134.08    1.96
  -3   6  -2  135.96    1.72
  -3   6  -2  139.40    3.20
  -3   6  -2  137.60    2.21
   3   6   2  137.18    2.74
   3  -6   2  134.17    1.84
  -3   6  -2  138.97    1.96
   3  -4 -10 1636.13   10.47
   3   4 -10 1713.45    6.00
   3   4 -10 1756.14    6.22
  -3   4  10 1709.53    8.20
   3   4 -10 1761.85    5.09
  -3   4  10 1718.94    7.17
  -3   4  10 1678.36    8.78
  -3   4  10 1742.32    7.18
   9   0  -9    0.33    0.66
   9   0  -9    0.16    0.60
   9   0  -9    0.09    0.76
   9   0  -9    0.32    0.66
  -9   3   1 2072.30    8.49
  -9  -3   1 2079.14    8.14
  -9   3   1 2093.05   10.15
  -9  -3   1 2102.60    9.55
   3   6  -4  172.80    2.15
   3  -6  -4  178.44    1.99
   3   6  -4  180.19    2.26
   3   6  -4  189.19    2.11
  -3   6   4  180.36    2.48
  -3   6   4  175.27    2.49
   3   6  -4  189.09    2.55
  -3   6   4  179.99    2.13
  -2  -3 -10  996.71    5.50
  -2   3 -10 1031.40    5.41
  -5   4  -6    7.63    0.95
  -5   4  -6    6.37    0.82
  -5   4  -6    6.27    0.84
  -5  -4  -6    6.79    0.70
  -5   4  -6    8.12    0.66
  -5   4  -6    7.32    0.78
  -5  -4  -6    5.48    1.30
   5   4   6    7.36    0.64
   5   4   6    9.22    1.30
  -3   5  -6  134.60    1.71
  -3   5  -6  138.04    2.08
   3   5   6  130.33    2.34
   3   5   6  135.82    2.14
  -3   5  -6  139.41    2.27
  -3   5  -6  143.97    2.04
  -3   5  -6  139.70    2.17
  -3  -5  -6  141.04    3.20
   9   3  -5  281.55    2.88
  -9   3   5  279.95    3.49
   9   3  -5  301.53    2.90
  -9   3   5  295.63    3.10
   9   3  -5  290.35    4.60
   9  -3  -5  287.16    2.94
   9  -3  -5  291.54    2.58
  -9  -3   5  300.03    3.13
   1  -2 -12    4.04    0.72
   1   2 -12    4.18    0.69
   1  -2 -12    3.73    1.55
  -1   2  12    3.21    0.79
   1   2 -12    2.95    0.59
   1   2 -12    4.32    0.65
   3   5  -8  713.11    4.30
   3   5  -8  685.38    3.88
  -3   5   8  694.91    4.56
  -3   5   8  682.62    4.91
  -3   5   8  699.22    5.21
   3  -5  -8  705.67    6.36
   3   5  -8  692.62    4.01
   3   5  -8  696.29    4.44
  -8   3   8   15.03    1.04
   8   3  -8   17.29    1.04
  -8   3   8   14.89    1.03
   8   3  -8   13.92    1.01
   8  -3  -8   13.41    1.02
   1   4 -10  156.02    1.97
   1  -4 -10  148.82    3.62
   1   4 -10  151.27    1.98
  -1   4  10  147.72    2.27
   1   4 -10  157.76    1.91
  -1   4  10  154.19    2.02
  -1   4  10  158.17    2.76
  -5  -1  -9   22.57    0.98
  -5   1  -9   23.93    1.10
  -5   1  -9   23.48    0.95
  -5  -1  -9   22.37    1.52
  -5   1  -9   20.76    0.90
  -4   6   1  298.42    2.29
   4   6  -1  309.19    4.01
  -4   6   1  308.08    4.93
  -4   6   1  298.95    3.13
   4   6  -1  296.54    2.52
  -4   6   1  300.20    2.93
   4   6  -1  290.59    3.05
  -4   6   1  277.02    2.83
   4  -6  -1  286.87    2.60
   4   5   5    1.22    1.03
  -4  -5  -5    0.60    0.47
  -4  -5  -5    1.02    1.17
  -4   5  -5    1.63    0.70
  -4   5  -5    0.83    0.85
  -4   5  -5    1.00    0.65
  -4   5  -5    1.14    0.69
   4   5   5    1.07    0.58
  -1   6   5  239.09    2.38
  -1   6   5  229.45    2.97
   1  -6  -5  234.75    2.05
  -1   6   5  216.29    3.69
   1   6  -5  214.83    2.46
   1   6  -5  232.04    2.54
   1   6  -5  222.80    2.22
   4   6  -2    4.25    0.58
  -4   6   2    5.32    0.74
   4   6  -2    5.32    0.80
   4  -6  -2    4.88    0.68
   4   6  -2    5.46    0.80
   4   6  -2    7.70    1.07
  -4   6   2    4.68    0.65
  -8  -1  -5  232.47    3.26
  -8   1  -5  232.67    2.65
  -8  -1  -5  231.82    2.34
  -8  -1  -5  227.19    2.39
   8  -1   5  234.77    3.41
  -7  -2  -6   52.25    1.19
  -7  -2  -6   53.23    1.91
  -7  -2  -6   53.96    1.34
  -7   2  -6   55.44    1.32
  -7   2  -6   53.84    1.45
  10  -1  -6   67.79    1.35
  10  -1  -6   65.62    1.77
  10   1  -6   63.90    2.05
  10   1  -6   64.49    1.43
  10  -1  -6   66.15    1.71
 -10   0   0    6.83    0.78
  10   0   0    6.60    1.32
  -1   0 -12  339.79    3.25
  -1   0 -12  315.45    3.03
   0  -3 -11   33.33    1.09
   0   3 -11   32.26    1.10
   0   3 -11   31.90    1.08
   0   3 -11   30.78    0.96
   0   3  11   28.99    1.24
   0   5   8   49.48    1.41
   0   5  -8   49.69    1.12
   0   5   8   48.75    1.48
   0  -5  -8   49.13    2.27
   0   5  -8   47.56    1.30
   0   5   8   48.28    1.86
   0   5  -8   48.48    1.03
   0   5  -8   48.53    1.23
  -2   6   5   57.86    1.61
  -2   6   5   57.51    1.43
   2   6  -5   57.04    1.24
   2   6  -5   54.32    1.23
   2   6  -5   53.66    1.43
   2  -6  -5   56.65    1.12
   2   6  -5   57.55    1.26
   5   5  -7    8.26    0.61
  -5   5   7    8.06    1.33
  -5   5   7    8.50    0.79
  -5   5   7    9.97    0.76
  -5   5   7    8.89    1.02
   5  -5  -7    8.19    0.65
   5   5  -7    7.84    0.87
  -4   6   0  851.35    8.03
   4  -6   0  849.46    4.44
   4   6   0  865.44    4.24
  -4   6   0  856.23    4.15
  -4   6   0  847.32    5.11
   8  -4  -5   72.11    1.34
   8   4  -5   69.80    2.34
  -8   4   5   67.90    1.90
   8   4  -5   71.77    1.53
  -8   4   5   74.34    2.37
   8   4  -5   69.80    1.59
  -8   4   5   67.38    1.65
  -6  -1  -8 1941.71    7.91
  -6  -1  -8 1914.09    7.66
  -6   1  -8 1924.72    8.15
  -6  -1  -8 1921.76   10.40
  -9  -2  -2   13.89    0.81
   9   2   2   15.02    1.91
  -9  -2  -2   11.00    1.10
  -9   2  -2   13.12    0.92
  -4   1 -10 1545.93    7.83
  -4   1 -10 1498.54    6.32
  -4   1 -10 1524.50    6.42
  -4  -1 -10 1518.29    9.63
  -4  -1 -10 1513.71    7.01
  -4  -1 -10 1501.79    6.45
  -4   1 -10 1534.44    6.97
  -2  -5  -7  582.26    6.31
  -2   5  -7  591.38    3.46
  -2   5  -7  591.57    4.11
  -9   1  -3    0.44    0.57
   9   1   3    0.60    1.31
  -9  -1  -3    0.37    0.53
  -9   1  -3   -0.18    0.33
  -9  -1  -3    1.09    0.84
  -9  -1  -3    0.45    0.41
   9  -1   3    0.29    0.93
   0   6  -5  128.30    2.06
   0   6  -5  139.69    1.99
   0   6  -5  133.07    1.79
   0   6   5  143.20    2.02
   0   6   5  137.62    2.82
   0  -6  -5  134.16    1.51
  -9   2   8  182.85    2.58
   9   2  -8  165.70    2.25
   9  -2  -8  166.06    2.60
   9   2  -8  171.91    2.51
   9   2  -8  164.53    2.24
   9  -2  -8  180.46    2.14
  -9   2   8  173.36    2.31
   9   2  -8  173.15    2.30
   6   1 -12  143.07    2.27
   6  -1 -12  143.22    2.10
   6  -1 -12  131.35    2.58
   6   1 -12  137.38    1.78
   6  -1 -12  132.19    1.60
   9   1  -9  150.90    2.24
   9   1  -9  153.60    2.27
   9  -1  -9  151.41    2.50
   9   1  -9  147.84    2.12
   9   1  -9  152.38    2.19
   5   3 -11  226.48    2.31
   5   3 -11  217.83    2.62
   5  -3 -11  233.87    3.84
   5   3 -11  232.86    2.67
  -5   3  11  223.30    2.91
  -8  -3  -3    0.95    1.06
  -8   3  -3    1.12    0.61
   8   3   3    0.49    1.53
  -8  -3  -3    1.79    0.66
  -8   3  -3    0.64    0.85
   4   6  -3    0.25    0.72
  -4   6   3    0.17    0.53
   4   6  -3    0.66    0.75
   4  -6  -3    0.23    0.62
  -4   6   3    0.35    0.71
  -4   6   3    0.76    1.56
   4   6  -3    0.18    0.69
  -4   6   3    1.00    0.64
   4   6  -3    1.26    0.55
   7   3   5 1140.68    9.60
  -7  -3  -5 1119.98    7.74
  -7   3  -5 1113.15    6.59
  -7  -3  -5 1140.29    5.95
  -7   4  -3  415.89    4.60
  -7  -4  -3  410.89    3.36
   7   4   3  405.87    6.07
  -7   4  -3  413.49    3.75
  -4   4  10  479.04    3.94
  -4   4  10  481.11    3.73
   4   4 -10  471.45    2.79
   4  -4 -10  497.52    5.60
   4   4 -10  477.01    3.45
   4   4 -10  465.35    3.43
  -4   4  10  463.00    4.26
   4   4 -10  480.34    3.60
  -4   4  10  475.31    4.76
  -8   4   0  107.64    2.64
  -8  -4   0  115.93    1.82
  -8   4   0  109.33    2.00
  -8  -4   0  114.73    2.26
   8   4   0  111.75    1.72
   8   4   0  118.22    3.66
   2   2  11  126.56    2.27
  -2   2 -11  132.78    2.09
  -2  -2 -11  139.61    3.33
  -2  -2 -11  137.00    2.12
  -2   2 -11  143.53    2.10
  10   0  -7    0.01    0.67
  10   0  -7    0.67    0.59
  -7   0  -7   -0.07    0.60
  -7   0  -7    0.26    0.43
  -7   0  -7    1.06    0.74
  -3   0 -11    1.10    0.61
  -3   0 -11    0.01    0.46
  -9   3   0   58.45    1.42
   9   3   0   57.05    2.81
  -9  -3   0   60.97    1.40
  -9   3   0   62.19    1.77
  -9  -3   0   56.77    1.65
  -2   4  -9  100.47    1.73
   2   4   9  104.62    1.95
  -2   4  -9   99.91    1.27
  -2  -4  -9  102.68    1.67
  -2  -4  -9  105.98    3.07
  -2   4  -9  104.14    1.83
  10  -1   0 1140.68    7.69
  10   1   0 1144.00    8.73
 -10   1   0 1138.45    6.05
 -10  -1   0 1130.18    5.24
  10  -2  -3  492.68    3.15
  10  -2  -3  476.16    3.79
 -10  -2   3  490.94    3.56
 -10  -2   3  496.56    4.21
  10   2  -3  471.33    5.95
   9   3  -6 1525.27    6.55
  -9   3   6 1546.73    7.74
  -9   3   6 1535.33    6.79
  -9  -3   6 1554.42    6.58
   9  -3  -6 1527.84    6.82
   9  -3  -6 1544.59    5.74
   3   0 -13    0.12    0.69
   3   0 -13    0.50    0.70
  -1   1 -12  448.06    3.50
  -1  -1 -12  438.04    3.48
  -1   1 -12  418.73    3.57
  -1  -1 -12  439.51    5.30
  -1  -1 -12  414.74    3.64
  -5   2  12  136.71    2.20
   5   2 -12  140.34    2.09
   5   2 -12  139.20    2.15
   2   6   4   84.80    2.14
  -2   6  -4   80.76    1.71
  -2   6  -4   83.09    1.37
   2   6   4   85.32    1.95
  -2   6  -4   85.23    2.01
   2   6   4   78.90    1.69
  -2   6  -4   80.36    1.41
  -2   6  -4   86.63    1.55
  -6  -5  -2   80.38    2.10
   6   5   2   85.18    2.92
  -6  -5  -2   80.24    1.45
  -6   5  -2   85.99    1.41
  -6   5  -2   81.76    1.54
  -6   5  -2   82.00    1.40
  10   2  -4  226.88    2.41
  10  -2  -4  223.61    2.18
  10  -2  -4  222.78    2.64
 -10  -2   4  229.71    2.43
  -4   5   8  932.96    5.45
  -4   5   8  950.60    7.32
   4   5  -8  915.17    4.59
   4   5  -8  910.88    5.11
   4   5  -8  894.79    4.46
   4  -5  -8  915.84    4.20
  -4   5   8  912.95    5.43
   4   5  -8  933.11    5.22
  -4   5   8  888.68    5.91
   4  -5  -8  959.96    6.89
   6   5  -6   96.50    1.83
  -6   5   6  100.52    1.89
  -6   5   6   96.88    2.85
   0  -4 -10    3.82    1.63
   0  -4 -10    3.56    0.57
   0   4  10    4.95    0.83
   0   4 -10    3.23    0.64
   0   4 -10    3.90    0.61
   0   4 -10    4.31    0.62
   5   5   4  707.81    6.73
  -5  -5  -4  697.54    4.16
   5   5   4  679.69    5.04
  -5   5  -4  728.85    6.16
  -5   5  -4  702.17    4.24
  -5   5  -4  702.43    3.97
  -5   5  -4  724.92    4.61
  -5   5  -4  693.56    4.82
  -5  -5  -4  684.78    6.11
  -6   4  -5  544.85    4.93
  -6   4  -5  516.78    4.22
  -6   4  -5  498.57    3.70
  -6  -4  -5  489.88    5.28
   6   4   5  504.13    6.02
  -6   4  -5  528.90    3.82
  -6  -4  -5  511.88    3.73
   2   0 -13    0.01    0.70
  -4   6  -1    6.88    1.57
  -4   6  -1    7.69    0.84
  -4   6  -1    6.56    0.60
  -4   6  -1    5.67    0.58
   4   6   1    6.33    1.26
   4  -6   1    6.36    0.64
  -4   6  -1    6.46    0.66
   6  -4  -9   76.69    1.28
   6   4  -9   72.29    1.65
   6  -4  -9   73.42    2.02
   6   4  -9   77.22    1.62
  -6   4   9   74.74    1.87
   0  -2 -12  212.66    2.60
   0  -2 -12  202.81    3.97
   0   2 -12  203.00    2.28
   0   2  12  207.76    2.71
   0   2 -12  207.44    2.51
  10   2  -2 1537.89   10.97
  10  -2  -2 1516.75    7.02
 -10  -2   2 1575.09    6.61
 -10  -2   2 1599.40    7.92
   3   6   3   24.01    1.36
  -3   6  -3   26.08    0.92
  -3   6  -3   25.45    1.59
  -3   6  -3   27.81    1.14
   3   6   3   27.92    1.29
   3  -6   3   30.06    0.93
  -3   6  -3   26.58    0.94
   3   6   3   24.36    0.98
  -3   6  -3   27.92    0.96
  -3   6   5   63.29    1.26
  -3   6   5   68.32    2.31
   3  -6  -5   65.29    1.20
  -3   6   5   64.82    1.55
  -3   6   5   66.55    1.60
   3   6  -5   68.59    1.36
   3   6  -5   67.59    1.46
   3   6  -5   66.34    1.40
   4   0 -13   -0.01    0.66
   4   0 -13    0.14    0.68
  -7   2  11    0.51    0.62
   7   2 -11   -0.02    0.70
   7   2 -11    0.36    0.75
   7   2 -11    0.52    0.56
   7  -2 -11    0.42    0.48
   7  -2 -11    0.34    1.00
  -7   2  11    0.04    0.67
   1   6   5  184.74    2.36
  -1   6  -5  190.57    2.30
  -1   6  -5  185.80    2.42
   1   6   5  188.72    2.58
  -1   6  -5  189.25    2.05
   1   6   5  187.02    3.15
  10  -1  -7    8.42    0.70
  10  -1  -7    8.96    0.91
  10   1  -7    8.40    0.77
  10   1  -7    9.07    0.81
   8   2 -10  190.51    2.54
  -8   2  10  191.29    2.50
   8   2 -10  189.95    2.18
   8  -2 -10  198.11    2.14
  -8   2  10  194.39    2.59
   8   2 -10  189.42    2.57
   8  -2 -10  188.14    2.88
   8   2 -10  200.41    2.41
  10   2  -5  327.95    3.39
  10   2  -5  326.37    4.62
  10  -2  -5  332.39    3.30
  10   2  -5  336.53    2.95
  -4   6   4  304.33    3.25
   4   6  -4  317.69    3.12
   4   6  -4  299.36    2.98
   4   6  -4  310.27    2.68
   4   6  -4  305.59    3.07
  -4   6   4  300.49    2.90
  -4   6   4  316.06    4.70
  -4   6   4  296.62    3.07
   7  -4  -8  349.27    3.58
   7  -4  -8  355.25    2.74
   7   4  -8  358.52    3.42
  -7   4   8  346.96    3.83
   7   4  -8  351.83    3.21
   7   4  -8  339.13    3.38
  -7   4   8  357.63    3.52
  -7   5   2  223.08    2.93
  -7  -5   2  214.48    2.26
   7   5  -2  223.72    2.40
   7   5  -2  224.03    4.19
   7   5  -2  219.75    2.62
  -7   5   2  222.02    4.16
   7  -5  -2  223.59    2.14
  -7  -1  -7   35.32    1.55
  -7  -1  -7   35.85    1.06
  -7  -1  -7   39.23    1.12
  -7   1  -7   34.43    1.14
  -8   4   6  818.60    5.31
  -8   4   6  850.97    7.09
   8   4  -6  839.29    4.99
  -8   4   6  821.35    5.92
   8  -4  -6  859.35    4.45
   8   4  -6  819.36    5.12
  -3  -1 -11  525.24    3.56
  -3  -1 -11  532.46    5.68
  -3   1 -11  532.29    3.92
  -3   1 -11  563.50    4.43
  -3   1 -11  561.61    3.74
  -3   1 -11  534.29    3.31
  -3  -1 -11  539.28    4.07
   7   5  -3  108.88    1.76
  -7   5   3  107.36    3.06
  -7  -5   3  108.22    1.60
  -7   5   3  108.35    2.20
   7   5  -3   99.46    1.85
   7   5  -3  105.06    2.79
   7  -5  -3  108.05    1.54
   3   1 -13    0.65    0.63
  -3   1  13    0.57    0.51
   3   1 -13    0.80    0.57
   3  -1 -13    1.11    0.63
   3  -1 -13    0.42    0.98
  10   0   1    0.01    1.19
 -10   0  -1    0.76    0.74
   8   0 -11    0.31    0.72
   8   0 -11    0.23    0.55
   8   0 -11    0.09    0.61
  -1  -5  -8   33.05    1.97
  -1   5  -8   33.50    1.02
  -1   5  -8   32.89    1.12
  -1   5  -8   36.16    1.23
  -1   5  -8   34.62    0.88
   1   5   8   35.97    1.65
  -5   3  -8   22.20    0.98
  -5  -3  -8   22.97    1.01
  -5   3  -8   21.73    0.92
  -5   3  -8   21.94    1.06
   5   3   8   24.49    0.95
   7  -3 -10    3.23    0.98
   7   3 -10    3.03    0.72
  -7   3  10    3.24    0.80
   7  -3 -10    2.09    0.53
  -7   3  10    3.35    0.72
   7   3 -10    2.19    0.67
   2   1 -13   25.87    1.07
  -2   1  13   25.63    1.03
   2  -1 -13   24.97    1.50
   2  -1 -13   23.97    1.05
   7   5  -1    1.76    0.77
   7  -5  -1    2.16    0.50
  -7   5   1    2.14    0.76
  -7  -5   1    2.91    0.55
   7   5  -1    2.28    1.49
  -7   5   1    2.95    1.57
  -4  -3  -9    5.59    0.68
  -4   3  -9    4.82    0.74
  -4   3  -9    5.96    0.77
  -4   3  -9    5.86    0.59
   4   3   9    6.89    0.78
   1   0 -13    1.22    0.64
   8   4   1    5.31    1.88
  -8  -4  -1    6.40    0.71
  -8  -4  -1    5.95    1.03
  -8   4  -1    6.38    1.19
  -8   4  -1    5.81    0.79
 -10   2   1   62.32    1.31
 -10  -2   1   61.90    1.66
   1   3  11   20.64    1.10
  -1   3 -11   18.60    0.95
  -1  -3 -11   19.03    0.92
  -1   3 -11   19.03    0.84
  -1   3 -11   17.90    0.92
   4  -1 -13   39.88    1.64
   4  -1 -13   42.49    1.27
   7   5  -4   23.45    1.01
   7   5  -4   20.97    1.12
  -7   5   4   23.08    1.84
   7   5  -4   21.00    1.38
  -7   5   4   20.33    1.26
  -7  -5   4   24.19    0.85
   7  -5  -4   24.67    0.90
  -5   4  10  285.14    3.06
   5   4 -10  276.50    2.81
   5   4 -10  278.03    2.14
   5   4 -10  277.48    2.63
   5  -4 -10  279.48    3.87
  -5   4  10  275.65    3.26
   5  -4 -10  265.33    2.11
   5   4 -10  269.05    2.66
   1   6  -6  143.55    1.98
  -1   6   6  152.82    2.12
   1  -6  -6  144.60    1.50
  -1   6   6  158.00    2.41
  -5  -2  -9  270.78    4.13
  -5   2  -9  271.48    2.81
   5   2   9  276.42    2.83
  -5   2  -9  277.44    2.59
   9   3   1    9.72    2.01
  -9   3  -1   12.03    1.02
  -9  -3  -1   11.04    1.08
  -9  -3  -1    8.56    0.75
  -9   3  -1   12.96    0.81
   7   0 -12   31.63    1.11
   7   0 -12   32.00    0.95
   7   0 -12   33.87    1.27
  -4   6  -2   12.88    0.71
  -4   6  -2    9.05    0.66
  -4   6  -2   10.81    0.87
  -4   6  -2    9.58    1.32
   4   6   2    9.57    1.22
  -4   6  -2    8.83    0.69
   4  -6   2    9.61    0.67
  -9   0  -4 1064.46    6.01
  -9   0  -4 1089.82    4.88
  -8  -2  -5   10.96    0.76
  -8   2  -5   11.61    0.86
   8   2   5   10.85    1.52
  -8   2  -5   10.44    0.70
  -8  -2  -5   10.13    0.59
  -8  -2  -5    9.95    1.21
  -8   3   9    8.56    0.89
  -8   3   9    9.10    0.81
   8   3  -9    9.43    0.91
   8  -3  -9   10.43    0.70
   8  -3  -9    9.05    1.01
   9   3  -7  231.31    2.61
  -9   3   7  227.23    2.67
   9  -3  -7  244.39    2.33
   9  -3  -7  235.56    2.73
   9   3  -7  249.64    2.70
  -9   3   7  241.73    3.13
  -2   6   6  226.89    2.78
   2   6  -6  218.21    2.20
   2  -6  -6  221.28    1.91
  -2   6   6  226.90    2.65
   2   6  -6  212.37    2.58
  -2   6   6  216.28    3.65
   2   6  -6  219.11    2.33
  10   2  -6  510.35    3.53
  10   2  -6  504.91    4.05
  10  -2  -6  537.64    4.18
  10   2  -6  522.91    5.42
  10  -2  -6  539.57    3.50
  10  -2  -6  508.61    4.35
  10   2  -6  524.32    3.74
   5   0 -13   -0.36    0.65
   5   0 -13   -0.03    0.64
  -6   3  -7  145.81    1.94
  -6  -3  -7  142.43    2.03
  -6   3  -7  146.69    2.14
  -6   3  -7  140.19    2.11
  10   0  -8 1163.35    5.63
 -10  -1  -1  460.31    4.17
 -10   1  -1  465.76    3.70
 -10   1  -1  459.42    3.25
  10  -1   1  464.02    4.92
 -10  -1  -1  468.30    3.21
  -8   1  11  123.52    1.94
   8  -1 -11  122.07    1.70
   8   1 -11  124.81    1.82
   8  -1 -11  124.56    1.85
   8   1 -11  118.40    1.88
   8   1 -11  127.59    2.02
   8   1 -11  123.59    2.03
   9   0 -10  105.25    1.78
   9   0 -10  104.07    1.99
   9   0 -10  104.46    1.85
   6  -3 -11   64.24    1.12
   6   3 -11   65.10    1.33
  -6   3  11   61.68    1.61
   6   3 -11   66.07    1.52
  -6   3  11   64.30    1.59
   6  -3 -11   67.66    2.09
   6   3 -11   64.85    1.50
   6   2   8  222.44    2.28
  -6   2  -8  217.74    2.40
  -6  -2  -8  224.59    3.59
  -6   2  -8  225.59    2.54
  -7   5   0    4.58    0.79
  -7   5   0    5.08    1.50
   7  -5   0    3.90    0.50
  -7  -5   0    3.98    0.58
  -4  -2 -10  438.89    3.58
  -4   2 -10  452.92    3.67
   4   2  10  452.44    3.79
  -4  -2 -10  442.25    5.35
  -4   2 -10  450.54    3.67
  -4   2 -10  453.83    3.12
  -2   5   9  119.67    2.04
   2  -5  -9  120.80    2.84
   2   5  -9  115.08    1.43
   2   5  -9  114.76    1.56
   2   5  -9  110.23    1.62
  -2   5   9  115.81    2.49
  -2   5   9  117.53    2.11
   2   5  -9  115.69    1.61
   9   2   3  278.76    4.77
   9  -2   3  272.45    3.45
  -9   2  -3  278.66    2.88
   1   1 -13   32.81    1.05
   1  -1 -13   34.10    1.64
   1  -1 -13   35.38    1.23
   1   1 -13   34.97    1.13
  -1   1  13   36.48    1.21
   5  -6  -2  918.31    4.50
  -5   6   2  914.14    5.10
   5   6  -2  904.39    5.12
  -5   6   2  911.86    5.50
  -5   6   2  890.77    5.24
  -5   6   2  900.44    8.18
   5   6  -2  935.89    6.62
  -8   0  -6  606.81    3.54
  -8   0  -6  604.94    4.82
  -1  -4 -10  207.83    4.11
  -1   4 -10  222.32    2.37
  -1   4 -10  227.51    2.53
  -1  -4 -10  226.51    2.37
   1   4  10  205.49    2.67
  -1   4 -10  213.07    2.46
   0   6   6   97.60    2.43
   0   6   6   96.76    1.49
   0   6  -6   95.53    1.61
  -5   6   1  372.49    3.23
   5  -6  -1  382.88    2.80
  -5   6   1  375.19    2.56
  -5   6   1  368.54    3.32
   5   6  -1  385.39    4.42
  -2   0 -12    8.90    0.69
  -2   0 -12    9.80    0.78
   6   2 -12  278.46    2.46
   6  -2 -12  284.95    2.69
  -6   2  12  277.86    2.94
   3   3  10    0.76    0.73
  -3  -3 -10    1.13    0.61
  -3   3 -10    0.52    0.60
  -3   3 -10   -0.18    0.21
  -3   3 -10    1.57    0.68
   5   5  -8   19.90    0.94
   5   5  -8   18.79    0.77
   5  -5  -8   19.14    0.73
  -5   5   8   20.25    0.88
  -5   5   8   20.75    1.44
   5   5  -8   21.10    1.01
  -5   5   8   21.73    1.01
   5   5  -8   19.77    0.69
   9  -2  -9    9.76    0.95
  -9   2   9    9.05    0.72
   9   2  -9    8.34    0.69
   9   2  -9   10.32    0.89
  -9   2   9    9.22    0.81
   9   2  -9    9.67    0.85
   9   2  -9    8.55    0.78
  -4   6   5  640.55    6.31
   4   6  -5  609.76    3.77
   4   6  -5  634.98    4.08
  -4   6   5  623.73    3.96
   4  -6  -5  631.88    3.46
   4   6  -5  644.07    3.70
  -4   6   5  634.36    4.28
  -4   6   5  621.50    4.54
   4   6  -5  639.28    4.25
  -6   5  -3   34.73    1.68
  -6   5  -3   37.28    1.04
   6   5   3   37.52    2.00
  -6   5  -3   34.91    1.03
  -6  -5  -3   33.14    1.59
  -6  -5  -3   37.17    1.04
   3  -3 -12    8.52    1.44
  -3   3  12    6.07    0.64
   3  -3 -12    6.46    0.59
   3   3 -12    7.70    0.59
   3   3 -12    7.17    0.65
  -4  -5  -6  333.84    4.60
   4   5   6  315.72    2.92
  -4   5  -6  338.48    2.60
   4   5   6  322.57    3.62
  -4   5  -6  311.22    2.85
  -4  -5  -6  324.61    2.72
  -4   5  -6  314.33    3.05
  -4   5  -6  315.91    3.09
  -4   5  -6  332.44    3.28
  -6   5   7   12.04    1.42
  -6   5   7   10.72    0.86
   6   5  -7   10.19    0.89
   6   5  -7   11.15    0.90
   6  -5  -7   11.76    0.68
   6   5  -7   10.16    0.57
   2   3 -12   27.52    0.90
  -2   3  12   27.36    1.08
   2   3 -12   26.41    0.88
   2  -3 -12   27.63    0.95
   1   5  -9    3.47    0.47
  -1   5   9    3.24    0.79
   1   5  -9    4.05    0.58
  -1   5   9    3.70    0.75
   1   5  -9    3.98    0.59
   1  -5  -9    3.93    1.42
  -1   5   9    3.67    1.07
  -3  -5  -7  253.69    4.14
  -3   5  -7  251.75    2.56
  -3   5  -7  252.98    2.67
  -3   5  -7  245.19    2.10
   3   5   7  247.56    2.69
   3   5  -9   84.86    1.33
   3  -5  -9   85.86    2.35
   3   5  -9   83.61    1.46
  -3   5   9   84.94    2.20
  -3   5   9   82.83    1.83
  -3   5   9   83.88    1.67
  -3   5   9   83.19    1.52
  -7  -5   5  316.47    2.66
  -7   5   5  320.08    4.69
   7   5  -5  315.40    3.01
   7  -5  -5  325.00    2.63
   7   5  -5  320.96    3.17
   7   1 -12   26.81    0.90
   7  -1 -12   26.84    0.85
   7   1 -12   23.00    0.89
   7  -1 -12   24.14    1.26
   7  -1 -12   25.96    0.99
   7   1 -12   24.37    1.15
   7   1 -12   27.29    1.14
  -5   6   3  210.06    3.96
   5  -6  -3  206.11    2.08
  -5   6   3  203.28    2.39
  -5   6   3  197.34    2.41
   5   6  -3  204.97    2.45
   5   6  -3  194.99    2.74
   7   4   4  101.74    3.02
  -7  -4  -4  101.17    1.69
  -7  -4  -4   99.34    2.40
  -7   4  -4   99.28    1.84
  -4   4  -8  283.59    2.84
  -4  -4  -8  285.50    4.52
  -4   4  -8  281.08    2.81
  -4  -4  -8  276.61    2.69
   4   4   8  275.11    2.78
  -9  -1  -4   51.13    1.07
   9   1   4   50.92    2.16
   9  -1   4   50.14    1.77
  -9  -1  -4   49.70    1.11
  -9   1  -4   52.65    1.25
  -9  -1  -4   54.92    1.66
   3  -6   4 1513.54    5.70
   3   6   4 1440.94    7.75
   3   6   4 1437.63    6.62
  -3   6  -4 1494.43    6.94
  -3   6  -4 1512.62    6.35
  -3   6  -4 1463.88    6.41
  -3   6  -4 1500.03    8.20
   3   6   4 1463.94    8.03
  -3   6  -4 1523.71    5.89
   2   6   5   12.40    0.89
   2   6   5   11.03    1.14
   2   6   5   10.17    0.86
  -2   6  -5    9.59    0.61
  -2   6  -5   11.07    0.73
  -2   6  -5   11.39    0.79
  -8   3  -4   82.09    1.80
  -8  -3  -4   78.60    1.52
   8   3   4   78.86    2.93
  -8   3  -4   84.47    1.59
  -8  -3  -4   82.87    2.23
  10   2   0   23.21    2.09
 -10   2   0   27.13    0.97
 -10  -2   0   24.98    0.87
  -3   6   6   39.30    1.26
   3  -6  -6   42.82    0.96
   3   6  -6   37.60    1.05
  -3   6   6   39.36    1.29
  -3   6   6   47.51    2.01
   3   6  -6   39.23    1.01
   3   6  -6   43.37    1.14
   3   6  -6   42.14    1.30
  -8   4   7  705.08    4.82
  -8   4   7  690.43    5.31
   8  -4  -7  707.97    4.54
   8   4  -7  701.79    4.50
   8  -4  -7  712.29    3.90
   8   4  -7  683.62    4.61
  -1   2 -12  400.96    2.98
  -1   2 -12  382.56    3.34
  -1  -2 -12  381.98    5.11
   1   2  12  386.07    3.64
  -1  -2 -12  402.18    3.47
  -1   2 -12  375.41    3.47
   5  -1 -13  364.54    3.25
   5   1 -13  373.78    3.41
   5  -1 -13  362.94    4.01
  10   1  -8    3.29    0.74
  10  -1  -8    4.42    0.69
  10   1  -8    3.87    0.61
  10   1  -8    3.64    0.77
  10  -1  -8    3.27    0.77
  -5   4  -7  318.44    2.94
  -5  -4  -7  308.84    2.83
   5   4   7  312.37    2.75
  -5   4  -7  315.88    3.12
  -5   4  -7  308.89    2.93
  -5  -4  -7  316.04    4.45
  -5   6   0  149.06    2.04
  -5   6   0  146.74    1.62
   5  -6   0  147.72    1.72
  -5   6   0  143.69    2.10
  -5   6   0  150.19    3.39
  -9   1  10  207.48    2.29
   9   1 -10  214.19    2.61
   9  -1 -10  212.52    2.27
   9   1 -10  210.16    2.47
   9   1 -10  209.25    2.50
   0   0 -13    0.32    0.56
   0   0 -13    0.24    0.63
   4  -3 -12  175.85    3.42
   4   3 -12  174.81    2.05
   4   3 -12  176.82    2.19
  -4   3  12  174.98    2.50
  -8  -1  -6   15.15    1.18
  -8  -1  -6   14.51    0.72
  -8  -1  -6   14.43    0.75
  -8   1  -6   14.16    0.79
  -2   1 -12  187.25    2.57
  -2  -1 -12  172.98    2.06
  -2   1 -12  175.66    2.11
  -2   1 -12  177.38    2.21
  -2  -1 -12  184.25    3.31
  -5   5  -5    0.17    0.57
   5   5   5    0.93    0.96
  -5   5  -5    0.62    0.59
  -5  -5  -5    0.57    0.49
  -5  -5  -5    1.06    1.03
   5   5   5    0.74    0.73
  -5   5  -5    0.13    0.82
  -5   5  -5    0.63    0.55
  -1   3  12   40.89    1.43
   1  -3 -12   45.51    1.16
   1   3 -12   44.72    1.13
   1   3 -12   45.34    1.14
  -1   3  12   45.48    1.33
  -2   4  11    1.03    0.61
   2   4 -11    1.04    0.39
   2  -4 -11    0.88    1.37
  -2   4  11    1.54    0.75
  -2   4  11    0.82    0.80
   2   4 -11    1.22    0.44
  -2   4  11    1.56    0.53
  -3  -4  -9  130.03    1.84
  -3   4  -9  129.15    1.38
  -3   4  -9  132.47    2.00
  -8  -4  -2    0.95    0.58
   8   4   2    0.16    1.79
  -8   4  -2    0.49    0.97
  -8   4  -2    0.98    0.63
  -8  -4  -2    1.90    0.99
  10   2  -7  134.31    1.86
  10  -2  -7  142.24    1.81
  10  -2  -7  135.11    2.09
  10   2  -7  131.78    2.00
 -10   2   7  146.48    2.09
  10   2  -7  136.82    1.94
 -10   2   7  137.81    1.88
 -10   0  -2  140.45    2.19
  10   0   2  143.92    3.01
   3  -4 -11  117.78    2.89
  -3   4  11  115.13    2.07
  -3   4  11  120.55    1.86
  -3   4  11  117.27    1.87
  -3   4  11  114.73    2.24
  -2   5  -8  258.50    2.59
  -2   5  -8  257.17    2.10
   2   5   8  255.87    2.89
  -2  -5  -8  261.98    4.28
  -7   2  -7 1047.89    5.32
  -7  -2  -7 1034.31    7.37
  -7  -2  -7 1033.89    5.39
   7   5   1   69.65    2.59
  -7  -5  -1   64.84    1.79
  -7   5  -1   72.30    1.61
  -7  -5  -1   73.75    1.35
  -7   5  -1   77.72    2.32
   5   6  -4  132.75    1.71
   5   6  -4  131.78    2.02
   5   6  -4  133.03    2.02
   5  -6  -4  129.52    1.68
   5   6  -4  128.87    2.02
  -5   6   4  127.10    2.11
  -5   6   4  140.10    3.31
  -5   6   4  134.12    1.91
  -5   6   4  133.86    1.95
  -3  -2 -11  826.06    4.89
   3   2  11  850.05    5.31
  -3   2 -11  809.35    5.16
  -3  -2 -11  799.36    7.23
  -3   2 -11  796.38    4.88
  -3   2 -11  829.98    3.89
   0   5  -9   10.57    0.58
   0   5   9   10.10    0.81
   0  -5  -9   13.32    1.65
   0   5  -9    9.95    0.75
   0   5  -9   10.25    0.61
   0   5   9   10.97    1.19
   0   5   9   10.92    0.97
   0   5  -9   10.90    0.75
   4  -6   3   30.13    0.82
  -4   6  -3   29.92    1.09
   4   6   3   29.47    1.45
  -4   6  -3   29.82    0.91
  -4   6  -3   29.21    0.99
   4   6   3   27.90    0.87
  -4   6  -3   32.82    0.98
  -4   6  -3   30.61    1.65
  -7   3  -6  167.78    2.18
  -7  -3  -6  167.50    2.15
  -5   0 -10  933.52    4.73
  -5   0 -10  892.76    4.80
   1   6   6  587.52    5.37
   1   6   6  580.34    3.74
  -1   6  -6  572.69    4.07
   1   6   6  576.35    4.38
   3   2 -13  114.99    1.82
   3  -2 -13  113.77    2.74
  -3   2  13  111.61    1.73
   3   2 -13  113.20    1.70
  -6   0  -9    0.12    0.45
  -4   5   9    5.01    0.85
   4   5  -9    5.37    0.69
   4   5  -9    4.91    0.52
   4  -5  -9    5.23    0.99
  -4   5   9    5.09    0.64
   4   5  -9    5.07    0.64
   4  -5  -9    4.87    0.44
  -4   5   9    4.89    0.67
  -4   5   9    4.18    0.98
   4   5  -9    5.55    0.49
   7   4  -9  313.80    3.01
   7  -4  -9  310.99    2.46
  -7   4   9  318.24    3.20
  -7   4   9  312.49    3.46
   2  -2 -13   40.24    1.78
   2  -2 -13   35.80    1.11
   2   2 -13   37.52    1.10
   2   2 -13   40.10    1.14
  -2   2  13   41.58    1.18
  11   0  -4  775.27    5.13
  11   0  -4  812.80    6.51
  -5   6  -1   30.41    1.91
  -5   6  -1   32.88    1.08
   5   6   1   30.53    1.59
   5  -6   1   33.31    0.87
  -5   6  -1   32.21    0.88
  -5   6  -1   30.83    1.04
  -9   3  -2   35.39    1.25
  -9   3  -2   34.94    1.07
  -9  -3  -2   40.66    1.54
   9   3   2   37.91    2.33
   0   1 -13  382.15    3.20
   0   1 -13  387.42    3.16
   0  -1 -13  392.16    4.46
   0  -1 -13  391.05    3.41
   0   1  13  392.66    3.57
   6   0 -13    0.26    0.61
   6   0 -13    0.06    0.59
  -6  -4  -6   34.67    1.07
  -6   4  -6   33.44    1.11
  -6   4  -6   31.64    1.13
   6   4   6   34.07    1.59
  -6  -4  -6   29.70    1.72
  -6   4  -6   34.31    1.23
  -6   4  -6   32.26    1.01
  11   0  -3    0.46    1.12
   1   4 -11   88.13    1.43
   1  -4 -11   94.41    2.92
  -1   4  11   89.51    1.42
   1   4 -11   89.63    1.48
  -1   4  11   91.09    1.74
   1   4 -11   90.01    1.35
  -1   4  11   90.14    2.04
  -9  -4   3   20.95    0.99
   9   4  -3   20.61    0.88
  -9   4   3   23.64    1.41
  -9   4   3   21.89    0.99
   9   4  -3   21.38    1.81
   9  -4  -3   23.51    0.78
  -9  -4   3   24.19    0.90
   9   3  -8  136.61    1.99
   9  -3  -8  139.30    1.76
   9   3  -8  131.82    1.99
  -9   3   8  136.90    2.30
   9  -3  -8  132.99    2.06
  -9   3   8  132.33    2.00
   6   4 -10  904.68    5.17
  -6   4  10  881.45    5.83
   6   4 -10  907.55    4.83
   6   4 -10  891.11    3.92
   6   4 -10  938.95    5.08
   6  -4 -10  894.67    4.06
   6  -4 -10  852.31    6.14
  -7   5   6  105.81    2.70
   7   5  -6  106.46    1.88
   7  -5  -6  107.33    1.49
   7   5  -6  105.33    1.77
   4  -2 -13  188.24    2.24
  -4   2  13  179.12    2.37
   4   2 -13  179.21    2.09
   4  -2 -13  181.35    3.15
  -9  -4   2  207.61    2.69
  -9   4   2  201.50    2.45
   9   4  -2  192.59    2.15
  -9  -4   2  216.55    2.28
   9   4  -2  203.25    4.12
   9  -4  -2  203.24    1.86
  -9   4   2  202.10    3.07
  -2  -3 -11  120.31    1.82
  -2  -3 -11  105.64    2.96
   9   4  -4    3.92    0.60
   9   4  -4    4.55    1.29
   9  -4  -4    3.91    0.56
  -9  -4   4    4.18    0.61
  -9   4   4    4.18    1.02
   9   4  -4    4.04    0.68
  -9   4   4    3.96    0.66
  -9   4   4    4.14    0.81
 -10  -1  -2   15.12    0.69
 -10   1  -2   13.18    0.76
  10   1   2   14.17    1.60
  10  -1   2   13.50    1.20
 -10  -1  -2   12.56    0.95
 -10   1  -2   15.43    0.69
   4   4 -11   49.02    1.03
  -4   4  11   49.52    1.31
  -4   4  11   46.77    1.43
   4   4 -11   49.58    1.08
  -4   4  11   47.98    1.20
   4  -4 -11   51.43    1.97
   4   4 -11   49.22    1.14
  11   0  -5    0.34    0.51
  11   0  -5    0.40    0.93
  11   0  -5    0.01    0.69
   4   6  -6  158.62    1.88
  -4   6   6  161.86    2.37
  -4   6   6  161.61    2.01
   4   6  -6  161.95    2.05
   4  -6  -6  161.11    1.73
   4   6  -6  157.56    1.88
  -4   6   6  164.07    2.17
  -4   0 -11    0.24    0.52
  -4   0 -11   -0.08    0.46
  -4   0 -11    0.37    0.42
  10   0  -9    0.24    0.54
  10   0  -9   -0.19    0.62
  -5   1 -10   45.33    1.05
  -5  -1 -10   44.79    1.79
  -5  -1 -10   47.19    1.19
   5   1  10   47.32    1.28
  -5   1 -10   44.66    1.13
  10  -3  -3   27.44    0.79
  10   3  -3   28.88    1.91
 -10  -3   3   28.76    1.17
 -10   3   3   26.35    0.95
 -11   0   2    0.57    0.66
  11   0  -2    0.74    1.21
  -5   3  12   19.12    1.00
   5  -3 -12   21.22    1.51
   5   3 -12   20.12    0.91
   5   3 -12   20.41    0.91
  10   2   1    4.01    1.64
 -10  -2  -1    4.37    0.94
  10  -2   1    4.46    1.01
 -10  -2  -1    4.78    0.59
 -10   2  -1    4.24    0.59
 -10  -3   4   15.54    0.91
  10   3  -4   14.03    0.74
  10  -3  -4   15.61    0.68
  10   3  -4   14.31    1.49
 -10  -3   4   14.06    0.78
 -10   3   4   13.81    0.80
   8  -2 -11  298.88    3.39
   8  -2 -11  294.92    2.47
   8   2 -11  287.86    2.96
   8   2 -11  291.23    2.97
  -8   2  11  287.33    2.91
  -6  -1  -9   12.93    0.75
  -6  -1  -9   13.03    0.73
  -6   1  -9   13.31    0.76
  -6   1  -9   12.26    0.66
  -6  -1  -9   11.45    1.24
  -2   6   7    1.97    0.73
  -2   6   7    2.29    1.19
  -2   6   7    1.72    0.61
   2   6  -7    1.67    0.58
   2   6  -7    1.75    0.54
   2  -6  -7    2.06    0.35
   2   6  -7    1.41    0.44
   1   6  -7  144.76    1.67
   1   6  -7  147.69    1.87
  -1   6   7  142.44    2.22
   1   6  -7  136.40    1.80
  -1   6   7  138.89    1.99
  -1   6   7  141.79    2.83
  11   1  -4  630.46    6.06
  11  -1  -4  614.60    5.35
 -11  -1   4  620.43    3.55
  -7   0  -8  658.98    3.68
  -7   0  -8  664.96    4.00
   6   1 -13   10.98    0.85
   6   1 -13   10.44    0.82
   6  -1 -13   10.17    0.74
   6  -1 -13   11.94    1.01
   1  -2 -13  187.59    2.30
  -1   2  13  178.14    2.28
   1   2 -13  183.08    2.11
   1   2 -13  181.58    2.40
   1  -2 -13  184.66    3.39
   1   2 -13  188.08    2.19
  11  -1  -3   45.14    1.77
  11  -1  -3   48.61    1.33
  11   1  -3   47.62    2.03
 -11  -1   3   49.54    1.41
 -11  -1   3   50.33    1.03
   0   3 -12   46.16    1.18
   0   3  12   45.49    1.33
   0   3 -12   48.14    1.21
 -10  -3   2  299.49    3.20
 -10   3   2  301.64    2.97
  -5   6   5   28.72    0.99
   5   6  -5   29.11    0.93
   5   6  -5   27.97    1.07
  -5   6   5   28.22    1.15
  -5   6   5   29.77    1.88
   5   6  -5   30.72    1.12
  -5   6   5   27.05    0.97
   0   7   0    0.71    0.61
   0   7   0    0.67    0.73
   0   7   0    0.31    0.35
   0   7   0    0.94    0.52
  -9   4   1  100.22    1.77
  -9   4   1  103.16    2.23
  -9  -4   1  104.32    1.61
  -9  -4   1  102.03    2.03
  -2  -4 -10  119.90    1.73
  -2   4 -10  118.89    1.83
  -2  -4 -10  118.69    3.12
  -2   4 -10  117.15    1.76
  -9   4   5  162.20    2.24
   9   4  -5  163.18    2.98
   9   4  -5  158.57    1.98
   9   4  -5  166.09    2.10
  -9   4   5  167.13    2.51
   9  -4  -5  165.89    1.82
  -9  -4   5  169.60    2.02
  -6   5  -4   40.27    1.07
  -6  -5  -4   38.22    1.01
   6   5   4   41.47    1.89
  -6   5  -4   41.17    1.08
  -6   5  -4   41.58    1.53
   8   4  -8   20.53    1.02
  -8   4   8   22.65    1.03
   8   4  -8   24.16    1.04
   8  -4  -8   21.28    0.98
  -8   4   8   22.68    1.19
   6   5  -8  190.42    1.91
   6  -5  -8  193.06    1.87
   6   5  -8  190.58    2.35
  -6   5   8  194.30    2.42
   7  -3 -11  639.38    5.12
   7   3 -11  656.87    4.01
   7   3 -11  628.19    4.21
  -7   3  11  653.15    4.68
  -7   3  11  640.66    4.47
   7  -3 -11  635.99    3.44
   8  -3 -10  291.07    2.41
  -8   3  10  290.10    3.13
   8  -3 -10  285.28    3.21
   8   3 -10  284.88    2.82
   8   3 -10  284.95    2.73
   0   7   1    2.59    0.99
   0   7  -1    1.90    0.58
   0   7   1    2.30    0.53
   0   7  -1    2.12    0.61
   0   7  -1    2.05    0.43
   0   7   1    2.44    0.71
 -10  -3   5  604.20    4.24
 -10  -3   5  627.41    3.94
  10  -3  -5  625.76    3.55
  10   3  -5  653.98    3.99
  10   3  -5  596.35    5.98
 -10   3   5  608.77    4.03
  10   3  -5  589.42    3.66
  11  -1  -5  660.36    5.26
  11  -1  -5  652.14    4.52
  11   1  -5  642.40    5.93
  11   1  -5  685.25    3.83
  11  -1  -5  677.35    3.71
 -11  -1   5  691.50    3.70
  11   0  -6    2.65    0.56
  11   0  -6    2.38    0.88
 -11   0   6    2.67    0.36
  11   0  -6    3.15    0.72
  -7   2  12  313.13    3.04
   7  -2 -12  316.30    2.32
  -4  -1 -11  196.84    2.27
  -4   1 -11  188.35    1.91
  -4  -1 -11  197.53    3.27
  -4   1 -11  189.60    1.89
  -4   1 -11  197.81    2.19
  -1   7   0  251.37    1.94
   1   7   0  245.29    2.34
  -1   7   0  247.93    2.24
   1  -7   0  244.49    2.30
  -1   7   0  243.32    3.56
  -9  -2  -4  611.86    3.82
  -9   2  -4  604.72    3.96
  -9  -2  -4  598.06    5.04
  10   1  -9    0.13    0.55
  10   1  -9   -0.07    0.63
  10   1  -9    0.76    0.59
  10  -1  -9    0.32    0.58
  10  -1  -9    0.49    0.68
  -7   5  -2    8.82    0.82
  -7  -5  -2    8.73    0.68
  -7   5  -2    8.51    1.20
   7   5   2    6.69    1.58
  -7  -5  -2    7.02    1.03
  -3   6  -5    4.54    0.69
   3   6   5    4.66    0.86
  -3   6  -5    4.80    0.69
  -3   6  -5    3.92    0.54
   3   6   5    4.72    0.63
  -3   6  -5    4.43    0.60
   3   6   5    4.15    0.70
  -3   6  -5    4.12    0.59
  11   1  -2    0.68    1.22
 -11  -1   2    0.10    0.42
 -11   1   2    0.45    0.58
  -1   7   1   55.10    1.09
   1   7  -1   59.64    1.29
  -1   7   1   53.87    1.97
   1   7  -1   54.19    1.19
   1   7  -1   55.55    0.99
   1   7  -1   55.13    1.26
  -1   5  -9   83.42    1.16
  -1   5  -9   87.22    1.45
  -1   5  -9   85.32    1.59
  -1   5  -9   84.27    1.46
   1   5   9   86.20    2.12
  -1  -5  -9   83.10    2.52
   0   4 -11  765.77    4.07
   0   4  11  758.90    4.90
   0   4 -11  763.65    4.39
   0  -4 -11  739.30    7.17
   0   4  11  751.02    5.57
   0   4 -11  779.58    4.32
   0  -4 -11  787.49    4.20
   8   0 -12  108.42    1.56
   8   0 -12  108.47    1.74
   8   0 -12  103.61    1.81
   3   6  -7   62.01    1.42
  -3   6   7   63.50    2.15
  -3   6   7   62.39    1.48
   3   6  -7   59.97    1.18
   3   6  -7   61.09    1.16
   3   6  -7   63.62    1.25
   3  -6  -7   59.91    1.00
  -3   6   7   62.11    1.42
   5  -2 -13   28.32    0.93
  -5   2  13   24.00    0.95
   5  -2 -13   25.35    1.39
   5   2 -13   23.66    0.95
   5   2 -13   27.51    1.03
   5  -6   2   36.11    0.83
   5   6   2   35.91    1.63
  -5   6  -2   34.65    0.89
  -5   6  -2   34.40    1.09
  -5   6  -2   33.45    0.89
  -5   6  -2   36.80    1.73
  -5   6  -2   35.94    1.10
   0   6   7  137.91    2.17
   0   6  -7  139.96    1.88
   0   6  -7  156.68    1.67
   0   6   7  151.23    1.88
  10   2  -8   79.74    1.48
  10  -2  -8   79.92    1.61
  10  -2  -8   85.06    1.42
  10   2  -8   78.03    1.52
 -10   2   8   85.06    1.44
  10   2  -8   82.42    1.54
  -9   0  -5    0.14    0.66
  -9   0  -5   -0.05    0.49
   9   0   5    0.07    0.97
  -1   0 -13    0.08    0.59
  -1   0 -13    0.14    0.52
   9   2 -10   52.36    1.14
   9   2 -10   48.64    1.24
  -9   2  10   56.09    1.30
   9  -2 -10   58.55    1.21
   9   2 -10   57.24    1.44
   9  -2 -10   52.36    1.53
 -11   0   1    0.25    0.70
  11   0  -1    0.95    1.10
  -7  -1  -8    1.97    0.58
  -7  -1  -8    1.64    0.49
  -7  -1  -8    1.90    0.96
  -7   1  -8    1.64    0.51
   5   5  -9   14.13    0.64
   5   5  -9   13.02    0.82
  -5   5   9   14.66    0.84
   5  -5  -9   13.16    0.57
  -5   5   9   14.45    1.24
   5  -5  -9   12.59    0.96
   5   5  -9   14.15    0.83
   9   0 -11    0.04    0.66
   9   0 -11    0.33    0.57
   9   0 -11    0.66    0.58
   9   0 -11    0.47    0.50
   2   6   6  578.66    4.13
  -2   6  -6  578.05    3.45
  -2   6  -6  598.39    3.75
   2   6   6  563.64    3.78
   2   6   6  605.44    5.17
  -1   7  -1   26.50    1.31
   1   7   1   27.60    1.02
  -1   7  -1   28.33    0.77
  -1   7  -1   28.31    0.88
   1   7   1   26.10    1.00
 -10   3   1    0.37    0.49
 -10   3   1   -0.02    0.57
 -10  -3   1    0.40    0.79
  -8  -2  -6  213.82    2.25
  -8   2  -6  211.13    2.36
  -8   2  -6  208.23    2.14
   2   2  12    2.88    0.73
  -2  -2 -12    0.36    0.59
  -2  -2 -12    0.35    1.12
  -2   2 -12    0.36    0.55
  -5   4  11   14.45    0.84
   5  -4 -11   14.55    1.20
   5   4 -11   14.31    0.80
   5   4 -11   15.15    0.72
  -5   4  11   15.50    0.98
   5   4 -11   15.40    0.71
  -8   4  -3   -0.05    0.61
  -8  -4  -3    0.05    0.97
  -8  -4  -3    0.07    0.57
   8   4   3    0.19    1.47
  -8   4  -3    0.16    0.88
   0   7   2   64.10    1.95
   0   7  -2   64.41    1.10
   0   7   2   69.62    1.22
   0   7  -2   64.40    1.38
   0   7   2   65.08    1.43
   0  -7  -2   64.08    1.18
   0   7  -2   66.91    1.27
  -7  -4  -5   16.54    1.35
  -7   4  -5   15.10    0.88
  -7  -4  -5   16.85    0.83
   7   4   5   16.35    1.49
  -4   6  -4  448.82    4.09
   4   6   4  409.51    2.92
   4   6   4  435.83    4.02
  -4   6  -4  434.84    2.82
  -4   6  -4  446.57    3.11
  -4   6  -4  445.76    3.41
   4   6   4  432.94    3.82
  -4   6  -4  418.15    3.26
  -1   7   2  138.49    2.87
   1   7  -2  133.75    1.51
   1  -7  -2  134.55    1.64
   1   7  -2  134.26    1.77
   6   6  -2  246.10    2.51
  -6   6   2  247.82    2.62
   6   6  -2  245.18    3.24
  -6   6   2  258.82    4.23
   6  -6  -2  254.95    2.20
   6   6  -2  243.53    2.65
  -6   6   2  260.84    2.42
   8  -5  -3    0.82    0.47
   8   5  -3    0.46    1.04
   8   5  -3    0.86    0.64
  -8   5   3    1.20    1.21
   8   5  -3    1.15    0.52
  -8  -5   3    0.81    0.44
  -8   5   3    0.65    0.66
  -5   3  -9  719.31    3.90
  -5   3  -9  728.57    4.37
  -5  -3  -9  718.55    4.35
 -11  -1   6   69.14    1.19
  11  -1  -6   68.83    1.53
  11  -1  -6   69.01    1.24
  11   1  -6   68.99    1.29
  11   1  -6   73.22    2.04
  11  -1  -6   70.03    1.81
  -3   0 -12  205.26    2.25
  -3   0 -12  202.81    2.16
   8   5  -2   43.10    1.19
  -8  -5   2   43.29    1.05
   8  -5  -2   42.57    0.94
   8   5  -2   42.13    1.89
  -8   5   2   43.49    1.24
  -8   5   2   43.49    1.91
  -9  -4   0  244.29    2.38
   9   4   0  235.00    4.42
  -9   4   0  248.36    2.63
  -9  -4   0  235.25    2.99
  -9   4   0  254.34    3.15
  -7   5   7   89.94    2.46
  -7   5   7   80.49    1.80
   7   5  -7   90.88    1.61
   7   5  -7   75.57    1.53
  -8   3  -5    1.76    0.54
  -8  -3  -5    1.98    1.10
   8   3   5    2.02    1.27
  -8  -3  -5    1.45    0.57
  -8   3  -5    1.89    0.72
   3   0 -14  262.43    2.69
   6  -6  -1    9.74    0.61
   6   6  -1    8.01    1.16
  -6   6   1    8.86    0.66
  -6   6   1    8.62    0.72
  -6   6   1    7.96    1.47
 -10   0  -3   -0.01    0.38
  10   0   3    0.56    1.06
 -10   0  -3    0.17    0.66
  10  -3  -6   41.40    1.00
 -10   3   6   39.46    1.11
  10   3  -6   39.05    1.06
  10   3  -6   42.33    1.14
 -10  -3   6   41.08    1.16
  10  -3  -6   41.28    1.12
  -6   6   3  115.79    1.61
   6  -6  -3  112.60    1.49
   6   6  -3  106.25    2.02
   6   6  -3  111.21    1.85
  -6   6   3  110.59    1.78
  -6   6   3  110.18    2.94
   6   6  -3  109.02    1.71
  -6   6   3  104.29    1.83
  -4   5  -7  238.66    2.43
  -4   5  -7  231.11    1.96
  -4   5  -7  243.85    2.57
   4   5   7  243.43    2.44
  -4  -5  -7  236.73    2.21
  -4  -5  -7  219.12    3.70
   4   5   7  239.06    3.09
  -4   5  -7  245.49    2.57
  -4   5  -7  224.17    2.20
   9   4  -6  458.24    3.35
   9  -4  -6  463.02    3.01
  -9   4   6  467.24    3.70
   9   4  -6  469.35    3.51
   8   1 -12   52.89    1.31
   8   1 -12   47.75    1.10
   8  -1 -12   52.37    1.46
   8   1 -12   52.09    1.15
   8  -1 -12   51.70    1.09
  -8   1  12   51.08    1.22
   8  -1 -12   54.61    1.18
   8   1 -12   52.33    1.34
  -9  -1  -5   61.61    1.16
  -9  -1  -5   59.30    1.09
  -9   1  -5   64.41    1.24
   9   1   5   61.26    2.16
  -2   7   1   24.93    1.57
   2   7  -1   26.75    0.98
   2   7  -1   25.12    0.70
  -2   7   1   26.69    1.04
   2   7  -1   24.56    0.86
   2  -7  -1   24.44    0.85
  -1  -1 -13   53.58    1.69
  -1   1 -13   49.10    1.13
  -1   1 -13   48.50    1.21
   1   1  13   56.31    1.45
 -11   1   1  165.46    2.11
 -11  -1   1  169.79    1.73
   2   7   0   78.71    1.39
  -2   7   0   84.20    1.12
  -2   7   0   85.83    1.27
  -2   7   0   79.85    2.24
  -2   7   0   81.41    1.57
   2  -7   0   80.39    1.35
   2   5 -10  213.87    1.96
   2   5 -10  202.94    1.88
   2  -5 -10  207.78    3.34
  -2   5  10  212.45    2.59
  -2   5  10  212.18    3.07
   2   5 -10  212.33    1.69
  -2   5  10  212.21    2.50
   8   5  -4    6.06    0.63
  -8   5   4    4.40    0.73
   8   5  -4    5.16    0.73
  -8   5   4    4.24    1.21
   8  -5  -4    4.39    0.53
   8   5  -4    6.79    0.97
  -8  -5   4    4.96    0.53
  -6   3  -8   74.84    1.47
  -6   3  -8   76.51    1.40
   0  -2 -13   31.98    1.72
   0   2 -13   31.12    0.90
   0  -2 -13   33.78    1.08
   0   2  13   32.63    1.11
   9  -1 -11   23.44    0.86
   9   1 -11   23.99    0.93
   9   1 -11   24.75    0.98
   9   1 -11   24.17    0.93
   9   1 -11   22.44    0.96
   4   3  10   81.22    1.53
  -4   3 -10   78.57    1.53
  -4   3 -10   75.87    1.48
  -4   3 -10   76.37    1.16
  -4  -3 -10   79.34    1.49
  -9   3  -3  114.64    1.89
  -9   3  -3  116.36    1.66
   9   3   3  110.89    3.07
   4   0 -14  317.11    2.94
  -2   0  14    0.18    0.52
   1   7   2  251.75    2.51
  -1  -7  -2  239.82    2.07
  -1   7  -2  230.48    2.20
   1   7   2  229.89    2.48
   1   7   2  240.01    3.19
  -1   7  -2  235.49    2.51
  -1   7  -2  244.37    2.00
 -11   0   7    0.43    0.32
  11   0  -7   -0.14    0.66
  11   0  -7    0.12    0.56
  -3  -5  -8 1283.62    8.94
  -3   5  -8 1299.95    5.97
   3   5   8 1308.05    6.17
   3   5   8 1322.12    7.40
  -3   5  -8 1287.80    5.87
  -3   5  -8 1328.51    4.93
  -3   5  -8 1354.64    6.19
   7   0 -13    0.09    0.37
   7   0 -13    0.88    0.57
   7   0 -13   -0.02    0.58
  -8   5   1    7.56    1.17
   8  -5  -1    9.25    0.54
  -8   5   1   10.23    0.82
   8   5  -1   11.04    1.47
  -8  -5   1    8.83    0.63
   6   3 -12  748.19    4.41
  -6   3  12  751.36    4.88
   6   3 -12  758.40    3.84
   6   3 -12  763.85    4.59
   6  -3 -12  754.46    5.77
  -8   0  -7    0.25    0.51
  -3   5  10   61.06    1.83
  -3   5  10   59.51    1.40
  -3   5  10   64.88    1.24
  -3   5  10   61.78    1.53
   3   5 -10   59.03    0.94
   3  -5 -10   63.26    1.93
   3   5 -10   59.87    1.01
   3   5 -10   58.29    1.12
  -9   3   9   24.50    1.08
   9   3  -9   23.62    0.99
  -9   3   9   24.24    0.96
   9   3  -9   23.19    0.99
   9  -3  -9   23.59    1.00
   2   7  -2   10.20    0.64
  -2   7   2   10.87    1.39
   2   7  -2   10.94    0.75
  -2   7   2   12.69    0.86
   2   7  -2   11.07    0.58
   2   7  -2   10.40    0.64
   5   5   6   40.51    1.34
  -5  -5  -6   40.94    1.01
  -5   5  -6   41.77    1.16
  -5   5  -6   41.21    1.08
  -5   5  -6   40.67    1.16
   5   5   6   41.93    1.33
   5   6  -6  475.31    3.47
   5   6  -6  480.00    3.05
   5   6  -6  479.08    3.11
  -5   6   6  497.31    3.54
  -5   6   6  457.84    3.92
   5  -6  -6  483.80    2.99
  -5   6   6  496.41    3.42
   5   6  -6  486.07    3.60
  -5   6   6  506.44    5.52
   4   6  -7    9.95    0.69
   4  -6  -7   11.10    0.57
   4   6  -7   10.56    0.84
  -4   6   7   11.51    0.67
  -4   6   7    9.70    1.24
  -4   6   7   11.08    0.84
  -4   6   7   10.61    0.74
   4   6  -7   10.88    0.62
  10  -2   2   89.34    2.04
  10   2   2   87.98    2.84
 -10  -2  -2   97.93    1.50
 -10   2  -2   94.91    1.47
  -1   6  -7   42.35    1.11
  -1   6  -7   44.26    0.97
   1   6   7   42.23    1.59
   1   6   7   42.77    1.27
  -1   6  -7   41.70    1.13
  -6   6   0   34.38    1.09
   6  -6   0   37.68    0.88
  -6   6   0   35.80    0.98
  -1   5  10  160.79    2.23
  -1   5  10  161.72    2.71
   1   5 -10  161.13    1.77
   1   5 -10  161.99    1.46
   1  -5 -10  159.88    3.12
   1   5 -10  156.24    1.76
  -3   1 -12   12.92    0.72
  -3  -1 -12   15.55    0.83
  -3  -1 -12   13.06    1.15
  -3   1 -12   12.74    0.64
  -6   6   4   80.81    1.68
  -6   6   4   77.66    1.52
  -6   6   4   75.06    2.51
   6  -6  -4   78.11    1.26
   6   6  -4   80.76    1.51
   6   6  -4   79.61    1.54
  -2   7  -1   54.05    1.83
  -2   7  -1   56.26    1.08
  -2   7  -1   55.73    1.32
   2   7   1   56.10    1.36
  -2   7  -1   56.94    0.97
   2   7   1   55.20    1.19
   2  -7   1   55.68    1.16
   1   7  -3   64.69    1.09
   1   7  -3   61.86    1.25
  -1   7   3   63.98    2.02
   1  -7  -3   61.71    1.10
  11   0   0  787.78    6.52
 -11   0   0  790.25    4.90
   3  -1 -14    0.59    0.57
   3   1 -14    0.73    0.57
   3   1 -14    0.59    0.44
   3  -1 -14    0.08    0.77
 -10  -1  -3    4.94    0.47
  10   1   3    4.61    1.38
  10  -1   3    4.30    1.02
 -10   1  -3    4.68    0.49
 -10  -1  -3    5.17    0.85
   0   7   3  322.41    2.99
   0  -7  -3  310.59    2.25
   0   7  -3  320.70    2.62
   0   7  -3  321.78    2.35
   0   7   3  319.18    3.90
  -5   2 -10    5.67    0.62
  -5   2 -10    6.91    0.74
  -5   2 -10    6.88    0.53
   5   2  10    7.18    0.66
  -5  -2 -10    6.45    1.21
 -10   3   0  124.96    1.86
 -10   3   0  126.74    1.70
 -10  -3   0  127.87    2.17
  -1   3 -12  399.75    3.21
  -1   3 -12  406.44    3.18
   1   3  12  404.60    3.45
  -1  -3 -12  406.19    3.22
  -1  -3 -12  407.12    5.14
   6   2   9   -0.05    0.45
  -6   2  -9    0.31    0.53
  -6   2  -9    0.32    0.48
  -6  -2  -9    0.26    1.11
  -6   2  -9    0.12    0.45
  -6  -2  -9    0.19    0.50
  -5   4  -8  338.95    2.67
  -5  -4  -8  348.87    2.85
  -5   4  -8  338.70    2.83
   5   4   8  356.67    2.71
  -5   4  -8  353.60    3.04
  -5  -4  -8  350.81    4.65
   7   4 -10  116.37    1.79
   7   4 -10  113.77    1.27
  -7   4  10  124.82    1.95
   7  -4 -10  119.80    1.42
   7  -4 -10  122.16    2.07
   7   4 -10  117.12    1.69
   7   4 -10  117.78    1.82
  -7   4  10  122.35    2.09
   8  -5  -5  162.50    1.72
   8   5  -5  155.16    1.92
  -8   5   5  159.76    2.98
  -8  -5   5  160.03    1.78
   8   5  -5  157.06    2.08
  -8   5   5  155.07    2.14
   8   5  -5  166.25    2.30
  11  -2  -4  154.56    1.59
 -11  -2   4  152.32    1.76
 -11  -2   4  151.17    2.16
  11  -2  -4  140.87    1.89
  11   2  -4  148.58    3.10
  11  -2  -4  136.54    2.39
  -4   4  -9    5.53    0.41
  -4  -4  -9    7.60    0.61
  -4  -4  -9    6.71    1.38
  -4   4  -9    6.83    0.69
  -4   4  -9    7.35    0.72
   4   4   9    7.14    0.68
   6  -2 -13  577.62    3.53
   6  -2 -13  577.85    4.75
   5   6   3   24.16    1.31
  -5   6  -3   25.41    0.78
  -5   6  -3   24.63    0.91
  -5   6  -3   25.24    1.31
  -5   6  -3   25.02    0.81
  -5   6  -3   23.79    0.88
   4   1 -14  108.48    1.57
   4  -1 -14  112.58    2.08
 -11  -2   3  344.65    2.62
 -11   2   3  339.95    2.73
  11   2  -3  345.90    4.75
  11  -2  -3  343.23    3.77
   2   1 -14   90.40    1.58
   2  -1 -14   93.27    1.55
   2  -1 -14   91.31    1.94
  10   0 -10   57.56    1.39
  10   0 -10   55.65    1.24
  10   0 -10   59.82    1.23
  10   0 -10   56.18    1.24
  11   1  -7    1.11    0.56
  11  -1  -7    0.56    0.61
  11   1  -7    0.92    0.65
  11  -1  -7    1.44    0.54
   1   4  11   19.90    1.17
   1   4  11   20.31    1.01
  -1  -4 -11   19.93    1.80
  -1   4 -11   18.55    0.77
  -1   4 -11   18.65    0.86
  -1  -4 -11   19.58    0.79
  -1   4 -11   19.55    0.80
   7   1 -13 1328.47    6.24
   7   1 -13 1331.82    5.05
  -8  -1  -7   71.63    1.85
  -8   1  -7   73.20    1.33
  -8  -1  -7   70.53    1.24
  -8  -1  -7   72.50    1.24
   2   7  -3   11.65    0.72
  -2   7   3   12.02    0.86
  -2   7   3   12.52    1.35
   2   7  -3   11.12    0.61
   2  -7  -3   12.17    0.65
   2   7  -3   10.17    0.59
   5   0 -14  343.22    3.02
   5   0 -14  351.22    2.83
  -7  -5  -3   88.07    1.40
  -7  -5  -3   78.48    1.98
  -7   5  -3   87.63    1.61
   7   5   3   81.26    2.43
  -1   0  14 1133.44    5.57
  -4   5  10    0.28    0.50
  -4   5  10    0.82    0.50
  -4   5  10   -0.27    0.83
   4   5 -10    0.80    0.48
   4   5 -10    0.27    0.44
   4  -5 -10   -0.11    0.86
   4   5 -10    0.23    0.33
  -8   5   0   64.04    1.93
  -8  -5   0   67.06    1.22
  -8   5   0   64.93    1.44
  10  -3  -7   64.00    1.33
  10   3  -7   69.72    1.39
 -10   3   7   67.88    1.44
  10   3  -7   68.76    1.31
 -10   3   7   68.50    1.36
  10  -3  -7   67.61    1.21
  10  -3  -7   69.36    1.37
 -11  -2   5  137.74    1.66
  11   2  -5  128.41    2.70
  11  -2  -5  125.60    1.80
  11  -2  -5  132.82    1.56
  11   2  -5  130.55    1.58
  11  -2  -5  125.45    2.20
 -11  -2   5  132.43    1.98
  -9   4  -1    6.65    0.64
   9   4   1    7.35    1.71
  -9  -4  -1    5.82    0.58
  -9  -4  -1    6.49    0.87
  -9   4  -1    6.22    0.90
  -7   3  -7  204.98    2.21
  -7   3  -7  208.17    2.22
  -4   2 -11  211.40    1.83
  -4  -2 -11  215.39    3.52
  -4   2 -11  217.90    2.50
   3   3  11  191.51    2.36
  -3  -3 -11  190.52    3.60
  -3  -3 -11  191.17    2.17
  -3   3 -11  191.02    2.22
  11  -1   0   23.07    1.43
 -11   1   0   21.30    0.85
 -11  -1   0   23.54    0.70
 -11  -1   0   23.78    1.10
  11   1   0   22.87    1.65
  -2  -5  -9  245.97    3.96
   2   5   9  239.99    3.16
   2   5   9  241.15    2.63
  -2   5  -9  253.91    2.38
  -2   5  -9  249.29    2.40
   1   7   3  133.86    1.88
  -1  -7  -3  134.48    1.42
  -1   7  -3  131.75    1.87
   1   7   3  134.35    2.42
  -1   7  -3  135.52    1.50
   8   4  -9    0.23    0.63
   8   4  -9    0.61    0.63
   8  -4  -9    0.19    0.46
  -8   4   9    0.14    0.61
  -8   4   9   -0.37    0.70
   8  -4  -9    0.28    0.55
   9   4  -7   63.98    1.36
   9   4  -7   62.79    1.30
  -9   4   7   64.69    1.60
   9  -4  -7   63.89    1.16
  -9   4   7   59.98    1.40
  10  -2  -9  111.90    1.82
  10  -2  -9  125.19    1.64
  10   2  -9  125.07    1.79
  10   2  -9  111.92    1.63
 -10   2   9  115.17    1.58
  10   2  -9  111.55    1.65
   2   6  -8   29.25    0.86
  -2   6   8   30.53    1.10
   2   6  -8   27.39    0.73
  -2   6   8   29.47    1.02
   2   6  -8   30.32    0.79
  -2   6   8   31.34    1.55
 -11   2   2  864.81    4.33
 -11  -2   2  853.44    4.20
 -11  -2   2  855.94    5.34
  -3   3  13  128.45    1.99
  -3   3  13  124.91    1.69
   3  -3 -13  141.51    1.69
   3   3 -13  137.15    1.68
   2   7   2    0.21    0.48
  -2   7  -2    0.22    0.68
   2   7   2    0.03    0.61
   2  -7   2    0.12    0.51
  -2   7  -2    0.23    0.43
  -2  -7  -2   -0.12    0.41
  -2   7  -2   -0.02    0.48
  -2   7  -2    0.30    0.55
  -3   7   1  227.50    2.41
   3   7  -1  229.20    1.84
   3   7  -1  230.09    2.42
   3  -7  -1  221.86    2.02
  -3   7   1  226.64    3.61
  -6  -4  -7   19.44    0.82
  -6   4  -7   21.26    0.86
  -6  -4  -7   21.29    1.55
  -6   4  -7   22.20    0.83
   6   6   1   31.30    1.49
   6  -6   1   32.92    0.76
  -6   6  -1   30.13    1.58
  -6   6  -1   30.49    1.01
  -6   6  -1   31.99    0.91
  -1   6   8   21.56    1.43
   1   6  -8   21.11    0.80
   1   6  -8   20.57    0.69
  -1   6   8   21.45    1.03
  -1   6   8   24.25    0.89
   1   6  -8   21.01    0.76
   0   5  10   34.01    1.16
   0   5  10   35.52    1.13
   0   5 -10   35.78    0.96
   0  -5 -10   38.75    1.88
   0   5 -10   36.01    0.85
   0   5 -10   36.58    0.97
   0   5  10   34.68    1.41
   0   5 -10   36.80    0.72
  -6  -5  -5    1.59    0.47
  -6  -5  -5    2.09    1.04
  -6   5  -5    1.67    0.55
  -6   5  -5    1.81    0.70
  -6   5  -5    2.14    0.61
   6   5   5    2.55    0.61
  -6   5  -5    1.82    0.50
   6   5   5    1.36    0.88
   6  -6  -5   58.56    1.10
  -6   6   5   61.78    1.48
   6   6  -5   64.19    1.38
   6   6  -5   61.07    1.11
  -6   6   5   64.33    1.34
   6   6  -5   62.19    1.13
   6  -4 -11  377.09    2.25
   6  -4 -11  383.63    3.76
   6   4 -11  392.42    3.01
   6   4 -11  380.73    2.97
   6   4 -11  386.82    2.78
   2  -3 -13  189.65    1.99
   2   3 -13  189.98    1.98
   2   3 -13  195.53    1.88
  -7  -2  -8   68.19    2.03
  -7   2  -8   64.65    1.20
  -7  -2  -8   65.41    1.28
  -3   7   0    0.88    0.39
   3  -7   0   -0.21    0.52
   3   7   0    0.33    0.35
  -3   7   0    0.27    1.03
  -3   7   0    0.05    0.55
   3   7  -2  231.59    1.91
   3   7  -2  224.86    2.27
  -3   7   2  223.57    3.64
  -3   7   2  225.23    2.45
  -6   5   9  325.37    2.91
   6   5  -9  318.51    2.77
   6   5  -9  331.93    2.30
   6  -5  -9  332.77    2.24
   6   5  -9  317.02    2.73
  -6   5   9  333.79    3.91
  10   1 -10   11.70    0.73
  10   1 -10   12.60    0.76
  10  -1 -10   10.81    0.81
  10   1 -10   12.75    0.79
  10   1 -10   11.71    0.73
  -3  -4 -10   16.97    1.62
  -3   4 -10   16.22    0.82
  -3  -4 -10   17.71    0.75
  -3   4 -10   17.69    0.87
   3   4  10   18.30    0.88
  11   0  -8   36.79    1.14
  11   0  -8   41.12    1.06
  -3   6  -6   14.03    0.64
   3   6   6   15.59    1.03
  -3   6  -6   13.68    0.79
   3   6   6   13.94    0.74
   3   6   6   14.13    0.72
  -3   6  -6   14.64    0.75
  -4   3  13    0.64    0.56
   4   3 -13    1.26    0.49
   1   7  -4  475.54    3.14
   1   7  -4  481.77    2.88
   1   7  -4  489.94    3.22
  -1   7   4  500.69    3.68
  -1   7   4  503.05    4.95
   1  -7  -4  480.31    2.68
   5  -1 -14  131.91    2.09
   5   1 -14  134.65    1.89
   5  -1 -14  136.88    1.85
  -3   4  12    0.82    0.50
  -3   4  12    0.77    0.63
  -3   4  12    0.67    0.47
   3  -4 -12    0.93    1.15
   3   6  -8  212.04    1.94
   3   6  -8  210.18    1.85
  -3   6   8  220.76    3.32
  -3   6   8  219.54    2.51
  -3   6   8  217.38    2.37
   1  -1 -14  219.88    2.78
   1   1 -14  208.22    2.23
   1  -1 -14  223.72    2.35
   1   1 -14  217.38    2.26
  -1   1  14  205.49    2.28
  -2   4  12    1.09    0.58
   2   4 -12    2.49    0.38
  -2   4  12    1.34    0.47
   2  -4 -12    1.38    1.17
  -2   4  12    1.37    0.67
  -2   4  12    1.72    0.72
  -2   0 -13   -0.06    0.51
  -2   0 -13    0.36    0.45
  -7   5   8   13.97    1.18
   7   5  -8   14.14    0.83
   7  -5  -8   15.12    0.65
  -7   5   8   14.72    0.98
 -11  -2   6  979.60    4.57
  11  -2  -6 1003.26    4.46
  11  -2  -6  974.58    5.04
  11   2  -6 1013.82    4.66
  11  -2  -6  957.39    5.75
 -11  -2   6  996.90    5.24
  -4   6  -5    3.53    0.59
   4   6   5    4.17    0.74
   4   6   5    4.00    0.67
  -4   6  -5    3.80    0.59
   4   6   5    3.16    0.48
  -4   6  -5    4.09    0.58
  -4   6  -5    4.68    0.56
  -4   6  -5    3.72    0.50
  -8   5   6    5.55    0.81
  -8   5   6    5.30    1.04
   8  -5  -6    4.70    0.56
  -8   5   6    5.52    0.68
   8   5  -6    4.62    0.70
   8   5  -6    4.97    0.66
  -8  -5   6    4.51    0.47
   0   7   4    1.17    0.64
   0   7  -4    0.49    0.44
   0   7  -4    0.45    0.53
   0   7   4    0.20    0.87
   0  -7  -4    0.32    0.37
   8   4   4   36.32    1.86
  -8  -4  -4   40.28    1.04
  -8   4  -4   38.16    1.06
  -8   4  -4   38.07    1.20
  -8  -4  -4   39.45    1.55
   8  -2 -12  570.54    4.27
   8   2 -12  562.41    3.77
   8   2 -12  607.43    3.52
   8   2 -12  584.23    3.91
  -8   2  12  555.83    3.76
   8  -2 -12  585.52    3.15
  -9  -2  -5  340.11    2.63
  -9  -2  -5  336.03    3.71
  -9   2  -5  344.41    2.75
 -10   3  -1    3.90    0.58
 -10   3  -1    2.99    0.46
 -10  -3  -1    3.06    0.87
  10   3   1    3.52    1.39
   8   3 -11   74.89    1.47
  -8   3  11   76.58    1.53
  -8   3  11   79.42    1.51
   8  -3 -11   82.02    1.20
   8   3 -11   83.68    1.41
   8   3 -11   77.73    1.45
   8  -3 -11   79.20    1.65
   1   2  13  236.03    2.55
  -1   2 -13  229.98    2.30
  -1  -2 -13  235.02    3.53
   3  -7   1   58.57    1.07
  -3   7  -1   57.28    0.94
   3   7   1   60.04    1.31
  -3   7  -1   61.40    1.32
  -3   7  -1   57.78    1.80
   2  -7  -4   12.99    0.58
   2   7  -4   13.68    0.63
   2   7  -4   11.63    0.58
  -2   7   4   12.06    0.81
  -2   7   4   12.87    1.34
   2   7  -4   12.77    0.73
   3  -7  -3    8.69    0.60
  -3   7   3    8.71    0.73
  -3   7   3    9.57    1.39
   3   7  -3    8.40    0.56
   3   7  -3   10.07    0.68
   3   7  -3    9.40    0.55
 -11  -2   1  285.94    2.29
 -11  -2   1  282.60    2.98
  11   0   1    0.40    1.06
 -11   0  -1   -0.09    0.58
   0   6   8  451.08    3.10
   0   6  -8  484.21    3.22
   0   6  -8  489.25    3.13
   0   6   8  473.84    3.66
   0   6   8  451.48    4.39
   0   6  -8  489.28    2.77
   5  -6  -7    0.93    0.41
   5   6  -7    0.85    0.41
  -5   6   7    0.81    0.46
   5   6  -7    0.69    0.56
  -5   6   7    0.86    0.48
  -5   6   7    1.96    1.13
  -5   6   7    0.26    0.62
   9   2 -11   73.07    1.35
  -9   2  11   67.98    1.31
   9   2 -11   70.49    1.42
   9   2 -11   61.38    1.32
   9  -2 -11   62.82    1.49
   9  -2 -11   69.09    1.18
  -2   6  -7   55.00    1.18
  -2   6  -7   52.15    0.97
   2   6   7   55.08    1.65
   2   6   7   56.78    1.29
  -2   6  -7   54.51    1.00
  -1   3  13  653.05    4.04
   1   3 -13  689.62    3.77
   1  -3 -13  706.03    3.87
   1  -3 -13  671.51    5.86
  -4   4  12   55.38    1.37
   4  -4 -12   55.45    1.85
  -4   4  12   54.22    1.20
   8   5   1  132.40    2.92
  -8  -5  -1  141.66    1.69
  -8  -5  -1  131.81    2.20
  -8   5  -1  134.89    1.89
  -8   5  -1  135.10    2.37
  -6   0 -10    8.39    0.53
  -6   0 -10    7.12    0.56
  11  -1  -8  335.99    3.02
  11   1  -8  335.46    2.64
   1   4 -12   12.76    0.62
   1  -4 -12   12.51    1.38
  -1   4  12   12.18    0.88
   1   4 -12   13.47    0.59
  -1   4  12   13.42    0.79
  -5   5  10  354.44    3.82
   5  -5 -10  350.95    3.38
   5   5 -10  346.66    2.61
  -5   5  10  348.83    2.85
   5   5 -10  351.01    2.68
  -5   0 -11   -0.13    0.40
  -5   0 -11    0.31    0.43
   6   0 -14    1.28    0.53
   6   0 -14    1.77    0.47
 -10   0  -4   13.27    0.83
 -10   0  -4   10.68    0.52
  10   0   4   12.25    1.24
   2   7   3  215.52    2.19
  -2   7  -3  216.50    1.99
  -2   7  -3  220.03    1.82
   2   7   3  214.13    2.26
   2   7   3  211.23    2.64
  -9   0  -6  293.31    2.30
  -2   1 -13  346.87    2.54
  -2   1 -13  347.59    2.73
   0   0 -14   40.69    1.06
   3   2  12   67.38    1.40
  -3   2 -12   63.22    1.41
  -3  -2 -12   67.49    2.10
  -3   2 -12   66.12    1.29
  -3  -2 -12   65.24    1.33
   7   3 -12    0.81    0.57
   7  -3 -12    0.21    0.30
   7   3 -12    0.72    0.53
   7   3 -12    0.78    0.47
  -7   3  12    1.73    0.61
  -7   3  12    0.40    0.55
   7  -3 -12   -0.05    0.75
  -9   3  -4  103.15    1.44
  -9   3  -4  105.14    1.61
   9  -3   4  103.90    1.85
   9   3   4  108.78    2.77
   3   2 -14    8.67    0.64
  -3   2  14    7.49    0.62
   3  -2 -14    7.81    0.99
   3  -2 -14    8.46    0.62
  10   2   3   36.56    1.90
 -10  -2  -3   40.63    0.94
 -10   2  -3   39.51    0.94
 -10  -2  -3   40.32    1.40
  10  -2   3   38.56    1.40
  -7  -4  -6   20.31    1.44
  -7   4  -6   17.86    0.80
  -7  -4  -6   19.60    0.80
  -7   4  -6   18.73    0.82
   5  -3 -13  200.52    2.91
   5   3 -13  199.05    1.94
   9   0 -12   53.84    1.20
   9   0 -12   54.05    1.23
   9   0 -12   56.28    1.19
   9   0 -12   56.54    1.11
  -1   7  -4 1162.13    4.51
  -1   7  -4 1133.38    4.97
   1   7   4 1118.28    5.42
   1  -7   4 1104.89    4.66
   1   7   4 1126.47    6.78
  -1   7  -4 1119.25    5.20
   1   7   4 1168.98    5.04
 -10   3   8  213.73    2.19
 -10   3   8  214.28    2.37
  10  -3  -8  213.65    1.98
  10   3  -8  199.35    2.08
  10  -3  -8  203.92    2.23
  -6   6  -2  160.62    1.98
  -6   6  -2  157.44    1.74
  -6   6  -2  166.49    2.61
   6   6   2  164.62    2.66
   9   3 -10  259.70    2.52
   9  -3 -10  264.74    2.18
   9  -3 -10  262.55    2.69
  -9   3  10  267.00    2.69
  -9   3  10  261.05    2.51
  -4   6   8   19.62    0.68
   4   6  -8   22.43    0.78
   4   6  -8   20.42    0.69
   4  -6  -8   19.65    0.56
  -4   6   8   21.68    1.36
  -4   6   8   19.29    0.78
   4   6  -8   20.04    0.87
  -4   6   8   19.64    0.91
   4   6  -8   18.65    0.65
   6  -6  -6  268.03    2.06
   6   6  -6  268.38    2.50
   6   6  -6  267.64    2.03
  -6   6   6  269.21    2.88
  -6   6   6  273.19    3.87
   6   6  -6  275.79    2.20
   6   6  -6  264.48    2.49
  -6   6   6  265.72    2.50
 -11  -1  -1   43.77    1.26
  11  -1   1   39.55    1.60
 -11  -1  -1   41.74    0.83
  11   1   1   41.61    1.95
  -5   6  -4   47.43    1.10
  -5   6  -4   46.77    1.09
   5   6   4   44.57    1.36
  -5   6  -4   50.75    0.98
  -5   6  -4   48.17    1.31
  -5   6  -4   49.05    1.01
  -7   0  -9    0.93    0.46
  -9  -4  -2   97.37    1.46
   9   4   2   93.99    2.75
  -9   4  -2   91.71    1.65
  -9  -4  -2   91.92    2.01
  -9   4  -2   87.56    1.46
   4   2 -14  142.52    1.49
   4   2 -14  142.87    1.79
   4  -2 -14  142.73    2.37
   4  -2 -14  148.95    1.76
  -4   2  14  141.49    1.82
  -2   2  14  636.77    3.77
   2  -2 -14  622.73    3.65
   2  -2 -14  654.79    5.27
   2   2 -14  665.85    3.74
   2   2 -14  661.90    3.75
  11  -2  -7  104.25    1.41
  11   2  -7  105.11    1.50
 -11  -2   7  101.96    1.59
  11  -2  -7  100.14    1.60
  -8   3  -6    8.17    0.58
  -8   3  -6    7.89    0.66
  -1   5 -10  643.28    3.61
  -1   5 -10  626.61    3.66
  -1   5 -10  624.94    2.70
  -1  -5 -10  633.77    5.87
   1   5  10  635.38    4.95
  -1   5 -10  635.37    3.44
   1   5  10  635.72    4.02
  -9   4   8  141.83    1.92
  -9   4   8  142.56    2.12
   9   4  -8  145.32    1.80
   9  -4  -8  144.72    1.59
   8   0 -13    0.10    0.48
   8   0 -13   -0.23    0.60
   8   0 -13    0.20    0.47
  -6   1 -10   67.99    1.14
  -6  -1 -10   66.06    1.22
  -2  -3 -12    6.37    0.61
  -2   3 -12    4.65    0.60
  -2  -3 -12    5.26    1.23
   7   2 -13  201.46    2.20
  -7   2  13  199.80    2.23
   7   2 -13  205.03    1.73
   3   7   2   10.34    0.56
  -3   7  -2   10.45    0.58
  -3   7  -2    8.54    0.87
  -3   7  -2    9.46    0.52
  -3   7  -2   10.29    0.70
   3   7   2   10.30    0.73
   3  -7   2    9.02    0.55
  -8  -2  -7  119.32    2.37
  -8  -2  -7  125.74    1.63
  -8   2  -7  120.50    1.58
  -3   7   4  115.24    1.69
   3   7  -4  113.53    1.37
   3  -7  -4  110.36    1.31
  -3   7   4  115.25    2.61
  -5  -1 -11  116.79    1.57
  -5   1 -11  111.85    1.44
  -5   1 -11  113.59    1.37
   5   1  11  116.25    1.63
   6   1 -14   10.58    0.68
   6   1 -14    8.07    0.72
   6  -1 -14    8.47    0.72
   6  -1 -14   10.57    0.68
 -10  -1  -4   11.04    0.53
  10   1   4   10.20    1.22
 -10  -1  -4   10.93    0.92
 -10   1  -4   10.96    0.56
  10  -1   4   10.37    1.07
  -2   4 -11  619.75    3.72
  -2  -4 -11  632.55    3.58
  -9  -1  -6  573.07    3.10
  -9  -1  -6  581.18    4.47
  -9  -1  -6  571.47    3.13
   0  -1 -14   65.21    1.28
   0   1  14   67.57    1.36
   0   1 -14   67.04    1.27
   0   1 -14   66.39    1.21
   4  -7  -1  352.67    2.40
  -4   7   1  352.69    2.81
  -4   7   1  355.47    4.36
   7   6  -2  237.08    2.86
   7  -6  -2  231.28    1.89
  -7   6   2  236.93    2.40
  -7   6   2  227.95    3.50
  -7   5  -4    0.65    0.63
  -7  -5  -4    0.70    0.42
  -7   5  -4    1.61    0.60
  -7  -5  -4    0.35    0.92
   7   5   4    0.54    0.94
   4   5   8  179.39    2.52
  -4  -5  -8  187.02    1.81
   4   5   8  186.01    1.95
  -4   5  -8  194.53    2.04
  -4   5  -8  187.96    2.06
  -4   5  -8  191.62    2.05
  -4  -5  -8  175.89    3.18
  11  -2   0  514.25    4.44
 -11  -2   0  535.03    4.07
  11   2   0  522.25    5.66
 -11  -2   0  534.29    3.10
  -1   7   5   93.31    1.59
   1   7  -5   86.42    1.28
   1   7  -5   87.96    1.35
   1   7  -5   89.46    1.21
  -1   7   5   83.57    2.10
   1  -7  -5   83.24    1.01
  -4   7   2   26.41    0.89
  -4   7   2   26.93    1.55
   4   7  -2   27.15    0.87
   4   7  -2   30.62    0.79
   4  -7  -2   27.43    0.77
   7   6  -3  518.41    3.24
   7   6  -3  518.13    3.91
  -7   6   3  513.00    3.49
  -7   6   3  515.06    5.27
   7   6  -3  521.61    3.44
  -4   0 -12  248.01    2.17
 -10  -4   3   88.53    1.58
 -10  -4   3   91.09    1.36
 -10   4   3   92.73    1.48
  10  -4  -3   91.02    1.12
  10   4  -3   93.35    2.40
  -8  -5   7    0.90    0.37
  -8   5   7    0.63    0.60
   8  -5  -7    0.80    0.44
  -8   5   7   -0.04    0.69
   8   5  -7    0.25    0.61
   8   5  -7    0.72    0.54
  -5   4  12   64.81    1.43
   5  -4 -12   64.41    1.65
   5   4 -12   66.86    1.12
  -5   4  12   66.10    1.30
   5   4 -12   65.47    1.10
   9  -1 -12   12.42    0.74
   9   1 -12   14.03    0.69
   9  -1 -12   13.37    0.79
   9   1 -12   13.65    0.65
   9  -1 -12   13.37    0.65
   9   1 -12   14.02    0.81
   9   1 -12   13.39    0.72
   5   5   7  160.82    2.22
  -5   5  -7  160.71    1.88
  -5   5  -7  154.82    1.66
  -5  -5  -7  162.05    1.70
  -5   5  -7  161.08    1.84
  10  -4  -4  176.59    1.60
  10   4  -4  180.54    2.92
 -10  -4   4  180.47    1.84
 -10   4   4  177.68    1.98
   1   6   8 1153.59    5.65
  -1   6  -8 1149.66    5.15
  11   0  -9   -0.14    0.53
   2  -7  -5    5.82    0.44
   2   7  -5    6.70    0.51
  -2   7   5    6.71    1.18
  -2   7   5    7.25    0.72
  -4   7   0  150.74    2.73
   4  -7   0  154.28    1.55
  -4   7   0  156.24    1.38
  -4   7   0  153.91    1.87
  -7  -1  -9    1.49    0.45
  -7  -1  -9    1.19    0.70
   7   6  -1   28.04    1.29
  -7   6   1   25.90    0.93
   7  -6  -1   27.86    0.69
   0   3  13   55.47    1.25
   0   3  13   53.32    1.31
   0  -3 -13   55.13    1.91
   0   3 -13   54.53    1.10
  10   0 -11    0.02    0.51
  10   0 -11    0.25    0.43
  10   0 -11   -0.16    0.49
  10   0 -11    0.44    0.50
   0   4  12   15.94    0.81
   0   4  12   14.92    0.91
   0   4 -12   14.34    0.69
   0  -4 -12   16.58    1.47
   0   4 -12   15.87    0.65
  10   2 -10   87.27    1.27
  10   2 -10   84.55    1.38
  10  -2 -10   86.20    1.49
   0   7  -5   29.38    0.85
   0   7   5   27.66    1.34
   0   7  -5   27.17    0.75
 -10  -4   2  590.90    4.10
 -10   4   2  590.28    3.64
  10   4  -2  599.42    5.83
   8   1 -13   43.87    1.13
   8  -1 -13   46.73    0.85
   8   1 -13   47.37    1.15
   8   1 -13   48.09    0.92
   8  -1 -13   45.38    0.96
   8  -1 -13   46.61    1.22
  -8   1  13   44.43    1.02
  -4   7   3  211.11    2.11
  -4   7   3  207.78    3.40
   5  -2 -14   36.90    0.89
   5   2 -14   36.06    0.90
   5  -2 -14   36.71    1.27
   5   2 -14   36.53    0.99
  -7   6   4   90.37    1.48
   7  -6  -4   90.37    1.20
  -7   6   4   87.74    2.29
   7   6  -4   87.16    1.39
   7   6  -4   89.36    1.39
   7   6  -4   87.59    1.48
   1  -2 -14  539.18    3.44
   1   2 -14  543.72    3.36
   1   2 -14  541.30    3.17
   2  -5 -11  681.78    5.37
  -2   5  11  678.52    4.09
  -2   5  11  705.93    4.37
  -2   5  11  710.00    5.05
  -3   5  -9   35.26    0.98
   3   5   9   33.27    0.81
  -3   5  -9   35.19    0.93
  -3  -5  -9   34.00    1.74
  -8   5  -2  266.11    2.94
  -8  -5  -2  251.34    3.02
  -8  -5  -2  266.44    2.20
   8   5   2  254.22    3.64
  -8   5  -2  260.72    2.46
   7  -4 -11  219.71    1.67
   7  -4 -11  218.04    2.46
   7   4 -11  220.80    2.19
  -7   4  11  222.30    2.35
  -7   4  11  214.19    2.44
   7   4 -11  227.10    2.04
  -8   4  10  452.29    3.58
  -8   4  10  453.27    3.31
   8  -4 -10  453.14    3.32
   8   4 -10  418.59    2.21
   8   4 -10  403.23    3.02
   8   4 -10  448.58    3.00
   8  -4 -10  468.86    2.68
 -10  -3  -2  118.56    1.52
 -10  -3  -2  117.31    2.08
  10  -3   2  119.34    2.07
  10   3   2  117.85    3.03
 -10   3  -2  118.52    1.58
  10   4  -5   25.50    0.73
 -10  -4   5   28.27    0.81
  10   4  -5   24.01    0.77
  10   4  -5   22.86    1.02
  10  -4  -5   26.94    0.74
 -10   4   5   24.87    0.85
  -3   5  11  174.33    1.68
  -3   5  11  179.17    2.60
  -3   5  11  177.17    1.99
  -5   3 -10   76.41    1.30
  -5   3 -10   66.23    1.25
  -5   3 -10   74.00    1.03
  -5  -3 -10   75.05    2.18
   5   3  10   63.52    1.10
  -5  -3 -10   71.89    1.30
  -4  -1 -12  564.09    3.49
   4   1  12  567.50    3.67
 -11   0  -2   10.98    0.74
  11   0   2   11.09    1.26
   2   7   4   16.98    0.71
   2   7   4   15.53    0.94
  -2   7  -4   17.22    0.68
  -2   7  -4   17.31    0.61
   2   7   4   16.81    0.73
   2  -7   4   17.82    0.62
  -6  -3  -9  184.87    1.97
  -6  -3  -9  182.25    3.09
  -6   3  -9  187.69    1.75
  -6   3  -9  187.70    1.96
  -8   0  -8   27.82    0.80
   7   5  -9   29.80    0.93
  -7   5   9   28.19    1.08
   7   5  -9   27.99    0.69
   7  -5  -9   28.53    0.72
  -7   5   9   27.76    0.93
  11   1  -9  128.00    1.60
  11  -1  -9  127.10    1.56
 -11  -3   4   20.25    0.87
  11   3  -4   18.92    1.36
  11  -3  -4   16.69    0.97
   4   7   1    7.24    0.68
  -4   7  -1    7.11    0.45
  -4   7  -1    7.50    0.62
  -4   7  -1    6.80    0.95
   4  -7   1    7.10    0.48
   7  -6   0   28.93    0.64
  -7   6   0   28.91    0.94
  12   0  -4 1074.93    6.77
 -12   0   4 1102.35    5.33
  -2   6   9  207.94    2.25
   2   6  -9  223.20    1.90
  -2   6   9  219.34    3.01
   2   6  -9  206.18    1.61
  -2   6   9  218.15    2.26
  -6   3  13   47.87    1.15
   6   3 -13   47.23    1.02
   6   3 -13   46.34    1.04
  -6   3  13   49.44    1.15
   6  -3 -13   48.70    1.43
   6   5   6   10.10    0.69
  -6  -5  -6    9.97    1.14
  -6   5  -6   10.17    0.66
  -6   5  -6   10.31    0.59
  -6  -5  -6   10.82    0.58
  11   3  -3    1.33    1.12
 -11  -3   3    1.44    0.54
  11  -3  -3    2.12    0.77
  10   1 -11   27.32    0.83
  10   1 -11   31.25    0.96
  10   1 -11   27.62    0.87
  10  -1 -11   32.09    0.87
   1  -5 -11  167.48    2.78
  -1   5  11  162.74    2.37
  -1   5  11  170.44    2.04
  -1   5  11  165.22    2.02
   1   5 -11  164.80    1.54
 -10  -4   1   89.39    1.32
 -10  -4   1   83.79    1.62
 -10   4   1   85.48    1.36
 -10   4   1   84.34    1.41
   3   7   3    2.35    0.42
  -3   7  -3    2.89    0.48
  -3   7  -3    2.50    0.43
   3  -7   3    2.42    0.40
  -3   7  -3    2.90    0.57
   3   7   3    2.99    0.56
   9  -5  -3  183.26    1.56
   9   5  -3  190.54    2.72
  -9   5   3  185.65    2.07
  -9   5   3  185.73    2.54
  -9  -5   3  185.56    1.76
   3   7  -5  399.74    2.44
   3  -7  -5  396.07    2.32
   6   5 -10    0.91    0.32
   6  -5 -10    0.94    0.48
   6   5 -10    1.24    0.49
   6   5 -10    1.15    0.50
  -6   5  10    1.12    0.48
  -6   5  10    1.26    0.63
   6  -5 -10    0.95    0.29
   5   6  -8  462.77    3.13
  -5   6   8  460.20    2.95
  -5   6   8  472.16    4.61
  -5   6   8  454.07    3.47
   5   6  -8  431.01    2.80
   5   6  -8  467.38    2.64
   5   6  -8  429.55    2.33
   5  -6  -8  454.52    2.38
  11  -2  -8    4.63    0.53
 -11  -2   8    4.40    0.54
  11  -2  -8    4.39    0.58
  -6   6  -3    4.52    0.54
   6   6   3    4.75    0.79
  -6   6  -3    5.35    0.52
  -6   6  -3    4.12    0.75
  12   0  -3    0.69    0.95
 -12   0   3    0.08    0.52
  12   0  -5   -0.16    0.86
  -4   6  -6    8.09    0.55
   4   6   6    8.07    0.79
   4   6   6    8.14    0.55
  -4   6  -6    7.96    0.65
  -4   6  -6    7.76    0.53
  -4   6  -6    8.27    0.62
   4   6   6    7.35    0.47
  -6   6   7  167.30    1.87
   6   6  -7  172.50    1.87
  -6   6   7  168.20    2.14
   6   6  -7  175.16    1.94
   6  -6  -7  169.15    1.52
  -6   6   7  168.01    2.90
   7   0 -14 1100.97    4.62
  -7   0  14 1115.10    4.80
   1   6  -9   15.73    0.57
  -1   6   9   17.42    0.81
   1   6  -9   16.39    0.54
   1   6  -9   16.70    0.67
  -1   6   9   16.29    0.71
  -1   6   9   18.24    1.18
   9  -5  -2  202.73    1.54
  -9   5   2  206.63    2.60
  -9   5   2  201.71    2.14
  -9  -5   2  201.81    1.84
   9   5  -2  203.36    3.01
  -3   6  -7   70.72    1.28
  -3   6  -7   67.43    1.01
  -3   6  -7   66.41    1.09
   3   6   7   66.45    1.61
  -3   6  -7   66.88    1.18
   1   7   5  357.17    2.78
  -1   7  -5  359.19    2.26
   1   7   5  359.56    3.62
  -1   7  -5  352.14    2.52
  -1   7  -5  354.17    2.63
  -9   5   4   23.09    0.83
  -9   5   4   21.60    1.06
   9  -5  -4   21.61    0.64
   9   5  -4   21.83    0.78
   9   5  -4   20.66    0.98
  -9  -5   4   21.57    0.67
   4  -5 -11   88.26    1.76
  -4   5  11   89.88    1.79
  -4   5  11   90.69    1.31
  11   3  -5  115.59    2.16
 -11  -3   5  118.80    1.67
  -2  -2 -13  543.01    4.71
   2   2  13  543.87    3.58
  -2   2 -13  523.03    3.23
  -2  -2 -13  527.63    3.38
   4  -7  -4   11.41    0.55
   4   7  -4   11.34    0.62
  -4   7   4   11.95    0.68
   1   0  14  752.11    4.29
  -1   0 -14  725.54    3.83
  -5  -4  -9   46.45    1.00
   5   4   9   42.52    0.87
  -5   4  -9   44.76    1.01
  -5   4  -9   43.62    0.76
  -5  -4  -9   44.09    1.83
  -3   6   9    1.42    0.52
  -3   6   9    1.39    0.89
   3   6  -9    1.42    0.38
   3   6  -9    1.28    0.34
  -3   6   9    1.81    0.55
   7  -6  -5    4.74    0.48
  -7   6   5    4.90    0.57
   7   6  -5    5.03    0.44
   7   6  -5    5.69    0.58
  -7   6   5    4.80    0.66
   7   6  -5    5.31    0.66
  -7   6   5    4.60    1.05
   7   6  -5    4.59    0.45
  -4  -3 -11   70.15    1.26
  -4   3 -11   72.43    1.26
   4   3  11   71.47    1.25
  -4  -3 -11   69.11    2.10
  -8  -4  -5 1527.69    8.14
   8   4   5 1529.07    7.99
  -8   4  -5 1543.75    6.02
 -10   3   9  176.04    1.86
  10  -3  -9  175.43    1.72
 -10   3   9  173.95    1.88
  10   3  -9  175.03    1.86
 -10  -4   6   79.51    1.19
  10   4  -6   78.88    1.19
  10  -4  -6   79.99    1.12
 -10   4   6   76.51    1.32
  10   4  -6   78.50    1.22
  11   3  -2  165.14    3.15
 -11  -3   2  167.01    1.69
 -11  -3   2  167.12    2.14
 -11  -1  -2  434.46    3.48
  11   1   2  425.77    4.80
  -8  -1  -8 1237.81    4.69
  -8   1  -8 1274.18    4.98
  11  -2   1   54.68    1.59
 -11  -2  -1   58.72    1.01
  11   2   1   57.09    2.05
  -3   0 -13    0.80    0.43
  -7  -3  -8    7.99    1.18
  -7  -3  -8    7.55    0.59
  -7   3  -8    7.51    0.52
  -7   3  -8    7.46    0.54
  -6   4  -8   57.47    0.98
  -6   4  -8   62.86    1.19
  -6  -4  -8   60.78    1.11
  -6  -4  -8   64.84    1.97
  -6   4  -8   58.40    1.07
  -4  -4 -10   77.93    2.17
  -4  -4 -10   75.00    1.23
   4   4  10   79.62    1.28
  -4   4 -10   81.65    1.35
  -4   4 -10   76.54    1.30
 -12   1   4   -0.08    0.49
 -12  -1   4   -0.01    0.25
  12   1  -4   -0.18    0.95
  12  -1  -4   -0.11    0.75
 -12  -1   4   -0.01    0.58
  -9   4  -3    5.99    0.65
  -9   4  -3    6.38    0.54
  -9  -4  -3    5.87    0.92
  -9  -4  -3    6.06    0.53
   9  -4   3    5.69    0.65
   9   4   3    6.08    1.14
  12   0  -2    3.64    1.00
 -12   0   2    4.47    0.60
   3   0 -15    0.36    0.50
  -6   2 -10  195.34    1.72
  -6  -2 -10  198.79    1.93
  -6   2 -10  200.72    1.83
  12   0  -6  753.17    4.33
  12   0  -6  778.54    3.46
   6   4 -12  565.57    2.84
  -6   4  12  573.06    3.85
   6   4 -12  569.56    3.16
   6  -4 -12  570.79    4.13
  -6   4  12  566.86    3.50
  -9   4   9 1025.10    5.31
   9  -4  -9  996.60    4.44
   9   4  -9 1014.33    4.71
  -9   4   9 1040.38    4.88
   9   4  -9 1062.95    4.64
  -9   5   1    2.68    0.69
   9   5  -1    2.90    1.02
  -9  -5   1    3.26    0.43
  -9   5   1    3.57    0.55
   2   5  10  216.96    2.69
   2   5  10  217.22    2.20
  -2   5 -10  214.93    1.91
   2   5  10  224.31    2.10
  -2  -5 -10  213.53    3.30
  -2   5 -10  220.95    1.99
  12   1  -3    6.13    1.13
 -12   1   3    6.24    0.58
  12  -1  -3    5.43    0.91
   9   5  -5    1.37    0.52
   9   5  -5    1.05    0.43
   9  -5  -5    0.96    0.39
  -9   5   5    1.24    0.62
  -9  -5   5    1.14    0.38
  -9   5   5    0.99    0.52
  -5   6  -5   84.11    1.30
  -5   6  -5   82.29    1.27
  -5   6  -5   83.83    1.27
   5   6   5   84.87    1.46
  -5   6  -5   85.03    1.23
  12   1  -5  577.45    4.87
 -12   1   5  582.30    3.50
 -12  -1   5  573.95    3.70
  12  -1  -5  572.09    4.42
   4   0 -15    0.02    0.49
   4   0 -15   -0.22    0.41
   7  -1 -14   77.66    1.22
   7   1 -14   80.70    1.35
   7   1 -14   76.19    1.32
   7  -1 -14   76.61    1.35
  -7   1  14   77.48    1.25
   8  -5  -8  451.58    2.57
  -8   5   8  468.81    3.64
   8   5  -8  471.19    3.00
  -8   5   8  442.16    3.15
   8   5  -8  450.28    3.06
  -5   2 -11   52.69    0.83
  -5  -2 -11   53.65    1.70
  -5   2 -11   54.63    1.01
   6  -2 -14  145.13    2.01
   6   2 -14  144.97    1.63
  -6   2  14  147.22    1.80
   6   2 -14  143.11    1.73
 -10   2  -4   20.09    0.65
 -10  -2  -4   21.62    1.06
  10   2   4   19.65    1.36
 -10  -2  -4   21.07    0.67
  -9  -2  -6   12.15    0.59
  -9   2  -6   11.79    0.60
  -9  -2  -6   12.85    1.01
   1   7  -6 1066.29    4.05
  -1   7   6 1074.14    6.62
  -1   7   6 1080.24    5.05
   1   1  14   42.51    1.10
  -1   1 -14   44.15    0.99
  -1   1 -14   44.93    0.89
   0  -2 -14  590.76    3.42
   0   2  14  582.88    3.56
   0  -2 -14  589.17    4.54
 -11  -3   6   76.33    1.27
  11   3  -6   74.55    1.08
  -2   6  -8    0.44    0.27
   2   6   8    0.81    0.51
  -2   6  -8    0.41    0.47
   2   6   8    0.15    0.72
  -2   6  -8    0.58    0.47
  -2   6  -8    0.56    0.37
  -4   7  -2    2.41    0.67
  -4   7  -2    3.07    0.52
   4  -7   2    3.96    0.39
   4   7   2    4.63    0.63
  -4   7  -2    2.71    0.40
   7   6   1   12.82    1.03
  -7   6  -1   12.52    0.67
   0   6  -9  161.87    1.35
   0   6  -9  160.86    1.62
   0   6   9  164.23    1.95
  -2   7   6  115.28    1.61
   2   7  -6  104.41    1.34
   2   7  -6  112.18    1.24
   2  -7  -6   99.91    0.98
 -10   4   0   71.31    1.24
 -10  -4   0   71.92    1.15
  10   4   0   68.54    2.18
  -1  -4 -12   29.34    0.74
  -1  -4 -12   30.97    1.62
  -1   4 -12   29.84    0.78
   1   4  12   27.29    1.06
   1   4  12   29.58    0.94
   0   5 -11  267.17    2.10
   0  -5 -11  278.16    3.47
   0   5 -11  269.28    2.00
   0   5  11  289.61    2.57
   0   5  11  280.29    2.50
   0   5  11  280.43    3.04
   8  -3 -12   82.67    1.51
  -8   3  12   78.17    1.32
  -8   3  12   84.90    1.37
   8  -3 -12   80.46    0.99
   8   3 -12   84.57    1.19
   8   3 -12   85.08    1.39
   9   2 -12   46.00    1.10
   9  -2 -12   47.26    0.88
   9   2 -12   52.16    1.03
   9  -2 -12   49.75    1.16
   9   2 -12   45.31    1.07
  -9   2  12   47.95    0.99
 -10   0  -5    0.04    0.31
  -9   3  -5  116.97    1.48
   9   3   5  112.91    2.26
  -1  -3 -13  346.54    3.88
   1   3  13  325.17    2.89
  -1  -3 -13  348.61    2.51
   1   3  13  352.78    2.72
  -1   3 -13  333.21    2.48
  -4   6   9   12.74    0.73
  -4   6   9   13.12    0.61
   4   6  -9   15.86    0.53
  -4   6   9   14.77    1.10
  11  -3  -1   51.34    1.46
 -11  -3   1   53.93    1.32
 -11  -3   1   54.45    0.99
  -3   1 -13  156.27    1.67
  -3  -1 -13  151.81    1.71
  -7  -2  -9    6.08    0.96
  -7  -2  -9    6.50    0.51
  -7   2  -9    5.80    0.46
   9   3 -11   83.56    1.36
   9  -3 -11   84.22    1.13
  -9   3  11   84.84    1.32
   9   3 -11   84.43    1.26
   9  -3 -11   80.04    1.41
   5  -7  -2  280.17    1.96
  -5   7   2  278.55    2.22
   5   7  -2  284.26    1.85
   5   7  -2  277.47    2.28
  -5   7   2  272.54    3.56
 -12   1   2    2.59    0.44
  12   1  -2    1.59    1.07
   3   1 -15    4.62    0.53
   3  -1 -15    5.34    0.56
   0   7  -6    5.52    0.48
   0   7  -6    6.33    0.56
   0   7   6    5.75    0.90
   0   7  -6    6.12    0.47
  -5   7   1   31.55    1.46
   5  -7  -1   33.18    0.74
  -5   7   1   31.49    0.82
   5   7  -1   31.71    0.91
  -8   2  13  101.77    1.43
   8   2 -13  100.62    1.17
  12  -1  -6    6.02    0.59
  12  -1  -6    5.67    0.45
 -12  -1   6    6.76    0.62
 -12  -1   6    5.41    0.36
  11   0 -10   54.19    1.15
  11   0 -10   57.49    1.08
   4   7  -5  165.49    1.60
   4  -7  -5  169.52    1.45
  -4   7   5  166.96    2.87
  -4   7   5  169.51    1.77
   5  -5 -11  171.80    2.09
  -5   5  11  174.72    2.12
  -5   5  11  173.96    1.76
  -8  -5  -3  237.61    1.96
  -8   5  -3  224.97    2.28
  -8  -5  -3  219.57    2.73
  -8   5  -3  233.21    2.16
   8   5   3  220.57    2.93
   7   6  -6   49.10    1.04
  -7   6   6   49.98    1.06
  -7   6   6   49.70    1.21
  -7   6   6   47.64    1.64
   7   6  -6   49.75    0.89
  -7  -5  -5  909.37    4.02
   7   5   5  909.47    5.12
  -7   5  -5  917.26    4.40
  -7  -5  -5  909.21    6.02
   4   1 -15   36.18    0.94
   4  -1 -15   36.90    0.90
   5   0 -15   -0.10    0.47
   5   0 -15   -0.05    0.46
  10   4  -7  143.92    1.56
  10   4  -7  143.06    1.58
 -10   4   7  143.33    1.70
 -12   0   1    0.39    0.50
  12   0  -1    1.24    0.91
  -3  -3 -12  529.12    4.89
   3   3  12  525.77    3.27
  -3   3 -12  537.90    3.19
  -3  -3 -12  535.18    3.20
   5   7  -3   14.13    0.62
   5   7  -3   13.88    0.51
  -5   7   3   15.00    0.62
   5  -7  -3   13.38    0.55
   5   7  -3   13.28    0.51
  -7   4  -7    0.24    0.40
  -7  -4  -7    0.33    0.41
  -7  -4  -7    0.04    0.97
  -7   4  -7    0.40    0.41
  -3  -4 -11  123.71    1.45
   3   4  11  120.88    1.58
  12   0  -7    0.86    0.52
  12   0  -7    0.25    0.40
  -9   5   0   73.59    1.45
  -9   5   0   70.27    1.22
  -3   3  14  307.47    2.38
  -3   3  14  297.09    2.56
   3   7   4  137.99    1.56
  -3   7  -4  139.69    1.63
  -2   7  -5    2.28    0.42
  -2   7  -5    1.94    0.45
   2   7   5    1.61    0.59
   2   7   5    1.32    0.44
   2   7   5    2.03    0.36
  10  -3   3  244.92    2.63
 -10  -3  -3  256.86    2.88
 -10  -3  -3  262.36    2.07
  10   3   3  248.58    3.56
 -10   3  -3  262.32    2.08
  -4   2 -12    5.20    0.46
   4   2  12    6.10    0.57
  -4  -2 -12    5.47    0.87
   3   7  -6  113.94    1.32
   3  -7  -6  114.29    1.09
  -3   7   6  116.94    1.52
  -3   7   6  112.61    2.36
  -9   5   6   26.90    0.94
   9  -5  -6   25.54    0.69
   9   5  -6   24.92    0.79
   9   5  -6   25.57    0.74
  -9  -5   6   22.95    0.65
  -9   5   6   25.58    0.85
  -3   4  13  265.03    2.49
   3  -4 -13  283.52    3.18
  -3   4  13  277.83    2.11
  -3   4  13  265.61    2.09
  -9   0  -7    0.29    0.36
   2   1 -15  104.01    1.42
   2  -1 -15  106.31    1.44
 -10   1  -5  110.37    1.22
 -10  -1  -5  102.19    1.71
  -5   7   0  147.36    1.58
  -5   7   0  125.96    1.32
   5  -7   0  154.13    1.38
   5   7   0  130.26    1.67
  -5   7   0  147.10    2.40
  11  -2  -9    1.88    0.46
  11   2  -9    1.87    0.48
  11  -2  -9    1.46    0.47
 -11  -2   9    2.01    0.42
  -2   4  13  303.05    2.63
  -2   4  13  296.60    2.32
   9   0 -13    0.08    0.34
   9   0 -13   -0.05    0.40
   9   0 -13    0.04    0.50
   9   0 -13    0.02    0.39
  -4   3  14  508.16    3.26
  -4   3  14  525.08    3.15
  -2   3  14    7.09    0.51
  -2   3  14    7.35    0.60
  -2   3  14    7.55    0.50
   2  -3 -14    7.84    0.46
   2  -3 -14    7.05    0.91
  10  -2 -11    9.66    0.64
  10  -2 -11   10.06    0.55
  10   2 -11    9.15    0.61
  11  -3  -7  113.17    1.27
  11   3  -7  106.43    1.27
  11   0   3    0.31    0.83
   7   3 -13  261.82    2.13
  -7   3  13  267.42    2.30
   7  -3 -13  264.98    2.54
  11   1 -10  433.64    2.86
  11  -1 -10  445.29    3.08
  11  -1 -10  480.51    2.84
  11   1 -10  493.79    2.90
  -8   3  -7    4.25    0.40
  -8  -3  -7    5.15    0.99
  -1   0  15    0.43    0.39
   1   0 -15    0.26    0.41
   4  -4 -13  119.05    1.97
  -4   4  13  117.06    1.63
  -6   6  -4   87.45    1.27
  -6   6  -4   85.79    1.34
  -6   6  -4   88.33    1.17
   6   6  -8  135.84    1.48
  -6   6   8  137.54    1.52
   6   6  -8  136.75    1.29
  -6   6   8  141.16    2.37
  -6   6   8  138.73    1.81
   6  -6  -8  137.23    1.22
   5  -1 -15  258.36    2.08
   5   1 -15  247.81    1.89
  12  -1  -1  137.37    2.34
 -12  -1   1  138.98    1.78
   5   7  -4  152.42    1.38
  -5   7   4  152.12    2.64
  -5   7   4  148.83    1.50
  12   1  -7   14.46    0.57
 -12  -1   7   14.84    0.70
  12  -1  -7   15.70    0.57
  12  -1  -7   13.56    0.66
  11  -3   0  120.20    1.94
  11   3   0  125.09    2.62
 -11  -3   0  133.66    1.44
 -11  -3   0  129.48    1.91
  10   0 -12    3.60    0.46
  10   0 -12    5.25    0.51
  10   0 -12    4.69    0.50
  -4   7  -3  178.76    1.45
  -4   7  -3  175.70    1.74
   4   7   3  179.30    1.84
   7   6   2    0.62    0.71
  -7   6  -2    0.45    0.57
  -7   6  -2    0.26    0.41
   1   7   6  539.57    3.22
   1   7   6  566.24    4.24
  -1   7  -6  557.04    2.65
  -1   7  -6  541.86    3.10
  -1   6  -9  121.52    1.38
   1   6   9  120.14    1.57
  -1   6  -9  120.81    1.10
  -9   1  -7   61.68    0.97
 -11  -2  -2    5.19    0.73
  11   2   2    4.45    1.16
  11  -2   2    4.35    0.78
 -10   4  -1  490.30    2.81
  10  -4   1  491.29    3.56
  10   4   1  496.38    4.86
 -10   4  -1  503.48    2.99
 -10  -4  -1  492.63    3.74
 -10  -4  -1  509.14    2.86
   8  -4 -11  283.38    1.78
  -8   4  11  288.02    2.36
  -8   4  11  287.83    2.50
  -8  -2  -8   35.42    1.33
  -8  -2  -8   37.00    0.82
  -5   5  -8  398.35    2.56
  -5  -5  -8  401.27    2.40
  -7   5  10   21.97    0.87
  -7   5  10   20.70    0.72
   7   5 -10   20.99    0.73
   7  -5 -10   20.43    0.52
   5   7   1    1.82    0.49
  -5   7  -1    1.56    0.66
  -5   7  -1    1.59    0.40
   5  -7   1    1.70    0.32
  -5   7  -1    1.16    0.29
  -5   6   9    5.18    0.86
   5   6  -9    4.71    0.40
   5   6  -9    5.24    0.35
  -5   6   9    4.76    0.55
   5   6  -9    5.06    0.51
  -5   6   9    3.90    0.36
  -4   5  -9    1.97    0.42
  -4   5  -9    2.44    0.41
   4   5   9    1.63    0.36
   4   5   9    2.77    0.64
  -4  -5  -9    1.80    0.98
   9  -1 -13  115.46    1.45
   9  -1 -13  114.50    1.48
   9   1 -13  120.37    1.48
   9  -1 -13  115.79    1.16
   9   1 -13  121.26    1.26
   9   1 -13  124.53    1.52
 -12  -2   4  729.89    4.04
 -12  -2   4  730.33    3.16
  12  -2  -4  720.49    4.76
  -1   4  13   39.68    0.92
  -1   4  13   40.09    1.00
   1  -4 -13   42.22    1.45
 -10   3  10   35.18    0.81
  10   3 -10   32.73    0.83
  10  -3 -10   33.07    0.87
   6   0  11   -0.15    0.33
 -11  -1  -3    1.65    0.59
  11   1   3    0.95    0.91
  11  -1   3    0.79    0.76
   1   5  11   22.63    0.72
  -1   5 -11   21.70    0.67
  -1   5 -11   19.56    0.54
  -1  -5 -11   22.85    1.22
   8   0 -14  187.05    1.56
   8   0 -14  200.09    1.91
   1   1 -15  445.31    2.69
   1  -1 -15  440.05    2.82
  12   2  -3   22.55    1.30
  12  -2  -3   22.76    1.06
 -12  -2   3   21.96    0.59
 -12  -2   3   25.13    0.86
  -5   3  14    0.46    0.38
  -5   3  14    0.03    0.42
   5   3 -14    0.19    0.34
   2   0  14 1060.37    5.09
  -2   0 -14 1293.31    4.63
 -12  -2   5  352.06    2.67
  12  -2  -5  295.83    2.83
 -12  -2   5  368.80    2.14
 -12   2   5  296.12    2.10
   6   0 -15   -0.04    0.41
   6   0 -15    0.35    0.47
  -1   3  14  348.66    2.66
  -1   3  14  358.30    2.50
   1  -3 -14  353.16    2.28
   1  -3 -14  354.58    3.42
   7   2 -14  791.93    3.70
  -7   2  14  785.01    3.88
  12   0   0  164.36    2.69
 -12   0   0  142.80    1.66
   8   6  -3   53.37    0.82
   8  -6  -3   55.73    0.80
  -8   6   3   54.69    1.48
  -1   2 -14  782.01    3.67
  -1  -2 -14  778.30    3.73
  -9   5  -1  410.38    2.69
   9   5   1  411.44    3.88
  -9  -5  -1  415.37    2.48
  -9   5  -1  420.64    2.99
   7   4 -12  137.40    1.30
   7   4 -12  137.07    1.47
   7  -4 -12  141.48    1.73
  12   0  -8   14.78    0.57
  12   0  -8   10.17    0.63
   8  -6  -2   50.42    0.73
   8   6  -2   50.01    1.15
   8   6  -2   46.93    0.73
  -8   6   2   50.45    1.38
   4   7  -6  281.40    1.90
   4   7  -6  284.94    1.85
  -4   7   6  291.83    3.43
  -4   7   6  287.83    2.12
  -7   6   7  240.40    2.30
   7   6  -7  245.71    2.04
  -7   6   7  245.61    2.05
   7  -6  -7  249.09    1.70
  -7   6   7  243.46    2.90
  10   1 -12    6.11    0.51
  10   1 -12    5.50    0.47
  10  -1 -12    5.94    0.53
  10  -1 -12    5.02    0.45
  10  -1 -12    5.59    0.44
  -9   4  -4   56.32    0.95
  -9   4  -4   53.80    0.98
  -9  -4  -4   55.04    1.47
   9   4   4   54.99    1.50
  -9  -4  -4   59.09    0.99
   8   5  -9  471.57    2.76
  -8   5   9  465.69    3.32
   8  -5  -9  463.10    2.35
   9   5  -7    0.70    0.40
   9  -5  -7    0.20    0.36
  -9   5   7    0.23    0.49
   9   5  -7    0.23    0.48
  -9   5   7    0.22    0.44
  -9  -5   7    0.39    0.27
  -4   6  -7   49.71    0.93
  -4   6  -7   49.91    0.93
   5   0  12   26.96    0.76
  -5   4  13  250.30    2.29
   5  -4 -13  251.71    2.55
  -6   5  -7   70.10    0.94
   6   5   7   66.84    1.19
  -6   5  -7   84.60    1.22
  -6   5  -7   75.76    1.04
  -6  -5  -7   83.51    1.09
 -10  -4   8    0.99    0.34
 -10   4   8    0.46    0.38
  10   4  -8    0.98    0.43
  10   4  -8    0.67    0.40
  10  -4  -8    0.89    0.37
   9  -4 -10  242.91    1.70
  -9   4  10  238.85    2.05
  -2   7   7  555.11    3.20
   2   7  -7  536.08    2.75
   1   7  -7  405.85    2.40
  -1   7   7  407.88    3.71
   6   5 -11   23.88    0.63
  -6   5  11   26.22    0.72
  -6   5  11   26.70    0.88
   6   5 -11   22.63    0.60
   6  -5 -11   24.52    0.71
   2   6 -10   10.40    0.35
   2   6 -10   10.12    0.42
  -2   6  10   11.55    0.58
  -2   6  10   10.67    0.89
   8   6  -4  370.76    2.11
   8  -6  -4  374.59    2.08
  -8   6   4  371.09    2.60
  -3  -2 -13   53.17    0.99
  -3   2 -13   54.97    0.95
   3   2  13   51.87    1.03
  -6   1 -11    6.25    0.38
  -6  -1 -11    5.92    0.42
  12   2  -2    6.54    1.06
 -12  -2   2    7.63    0.63
 -12  -2   2    6.58    0.38
   3   2 -15    3.37    0.38
   3  -2 -15    3.22    0.41
   3  -2 -15    3.04    0.52
   3   6   8    1.52    0.59
  -3   6  -8    1.13    0.41
  -3   6  -8    0.89    0.43
   3   6   8    1.05    0.37
  -3   6  -8    1.12    0.26
  -8  -4  -6    0.52    0.38
  -8  -4  -6    1.07    0.81
  -8   4  -6    0.62    0.35
  -8   4  -6    0.36    0.36
  -5   7   5   47.54    0.82
   5  -7  -5   52.99    0.79
   5   7  -5   48.54    0.80
  -5   7   5   51.68    1.63
 -12   2   6   16.35    0.57
  12  -2  -6   16.31    0.49
 -12  -2   6   18.74    0.52
 -12  -2   6   19.38    0.71
  -2   4 -12 1552.06    5.29
  -2  -4 -12 1549.56    8.22
  -2  -4 -12 1537.25    5.09
  -8   6   1   28.39    1.04
   8   6  -1   25.71    0.91
   8   1 -14  398.10    2.60
   8   1 -14  337.50    2.43
   8  -1 -14  360.01    2.54
  -8   1  14  332.46    2.19
   8  -1 -14  385.73    2.52
  -3  -5 -10   11.12    1.07
   3   5  10   10.64    0.55
  -3   5 -10   10.90    0.56
  -3   5 -10   11.01    0.50
  -3   6  10   10.45    0.86
  -3   6  10   10.45    0.59
   3   6 -10    9.90    0.34
  -3   6  10   10.87    0.54
  11  -3  -8   39.41    0.78
  11   3  -8   42.32    0.82
  -5   6  -6   97.31    1.21
  -5   6  -6   96.05    1.20
  -5   6  -6   98.11    1.21
   3  -5 -12    3.50    0.65
  -3   5  12    2.55    0.36
   2   1  14   54.73    1.05
  -2  -1 -14   51.15    0.94
  -2   1 -14   53.08    0.90
   4  -2 -15    2.14    0.36
   4   2 -15    2.11    0.38
   4  -2 -15    2.37    0.50
   6  -1 -15    1.11    0.34
   6   1 -15    0.93    0.38
  -6   1  15    1.05    0.38
   6   1 -15    0.99    0.41
   6  -1 -15    0.96    0.34
  12   1   0   52.18    1.75
  12  -1   0   49.44    1.49
 -12  -1   0   51.54    1.13
  -2   5  12  147.57    1.58
  -2   5  12  148.95    1.93
   2   3  13  236.33    2.24
  -2  -3 -13  262.62    2.01
  -2  -3 -13  267.76    3.02
  -2   3 -13  243.23    1.91
  -1   6  10   53.51    1.06
  -1   6  10   50.53    0.91
  -1   6  10   54.22    1.40
   0   0  15    0.00    0.37
   0   0 -15   -0.04    0.37
  -7   1 -10   31.15    0.67
  -7  -1 -10   29.17    0.63
  12   1  -8    4.56    0.41
  12  -1  -8    4.62    0.41
  12  -1  -8    4.05    0.47
 -12  -1   8    4.38    0.49
  -8  -5  -4  103.28    1.84
  -8  -5  -4   99.32    1.17
   8   5   4  105.86    1.68
  -8   5  -4  101.33    1.30
  -3   7  -5  139.32    1.35
  -3   7  -5  137.86    1.22
  -3   7  -5  141.51    1.50
   5   1  12   31.49    0.72
  -5  -1 -12   29.14    0.70
   3   7  -7   54.65    0.83
  -3   7   7   60.00    1.63
   5   7   2  211.68    1.95
  -5   7  -2  213.39    1.71
  -2   2  15   22.33    0.65
   2  -2 -15   23.48    0.66
   0   7   7  534.81    4.03
   0   7  -7  464.15    2.43
 -10  -2  -5  198.60    2.34
 -10   2  -5  200.43    1.57
  11   3   1  151.45    2.66
 -11  -3  -1  154.41    2.00
 -11  -3  -1  159.58    1.45
   8   6  -5   35.75    0.68
   8   6  -5   34.67    0.78
  -8   6   5   37.16    0.84
  -8   6   5   36.47    1.15
   8  -6  -5   37.84    0.68
  11   0 -11    0.03    0.37
  -8   0  -9    0.06    0.30
   0   4  13  131.52    1.50
   0  -4 -13  126.41    2.14
   0   4 -13  107.67    1.14
   0   4  13  113.27    1.55
  -2   7  -6  318.07    1.86
  -2   7  -6  320.93    2.21
  -2   7  -6  321.98    2.06
   4  -5 -12  184.06    2.00
  -4   5  12  181.43    1.93
  -6   3 -10    9.03    0.46
  -6  -3 -10    9.39    0.96
  -6  -3 -10   10.14    0.50
  11   2 -10  333.03    2.22
  11  -2 -10  314.05    2.04
  -1   5  12  205.67    2.26
  -1   5  12  207.09    1.86
   4   0  13    0.23    0.38
  -4   7  -4  635.92    2.77
   4   7   4  628.26    3.07
  -7   6  -3    4.23    0.48
  -7   6  -3    4.63    0.42
  -4   6  10  301.73    2.98
  -4   6  10  293.58    2.32
  -8   6   0   80.08    1.42
   6   7  -2  251.60    1.81
   6  -7  -2  286.96    1.71
  -5  -3 -11   59.14    0.97
  -5   3 -11   60.96    0.95
  -6   3  14    5.88    0.47
   6   3 -14    6.17    0.42
   5  -2 -15  174.74    1.75
  -5   2  15  170.86    1.66
 -10  -3  -4   55.54    1.36
  10   3   4   56.19    1.43
 -10   3  -4   58.18    0.86
 -10  -4  -2  229.55    1.75
 -10   4  -2  207.97    1.66
 -10   4  -2  202.59    1.55
 -10  -4  -2  213.44    2.40
  10   4   2  220.34    2.81
 -12  -2   1   39.34    1.02
  12  -2  -1   40.10    1.26
  -9   3  -6   12.50    0.51
  -9  -3  -6   13.12    0.90
   0   3  14  899.48    4.00
   0  -3 -14  889.66    3.61
   0   1  15    4.98    0.46
   0  -1 -15    5.20    0.46
   0   1 -15    6.13    0.38
 -12  -2   7   14.11    0.58
  12  -2  -7   14.37    0.49
   2   6   9   94.22    1.62
  -2   6  -9   93.41    1.13
 -10   0  -6  375.48    1.95
   6   7  -1  122.54    1.32
   6  -7  -1  121.80    1.07
  -6   7   1  122.29    1.93
  -7  -5  -6  218.09    2.67
  -7  -5  -6  217.11    1.64
  -5  -4 -10    0.24    0.85
  -5   4 -10    0.40    0.34
  -5   4 -10    0.40    0.36
   6  -7  -3 1273.55    4.09
  -6   7   3 1288.12    6.64
  -9  -2  -7    1.17    0.62
  -9  -2  -7    1.96    0.31
   9  -3 -12  135.13    1.51
  -9   3  12  138.45    1.42
   9   3 -12  133.15    1.42
  -6  -4  -9  298.30    2.01
  -6   4  -9  304.76    2.10
  12   0   1    0.14    0.79
   0   6 -10   86.19    1.00
   0   6  10   86.33    1.64
  -6   6  -5   89.85    1.01
   6   6   5   87.39    1.11
  11  -4  -4   54.92    1.11
 -11  -4   4   73.35    0.96
  -7   3  -9   52.53    0.80
  -7   3  -9   50.95    0.74
  -7  -3  -9   50.72    1.46
  11   1 -11    2.64    0.40
  -9  -5  -2   16.20    0.51
  -9   5  -2   16.66    0.56
   9   5   2   16.40    0.91
  -8   1  -9    1.21    0.30
   9   2 -13  101.93    1.24
   9   2 -13   95.59    1.27
  -9   2  13   87.06    1.03
   9  -2 -13   77.65    1.03
   6  -4 -13   28.37    0.82
  -6   4  13   27.78    0.76
  -6   4  13   28.34    0.70
   6   6  -9   36.23    0.78
  -6   6   9   39.71    0.93
  12   0  -9    0.04    0.32
  11  -4  -3   30.71    0.93
  11   4  -3   28.09    1.01
   7   0 -15    0.17    0.41
   7   0 -15    0.23    0.33
  11   2   3   41.38    1.38
 -11  -2  -3   42.06    1.07
  -9   5   8    0.94    0.39
   9   5  -8    0.68    0.37
  -9   5   8    0.92    0.38
   9   5  -8    0.72    0.36
   0   8   0    1.43    0.33
   0  -8   0    1.79    0.32
  -8   3  13   51.21    0.91
   8   3 -13   49.39    0.87
   8   3 -13   49.06    0.91
  -1   2  15  236.29    1.74
  -1   2  15  240.36    1.89
   5   7  -6  593.75    2.53
   5  -7  -6  596.82    2.39
   4   1  13    2.61    0.38
  -4  -1 -13    2.16    0.33
  -4   7   7  138.31    1.28
   4   7  -7  129.07    1.10
  -2  -5 -11  481.80    3.94
  -2   5 -11  471.11    2.54
   0  -8  -1    5.09    0.33
   0   8  -1    4.62    0.37
  -1   7  -7  607.77    2.89
   1   7   7  662.13    4.09
  -1   7  -7  687.48    3.00
  -1   7  -7  665.21    2.58
   1   7   7  582.20    2.99
 -11  -4   5    6.63    0.39
   6   7   0  181.43    1.68
  -6   7   0  183.84    2.09
   7  -6  -8  107.04    0.97
  -7   6   8  104.67    1.18
   7   6  -8  111.36    1.01
   7   6  -8  113.75    1.29
  -7   6   8  112.45    1.42
   6  -7  -4  337.96    1.83
  -6   7   4  331.80    3.24
   4   4  11    1.82    0.51
  -4  -4 -11    2.73    0.35
  -4   4 -11    1.51    0.39
  -4   4 -11    2.48    0.36
   8   6  -6   14.98    0.57
  -8   6   6   15.64    0.55
   8  -6  -6   17.20    0.48
   8   6  -6   16.64    0.48
   8   6  -6   16.06    0.55
  -1  -8   0    9.36    0.40
  -1   8   0    8.49    0.47
  10   2 -12  361.28    2.06
  10  -2 -12  341.91    1.91
  10   2 -12  292.09    2.00
  10  -2 -12  314.80    2.27
 -10   1  -6  750.70    2.93
 -10  -4   9  415.08    2.19
  10   4  -9  428.81    2.34
  -4  -3 -12  185.26    1.59
   4   3  12  168.72    1.47
  -4   3 -12  184.41    1.55
  -4  -3 -12  174.02    2.34
 -10   5   3    1.14    0.32
 -10  -5   3    0.76    0.27
 -11  -4   2   56.83    0.84
  11   4  -2   50.10    1.30
   1   8  -1  123.83    1.13
  -1   8   1  120.78    1.31
  -1  -8   1  122.99    1.14
  -5   5  12   61.78    1.09
   5  -5 -12   58.30    0.98
 -10   5   4  220.47    1.75
 -10  -5   4  190.90    1.43
 -12  -1  -1   77.34    1.23
  12  -1   1   79.93    1.65
  11   3  -9  163.99    1.40
 -11  -3   9  170.53    1.37
  -7   4  -8   74.79    0.98
  -7  -4  -8   74.92    0.99
  -5   7  -3   32.27    0.66
   5   7   3   32.66    0.71
  12   1  -9  108.62    1.13
  12  -1  -9  112.49    1.14
  12  -1  -9   95.60    1.23
 -12  -1   9   89.26    1.15
  -1   8  -1   55.60    0.86
   1  -8   1   56.83    0.77
  10  -3 -11  220.48    1.78
  10   3 -11  219.16    1.68
   0   5  12  147.44    1.46
   0   5  12  151.59    1.81
   0  -5 -12  153.62    2.05
   0   5  12  147.42    1.50
  -6  -2 -11   29.15    0.64
  -8   6  -1   22.35    0.76
   8   6   1   23.37    0.82
 -10   5   2  138.47    1.35
 -10  -5   2  135.12    1.20
   7   1 -15    7.45    0.43
  -7   1  15    8.73    0.42
  -8   2  14    2.88    0.34
   8  -2 -14    3.04    0.41
   8  -2 -14    2.75    0.43
   0   8  -2    0.93    0.27
   0  -8   2    0.70    0.30
   0   8   2    0.61    0.29
   2   2  14  318.99    2.17
  -2  -2 -14  298.55    1.98
   1  -8  -2  102.20    0.92
   1   8  -2  106.02    1.05
  -6   2  15  158.75    1.49
   6   2 -15  155.55    1.41
  -5   6  10    9.93    0.51
  12  -2   0    0.37    0.62
  12   2   0   -0.25    0.78
  -7   5  11  100.74    1.33
  -7   5  11   99.57    1.14
  -8   5  10  149.03    1.61
   8   5 -10  145.07    1.35
  10  -5  -5   13.17    0.39
 -10   5   5   14.91    0.53
 -11  -4   6   20.68    0.54
  -7  -2 -10   65.48    0.87
  -7   2 -10   62.01    0.75
  12  -2  -8  485.18    2.31
  -2   7   8  324.79    2.11
  -2   7   8  353.75    3.14
  -5  -2 -12  138.52    1.30
   1   0  15    0.01    0.33
  -8   4  12  206.20    1.67
   8  -4 -12  198.72    1.60
  11   3   2  274.78    2.99
 -11  -3  -2  283.92    2.51
  -9   4  -5    2.92    0.38
  -9  -4  -5    3.69    0.77
  -9  -4  -5    4.18    0.42
  -2  -8   1   11.58    0.40
  -2   8   1   13.05    0.53
   1   4  13  131.16    1.42
   1   4  13  144.61    1.43
  -8   3  -8    6.31    0.34
  -8  -3  -8    6.77    0.75
  -8  -3  -8    5.92    0.40
  -6   7  -1   29.97    0.77
   6   7   1   28.80    0.70
   9   0 -14  129.96    1.29
  11   4  -1   10.83    0.80
  11  -4  -1    9.62    0.68
 -11  -4   1   11.11    0.46
  -1   7   8   37.12    0.79
   1   7  -8   37.63    0.56
   2  -8   0    3.79    0.33
  -6   7   5  140.04    2.09
   6   7  -5  138.33    1.07
   9   4 -11  564.08    2.54
   9   4 -11  498.65    2.58
 -12  -3   4    4.48    0.32
   1  -8   2   37.45    0.62
 -10  -5   1   74.03    0.88
 -10   5   1   76.68    0.97
  10   5  -1   75.22    1.32
   1   6  10   65.17    1.35
   1   6  10   55.61    0.90
   2  -8  -2   15.32    0.42
  -2   8   2   14.68    0.57
   2   8  -2   13.90    0.47
  -3   7  -6   10.09    0.45
  -3   7  -6    9.92    0.50
 -12  -3   3  241.84    1.51
  12  -3  -3  223.12    2.15
 -12  -3   5   14.19    0.43
  -3   7   8    4.56    0.91
   3   7  -8    4.23    0.27
   7  -3 -14    0.36    0.42
  -7   3  14    0.36    0.39
  -1   3 -14  153.57    1.29
   1   3  14  158.44    1.47
  -5  -5  -9   26.32    1.20
  -5   5  -9   23.25    0.59
   3   4  12  284.55    2.36
  -3   4 -12  303.51    1.82
   2  -8   1   61.12    0.75
  -9   1  -8  205.84    1.39
   1   8  -3   58.47    0.80
  -1  -8   3   52.68    0.75
  -7   6  -4   56.89    0.84
  -4   7  -5    0.59    0.38
  -4   6  -8  306.55    1.92
  -8   5  -5   25.85    0.63
  -8   5  -5   25.64    0.57
   3  -4 -14  775.48    3.98
 -10  -4  -3  160.64    1.33
 -10  -4  -3  157.23    1.93
 -10   5   6  175.78    1.47
  -1  -1 -15  985.23    3.68
   1   1  15  970.64    3.75
   8   6  -7   36.72    0.76
   8   6  -7   28.92    0.71
   9   1 -14  117.88    1.22
   0   7  -8   37.72    0.68
   2   0 -16   45.06    0.79
  -5   7   7   76.97    1.65
  -3  -3 -13   74.28    0.97
  -3   3 -13   84.15    1.00
  11  -2 -11  122.09    1.11
  -6   5  -8    0.87    0.38
   3  -1  14   72.30    1.14
  -4   5 -10    7.47    0.53
  -2   7  -7   26.88    0.66
   4  -4 -14    6.60    0.74
  -2   4  14   47.89    0.92
 -11  -4   7  268.43    1.62
  12   0 -10   31.93    0.71
  -6   5  12  101.80    1.29
  -8  -4  -7   48.75    0.81
  -8  -4  -7   49.06    1.50
  -9   5   9    0.53    0.43
   9   5  -9    0.35    0.44
   9   5  -9    0.39    0.46
  -2   8   3    4.52    0.52
   2   8  -3    4.46    0.44
   0   0   0    0.00    0.00

_computing_structure_solution     'SHELXT 2018/2 (Sheldrick, 2018)'
;

_shelx_hkl_checksum   88096

#==============================================================================
#     End of CIF
#==============================================================================
