# Supplementary material for: Solid State Structure and Hydrogen Bonding of Some Cyclic NH Carboximides
Source: MDPI journal article supplement (doi:10.3390/cryst13010150), 2023-01-15
Supplement: s1 [file s1 › 5.cif]

data_5
_audit_creation_date                               2020-08-24
_audit_creation_method                            'by CrystalStructure 4.3'

_publ_section_references
;
    ENTER OTHER REFERENCES

    Rigaku (2018). CrystalStructure. Version 4.3. 
    Rigaku Corporation, Tokyo, Japan.

    Sheldrick, G. M. (2014). Acta Cryst. (2014). A70, C1437.
    SHELXT Version 2018/2

    Sheldrick, G.M. (2008) SHELXL Version 2018/3, Acta Cryst. A64, 112-122.

    Rigaku Oxford Diffraction (2015), CrysAlisPro. version 1.171.39.8d.
    Rigaku Corporation, Tokyo, Japan

;


_chemical_formula_sum                             'C11 H13 N O2'
_chemical_formula_moiety                          'C11 H13 N O2'
_chemical_formula_weight                           191.23
_chemical_melting_point                            ?

#==============================================================================
# CRYSTAL DATA
_space_group_crystal_system                        monoclinic
_space_group_name_H-M_alt                         'P 1 21/c 1'
_space_group_name_Hall                            '-P 2ybc'
_space_group_IT_number                             14
loop_
_space_group_symop_id
_space_group_symop_operation_xyz
1   '+X,+Y,+Z'
2   '-X,1/2+Y,1/2-Z'
3   '-X,-Y,-Z'
4   '+X,-1/2-Y,-1/2+Z'
#------------------------------------------------------------------------------
_cell_length_a                                     11.3039(4)
_cell_length_b                                     7.28194(18)
_cell_length_c                                     12.3790(4)
_cell_angle_alpha                                  90.0000
_cell_angle_beta                                   113.542(4)
_cell_angle_gamma                                  90.0000
_cell_volume                                       934.16(6)
_cell_formula_units_Z                              4
_cell_measurement_reflns_used                      7956
_cell_measurement_theta_min                        4.44
_cell_measurement_theta_max                        74.92
_cell_measurement_temperature                      125
#------------------------------------------------------------------------------
_exptl_crystal_description                         plate
_exptl_crystal_colour                              colourless
_exptl_crystal_size_max                            0.120
_exptl_crystal_size_mid                            0.040
_exptl_crystal_size_min                            0.010
_exptl_crystal_density_diffrn                      1.360
_exptl_crystal_density_meas                        ?
_exptl_crystal_density_method                     'not measured'
_exptl_crystal_F_000                               408.00
_exptl_absorpt_coefficient_mu                      0.763
_exptl_absorpt_correction_type                     multi-scan
_exptl_absorpt_process_details
;
CrysAlisPro 1.171.39.8d (Rigaku Oxford Diffraction, 2015)
Empirical absorption correction using spherical harmonics,
 implemented in SCALE3 ABSPACK scaling algorithm.
;
_exptl_absorpt_correction_T_min                    0.823
_exptl_absorpt_correction_T_max                    0.992

#==============================================================================
# EXPERIMENTAL DATA

_diffrn_ambient_temperature                        125
_diffrn_radiation_type                            'Cu K\a'
_diffrn_radiation_wavelength                       1.54184
_diffrn_measurement_device_type                   'Rigaku XtaLAB P200'
_diffrn_measurement_method                         \w
_diffrn_detector_area_resol_mean                   5.811
_diffrn_reflns_number                              10206
_diffrn_reflns_av_unetI/netI                       0.0081
_diffrn_reflns_av_R_equivalents                    0.0172
_diffrn_reflns_theta_max                           75.347
_diffrn_reflns_theta_min                           4.266
_diffrn_reflns_theta_full                          67.684
_diffrn_measured_fraction_theta_max                0.980
_diffrn_measured_fraction_theta_full               0.991
_diffrn_reflns_Laue_measured_fraction_max          0.980
_diffrn_reflns_Laue_measured_fraction_full         0.991
_diffrn_reflns_point_group_measured_fraction_max   0.980
_diffrn_reflns_point_group_measured_fraction_full  0.991
_diffrn_reflns_limit_h_min                        -13
_diffrn_reflns_limit_h_max                         14
_diffrn_reflns_limit_k_min                        -8
_diffrn_reflns_limit_k_max                         9
_diffrn_reflns_limit_l_min                        -15
_diffrn_reflns_limit_l_max                         15
_diffrn_standards_number                           0
_diffrn_standards_interval_count                   .
_diffrn_standards_decay_%                          ?
_reflns_number_total                               1886
_reflns_number_gt                                  1845
_reflns_threshold_expression                       F^2^>2.0\s(F^2^)
_reflns_Friedel_coverage          0.000
_reflns_Friedel_fraction_max      .
_reflns_Friedel_fraction_full     .

#==============================================================================
# REFINEMENT DATA

_refine_special_details
;
    Refinement was performed using all reflections. The weighted 
    R-factor (wR) and goodness of fit (S) are based on F^2^.
    R-factor (gt) are based on F. The threshold expression of
    F^2^ > 2.0 sigma(F^2^) is used only for calculating R-factor (gt).
;
_refine_ls_structure_factor_coef                   Fsqd
_refine_ls_R_factor_all                            0.0364
_refine_ls_R_factor_gt                             0.0360
_refine_ls_wR_factor_ref                           0.0970
_refine_ls_wR_factor_gt                            0.0967
_refine_ls_number_restraints                       1
_refine_ls_hydrogen_treatment                      mixed
_refine_ls_number_reflns                           1886
_refine_ls_number_parameters                       131
_refine_ls_goodness_of_fit_ref                     1.041
_refine_ls_weighting_scheme                        calc
_refine_ls_weighting_details
           'w = 1/[\s^2^(Fo^2^)+(0.0543P)^2^+0.3510P] where P=(Fo^2^+2Fc^2^)/3'
_atom_sites_solution_hydrogens                     geom
_atom_sites_solution_primary                       direct
_atom_sites_solution_secondary                     difmap
_refine_ls_shift/su_max                            0.000
_refine_diff_density_max                           0.25
_refine_diff_density_min                          -0.19
_refine_ls_extinction_method                       none
_refine_ls_extinction_coef                         ?

loop_
_atom_type_symbol
_atom_type_description
_atom_type_scat_dispersion_real
_atom_type_scat_dispersion_imag
_atom_type_scat_source
  'C' 'C'  0.0181 0.0091 
;
International Tables for Crystallography
(Vol. C, Tables 4.2.6.8 and 6.1.1.4)
;
  'H' 'H'  0.0000 0.0000 
;
International Tables for Crystallography
(Vol. C, Table 6.1.1.4)
;
  'N' 'N'  0.0311 0.0180 
;
International Tables for Crystallography
(Vol. C, Tables 4.2.6.8 and 6.1.1.4)
;
  'O' 'O'  0.0492 0.0322 
;
International Tables for Crystallography
(Vol. C, Tables 4.2.6.8 and 6.1.1.4)
;

#==============================================================================
# ATOMIC COORDINATES AND THERMAL PARAMETERS

loop_
 _atom_site_label
 _atom_site_type_symbol
 _atom_site_fract_x
 _atom_site_fract_y
 _atom_site_fract_z
 _atom_site_U_iso_or_equiv
 _atom_site_adp_type
 _atom_site_occupancy
 _atom_site_site_symmetry_order  
 _atom_site_calc_flag
 _atom_site_refinement_flags_posn
 _atom_site_refinement_flags_adp
 _atom_site_refinement_flags_occupancy
 _atom_site_disorder_assembly
 _atom_site_disorder_group
O2 O 0.13891(8) 0.65565(11) 0.57236(8) 0.0311(2) Uani 1 1 d . . . . .
O9 O 0.52410(7) 0.36098(10) 0.73223(7) 0.0241(2) Uani 1 1 d . . . . .
N1 N 0.34303(8) 0.53865(13) 0.66634(8) 0.0203(2) Uani 1 1 d D . . . .
C2 C 0.21367(10) 0.52909(15) 0.59050(9) 0.0207(2) Uani 1 1 d . . . . .
C3 C 0.18665(10) 0.33862(14) 0.53670(9) 0.0191(2) Uani 1 1 d . . . . .
H3 H 0.118063 0.278062 0.555953 0.023 Uiso 1 1 calc R U . . .
C4 C 0.14202(11) 0.35193(16) 0.40080(10) 0.0238(3) Uani 1 1 d . . . . .
H4 H 0.076610 0.452316 0.370578 0.029 Uiso 1 1 calc R U . . .
C5 C 0.25714(12) 0.39982(17) 0.37366(10) 0.0276(3) Uani 1 1 d . . . . .
H5 H 0.252827 0.497740 0.321505 0.033 Uiso 1 1 calc R U . . .
C6 C 0.36446(11) 0.30244(17) 0.42408(10) 0.0262(3) Uani 1 1 d . . . . .
H6 H 0.437678 0.326594 0.406841 0.031 Uiso 1 1 calc R U . . .
C7 C 0.36782(10) 0.15224(15) 0.50953(9) 0.0217(2) Uani 1 1 d . . . . .
H7 H 0.459621 0.114654 0.554470 0.026 Uiso 1 1 calc R U . . .
C8 C 0.31549(9) 0.23428(14) 0.59717(9) 0.0179(2) Uani 1 1 d . . . . .
H8 H 0.305048 0.134541 0.648197 0.021 Uiso 1 1 calc R U . . .
C9 C 0.40818(10) 0.37847(14) 0.67330(9) 0.0184(2) Uani 1 1 d . . . . .
C10 C 0.07992(11) 0.16969(17) 0.34114(10) 0.0281(3) Uani 1 1 d . . . . .
H10A H -0.012158 0.170158 0.328871 0.034 Uiso 1 1 calc R U . . .
H10B H 0.083482 0.163508 0.262606 0.034 Uiso 1 1 calc R U . . .
C11 C 0.14352(11) -0.00230(17) 0.41039(11) 0.0278(3) Uani 1 1 d . . . . .
H11A H 0.101917 -0.110943 0.362070 0.033 Uiso 1 1 calc R U . . .
H11B H 0.125569 -0.006824 0.482354 0.033 Uiso 1 1 calc R U . . .
C12 C 0.28949(11) -0.01873(16) 0.44727(10) 0.0264(3) Uani 1 1 d . . . . .
H12A H 0.306465 -0.044089 0.376183 0.032 Uiso 1 1 calc R U . . .
H12B H 0.321016 -0.125469 0.500678 0.032 Uiso 1 1 calc R U . . .
H1 H 0.3850(14) 0.6509(13) 0.7058(13) 0.038(4) Uiso 1 1 d D . . . .

loop_
 _atom_site_aniso_label
 _atom_site_aniso_U_11
 _atom_site_aniso_U_22
 _atom_site_aniso_U_33
 _atom_site_aniso_U_23
 _atom_site_aniso_U_13
 _atom_site_aniso_U_12
O2 0.0224(4) 0.0242(4) 0.0446(5) -0.0029(3) 0.0112(4) 0.0049(3)
O9 0.0188(4) 0.0225(4) 0.0244(4) 0.0020(3) 0.0017(3) 0.0008(3)
N1 0.0188(5) 0.0196(5) 0.0210(4) -0.0009(3) 0.0062(4) 0.0000(3)
C2 0.0180(5) 0.0224(5) 0.0225(5) 0.0002(4) 0.0090(4) 0.0000(4)
C3 0.0165(5) 0.0211(5) 0.0199(5) 0.0002(4) 0.0073(4) 0.0001(4)
C4 0.0223(5) 0.0259(6) 0.0185(5) 0.0018(4) 0.0034(4) 0.0035(4)
C5 0.0356(6) 0.0291(6) 0.0190(5) 0.0026(4) 0.0120(5) -0.0021(5)
C6 0.0277(6) 0.0330(6) 0.0226(5) -0.0032(5) 0.0148(5) -0.0046(5)
C7 0.0185(5) 0.0254(6) 0.0214(5) -0.0023(4) 0.0081(4) 0.0028(4)
C8 0.0177(5) 0.0191(5) 0.0165(5) 0.0012(4) 0.0064(4) 0.0007(4)
C9 0.0201(5) 0.0193(5) 0.0156(5) 0.0028(4) 0.0070(4) 0.0006(4)
C10 0.0226(6) 0.0334(6) 0.0230(6) -0.0046(5) 0.0035(4) -0.0005(5)
C11 0.0267(6) 0.0269(6) 0.0267(6) -0.0067(4) 0.0074(5) -0.0042(4)
C12 0.0277(6) 0.0256(6) 0.0239(5) -0.0045(4) 0.0082(5) 0.0019(4)

#==============================================================================
_computing_data_collection
                                    'CrysAlisPro 1.171.39.8d (Rigaku OD, 2015)'
_computing_cell_refinement
                                    'CrysAlisPro 1.171.39.8d (Rigaku OD, 2015)'
_computing_data_reduction
                                    'CrysAlisPro 1.171.39.8d (Rigaku OD, 2015)'
_computing_structure_solution
                                      'SHELXT Version 2018/2 (Sheldrick, 2014)'
_computing_structure_refinement
                                      'SHELXL Version 2018/3 (Sheldrick, 2008)'
_computing_publication_material
                                          'CrystalStructure 4.3 (Rigaku, 2018)'
_computing_molecular_graphics                     'CrystalStructure 4.3'

#==============================================================================
# MOLECULAR GEOMETRY

_geom_special_details
;
 All esds (except the esd in the dihedral angle between two l.s. planes)
 are estimated using the full covariance matrix.  The cell esds are taken
 into account individually in the estimation of esds in distances, angles
 and torsion angles; correlations between esds in cell parameters are only
 used when they are defined by crystal symmetry.  An approximate (isotropic)
 treatment of cell esds is used for estimating esds involving l.s. planes.
;

loop_
 _geom_bond_atom_site_label_1
 _geom_bond_atom_site_label_2
 _geom_bond_distance
 _geom_bond_site_symmetry_2
 _geom_bond_publ_flag
O2 C2 1.2093(14) . ?
O9 C9 1.2255(13) . ?
N1 C9 1.3637(14) . ?
N1 C2 1.3884(14) . ?
N1 H1 0.973(5) . ?
C2 C3 1.5159(15) . ?
C3 C8 1.5453(14) . ?
C3 C4 1.5544(14) . ?
C3 H3 1.0000 . ?
C4 C5 1.5090(17) . ?
C4 C10 1.5444(16) . ?
C4 H4 1.0000 . ?
C5 C6 1.3264(18) . ?
C5 H5 0.9500 . ?
C6 C7 1.5115(16) . ?
C6 H6 0.9500 . ?
C7 C12 1.5437(15) . ?
C7 C8 1.5481(14) . ?
C7 H7 1.0000 . ?
C8 C9 1.5164(14) . ?
C8 H8 1.0000 . ?
C10 C11 1.5258(17) . ?
C10 H10A 0.9900 . ?
C10 H10B 0.9900 . ?
C11 C12 1.5309(16) . ?
C11 H11A 0.9900 . ?
C11 H11B 0.9900 . ?
C12 H12A 0.9900 . ?
C12 H12B 0.9900 . ?

loop_
 _geom_angle_atom_site_label_1
 _geom_angle_atom_site_label_2
 _geom_angle_atom_site_label_3
 _geom_angle
 _geom_angle_site_symmetry_1
 _geom_angle_site_symmetry_3
 _geom_angle_publ_flag
C9 N1 C2 113.34(9) . . ?
C9 N1 H1 123.0(10) . . ?
C2 N1 H1 123.5(10) . . ?
O2 C2 N1 123.81(10) . . ?
O2 C2 C3 127.76(10) . . ?
N1 C2 C3 108.42(9) . . ?
C2 C3 C8 104.56(8) . . ?
C2 C3 C4 109.86(9) . . ?
C8 C3 C4 113.00(8) . . ?
C2 C3 H3 109.8 . . ?
C8 C3 H3 109.8 . . ?
C4 C3 H3 109.8 . . ?
C5 C4 C10 111.09(10) . . ?
C5 C4 C3 108.63(9) . . ?
C10 C4 C3 110.67(9) . . ?
C5 C4 H4 108.8 . . ?
C10 C4 H4 108.8 . . ?
C3 C4 H4 108.8 . . ?
C6 C5 C4 118.67(10) . . ?
C6 C5 H5 120.7 . . ?
C4 C5 H5 120.7 . . ?
C5 C6 C7 118.60(10) . . ?
C5 C6 H6 120.7 . . ?
C7 C6 H6 120.7 . . ?
C6 C7 C12 112.65(9) . . ?
C6 C7 C8 107.54(9) . . ?
C12 C7 C8 110.95(9) . . ?
C6 C7 H7 108.5 . . ?
C12 C7 H7 108.5 . . ?
C8 C7 H7 108.5 . . ?
C9 C8 C3 104.13(8) . . ?
C9 C8 C7 109.89(8) . . ?
C3 C8 C7 113.59(8) . . ?
C9 C8 H8 109.7 . . ?
C3 C8 H8 109.7 . . ?
C7 C8 H8 109.7 . . ?
O9 C9 N1 123.27(10) . . ?
O9 C9 C8 127.38(10) . . ?
N1 C9 C8 109.35(9) . . ?
C11 C10 C4 114.49(9) . . ?
C11 C10 H10A 108.6 . . ?
C4 C10 H10A 108.6 . . ?
C11 C10 H10B 108.6 . . ?
C4 C10 H10B 108.6 . . ?
H10A C10 H10B 107.6 . . ?
C10 C11 C12 116.20(10) . . ?
C10 C11 H11A 108.2 . . ?
C12 C11 H11A 108.2 . . ?
C10 C11 H11B 108.2 . . ?
C12 C11 H11B 108.2 . . ?
H11A C11 H11B 107.4 . . ?
C11 C12 C7 114.89(9) . . ?
C11 C12 H12A 108.5 . . ?
C7 C12 H12A 108.5 . . ?
C11 C12 H12B 108.5 . . ?
C7 C12 H12B 108.5 . . ?
H12A C12 H12B 107.5 . . ?

loop_
 _geom_torsion_atom_site_label_1
 _geom_torsion_atom_site_label_2
 _geom_torsion_atom_site_label_3
 _geom_torsion_atom_site_label_4
 _geom_torsion
 _geom_torsion_site_symmetry_1
 _geom_torsion_site_symmetry_2
 _geom_torsion_site_symmetry_3
 _geom_torsion_site_symmetry_4
 _geom_torsion_publ_flag
C9 N1 C2 O2 179.55(10) . . . . ?
C9 N1 C2 C3 -1.04(12) . . . . ?
O2 C2 C3 C8 -177.18(11) . . . . ?
N1 C2 C3 C8 3.44(11) . . . . ?
O2 C2 C3 C4 61.29(14) . . . . ?
N1 C2 C3 C4 -118.10(9) . . . . ?
C2 C3 C4 C5 72.87(11) . . . . ?
C8 C3 C4 C5 -43.47(12) . . . . ?
C2 C3 C4 C10 -164.92(9) . . . . ?
C8 C3 C4 C10 78.73(11) . . . . ?
C10 C4 C5 C6 -72.12(13) . . . . ?
C3 C4 C5 C6 49.83(14) . . . . ?
C4 C5 C6 C7 -2.03(16) . . . . ?
C5 C6 C7 C12 74.05(13) . . . . ?
C5 C6 C7 C8 -48.51(13) . . . . ?
C2 C3 C8 C9 -4.32(10) . . . . ?
C4 C3 C8 C9 115.13(9) . . . . ?
C2 C3 C8 C7 -123.84(9) . . . . ?
C4 C3 C8 C7 -4.40(13) . . . . ?
C6 C7 C8 C9 -66.98(11) . . . . ?
C12 C7 C8 C9 169.41(8) . . . . ?
C6 C7 C8 C3 49.21(12) . . . . ?
C12 C7 C8 C3 -74.40(11) . . . . ?
C2 N1 C9 O9 177.36(9) . . . . ?
C2 N1 C9 C8 -1.94(12) . . . . ?
C3 C8 C9 O9 -175.31(10) . . . . ?
C7 C8 C9 O9 -53.30(14) . . . . ?
C3 C8 C9 N1 3.95(11) . . . . ?
C7 C8 C9 N1 125.96(9) . . . . ?
C5 C4 C10 C11 83.98(12) . . . . ?
C3 C4 C10 C11 -36.78(13) . . . . ?
C4 C10 C11 C12 -53.27(14) . . . . ?
C10 C11 C12 C7 50.32(14) . . . . ?
C6 C7 C12 C11 -79.67(12) . . . . ?
C8 C7 C12 C11 40.96(13) . . . . ?

loop_
_geom_hbond_atom_site_label_D
_geom_hbond_atom_site_label_H
_geom_hbond_atom_site_label_A
_geom_hbond_site_symmetry_D
_geom_hbond_site_symmetry_H
_geom_hbond_site_symmetry_A
_geom_hbond_distance_DA
_geom_hbond_distance_DH
_geom_hbond_distance_HA
_geom_hbond_angle_DHA
_geom_hbond_publ_flag
N1 H1 O9 . . 2_656 2.7991(11) 0.973(11) 1.832(11) 172.4(17) no

#==============================================================================
# Additional structures and associated data_? identifiers
# should be added at this point if there is more than one 
# structure analysis in the CIF.

_shelx_res_file
;
TITL DSAA14
    shelxl.res
    created by SHELXL-2018/3 at 21:34:10 on 24-Aug-2020
CELL  1.54184 11.30390 7.28194 12.37900 90.00000 113.54200 90.00000
ZERR  4 0.00040 0.00018 0.00040 0.00000 0.00400 0.00000
LATT 1
SYMM    -X, .50+Y, .50-Z
SFAC C H N O
UNIT 44 52 4 8
OMIT     1   1   0
OMIT     2   0   0
L.S. 20
FMAP 2
PLAN 5
WPDB -2
HTAB
BOND $H
CONF
LIST 4
TEMP -148.0
ACTA
SIZE 0.120 0.040 0.010
DFIX 0.9800 0.0050 N1 H1
WGHT    0.054300    0.351000
FVAR       1.54571
O2    4    0.138907    0.655646    0.572362    11.00000    0.02239    0.02421 =
         0.04459   -0.00286    0.01116    0.00492
O9    4    0.524099    0.360982    0.732226    11.00000    0.01878    0.02250 =
         0.02443    0.00196    0.00172    0.00084
N1    3    0.343026    0.538647    0.666343    11.00000    0.01876    0.01958 =
         0.02103   -0.00089    0.00618    0.00005
C2    1    0.213674    0.529085    0.590499    11.00000    0.01803    0.02237 =
         0.02249    0.00023    0.00904    0.00000
C3    1    0.186649    0.338622    0.536697    11.00000    0.01646    0.02112 =
         0.01986    0.00019    0.00735    0.00010
AFIX  13
H3    2    0.118063    0.278062    0.555953    11.00000   -1.20000
AFIX   0
C4    1    0.142019    0.351934    0.400797    11.00000    0.02235    0.02589 =
         0.01851    0.00182    0.00337    0.00353
AFIX  13
H4    2    0.076610    0.452316    0.370578    11.00000   -1.20000
AFIX   0
C5    1    0.257136    0.399817    0.373657    11.00000    0.03564    0.02914 =
         0.01896    0.00255    0.01197   -0.00214
AFIX  43
H5    2    0.252827    0.497740    0.321505    11.00000   -1.20000
AFIX   0
C6    1    0.364461    0.302442    0.424076    11.00000    0.02769    0.03298 =
         0.02256   -0.00320    0.01481   -0.00457
AFIX  43
H6    2    0.437678    0.326594    0.406841    11.00000   -1.20000
AFIX   0
C7    1    0.367824    0.152241    0.509531    11.00000    0.01845    0.02543 =
         0.02136   -0.00234    0.00809    0.00278
AFIX  13
H7    2    0.459621    0.114654    0.554470    11.00000   -1.20000
AFIX   0
C8    1    0.315491    0.234284    0.597172    11.00000    0.01769    0.01906 =
         0.01655    0.00123    0.00643    0.00066
AFIX  13
H8    2    0.305048    0.134541    0.648197    11.00000   -1.20000
AFIX   0
C9    1    0.408177    0.378470    0.673302    11.00000    0.02006    0.01930 =
         0.01564    0.00282    0.00697    0.00058
C10   1    0.079918    0.169686    0.341142    11.00000    0.02265    0.03344 =
         0.02299   -0.00462    0.00347   -0.00045
AFIX  23
H10A  2   -0.012158    0.170158    0.328871    11.00000   -1.20000
H10B  2    0.083482    0.163508    0.262606    11.00000   -1.20000
AFIX   0
C11   1    0.143515   -0.002303    0.410394    11.00000    0.02667    0.02686 =
         0.02674   -0.00670    0.00743   -0.00420
AFIX  23
H11A  2    0.101917   -0.110943    0.362070    11.00000   -1.20000
H11B  2    0.125569   -0.006824    0.482354    11.00000   -1.20000
AFIX   0
C12   1    0.289489   -0.018729    0.447266    11.00000    0.02769    0.02560 =
         0.02388   -0.00453    0.00824    0.00193
AFIX  23
H12A  2    0.306465   -0.044089    0.376183    11.00000   -1.20000
H12B  2    0.321016   -0.125469    0.500678    11.00000   -1.20000
AFIX   0
H1    2    0.384958    0.650916    0.705833    11.00000    0.03840
HKLF 4


REM  DSAA14
REM wR2 = 0.0970, GooF = S = 1.041, Restrained GooF = 1.041 for all data
REM R1 = 0.0360 for 1845 Fo > 4sig(Fo) and 0.0364 for all 1886 data
REM 131 parameters refined using 1 restraints

END

WGHT      0.0449      0.3649

REM Instructions for potential hydrogen bonds
EQIV $1 -x+1, y+1/2, -z+3/2
HTAB N1 O9_$1

REM Highest difference peak  0.252,  deepest hole -0.190,  1-sigma level  0.043
Q1    1   0.1614  0.3499  0.4652  11.00000  0.05    0.25
Q2    1   0.2481  0.2816  0.5652  11.00000  0.05    0.25
Q3    1   0.1992  0.4317  0.5565  11.00000  0.05    0.22
Q4    1   0.3366  0.1986  0.5487  11.00000  0.05    0.22
Q5    1   0.1160  0.2585  0.3693  11.00000  0.05    0.22
;

_shelx_res_checksum   66837

_shelx_hkl_file
;
  -1   0   0 1201.00    3.01
   1   0   0 1223.57    3.01
  -1   0   1    0.05    0.11
   1   0  -1    0.06    0.08
   0  -1   0    0.02    0.05
   0  -1   0    0.08    0.15
   0   1   0   -0.14    0.16
   0   1   0    0.08    0.06
   1   0   1    1.50    0.13
  -1   0  -1    0.07    0.08
   0  -1   1 1775.23    4.60
   0  -1   1 1730.69    4.66
   0  -1  -1 1706.09    4.60
   0  -1  -1 1731.67    4.50
   0   1   1 1763.90    4.53
   1   0  -2 2902.60    7.41
  -1   0   2 2893.16    7.41
  -1  -1   0 6354.65   14.41
  -1  -1   1 3408.58    7.97
  -1   1   1 3343.66    8.09
  -2   0   1    0.34    0.13
   2   0  -1    0.06    0.15
   2   0   0 5200.77   12.11
  -2   0   0 5163.52   11.92
  -1   1  -1 2095.71    5.56
  -1  -1  -1 2139.84    5.35
  -1   1   2 9052.63   20.87
   0  -1  -2 3106.78    7.26
   0  -1  -2 3045.07    8.13
   0  -1   2 3039.95    7.66
   0  -1   2 3110.89    7.48
   2   1  -1  465.79    1.91
   1   0   2 2003.11    5.12
  -1   0  -2 2162.65    5.05
   2   1   0 1748.78    4.82
   2  -1   0 1706.84    4.62
   2   0   1    0.01    0.19
  -2  -1   2 3099.40    7.76
  -2   1   2 3075.63    7.49
  -2   0   3    0.22    0.09
   2   0  -3    0.09    0.11
   0   0  -3    0.01    0.06
   0   0  -3    0.10    0.34
   0   0   3    0.59    0.05
   3   0  -1    0.33    0.25
   1   1   2  437.17    1.69
  -1  -1  -2  426.28    1.58
   0  -2   0   71.67    0.85
   2  -1   1  648.73    2.35
   2   1   1  659.03    2.44
   0  -2  -1   19.05    0.40
   0  -2   1   16.53    0.52
   3   0   0  596.02    2.36
   1  -2   0   24.21    0.51
  -1   2   0   24.74    0.37
  -2   1   3 5992.88   13.73
   2  -1  -3 5968.56   14.94
   1   2  -1 2508.53    7.14
   0   1   3 5308.25   12.27
   0  -1   3 4635.78   12.29
   0  -1   3 6421.14   12.95
   0  -1  -3 6418.59   14.29
   0  -1  -3 5394.33   12.04
   3   1  -1  329.82    1.74
   3  -1  -1  311.14    1.61
   3   0  -3    0.20    0.17
   3  -1  -2  365.33    1.71
   2   0   2 1994.88    5.35
   1   2   1  301.23    1.76
  -1  -2  -1  303.52    1.59
   1  -2   1  300.23    1.65
   1   0   3    0.07    0.12
  -1   0  -3    2.35    0.14
   1  -2  -2    2.37    0.29
   1  -2  -2    2.04    0.24
   3   1   0  539.83    2.43
   3  -1   0  588.40    2.41
   0  -2  -2  118.16    1.12
   0   2  -2  120.33    0.75
   0  -2   2  120.96    1.05
   2   2  -1 6687.68   16.31
   3   1  -3 3489.67    8.97
   3   0   1    0.12    0.22
   2   2   0 2765.26    7.71
   2  -2   0 2503.53    7.18
   2  -1   2 2063.55    5.63
   2   1   2 2046.34    5.68
   2  -2  -2  362.11    1.75
  -2  -2   2  369.63    1.44
  -1  -1  -3  189.18    0.96
   1   1   3  177.06    1.03
   1  -1  -4 2416.33    8.01
  -1  -1   4 2433.34    6.15
   2  -1  -4  947.73    2.57
   2  -1  -4  949.23    4.17
   2   1  -4  943.81    3.17
   3   0  -4 1714.94    4.64
   1   2   2 1317.19    4.39
   1  -2   2 1346.76    4.34
   4   0  -1    0.19    0.27
   3  -1   1 3795.82    9.71
   3   1   1 3759.70    9.82
   2   2   1 6799.20   16.72
   1  -2  -3  753.41    3.49
   1  -2  -3  749.68    2.71
   4   0  -3    0.41    0.24
   2   2  -3 1129.94    4.28
   2  -2  -3 1134.44    4.27
   0  -1  -4  427.21    2.65
   0   1  -4  423.13    2.36
   0  -1   4  421.35    1.41
   3  -1  -4 1815.44    6.18
   3  -1  -4 1809.15    4.87
   3   2  -1    6.90    0.44
   2   0   3    0.39    0.17
   4  -1  -1  187.19    1.41
   4   1  -1  202.64    1.54
   4   0   0 7753.55   18.47
   3  -2  -2    1.62    0.26
   3   0   2   56.45    0.70
   4   1  -3  495.62    2.43
   4  -1  -3  492.58    2.23
   3   2   0    2.75    0.36
   3  -2   0    2.87    0.30
  -1   0  -4 2249.44    5.66
   1   0   4 2277.34    5.60
   4   0  -4    1.80    0.23
   2  -1   3  325.59    1.68
   2   1   3  327.64    1.70
   4   1   0  859.10    3.55
   4  -1   0  881.01    3.45
   3   2  -3 2773.91    8.12
   3  -2  -3 2672.26    7.21
   0  -3   0    0.49    0.38
   2  -2   2  875.62    3.45
   2   2   2  934.47    3.72
   3   1   2  715.92    2.97
   3  -1   2  705.38    2.89
   1   2   3  255.06    1.62
  -1  -2  -3  255.66    2.01
   3   0  -5    0.17    0.13
   0  -3   1 4002.53   11.03
   0  -3  -1 3940.51   10.95
   1   3   0  938.56    4.23
  -1   3   0  946.70    2.90
  -1  -1  -4   12.29    0.24
   1   1   4   13.11    0.29
  -1  -3   1    3.14    0.44
   1  -2  -4 2241.76    5.89
  -1  -2   4 2231.94    6.50
   2   1  -5 6140.55   15.95
   2  -1  -5 6099.64   16.55
   2  -2  -4   14.82    0.34
   2  -2  -4   14.46    0.60
   2   2  -4   14.81    0.37
   4   1  -4 2380.63    7.13
   4  -1  -4 2605.67    6.97
   4   0   1    0.78    0.28
   3  -2   1 2851.23    8.15
   3   2   1 2926.45    8.57
   1  -1  -5    2.80    0.51
  -1  -1   5    3.49    0.13
   1   1  -5    3.33    0.44
  -1  -3  -1 3442.38    8.76
   1  -3   1 3455.29    9.56
   3  -1  -5 2733.93    8.92
   3   1  -5 2738.34    8.28
   3  -1  -5 2717.85    6.59
   1  -3  -2    5.50    0.39
  -1  -3   2    6.02    0.48
   0  -2  -4  453.13    3.00
   0  -2  -4  449.22    2.00
   0   2  -4  475.20    2.57
   0  -2   4  467.34    2.16
   5   0  -3    0.08    0.26
   0  -3   2 1294.90    4.96
   0  -3  -2 1306.23    4.59
   4  -2  -2  593.31    2.75
   2   3  -1  150.61    1.62
   3  -2  -4  152.81    1.44
   3   2  -4  149.11    1.45
   3  -2  -4  151.52    1.07
   4  -1   1  143.88    1.29
   4   1   1  143.81    1.35
   4  -2  -1 2370.81    7.16
   4   2  -1 2453.21    7.80
   5   0  -1    0.00    0.29
  -2  -3   0  428.65    1.77
   2  -3   0  431.81    2.47
   4   0  -5    0.06    0.17
   2  -3  -2 1876.60    6.04
   4   2  -3   57.12    0.96
   4  -2  -3   38.86    0.65
   0   1  -5  149.75    1.68
   0  -1  -5  149.26    1.82
   3   0   3    0.52    0.21
   2   0   4  589.27    2.31
   5   1  -3   34.63    0.74
   5  -1  -3   51.79    0.82
   5   0  -4 2426.31    7.18
   2  -2   3  333.87    1.93
   2   2   3  346.97    2.06
  -1  -3  -2  678.78    3.24
   1  -3   2  666.58    3.20
   4  -2   0  924.38    3.81
   4   2   0  923.13    4.14
   5   1  -1    1.13    0.36
   5  -1  -1    1.27    0.34
   4   1  -5   73.62    0.90
   4  -1  -5   74.97    0.73
  -2  -3  -1 3093.64    8.60
   2   3   1 3091.48    9.58
   2  -3   1 3078.38    8.90
   1  -3  -3    1.08    0.28
  -1  -3   3    0.87    0.30
   1  -3  -3    0.61    0.28
   3  -2   2 1386.84    4.85
   3   2   2 1389.47    5.17
   5   0   0 1550.82    5.46
   3   1   3  850.67    3.42
   3  -1   3  851.56    3.39
   4   0   2  958.54    3.82
   2  -1   4   31.54    0.53
   2   1   4   35.14    0.54
   2   0  -6 4543.10   14.12
   2  -3  -3    0.74    0.27
  -1  -2  -4 2077.42    7.65
   1   2   4 2067.56    6.12
   2  -2  -5 1105.01    3.21
   2  -2  -5 1103.63    5.27
   0  -3  -3  704.02    3.27
   0  -3   3  696.78    3.37
   4  -2  -4 1557.03    4.97
   4   2  -4 1479.76    5.73
   5  -1  -4  278.27    1.80
   5   1  -4  273.55    1.99
   3   3  -1 1871.64    6.98
   3   0  -6 9999.00   25.62
   3  -3  -2  241.25    1.78
   1   2  -5    6.85    0.44
   1  -2  -5    5.82    0.17
   3  -2  -5   21.26    0.40
   3  -2  -5   20.26    0.71
   3   2  -5   19.32    0.59
   5   1   0  334.97    2.31
   5  -1   0  340.50    2.23
   4  -1   2  212.10    1.64
   4   1   2  204.19    1.71
   3  -3   0    2.22    0.37
   3   3   0    2.14    0.44
   2   1  -6  464.45    3.18
   2  -1  -6  426.74    3.35
  -1  -1  -5 1837.42    7.46
  -1   1  -5 1853.61    7.11
   1  -1   5 1837.05    5.05
   5   0  -5    0.32    0.26
   4   2   1   76.16    1.12
   4  -2   1   81.50    1.10
   3  -1  -6 3647.61   11.87
   3   1  -6 3752.20   11.29
   3  -3  -3  533.08    2.73
   3   3  -3  514.28    3.29
  -2  -3  -2 1533.82    5.71
   2   3   2 1530.61    5.95
   4   0  -6 1522.17    5.97
   4   0  -6 1469.83    4.38
   1  -1  -6   40.20    1.10
   1   1  -6   40.70    1.03
  -1   3  -3 6617.65   15.88
   1  -3   3 6598.33   16.70
   0   2  -5    0.22    0.31
   0  -2  -5    0.54    0.12
   5   2  -2  144.97    1.64
   5   0   1   -0.06    0.29
   5   1  -5   27.27    0.92
   5   1  -5   29.45    0.66
   5  -1  -5   29.29    0.57
   5   1  -5   28.86    0.89
  -1  -3   4  109.55    1.27
   1  -3  -4  107.86    1.44
   5  -2  -3 1233.03    4.66
   5   2  -3 1191.18    5.22
   2  -3  -4   41.02    0.86
  -2  -3   4   40.95    0.89
   0   0  -6 1742.83    6.04
   0   0  -6 1860.81    8.04
  -3   3  -1 6168.03   16.94
   3   3   1 6142.22   16.81
   3  -3   1 6149.34   16.07
   3   3   1 6188.85   16.57
   5  -2  -1  285.68    2.08
   5   2  -1  282.27    2.83
   5   2  -1  278.13    2.32
   4  -2  -5 4883.47   15.74
   4  -2  -5 4933.98   12.33
   6   0  -3   -0.06    0.29
   4  -1  -6 2210.41    7.93
   4  -1  -6 2213.48    9.10
   4   1  -6 2198.17    6.65
   4  -1  -6 2226.40    8.42
   4   1  -6 2207.61    8.54
   4  -1  -6 2225.54    5.79
   6   0  -2 3848.10   12.23
   6   0  -2 3793.20   12.70
   3   0   4   10.94    0.47
   3   0   4   10.54    0.56
  -3   0  -4   10.67    0.71
   3   0   4   10.51    0.37
   3   2   3  588.67    3.23
   3   2   3  595.24    4.28
   3   2   3  588.15    3.07
  -3   2  -3  588.63    3.24
  -3   2  -3  591.82    4.06
   2   2   4  168.40    1.44
   2  -2   4  174.12    1.39
  -2  -2  -4  170.94    1.99
   2   2   4  168.60    2.24
  -5   1  -1 4802.55   13.47
   5   1   1 4830.29   13.26
   0  -3   4  186.57    1.62
   0   3   4  197.14    2.70
   0   3  -4  185.53    1.87
   0   3  -4  184.73    1.70
   0  -3  -4  181.35    1.48
   0  -3  -4  195.14    2.05
   0   3  -4  189.04    1.33
   0  -3  -4  185.14    1.98
   4  -3  -2    2.99    0.36
   4   3  -2    2.30    0.46
   4   3  -2    2.19    0.45
   4   3  -2    2.55    0.38
  -4   3   2    2.52    0.42
   3  -3  -4  414.81    2.95
   3  -3  -4  417.36    2.75
   6   0  -4  135.14    1.42
   6   0  -4  128.92    1.75
   6   0  -4  132.41    2.04
   6   0  -4  133.19    1.64
   5   2  -4   40.28    1.00
   5   2  -4   40.87    0.91
   5  -2  -4   40.47    1.21
   5   2  -4   39.84    1.00
   5  -2  -4   40.78    0.74
   5  -2  -4   38.75    0.95
   0  -1  -6 1165.26    5.45
   0   1  -6 1162.86    5.75
   0   1  -6 1131.18    4.80
   0   1  -6 1117.76    4.57
   0  -1  -6 1154.62    5.07
   0  -1  -6 1121.24    5.96
   0  -1  -6 1148.41    6.14
   0   1  -6 1150.23    6.26
   2   0   5    0.35    0.29
  -2   0  -5   -0.11    0.33
  -2   0  -5    0.02    0.49
   4   3  -1  676.62    3.66
   4   3  -1  681.81    3.96
   4   3  -1  686.06    4.41
  -4   3   1  679.06    3.91
   4   0   3    0.15    0.26
   4   0   3    0.11    0.30
   4   0   3    0.27    0.33
   6   1  -3  649.79    3.93
   6   1  -3  634.63    4.40
   6   1  -3  646.81    3.50
   6   1  -3  626.12    4.02
   6  -1  -3  627.24    3.82
   6  -1  -3  656.13    3.35
   6   1  -3  643.84    4.18
   6  -1  -3  649.34    3.68
   6  -1  -3  649.51    4.62
   0   4   0 1744.74    8.36
   0   4   0 1781.23    6.54
   6   0  -1    0.12    0.31
   6   0  -1    0.24    0.39
   6   1  -2   64.23    1.38
   6   1  -2   67.34    1.31
   6   1  -2   63.63    1.10
   6  -1  -2   67.32    1.44
   6   1  -2   67.69    1.23
   6   1  -2   69.70    1.33
   4   3  -3  374.97    3.06
   4   3  -3  383.85    3.24
   4   3  -3  388.49    2.95
   4  -3  -3  389.04    2.89
   4  -3  -3  383.14    2.38
   4  -3  -3  378.70    2.66
   5  -2   0    4.62    0.40
   5   2   0    3.87    0.48
   5   2   0    4.59    0.57
   5   2   0    3.84    0.45
  -5   2   0    4.95    0.40
   5   2   0    4.54    0.41
   5   2   0    4.80    0.44
   3   1   4  387.88    3.21
  -3   1  -4  384.84    3.49
   3   1   4  380.52    2.78
   3   1   4  380.55    2.24
   3  -1   4  386.78    2.74
   3   1   4  392.33    2.53
   5   0  -6  164.25    2.28
   5   0  -6  158.54    1.98
   5   0  -6  162.89    1.76
   5   0  -6  163.06    2.09
   5   0  -6  160.13    1.32
   5   0  -6  153.47    1.66
   5   0  -6  155.86    1.79
   0   4  -1  879.78    4.43
   0  -4   1  894.46    4.42
   0   4  -1  878.63    4.19
   0   4   1  883.20    4.21
   0  -4  -1  894.52    4.35
   0   4  -1  887.67    5.33
   4   2   2 1377.76    5.55
   4   2   2 1402.72    5.63
  -4   2  -2 1399.89    5.62
   4   2   2 1391.84    6.96
   4  -2   2 1393.41    5.30
   2   2  -6  211.34    1.92
   2  -2  -6  203.06    2.42
   2  -2  -6  193.25    2.28
   2   2  -6  193.90    1.71
   2  -2  -6  203.02    2.17
   2  -2  -6  199.45    2.07
  -1   4   0  177.38    1.96
  -1   4   0  174.45    1.70
  -1   4   0  176.01    2.34
   1   4   0  170.58    2.48
  -1  -4   1    0.60    0.41
  -1   4   1    0.76    0.39
   1   4  -1    0.39    0.34
   1   4  -1    0.62    0.37
   1  -4  -1    0.72    0.36
  -1   2  -5 1238.56    6.48
  -1  -2  -5 1235.56    6.17
  -1   2  -5 1258.47    5.51
  -1   2  -5 1220.66    4.97
   1   2   5 1237.78    6.60
  -1   2  -5 1228.50    5.26
  -1  -2  -5 1208.86    3.98
   1  -2   5 1231.45    4.19
  -1   2  -5 1219.59    4.93
   6   1  -4 1782.52    7.59
   6  -1  -4 1800.48    7.22
   6   1  -4 1831.29    8.24
   6  -1  -4 1816.72    6.98
   6   1  -4 1808.50    7.83
   6  -1  -4 1820.95    6.25
   6   1  -4 1815.00    7.27
   6   1  -4 1853.05    6.73
   6  -1  -4 1767.73    7.08
   6  -1  -4 1824.54    8.55
   6   1  -4 1811.97    6.63
   3  -2  -6 1850.47    6.91
   3  -2  -6 1776.68    7.39
   3   2  -6 1816.13    6.02
   3  -2  -6 1816.32    6.52
   3   2  -6 1805.03    6.53
   3  -2  -6 1813.47    8.21
   3  -2  -6 1827.94    7.38
   3  -2  -6 1831.50    6.89
  -2  -3  -3 1555.03    6.48
  -2   3  -3 1530.99    6.27
  -2   3  -3 1521.76    6.01
  -2   3  -3 1531.01    5.85
   2   3   3 1552.84    6.04
   2  -3   3 1537.01    5.68
   2   3   3 1511.25    6.70
   2   3   3 1499.97    5.93
  -2   3  -3 1584.23    5.79
   2   3   3 1554.68    8.11
  -2  -1  -5  453.28    3.83
   2   1   5  451.06    3.52
  -2   1  -5  445.31    2.65
   2  -1   5  456.08    2.97
  -2   1  -5  440.92    3.86
   2   1   5  461.38    2.73
  -2  -1  -5  461.13    3.25
   4   3   0  776.83    4.31
  -4   3   0  777.44    4.28
   4   3   0  769.91    4.69
   4  -3   0  781.98    3.82
   4   1   3  838.17    3.96
  -4   1  -3  832.73    4.09
   4   1   3  816.18    4.84
   4   1   3  815.28    4.46
  -4   1  -3  833.40    5.20
   4  -1   3  863.75    3.81
   4   1   3  842.57    3.80
   6   1  -1  470.88    3.06
   6   1  -1  474.16    3.70
   6  -1  -1  464.66    2.90
   6   1  -1  464.08    3.31
   3   0  -7    0.65    0.40
   3   0  -7   -0.15    0.48
   3   0  -7    0.03    0.36
   3   0  -7    0.39    0.39
   2   0  -7    0.48    0.36
   2   0  -7    0.11    0.37
   2   0  -7    0.04    0.51
   2   0  -7    0.74    0.37
   1   2  -6 1824.80    6.81
   1  -2  -6 1840.71    7.51
   1  -2  -6 1833.36    7.48
   1   2  -6 1836.68    7.06
  -3   3  -2    4.40    0.46
  -3   3  -2    4.07    0.49
   3   3   2    5.03    0.70
  -3   3  -2    4.18    0.39
   3   3   2    4.26    0.42
  -3   3  -2    3.44    0.39
   3   3   2    4.09    0.42
   3   3   2    4.73    0.50
   3  -3   2    4.18    0.38
   3   3   2    4.95    0.43
   6   0  -5    3.05    0.62
   6   0  -5    1.77    0.48
   6   0  -5    2.64    0.53
   1  -4   1    0.45    0.33
   1   4   1    0.45    0.61
  -1  -4  -1    0.36    0.40
  -1   4  -1    0.43    0.31
   1   4   1    1.02    0.35
   1   4   1    0.83    0.42
  -1   4  -1    0.53    0.40
  -1   4  -1    0.30    0.42
   5   1  -6  218.42    2.14
   5  -1  -6  224.02    2.07
   5   1  -6  221.15    1.94
   5   1  -6  220.63    1.79
   5  -1  -6  231.91    1.51
   5  -1  -6  212.91    2.07
   5  -1  -6  227.70    2.14
   5   1  -6  222.19    2.43
   5  -1  -6  226.63    2.47
   1   4  -2  236.36    2.12
  -1   4   2  226.31    2.19
   1   4  -2  225.24    2.26
  -1   4   2  221.77    2.94
   1   4  -2  221.00    2.06
   1  -4  -2  238.70    2.06
  -1  -4   2  218.68    2.13
  -1   0  -6 1508.39    7.72
   1   0   6 1501.00    5.45
  -1   0  -6 1496.33    5.70
  -1   3  -4    0.25    0.22
  -1  -3  -4    0.58    0.29
   1   3   4    0.17    0.59
  -1   3  -4    0.50    0.37
  -1  -3  -4   -0.19    0.37
  -1   3  -4    0.35    0.25
  -1  -3  -4    0.03    0.37
  -1   3  -4    0.77    0.37
   5   0   2 2329.30    8.52
   5   0   2 2393.67    8.50
   5   0   2 2291.47    7.65
  -5   0  -2 2350.36    9.38
   5   0   2 2402.52    7.74
   5  -2  -5  248.96    2.32
   5  -2  -5  240.27    2.35
   5   2  -5  234.70    2.45
  -5   2   5  242.62    2.37
   5   2  -5  244.77    2.73
   5   2  -5  231.48    2.10
   5   2  -5  229.78    2.38
   5   2  -5  246.89    2.20
   5  -2  -5  234.79    2.91
   5  -2  -5  241.12    1.73
   0   4  -2  442.91    3.09
   0   4   2  449.39    4.35
   0   4   2  455.63    2.89
   0   4  -2  446.03    2.94
   0   4  -2  456.36    3.45
   0  -4  -2  458.91    2.96
   2  -3  -5 1409.36    5.63
   2  -3  -5 1408.56    6.24
  -2   3   5 1364.77    6.12
   2  -3  -5 1387.63    4.60
   2  -3  -5 1388.65    6.12
   2   3  -5 1395.11    5.45
  -2  -3   5 1417.17    5.48
  -2   3   5 1394.66    7.58
   2   3  -5 1374.60    5.72
   2  -3  -5 1398.43    6.92
   2   4  -1   31.42    0.95
  -2   4   1   34.43    1.11
   2   4  -1   32.83    1.16
   2   4  -1   31.35    0.85
   4   3  -4  426.80    2.76
  -4   3   4  442.73    3.53
   4  -3  -4  428.88    2.96
   4  -3  -4  423.07    3.68
   4  -3  -4  445.00    3.24
   4  -3  -4  430.22    2.45
  -4   3   4  436.71    3.26
   4   3  -4  446.05    3.24
   4   3  -4  423.21    3.29
   4   3  -4  437.35    3.56
   6   0   0 2177.20    8.51
   6   0   0 2200.20    7.09
   2  -4   0 2084.65    7.42
  -2   4   0 2090.77    7.13
   2   4   0 2098.24    9.90
   2   4   0 2071.85    7.61
   1   3  -5  482.16    2.90
   1   3  -5  464.22    2.19
  -1  -3   5  480.59    2.69
   1  -3  -5  468.08    3.47
   1  -3  -5  484.17    2.24
  -1   3   5  480.67    3.25
  -1   3   5  479.08    4.36
   4   0  -7    0.30    0.39
   4   0  -7    0.03    0.40
   4   0  -7    1.06    0.47
   4   0  -7    0.98    0.38
   3  -1  -7 1232.73    6.08
   3   1  -7 1126.03    4.61
   3   1  -7 1164.89    5.83
   3  -1  -7 1181.29    5.69
   3  -1  -7 1064.32    5.95
   3  -1  -7 1145.29    6.33
   3   1  -7 1160.89    5.66
   3  -1  -7 1143.04    5.11
   3   1  -7 1192.96    5.74
   4  -2  -6  282.63    2.74
   4   2  -6  264.45    2.13
   4   2  -6  265.37    2.14
   4  -2  -6  276.03    1.53
   4  -2  -6  278.11    2.36
   4  -2  -6  282.58    2.52
   4  -2  -6  272.99    2.28
   4  -2  -6  254.98    2.16
   4   2  -6  271.75    2.78
   4  -2  -6  265.83    3.01
   2   1  -7 1873.64    7.66
   2   1  -7 1866.55    8.07
   2  -1  -7 1901.69    7.95
   2  -1  -7 1866.49    8.27
   2  -1  -7 1878.32    8.35
   2   1  -7 1883.99    7.02
   2  -1  -7 1898.20    6.96
   1   0  -7    0.13    0.50
   1   0  -7    0.12    0.47
   1   0  -7    0.03    0.34
   1   0  -7    0.14    0.37
   1   0  -7    0.61    0.37
  -2   4   2  181.15    2.54
  -2   4   2  171.64    2.01
  -2  -4   2  176.46    2.15
   2  -4  -2  170.37    1.70
   2  -4  -2  180.75    1.92
   2   4  -2  169.69    2.06
   6  -1  -5   16.93    0.73
   6   1  -5   18.27    0.66
   6  -1  -5   17.72    0.73
   6   1  -5   16.54    0.86
   6  -1  -5   16.65    0.78
   6   1  -5   17.90    0.84
  -6   1   5   18.40    0.70
   6   1  -5   17.33    0.79
   6   1  -5   18.20    0.69
   6  -1  -5   16.39    0.71
   6  -1  -5   18.18    0.97
   6  -1  -5   18.59    0.55
   6  -1  -5   17.45    0.68
   3  -3  -5 1032.30    5.95
   3  -3  -5 1028.32    3.84
   3   3  -5 1022.71    4.64
  -3   3   5 1062.23    6.27
   3   3  -5 1059.84    4.54
   3  -3  -5 1025.97    5.18
  -3  -3   5 1078.50    5.10
   3  -3  -5 1035.65    4.84
   3   3  -5 1010.34    4.46
  -1   1  -6    0.74    0.32
  -1   1  -6    0.82    0.45
  -1  -1  -6    0.82    0.53
   1   1   6    0.67    0.42
  -1   1  -6    0.34    0.37
  -1  -1  -6    0.80    0.38
  -1  -1  -6    0.35    0.44
   1   1   6    2.10    0.32
  -1  -1  -6    0.36    0.50
   5   2   1  165.62    1.96
   5   2   1  168.45    1.86
  -5   2  -1  176.96    1.82
   5   2   1  170.06    2.05
   5  -2   1  173.83    1.74
   5   2   1  169.75    2.31
   5   2   1  165.94    1.76
  -5   1  -2   37.15    1.13
   5  -1   2   40.79    0.83
   5   1   2   36.40    0.97
  -5   1  -2   37.02    0.86
   5  -1   2   43.48    0.98
   5  -1   2   33.65    0.79
   5   1   2   42.11    1.27
   5   1   2   37.61    0.85
   5   1   2   39.24    1.08
   4   3   1  884.50    5.72
   4   3   1  968.38    6.23
   4   3   1  942.25    5.34
   4   3   1  981.95    4.79
   4   3   1  949.76    4.75
  -4   3  -1  946.58    4.36
   4  -3   1  972.01    4.37
   4   3   1  901.17    4.79
  -4   3  -1  942.05    4.82
  -4   3  -1  967.98    4.81
   6  -1   0 1392.21    5.10
   6   1   0 1346.54    6.75
   6  -1   0 1332.41    5.58
   6  -1   0 1357.70    6.41
   6   1   0 1356.64    6.14
   6   1   0 1357.25    6.31
   6   1   0 1381.11    5.43
   6   1   0 1423.33    6.40
   6   1   0 1425.45    5.93
  -6   1   0 1314.76    5.49
   0   2  -6  158.27    1.94
   0   2   6  162.67    2.37
   0   2  -6  165.40    1.68
   0  -2  -6  160.85    2.07
   0  -2  -6  158.64    2.03
   0   2  -6  158.31    1.58
   0   2  -6  162.53    1.79
   0   2  -6  156.19    2.28
   1   4   2  995.39    4.81
  -1   4  -2  995.93    4.64
  -1   4  -2  991.48    5.22
   1   4   2 1012.86    5.60
   1  -4   2 1011.06    4.71
   4  -1  -7  563.20    3.50
   4   1  -7  564.01    4.06
   4   1  -7  594.35    3.65
   4  -1  -7  574.46    4.48
   4  -1  -7  574.64    4.06
   4   1  -7  586.32    3.50
   4  -1  -7  568.96    3.36
   4  -1  -7  586.89    4.00
   4   1  -7  567.81    3.44
   4   1  -7  561.83    3.71
   6   2  -3  267.13    2.72
   6  -2  -3  266.88    2.34
   6   2  -3  267.54    3.00
   6   2  -3  262.85    2.61
   6  -2  -3  260.77    2.99
   6  -2  -3  270.71    2.61
   6   2  -3  262.32    2.55
  -6   2   3  262.83    2.36
   6  -2  -3  255.07    2.11
   6  -2  -2  908.61    4.50
   6   2  -2  913.87    5.74
   6   2  -2  934.67    5.03
   6  -2  -2  916.38    5.01
   6  -2  -2  913.00    5.59
  -6   2   2  928.43    4.36
   6   2  -2  939.39    5.28
   6   2  -2  900.92    4.84
   6   2  -2  954.42    4.42
   6   2  -2  909.31    5.18
   2   4   1   16.38    0.68
  -2  -4  -1   12.78    0.65
   2  -4   1   15.91    0.60
  -2   4  -1   15.13    0.61
  -2   4  -1   15.16    0.72
   2   4   1   14.59    1.00
  -2   4  -1   14.35    0.70
   2   4   1   15.31    0.74
   1  -4  -3  160.44    1.61
  -1  -4   3  166.20    1.85
   1   4  -3  172.63    1.89
  -1   4   3  166.66    1.92
  -1   4   3  171.91    2.74
   1   4  -3  177.05    1.98
   1   1  -7  869.00    4.35
   1  -1  -7  820.80    5.38
   1   1  -7  838.09    5.43
   1   1  -7  815.95    5.11
   1  -1  -7  862.29    4.91
   1   1  -7  841.76    4.60
   1  -1  -7  828.02    5.19
   1  -1  -7  813.56    4.34
   1  -1  -7  812.74    4.36
   0  -3  -5 1430.81    4.73
   0   3  -5 1393.74    5.61
   0   3  -5 1417.65    5.30
   0  -3  -5 1441.19    6.70
   0   3  -5 1410.76    6.10
   0  -3   5 1481.31    5.29
   0   3  -5 1388.60    5.71
   0   3   5 1369.59    7.92
   0  -3  -5 1374.61    6.68
   3   2   4  500.31    2.90
  -3   2  -4  496.65    3.12
   3   2   4  484.58    3.12
  -3   2  -4  476.48    2.84
  -3   2  -4  485.73    4.10
   3  -2   4  493.11    2.73
  -3   2  -4  492.18    3.11
   3   2   4  483.50    3.43
   3   2   4  485.80    4.19
   5   3  -2  228.87    2.15
   5   3  -2  221.07    2.28
   5  -3  -2  223.16    2.07
  -5   3   2  219.63    2.28
   5   3  -2  223.67    2.70
   5   3  -2  212.32    2.47
   5   3  -2  232.98    2.47
   5  -3  -2  221.16    1.98
  -5   3   2  231.01    2.31
   5  -3  -2  216.58    2.28
   2   4  -3 2164.76    7.92
   2  -4  -3 2222.42    8.27
   2  -4  -3 2128.41    7.36
   2   4  -3 2185.06    8.51
  -2   4   3 2177.81    8.41
   2   4  -3 2209.51    7.82
  -2   4   3 2219.51   10.28
  -2  -4   3 2273.59    8.58
   6   0  -6  909.67    5.94
   6   0  -6  921.00    4.80
   6   0  -6  902.13    3.98
   6   0  -6  889.97    5.64
   6   0  -6  901.35    4.82
   6   0  -6  934.43    4.67
   6   0  -6  871.76    5.17
   5   3  -3   48.03    0.98
   5  -3  -3   48.87    1.14
   5  -3  -3   47.99    1.02
   5  -3  -3   48.74    0.96
  -5   3   3   51.33    1.12
   5   3  -3   47.19    1.10
   5   3  -3   48.56    1.34
  -5   3   3   47.54    1.12
   0   4  -3  275.52    2.50
   0   4   3  268.18    2.22
   0   4   3  267.65    2.34
   0  -4  -3  273.03    2.52
   0  -4  -3  275.50    2.23
   0   4   3  273.43    3.55
   0   4  -3  252.90    2.42
   0  -4   3  258.42    2.22
   0   4  -3  269.50    2.28
  -6   2   4 1408.43    6.22
   6  -2  -4 1410.40    6.13
   6   2  -4 1445.88    6.36
   6  -2  -4 1423.04    6.61
   6  -2  -4 1407.76    6.64
   6   2  -4 1413.59    6.74
   6  -2  -4 1402.75    7.73
   6   2  -4 1430.06    6.56
   6   2  -4 1401.47    7.48
   6  -2  -4 1432.99    5.58
   3  -4  -1  129.72    1.65
  -3   4   1  128.62    1.81
  -3   4   1  127.36    1.98
   3   4  -1  133.08    2.29
   3   4  -1  133.69    1.98
   3   4  -1  127.00    1.67
  -2   2  -5   84.21    1.78
   2  -2   5   85.45    1.01
  -2  -2  -5   84.66    1.64
  -2   2  -5   82.88    1.24
  -2   2  -5   88.76    1.28
   2   2   5   85.48    1.79
  -2  -2  -5   86.63    1.63
  -2   2  -5   85.61    1.30
   2   2   5   84.05    1.25
   5   0  -7   -0.11    0.45
   5   0  -7    0.01    0.33
   5   0  -7    0.07    0.32
   5   0  -7    0.29    0.42
   5   0  -7    0.34    0.53
   4  -2   3  513.64    2.98
   4   2   3  518.30    3.22
   4   2   3  508.44    3.53
   3   4  -2  982.60    5.40
   3  -4  -2  946.75    4.49
   3   4  -2  964.17    5.50
  -3   4   2  963.72    5.19
  -3   4   2 1006.68    5.92
   3  -4  -2 1001.35    5.01
   5   3  -1    5.30    0.51
   5  -3  -1    5.42    0.50
  -5   3   1    6.36    0.51
   5   3  -1    6.99    0.69
   5   3  -1    4.79    0.44
   5   3  -1    6.46    0.61
   5   3  -1    4.82    0.48
   5  -3  -1    5.34    0.43
   5   3  -1    5.79    0.58
   4   3  -5 2479.57    7.86
   4   3  -5 2492.52    8.08
   4   3  -5 2459.76    9.86
   4  -3  -5 2458.20   10.48
  -4   3   5 2474.70    9.26
   4  -3  -5 2483.71    7.44
   4   3  -5 2491.25    9.08
   4   3  -5 2456.83    9.25
   4   3  -5 2419.87    8.01
   4   3  -5 2459.59    9.21
   4  -3  -5 2396.54    8.60
   6  -2  -1  300.74    2.41
  -6   2   1  301.27    2.41
   6   2  -1  299.39    2.92
   6   2  -1  292.27    2.69
   6   2  -1  303.54    3.17
   6   2  -1  301.28    2.92
   6   2  -1  302.91    2.40
   6  -2  -1  306.46    2.99
  -3   0  -5   -0.08    0.41
   3   0   5    0.24    0.34
   3   0   5    0.02    0.32
  -3   0  -5    0.05    0.54
   3   0   5    0.08    0.39
   0   0  -7    0.81    0.37
   0   0  -7   -0.26    0.54
   0   0  -7   -0.18    0.34
   0   0  -7    0.14    0.51
   0   0  -7   -0.08    0.41
   4   0   4 1994.60    6.64
   4   0   4 2053.23    8.29
   4   0   4 1994.98    7.16
   4   0   4 1957.86    7.75
  -4   0  -4 2018.81    9.41
   7   0  -3   -0.27    0.43
   7   0  -3    0.10    0.49
   7   0  -3    0.17    0.45
   7   0  -3    0.03    0.33
   7   0  -3    0.19    0.38
   7   0  -3    0.01    0.45
   6   0   1   -0.03    0.32
  -6   0  -1    0.16    0.41
   6   0   1   -0.02    0.37
   6   0   1    0.45    0.33
   6   0   1   -0.17    0.38
   5   2  -6  322.56    3.27
   5   2  -6  311.34    3.04
   5  -2  -6  323.82    2.99
   5   2  -6  322.07    2.38
   5   2  -6  312.38    2.86
  -5   2   6  320.48    2.90
   5  -2  -6  315.34    3.48
   5  -2  -6  318.95    2.73
   5   2  -6  310.38    2.49
   5  -2  -6  333.12    2.70
   5  -2  -6  318.39    2.81
   5   2  -6  305.89    2.65
   5  -2  -6  321.36    1.93
  -3   3  -3  160.39    1.92
   3   3   3  164.61    1.86
   3   3   3  161.61    1.96
   3   3   3  159.90    1.82
  -3   3  -3  158.56    2.24
  -3   3  -3  165.54    1.83
  -3   3  -3  163.87    1.77
  -3   3  -3  168.11    1.69
   3  -3   3  158.98    1.62
  -3  -3  -3  163.22    2.01
   3   3   3  158.08    2.05
  -3   4   0 2139.73    7.46
  -3   4   0 2206.12    8.84
   3   4   0 2100.01    8.93
  -3   4   0 2110.62    8.51
   3  -4   0 2079.73    7.67
   3   4   0 2176.91    8.71
   3   4   0 2105.14    8.16
   3   4   0 2135.59   10.41
   2   3   4  218.97    3.07
  -2   3  -4  222.20    2.66
   2   3   4  224.52    2.10
  -2   3  -4  232.69    2.11
  -2   3  -4  227.04    2.08
  -2   3  -4  220.52    2.22
  -2   3  -4  223.09    2.00
   2   3   4  223.12    2.03
  -2  -3  -4  223.83    2.47
  -2  -3  -4  220.47    2.53
   2  -3   4  216.55    1.82
   6  -1  -6   12.09    0.65
   6   1  -6   11.75    0.52
   6   1  -6   10.28    0.63
   6  -1  -6   11.69    0.72
   6  -1  -6    9.73    0.65
   6  -1  -6   12.14    0.67
   6   1  -6   11.56    0.74
   6   1  -6   13.25    0.59
   6   1  -6   11.29    0.63
   6   1  -6   11.75    0.77
   6   1  -6   11.77    0.80
   7   0  -4   63.95    1.48
   7   0  -4   64.22    1.13
   7   0  -4   64.23    1.30
   7   0  -4   64.20    1.38
  -5   3   4  951.39    5.05
   5   3  -4  940.82    5.47
   5   3  -4  945.24    5.81
   5   3  -4  937.46    4.50
   5  -3  -4  959.17    4.83
   5  -3  -4  916.11    6.03
   5   3  -4  906.39    5.14
  -5   3   4  917.59    5.11
   5   3  -4  930.81    5.17
   5  -3  -4  939.03    4.30
   5  -3  -4  941.80    5.22
   7   0  -2 2736.18    9.71
   7   0  -2 2779.17   10.45
   7   0  -2 2727.04   10.66
   7   0  -2 2777.17   10.68
   3   4  -3    0.72    0.30
   3  -4  -3    1.18    0.31
   3   4  -3    1.45    0.40
   3  -4  -3    0.70    0.38
  -3  -4   3    0.80    0.43
  -3   4   3    1.71    0.58
   3   4  -3    1.00    0.45
   3   4  -3    1.07    0.42
   5  -1  -7   43.08    1.40
   5  -1  -7   42.21    0.99
   5   1  -7   37.98    1.02
   5   1  -7   40.79    0.95
   5   1  -7   44.41    1.24
   5  -1  -7   43.37    1.10
   5   1  -7   39.72    1.20
   5   1  -7   42.42    1.22
   5  -1  -7   42.65    1.05
   5   1  -7   42.55    1.02
   5  -1  -7   43.45    1.21
   5   1  -7   44.61    0.94
   5  -1  -7   44.19    1.01
   5   1  -7   40.11    0.74
   3  -2  -7   15.14    0.78
   3  -2  -7   19.51    0.81
   3  -2  -7   17.86    0.69
   3  -2  -7   16.99    0.62
   3   2  -7   17.10    0.64
   3   2  -7   16.51    0.61
   3   2  -7   17.89    0.80
   3   2  -7   16.68    0.68
   3   2  -7   17.95    0.73
  -2  -4  -2  523.97    3.62
  -2   4  -2  549.46    3.81
   2   4   2  547.09    5.24
  -2   4  -2  553.31    3.82
   2   4   2  560.35    3.60
  -2   4  -2  543.25    3.40
   2   4   2  532.78    4.04
   2  -4   2  554.99    3.35
   2  -2  -7 1877.33    7.80
   2  -2  -7 1833.36    8.47
   2  -2  -7 1914.18    6.81
   2   2  -7 1880.95    6.42
   2  -2  -7 1880.79    7.27
   2   2  -7 1803.62    6.90
   2   2  -7 1926.40    7.56
   2   2  -7 1901.83    8.29
   2   2  -7 1909.79    7.28
   2   2  -7 1877.84    7.96
   2  -2  -7 1856.03    8.11
   2   0   6  487.62    2.97
  -2   0  -6  490.72    4.50
   2   0   6  491.14    3.74
  -2   0  -6  490.47    3.42
   3   1   5 1855.82    8.49
  -3   1  -5 1888.91    6.54
   3  -1   5 1811.59    6.77
   3  -1   5 1797.33    7.43
  -3   1  -5 1831.25    9.15
  -3  -1  -5 1844.22    8.97
   3   1   5 1823.07    6.82
   3   1   5 1800.12    7.58
  -3  -1  -5 1862.25    7.76
   0  -1  -7  200.29    2.02
   0   1  -7  204.88    2.55
   0   1  -7  204.57    1.97
   0  -1  -7  210.23    2.39
   0   1  -7  207.83    2.07
   0  -1  -7  212.99    2.74
   0   1  -7  206.30    2.82
   0  -1  -7  206.34    2.69
   0   1  -7  213.86    2.23
   0  -1  -7  201.67    2.14
   4   1   4   96.00    1.35
  -4  -1  -4   91.13    1.83
   4   1   4   93.81    1.53
   4  -1   4   98.57    1.35
  -4   1  -4   92.66    1.91
   4   1   4   92.42    1.75
   4   1   4   99.27    1.28
   4  -1   4   95.92    1.18
   4  -1   4   91.54    1.49
   6  -2  -5  516.99    4.67
   6   2  -5  508.51    3.35
   6  -2  -5  508.09    2.96
   6   2  -5  519.65    3.56
   6   2  -5  512.00    3.89
   6  -2  -5  487.05    3.55
   6   2  -5  508.35    3.69
  -6   2   5  493.97    3.55
   6   2  -5  491.36    3.93
   6  -2  -5  510.49    3.53
   1   4   3   33.90    1.43
  -1   4  -3   32.92    0.91
  -1  -4  -3   33.89    0.87
   1   4   3   32.11    0.86
  -1  -4  -3   33.37    1.00
   1  -4   3   33.31    0.83
  -1   4  -3   33.80    0.99
  -1   4  -3   32.23    0.87
   7   1  -3  647.66    4.74
   7   1  -3  620.97    4.47
   7   1  -3  613.76    4.23
   7   1  -3  632.59    3.85
   7  -1  -3  620.32    3.95
   7  -1  -3  616.62    3.58
   7  -1  -3  613.48    4.70
   7  -1  -3  631.79    4.31
   7   1  -3  607.60    4.43
  -5   3   0  619.15    3.81
   5  -3   0  628.03    3.71
  -5   3   0  600.02    3.87
   5  -3   0  603.86    3.83
   5   3   0  606.32    4.83
   5   3   0  604.06    4.90
   5   3   0  590.61    3.80
   5   3   0  634.22    4.25
   5   3   0  579.05    3.82
   5   3   0  591.02    4.44
   6   1   1  212.96    2.38
   6  -1   1  210.78    2.32
   6  -1   1  216.26    1.89
  -6   1  -1  217.09    2.72
   6  -1   1  213.06    2.01
   6   1   1  215.78    2.03
   6   1   1  211.73    2.11
   4   3   2  155.97    2.11
   4   3   2  153.25    1.93
   4   3   2  167.74    2.56
   4   3   2  164.58    2.61
   4   3   2  158.79    1.93
   4   3   2  159.08    1.90
   4  -3   2  163.56    1.72
  -4   3  -2  154.65    1.88
  -4   3  -2  158.93    1.79
  -4   3  -2  159.37    2.26
   5   0   3    0.03    0.37
   5   0   3    0.01    0.40
   5   0   3    0.11    0.28
   2   3  -6    5.15    0.39
   2  -3  -6    5.43    0.46
   2  -3  -6    5.14    0.44
   2  -3  -6    5.12    0.66
   2  -3  -6    3.76    0.51
  -2   3   6    5.31    0.70
   2  -3  -6    4.78    0.56
   2   3  -6    5.20    0.47
  -2   3   6    5.29    0.55
  -2  -3   6    4.89    0.32
   2   3  -6    4.81    0.52
  -1   2  -6  263.44    2.22
  -1   2  -6  261.97    2.38
  -1  -2  -6  261.76    3.00
  -1  -2  -6  262.83    2.88
   1   2   6  261.47    3.17
  -1   2  -6  264.34    3.18
  -1   2  -6  272.94    2.74
  -1   3  -5  228.33    2.13
  -1   3  -5  230.69    2.05
  -1   3  -5  226.28    2.77
  -1   3  -5  222.41    2.08
  -1   3  -5  235.33    2.11
   1  -3   5  223.33    1.79
   1   3   5  228.76    3.19
   1   3   5  232.34    2.12
  -1  -3  -5  228.67    2.58
  -1  -3  -5  223.62    1.68
  -1  -3  -5  217.00    2.60
  -1   3  -5  226.71    2.30
  -5   2  -2  268.73    3.03
   5   2   2  257.44    2.35
   5  -2   2  264.64    2.22
   5   2   2  257.07    2.38
   5   2   2  276.45    3.15
  -5   2  -2  280.32    2.43
   1   4  -4  107.40    1.47
  -1   4   4  111.84    2.33
   1  -4  -4  112.43    1.88
   1  -4  -4  108.23    1.32
  -1   4   4  108.70    1.62
   1   4  -4  109.23    1.61
   2  -4  -4  561.41    3.83
   2  -4  -4  561.38    4.27
   2   4  -4  551.03    3.76
  -2   4   4  554.95    3.88
  -2  -4   4  576.38    3.69
   2  -4  -4  556.92    3.12
   2   4  -4  562.72    3.49
  -2   4   4  543.13    4.91
   2   4  -4  560.20    3.52
   7  -1  -4  200.35    1.93
   7  -1  -4  197.23    2.35
   7  -1  -4  196.33    2.18
   7   1  -4  197.39    2.67
   7   1  -4  192.06    2.50
   7   1  -4  196.88    2.36
   7   1  -4  217.92    2.24
   7  -1  -4  172.47    2.28
   7   1  -4  193.41    2.12
   7   1  -4  189.05    2.40
   7  -1  -4  196.37    2.84
   6   2   0   61.08    1.30
   6   2   0   65.59    1.57
   6  -2   0   65.41    1.00
   6   2   0   62.53    1.35
   6   2   0   68.18    1.21
  -6   2   0   65.17    1.17
   6   2   0   64.56    1.48
   6  -2   0   61.16    1.13
   6  -2   0   62.93    1.32
   6   2   0   60.71    1.22
   3  -3  -6    8.29    0.51
   3  -3  -6    9.10    0.56
   3   3  -6    8.17    0.53
   3  -3  -6    8.65    0.61
  -3  -3   6    8.02    0.43
   3  -3  -6    8.79    0.59
   3  -3  -6    7.82    0.74
   3   3  -6    9.47    0.54
  -3   3   6    8.08    0.64
   3   3  -6    8.06    0.45
   7  -1  -2  649.73    4.79
   7  -1  -2  644.32    4.44
   7   1  -2  633.93    3.93
   7   1  -2  641.25    4.78
   7   1  -2  639.97    4.56
   7   1  -2  640.73    4.31
   7  -1  -2  635.70    3.95
   7   0  -5    0.05    0.39
   7   0  -5   -0.40    0.51
   7   0  -5    1.01    0.35
   7   0  -5    0.09    0.56
   7   0  -5   -0.23    0.52
   7   0  -5    0.33    0.45
   3   4   1    0.43    0.43
   3   4   1    0.51    0.42
  -3   4  -1    0.31    0.45
   3   4   1    0.59    0.44
  -3   4  -1    0.31    0.32
   3   4   1    0.10    0.52
   3  -4   1    0.68    0.34
   4  -2  -7   99.82    1.61
   4   2  -7   98.77    1.82
   4   2  -7  106.44    1.49
   4   2  -7  103.11    1.30
   4  -2  -7   97.00    2.00
   4  -2  -7  105.80    1.60
   4  -2  -7  103.28    1.58
   4  -2  -7  109.84    1.87
   4  -2  -7  108.81    1.55
   4  -2  -7   96.34    1.39
   7   0  -1    0.02    0.46
   7   0  -1    0.27    0.30
   7   0  -1    0.55    0.34
   7   0  -1    0.07    0.32
   7   0  -1    0.09    0.37
   2  -1   6  280.82    2.59
   2   1   6  285.81    2.27
  -2   1  -6  280.08    2.95
  -2  -1  -6  274.40    3.08
   2   1   6  287.80    3.12
  -2  -1  -6  279.08    3.30
  -2   1  -6  276.95    3.42
  -2  -1  -6  290.20    2.79
  -2   1  -6  275.03    2.24
   1   2  -7  483.65    2.95
   1   2  -7  503.17    3.42
   1  -2  -7  493.39    3.88
   1   2  -7  544.24    4.00
   1   2  -7  478.18    4.12
   1  -2  -7  522.88    4.48
   1  -2  -7  501.77    3.90
   3   0  -8  955.99    5.73
   3   0  -8  979.90    5.87
   3   0  -8  940.33    5.47
   3   0  -8  931.91    4.56
   3   0  -8  959.19    5.05
   3   0  -8  951.46    5.61
   3   0  -8  953.68    5.13
   1   3  -6 1122.23    5.45
   1   3  -6 1122.08    4.96
  -1   3   6 1126.41    5.61
  -1   3   6 1122.92    7.22
   1  -3  -6 1143.54    6.66
   1  -3  -6 1132.58    6.05
   5  -1   3    5.50    0.41
  -5   1  -3    5.34    0.71
   5   1   3    6.40    0.58
   5  -1   3    5.26    0.47
   5   1   3    5.34    0.42
  -5  -1  -3    5.12    0.62
   5  -1   3    8.89    0.55
   5  -1   3    9.13    0.60
   5   1   3    5.62    0.49
   2   0  -8   91.63    1.40
   2   0  -8   95.30    1.50
   2   0  -8   94.95    1.69
   0   4   4  645.46    3.89
   0  -4  -4  643.98    3.51
   0   4   4  659.42    5.78
   0  -4   4  645.81    3.70
   0  -4  -4  657.10    4.37
   5  -3  -5  412.32    2.58
   5   3  -5  413.08    3.36
   5  -3  -5  407.94    3.13
   5  -3  -5  416.52    4.12
   5   3  -5  404.91    3.85
   5   3  -5  417.06    2.98
   5   3  -5  408.49    3.42
   5   3  -5  410.65    2.77
   5  -3  -5  401.59    3.36
   5   3  -5  403.40    3.51
  -5   3   5  398.17    3.38
   4   4  -2 2518.78   10.26
  -4   4   2 2541.60   10.13
   4   4  -2 2475.40    9.99
  -4   4   2 2469.66    9.67
   4   4  -2 2518.30    9.10
   4  -4  -2 2571.19    9.37
   4  -4  -2 2498.71    8.80
   3   4  -4   46.87    1.04
   3   4  -4   46.94    1.20
   3  -4  -4   51.55    0.95
  -3  -4   4   49.65    1.23
   3  -4  -4   46.39    1.30
   3   4  -4   48.67    1.01
  -3   4   4   43.49    1.18
  -3   4   4   47.76    1.46
   3  -4  -4   48.86    1.17
   4   0  -8   11.32    0.60
   4   0  -8   12.34    0.56
   4   0  -8   10.39    0.77
   4   0  -8   11.50    0.69
   4   0  -8   10.40    0.70
   4   0  -8   10.66    0.67
   6   0  -7    0.25    0.33
   6   0  -7    0.06    0.55
   6   0  -7    0.11    0.37
   6   0  -7    0.03    0.45
   6   0  -7    0.18    0.47
   6   0  -7    0.40    0.57
   6   0  -7    0.67    0.20
   4  -4  -1 1445.47    6.49
  -4   4   1 1472.91    7.12
   4   4  -1 1465.80    7.19
  -4   4   1 1443.52    6.88
   4   4  -1 1445.09    7.65
   4   4  -1 1466.68    8.22
   4   4  -1 1426.79    7.43
   4  -4  -1 1473.88    6.08
   7   1  -5    2.97    0.47
   7  -1  -5    3.17    0.49
   7   1  -5    3.19    0.61
   7  -1  -5    3.97    0.53
   7   1  -5    2.84    0.54
   7  -1  -5    3.19    0.54
   7   1  -5    3.25    0.66
   7  -1  -5    3.27    0.72
   7   1  -5    3.52    0.54
   7  -1  -5    3.01    0.49
   7  -1  -5    5.09    0.41
   7   1  -5    2.95    0.42
   7  -1  -5    4.30    0.64
   4   3  -6  542.31    4.01
  -4  -3   6  538.04    3.62
   4   3  -6  544.38    3.35
  -4   3   6  539.48    4.03
   4   3  -6  540.47    3.16
   4   3  -6  550.97    3.85
   4  -3  -6  558.75    4.07
   4  -3  -6  552.55    3.96
   4   3  -6  544.15    3.13
   4  -3  -6  557.06    4.72
   4  -3  -6  558.55    2.65
   4   3  -6  541.19    4.28
   4  -3  -6  539.40    3.60
   7  -1  -1  493.56    2.78
   7  -1  -1  480.15    3.93
   7   1  -1  481.82    4.07
   7   1  -1  430.29    3.70
   7   1  -1  488.33    3.07
  -7   1   1  451.92    2.98
   7   1  -1  481.67    3.72
   7   1  -1  505.92    3.69
   7  -1  -1  495.77    3.30
   7   1  -1  476.74    3.43
   3   1  -8   57.23    1.06
   3   1  -8   58.51    1.37
   3  -1  -8   59.66    1.52
   3   1  -8   61.18    1.38
   3   1  -8   64.05    1.40
   3  -1  -8   60.65    1.36
   3   1  -8   63.29    1.28
   3  -1  -8   57.09    1.40
   3  -1  -8   58.40    1.53
   3  -1  -8   59.54    1.19
  -1   0  -7    0.20    0.47
  -1   0  -7    0.08    0.59
  -1   0  -7    0.87    0.41
   1   0   7    0.03    0.30
  -1   0  -7    0.03    0.50
   1   0   7    0.28    0.40
   4  -4  -3 1529.71    6.12
   4   4  -3 1519.84    7.65
   4  -4  -3 1566.42    7.06
   4   4  -3 1545.76    7.79
  -4   4   3 1569.12    7.79
   4   4  -3 1545.53    6.64
  -4   4   3 1553.69    7.28
   4  -4  -3 1556.25    6.64
   4   4  -3 1552.04    7.53
  -5   3  -1  287.53    2.63
  -5   3  -1  283.00    2.62
   5  -3   1  299.22    2.53
   5   3   1  280.82    2.73
   5   3   1  287.09    3.54
   5   3   1  298.46    2.88
   5   3   1  272.30    2.98
   2   1  -8 1117.07    5.45
   2   1  -8 1056.47    6.11
   2  -1  -8 1072.72    6.48
   2  -1  -8 1007.55    6.16
   2   1  -8 1072.52    5.82
   2  -1  -8 1074.22    6.12
   2  -1  -8 1021.11    6.22
   2   1  -8 1030.16    4.85
   2   1  -8 1052.86    6.24
   6   2  -6  778.88    4.46
   6   2  -6  809.81    4.58
   6  -2  -6  754.79    4.55
   6  -2  -6  805.01    3.68
   6   2  -6  734.25    5.46
   6  -2  -6  793.64    5.07
   6  -2  -6  801.97    4.90
   6  -2  -6  791.69    6.15
  -6   2   6  796.93    4.82
   6  -2  -6  815.96    4.91
   6   2  -6  782.87    5.27
   6   2  -6  822.22    4.07
   6   2  -6  794.96    5.09
   4  -1  -8 1788.74    6.97
   4   1  -8 1879.35    7.50
   4   1  -8 1721.41    6.35
   4   1  -8 1777.15    8.34
   4   1  -8 1788.13    7.56
   4  -1  -8 1815.10    8.39
   4  -1  -8 1813.18    9.09
   4   1  -8 1832.15    7.75
   4  -1  -8 1778.79    7.32
  -6   0  -2   26.73    1.06
   6   0   2   25.31    0.77
   6   0   2   25.49    0.75
   6   0   2   25.26    0.91
   6   0   2   28.20    0.96
   0   3  -6 1239.77    5.56
   0   3   6 1235.07    5.73
   0   3  -6 1248.69    5.96
   0  -3  -6 1175.27    6.65
   0  -3  -6 1269.65    6.63
   0   3  -6 1219.70    6.94
   0   3   6 1196.63    7.75
   0   3  -6 1222.11    5.43
   6   1  -7  424.96    3.88
   6  -1  -7  422.51    3.35
   6   1  -7  428.93    3.42
   6  -1  -7  438.57    3.89
   6   1  -7  420.39    3.80
   6  -1  -7  425.98    3.34
   6   1  -7  443.57    2.88
   6  -1  -7  422.46    4.39
   6   1  -7  427.00    3.12
   6  -1  -7  419.43    3.33
   6  -1  -7  426.33    3.56
   6   1  -7  425.27    3.99
   2   4   3   55.23    1.18
  -2   4  -3   55.84    1.12
  -2  -4  -3   58.60    1.25
  -2   4  -3   54.24    1.14
  -2   4  -3   53.64    1.13
  -2   4  -3   53.37    1.30
  -2   4  -3   54.56    1.26
   7   0  -6 3346.48   13.54
   7   0  -6 3345.30   12.30
   7   0  -6 3347.68   10.45
   4   4   0   70.59    1.59
   4   4   0   75.62    1.42
  -4   4   0   71.45    1.46
  -4   4   0   74.65    1.49
   4  -4   0   71.22    1.24
   4   4   0   75.99    1.80
   4   4   0   71.33    1.25
   4   4   0   71.61    1.92
   4   4   0   73.74    1.53
  -4   4   0   74.42    1.18
   5  -2  -7   10.54    0.65
   5  -2  -7    9.77    0.61
   5  -2  -7   11.36    0.91
   5  -2  -7   10.87    0.63
   5   2  -7   10.03    0.58
   5   2  -7   11.11    0.65
   5   2  -7    9.99    0.77
   5   2  -7    9.82    0.48
   5   2  -7   10.45    0.67
   5   2  -7    9.47    0.75
   5  -2  -7    9.77    0.69
   1   0  -8   77.48    1.57
   1   0  -8   80.52    1.39
   1   0  -8   78.98    1.77
   6   3  -3   18.27    0.89
   6   3  -3   18.39    0.84
   6   3  -3   17.76    0.71
   6  -3  -3   19.18    0.83
   6  -3  -3   16.82    0.95
   6  -3  -3   19.59    0.76
  -6   3   3   17.68    0.79
   6   3  -3   17.27    0.70
   6  -3  -3   19.46    0.68
   6   3  -2  115.96    1.99
   6   3  -2  121.73    1.96
   6  -3  -2  115.11    1.59
   6  -3  -2  113.99    1.81
  -6   3   2  116.18    1.75
   6  -3  -2  108.30    1.54
   6   3  -2  113.89    1.85
  -6   3   2  116.09    1.67
   6   3  -2  112.17    1.68
   6   3  -2  108.82    2.09
   6   3  -2  115.97    1.64
   6  -3  -2  113.36    2.00
   3   2   5  565.87    4.92
  -3   2  -5  555.00    3.48
  -3   2  -5  546.23    4.88
  -3   2  -5  548.51    3.30
  -3  -2  -5  561.06    4.51
   3   2   5  546.56    3.59
  -3   2  -5  551.01    3.61
   0  -2  -7  847.75    5.84
   0   2  -7  854.16    6.04
   0   2   7  858.36    6.03
   0   2  -7  867.49    4.48
   0  -2  -7  859.47    5.44
  -1  -1  -7  777.29    5.64
   1  -1   7  779.64    4.00
   1   1   7  771.83    3.88
  -1  -1  -7  782.91    4.91
  -1  -1  -7  787.58    5.77
  -1   1  -7  791.12    4.17
  -1   1  -7  772.81    5.38
   1   1   7  760.85    5.26
  -1   1  -7  796.44    4.30
   7   0   0   12.04    0.74
   7   0   0   12.71    0.55
   7   0   0   11.46    0.60
  -7   0   0   13.79    0.79
   7   0   0   14.27    0.70
  -4   2  -4  453.48    3.28
   4  -2   4  447.56    2.84
   4   2   4  451.55    3.56
   4   2   4  448.83    3.27
  -3   4  -2  202.83    2.08
   3   4   2  194.12    2.21
  -3   4  -2  191.76    2.19
   3   4   2  197.89    2.36
  -3   4  -2  198.48    2.01
   3   4   2  198.09    3.26
  -3   4  -2  191.18    2.44
  -3   4  -2  187.80    2.27
   3   4   2  184.53    2.47
   5   0  -8 2641.34    9.39
   5   0  -8 2628.61    9.79
   5   0  -8 2634.69    9.55
   5   0  -8 2656.07   11.49
   7   2  -3 2713.27   10.74
   7  -2  -3 2603.16   11.53
   7   2  -3 2704.01   10.38
   7   2  -3 2646.72   10.64
   7   2  -3 2745.41   11.56
   7  -2  -3 2631.50    9.39
   7  -2  -3 2777.53   10.43
   7   2  -3 2702.76    9.02
   7  -2  -3 2655.30    9.72
   6   2   1   97.21    2.06
   6   2   1   93.72    1.50
   6   2   1   91.67    1.67
   6  -2   1   94.61    1.44
  -6   2  -1   91.40    1.47
   6  -2   1   91.56    1.27
   6   2   1   91.79    1.88
   6   2   1   92.51    1.54
   3   3   4  337.43    4.05
  -3   3  -4  337.22    2.83
  -3   3  -4  319.74    3.50
  -3  -3  -4  313.93    3.17
  -3   3  -4  317.51    2.81
   3  -3   4  302.62    2.33
   3   3   4  318.04    2.77
  -3   3  -4  323.07    2.74
  -3   3  -4  314.23    2.54
  -1   4  -4 1958.44    7.57
   1  -4   4 2033.96    7.41
  -1   4  -4 1994.07    7.60
   1   4   4 1983.62    7.64
  -1   4  -4 1970.12    8.20
  -1  -4  -4 2022.62    8.72
   1   4   4 2002.69   11.03
  -1  -4  -4 1935.32    7.28
  -1   4  -4 2015.28    7.66
  -2   4   5   58.22    1.75
   2   4  -5   60.67    1.23
   2   4  -5   60.57    1.21
  -2   4   5   58.77    1.33
   2  -4  -5   57.43    1.31
   2   4  -5   58.13    1.13
  -2  -4   5   58.70    1.14
   2  -4  -5   59.97    1.55
   2  -4  -5   60.79    0.95
   2  -4  -5   58.09    1.26
   7   2  -4   10.85    0.61
   7   2  -4   10.92    0.67
   7   2  -4   11.49    0.80
   7  -2  -4   12.29    0.57
   7  -2  -4   11.75    0.92
   7  -2  -4   11.00    0.76
   7   2  -4   11.80    0.79
  -7   2   4   12.42    0.66
   7  -2  -4   11.71    0.65
   7   2  -4   12.77    0.88
   7   2  -4   11.14    0.70
   6   3  -4   23.58    1.06
  -6   3   4   22.87    0.90
   6   3  -4   23.38    0.75
   6  -3  -4   26.04    0.90
   6   3  -4   23.62    0.92
   6  -3  -4   24.07    0.73
   6   3  -4   22.20    0.92
   6  -3  -4   23.54    1.13
   6  -3  -4   23.77    0.94
   4   4  -4   95.93    1.81
   4   4  -4   94.80    1.79
   4   4  -4   91.88    1.47
   4  -4  -4   95.90    1.68
   4  -4  -4   88.07    1.49
   4  -4  -4   90.30    1.27
   4   4  -4   91.50    1.28
  -4   4   4   94.52    1.85
  -4   4   4   90.12    1.70
   4  -4  -4   88.55    1.85
   4   4  -4   89.05    1.70
   6   1   2  311.44    2.62
  -6   1  -2  293.45    3.40
   6  -1   2  292.55    2.48
   6  -1   2  304.10    2.84
   6   1   2  305.34    2.96
   6  -1   2  299.96    2.82
   6  -1   2  309.42    2.46
   6   1   2  313.87    3.29
   6   1   2  301.58    2.62
   7  -2  -2   43.49    1.03
  -7   2   2   41.83    0.95
   7   2  -2   44.27    1.38
   7   2  -2   41.42    1.26
   7   2  -2   43.54    0.99
   7  -2  -2   43.78    1.33
   7   2  -2   43.56    1.25
   7   2  -2   42.21    1.17
   7   2  -2   43.36    1.15
  -2  -3  -5  103.27    1.87
  -2  -3  -5  110.72    1.96
  -2   3  -5  105.80    1.48
   2   3   5  108.44    1.56
  -2   3  -5  109.53    1.59
  -2   3  -5  101.46    1.50
  -2   3  -5  107.17    2.09
   2   3   5  106.61    2.35
  -2   3  -5  105.56    1.67
   7  -1  -6   39.48    1.15
   7   1  -6   40.44    1.38
   7   1  -6   43.57    1.02
  -7   1   6   42.24    1.08
   7  -1  -6   41.16    1.29
   7  -1  -6   42.60    1.16
   7   1  -6   41.04    1.16
   7  -1  -6   43.37    1.12
   7   1  -6   41.25    1.31
   7   1  -6   41.61    1.08
   7   1  -6   41.33    1.29
   7  -1  -6   42.17    1.21
   7  -1  -6   42.63    0.87
   4   3   3  271.49    2.64
   4   3   3  271.99    2.81
   4   3   3  270.69    2.57
  -4   3  -3  272.60    2.58
   4   3   3  265.72    2.74
   4   3   3  257.78    3.53
   4  -3   3  283.24    2.37
  -4   3  -3  276.24    3.25
   1   1  -8   22.15    1.06
   1  -1  -8   22.30    0.99
   1  -1  -8   21.25    1.04
   1   1  -8   20.16    0.80
   1   1  -8   23.65    0.84
   1   1  -8   24.18    1.02
   1  -1  -8   22.48    1.03
   1  -1  -8   19.48    0.89
   1  -4  -5    1.85    0.59
   1  -4  -5    1.61    0.47
   1   4  -5    1.06    0.47
   1  -4  -5    1.43    0.24
  -1  -4   5    1.29    0.28
  -1   4   5    1.42    0.71
  -1   4   5    2.22    0.46
   1   4  -5    1.48    0.41
   0   5   0   -0.17    0.43
   0   5   0   -0.04    0.57
   0   5   0    0.45    0.39
   6   3  -1 1259.39    7.45
   6   3  -1 1294.00    6.11
  -6   3   1 1261.58    6.05
  -6   3   1 1330.73    6.35
   6   3  -1 1328.28    7.49
   6   3  -1 1280.52    6.65
   6  -3  -1 1292.42    5.86
   6  -3  -1 1266.71    6.31
   6   3  -1 1319.11    7.14
   6   3  -1 1283.12    6.28
  -2   2  -6  135.18    2.48
  -2  -2  -6  141.41    2.33
  -2  -2  -6  137.44    2.14
  -2   2  -6  135.77    2.05
  -2   2  -6  133.63    1.67
   2   2   6  136.16    2.41
   2   2   6  138.82    1.71
  -2   2  -6  138.23    1.75
   2  -2   6  135.41    1.78
  -2  -2  -6  139.61    2.22
   7  -1   0  217.88    2.31
   7   1   0  214.41    2.32
   7   1   0  216.49    2.56
   7  -1   0  218.58    2.59
   7   1   0  217.79    2.83
   7  -1   0  216.26    1.92
   7   1   0  214.04    2.11
   7   1   0  218.19    2.56
   5  -1  -8 2790.91    9.75
   5   1  -8 2823.54    9.95
   5   1  -8 2792.97   11.38
   5   1  -8 2788.21    9.96
   5   1  -8 2817.79   10.38
   5   1  -8 2828.92    9.78
   5  -1  -8 2811.56   12.30
   5  -1  -8 2782.99    9.88
   5  -1  -8 2740.54   10.02
   5   1  -8 2775.01   11.63
   5  -1  -8 2739.74   11.34
   3   4  -5   85.43    1.38
   3  -4  -5   82.29    1.82
  -3   4   5   84.01    1.94
   3  -4  -5   79.60    1.07
  -3   4   5   83.50    1.62
   3  -4  -5   88.88    1.61
  -3  -4   5   86.91    1.47
   3   4  -5   83.71    1.36
   3   4  -5   86.62    1.57
   3   4  -5   84.97    1.38
   5   3  -6  143.66    1.64
   5   3  -6  143.23    1.98
   5   3  -6  144.61    2.15
   5  -3  -6  139.42    2.02
   5  -3  -6  133.91    2.48
   5   3  -6  138.40    1.55
  -5   3   6  139.41    2.08
   5   3  -6  141.40    1.85
   5  -3  -6  139.35    1.91
   5   3  -6  140.41    2.34
   5   3  -6  133.83    1.46
   5  -3  -6  144.89    1.42
   5   3  -6  138.52    2.08
  -4   0  -5    0.01    0.65
   4   0   5    0.05    0.40
   4   0   5    0.41    0.49
   4   0   5    0.00    0.40
  -4   0  -5    0.47    0.48
   0   5   1  122.32    1.78
   0   5  -1  122.28    1.71
   0  -5   1  121.79    1.78
   0  -5  -1  124.16    1.77
   0   5   1  124.46    1.70
   0   5   1  117.97    2.44
   0   5  -1  122.77    1.84
   0   5  -1  120.56    2.12
   5  -2   3  726.71    3.99
  -5   2  -3  731.58    4.40
  -5   2  -3  719.73    5.49
   5   2   3  711.11    4.67
   5   2   3  727.41    4.30
   5   2   3  687.83    4.20
   5   2   3  701.17    5.57
  -1   5   0 1312.90    7.48
  -1   5   0 1311.65    6.53
   1   5   0 1307.31    6.00
  -1   5   0 1315.40    5.94
   1   5   0 1310.25    8.14
   1   5   0 1292.11    6.19
   1  -5  -1  140.19    1.83
   1   5  -1  138.58    2.16
   1   5  -1  145.94    2.42
   1  -5  -1  143.55    1.84
   1   5  -1  146.57    1.91
   1   5  -1  141.21    1.83
  -1   5   1  148.72    2.07
  -1   5   1  139.53    1.73
  -1  -5   1  152.03    2.02
   3   0   6 2285.54    9.68
   3   0   6 2311.72    8.21
  -3   0  -6 2261.33    8.61
  -3   0  -6 2147.91    8.35
  -3   0  -6 2202.50   10.96
   4   4   1   10.74    0.60
   4   4   1    9.88    0.75
   4   4   1    9.94    1.02
  -4   4  -1   10.92    0.59
  -4   4  -1   11.17    0.65
   4   4   1    9.62    0.85
   4   4   1   11.54    0.71
   4  -4   1   10.36    0.57
  -4   4  -1   10.20    0.70
   7  -2  -5  476.24    4.76
   7   2  -5  485.45    3.73
   7   2  -5  493.38    4.68
   7  -2  -5  490.67    4.26
  -7   2   5  494.98    3.69
   7  -2  -5  472.67    3.75
   7   2  -5  483.55    3.87
   7   2  -5  508.77    3.45
   7   2  -5  463.49    4.02
   7  -2  -5  482.60    3.13
   3   3  -7  199.47    2.59
   3   3  -7  216.00    1.93
   3   3  -7  208.75    2.08
  -3   3   7  221.17    2.62
   3  -3  -7  209.27    2.56
   3  -3  -7  222.31    2.56
   3   3  -7  215.62    2.28
   3  -3  -7  222.71    2.34
   3  -3  -7  215.31    3.04
   3  -3  -7  210.80    2.21
   3  -3  -7  219.50    2.43
   7   2  -1  294.47    3.15
   7  -2  -1  299.97    3.15
   7  -2  -1  302.46    2.74
   7   2  -1  302.97    2.97
   7   2  -1  310.12    3.23
   7   2  -1  302.72    2.63
  -7   2   1  296.75    2.59
   7   2  -1  308.32    3.49
   7   2  -1  305.07    3.04
  -2   3   7  596.30    5.21
   2  -3  -7  625.40    5.20
   2  -3  -7  612.19    3.79
   2  -3  -7  609.01    4.15
   2   3  -7  608.45    3.51
   2  -3  -7  592.37    4.52
   2  -3  -7  598.67    4.58
   2  -3  -7  620.37    4.04
  -2   3   7  611.09    4.34
   2   3  -7  608.70    3.79
   5   0   4  174.44    2.42
   5   0   4  169.81    2.17
   5   0   4  168.62    1.94
   3  -2  -8   20.32    0.95
   3   2  -8   23.71    0.79
   3  -2  -8   23.93    0.96
   3   2  -8   21.23    0.73
   3   2  -8   21.38    0.91
   3   2  -8   21.37    0.87
   3  -2  -8   21.53    0.78
   3  -2  -8   26.11    0.85
   3  -2  -8   23.88    1.03
   6  -3  -5  162.24    2.27
   6   3  -5  167.34    2.26
   6   3  -5  163.70    2.61
   6   3  -5  155.95    1.84
   6  -3  -5  155.20    2.73
   6  -3  -5  168.72    2.21
   6  -3  -5  162.38    1.73
   6   3  -5  163.75    2.42
   6   3  -5  163.32    1.78
   6   3  -5  158.22    2.27
  -6   3   5  156.89    2.18
  -1   5  -1  415.82    3.85
   1   5   1  415.98    3.12
  -1   5  -1  406.57    3.06
   1   5   1  412.37    3.23
  -1   5  -1  410.85    3.49
   1   5   1  406.42    4.68
  -1  -5  -1  409.73    3.36
   0   4  -5  438.96    2.99
   0   4  -5  426.74    3.14
   0  -4  -5  424.78    3.81
   0   4  -5  441.13    3.24
   0  -4   5  431.56    2.96
   0  -4  -5  426.25    2.64
   0   4   5  431.44    3.24
   0   4   5  430.47    4.86
   0   4  -5  431.79    3.47
   0   0  -8  244.43    2.45
   0   0  -8  236.69    3.25
   0   0  -8  258.00    2.77
   0   0  -8  253.64    2.85
   0   0  -8  244.76    3.22
   0   0  -8  247.51    2.41
   5   4  -2   35.64    1.18
  -5   4   2   35.33    1.09
   5   4  -2   33.91    1.27
   5  -4  -2   34.39    1.04
   5   4  -2   33.65    1.01
  -5   4   2   34.91    1.13
   5  -4  -2   32.95    0.91
   5  -4  -2   32.72    0.90
   5   4  -2   36.23    1.25
  -4   1  -5    4.88    0.51
  -4  -1  -5    5.03    0.55
   4   1   5    4.21    0.66
   4  -1   5    4.02    0.51
   4  -1   5    4.51    0.55
  -4  -1  -5    4.66    0.74
   4   1   5    4.49    0.57
  -4   1  -5    4.26    0.80
   4   1   5    4.10    0.51
   1  -5  -2 1350.22    6.37
   1   5  -2 1352.21    7.18
  -1   5   2 1326.84    8.35
   1  -5  -2 1317.39    6.09
   1   5  -2 1369.63    6.96
  -1  -5   2 1302.99    6.42
  -1   5   2 1302.33    5.74
   1   5  -2 1304.31    6.20
  -1   5   2 1319.52    6.56
   1   5  -2 1331.33    6.28
  -1   3  -6   56.79    1.60
  -1  -3  -6   56.20    1.49
  -1  -3  -6   61.24    1.49
  -1   3  -6   59.81    1.10
   1   3   6   58.18    1.83
  -1   3  -6   60.82    1.23
  -1   3  -6   59.56    1.28
  -1   3  -6   57.50    1.18
   2   2  -8   13.21    0.82
   2   2  -8   13.87    0.69
   2  -2  -8   13.76    0.88
   2  -2  -8   11.74    0.79
   2   2  -8   13.69    0.74
   2   2  -8   15.69    0.75
   2  -2  -8   13.38    0.99
   2  -2  -8   12.52    0.62
   2  -2  -8   13.16    0.80
   2   2  -8   12.23    0.72
   5   3   2  297.17    2.91
  -5   3  -2  297.17    2.70
  -5   3  -2  303.02    2.81
   5  -3   2  284.16    2.52
   5   3   2  303.04    3.87
   5   3   2  285.89    2.79
   5   3   2  295.23    3.08
  -5   3  -2  301.83    3.43
   5   3   2  289.35    2.83
   5  -4  -3  181.45    2.32
  -5   4   3  179.44    2.39
   5   4  -3  175.48    2.63
   5  -4  -3  183.13    1.95
   5  -4  -3  179.65    2.09
   5   4  -3  184.26    2.67
   5   4  -3  181.73    2.16
  -5   4   3  181.22    2.38
   5   4  -3  176.78    2.16
   0  -5   2   89.87    1.49
   0   5   2   91.45    1.48
   0   5  -2   92.25    1.52
   0   5  -2   93.57    1.75
   0   5   2   91.99    1.57
   0   5  -2   91.67    1.62
   8   0  -3   -0.07    0.54
   8   0  -3    0.05    0.56
   8   0  -3    0.14    0.47
   8   0  -3   -0.28    0.36
   8   0  -3    0.86    0.45
   8   0  -4  716.99    4.84
   8   0  -4  725.20    5.11
   8   0  -4  707.86    4.26
   8   0  -4  717.47    5.32
   2  -5  -1  565.92    3.84
  -2   5   1  571.05    4.82
   2   5  -1  585.37    4.61
   2   5  -1  563.57    4.96
   2   5  -1  561.67    3.96
  -2   5   1  584.71    4.37
  -2   5   1  565.71    3.48
  -2  -5   1  579.12    4.25
   2   5  -1  568.27    3.61
   7   0  -7    0.39    0.43
   7   0  -7    1.95    0.30
   7   0  -7   -0.23    0.63
   7   0  -7    0.20    0.61
   7   0  -7    1.95    0.56
   7   0  -7    1.18    0.57
   4   2  -8  387.49    3.11
   4   2  -8  393.59    3.78
   4  -2  -8  392.32    3.76
   4  -2  -8  373.95    3.26
   4   2  -8  390.58    3.15
   4  -2  -8  393.80    3.19
   4  -2  -8  395.73    3.11
   4   2  -8  377.46    2.71
  -3   1  -6    3.87    0.52
  -3  -1  -6    4.30    0.66
   3  -1   6    4.70    0.58
  -3   1  -6    3.46    0.77
   3  -1   6    3.53    0.46
   3   1   6    4.92    0.69
  -3  -1  -6    4.70    0.56
   3   1   6    3.46    0.48
  -3  -1  -6    3.99    0.73
   6   3   0   77.37    1.51
   6   3   0   75.69    1.61
   6   3   0   80.06    1.76
   6  -3   0   76.05    1.36
   6   3   0   79.41    1.91
  -6   3   0   76.00    1.43
   6   3   0   79.61    1.48
  -6   3   0   77.45    1.41
   6   3   0   78.04    1.95
   6   2  -7  158.60    2.25
  -6   2   7  157.84    2.24
   6   2  -7  157.81    1.91
   6   2  -7  153.50    2.54
   6  -2  -7  157.17    2.84
   6  -2  -7  155.32    2.04
   6  -2  -7  161.95    2.37
   6   2  -7  156.36    2.09
   6  -2  -7  160.15    2.19
   6  -2  -7  161.03    2.17
   6   2  -7  159.73    1.84
   6   0  -8    8.18    0.87
   6   0  -8    6.35    0.72
   6   0  -8    7.23    0.58
   6   0  -8    7.10    0.68
   6   0  -8    7.43    0.80
   5   4  -1   -0.03    0.50
   5   4  -1    0.44    0.34
   5   4  -1    0.30    0.56
   5   4  -1    0.48    0.46
  -5   4   1    0.16    0.50
   5  -4  -1    0.37    0.42
   5   4  -1   -0.01    0.59
   5   4  -1    0.23    0.61
  -5   4   1    0.58    0.43
  -2  -5   0   96.45    1.74
   2   5   0   99.40    2.30
   2   5   0   97.87    1.65
  -2   5   0  100.04    1.48
   4  -3  -7    1.66    0.45
   4  -3  -7    1.36    0.53
   4   3  -7    1.50    0.54
   4   3  -7    2.00    0.47
   4  -3  -7    1.75    0.72
   4   3  -7    1.59    0.56
   4   3  -7    1.95    0.33
   4   4  -5  365.63    3.56
   4  -4  -5  363.24    3.91
   4   4  -5  369.16    3.16
   4   4  -5  366.96    2.89
   4   4  -5  377.01    2.95
  -4   4   5  357.30    3.67
  -4  -4   5  359.87    3.37
   4  -4  -5  365.15    3.14
   4   4  -5  358.71    2.74
   4   4  -5  358.55    2.76
   4   4  -5  366.48    3.54
   4  -4  -5  367.89    2.52
   7   0   1   -0.14    0.47
  -7   0  -1    0.06    0.50
   7   0   1    0.06    0.45
   7   0   1    0.81    0.37
   7   0   1    0.05    0.37
  -5   1  -4  691.83    5.63
   5  -1   4  677.28    4.58
   5   1   4  672.51    4.54
   5   1   4  687.37    5.25
  -5  -1  -4  682.60    5.33
   5  -1   4  672.78    3.69
   5   1   4  680.80    4.10
  -1   3   7  972.68    5.46
   1   3  -7  963.72    6.03
  -1   3   7  962.17    7.00
   1  -3  -7  998.37    4.90
   1  -3  -7  945.89    6.10
   1  -3  -7  966.39    6.58
   1   3  -7  963.33    5.36
   1  -3  -7  994.49    6.03
   2   5  -2   60.89    1.21
  -2   5   2   62.04    1.75
   2   5  -2   60.54    1.34
   2  -5  -2   62.50    1.33
  -2   5   2   60.98    1.11
  -2   5   2   60.38    1.41
   2   5  -2   63.62    1.55
  -2  -5   2   61.85    1.38
   2  -5  -2   57.82    1.15
   2   5  -2   59.53    1.47
  -1   2  -7  744.08    5.97
  -1   2  -7  733.18    4.38
  -1   2  -7  733.31    4.22
  -1   2  -7  740.63    5.15
  -1  -2  -7  701.43    5.55
  -1  -2  -7  708.43    5.19
   1   2   7  715.01    5.77
  -1  -2  -7  752.72    5.18
   2   0   7    0.25    0.40
   2   0   7   -0.42    0.52
  -2   0  -7    0.32    0.52
  -2   0  -7    0.13    0.56
  -2   0  -7    0.57    0.68
  -2   0  -7    0.10    0.37
   0   1  -8  101.41    1.65
   0  -1  -8  108.31    1.89
   0  -1  -8   92.68    2.05
   0   1  -8   93.54    2.16
   0   1  -8   98.18    1.52
   0  -1   8   95.77    1.31
   0   1  -8  104.27    2.06
   0   1  -8  104.90    1.62
   0  -1  -8  101.18    2.09
  -3   4  -3    0.97    0.38
  -3   4  -3    0.90    0.41
  -3   4  -3    0.86    0.41
   3  -4   3    0.96    0.34
  -3   4  -3    2.40    0.56
   3   4   3    1.32    0.41
  -3   4  -3    0.99    0.50
   3   4   3    0.94    0.53
   3   4   3    0.62    0.46
   2   4   4  100.27    2.50
  -2   4  -4   97.96    1.58
   2  -4   4   94.13    1.38
  -2   4  -4   95.89    1.88
  -2  -4  -4   96.95    1.85
  -2   4  -4   90.08    1.64
  -2   4  -4   94.69    1.49
  -2   4  -4   95.02    1.53
   2   4   4   98.71    1.59
  -2  -4  -4   96.59    1.53
   8   0  -2   48.01    1.14
   8   0  -2   51.42    1.45
   8   0  -2   52.62    1.29
   8   0  -5    0.14    0.56
   8   0  -5    0.02    0.53
   8   0  -5    0.02    0.57
   8   0  -5    0.23    0.34
   8   0  -5    0.05    0.48
   8   1  -3  396.63    3.59
   8   1  -3  407.15    3.92
   8  -1  -3  402.64    3.44
   8   1  -3  403.41    3.79
   8   1  -3  404.33    3.73
   8  -1  -3  392.86    3.76
   8   1  -3  415.28    4.13
   8  -1  -3  410.53    4.05
   8  -1  -3  411.98    3.19
   8  -1  -4 1496.38    8.60
   8  -1  -4 1604.53    6.84
   8   1  -4 1516.79    8.08
   8  -1  -4 1588.92    7.51
   8   1  -4 1582.00    8.12
   8   1  -4 1543.18    7.23
   8  -1  -4 1570.67    7.80
   8   1  -4 1571.81    7.88
   8   1  -4 1578.53    8.57
   8   1  -4 1645.60    7.18
   7   1  -7  814.47    4.43
   7  -1  -7  807.45    5.29
   7   1  -7  805.13    5.66
   7   1  -7  827.82    5.30
  -7   1   7  803.76    4.99
   7   1  -7  787.21    5.76
   7  -1  -7  837.16    5.94
   7   1  -7  809.54    6.15
   7   1  -7  811.19    4.98
   7  -1  -7  859.41    5.31
   7  -1  -7  818.68    5.06
   5  -4  -4  343.71    3.31
   5   4  -4  337.23    3.06
   5   4  -4  360.07    3.76
   5  -4  -4  338.68    3.81
   5  -4  -4  338.89    3.02
   5  -4  -4  351.43    2.69
  -5   4   4  347.44    3.32
  -5   4   4  354.27    3.43
   5   4  -4  344.62    3.73
   5   4  -4  356.60    3.56
   5   4  -4  341.80    2.93
   6   2   2 2905.21   10.61
   6   2   2 2884.81   11.17
  -6   2  -2 2921.88   10.50
  -6   2  -2 2883.76   12.42
   6  -2   2 2895.14   10.10
   6   2   2 2907.03   12.53
   6  -1  -8  119.13    2.17
   6   1  -8  120.76    2.15
   6   1  -8  123.49    1.83
   6  -1  -8  119.84    2.50
   6  -1  -8  117.68    1.77
   6   1  -8  119.93    1.88
   6  -1  -8  121.31    1.82
   6  -1  -8  115.07    1.96
   6  -1  -8  116.47    1.88
   6   1  -8  118.61    2.14
   1   5   2  319.57    2.88
  -1   5  -2  313.33    2.81
  -1   5  -2  329.90    3.23
  -1  -5  -2  318.99    3.03
   1   5   2  322.92    2.74
  -1  -5  -2  337.03    3.02
   1  -5   2  309.57    2.78
   7   2  -6    4.28    0.57
   7  -2  -6    3.78    0.59
   7   2  -6    3.57    0.63
   7   2  -6    4.06    0.55
   7  -2  -6    3.46    0.54
   7  -2  -6    4.18    0.37
   7   2  -6    3.41    0.49
  -7   2   6    3.70    0.56
   7  -2  -6    3.53    0.83
   7  -2  -6    3.80    0.64
   7  -2  -6    3.22    0.61
   7   2  -6    2.93    0.69
   1   2  -8  152.23    2.53
   1   2  -8  158.63    2.29
   1  -2  -8  154.57    2.58
   1  -2  -8  158.49    2.33
   1  -2  -8  159.38    2.58
   6   0   3   -0.22    0.43
   6   0   3    0.12    0.29
  -6   0  -3    0.21    0.61
   6   0   3    0.33    0.46
   3   0  -9    0.26    0.51
   3   0  -9   -0.21    0.56
   3   0  -9    0.14    0.53
   3   0  -9    0.29    0.53
   3   0  -9    0.06    0.52
   3   0  -9    0.60    0.49
  -2   5  -1  145.98    1.87
   2   5   1  161.34    2.49
   2   5   1  157.45    3.00
   2   5   1  156.29    2.10
  -2   5  -1  160.68    2.33
  -2  -5  -1  162.49    2.27
   2  -5   1  146.27    1.91
   1  -5  -3  501.09    3.45
   1   5  -3  483.33    3.73
   1  -5  -3  495.61    3.84
  -1  -5   3  506.36    3.73
  -1   5   3  497.37    5.17
   1   5  -3  487.29    3.71
   1   5  -3  501.84    3.63
  -1   5   3  486.70    3.80
   7  -1   1   91.51    1.36
   7   1   1   95.78    1.89
   7   1   1   92.85    1.50
  -7   1  -1   93.57    1.98
   7  -1   1   93.64    1.69
   7  -1   1   89.01    1.47
   7  -1   1   92.53    1.69
   7   1   1   94.25    1.75
   7   1   1   89.91    1.55
   7   1   1   91.13    2.13
  -2  -1  -7   30.44    1.07
  -2   1  -7   30.96    1.19
  -2   1  -7   31.00    1.42
  -2  -1  -7   31.19    1.31
   2   1   7   30.63    1.24
  -2   1  -7   28.76    0.93
   2  -1   7   31.13    0.87
   2   1   7   31.84    0.87
   2  -1   7   32.97    1.07
  -2  -1  -7   30.11    1.24
  -7   2   0   41.14    1.04
   7   2   0   38.66    1.21
   7   2   0   45.42    1.51
   7   2   0   43.10    1.19
   7  -2   0   42.34    1.19
   7  -2   0   43.19    1.07
   7   2   0   42.71    1.25
   7   2   0   48.40    1.16
   7  -2   0   43.81    0.90
   7   2   0   42.26    1.36
   4   0  -9    0.20    0.47
   4   0  -9    0.48    0.50
   4   0  -9   -0.09    0.54
   4   0  -9   -0.25    0.51
   4   0  -9    0.21    0.51
   4   0  -9   -0.08    0.42
   5   2  -8  141.58    2.07
   5   2  -8  144.71    2.40
   5   2  -8  145.67    1.93
   5  -2  -8  147.05    2.03
   5   2  -8  147.50    1.60
   5  -2  -8  145.96    1.96
   5  -2  -8  147.39    1.95
   5   2  -8  147.17    2.01
   5  -2  -8  145.57    2.32
   5   4   0   87.14    1.49
   5   4   0   91.70    1.90
  -5   4   0   87.31    1.67
   5  -4   0   90.80    1.47
  -5   4   0   90.04    1.60
  -5   4   0   92.46    1.46
   5   4   0   88.02    2.20
   5   4   0   89.23    1.80
  -4   4  -2   38.57    0.94
   4  -4   2   36.19    0.94
  -4   4  -2   38.28    1.29
  -4   4  -2   37.45    1.04
   4   4   2   38.32    1.15
   4   4   2   37.63    1.14
  -4   4  -2   38.00    1.13
   4   4   2   42.37    1.30
   4   4   2   39.37    1.68
   2  -4  -6  384.33    4.08
   2  -4  -6  383.21    3.16
  -2   4   6  364.62    4.32
   2   4  -6  388.24    3.03
   2   4  -6  376.97    2.96
   2  -4  -6  378.28    3.45
   2  -4  -6  361.87    2.96
   2   4  -6  378.58    3.18
  -2   4   6  366.73    3.37
   8   1  -2   58.19    1.57
   8   1  -2   57.66    1.57
   8   1  -2   59.92    1.11
   8   1  -2   61.95    1.35
   8  -1  -2   58.77    1.32
   8   1  -2   60.81    1.47
   8  -1  -2   61.48    1.57
   8  -1  -2   58.45    1.17
   8   1  -5  427.56    3.55
   8   1  -5  392.92    3.85
   8  -1  -5  405.46    3.70
   8  -1  -5  404.51    3.11
   8  -1  -5  386.94    3.79
   8   1  -5  406.52    3.94
   8   1  -5  400.72    4.20
   8   1  -5  447.48    3.65
   8   1  -5  417.15    3.80
   8  -1  -5  414.97    4.40
   8  -1  -5  401.39    3.56
   2   5  -3  968.84    5.57
  -2   5   3  970.99    5.75
  -2   5   3  973.69    7.00
  -2  -5   3  965.62    5.52
   2   5  -3  968.17    5.18
  -1   4  -5   36.44    0.92
  -1   4  -5   35.88    1.21
  -1  -4  -5   34.82    1.19
   1   4   5   37.92    0.99
  -1   4  -5   39.41    1.07
  -1   4  -5   35.02    1.10
   1   4   5   36.54    1.64
   1  -4   5   34.12    0.85
   6  -3  -6    5.40    0.58
   6   3  -6    4.05    0.64
   6  -3  -6    4.31    0.82
   6   3  -6    5.17    0.67
   6  -3  -6    6.50    0.43
   6   3  -6    4.38    0.55
  -6   3   6    4.86    0.66
   6  -3  -6    4.10    0.65
   6   3  -6    4.32    0.54
   0  -5  -3  320.64    2.82
   0   5   3  313.87    2.70
   0   5   3  316.38    4.30
   0   5   3  307.07    2.82
   0   5  -3  317.96    3.09
   0   5  -3  313.58    2.98
   0   5  -3  307.12    2.82
   0  -5   3  304.53    2.81
  -3   5   1  168.54    1.85
  -3   5   1  168.73    2.48
   3   5  -1  184.28    2.69
   3   5  -1  162.75    2.51
   3  -5  -1  160.95    2.00
   3   5  -1  171.42    2.24
   3   5  -1  173.73    2.88
   3  -5  -1  172.00    2.09
  -3  -5   1  156.55    2.35
  -3   5   1  166.44    2.40
  -3   4   6  190.03    2.96
   3   4  -6  195.86    2.20
   3  -4  -6  197.73    2.31
   3  -4  -6  192.59    2.90
  -3   4   6  191.23    2.50
   3  -4  -6  187.72    2.37
   3   4  -6  197.77    2.14
  -3  -4   6  193.89    2.14
   3   4  -6  195.59    2.36
   3   4  -6  199.31    2.10
   2   0  -9   -0.25    0.51
   2   0  -9   -0.03    0.56
   2   0  -9   -0.33    0.50
   2   0  -9    0.03    0.49
   2   0  -9   -0.23    0.50
   5   3  -7  750.66    4.95
   5   3  -7  757.60    4.34
   5   3  -7  747.96    5.32
   5   3  -7  770.89    4.85
   5  -3  -7  735.37    6.17
   5   3  -7  770.12    5.67
   5  -3  -7  767.22    5.19
  -5   3   7  783.08    5.26
   5  -3  -7  774.21    5.08
   5  -3  -7  810.21    5.02
   5   3  -7  731.96    3.92
   3  -5  -2  206.53    2.43
   3  -5  -2  200.71    2.21
  -3   5   2  206.25    2.88
   3   5  -2  206.07    2.76
   3   5  -2  198.08    2.75
  -3  -5   2  207.35    2.67
  -6   1  -3  205.05    3.08
   6   1   3  217.12    2.32
   6  -1   3  207.07    2.13
   6  -1   3  209.68    2.20
   6  -1   3  212.35    2.43
   6   1   3  213.60    2.91
   6   1   3  212.31    2.58
  -6  -1  -3  207.45    2.89
   3   1  -9  211.42    2.70
   3  -1  -9  212.69    3.02
   3   1  -9  218.10    2.49
   3  -1  -9  209.70    2.31
   3   1  -9  212.87    2.70
   3   1  -9  205.83    2.13
   3  -1  -9  206.92    2.67
   3   1  -9  201.60    2.69
   8   0  -1    0.05    0.39
   8   0  -1   -0.07    0.53
   8   0  -1    0.11    0.39
   8   0  -1    0.13    0.31
   8   0  -6    0.70    0.56
   8   0  -6    0.02    0.61
   8   0  -6    0.21    0.63
   8   0  -6    0.99    0.37
   8   0  -6    0.27    0.58
   8   0  -6    0.24    0.50
  -3   3  -5   80.64    1.99
  -3  -3  -5   77.64    1.75
   3   3   5   78.13    2.15
  -3   3  -5   80.35    1.46
  -3   3  -5   78.48    1.46
   3   3   5   78.25    1.48
   1   4  -6 1179.18    5.65
  -1   4   6 1158.90    6.04
   1  -4  -6 1195.22    6.57
  -1   4   6 1141.27    8.13
   1  -4  -6 1193.85    7.34
   0   3   7 3611.55   15.54
   0   3  -7 3592.40   14.18
   0   3  -7 3706.76   11.84
   0   3  -7 3658.69   12.03
   0  -3  -7 3595.47   13.56
   0  -3  -7 3576.70   12.44
   0  -3  -7 3775.71   14.84
   0   3  -7 3672.92   12.49
   0  -3  -7 3690.64   11.45
   0   3   7 3659.25   12.08
  -4   3  -4  104.45    1.63
   4   3   4  101.89    1.69
  -4  -3  -4  102.25    1.91
   4  -3   4  103.15    1.46
  -4   3  -4  102.22    2.23
  -4   3  -4   99.97    1.64
   4  -1  -9 3264.72   13.69
   4   1  -9 3346.81   11.97
   4  -1  -9 3276.50   12.91
   4  -1  -9 3240.96   11.46
   4   1  -9 3233.84   11.98
   4   1  -9 3295.97   12.86
   4   1  -9 3255.86   10.42
   4   1  -9 3310.20   11.79
   4  -1  -9 3305.54   10.82
  -7   3   3   19.28    0.74
  -7   3   3   18.22    0.82
   7   3  -3   18.43    1.11
   7   3  -3   19.04    0.83
   7  -3  -3   19.65    1.04
   7  -3  -3   19.04    0.75
   7   3  -3   18.47    0.78
   7   3  -3   19.16    1.03
   7   3  -3   17.09    0.94
   7  -3  -3   20.74    0.82
   7  -3  -3   18.72    0.91
   6   3   1   43.10    1.32
   6   3   1   43.17    1.20
   6  -3   1   43.24    1.07
   6   3   1   43.17    1.25
  -6   3  -1   44.54    1.14
   6   3   1   44.82    1.61
   6   3   1   48.27    1.71
   4   2   5  634.98    5.62
  -4  -2  -5  612.52    5.04
   4  -2   5  644.81    4.41
  -4   2  -5  643.92    3.70
  -4  -2  -5  624.36    4.84
   4   2   5  648.03    4.18
  -3  -5   0    0.55    0.51
  -3   5   0    0.21    0.51
  -3   5   0    0.28    0.37
  -3   5   0    0.70    0.56
   3   5   0    0.42    0.73
   3   5   0    0.83    0.61
   3  -5   0    0.40    0.37
   3  -5   0    0.66    0.34
   3   5   0    1.91    0.53
   5   0  -9    0.13    0.35
   5   0  -9    1.65    0.50
   5   0  -9   -0.02    0.51
   5   0  -9   -0.13    0.59
   5   4  -5   99.63    1.54
   5  -4  -5  100.36    1.70
   5   4  -5  104.16    1.95
   5   4  -5   97.60    1.39
   5   4  -5  103.18    2.06
  -5   4   5  104.22    1.87
   5   4  -5  105.14    2.09
   5  -4  -5  107.45    1.46
   5   4  -5   99.50    1.74
  -5   4   5   99.70    1.91
   5  -4  -5  103.52    2.24
   5  -4  -5  100.88    1.85
   7   3  -4  708.24    5.13
  -7   3   4  718.14    4.74
   7   3  -4  719.96    5.06
   7  -3  -4  688.08    4.59
   7  -3  -4  689.16    5.69
   7  -3  -4  712.65    5.08
   7  -3  -4  698.25    4.25
   7   3  -4  694.32    4.45
   7   3  -4  693.17    4.09
   7   3  -4  700.83    5.34
  -1   0  -8  385.59    3.42
   1   0   8  412.34    2.89
  -1   0  -8  403.61    4.49
  -1   0  -8  441.19    3.61
  -1   0  -8  418.21    4.36
  -3   2  -6  441.79    3.20
   3   2   6  423.49    4.63
  -3  -2  -6  422.29    4.28
  -3   2  -6  439.20    4.01
  -3  -2  -6  433.86    4.15
  -3   2  -6  439.08    3.17
  -3  -2  -6  440.90    4.02
   3   2   6  436.15    3.32
   3  -2   6  435.89    3.56
   7  -3  -2   81.59    1.45
   7  -3  -2   83.75    1.82
   7   3  -2   84.39    1.60
   7  -3  -2   84.04    1.69
  -7   3   2   82.54    1.46
   7   3  -2   81.53    1.85
   7   3  -2   82.69    1.78
   7   3  -2   79.01    1.94
   7   3  -2   85.27    1.81
  -7   3   2   85.77    1.56
   7   3  -2   85.99    1.52
   2   1  -9   26.07    1.09
   2  -1  -9   26.22    1.11
   2  -1  -9   27.11    1.13
   2  -1  -9   26.04    1.19
   2   1  -9   25.86    1.02
   2   1  -9   25.04    1.14
   2   1  -9   24.27    0.91
   2   1  -9   27.85    1.01
  -3  -5   3  637.37    4.63
   3  -5  -3  597.75    3.89
   3   5  -3  608.62    3.77
   3  -5  -3  602.61    4.39
  -3   5   3  598.54    5.12
   3   5  -3  612.28    4.79
  -3   5   3  574.18    4.47
  -2   5  -2   25.35    0.98
   2   5   2   23.98    1.44
  -2  -5  -2   26.06    0.97
  -2   5  -2   24.75    1.01
  -2   5  -2   26.28    0.87
   2  -5   2   24.89    0.84
   2   5   2   25.39    0.92
   4  -4  -6    8.51    0.74
  -4   4   6    8.45    0.77
   4   4  -6    8.23    0.70
   4   4  -6    8.46    0.57
   4   4  -6    8.11    0.67
  -4  -4   6    7.77    0.54
   4   4  -6    9.52    0.57
   4  -4  -6    9.49    0.90
   4   4  -6    9.29    0.67
   4   4  -6    8.14    0.58
   2   3   6  588.43    3.89
   2   3   6  588.21    5.75
  -2   3  -6  584.98    4.08
  -2   3  -6  603.14    3.86
  -2   3  -6  605.44    3.85
  -2  -3  -6  571.41    4.95
  -2   3  -6  579.84    5.26
   8   1  -1   46.18    1.29
   8   1  -1   45.71    1.46
   8  -1  -1   44.72    1.34
   8   1  -1   45.60    1.28
   8   1  -1   45.49    1.30
   8  -1  -1   44.29    1.12
   8  -1  -1   45.52    1.13
   8   1  -1   43.92    1.18
   8  -1  -1   44.81    0.91
   8   1  -1   44.99    1.03
   8  -1  -6    1.21    0.54
   8   1  -6    1.20    0.60
   8  -1  -6    1.31    0.60
   8  -1  -6    1.22    0.61
   8  -1  -6    0.90    0.71
   8   1  -6    1.35    0.54
   8   1  -6    1.07    0.40
   8   1  -6    1.23    0.54
   8  -1  -6    0.95    0.34
   8   1  -6    1.99    0.63
   8   1  -6    2.09    0.68
  -5   2  -4 1111.21    7.59
   5  -2   4 1105.52    6.05
   5   2   4 1111.12    6.28
   5  -2   4 1129.29    5.32
  -1   5  -3  442.49    3.60
   1   5   3  431.91    3.43
  -1  -5  -3  442.64    3.45
  -1   5  -3  438.49    3.41
  -1  -5  -3  441.06    3.76
   1  -5   3  436.11    3.36
   0  -2  -8   57.95    1.47
   0  -2  -8   59.39    1.56
   0   2  -8   62.18    1.30
   0   2  -8   61.09    1.34
   0   2  -8   57.24    1.70
   0  -2  -8   60.08    1.70
   0   2  -8   59.60    1.52
   0   2   8   57.77    1.70
   7   0  -8   18.92    1.01
   7   0  -8   18.92    0.88
   7   0  -8   17.30    1.13
   7   0  -8   18.82    0.93
   7   0  -8   17.80    1.07
   5   3   3  780.70    4.94
  -5   3  -3  773.08    6.00
   5  -3   3  758.53    4.38
   5   3   3  783.92    4.85
   5   3   3  797.43    6.67
   5   1  -9  677.47    4.38
   5   1  -9  698.40    4.63
   5  -1  -9  676.07    4.49
   5  -1  -9  669.84    5.74
   5   1  -9  661.73    4.63
   5  -1  -9  677.10    5.35
   5   1  -9  653.76    5.37
   5  -1  -9  671.59    4.26
   5   1  -9  634.83    3.79
   5   4   1  315.27    4.25
  -5   4  -1  296.19    3.47
  -5   4  -1  310.10    3.02
  -5   4  -1  306.53    3.08
   5  -4   1  327.97    2.99
   5   4   1  309.28    3.33
  -5   4  -1  316.34    2.85
   5   4   1  304.67    3.01
   5   4   1  313.01    3.01
   5   4   1  305.28    3.42
   1   0  -9    0.01    0.51
   1   0  -9   -0.03    0.51
   1   0  -9    0.10    0.56
   1   0  -9    0.12    0.61
   1   0  -9   -0.09    0.49
   1  -5  -4  262.80    2.38
  -1   5   4  260.33    2.78
  -1   5   4  255.34    3.83
   1   5  -4  261.53    2.76
  -1  -5   4  252.04    2.60
   8  -2  -3   23.32    0.83
   8   2  -3   23.40    1.10
   8  -2  -3   20.95    1.09
   8   2  -3   21.35    0.96
   8   2  -3   22.06    1.04
   8   2  -3   23.15    1.14
   8  -2  -3   22.52    0.89
   8   2  -4  497.74    4.22
   8  -2  -4  496.06    3.92
   8   2  -4  497.11    4.08
   8   2  -4  497.07    4.42
   8  -2  -4  493.93    3.56
   8  -2  -4  484.59    4.83
   2   5  -4   37.60    1.15
  -2   5   4   37.40    1.54
   2  -5  -4   37.98    0.94
   2  -5  -4   38.66    1.17
  -2  -5   4   38.44    1.08
  -2   5   4   36.64    1.18
   2   5  -4   37.57    1.06
   7   2  -7  191.31    2.45
   7  -2  -7  198.21    2.59
   7  -2  -7  206.48    3.44
   7   2  -7  205.87    2.75
   7  -2  -7  195.00    2.49
   7   2  -7  204.48    2.43
   7  -2  -7  200.22    2.82
  -7   2   7  195.73    2.51
   7   2  -7  203.21    2.37
  -1  -1  -8  317.48    3.31
  -1  -1  -8  330.36    3.87
  -1  -1  -8  344.92    4.02
  -1   1  -8  322.17    2.82
   1   1   8  323.35    3.67
   1  -1   8  334.63    2.66
  -1   1  -8  339.08    3.87
  -1   1  -8  348.11    2.92
   0   4  -6  340.62    2.89
   0   4  -6  340.63    2.90
   0   4  -6  328.23    3.17
   0   4   6  329.42    4.44
   0  -4  -6  335.47    3.51
   0   4   6  322.93    2.88
   6  -2  -8  523.89    5.46
   6  -2  -8  586.01    4.31
   6   2  -8  555.38    4.26
   6  -2  -8  582.43    4.82
   6   2  -8  577.41    4.41
   6  -2  -8  579.49    4.19
  -6   2   8  598.39    4.57
   6  -2  -8  601.90    4.25
   6   2  -8  573.07    3.89
   6   2  -8  560.54    5.13
   7  -3  -5   83.34    2.12
   7   3  -5   86.87    1.79
   7   3  -5   76.03    1.80
   7  -3  -5   86.33    1.63
   7  -3  -5   95.02    1.53
   7  -3  -5   85.28    1.81
   7   3  -5   89.81    1.46
   7   3  -5   82.02    1.77
  -7   3   5   84.22    1.68
  -7   0  -2   29.39    1.23
   7   0   2   29.50    1.15
   7   0   2   29.21    0.90
   7   0   2   29.15    1.08
   3   5   1   51.19    1.55
  -3   5  -1   49.38    1.12
  -3   5  -1   50.12    1.36
   3   5   1   52.17    1.90
  -3  -5  -1   51.66    1.42
   3   5   1   50.08    1.30
   3  -5   1   50.81    1.17
   6   4  -3  339.85    3.28
   6   4  -3  343.56    3.91
   6   4  -3  348.72    3.11
   6  -4  -3  338.85    3.41
  -6   4   3  344.45    3.40
  -6   4   3  345.57    3.21
   6  -4  -3  340.58    2.95
   7   3  -1  772.25    6.06
   7   3  -1  758.48    5.82
   7   3  -1  769.82    5.05
   7   3  -1  741.13    4.69
  -7   3   1  755.44    4.73
   7  -3  -1  722.32    4.56
   7   3  -1  741.93    5.31
   7   3  -1  776.33    5.65
   6  -4  -2   13.95    0.81
  -6   4   2   12.57    0.74
   6   4  -2   14.10    0.81
   6   4  -2   15.06    0.89
   6   4  -2   12.98    0.97
   6   4  -2   13.36    1.00
   6   4  -2   13.76    0.66
  -6   4   2   14.30    0.86
   6  -4  -2   14.42    0.69
   6  -4  -2   14.24    0.71
   7  -2   1  202.57    2.04
   7   2   1  195.45    2.33
  -7   2  -1  196.55    2.32
   7   2   1  198.07    2.94
   7   2   1  197.89    2.48
   7  -2   1  194.80    2.26
  -7   2  -1  191.69    2.92
   7  -2   1  191.58    2.36
   3  -3  -8  130.55    2.55
   3  -3  -8  131.27    2.14
   3  -3  -8  137.14    2.04
  -3   3   8  139.55    2.21
   3   3  -8  131.60    1.94
   3  -3  -8  140.50    2.35
   3   3  -8  130.88    1.57
   3  -3  -8  131.69    1.83
   3   3  -8  137.68    1.82
   3  -3  -8  136.38    1.96
  -2   2  -7   17.35    0.81
  -2  -2  -7   17.01    0.92
   2   2   7   15.12    0.70
  -2   2  -7   15.26    0.71
   2  -2   7   17.31    0.80
  -2   2  -7   16.64    1.15
  -2  -2  -7   16.25    0.95
  -2  -2  -7   13.61    0.93
  -2   2  -7   15.13    0.87
   2   2   7   15.78    1.07
  -3   4  -4   31.91    1.28
  -3  -4  -4   34.88    1.05
   3   4   4   32.43    1.63
   3   4   4   33.28    1.07
  -3  -4  -4   34.19    1.26
   3  -4   4   33.08    0.88
  -3   4  -4   33.05    1.10
  -3   4  -4   31.53    1.02
  -3   4  -4   33.69    0.95
  -3   4  -4   33.31    1.00
   4   0   6   58.38    1.60
  -4   0  -6   56.27    1.81
   4   0   6   58.02    1.22
   7   1  -8  432.97    4.51
   7   1  -8  444.64    3.90
   7  -1  -8  450.58    5.04
   7  -1  -8  440.58    3.95
   7   1  -8  453.70    4.33
   7  -1  -8  441.29    3.74
   7  -1  -8  454.59    3.72
   7   1  -8  434.88    4.28
   7  -1  -8  462.11    4.51
   8   2  -2 1599.28    8.59
   8   2  -2 1667.73    8.13
   8  -2  -2 1617.30    7.34
   8  -2  -2 1643.31    8.47
   8   2  -2 1616.14    9.06
  -8   2   2 1631.37    6.98
   8   2  -2 1666.05    8.07
   8   2  -2 1682.18    7.09
   8   2  -5  714.24    4.53
   8   2  -5  647.11    5.11
   8   2  -5  631.53    4.71
   8   2  -5  629.10    5.63
   8  -2  -5  626.28    4.03
   8   2  -5  618.87    4.65
   8  -2  -5  554.03    4.57
   8  -2  -5  647.07    5.72
   8  -2  -5  630.52    4.58
   2   3  -8  248.44    2.66
   2  -3  -8  246.88    2.71
  -2   3   8  256.18    2.89
   2  -3  -8  249.40    2.69
   2  -3  -8  252.73    3.15
   2   3  -8  251.12    2.29
   2  -3  -8  246.77    3.01
   2   3  -8  250.97    2.84
   2   3  -8  255.22    2.50
   2  -3  -8  247.82    2.39
   0   5  -4 1058.16    5.60
   0   5   4 1040.86    5.26
   0  -5  -4 1065.17    6.55
   0   5   4 1067.37    8.21
   0   5   4 1035.88    5.56
   0  -5   4 1078.88    5.54
   0  -5  -4 1089.75    6.14
   0  -5  -4 1068.58    5.32
   0   5  -4 1111.71    5.73
   0   5  -4 1062.73    5.43
   8   0   0  387.28    3.31
   8   0   0  393.25    2.97
  -8   0   0  386.18    3.92
   1   1  -9   68.91    1.51
   1   1  -9   69.45    1.83
   1  -1  -9   70.41    1.71
   1   1  -9   75.22    1.85
   1   1  -9   74.58    1.51
   1  -1  -9   73.35    1.98
   1  -1  -9   70.31    1.80
   1  -1  -9   73.02    1.81
   8   0  -7    0.32    0.70
   8   0  -7    0.13    0.57
   8   0  -7   -0.09    0.32
   8   0  -7    0.09    0.67
  -5   0  -5    0.45    0.73
   5   0   5    0.14    0.64
   5   0   5   -0.17    0.45
   5   0   5    0.17    0.43
  -4   5   2 1385.03    7.45
   4  -5  -2 1364.36    6.87
   4   5  -2 1377.19    7.88
  -4  -5   2 1267.41    7.31
   4  -5  -2 1405.21    6.54
   4   5  -2 1359.78    7.78
   4   5  -2 1466.50    8.18
   4  -5  -2 1250.91    6.04
  -4   5   2 1381.66    7.54
   6   0  -9    0.33    0.41
   6   0  -9   -0.01    0.58
   6   0  -9    0.26    0.70
   6   0  -9    0.29    0.64
  -3  -5   4   19.22    0.88
  -3   5   4   20.20    1.02
   3   5  -4   19.01    0.76
   3  -5  -4   19.29    0.85
   3   5  -4   19.86    0.83
   3  -5  -4   21.59    0.92
  -3   5   4   20.07    1.12
   3   5  -4   20.43    0.95
   3  -5  -4   20.13    0.72
   6   4  -4  179.84    2.17
   6   4  -4  190.52    2.45
  -6   4   4  194.84    2.43
   6   4  -4  184.65    2.70
   6   4  -4  186.08    2.91
   6  -4  -4  173.48    2.82
   6  -4  -4  181.90    2.50
  -6   4   4  180.73    2.51
   6  -4  -4  184.39    2.09
   6   4  -4  185.12    2.83
   4   3  -8  231.94    2.51
   4  -3  -8  234.87    3.01
   4   3  -8  225.36    2.28
   4  -3  -8  243.32    2.64
   4  -3  -8  230.81    3.40
   4   3  -8  224.10    2.99
   4  -3  -8  244.55    2.81
   6   3  -7  709.05    4.63
   6   3  -7  701.79    5.74
  -6   3   7  709.39    5.10
   6  -3  -7  708.59    5.11
   6  -3  -7  738.83    5.13
   6  -3  -7  675.55    4.83
   6   3  -7  722.10    4.17
   6   3  -7  716.68    5.31
   6  -3  -7  722.97    6.30
   6   3  -7  726.02    4.90
   6   3  -7  710.92    5.14
  -2   4  -5   22.58    0.89
   2   4   5   22.95    0.88
  -2   4  -5   23.59    1.12
  -2   4  -5   22.51    0.89
  -2   4  -5   22.28    0.95
  -2  -4  -5   25.59    1.10
  -2   4  -5   23.38    0.82
   2   4   5   21.52    1.49
   4   5  -1   19.98    0.91
  -4   5   1   22.05    1.05
   4  -5  -1   21.47    0.79
   4   5  -1   20.44    1.21
   4   5  -1   19.87    1.18
   4  -5  -1   20.92    0.84
   7  -1   2  501.29    3.66
   7  -1   2  517.72    4.05
  -7   1  -2  519.65    4.89
   7  -1   2  523.48    3.52
   7   1   2  510.53    4.57
   7  -1   2  512.64    4.11
   7   1   2  523.73    3.93
   7   1   2  526.80    4.24
   7   1   2  512.84    3.71
   4   4   3  445.55    4.13
   4   4   3  444.83    3.82
   4   4   3  449.83    5.38
  -4   4  -3  451.18    3.59
   4  -4   3  445.66    3.30
   4   4   3  442.96    3.71
  -4   4  -3  429.97    4.28
  -4   4  -3  440.28    3.12
  -4   4  -3  423.28    3.59
  -4   4  -3  437.98    3.66
   6  -2   3  297.13    2.70
  -6   2  -3  301.63    3.85
   6   2   3  316.06    3.95
   6  -2   3  309.41    3.14
   6   2   3  306.42    2.94
   6  -2   3  316.50    2.74
   6   2   3  296.14    3.18
   6   2   3  290.28    2.88
   6   4  -1  827.72    6.47
   6   4  -1  828.48    5.17
  -6   4   1  839.33    5.09
  -6   4   1  809.42    5.25
   6   4  -1  803.33    4.85
   6  -4  -1  811.36    5.15
   6   4  -1  815.28    5.81
   6   4  -1  825.80    6.09
   3  -2  -9  374.28    3.97
   3  -2  -9  386.19    3.98
   3  -2  -9  397.01    3.75
   3  -2  -9  399.62    3.31
   3   2  -9  372.54    3.74
   3   2  -9  372.89    3.54
   3   2  -9  379.02    3.02
   3  -2  -9  391.77    2.98
   3  -2  -9  391.74    4.30
   3   2  -9  393.65    3.44
  -3   0  -7    0.39    0.62
  -3   0  -7    0.27    0.37
  -3   0  -7   -0.14    0.53
  -3   0  -7    0.06    0.75
   3   0   7    0.23    0.55
   3   0   7    0.02    0.45
   1   3   7  443.06    5.03
  -1   3  -7  450.05    3.42
  -1   3  -7  457.60    3.66
  -1   3  -7  446.04    4.62
  -1  -3  -7  460.59    4.23
  -1  -3  -7  446.52    4.49
   4  -2  -9 1162.20    6.27
   4   2  -9 1164.26    6.10
   4   2  -9 1117.45    5.35
   4  -2  -9 1104.21    6.42
   4   2  -9 1073.99    5.98
   4   2  -9 1150.69    7.02
   4  -2  -9 1161.54    7.75
   4  -2  -9 1177.72    7.12
   4  -2  -9 1153.84    5.71
   4  -2  -9 1175.73    5.92
   4   5  -3  136.39    2.02
   4  -5  -3  138.32    2.09
   4  -5  -3  138.65    1.96
   4  -5  -3  138.25    1.82
  -4   5   3  139.90    2.36
  -4   5   3  138.05    2.25
   4   5  -3  137.91    2.36
  -4  -5   3  132.95    2.24
   5   4  -6  200.82    2.26
  -5   4   6  203.37    2.73
   5   4  -6  194.07    2.08
   5  -4  -6  205.74    2.65
   5   4  -6  202.79    2.10
   5   4  -6  202.47    2.58
  -5   4   6  200.18    2.59
  -5  -4   6  205.41    2.65
   5  -4  -6  193.59    3.15
   5   4  -6  198.94    2.84
   5  -4  -6  196.32    2.45
   5   4  -6  199.08    1.99
   5   4  -6  201.90    2.80
   4   1   6   51.55    1.19
  -4  -1  -6   51.28    1.70
  -4   1  -6   54.14    1.79
   4  -1   6   55.71    1.47
   4   1   6   54.39    1.65
   4  -1   6   52.79    1.19
  -4  -1  -6   51.64    1.58
  -4   1  -6   50.21    1.27
  -4  -1  -6   54.30    1.36
   8  -1   0   13.03    0.61
   8   1   0    9.48    0.93
   8   1   0   12.47    0.73
   8   1   0   14.25    0.86
   8  -1   0   13.61    0.83
  -8   1   0   11.24    0.92
   8  -1   0   14.14    0.72
   8   1   0   11.56    0.81
   8  -1   0   12.42    0.73
   8   1   0   13.22    0.70
   8  -1  -7   17.50    0.93
   8  -1  -7   21.37    1.03
   8  -1  -7   19.65    0.93
   8   1  -7   18.29    0.93
   8  -1  -7   17.64    1.07
  -8   1   7   16.91    0.83
   8   1  -7   18.32    1.06
   8   1  -7   17.70    0.76
   8   1  -7   17.62    1.01
   8   1  -7   17.84    1.19
   8   1  -7   17.11    0.94
   5  -1   5  120.31    1.74
   5   1   5  122.09    2.04
  -5  -1  -5  126.69    2.00
  -5   1  -5  124.64    2.61
  -5  -1  -5  120.77    2.46
   5  -1   5  128.15    2.13
   5   1   5  114.93    1.76
   5   1   5  127.45    2.49
   6  -1  -9  139.86    2.02
   6   1  -9  142.21    2.16
   6  -1  -9  146.85    2.85
   6   1  -9  144.37    2.46
   6  -1  -9  145.12    1.97
   6  -1  -9  141.38    2.29
   6   1  -9  136.06    2.35
   6  -1  -9  142.57    2.54
   6  -1  -9  152.87    2.20
   6   1  -9  133.51    2.48
   6   1  -9  145.70    2.19
   6   1  -9  140.28    2.05
   6  -3   2  134.31    1.87
   6   3   2  133.11    2.10
   6   3   2  128.96    1.99
   6   3   2  135.33    2.74
  -6   3  -2  129.60    1.99
   6   3   2  138.83    2.13
   6   3   2  132.47    2.15
   2  -2  -9  745.70    6.05
   2   2  -9  755.96    5.17
   2  -2  -9  739.48    4.48
   2  -2  -9  739.41    5.66
   2   2  -9  736.87    5.45
   2   2  -9  732.01    4.42
   2   2  -9  738.98    5.12
   2   2  -9  748.59    4.88
   2  -2  -9  743.58    5.15
  -2  -5  -3  381.17    3.37
   2   5   3  369.23    3.29
  -2   5  -3  374.64    3.14
  -2   5  -3  368.41    3.22
  -2   5  -3  367.32    3.49
  -2   5  -3  373.32    3.16
  -2  -5  -3  361.83    3.66
   2  -5   3  362.63    3.11
   7  -3  -6    8.54    0.50
   7  -3  -6    7.71    0.94
   7   3  -6    7.74    0.75
   7   3  -6    8.10    0.65
   7  -3  -6    8.10    0.70
   7   3  -6    8.10    0.91
   7   3  -6    8.16    0.81
  -7   3   6    6.78    0.72
   7   3  -6    9.07    0.71
   4   5   0    1.09    0.80
  -4   5   0    1.32    0.53
  -4   5   0    0.14    0.35
   4   5   0    0.10    0.51
   4   5   0   -0.12    0.62
  -4  -5   0    0.33    0.52
  -4   5   0   -0.04    0.50
   4  -5   0    0.19    0.39
  -1   3   8  103.61    1.79
  -1   3   8   99.18    2.34
   1  -3  -8  104.85    2.04
   1   3  -8  100.66    2.01
   1  -3  -8  106.09    1.85
   1   3  -8   98.91    1.58
   1  -3  -8   98.53    2.21
   1  -3  -8  102.95    1.48
   1   3  -8  100.15    1.76
   1  -3  -8   96.59    2.10
   6   0   4  219.89    2.66
  -6   0  -4  215.13    3.28
  -3   4   7  105.75    1.95
   3  -4  -7  108.97    1.77
   3  -4  -7  109.79    1.99
   3  -4  -7  103.15    2.28
  -3   4   7  105.33    2.27
   3   4  -7  107.26    1.86
   3   4  -7  101.48    1.54
   3   4  -7  108.98    1.64
   3  -4  -7  104.45    1.89
   3   4  -7  107.94    1.76
   2   4  -7  143.79    1.92
   2   4  -7  134.40    2.02
   2  -4  -7  137.73    2.14
   2  -4  -7  137.76    2.22
  -2   4   7  134.84    2.12
  -2   4   7  134.12    2.71
   2  -4  -7  141.90    1.96
   2  -4  -7  139.91    2.64
   2  -4  -7  130.00    1.93
   2   4  -7  142.99    1.82
   8   2  -1  981.56    6.22
   8   2  -1 1000.97    6.13
   8   2  -1 1010.40    6.10
   8  -2  -1  995.49    6.15
   8   2  -1  980.61    5.36
   8  -2  -1  997.28    5.53
   8   2  -1 1017.68    7.06
   8   2  -1 1007.25    6.51
  -8   2   1  974.15    5.28
   8  -2  -6   14.52    1.03
   8  -2  -6   13.19    1.12
   8  -2  -6   14.23    0.83
  -8   2   6   14.08    0.78
   8   2  -6   14.06    0.84
   8   2  -6   16.52    0.82
   8   2  -6   13.85    1.09
   8  -2  -6   15.41    0.90
   8   2  -6   15.09    0.84
   8  -2  -6   15.64    0.66
   3   1   7   60.35    1.75
   3  -1   7   59.63    1.24
  -3   1  -7   60.81    1.97
  -3  -1  -7   58.56    1.78
  -3  -1  -7   57.07    1.71
  -3   1  -7   61.90    1.38
  -3   1  -7   61.43    1.76
   3   1   7   61.75    1.27
  -3  -1  -7   59.12    1.44
   3  -1   7   66.04    1.62
   7   3   0  806.70    5.04
   7   3   0  837.01    5.79
   7   3   0  808.63    5.86
  -7   3   0  838.48    5.04
   7  -3   0  794.26    4.13
   7   3   0  797.34    6.32
   7  -3   0  820.19    4.98
   7   3   0  859.43    6.77
   7   3   0  822.98    5.40
   3   5   2    3.97    1.06
  -3   5  -2    2.64    0.53
   3  -5   2    3.56    0.44
   3   5   2    2.55    0.60
   3   5   2    3.44    0.70
  -3  -5  -2    2.56    0.56
  -3   5  -2    2.50    0.55
  -3   5  -2    2.53    0.60
  -3   5  -2    2.37    0.48
   6  -4  -5  275.78    3.16
   6   4  -5  286.08    3.59
   6  -4  -5  276.42    3.71
   6  -4  -5  296.62    2.60
  -6   4   5  274.01    3.15
  -6   4   5  284.71    2.91
   6   4  -5  277.93    3.02
   6   4  -5  287.87    3.39
   6   4  -5  276.84    2.65
   6   4  -5  287.63    3.49
   5  -3  -8   79.01    1.63
   5   3  -8   79.64    1.93
  -5   3   8   77.22    1.75
   5  -3  -8   75.66    1.74
   5   3  -8   78.20    1.47
   5   3  -8   77.93    1.61
   5  -3  -8   75.69    2.08
   5  -3  -8   83.88    1.62
   5   3  -8   75.37    1.26
   5   3  -8   78.64    1.78
   0   0  -9    0.11    0.46
   0   0  -9    0.03    0.56
   0   0  -9   -0.17    0.70
   0   0  -9    0.11    0.49
   0   0  -9   -0.01    0.68
  -1   4  -6 1398.25    6.13
   1   4   6 1379.90    9.69
  -1  -4  -6 1405.87    7.73
  -1   4  -6 1374.67    6.51
  -1   4  -6 1373.47    6.52
  -1   4  -6 1358.57    7.93
  -1   4  -6 1358.86    7.01
   5   2  -9   20.16    1.10
   5  -2  -9   19.60    0.83
   5   2  -9   20.52    0.73
   5  -2  -9   22.09    0.87
   5  -2  -9   19.69    1.07
   5  -2  -9   21.22    0.88
   5   2  -9   21.12    0.77
   5   2  -9   20.72    0.92
   1   5   4  158.22    3.33
   1  -5   4  160.68    2.03
   1   5   4  156.01    2.03
  -1   5  -4  153.18    2.26
  -1   5  -4  164.42    2.12
  -1  -5  -4  163.60    2.40
  -1  -5  -4  167.56    2.05
  -1   5  -4  161.53    2.07
  -1   5  -4  158.77    2.08
   5   4   2  740.15    5.42
   5   4   2  764.04    5.36
  -5   4  -2  737.20    4.86
  -5   4  -2  739.29    5.83
   5   4   2  737.12    4.98
   5  -4   2  726.81    4.57
  -5   4  -2  730.93    4.85
   5   4   2  763.64    6.91
   9   0  -4  847.30    6.18
   9   0  -4  851.01    5.25
   9   0  -4  850.21    5.67
   9   0  -4  851.73    6.05
   2  -5  -5   71.79    1.80
  -2  -5   5   74.42    1.42
   2   5  -5   74.16    1.46
  -2   5   5   74.31    2.11
   2   5  -5   75.64    1.49
   2  -5  -5   76.82    1.62
   2   5  -5   75.80    1.51
  -2   5   5   72.83    1.62
  -4   5   4  141.60    2.43
   4  -5  -4  138.16    1.80
   4   5  -4  138.03    1.97
   4   5  -4  143.49    2.30
   4  -5  -4  142.88    2.18
   4   5  -4  131.86    1.67
  -4  -5   4  132.37    2.25
   4  -5  -4  138.65    2.01
   4   5  -4  133.41    2.31
  -1  -2  -8   25.35    1.23
  -1  -2  -8   26.37    1.19
  -1   2  -8   25.94    0.94
  -1   2  -8   23.87    1.32
  -1   2  -8   25.19    0.94
   1   2   8   24.40    1.26
  -1  -2  -8   24.12    1.08
  -1   2  -8   26.62    1.14
   6   4   0  107.96    2.09
   6   4   0  105.67    1.77
   6  -4   0  104.81    1.73
  -6   4   0  105.87    1.83
  -6   4   0  112.15    1.85
   6   4   0  111.07    2.54
   6   4   0  110.12    2.19
   9   0  -3    0.45    0.54
   9   0  -3    0.46    0.53
   9   0  -3   -0.11    0.65
   1   5  -5  182.42    2.23
   1  -5  -5  203.39    2.96
  -1   5   5  191.80    2.42
  -1   5   5  196.43    3.45
   1  -5  -5  195.42    2.50
   1   5  -5  174.07    2.22
   1   5  -5  196.70    2.46
  -1  -5   5  198.89    2.26
   4   4  -7  220.39    2.83
   4   4  -7  216.95    2.38
   4   4  -7  214.12    2.19
   4   4  -7  216.16    2.23
   4   4  -7  216.90    2.72
   4  -4  -7  214.85    3.33
  -4   4   7  215.68    2.83
   4  -4  -7  213.89    2.50
  -6  -1  -4  560.28    4.33
   6  -1   4  568.53    4.18
   6   1   4  561.39    4.41
   6   1   4  571.48    4.04
  -6   1  -4  554.86    5.47
  -6  -1  -4  559.49    5.15
   6  -1   4  580.25    4.64
   9   0  -5   -0.08    0.39
   9   0  -5    0.30    0.62
   9   0  -5    0.08    0.56
   9   0  -5   -0.02    0.65
   9   0  -5    0.45    0.60
  -2   0  -8  479.20    4.96
   2   0   8  478.77    3.35
   2   0   8  482.23    4.45
  -2   0  -8  481.58    5.05
   1   4  -7  185.32    2.17
   1  -4  -7  194.94    3.07
  -1   4   7  193.71    2.41
   1  -4  -7  200.66    2.30
   1   4  -7  189.05    2.43
  -1   4   7  187.07    3.31
   1  -4  -7  190.19    2.66
   3  -5  -5    0.72    0.51
  -3   5   5    0.93    0.72
  -3   5   5    0.19    0.56
   3  -5  -5    0.52    0.62
   3  -5  -5    0.98    0.57
   3   5  -5    0.77    0.44
  -3  -5   5    0.24    0.37
   3   5  -5    0.73    0.42
   3   5  -5    0.86    0.47
   0   1  -9    0.17    0.55
   0   1  -9    0.46    0.44
   0  -1  -9    0.53    0.51
   0  -1  -9    0.18    0.64
   0  -1  -9    0.43    0.60
   0   1  -9    0.28    0.48
   0   1  -9    0.43    0.64
   0   1  -9    0.22    0.68
   0  -1  -9    0.65    0.61
   7   2  -8   43.32    1.33
   7  -2  -8   46.54    1.29
  -7   2   8   41.84    1.29
   7  -2  -8   48.09    1.40
   7  -2  -8   44.82    1.45
   7  -2  -8   43.23    1.78
   7   2  -8   42.25    1.26
   7   2  -8   43.93    1.57
   7  -2  -8   43.72    1.28
  -4  -3  -5 2686.46   12.07
  -4   3  -5 2653.90    9.77
  -4   3  -5 2610.01   12.71
  -4   3  -5 2694.16    9.31
  -4  -3  -5 2571.33   11.27
  -4   3  -5 2646.65   10.18
   4   3   5 2660.86   13.66
   4   3   5 2601.01   10.20
   1   2  -9   55.08    1.48
   1  -2  -9   57.22    1.76
   1  -2  -9   54.35    1.62
   1  -2  -9   56.72    1.55
   1   2  -9   58.94    1.69
   1   2  -9   56.06    1.38
   1  -2  -9   57.94    1.24
   9   1  -4   69.49    1.71
   9   1  -4   65.90    1.83
   9   1  -4   66.13    1.69
   9  -1  -4   65.21    1.40
   9  -1  -4   61.16    1.61
   9   1  -4   65.74    1.74
   9   1  -4   64.26    1.64
   9  -1  -4   64.83    1.82
   9   1  -4   68.58    1.60
   9  -1  -4   66.70    1.53
   4   0 -10  106.47    1.88
   4   0 -10  110.10    2.19
   4   0 -10  114.26    2.07
   4   0 -10  107.13    2.20
   4   0 -10  114.31    2.13
   3  -3   6   40.00    1.14
  -3   3  -6   41.95    1.09
  -3   3  -6   40.21    1.14
   3   3   6   37.89    1.10
   3   3   6   42.65    1.76
  -3  -3  -6   39.36    1.42
  -3   3  -6   41.33    1.58
   4  -5   1   69.86    1.40
   4   5   1   73.59    2.27
   4   5   1   71.07    1.83
   4   5   1   73.98    1.61
  -4   5  -1   70.33    1.36
  -4  -5  -1   68.62    1.69
  -4   5  -1   71.59    1.67
  -4   5  -1   73.60    1.38
  -4   5  -1   72.79    1.65
   3   0 -10    1.71    0.70
   3   0 -10    2.32    0.67
   3   0 -10    3.54    0.67
   3   0 -10    1.46    0.58
   3   0 -10    2.52    0.62
   3   0 -10    1.30    0.54
   3   0 -10    1.99    0.62
   7   0  -9    0.01    0.57
   7   0  -9   -0.28    0.71
   7   0  -9    0.13    0.70
   7   0  -9   -0.35    0.61
   7   2   2  257.98    2.92
   7   2   2  255.02    2.73
   7  -2   2  257.24    2.44
   7   2   2  253.24    3.03
   7   2   2  260.43    3.61
  -7   2  -2  265.01    3.58
   8   0   1    0.75    0.65
  -8   0  -1    0.34    0.60
   8   0   1    0.01    0.37
   8   0   1    0.14    0.49
   8   0   1    1.09    0.48
   8   0  -8  131.24    2.67
   8   0  -8  132.75    2.19
   8   0  -8  126.07    2.53
   8   0  -8  130.73    2.33
   9   1  -3    1.23    0.65
   9  -1  -3    0.45    0.41
   9   1  -3    0.83    0.64
   9  -1  -3    0.41    0.49
   9  -1  -3    0.91    0.63
   9   1  -3    1.29    0.56
   9   1  -5  141.66    2.34
   9  -1  -5  142.95    2.00
   9   1  -5  142.64    2.59
   9  -1  -5  142.28    2.72
   9  -1  -5  139.78    2.34
   9   1  -5  142.32    2.48
   9  -1  -5  147.85    2.30
   9   1  -5  138.37    2.12
   9   1  -5  141.89    2.45
   9   1  -5  146.58    2.43
  -2   1  -8    3.95    0.70
   2  -1   8    4.75    0.63
  -2   1  -8    4.92    0.94
  -2  -1  -8    4.74    0.85
  -2  -1  -8    4.51    0.63
  -2  -1  -8    4.12    0.72
   2   1   8    4.17    0.50
   2   1   8    4.86    0.75
   2  -1   8    4.20    0.54
  -2   1  -8    5.48    0.74
  -5  -3  -4  415.55    4.17
  -5   3  -4  425.13    4.70
   9   0  -2  859.57    5.60
   9   0  -2  844.33    6.01
   9   0  -2  842.71    5.40
   0   5  -5    0.08    0.31
   0  -5   5    0.67    0.35
   0  -5  -5    0.30    0.46
   0   5   5    0.63    0.45
   0  -5  -5    0.56    0.58
   0   5   5    0.48    0.96
   0   5  -5    0.43    0.61
   0  -3  -8  181.75    2.70
   0  -3  -8  180.24    2.41
   0  -3  -8  186.77    3.05
   0   3   8  183.51    2.23
   0   3  -8  175.89    2.87
   0   3  -8  178.31    2.22
   0   3  -8  176.40    2.32
   0  -3  -8  179.44    2.95
   0   3   8  174.30    3.18
  -4   2  -6  320.75    3.70
   4  -2   6  306.65    2.79
  -4  -2  -6  281.42    3.43
   4  -2   6  299.35    3.16
  -4  -2  -6  306.55    3.44
  -4   2  -6  302.22    2.71
   4   2   6  300.87    4.12
   4   2   6  326.53    3.02
  -4  -2  -6  299.81    3.85
   9   0  -6    9.43    0.90
   9   0  -6   11.32    0.70
   9   0  -6   14.23    0.93
   9   0  -6    9.16    0.91
   9   0  -6    9.14    0.89
   9   0  -6   16.24    1.10
  -5   5   2  402.64    3.91
   5  -5  -2  373.50    3.53
   5  -5  -2  387.79    3.26
   5  -5  -2  389.42    3.27
  -5   5   2  386.99    3.76
   5   5  -2  412.62    4.47
   5   5  -2  398.38    3.55
   7   0   3    0.18    0.52
   7   0   3    0.31    0.63
  -7   0  -3   -0.14    0.65
   7   0   3    0.14    0.50
   5   0 -10   26.58    1.06
   5   0 -10   24.17    1.22
   5   0 -10   25.91    1.02
   8   2   0    2.07    0.67
   8  -2   0    3.24    0.55
   8   2   0    2.15    0.52
   8  -2   0    2.24    0.56
  -8   2   0    2.11    0.71
   8   2   0    2.20    0.78
   8  -2   0    1.96    0.40
   8   2   0    2.25    0.53
   8   2   0    2.57    0.61
   8   2  -7  331.19    3.69
   8  -2  -7  332.63    3.72
   8   2  -7  349.61    3.33
   8   2  -7  335.10    3.42
   8  -2  -7  334.64    3.38
   8   2  -7  345.52    4.22
   8  -2  -7  341.75    4.39
   8  -2  -7  362.08    3.75
   8   2  -7  354.03    3.39
  -8   2   7  321.92    3.25
   8  -2  -7  342.02    3.56
   6  -4  -6  297.08    3.35
   6   4  -6  292.85    3.69
   6  -4  -6  284.60    3.92
  -6   4   6  282.35    3.31
   6   4  -6  287.86    2.56
   6   4  -6  272.91    3.12
   6   4  -6  274.21    3.42
   6   4  -6  301.56    2.72
  -5  -2  -5    9.99    0.83
   5   2   5    9.64    1.09
  -5   2  -5    9.56    1.08
   5  -2   5   10.18    0.71
   5  -2   5    9.79    0.76
  -5  -2  -5   10.12    0.77
   5   2   5   10.23    0.74
   5   5  -3  130.39    2.01
   5   5  -3  137.26    2.53
   5  -5  -3  128.42    2.10
   5  -5  -3  137.86    1.98
   5  -5  -3  131.60    1.86
  -5   5   3  129.71    2.23
  -5   5   3  129.60    2.19
   5   5  -3  132.56    2.43
   8  -3  -3 1023.46    6.84
   8  -3  -3 1081.46    5.93
  -8   3   3 1017.13    5.46
   8   3  -3 1038.68    6.91
   8  -3  -3 1024.75    5.81
   8   3  -3 1033.67    6.05
   8   3  -3 1068.65    7.41
   8   3  -3 1021.73    5.53
   8   3  -3 1032.35    6.70
   8   3  -4  277.59    3.75
   8   3  -4  276.03    2.91
   8   3  -4  274.26    3.36
   8  -3  -4  260.19    3.57
   8  -3  -4  275.05    2.79
   8  -3  -4  276.77    3.22
  -8   3   4  272.18    2.89
   8   3  -4  272.05    3.47
   8   3  -4  273.45    2.56
   8  -3  -4  276.18    2.94
   8   3  -4  270.54    3.32
   4   1 -10  507.25    4.20
   4   1 -10  493.70    4.14
   4   1 -10  489.44    3.65
   4   1 -10  512.46    4.11
   4  -1 -10  502.83    3.88
   4   1 -10  508.68    4.21
   4  -1 -10  504.14    5.01
   4   1 -10  516.88    4.65
   4  -1 -10  488.59    4.21
  -6   2   9 1619.30    8.25
   6   2  -9 1610.16    7.52
   6  -2  -9 1609.69    8.75
   6  -2  -9 1646.62    7.75
   6  -2  -9 1606.45    7.73
   6   2  -9 1617.82    9.05
   6  -2  -9 1605.52    7.65
   6   2  -9 1577.53    7.69
   7   3  -7    7.80    0.93
   7   3  -7    6.68    0.82
  -7   3   7    7.27    0.73
   7   3  -7    6.73    0.65
   7   3  -7    7.23    0.66
   7  -3  -7    5.43    0.81
   7   3  -7    6.40    0.72
   7  -3  -7    6.89    0.70
   7  -3  -7    6.94    0.98
   7  -3  -7    7.08    0.78
   3   1 -10  155.56    2.44
   3  -1 -10  150.95    2.40
   3   1 -10  152.25    2.06
   3  -1 -10  146.26    2.65
   3  -1 -10  152.80    2.07
   3   1 -10  160.92    2.52
   3   1 -10  162.00    2.28
   3   1 -10  148.00    2.42
   3  -1 -10  142.53    2.46
   6  -3  -8   96.58    1.88
   6   3  -8   96.88    2.03
   6  -3  -8   97.21    1.96
   6  -3  -8  102.96    1.83
   6   3  -8   92.12    1.58
   6   3  -8   96.21    2.19
   6   3  -8   95.54    1.86
   6  -3  -8   96.16    1.77
  -6   3   8   93.06    1.92
   6  -3  -8   94.22    2.43
   6   3  -8   98.69    1.80
   7   1  -9  215.50    2.70
   7  -1  -9  239.21    2.87
   7  -1  -9  227.02    2.73
   7   1  -9  224.95    3.15
   7  -1  -9  230.09    3.77
   7  -1  -9  240.14    3.39
   7  -1  -9  230.49    2.56
   7   1  -9  238.28    3.22
   7   1  -9  229.22    2.80
   7  -1  -9  227.13    2.93
   8  -1   1    4.15    0.50
   8  -1   1    1.46    0.55
   8  -1   1    1.57    0.55
   8   1   1    2.23    0.61
   8   1   1    1.16    0.64
   8   1   1    2.00    0.48
  -8   1  -1    1.75    0.66
   8   1   1    1.51    0.48
   8  -1   1    1.95    0.45
   8  -1  -8   28.24    1.45
   8   1  -8   30.31    1.29
   8  -1  -8   27.62    1.12
  -8   1   8   27.50    1.05
   8  -1  -8   33.41    1.23
   8   1  -8   28.57    1.10
   8   1  -8   28.31    1.40
   8  -1  -8   30.42    1.33
   8   1  -8   29.83    1.15
   8  -1  -8   26.32    1.08
   8   1  -8   27.69    1.22
  -5   4   7    0.25    0.64
   5   4  -7    0.16    0.39
   5   4  -7   -0.02    0.51
   5  -4  -7    0.06    0.77
   5   4  -7    0.11    0.49
   5   4  -7    0.42    0.47
   5   4  -7    0.79    0.57
   5   4  -7    0.33    0.36
   5   4  -7    0.26    0.43
   2   0 -10   30.84    1.23
   2   0 -10   31.66    1.32
   2   0 -10   31.15    1.22
   2   0 -10   31.23    1.21
   2   0 -10   31.05    1.10
  -5   5   1  591.52    4.75
   5  -5  -1  571.28    4.24
  -5   5   1  588.83    4.53
   5   5  -1  603.72    5.24
   5   5  -1  622.46    5.97
   5   5  -1  599.67    5.61
   5   5  -1  619.60    5.24
   4   5  -5  125.71    1.90
   4   5  -5  126.14    1.83
   4   5  -5  124.52    1.71
  -4  -5   5  132.03    2.11
   4   5  -5  130.51    2.21
  -4   5   5  132.72    2.38
   4  -5  -5  133.61    1.68
   4  -5  -5  130.81    2.17
   4  -5  -5  120.18    1.95
   4  -5  -5  126.00    2.47
   0   6   0 3465.45   12.34
   0   6   0 3458.38   11.89
  -7   3  -1 5224.90   16.42
   7  -3   1 5125.97   14.97
   7   3   1 5186.46   17.12
   7   3   1 5220.84   17.67
   7   3   1 5089.18   17.50
   7   3   1 5154.94   16.52
   7  -3   1 5256.23   16.67
   7   3   1 5115.11   19.61
   3   4   5 1009.70    8.45
  -3   4  -5 1005.23    5.30
  -3  -4  -5 1010.36    6.62
  -3   4  -5  960.11    5.69
  -3   4  -5  974.44    5.44
   3   4   5  988.51    5.69
  -3   4  -5 1005.16    7.14
   9   1  -2  225.07    2.91
   9  -1  -2  232.08    3.03
   9   1  -2  229.80    2.28
   9  -1  -2  228.09    2.68
   9  -1  -2  233.38    2.54
   9   1  -2  236.30    2.91
   9  -1  -2  219.07    2.65
   9   1  -2  226.60    3.15
   0  -4  -7  326.29    3.63
   0  -4  -7  334.01    4.05
   0   4   7  331.94    4.54
   0   4  -7  327.98    3.54
   0   4  -7  328.21    3.01
   0   4  -7  333.85    3.23
   0   4  -7  333.14    3.07
   3  -2   7  380.29    3.11
  -3  -2  -7  381.13    4.45
  -3   2  -7  380.37    3.10
   3   2   7  366.48    4.45
  -3  -2  -7  370.36    3.96
  -3  -2  -7  382.47    3.88
   3   2   7  377.32    3.23
   3  -2   7  377.42    3.55
   2   3   7 1096.07    8.34
   2  -3   7 1074.37    5.84
  -2   3  -7 1129.36    5.68
  -2  -3  -7 1108.34    7.59
  -2   3  -7 1113.18    5.92
  -2   3  -7 1081.67    7.82
   2   3   7 1089.75    5.65
  -4   4  -4   17.69    0.76
   4   4   4   16.53    0.90
  -4   4  -4   17.25    0.87
   4  -4   4   19.28    0.76
  -4   4  -4   17.67    0.82
  -4  -4  -4   16.85    1.03
  -4   4  -4   18.31    1.11
   7   4  -3   32.87    1.40
   7   4  -3   31.17    1.14
   7   4  -3   33.20    1.40
   7   4  -3   30.72    1.03
  -7   4   3   32.73    1.17
   7  -4  -3   29.73    1.00
  -7   4   3   30.80    0.99
   7  -4  -3   30.34    0.98
   7  -4  -3   31.58    1.18
   6   4   1  261.58    3.26
   6   4   1  256.89    2.93
   6  -4   1  259.16    2.73
  -6   4  -1  249.57    3.34
  -6   4  -1  255.45    2.86
  -6   4  -1  252.12    2.77
   6   4   1  251.59    3.22
   9  -1  -6  111.13    2.20
   9   1  -6  116.81    2.21
   9  -1  -6  116.00    2.24
   9   1  -6  115.63    2.50
   9   1  -6  119.69    2.26
   9  -1  -6  121.62    1.83
   9  -1  -6  120.18    2.11
   9  -1  -6  115.39    2.47
   9   1  -6  116.66    2.28
   9   1  -6  118.98    2.04
   9  -1  -6  117.54    2.15
   9   1  -6  120.81    2.00
  -3   5  -3   61.98    1.59
  -3   5  -3   59.88    1.50
  -3   5  -3   60.75    1.37
   3   5   3   63.41    2.25
  -3   5  -3   62.16    1.31
  -3  -5  -3   62.44    1.64
  -3   5  -3   63.23    1.35
   3  -5   3   61.15    1.30
   3   5   3   64.17    1.48
  -3  -5  -3   67.08    1.54
   0   6   1  928.82    5.52
   0   6  -1  935.88    5.31
   0  -6  -1  964.40    5.72
   0   6  -1  955.34    6.43
   0   6  -1  943.84    5.62
   0  -6  -1  949.28    5.42
   0   6   1  953.22    7.07
   0   6   1  923.76    5.27
  -2   5  -4   10.52    0.75
  -2  -5  -4    9.09    0.79
   2   5   4    9.13    0.70
  -2   5  -4    9.61    0.64
   2  -5   4    9.02    0.57
   2   5   4    7.89    1.22
  -2   5  -4    9.08    0.82
  -2   5  -4   10.24    0.70
   7  -1   3  166.21    2.32
   7   1   3  166.20    2.43
   7   1   3  166.12    2.85
   7  -1   3  160.22    2.07
  -7   1  -3  159.52    2.89
   7  -1   3  160.24    2.02
   8   3  -2  210.60    2.70
   8   3  -2  222.18    3.06
   8  -3  -2  206.85    2.80
  -8   3   2  209.56    2.37
   8   3  -2  217.19    3.32
   8   3  -2  214.29    3.10
   8   3  -2  205.08    2.43
   8   3  -5  594.12    5.64
   8   3  -5  575.56    5.13
   8   3  -5  627.51    5.11
   8  -3  -5  641.89    4.67
  -8   3   5  617.47    4.53
   8  -3  -5  651.45    4.26
   8  -3  -5  603.48    5.66
   8  -3  -5  643.77    5.06
   8   3  -5  631.65    4.40
   8   3  -5  625.87    5.04
   1   6   0  263.04    2.67
  -1  -6   0  254.49    2.94
  -1   6   0  265.34    2.61
   1   6   0  249.81    3.54
   1   6   0  263.02    2.78
  -1   6   0  264.29    3.02
  -1   6   0  259.08    3.31
   5  -1 -10  202.55    3.29
   5  -1 -10  212.36    2.36
   5  -1 -10  211.13    2.56
   5   1 -10  216.85    3.15
   5  -1 -10  201.86    3.06
   5   1 -10  206.86    2.66
   5   1 -10  215.01    2.30
   1   6  -1 1319.63    6.62
  -1  -6   1 1308.77    7.08
  -1   6   1 1323.62    6.24
   1   6  -1 1317.06    6.58
  -1   6   1 1325.13    7.03
   1   6  -1 1333.90    7.94
   7  -4  -4  226.73    2.64
   7   4  -4  220.04    2.47
   7   4  -4  227.86    2.88
   7   4  -4  228.79    3.36
   7  -4  -4  226.68    3.29
  -7   4   4  220.43    2.83
   7  -4  -4  231.80    2.52
   7   4  -4  239.22    3.25
   7  -4  -4  226.26    2.93
  -7   4   4  232.38    2.56
   5  -5  -4 1438.63    7.67
   5   5  -4 1485.07    7.14
  -5   5   4 1495.51    7.96
   5   5  -4 1502.38    8.37
   5   5  -4 1462.03    8.41
  -5   5   4 1472.25    7.77
   5  -5  -4 1518.22    6.74
   5  -5  -4 1435.58    7.04
   7  -4  -2  222.55    2.77
  -7   4   2  221.12    2.57
   7   4  -2  218.96    2.59
   7   4  -2  232.72    3.35
   7  -4  -2  224.60    2.56
  -7   4   2  227.19    2.77
   7   4  -2  226.94    2.56
   7   4  -2  231.74    3.18
   2   1 -10  511.17    4.66
   2   1 -10  502.97    4.80
   2   1 -10  485.59    4.34
   2  -1 -10  500.62    4.55
   2  -1 -10  499.76    4.81
   2   1 -10  509.47    4.16
   2  -1 -10  521.16    4.68
   2   1 -10  495.74    3.88
   6  -3   3  200.29    2.24
  -6   3  -3  196.94    2.51
   6   3   3  199.53    2.49
   6   3   3  200.91    3.51
  -6  -2  -4  822.68    5.73
  -6   2  -4  817.94    6.79
   6  -2   4  805.44    4.80
   6  -2   4  815.19    5.49
   6   2   4  832.89    5.62
  -3   3   9  196.77    2.72
   3  -3  -9  194.21    2.49
   3  -3  -9  202.70    2.53
   3  -3  -9  198.60    2.83
   3  -3  -9  197.97    3.24
   3   3  -9  197.42    2.25
  -1   0  -9    0.11    0.63
  -1   0  -9    0.08    0.45
  -1   0  -9    1.16    0.76
  -1   0  -9    0.02    0.50
  -1   0  -9   -0.41    0.82
  -2   4  -6  296.68    2.82
   2   4   6  303.05    2.91
   2   4   6  306.91    4.59
  -2  -4  -6  314.27    3.62
  -2   4  -6  302.83    3.80
  -2   4  -6  294.68    3.03
  -2   4  -6  308.98    2.86
   9   0  -1    0.11    0.54
  -9   0   1    0.58    0.58
   9   0  -1   -0.03    0.45
   9   0  -1    0.17    0.38
   9   0  -1    0.07    0.48
  -1   6  -1  445.65    3.50
   1   6   1  446.85    3.65
  -1   6  -1  457.85    4.17
   1   6   1  446.78    5.05
   1  -6   1  428.87    3.58
  -1   6  -1  437.42    3.85
   1   6   1  448.66    3.48
  -1  -6  -1  454.36    3.91
   4  -3  -9    0.51    0.83
   4   3  -9    0.42    0.55
   4  -3  -9    0.75    0.46
   4   3  -9    0.08    0.50
   4   3  -9   -0.25    0.51
   4  -3  -9   -0.10    0.48
  -4   3   9   -0.36    0.68
   4  -3  -9   -0.07    0.59
   6   0 -10 1293.03    6.93
   6   0 -10 1287.71    6.50
   5   5   0  149.49    3.01
  -5   5   0  151.13    2.33
  -5   5   0  150.78    2.49
   5  -5   0  153.77    2.09
  -5   5   0  149.67    2.26
  -5   5   0  153.85    1.97
   5   5   0  148.21    2.24
   5   5   0  149.00    2.55
   5   5   0  151.35    2.62
   0   2  -9  619.83    5.44
   0  -2  -9  558.19    4.84
   0  -2  -9  569.72    3.90
   0  -2  -9  591.50    5.30
   0  -2  -9  583.27    5.84
   0   2  -9  548.19    3.95
   0   2  -9  560.33    5.34
   0  -2   9  557.89    3.60
   0   2  -9  582.15    4.26
   0  -2  -9  534.73    4.66
   1  -6  -2   14.25    0.73
  -1   6   2   13.82    0.70
   1   6  -2   15.68    0.82
   1   6  -2   14.60    0.88
   1   6  -2   15.07    0.83
  -1  -6   2   13.72    0.77
  -1   6   2   14.75    0.88
  -1   6   2   13.22    1.14
   1  -6  -2   15.55    0.83
  -4   5  -2   24.70    0.88
   4   5   2   26.46    1.23
   4   5   2   26.42    1.08
   4   5   2   26.71    1.57
  -4   5  -2   26.00    1.08
  -4  -5  -2   23.33    1.11
   4  -5   2   25.30    0.90
  -4   5  -2   25.28    1.10
  -4   5  -2   25.43    0.93
   5   4   3 1059.17    6.78
   5   4   3 1089.60    8.61
   5   4   3 1056.39    6.21
   5  -4   3 1097.91    5.78
  -5   4  -3 1090.54    6.02
  -5   4  -3 1065.92    7.40
  -2   5   6  753.42    6.52
   2  -5  -6  788.24    5.27
   2  -5  -6  759.76    4.95
  -2   5   6  743.44    5.21
   2   5  -6  784.57    4.76
   2   5  -6  772.33    4.67
   2   5  -6  765.95    4.94
   2  -5  -6  754.24    5.27
   2  -5  -6  750.99    5.98
   9   0  -7    0.73    0.62
   9   0  -7    0.03    0.64
   9   0  -7   -0.15    0.65
   9   0  -7    0.22    0.75
   1   5   5   25.82    0.90
   1   5   5   27.25    1.61
  -1  -5  -5   27.77    1.11
  -1   5  -5   26.24    0.87
  -1   5  -5   25.25    1.06
  -1  -5  -5   27.36    1.25
  -1   5  -5   26.65    0.97
  -1   5  -5   27.48    1.03
   9  -2  -4    3.81    0.50
   9   2  -4    3.93    0.81
   9  -2  -4    3.06    0.76
   9   2  -4    4.17    0.66
   9   2  -4    4.07    0.73
   9   2  -4    6.52    0.70
   9  -2  -4    3.63    0.61
   0   6   2  506.06    3.91
   0  -6   2  520.19    4.06
   0   6  -2  514.96    3.84
   0  -6  -2  493.69    3.97
   0   6   2  499.65    3.68
   0   6  -2  499.61    4.13
   0   6  -2  489.59    4.25
   0  -6  -2  534.64    4.10
  -2   6   1    7.30    0.78
   2   6  -1    7.79    0.59
   2  -6  -1    7.09    0.58
   2   6  -1    7.51    0.84
  -2   6   1    6.45    0.56
   2   6  -1    6.24    0.68
  -3   5   6 1151.13    6.83
   3  -5  -6 1166.83    7.71
   3   5  -6 1190.05    6.13
   3   5  -6 1209.61    6.02
   3  -5  -6 1179.96    6.86
  -3   5   6 1137.12    7.82
   3   5  -6 1164.95    5.96
   2   3  -9 1304.59    7.11
   2   3  -9 1300.93    6.81
   2  -3  -9 1287.66    7.91
  -2   3   9 1311.43    7.13
   2  -3  -9 1306.76    6.77
   2  -3  -9 1318.41    6.86
   2   3  -9 1314.66    6.36
   7   4  -5    0.08    0.75
  -7   4   5    0.43    0.61
   7   4  -5   -0.01    0.41
   7   4  -5    0.40    0.53
   7   4  -5    1.61    0.59
   7   4  -5    0.20    0.72
   7  -4  -5    0.07    0.45
   7  -4  -5    1.07    0.36
   7  -4  -5    0.97    0.73
   7  -4  -5    2.34    0.66
  -5   0  -6  981.96    7.55
   5   0   6  968.47    6.68
  -2   6   0    1.86    0.49
  -2   6   0    0.56    0.60
   2   6   0    2.17    0.81
  -2  -6   0    0.85    0.48
   2   6   0    1.17    0.58
  -2   6   0    1.01    0.61
   9   2  -3  304.86    3.62
   9   2  -3  310.09    2.71
   9  -2  -3  299.82    3.04
   9   2  -3  299.56    3.84
   9  -2  -3  307.47    2.76
   9  -2  -3  300.47    3.12
   9   2  -3  300.47    3.35
   1   0 -10  163.39    2.53
   1   0 -10  149.85    2.72
   1   0 -10  156.56    2.71
   1   0 -10  157.59    2.45
   1   0 -10  169.96    2.37
   9   2  -5 1262.04    6.65
   9   2  -5 1215.58    7.03
   9  -2  -5 1224.03    6.87
   9  -2  -5 1211.18    8.09
   9   2  -5 1234.70    7.12
   9  -2  -5 1237.95    6.36
   9   2  -5 1220.35    8.21
   9   2  -5 1198.84    7.52
   7   4  -1  955.06    6.78
   7   4  -1  963.38    5.78
  -7   4   1  946.32    5.61
   7   4  -1  930.55    6.67
   7   4  -1  936.93    7.04
   7   4  -1  932.76    7.34
   7   4  -1  972.14    5.70
   7  -4  -1  986.62    5.66
  -7   4   1  952.92    5.70
   1   1   9  480.46    4.78
   1  -1   9  484.05    3.34
  -1   1  -9  497.45    3.77
  -1  -1  -9  498.02    4.89
  -1   1  -9  483.83    3.90
  -1  -1  -9  487.88    5.22
  -1  -1  -9  481.29    4.27
  -2  -2  -8   88.75    2.24
   2  -2   8   86.67    1.73
   2  -2   8   87.67    1.50
  -2   2  -8   87.31    1.56
  -2   2  -8   82.19    2.28
  -2   2  -8   92.00    2.11
  -2   2  -8   87.15    1.60
   2   2   8   86.82    2.28
  -2  -2  -8   87.86    1.97
   2   2   8   85.43    1.50
  -2  -2  -8   87.60    1.89
   8  -3  -1  772.52    5.09
   8   3  -1  767.09    4.92
   8   3  -1  780.05    5.39
  -8   3   1  788.02    4.85
   8   3  -1  830.08    6.82
   8   3  -1  815.89    6.03
   8   3  -1  801.86    6.08
   8  -3  -6    0.16    0.55
   8   3  -6    0.81    0.68
   8   3  -6    0.75    0.51
   8  -3  -6    0.86    0.82
   8   3  -6    0.72    0.49
   8  -3  -6    0.96    0.60
   8   3  -6    0.78    0.64
  -8   3   6    1.23    0.58
   3  -4  -8    4.27    0.85
   3  -4  -8    5.54    0.73
   3  -4  -8    5.63    0.66
  -3   4   8    5.37    0.73
   3  -4  -8    5.78    0.55
   3   4  -8    4.36    0.49
   3   4  -8    4.78    0.64
   3   4  -8    5.06    0.67
   3   4  -8    5.42    0.67
   1   5  -6  936.98    5.30
   1  -5  -6  951.27    6.03
   1  -5  -6  985.87    6.95
   1  -5  -6  961.79    6.05
   1   5  -6  906.32    5.61
  -1   5   6  942.76    5.60
   1   5  -6  875.90    5.20
  -1   5   6  899.36    7.62
  -4   0  -7    0.18    0.57
   4   0   7    0.64    0.66
  -4   0  -7   -0.03    0.80
   4   0   7    0.92    0.51
  -9   1   1   33.62    1.34
   9  -1  -1   34.42    1.23
   9   1  -1   32.28    1.26
   9   1  -1   32.67    1.22
   9  -1  -1   32.23    1.09
   9  -1  -1   32.92    1.08
   9   1  -1   34.53    1.19
   9   1  -1   34.56    1.43
   9   1  -1   31.77    0.96
   9   1  -1   33.13    1.17
   2   6  -2  277.14    3.27
   2  -6  -2  287.51    3.05
   2  -6  -2  281.93    2.89
  -2  -6   2  284.54    3.12
   2   6  -2  276.76    2.90
  -2   6   2  263.89    2.46
   2   6  -2  273.53    2.70
  -2   6   2  254.80    3.52
  -2   6   2  275.31    3.16
   6  -1 -10 1622.69    8.42
   6  -1 -10 1673.50   10.01
   6   1 -10 1586.73    9.31
   6  -1 -10 1623.84    7.78
   6  -1 -10 1656.58    9.20
   6  -1 -10 1623.02    7.55
   6   1 -10 1660.29    8.99
   6   1 -10 1616.87    8.06
   9  -1  -7   80.18    1.82
   9  -1  -7   82.07    1.82
   9   1  -7   78.06    1.89
   9  -1  -7   83.59    1.89
   9   1  -7   77.88    1.93
   9   1  -7   76.28    2.10
   9  -1  -7   82.59    2.00
   5   3  -9 1048.74    5.89
   5  -3  -9 1048.96    5.90
   5  -3  -9  983.09    6.66
   5   3  -9 1060.94    6.84
   5   3  -9 1060.24    6.28
   5   3  -9 1003.88    4.98
   5   3  -9 1033.23    7.04
   5  -3  -9 1016.19    7.73
   5  -3  -9 1054.87    6.22
   2  -4  -8  627.64    4.68
   2  -4  -8  612.30    5.02
   2  -4  -8  630.37    4.22
  -2   4   8  617.89    4.67
   2   4  -8  615.25    3.99
  -2   4   8  607.93    5.76
   2   4  -8  616.46    4.21
   5  -5  -5  189.36    3.06
   5   5  -5  189.02    2.77
   5   5  -5  193.84    2.13
   5   5  -5  186.85    2.85
  -5   5   5  182.19    2.55
  -5   5   5  191.12    2.78
   5  -5  -5  186.98    2.68
   5  -5  -5  182.63    2.40
   5   5  -5  186.39    2.31
   4  -2 -10   25.71    1.03
   4  -2 -10   27.27    0.93
   4  -2 -10   26.77    0.88
   4   2 -10   26.52    1.19
   4   2 -10   26.73    1.02
   4  -2 -10   27.09    1.39
   4   2 -10   25.67    0.91
   4  -2 -10   26.66    1.06
   4   2 -10   26.21    1.14
   4  -2 -10   21.94    1.19
   4  -4  -8    6.63    0.72
  -4   4   8    7.38    0.82
   4  -4  -8    7.49    0.97
   4   4  -8    7.18    0.74
   4  -4  -8    7.30    0.64
   4   4  -8    7.24    0.70
   4  -4  -8    6.82    0.72
   4   4  -8    7.99    0.53
   4   4  -8    7.52    0.65
  -1   3  -8  375.57    4.35
  -1   3  -8  399.23    3.45
  -1  -3  -8  405.14    4.58
  -1  -3  -8  380.19    3.52
  -1   3  -8  393.74    3.34
   1   3   8  384.81    4.87
   3  -2 -10  987.09    6.81
   3  -2 -10  988.36    6.94
   3   2 -10  988.66    5.98
   3   2 -10  995.28    6.48
   3  -2 -10  983.43    7.26
   3  -2 -10  987.55    6.20
   3   2 -10  991.03    5.27
   6   4  -7 1493.66    7.99
   6   4  -7 1524.11    6.56
   6   4  -7 1477.20    6.21
   6  -4  -7 1504.82    9.52
   6  -4  -7 1488.58    7.70
  -6   4   7 1504.04    8.00
   6   4  -7 1485.57    8.28
   6   4  -7 1539.68    7.13
   6   4  -7 1493.65    8.54
   7   2  -9    2.63    0.59
   7  -2  -9    2.12    0.58
   7   2  -9    1.91    0.65
   7  -2  -9    2.40    0.72
   7  -2  -9    2.24    0.56
  -7   2   9    2.23    0.68
   7   2  -9    1.81    0.77
   7  -2  -9    2.52    0.70
   1   6   2  173.41    2.25
   1   6   2  174.48    3.31
  -1   6  -2  166.25    2.42
  -1   6  -2  182.49    2.49
  -1   6  -2  173.16    2.22
   1  -6   2  183.88    2.38
  -1  -6  -2  175.88    2.42
   6   0   5    0.32    0.69
   6   0   5   -0.17    0.54
  -6   0  -5    0.83    0.77
   6   0   5    0.25    0.48
   8  -2   1   20.16    0.90
   8   2   1   18.46    1.00
   8  -2   1   19.23    0.98
   8   2   1   19.73    0.92
   8  -2   1   20.76    0.78
   8   2   1   20.87    1.19
   8   2   1   21.04    0.98
  -8   2  -1   19.74    1.23
   8  -2   1   19.26    0.84
   8   2  -8  133.08    2.10
  -8   2   8  128.89    2.13
   8   2  -8  132.90    2.12
   8  -2  -8  129.11    2.86
   8  -2  -8  136.48    2.28
   8   2  -8  135.31    2.37
   8  -2  -8  135.64    2.46
   5  -1   6  389.71    3.27
   5  -1   6  392.69    4.05
  -5  -1  -6  388.61    4.47
   5   1   6  391.91    3.36
   5   1   6  408.61    4.57
  -5  -1  -6  403.13    4.53
  -5   1  -6  387.57    4.78
  -5  -1  -6  395.25    3.63
   8   0   2  224.81    2.63
  -8   0  -2  213.21    3.19
   8   0   2  220.67    2.80
   8   0   2  205.48    2.93
   8   0   2  206.55    2.37
   8   0  -9    0.19    0.65
   8   0  -9    0.31    0.71
   8   0  -9    0.17    0.52
   8   0  -9    0.53    0.68
   8   0  -9    0.27    0.79
   1   1 -10  119.47    2.00
   1  -1 -10  119.00    2.31
   1   1 -10  131.03    2.53
   1  -1 -10  131.21    2.42
   1  -1 -10  130.91    2.52
   1   1 -10  126.56    2.12
   1   1 -10  127.56    2.48
   4  -5  -6  187.77    3.08
   4  -5  -6  187.09    2.44
   4   5  -6  189.30    2.24
   4   5  -6  187.71    2.20
   4   5  -6  190.86    2.20
   4   5  -6  184.75    2.52
  -4   5   6  194.58    2.75
  -4   5   6  184.14    2.84
   4  -5  -6  192.67    2.70
   2   6   1   83.20    2.32
   2   6   1   87.72    1.70
  -2   6  -1   83.93    1.82
   2  -6   1   85.18    1.63
  -2   6  -1   80.88    1.50
  -2  -6  -1   86.25    1.77
   1  -6  -3  653.62    4.76
  -1  -6   3  659.46    4.69
   1   6  -3  648.35    4.59
  -1   6   3  625.59    3.98
  -1   6   3  667.62    4.81
   1   6  -3  660.81    4.63
   1  -6  -3  641.98    4.28
  -1   6   3  634.70    6.02
   1   6  -3  633.96    4.40
   9   2  -2    1.95    0.61
   9   2  -2    1.83    0.54
   9  -2  -2    2.47    0.63
   9  -2  -2    1.08    0.44
   9   2  -2    1.88    0.47
   9   2  -2    1.29    0.63
   9   2  -2    1.30    0.69
   4   1   7    3.49    0.87
  -4   1  -7    0.60    0.87
  -4  -1  -7    1.34    0.78
   4  -1   7    1.28    0.52
  -4   1  -7    0.54    0.63
   4  -1   7    0.89    0.63
  -4  -1  -7    1.10    0.65
  -4   1  -7    0.75    0.54
   4   1   7    0.80    0.51
  -4  -1  -7    1.44    0.51
   1   4   7    1.51    0.93
  -1  -4  -7    1.21    0.61
  -1   4  -7    1.28    0.65
  -1   4  -7    0.97    0.56
  -1   4  -7    1.57    0.56
  -1   4  -7    1.09    0.64
   9   2  -6  264.85    3.28
   9   2  -6  252.30    2.84
   9  -2  -6  270.39    2.74
   9   2  -6  239.96    3.02
   9  -2  -6  226.97    3.54
   9   2  -6  254.21    3.31
   9   2  -6  253.05    3.65
   9  -2  -6  251.96    3.04
   7  -3  -8  542.37    5.79
   7   3  -8  544.58    4.67
   7   3  -8  519.67    5.21
   7  -3  -8  539.03    4.77
   7   3  -8  546.42    4.21
   7   3  -8  548.97    4.91
   7   3  -8  554.43    3.84
  -7   3   8  524.65    4.50
   7  -3  -8  545.82    4.61
   7  -3  -8  551.02    4.68
  -3   0  -8  741.63    6.53
   3   0   8  733.26    4.49
  -7   2  -3  230.56    3.55
   7   2   3  222.66    3.49
   7  -2   3  229.08    2.42
   7   2   3  222.52    2.89
   5   2 -10  495.08    4.22
   5  -2 -10  506.30    4.83
   5  -2 -10  477.89    5.21
   5   2 -10  485.82    3.34
   5   2 -10  499.60    3.68
   5  -2 -10  494.40    3.80
   5  -2 -10  487.97    3.78
   5   2 -10  501.40    4.10
   5   2 -10  491.39    4.80
   5  -2 -10  515.10    3.93
  -2   6   3 1575.26    8.08
   2   6  -3 1584.46    7.52
   2   6  -3 1547.12    7.52
   2  -6  -3 1570.40    7.80
  -2   6   3 1544.29    9.17
  -2  -6   3 1539.45    7.85
   2   6  -3 1561.88    7.19
  -5   5  -1  134.82    2.44
  -5   5  -1  134.24    1.96
  -5   5  -1  136.08    2.15
  -5   5  -1  141.55    2.21
   5   5   1  138.24    3.10
   5   5   1  134.64    2.18
   5   5   1  137.61    2.55
   1   3  -9  447.68    4.35
   1   3  -9  451.10    3.82
  -1   3   9  447.88    3.78
   1  -3  -9  450.80    3.90
   1  -3  -9  445.75    4.44
   1  -3  -9  452.70    4.73
   1  -3  -9  440.72    3.74
   0  -6  -3    0.01    0.36
   0   6   3    0.11    0.47
   0  -6   3   -0.02    0.40
   0  -6  -3    0.08    0.50
   0   6  -3    0.13    0.50
   0   6  -3   -0.11    0.52
   0   6  -3    0.38    0.46
   0   6   3    0.55    0.46
   0   6   3    0.44    0.86
   6   4   2  157.10    2.32
   6   4   2  153.53    2.52
  -6   4  -2  149.40    2.13
  -6   4  -2  156.79    2.27
   6   4   2  152.99    2.49
   6  -4   2  154.08    2.13
  -6   4  -2  150.52    2.76
   3   6  -1  283.60    3.05
   3   6  -1  273.95    3.55
   3  -6  -1  281.43    2.90
  -3   6   1  268.63    2.48
  -3   6   1  274.35    3.38
   3   6  -1  270.10    3.61
   3  -6  -1  270.94    2.76
   0   5   6  278.39    4.30
   0  -5  -6  284.62    3.29
   0  -5  -6  287.01    3.69
   0   5  -6  288.22    2.83
   0   5  -6  287.31    3.05
  -6  -1  -5  421.70    3.73
   6   1   5  421.40    4.70
   6   1   5  426.89    3.94
   6  -1   5  414.26    3.40
  -6   1  -5  409.81    4.91
   6   1   5  416.34    3.56
   7   3   2  130.88    2.22
   7  -3   2  129.90    1.77
  -7   3  -2  136.27    2.12
   7   3   2  129.52    2.17
   7   3   2  137.38    2.86
   7  -3   2  131.98    2.00
   7   4  -6   98.19    2.25
   7   4  -6   89.30    2.13
   7   4  -6   89.91    1.90
  -7   4   6   98.42    1.96
   7   4  -6   95.61    1.48
   7  -4  -6   93.49    2.32
   7   4  -6  101.97    2.18
   7  -4  -6   95.76    1.83
   7  -4  -6   94.96    2.00
   3   6  -2  454.43    4.21
   3  -6  -2  496.12    3.85
   3   6  -2  496.81    4.68
  -3  -6   2  450.06    4.20
   3  -6  -2  471.01    3.90
   3  -6  -2  473.67    3.77
   3   6  -2  460.09    3.86
  -3   6   2  450.78    4.40
  -3   6   2  458.78    4.17
   2   2 -10  546.08    4.35
   2  -2 -10  530.20    5.28
   2   2 -10  540.65    4.74
   2   2 -10  532.93    3.85
   2  -2 -10  539.17    5.21
   1  -4  -8   67.98    1.74
   1  -4  -8   67.67    1.37
   1  -4  -8   68.76    2.02
  -1   4   8   66.02    1.47
   1  -4  -8   64.53    1.55
   1   4  -8   66.85    1.54
   1   4  -8   65.63    1.35
  -1   4   8   66.67    2.10
   9   0   0   15.31    0.81
  -9   0   0   14.76    0.98
   9   0   0   15.44    0.73
   9   0   0   14.97    0.93
   9   0   0   15.83    0.92
  -6   5   3  463.60    4.24
   6  -5  -3  447.62    4.05
   6  -5  -3  478.84    3.80
  -6   5   3  444.05    3.89
   6   5  -3  464.00    4.86
   6   5  -3  447.67    3.82
   8   1   2 1955.20    8.87
   8  -1   2 1938.77    7.86
   8  -1   2 1976.68    8.60
   8   1   2 1980.65    9.39
   8  -1   2 1932.69    8.93
   8  -1   2 1952.43    9.35
   8   1   2 1998.61   10.41
  -8   1  -2 1953.06   10.56
   8   1   2 1928.02    8.34
   8  -1  -9   11.50    0.80
   8   1  -9   10.60    1.00
   8   1  -9   10.35    1.05
   8   1  -9   10.65    0.88
  -8   1   9   10.99    0.81
   8  -1  -9    9.98    0.85
   8  -1  -9   11.49    0.93
   8  -1  -9   10.76    1.12
   8  -1  -9    8.81    0.93
   8   1  -9   10.60    0.83
   6  -5  -2  114.66    1.83
   6  -5  -2  116.44    2.01
  -6   5   2  125.55    2.02
   6  -5  -2  120.50    1.91
   6   5  -2  121.26    2.42
   6   5  -2  133.74    2.56
   6   5  -2  120.22    2.04
   6   5  -2  128.77    2.71
  -6   5   2  124.56    2.17
   7   0 -10   67.51    1.52
   7   0 -10   71.69    1.66
   7   0 -10   67.94    1.94
   7   0 -10   66.79    1.97
   7   0 -10   70.25    1.81
   7   4   0    5.24    0.81
   7  -4   0    5.29    0.48
  -7   4   0    5.53    0.65
  -7   4   0    4.93    0.60
  -7   4   0    5.96    0.85
   7  -4   0    5.60    0.57
   7   4   0    5.56    0.71
   7   4   0    5.35    0.64
   7   4   0    5.12    1.01
   7   4   0    5.80    0.95
   7   4   0    5.79    0.74
   5   4  -8   12.67    0.68
   5  -4  -8   11.96    1.11
   5  -4  -8   12.86    0.85
   5  -4  -8   13.47    0.86
   5   4  -8   12.17    0.87
   5   4  -8   13.65    0.83
   5   4  -8   13.97    0.77
   5   4  -8   12.41    0.89
  -3  -5  -4  121.63    2.26
  -3   5  -4  124.40    1.94
  -3   5  -4  124.37    1.82
   3   5   4  122.87    2.04
  -3   5  -4  124.41    1.90
  -3   5  -4  120.29    2.07
   3  -5   4  118.81    1.78
  -3   5  -4  124.12    2.31
  -4   3  -6    3.49    0.53
   4   3   6    4.12    1.01
   4  -3   6    3.04    0.61
   4   3   6    3.34    0.61
  -4  -3  -6    3.08    0.74
  -4   3  -6    3.18    0.59
  -4  -3  -6    2.52    0.63
  -4   3  -6    2.67    0.90
   9   0  -8 1198.00    7.96
   9   0  -8 1218.17    8.22
   3  -1   8  439.14    3.43
  -3  -1  -8  478.71    5.26
   3   1   8  457.10    4.91
  -3   1  -8  479.21    5.33
  -3  -1  -8  495.48    4.18
   3  -1   8  468.90    4.31
   3   1   8  478.84    3.61
  -3   1  -8  500.11    4.04
  -3   1  -8  490.43    5.15
  -3  -1  -8  486.92    5.04
   3   6   0  926.49    7.21
  -3   6   0  929.01    4.99
  -3  -6   0  916.83    6.12
   8   3   0  685.84    4.74
  -8   3   0  717.59    4.82
   8  -3   0  711.29    3.96
   8   3   0  738.21    6.75
   8  -3   0  697.20    4.83
   8   3   0  697.54    5.47
   8   3   0  684.43    6.01
  -8   3   0  662.65    5.85
   8   3   0  694.63    5.12
   8   3   0  741.77    5.72
  -8   3   7  392.14    3.74
   8   3  -7  398.88    4.18
   8   3  -7  401.53    4.18
   8  -3  -7  392.66    4.79
   8   3  -7  404.66    3.49
   8   3  -7  386.76    4.50
   8  -3  -7  381.06    3.74
  -5  -3  -5 1084.82    6.86
   5   3   5 1102.79    8.59
  -5   3  -5 1062.87    7.96
   5   3   5 1094.49    6.13
   5  -3   5 1051.12    6.19
   6  -3  -9  502.41    4.09
   6  -3  -9  522.38    4.71
  -6   3   9  508.79    4.49
   6   3  -9  517.20    5.00
   6   3  -9  522.57    4.22
   6   3  -9  524.06    4.81
   6   3  -9  512.14    3.90
   6  -3  -9  503.59    5.57
   6  -3  -9  525.49    4.32
   6  -5  -4  793.06    5.61
   6  -5  -4  869.51    5.10
  -6   5   4  794.02    5.34
  -6  -5   4  734.47    5.70
  -6   5   4  776.57    5.64
   6   5  -4  821.73    6.37
   6   5  -4  767.18    6.27
   6  -5  -4  869.64    5.83
   6   5  -4  793.35    5.06
   7   0   4  955.46    5.87
  -7   0  -4  944.04    7.20
  -2   5  -5  372.67    3.37
   2   5   5  364.83    5.21
  -2   5  -5  364.25    3.17
  -2   5  -5  364.36    3.17
   2   5   5  371.50    3.32
  -2  -5  -5  368.42    3.98
   3  -6  -3  924.14    5.72
  -3   6   3  892.35    6.58
  -3   6   3  947.38    6.28
   3  -6  -3  938.04    5.59
   3  -6  -3  944.42    5.38
   3   6  -3  944.75    5.03
   3   6  -3  896.15    6.29
  -3  -6   3  952.50    6.11
   4   5   3   89.97    2.67
   4  -5   3   91.04    1.62
  -4   5  -3   93.51    1.51
  -4   5  -3   88.99    1.73
   4   5   3   88.84    1.80
  -4  -5  -3   88.88    1.99
  -4   5  -3   92.34    2.05
  -4   5  -3   90.61    1.82
   9  -1   0  494.39    4.17
   9   1   0  514.77    5.01
   9  -1   0  495.45    4.29
   9   1   0  504.43    4.44
   9  -1   0  507.21    4.14
  -9   1   0  506.82    4.94
   9   1   0  488.59    3.68
   9   1   0  527.13    4.58
   9   1   0  501.27    4.62
   9  -1   0  505.07    3.44
   6   5  -1    0.19    0.76
   6   5  -1    0.58    0.68
  -6   5   1    0.51    0.61
  -6   5   1    0.07    0.54
   6   5  -1    0.04    0.52
   6   5  -1    0.15    0.56
   6   5  -1    0.49    0.70
  -2  -6  -2  456.90    3.98
   2   6   2  459.83    3.83
   2  -6   2  477.57    3.91
  -2   6  -2  454.40    3.92
  -2   6  -2  468.00    3.60
  -2  -6  -2  484.16    4.09
   2   6   2  473.23    5.56
  -1  -2  -9  112.30    2.18
  -1  -2  -9  114.13    2.57
  -1   2  -9  115.14    1.86
  -1   2  -9  110.34    1.83
   1   2   9  107.99    2.51
   1  -2   9  111.27    1.64
  -1  -2  -9  114.60    2.18
   7   1 -10  698.78    5.46
   7   1 -10  695.81    5.02
   7  -1 -10  701.09    4.92
   7  -1 -10  688.86    5.95
   7  -1 -10  720.38    6.45
   7   1 -10  691.38    4.97
   7  -1 -10  708.38    5.36
   7  -1 -10  734.48    5.14
   7   1 -10  720.85    5.74
  -9   2   1    8.32    0.91
   9  -2  -1    7.93    0.74
   9   2  -1    7.96    0.79
   9   2  -1    7.86    0.82
   9   2  -1    7.37    1.03
   9  -2  -1    8.26    0.65
   9   2  -1    7.46    0.69
   9   2  -1    9.55    0.70
   9  -2  -1    8.11    0.68
   0   0 -10    5.76    0.70
   0   0 -10    5.38    0.88
   0   0 -10    6.94    0.91
   0   0 -10    5.77    0.67
  -3  -3  -7   63.39    1.71
   3   3   7   63.04    2.23
  -3   3  -7   60.96    1.99
   3  -3   7   62.11    1.46
  -3   3  -7   66.37    1.40
   3   3   7   64.60    1.42
  -3   3  -7   65.46    1.41
  -3  -3  -7   66.06    1.95
   1  -6   3  567.45    4.25
   1   6   3  557.74    4.10
  -1   6  -3  560.09    4.02
  -1   6  -3  554.86    4.17
   6  -2 -10 1222.71    7.72
   6   2 -10 1150.05    7.64
   6  -2 -10 1184.84    8.64
   6  -2 -10 1209.30    6.43
  -6   2  10 1149.55    7.08
   6  -2 -10 1177.29    6.36
   6   2 -10 1186.47    6.56
   6  -2 -10 1243.75    6.56
   5  -5  -6  292.68    3.90
   5  -5  -6  295.53    3.08
   5   5  -6  305.37    3.52
   5   5  -6  294.88    3.38
  -5   5   6  291.79    3.22
   5   5  -6  295.53    2.61
   5   5  -6  285.30    2.74
   5   5  -6  297.67    2.62
   5  -5  -6  292.91    3.37
  -4  -4  -5  758.92    5.82
  -4   4  -5  775.10    4.97
   4   4   5  779.63    7.48
  -4   4  -5  761.77    4.46
  -4   4  -5  751.07    6.43
   4   4   5  760.39    5.06
  -4   4  -5  759.65    4.95
   9  -1  -8  493.37    4.86
   9   1  -8  496.71    4.75
   9   1  -8  495.80    4.50
   9  -1  -8  477.26    4.33
   9   1  -8  491.95    5.26
   9   1  -8  494.76    4.66
   9   1  -8  501.03    4.22
  -9   2   7  244.96    2.77
   9   2  -7  229.34    3.65
   9  -2  -7  233.02    3.01
   9  -2  -7  232.31    3.80
   9  -2  -7  236.13    3.31
   9   2  -7  240.08    2.91
  10   0  -4   98.22    1.87
  10   0  -4   95.48    2.12
  10   0  -4   97.22    2.08
  10   0  -4  101.14    2.01
  -1   6   4  370.29    4.66
   1   6  -4  367.46    3.08
  -1  -6   4  339.75    3.29
   1   6  -4  352.24    3.36
   1   6  -4  356.81    3.39
   1   6  -4  371.33    3.31
   1  -6  -4  355.57    3.53
  -1   6   4  370.31    3.52
  10   0  -5   -0.06    0.64
  10   0  -5    0.22    0.64
  10   0  -5    0.39    0.59
  10   0  -5    0.14    0.44
  -2  -6   4  110.57    1.92
  -2   6   4  104.42    1.96
   2   6  -4  105.84    1.78
   2  -6  -4  107.88    1.97
  -2   6   4  108.38    2.48
  -3   4  -6  874.09    5.19
  -3  -4  -6  877.52    6.39
   3   4   6  847.02    7.98
  -3   4  -6  870.43    4.94
  -3   4  -6  843.28    6.73
   3   4   6  846.91    5.27
  -3   4  -6  879.00    5.31
  -2   0  -9   -0.15    0.44
  -2   0  -9    0.31    0.53
   2   0   9    0.18    0.43
   2   0   9    0.13    0.62
  -2   0  -9    0.04    0.80
  -2   0  -9    0.87    0.63
   7  -1   4  392.78    3.29
  -7   1  -4  387.13    4.72
   7  -1   4  388.11    3.52
   7  -1   4  395.85    4.21
  -7  -1  -4  394.52    3.55
  -7  -1  -4  387.76    4.33
   7   1   4  397.49    3.79
   4   0 -11    0.13    0.62
   4   0 -11    0.22    0.65
   4   0 -11    0.01    0.63
   4   0 -11   -0.01    0.39
   4   0 -11    0.17    0.56
   3   6   1    5.48    0.68
   3  -6   1    4.96    0.52
  -3  -6  -1    4.97    0.67
  -3  -6  -1    5.77    0.65
  -3   6  -1    5.46    0.59
  -3   6  -1    5.46    0.78
   3   6   1    6.45    1.07
  -3   6  -1    4.66    0.64
  -5   2  -6  108.75    2.65
   5   2   6  106.37    1.84
   5   2   6  103.16    2.57
  -5  -2  -6  112.17    2.12
   5  -2   6  109.87    2.05
   5  -2   6  109.93    1.76
  -5   2  -6  110.24    2.34
  -5  -2  -6  109.04    2.47
   6  -3   4  290.42    2.77
   6  -3   4  284.41    3.16
  -6  -3  -4  285.95    3.47
   6   3   4  289.38    3.09
   6   3   4  282.19    4.31
  -3   5   7   19.89    1.05
  -3   5   7   18.41    1.13
   3   5  -7   20.16    0.82
   3  -5  -7   20.32    1.05
   3  -5  -7   20.62    1.23
   3  -5  -7   22.22    0.96
   3  -5  -7   20.49    0.97
   3   5  -7   19.58    0.89
   3   5  -7   19.95    0.91
   1  -2 -10   14.40    1.04
   1   2 -10   14.68    1.02
   1  -2 -10   13.74    1.13
   1   2 -10   13.62    0.87
   1  -2 -10   14.27    0.94
  -2   5   7    1.69    0.76
  -2   5   7    1.18    0.60
   2  -5  -7    0.72    0.50
   2  -5  -7    0.72    0.73
   2  -5  -7    2.67    0.60
   2   5  -7    1.17    0.49
   2   5  -7    1.45    0.59
   2   5  -7    1.63    0.63
  -5   4  -4  128.76    2.07
  -5  -4  -4  130.83    2.41
  -5   4  -4  133.20    2.00
   5   4   4  135.04    2.14
  -4  -2  -7  803.97    5.93
   4   2   7  846.92    7.16
   4  -2   7  829.42    4.92
   4  -2   7  830.64    5.74
  -4   2  -7  802.92    4.82
   4   2   7  816.31    5.03
  -4  -2  -7  826.24    5.76
   0   1 -10  623.51    4.60
   0   1 -10  624.95    4.46
   0  -1 -10  627.15    5.11
   0  -1 -10  624.51    5.42
   6   5  -5   17.92    1.08
   6   5  -5   17.38    1.11
   6  -5  -5   19.99    1.04
   6   5  -5   16.36    0.67
  -6   5   5   17.85    1.07
  -6   5   5   18.14    0.89
   6  -5  -5   16.52    0.98
   6   5  -5   17.90    0.84
  10   0  -3    0.40    0.55
  10   0  -3    0.11    0.74
 -10   0   3    0.23    0.57
   0  -3  -9    2.06    0.54
   0  -3  -9    1.38    0.68
   0  -3  -9    1.71    0.52
   0   3  -9    2.01    0.62
   0   3  -9    1.90    0.69
   0   3   9    2.34    0.84
   0   3  -9    2.09    0.71
   0  -4  -8  373.40    4.40
   0  -4  -8  375.20    3.97
   0   4   8  355.82    4.76
   0  -4  -8  363.53    2.99
   0   4  -8  370.88    3.81
   0   4  -8  372.18    3.54
   0   4  -8  351.47    3.28
   5   0 -11   -0.10    0.65
   5   0 -11    0.50    0.56
   5   0 -11    0.72    0.69
   3   0 -11    0.12    0.55
   3   0 -11   -0.14    0.57
   3   0 -11    0.18    0.58
   3   0 -11    0.13    0.54
  -1   5  -6  163.56    2.17
  -1  -5  -6  164.59    2.85
   1   5   6  162.59    3.51
  -1   5  -6  161.31    2.37
  -1   5  -6  161.92    1.96
  -1  -5  -6  167.57    2.61
  10   1  -4  260.12    3.25
  10  -1  -4  270.45    3.47
  10  -1  -4  265.53    3.14
  10   1  -4  268.64    3.34
  10   1  -4  271.98    3.58
  10   0  -6   97.44    2.16
  10   0  -6   98.01    2.02
  10   0  -6   93.47    2.05
   0   6  -4  100.55    1.83
   0   6  -4   97.76    1.84
   0   6   4   94.83    1.56
   0   6  -4  102.22    1.73
   0   6  -4   98.82    1.63
   0   6   4  101.61    1.70
   0  -6  -4   95.83    1.90
   0   6   4   94.59    2.60
  -5   5  -2 1020.91    6.95
   5   5   2 1032.47    8.52
   5   5   2  996.10    6.99
   5   5   2 1068.77    6.32
  -5   5  -2  962.53    6.14
   9   3  -4   87.35    1.73
   9   3  -4   82.68    2.19
   9   3  -4   86.96    2.07
   9  -3  -4   85.41    1.71
   9   3  -4   83.56    1.42
   9  -3  -4   82.08    1.99
   9   3  -4   83.33    1.97
  10  -1  -5   47.21    1.66
  10  -1  -5   49.36    1.46
  10   1  -5   50.23    1.67
  10   1  -5   47.20    1.50
  10   1  -5   49.63    1.57
  10   1  -5   48.18    1.62
  -8   4   3  341.03    3.39
   8   4  -3  325.48    3.10
  -8   4   3  325.69    3.05
   8  -4  -3  322.09    3.13
   8   4  -3  338.72    3.14
   8   4  -3  324.49    4.10
   8  -4  -4   82.11    1.99
   8   4  -4   80.35    1.86
   8   4  -4   85.65    2.20
   8  -4  -4   84.01    1.66
   8  -4  -4   83.84    1.83
  -8   4   4   85.82    1.54
  -8   4   4   81.56    1.73
   8   4  -4   83.08    1.53
   4   6  -2 1189.15    7.03
   4   6  -2 1205.54    7.78
  -4   6   2 1132.41    7.02
   4  -6  -2 1187.76    6.22
  -4   6   2 1134.71    7.04
   4  -6  -2 1206.10    6.49
  -3   6   4  328.48    3.93
   3   6  -4  349.20    2.99
   3  -6  -4  333.00    3.33
  -3   6   4  346.40    3.70
   3  -6  -4  343.85    3.54
   7   4  -7  186.54    3.07
   7  -4  -7  172.50    2.68
  -7   4   7  185.33    2.68
   7  -4  -7  162.04    3.12
   7  -4  -7  184.96    2.52
   7   4  -7  179.96    2.66
   7   4  -7  177.17    2.80
   7   4  -7  195.37    2.29
  -6   5   0 1276.40    6.99
   6   5   0 1284.48    7.98
  -6   5   0 1301.99    6.90
  -6   5   0 1264.04    7.72
   6   5   0 1287.55    8.87
   2   1   9    7.89    0.92
  -2  -1  -9    8.17    0.93
   2  -1   9    8.53    0.62
   2   1   9    8.25    0.60
  -2   1  -9    8.04    1.10
  -2  -1  -9    7.41    0.74
  -2   1  -9    8.91    0.94
   6   4  -8   23.14    1.13
   6   4  -8   23.50    0.98
   6  -4  -8   22.54    1.10
  -6   4   8   22.21    1.14
   6  -4  -8   21.96    1.39
   6   4  -8   22.83    1.12
   6   4  -8   22.87    1.06
   6   4  -8   21.66    0.85
   4  -1 -11  212.27    3.32
   4   1 -11  198.49    2.64
   4   1 -11  220.98    2.86
   4   1 -11  230.85    2.91
   4   1 -11  226.86    3.17
   4   1 -11  213.75    2.77
   4  -1 -11  227.51    2.61
   4  -1 -11  205.78    2.73
   4   6  -1   49.88    1.40
   4   6  -1   46.84    1.60
  -4   6   1   47.08    1.46
   4  -6  -1   44.68    1.13
  -4   6   1   45.10    1.41
  -6  -2  -5  313.73    3.42
   6   2   5  308.79    4.32
   6  -2   5  297.37    3.42
  -6   2  -5  303.31    4.29
   6   2   5  315.39    3.14
   9  -3  -3  118.92    2.23
   9  -3  -3  115.99    1.91
   9   3  -3  113.73    2.35
   9   3  -3  116.89    2.03
   9   3  -3  111.53    1.72
   9   3  -3  114.14    2.56
   4   5  -7  483.26    3.76
  -4   5   7  448.05    4.18
   4  -5  -7  442.90    4.82
   4  -5  -7  466.49    4.22
   4   5  -7  460.20    3.44
   4   5  -7  453.32    3.57
   4   5  -7  462.49    3.44
  -4   5   7  440.33    4.30
   8   2   2  625.80    4.98
   8  -2   2  611.17    4.77
   8   2   2  616.40    5.82
   8  -2   2  614.38    3.98
   8   2   2  609.35    4.47
   8   2  -9   40.79    1.31
   8  -2  -9   37.31    1.27
  -8   2   9   37.53    1.24
   8   2  -9   37.37    1.33
   8  -2  -9   38.85    1.43
   8  -2  -9   40.31    1.33
   8  -2  -9   39.56    1.25
   8   2  -9   35.58    1.41
   9   3  -5  118.30    2.41
   9  -3  -5  115.21    2.04
   9   3  -5  118.81    1.94
   9   3  -5  115.66    2.28
   9   3  -5  118.69    2.63
   9  -3  -5  113.89    2.50
  -2   3  -8   93.07    1.72
  -2   3  -8   90.71    2.31
  -2   3  -8   97.43    1.69
   2   3   8   89.09    2.45
  -2  -3  -8   85.46    1.95
  -7   4  -1   78.42    2.05
   7   4   1   78.59    1.86
   7   4   1   79.66    1.72
  -7   4  -1   78.90    1.71
   7  -4   1   77.96    1.33
   7   4   1   78.20    2.34
   1  -5  -7    0.84    0.55
   1  -5  -7    0.82    0.47
  -1   5   7    1.34    0.86
  -1   5   7    0.61    0.48
   1   5  -7    0.75    0.48
   1   5  -7    0.85    0.64
   1  -5  -7    1.51    0.77
  -2   4  -7    2.76    0.69
  -2   4  -7    1.47    0.62
  -2   4  -7    1.73    0.77
  -2  -4  -7    1.95    0.73
   2   4   7    1.22    0.97
   2   4   7    1.50    0.47
  10  -1  -3  143.15    2.27
  10  -1  -3  145.02    2.52
  10   1  -3  147.08    2.47
  10   1  -3  142.72    2.56
   4  -6  -3   26.73    1.01
  -4   6   3   29.66    1.21
   4   6  -3   31.81    1.32
   4  -6  -3   29.80    1.13
   5   1 -11  141.54    2.25
   5  -1 -11  172.27    2.35
   5   1 -11  165.19    2.27
   5  -1 -11  157.15    2.56
   5  -1 -11  151.73    2.75
   5   1 -11  160.46    2.79
   5  -1 -11  168.28    3.06
   5   1 -11  163.39    2.43
   3  -1 -11   50.74    1.61
   3   1 -11   51.26    1.45
   3   1 -11   49.42    1.49
   3  -1 -11   51.58    1.70
   3   1 -11   52.38    1.51
   3   1 -11   52.12    1.52
   3  -1 -11   56.82    1.62
   3   1 -11   50.23    1.47
  -3  -2  -8  342.71    3.84
   3  -2   8  356.29    3.05
   3   2   8  323.37    4.52
  -3  -2  -8  343.76    3.65
   3   2   8  342.91    3.10
  -3   2  -8  365.65    3.28
   3  -2   8  361.28    3.80
  -8   4   2 1037.95    5.85
  -8   4   2 1031.58    5.95
   8   4  -2 1062.29    6.06
   8   4  -2 1069.03    7.33
   8   4  -2 1023.19    5.92
   8  -4  -5  533.57    5.25
   8  -4  -5  533.30    4.39
   8   4  -5  561.72    4.72
   8   4  -5  565.77    3.79
   8   4  -5  572.63    5.47
  -8   4   5  576.65    4.57
   8  -4  -5  568.35    4.78
  10   1  -6  251.31    3.50
  10   1  -6  258.52    3.42
  10   1  -6  247.62    3.21
  10  -1  -6  237.81    3.10
  10  -1  -6  235.44    3.57
  10   1  -6  237.75    3.32
  10  -1  -6  244.81    3.14
   9   0   1   -0.11    0.56
   9   0   1   -0.39    0.65
  -9   0  -1   -0.07    0.64
   4   3 -10    2.88    0.68
   4  -3 -10    2.36    0.46
  -4   3  10    2.03    0.70
   4  -3 -10    2.63    0.70
   4  -3 -10    2.37    0.55
   4   3 -10    2.36    0.60
   4   3 -10    2.66    0.62
   4   3 -10    2.43    0.66
   3  -3 -10  163.07    2.27
   3  -3 -10  161.59    2.30
   3   3 -10  161.43    2.15
   3   3 -10  159.50    2.09
   3   3 -10  162.66    2.38
  -3   3  10  157.10    2.45
   3  -3 -10  159.77    2.80
 -10   0   2  767.83    5.73
  10   0  -2  778.64    5.35
   6   0 -11    0.09    0.67
   6   0 -11    0.07    0.63
   6   0 -11   -0.25    0.66
   2   6   3    4.84    0.64
  -2   6  -3    3.76    0.59
  -2   6  -3    3.68    0.70
  -2   6  -3    3.47    0.55
  -2   6  -3    3.57    0.67
   2   6   3    3.33    1.07
  -2  -6  -3    3.81    0.63
   7  -3  -9    0.61    0.97
   7  -3  -9    0.54    0.58
   7  -3  -9    0.67    0.57
  -7   3   9    0.77    0.71
   7  -3  -9    0.72    0.57
   7   3  -9    0.67    0.63
   7  -3  -9    0.97    0.56
   7   3  -9    0.50    0.69
   7   3  -9    0.63    0.50
   7   3  -9    0.66    0.53
   7   3  -9    0.54    0.72
   2   0 -11    0.21    0.60
   2   0 -11    0.01    0.48
   2   0 -11   -0.12    0.54
   8   3   1   23.65    1.36
   8   3   1   22.86    1.06
   8   3   1   23.16    1.05
   8  -3   1   22.33    0.80
   8  -3   1   23.70    1.03
  -8   3  -1   25.81    1.39
   8   3  -8   76.55    2.10
   8   3  -8   80.81    1.64
   8   3  -8   78.58    1.86
  -8   3   8   77.27    1.74
   8  -3  -8   80.42    1.76
   8  -3  -8   80.67    1.82
   8  -3  -8   75.24    2.31
   8   3  -8   79.52    1.94
  -4   6   0  774.30    5.31
   4   6   0  754.67    6.25
   4   6   0  779.89    5.26
  -4   6   0  766.19    5.41
  -4   6   0  765.98    4.45
  -8   0  -3    0.07    0.72
   8   0   3    0.40    0.55
   8   0   3    0.23    0.71
   8   0   3   -0.05    0.57
   8   0 -10  202.09    3.30
   8   0 -10  214.44    2.80
   8   0 -10  212.02    3.42
   8   0 -10  204.24    2.73
   8   0 -10  210.06    3.01
   6   4   3  299.88    3.26
  -6   4  -3  286.00    3.12
  -6   4  -3  294.70    3.96
   6   4   3  292.10    3.42
  -6   4  -3  296.61    2.89
   6   4   3  307.44    4.60
   9   2   0   50.10    1.30
   9  -2   0   50.43    1.05
  -9   2   0   55.06    1.79
   9  -2   0   50.56    1.38
   9   2   0   52.48    1.66
   9  -2   0   50.36    1.36
   3   4  -9   27.49    1.03
   3   4  -9   25.94    1.00
   3   4  -9   24.94    1.09
  -3   4   9   27.97    1.16
   3  -4  -9   25.83    1.44
   3  -4  -9   27.58    1.01
   3  -4  -9   25.93    1.07
   3  -4  -9   25.01    1.15
   3   4  -9   27.41    0.85
   7   2 -10   51.53    1.66
   7  -2 -10   56.20    2.04
   7  -2 -10   60.96    1.45
   7   2 -10   62.93    1.52
   7  -2 -10   63.55    1.85
   7   2 -10   60.08    1.90
   7  -2 -10   68.47    1.62
  -7   2  10   62.22    1.63
   7  -2 -10   64.39    1.46
   9  -3  -2  721.17    5.17
  -9   3   2  720.95    4.59
   9   3  -2  711.12    5.16
   9   0  -9    0.08    0.69
   9   0  -9   -0.56    0.76
   9   0  -9    0.89    0.60
   9   0  -9    0.04    0.75
   9   0  -9   -0.01    0.76
  -3   6  -2   34.77    1.05
   3   6   2   37.28    1.22
  -3   6  -2   37.04    1.12
  -3   6  -2   35.99    1.16
  -3  -6  -2   35.96    1.27
  -3   6  -2   34.61    1.30
   3   6   2   36.78    1.78
   4  -4  -9   69.54    1.75
   4   4  -9   74.53    1.56
   4   4  -9   69.53    1.38
   4   4  -9   75.87    1.71
   4  -4  -9   66.90    2.11
   4  -4  -9   72.06    1.65
  -4   4   9   71.57    1.76
   4   4  -9   72.27    1.70
  10   0  -7    0.90    0.69
  10   0  -7    0.15    0.65
  10   0  -7    0.01    0.70
  10   0  -7    0.12    0.65
  10   0  -7    0.06    0.65
   9  -3  -6    0.90    0.77
   9  -3  -6    1.08    0.58
   9   3  -6    1.33    0.67
   9   3  -6    1.12    0.45
   9   3  -6    1.77    0.43
  -9   3   6    0.95    0.51
   9   3  -6    1.32    0.93
   9  -2  -8    0.03    0.60
   9   2  -8   -0.02    0.68
   9  -2  -8    0.07    0.62
   9   2  -8    0.24    0.88
   9   2  -8    0.11    0.68
  -9   2   8    0.58    0.53
   9  -2  -8   -0.15    0.89
   9   2  -8    0.65    0.64
   9   2  -8   -0.09    0.46
   9  -2  -8    0.19    0.75
   7   3   3  372.64    4.79
   7   3   3  369.63    3.53
   7  -3   3  382.78    3.11
   5  -3 -10   41.80    1.16
   5  -3 -10   43.14    1.50
   5  -3 -10   37.33    1.69
   5   3 -10   41.73    1.26
   5  -3 -10   42.89    1.28
   5   3 -10   41.12    1.02
   5   3 -10   43.40    1.50
   5   3 -10   40.93    1.34
   5   3 -10   42.95    1.50
   1   6   4  338.94    4.86
   1   6   4  357.53    3.15
  -1  -6  -4  349.31    3.58
  -1   6  -4  345.99    3.19
  -1   6  -4  349.90    3.09
   6  -5  -6  287.99    3.92
   6   5  -6  283.22    3.55
   6   5  -6  289.37    3.52
   6   5  -6  288.20    2.72
   6   5  -6  275.91    2.36
  -6   5   6  299.44    3.43
  -6   5   6  291.97    3.02
   6  -5  -6  290.47    3.32
   9   1   1  692.83    5.77
   9  -1   1  711.75    5.46
   9  -1   1  709.52    4.31
   9  -1   1  697.89    5.07
  -9   1  -1  698.90    5.96
   9   1   1  706.36    5.32
   9   1   1  681.18    4.56
  -2   6   5   41.26    1.31
   2   6  -5   37.43    1.14
   2   6  -5   41.13    1.18
   2  -6  -5   42.22    1.35
   2  -6  -5   40.01    1.25
  -2   6   5   40.61    1.61
   2   6  -5   39.16    1.20
   4  -6  -4    2.70    0.59
   4  -6  -4    2.58    0.58
   4   6  -4    2.28    0.66
  -4   6   4    2.56    0.70
   4   6  -4    2.60    0.62
  10   1  -2 2285.16   10.22
  10   1  -2 2348.92   11.19
  10  -1  -2 2245.98   10.28
 -10   1   2 2321.94   11.09
  10   1  -2 2259.53   10.29
   6   1 -11   10.99    1.04
   6   1 -11   10.37    0.87
   6  -1 -11   11.87    0.99
   6  -1 -11   11.87    1.11
   6  -1 -11   11.49    0.83
   6  -1 -11   11.84    0.88
   6   1 -11   11.88    1.03
   6  -1 -11   11.48    0.68
   2  -4  -9  814.22    6.73
   2  -4  -9  837.30    4.88
   2   4  -9  804.30    4.87
   2   4  -9  820.31    4.76
   2   4  -9  770.24    5.22
  -2   4   9  813.03    5.35
   2  -4  -9  799.80    6.05
   2  -4  -9  796.90    5.44
   7   2   4  542.02    4.21
  -7  -2  -4  562.51    4.64
  -7   2  -4  546.22    5.72
   7  -2   4  518.54    4.55
   7   2   4  533.39    5.67
   7  -2   4  534.29    3.82
   7   2   4  553.16    4.62
   2   1 -11   39.36    1.40
   2  -1 -11   39.51    1.41
   2   1 -11   35.12    1.38
   2   1 -11   39.80    1.31
   2  -1 -11   38.23    1.40
   2   1 -11   40.82    1.36
   2  -1 -11   39.72    1.49
   2   1 -11   38.84    1.29
   5   5  -7  512.74    3.48
  -5   5   7  505.63    4.16
   5  -5  -7  520.31    5.35
   5   5  -7  513.57    3.59
   5   5  -7  540.61    3.75
   5  -5  -7  513.81    4.50
   5  -5  -7  489.57    4.12
   5   5  -7  526.81    4.33
   5   5  -7  502.35    3.59
   2  -3 -10    0.97    0.72
   2  -3 -10    1.34    0.58
   2  -3 -10    0.90    0.48
  -2   3  10    1.16    0.58
   2   3 -10    1.41    0.51
   2   3 -10    1.04    0.66
   2   3 -10    1.36    0.68
   8  -1   3   77.32    1.88
   8   1   3   77.65    2.07
   8   1   3   74.46    1.56
   8  -1   3   74.91    1.48
  -8  -1  -3   77.77    1.60
  -8   1  -3   77.31    2.16
   8  -1   3   79.35    1.65
   8   1   3   76.36    1.74
   8   1 -10   28.73    1.14
   8   1 -10   27.42    1.48
  -8   1  10   30.54    1.19
   8   1 -10   28.59    1.17
   8  -1 -10   28.81    1.52
   8   1 -10   29.56    1.31
   8  -1 -10   33.45    1.29
   8  -1 -10   30.06    1.11
   8   1 -10   28.59    1.14
   8  -1 -10   32.12    1.43
   8  -1 -10   30.75    1.26
  -1   6   5   19.33    1.36
   1   6  -5   20.22    0.98
   1   6  -5   20.26    0.97
   1  -6  -5   19.78    1.01
  -1   6   5   20.85    0.94
  -5   0  -7    0.18    0.81
   5   0   7    0.51    0.72
   5   0   7    0.20    0.58
  -8   4   1   30.53    1.04
   8   4  -1   34.23    1.65
   8   4  -1   30.42    1.11
   8   4  -1   31.92    1.10
   8   4  -6    1.28    0.79
   8  -4  -6   -0.05    0.74
   8  -4  -6   -0.08    0.54
   8  -4  -6    0.89    0.73
   8   4  -6    0.54    0.72
   8   4  -6    0.41    0.63
  -8   4   6    0.87    0.62
  -3   5  -5    2.77    0.69
  -3   5  -5    1.35    0.62
   3   5   5    1.27    1.18
  -3  -5  -5    2.31    0.66
   3   5   5    2.04    0.60
  -3   5  -5    1.91    0.47
  -3   5  -5    1.46    0.61
   9   1  -9  518.38    5.37
   9  -1  -9  544.93    4.56
   9   1  -9  501.99    4.86
   9  -1  -9  514.10    4.53
   9  -1  -9  517.06    5.59
  -9   1   9  519.91    4.12
   9  -1  -9  515.01    5.12
   9   1  -9  553.82    4.50
   9  -1  -9  532.16    4.49
   9   1  -9  536.09    4.68
   9   1  -9  547.22    4.86
   0  -2 -10   21.19    1.25
   0  -2 -10   21.35    1.14
   0   2 -10   19.15    0.95
   0   2  10   21.04    0.86
   0   2 -10   20.55    1.05
   0  -2 -10   18.04    1.01
   0   2 -10   20.44    1.20
   0  -5  -7   26.24    0.96
   0  -5  -7   28.98    1.39
   0   5   7   26.93    1.57
   0   5  -7   26.15    1.08
   0   5  -7   25.64    1.09
   0   5  -7   25.53    0.98
   0  -5  -7   27.58    1.17
  -4   5  -4  555.14    4.34
  -4   5  -4  537.76    4.13
   4   5   4  541.98    4.31
  -4   5  -4  560.38    5.14
  -4   5  -4  551.06    3.73
  -4  -5  -4  523.95    4.83
  -1   0 -10  229.00    3.39
  -1   0 -10  223.15    2.74
   3   6  -5  530.32    4.03
   3   6  -5  545.90    3.89
   3   6  -5  538.60    3.93
  -3   6   5  537.31    5.01
   3  -6  -5  541.00    4.20
   3  -6  -5  545.26    4.54
   7  -5  -3   13.56    0.89
  -7   5   3   13.36    0.74
  -7   5   3   14.61    0.95
   7  -5  -3   13.41    0.76
   7   5  -3   13.70    0.83
   7   5  -3   13.94    1.14
   7   5  -3   13.40    1.09
  10  -1  -7  214.89    3.55
  10  -1  -7  213.44    3.19
  10   1  -7  232.63    3.52
  10   1  -7  233.67    3.07
  10  -1  -7  208.64    3.30
  10  -1  -7  222.03    3.00
  10  -1  -7  224.27    2.98
  10   1  -7  221.62    3.20
  10   1  -7  227.06    3.17
  10   1  -7  231.88    3.14
  -6   5  -1  274.18    3.02
  -6   5  -1  264.79    3.52
  -6   5  -1  268.95    3.01
   6   5   1  278.36    3.54
   6   5   1  278.10    3.15
   6   5   1  269.72    4.16
   5   4  -9  217.42    2.69
   5   4  -9  203.78    2.13
   5   4  -9  203.43    2.80
   5   4  -9  219.05    2.94
   5   4  -9  213.03    2.53
   5  -4  -9  214.64    2.65
   5  -4  -9  205.91    3.59
   5  -4  -9  213.49    2.93
   5  -4  -9  211.18    2.79
  10  -2  -4   30.47    1.30
  10   2  -4   30.66    1.18
  10   2  -4   30.78    1.40
  10  -2  -4   29.80    1.12
  10   2  -4   32.37    1.31
   6   0   6 1412.24    6.88
  -6   0  -6 1428.62    9.32
  10   2  -5  510.06    4.34
  10   2  -5  516.66    4.90
  10   2  -5  518.59    5.23
  10  -2  -5  499.64    4.98
  10  -2  -5  528.66    4.41
  -7   5   4  556.18    4.12
   7  -5  -4  517.30    4.49
   7   5  -4  529.90    4.00
  -7   5   4  534.76    4.60
   7  -5  -4  539.30    4.12
   7   5  -4  541.54    5.35
  -1  -4  -8  692.32    5.53
  -1  -4  -8  708.49    6.24
   1   4   8  701.77    6.83
  -1   4  -8  695.80    4.75
  -1   4  -8  695.56    5.64
  -4   6  -1   23.73    0.90
   4   6   1   23.66    1.05
   4   6   1   24.49    1.44
  -4  -6  -1   22.18    1.04
  -4   6  -1   24.47    0.88
  -4   6  -1   23.64    1.12
   4   0   8 2172.85    8.66
  -4   0  -8 2158.28   11.79
   4   0   8 2181.84   11.09
   7   5  -2 1500.75    7.47
  -7   5   2 1532.55    7.79
   7   5  -2 1534.32    9.86
   7   5  -2 1562.36    9.04
  -7   5   2 1507.56    7.49
  -2   2  -9  841.55    5.03
  -2  -2  -9  840.41    5.94
  -2   2  -9  871.15    5.22
   2   2   9  813.44    6.90
   2  -2   9  845.41    4.74
  -2   2  -9  817.35    6.89
  -2  -2  -9  835.14    5.86
   4   2 -11    9.00    0.82
   4  -2 -11    9.86    0.95
   4  -2 -11    7.73    0.74
   4  -2 -11    7.91    1.02
   4   2 -11   10.11    0.87
   4   2 -11    8.77    0.71
   4   2 -11    8.03    0.86
   4   2 -11    7.90    0.76
  -1   3  -9   88.18    1.68
  -1   3  -9   93.50    1.68
  -1  -3  -9   90.22    1.73
   1   3   9   88.44    2.39
  -1   3  -9   88.22    2.18
  -2   5  -6  239.24    2.81
  -2   5  -6  242.84    2.59
  -2   5  -6  234.30    2.46
   2   5   6  241.30    2.60
   2   5   6  234.09    4.25
  -2  -5  -6  239.08    3.18
  -2   5  -6  230.96    2.78
  -5   1  -7   46.63    1.90
   5   1   7   45.87    1.73
   5   1   7   47.24    1.27
   5  -1   7   46.11    1.19
  -5  -1  -7   46.13    1.26
  -5  -1  -7   47.00    1.68
   5  -1   7   46.96    1.54
   9  -3  -1 2092.61    8.92
   9   3  -1 2066.61    8.76
   9   3  -1 2061.47    9.50
   9   3  -1 2107.24   10.36
 -10   0   1   -0.11    0.62
  10   0  -1   -0.05    0.29
  10   0  -1    0.64    0.56
  10   0  -1   -0.01    0.66
  -1  -1 -10   79.09    1.96
  -1   1 -10   81.27    1.59
  -1  -1 -10   80.27    1.84
  -1   1 -10   78.20    1.80
  -1  -1 -10   77.75    1.98
  10   2  -3  796.76    5.54
  10   2  -3  709.78    6.08
  10  -2  -3  766.65    5.70
  10  -2  -3  738.61    5.04
  10   2  -3  788.10    5.84
   7   0 -11   -0.23    0.81
   7   0 -11    0.22    0.44
   7   0 -11    0.10    0.65
   7   0 -11   -0.06    0.66
   7   0 -11   -0.22    0.65
   0   6  -5   26.08    1.08
   0   6  -5   28.95    1.09
   0  -6  -5   26.98    1.06
   0   6   5   26.47    1.64
   0   6  -5   28.01    0.87
   0  -6  -5   28.07    1.13
   0   6  -5   29.43    1.04
   6  -3 -10  516.51    4.83
  -6   3  10  512.80    4.56
   6  -3 -10  484.69    5.61
   6  -3 -10  518.13    4.12
   6   3 -10  540.02    4.88
   6   3 -10  517.45    4.06
   6   3 -10  508.06    4.26
   6   3 -10  514.44    4.94
   6  -3 -10  530.23    4.30
   1   0 -11    0.07    0.73
   1   0 -11    0.24    0.51
   1   0 -11    0.42    0.57
   5  -2 -11    1.61    0.75
   5   2 -11    0.68    0.56
   5   2 -11    0.87    0.72
   5  -2 -11    1.08    0.87
   5   2 -11    1.65    0.69
   5   2 -11    0.36    0.41
   5   2 -11    0.73    0.69
   7  -4  -8    5.17    0.68
   7   4  -8    4.33    0.81
   7   4  -8    4.95    0.60
   7  -4  -8    3.95    1.01
  -7   4   8    4.64    0.80
   7   4  -8    4.11    0.72
   7   4  -8    4.42    0.72
   3   2 -11  575.39    4.52
   3   2 -11  594.38    4.78
   3   2 -11  594.72    4.26
   3   2 -11  583.35    4.76
   3  -2 -11  571.93    5.51
   3  -2 -11  578.09    4.62
   3   2 -11  583.10    4.63
   5  -6  -2  386.60    3.55
   5  -6  -2  386.80    3.28
  -5   6   2  390.69    3.79
   5   5   3    3.42    1.05
   5   5   3    3.40    0.69
  -5  -5  -3    4.15    0.77
  -5   5  -3    3.41    0.64
  -5   5  -3    2.40    0.58
  -5   5  -3    2.76    0.80
   9  -3  -7   44.09    1.71
  -9   3   7   44.70    1.31
   9   3  -7   49.02    1.30
   9   3  -7   44.49    1.56
   9   3  -7   44.09    1.51
   9  -3  -7   44.52    1.37
  -6  -1  -6    0.78    0.67
   6  -1   6    0.52    0.59
   6   1   6    0.55    0.83
   6   1   6    2.61    0.62
  -6  -1  -6    0.92    0.41
   6  -1   6    0.21    0.71
  -6   1  -6    0.47    0.93
  10   2  -6   80.38    1.73
  10   2  -6   80.05    2.00
  10  -2  -6   84.26    1.81
  10   2  -6   86.28    2.25
  10  -2  -6   79.55    2.16
  10   2  -6   71.66    1.74
  10   2  -6   73.67    1.94
   1  -4  -9   49.84    1.53
   1   4  -9   48.99    1.40
  -1   4   9   48.49    1.78
  -1   4   9   50.70    1.27
   1  -4  -9   50.90    1.33
   1  -4  -9   49.02    1.80
   5  -6  -3    3.01    0.53
  -5   6   3    2.84    0.65
   5   6  -3    3.69    0.86
   5   6  -3    3.03    0.63
   5  -6  -3    3.41    0.65
  -5   6   3    3.73    0.76
  -4  -1  -8  140.47    2.15
   4   1   8  136.09    2.71
  -4  -1  -8  134.33    2.65
  -4   1  -8  132.55    2.92
   4   1   8  132.45    1.95
   4  -1   8  135.85    1.89
   4  -1   8  138.09    2.48
   7  -5  -5  519.35    4.53
  -7   5   5  506.75    4.48
   7   5  -5  513.34    3.78
   7   5  -5  522.13    5.03
   7   5  -5  536.82    5.12
   7  -5  -5  535.49    4.19
  -7   5   5  531.52    3.90
  -7   4  -2   30.18    1.44
   7   4   2   30.78    1.22
   7  -4   2   29.86    0.92
  -7   4  -2   32.19    1.15
   7   4   2   28.22    1.11
   7   4   2   30.58    1.58
  10   0  -8  412.42    4.46
  10   0  -8  399.40    4.04
  10   0  -8  418.45    4.62
  10   0  -8  406.38    4.23
   5   6  -1   13.53    1.09
  -5   6   1   11.94    0.95
  -5   6   1   12.38    0.84
   5   6  -1   12.71    0.87
   5   6  -1   12.28    0.93
  -5   3  -6    0.47    0.84
   5   3   6    1.58    1.08
   5  -3   6    0.17    0.59
  -5  -3  -6    1.00    0.67
   5   3   6    0.75    0.58
   5  -3   6    0.57    0.62
   4  -6  -5  305.52    3.33
   4   6  -5  300.43    2.96
   4  -6  -5  298.94    3.08
   4   6  -5  302.49    3.46
   4   6  -5  315.95    2.89
   4   6  -5  311.79    2.67
  -4   6   5  298.52    3.52
  -4   6   5  300.14    3.41
  -1   3  10   11.99    0.75
   1   3 -10   11.72    0.88
   1   3 -10   12.73    0.82
   1  -3 -10   11.42    0.76
   1  -3 -10   11.58    0.72
   1  -3 -10   11.21    1.03
   7   5  -1  319.47    3.91
  -7   5   1  326.96    3.25
  -7   5   1  317.01    3.35
  -7   5   1  309.42    3.77
   7   5  -1  329.21    4.36
   7   5  -1  307.29    3.22
  -7   0  -5   -0.06    0.78
   7   0   5    0.28    0.61
   7   0   5    0.55    0.81
  -3   5   8   36.06    1.26
   3   5  -8   35.80    1.15
   3   5  -8   36.89    1.03
   3   5  -8   35.17    1.15
   3  -5  -8   36.02    1.12
   3  -5  -8   35.52    1.57
  -3   5   8   35.16    1.37
   3  -5  -8   38.28    1.29
   4  -3   7 2811.80   11.44
   4  -3   7 2827.81   10.39
  -4   3  -7 2866.14   14.03
  -4   3  -7 2920.41   10.25
  -4  -3  -7 2889.42   12.15
   4   3   7 2850.58   14.81
   4   3   7 2867.61   10.86
  10   1  -1   88.35    1.51
 -10   1   1   92.82    2.13
  10  -1  -1   87.66    1.86
  10   1  -1   93.81    1.97
  10   1  -1   87.12    2.11
  10  -1  -1   90.83    1.83
   7  -1 -11   74.24    1.55
   7  -1 -11   77.53    1.70
   7  -1 -11   73.62    1.77
   7  -1 -11   75.16    2.11
   7   1 -11   74.63    2.07
   7   1 -11   74.54    1.90
   7  -1 -11   75.16    2.17
   7   1 -11   72.22    1.72
   1  -1 -11  492.70    4.43
   1  -1 -11  460.79    4.28
   1   1 -11  496.75    3.98
   1  -1 -11  480.60    4.60
   1   1 -11  457.88    4.45
  -4   4  -6  142.85    1.91
  -4   4  -6  135.97    1.98
  -4   4  -6  130.24    2.73
   4   4   6  133.39    3.23
   4   4   6  146.07    2.14
   4  -4   6  138.03    2.10
   3   6   3  198.64    3.81
  -3   6  -3  198.97    2.45
  -3   6  -3  204.56    2.73
   3   6   3  194.63    2.53
  -3  -6  -3  196.84    2.77
  -3   6  -3  199.74    2.37
  -2   6  -4  455.38    3.63
  -2  -6  -4  437.00    4.07
  -2   6  -4  449.96    3.55
   2   6   4  454.57    3.66
  -2   6  -4  423.81    3.53
  -2   6  -4  439.83    3.95
  -3   0  -9   -0.11    0.82
   3   0   9    0.42    0.45
   3   0   9   -0.10    0.66
   2  -5  -8  686.32    5.10
  -2   5   8  729.28    5.03
   2  -5  -8  735.57    5.44
   2  -5  -8  714.35    6.19
   2   5  -8  715.73    4.42
   2  -5  -8  730.31    4.67
  -2   5   8  688.26    6.14
   2   5  -8  692.20    4.82
   2   5  -8  720.15    4.61
  -8   4   0  375.46    3.49
   8   4   0  369.53    3.98
   8   4   0  367.55    3.49
   8   4   0  369.21    4.48
   8   4  -7  493.69    4.99
   8   4  -7  491.28    4.46
   8   4  -7  488.57    4.79
   8  -4  -7  482.36    4.42
   8  -4  -7  484.63    4.15
  -8   4   7  484.45    4.22
   5  -4   5   38.00    1.24
  -5   4  -5   40.85    1.11
  -5   4  -5   39.94    1.62
   5   4   5   41.79    1.29
   9  -2   1  357.25    2.85
   9  -2   1  361.35    3.66
   9  -2   1  358.46    3.42
  -9   2  -1  357.54    4.36
   9   2   1  355.15    3.32
   9   2   1  360.36    3.75
   9   2   1  365.94    4.32
   6  -4  -9  358.32    3.76
   6  -4  -9  348.31    4.70
  -6   4   9  372.90    3.82
   6  -4  -9  370.01    3.66
   6  -4  -9  363.22    3.43
   6   4  -9  351.90    3.13
   6   4  -9  363.49    3.81
   6   4  -9  360.63    3.95
   6   4  -9  369.63    3.45
   4  -5  -8  994.48    5.84
  -4   5   8  953.54    6.19
  -4   5   8  941.48    6.18
   4  -5  -8  966.25    7.33
   4   5  -8  992.90    5.29
   4   5  -8  965.25    5.51
   4   5  -8  981.02    5.08
   4   5  -8  998.66    5.70
   4  -5  -8  965.88    6.02
   5   6  -4   32.27    1.08
   5  -6  -4   32.74    1.20
   5   6  -4   33.20    1.35
  -5   6   4   35.58    1.36
  -5   6   4   33.10    1.18
   5  -6  -4   34.74    1.09
  10   2  -2   35.68    1.29
  10   2  -2   38.68    1.35
  10   2  -2   38.43    1.62
  10  -2  -2   39.23    1.15
  10   2  -2   36.16    1.01
 -10   2   2   40.57    1.52
  10  -2  -2   36.81    1.24
   6   2 -11 1111.15    6.58
   6   2 -11 1176.28    6.65
   6   2 -11 1125.67    7.64
   6  -2 -11 1163.68    6.15
  -6   2  11 1141.89    7.02
   6  -2 -11 1110.50    8.39
   6  -2 -11 1145.38    7.49
   6   5  -7  120.43    2.21
   6  -5  -7  121.48    2.61
   6   5  -7  116.32    1.62
   6   5  -7  118.21    2.19
  -6   5   7  120.70    2.24
   6  -5  -7  115.71    2.14
   2  -2 -11   14.47    0.94
   2   2 -11   13.56    0.91
   2   2 -11   14.28    0.99
   2  -2 -11   14.51    1.11
   2   2 -11   16.00    0.95
   6   3   5  314.46    3.24
   6  -3   5  316.39    3.39
  10  -1  -8  194.13    2.76
  10   1  -8  206.75    2.74
  10   1  -8  203.34    2.92
  10  -1  -8  195.26    2.83
  10  -1  -8  189.25    3.07
  10  -1  -8  196.55    2.99
  10   1  -8  202.53    3.05
  10   1  -8  193.83    3.28
   8  -2   3 1943.65    8.02
  -8  -2  -3 1917.09    9.23
   8   2   3 1946.51   10.88
  -8   2  -3 1947.23   11.09
   8   2 -10  587.75    4.59
  -8   2  10  569.75    4.58
   8   2 -10  590.26    5.55
   8   2 -10  606.74    4.79
   8   2 -10  584.84    5.27
   8  -2 -10  603.46    4.62
   8  -2 -10  620.69    4.51
   8  -2 -10  637.57    4.78
   8  -2 -10  608.08    5.39
   8  -3   2  123.87    1.73
   8   3   2  121.86    2.04
  -8   3  -2  119.48    2.65
   8   3   2  125.45    2.76
   8   3  -9   22.92    1.21
   8   3  -9   24.63    1.12
  -8   3   9   24.98    1.10
   8  -3  -9   25.42    1.08
   8  -3  -9   24.15    1.56
   8  -3  -9   24.86    1.18
   8   3  -9   24.37    1.34
   8   3  -9   26.87    1.05
   7   1   5  146.25    2.16
   7   1   5  136.00    2.80
  -7  -1  -5  142.42    2.64
  -7   1  -5  141.90    2.92
   7  -1   5  146.33    2.61
   9   0   2  270.04    3.48
  -9   0  -2  272.95    3.67
   9   0   2  264.75    2.68
  -9   2   9   20.10    0.96
   9   2  -9   17.44    1.25
   9  -2  -9   16.34    1.42
   9   2  -9   19.65    1.07
   9   2  -9   17.72    1.12
   9   2  -9   22.45    1.09
   9  -2  -9   19.46    1.17
   9  -2  -9   18.10    1.12
  -3   4  -7    3.85    0.68
  -3   4  -7    4.31    0.86
  -3   4  -7    4.91    0.65
   3   4   7    3.70    1.20
  -3  -4  -7    4.18    0.74
   3  -4   7    4.40    0.56
   3   4   7    4.11    0.59
  -1   5  -7    2.28    0.60
  -1  -5  -7    1.48    0.45
   1   5   7    1.57    1.04
  -1  -5  -7    1.82    0.66
  -1  -5  -7    1.84    0.77
  -1   5  -7    1.87    0.69
  -1   5  -7    1.35    0.60
  10   2  -7    5.65    0.89
  10   2  -7    5.20    0.64
  10   2  -7    5.85    0.97
  10   2  -7    5.84    0.78
  10   2  -7    5.25    0.82
  10  -2  -7    5.19    0.99
  10  -2  -7    5.76    0.76
   5   6   0    0.77    0.67
  -5   6   0    1.16    0.56
  -5   6   0    0.38    0.61
   5   6   0    0.71    0.74
   5   6   0    0.46    0.77
  -4   6  -2   12.10    0.72
  -4   6  -2   13.12    0.73
   4   6   2   13.53    1.28
   4   6   2   12.94    0.90
  -4  -6  -2   12.58    0.85
  -4   6  -2   13.43    0.81
  -4   6  -2   12.06    0.94
  -3  -3  -8   79.76    1.85
   3   3   8   79.29    2.43
   3  -3   8   78.12    1.48
  -3   3  -8   81.23    2.24
   3  -3   8   79.94    1.69
  -3   3  -8   76.88    1.49
  -3   3  -8   80.78    1.49
   3   3   8   82.63    1.56
  -2   6   6  223.90    2.74
   2  -6  -6  218.95    2.90
   2   6  -6  226.72    2.50
   2   6  -6  223.48    2.51
   2   6  -6  219.68    2.60
   2  -6  -6  225.48    3.20
  -2   6   6  220.27    3.42
   3  -1   9  204.58    2.97
   3  -1   9  197.64    2.22
  -3   1  -9  203.15    3.44
   3   1   9  199.68    2.29
  -3  -1  -9  211.14    2.66
  -3  -1  -9  207.20    3.23
   3   1   9  199.53    3.30
  -1  -6  -5   71.48    1.81
   1   6   5   72.92    2.34
  -1   6  -5   72.64    1.50
  -1   6  -5   68.84    1.64
  -1   6  -5   69.82    1.46
  -1  -6  -5   70.06    1.63
  -1   6  -5   70.01    1.34
  -6   5  -2    5.94    0.66
  -6   5  -2    5.36    0.69
  -6   5  -2    5.02    0.83
   6   5   2    6.23    0.82
   6   5   2    4.74    1.05
   6   5   2    4.30    0.77
   9   0 -10    5.50    0.86
   9   0 -10    5.87    0.73
  -9   0  10    5.55    0.65
   9   0 -10    6.81    0.81
   9   0 -10    6.22    0.91
   9   0 -10    5.65    0.95
   3   6  -6 1380.34    6.62
   3  -6  -6 1412.94    7.63
   3   6  -6 1367.00    6.61
   3   6  -6 1403.32    6.65
   3  -6  -6 1391.53    7.07
  -3   6   6 1375.37    7.39
   7  -5  -6  242.57    3.42
   7   5  -6  244.25    3.36
   7   5  -6  258.09    2.43
   7  -5  -6  248.03    2.87
   7  -5  -6  244.83    3.09
  -7   5   6  259.08    3.13
   7   5  -6  262.11    3.45
  -1   5   8    0.28    0.78
   1  -5  -8    0.52    0.44
   1   5  -8    0.16    0.58
   1   5  -8    0.23    0.47
   1   5  -8    0.59    0.69
  -1   5   8    0.83    0.43
   1  -5  -8    0.11    0.60
   1  -5  -8    0.86    0.76
   1  -5  -8    0.37    0.56
  -9   3   0    1.56    0.87
   9   3   0    2.68    0.77
   9   3   0    2.41    0.64
   9   3   0    1.32    0.57
   9   3   0    1.87    0.58
   9  -3   0    2.44    0.57
   0   7   0    0.08    0.60
   0   7   0   -0.02    0.52
   0   7   0    0.22    0.47
   6  -4   4 1387.92    7.19
   6   4   4 1388.90    7.28
   6   4   4 1400.93   10.10
   5  -2   7  909.64    5.14
   5   2   7  902.17    5.37
   5  -2   7  908.56    6.39
  -5  -2  -7  880.81    5.84
   5   2   7  850.00    7.28
  -5   2  -7  851.87    7.34
   9   1   2  247.81    2.74
   9  -1   2  252.56    2.54
   9  -1   2  258.75    3.32
   9  -1   2  261.00    2.95
   9   1   2  246.59    3.10
  -9   1  -2  255.91    3.66
   9   1   2  254.43    3.55
   7  -3 -10   16.99    1.07
   7  -3 -10   17.28    0.93
   7  -3 -10   13.54    1.37
   7  -3 -10   16.50    0.87
   7   3 -10   15.31    0.93
   7   3 -10   15.78    1.08
   7   3 -10   15.74    1.07
  -7   3  10   15.79    1.01
   7   3 -10   15.27    0.83
   1  -6  -6    0.41    0.52
  -1   6   6    0.08    0.47
   1  -6  -6    0.50    0.62
   1  -6  -6    0.24    0.63
  -1   6   6    0.08    0.87
   1   6  -6    0.18    0.51
   1   6  -6    0.01    0.64
   1   6  -6    0.31    0.59
  -7   5   0   53.84    1.36
  -7   5   0   51.15    1.65
  -7   5   0   51.48    1.35
   7   5   0   51.27    1.65
   7   5   0   53.35    1.81
  -1   2 -10  793.49    4.92
  -1   2 -10  748.04    6.31
   1   2  10  762.25    6.48
   1  -2  10  769.16    4.33
  -1  -2 -10  774.28    6.18
  -1  -2 -10  754.93    5.81
  -1   2 -10  781.26    5.07
  -1  -2 -10  788.77    5.64
   5  -5  -8  455.10    4.18
   5  -5  -8  419.18    4.88
   5   5  -8  445.98    3.49
   5   5  -8  426.99    3.13
   5   5  -8  425.73    3.39
   5   5  -8  435.13    3.11
   0   4   9  499.82    5.46
   0  -4  -9  515.95    5.37
   0   4  -9  524.55    3.93
   0   4  -9  538.61    4.18
   0  -4  -9  535.22    4.75
   0   4  -9  513.64    4.34
   0  -4  -9  513.94    4.14
  10   0   0  110.57    2.06
  10   0   0  104.30    1.61
  10   0   0  111.10    2.16
 -10   0   0  110.27    2.25
   0   7   1    2.48    0.54
   0   7  -1    2.66    0.56
   0   7   1    3.35    0.57
   0   7   1    3.08    0.83
   0   7  -1    3.14    0.60
   0   7  -1    3.05    0.61
   9  -3  -8  199.74    2.75
   9   3  -8  203.09    2.98
   9  -3  -8  196.39    3.42
   9   3  -8  204.60    2.96
  -9   3   8  200.42    2.61
   1   7   0  565.43    4.14
   1   7   0  585.66    3.93
  -1   7   0  577.12    3.92
  -1   7   0  597.49    4.85
  -1   7   0  566.37    4.41
   1   7   0  580.47    4.96
   1   7  -1  401.76    3.84
  -1   7   1  402.01    3.60
   1   7  -1  399.53    3.44
  -1   7   1  390.84    4.13
  -1   7   1  404.15    3.22
   6  -2   6  276.82    2.74
   6   2   6  276.69    4.19
   6  -2   6  273.28    3.42
  -6   2  -6  261.90    4.07
   6   2   6  268.68    2.91
  -6  -2  -6  268.65    3.07
  -9   4   4  776.32    5.01
   9  -4  -4  750.25    4.95
   9   4  -4  749.33    4.46
   9   4  -4  779.53    6.30
   9  -4  -4  757.04    5.45
   5   6  -5    0.73    0.49
   5   6  -5    0.38    0.60
   5  -6  -5    0.45    0.54
   5  -6  -5    0.99    0.60
  -5   6   5    0.67    0.55
  -8   0  -4  450.08    4.89
   8   0   4  447.93    3.96
   8   0 -11    0.08    0.85
   8   0 -11   -0.36    0.69
   8   0 -11    0.24    0.70
   8   0 -11    2.53    0.59
   8   0 -11    0.05    0.68
   9   1 -10  286.62    3.36
   9  -1 -10  276.15    3.19
   9   1 -10  285.82    3.33
   9  -1 -10  274.47    3.22
   9   1 -10  286.56    3.58
   9  -1 -10  292.75    3.82
  -9   1  10  288.27    3.05
   9   1 -10  293.56    3.98
   9  -1 -10  280.34    3.97
   9  -1 -10  295.82    3.31
   4   2   8  491.27    5.49
  -4  -2  -8  486.45    4.35
  -4  -2  -8  480.31    4.20
   4  -2   8  479.35    4.42
   4   2   8  495.14    3.83
   4  -2   8  492.79    3.66
   0   0 -11    0.13    0.51
   0   0 -11    1.06    0.80
   7   3   4    1.24    0.99
   7   3   4    0.13    0.65
  -7  -3  -4    0.01    0.61
   7  -3   4    0.24    0.60
   7  -3   4    0.15    0.49
  -7   3  -4   -0.01    0.93
   4   0 -12  905.71    6.41
   4   0 -12  921.42    5.57
   9   4  -3  313.64    4.46
  -9   4   3  297.09    2.82
   9   4  -3  295.29    2.84
   9   4  -3  317.12    3.92
   9   4  -3  305.31    2.98
   5   0 -12  366.46    3.87
   5   0 -12  377.07    3.43
   5   0 -12  366.97    4.15
   4  -6  -6    7.80    0.80
   4  -6  -6    8.15    0.77
  -4   6   6    9.32    0.87
   4   6  -6    7.99    0.65
   4   6  -6    8.38    0.62
  -4   6   6    8.85    0.80
   9   4  -5    0.39    0.61
  -9   4   5    0.25    0.57
   9   4  -5    1.31    0.87
   9  -4  -5    0.20    0.51
   9  -4  -5    1.82    0.66
  -2   4  -8    8.78    0.89
  -2   4  -8    8.53    0.77
   2   4   8    9.23    1.20
  -2  -4  -8    8.48    0.85
  -2   4  -8    9.38    0.74
   0   3 -10    3.03    0.62
   0  -3  10    3.74    0.51
   0   3 -10    4.62    0.74
   0   3 -10    3.98    0.74
   0  -3 -10    3.88    0.53
   0  -3 -10    4.57    0.63
   0  -3 -10    3.67    0.94
 -10   2   1  698.75    5.91
  10   2  -1  652.87    4.27
  10  -2  -1  668.49    4.88
  10   2  -1  685.42    5.21
  10  -2  -1  674.72    4.74
  11   0  -5    0.43    0.73
  11   0  -5    0.20    0.60
  11   0  -5   -0.14    0.62
  -1   7  -1    7.75    0.76
   1   7   1    6.80    0.91
  -1   7  -1    8.33    0.76
  -1   7  -1    6.96    0.65
   1   7   1    7.30    0.67
   7  -2 -11    1.04    0.62
   7  -2 -11    1.42    0.78
   7  -2 -11    1.23    0.97
   7   2 -11    0.94    0.81
   7  -2 -11    1.25    0.52
  -7   2  11    1.12    0.71
   7  -2 -11   -0.14    0.24
   7   2 -11    1.58    0.80
  10   0  -9    0.68    0.70
  10   0  -9    0.12    0.76
  10   0  -9    0.28    0.67
  10   0  -9    0.12    0.64
  -1   2  11  189.90    2.43
   1   2 -11  186.27    2.76
   1   2 -11  191.77    2.49
   1  -2 -11  194.88    2.97
   1  -2 -11  189.79    3.10
   1  -2 -11  199.30    2.81
   2   0  10  350.68    2.85
  -2   0 -10  362.33    4.22
  10   1   0   82.12    1.50
  10  -1   0   87.35    1.40
  10  -1   0   88.77    1.87
  10   1   0   84.44    1.89
  10   1   0   80.68    1.93
 -10   1   0   86.52    2.12
  10  -1   0   86.37    1.80
  -4   5  -5  281.26    2.95
  -4   5  -5  271.66    3.60
  -4   5  -5  276.25    2.90
  -4  -5  -5  283.79    3.51
   4   5   5  274.19    2.98
   1  -7  -2    8.17    0.67
  -1   7   2    6.49    0.55
   1   7  -2    6.28    0.62
   1   7  -2    6.31    0.63
  -1   7   2    6.94    0.70
   1   7  -2    7.72    0.70
  11   0  -4 1400.44    7.87
  11   0  -4 1381.22    7.63
  10  -3  -4  555.65    4.77
  10  -3  -4  550.65    4.26
  10   3  -4  554.25    4.36
  10   3  -4  565.71    5.15
  -5   6  -1   31.14    1.15
  -5   6  -1   28.07    1.06
   5   6   1   30.31    1.18
   5   6   1   29.70    1.50
   0   7  -2  698.24    4.51
   0   7   2  684.42    4.29
   0   7  -2  703.71    4.87
   0   7  -2  713.66    4.83
   0   7   2  707.30    4.47
   0  -7  -2  688.29    4.69
  10   3  -5 2682.57   12.76
  10  -3  -5 2671.19   10.83
  10   3  -5 2662.06   10.50
  10   3  -5 2689.20   12.12
   4   4 -10    8.25    0.78
   4   4 -10    8.35    0.70
   4   4 -10    7.85    0.74
   4   4 -10    8.68    0.85
   4  -4 -10    8.54    1.09
   4  -4 -10    8.45    0.63
   4  -4 -10    7.99    0.71
   4  -4 -10    7.83    0.84
   2   7  -1    0.96    0.57
  -2   7   1    1.53    0.43
   2  -7  -1    2.01    0.51
   2   7  -1    1.15    0.57
  -2   7   1    1.33    0.65
   8  -1   4  475.99    3.60
  -8   1  -4  475.68    5.20
   8   1   4  482.98    4.21
   8   1 -11  162.39    2.34
   8   1 -11  162.74    2.44
   8  -1 -11  161.26    2.49
  -8   1  11  163.03    2.43
   8   1 -11  165.45    2.73
   8  -1 -11  163.60    2.98
   8  -1 -11  162.18    2.91
   8  -1 -11  161.40    2.31
  -3   5  -6  169.26    2.13
  -3   5  -6  160.42    2.09
  -3   5  -6  162.57    2.27
  -3  -5  -6  171.43    2.69
   3   5   6  169.28    3.60
   3   5   6  173.48    2.28
  -3   5  -6  168.38    2.73
   3   0 -12   76.76    1.59
   3   0 -12   76.82    1.83
  11   0  -6   98.66    2.15
  11   0  -6   98.57    2.08
  -2   3  -9    0.99    0.80
  -2  -3  -9    0.11    0.62
  -2   3  -9    0.59    0.51
   2  -3   9    0.81    0.50
   2   3   9    1.99    0.94
   3   4 -10    8.53    0.79
  -3   4  10    7.85    0.73
   3  -4 -10    7.74    0.68
   3  -4 -10    9.19    0.61
   3  -4 -10    7.94    0.82
   3  -4 -10    9.01    1.11
   3   4 -10    7.73    0.73
   0  -1 -11   20.07    1.10
   0  -1 -11   21.84    1.17
   0  -1 -11   19.34    1.02
   0   1 -11   21.92    1.19
   0   1 -11   20.89    0.96
   0   6   6  105.93    2.67
   0  -6  -6  104.39    1.93
   0   6  -6  111.60    1.80
   0  -6  -6  103.09    2.00
   0  -6  -6  102.82    2.21
   7  -4  -9  129.85    2.22
   7   4  -9  122.85    2.11
  -7   4   9  133.60    2.31
   7  -4  -9  124.28    2.08
   7   4  -9  127.42    2.26
   7   4  -9  121.71    2.37
   7  -4  -9  131.72    2.90
   7   4  -9  130.51    1.99
   4   3 -11  602.53    4.70
   4  -3 -11  637.03    4.35
   4   3 -11  626.96    4.00
   4   3 -11  609.45    5.10
   4  -3 -11  613.95    5.24
  -4   3  11  598.13    4.79
   8   4   1  327.06    3.39
   8   4   1  313.21    4.26
   8   4   1  307.91    3.21
  -8   4  -1  321.11    3.20
   8   4   1  320.01    3.54
   8  -4   1  321.64    2.55
  -8   4  -1  305.22    3.98
   8   4  -8   63.07    1.83
   8   4  -8   59.06    1.71
   8   4  -8   70.63    1.41
   8  -4  -8   65.46    1.55
  -8   4   8   65.82    1.65
   8  -4  -8   62.05    1.99
   8   4  -8   61.43    1.63
   4  -1 -12  792.20    5.27
   4   1 -12  779.97    5.90
   4   1 -12  795.38    5.22
   4  -1 -12  779.05    6.26
  10   2  -8   20.83    1.15
  10   2  -8   22.19    1.04
  10  -2  -8   20.69    1.29
  10  -2  -8   22.90    1.11
  10   2  -8   22.90    0.97
  10   2  -8   24.65    1.29
  10   2  -8   23.18    1.35
  -2   7   0  206.17    2.25
  -2   7   0  220.07    2.81
  -2   7   0  207.14    2.70
   2   7   0  217.24    2.56
   2   7   0  215.34    3.12
   2  -7   0  206.23    2.33
   6  -6  -3   14.38    0.77
  -6   6   3   15.66    0.99
   6   6  -3   14.51    1.03
   6   6  -3   14.06    0.87
   6  -6  -3   14.46    0.85
  -6   6   3   14.60    0.85
   5  -1 -12  112.11    2.15
   5   1 -12  107.87    2.26
   5  -1 -12  111.88    1.83
   5   1 -12  109.63    1.98
   5  -1 -12  105.74    2.39
   5   1 -12  110.64    1.84
   5   1 -12  114.00    2.29
  -7  -2  -5   63.39    1.53
  -7   2  -5   64.16    2.08
   7   2   5   63.41    1.48
   7  -2   5   63.09    1.67
  -6   6   2  450.47    4.08
  -6   6   2  453.86    4.09
  -6   6   2  451.96    3.83
   6   0 -12  627.77    5.58
   6   0 -12  644.66    5.34
   6   0 -12  645.91    4.73
   6   0 -12  635.25    5.24
   5   5   4   67.50    2.36
  -5   5  -4   65.39    1.46
  -5   5  -4   66.37    1.47
  -5  -5  -4   65.21    1.72
  -5   5  -4   64.39    1.86
   5   5   4   69.47    1.59
   9   4  -2   18.54    1.40
   9   4  -2   17.37    1.10
   9   4  -2   16.55    0.83
  -9   4   2   16.19    0.77
   9   4  -2   17.43    0.85
  -2   7   2   81.06    1.87
   2   7  -2   85.09    1.44
   2   7  -2   85.50    1.68
  -2   7   2   83.42    1.74
   2   7  -2   85.55    1.63
  11   1  -5   21.36    1.16
  11  -1  -5   20.46    1.02
  11  -1  -5   17.99    1.12
  11   1  -5   19.05    1.09
  11   1  -5   19.07    1.05
  10   3  -3   43.87    1.28
  10  -3  -3   42.82    1.08
  10  -3  -3   43.94    1.32
  10   3  -3   42.53    1.51
  10   3  -3   47.10    1.76
  10  -1  -9    1.54    0.78
  10   1  -9    1.49    0.64
  10  -1  -9    0.76    0.72
  10  -1  -9    1.85    0.89
  10  -1  -9    0.60    0.62
  10   1  -9    1.09    0.77
  10   1  -9    0.99    0.68
  10   1  -9    1.18    0.69
  10   1  -9    1.94    0.88
   0  -5  -8  371.28    4.36
   0   5  -8  358.63    3.43
   0   5  -8  334.66    3.19
   0  -5  -8  353.61    3.51
   0  -5  -8  347.85    3.01
   0  -5  -8  354.45    3.76
   0   5   8  344.08    4.61
   2  -1  10   67.15    1.26
  -2   1 -10   69.15    2.04
  -2  -1 -10   68.55    1.75
  -2  -1 -10   63.54    1.58
   2   1  10   62.11    1.87
  -2  -1 -10   67.63    1.85
   5  -3 -11    0.71    0.72
   5  -3 -11    0.57    0.48
  -5   3  11    0.71    0.66
   5  -3 -11    0.15    0.40
   5   3 -11    0.39    0.55
   5   3 -11    0.72    0.57
   5   3 -11    0.40    0.51
   5   3 -11    0.46    0.65
  -3   6  -4    6.70    0.68
  -3   6  -4    7.01    0.76
   3   6   4    6.61    0.67
  -3   6  -4    6.48    0.69
  -3  -6  -4    7.39    0.79
   9   4  -6  120.64    2.53
   9   4  -6  124.68    2.25
  -9   4   6  121.34    2.05
   9  -4  -6  119.51    2.40
   9  -4  -6  119.55    2.08
  -3   3  11  396.17    3.67
   3  -3 -11  340.37    4.39
   3  -3 -11  385.99    4.08
   3  -3 -11  165.66    2.18
   3   3 -11  382.77    3.13
   3   3 -11  160.10    2.17
   3   3 -11  428.54    3.64
   7   4   3   55.08    1.49
   7   4   3   56.91    2.09
   7  -4   3   53.32    1.20
  -7   4  -3   51.18    1.83
   7  -4   3   53.26    1.45
  11   1  -4  220.81    3.04
  11  -1  -4  219.30    2.85
  11   1  -4  221.00    3.10
   5  -4 -10  111.35    1.83
   5  -4 -10  120.22    2.24
   5  -4 -10  116.55    2.03
  -5   4  10  109.17    2.09
   5  -4 -10  114.73    2.66
   5   4 -10  116.17    1.60
   5   4 -10  117.70    2.02
   5   4 -10  110.26    1.87
   5   4 -10  118.82    2.16
  -3  -2  -9  719.38    5.31
  -3  -2  -9  711.51    5.26
   3   2   9  703.93    4.43
   3   2   9  692.81    6.45
   3  -2   9  711.24    5.28
   3  -2   9  693.99    4.38
  11   0  -3    0.20    0.64
  11   0  -3    0.33    0.55
  10   3  -6    5.64    0.59
  10   3  -6    5.03    0.97
  10   3  -6    4.62    0.79
  10  -3  -6    3.94    0.83
  10  -3  -6    5.22    0.72
  10   3  -6    5.41    0.93
   8   5  -3  249.52    3.44
   8   5  -3  220.21    3.84
  -8   5   3  240.49    2.83
   8   5  -3  234.39    2.58
  -8   5   3  225.57    2.55
  -8   5   4  489.57    4.16
  -8   5   4  479.43    3.68
   8   5  -4  486.87    3.68
   8  -5  -4  491.42    3.88
   6  -6  -4  213.12    2.62
  -6   6   4  208.70    2.83
  -6   6   4  199.76    2.48
   6   6  -4  213.05    3.13
   6   6  -4  200.62    2.41
   6  -6  -4  198.16    2.66
   7  -5  -7  625.01    4.48
   7   5  -7  637.21    5.03
   7   5  -7  642.52    5.09
  -7   5   7  627.09    4.73
   7  -5  -7  649.73    5.60
   7  -5  -7  635.93    4.89
   3  -1 -12    0.02    0.65
   3   1 -12    1.24    0.66
   3   1 -12    0.49    0.55
   3  -1 -12    0.43    0.60
   3   1 -12    0.18    0.58
   3  -1 -12    0.20    0.66
  11  -1  -6   42.71    1.40
  11   1  -6   41.25    1.46
  11   1  -6   41.03    1.39
  11   1  -6   42.59    1.54
  11   1  -6   39.77    1.48
  11  -1  -6   39.17    1.54
   6   5  -8   -0.12    0.26
   6   5  -8   -0.01    0.21
   6   5  -8   -0.17    0.23
   6   5  -8   -0.06    0.23
   6   5  -8    0.00    0.14
   6  -5  -8  359.02    3.57
   6   5  -8   -0.10    0.20
   6   5  -8   -0.06    0.19
   6  -5  -8  428.02    4.75
  -6   5   8  425.35    4.02
  -1   7  -2   24.33    0.96
  -1  -7  -2   23.46    0.94
  -1   7  -2   21.79    0.99
   1   7   2   23.21    0.89
  -1   7  -2   22.63    0.88
   1   7   2   22.68    1.28
  -2   6  -5   90.64    1.65
  -2   6  -5   92.82    1.55
   2   6   5   90.01    2.64
   2   6   5   93.15    1.60
  -2  -6  -5   85.19    1.87
  -2  -6  -5   91.98    2.03
  -2   6  -5   94.12    1.80
  -2   6  -5   85.62    1.58
   4   6   3   39.51    1.82
   4   6   3   39.96    1.23
  -4   6  -3   39.69    1.03
  -4  -6  -3   37.82    1.30
  -4   6  -3   39.58    1.16
  -4   6  -3   41.58    1.28
   2  -4 -10    1.65    0.77
   2   4 -10    1.42    0.63
   2  -4 -10    1.01    0.52
  -2   4  10    0.93    0.54
   2  -4 -10    1.03    0.91
   2   4 -10    0.92    0.64
  -6   6   1   20.20    1.00
  -6   6   1   21.23    0.94
  -6   6   1   20.62    1.00
   6   6  -1   19.53    1.27
  -2   7  -1    7.30    0.75
  -2   7  -1    7.46    0.69
   2   7   1    7.81    0.70
  -2   7  -1    7.78    0.61
   2   7   1    7.83    0.91
   1   7  -3 1462.26    6.77
  -1   7   3 1470.62    7.10
  -1   7   3 1473.62    8.80
   1   7  -3 1459.68    6.98
  -9   2  -2   35.10    1.58
   9   2   2   36.45    1.26
   9  -2   2   36.08    1.26
   9   2   2   35.88    1.54
   9  -2   2   33.62    0.95
   7  -5   1  635.26    3.66
   7   5   1  618.32    5.26
   7   5   1  612.88    6.00
  -7   5  -1  610.87    5.37
  -7   5  -1  628.63    4.40
   6  -1 -12   74.02    1.73
   6  -1 -12   72.71    2.04
   6  -1 -12   75.73    2.02
   6   1 -12   66.59    1.87
   6   1 -12   70.55    1.64
   6  -1 -12   78.47    1.63
   6   1 -12   70.62    1.86
  11   0  -7    0.11    0.68
  11   0  -7    0.25    0.63
  11   0  -7    0.11    0.65
  11   0  -7   -0.59    0.72
  -2  -5  -7   17.27    1.16
   2   5   7   16.66    1.48
  -2  -5  -7   14.85    0.68
  -2   5  -7   14.93    0.89
  -2   5  -7   14.73    0.89
  -2  -5  -7   15.61    1.01
   5  -6  -6  455.02    3.81
   5   6  -6  433.95    4.02
  -5   6   6  423.10    3.79
   5  -6  -6  418.64    3.99
   5   6  -6  428.31    3.15
   5   6  -6  443.58    3.41
   8   5  -2   16.67    1.35
   8   5  -2   17.26    0.88
   8   5  -2   18.14    1.15
  -8   5   2   16.79    0.83
  -8   5   2   17.68    0.90
  -8   5   2   16.53    1.09
   8   5  -5  121.19    2.49
  -8   5   5  124.27    1.75
   8  -5  -5  122.15    2.20
   8  -5  -5  131.37    2.06
   8   5  -5  126.91    1.75
   8   5  -5  133.68    2.63
  -8   5   5  127.05    2.17
   2   7  -3   10.72    0.77
   2   7  -3   10.70    0.66
   2  -7  -3    9.79    0.72
  -2   7   3   10.30    0.80
   2  -7  -3    9.47    0.76
  -2   7   3   10.15    0.96
 -11   1   3  401.17    4.19
  11   1  -3  392.29    4.33
  11   1  -3  401.94    3.91
   2   0 -12  392.08    3.35
   2   0 -12  385.48    3.87
   9   3   1   53.23    1.45
   9   3   1   52.53    1.35
   9   3   1   51.13    1.76
   9  -3   1   50.61    1.36
   9  -3   1   52.34    1.06
  -9   3  -1   49.81    1.78
   0   7   3   88.25    1.46
   0   7  -3   91.64    1.71
   0   7  -3   94.09    1.72
   0  -7  -3   91.74    1.72
   0   7  -3   91.84    1.57
   9  -2 -10    2.56    0.66
   9   2 -10    2.96    0.71
   9   2 -10    3.12    0.63
   9  -2 -10    2.09    0.70
   9   2 -10    2.60    0.79
   9  -2 -10    3.11    0.79
  -9   2  10    4.68    0.67
   3   7  -1  339.88    3.51
   3  -7  -1  355.19    3.06
   3   7  -1  351.24    3.33
  -3   7   1  345.16    3.47
 -10   3   2  341.56    4.11
  10   3  -2  357.99    3.92
  10   3  -2  357.44    4.61
  10   3  -2  359.90    3.50
  10  -3  -2  336.80    3.09
  10  -3  -2  344.89    3.34
  10   3  -2  349.29    3.01
   6   3 -11    6.41    0.77
   6  -3 -11    5.34    0.76
   6  -3 -11    5.77    0.59
  -6   3  11    5.50    0.81
   6   3 -11    5.61    0.83
   6   3 -11    5.67    0.74
   6   3 -11    4.89    0.74
   6  -3 -11    6.13    0.63
   2  -3 -11   28.09    1.25
   2  -3 -11   30.41    1.48
  -2   3  11   30.45    1.05
   2  -3 -11   29.48    1.04
   2   3 -11   29.64    1.14
   2   3 -11   29.20    1.07
   2   3 -11   28.69    1.00
   3   7  -2  172.19    2.26
  -3   7   2  170.08    2.56
   3  -7  -2  170.23    2.20
   3   7  -2  175.28    2.32
  -3   7   2  175.38    2.52
  -8  -3  -3  111.39    2.09
   8   3   3  112.13    2.64
   8  -3   3  110.91    1.63
  -8   3  -3  107.84    2.55
   8  -3 -10   69.08    1.60
   8  -3 -10   67.07    2.16
   8   3 -10   66.13    1.58
   8   3 -10   69.29    1.80
   8   3 -10   71.99    1.96
   8  -3 -10   69.30    1.58
   8  -3 -10   66.09    1.76
   8   3 -10   69.42    1.57
  -8   3  10   67.85    1.63
  -6  -5  -3   20.11    1.13
  -6   5  -3   20.41    0.88
  -6   5  -3   18.79    1.16
   6   5   3   19.73    1.02
   6   5   3   20.56    1.47
  -3   6   7    0.36    0.63
   3   6  -7    0.47    0.47
   3   6  -7   -0.05    0.57
   3  -6  -7    0.19    0.66
  -3   6   7    0.37    0.59
   3  -6  -7    0.07    0.51
   3   6  -7    1.21    0.52
   3  -6  -7    0.12    0.68
   3  -5  -9   15.23    0.95
   3  -5  -9   14.35    0.91
   3   5  -9   14.64    0.71
   3   5  -9   14.55    0.83
  -3   5   9   17.84    0.92
   3  -5  -9   15.72    0.81
   3  -5  -9   15.04    1.17
   3   5  -9   14.96    0.85
   6   0   7    0.47    0.55
  -6   0  -7    0.03    0.77
   6   0   7   -0.01    0.80
  -1  -4  -9   21.06    1.31
   1   4   9   20.87    1.32
  -1  -4  -9   18.88    0.91
  -1  -4  -9   21.50    1.12
  -1   4  -9   20.08    1.06
  -1   4  -9   20.25    0.95
  -1   4  -9   19.93    0.97
   5   0   8  266.92    3.66
   5   0   8  268.02    2.70
  -5   0  -8  272.98    3.82
   2  -6  -7    9.19    0.71
   2   6  -7    9.07    0.70
   2   6  -7    8.83    0.75
   2  -6  -7    9.15    0.90
  -2   6   7    9.13    0.95
   2   6  -7    8.70    0.65
   2  -6  -7    9.37    0.84
  -2   6   7    9.16    0.70
   9   4  -1   39.91    1.17
   9   4  -1   42.37    1.45
  -9   4   1   40.44    1.13
   9   4  -1   43.08    1.25
   9   3  -9    2.56    0.87
   9   3  -9    2.51    0.66
   9   3  -9    2.11    0.76
   9   3  -9    3.04    0.65
   9  -3  -9    2.79    0.69
  -9   3   9    2.57    0.64
   9  -3  -9    1.71    0.90
  11  -1  -7   20.07    1.10
  11   1  -7   20.17    1.14
  11  -1  -7   19.62    1.17
  11   1  -7   18.63    1.03
  11   1  -7   18.59    1.12
  11   1  -7   21.58    1.22
   7   0 -12   49.00    1.53
   7   0 -12   49.37    1.52
   7   0 -12   47.19    1.35
   6   6  -5   13.64    0.93
   6  -6  -5   13.33    0.83
  -6   6   5   12.78    0.73
  -6   6   5   13.68    1.02
   6   6  -5   14.32    0.75
   6  -6  -5   13.71    0.89
   4   5  -9   72.10    1.53
  -4   5   9   66.29    1.63
   4  -5  -9   67.45    1.63
   4  -5  -9   68.73    1.61
   4   5  -9   67.79    1.34
   4   5  -9   68.37    1.23
   4   5  -9   68.13    1.47
   4  -5  -9   68.79    2.03
   6   4 -10  307.11    3.43
   6   4 -10  304.29    2.96
   6  -4 -10  327.00    4.35
   6  -4 -10  315.02    3.13
   6   4 -10  321.03    3.18
   6   4 -10  320.38    3.49
   6  -4 -10  314.11    3.51
   6  -4 -10  319.41    3.29
  10   3  -7  322.41    4.03
  10   3  -7  312.45    3.60
  10  -3  -7  314.25    3.97
  10  -3  -7  315.78    3.34
 -10   2   0   10.60    1.02
  10  -2   0    9.95    0.77
  10   2   0   10.32    0.69
  10  -2   0    9.40    0.70
  10   0   1    0.02    0.62
 -10   0  -1    0.48    0.61
  10   0   1   -0.07    0.46
  10   0   1   -0.09    0.58
  -9   0  -3    0.14    0.67
   9   0   3    0.05    0.68
   9   0   3    0.15    0.52
   9   0   3   -0.03    0.52
  -3   7   0  273.98    2.49
   3   7   0  275.73    2.87
  11   0  -2  155.48    2.42
   1   6   6  113.81    2.76
  -1   6  -6  116.74    1.97
  -1   6  -6  111.63    1.81
  -1  -6  -6  111.38    2.06
  -1   6  -6  110.97    1.80
  -1  -6  -6  113.45    2.28
  -1  -6  -6  116.66    2.07
  -9   4   7    0.31    0.56
   9  -4  -7   -0.14    0.77
   9  -4  -7    0.19    0.70
   9   4  -7    0.10    0.68
   9  -4  -7    0.33    0.58
   9   4  -7    0.02    0.81
   9   4  -7    0.23    0.63
   5   6   2   45.39    1.33
   5   6   2   45.87    1.82
  -5   6  -2   44.75    1.28
  -5  -6  -2   41.24    1.33
   2  -1 -12   66.06    1.72
   2   1 -12   60.86    1.60
   2  -1 -12   67.35    1.72
   2   1 -12   65.14    1.53
   2   1 -12   69.24    1.61
   2  -1 -12   63.68    1.74
  -8   2  -4    0.51    0.87
  -8  -2  -4    0.25    0.50
   8  -2   4    0.67    0.50
   8   2   4    0.01    0.90
   8  -2   4    1.48    0.74
   8  -2 -11   42.03    1.72
   8   2 -11   41.49    1.51
  -8   2  11   41.99    1.31
   8   2 -11   43.26    1.61
   8  -2 -11   44.13    1.55
   8  -2 -11   47.74    1.36
   8  -2 -11   43.78    1.26
  -6   6   0  305.23    3.41
  -6   6   0  297.84    3.16
  -6   6   0  303.88    3.09
   6   6   0  302.70    3.79
   0  -2 -11   94.33    1.89
   0   2 -11   99.41    2.10
   0  -2 -11  100.30    2.08
   0  -2 -11   95.99    2.20
   0   2 -11   96.53    1.71
   2  -5  -9  159.17    2.61
  -2   5   9  154.49    2.63
   2  -5  -9  164.20    2.09
   2  -5  -9  156.41    2.85
   2  -5  -9  157.70    2.34
   2   5  -9  154.62    2.07
   2   5  -9  160.88    2.06
  -2   5   9  158.58    2.17
  -4   2  12   63.10    1.60
   4   2 -12   54.74    1.46
   4   2 -12   65.56    1.60
   4   2 -12   59.51    1.56
   4   2 -12   67.12    1.63
   4  -2 -12   58.59    1.71
   4  -2 -12   63.28    1.91
   4   2 -12   59.96    1.32
   3  -7  -3   41.31    1.16
  -3   7   3   37.20    1.32
   3  -7  -3   39.50    1.17
  -3   7   3   38.07    1.27
   3   7  -3   38.38    1.17
  -5   4  -6  352.56    4.34
   5  -4   6  315.45    2.89
   5   4   6  372.34    3.36
   5  -4   6  318.45    3.30
   5   4   6  364.07    5.03
   4   6  -7  247.34    2.42
  -4   6   7  238.29    2.93
   4  -6  -7  236.47    2.93
   4  -6  -7  244.73    3.39
   4   6  -7  242.88    2.43
   4   6  -7  242.42    2.45
   5   2 -12  410.17    4.13
   5   2 -12  407.95    3.70
   5  -2 -12  422.19    4.76
   5  -2 -12  419.83    4.34
   5   2 -12  412.64    3.19
  -2   7  -2  181.44    2.19
   2   7   2  179.23    2.21
  -2   7  -2  173.76    2.26
  -2   7  -2  174.37    2.09
   2   7   2  171.58    3.04
  -2  -7  -2  166.74    2.23
   1  -4 -10   89.60    2.02
   1  -4 -10   83.97    1.65
   1   4 -10   87.60    1.71
   1  -4 -10   81.71    2.20
   6  -1   7   24.15    0.92
  -6   1  -7   21.75    1.44
   6   1   7   23.90    1.40
   6  -1   7   22.03    1.20
  -6  -1  -7   23.59    1.17
   6   1   7   22.88    0.96
   5  -1   8  305.05    3.70
  -5   1  -8  279.95    3.92
   5  -1   8  288.38    2.72
   5   1   8  301.75    4.05
  -5  -1  -8  298.66    3.64
   5   1   8  294.22    2.85
  -5   3  -7  181.25    3.24
   5  -3   7  179.06    2.56
   5   3   7  178.43    2.35
   5   3   7  188.05    3.55
   5  -3   7  181.37    2.15
   8   5  -1   34.63    1.37
   8   5  -1   34.55    1.13
  -8   5   1   36.38    1.12
  -8   5   1   35.24    1.09
  -8   5   1   33.88    1.34
   8  -5  -6   10.33    0.88
   8   5  -6   11.06    0.96
   8  -5  -6   11.09    0.89
   8   5  -6   11.54    0.97
  -8   5   6   12.20    0.86
   8  -5  -6   11.02    0.79
   7   0   6   98.70    1.71
  -7   0  -6   93.85    2.27
   7   0   6   94.24    2.23
   1  -6  -7   79.32    1.65
   1   6  -7   84.33    1.59
   1   6  -7   80.61    1.52
   1  -6  -7   81.37    1.79
   1  -6  -7   82.65    1.58
  -1   6   7   82.68    2.14
   1   6  -7   81.66    1.63
   1  -6  -7   83.86    2.00
   9   0 -11   -0.29    0.84
   9   0 -11    0.41    0.66
   9   0 -11    0.27    0.52
   9   0 -11   -0.25    0.63
  -9   0  11   -0.13    0.57
   9   0 -11    0.51    0.71
   4   4   7  234.82    2.59
  -4   4  -7  233.65    2.44
  -4   4  -7  236.07    3.51
   4  -4   7  245.75    2.79
   4  -4   7  244.89    2.49
  -4   4  -7  254.47    2.41
   4   4   7  240.51    4.11
   4   0   9    0.27    0.73
  -4   0  -9   -0.23    0.76
   4   0   9    0.29    0.49
   7   1 -12   11.32    1.02
   7   1 -12   12.19    0.93
  -7   1  12   12.14    0.94
   7  -1 -12   11.77    0.84
   7   1 -12   12.47    1.02
   7  -1 -12   13.03    0.84
   7  -1 -12   12.32    1.04
   7  -1 -12   12.45    1.07
  11   2  -5   60.61    1.50
  11   2  -5   60.83    1.81
  11  -2  -5   60.50    1.51
  11  -2  -5   58.78    1.65
  11   2  -5   61.36    1.71
  -1   3 -10    5.35    0.77
  -1  -3 -10    4.64    0.72
  -1   3 -10    4.85    0.79
   1  -3  10    5.61    0.53
  -1  -3 -10    5.09    0.58
  -1   3 -10    5.21    0.65
  -1  -3 -10    5.28    0.95
   1   3  10    4.86    0.91
  -1   0 -11   -0.16    0.73
  -1   7  -3   54.18    1.31
  -1   7  -3   53.43    1.36
  -1   7  -3   52.68    1.23
  -1   7  -3   49.50    1.18
  -1  -7  -3   49.53    1.31
   1   7   3   53.43    1.21
  10  -2  -9  180.92    3.16
  10  -2  -9  176.65    2.59
  10   2  -9  182.44    3.13
  10  -2  -9  178.85    2.71
  10   2  -9  177.38    2.67
  10   2  -9  178.11    2.83
 -10   2   9  181.44    2.28
  -2  -2 -10   19.91    1.17
  -2   2 -10   21.10    1.08
   2   2  10   20.05    1.24
   2  -2  10   20.73    0.78
  -2  -2 -10   21.46    1.02
  -2  -2 -10   20.52    1.06
  -2   2 -10   20.46    1.25
  10   1   1  295.90    2.81
  10   1   1  292.49    3.61
  10  -1   1  302.56    2.65
  10  -1   1  301.77    3.45
  10  -1   1  311.32    3.19
  10   1   1  306.93    3.30
 -10   1  -1  314.49    3.91
  11   0  -8   13.14    0.97
  11   0  -8   13.96    1.04
  11   0  -8   14.11    1.00
  11   0  -8   14.25    0.99
   9   1   3    0.90    0.76
  -9   1  -3    0.93    0.78
   9  -1   3    0.98    0.66
   9  -1   3    2.50    0.56
   9   1   3    0.92    0.63
   9  -1   3    0.60    0.49
   9   1   3    0.52    0.56
  11  -1  -2  321.75    3.37
 -11   1   2  327.45    3.78
  11   2  -4    8.39    0.96
  11   2  -4    9.79    0.91
  11  -2  -4   11.09    0.89
  11  -2  -4   10.06    0.72
  11   2  -4    9.94    0.80
   5   5  -9   55.38    1.28
   5  -5  -9   58.19    1.39
  -5   5   9   55.66    1.56
   5   5  -9   59.22    1.32
   5   5  -9   55.82    1.14
   5  -5  -9   54.75    1.51
   5  -5  -9   57.85    1.92
  10   0 -10  919.02    6.91
  10   0 -10  927.37    5.88
  10   0 -10  918.56    6.00
   6   3   6    1.55    0.62
   6   3   6    2.04    1.10
   6  -3   6    2.67    0.67
  -6  -3  -6    1.83    0.60
  -1   7   4  605.05    4.12
   1   7  -4  602.20    4.20
   1   7  -4  614.05    4.21
   1  -7  -4  552.03    4.32
   1  -7  -4  583.80    4.46
  -1   7   4  574.87    5.35
   1   7  -4  587.22    4.14
   2   7  -4  160.78    2.15
   2  -7  -4  164.56    2.22
  -2   7   4  156.70    2.60
   2   7  -4  155.95    2.00
  -2   7   4  162.48    2.25
   2  -7  -4  156.52    2.26
  -1  -5  -8    9.35    1.00
   1   5   8    8.39    1.14
  -1   5  -8    8.75    0.76
  -1  -5  -8    9.66    0.76
  -1   5  -8    9.28    0.78
  -1  -5  -8    9.30    0.81
   3   2 -12  463.15    3.93
   3   2 -12  475.55    4.02
   3  -2 -12  457.42    3.87
  -3   2  12  467.63    4.03
   3  -2 -12  457.69    4.75
   3   2 -12  474.20    4.06
   4   3   8   38.05    1.78
  -4   3  -8   42.65    1.20
  -4   3  -8   37.32    1.58
   4   3   8   38.45    1.10
   4  -3   8   37.83    1.08
   4  -3   8   41.06    1.33
  -4  -3  -8   38.66    1.29
  11   2  -6   70.37    1.88
  11  -2  -6   69.60    1.62
  11   2  -6   71.85    1.84
  11   2  -6   66.44    1.80
  11   2  -6   68.04    1.56
  11  -2  -6   70.50    1.86
  -6  -4  -5   62.04    1.67
   6  -4   5   63.20    1.31
  -6   4  -5   66.43    1.98
   6  -4   5   61.99    1.50
   6   4   5   66.93    1.53
   3   7   1  347.35    4.02
   3   7   1  352.44    3.23
  -3   7  -1  358.96    2.97
  -3   7  -1  353.70    2.89
   8   4   2  401.44    4.86
  -8   4  -2  394.84    4.47
   8  -4  -9   89.22    2.31
   8   4  -9   90.20    1.87
  -8   4   9   90.32    1.84
   8   4  -9   96.73    1.64
   8   4  -9   95.56    2.13
   8   4  -9   93.09    1.89
   8  -4  -9   94.56    1.88
  -6   2  12   54.25    1.47
   6   2 -12   49.49    1.45
   6  -2 -12   53.95    1.65
   6   2 -12   50.88    1.60
   6   2 -12   52.53    1.60
   6  -2 -12   52.62    1.82
   7  -1   6  145.54    2.01
   7   1   6  161.25    2.98
  -7  -1  -6  153.04    2.56
   7   1   6  153.03    2.15
   7  -1   6  143.37    2.57
  -7   1  -6  156.86    3.00
  -9   1  11   12.38    0.80
   9   1 -11   12.95    1.16
   9   1 -11   10.57    0.90
   9  -1 -11   11.76    0.91
   9  -1 -11   12.65    1.05
   9   1 -11   11.58    0.80
   9   1 -11   12.15    0.99
   9  -1 -11   12.43    1.13
   9  -1 -11   11.85    0.83
   9  -1 -11   10.97    0.76
  10   3  -1   59.13    1.31
  10   3  -1   63.00    1.54
  10   3  -1   60.57    1.57
 -10   3   1   62.43    1.84
   4   1   9  242.94    2.46
   4  -1   9  235.97    2.34
   4   1   9  245.29    3.59
   4  -1   9  252.63    3.26
  -4  -1  -9  245.06    3.23
  -4   1  -9  244.97    3.61
  -1  -1 -11  303.35    3.51
  -1  -1 -11  292.68    3.22
  -1  -1 -11  300.40    3.47
   7   3 -11 1451.11    8.07
   7   3 -11 1420.46    8.30
  -7   3  11 1401.42    7.57
   7  -3 -11 1472.03    7.06
   7  -3 -11 1432.77    6.99
   7  -3 -11 1486.22    8.31
   7   3 -11 1380.79    7.05
   1   3 -11  139.07    2.17
   1   3 -11  134.81    2.00
   1  -3 -11  131.91    2.62
   1  -3 -11  140.77    2.00
  -7   5   8  533.87    4.51
   7   5  -8  552.56    4.42
   7  -5  -8  551.84    4.17
   7  -5  -8  533.55    5.22
   7  -5  -8  542.14    4.50
   7   5  -8  556.34    4.63
  11  -1  -8  120.33    2.20
  11   1  -8  120.34    2.24
  11   1  -8  117.23    2.29
  11  -1  -8  122.64    2.13
  11   1  -8  120.44    2.11
  11   1  -8  121.68    2.46
  11  -1  -8  117.10    2.20
   3   4   8  115.68    1.71
   3   4   8  117.01    2.87
  -3   4  -8  122.48    1.83
  -3   4  -8  119.42    2.40
   3  -4   8  117.32    1.73
   1   0 -12   50.86    1.53
   1   0 -12   52.19    1.43
  10  -1 -10  277.15    3.57
  10   1 -10  274.97    3.20
  10  -1 -10  267.88    3.16
  10   1 -10  269.73    3.06
  10  -1 -10  274.66    3.63
  10  -1 -10  267.60    3.09
  10   1 -10  274.11    3.38
  10   1 -10  273.15    3.75
 -11   2   3  171.75    2.80
  11   2  -3  172.07    2.47
  11   2  -3  166.73    2.58
  11  -2  -3  164.54    2.41
   0   7  -4  101.86    1.72
   0  -7  -4   92.48    1.79
   0   7  -4   93.79    1.73
   0   7   4   96.59    2.31
   0   7  -4   96.44    1.49
   0   7  -4   99.31    1.66
   1  -5  -9   89.72    1.75
   1   5  -9   90.38    1.73
   1  -5  -9   89.72    1.47
  -1   5   9   84.92    2.13
   1  -5  -9   88.04    1.94
   1  -5  -9   91.80    2.24
   1   5  -9   82.97    1.56
  -6   6   6    8.95    0.87
  -6   6   6    9.36    0.64
   6   6  -6    8.84    0.62
   6  -6  -6    8.60    0.81
   6  -6  -6    9.44    0.73
   6   6  -6    8.53    0.79
   4  -7  -2  594.58    4.01
  -4   7   2  597.34    4.57
   3  -7  -4  319.33    3.13
  -3   7   4  327.87    3.24
  -3   7   4  310.65    3.36
   3  -7  -4  333.28    3.09
   3   7  -4  310.31    2.81
  -4   7   1   26.54    0.89
   4   7  -1   30.08    1.09
  -4   7   1   25.30    1.12
  -4   7   1   30.68    1.10
   4   7  -1   31.19    1.09
   7   5   2  172.94    3.22
   7   5   2  175.95    2.40
  -7  -5  -2  169.66    2.66
   7  -5   2  172.27    1.88
  -7   5  -2  172.20    2.89
  -7   5  -2  174.11    2.12
  10   3  -8  364.56    3.93
 -10   3   8  377.58    3.29
  10  -3  -8  365.76    3.62
  10  -3  -8  354.89    4.24
  10   3  -8  369.08    3.97
  -5   6   7   28.70    1.01
   5   6  -7   28.69    0.88
   5  -6  -7   31.43    1.13
   5   6  -7   28.54    0.89
  -5   6   7   29.24    1.21
   5  -6  -7   28.88    1.16
   9   4   0  298.31    3.10
   9  -4   0  287.09    2.98
   9   4   0  281.41    3.24
   9   4   0  293.43    2.95
  -7  -3  -5  341.71    3.50
   7   3   5  329.86    3.21
   7  -3   5  323.70    3.47
   7  -3   5  343.12    2.91
  -3   6  -5    9.66    0.73
   3   6   5   10.77    0.71
   3   6   5    8.96    1.36
  -3  -6  -5    9.36    0.78
  -3   6  -5   10.83    0.66
  -3   6  -5   10.87    0.82
  -3  -6  -5    9.99    0.82
   7  -4 -10  279.27    3.20
   7   4 -10  283.88    3.39
   7   4 -10  285.30    2.87
  -7   4  10  287.80    3.18
   7  -4 -10  278.59    3.09
   7  -4 -10  281.15    2.98
   7  -4 -10  285.19    4.04
   0  -6  -7   39.93    1.26
   0   6  -7   36.20    1.15
   0   6  -7   36.35    1.15
   0   6   7   37.01    1.60
   0   6  -7   38.28    1.11
   0  -6  -7   37.74    1.29
   0  -6  -7   37.59    1.40
   0  -6  -7   37.21    1.09
  11   2  -7  174.79    2.33
  11  -2  -7  170.82    2.77
  11  -2  -7  175.35    2.53
  11   2  -7  178.53    2.83
  11   2  -7  172.58    2.96
  11   2  -7  181.29    2.79
  11   0  -1    0.22    0.58
  -4   6  -4  612.73    3.74
  -4  -6  -4  613.63    4.89
   4   6   4  607.60    6.25
   4   6   4  607.91    4.31
  -4   6  -4  609.87    4.17
  -4   6  -4  613.87    4.42
   4  -7  -3    6.63    0.64
   4  -7  -3    6.14    0.58
  -4   7   3    5.71    0.72
  -4   7   3    6.86    0.76
  -8   0  -5    0.86    0.73
   8   0   5   -0.01    0.84
   8   0 -12   42.39    1.33
   8   0 -12   43.79    1.39
   8   0 -12   41.91    1.38
   8   0 -12   43.61    1.63
   7   6  -3  322.52    3.04
  -7   6   3  309.57    3.41
  -7   6   3  310.76    2.96
  -7   6   3  317.16    3.25
   7  -6  -3  315.95    2.82
  -6   6  -1  146.86    2.15
  -6   6  -1  156.03    2.14
   6   6   1  139.82    2.71
  -6  -6  -1  137.58    2.30
  -6   6  -1  149.66    2.42
   6   6   1  148.32    2.19
  -4   5  -6   91.38    1.60
  -4  -5  -6   92.95    1.95
  -4   5  -6   97.89    1.50
  -4   5  -6   94.77    2.11
   4  -5   6   92.78    1.67
   4   5   6   92.98    1.66
   4   5   6   93.72    2.72
   9   4  -8  336.99    3.81
   9  -4  -8  329.25    3.32
   9  -4  -8  333.30    4.08
   9   4  -8  328.04    3.51
  -9   4   8  335.43    3.30
   9   4  -8  336.87    3.95
   3   0  10   15.85    1.04
  -3   0 -10   14.94    1.05
   3   0  10   15.98    0.72
   1   1 -12   10.16    0.83
   1  -1 -12   10.13    0.82
   1  -1 -12   10.04    0.87
   1   1 -12   10.82    0.78
   1  -1 -12   10.73    0.86
  -3   3  -9   59.87    1.86
  -3  -3  -9   63.96    1.58
   3   3   9   60.94    2.05
  -3   3  -9   64.23    1.40
   3  -3   9   57.31    1.21
   8   5   0    3.20    0.64
  -8   5   0    4.20    0.80
   8   5   0    3.51    0.73
  -8   5   0    3.31    0.59
   8  -5  -7  249.02    3.02
  -8   5   7  241.99    2.91
   8  -5  -7  242.73    3.31
   8  -5  -7  250.60    2.83
   8   5  -7  251.75    2.78
   8   5  -7  247.56    3.20
   8   5  -7  250.75    3.32
   2   2 -12   12.10    0.94
   2   2 -12   11.07    0.82
   2  -2 -12   12.16    0.91
   2  -2 -12   11.58    1.02
   2   2 -12   10.60    0.75
  -2   2  12   12.17    0.79
   2   2 -12   11.50    0.89
   2  -2 -12   12.78    0.81
  -5   5  -5  190.15    2.25
  -5   5  -5  186.63    2.98
   5   5   5  192.26    2.41
   5  -5   5  190.04    2.38
  -5  -5  -5  196.46    2.80
   6  -5  -9   80.22    2.15
   6  -5  -9   81.86    1.73
   6   5  -9   81.81    1.41
   6  -5  -9   86.47    1.68
   7   6  -4   84.53    2.01
  -7   6   4   85.26    1.80
   7  -6  -4   84.26    1.54
   7   6  -4   85.20    1.53
   7  -6  -4   84.91    1.71
  -7   6   4   84.91    1.52
  -7   6   2    2.83    0.62
   7   6  -2    3.97    0.84
  -7   6   2    2.71    0.53
   7   6  -2    2.53    0.62
  -7   6   2    3.05    0.64
  -2   7  -3   21.25    0.89
  -2   7  -3   20.49    0.85
   2   7   3   21.09    1.30
  -2  -7  -3   19.59    0.91
  -2   7  -3   21.54    0.84
   2   7   3   22.06    0.85
   7  -4   4  681.52    4.07
   7  -4   4  664.72    4.78
   7   4   4  689.89    4.71
  -7  -4  -4  679.89    5.20
  -7   4  -4  671.04    5.98
   4   7   0   18.11    0.90
  -4   7   0   16.59    0.73
  -4   7   0   16.73    0.98
   4   7   0   18.63    1.01
   6  -2   7  883.36    4.89
   6  -2   7  871.31    6.03
   6   2   7  884.43    5.22
   6   2   7  887.57    7.31
  -6   2  -7  869.65    7.04
   5   2   8  318.64    4.32
   5  -2   8  321.40    2.78
   5   2   8  318.94    2.96
  -5   2  -8  317.14    4.20
  -5  -2  -8  327.07    3.20
   5  -2   8  319.41    3.52
  -2  -6  -6   92.96    2.03
  -2  -6  -6   89.21    1.82
  -2   6  -6   86.86    1.70
  -2   6  -6   88.91    1.41
  -2   6  -6   89.95    1.56
   2   6   6   90.19    2.55
   9  -3   2    2.66    0.44
   9   3   2    2.87    0.85
  -9  -3  -2    2.73    0.65
   9   3   2    2.23    0.61
   9  -3   2    2.94    0.64
  -9   3  -2    2.31    0.89
   0  -4 -10   73.67    1.81
   0   4 -10   71.25    1.47
   0  -4 -10   70.68    1.49
   0   4 -10   73.13    1.51
   0   4 -10   75.06    1.53
   0  -4 -10   75.02    2.03
   0  -4  10   72.06    1.28
   0   4  10   68.56    1.92
  -3   5  -7    0.39    0.54
   3   5   7    0.22    0.43
  -3  -5  -7    0.26    0.63
  -3   5  -7    0.01    0.56
   3   5   7    0.60    1.14
  -3   5  -7    0.32    0.53
   3  -5   7    0.23    0.43
  11   1  -1  178.99    2.48
 -11   1   1  178.04    2.78
   7  -2 -12  133.73    2.50
   7   2 -12  125.82    2.39
   7  -2 -12  129.71    2.69
   7   2 -12  125.40    2.07
   7  -2 -12  136.95    1.94
   7  -2 -12  128.81    1.83
  -7   2  12  126.74    2.12
   7   2 -12  124.02    2.35
  -3   7  -2    1.62    0.53
   3   7   2    1.37    0.81
   3   7   2    1.48    0.54
  -3   7  -2    1.37    0.49
  -3   7  -2    1.17    0.64
  -3   7  -2    1.09    0.45
  -3  -7  -2    1.31    0.49
   8  -1   5  715.00    5.61
   8   1   5  736.32    4.72
   8  -1 -12   13.89    0.90
   8  -1 -12   14.00    1.10
   8  -1 -12   12.48    0.87
   8   1 -12   12.69    0.98
   8   1 -12   10.28    0.85
   8  -1 -12   11.62    1.02
  -8   1  12   12.74    0.85
   8  -1 -12   12.67    0.72
  10  -2   1  238.64    2.18
  10   2   1  237.82    2.54
  10   2   1  246.25    2.91
  10   2   1  243.87    3.33
   3   1  10   43.12    1.57
   3   1  10   41.96    1.02
  -3   1 -10   40.01    1.58
  -3  -1 -10   42.09    1.35
  -3  -1 -10   42.01    1.39
  -3  -1 -10   44.20    1.20
   3  -1  10   41.40    1.00
  -9   2  -3  123.36    2.64
   9   2   3  121.61    2.58
   9  -2   3  121.68    1.69
   9   2   3  121.98    1.91
  -9  -2  -3  118.82    1.90
   9  -2   3  125.29    2.34
  11   0  -9   -0.23    0.69
  11   0  -9    0.34    0.61
  11   0  -9   -0.33    0.57
  -5   6  -3  296.35    2.90
  -5  -6  -3  291.21    3.27
   5   6   3  295.46    4.22
   5   6   3  288.58    2.99
  -5   6  -3  300.87    2.97
 -11   2   2   54.52    1.69
  11  -2  -2   55.48    1.38
  11   2  -2   53.20    1.44
  11   2  -2   54.13    1.43
  -1   7  -4  223.96    2.29
  -1  -7  -4  214.93    2.58
  -1   7  -4  216.42    2.55
  -1   7  -4  223.44    2.42
  -1   7  -4  227.35    2.41
   1   7   4  217.82    2.19
  10   4  -4  179.08    2.80
  10   4  -4  182.11    3.21
  10   4  -5  134.24    2.62
  10  -4  -5  126.14    2.10
  10  -4  -5  125.36    1.95
  10   4  -5  132.30    2.47
  -2   7   5  251.78    2.68
   2   7  -5  250.99    2.50
  -2   7   5  247.30    3.24
   2  -7  -5  256.48    2.72
   2  -7  -5  250.32    2.82
  -4   7   4    2.21    0.68
   4  -7  -4    2.01    0.54
   4   7  -4    2.02    0.58
   4   7  -4    1.30    0.54
  -4   7   4    1.96    0.60
   4  -7  -4    2.02    0.50
   9   3 -10    2.23    0.59
   9  -3 -10    2.20    0.63
   9   3 -10    2.03    0.82
  -9   3  10    2.20    0.62
   9   3 -10    2.14    0.67
   9   3 -10    2.20    0.63
   9  -3 -10    1.95    0.59
   9  -3 -10    2.31    0.96
  -2   4  -9  337.44    3.02
   2  -4   9  335.74    2.78
  -2  -4  -9  341.27    4.06
   2   4   9  329.14    4.40
  -2   4  -9  342.09    3.73
  -4   4  11    1.07    0.61
   4  -4 -11    0.40    0.88
   4  -4 -11    1.08    0.49
   4   4 -11    1.50    0.55
   4  -4 -11    0.89    0.35
   4  -4 -11    1.13    0.62
   4   4 -11    0.80    0.58
   4   4 -11    0.94    0.63
   4   4 -11    1.07    0.61
   7  -6  -5   10.90    0.82
   7   6  -5   10.92    0.66
   7   6  -5   11.65    0.95
  -7   6   5   10.31    0.62
   7  -6  -5   10.78    0.69
  -7   6   5   12.13    0.92
   1   7  -5   17.86    0.85
   1   7  -5   18.16    0.90
   1  -7  -5   17.15    0.86
  -1   7   5   17.52    0.71
   1  -7  -5   16.36    0.90
   1   7  -5   17.60    0.82
  -1   7   5   16.73    1.12
  -6   5  -4   42.76    1.09
   6  -5   4   47.65    1.29
  -6  -5  -4   48.14    1.47
  -6   5  -4   48.36    1.64
   6   5   4   47.76    1.93
   6   5   4   46.67    1.28
   6  -5   4   47.07    1.08
  -7   6   1  315.74    3.45
   7   6  -1  317.46    3.83
   7   6  -1  315.08    3.05
  -7   6   1  316.73    3.09
  -7   6   1  310.94    2.96
   7  -2   6    1.78    0.74
   7   2   6    1.39    0.59
  -7  -2  -6    1.26    0.47
  -7   2  -6    1.41    0.88
   7   2   6    0.83    0.97
   3  -6  -8    6.13    0.75
   3   6  -8    5.79    0.55
   3   6  -8    6.65    0.64
   3   6  -8    6.20    0.67
  -3   6   8    6.52    0.70
   3  -6  -8    6.20    0.83
  -3   6   8    6.69    0.72
   3  -6  -8    6.66    0.63
   3   6  -8    6.05    0.55
   9  -2 -11   10.72    0.90
   9   2 -11   10.84    1.00
   9  -2 -11    9.85    1.06
   9   2 -11   11.24    0.84
  -9   2  11    9.52    0.76
   9   2 -11    9.72    0.96
   9  -2 -11    9.61    0.88
   9  -2 -11   10.20    0.76
   9   2 -11   10.49    0.74
   4  -2   9   44.98    1.08
  -4  -2  -9   47.93    1.29
   4   2   9   47.99    1.75
  -4  -2  -9   47.85    1.30
   4  -2   9   48.02    1.43
   4   2   9   49.29    1.14
  10   0   2  915.65    5.51
  10   0   2  907.26    6.30
  -1   2 -11   46.15    1.20
  -1   2 -11   51.35    1.51
  -1   2 -11   51.03    1.59
  -1  -2 -11   49.32    1.34
  -1  -2 -11   50.16    1.58
  -1  -2 -11   48.60    1.46
  10   4  -3  585.84    4.94
  10   4  -3  579.18    5.88
  10   4  -3  583.41    3.69
  10  -4  -3  575.54    3.79
  -3   7   5  204.49    2.74
   3   7  -5  221.48    2.31
   3   7  -5  198.66    2.27
   3   7  -5  206.89    2.09
  -3   7   5  207.61    2.55
   3  -7  -5  211.59    2.42
   3  -7  -5  214.33    2.60
   0   5   9   14.24    1.13
   0   5  -9   13.44    0.84
   0   5  -9   13.57    0.87
   0  -5  -9   14.03    0.80
   0  -5  -9   12.83    0.88
   0  -5  -9   15.45    1.13
   5  -4 -11   17.39    0.77
   5  -4 -11   17.85    1.28
   5   4 -11   15.96    0.91
   5   4 -11   16.39    0.83
   5  -4 -11   16.47    0.98
  -5   4  11   16.78    0.93
   5  -4 -11   15.97    0.83
   5   4 -11   17.32    0.92
   5   4 -11   16.25    0.69
   3  -4 -11   13.45    0.74
   3   4 -11   13.37    0.75
  -3   4  11   13.79    0.80
   3  -4 -11   13.81    0.97
   3   4 -11   12.76    0.84
   3  -4 -11   13.77    1.15
 -10   3   0   16.15    1.14
  10   3   0   16.65    0.82
  10   3   0   16.41    0.88
  10  -3   0   16.27    0.84
  11  -2  -8  255.36    2.97
  11   2  -8  259.01    3.32
  11  -2  -8  256.67    3.43
  11   2  -8  264.22    2.96
  11   2  -8  249.62    2.64
  11   2  -8  258.92    3.51
  11   1  -9    3.98    0.82
  11  -1  -9    3.84    0.64
  11   1  -9    3.44    0.84
  11  -1  -9    4.03    0.72
  11  -1  -9    4.17    0.74
  11   1  -9    4.32    0.64
  11   1  -9    3.99    0.77
  11  -1  -9    3.44    0.79
   5   0 -13    0.23    0.74
   5   0 -13    0.16    0.62
   5   0 -13    0.33    0.54
  10   2 -10   18.39    0.95
  10   2 -10   20.76    1.06
 -10   2  10   18.65    0.83
  10   2 -10   18.30    1.09
  10   2 -10   17.77    1.19
  10  -2 -10   19.04    1.03
   2   6  -8  128.88    1.91
  -2   6   8  116.85    2.24
   2   6  -8  117.93    1.79
   2   6  -8  125.47    1.75
   2  -6  -8  125.12    1.84
   2  -6  -8  125.93    2.40
   2  -6  -8  125.01    2.12
  -2   6   8  125.82    1.84
   2  -6  -8  120.53    2.01
  10  -4  -6  337.03    3.54
  10  -4  -6  341.93    3.22
   9   5  -4   29.62    0.90
   9   5  -4   31.85    1.31
   9   5  -4   29.69    1.53
   9  -5  -4   29.21    0.93
  -9   5   4   28.57    1.00
  -9   5   4   27.95    0.84
   8   3   4   13.72    1.21
  -8  -3  -4   12.37    0.81
  -8   3  -4   12.12    1.13
   8   3   4   12.83    0.83
   8  -3   4   11.78    0.83
   8  -3   4   12.79    0.67
   8   3 -11    1.93    0.65
   8  -3 -11    1.74    0.90
   8  -3 -11    1.55    0.66
   8   3 -11    2.05    0.63
   8  -3 -11    2.06    0.55
  -8   3  11    2.17    0.67
   8   3 -11    2.60    0.76
   8  -3 -11    2.05    0.53
   4  -6  -8  119.01    1.93
   4   6  -8  116.89    1.64
  -4   6   8  106.76    1.79
  -4   6   8  114.18    1.96
   4  -6  -8  116.08    2.33
   4   6  -8  112.55    1.69
   4  -6  -8  112.55    2.02
   4   6  -8  110.12    1.58
   4   0 -13    0.08    0.49
   4   0 -13    0.17    0.55
   4   0 -13    0.42    0.63
   4   7   1   12.69    0.79
  -4   7  -1   11.14    0.63
   4   7   1   11.96    0.98
  -4   7  -1    9.69    0.69
  -4   7  -1   12.24    0.65
  -4   7  -1   11.18    0.86
   0   3 -11  212.95    2.45
   0   3 -11  213.78    2.73
   0  -3 -11  220.08    3.23
   0  -3 -11  223.57    2.99
   6  -6  -7   15.40    0.85
  -6   6   7   13.24    0.66
  -6   6   7   12.54    0.89
   6   6  -7   12.45    0.79
   6   6  -7   14.44    0.65
   6  -6  -7   13.48    0.87
   4   3 -12   10.58    0.77
  -4   3  12   12.64    0.85
   4  -3 -12   11.88    1.06
   4   3 -12   12.22    0.82
   4   3 -12   12.67    0.91
   4  -3 -12   12.85    0.96
   4   3 -12   10.01    0.84
   9   5  -3   48.59    1.53
  -9   5   3   46.39    1.16
  -9   5   3   47.35    1.11
  -9   5   3   45.19    1.48
   9   5  -3   46.01    1.13
   5   3 -12   64.40    1.51
  -5   3  12   68.02    1.56
   5   3 -12   70.98    1.33
   5  -3 -12   69.22    1.76
   5  -3 -12   68.79    2.05
   5   3 -12   65.38    1.51
   5   3 -12   69.48    1.70
   9   5  -5   92.13    2.17
   9   5  -5   90.44    1.32
  -9   5   5   90.46    1.66
   9  -5  -5   89.76    1.59
   2   5   8   32.82    1.64
  -2  -5  -8   32.95    1.39
  -2   5  -8   35.88    1.06
  -2   5  -8   30.98    1.05
  -2  -5  -8   34.55    1.25
   1   6   7   63.52    2.04
  -1   6  -7   67.45    1.47
  -1  -6  -7   58.69    1.26
  -1  -6  -7   68.64    1.76
  -1  -6  -7   64.31    1.52
  -1  -6  -7   64.27    1.54
  -1   6  -7   62.90    1.35
  10  -1   2   21.45    0.79
  10  -1   2   23.50    1.12
  10   1   2   21.86    1.15
  10   1   2   21.03    0.84
 -10   1  -2   24.93    1.23
  10   1   2   23.30    0.97
  10  -1   2   22.82    0.89
  11  -3  -5  225.60    2.61
  11  -3  -5  222.02    2.79
  11   3  -5  226.85    3.14
  11   3  -5  227.53    2.53
  11   3  -5  218.49    3.27
   6   0 -13   -0.04    0.55
   6   0 -13    0.01    0.70
   6   0 -13    0.09    0.64
   0   0 -12 1124.77    6.74
   0   7  -5    5.71    0.67
   0  -7  -5    5.64    0.68
   0   7  -5    6.03    0.62
   0   7   5    6.16    0.97
   0   7  -5    6.16    0.69
  10  -3  -9  182.65    2.51
  10  -3  -9  174.61    2.96
 -10   3   9  177.81    2.23
  10   3  -9  182.64    2.68
  10   3  -9  177.09    2.60
  10   3  -9  186.58    2.21
  -2   3 -10   17.58    0.78
  -2   3 -10   19.01    1.10
   2   3  10   19.78    1.26
  -2  -3 -10   18.97    0.96
   2  -3  10   18.48    0.74
  -2  -3 -10   18.98    1.16
  -2   3 -10   17.69    0.98
  -5   7   2   74.24    1.49
  -5   7   2   77.03    1.68
   1  -2 -12    1.87    0.66
   1  -2 -12    2.27    0.56
  -1   2  12    2.73    0.41
   1   2 -12    2.28    0.60
   1  -2 -12    2.61    0.75
   1   2 -12    2.34    0.57
   1   2 -12    1.85    0.63
  11   3  -4  332.68    3.11
  11   3  -4  324.44    3.65
   5   1 -13    5.09    0.73
   5   1 -13    5.74    0.71
   5  -1 -13    5.47    0.79
   5  -1 -13    4.99    0.69
   5  -1 -13    5.57    0.83
   5   1 -13    4.86    0.79
  -9   0  -4    0.38    0.67
   9   0   4    0.40    0.54
   9   0   4    0.60    0.74
  10   0 -11    0.17    0.72
  10   0 -11    0.62    0.63
  10   0 -11    0.76    0.60
  10   0 -11    0.05    0.69
  10   0 -11   -0.08    0.56
  -5   7   3   22.59    1.03
  -5   7   3   23.95    0.96
   5  -7  -3   25.90    0.95
   9   4   1    2.25    0.72
   9   4   1    2.04    0.56
   9  -4   1    2.14    0.60
   4   5 -10  262.58    2.71
   4  -5 -10  270.45    2.64
  -4   5  10  271.86    2.95
   4  -5 -10  268.48    2.91
   4   5 -10  273.81    2.46
   4  -5 -10  262.46    3.01
   4  -5 -10  273.55    3.70
  -2   0 -11    0.45    0.73
   6   6   2   15.22    1.15
   6   6   2   15.29    0.85
  -6   6  -2   14.60    0.82
  -6  -6  -2   14.92    0.92
  -6   6  -2   16.47    0.94
  11   0   0   38.76    1.25
  11   0   0   40.57    1.27
   4  -1 -13   23.30    1.13
   4  -1 -13   22.60    0.94
   4   1 -13   20.27    0.86
   4  -1 -13   22.87    1.02
   4   1 -13   24.12    1.06
   4  -1 -13   22.72    1.13
   4   1 -13   24.70    0.98
   3   3 -12  100.99    1.87
   3   3 -12   96.56    1.66
   3   3 -12   93.22    1.72
   3  -3 -12   99.68    2.06
   3  -3 -12   98.17    2.28
  -3   3  12  100.45    1.74
   3   3 -12  101.31    1.97
  12   0  -5   -0.38    0.58
  12   0  -5    0.01    0.62
  11   3  -6  174.99    2.73
  11   3  -6  172.95    2.83
  11   3  -6  170.95    2.09
  11  -3  -6  171.42    2.31
  11  -3  -6  164.83    2.55
   3   5 -10  460.06    3.43
   3   5 -10  465.76    3.65
   3  -5 -10  515.27    3.52
   3  -5 -10  458.48    4.08
   3  -5 -10  485.91    4.86
   3  -5 -10  484.60    3.86
  -3   5  10  488.32    3.78
   3   5 -10  513.04    3.96
 -10   4   2  259.74    3.40
  10   4  -2  265.34    2.53
  10   4  -2  273.58    3.21
  10   4  -2  276.74    2.77
  10  -4  -2  268.25    2.61
   6   4 -11   12.80    0.78
   6   4 -11   12.40    0.87
   6   4 -11   11.66    0.77
   6  -4 -11   11.91    0.84
   6  -4 -11   13.34    0.78
   6  -4 -11   14.29    0.73
   6  -4 -11   13.07    1.20
  -7   5   9    1.29    0.69
   7   5  -9    1.39    0.47
   7   5  -9    2.71    0.46
   7  -5  -9    1.28    0.78
  -2   4  11   12.36    0.68
   2  -4 -11   12.53    0.69
   2   4 -11   12.35    0.80
   2   4 -11   13.50    0.81
   2  -4 -11   13.35    0.94
   2   4 -11   10.85    0.81
   2  -4 -11   12.60    1.08
   7  -6  -6  106.83    1.73
  -7   6   6  101.00    1.49
   7   6  -6  114.35    1.55
   7   6  -6  111.59    2.06
  -7   6   6  112.83    2.02
   7  -6  -6  106.18    1.92
  -8   5  -1   56.69    1.30
   8   5   1   55.18    1.70
  -8   5  -1   55.14    1.66
   8  -5  -8   65.09    1.56
   8   5  -8   63.16    1.55
   8  -5  -8   65.76    1.50
   8  -5  -8   64.46    1.77
   8   5  -8   65.74    1.41
  -8   5   8   65.11    1.54
   8   5  -8   65.32    1.65
   8   4   3  154.61    2.16
   8  -4   3  150.45    2.23
  -8  -4  -3  154.75    2.40
  -8   4  -3  154.01    2.79
   8  -4   3  157.00    1.79
   8   4   3  158.84    3.05
  -5   7   1   22.69    0.93
  -5   7   1   23.94    1.06
   5   7  -1   23.44    0.95
   8  -4 -10   16.20    1.23
   8  -4 -10   16.28    0.85
  -8   4  10   15.90    0.89
   8   4 -10   16.28    0.80
   8   4 -10   15.08    0.98
   8  -4 -10   16.35    0.90
   8   4 -10   16.48    0.94
  -1   6   8   29.77    1.29
   1   6  -8   28.82    0.96
   1  -6  -8   31.42    1.32
   1  -6  -8   31.93    1.13
   1   6  -8   30.25    1.02
   1  -6  -8   31.21    0.93
   3   0 -13   -0.13    0.61
   3   0 -13   -0.25    0.47
  -4   7   5  163.88    2.29
  -4   7   5  163.45    2.32
   4   7  -5  169.03    1.93
   4  -7  -5  162.99    2.12
   4   7  -5  166.71    2.05
   4  -7  -5  163.52    2.28
  12   0  -6 1567.86    8.07
   6   3 -12   67.99    1.59
   6  -3 -12   69.33    1.72
   6   3 -12   70.98    1.72
   6  -3 -12   71.30    1.26
  -9   5   2    1.23    0.71
   9   5  -2    0.44    0.46
  -9   5   2    0.43    0.42
   9   5  -2    0.89    0.66
   9   4  -9    7.33    0.74
   9  -4  -9    6.24    0.91
   9   4  -9    6.64    0.75
   9  -4  -9    6.82    0.68
   9  -4  -9    7.66    0.75
   9   4  -9    7.81    0.88
   9   4  -9    7.38    0.55
  -9   4   9    7.70    0.69
  -7   6   0    0.38    0.55
  -7   6   0    0.32    0.46
  -7   6   0    0.61    0.52
 -11   2   1   25.19    1.26
  11   2  -1   23.87    0.78
  11  -2  -1   24.84    0.94
  11  -2  -1   24.93    0.95
   6   1 -13  382.26    3.88
   6  -1 -13  383.29    3.58
   6  -1 -13  378.50    4.02
   6   1 -13  381.07    3.40
  -6   1  13  371.70    3.56
   5   6  -8  116.28    1.53
   5  -6  -8  121.57    2.05
   5   6  -8  113.52    1.55
   5   6  -8  116.28    1.57
  -5   6   8  119.32    2.02
   5  -6  -8  121.95    2.36
   0  -1 -12  115.18    2.02
   0  -1 -12  111.02    1.94
   0  -1 -12  116.56    2.05
   8   2   5   44.58    1.74
  -8  -2  -5   43.77    1.14
   8  -2   5   49.13    1.50
   8   2   5   47.78    1.25
   8  -2   5   49.40    1.13
  -8   2  -5   47.86    1.72
   8  -2 -12    6.13    0.69
  -8   2  12    5.84    0.71
   8  -2 -12    5.39    0.79
   8   2 -12    5.19    0.85
   8   2 -12    5.69    0.82
   8  -2 -12    4.93    0.91
   8  -2 -12    5.74    0.58
 -10   4   7  150.58    2.02
  10  -4  -7  148.06    2.46
  10  -4  -7  149.98    2.17
  10   4  -7  149.19    2.35
  10   4  -7  149.84    2.54
  -9   5   6   84.24    1.63
   9   5  -6   84.58    1.95
   9  -5  -6   82.08    1.57
   9   5  -6   80.19    1.96
   9   0 -12    2.10    0.85
   9   0 -12    3.04    0.73
   9   0 -12    2.47    0.61
   9   0 -12    3.00    0.55
   9   0 -12    2.71    0.64
  -9   0  12    2.83    0.60
  -3   7  -3   54.29    1.38
   3   7   3   53.56    1.77
  -3   7  -3   53.51    1.21
  -3   7  -3   54.20    1.20
   3   7   3   55.42    1.25
  -3   7  -3   52.40    1.12
  12   0  -4  469.93    4.05
  12   0  -4  461.11    3.88
  -3  -2 -10  533.02    4.03
  -3  -2 -10  526.06    4.30
   3  -2  10  534.46    3.40
  -2   7  -4   28.58    1.05
   2   7   4   29.24    0.89
  -2   7  -4   28.48    0.95
  -2   7  -4   29.87    0.90
  -2  -7  -4   26.75    0.99
   7   5   3   50.84    1.32
  -7   5  -3   51.87    1.65
   7  -5   3   50.37    1.03
  -7  -5  -3   50.51    1.46
   7  -5   3   47.61    1.25
   7   5   3   48.80    1.83
   5  -5 -10   27.79    1.39
   5  -5 -10   27.29    0.93
   5  -5 -10   28.46    1.04
   5   5 -10   26.61    0.82
   5   5 -10   25.52    0.92
   5  -5 -10   28.49    1.04
   5   5 -10   29.06    0.97
   9   1   4    2.74    0.57
   9  -1   4    3.00    0.53
  -9   1  -4    3.11    0.84
   9   1   4    3.00    0.82
   9  -1   4    2.87    0.74
  11   3  -3  105.51    2.03
  11  -3  -3  101.09    1.70
  11   3  -3  103.52    1.77
 -11   3   3  103.18    2.16
  10   1 -11   48.43    1.33
  10   1 -11   49.99    1.19
  10  -1 -11   46.15    1.30
  10  -1 -11   49.64    1.50
  10  -1 -11   47.97    1.30
  10   1 -11   46.79    1.43
 -10   1  11   45.99    1.16
  10  -1 -11   48.74    1.60
  10   1 -11   52.23    1.70
  -2  -1 -11  107.23    2.02
  -2  -1 -11  104.65    1.73
  -2  -1 -11  107.95    1.94
  -5   7   4    0.15    0.45
   5   7  -4    0.49    0.48
   5   7  -4    0.25    0.45
   5  -7  -4    0.41    0.48
   5  -7  -4    0.41    0.47
  11  -1   0   67.52    1.46
  11   1   0   65.42    1.53
  11  -1   0   62.75    1.53
 -11   1   0   64.43    1.72
  11   1   0   61.78    1.18
  12  -1  -5  195.39    2.61
  12  -1  -5  194.76    2.48
  12   1  -5  194.36    2.54
  12   1  -5  194.83    2.66
 -12   1   5  191.72    2.61
   2  -5 -10    3.66    0.40
   2   5 -10    3.49    0.64
   2  -5 -10    3.52    0.61
   2  -5 -10    2.86    0.62
   2  -5 -10    3.11    0.82
  -2   5  10    3.34    0.45
   3  -1 -13   12.66    0.81
   3  -1 -13   13.22    0.89
   3   1 -13   12.23    0.76
   3  -1 -13   12.87    0.88
   3   1 -13   12.75    0.79
   3   1 -13   14.17    0.79
  12   1  -6   68.67    1.67
  12   1  -6   71.15    1.57
  12   1  -6   70.34    1.70
  12  -1  -6   74.48    1.72
  12  -1  -6   70.77    1.64
   7   0 -13    0.57    0.54
   7   0 -13    0.35    0.56
  12   0  -7   -0.09    0.67
  12   0  -7    0.04    0.54
  12   0  -7   -0.03    0.62
   5   4   7  122.33    1.80
   5  -4   7  119.14    1.97
  -5   4  -7  121.47    2.45
  -5  -4  -7  116.52    2.05
   5   4   7  120.09    2.83
   5  -4   7  120.34    1.71
  11  -3  -7    4.91    0.72
  11  -3  -7    5.07    0.64
  11   3  -7    5.09    0.84
  11   3  -7    5.50    0.79
  11   3  -7    5.25    0.75
   1  -4  10   12.19    0.62
  -1   4 -10   12.93    0.77
   1   4  10   10.35    1.02
  -1  -4 -10   13.42    1.09
  -1   4 -10   11.82    0.78
  -1  -4 -10   10.94    0.66
  -1  -4 -10   11.10    0.91
  -1   4 -10   11.46    0.73
  11   0 -10  400.58    3.84
  11   0 -10  402.99    3.79
  11   0 -10  393.27    3.75
  -5   7   0    0.64    0.46
   5   7   0    0.67    0.50
   5   7   0    0.51    0.53
  -5   7   0    0.78    0.60
   9   1 -12    6.48    0.83
   9   1 -12    6.34    0.77
   9  -1 -12    5.17    0.82
   9   1 -12    6.44    0.55
   9  -1 -12    5.38    0.63
  -9  -1  12    6.13    0.62
   9  -1 -12    6.11    0.73
   9  -1 -12    5.71    0.80
   9  -1 -12    5.65    0.60
  -9   1  12    6.28    0.66
  -4  -6  -5  426.12    3.82
   4   6   5  430.11    3.36
  -4  -6  -5  425.78    3.92
  -4   6  -5  427.47    2.89
  12  -1  -4   67.41    1.56
 -12   1   4   66.28    1.61
  12   1  -4   66.34    1.53
   6   0   8   10.45    0.69
  -6   0  -8   10.39    0.92
   6   0   8   10.66    0.96
  -4   7  -2  154.56    2.01
  -4   7  -2  158.83    2.19
  -4   7  -2  156.69    1.70
   4   7   2  156.14    2.07
  11   2  -9  347.28    3.63
  11   2  -9  351.90    2.87
  11   2  -9  349.29    4.01
  11   2  -9  361.58    3.76
  11  -2  -9  362.56    4.02
  11  -2  -9  342.35    3.48
   2   7  -6  604.82    3.90
  -2   7   6  604.27    4.83
  -2   7   6  627.85    4.00
   2  -7  -6  598.80    4.37
   2   7  -6  621.21    3.94
  -6  -4  -6  172.45    2.44
   6  -4   6  170.22    2.33
   6   4   6  169.28    2.15
  -6   4  -6  175.03    2.95
  -1   7  -5  262.15    2.21
  -1   7  -5  272.09    2.58
  -1   7  -5  267.52    2.48
   1   7   5  256.36    3.60
  -2   3  12    6.89    0.59
   2   3 -12    6.10    0.56
   2   3 -12    5.69    0.77
   2   3 -12    5.50    0.66
   2  -3 -12    4.20    0.75
   2   3 -12    5.16    0.74
   2  -3 -12    5.63    0.85
  -3  -6  -6  231.19    2.96
  -3   6  -6  232.76    2.22
   3   6   6  229.91    2.25
   3   6   6  234.32    3.72
  -3  -6  -6  223.43    2.76
   3  -6   6  236.92    2.39
  -3   6  -6  233.39    2.49
   4  -4   8  418.91    3.11
   4   4   8  412.76    3.12
   4   4   8  407.20    4.97
  -4   4  -8  411.99    4.24
  -4   4  -8  435.11    3.12
  -4  -4  -8  417.33    3.80
   4  -4   8  445.12    3.75
   3   7  -6   83.15    1.35
   3   7  -6   85.59    1.45
  -3   7   6   80.75    1.68
  -3   7   6   86.84    1.60
   3   7  -6   86.33    1.43
   3  -7  -6   83.17    1.52
   3  -7  -6   83.48    1.65
  12   0  -3    0.16    0.60
   5   0   9   -0.01    0.45
   5   0   9    0.21    0.69
  -5   0  -9    0.08    0.69
   7   1 -13   58.57    1.57
   7   1 -13   48.36    1.27
   7   1 -13   50.95    1.56
   7  -1 -13   55.71    1.65
   7  -1 -13   53.94    1.57
   7  -1 -13   55.12    1.38
   7  -1 -13   57.54    1.33
  -7   1  13   56.17    1.42
  -7   0  -7    0.12    0.67
   7   0   7    1.16    0.53
   7   0   7    0.07    0.73
  12   1  -7  298.00    3.02
  12  -1  -7  303.02    3.34
  12   1  -7  300.90    3.33
  12   1  -7  301.82    3.41
  12  -1  -7  302.80    3.23
  -6  -3  -7  117.25    1.93
   6   3   7  118.49    1.78
   6  -3   7  116.39    1.65
   6  -3   7  122.53    2.08
   6   3   7  121.07    2.73
   1   5   9   21.53    1.26
  -1  -5  -9   21.86    1.02
  -1   5  -9   22.40    0.88
  -1   5  -9   21.65    0.90
  -1  -5  -9   21.45    0.91
  -1  -5  -9   21.99    1.19
  -5  -3  -8    4.32    0.61
   5  -3   8    4.10    0.55
  -5   3  -8    3.95    0.79
   5   3   8    4.06    1.05
   5  -3   8    4.41    0.67
   5   3   8    4.20    0.56
  -5  -6  -4   18.63    0.89
  -5   6  -4   21.07    0.82
  -5   6  -4   20.59    0.84
   5   6   4   20.92    1.34
   5   6   4   20.48    0.89
  -5  -6  -4   22.06    1.02
   1  -7  -6   12.44    0.82
  -1   7   6   10.96    0.94
   1  -7  -6   10.57    0.70
   1   7  -6   12.43    0.77
   1   7  -6   11.44    0.69
  -9   5   1  283.40    3.48
   9   5  -1  289.68    3.33
   9   5  -1  295.99    2.77
  -9   5   1  287.35    2.68
  10   4  -1    1.55    0.55
  10   4  -1    1.21    0.47
  10  -4  -1    1.47    0.47
 -10   4   1    1.19    0.72
  10   4  -1    1.25    0.48
   2   0 -13   -0.21    0.52
 -10  -2  -2  134.57    1.86
 -10   2  -2  137.04    2.57
  10   2   2  132.69    2.49
  10  -2   2  136.61    1.66
  10  -2   2  140.57    2.25
  10   2   2  136.55    1.87
   7  -3 -12   25.16    0.86
   7  -3 -12   24.23    1.12
   7   3 -12   23.94    1.08
  -7   3  12   24.02    1.00
   7   3 -12   23.03    1.05
   7   3 -12   22.35    1.01
   7  -4 -11   91.54    1.63
   7   4 -11   88.29    1.76
   7   4 -11   95.74    1.63
  -7   4  11   94.77    1.79
   7  -4 -11   94.69    1.82
   7   4 -11   87.78    1.72
   7  -4 -11   95.34    1.61
   7  -4 -11   96.17    2.34
  11  -1 -10  114.65    1.87
  11  -1 -10  115.65    2.20
  11   1 -10  117.56    1.84
  11   1 -10  116.38    2.02
  11   1 -10  114.61    2.27
  11   1 -10  117.87    2.13
  11  -1 -10  114.85    2.14
   6   5 -10   34.23    0.98
   6  -5 -10   34.66    1.12
   6   5 -10   35.77    0.99
   6  -5 -10   33.86    1.02
   6  -5 -10   32.95    1.43
   1   4 -11   44.19    1.19
   1  -4 -11   48.55    1.50
   1  -4 -11   45.71    1.59
   1  -4 -11   48.05    1.11
   0   6  -8  139.99    1.93
   0   6  -8  156.34    2.04
   0  -6  -8  147.83    1.83
   0  -6  -8  156.74    2.54
   0  -6  -8  153.90    2.25
   0   6   8  143.17    2.64
 -10   3  -1   59.46    1.78
  10   3   1   54.29    1.22
  10  -3   1   58.30    1.43
  10   3   1   55.20    1.38
  10   3   1   55.56    1.58
   6   1   8    2.82    0.88
   6  -1   8    2.52    0.75
  -6   1  -8    3.17    0.84
   6  -1   8    3.24    0.53
  -6  -1  -8    2.77    0.60
   6   1   8    3.50    0.56
   9   3   3   27.79    1.37
  -9  -3  -3   26.22    1.01
   9   3   3   23.45    0.93
   9  -3   3   24.23    0.77
  -9   3  -3   26.99    1.38
  11   3  -2   94.61    1.77
 -11   3   2   96.01    2.10
  11  -3  -2   93.14    1.54
  11   3  -2   97.01    1.69
   9   5  -7   73.76    1.72
   9  -5  -7   73.38    1.64
  -9   5   7   75.03    1.53
   9   5  -7   75.20    1.84
   9  -5  -7   70.42    1.47
   5   2 -13   17.50    0.92
   5  -2 -13   17.37    1.12
  -5   2  13   16.50    0.93
   5   2 -13   14.26    0.96
   5   2 -13   17.16    0.89
   5  -2 -13   18.34    1.05
  -5   7   5  121.18    2.00
   5   7  -5  141.13    1.82
   5  -7  -5  135.30    2.01
  -5   7   5  127.97    1.86
   5   7  -5  135.88    1.59
  -8   6   3  100.88    1.90
   8   6  -3  104.67    2.09
  -8   6   3  104.73    1.73
   8   6  -3  102.14    1.57
  -8   6   3   99.56    1.51
  -8   6   4   89.06    1.78
  -8   6   4   92.48    1.64
   8   6  -4   90.02    1.44
   8  -6  -4   88.95    1.44
   7  -6  -7  234.28    2.75
   7   6  -7  244.88    2.79
   7   6  -7  237.14    2.02
  -7   6   7  243.85    2.84
   7  -6  -7  229.17    2.53
  -4   2  13   10.62    0.75
   4  -2 -13   11.03    0.96
   4   2 -13   11.60    0.79
   4   2 -13   11.44    0.61
   6  -6  -8   13.53    0.85
   6  -6  -8   14.05    0.92
   6   6  -8   13.46    0.55
   6  -6  -8   14.22    0.78
 -12   1   3  184.46    2.56
  12  -1  -3  182.47    2.35
  12   0  -8  190.52    2.64
  12   0  -8  195.16    2.59
  12   0  -8  195.59    2.65
   5  -1   9  140.31    1.77
   5   1   9  137.65    1.83
   5  -1   9  134.68    2.34
   5   1   9  137.41    2.57
  -5   1  -9  137.28    2.54
  -5  -1  -9  138.33    2.17
  10   4  -8   75.18    1.85
  10   4  -8   74.99    1.73
  10  -4  -8   71.67    1.52
 -10   4   8   71.68    1.39
  10   4  -8   75.74    1.68
  10  -4  -8   73.04    1.77
  -5   5  -6   37.65    1.34
   5  -5   6   35.81    1.05
   5   5   6   35.97    1.04
   5   5   6   36.85    1.72
  -5   5  -6   35.39    0.92
  -5  -5  -6   36.20    1.22
   7  -1   7   86.77    1.96
  -7   1  -7   83.87    2.02
   7  -1   7   82.05    1.43
   7   1   7   87.83    2.19
   7   1   7   90.91    1.56
   1   5 -10   79.59    1.56
   1  -5 -10   82.08    1.98
   1   5 -10   78.93    1.40
   1  -5 -10   80.60    1.71
   4  -7  -6    5.36    0.61
   4   7  -6    5.49    0.54
   4   7  -6    5.74    0.57
  -4   7   6    6.10    0.71
  -4   7   6    6.09    0.61
   4  -7  -6    5.81    0.57
  -7   4  -5  255.48    3.49
  -7  -4  -5  263.45    2.98
   7  -4   5  257.96    2.35
   7   4   5  253.23    3.86
   7  -4   5  244.63    2.78
   7   4   5  245.60    2.61
   7   6   1   37.03    1.10
  -7  -6  -1   32.21    1.15
  -7   6  -1   35.10    1.00
  -7   6  -1   36.47    1.24
  -7   6  -1   35.75    1.06
   7   6   1   35.29    1.28
  -7  -3  -6    3.64    0.57
   7   3   6    3.86    0.59
   7  -3   6    3.24    0.71
  -7   3  -6    3.83    0.94
   9  -3 -11   10.70    0.71
  -9   3  11   10.75    0.75
   9   3 -11   11.13    0.75
   9   3 -11   10.58    0.87
   9  -3 -11   11.02    0.79
   9  -3 -11   10.32    1.03
   9   3 -11   10.53    0.83
  -4   5  -7  242.83    2.33
  -4  -5  -7  241.24    3.17
   4   5   7  257.37    3.92
   4  -5   7  249.37    2.35
  -4   5  -7  257.02    2.18
  -4  -5  -7  254.94    2.99
  -4   5  -7  242.86    2.97
   4   5   7  246.56    2.36
   4  -5   7  241.98    2.51
   2  -1 -13    6.55    0.66
   2   1 -13    7.27    0.62
  -2   1  13    6.87    0.65
   2   1 -13    6.24    0.72
   2  -1 -13    6.45    0.68
   2  -1 -13    6.14    0.73
  -2  -6  -7  145.62    1.72
  -2   6  -7  152.20    2.01
   2   6   7  159.61    3.01
  -2   6  -7  161.08    1.88
  -2  -6  -7  153.60    2.16
  -2  -6  -7  154.05    2.47
  -2  -6  -7  161.03    2.29
  -4  -3  -9   61.95    1.68
   4  -3   9   63.33    1.19
  -4  -3  -9   64.43    1.48
  -4   3  -9   62.76    1.78
   4   3   9   63.18    1.99
   4   3   9   62.74    1.19
   6  -2 -13  569.86    5.13
   6   2 -13  562.84    4.08
   6  -2 -13  563.84    4.83
  -1   3 -11  187.52    2.52
  -1  -3 -11  192.40    2.64
  -1  -3 -11  197.74    2.90
  -1   3 -11  191.36    2.17
  -1  -3 -11  194.90    2.05
  -1   3 -11  185.22    2.30
   0  -2 -12    0.85    0.65
   0  -2 -12    0.58    0.51
   0   2 -12    1.03    0.56
   0  -2 -12    0.44    0.56
  11  -3  -8   51.50    1.52
  11  -3  -8   53.57    1.36
  11   3  -8   52.24    1.60
  11   3  -8   51.57    1.50
  -4   0 -10  405.12    3.92
   4   0  10  403.01    2.94
  -8   6   2   15.55    0.78
   8   6  -2   18.21    1.04
   8   6  -2   16.76    0.76
  -8   6   2   13.95    0.86
  -8   6   2   13.21    0.68
   8   6  -5   25.18    0.77
   8  -6  -5   25.72    0.87
  -8   6   5   25.08    0.75
  -8   6   5   27.51    1.00
   8   6  -5   27.36    1.18
  -3   4  -9    2.99    0.59
   3  -4   9    3.19    0.49
   3   4   9    2.79    0.92
  -3  -4  -9    2.61    0.63
  -3   4  -9    3.22    0.47
  -3  -4  -9    2.87    0.83
  -3   4  -9    3.01    0.69
 -10   3  10   84.77    1.51
  10   3 -10   87.11    1.53
  10  -3 -10   84.00    2.03
  10   3 -10   82.51    1.71
  10   3 -10   85.37    1.99
   9   2   4   21.80    1.26
  -9   2  -4   22.67    1.25
   9  -2   4   21.15    0.80
   5   7   1   47.34    1.39
   5   7   1   50.93    1.22
  -5   7  -1   49.91    1.26
  10   2 -11   61.29    1.58
  10   2 -11   63.40    1.42
  10   2 -11   66.96    1.49
 -10   2  11   61.29    1.29
  10  -2 -11   58.79    1.70
  10  -2 -11   63.51    1.41
  10  -2 -11   62.17    1.57
   8   0   6  387.02    4.18
  -8   0  -6  385.49    3.91
  -2  -2 -11   93.02    1.63
   2  -2  11   89.67    1.24
  -2   2 -11   90.64    1.93
   8   0 -13    0.04    0.58
  -8   0  13    0.38    0.58
   8   0 -13    0.09    0.55
  11   2   0   33.53    0.91
  11   2   0   34.72    1.09
  11  -2   0   32.16    1.06
  11  -2   0   31.09    0.91
 -11   2   0   34.00    1.34
  12   2  -5   72.65    1.48
  12   2  -5   73.50    1.68
  12  -2  -5   75.55    1.57
 -12   2   5   74.20    1.73
  12  -2  -5   75.53    1.49
   0   7  -6   36.02    1.04
   0  -7  -6   36.49    1.13
   0  -7  -6   34.88    1.03
   0   7   6   35.58    1.37
   0   7  -6   38.59    1.05
   6   5   5  320.97    2.92
   6  -5   5  317.87    2.54
   6   5   5  317.57    4.26
   6  -5   5  306.05    2.93
  -6   5  -5  313.45    3.65
  -6  -5  -5  305.56    3.29
  12   1  -8  109.93    2.05
  12   1  -8  107.40    2.08
  12  -1  -8  109.06    1.96
  12   1  -8  113.31    1.84
  10   0   3    0.25    0.66
  10   0   3    0.11    0.46
  10   0   3    0.20    0.48
   6   6   3   32.93    1.48
   6  -6   3   32.16    0.83
   6   6   3   34.99    1.04
  -6  -6  -3   31.53    1.12
  -6   6  -3   33.21    0.96
  -6   6  -3   33.03    1.13
   3   2 -13    7.97    0.71
   3  -2 -13    8.19    0.82
   3   2 -13    7.67    0.58
  -3   2  13    8.28    0.66
   3  -2 -13    8.45    0.84
  12   2  -6   17.16    1.01
  12  -2  -6   18.57    0.94
  12   2  -6   17.61    0.99
  12   2  -6   17.52    0.79
  12  -2  -6   17.35    0.86
  -6   7   3  115.26    1.88
  -6   7   3  110.65    1.63
   6   7  -3  114.16    1.70
   6  -7  -3  109.11    1.51
   0   8   0  420.54    2.94
   0   8   0  422.79    2.96
   0   8   0  419.71    3.46
   8   5   2   89.29    2.08
  -8   5  -2   91.03    2.03
   8  -5   2   86.32    1.57
  -8  -5  -2   94.28    1.84
   8   5  -9  142.17    1.92
  -8   5   9  142.36    2.11
   8  -5  -9  137.44    2.45
   8  -5  -9  147.47    2.04
   8   5  -9  146.10    1.95
   8   5  -9  141.91    2.15
   3   6  -9   13.26    0.72
   3   6  -9   11.50    0.67
   3   6  -9   12.66    0.71
   3   6  -9   14.00    0.65
  -3   6   9   13.38    0.70
   3  -6  -9   13.14    0.98
  -3   6   9   13.81    0.72
  -6   7   2  401.18    3.47
  -6   7   2  391.22    3.16
  -1   0 -12  486.98    4.09
  12   0  -2  634.08    4.51
  11   0   1   -0.06    0.55
  11   0   1   -0.02    0.50
   9   4   2    9.07    0.95
  -9  -4  -2    9.28    0.74
   9   4   2    8.71    0.69
   9  -4   2    8.35    0.71
   9  -4   2    9.04    0.48
   4   6  -9    6.25    0.57
   4   6  -9    6.66    0.51
   4  -6  -9    8.00    0.63
   4  -6  -9    7.13    0.86
  -4   6   9    6.37    0.65
   4   6  -9    7.18    0.58
  -3   7  -4    6.45    0.50
  -3  -7  -4    5.13    0.54
  -3   7  -4    5.47    0.55
   3   7   4    5.94    0.95
   3   7   4    5.40    0.53
  -3   7  -4    4.22    0.60
  -3  -7  -4    5.18    0.60
   9   2 -12   93.88    2.00
   9  -2 -12   95.46    2.13
  -9   2  12   97.38    1.65
   9  -2 -12   87.92    1.89
   9   2 -12   81.77    1.60
   9  -2 -12   96.21    1.63
   9   2 -12   92.09    1.87
   9  -2 -12  104.34    1.75
  12   2  -4   62.40    1.52
 -12   2   4   60.86    1.58
  12   2  -4   60.37    1.37
   0   8   1    4.56    0.41
   0   8  -1    5.47    0.52
   0  -8  -1    4.37    0.50
   0   8  -1    4.82    0.49
   0   8  -1    4.69    0.52
   0   8   1    4.17    0.45
   0   8   1    4.59    0.63
   3  -5   8  134.18    1.68
  -3   5  -8  132.83    1.75
  -3   5  -8  132.08    1.98
  -3  -5  -8  138.84    2.17
  -3   5  -8  135.41    1.64
   3   5   8  130.69    2.76
  -3  -5  -8  130.01    2.32
   1   3 -12  254.08    2.54
   1   3 -12  256.52    2.76
   1   3 -12  251.16    2.59
   4   1  10   21.07    0.74
  -4   1 -10   21.01    1.14
  -4  -1 -10   18.89    0.93
   4  -1  10   18.22    0.96
  -4  -1 -10   22.05    0.95
   4   1  10   21.89    1.17
   4  -1  10   21.63    0.75
   1   8   0   82.00    1.54
   1   8   0   82.30    1.35
  -1   8   0   81.52    1.26
  -1   8   0   84.16    1.42
  -1   8   0   84.32    1.55
  -1   8   1    9.02    0.60
  -1   8   1    8.67    0.50
   1   8  -1    9.74    0.60
   1  -8  -1    7.86    0.55
  -1   8   1    8.47    0.70
   1   8  -1    8.10    0.56
   8   1   6    0.59    0.53
  -8   1  -6    0.51    0.68
   8   1   6    0.72    0.79
   8  -1   6    0.08    0.69
  -6   7   4   80.37    1.36
  -6   7   4   87.16    1.65
   6  -7  -4   85.88    1.40
   6   7  -4   82.53    1.38
   6  -7  -4   86.71    1.49
   8   1 -13   48.79    1.51
   8  -1 -13   47.57    1.20
   8  -1 -13   46.17    1.19
   8  -1 -13   48.75    1.56
   8  -1 -13   47.47    1.45
   8   1 -13   48.96    1.41
   8   1 -13   46.53    1.25
  -8   1  13   46.63    1.23
   9   4 -10  399.39    3.83
   9   4 -10  402.89    3.02
  -9   4  10  385.83    3.28
   9   4 -10  393.26    3.57
   9   4 -10  385.31    3.27
   2  -6  -9   18.10    0.90
  -2   6   9   20.06    0.89
   2  -6  -9   20.80    1.12
   2  -6  -9   17.62    0.85
   2   6  -9   20.18    0.85
   2   6  -9   19.86    0.84
   2   6  -9   18.05    0.83
  -2  -7  -5    0.82    0.42
  -2   7  -5    1.02    0.56
  -2   7  -5    1.19    0.52
   2   7   5    0.54    0.84
  -2  -7  -5    0.70    0.48
  -2   7  -5    0.77    0.34
  10  -1   3   40.82    1.38
  10   1   3   40.27    1.43
  10   1   3   38.11    1.03
 -10   1  -3   41.31    1.44
  10  -1   3   40.14    0.98
   4   7   3   36.36    1.00
  -4   7  -3   38.17    1.00
  -4   7  -3   36.28    1.07
   4   7   3   38.49    1.43
  -4   7  -3   37.46    0.84
  -9   5   0  171.16    2.62
   9  -5   0  170.08    2.09
   9   5   0  172.96    2.08
   7  -2 -13  173.83    2.75
  -7   2  13  165.28    2.20
   7  -2 -13  166.39    2.57
   7   2 -13  165.50    2.45
   7   2 -13  176.25    2.50
   7   2 -13  158.32    2.13
  12   2  -7  596.47    4.80
  12   2  -7  608.84    4.67
  12   2  -7  597.55    3.98
  -6   7   1  120.60    1.85
  -6   7   1  119.03    1.74
  -1  -1 -12    4.36    0.63
  -1  -1 -12    4.95    0.55
  12   1  -2   14.41    0.83
 -12   1   2   13.82    0.87
  12  -1  -2   13.47    0.76
 -11   1  -1    0.07    0.61
  11   1   1   -0.16    0.40
  11  -1   1    0.20    0.43
  11   1   1    0.30    0.58
  11  -1   1    0.17    0.57
  11   1   1    0.04    0.52
  -8   6   1    1.19    0.42
  -8   6   1    1.50    0.48
   8   6  -1    1.90    0.66
   8   6  -1    1.40    0.50
  -8   6   1    1.49    0.58
   8   6  -6  175.90    1.69
  -8   6   6  177.49    2.26
   8  -6  -6  174.48    2.06
   8   6  -6  176.10    2.46
   7  -5 -10  128.35    1.87
   7  -5 -10  126.91    1.97
   7   5 -10  139.65    1.61
   7   5 -10  136.50    1.81
  -7   5  10  129.85    2.00
   7  -5 -10  128.04    2.39
  11  -3  -1  264.19    2.70
  11   3  -1  270.82    2.72
 -11   3   1  261.79    3.28
  -1   8  -1   98.47    1.51
   1   8   1   95.12    1.71
  -1   8  -1   98.56    1.39
   1   8   1   96.40    1.39
  -1   8  -1   97.45    1.54
  11   2 -10    8.28    0.80
  11   2 -10    8.43    0.91
  11   2 -10    7.76    0.73
  11   2 -10    8.42    0.71
   8  -3   5  759.15    5.31
   8  -3   5  752.32    4.03
  -8   3  -5  735.53    5.96
   8   3   5  745.23    6.21
   8   3   5  763.12    4.59
   8  -3 -12   77.74    1.40
   8  -3 -12   74.48    1.66
  -8   3  12   73.64    1.51
   8   3 -12   72.98    1.64
   8   3 -12   72.24    1.62
  -5   7   6   34.74    0.96
   5  -7  -6   35.20    1.06
  -5   7   6   36.44    1.14
   5  -7  -6   36.66    1.06
   5   7  -6   37.82    0.87
   5   7  -6   35.99    0.92
  10  -4   0   27.01    0.94
 -10   4   0   27.83    1.26
  10   4   0   27.83    0.89
   1   0 -13    0.28    0.59
   9   5  -8  126.85    2.27
   9  -5  -8  128.79    2.12
   9   5  -8  125.90    2.02
  -9   5   8  129.94    1.91
   9  -5  -8  133.53    1.92
   6  -2   8   50.68    1.10
   6  -2   8   52.30    1.46
   6   2   8   51.22    1.76
  -6   2  -8   51.90    1.66
   6   2   8   52.47    1.15
   1   8  -2   92.99    1.43
   1   8  -2   93.94    1.30
  -1   8   2   94.87    1.41
   1  -8  -2   82.54    1.42
   1   8  -2   85.95    1.47
   1   8  -2   92.48    1.33
  -3   3 -10    6.72    0.71
  -3  -3 -10    7.62    0.70
   3   3  10    8.69    0.95
  -3  -3 -10    9.03    0.83
  -3   3 -10    8.18    0.85
   3  -3  10    8.16    0.54
  10   0 -12  716.16    4.78
  10   0 -12  726.49    5.51
  10   0 -12  722.27    4.66
  -5   6   9  131.52    1.98
   5  -6  -9  134.70    2.37
   5   6  -9  130.23    1.49
  12   0  -9   -0.10    0.53
  12   0  -9    0.07    0.53
  12   0  -9   -0.08    0.59
   0   8  -2    5.23    0.50
   0  -8  -2    5.13    0.55
   0   8   2    5.85    0.67
   0   8   2    4.68    0.43
   0   8  -2    4.99    0.46
   0   8  -2    5.08    0.62
   0   8  -2    4.96    0.51
  -2   8   1   11.32    0.69
   2   8  -1   11.47    0.60
   2  -8  -1   10.76    0.56
  -2   8   1   10.94    0.69
   2   8  -1   11.38    0.64
   8  -4   4    2.12    0.56
   8  -4   4    2.97    0.44
   8   4   4    3.10    0.91
  -8  -4  -4    2.78    0.58
  -8   4  -4    3.66    0.82
   8   4   4    3.03    0.61
   8   4 -11  147.09    2.11
   8   4 -11  143.49    1.85
   8  -4 -11  153.99    1.99
  -8   4  11  145.65    2.07
   8   4 -11  144.66    2.16
   8  -4 -11  150.44    2.62
   8  -4 -11  155.34    2.00
  -1  -6  -8  408.37    3.50
   1   6   8  429.80    4.45
  -1   6  -8  422.60    3.10
  -1  -6  -8  437.81    4.01
  -1   6  -8  407.50    3.21
  -1  -6  -8  425.30    2.79
   0   4 -11   14.08    0.75
   0  -4 -11   15.74    0.94
   0   4 -11   16.38    0.82
   0  -4 -11   15.97    0.64
  12   2  -3   32.45    1.05
 -12   2   3   32.30    1.20
  12  -2  -3   31.46    0.99
  -7   5  -4  530.20    4.66
   7   5   4  528.55    3.75
   7   5   4  519.65    5.16
   7  -5   4  522.50    3.15
  -4   4  12  325.26    2.93
   4   4 -12  324.06    2.58
   4  -4 -12  321.36    3.30
   4   4 -12  331.39    3.13
   4  -4 -12  325.87    2.60
   5  -2   9   63.69    1.17
   5   2   9   64.77    1.87
   5   2   9   66.08    1.23
  -5   2  -9   64.46    1.77
   5  -2   9   63.46    1.52
  -5  -2  -9   61.69    1.26
   2   8   0    0.30    0.43
  -2   8   0    0.20    0.32
  -2   8   0   -0.02    0.41
  -2   8   0    0.27    0.48
   2   8   0    0.11    0.42
  -2   8   0    0.04    0.49
  11   0 -11   -0.02    0.56
  11   0 -11    0.03    0.66
  11   0 -11   -0.14    0.53
  11   0 -11    0.15    0.49
  11   0 -11   -0.01    0.64
  -7   2  -7  203.30    3.03
   7  -2   7  195.29    2.05
   7   2   7  196.61    3.18
   7  -2   7  195.99    2.74
   7   2   7  197.28    2.20
   5   4 -12   50.88    1.24
   5   4 -12   49.33    1.03
   5  -4 -12   53.31    1.70
  -5   4  12   50.44    1.27
   5  -4 -12   50.98    1.36
   5   4 -12   47.65    1.22
   5   4 -12   51.47    1.30
   5  -4 -12   51.67    1.08
   3  -7  -7  140.77    2.01
   3   7  -7  142.56    1.73
  -3   7   7  144.88    1.85
  -3   7   7  137.55    1.97
   3   7  -7  136.29    1.64
   2  -7  -7    0.45    0.53
   2  -7  -7    0.13    0.43
   2   7  -7    0.17    0.44
   2   7  -7    0.35    0.42
   2   7  -7    0.12    0.50
  -2   7   7    0.79    0.53
  -3   0 -11   -0.16    0.56
   0  -5 -10  163.90    2.60
   0   5 -10  162.23    1.88
   0  -5 -10  163.73    2.03
   0  -5  10  158.71    1.68
   0   5 -10  153.98    1.98
   0   5  10  147.97    2.37
   0  -5 -10  154.03    2.29
   2   8  -2  492.54    3.33
  -2   8   2  481.16    3.38
   2  -2 -13  146.37    1.93
   2   2 -13  144.83    1.94
  -2   2  13  143.92    1.75
   2   2 -13  150.11    1.97
   2  -2 -13  148.86    2.36
   2  -2 -13  145.55    2.21
  11   4  -5   58.21    1.72
  11   4  -5   76.55    1.69
   6  -7  -5   41.94    1.09
   6  -7  -5   42.01    1.02
   6   7  -5   43.27    0.99
  -6   7   5   41.96    0.98
  -6   7   5   45.11    1.23
  10   4  -9  118.62    1.95
  10  -4  -9  113.66    1.82
  10   4  -9  117.34    2.09
  10  -4  -9  115.90    2.13
  10   4  -9  114.27    1.99
  -2   4 -10    1.63    0.58
  -2   4 -10    1.90    0.54
  -2  -4 -10    2.46    0.79
  -2  -4 -10    1.56    0.40
   2  -4  10    1.73    0.41
   2   4  10    1.94    0.75
  -2   4 -10    1.11    0.45
   7  -6  -8    6.46    0.59
  -7   6   8    6.42    0.69
   7  -6  -8    7.10    0.68
   1  -1 -13    0.82    0.55
   1   1 -13    0.47    0.48
   1  -1 -13    0.13    0.49
   1   1 -13    0.32    0.40
  11   3  -9    7.76    0.76
  11  -3  -9    8.18    0.68
  11   3  -9    8.17    0.89
  11   3  -9    9.16    0.82
  11  -3  -9    8.07    0.81
  10  -1 -12   42.02    1.33
  10  -1 -12   37.63    1.04
  10  -1 -12   40.13    1.10
  10   1 -12   40.71    1.24
 -10   1  12   39.15    0.99
  10  -1 -12   37.86    1.22
  10   1 -12   38.83    1.41
  10  -1 -12   37.06    1.32
  10   1 -12   38.18    1.04
  -1   7  -6   88.67    1.41
  -1   7  -6   73.23    1.38
   1   7   6   81.37    1.97
  -1  -7  -6   84.90    1.57
  -1  -7  -6   79.22    1.35
 -11   4   4    5.12    0.76
  11   4  -4    5.02    0.71
  11   4  -4    3.29    0.89
  -9   0  -5   -0.30    0.53
   9   0   5    0.09    0.49
  12  -1  -9   13.38    0.86
  12   1  -9   13.54    0.88
  12   1  -9   13.04    0.90
  12   1  -9   13.42    0.72
  12   1  -9   12.37    0.86
 -10   5   4  207.77    2.70
  10   5  -4  207.93    2.70
   5   7   2   90.61    1.50
   5   7   2   89.69    1.88
  -5   7  -2   90.96    1.46
  -5   7  -2   91.61    1.53
   1  -6  -9   11.76    0.89
   1  -6  -9   12.64    0.76
  -1   6   9   11.45    0.78
   1  -6  -9   14.08    0.67
   1   6  -9   11.48    0.71
   1  -6  -9   12.35    0.77
  10   5  -5   23.28    1.08
  10   5  -5   16.84    1.20
   3   4 -12  206.67    2.38
   3   4 -12  211.36    2.12
  -6   7   0   88.70    1.46
  -6   7   0   90.74    1.56
  11  -4  -6   10.88    0.64
  11  -4  -6   11.32    0.68
  11   4  -6   12.32    0.91
  11   4  -6   10.80    1.03
  -2   5  -9  355.66    2.83
  -2  -5  -9  366.80    3.79
  -2   5  -9  359.85    2.67
  -2  -5  -9  363.30    3.40
   2  -5   9  368.74    2.65
  -1   8  -2  123.08    1.70
  -1   8  -2  124.35    1.60
  -1   8  -2  125.33    1.59
   1   8   2  121.26    1.97
  -1   8  -2  126.58    1.63
   1   8   2  125.98    1.51
   4  -5 -11   61.89    1.40
   4  -5 -11   66.38    1.34
  -4   5  11   66.03    1.33
   4  -5 -11   66.14    1.81
   4   5 -11   64.64    1.11
   4   5 -11   66.07    1.33
   4   5 -11   62.34    1.28
   4  -5 -11   66.59    1.14
  12   2  -8   49.23    1.39
  12   2  -8   46.60    1.44
  12  -2  -8   50.74    1.37
  12  -2  -8   49.65    1.28
  12   2  -8   50.32    1.08
  -7   6  -2  172.03    2.38
   7   6   2  160.14    2.54
   7  -6   2  168.15    1.55
  -7   6  -2  166.97    1.98
  -7   6  -2  165.00    1.82
   7   6   2  165.91    2.05
  11  -1 -11    0.77    0.54
  11   1 -11    0.52    0.54
  11  -1 -11    0.29    0.52
  11   1 -11    0.42    0.48
  11  -1 -11    0.35    0.55
  11   1 -11    0.22    0.60
  11   1 -11    0.56    0.68
   4  -7  -7  100.03    1.69
  -4   7   7   99.67    1.64
   4   7  -7  102.14    1.40
   4   7  -7   99.98    1.40
  -2   8  -1  161.71    1.98
  -2   8  -1  166.61    1.81
  -2   8  -1  167.61    1.71
   2   8   1  166.69    2.18
   2   8   1  162.68    1.81
  -2   8  -1  164.07    1.91
   1   8  -3  287.25    2.46
   1   8  -3  286.00    2.48
   1   8  -3  284.43    2.28
   1  -8  -3  279.42    2.53
   6  -4 -12    0.38    0.73
   6  -4 -12    0.29    0.36
   6   4 -12    0.31    0.52
   6   4 -12    0.43    0.52
   6  -4 -12    0.46    0.35
   6  -4 -12    0.33    0.55
  -6   4  12    0.33    0.55
   1   7  -7    5.75    0.60
   1   7  -7    5.89    0.56
   1  -7  -7    6.34    0.54
   1   7  -7    6.11    0.57
   1  -7  -7    6.48    0.63
  -1   7   7    5.72    0.75
  -3  -1 -11  181.53    2.25
  -3   1 -11  189.69    2.60
  12   0  -1    0.20    0.48
  10  -3   2    0.58    0.55
 -10   3  -2    0.59    0.74
  10   3   2    0.41    0.64
 -10  -3  -2    1.10    0.47
  10  -3   2    0.46    0.29
  10   3   2    0.36    0.48
  10  -5  -3   39.23    0.90
  10   5  -3   42.03    0.90
  10   5  -3   39.68    1.27
 -10   5   3   39.73    1.29
  -5   5  11   15.50    0.81
   5  -5 -11   13.34    0.76
   5  -5 -11   15.42    1.07
   5  -5 -11   16.14    0.77
   5  -5 -11   16.21    0.67
   5   5 -11   14.57    0.73
   5   5 -11   14.36    0.59
   5   5 -11   13.62    0.71
   4   6   6   71.90    2.06
  -4  -6  -6   70.30    1.49
   4  -6   6   68.12    1.25
  -4   6  -6   71.61    1.28
  -4  -6  -6   71.09    1.55
   4   6   6   72.55    1.22
  -4   6  -6   70.09    1.07
   3  -5 -11   25.31    0.87
  -3   5  11   25.52    0.81
   3   5 -11   27.65    0.83
   3   5 -11   26.37    0.95
   3  -5 -11   25.87    0.97
   3  -5 -11   27.30    1.24
   9   0 -13    0.40    0.67
   9   0 -13   -0.19    0.53
   9   0 -13    0.08    0.58
  -9   0  13    0.04    0.44
  -4  -2 -10   15.59    0.72
  -4  -2 -10   17.71    0.93
   4   2  10   17.60    1.10
   4  -2  10   16.38    0.63
   9  -1   5    1.47    0.47
   9   1   5    1.24    0.72
  -9   1  -5    0.91    0.69
   5   3 -13  228.65    2.43
   5  -3 -13  222.39    2.76
  -5   3  13  224.63    2.45
   5  -3 -13  236.11    3.20
   5   3 -13  234.10    2.75
   2   8  -3   10.00    0.62
  -2   8   3   10.29    0.61
   2  -8  -3    9.20    0.56
  -2   8   3   10.18    0.73
  11   4  -3   41.78    1.20
 -11   4   3   39.50    1.32
  11   4  -3   41.73    0.97
 -10   5   6   80.29    1.30
  10  -5  -6   82.55    1.40
   8   6   0   77.00    1.39
  -8   6   0   76.99    1.24
  -8   6   0   79.14    1.37
  -8   6   0   79.92    1.65
   8   6  -7    0.45    0.48
   8   6  -7    2.01    0.56
   8  -6  -7    2.07    0.55
  -8   6   7    2.24    0.60
   8  -6  -7    2.60    0.47
  -5  -6  -5  159.22    2.16
   5  -6   5  166.11    1.96
   5  -6   5  166.48    1.75
   5   6   5  166.58    2.92
   5   6   5  167.51    1.93
  -5   6  -5  161.49    1.84
   6  -6  -9  186.17    2.55
  -6   6   9  186.78    2.28
   0   8  -3  184.44    1.94
   0   8  -3  179.84    1.72
   0   8  -3  192.81    1.99
   0  -8  -3  173.32    2.05
   0   8  -3  189.72    1.94
   8   2   6   25.43    0.89
  -8   2  -6   24.73    1.20
   8  -2   6   24.81    1.09
  -8   2  13   43.72    1.15
   8   2 -13   42.48    1.29
   8  -2 -13   41.33    1.36
   8  -2 -13   43.96    1.37
   8   2 -13   40.58    1.30
  -4   3  13   24.53    0.89
   4  -3 -13   24.49    1.19
   4   3 -13   24.62    0.87
   4   3 -13   24.30    0.99
   4  -3 -13   23.45    1.03
   4   3 -13   25.15    0.97
   3   8  -1   54.24    1.13
  -3   8   1   53.24    1.21
   5   0 -14    0.95    0.56
   5   0 -14    0.91    0.57
   5   0 -14    1.30    0.43
 -10   2  -3   31.26    1.28
  10  -2   3   29.19    0.79
  10  -2   3   28.59    1.09
  10   2   3   30.29    1.25
  10   2   3   30.78    0.92
  -3   8   2  202.41    2.26
   3  -8  -2  203.90    1.96
   3   8  -2  203.45    2.09
  -3   8   2  208.27    2.24
  -1  -2 -12   35.46    1.09
  -1  -2 -12   37.02    1.18
  -1   2 -12   36.08    1.15
  12  -2  -2   47.68    1.09
  12   2  -2   50.43    1.21
 -12   2   2   51.84    1.43
  11   2   1    6.05    0.52
 -11   2  -1    6.14    0.75
  11  -2   1    6.06    0.64
  11   2   1    6.34    0.63
  -3   6  -7  134.50    1.54
  -3   6  -7  128.22    1.67
  -3  -6  -7  131.73    1.96
   3   6   7  130.84    2.59
  -3  -6  -7  129.71    2.09
  11  -4  -7   32.20    1.04
  11  -4  -7   31.29    0.97
  12   1  -1   46.73    1.19
  12  -1  -1   44.91    1.11
   6   0 -14   41.09    1.31
   6   0 -14   44.97    1.05
   6   0 -14   41.17    1.18
  -6   3  13   11.67    0.75
   6  -3 -13   12.53    1.02
   6   3 -13   11.40    0.79
   6   3 -13   10.42    0.73
   6  -3 -13   11.58    0.86
   0  -3 -12  103.75    1.99
   0   3 -12  100.66    1.56
   0  -3 -12   99.76    1.77
   0   3 -12  101.66    1.55
   4   0 -14   82.23    1.61
   4   0 -14   82.00    1.62
   9  -1 -13   37.15    1.15
  -9  -1  13   35.68    0.95
  -9   1  13   35.42    1.00
   9   1 -13   33.88    1.13
   9  -1 -13   36.66    1.28
   9   1 -13   32.32    1.07
   9  -1 -13   38.83    1.08
  -3   8   0   73.53    1.40
   3   8   0   73.33    1.25
  -3   8   0   68.68    1.10
  -3   8   0   72.10    1.30
   3   8   0   72.89    1.30
  -9   3  -4  114.13    2.25
  -9  -3  -4  113.39    1.66
   9   3   4  112.90    2.32
  10   3 -11  382.64    3.70
  10   3 -11  369.06    2.93
  10  -3 -11  372.10    3.15
  10  -3 -11  389.04    3.84
  10   3 -11  381.38    3.44
 -10   3  11  360.50    2.88
   2   4 -12  130.52    1.83
   2   4 -12  126.79    1.85
   2  -4 -12  124.20    2.10
   2   4 -12  133.85    1.73
   6  -7  -6  110.17    1.69
   6  -7  -6  111.30    1.59
   6   7  -6  110.22    1.39
   9   5   1    0.48    0.47
  -9  -5  -1    0.70    0.54
  -9   5  -1    0.41    0.58
   9  -5   1    0.74    0.45
  -2   3 -11  499.82    3.40
  -2   3 -11  496.12    3.87
  -2  -3 -11  507.19    4.29
  11   3   0   83.37    1.27
  11  -3   0   81.44    1.48
 -11   3   0   85.43    1.89
 -11  -3   0   83.03    1.51
  12  -3  -5  261.13    2.49
 -12   3   5  265.22    2.97
  12   3  -5  255.65    2.32
  10  -5  -2  751.08    4.10
  10   5  -2  745.18    3.92
 -10   5   2  754.52    5.17
   6   5 -11   29.39    0.85
   6  -5 -11   30.20    0.95
  -6   5  11   28.62    0.97
   6  -5 -11   28.83    0.86
   6  -5 -11   29.99    1.27
   5   1 -14   19.33    0.87
   5   1 -14   22.15    0.83
  -5   1  14   21.79    0.90
   5   1 -14   21.38    0.95
   5  -1 -14   20.29    0.98
   5  -1 -14   20.36    0.82
   2  -5 -11  181.87    2.70
   2   5 -11  180.65    1.86
   2  -5 -11  172.05    2.27
   2   5 -11  158.24    1.93
   2  -5 -11  181.03    2.01
   2   5 -11  164.11    2.07
   3  -8  -3  562.52    3.47
   3   8  -3  562.58    3.50
  -3   8   3  563.45    3.81
  -3   8   3  571.62    3.70
   5  -7  -7  119.29    1.80
   5   7  -7  122.71    1.45
   5   7  -7  122.84    1.40
   5  -7  -7  126.70    1.75
  -5   7   7  122.70    1.80
   8  -5   3  169.63    1.56
   8   5   3  169.46    2.00
   8   5   3  164.54    2.69
  -8   5  -3  169.61    2.54
  -8   5  10   32.63    1.06
   8  -5 -10   29.96    1.18
   8  -5 -10   32.89    1.03
   3  -3 -13   97.65    1.98
   3   3 -13   93.73    1.51
   3   3 -13   94.86    1.58
  -3   3  13   94.47    1.41
   3   3 -13   96.82    1.74
   3  -3 -13   91.77    1.79
  12   3  -6  146.52    1.63
  12  -3  -6  150.73    1.88
  12  -3  -6  151.69    2.00
  -6  -6  -4   52.56    1.30
   6   6   4   56.12    1.17
  -6   6  -4   52.79    1.02
   6  -6   4   52.58    1.15
   6  -6   4   56.23    0.99
   6   6   4   52.33    1.67
  12   0 -10   33.40    1.02
  12   0 -10   35.64    1.17
  12   0 -10   32.81    1.06
  -2   8  -2   12.00    0.58
   2   8   2   12.50    0.74
  -2   8  -2   11.86    0.57
  -2   8  -2   12.37    0.61
   2   8   2   11.45    0.55
  -2   8  -2   12.15    0.69
  -6  -4  -7   28.62    0.99
   6  -4   7   27.85    0.81
   6   4   7   29.92    0.90
  -6   4  -7   30.32    1.24
   6  -4   7   28.10    1.00
   6   4   7   29.53    1.48
   5  -4   8  239.66    2.10
  -5  -4  -8  227.90    2.54
   5   4   8  237.93    2.15
  -5  -4  -8  231.19    2.96
  -5   4  -8  243.36    2.96
   5  -4   8  234.01    2.46
   5   4   8  241.23    3.44
   3   7   5    2.72    0.38
  -3  -7  -5    2.49    0.49
  -3  -7  -5    2.65    0.47
  -3   7  -5    2.84    0.45
  -3   7  -5    2.80    0.52
   9  -5  -9    7.58    0.70
   9  -5  -9    8.40    0.59
  -9   5   9    8.04    0.62
   9   5  -9    7.76    0.59
   9   5  -9    7.36    0.70
   9   5  -9    7.81    0.55
   0   7   7  142.74    2.25
   0  -7  -7  147.51    1.98
   0  -7  -7  141.35    1.68
   6   1 -14   87.39    1.68
   6   1 -14   89.76    1.70
   6  -1 -14   88.83    1.49
  -7   4  12   11.05    0.71
   7  -4 -12   14.59    1.03
   7  -4 -12   13.71    0.61
   7   4 -12   11.47    0.70
   7   4 -12   13.06    0.75
   7  -4 -12   13.64    0.77
   7  -4 -12   13.69    0.62
  -4  -7  -4   51.69    1.13
  -4   7  -4   54.96    1.04
  -4  -7  -4   49.97    1.13
  -4   7  -4   53.29    1.17
   4   7   4   54.84    1.58
   4   7   4   55.27    1.08
  -1   8  -3   47.61    1.00
  -1  -8  -3   43.47    1.03
  -1   8  -3   43.30    0.95
   1   8   3   43.35    1.25
  -1   8  -3   44.93    0.88
  -1   8  -3   44.97    1.04
  11   0   2   14.05    0.60
  11   0   2   14.99    0.71
  11   0   2   14.20    0.87
  -7   7   3   68.36    1.34
   7   7  -3   67.48    1.19
  -7   7   3   66.26    1.16
  10   5  -7    1.39    0.58
  10   5  -7    0.99    0.62
 -10   5   7    1.18    0.42
  10  -5  -7    1.30    0.43
  -6  -7  -1    1.10    0.42
  -6   7  -1    1.92    0.41
   6   7   1    1.67    0.43
  -6   7  -1    1.77    0.49
   6   7   1    1.80    0.50
   0   6   9   68.15    1.57
   0  -6  -9   72.40    1.40
   0   6  -9   71.71    1.30
   0   6  -9   69.74    1.25
   0  -6  -9   69.43    1.61
   0  -6  -9   68.22    1.41
   9  -3 -12   35.97    0.98
   9   3 -12   33.45    0.97
  -9   3  12   35.43    1.01
   9  -3 -12   36.26    1.09
   9   3 -12   35.39    1.12
   9   3 -12   34.69    1.18
  10   4   1   14.28    0.68
 -10  -4  -1   15.98    0.83
  10  -4   1   16.75    0.77
 -10   4  -1   14.38    0.99
   1   2 -13  223.76    2.22
   1  -2 -13  223.76    2.67
   1   2 -13  222.57    2.35
   1  -2 -13  224.50    2.22
   1  -2 -13  218.56    2.52
  12   3  -4    9.24    0.57
  12  -3  -4    7.92    0.54
  12   3  -4    6.66    0.76
 -12   3   4    9.78    0.80
  12   3  -4   10.39    0.72
   9  -4   3  183.70    1.62
   9   4   3  181.70    2.76
   4   1 -14    0.66    0.53
   4  -1 -14    0.60    0.47
  -4   1  14    1.40    0.51
   4  -1 -14    0.90    0.59
   4   1 -14    0.88    0.44
   4   1 -14    0.64    0.39
  10   2 -12    0.06    0.56
  10  -2 -12    0.21    0.43
  10  -2 -12    0.51    0.58
  10  -2 -12    0.11    0.51
 -10   2  12    0.42    0.43
  10   2 -12    0.23    0.58
  11   4  -2  186.91    2.25
 -11   4   2  185.90    2.59
  12  -2  -9   52.23    1.28
  12   2  -9   51.63    1.42
  12   2  -9   51.92    1.37
  12  -2  -9   51.89    1.35
   0   0 -13   -0.10    0.51
   7   0 -14  198.36    2.63
   7   0 -14  196.18    2.32
  -7   0  14  191.45    2.22
   7   0 -14  192.38    2.07
   9   6  -4   55.51    1.46
   9   6  -4   57.38    0.98
  -9   6   4   53.64    1.08
  -9   6   4   55.16    1.33
   1  -8  -4  116.66    1.54
   1   8  -4  124.48    1.58
   1   8  -4  131.06    1.59
  -1   8   4  126.28    1.92
   1   8  -4  122.81    1.47
   1  -8  -4  118.87    1.63
   2  -8  -4    0.38    0.38
  -2   8   4    0.59    0.36
  -2   8   4    0.77    0.51
   2   8  -4    0.54    0.41
  -7   7   4   19.47    0.67
  -7   7   4   20.49    0.83
   7   7  -4   19.57    0.69
  -7   7   2  134.23    1.78
  -7   7   2  130.48    1.62
   7   7  -2  134.28    1.68
  -2   0 -12  936.33    5.37
  -3   8  -1   88.81    1.18
   3   8   1   84.19    1.47
  -3   8  -1   87.52    1.37
  -3   8  -1   86.81    1.44
   3   8   1   86.41    1.29
   9   6  -3   27.77    0.76
  -9   6   3   26.17    0.72
   9   6  -3   27.31    1.11
  -9   6   3   27.42    1.01
  -9   6   3   27.52    0.79
  11   2 -11    7.43    0.67
  11   2 -11    6.19    0.67
  11   2 -11    6.18    0.78
  11  -2 -11    6.35    0.61
  11   2 -11    6.89    0.61
   7   3 -13    6.57    0.56
   7  -3 -13    8.66    0.75
  -7   3  13    9.53    0.68
   7  -3 -13    8.76    0.86
   7   3 -13    9.02    0.73
   3   0 -14  231.03    2.59
   3   0 -14  236.91    2.47
  12  -3  -7   20.69    0.81
  12   3  -7   21.88    1.01
  12  -3  -7   20.92    0.87
  12   3  -7   20.21    1.03
  12   1 -10    2.95    0.65
  12  -1 -10    3.21    0.60
  12   1 -10    3.42    0.62
  12   1 -10    3.63    0.61
  12  -1 -10    2.71    0.54
  12   1 -10    2.86    0.42
  -9   6   5   27.06    0.97
  -9   6   5   29.99    0.89
   9   6  -5   28.62    1.09
   9   6  -5   26.66    0.62
  -2  -6  -8  210.02    2.60
  -2  -6  -8  205.68    2.25
  -2   6  -8  206.67    2.11
  -2  -6  -8  206.25    2.36
  -2   6  -8  219.24    1.94
   2   6   8  216.20    3.00
  -2   7  -6  145.52    1.80
  -2  -7  -6  138.52    1.83
  -2  -7  -6  132.77    1.72
  -2  -7  -6  128.91    1.61
   2   7   6  146.66    2.44
  -2   7  -6  133.68    1.58
  -5  -5  -7   12.91    0.85
  -5  -5  -7   10.54    0.71
   5   5   7   13.32    0.60
   5  -5   7   12.87    0.68
   5   5   7   12.43    1.11
  -5   5  -7   12.43    0.76
   5  -5   7   13.00    0.60
  -7   4  -6    8.52    0.86
   7  -4   6    9.76    0.74
  -7  -4  -6    8.52    0.63
   7   4   6    8.50    0.61
   7  -4   6    8.24    0.52
  -3  -2 -11  252.21    2.74
  -3  -2 -11  248.02    2.22
   9   4 -11  217.94    2.43
   9   4 -11  199.99    2.42
  -9   4  11  202.66    2.20
   9  -4 -11  212.92    2.85
   9  -4 -11  214.27    2.26
   9   4 -11  197.72    1.98
  13   0  -6  278.11    2.72
  -4  -4  -9   62.27    1.35
  -4   4  -9   64.78    1.49
   4  -4   9   61.06    1.06
  -4  -4  -9   59.49    1.50
   4   4   9   61.22    1.77
  -4  -4  -9   57.72    1.06
  -1   5 -10    0.08    0.43
  -1   5 -10    0.04    0.47
  -1  -5 -10    0.01    0.39
  -1  -5 -10    0.22    0.54
   1   5  10   -0.09    0.56
   1  -5  10    0.11    0.34
  -1  -5 -10    0.24    0.61
  -1   4 -11   20.10    0.66
   1  -4  11   22.29    0.61
  -1   4 -11   21.34    0.76
  11   3 -10    0.23    0.50
  11  -3 -10    0.38    0.57
  11  -3 -10    0.43    0.49
  11   3 -10    0.40    0.55
  11   1   2   20.18    0.96
  11  -1   2   18.16    0.58
 -11   1  -2   19.84    0.95
  11  -1   2   19.75    0.91
  11   1   2   18.78    0.68
  13   0  -5   -0.17    0.41
  13   0  -5    0.03    0.46
  10   0   4  162.29    1.81
  10   0   4  174.31    2.53
  11  -4  -8 1070.12    5.71
  11  -4  -8 1040.41    5.37
   6   3   8    1.04    0.83
   6   3   8    0.41    0.41
   6  -3   8    0.73    0.40
  -6  -3  -8    0.73    0.42
   6  -3   8    1.11    0.53
  -5   7  -3    0.94    0.38
   5   7   3    1.34    0.43
   5   7   3    0.88    0.61
  -5  -7  -3    0.65    0.39
  -5   7  -3    0.59    0.44
   9  -2   5  443.22    3.93
  -9   2  -5  451.99    4.18
   9  -2   5  455.79    2.96
   9   2   5  451.14    4.38
  10   4 -10   49.24    1.22
  10   4 -10   48.60    1.30
 -10   4  10   46.10    1.04
  10   4 -10   47.05    1.11
  10  -4 -10   48.36    1.16
  10  -4 -10   48.37    1.35
  -6   5  -6   48.81    1.35
   6  -5   6   45.26    1.12
   6  -5   6   48.65    0.96
   6   5   6   47.77    1.03
  -6   0  -9    0.42    0.51
   6   0   9    0.01    0.59
   6   0   9    0.49    0.41
   0  -1 -13    0.77    0.36
   0  -1 -13    0.66    0.45
   0  -8  -4    4.31    0.50
   0   8  -4    5.10    0.49
   0   8   4    4.17    0.59
   0   8  -4    5.02    0.49
   0   8  -4    5.70    0.54
   0  -8  -4    5.21    0.45
   7   1 -14  134.67    2.10
   7   1 -14  130.71    1.96
   7  -1 -14  123.53    1.67
   7  -1 -14  106.68    1.99
   7   1 -14  105.05    1.58
  -7   1  14  127.19    1.79
   4  -6 -10   40.61    1.32
   4  -6 -10   40.63    1.07
   4   6 -10   38.09    0.84
   4   6 -10   38.27    0.81
  -4   6  10   39.86    0.97
   4  -6 -10   40.19    0.92
   4   8  -2    0.00    0.38
  -4   8   2    0.12    0.41
   4   8  -2    0.60    0.41
  -4   8   2    0.06    0.45
   3   8  -4    9.64    0.56
  -3   8   4    9.65    0.59
  -3   8   4    9.27    0.63
   3   8  -4   10.63    0.59
   3  -8  -4    8.84    0.54
   7   0   8  215.34    2.87
  -7   0  -8  223.01    2.54
  -4  -5  -8  608.22    4.19
   4  -5   8  598.85    3.36
  -4  -5  -8  588.12    4.44
   4   5   8  579.43    5.17
   3   6 -10   94.92    1.32
   3  -6 -10  104.55    1.35
   3  -6 -10  104.99    1.95
   3   6 -10  107.29    1.37
   3   6 -10   96.25    1.45
   3  -6 -10  106.00    1.61
  12   3  -3   67.93    1.33
 -12   3   3   66.88    1.55
  12   3  -3   69.22    1.24
  13   0  -7   -0.10    0.49
  13   0  -7    0.24    0.46
   7  -6  -9  148.75    2.06
  -7   6   9  147.89    1.96
   7  -6  -9  151.84    1.96
   4   8  -1  144.18    1.66
  -4   8   1  129.50    1.63
   7   7  -5    2.44    0.39
   7  -7  -5    2.12    0.40
  -7   7   5    2.25    0.36
  -7   7   5    2.57    0.56
  -8   6  -1   73.49    1.50
  -8  -6  -1   64.79    1.34
  -8   6   8   18.22    0.80
   8  -6  -8   16.88    0.73
   8  -6  -8   17.82    0.81
   5   3   9   44.70    1.53
  -5  -3  -9   40.92    1.05
  -5   3  -9   45.32    1.35
  -5  -3  -9   43.83    1.29
   5   3   9   41.09    0.87
   5  -3   9   42.65    0.90
  -2   1 -12  409.91    3.49
  -2  -1 -12  428.10    3.24
   3   1 -14   16.00    0.64
   3  -1 -14   15.75    0.82
   3   1 -14   15.39    0.84
  -3   1  14   13.86    0.66
   3  -1 -14   14.27    0.72
   3   1 -14   13.76    0.64
  -7   3  -7   16.02    1.00
   7   3   7   18.72    0.72
   7   3   7   17.57    1.19
   7  -3   7   14.35    0.62
   7  -3   7   17.91    0.86
  -7  -3  -7   16.16    0.67
  -7  -7   1    0.25    0.36
  -7   7   1    0.19    0.41
  -7   7   1    0.57    0.35
  12   0   0   57.86    1.18
   3   7  -8  251.78    2.12
  -3   7   8  253.93    2.07
   3  -7  -8  256.98    2.53
   9   6  -2    1.20    0.39
  -9   6   2    1.04    0.34
  -9   6   2    1.51    0.51
   9   6  -2    1.01    0.57
  13  -1  -6   76.22    1.38
  13   1  -6   77.60    1.47
  13  -1  -6   79.14    1.45
  13   1  -6   79.80    1.41
 -10   5   1   56.82    1.45
  10   5  -1   58.06    1.06
   2  -3 -13   11.25    0.85
   2   3 -13   10.96    0.73
   2   3 -13   10.42    0.67
 -12   2   1    1.26    0.57
   7  -5 -11  346.81    2.84
   7  -5 -11  351.26    2.72
   7   5 -11  348.06    2.40
  -4   8   3    0.52    0.47
   4   8  -3    0.15    0.41
  -4   8   3    0.16    0.39
   4  -8  -3    0.53    0.36
   4   8  -3    0.72    0.40
  13   0  -4    1.14    0.50
  13   1  -5  282.55    2.68
  13  -1  -5  278.72    2.65
  13   1  -5  277.24    2.61
   1   5 -11    9.90    0.63
   1  -5 -11   11.20    0.71
   1  -5 -11   11.62    0.90
   1  -5 -11   10.46    0.56
   1   5 -11    9.63    0.67
   9   6  -6    8.72    0.70
   9  -6  -6    8.80    0.54
  -9   6   6    8.02    0.58
  10  -1   4   77.82    1.21
 -10   1  -4   82.58    1.69
  10   1   4   78.53    1.29
  10  -1   4   85.84    1.74
  10   1   4   81.46    1.82
   9  -2 -13   12.26    0.54
   9   2 -13   12.01    0.81
   9  -2 -13   12.72    0.83
   9  -2 -13   12.92    0.79
   9   2 -13   14.21    0.81
  -9   2  13   13.22    0.67
   1   4 -12  146.98    1.93
   1  -4 -12  146.04    2.05
  -7  -6  -3    6.79    0.62
   7  -6   3    6.25    0.55
   7   6   3    6.77    0.75
   7   6   3    6.73    0.56
  -7   6  -3    5.94    0.58
   7  -6   3    6.22    0.39
  11   0 -12    0.57    0.44
  11   0 -12    0.76    0.48
  11   0 -12    0.38    0.58
  11   0 -12    0.36    0.55
  11   0 -12    0.65    0.39
   5   6 -10  117.30    1.22
   5  -6 -10  120.36    1.56
  -5   6  10  117.14    1.64
   5  -6 -10  121.33    1.72
   5  -6 -10  122.84    2.06
  -5   0 -10  385.51    3.29
   5   0  10  379.80    3.55
   2  -7  -8  110.85    1.65
   2   7  -8  107.63    1.41
   2   7  -8  106.89    1.43
   2  -7  -8  115.32    1.57
  -2   7   8  102.96    1.59
   6  -1   9   91.78    1.29
   6   1   9   91.66    1.30
   6   1   9   88.46    1.89
   6  -1   9   88.21    1.74
   7   1   8   15.06    0.66
   7   1   8   15.80    0.99
   7  -1   8   14.94    0.64
   7  -1   8   16.40    0.90
  -7   1  -8   16.54    0.91
   4  -7  -8  115.03    1.69
  -4   7   8  113.44    1.54
  -4   7   8  110.64    1.38
   4   7  -8  116.27    1.33
   4   7  -8  110.97    1.33
   6  -7  -7   77.97    1.38
   6   7  -7   77.37    1.04
   6  -7  -7   79.97    1.31
   5   2 -14   21.65    0.93
   5  -2 -14   24.47    0.97
  -5   2  14   22.10    0.82
   5   2 -14   22.81    0.82
   2   8   3    0.14    0.47
  -2   8  -3    0.08    0.43
  -2   8  -3    0.25    0.29
  -2   8  -3    0.32    0.39
   2   8   3    0.19    0.27
  -2   8  -3   -0.01    0.36
  13   1  -7   44.79    1.05
  13  -1  -7   45.96    1.14
  13  -1  -7   45.17    1.11
  13   1  -7   44.95    1.17
  12   3  -8  149.91    2.24
  12  -3  -8  155.80    2.00
  12  -3  -8  154.80    1.93
   4   8   0    4.86    0.46
  10  -5  -8  117.05    1.62
  10   5  -8  110.81    1.73
 -10   5   8  114.58    1.51
  10  -5  -8  113.91    1.59
   2   6 -10    0.18    0.44
   2   6 -10    0.45    0.45
   2   6 -10    0.08    0.40
   2  -6 -10    0.16    0.40
   2  -6 -10    0.48    0.58
   2  -6 -10   -0.23    0.40
  -8   0  -7    0.26    0.43
   8   0   7   -0.30    0.42
   8   0   7   -0.38    0.65
   8   0 -14  403.77    3.17
  -8   0  14  401.96    3.00
   7  -5   5   37.64    0.81
   7   5   5   37.58    1.42
   7   5   5   38.19    0.93
  -7   5  -5   40.18    1.26
   7  -5   5   36.59    1.01
  12  -1   0   69.76    1.18
  12   1   0   74.37    1.32
  10   0 -13    0.16    0.42
  10   0 -13    0.47    0.55
  10   0 -13    0.51    0.59
  -1   7  -7    0.50    0.43
  -1  -7  -7    0.48    0.30
  -1   7  -7    0.43    0.43
  -1  -7  -7    0.43    0.42
   1   7   7    0.75    0.56
  11   4  -1   37.14    0.77
 -11   4   1   39.66    1.27
   6   2 -14   67.84    1.43
   6  -2 -14   69.43    1.48
   6   2 -14   65.51    1.25
   6  -2 -14   67.32    1.52
   3   8   2    1.08    0.35
   3   8   2    1.09    0.46
  -3   8  -2    1.42    0.35
  -3   8  -2    1.38    0.36
   8  -4   5    8.68    0.70
   8   4   5    8.91    0.60
  -8   4  -5    8.47    0.84
  -8  -4  -5    7.36    0.60
   8  -4   5    8.55    0.48
   8   4   5    8.62    0.91
  13  -1  -4   87.25    1.43
  -8   4  12    7.73    0.61
   8  -4 -12    8.00    0.79
   8   4 -12    7.49    0.54
   8  -4 -12    7.40    0.51
   8   4 -12    7.08    0.60
  13   0  -8   70.18    1.32
  13   0  -8   72.80    1.44
   3   4  10  254.88    3.09
  -3   4 -10  258.17    2.49
   3  -4  10  263.32    2.01
  -3  -4 -10  265.37    2.75
   4   2 -14   92.34    1.41
  -4   2  14   87.94    1.37
   4  -2 -14   90.51    1.68
   4  -2 -14   86.47    1.62
  -4   3 -10    2.99    0.60
  -4  -3 -10    2.62    0.63
   4   3  10    2.26    0.67
  -4  -3 -10    1.93    0.45
   4  -3  10    2.95    0.39
  11  -1 -12    1.70    0.47
  11   1 -12    1.90    0.52
  11   1 -12    1.37    0.60
  11  -1 -12    1.48    0.52
  11   1 -12    1.15    0.41
  11  -1 -12    1.48    0.49
  -3   5  -9    2.12    0.45
  -3  -5  -9    2.36    0.52
  -3   5  -9    1.77    0.37
  -3  -5  -9    2.61    0.60
   3   5   9    2.09    0.70
   3  -5   9    2.45    0.40
  -3  -5  -9    2.17    0.43
  -1   8  -4    4.29    0.45
  -1   8  -4    4.49    0.48
  -1  -8  -4    3.81    0.41
  -1   8  -4    4.26    0.50
  -1  -8  -4    4.15    0.48
  -5   1 -10  240.64    2.70
   5   1  10  232.94    2.86
  -5  -1 -10  237.79    2.20
   5  -1  10  234.93    1.95
  -2   0  14  352.47    2.60
   2  -8  -5   59.90    1.13
   2  -8  -5   59.10    1.09
   2   8  -5   54.48    0.85
  -2   8   5   63.97    1.27
   2   8  -5   53.09    1.02
   2   8  -5   59.95    1.04
   8  -3   6    8.81    0.51
  -8  -3  -6    7.10    0.48
  -8   3  -6   10.18    0.85
   8  -3   6    8.32    0.66
   8   3   6    9.06    0.58
   8   3 -13  568.44    3.92
   8  -3 -13  584.66    4.52
  -8   3  13  555.71    3.59
   8  -3 -13  565.71    3.98
   8   3 -13  480.94    3.49
   8   3 -13  466.58    3.27
  -4   8   4  145.24    1.69
  -4   8   4  153.74    1.80
   4   8  -4  140.34    1.42
   4  -8  -4  156.74    1.72
   6   7   2   52.68    1.06
   6   7   2   46.91    1.11
  -6  -7  -2   44.43    1.02
  -6   7  -2   50.27    1.02
  10  -3   3  155.93    1.42
 -10  -3  -3  159.10    1.73
  10   3   3  167.60    2.38
 -10   3  -3  185.97    2.57
  10  -3   3  178.19    2.18
  10   3   3  173.99    1.85
   7  -7  -6   26.51    0.77
   7  -7  -6   27.09    0.81
  -7   7   6   26.90    0.89
   7   7  -6   26.06    0.62
   8  -1   7   24.54    0.75
   8  -1   7   23.74    1.03
  -8   1  -7   24.84    0.98
   8   1   7   23.85    0.78
   8   1   7   26.75    1.18
   8  -1 -14  211.79    2.60
   8   1 -14  206.97    2.12
   8  -1 -14  192.53    1.91
  -8   1  14  204.70    2.09
  -8  -1  14  208.40    2.10
   8   1 -14  198.72    2.48
   8   1 -14  211.48    2.37
  -1   7   8   13.82    0.73
   1  -7  -8   15.86    0.62
   1   7  -8   13.68    0.64
   1   7  -8   13.90    0.64
   1  -7  -8   15.04    0.71
   1  -8  -5  106.34    1.46
   1   8  -5  109.92    1.40
   1   8  -5  100.65    1.26
   1  -8  -5   97.68    1.39
  -1   8   5  103.79    1.62
   1   8  -5  110.10    1.38
  12  -2 -10  190.72    2.20
  12   2 -10  195.18    2.31
  12   2 -10  193.22    2.48
  -1   6  -9   49.71    1.04
  -1  -6  -9   50.14    1.30
  -1  -6  -9   51.24    1.09
  -1  -6  -9   47.74    1.16
   1   6   9   48.42    1.31
  -1   6  -9   50.52    0.95
  -1   3 -12   86.06    1.37
  -1  -3 -12   86.22    1.66
  13   0  -3   -0.06    0.43
  12   3  -2   37.33    0.94
 -12   3   2   37.76    1.19
 -11  -3  -1    2.33    0.40
  11  -3   1    3.06    0.49
  11   3   1    2.74    0.41
 -11   3  -1    2.79    0.67
  -9   5  -2  168.94    2.38
  10   1 -13  102.41    1.62
  10  -1 -13  105.45    1.59
  10  -1 -13   88.58    1.24
  10  -1 -13   87.18    1.48
 -10   1  13   96.99    1.31
  10  -1 -13  101.23    1.77
  10   1 -13   94.82    1.78
   9  -6  -1  221.33    2.04
   9   6  -1  225.27    2.00
  -9   6   1  219.99    2.45
  -7   7   0    0.24    0.38
   7   7   0    0.57    0.41
  -7  -7   0    0.53    0.37
  -7   7   0    0.36    0.35
   5   7  -8  119.78    1.23
   5   7  -8  119.58    1.19
   5  -7  -8  119.97    1.69
  -5   7   8  120.31    1.60
  11   2   2    1.19    0.37
  11  -2   2    0.91    0.48
 -11   2  -2    1.42    0.58
  -3   8   5  153.31    1.60
   3   8  -5  162.83    1.58
   3  -8  -5  143.89    1.64
  -3   8   5  153.03    1.80
   3  -8  -5  162.85    1.82
   6  -6 -10   63.79    1.14
   6  -6 -10   61.07    1.23
  -6   6  10   63.67    1.25
   6  -6 -10   63.99    1.41
  13  -1  -8    1.84    0.48
  13   1  -8    1.37    0.40
  13  -1  -8    1.67    0.48
  13   1  -8    1.54    0.52
  13   1  -8    1.60    0.48
  12   0 -11    0.16    0.42
  12   0 -11   -0.06    0.36
  12   0 -11    0.11    0.45
  12   0 -11    0.13    0.47
  11  -4  -9   14.44    0.70
  11  -4  -9   13.13    0.71
  11   4  -9   13.14    0.80
  11   4  -9   13.26    0.75
   9  -6  -7  274.90    2.30
   9   6  -7  272.66    2.63
  -9   6   7  270.82    2.34
  -4   0 -11   -0.06    0.45
   0  -2 -13    4.82    0.51
   0  -2 -13    5.41    0.45
   0   2 -13    5.16    0.51
   0  -2 -13    4.57    0.52
   0   2 -13    3.55    0.45
   2  -1 -14  109.51    1.47
   2   1 -14  101.46    1.43
   2  -1 -14  103.24    1.53
   2  -1 -14  111.88    1.62
   7   2 -14   19.85    0.87
   7  -2 -14   19.89    0.86
   7  -2 -14   19.65    0.90
   7   2 -14   17.53    0.73
  -7   2  14   20.02    0.79
  -9   5  10  832.83    4.32
   9  -5 -10  849.59    4.89
   4   8   1  121.67    1.46
   4   8   1  127.61    1.50
  -4   8  -1  137.86    1.69
  -4   8  -1  137.29    1.59
  -2  -2 -12   61.18    1.00
  -2  -2 -12   59.33    1.20
   5   6   6  261.33    2.01
  -5   6  -6  239.78    1.90
  -5  -6  -6  249.01    2.45
   5  -6   6  247.53    2.16
   5  -6   6  255.25    1.96
  -5  -6  -6  234.34    2.39
   3  -2 -14   87.74    1.50
   3   2 -14  100.26    1.38
  -3   2  14   91.97    1.22
   3  -2 -14   99.69    1.67
   1   6 -10  167.65    1.66
  -1  -6  10  169.16    1.46
   1  -6 -10  182.55    1.91
   1   6 -10  164.57    1.81
   1  -6 -10  158.88    1.87
   1  -6 -10  176.00    2.31
  13   1  -3    9.21    0.59
  13  -1  -3    8.84    0.55
   4  -6   7   91.93    1.20
  -4  -6  -7   86.52    1.44
   4   6   7   90.08    1.91
  -4   6  -7   85.66    1.16
  13  -2  -6    4.39    0.48
  13   2  -6    4.42    0.45
 -13   2   6    4.47    0.52
  13   2  -6    4.66    0.57
  10   4   2   67.37    1.13
 -10  -4  -2   67.69    1.25
   9   0   6   46.19    1.35
   0   8  -5    7.22    0.53
   0  -8  -5    6.15    0.46
   0   8  -5    6.64    0.51
   0   8  -5    6.40    0.49
   0   8   5    7.39    0.61
  13   2  -5  252.32    2.22
  13   2  -5  255.74    2.45
  10   2   4   28.88    0.80
  10  -2   4   32.07    1.04
  10   2   4   31.90    1.16
  10  -2   4   29.68    0.72
  12   1 -11    8.80    0.61
  12  -1 -11    9.85    0.64
  12  -1 -11    9.61    0.64
  12   1 -11    8.87    0.64
  12   1 -11    9.89    0.72
  10   5   0   44.28    0.89
  10  -5   0   43.88    0.96
 -10   5   0   43.98    1.24
  -5   8   2    5.15    0.44
   5   8  -2    4.91    0.44
   1   3 -13  274.43    2.38
   1  -3 -13  315.88    3.06
   1  -3 -13  313.91    2.87
   1   3 -13  255.10    1.90
   1   3 -13  295.61    2.66
   4   7   5   41.82    1.28
  -4  -7  -5   38.62    0.91
  -4   7  -5   40.99    0.90
   4   7   5   39.83    0.75
  -4  -7  -5   36.52    0.89
   4  -7   5   39.28    0.82
  10   3 -12    1.47    0.48
  10   3 -12    1.26    0.50
 -10   3  12    1.34    0.40
  10   3 -12    0.73    0.40
  10  -3 -12    1.11    0.40
   5   4 -13   13.05    0.64
   5  -4 -13   14.03    0.75
  -5   4  13   12.56    0.60
   5   4 -13   13.21    0.65
  12  -3  -9  335.27    2.86
  12   3  -9  313.47    2.89
  12   3  -9  318.17    3.09
  12  -3  -9  333.30    2.73
  -4  -1 -11   19.88    0.68
  -4   1 -11   23.07    0.90
   6  -2   9   37.02    1.06
   6   2   9   36.24    0.80
  -6  -2  -9   36.23    1.01
   6   2   9   38.63    1.31
   6  -2   9   35.71    0.80
  -6   2  -9   37.70    1.17
  -5   8   3    8.66    0.49
   5   8  -3    4.36    0.35
  13   0  -9    0.01    0.38
  13   0  -9   -0.04    0.47
  -8   5  -4    0.51    0.57
   8   5   4   -0.16    0.57
   8  -5   4    0.01    0.26
   8   5   4    0.21    0.40
   8  -5   4    0.09    0.41
  -8  -5  -4    0.36    0.41
  -7   2  -8   49.68    1.33
   7  -2   8   46.36    0.91
   7   2   8   48.78    1.45
   7  -2   8   43.39    1.19
   7   2   8   46.18    0.94
   8  -5 -11   66.06    1.46
   8  -5 -11   67.76    1.17
  -8   5  11   65.50    1.23
   3   7   6   59.07    1.45
  -3   7  -6   55.61    1.02
  -3   7  -6   60.61    0.89
  -3  -7  -6   53.07    1.03
  -3  -7  -6   55.64    1.09
   4  -4 -13   59.89    1.31
  -4   4  13   57.75    0.99
  -1   0 -13    0.25    0.40
   0  -5 -11    1.80    0.61
   0  -5 -11    1.44    0.30
   0   5 -11    1.74    0.42
   0   5 -11    1.43    0.47
   0  -5 -11    1.18    0.47
  13  -2  -7  145.17    1.72
 -13   2   7  138.45    1.76
  13  -2  -7  143.40    1.77
  13   2  -7  137.67    1.51
   6   6   5   27.13    1.11
   6  -6   5   26.08    0.78
  -6  -6  -5   24.46    0.84
   6  -6   5   25.75    0.64
   6   6   5   25.20    0.72
   4   5 -12   63.39    1.02
   4  -5 -12   74.32    1.31
   4  -5 -12   70.70    1.06
  -4   5  12   70.94    1.05
   4  -5 -12   82.42    1.71
   4   5 -12   82.87    1.25
   4   5 -12   71.56    1.21
   5   8  -1   51.77    0.97
  -5   8   1   53.47    0.99
  -5   8   1   54.23    1.08
  11  -3 -11  124.54    1.87
  11   3 -11  119.73    1.85
  11   3 -11  118.23    1.75
  -4   8   5   98.76    1.34
   4   8  -5   98.67    1.26
  -4   8   5   97.16    1.29
   4   8  -5  101.41    1.14
   4  -8  -5  100.17    1.33
  -8  -6  -2   45.18    1.07
   8   6   2   51.63    1.01
   8  -6   2   49.48    1.03
  -8   6  -2   46.42    1.10
  -8   6   9  102.97    1.50
   8  -6  -9  105.76    1.53
   8  -6  -9  101.11    1.45
   5   5 -12  233.09    2.00
   5  -5 -12  199.58    1.82
  -5   5  12  222.93    2.03
   5  -5 -12  235.25    2.80
   5  -5 -12  210.60    2.13
 -12   2   0    9.11    0.70
  12   2   0    9.30    0.57
   5  -7   4    6.78    0.46
   5   7   4    6.48    0.67
   5  -7   4    7.11    0.39
  -5  -7  -4    5.28    0.46
   5   7   4    6.40    0.46
  -5  -7  -4    6.00    0.48
  -5   7  -4    6.13    0.46
   3  -3  11   39.18    0.70
  -3  -3 -11   38.68    1.12
  11   5  -5   55.30    1.26
 -11   5   5   55.02    1.25
   6   4 -13    4.33    0.49
   6  -4 -13    3.98    0.52
  -6   4  13    4.49    0.49
   6   4 -13    4.15    0.47
  -9   1  -6   54.90    1.28
   9  -1   6   56.03    1.37
   9  -1   6   55.11    0.99
   0   4 -12   11.74    0.72
   0   4 -12   12.76    0.59
   0   4 -12   12.41    0.68
  13  -2  -4    5.95    0.47
  13   2  -4    7.03    0.50
 -13   2   4    5.67    0.56
   9   0 -14  137.65    1.66
  -9   0  14  131.56    1.52
  10  -5  -9   20.24    0.72
  10   5  -9   18.50    0.66
  10  -5  -9   17.96    0.69
 -10   5   9   18.55    0.67
  11   0   3    0.25    0.48
  11   0   3   -0.09    0.30
   0  -7  -8   74.36    1.28
   0   7   8   71.81    1.39
   0  -7  -8   70.67    1.02
  -2  -5 -10   94.78    1.68
  -2  -5 -10   97.03    1.25
  -2   5 -10   90.57    1.20
  -2   5 -10   95.04    1.28
   2  -5  10  105.92    1.18
  -2  -5 -10  108.76    1.79
   2   5  10   98.12    1.69
   3   8   3  131.90    1.31
  -3   8  -3  141.66    1.29
  -3   8  -3  127.91    1.52
   3   8   3  135.31    1.80
  -3   8  -3  139.73    1.40
   3   6   8    0.89    0.61
  -3  -6  -8    0.88    0.42
  -3  -6  -8    1.67    0.48
  -3   6  -8    1.29    0.35
   3  -6   8    1.04    0.36
  -3   6  -8    1.43    0.37
  -3  -6  -8    1.11    0.40
   2   8   4  323.63    2.87
  -2   8  -4  340.46    2.21
 -11   5   4  279.68    2.74
  11   5  -4  274.13    2.62
  11  -2 -12   16.20    0.67
  11  -2 -12   16.25    0.76
  11   2 -12   15.58    0.76
   9  -3   5    6.94    0.42
  -9   3  -5    6.94    0.75
   9  -3   5    6.73    0.63
   9   3   5    5.99    0.76
   9   3   5    6.70    0.52
  -5   2 -10  102.32    1.67
   5   2  10   99.13    1.83
   5  -2  10   98.45    1.17
   9   4   4   86.14    1.71
   9  -4   4   92.02    1.51
   9  -4   4   80.63    0.98
  -9  -4  -4   77.68    1.29
   9   4   4   90.52    1.30
  10   4 -11   12.18    0.64
  10   4 -11   11.75    0.66
  10  -4 -11   13.77    0.77
  10  -4 -11   13.11    0.62
 -10   4  11   12.41    0.58
  13   1  -9  222.56    2.32
  13  -1  -9  224.03    2.30
   8   7  -3   91.37    1.14
  -8   7   3   89.47    1.13
   8   7  -4   18.87    0.55
  -8   7   4   20.06    0.69
  -8   7   4   18.37    0.52
  -2   4 -11   30.41    0.82
   2  -4  11   30.13    0.60
   7  -7  -7   66.52    1.16
  -7   7   7   69.67    1.22
   7  -7  -7   68.82    1.11
   5   8  -4   31.65    0.75
  -5   8   4   31.32    0.74
   5  -8  -4   30.37    0.68
  13   0  -2   68.79    1.19
 -11   4   0   37.57    1.18
  11  -4   0   32.81    0.82
  11   4   0   34.08    0.71
 -11  -4   0   36.19    0.93
  -1  -1 -13  305.62    2.37
   3  -5 -12   58.93    1.19
   3  -5 -12   67.12    1.53
  12   4  -5   62.70    1.26
 -12   4   5   61.05    1.31
  11   5  -6   61.42    1.28
 -11   5   6   60.14    1.29
  12   0   1   -0.13    0.33
   6  -7  -8  124.65    1.52
   6  -7  -8  123.75    1.61
   8  -2   7    5.84    0.61
   8   2   7    6.35    0.75
  -8   2  -7    7.38    0.67
   8   2   7    6.15    0.48
  -8   2  14  425.67    2.91
   8  -2 -14  428.11    3.37
   8  -2 -14  420.28    3.20
   8   2 -14  429.22    3.20
   3  -4 -13   25.75    0.88
   3  -4 -13   27.29    1.07
   3   4 -13   28.71    0.83
 -12   4   6    6.18    0.59
  12   4  -6    6.84    0.59
   9   6   0   91.67    1.23
   9  -6   0   89.38    1.26
   7   7   1  271.12    2.14
  -7   7  -1  274.21    2.15
   6  -5 -12  558.54    4.21
   6   5 -12  556.87    2.95
  10   2 -13    3.01    0.49
  10  -2 -13    2.71    0.35
  10  -2 -13    3.79    0.53
  10   2 -13    3.91    0.52
  10   2 -13    4.19    0.55
 -10   2  13    2.88    0.38
  10  -2 -13    3.45    0.50
   1   0 -14  265.28    2.23
   7  -6 -10    9.85    0.53
   7  -6 -10    8.17    0.56
 -12   3   1    1.48    0.52
 -12  -3   1    0.47    0.30
  -2   7  -7   64.97    1.08
  -2  -7  -7   61.46    1.14
  -2   7  -7   63.78    0.95
   2   7   7   62.36    1.41
   9   1 -14  217.86    2.37
   9   1 -14  219.16    2.18
   9  -1 -14  223.96    2.45
  11   1   3  107.83    1.24
  11   1   3  103.83    1.69
  13  -2  -8  107.37    1.49
  13  -2  -8  109.76    1.52
   5   8   0   39.10    0.82
  -5   8   0   41.13    0.91
   9   4 -12    4.36    0.40
   9   4 -12    4.69    0.49
   9  -4 -12    6.98    0.65
   9  -4 -12    6.30    0.45
  -9   4  12    6.78    0.52
 -12   4   4    3.56    0.59
  12   4  -4    4.20    0.49
   9  -6  -8   81.57    1.22
  -9   6   8   83.55    1.25
  -4   8  -2   61.57    1.09
   4   8   2   60.65    0.94
  -4   8  -2   62.66    0.98
   9  -3 -13  263.36    2.37
   9  -3 -13  309.95    2.95
   9   3 -13  243.33    2.31
  -9   3  13  292.87    2.31
   9   3 -13  298.77    2.59
   9   3 -13  219.98    2.04
  -2   8   6    8.81    0.52
   2   8  -6    7.32    0.45
   2   8  -6    8.81    0.51
   2  -8  -6    8.54    0.50
   2  -8  -6    8.10    0.48
  -8   7   2   40.50    0.80
  -8   7   2   41.04    0.83
   8   7  -2   41.25    0.81
   8   7  -5   39.17    0.66
  -8   7   5   49.56    0.98
 -11   5   3   19.14    0.83
  11   5  -3   17.10    0.74
   2   2 -14   18.02    0.60
   2   2 -14   16.71    0.54
   1   8   5  139.09    1.83
  -1   8  -5  135.36    1.49
  -1  -8  -5  127.23    1.43
  -1   8  -5  147.15    1.44
  -1  -8  -5  123.20    1.42
  -3   0 -12   42.87    0.96
  13   1  -2   20.51    0.70
  13  -1  -2   17.73    0.62
  -3   8   6  116.02    1.43
   3  -8  -6  112.00    1.38
   5  -3 -14    5.32    0.64
   5   3 -14    6.43    0.52
   5   3 -14    7.30    0.56
  -5   3  14    6.28    0.46
   5  -3 -14    8.01    0.63
   7   6   4   27.66    0.73
   7   6   4   26.65    0.95
   7  -6   4   26.76    0.55
   7  -6   4   27.12    0.77
  -6  -7  -3   94.50    1.22
   6   7   3  115.39    1.34
   6   7   3   96.97    1.43
  -6   7  -3  105.71    1.21
   6  -7   3  108.15    1.35
  -6  -7  -3   92.16    1.29
   7  -4 -13   35.88    1.13
   7   4 -13   35.71    0.81
   7   4 -13   32.66    0.84
   7  -4 -13   33.48    0.86
  12  -4  -7  136.35    1.45
  12  -4  -7  128.74    1.37
   3  -7  -9   58.22    1.10
   3  -7  -9   55.96    0.93
   3   7  -9   57.82    0.89
  13  -2  -3  174.71    1.62
 -13   2   3  183.76    2.04
   1  -1 -14   40.43    0.87
   1   1 -14   39.91    0.86
   1  -8  -6   76.54    1.15
  -1   8   6   77.23    1.26
   0  -6 -10   20.59    0.71
   0  -6 -10   22.54    0.68
   0  -6 -10   22.63    0.87
   0  -6  10   21.43    0.53
   0   6 -10   21.03    0.66
  11   5  -7   38.22    0.98
  11  -5  -7   32.94    0.73
   6   3 -14   55.82    1.04
   6   3 -14   59.58    1.17
   6  -3 -14   54.51    1.28
   6  -3 -14   61.26    1.27
  -6   3  14   56.65    1.04
   4   7  -9   54.85    0.80
   4  -7  -9   57.43    1.10
  11   4 -10   55.79    1.23
  11  -4 -10   57.05    1.08
  11  -4 -10   58.22    1.14
  12   2 -11   82.61    1.50
  12   2 -11   85.05    1.42
   6   4   8   26.66    0.61
  -6  -4  -8   28.71    0.92
  -6   4  -8   30.46    0.96
   6  -4   8   28.78    0.67
   6   4   8   28.34    1.14
   4  -3 -14   21.73    0.84
   4  -3 -14   19.88    0.86
   4   3 -14   21.24    0.75
   4   3 -14   20.80    0.70
  10   6  -4    0.43    0.45
 -10   6   4    0.17    0.34
   4  -2  11   77.44    0.91
   2   5 -12    9.63    0.55
   2   5 -12    8.91    0.54
   2  -5 -12   11.35    0.75
   2  -5 -12   10.06    0.58
   2   5 -12    9.54    0.56
   5  -8  -5    5.99    0.39
   5   8  -5    5.88    0.39
  -5   8   5    5.97    0.37
  -5   8   5    7.09    0.48
 -10   6   5   14.67    0.62
  10   0   5    0.19    0.49
  10   0   5    0.04    0.32
  -3   1 -12  844.67    4.39
  -3  -1 -12  820.29    3.92
  13   0 -10    8.43    0.57
  13   0 -10    7.13    0.47
  -2   6  -9  412.89    2.53
   2  -6   9  469.35    2.49
  -2  -6  -9  449.33    2.82
  -2  -6  -9  403.17    3.00
  -2   6  -9  424.11    2.39
  -2  -6  -9  433.38    3.26
   2   6   9  443.43    3.40
  11   0 -13   -0.01    0.33
  11   0 -13    0.40    0.44
 -12   4   3   27.54    0.93
  12   4  -3   25.00    0.73
   2  -7  -9   79.40    1.01
   2   7  -9   72.57    1.05
   2  -7  -9   86.93    1.29
   2   7  -9   90.83    1.12
   4  -6 -11  121.45    1.44
   4   6 -11   85.82    1.13
   4   6 -11   97.71    1.06
   4  -6 -11  122.64    1.80
  -5   4  -9    3.14    0.46
   5   4   9    3.54    0.65
   5  -4   9    3.80    0.36
  -5  -4  -9    2.64    0.41
   5   0 -15    0.05    0.34
   5   0 -15    0.03    0.31
  -6   0  15    0.16    0.37
   6   0 -15    0.15    0.35
   6   0 -15    0.08    0.38
  -7  -4  -7  116.97    1.70
   7   4   7  102.21    1.23
  -7  -4  -7   94.54    1.27
   7   4   7   97.60    1.89
   7  -4   7  106.84    1.48
  -7   4  -7  110.37    1.71
  12  -3 -10  154.46    1.73
  12   3 -10  151.01    2.00
  12  -3 -10  149.08    1.77
  -6  -5  -7   99.65    1.42
   6   5   7   99.97    1.12
   6   5   7  103.88    1.91
   6  -5   7  100.63    1.31
  -6  -5  -7  104.03    1.56
  -4   8   6   24.01    0.61
   4  -8  -6   23.28    0.64
   4   8  -6   26.62    0.63
  -4   8   6   22.36    0.59
   4  -8  -6   26.36    0.69
   4   8  -6   25.25    0.57
  -5  -5  -8   21.45    0.83
   5  -5   8   22.57    0.59
   5   5   8   20.30    0.98
   8   7  -1    0.29    0.30
  -8   7   1    0.51    0.28
  -8  -7   1    0.45    0.26
  -8   7   6  120.25    1.43
   8  -7  -6  110.34    1.22
   2   4 -13  257.91    2.13
   2  -4 -13  260.53    2.44
   7  -5 -12   22.74    0.88
  -7   5  12   22.36    0.70
   9  -2   6    0.49    0.30
  -9   2  -6    0.82    0.47
   9  -2   6    0.70    0.46
   9   2   6    0.77    0.57
   9   2   6    0.49    0.34
 -10   6   3  189.05    1.98
  11  -3   2   22.39    0.75
  11   3   2   21.61    0.59
  -5   6  11   52.21    0.90
   5  -6 -11   57.45    1.01
   3   6 -11   85.36    1.07
   3   6 -11   78.30    1.09
   3  -6 -11   98.99    1.26
   3  -6 -11   97.24    1.60
 -10   5  -1   17.15    0.81
  10  -5   1   15.99    0.60
  10   5   1   18.13    0.56
 -10  -5  -1   15.77    0.65
  -9  -5  -3   15.38    0.64
   9  -5   3   17.50    0.69
  -9   5  -3   16.97    0.79
 -11   5   2   42.11    1.09
   5  -7  -9   40.63    0.91
   5  -7  -9   39.24    0.81
  12   0 -12    1.55    0.35
  12   0 -12    0.97    0.41
   5   8   1   25.92    0.64
  -5   8  -1   27.01    0.72
  -5   8  -1   26.41    0.65
   0   3 -13   29.38    0.73
   0  -3 -13   37.45    0.89
   0  -3 -13   39.18    0.97
   0   3 -13   27.69    0.76
  10   6  -6  146.80    1.78
 -10   6   6  136.58    1.62
   7  -3 -14   51.90    1.11
   7  -3 -14   49.96    1.16
   7   3 -14   53.92    1.06
  13  -2  -9   74.71    1.20
  13  -2  -9   77.59    1.24
  13   2  -9   53.56    1.16
  13   2  -9   77.71    1.34
 -13   2   9   56.34    0.99
  10  -1   5   -0.23    0.47
  10   1   5    0.01    0.31
  10  -1   5    0.21    0.29
  10   1   5   -0.23    0.49
  -1   7  -8   23.60    0.67
   1   7   8   26.53    0.83
  -1   2 -13  366.69    2.56
  13  -1 -10   55.75    1.10
  13  -1 -10   59.94    1.07
  11   1 -13  183.27    2.08
  11   1 -13  170.66    1.82
   0   8   6  103.89    1.44
   0  -8  -6  104.15    1.22
   0  -8  -6  102.99    1.26
   0   8  -6  102.30    1.19
  12   4  -8  187.93    1.99
  12  -4  -8  181.95    1.70
  -2  -3 -12   16.14    0.69
  -2   3 -12   16.96    0.56
   4   0 -15   -0.04    0.34
  -4   0  15    0.12    0.31
   5   1 -15   17.07    0.52
   5  -1 -15   16.11    0.69
  -5   1  15   16.47    0.59
   5   1 -15   17.70    0.70
   6   1 -15   90.96    1.35
  -6  -1  15   86.80    1.26
   6  -1 -15   89.72    1.44
  -6   8   3   14.18    0.49
  -6   8   3   15.48    0.58
   6   8  -3   15.07    0.50
  -7   0  15    0.18    0.37
   7   0 -15   -0.02    0.32
   7   0 -15   -0.01    0.39
   3  -3 -14    5.31    0.53
   3   3 -14    5.38    0.45
   3   3 -14    5.89    0.45
  -6   8   2   91.03    1.22
  -6   8   2   89.14    1.10
  -7  -5  -6    0.44    0.39
   7  -5   6    0.51    0.27
  -7  -5  -6    0.99    0.35
   7   5   6    0.58    0.30
   7  -5   6    0.74    0.34
   7   5   6    1.08    0.53
  -7   5  -6    0.56    0.36
   9  -5 -11   51.36    0.94
   9  -5 -11   49.64    1.07
 -13   3   6    0.50    0.37
  13   3  -6    0.61    0.37
  13  -3  -6    0.43    0.26
  13   0  -1    0.19    0.29
  -4  -5  -9   23.79    0.83
   4  -5   9   24.29    0.57
   4   5   9   24.18    0.93
  -1  -5 -11   19.35    0.72
  -1   5 -11   18.95    0.55
  -1   5 -11   18.44    0.62
  -9   2  14    1.20    0.35
   9   2 -14    0.87    0.42
   9  -2 -14    1.00    0.36
   9  -2 -14    1.12    0.43
   9   2 -14    1.14    0.38
   9   2 -14    0.55    0.36
 -13   3   5    7.35    0.54
  11   2   3   90.99    1.09
  11  -2   3   98.13    1.43
  -3   8  -4   37.72    0.79
   3   8   4   36.51    0.88
 -10   3  -4    2.06    0.49
  10   3   4    1.68    0.34
  10  -3   4    1.78    0.44
   7  -7  -8    0.94    0.35
   7  -7  -8    0.89    0.30
  11   5  -8    7.78    0.59
  11  -5  -8   14.31    0.53
   4   4  10  190.07    2.20
   4  -4  10  207.39    1.49
  12   1 -12   42.42    0.93
  12  -1 -12   40.68    0.87
  12   1 -12   41.51    1.02
  12  -1 -12   41.18    0.83
 -10   5  10   10.74    0.49
  10  -5 -10   10.71    0.50
  -6  -3  -9   13.39    0.64
  -6   3  -9   12.27    0.66
   1   7  -9  119.48    1.22
   1   7  -9  106.05    1.23
   9   6   1   32.84    0.71
  -9  -6  -1   31.30    0.79
   9  -6   1   32.57    0.76
  10   0 -14    5.76    0.49
  10   0 -14   10.33    0.65
   8   4   6  315.49    3.06
   8   4   6  320.76    2.15
   8  -4   6  313.75    2.51
  -8   4  -6  322.54    2.78
   7   3   8   10.35    0.79
   7  -3   8    8.97    0.42
   7   3   8    8.84    0.41
  -7  -3  -8    8.29    0.56
   7  -3   8    8.77    0.53
   6   8  -4   20.39    0.53
  -6   8   4   20.20    0.52
  -8   4  13    1.82    0.36
   8  -4 -13    2.40    0.50
  13   2  -2    0.84    0.31
 -10  -6   2    6.40    0.45
  -6   6  11    7.86    0.45
   6  -6 -11    8.34    0.46
   6  -6 -11    7.88    0.38
   6  -6 -11    7.13    0.52
 -12   2  -1  142.53    1.74
 -13   3   7    4.49    0.45
  13  -3  -7    5.16    0.37
   2  -6 -11   25.70    0.63
   2  -6 -11   27.32    0.88
  -2  -8  -5  233.37    1.75
  -2  -8  -5  240.40    1.79
   7   7   2   88.38    1.09
   7  -7   2   86.35    1.13
  10  -4   3    7.13    0.49
  10   4   3    6.53    0.41
   4  -1 -15    0.60    0.34
  -4  -1  15    0.71    0.33
   4   1 -15    0.61    0.38
  -4   8  -3   18.62    0.59
  -4  -8  -3   13.30    0.46
   8  -6   3  158.83    1.62
   8   6   3  163.55    1.51
  -8   6  10  404.76    2.65
  -7   1  15   33.20    0.77
   7   1 -15   33.59    0.84
  -7  -1  15   31.68    0.77
  -6   8   1   29.52    0.65
   6   8  -1   28.38    0.65
 -12   3   0   25.04    0.86
  -1  -4 -12    1.00    0.43
  -1   4 -12    0.56    0.35
  -1  -4 -12    0.50    0.34
 -12   4   2    1.00    0.45
 -12  -4   2    1.16    0.33
 -11  -4  -1   81.27    1.11
 -11   4  -1   91.69    1.54
   1   2 -14  142.49    1.68
  -9   6   9    3.55    0.38
   9  -6  -9    3.03    0.36
  13   1  -1  226.61    1.91
   7   0   9    0.06    0.26
   7   0   9   -0.01    0.41
 -13   3   4    0.19    0.37
  10   6  -7    5.15    0.45
   5  -8  -6  176.30    1.53
   5   8  -6  150.81    1.26
  -4   7  -6    0.20    0.25
  -4  -7  -6    0.41    0.31
   4  -7   6    0.94    0.27
   1  -5 -12    0.20    0.35
   1  -5 -12    0.03    0.46
   1   5 -12    0.34    0.32
  11  -3 -12    3.19    0.45
  11   3 -12    3.86    0.44
  11  -3 -12    3.82    0.36
   5  -3  10   62.49    0.82
  -5   3 -10   60.86    1.09
   5   3  10   58.30    1.25
  -5  -3 -10   57.11    1.08
   8  -7   0   28.95    0.67
   8  -7  -7    0.15    0.24
  -8   7   7   -0.13    0.33
   5  -7   5  230.65    1.49
  -5  -7  -5  214.50    1.75
  10   1 -14  183.46    1.74
  10  -1 -14  148.15    1.78
   6  -7  -9   90.55    1.22
   0   0 -14   83.26    1.10
  -3   2 -12   25.86    0.71
   3   0 -15    0.17    0.30
   8  -3   7  183.80    1.91
   8   3   7  182.31    1.54
  -8   3  14  292.62    2.10
   8  -3 -14  299.75    2.45
   8   3 -14  297.27    2.23
   0   9   0    0.01    0.32
   8   0   8    1.58    0.32
   8   0   8    1.95    0.49
  -8   0  15    0.08    0.30
   3  -8  -7  421.24    2.52
   3   8  -7  406.71    2.27
   2  -8  -7   72.63    1.02
   2   8  -7   80.78    0.95
   2  -8  -7   84.08    1.08
  -2   8   7   73.69    0.99
  -5  -6  -7   14.65    0.51
  -5  -6  -7   13.88    0.56
   5   6   7   15.67    0.76
  10  -3 -13  357.23    2.70
  10   3 -13  351.55    2.51
  -3   7  -7    0.03    0.26
   3  -7   7    0.02    0.27
  -3  -7  -7    0.18    0.29
 -11   5   1   13.51    0.66
   7  -1   9    0.05    0.28
   7   1   9   -0.13    0.45
  -7   1  -9    0.15    0.30
   7   1   9    0.21    0.24
  -1   6 -10   77.92    0.98
  -1   6 -10   76.31    0.98
  -8  -5  -5  102.80    1.34
   8  -5   5  114.79    1.41
  -8  -5  -5  101.76    1.27
   8   5   5  116.49    1.22
  -8   5  12  135.52    1.41
   8  -5 -12  132.78    1.65
 -13   3   8  176.42    1.72
  13  -3  -8  178.32    1.55
   1  -4 -13    6.63    0.55
   1   4 -13    4.77    0.41
   0   9   1   80.32    0.98
   0   9  -1  130.76    1.18
  -3  -5 -10   65.68    1.22
  10  -4 -12   43.95    1.00
  -1  -8  -6   22.27    0.57
   1   8   6   24.39    0.71
  -1   8  -6   24.78    0.58
  -1  -8  -6   22.62    0.53
  -1   8  -6   23.45    0.58
   1   9   0   51.79    0.83
   1   9  -1  127.66    1.21
  -1   9   1  111.82    1.08
  12   4  -9  154.59    1.58
  12  -4  -9  150.34    1.48
  -6   1 -10   11.32    0.54
   6   6   6  115.25    1.65
  -6  -6  -6  106.48    1.30
   2   3 -14   34.09    0.72
   2  -3 -14   49.25    0.96
  -5   8  -2  104.28    1.08
  -5   8  -2  104.76    1.15
  10   2   5   95.17    1.10
 -10   2  -5  118.87    1.53
   0   1 -14   18.58    0.55
  13   0 -11    0.18    0.32
  -6   8   0    2.34    0.32
  -6   8   0    2.22    0.36
   6   8   0    2.22    0.33
   4   6   8   14.29    0.75
  -4  -6  -8   14.72    0.50
  13   2 -10    0.57    0.40
  13   2 -10    1.37    0.38
  13  -2 -10    1.15    0.39
  13  -2 -10    1.43    0.37
  11   2 -13    1.52    0.40
  11   2 -13    0.40    0.32
  11   2 -13    1.43    0.39
  14   0  -5    0.03    0.33
   3   1 -15    4.63    0.50
  -2   1 -13   13.30    0.56
   5   2 -15  554.54    3.22
   5  -2 -15  583.78    3.41
  11  -4 -11    3.04    0.42
   4  -8  -7  123.61    1.27
   6   2 -15    8.09    0.46
  -6   2  15    8.26    0.43
   8   1   8  178.67    2.14
   8  -1   8  177.04    1.42
  -6  -7  -4    0.77    0.28
  -8   1  15   -0.05    0.34
   8  -1 -15    0.08    0.44
   8   1 -15    0.19    0.37
   8   1 -15    0.11    0.33
   1  -8  -7  495.98    2.56
   1  -8  -7  456.35    2.59
   1   8  -7  517.53    2.48
  -1   8   7  453.05    2.64
  -3  -4 -11   72.94    1.24
 -10  -6   1   45.78    0.86
   1   9   1   -0.05    0.37
  -1   9  -1    2.89    0.33
  -7   6  11    3.54    0.38
  14  -1  -6    7.46    0.46
   0   7  -9   19.66    0.61
   0   7  -9   20.29    0.57
   1   6 -11    0.13    0.35
  12  -3 -11  367.01    2.51
  -1   9   2   63.74    0.86
   1   9  -2   56.07    0.81
  11  -5  -9    8.62    0.45
   9   4   5   79.56    1.01
  -9   4  -5   84.37    1.34
  12  -2 -12   15.51    0.55
  12   2 -12    8.85    0.65
   0   9  -2    1.94    0.36
   0   9   2   -0.43    0.38
  14  -1  -7  256.66    1.92
   2   9  -1   27.44    0.59
  14   1  -5   21.18    0.60
   9   0   7    0.13    0.35
   9   0   7   -0.37    0.57
  -5   1 -11    1.09    0.39
   7   2 -15    1.68    0.45
   7  -2 -15    1.52    0.49
   2  -7   8  262.06    1.62
  -7  -6  -5   45.32    0.88
 -12   4   1    3.53    0.65
  14   0  -4   48.97    0.85
   9   3   6   47.44    0.79
   9  -3   6   46.99    1.03
  -9   3  -6   49.74    1.10
   5  -5 -13   23.36    0.90
   0   0   0    0.00    0.00

_computing_structure_solution     'SHELXT 2018/2 (Sheldrick, 2018)'
;

_shelx_hkl_checksum   10066

#==============================================================================
#     End of CIF
#==============================================================================
