# Supplementary material for: Solid State Structure and Hydrogen Bonding of Some Cyclic NH Carboximides
Source: MDPI journal article supplement (doi:10.3390/cryst13010150), 2023-01-15
Supplement: s1 [file s1 › 6.cif]

data_6
_audit_creation_date                               2020-08-25
_audit_creation_method                            'by CrystalStructure 4.3'

_publ_section_references
;
    ENTER OTHER REFERENCES

    Rigaku (2018). CrystalStructure. Version 4.3. 
    Rigaku Corporation, Tokyo, Japan.

    Sheldrick, G. M. (2014). Acta Cryst. (2014). A70, C1437.
    SHELXT Version 2018/2

    Sheldrick, G.M. (2008) SHELXL Version 2018/3, Acta Cryst. A64, 112-122.

    Rigaku (1998). REQAB. 
    Rigaku Corporation, Tokyo, Japan.

;


_chemical_formula_sum                             'C12 H13 N O2'
_chemical_formula_moiety                          'C12 H13 N O2'
_chemical_formula_weight                           203.24
_chemical_melting_point                            ?

#==============================================================================
# CRYSTAL DATA
_space_group_crystal_system                        monoclinic
_space_group_name_H-M_alt                         'P 1 21/c 1'
_space_group_name_Hall                            '-P 2ybc'
_space_group_IT_number                             14
loop_
_space_group_symop_id
_space_group_symop_operation_xyz
1   '+X,+Y,+Z'
2   '-X,1/2+Y,1/2-Z'
3   '-X,-Y,-Z'
4   '+X,-1/2-Y,-1/2+Z'
#------------------------------------------------------------------------------
_cell_length_a                                     10.978(3)
_cell_length_b                                     11.441(3)
_cell_length_c                                     8.122(2)
_cell_angle_alpha                                  90.0000
_cell_angle_beta                                   92.417(7)
_cell_angle_gamma                                  90.0000
_cell_volume                                       1019.2(5)
_cell_formula_units_Z                              4
_cell_measurement_reflns_used                      2991
_cell_measurement_theta_min                        1.90
_cell_measurement_theta_max                        27.50
_cell_measurement_temperature                      173
#------------------------------------------------------------------------------
_exptl_crystal_description                         prism
_exptl_crystal_colour                              colorless
_exptl_crystal_size_max                            0.120
_exptl_crystal_size_mid                            0.100
_exptl_crystal_size_min                            0.030
_exptl_crystal_density_diffrn                      1.324
_exptl_crystal_density_meas                        ?
_exptl_crystal_density_method                     'not measured'
_exptl_crystal_F_000                               432.00
_exptl_absorpt_coefficient_mu                      0.090
_exptl_absorpt_correction_type                     multi-scan
_exptl_absorpt_process_details                    'REQAB (Rigaku, 1998)'
_exptl_absorpt_correction_T_min                    0.572
_exptl_absorpt_correction_T_max                    0.997

#==============================================================================
# EXPERIMENTAL DATA

_diffrn_ambient_temperature                        173
_diffrn_radiation_type                            'Mo K\a'
_diffrn_radiation_wavelength                       0.71075
_diffrn_measurement_device_type                   'Rigaku XtaLAB P200'
_diffrn_measurement_method                         \w
_diffrn_detector_area_resol_mean                   5.814
_diffrn_reflns_number                              11923
_diffrn_reflns_av_unetI/netI                       0.0149
_diffrn_reflns_av_R_equivalents                    0.0286
_diffrn_reflns_theta_max                           25.361
_diffrn_reflns_theta_min                           1.857
_diffrn_reflns_theta_full                          25.242
_diffrn_measured_fraction_theta_max                0.996
_diffrn_measured_fraction_theta_full               0.996
_diffrn_reflns_Laue_measured_fraction_max          0.996
_diffrn_reflns_Laue_measured_fraction_full         0.996
_diffrn_reflns_point_group_measured_fraction_max   0.996
_diffrn_reflns_point_group_measured_fraction_full  0.996
_diffrn_reflns_limit_h_min                        -13
_diffrn_reflns_limit_h_max                         13
_diffrn_reflns_limit_k_min                        -13
_diffrn_reflns_limit_k_max                         13
_diffrn_reflns_limit_l_min                        -9
_diffrn_reflns_limit_l_max                         9
_diffrn_standards_number                           0
_diffrn_standards_interval_count                   .
_diffrn_standards_decay_%                          ?
_reflns_number_total                               1856
_reflns_number_gt                                  1743
_reflns_threshold_expression                       F^2^>2.0\s(F^2^)
_reflns_Friedel_coverage          0.000
_reflns_Friedel_fraction_max      .
_reflns_Friedel_fraction_full     .

#==============================================================================
# REFINEMENT DATA

_refine_special_details
;
    Refinement was performed using all reflections. The weighted 
    R-factor (wR) and goodness of fit (S) are based on F^2^.
    R-factor (gt) are based on F. The threshold expression of
    F^2^ > 2.0 sigma(F^2^) is used only for calculating R-factor (gt).
;
_refine_ls_structure_factor_coef                   Fsqd
_refine_ls_R_factor_all                            0.0385
_refine_ls_R_factor_gt                             0.0370
_refine_ls_wR_factor_ref                           0.0981
_refine_ls_wR_factor_gt                            0.0969
_refine_ls_number_restraints                       0
_refine_ls_hydrogen_treatment                      mixed
_refine_ls_number_reflns                           1856
_refine_ls_number_parameters                       142
_refine_ls_goodness_of_fit_ref                     1.090
_refine_ls_weighting_scheme                        calc
_refine_ls_weighting_details
           'w = 1/[\s^2^(Fo^2^)+(0.0505P)^2^+0.3577P] where P=(Fo^2^+2Fc^2^)/3'
_atom_sites_solution_hydrogens                     geom
_atom_sites_solution_primary                       direct
_atom_sites_solution_secondary                     difmap
_refine_ls_shift/su_max                            0.000
_refine_diff_density_max                           0.21
_refine_diff_density_min                          -0.20
_refine_ls_extinction_method                       none
_refine_ls_extinction_coef                         ?

loop_
_atom_type_symbol
_atom_type_description
_atom_type_scat_dispersion_real
_atom_type_scat_dispersion_imag
_atom_type_scat_source
  'C' 'C'  0.0033 0.0016 
;
International Tables for Crystallography
(Vol. C, Tables 4.2.6.8 and 6.1.1.4)
;
  'H' 'H'  0.0000 0.0000 
;
International Tables for Crystallography
(Vol. C, Table 6.1.1.4)
;
  'N' 'N'  0.0061 0.0033 
;
International Tables for Crystallography
(Vol. C, Tables 4.2.6.8 and 6.1.1.4)
;
  'O' 'O'  0.0106 0.0060 
;
International Tables for Crystallography
(Vol. C, Tables 4.2.6.8 and 6.1.1.4)
;

#==============================================================================
# ATOMIC COORDINATES AND THERMAL PARAMETERS

loop_
 _atom_site_label
 _atom_site_type_symbol
 _atom_site_fract_x
 _atom_site_fract_y
 _atom_site_fract_z
 _atom_site_U_iso_or_equiv
 _atom_site_adp_type
 _atom_site_occupancy
 _atom_site_site_symmetry_order  
 _atom_site_calc_flag
 _atom_site_refinement_flags_posn
 _atom_site_refinement_flags_adp
 _atom_site_refinement_flags_occupancy
 _atom_site_disorder_assembly
 _atom_site_disorder_group
O2 O 0.93009(9) 0.72424(8) 0.20805(11) 0.0314(3) Uani 1 1 d . . . . .
O9 O 0.81067(10) 0.48458(8) 0.61704(11) 0.0328(3) Uani 1 1 d . . . . .
N1 N 0.87590(9) 0.62275(9) 0.43603(13) 0.0222(3) Uani 1 1 d . . . . .
C2 C 0.90538(11) 0.63247(11) 0.27417(14) 0.0214(3) Uani 1 1 d . . . . .
C3 C 0.89993(11) 0.51222(10) 0.19658(14) 0.0201(3) Uani 1 1 d . . . . .
H3 H 0.981526 0.485436 0.161327 0.024 Uiso 1 1 calc R U . . .
C4 C 0.80010(11) 0.50496(10) 0.05317(14) 0.0215(3) Uani 1 1 d . . . . .
H4 H 0.803210 0.565950 -0.034747 0.026 Uiso 1 1 calc R U . . .
C5 C 0.80109(11) 0.37816(11) -0.00314(15) 0.0249(3) Uani 1 1 d . . . . .
H5 H 0.830101 0.350297 -0.104472 0.030 Uiso 1 1 calc R U . . .
C6 C 0.75430(11) 0.31322(11) 0.11412(14) 0.0240(3) Uani 1 1 d . . . . .
H6 H 0.743504 0.230853 0.111307 0.029 Uiso 1 1 calc R U . . .
C7 C 0.72113(11) 0.39423(10) 0.25359(14) 0.0202(3) Uani 1 1 d . . . . .
H7 H 0.659849 0.364603 0.331144 0.024 Uiso 1 1 calc R U . . .
C8 C 0.84900(10) 0.43272(10) 0.33176(13) 0.0190(3) Uani 1 1 d . . . . .
H8 H 0.903147 0.363934 0.355418 0.023 Uiso 1 1 calc R U . . .
C9 C 0.84080(11) 0.51122(10) 0.48053(14) 0.0206(3) Uani 1 1 d . . . . .
C10 C 0.68714(11) 0.50377(10) 0.15563(14) 0.0197(3) Uani 1 1 d . . . . .
C11 C 0.59261(11) 0.57581(11) 0.16013(15) 0.0241(3) Uani 1 1 d . . . . .
C12 C 0.58051(13) 0.68212(12) 0.05191(18) 0.0353(3) Uani 1 1 d . . . . .
H12A H 0.648313 0.684483 -0.022731 0.042 Uiso 1 1 calc R U . . .
H12B H 0.582152 0.752554 0.120625 0.042 Uiso 1 1 calc R U . . .
H12C H 0.503166 0.678616 -0.012712 0.042 Uiso 1 1 calc R U . . .
C13 C 0.48838(12) 0.55623(13) 0.27147(17) 0.0329(3) Uani 1 1 d . . . . .
H13A H 0.504061 0.485963 0.338040 0.039 Uiso 1 1 calc R U . . .
H13B H 0.412692 0.546068 0.204650 0.039 Uiso 1 1 calc R U . . .
H13C H 0.480510 0.623902 0.344217 0.039 Uiso 1 1 calc R U . . .
H1 H 0.8797(15) 0.6812(15) 0.507(2) 0.038(4) Uiso 1 1 d . . . . .

loop_
 _atom_site_aniso_label
 _atom_site_aniso_U_11
 _atom_site_aniso_U_22
 _atom_site_aniso_U_33
 _atom_site_aniso_U_23
 _atom_site_aniso_U_13
 _atom_site_aniso_U_12
O2 0.0404(6) 0.0252(5) 0.0281(5) 0.0078(4) -0.0029(4) -0.0097(4)
O9 0.0492(6) 0.0315(5) 0.0179(5) 0.0016(4) 0.0040(4) -0.0070(4)
N1 0.0285(6) 0.0190(5) 0.0189(5) -0.0018(4) -0.0006(4) -0.0017(4)
C2 0.0195(6) 0.0237(6) 0.0207(6) 0.0029(5) -0.0029(4) -0.0027(5)
C3 0.0193(6) 0.0227(6) 0.0184(6) 0.0002(5) 0.0009(5) 0.0003(4)
C4 0.0242(6) 0.0239(6) 0.0162(6) 0.0014(5) -0.0012(5) -0.0006(5)
C5 0.0263(6) 0.0283(7) 0.0198(6) -0.0066(5) -0.0019(5) 0.0014(5)
C6 0.0263(6) 0.0202(6) 0.0250(6) -0.0042(5) -0.0056(5) 0.0005(5)
C7 0.0215(6) 0.0195(6) 0.0194(6) 0.0015(5) -0.0012(4) -0.0016(5)
C8 0.0209(6) 0.0177(6) 0.0181(6) 0.0012(4) -0.0019(4) 0.0016(4)
C9 0.0219(6) 0.0208(6) 0.0188(6) 0.0019(4) -0.0029(5) 0.0000(5)
C10 0.0216(6) 0.0210(6) 0.0163(6) -0.0008(4) -0.0032(5) -0.0027(5)
C11 0.0246(6) 0.0226(6) 0.0245(6) -0.0038(5) -0.0056(5) 0.0005(5)
C12 0.0356(8) 0.0278(7) 0.0417(8) 0.0044(6) -0.0084(6) 0.0066(6)
C13 0.0264(7) 0.0388(8) 0.0334(7) -0.0069(6) 0.0006(5) 0.0059(6)

#==============================================================================
_computing_data_collection
                                'CrystalClear-SM Expert 2.1 b45 (Rigaku, 2015)'
_computing_cell_refinement
                                               'CrystalClear-SM Expert 2.1 b45'
_computing_data_reduction
                                               'CrystalClear-SM Expert 2.1 b45'
_computing_structure_solution
                                      'SHELXT Version 2018/2 (Sheldrick, 2014)'
_computing_structure_refinement
                                      'SHELXL Version 2018/3 (Sheldrick, 2008)'
_computing_publication_material
                                          'CrystalStructure 4.3 (Rigaku, 2018)'
_computing_molecular_graphics                     'CrystalStructure 4.3'

#==============================================================================
# MOLECULAR GEOMETRY

_geom_special_details
;
 All esds (except the esd in the dihedral angle between two l.s. planes)
 are estimated using the full covariance matrix.  The cell esds are taken
 into account individually in the estimation of esds in distances, angles
 and torsion angles; correlations between esds in cell parameters are only
 used when they are defined by crystal symmetry.  An approximate (isotropic)
 treatment of cell esds is used for estimating esds involving l.s. planes.
;

loop_
 _geom_bond_atom_site_label_1
 _geom_bond_atom_site_label_2
 _geom_bond_distance
 _geom_bond_site_symmetry_2
 _geom_bond_publ_flag
O2 C2 1.2152(15) . ?
O9 C9 1.2093(15) . ?
N1 C2 1.3716(16) . ?
N1 C9 1.3853(16) . ?
N1 H1 0.880(17) . ?
C2 C3 1.5133(17) . ?
C3 C8 1.5483(16) . ?
C3 C4 1.5675(16) . ?
C3 H3 1.0000 . ?
C4 C5 1.5213(17) . ?
C4 C10 1.5223(17) . ?
C4 H4 1.0000 . ?
C5 C6 1.3282(18) . ?
C5 H5 0.9500 . ?
C6 C7 1.5197(17) . ?
C6 H6 0.9500 . ?
C7 C10 1.5225(16) . ?
C7 C8 1.5787(16) . ?
C7 H7 1.0000 . ?
C8 C9 1.5112(16) . ?
C8 H8 1.0000 . ?
C10 C11 1.3268(18) . ?
C11 C12 1.5032(18) . ?
C11 C13 1.5049(19) . ?
C12 H12A 0.9800 . ?
C12 H12B 0.9800 . ?
C12 H12C 0.9800 . ?
C13 H13A 0.9800 . ?
C13 H13B 0.9800 . ?
C13 H13C 0.9800 . ?

loop_
 _geom_angle_atom_site_label_1
 _geom_angle_atom_site_label_2
 _geom_angle_atom_site_label_3
 _geom_angle
 _geom_angle_site_symmetry_1
 _geom_angle_site_symmetry_3
 _geom_angle_publ_flag
C2 N1 C9 113.84(10) . . ?
C2 N1 H1 123.7(11) . . ?
C9 N1 H1 122.4(11) . . ?
O2 C2 N1 124.03(11) . . ?
O2 C2 C3 127.38(11) . . ?
N1 C2 C3 108.58(10) . . ?
C2 C3 C8 104.36(9) . . ?
C2 C3 C4 111.82(9) . . ?
C8 C3 C4 103.52(9) . . ?
C2 C3 H3 112.2 . . ?
C8 C3 H3 112.2 . . ?
C4 C3 H3 112.2 . . ?
C5 C4 C10 99.91(9) . . ?
C5 C4 C3 105.09(9) . . ?
C10 C4 C3 98.88(9) . . ?
C5 C4 H4 116.7 . . ?
C10 C4 H4 116.7 . . ?
C3 C4 H4 116.7 . . ?
C6 C5 C4 108.05(11) . . ?
C6 C5 H5 126.0 . . ?
C4 C5 H5 126.0 . . ?
C5 C6 C7 107.79(11) . . ?
C5 C6 H6 126.1 . . ?
C7 C6 H6 126.1 . . ?
C6 C7 C10 100.00(9) . . ?
C6 C7 C8 103.47(9) . . ?
C10 C7 C8 100.06(9) . . ?
C6 C7 H7 116.8 . . ?
C10 C7 H7 116.8 . . ?
C8 C7 H7 116.8 . . ?
C9 C8 C3 104.67(9) . . ?
C9 C8 C7 113.92(10) . . ?
C3 C8 C7 102.72(9) . . ?
C9 C8 H8 111.7 . . ?
C3 C8 H8 111.7 . . ?
C7 C8 H8 111.7 . . ?
O9 C9 N1 124.13(11) . . ?
O9 C9 C8 127.67(11) . . ?
N1 C9 C8 108.19(10) . . ?
C11 C10 C4 131.72(11) . . ?
C11 C10 C7 132.20(11) . . ?
C4 C10 C7 96.07(9) . . ?
C10 C11 C12 122.44(12) . . ?
C10 C11 C13 122.65(12) . . ?
C12 C11 C13 114.90(11) . . ?
C11 C12 H12A 109.5 . . ?
C11 C12 H12B 109.5 . . ?
H12A C12 H12B 109.5 . . ?
C11 C12 H12C 109.5 . . ?
H12A C12 H12C 109.5 . . ?
H12B C12 H12C 109.5 . . ?
C11 C13 H13A 109.5 . . ?
C11 C13 H13B 109.5 . . ?
H13A C13 H13B 109.5 . . ?
C11 C13 H13C 109.5 . . ?
H13A C13 H13C 109.5 . . ?
H13B C13 H13C 109.5 . . ?

loop_
 _geom_torsion_atom_site_label_1
 _geom_torsion_atom_site_label_2
 _geom_torsion_atom_site_label_3
 _geom_torsion_atom_site_label_4
 _geom_torsion
 _geom_torsion_site_symmetry_1
 _geom_torsion_site_symmetry_2
 _geom_torsion_site_symmetry_3
 _geom_torsion_site_symmetry_4
 _geom_torsion_publ_flag
C9 N1 C2 O2 174.64(11) . . . . ?
C9 N1 C2 C3 -4.71(14) . . . . ?
O2 C2 C3 C8 -173.26(12) . . . . ?
N1 C2 C3 C8 6.06(12) . . . . ?
O2 C2 C3 C4 -62.01(16) . . . . ?
N1 C2 C3 C4 117.30(11) . . . . ?
C2 C3 C4 C5 -176.52(9) . . . . ?
C8 C3 C4 C5 -64.75(11) . . . . ?
C2 C3 C4 C10 -73.66(11) . . . . ?
C8 C3 C4 C10 38.11(11) . . . . ?
C10 C4 C5 C6 -31.46(12) . . . . ?
C3 C4 C5 C6 70.63(12) . . . . ?
C4 C5 C6 C7 -0.37(13) . . . . ?
C5 C6 C7 C10 32.08(12) . . . . ?
C5 C6 C7 C8 -70.90(12) . . . . ?
C2 C3 C8 C9 -5.19(11) . . . . ?
C4 C3 C8 C9 -122.33(10) . . . . ?
C2 C3 C8 C7 114.07(10) . . . . ?
C4 C3 C8 C7 -3.07(11) . . . . ?
C6 C7 C8 C9 -177.55(9) . . . . ?
C10 C7 C8 C9 79.52(11) . . . . ?
C6 C7 C8 C3 69.86(11) . . . . ?
C10 C7 C8 C3 -33.08(11) . . . . ?
C2 N1 C9 O9 -179.59(12) . . . . ?
C2 N1 C9 C8 1.15(14) . . . . ?
C3 C8 C9 O9 -176.47(12) . . . . ?
C7 C8 C9 O9 72.11(16) . . . . ?
C3 C8 C9 N1 2.76(12) . . . . ?
C7 C8 C9 N1 -108.66(11) . . . . ?
C5 C4 C10 C11 -133.01(13) . . . . ?
C3 C4 C10 C11 119.84(14) . . . . ?
C5 C4 C10 C7 48.37(10) . . . . ?
C3 C4 C10 C7 -58.78(10) . . . . ?
C6 C7 C10 C11 132.72(13) . . . . ?
C8 C7 C10 C11 -121.53(14) . . . . ?
C6 C7 C10 C4 -48.67(10) . . . . ?
C8 C7 C10 C4 57.08(10) . . . . ?
C4 C10 C11 C12 0.2(2) . . . . ?
C7 C10 C11 C12 178.35(12) . . . . ?
C4 C10 C11 C13 179.05(11) . . . . ?
C7 C10 C11 C13 -2.8(2) . . . . ?

loop_
_geom_hbond_atom_site_label_D
_geom_hbond_atom_site_label_H
_geom_hbond_atom_site_label_A
_geom_hbond_site_symmetry_D
_geom_hbond_site_symmetry_H
_geom_hbond_site_symmetry_A
_geom_hbond_distance_DA
_geom_hbond_distance_DH
_geom_hbond_distance_HA
_geom_hbond_angle_DHA
_geom_hbond_publ_flag
N1 H1 O2 . . 4_576 2.8616(15) 0.880(17) 2.020(17) 159.8(15) no

#==============================================================================
# Additional structures and associated data_? identifiers
# should be added at this point if there is more than one 
# structure analysis in the CIF.

_shelx_res_file
;
TITL DSAA17
    shelxl.res
    created by SHELXL-2018/3 at 18:59:37 on 25-Aug-2020
CELL  0.71075 10.97800 11.44100 8.12200 90.00000 92.41700 90.00000
ZERR  4 0.00300 0.00300 0.00200 0.00000 0.00700 0.00000
LATT 1
SYMM    -X, .50+Y, .50-Z
SFAC C H N O
UNIT 48 52 4 8
L.S. 20
FMAP 2
PLAN 5
WPDB -2
HTAB
BOND $H
CONF
LIST 4
TEMP -100.0
ACTA
SIZE 0.030 0.100 0.120
WGHT    0.050500    0.357700
FVAR       0.78462
O2    4    0.930091    0.724244    0.208053    11.00000    0.04044    0.02518 =
         0.02814    0.00775   -0.00293   -0.00975
O9    4    0.810669    0.484582    0.617036    11.00000    0.04923    0.03146 =
         0.01787    0.00158    0.00401   -0.00698
N1    3    0.875898    0.622749    0.436029    11.00000    0.02848    0.01898 =
         0.01892   -0.00183   -0.00063   -0.00171
C2    1    0.905382    0.632469    0.274169    11.00000    0.01948    0.02366 =
         0.02065    0.00293   -0.00285   -0.00272
C3    1    0.899927    0.512223    0.196584    11.00000    0.01930    0.02270 =
         0.01837    0.00025    0.00093    0.00035
AFIX  13
H3    2    0.981526    0.485436    0.161327    11.00000   -1.20000
AFIX   0
C4    1    0.800096    0.504964    0.053174    11.00000    0.02423    0.02390 =
         0.01615    0.00142   -0.00118   -0.00060
AFIX  13
H4    2    0.803210    0.565950   -0.034747    11.00000   -1.20000
AFIX   0
C5    1    0.801088    0.378162   -0.003144    11.00000    0.02633    0.02827 =
         0.01978   -0.00657   -0.00194    0.00139
AFIX  43
H5    2    0.830101    0.350297   -0.104472    11.00000   -1.20000
AFIX   0
C6    1    0.754302    0.313225    0.114119    11.00000    0.02626    0.02016 =
         0.02496   -0.00421   -0.00560    0.00053
AFIX  43
H6    2    0.743504    0.230853    0.111307    11.00000   -1.20000
AFIX   0
C7    1    0.721131    0.394227    0.253587    11.00000    0.02146    0.01950 =
         0.01937    0.00155   -0.00121   -0.00161
AFIX  13
H7    2    0.659849    0.364603    0.331144    11.00000   -1.20000
AFIX   0
C8    1    0.848995    0.432719    0.331763    11.00000    0.02093    0.01767 =
         0.01812    0.00116   -0.00194    0.00161
AFIX  13
H8    2    0.903147    0.363934    0.355418    11.00000   -1.20000
AFIX   0
C9    1    0.840797    0.511216    0.480527    11.00000    0.02190    0.02084 =
         0.01882    0.00190   -0.00293    0.00003
C10   1    0.687136    0.503770    0.155631    11.00000    0.02159    0.02098 =
         0.01632   -0.00080   -0.00323   -0.00267
C11   1    0.592615    0.575805    0.160127    11.00000    0.02460    0.02257 =
         0.02447   -0.00377   -0.00555    0.00045
C12   1    0.580508    0.682115    0.051910    11.00000    0.03560    0.02776 =
         0.04173    0.00441   -0.00843    0.00661
AFIX 137
H12A  2    0.648313    0.684483   -0.022731    11.00000   -1.20000
H12B  2    0.582152    0.752554    0.120625    11.00000   -1.20000
H12C  2    0.503166    0.678616   -0.012712    11.00000   -1.20000
AFIX   0
C13   1    0.488381    0.556227    0.271467    11.00000    0.02645    0.03877 =
         0.03341   -0.00688    0.00065    0.00586
AFIX 137
H13A  2    0.504061    0.485963    0.338040    11.00000   -1.20000
H13B  2    0.412692    0.546068    0.204650    11.00000   -1.20000
H13C  2    0.480510    0.623902    0.344217    11.00000   -1.20000
AFIX   0
H1    2    0.879743    0.681161    0.506528    11.00000    0.03814
HKLF 4


REM  DSAA17
REM wR2 = 0.0981, GooF = S = 1.090, Restrained GooF = 1.090 for all data
REM R1 = 0.0370 for 1743 Fo > 4sig(Fo) and 0.0385 for all 1856 data
REM 142 parameters refined using 0 restraints

END

WGHT      0.0501      0.3633

REM Instructions for potential hydrogen bonds
EQIV $1 -x+2, y-1/2, -z+1/2
HTAB C8 O2_$1
EQIV $2 x, -y+3/2, z+1/2
HTAB N1 O2_$2

REM Highest difference peak  0.214,  deepest hole -0.201,  1-sigma level  0.046
Q1    1   0.7841  0.4137  0.2994  11.00000  0.05    0.21
Q2    1   0.8776  0.4722  0.2663  11.00000  0.05    0.18
Q3    1   0.7394  0.5159  0.1037  11.00000  0.05    0.18
Q4    1   0.8915  0.5727  0.2270  11.00000  0.05    0.18
Q5    1   0.6994  0.4554  0.2128  11.00000  0.05    0.17
;

_shelx_res_checksum   21131

_shelx_hkl_file
;
   0  -1   0   -0.10    0.21
   0  -1   0    0.10    0.35
   0  -1   0   -0.00    0.16
  -1   0   0 1546.07   44.80
  -1   0   0 1687.41   51.79
  -1   0   0 1656.40   49.06
   0   0  -1    0.03    0.18
   0   0   1   -0.00    0.24
   0   0   1    0.01    0.24
   0   0   1    0.06    0.36
   0   0   1    0.16    0.95
   0   0  -1   -0.05    1.05
   0   0  -1   -0.07    0.22
   0   0  -1    0.16    0.38
   1  -1   0   38.46    1.73
  -1  -1   0   41.58    2.47
   1  -1   0   40.16    2.54
  -1   1   0   45.54    2.58
  -1   1   0   42.22    1.45
   1  -1   0   38.52    1.35
  -1   1   0   43.75    1.88
  -1   0   1    0.02    0.47
   1   0  -1    0.08    0.47
   1   0  -1   -0.00    0.37
   0   1   1   45.60    1.61
   0  -1   1   45.00    1.55
   0  -1   1   46.80    1.67
   0   1  -1   46.69    1.68
   0  -1  -1   45.79    1.63
   0  -1  -1   44.97    1.71
   0   1  -1   47.04    1.62
   0   1  -1   46.28    6.43
   1   0   1    0.07    0.90
  -1   0  -1   -0.32    1.07
  -1   0  -1   -0.02    0.20
  -1   0  -1   -0.08    0.76
  -1   0  -1    1.00    0.35
  -1   1   1 6495.88  122.69
   1  -1  -1 6308.94  119.27
  -1  -1   1 5610.34  162.45
  -1  -1   1 6566.76  124.14
   1   1  -1 6387.75  120.91
   0  -2   0 4940.45  142.57
   0   2   0 4989.92  143.90
   0  -2   0 4466.48  128.97
  -1  -1  -1  891.91   25.89
   1  -1   1  907.04   27.20
  -1   1  -1  891.29   26.54
  -1   1  -1  931.27   27.15
   1  -1   1  890.12   25.85
  -1  -1  -1  970.22   28.24
  -1   1  -1  929.65   26.99
   1  -1   1  889.90   27.24
  -1   1  -1  833.80   26.24
  -1  -1  -1  923.72   26.86
  -2   0   0 1214.30   37.79
  -2   0   0 1106.80   32.16
   2   0   0 1184.80   34.43
   2   0   0 1156.56   36.49
  -2   0   0 1235.71   36.93
  -1  -2   0   21.93    1.34
  -1  -2   0   20.71    0.91
  -1   2   0   20.44    1.00
   1  -2   0   20.77    0.81
  -1  -2   0   21.28    0.95
  -1   2   0   17.79    0.73
   1  -2   0   19.49    1.00
  -1  -2   0   20.46    0.89
   1  -2   0   20.62    1.52
  -2  -1   0  127.70    6.35
   2  -1   0  120.46    5.89
  -2   1   0  123.41    4.16
  -2  -1   0  109.98    3.49
   2  -1   0  119.27    3.70
  -2   1   0  119.39    3.69
  -2   1   0  130.33    5.54
   0  -2  -1  695.18   20.38
   0  -2   1  710.68   20.77
   0  -2  -1  682.27   20.24
   0   2  -1  678.50   19.80
   0   2   1  656.10   19.20
   0   2  -1  678.60   20.10
   0  -2   1  671.96   20.11
   0  -2  -1  654.47   19.10
   0  -2  -1  664.51   19.38
   0   2   1  583.38   17.01
   0  -2   1  677.26   19.74
   0  -2   1  704.35   22.51
  -2   0   1   -0.27    0.61
   2   0  -1    0.10    0.24
  -2   0  -1    0.14    0.18
   2   0   1   -0.91    0.97
  -2   0  -1    0.55    1.17
   2   0   1   -0.36    1.06
  -2   0  -1   -0.32    1.51
  -1  -2   1  261.23    7.92
  -1   2   1  259.28    7.85
  -1  -2   1  270.33    8.08
   1  -2  -1  260.56    7.97
  -1   2   1  254.65    7.60
   1  -2  -1  258.50    7.74
   1   2  -1  252.20    7.59
  -1  -2   1  263.94    8.15
  -2   1   1  426.82   12.58
  -2  -1   1  405.51   12.48
   2  -1  -1  426.33   12.61
  -2  -1   1  436.55   13.39
   2  -1  -1  454.54   13.91
  -2  -1   1  427.79   12.90
  -2   1   1  449.26   13.52
   2  -1  -1  365.14   10.92
  -2   1   1  416.09   12.32
   1  -2   1  207.87    8.65
  -1  -2  -1  202.67    6.16
   1  -2   1  199.59    6.48
  -1   2  -1  209.43    6.28
  -1  -2  -1  207.86    6.28
  -1   2  -1  217.75    6.91
   1  -2   1  212.19    6.34
  -2   1  -1   66.58    4.69
  -2   1  -1   59.98    2.59
   2  -1   1   60.59    2.85
   2   1   1   53.64    1.84
  -2  -1  -1   59.54    1.96
  -2   1  -1   60.52    1.97
   2  -1   1   58.25    1.91
  -2  -1  -1   60.24    2.82
   2  -1   1   64.89    3.88
   0   0   2  388.43   11.54
   0   0  -2  411.67   12.17
   0   0  -2  414.07   12.28
   0   0   2  406.59   11.98
   2  -2   0 1113.93   32.33
  -2   2   0 1112.42   32.25
  -2  -2   0 1143.24   33.17
  -2   2   0 1111.16   32.45
  -2   2   0 1122.80   33.45
  -2  -2   0 1190.94   35.90
   2  -2   0 1133.24   34.53
   1   0  -2 2326.33   67.45
  -1   0   2 2182.99   63.21
  -1   0   2 2287.61   66.13
   0  -1   2   29.10    1.97
   0   1   2   30.80    1.17
   0   1   2   30.74    1.18
   0  -1  -2   29.15    1.64
   0   1  -2   30.68    1.16
   0  -1   2   30.48    1.19
   0   1  -2   29.28    1.18
   0  -1  -2   27.83    1.16
   0  -3   0    0.11    0.33
   0   3   0   -0.12    0.27
   0  -3   0    0.18    0.47
   0  -3   0    0.14    0.20
   0   3   0    0.18    0.34
  -1   0  -2 2023.70   58.52
  -1   0  -2 2033.43   58.79
   1   0   2 1689.77   48.86
   1   0   2 1996.50   59.19
   1   0   2 1694.86   49.06
  -1   0  -2 2166.11   62.67
  -1   0  -2 2005.25   59.26
   1   1  -2   24.42    1.12
  -1  -1   2   25.19    1.04
  -1  -1   2   25.98    1.93
   1  -1  -2   25.01    1.07
   1   1  -2   24.94    1.03
  -1   1   2   25.32    1.04
   1   1  -2   23.51    1.53
   1  -1  -2   26.76    1.28
  -1  -1   2   24.76    0.99
  -1  -1   2   24.25    1.05
  -3   0   0 5670.71  165.98
  -3   0   0 5335.32  153.89
   3   0   0 5188.03  149.61
   3   0   0 5486.07  159.55
  -3   0   0 5720.72  109.32
   3   0   0 5236.88  154.50
  -1  -3   0  326.39    9.75
   1   3   0  293.71    8.78
  -1   3   0  322.61   10.72
   1  -3   0  318.87   10.52
   1  -3   0  318.39    9.39
  -1  -3   0  320.15    9.48
   1   3   0  325.86    9.66
  -1  -3   0  327.91    9.77
   1  -3   0  310.86    9.94
  -1  -3   0  334.18   10.06
   1   3   0  275.53    8.64
   2  -2  -1   67.36    3.52
   2   2  -1   72.77    5.41
  -2  -2   1   69.95    2.57
  -2   2   1   94.97    4.42
   2   2  -1   71.89    2.41
   2  -2  -1   73.09    2.41
  -2  -2   1   70.39    2.49
  -2   2   1   82.46    2.96
  -2  -2   1   81.28    3.72
  -1   1  -2   53.46    2.65
   1  -1   2   53.49    2.81
  -1   1  -2   52.22    1.76
  -1  -1  -2   52.06    1.75
  -1  -1  -2   54.41    1.85
   1   1   2   51.31    1.71
  -1  -1  -2   55.39    1.92
  -1   1  -2   54.94    1.90
   1  -1   2   51.01    1.76
   2  -2   1 5409.81  155.87
   2  -2   1 5601.97  162.28
  -2  -2  -1 5135.44  148.07
  -2   2  -1 5499.23  158.50
   2  -2   1 5584.00  163.86
  -2   2  -1 5654.18  163.37
  -3   1   0 6281.64  121.12
  -3   1   0 5457.30  157.27
   3  -1   0 5380.28  155.08
  -3  -1   0 5677.40  163.76
  -3  -1   0 5685.89  167.06
  -3   1   0 6109.73  115.92
   3  -1   0 6049.82  115.28
   3  -1   0 5936.54  121.80
   0   3  -1  560.22   17.08
   0   3   1  583.97   17.05
   0  -3  -1  558.03   16.29
   0  -3   1  569.63   16.98
   0  -3  -1  554.40   16.26
   0   3   1  545.41   15.95
   0   3  -1  472.62   14.07
   0   3  -1  523.54   15.42
   0  -3   1  558.14   19.19
   0  -3  -1  574.69   16.92
   0  -3   1  561.42   16.42
   0  -3   1  561.84   16.48
  -3   0   1    0.01    0.26
  -3   0   1    0.07    0.27
   3   0  -1    0.32    0.77
   2   0  -2  254.25    8.01
  -2   0   2  257.94    7.80
  -2   0   2  269.21    8.28
   2   0  -2  270.65    9.12
   0  -2  -2   43.76    1.66
   0  -2   2   43.99    1.51
   0  -2  -2   45.50    7.44
   0   2  -2   46.98    2.39
   0   2   2   44.14    1.60
   0   2  -2   44.20    1.62
   0  -2   2   46.77    2.29
   0   2  -2   43.85    1.54
   0  -2   2   43.60    1.57
   0   2   2   46.17    6.17
   1   3  -1  515.94   15.32
   1  -3  -1  460.98   13.62
  -1  -3   1  535.85   15.93
   1  -3  -1  526.98   15.41
  -1   3   1  529.43   15.47
  -1  -3   1  548.06   16.04
   1  -3  -1  542.38   16.12
  -1  -3   1  565.78   16.64
  -1   3   1  536.78   15.72
  -1  -3   1  482.49   16.91
  -3   0  -1    0.31    0.95
   3   0   1    0.78    1.31
  -3   0  -1   -0.08    0.16
  -1   3  -1   11.75    0.56
  -1  -3  -1   11.59    0.59
  -1  -3  -1   11.98    0.60
  -1  -3  -1   12.15    0.61
  -1   3  -1   11.82    0.82
   1  -3   1   13.49    2.52
  -1  -3  -1   11.57    0.62
   1  -3   1   11.78    0.90
   1  -3   1   12.21    0.57
  -1   3  -1   11.97    1.64
  -3   1   1   20.32    0.96
   3  -1  -1   20.62    0.91
   3   1  -1   17.86    2.49
   3  -1  -1   20.81    1.71
  -3  -1   1   20.52    1.57
  -3   1   1   20.11    0.87
   3  -1  -1   20.02    1.07
  -3  -1   1   20.42    0.94
  -3   1   1   19.65    1.27
   1   2  -2  352.95   10.49
  -1   2   2  347.20   10.33
  -1  -2   2  354.31   11.13
  -1  -2   2  363.96   10.84
  -1  -2   2  315.64    9.56
  -1  -2   2  362.78   10.73
   1   2  -2  289.48    8.77
  -1   2   2  356.07   10.70
   1  -2  -2  349.72   10.78
   1   2  -2  346.43   10.62
   1   2  -2  357.06   10.60
   1  -2  -2  359.56   10.74
  -1   2   2  357.01   10.60
  -2   0  -2 3586.21  104.84
  -2   0  -2 3860.91  111.42
  -2   0  -2 3797.57  110.43
  -2   0  -2 3852.11  111.08
   2   0   2 3485.63  100.52
   2   0   2 3671.06  107.06
   2   1  -2   13.56    0.92
  -2  -1   2   13.76    0.73
   2  -1  -2   13.74    0.64
  -2  -1   2   14.65    0.83
  -2  -1   2   12.51    1.41
   2   1  -2   13.57    1.04
   2   1  -2   14.47    0.90
  -2   1   2   14.10    0.77
   3  -1   1 2622.99   78.05
  -3  -1  -1 2457.54   70.98
  -3   1  -1 2613.80   76.14
   3   1   1 2489.87   72.00
  -3  -1  -1 2555.44   75.53
  -3   1  -1 2726.35   81.72
  -3   1  -1 2537.95   73.27
  -3  -1  -1 2682.97   78.56
   1   2   2 2909.29   83.98
  -1   2  -2 2989.49   86.30
  -1  -2  -2 3026.46   87.45
   1  -2   2 2884.71   84.29
  -1   2  -2 3073.19   88.81
  -1   2  -2 2845.85   84.35
  -1  -2  -2 2931.83   84.67
  -1   2  -2 2931.24   85.14
   1  -2   2 3182.70   92.73
   1  -2   2 2849.09   82.22
   1  -2   2 2995.06   86.47
   1   2   2 2981.27   86.07
   2   3   0   67.70    2.21
  -2  -3   0   73.75    2.78
  -2   3   0   80.82    2.74
   2  -3   0   84.53    2.67
  -2  -3   0   83.30    2.68
   2  -3   0   77.29    3.56
  -2  -3   0   78.65    2.58
  -2  -3   0   81.40    2.66
  -3  -2   0 2292.28   66.49
  -3   2   0 2275.55   66.04
   3  -2   0 2090.33   61.02
   3  -2   0 2147.54   62.05
  -3   2   0 2266.17   65.47
  -3   2   0 2410.96   70.81
   3  -2   0 2126.57   63.78
  -3  -2   0 2310.22   69.42
   3   2   0 2272.32   67.01
  -2   1  -2 2181.07   63.96
  -2   1  -2 2102.84   60.76
  -2  -1  -2 2204.45   64.81
   2  -1   2 2339.39   68.77
  -2  -1  -2 2138.60   61.77
   2   1   2 2073.71   59.92
   2  -1   2 2092.24   61.95
  -2   1  -2 2032.65   58.79
  -2  -1  -2 2084.28   60.30
  -2  -3   1  395.37   11.70
  -2   3   1  367.18   10.81
  -2  -3   1  443.55   15.34
   2  -3  -1  375.58   11.55
  -2   3   1  336.90   10.17
   2  -3  -1  381.81   11.25
   2   3  -1  380.07   11.27
  -2   3   1  383.85   11.36
   2   3  -1  357.48   11.00
  -2  -3   1  393.89   11.82
  -2  -3   1  372.85   11.19
  -3  -2   1    1.59    0.35
   3  -2  -1    1.56    0.31
   3   2  -1    1.52    0.24
  -3   2   1    1.32    0.35
  -3  -2   1    1.81    0.55
   3  -2  -1    1.44    0.86
  -3  -2   1    0.64    1.10
  -3   2   1    1.22    0.63
   3   2  -1    2.37    1.93
   3  -2  -1    1.45    0.39
   2  -3   1    6.03    2.35
   2  -3   1    5.35    0.72
  -2   3  -1    5.39    0.66
  -2   3  -1    6.20    1.75
  -2   3  -1    6.29    0.39
   2  -3   1    5.99    0.38
  -2  -3  -1    5.99    0.48
  -2   2   2  207.51    6.60
  -2  -2   2  200.41    6.20
   2  -2  -2  190.58    5.77
   2   2  -2  199.72    6.37
  -2  -2   2  201.48    6.13
  -2  -2   2  197.16    6.00
   2  -2  -2  188.52    5.92
  -2   2   2  205.01    6.27
   2   2  -2  206.79    6.51
  -2  -2   2  198.77    6.59
  -2   2   2  202.14    6.16
   0   4   0  534.00   15.70
   0   4   0  512.99   15.03
   0   4   0  530.93   15.62
   0   4   0  522.43   15.39
   0  -4   0  515.76   15.28
   0  -4   0  536.85   15.69
   3  -2   1  969.54   28.14
  -3   2  -1  946.22   27.93
  -3  -2  -1  969.03   29.27
  -3  -2  -1  914.07   26.61
   3  -2   1  958.52   30.81
  -3   2  -1  919.63   26.69
   2  -2   2  239.07    8.06
  -2   2  -2  222.53    8.95
  -2  -2  -2  243.31    7.30
  -2   2  -2  243.54    7.31
  -2   2  -2  241.56    7.77
  -2  -2  -2  241.63    7.19
  -2   2  -2  245.58    7.32
   2  -2   2  242.11    8.30
  -2  -2  -2  247.24    7.41
   0   3  -2    4.14    1.90
   0  -3  -2    4.14    0.49
   0  -3   2    3.79    0.38
   0  -3  -2    4.13    0.42
   0   3   2    4.14    0.37
   0  -3  -2    3.88    0.44
   0   3   2    3.85    0.33
   0  -3   2    4.02    0.33
   0  -3   2    3.26    0.69
   0   3  -2    3.85    0.34
  -3   0   2  564.97   16.72
   3   0  -2  508.07   15.40
  -3   0   2  578.16   17.34
  -1   4   0  148.43    4.59
  -1  -4   0  139.38    4.26
  -1   4   0  140.07    4.28
  -1   4   0  136.52    4.40
   1   4   0  141.31    4.38
  -1  -4   0  135.19    4.37
   1   4   0  141.71    4.37
   1   4   0  133.76    4.50
   1  -4   0  141.15    4.52
   1  -4   0  134.86    4.11
  -1  -4   0  141.01    4.46
  -1   4   0  139.55    4.38
   1  -4   0  136.85    4.80
  -1  -4   0  138.54    4.37
   4   0   0  647.80   20.16
  -4   0   0  684.68   20.77
  -4   0   0  664.18   21.59
  -4   0   0  630.34   18.43
   1   3  -2    3.14    0.33
   1  -3  -2    3.08    0.35
  -1  -3   2    3.09    0.37
   1  -3  -2    3.37    0.47
  -1   3   2    4.34    0.39
  -1  -3   2    3.48    0.32
  -1   3   2    3.50    0.29
  -1  -3   2    2.99    0.65
   1   3  -2    3.82    0.51
  -1   3   2    3.52    0.45
   1   3  -2    3.39    0.38
   0   0  -3   -0.03    0.23
   0   0   3   -0.04    0.19
   0   0  -3   -0.16    0.25
   0   0   3    0.05    0.22
   0   4   1   30.01    1.18
   0  -4  -1   38.85    1.50
   0   4   1   41.10    1.43
   0  -4   1   39.56    1.37
   0  -4  -1   38.84    1.33
   0  -4  -1   36.71    1.37
   0  -4   1   38.04    1.37
   0   4   1   38.81    1.37
   0   4   1   31.90    1.31
   0   4  -1   39.21    1.46
   0   4   1   39.68    1.45
   0   4  -1   37.83    1.60
   0  -4   1   39.69    2.97
   0  -4   1   36.32    1.53
  -3  -1   2   -0.08    0.98
  -3  -1   2   -0.21    0.31
  -3  -1   2    0.62    0.47
  -3   1   2    0.40    0.40
   3   1  -2    0.28    0.59
   1  -3   2  617.14   18.05
  -1   3  -2  640.81   19.07
  -1  -3  -2  661.79   19.39
   1   3   2  712.03   20.83
  -1  -3  -2  655.95   19.30
  -1   3  -2  687.90   23.00
   1  -3   2  645.15   20.00
  -1   3  -2  655.76   19.14
   1  -3   2  654.35   19.72
   1  -3   2  659.84   19.23
  -4   1   0  296.39    8.79
   4  -1   0  319.58    9.51
  -4  -1   0  317.24   10.53
  -4  -1   0  313.90    9.37
  -4   1   0  316.78   11.04
  -4  -1   0  316.94   12.04
   4  -1   0  280.47   11.06
   4  -1   0  295.48    9.66
  -4   1   0  310.42    9.62
   3   0   2 1829.69   54.17
  -3   0  -2 1771.01   52.44
   3   0   2 1677.46   48.50
  -3   0  -2 1674.18   48.43
  -3   0  -2 1721.21   51.37
   1   0  -3    0.08    0.25
   1   0  -3    0.22    0.99
  -1   0   3    0.29    0.24
   1   0  -3   -0.11    0.31
  -1   0   3   -0.13    0.22
  -3  -3   0   65.63    2.17
  -3   3   0   64.10    2.28
   3  -3   0   68.09    3.76
   3  -3   0   66.12    2.14
  -3  -3   0   68.96    3.56
   0   1  -3   -0.12    0.20
   0   1   3    0.22    0.24
   0   1  -3    0.15    0.27
   0  -1  -3   -0.05    0.25
   0   1   3   -0.03    0.22
   0  -1   3    0.01    0.22
   0   1   3    0.05    0.19
   0   1  -3    0.13    0.20
   0  -1   3   -0.01    0.15
   0  -1   3    3.85    1.08
  -4   0   1    0.03    0.85
  -4   0   1   -0.00    0.48
  -4   0   1    0.07    0.25
   4   0  -1    0.38    0.97
  -1   4   1  144.75    4.53
  -1  -4   1  159.85    5.09
   1  -4  -1  163.50    4.95
   1   4  -1  162.76    5.13
  -1   4   1  159.69    4.88
  -1  -4   1  164.06    5.06
  -1  -4   1  160.85    4.88
  -1   4   1  167.69    5.06
  -1  -4   1  136.15    5.18
   1  -4  -1  155.01    4.82
   1  -4  -1  156.23    5.01
  -1  -4  -1 1668.54   48.36
   1   4   1 1669.73   48.33
   1  -4   1 1595.85   49.97
  -1  -4  -1 1620.48   46.94
   1  -4   1 1704.42   49.27
   1  -4   1 1642.69   47.89
   1   4   1 1637.93   47.37
  -1   4  -1 1666.38   48.28
  -1   4  -1 1699.92   49.98
   1   4   1 1690.82   49.10
  -1   4  -1 1644.44   47.78
  -1  -4  -1 1658.53   47.97
  -1   0  -3    0.11    0.18
  -1   0  -3    0.14    0.25
   1   0   3    0.13    0.16
   3  -1   2  239.78    8.22
  -3   1  -2  241.69    7.19
  -3   1  -2  253.20    8.38
   3   1   2  236.24    7.05
  -3   1  -2  235.50    9.02
  -3  -1  -2  236.84    7.04
  -3  -1  -2  259.01    8.75
  -3  -1  -2  248.32    8.32
   1   1  -3   22.00    1.03
  -1  -1   3   21.07    1.66
   1   1  -3   21.55    0.91
  -1  -1   3   21.79    0.94
  -1  -1   3   22.37    0.91
  -1   1   3   21.48    0.90
   1   1  -3   21.14    1.56
   1  -1  -3   23.15    1.11
  -1   1   3   19.54    0.90
   4   0   1    0.08    1.08
   4   0   1    0.02    0.82
  -4   0  -1   -1.54    2.26
  -4   0  -1    0.04    0.17
   4   0   1    0.08    0.22
  -4  -1   1  115.56    4.73
  -4  -1   1  105.78    3.38
   4  -1  -1  111.79    3.97
  -4  -1   1  117.00    4.75
   4   1  -1  106.91    5.74
  -4   1   1  116.71    3.77
  -4  -1   1  115.39    3.58
  -4   1   1  114.76    4.22
  -4   1   1  115.85    3.64
   4  -1  -1  110.27    3.51
  -1  -1  -3    5.13    1.10
   1   1   3    5.24    0.35
   1  -1   3    5.38    0.34
  -1  -1  -3    5.64    0.40
  -1   1  -3    5.56    0.44
   1  -1   3    4.92    0.39
   1   1   3    5.19    0.39
  -1   1  -3    4.77    0.35
   1  -1   3    4.19    0.96
  -1  -1  -3    4.92    0.39
  -1  -1  -3    5.35    0.42
  -1   1  -3    4.72    0.37
  -2  -4   0   21.75    0.95
  -2  -4   0   23.02    1.11
   2   4   0   21.94    0.87
  -2  -4   0   23.00    0.94
  -2   4   0   22.45    1.25
  -2  -4   0   22.36    0.91
   2  -4   0   22.33    0.86
  -2   4   0   21.66    1.00
   2  -4   0   21.87    1.63
  -3  -3   1  508.57   10.20
   3   3  -1  504.93   14.79
  -3   3   1  527.03   15.51
   3  -3  -1  526.30   16.25
  -3   3   1  513.55   10.53
   3  -3  -1  466.52   13.92
  -3  -3   1  511.20   17.09
  -3  -3   1  529.27   15.86
   3   3  -1  541.40   17.03
   3  -3  -1  506.68   14.87
  -2  -3   2    1.09    0.24
  -2  -3   2    0.58    0.25
  -2   3   2    0.92    0.34
  -2   3   2    1.29    0.23
   2  -3  -2    2.88    0.31
  -2  -3   2    1.02    0.46
   2   3  -2    1.18    0.38
  -2   3   2    0.87    0.25
   2  -3  -2    3.37    0.36
  -2   3   2    0.92    0.50
  -2  -3   2    0.89    0.32
   2   3  -2    1.05    0.93
   2  -3  -2    1.25    0.49
   4   1   1 2135.03   40.66
  -4  -1  -1 2184.57   43.40
  -4  -1  -1 2111.15   40.21
  -4   1  -1 2210.95   42.02
  -4   1  -1 2163.56   42.13
  -4   1  -1 2117.68   44.44
   4  -1   1 2266.96   48.38
  -4  -1  -1 2234.14   46.18
   4  -1   1 2135.15   42.35
   3  -2  -2    0.33    0.28
   3   2  -2    0.34    0.26
   3   2  -2    0.18    0.79
   3  -2  -2    0.33    0.46
  -3  -2   2    0.31    0.30
  -3  -2   2    0.51    0.42
  -3  -2   2   -0.03    0.53
  -3   2   2    0.36    0.42
  -3   2   2    0.59    0.50
  -3   2   2    0.23    0.22
  -3   2   2    0.23    0.20
   3  -3   1  319.79   10.14
  -3  -3  -1  330.62    6.73
  -3  -3  -1  353.45    8.16
   3  -3   1  346.17    6.86
  -3   3  -1  339.29    6.73
  -3   3  -1  347.86    7.39
  -4   2   0   97.51    3.54
  -4   2   0  100.75    2.26
   4  -2   0   95.19    2.86
  -4   2   0  100.82    2.65
   4  -2   0  100.35    2.28
   4   2   0  100.98    3.79
  -4  -2   0  105.03    5.17
  -4  -2   0   96.62    2.31
   4  -2   0   98.61    4.92
   2   0  -3   -0.12    0.30
  -2   0   3   -0.03    0.23
   2   0  -3    0.39    0.34
   2   0  -3    0.20    0.80
   2  -3   2  662.50   13.92
   2  -3   2  653.81   15.12
  -2  -3  -2  642.05   12.42
  -2   3  -2  629.96   12.85
  -2   3  -2  665.57   16.99
  -2  -3  -2  664.05   12.95
  -2   3  -2  636.09   12.35
  -2  -3  -2  650.61   12.70
   2  -3   2  658.06   12.72
   0   2  -3   63.23    1.68
   0  -2  -3   67.03    1.71
   0   2  -3   59.54    2.15
   0  -2  -3   61.62    1.71
   0   2   3   65.60    1.68
   0  -2   3   65.73    1.68
   0   2   3   66.33    1.66
   0   2  -3   67.26    1.68
   0   2  -3   65.99    1.64
   0   2   3   64.75    1.61
   0  -2   3   66.21    2.81
   2  -4  -1  217.11    4.45
  -2  -4   1  228.86    4.74
  -2   4   1  212.75    4.34
  -2  -4   1  217.56    4.74
   2   4  -1  228.85    4.78
  -2   4   1  219.76    4.59
   2   4  -1  222.32    5.16
  -2  -4   1  214.81    4.65
  -2  -4   1  223.46    7.22
  -2  -4   1  212.70    4.53
   2  -4  -1  216.98    5.11
  -3   2  -2  246.11    5.13
   3  -2   2  223.54    6.34
   3  -2   2  228.89    6.09
   3   2   2  238.70    4.97
  -3   2  -2  234.66    5.59
  -3   2  -2  237.78    4.83
  -3  -2  -2  234.44    4.76
  -3  -2  -2  241.95    5.94
   2   1  -3    1.00    0.38
   2   1  -3    0.44    0.42
  -2  -1   3    1.40    0.78
  -2  -1   3    0.57    0.32
  -2   1   3    0.46    0.28
  -2  -1   3    0.72    0.23
   2   1  -3    0.69    0.74
   2  -1  -3    0.74    0.47
  -2   4  -1   73.93    2.79
   2  -4   1   77.51    4.49
  -2  -4  -1   75.05    1.83
  -2  -4  -1   74.21    1.79
   2  -4   1   78.58    2.32
  -2   4  -1   74.55    2.06
  -2  -4  -1   73.22    1.77
   2  -4   1   75.89    1.75
  -2   4  -1   78.98    1.92
  -1  -2   3  627.28   12.37
   1  -2  -3  582.40   11.51
  -1   2   3  621.72   12.15
  -1  -2   3  624.39   13.83
   1   2  -3  595.28   12.43
  -1  -2   3  625.62   12.18
   1   2  -3  602.50   11.84
   1   2  -3  620.88   12.17
   1  -2  -3  641.45   12.93
   1   2  -3  593.36   11.82
  -1   2   3  590.53   11.74
   4  -2  -1  391.59    9.61
  -4  -2   1  410.92    8.24
  -4   2   1  430.71    9.29
   4   2  -1  453.87   12.74
  -4  -2   1  398.16    9.87
  -4   2   1  426.05    8.59
   4  -2  -1  433.98    8.68
   4  -2  -1  400.55    8.45
   2   0   3    0.04    0.16
  -2   0  -3   -1.13    0.89
  -2   0  -3   -0.00    0.19
  -2   0  -3    0.01    0.19
   1  -2   3  403.25    8.01
   1   2   3  407.56    8.10
  -1  -2  -3  417.88    8.40
  -1   2  -3  425.29    9.79
  -1   2  -3  432.03    8.65
   1  -2   3  410.56    9.74
   1   2   3  420.94    8.29
  -1   2  -3  407.33    8.07
   1   2   3  431.70    8.53
  -1  -2  -3  415.87    8.28
  -4   2  -1  294.18    5.89
   4  -2   1  295.43    7.15
  -4   2  -1  295.03    9.01
  -4   2  -1  289.68    6.45
   4  -2   1  282.04    5.67
  -4  -2  -1  279.70    5.71
  -4  -2  -1  304.55    8.44
   4  -2   1  294.96    9.24
   4   2   1  307.39    7.37
   0  -4   2   33.66    1.02
   0  -4  -2   32.49    0.98
   0   4  -2   33.41    1.08
   0  -4   2   33.85    1.42
   0  -4   2   33.66    1.86
   0  -4  -2   34.53    1.10
   0   4  -2   33.57    0.99
   0  -4   2   33.80    0.96
   0   4   2   34.31    0.95
   0  -4  -2   33.25    1.02
   0   4  -2   35.36    2.56
   2  -1   3  345.97    8.54
  -2  -1  -3  346.78    8.36
  -2   1  -3  338.17    8.11
   2  -1   3  346.83    6.99
  -2  -1  -3  346.85    7.01
   2   1   3  335.49    6.65
   2   1   3  364.38    7.34
   2  -1   3  330.47    6.57
  -2   1  -3  343.03    6.84
  -2  -1  -3  346.53    6.96
  -2  -1  -3  341.43    6.81
  -2   1  -3  336.83    6.81
  -4   0   2    7.94    0.48
  -4   0   2    7.76    0.78
   4   0  -2    9.04    1.12
  -4   0   2    8.18    0.70
   1   4  -2 2726.51   51.98
  -1  -4   2 2793.79   81.95
   1  -4  -2 2703.47   51.42
  -1  -4   2 2812.94   83.08
   1   4  -2 2804.70   82.48
   1   4  -2 2681.53   50.93
  -1   4   2 2737.86   51.93
   1  -4  -2 2764.52   52.64
  -1   4   2 2719.42   51.57
  -1  -4   2 2850.29   83.70
  -1   4   2 2875.56   84.65
   0  -5   0    0.16    0.45
   0   5   0    0.01    0.25
   0  -5   0    0.05    0.33
   0   5   0   -0.01    0.19
   0   5   0    0.17    0.32
   0  -5   0   -0.04    0.15
   0   5   0    0.01    0.16
  -1   4  -2 1198.94   22.98
  -1   4  -2 1222.53   23.54
  -1   4  -2 1249.78   27.57
   1  -4   2 1223.65   23.40
  -1  -4  -2 1180.78   22.61
  -1  -4  -2 1176.00   22.72
   1  -4   2 1194.40   23.01
   1  -4   2 1179.45   23.76
  -1  -4  -2 1213.15   23.38
  -1   4  -2 1097.17   21.47
   1   4   2 1171.82   22.47
   1  -4   2 1131.12   24.74
   4  -1  -2  787.74   15.50
  -4  -1   2  791.00   15.89
  -4  -1   2  791.97   15.79
  -4   1   2  756.35   15.06
   4   1  -2  768.49   17.13
   2  -2  -3  731.26   14.59
   2   2  -3  836.46   16.41
   2  -2  -3  804.45   16.29
   2   2  -3  807.17   16.14
  -2  -2   3  848.12   18.03
   2  -2  -3  868.71   16.73
  -2   2   3  823.17   16.00
  -2   2   3  771.44   15.02
  -2  -2   3  846.91   16.40
  -2  -2   3  857.75   16.58
  -2  -2   3  866.20   16.86
  -2   2   3  819.63   16.10
   2   2  -3  857.31   17.19
  -3  -4   0   25.21    0.84
  -3  -4   0   23.52    1.42
  -3   4   0   24.02    0.92
  -3  -4   0   22.66    1.12
  -3  -4   0   23.07    0.81
   3  -4   0   23.98    1.97
  -3  -4   0   22.21    1.52
  -3   4   0   19.36    1.14
   3  -4   0   25.22    0.78
  -3   3   2   30.94    0.93
  -3  -3   2   30.83    1.07
   3  -3  -2   32.32    1.40
  -3  -3   2   31.38    1.00
  -3  -3   2   31.94    1.16
  -3  -3   2   32.30    1.31
   3  -3  -2   31.14    1.00
   3   3  -2   27.38    1.27
   3  -3  -2   32.19    1.07
   3   3  -2   31.46    1.05
  -3   3   2   30.47    0.95
   3   3  -2   29.86    2.84
  -3   3   2   31.50    1.10
  -1   5   0   10.69    0.47
   1   5   0   10.71    0.51
  -1   5   0   10.02    0.64
  -1  -5   0   10.38    0.60
   1   5   0   10.40    0.74
  -1  -5   0   10.45    0.50
  -1  -5   0   10.63    0.62
   1  -5   0    9.66    0.65
  -1   5   0    9.50    0.47
   1  -5   0    9.94    0.43
  -1   5   0   10.54    0.64
   1  -5   0   10.86    1.00
   1   5   0   10.52    0.50
  -1  -5   0   10.49    0.46
   4   0   2  212.29    5.58
  -4   0  -2  215.33    4.39
   4   0   2  213.78    4.39
  -4   0  -2  226.94    6.15
  -4   0  -2  235.44    7.40
  -4  -3   0    0.57    1.42
   4  -3   0    0.64    1.51
   4  -3   0    0.59    0.49
  -4  -3   0    0.85    0.22
  -4   3   0    0.55    0.38
   4  -3   0    0.68    0.22
  -4   3   0    0.88    0.19
  -4   3   0    0.95    0.89
   4   3   0    0.65    0.72
   3   0  -3   -0.08    0.72
   3   0  -3   -0.32    0.50
  -3   0   3   -0.13    0.27
  -3   0   3    0.12    0.30
   3   0  -3    0.05    0.40
   0  -3   3  220.57    4.51
   0   3  -3  235.49    6.35
   0   3  -3  230.67    4.76
   0  -3   3  236.06    4.92
   0   3   3  226.15    4.73
   0   3   3  223.33    4.63
   0   3  -3  225.66    5.21
   0   3  -3  226.75    4.71
   0   3   3  220.18    4.63
   0  -3   3  222.96    5.70
   0  -3  -3  226.16    4.76
   0  -3  -3  216.26    4.74
  -2   2  -3    2.96    1.28
  -2   2  -3    0.77    0.23
  -2  -2  -3    0.93    0.26
  -2  -2  -3    1.24    0.19
  -2   2  -3    0.76    0.19
   2   2   3    1.11    0.17
   2  -2   3    0.85    0.20
   2  -2   3    1.39    0.81
  -2   2  -3    0.79    0.78
   2  -2   3    1.16    0.26
  -2  -2  -3    1.30    0.26
   0   5   1  331.08    6.62
   0  -5   1  345.51    6.86
   0  -5   1  337.17    7.14
   0  -5  -1  325.36    6.45
   0   5   1  335.99    6.71
   0  -5  -1  348.17    7.10
   0  -5  -1  335.58    6.96
   0   5  -1  317.37    6.38
   0   5   1  333.86    6.75
   0   5  -1  339.58    7.03
   0   5  -1  344.74    7.02
   0  -5   1  333.41    6.73
   0  -5   1  335.46    8.91
  -5   0   0   95.63    2.21
  -5   0   0   98.02    4.31
  -5   0   0   94.92    2.97
   5   0   0   99.83    3.43
  -4  -1  -2    4.18    0.30
   4  -1   2    3.47    0.29
  -4  -1  -2    3.59    1.08
  -4   1  -2    3.56    0.79
   4   1   2    3.75    0.33
  -4   1  -2    3.53    0.29
  -4  -1  -2    4.37    1.33
  -4   1  -2    3.59    1.76
   4  -1   2    3.47    1.12
  -3  -4   1  403.27    8.22
  -3  -4   1  418.78    8.68
   3  -4  -1  386.77    7.71
  -3  -4   1  430.20    8.51
   3  -4  -1  424.95    9.53
  -3   4   1  406.38    8.01
  -3  -4   1  393.52    7.96
  -3  -4   1  403.75   11.70
  -3   4   1  409.48    8.21
   3   4  -1  406.85    8.06
   3  -4  -1  397.72    8.18
  -3   3  -2    5.16    0.35
  -3   3  -2    6.40    2.11
  -3  -3  -2    4.96    0.37
  -3   3  -2    5.06    0.68
   3  -3   2    4.77    0.33
  -3  -3  -2    5.09    0.32
   3  -3   2    4.02    1.42
   3  -3   2    6.97    0.96
  -3  -1   3 1155.93   22.27
   3   1  -3 1212.90   24.19
   3   1  -3 1152.78   23.06
  -3  -1   3 1213.86   23.53
   3  -1  -3 1215.86   23.28
   3   1  -3 1139.59   22.41
  -3   1   3 1175.22   22.63
   1  -3  -3  146.54    3.65
  -1   3   3  143.88    3.25
  -1   3   3  146.19    3.19
   1   3  -3  147.48    3.23
   1  -3  -3  145.86    3.30
  -1  -3   3  145.60    3.12
   1   3  -3  146.98    3.25
  -1  -3   3  146.24    3.24
  -1   3   3  146.80    3.24
  -1  -3   3  144.60    4.14
   1   3  -3  151.05    3.74
   1  -3  -3  142.72    3.06
  -2  -4   2 2102.17   40.65
   2   4  -2 2179.76   42.07
  -2  -4   2 2108.75   40.22
   2  -4  -2 2056.84   39.36
  -2  -4   2 2100.96   39.93
   2  -4  -2 2124.97   40.87
  -2   4   2 2049.82   38.95
   2  -4  -2 2108.60   40.22
   2   4  -2 2091.13   39.94
  -2   4   2 2051.33   38.94
  -2   4   2 2043.93   39.54
  -4  -3   1  166.25    4.12
   4   3  -1  181.19    5.59
  -4  -3   1  165.83    5.74
   4  -3  -1  176.03    5.21
  -4  -3   1  174.64    3.86
   4  -3  -1  170.05    3.98
  -4   3   1  174.12    3.81
   4  -3  -1  177.54    3.79
  -4   3   1  176.83    4.30
  -1  -5   1    2.33    0.26
   1   5  -1    2.37    0.35
   1   5  -1    2.65    0.30
  -1  -5   1    2.31    0.28
  -1  -5   1    2.66    0.47
   1  -5  -1    2.45    0.40
   1   5  -1    2.26    0.36
  -1   5   1    6.06    0.43
   1  -5  -1    2.44    0.51
  -1  -5   1    2.33    0.74
   1  -5  -1    2.49    0.24
  -1   5   1    2.57    0.24
  -1   5   1    2.45    0.32
   3  -4   1   44.65    1.16
  -3   4  -1   43.26    2.28
  -3   4  -1   41.88    1.10
  -3  -4  -1   45.18    1.23
  -3   4  -1   44.13    1.47
  -3  -4  -1   44.67    1.21
   3  -4   1   44.13    3.60
   1  -5   1   18.58    0.95
  -1   5  -1   17.95    1.15
   1  -5   1   17.49    2.12
  -1  -5  -1   18.23    0.62
   1   5   1   18.03    0.69
  -1   5  -1   17.17    1.07
  -1   5  -1   19.12    0.72
   1   5   1   18.50    0.69
  -1  -5  -1   17.90    0.74
   1   5   1   16.70    0.61
  -1  -5  -1   17.48    0.73
   1  -5   1   18.85    0.64
   5   1   0    1.52    1.29
   5  -1   0   16.14    2.58
  -5  -1   0    2.71    0.92
  -5   1   0    2.62    0.28
  -5  -1   0    2.44    0.31
   5  -1   0    3.53    0.33
  -5   1   0    2.63    0.57
   5  -1   0    3.13    0.86
  -5  -1   0    1.46    1.56
   1   3   3    0.27    0.20
   1   3   3    0.26    0.21
  -1  -3  -3    0.49    0.25
  -1   3  -3   -0.59    1.08
  -1   3  -3    0.19    0.17
   1  -3   3   -0.00    0.19
   1   3   3    0.31    0.19
   1   3   3    0.40    0.13
  -1  -3  -3    0.03    0.23
   1  -3   3    0.86    0.80
  -4  -2   2   12.69    0.80
  -4  -2   2   13.81    0.87
  -4  -2   2   13.53    0.98
   4   2  -2   12.97    1.79
   4  -2  -2   13.31    0.69
  -4   2   2   13.90    0.56
   4  -2  -2   11.69    0.55
  -4   2   2   14.75    0.81
   5   0  -1   -1.58    1.61
  -5   0   1   -0.03    0.85
  -5   0   1   -0.01    0.21
  -3   0  -3    0.11    0.21
  -3   0  -3    0.32    0.92
  -3   0  -3    0.03    0.16
  -3   0  -3   -0.32    0.68
   3   0   3   -0.01    0.15
   2  -4   2  177.07    4.50
  -2   4  -2  181.79    4.24
  -2  -4  -2  170.86    3.61
   2  -4   2  172.03    3.58
  -2   4  -2  177.15    3.71
  -2  -4  -2  164.27    3.46
   2   4   2  182.69    3.84
  -2   4  -2  169.20    3.63
  -2  -4  -2  172.72    3.70
   2  -4   2  191.64    6.54
  -2   4  -2  177.05    6.34
  -2  -4  -2  173.59    3.70
  -2  -4  -2  176.21    3.70
  -4   3  -1    9.75    0.44
   4  -3   1   10.10    2.46
   4  -3   1   10.07    1.00
  -4   3  -1    8.96    0.69
  -4  -3  -1    9.45    0.51
  -4  -3  -1    8.24    1.21
   4  -3   1    9.02    0.43
  -2  -5   0   89.00    2.18
   2  -5   0   90.94    2.04
  -2   5   0   92.01    2.47
  -2  -5   0   88.86    2.21
   2   5   0   88.49    2.03
   2  -5   0   90.64    3.26
  -2  -5   0   87.76    2.02
  -2   5   0   89.15    2.02
  -2  -5   0   92.03    2.21
   2  -5   0   77.90    2.16
  -2   5   0   90.29    2.21
  -5  -1   1  271.54    6.56
   5  -1  -1  259.56    5.39
  -5  -1   1  269.10    5.58
  -5   1   1  254.69    5.24
  -5   1   1  263.89    6.41
  -5  -1   1  269.51    7.01
   5   1  -1  263.36    8.98
   5  -1  -1  273.34    6.68
  -5   1   1  263.21    5.61
  -3   1  -3  624.73   13.58
  -3  -1  -3  591.31   13.14
  -3  -1  -3  593.23   11.61
   3   1   3  616.50   11.96
   3  -1   3  577.43   11.27
  -3   1  -3  597.82   11.71
   3  -1   3  571.66   12.86
  -3  -1  -3  597.07   11.64
  -3   1  -3  598.17   11.63
  -3  -1  -3  598.56   12.75
  -5   0  -1    0.06    0.74
   5   0   1    0.65    0.76
   5   0   1   -0.01    0.20
  -5   0  -1    0.37    0.20
  -5   0  -1    1.47    2.02
  -4   2  -2   68.33    2.28
  -4  -2  -2   66.35    1.59
  -4   2  -2   66.69    1.58
   4  -2   2   65.31    3.05
  -4  -2  -2   63.92    2.73
   4   2   2   65.61    1.68
   2  -3  -3    2.11    0.27
   2  -3  -3    2.23    0.52
  -2  -3   3    2.19    0.30
  -2   3   3    2.09    0.36
  -2   3   3    1.94    0.32
   2   3  -3    2.30    0.48
  -2  -3   3    2.12    0.31
   2   3  -3    2.12    0.35
  -2   3   3    2.58    0.32
  -2  -3   3    2.08    0.25
  -3   2   3   87.82    2.38
   3   2  -3   87.45    2.42
  -3   2   3   84.84    2.07
  -3  -2   3   85.16    2.06
   3   2  -3   81.34    2.41
   3  -2  -3   83.97    1.96
  -3  -2   3   86.61    3.24
   3   2  -3   83.86    2.44
  -3   2   3   81.70    2.03
  -3  -2   3   83.50    2.16
  -5   1  -1  120.69    5.39
   5  -1   1  121.29    3.99
  -5  -1  -1  121.55    4.00
  -5  -1  -1  127.07    5.78
  -5   1  -1  122.46    3.43
   5  -1   1  124.84    5.05
   5   1   1  128.41    2.90
  -5  -1  -1  122.25    2.68
  -5   1  -1  124.19    2.70
  -2  -5   1   12.07    0.52
  -2   5   1   11.54    0.47
  -2  -5   1   10.93    0.74
  -2  -5   1   11.40    0.68
   2   5  -1   11.32    0.80
  -2  -5   1   12.06    0.59
  -2   5   1   11.88    0.56
   2  -5  -1   11.56    0.48
  -2   5   1   12.41    0.65
   2  -5  -1   13.17    0.95
   2   5  -1   11.61    0.56
  -5   2   0   71.79    1.71
  -5   2   0   68.77    2.01
   5  -2   0   72.95    2.57
   5  -2   0   73.98    1.81
  -5   2   0   74.86    3.15
  -5  -2   0   72.65    4.31
   5   2   0   75.41    3.30
   5  -2   0   73.13    4.38
  -5  -2   0   70.94    1.81
  -2  -5  -1   55.44    1.39
  -2   5  -1   57.30    1.48
  -2   5  -1   54.69    1.59
   2  -5   1   54.98    1.81
   2   5   1   57.27    1.45
   2  -5   1   53.11    3.57
   2  -5   1   55.54    1.36
  -2   5  -1   54.60    2.05
  -2  -5  -1   60.66    1.89
  -2  -5  -1   56.55    1.49
  -2  -5  -1   54.92    1.46
   0   0   4  102.83    2.32
   0   0   4  103.53    2.31
   0   0  -4  108.73    3.73
   0   0  -4  101.98    2.46
   0   0  -4  102.99    2.38
  -2   3  -3   22.82    0.75
  -2  -3  -3   23.51    0.83
  -2  -3  -3   22.71    0.79
   2  -3   3   23.33    1.47
  -2   3  -3   23.27    2.46
  -2  -3  -3   21.94    0.79
  -2   3  -3   21.08    1.16
   2  -3   3   22.58    1.54
   2  -3   3   24.58    0.84
   1   0  -4  201.74    5.64
   1   0  -4  193.37    4.29
   1   0  -4  198.24    4.23
  -1   0   4  206.37    4.30
  -1   0   4  207.04    4.33
   5  -2  -1    3.02    0.56
  -5  -2   1    1.89    0.28
  -5  -2   1    2.06    1.07
  -5   2   1    1.49    0.75
  -5   2   1    1.95    0.26
   5  -2  -1    2.20    0.30
  -5   2   1    1.73    0.33
  -5  -2   1    2.08    0.32
   5   2  -1    2.81    1.68
   5  -2  -1    3.02    1.39
  -3   2  -3   55.71    2.14
  -3  -2  -3   54.20    1.42
  -3  -2  -3   55.77    1.43
  -3   2  -3   54.37    1.43
  -3  -2  -3   49.83    1.26
  -3   2  -3   61.02    3.70
  -3   2  -3   53.74    1.81
   3  -2   3   59.31    2.33
   3   2   3   52.78    1.33
   3  -2   3   55.01    1.83
   3  -2   3   56.03    2.91
   0  -1   4  339.86    6.77
   0   1  -4  345.10    6.95
   0  -1  -4  357.72    8.58
   0  -1   4  348.66    8.59
   0   1   4  336.66    6.72
   0   1  -4  351.13    7.10
   0   1   4  347.99    6.96
   0  -1  -4  342.74    7.05
   0   1   4  350.06    7.07
   0   1  -4  340.07    6.98
   0   1  -4  359.14    8.60
   0  -1   4  322.22    6.54
   3  -4  -2   31.86    1.29
  -3  -4   2   35.39    1.56
  -3   4   2   33.29    1.36
  -3  -4   2   34.24    1.30
  -3   4   2   31.75    1.16
   3   4  -2   30.84    1.49
   3  -4  -2   30.36    1.48
   3   4  -2   32.75    1.29
  -3  -4   2   32.62    1.33
  -3   4   2   31.87    1.18
  -3  -4   2   32.46    1.25
   3  -4  -2   37.91    1.41
  -4  -3   2  131.90    4.40
   4   3  -2  123.85    6.33
   4  -3  -2  127.91    4.65
  -4  -3   2  126.24    4.28
  -4   3   2  124.39    4.10
  -4   3   2  122.54    3.85
   4  -3  -2  122.91    3.92
  -4  -3   2  126.65    4.29
  -4   3   2  119.78    3.76
   4  -3  -2  125.43    4.08
   4   3  -2  125.79    3.95
  -1   0  -4   18.40    0.81
  -1   0  -4   17.27    0.81
   1   0   4   18.85    0.77
  -1   1   4  123.31    3.94
  -1  -1   4  119.88    4.72
   1   1  -4  118.87    3.90
   1  -1  -4  121.70    4.02
   1   1  -4  117.09    3.74
   1   1  -4  118.88    4.62
  -1  -1   4  119.12    3.81
   1  -1  -4  117.88    4.63
  -1  -1   4  118.57    3.73
  -1   1   4  123.24    3.90
  -1  -1   4  116.49    3.67
  -1   1   4  122.45    3.86
   4  -4   0   26.15    2.42
   4  -4   0   23.14    0.90
  -4   4   0   22.20    1.05
   4  -4   0   25.30    1.29
  -4  -4   0   24.76    1.00
  -4  -4   0   26.48    2.26
   1   5  -2  106.33    3.52
  -1   5   2  101.87    3.20
   1  -5  -2   98.52    3.15
  -1  -5   2  103.80    3.64
   1  -5  -2  100.54    3.39
  -1   5   2  101.65    3.23
  -1   5   2  105.51    3.55
   1   5  -2  103.88    3.40
  -1  -5   2  101.36    3.21
  -1   5   2  102.64    3.32
   1   5  -2   98.85    3.30
  -1  -5   2  101.49    3.28
  -5  -2  -1   78.11    4.45
  -5  -2  -1   75.04    3.30
   5   2   1   76.61    3.27
  -5  -2  -1   74.80    2.46
  -5   2  -1   76.63    2.47
  -5   2  -1   71.84    2.75
   5  -2   1   70.25    3.16
   5  -2   1   69.92    4.40
  -5   2  -1   77.27    4.45
   4   0  -3   -0.48    0.53
  -4   0   3   -0.28    0.32
  -4   0   3   -0.17    0.34
   0  -4  -3   95.38    3.33
   0   4  -3   89.49    3.17
   0  -4   3   91.35    3.53
   0   4  -3   91.86    2.98
   0   4  -3   95.95    5.11
   0  -4   3   90.84    2.95
   0   4   3   90.58    2.88
   0   4   3   91.71    2.99
   0  -4  -3   89.91    2.97
   0  -4   3   90.07    2.87
   0   4  -3   86.04    2.87
  -5   0   2  461.08   14.15
   5   0  -2  508.85   16.83
  -5   0   2  474.59   14.23
   1   5   2   29.86    1.14
   1  -5   2   30.02    1.10
   1  -5   2   30.46    1.17
   1  -5   2   28.87    1.45
  -1  -5  -2   29.13    1.09
   1  -5   2   30.17    2.65
  -1  -5  -2   28.95    1.11
  -1   5  -2   30.55    1.91
  -1  -5  -2   29.59    1.19
  -1   5  -2   30.63    1.20
  -1   1  -4  746.01   22.18
   1  -1   4  727.31   22.81
  -1  -1  -4  739.67   22.00
   1   1   4  728.17   21.55
   1  -1   4  745.75   22.05
  -1   1  -4  738.26   21.89
  -1  -1  -4  750.65   22.28
  -1   1  -4  725.08   21.50
   1   1   4  689.46   20.45
   3  -4   2   10.42    0.51
  -3  -4  -2   11.05    0.55
   3  -4   2   11.01    1.01
  -3  -4  -2   10.42    0.57
  -3   4  -2   10.42    0.52
  -3   4  -2   10.63    2.05
   3  -4   2   11.18    1.96
  -3   4  -2   10.58    0.84
  -3   4  -2   10.17    0.56
  -1  -4   3   10.02    0.96
   1   4  -3    8.90    0.59
  -1   4   3    8.43    0.53
   1  -4  -3    8.85    0.60
   1   4  -3    9.59    1.56
  -1  -4   3   10.08    0.57
   1  -4  -3    7.85    0.49
  -1   4   3    8.42    0.45
  -1   4   3    9.16    0.55
   1   4  -3    9.58    0.76
  -1  -4   3    9.08    0.49
   1   4  -3    8.77    0.54
   1   4  -3    8.84    0.50
  -3  -5   0   51.64    1.83
  -3   5   0   52.57    1.76
   3  -5   0   53.39    2.97
  -3  -5   0   53.33    1.89
  -3   5   0   51.27    1.87
  -3   5   0   54.19    2.20
  -3  -5   0   54.64    1.88
  -3  -5   0   58.17    2.59
   3  -5   0   52.88    1.77
   3   5   0   53.79    1.81
  -3  -5   0   56.36    2.16
   4  -1  -3  806.96   23.90
  -4  -1   3  822.58   24.59
  -4  -1   3  805.15   23.94
  -4   1   3  771.25   22.96
  -4   1   3  688.32   20.49
   4  -1  -3  787.33   23.83
   4   1  -3  780.05   23.74
   4   4  -1   22.31    0.88
  -4  -4   1   21.61    0.97
  -4   4   1   21.25    0.96
  -4  -4   1   21.93    1.17
   4  -4  -1   20.94    0.86
   4  -4  -1   21.91    1.64
  -4  -4   1   22.37    2.39
  -4   4   1   22.09    0.87
   4  -4  -1   21.63    1.10
   5  -1  -2    9.51    1.30
  -5  -1   2    8.76    0.53
  -5   1   2    9.31    0.48
   5   1  -2    9.53    1.71
  -5   1   2    8.59    0.51
  -5  -1   2    9.79    0.81
  -5  -1   2    9.33    0.79
  -5   1   2   10.11    0.82
   5  -1  -2    9.79    0.79
   2   0  -4  659.08   19.68
  -2   0   4  644.44   19.14
  -2   0   4  629.12   18.72
   2   0  -4  657.73   19.81
   2   0  -4  649.88   20.42
   1  -4   3 1553.39   46.58
  -1   4  -3 1521.25   44.81
   1  -4   3 1522.46   44.76
  -1  -4  -3 1516.07   44.68
   1   4   3 1574.40   46.38
  -1  -4  -3 1503.24   44.38
   1  -4   3 1515.43   44.62
  -1  -4  -3 1528.17   44.97
  -1   4  -3 1547.17   48.95
  -4   3  -2  210.16    6.82
  -4  -3  -2  194.37    5.93
  -4   3  -2  201.61    6.13
  -4   3  -2  200.27    8.51
  -4  -3  -2  194.07    6.75
   4  -3   2  207.79    8.13
  -3   3   3  110.67    3.58
  -3  -3   3   99.36    3.20
  -3  -3   3  103.06    3.98
  -3  -3   3  104.14    3.35
  -3   3   3  103.50    3.33
  -3  -3   3   98.95    3.28
   3   3  -3  100.20    3.40
   3  -3  -3   99.74    3.21
  -3   3   3  106.54    3.65
   3  -3  -3  100.29    3.46
   3   3  -3  102.32    3.81
   0   2  -4   67.16    2.84
   0   2   4   66.91    2.23
   0   2   4   67.37    2.22
   0   2  -4   71.27    2.39
   0  -2  -4   61.79    2.14
   0   2   4   69.78    2.34
   0  -2   4   70.45    2.37
   0  -2  -4   65.42    2.31
   0   2  -4   69.29    2.31
   0  -2   4   65.63    3.16
   0  -2   4   67.97    2.23
   0   2  -4   64.98    2.26
  -4  -4  -1  218.44    6.66
  -4   4  -1  214.90    7.79
  -4  -4  -1  214.04    6.52
  -4   4  -1  205.34    8.11
   4  -4   1  189.34    9.82
   4  -4   1  212.43    6.45
  -4   4  -1  205.36    6.25
   4  -4   1  205.65    9.20
  -4  -4  -1  209.04    6.45
  -4  -4  -1  207.10    7.30
   0  -6   0  648.29   19.44
   0   6   0  653.58   19.38
   0  -6   0  633.72   19.15
   0  -6   0  616.12   18.69
   0   6   0  651.57   19.43
   0   6   0  629.74   18.73
   0   6   0  653.88   19.47
  -2  -1   4  248.74    7.56
  -2  -1   4  268.59    8.16
   2  -1  -4  270.44    9.13
   2   1  -4  258.04    8.67
   2  -1  -4  264.84    8.34
   2   1  -4  257.05    8.04
  -2   1   4  252.77    7.76
  -2  -1   4  254.72    7.80
   2  -1  -4  253.51    7.80
   2   1  -4  254.26    7.81
  -2   1   4  256.40    7.79
  -5   3   0   49.42    1.90
  -5  -3   0   53.91    1.83
   5  -3   0   51.12    2.21
  -5  -3   0   53.59    3.78
   5  -3   0   50.06    3.65
   5  -3   0   49.73    1.71
  -5   3   0   54.43    1.83
  -5  -3   0   48.71    1.75
   5   3   0   50.90    2.51
  -5   3   0   52.86    2.58
  -5   0  -2 5945.97  137.03
   5   0   2 5559.09  164.42
   5   0   2 5761.51  169.02
   5   0   2 5980.01  142.47
  -5   0  -2 6032.69  140.90
  -5   0  -2 6147.15  146.98
   1  -2  -4   18.43    0.98
  -1  -2   4   17.37    0.74
  -1  -2   4   18.45    1.51
  -1  -2   4   18.50    0.83
   1   2  -4   17.62    1.26
   1   2  -4   17.42    0.89
   1   2  -4   17.56    0.79
  -1   2   4   18.03    0.80
  -1   2   4   18.58    0.80
  -1   2   4   18.41    0.84
  -3  -5   1   21.75    2.41
  -3   5   1   21.25    0.92
   3  -5  -1   22.68    1.50
  -3   5   1   21.12    1.07
  -3  -5   1   21.44    0.90
   3   5  -1   21.30    0.89
  -3   5   1   21.48    0.84
  -3  -5   1   20.63    0.97
  -3  -5   1   22.57    0.92
   3  -5  -1   21.51    0.86
   3  -5  -1   20.98    1.01
  -3  -5   1   22.06    1.02
  -4   0  -3    1.76    0.29
  -4   0  -3    0.71    1.00
   4   0   3    0.04    0.16
  -4   0  -3    0.10    0.86
  -4   0  -3    0.05    0.16
   2  -5  -2  101.24    3.52
   2   5  -2   99.02    3.27
   2  -5  -2   97.48    3.14
  -2   5   2   96.73    3.05
  -2  -5   2   98.23    3.13
  -2  -5   2   95.81    3.14
  -2   5   2   97.27    3.09
   2   5  -2  103.14    3.56
  -2   5   2   91.64    3.31
   2  -5  -2   93.81    3.10
  -2  -5   2  102.76    3.58
  -1  -6   0   93.04    3.11
   1  -6   0   97.37    3.07
   1  -6   0   95.84    3.26
  -1   6   0   97.82    3.18
   1   6   0   95.44    3.41
  -1  -6   0   96.80    3.12
   1  -6   0   99.55    3.81
  -1  -6   0   93.93    3.21
  -1   6   0   97.06    3.21
  -1   6   0   99.49    3.21
   1   6   0   98.29    3.16
  -1  -6   0   99.12    3.13
  -1   6   0  100.08    3.17
   1   6   0   96.31    3.11
  -2   0  -4   30.26    1.20
   2   0   4   29.52    1.13
   2   0   4   29.68    1.08
  -2   0  -4   28.55    1.95
  -2   0  -4   28.24    1.07
  -3  -5  -1  305.68    9.24
  -3   5  -1  301.59    9.27
   3  -5   1  296.47   11.65
  -3   5  -1  321.66    9.81
  -3  -5  -1  308.02    9.30
  -3  -5  -1  306.56    9.26
  -3   5  -1  304.42    9.94
   3  -5   1  307.46    9.22
  -1  -2  -4   45.49    1.76
  -1  -2  -4   46.18    1.64
  -1   2  -4   39.12    1.98
   1  -2   4   45.23    2.55
  -1   2  -4   46.91    1.64
  -1   2  -4   48.89    1.77
   1  -2   4   44.23    1.57
  -1   2  -4   46.79    1.64
   1   2   4   44.93    1.58
  -1   2  -4   47.48    2.25
   1   2   4   46.23    1.61
   1  -2   4   49.30    1.67
   1   2   4   46.69    1.59
  -5   1  -2  276.08    8.30
  -5   1  -2  291.10   11.47
  -5  -1  -2  300.90   10.98
   5   1   2  292.33    8.85
   5  -1   2  284.49    9.69
  -5  -1  -2  283.30    9.66
  -5   1  -2  283.90    9.29
  -5  -1  -2  292.88    8.81
   5  -1   2  256.43    8.98
   5  -1   2  271.47    8.19
  -2   4   3  281.76    8.70
  -2  -4   3  280.63    8.56
  -2   4   3  274.92    8.30
  -2  -4   3  273.59    8.84
   2  -4  -3  274.72    8.33
   2  -4  -3  277.31    8.56
   2   4  -3  272.01    8.47
   2   4  -3  279.28    8.68
   2   4  -3  279.56    8.69
  -2  -4   3  283.41    8.55
  -2   4   3  278.31    8.46
   5  -3  -1   59.24    3.36
   5  -3  -1   64.62    2.19
  -5   3   1   62.85    2.55
   5   3  -1   65.36    3.45
   5  -3  -1   61.79    2.43
  -5  -3   1   62.02    3.41
  -5   3   1   64.58    2.26
  -5  -3   1   63.17    2.17
   4   1   3    4.78    0.33
  -4  -1  -3    5.17    0.40
  -4   1  -3    5.10    0.94
   4  -1   3    4.97    0.84
  -4  -1  -3    4.45    1.07
  -4   1  -3    4.99    0.34
  -4  -1  -3    5.10    0.34
   4  -1   3    4.80    0.34
  -4   1  -3    4.81    0.39
  -4  -1  -3    3.70    0.94
  -3  -3  -3  144.82    4.52
  -3  -3  -3  133.27    4.18
  -3   3  -3  126.50    3.99
  -3   3  -3  144.18    4.93
   3  -3   3  149.65    5.63
  -3  -3  -3  144.87    4.47
  -3   3  -3  155.08    7.24
  -3   3  -3  143.10    4.43
   3  -3   3  146.16    5.40
  -2  -5  -2   13.44    0.59
   2  -5   2   13.39    2.14
   2   5   2   13.23    0.64
   2  -5   2   13.61    0.60
  -2   5  -2   12.10    0.57
  -2  -5  -2   12.57    0.65
  -2  -5  -2   13.22    0.67
  -2   5  -2   13.64    0.66
  -2  -5  -2   13.45    0.66
  -2   5  -2   13.02    0.86
   2  -5   2   12.58    0.99
  -2   5  -2   13.14    1.48
  -4  -2   3    7.23    1.02
  -4  -2   3    7.93    0.63
  -4   2   3    7.14    0.54
   4  -2  -3    6.80    0.46
  -4  -2   3    6.98    0.53
  -4   2   3    7.75    0.50
   4   2  -3    8.28    1.21
  -4   2   3    8.01    0.69
   5  -2  -2  690.51   20.78
  -5   2   2  625.06   18.55
  -5  -2   2  620.12   18.87
  -5  -2   2  692.39   21.04
  -5  -2   2  646.76   20.02
   5  -2  -2  592.18   17.64
  -5   2   2  662.15   19.96
   5   2  -2  606.52   20.82
   0  -6   1  239.10    8.63
   0  -6  -1  243.25    7.33
   0  -6   1  249.57    7.53
   0   6   1  243.31    7.37
   0   6   1  249.01    7.54
   0   6  -1  242.60    7.36
   0   6   1  246.68    7.52
   0  -6  -1  245.17    7.64
   0  -6  -1  242.34    7.47
   0   6  -1  252.21    7.75
   0  -6   1  262.81    7.99
   0   6  -1  249.42    7.66
   0  -6   1  251.47    7.88
  -2  -1  -4  150.13    4.66
  -2   1  -4  148.61    4.61
   2  -1   4  151.66    4.66
   2   1   4  154.25    4.74
  -2   1  -4  153.85    4.78
  -2  -1  -4  153.18    4.81
   2   1   4  158.95    4.94
  -2  -1  -4  150.97    5.68
  -2   1  -4  154.74    4.86
   2  -1   4  153.96    5.82
  -2   1  -4  157.68    5.60
  -2  -1  -4  133.07    4.18
  -5   3  -1 1389.02   40.87
  -5  -3  -1 1426.07   43.95
   5  -3   1 1425.19   41.94
  -5   3  -1 1471.87   43.69
   5  -3   1 1428.28   42.99
  -5  -3  -1 1423.17   41.99
   5  -3   1 1457.50   47.35
  -1  -6   1  179.99    5.51
  -1   6   1  178.66    5.47
   1  -6  -1  175.56    5.36
  -1  -6   1  175.70    5.62
  -1   6   1  174.51    5.38
   1  -6  -1  182.16    5.72
  -1  -6   1  177.18    5.48
  -1   6   1  188.10    5.81
   1   6  -1  179.78    5.59
  -1  -6   1  175.41    6.30
   1  -6  -1  177.21    5.77
  -1   6   1  176.92    5.52
   1   6  -1  178.90    5.52
   1   6  -1  178.55    5.52
   1   6  -1  173.77    5.54
  -2  -4  -3  465.86   13.96
  -2   4  -3  448.98   13.39
   2   4   3  390.82   11.70
   2  -4   3  447.61   13.32
   2  -4   3  441.13   13.97
   2  -4   3  484.58   14.49
   2  -4   3  443.60   14.33
  -2   4  -3  448.69   16.39
  -2   4  -3  440.32   13.50
  -2  -4  -3  442.57   13.26
  -2  -2   4  273.70    8.28
   2   2  -4  282.41    8.77
  -2  -2   4  267.49    9.22
   2   2  -4  274.52    8.82
   2  -2  -4  281.10    8.87
  -2   2   4  278.76    8.53
  -2  -2   4  278.08    8.48
   2   2  -4  275.55    8.44
  -2   2   4  271.83    8.25
  -6   0   0   56.27    1.91
  -6   0   0   55.59    2.38
  -6   0   0   52.65    3.22
  -1   6  -1  811.08   24.10
  -1  -6  -1  817.10   24.32
  -1  -6  -1  803.02   23.71
  -1   6  -1  832.51   24.70
  -1   6  -1  816.83   24.41
   1  -6   1  794.96   25.81
   1   6   1  813.17   24.08
   1   6   1  811.96   24.07
  -1   6  -1  810.23   23.96
   1  -6   1  802.56   23.73
   1  -6   1  800.93   24.03
  -1  -6  -1  806.00   23.97
   3   0  -4  261.21    8.33
   3   0  -4  263.11    8.16
  -3   0   4  256.69    7.81
   3   0  -4  269.90    9.27
  -6   1   0    5.05    0.61
  -6  -1   0    4.77    1.88
  -6  -1   0    5.53    0.88
  -6  -1   0    5.74    0.40
   6  -1   0    5.51    0.99
  -6   1   0    5.71    0.38
  -6   1   0    4.89    1.35
   6   1   0    6.13    1.80
  -2   6   0  451.19   13.54
  -2  -6   0  453.20   13.64
  -2  -6   0  451.55   13.45
  -2   6   0  491.84   14.70
  -2  -6   0  448.09   13.48
   2  -6   0  432.39   13.18
   2   6   0  444.69   13.26
   2  -6   0  457.17   14.70
  -2   6   0  455.21   13.78
   2   6   0  472.36   14.08
  -2   6   0  463.15   13.79
  -2  -6   0  455.26   13.65
   2  -6   0  462.04   13.74
  -4   4   2    1.76    0.24
  -4  -4   2    1.65    0.37
   4   4  -2    1.54    0.77
   4   4  -2    1.85    0.28
  -4   4   2    1.53    0.51
  -4  -4   2    1.63    0.27
   4  -4  -2    1.85    0.30
  -4  -4   2    1.82    0.39
  -4  -4   2    1.85    0.44
   5  -2   2    7.34    0.42
  -5   2  -2    8.74    0.45
  -5  -2  -2    9.66    1.45
  -5  -2  -2   10.43    1.19
   5   2   2    8.73    0.53
   5  -2   2    9.21    1.21
  -5  -2  -2    9.05    0.47
  -5   2  -2    8.66    0.85
   5  -2   2    8.06    1.53
  -6   0   1   -0.16    0.24
  -6   0   1    0.63    0.32
   6   0  -1    0.63    1.78
  -6   0   1   -0.56    0.70
  -4   2  -3  363.40   10.87
  -4  -2  -3  361.94   10.82
   4  -2   3  364.63   10.89
   4   2   3  355.15   10.67
  -4  -2  -3  338.50   10.96
  -4   2  -3  352.07   12.90
  -4   2  -3  364.35   11.55
  -4  -2  -3  358.36   11.74
   4  -2   3  353.25   11.50
  -4   2  -3  365.33   11.02
  -4  -2  -3  366.97   11.04
   0   3  -4  138.19    4.33
   0   3   4  135.66    4.23
   0  -3   4  143.23    4.50
   0  -3   4  133.03    5.16
   0   3  -4  136.16    4.69
   0  -3  -4  131.64    4.17
   0   3   4  137.03    4.32
   0   3  -4  138.10    5.05
   0   3  -4  135.89    4.34
   0  -3  -4  130.23    4.25
   0   3  -4  126.06    4.05
   0   3   4  136.66    4.27
  -3   1   4  111.46    3.67
  -3  -1   4  110.76    3.62
  -3  -1   4  100.82    3.25
   3   1  -4  112.98    4.25
   3   1  -4  114.41    3.80
  -3  -1   4  109.88    3.51
  -3   1   4  109.32    3.51
   3  -1  -4  106.95    3.81
   3  -1  -4  117.78    4.60
   3   1  -4  115.87    4.02
   3  -1  -4  112.63    3.76
   2  -2   4  244.41    7.38
  -2  -2  -4  246.36    7.51
  -2  -2  -4  242.54    8.28
  -2   2  -4  228.19    7.92
   2  -2   4  233.16    8.29
  -2  -2  -4  248.50    7.57
  -2  -2  -4  248.57    7.61
   2   2   4  237.04    7.15
  -2   2  -4  241.13    7.32
   2   2   4  262.73    7.99
   2  -2   4  247.03    7.52
  -2   2  -4  253.06    7.75
   1  -3  -4   59.35    2.10
   1   3  -4   58.97    2.02
  -1   3   4   53.51    1.87
  -1   3   4   59.83    2.07
   1  -3  -4   61.55    2.35
   1   3  -4   56.18    2.28
   1   3  -4   58.21    2.02
  -1  -3   4   59.72    2.06
  -1   3   4   58.55    1.99
  -1  -3   4   58.70    2.90
  -6  -1   1    5.18    1.12
   6  -1  -1    4.80    0.40
   6  -1  -1    3.50    0.87
   6   1  -1    4.59    1.88
  -6   1   1    4.25    0.35
  -6  -1   1    4.35    0.61
  -6  -1   1    5.43    0.42
  -6   1   1    4.57    0.45
  -6   1   1    5.17    1.01
  -6   0  -1    0.28    0.21
   6   0   1   -0.10    0.24
  -6   0  -1    0.39    0.72
  -6   0  -1    2.51    1.90
   3   5  -2  145.84    4.93
  -3  -5   2  152.82    4.87
   3  -5  -2  154.90    4.91
  -3  -5   2  159.99    5.22
   3  -5  -2  161.07    5.01
  -3   5   2  159.99    4.91
  -3  -5   2  160.50    4.97
   3   5  -2  157.43    4.93
  -3   5   2  154.06    4.76
   3  -5  -2  158.56    5.34
  -2   6   1  447.81   13.33
  -2   6   1  436.17   10.40
   2   6  -1  427.81   10.26
   2   6  -1  436.50   13.49
   2  -6  -1  440.79   11.10
  -2  -6   1  447.70   13.43
  -2  -6   1  442.30   13.19
  -2   6   1  446.64   10.75
  -2  -6   1  444.09   13.46
  -2  -6   1  442.26   11.04
   2  -6  -1  435.89   10.34
   2   6  -1  437.81   10.45
  -4   4  -2  115.07    3.35
   4  -4   2  111.62    2.85
  -4   4  -2  110.66    4.89
  -4  -4  -2  118.85    3.08
  -4  -4  -2  110.71    2.87
   4  -4   2  111.44    5.07
  -4  -4  -2  114.30    3.74
  -4   4  -2  113.99    2.91
  -1   3  -4  186.55    5.93
   1  -3   4  184.74    4.54
   1  -3   4  199.52    6.21
  -1   3  -4  201.72    5.09
  -1  -3  -4  203.08    5.14
  -1  -3  -4  201.37    5.02
  -1   3  -4  209.28    5.16
   1   3   4  211.96    5.21
   1  -3   4  187.63    4.67
   1   3   4  199.98    4.95
  -1   3  -4  201.85    4.99
  -1   3  -4  192.66    5.35
  -4   5   0   73.24    2.14
  -4  -5   0   73.67    3.30
  -4  -5   0   69.29    1.97
   4  -5   0   74.08    1.99
   4  -5   0   72.82    2.38
  -4  -5   0   70.70    2.36
  -4  -5   0   72.66    2.06
   4  -5   0   76.50    3.94
  -4   5   0   76.27    2.60
  -4  -5   0   76.63    2.10
  -3  -4   3    0.14    0.16
  -3   4   3    0.07    0.17
   3   4  -3   -0.06    0.35
   3  -4  -3    0.11    0.28
   3   4  -3    0.15    0.31
  -3  -4   3   -0.21    0.47
   3  -4  -3    0.50    0.49
  -3  -4   3    0.11    0.22
  -3  -4   3    0.19    0.30
   3   4  -3    0.09    0.88
  -3   4   3    0.23    0.31
  -2   6  -1  103.19    2.70
  -2  -6  -1  102.76    2.66
   2   6   1  103.91    2.71
  -2  -6  -1  101.08    2.73
  -2  -6  -1   95.42    2.56
  -2   6  -1  101.74    2.83
  -2  -6  -1  104.72    2.82
  -2   6  -1  100.41    3.05
   2  -6   1  102.60    2.64
   2  -6   1  100.06    3.49
   2  -6   1  100.00    4.84
  -2   6  -1   97.19    2.61
   4  -3  -3    2.45    0.64
  -4  -3   3    2.21    0.70
   4   3  -3    2.10    0.33
  -4   3   3    2.34    0.27
   4  -3  -3    2.80    0.36
  -4   3   3    2.25    0.47
  -4   3   3    1.81    0.36
   4   3  -3    2.31    0.94
  -4  -3   3    1.95    0.31
   0   5  -3  464.91   11.18
   0   5   3  421.53   10.05
   0   5   3  454.46   10.75
   0   5  -3  466.37   14.12
   0  -5   3  434.96   10.37
   0   5  -3  465.11   11.07
   0  -5   3  447.91   10.62
   0  -5   3  458.10   11.57
   0   5  -3  459.30   11.23
   0   5   3  495.21   11.79
   0  -5  -3  468.94   11.26
  -6   1  -1 1233.41   29.45
  -6  -1  -1 1199.01   27.90
  -6   1  -1 1189.28   31.14
  -6  -1  -1 1239.77   33.20
   6  -1   1 1278.37   33.43
  -6  -1  -1 1225.93   29.93
   6  -1   1 1218.15   30.08
  -6   1  -1 1258.01   29.26
   6   1   1 1048.35   26.17
   6   1   1 1231.79   28.81
   6  -1   1 1132.50   26.48
  -5  -3   2  185.03    4.94
   5   3  -2  188.31    7.54
   5  -3  -2  179.15    5.53
  -5   3   2  186.16    4.91
   5  -3  -2  180.65    4.57
  -5  -3   2  184.60    5.15
   5  -3  -2  186.32    4.90
  -5   3   2  184.06    4.58
  -5  -3   2  185.23    5.02
  -5   3   2  179.75    4.47
  -3   0  -4  926.53   21.78
  -3   0  -4  912.33   21.39
  -3   0  -4  934.43   23.49
   3   0   4  886.94   20.70
   6   2   0 1486.00   33.52
  -6   2   0 1529.29   33.55
  -6   2   0 1521.67   31.73
   6  -2   0 1433.43   34.73
  -6   2   0 1452.23   33.74
  -6  -2   0 1415.55   36.32
   6  -2   0 1441.53   38.19
  -6  -2   0 1476.12   32.14
   6  -2   0 1510.56   31.22
  -6  -2   0 1485.97   30.65
  -5   4   0   84.73    2.46
  -5  -4   0   92.52    4.81
  -5  -4   0   85.25    2.30
   5  -4   0   82.08    2.19
   5  -4   0   83.29    4.44
   5  -4   0   88.25    2.85
  -5  -4   0   77.91    2.18
   5   0  -3    0.02    0.22
  -5   0   3   -0.03    0.32
  -5   0   3    0.07    0.40
   5   0  -3   -0.25    0.57
  -3   5  -2   99.56    2.65
  -3  -5  -2   98.86    2.60
   3  -5   2  104.25    5.01
  -3  -5  -2   94.04    2.49
  -3   5  -2  101.59    2.64
   3  -5   2   98.72    2.54
  -3  -5  -2   98.27    2.65
  -3   5  -2   94.49    3.86
  -3   5  -2   95.76    2.82
  -3  -5  -2   97.13    2.59
   3  -5   2   94.32    3.06
  -3  -5  -2  101.08    2.69
   1   5  -3  875.83   20.75
  -1   5   3  846.69   19.75
  -1  -5   3  857.01   20.72
   1  -5  -3  862.86   20.42
  -1  -5   3  845.89   19.76
   1   5  -3  848.91   19.88
  -1   5   3  870.31   20.49
  -1  -5   3  873.31   20.50
   1   5  -3  851.52   20.13
   1   5  -3  879.69   20.66
   4  -5  -1  274.88    6.96
  -4   5   1  273.00    6.71
   4  -5  -1  257.97    6.28
  -4   5   1  272.37    6.56
  -4  -5   1  268.55    6.82
  -4  -5   1  280.71    6.80
  -4  -5   1  261.09    6.40
   4  -5  -1  272.99    7.90
  -4  -5   1  257.24    9.37
   4   5  -1  264.23    6.38
  -4  -5   1  261.08    6.51
   0  -6   2  738.45   17.35
   0  -6  -2  768.37   18.09
   0  -6  -2  766.75   18.16
   0   6   2  785.19   18.42
   0  -6   2  774.44   18.66
   0   6  -2  767.17   18.18
   0   6   2  786.32   18.39
   0   6  -2  801.86   18.94
   0  -6  -2  747.57   17.53
   0  -6   2  786.88   18.39
   0   6   2  771.40   18.10
   0  -6   2  729.64   20.02
   0   6  -2  761.17   18.22
   0   6  -2  661.46   15.56
  -3   1  -4   55.46    1.58
  -3  -1  -4   55.22    1.60
   3  -1   4   54.79    2.56
  -3   1  -4   54.77    2.52
  -3  -1  -4   53.62    2.21
  -3   1  -4   54.89    1.63
  -3   1  -4   56.94    2.57
   3  -1   4   54.08    1.51
   3   1   4   54.87    1.53
  -3  -1  -4   55.14    1.56
  -3  -1  -4   55.40    1.65
  -3  -1  -4   55.40    2.62
  -3   2   4    1.30    0.27
  -3   2   4    1.52    0.34
  -3  -2   4    0.87    0.22
  -3  -2   4    0.78    0.28
   3   2  -4    0.83    0.40
   3  -2  -4    1.05    0.44
   3  -2  -4    1.02    0.24
   3   2  -4    0.69    0.37
  -3   2   4    0.83    0.27
   3   2  -4    0.38    0.44
  -3  -2   4    1.23    0.73
  -2  -3   4  351.23    9.73
  -2   3   4  349.75    8.51
   2  -3  -4  351.90    8.43
   2  -3  -4  333.66    8.55
   2  -3  -4  341.50    8.39
   2   3  -4  342.80    8.35
   2   3  -4  352.11    8.88
  -2   3   4  346.54    8.41
  -2  -3   4  351.34    8.50
  -2   3   4  346.39    8.34
  -5  -1   3  354.84    8.90
   5  -1  -3  353.28    9.44
  -5   1   3  350.57    8.61
   5  -1  -3  338.06    8.28
  -5  -1   3  343.61    8.44
   5   1  -3  342.68    9.57
  -1  -5  -3  124.96    3.28
  -1   5  -3  120.69    3.11
   1   5   3  123.78    3.19
   1  -5   3  119.80    3.11
  -1  -5  -3  124.68    3.44
  -1   5  -3  120.29    5.35
   1  -5   3  129.66    4.22
  -1   5  -3  120.41    3.19
  -1  -5  -3  117.73    3.02
   1  -5   3  115.43    3.65
   1  -5   3  122.31    3.10
   6   2  -1   30.30    2.85
  -6  -2   1   29.52    1.06
  -6  -2   1   28.94    1.79
  -6   2   1   28.14    0.94
  -6  -2   1   30.06    2.15
   6  -2  -1   29.72    1.05
  -6   2   1   31.72    1.65
  -6   2   1   29.52    1.12
  -6  -2   1   29.35    0.97
   6  -2  -1   30.07    1.55
   5   4  -1    9.57    1.02
   5  -4  -1    8.16    0.70
  -5  -4   1    8.92    0.79
  -5   4   1    7.52    0.73
  -5   4   1   10.52    0.61
   5  -4  -1    7.91    1.43
  -5  -4   1    7.39    0.71
  -5  -4   1    7.87    1.55
  -5   4   1    6.84    0.38
   5  -4  -1    9.21    0.49
   1  -6  -2  818.33   19.50
   1   6  -2  852.12   20.00
  -1  -6   2  860.11   20.23
   1   6  -2  844.23   19.86
   1  -6  -2  767.62   17.98
  -1   6   2  827.83   19.36
  -1  -6   2  844.22   20.23
   1   6  -2  830.65   19.61
  -1   6   2  832.87   19.55
  -1   6   2  826.14   19.31
   1   6  -2  805.19   19.09
  -1  -6   2  896.13   22.51
  -1  -6   2  829.50   19.39
  -3   4  -3  102.23    5.35
  -3  -4  -3  103.19    2.85
  -3   4  -3  100.94    3.08
   3  -4   3  103.13    3.63
  -3  -4  -3  101.12    2.62
  -3   4  -3   99.54    2.60
   3  -4   3  104.62    3.89
  -3  -4  -3   99.31    2.64
  -4   5  -1  195.25    5.82
   4  -5   1  185.70    7.75
  -4  -5  -1  184.30    5.46
  -4  -5  -1  196.66    4.88
   4  -5   1  205.65    5.02
  -4   5  -1  196.69    5.11
  -4  -5  -1  201.92    5.00
   1  -6   2  410.79   10.28
  -1  -6  -2  415.64    9.95
   1  -6   2  431.15   13.73
   1   6   2  420.38   10.02
  -1  -6  -2  418.31   10.07
  -1  -6  -2  421.80   10.00
  -1   6  -2  397.75   10.14
   1   6   2  398.42    9.57
   1  -6   2  419.33    9.93
  -1   6  -2  422.35   10.15
  -5   3  -2   46.94    1.80
  -5  -3  -2   45.32    1.33
   5  -3   2   47.76    3.14
  -5  -3  -2   39.71    2.30
   5  -3   2   44.83    2.23
  -5   3  -2   47.16    1.36
  -6   0   2    0.08    0.25
   6   0  -2    0.80    1.34
  -6   0   2    0.50    0.48
  -4   3  -3  612.68   14.40
  -4  -3  -3  625.29   14.76
   4   3   3  598.44   14.20
  -4   3  -3  619.32   18.66
   4  -3   3  600.49   15.59
  -4  -3  -3  601.96   15.05
  -4   3  -3  603.36   14.26
  -4  -3  -3  642.31   15.16
  -4   3  -3  603.49   14.82
   4  -3   3  526.62   12.40
  -4  -3  -3  604.73   14.20
  -3  -6   0  121.36    3.30
  -3  -6   0  125.32    3.27
  -3   6   0  124.18    3.52
  -3  -6   0  127.32    3.25
   3  -6   0  126.98    4.83
  -3  -6   0  124.49    3.30
   3  -6   0  130.78    3.30
   3   6   0  127.54    3.23
  -3   6   0  125.57    3.33
  -3   6   0  121.72    3.09
  -5  -4  -1   51.38    1.49
   5  -4   1   48.66    1.40
  -5   4  -1   48.21    1.38
  -5   4  -1   45.44    2.45
   5  -4   1   48.79    3.82
  -5  -4  -1   46.17    2.64
  -5   4  -1   48.22    1.69
   5  -4   1   48.79    2.05
  -5  -4  -1   50.36    1.54
   6  -2   1  126.76    5.70
  -6   2  -1  122.26    3.60
   6   2   1  118.60    4.08
  -6  -2  -1  121.62    5.72
  -6   2  -1  137.41    5.57
  -6  -2  -1  113.99    4.06
  -6   2  -1  127.82    3.24
   6  -2   1  121.52    4.28
  -6  -2  -1  123.68    3.18
  -2   3  -4   11.57    0.53
  -2   3  -4   12.04    0.60
   2   3   4   12.85    0.60
  -2   3  -4   11.35    1.64
  -2  -3  -4   12.09    0.60
   2  -3   4   11.62    1.31
   2  -3   4   12.17    0.57
  -2  -3  -4   11.90    0.59
   2  -3   4   12.42    0.52
   2  -5  -3  483.78   11.53
   2   5  -3  489.85   11.91
  -2   5   3  492.11   11.92
  -2  -5   3  503.35   12.01
   2  -5  -3  485.21   11.76
  -2  -5   3  482.41   11.41
  -2   5   3  496.95   11.74
   2  -5  -3  434.51   10.40
  -2  -5   3  472.41   11.82
   2   5  -3  493.06   11.88
  -6   1   2  312.28    7.51
   6  -1  -2  321.12    8.70
   6  -1  -2  329.09    9.99
  -6  -1   2  358.67    9.25
  -6   1   2  320.32    8.18
   6   1  -2  331.78   10.95
  -6  -1   2  332.84    8.08
  -6   1   2  325.88    7.90
  -5   0  -3   -0.01    0.15
  -5   0  -3    0.21    1.34
   5   0   3   -0.05    0.14
  -5   0  -3   -0.14    0.83
   3   2   4  195.28    4.78
  -3   2  -4  189.35    5.53
  -3  -2  -4  190.97    4.70
  -3   2  -4  192.51    4.74
  -3   2  -4  200.13    6.58
   3  -2   4  190.32    4.67
  -3  -2  -4  192.57    5.87
   3  -2   4  194.83    6.16
  -3  -2  -4  204.10    5.10
  -3   2  -4  194.63    4.88
  -3  -2  -4  194.73    4.84
   4   0  -4  527.28   12.90
   4   0  -4  556.22   14.53
  -4   0   4  523.65   12.72
   5   2  -3  218.38    7.00
  -5   2   3  226.00    5.73
  -5   2   3  221.85    5.51
  -5   2   3  211.42    5.68
  -5  -2   3  219.95    5.74
   5  -2  -3  213.84    5.41
   5   2  -3  209.65    5.39
  -5  -2   3  221.59    5.62
   3  -6  -1  232.23    6.58
  -3  -6   1  226.32    5.74
  -3   6   1  229.85    5.67
   3   6  -1  232.14    5.67
  -3  -6   1  231.51    5.80
  -3  -6   1  237.39    7.70
  -3  -6   1  231.05    5.64
  -3   6   1  229.11    5.56
  -3   6   1  233.57    5.91
  -3  -6   1  229.01    5.74
   3  -6  -1  227.61    5.54
   3  -6  -1  218.33    5.59
   0   4   4  295.61    7.16
   0   4   4  324.92    7.86
   0  -4   4  305.34    7.40
   0  -4   4  301.01    8.54
   0   4   4  314.43    7.59
   0   4  -4  320.97    7.77
   0   4  -4  321.42    7.75
   0   4  -4  311.36    7.93
   0  -4  -4  315.44    7.90
   0  -4  -4  317.03    7.73
   0   4  -4  329.70    9.73
   2   6  -2  239.15    6.20
   2   6  -2  245.33    6.08
   2  -6  -2  207.34    5.24
  -2   6   2  227.06    6.03
  -2  -6   2  235.46    5.82
  -2   6   2  234.57    5.70
   2  -6  -2  236.63    6.18
  -2  -6   2  230.13    5.60
  -2   6   2  237.83    5.76
   2  -6  -2  234.87    5.75
  -2  -6   2  246.57    6.39
  -2   6   2  237.32    5.88
   2   6  -2  233.96    5.80
  -5   1  -3  161.72    4.13
  -5   1  -3  151.64    4.75
  -5  -1  -3  143.31    4.86
  -5   1  -3  137.52    5.91
   5  -1   3  129.50    4.52
   5  -1   3  150.22    4.71
   5   1   3  142.56    3.60
  -5   1  -3  146.44    3.66
  -5  -1  -3  138.46    5.03
   5  -1   3  147.51    3.68
  -5  -1  -3  143.65    3.59
  -2   5  -3   78.08    2.19
   2  -5   3   76.80    2.04
  -2  -5  -3   76.53    2.17
  -2  -5  -3   77.07    2.08
  -2   5  -3   73.30    2.35
  -2  -5  -3   75.44    2.11
   2  -5   3   78.05    3.15
   2  -5   3   76.72    2.75
   2   5   3   82.04    2.20
  -2   5  -3   75.62    4.05
  -2   5  -3   76.64    2.08
  -3   6  -1   25.05    0.84
  -3  -6  -1   24.09    0.83
  -3  -6  -1   26.70    0.96
  -3   6  -1   28.40    1.44
  -3  -6  -1   27.15    1.17
  -3   6  -1   27.10    0.95
   3  -6   1   24.11    2.63
  -3  -6  -1   25.87    0.98
  -3   6  -1   26.58    1.06
   3  -6   1   27.44    0.88
   6  -3   0   18.37    0.73
  -6   3   0   20.22    0.74
  -6   3   0   20.70    1.53
  -6  -3   0   20.62    2.48
   6  -3   0   17.63    2.65
   6  -3   0   18.62    1.23
  -6   3   0   18.86    0.93
  -6  -3   0   19.95    0.74
   6   3   0   17.52    1.42
  -6  -3   0   19.78    0.80
  -4   1   4  219.94    5.47
   4  -1  -4  224.74    5.89
   4   1  -4  230.03    6.05
   4   1  -4  233.72    6.37
   4  -1  -4  238.48    5.81
  -4  -1   4  229.48    5.68
  -4  -1   4  231.04    5.85
  -4   1   4  234.11    5.96
   4  -1  -4  242.01    7.05
   4   1  -4  213.68    5.82
  -1   4   4    9.25    0.51
   1   4  -4    9.33    1.05
   1  -4  -4    9.28    0.74
  -1   4   4    8.52    0.50
   1  -4  -4    8.19    0.57
   1   4  -4    8.98    0.49
  -1  -4   4    8.78    0.46
  -1  -4   4    8.38    0.49
   1   4  -4    8.78    0.50
  -1   4   4    8.78    0.47
  -1  -4   4    8.44    1.03
   1   4  -4    8.89    0.73
   1  -4  -4    8.57    0.48
  -6   0  -2 1429.93   33.20
  -6   0  -2 1457.48   38.70
   6   0   2 1375.42   33.70
  -6   0  -2 1454.57   35.12
   6   0   2 1439.48   33.52
   2  -6   2   79.95    4.39
  -2   6  -2   76.39    2.30
  -2   6  -2   81.80    2.26
  -2  -6  -2   80.44    2.21
   2  -6   2   80.84    2.65
   2  -6   2   81.39    2.14
  -2  -6  -2   77.11    2.04
  -2   6  -2   80.47    3.01
  -2  -6  -2   80.01    2.23
   2   6   2   84.19    2.25
   0  -7   0    0.23    0.51
   0   7   0    0.01    0.18
   0  -7   0    0.28    0.15
   0   7   0    0.17    0.17
   0  -7   0    0.39    0.34
   0   7   0    0.17    0.21
  -3   3   4  193.60    4.84
  -3  -3   4  194.75    4.93
  -3   3   4  199.82    5.02
  -3  -3   4  198.17    6.16
   3   3  -4  192.68    5.18
  -3  -3   4  192.76    4.78
  -3  -3   4  190.99    4.76
   3   3  -4  194.08    5.12
  -3   3   4  201.35    5.17
   3  -3  -4  198.75    4.90
  -4  -5   2  502.73   12.22
  -4  -5   2  470.98   11.39
  -4   5   2  480.60   11.40
  -4  -5   2  503.98   12.27
  -4   5   2  506.56   11.96
   4  -5  -2  490.89   11.73
  -4  -5   2  498.46   11.85
   4  -5  -2  464.66   11.24
   4  -5  -2  468.06   11.95
   4   5  -2  484.37   11.50
   1  -4   4    0.74    0.23
  -1   4  -4    1.03    1.21
   1  -4   4    0.50    0.81
  -1   4  -4    0.83    0.23
   1   4   4    0.92    0.21
  -1   4  -4    0.41    0.52
  -1  -4  -4    0.76    0.28
  -1  -4  -4    0.46    0.25
   6   3  -1    8.45    1.35
  -6  -3   1    8.32    0.50
  -6   3   1    8.19    0.59
  -6  -3   1    9.11    1.37
  -6  -3   1    8.65    0.50
   6  -3  -1    8.73    0.50
   6  -3  -1    8.58    0.79
   6  -3  -1    9.23    1.83
  -6   3   1    9.03    0.92
   6  -1   2  172.78    5.53
   6   1   2  209.56    5.22
   6  -1   2  194.07    4.79
  -6  -1  -2  198.82    4.91
  -6   1  -2  197.75    4.84
  -6   1  -2  188.26    5.51
  -6   1  -2  200.36    7.85
  -6  -1  -2  201.53    6.20
  -6  -1  -2  185.82    7.41
   6  -1   2  182.30    6.02
  -6  -2   2    5.61    0.78
  -6   2   2    4.83    0.68
  -6  -2   2    3.99    0.60
  -6   2   2    4.64    0.36
   6  -2  -2    4.08    0.57
   6   2  -2   10.16    2.12
  -6  -2   2    4.10    0.36
   6  -2  -2    4.24    0.36
   0   0   5   -0.12    0.14
   0   0  -5    0.08    0.27
   0   0   5   -0.03    0.20
   0   0  -5   -0.33    0.83
   4  -4  -3  394.36    9.56
   4   4  -3  404.26    9.76
  -4  -4   3  386.22    9.27
   4  -4  -3  407.70   10.30
  -4   4   3  412.61    9.96
  -4  -4   3  384.58    9.81
  -4   4   3  387.32    9.24
  -4  -4   3  409.29    9.80
   4   4  -3  404.23   12.89
  -4  -4   3  390.13    9.49
  -4   4   3  410.40   10.28
   4   4  -3  376.20    9.57
   5  -4  -2  175.60    5.47
  -5  -4   2  173.03    4.63
   5  -4  -2  169.11    4.29
  -5  -4   2  177.08    5.03
  -5   4   2  166.16    4.17
   5  -4  -2  165.39    4.40
   5   4  -2  171.85    4.25
  -5  -4   2  172.79    4.65
   5   4  -2  169.93    5.93
  -5   4   2  171.56    4.54
  -5   4   2  164.66    4.10
   1   7   0    0.16    0.31
  -1  -7   0   -0.16    0.17
  -1  -7   0    0.22    0.34
  -1   7   0    0.02    0.15
   1  -7   0   -0.07    0.32
   1  -7   0   -0.38    0.64
   1  -7   0   -0.09    0.14
   1   7   0    0.04    0.18
  -1  -7   0   -0.19    0.38
  -1   7   0    0.06    0.18
  -1   7   0    0.23    0.28
  -1   7   0   -0.03    0.24
   1   7   0   -0.08    0.15
  -1   0   5   -0.09    0.15
   1   0  -5    0.08    0.27
   1   0  -5    0.21    0.29
  -1   0   5   -0.08    0.18
  -1   0   5    0.03    0.22
   0  -1  -5   96.26    3.64
   0   1  -5   94.14    2.56
   0  -1  -5   98.79    2.75
   0  -1  -5   99.07    2.44
   0   1  -5  103.10    3.54
   0   1  -5   97.40    2.63
   0   1   5   98.47    2.57
   0  -1   5  100.46    2.61
   0   1  -5  100.41    2.77
   0   1   5  105.37    2.80
   0   1   5   99.19    2.61
  -6   3  -1   58.51    1.50
  -6  -3  -1   57.87    1.56
   6  -3   1   53.40    1.41
   6  -3   1   55.22    2.38
  -6   3  -1   51.04    2.79
   6  -3   1   57.75    3.97
  -6   3  -1   56.22    1.84
  -6  -3  -1   56.31    3.56
  -5  -2  -3    7.40    1.18
   5  -2   3   10.31    1.15
  -5  -2  -3   10.88    1.17
  -5   2  -3   10.89    0.99
   5   2   3   11.13    0.52
  -5  -2  -3   11.17    0.46
  -5   2  -3   11.42    0.49
  -5   2  -3   12.08    0.58
   5  -2   3   10.89    0.47
   0  -7  -1   54.35    1.60
   0  -7   1   49.36    2.59
   0   7   1   54.40    1.49
   0  -7  -1   52.70    1.68
   0  -7   1   52.52    1.70
   0   7  -1   52.52    1.41
   0   7   1   53.97    1.43
   0   7  -1   53.95    1.53
   0  -7  -1   51.65    1.33
   0   7  -1   53.79    1.56
   0   7   1   51.41    1.39
   0  -7   1   51.52    1.36
   1  -1  -5    5.01    0.97
   1   1  -5    5.21    0.91
   1   1  -5    6.24    0.44
  -1   1   5    5.94    0.38
  -1  -1   5    5.75    0.38
   1   1  -5    5.61    0.49
  -1   1   5    6.17    0.43
  -1  -1   5    5.69    0.36
   1  -1  -5    5.82    0.45
  -1   1   5    5.67    0.36
   1  -1  -5    5.82    0.50
   2  -4  -4  397.83    8.46
   2   4  -4  370.40    8.24
   2  -4  -4  402.06    8.77
  -2   4   4  400.37    8.66
   2   4  -4  423.84    9.39
  -2  -4   4  393.62    8.48
   2   4  -4  412.31    8.91
  -2   4   4  397.44    8.49
  -2  -4   4  404.69    8.62
  -2  -4   4  408.21    9.86
  -2   4   4  402.37    8.60
  -4   0  -4  533.78   11.26
  -4   0  -4  562.91   11.77
   4   0   4  558.11   11.67
  -4   0  -4  558.21   13.19
  -4  -2   4  141.12    3.30
   4  -2  -4  140.78    3.23
   4   2  -4  149.08    3.82
   4   2  -4  139.54    3.74
  -4   2   4  140.60    3.32
  -4   2   4  145.63    3.42
  -4  -2   4  141.01    3.41
  -4   2   4  148.40    3.67
   4   2  -4  132.52    3.59
   4  -2  -4  142.96    3.69
  -4   5  -2    0.06    0.19
  -4   5  -2   -0.71    1.04
   4  -5   2   -0.02    0.17
  -4   5  -2   -0.16    0.38
  -4  -5  -2    0.15    0.25
   4  -5   2   -0.22    1.63
  -4   5  -2    0.27    0.25
  -4  -5  -2    0.09    0.16
  -4  -5  -2    0.06    0.19
   1   0   5   -0.29    0.23
  -1   0  -5   -0.20    0.26
   1   0   5   -0.01    0.17
  -1   0  -5   -0.10    0.79
  -1   0  -5   -0.06    0.25
  -1   0  -5    0.14    0.18
   3   5  -3  233.00    5.26
  -3  -5   3  227.69    5.56
   3  -5  -3  218.37    4.89
   3   5  -3  235.86    5.68
  -3   5   3  247.42    5.83
  -3  -5   3  241.45    5.39
   3  -5  -3  230.31    5.46
  -3   5   3  239.52    5.20
   3  -5  -3  241.08    5.38
  -3  -5   3  235.55    5.16
   1  -7  -1    2.68    0.51
  -1   7   1    3.08    0.28
  -1  -7   1    2.95    0.80
  -1  -7   1    2.97    0.26
   1  -7  -1    2.96    0.24
   1  -7  -1    2.09    0.41
   1   7  -1    2.76    0.36
  -1  -7   1    2.97    0.28
  -1  -7   1    3.19    0.47
  -1   7   1    3.03    0.26
   1   7  -1    3.09    0.31
   1   7  -1    3.16    0.28
  -1   7   1    2.62    0.35
  -1   7   1    3.02    0.34
   1   7  -1    2.90    0.38
  -3  -3  -4    7.77    0.48
  -3  -3  -4    7.58    0.40
  -3   3  -4    7.39    0.83
   3  -3   4    7.55    0.39
  -3   3  -4    7.85    0.42
   3  -3   4    6.62    1.14
  -3  -3  -4    7.15    0.56
  -3   3  -4    7.81    1.86
  -3   3  -4    6.70    0.43
  -4   1  -4    1.15    0.24
  -4  -1  -4    0.95    0.90
  -4   1  -4    1.30    0.79
   4  -1   4    1.22    0.84
   4   1   4    1.00    0.19
  -4  -1  -4    0.84    0.23
   4  -1   4    1.17    0.22
  -4  -1  -4    0.29    0.79
  -4   1  -4    2.10    1.29
  -4  -1  -4    1.18    0.20
  -4   1  -4    1.32    0.24
   1  -7   1   17.10    0.93
  -1   7  -1   15.38    0.60
   1   7   1   15.48    0.64
   1   7   1   16.03    0.64
  -1  -7  -1   15.83    0.57
  -1   7  -1   16.58    0.69
  -1  -7  -1   15.96    0.92
  -1   7  -1   15.78    0.74
  -1   7  -1   15.88    0.77
   1  -7   1   15.80    1.89
   1  -7   1   16.05    0.59
  -1  -7  -1   16.97    0.84
   5  -5   0  139.34    5.78
   5  -5   0  136.60    3.66
   5  -5   0  133.78    3.05
  -5   5   0  129.60    3.64
  -5  -5   0  137.76    5.43
  -5  -5   0  139.79    3.27
  -5   5   0  131.98    3.21
  -5  -3   3   57.60    1.68
  -5   3   3   56.78    1.93
  -5  -3   3   56.46    2.39
  -5  -3   3   59.63    1.82
   5  -3  -3   56.47    1.65
  -5   3   3   56.35    1.52
   5   3  -3   60.09    3.47
  -5   3   3   58.21    1.70
   5  -4   2    2.09    1.44
   5  -4   2    0.81    0.21
   5  -4   2    1.18    0.88
  -5  -4  -2    0.91    0.19
  -5   4  -2    0.81    0.45
  -5   4  -2    0.95    0.23
  -5   4  -2    0.42    1.36
  -5  -4  -2    0.15    0.71
  -5  -4  -2    1.05    0.23
  -1  -1  -5  283.12    7.57
  -1  -1  -5  285.19    6.31
  -1   1  -5  276.63    6.04
   1  -1   5  281.63    6.05
  -1   1  -5  277.70    7.27
   1  -1   5  287.22    7.71
  -1   1  -5  281.90    6.24
   1   1   5  278.00    6.03
  -1   1  -5  280.34    6.19
   1   1   5  281.58    6.06
   6  -2   2   52.16    2.87
   6  -2   2   52.55    2.50
  -6  -2  -2   53.46    1.40
  -6   2  -2   49.47    1.30
  -6   2  -2   44.97    3.37
  -6  -2  -2   49.18    3.14
  -6  -2  -2   50.26    2.39
  -6   2  -2   51.46    1.92
   6   2   2   50.82    1.45
   6  -2   2   50.98    1.36
  -4  -4  -3  208.73    4.64
  -4  -4  -3  214.70    4.67
   4  -4   3  195.36    5.81
  -4  -4  -3  220.87    4.88
  -4   4  -3  214.95    4.70
  -4   4  -3  222.39    8.07
  -4   4  -3  210.58    5.15
   4  -4   3  198.82    5.58
   2   0  -5    0.28    0.72
  -2   0   5    0.01    0.18
   2   0  -5    0.13    0.27
  -2   0   5   -0.17    0.17
  -2   0   5    0.24    0.22
   2   0  -5    0.43    0.36
  -3   6   2    2.13    0.24
  -3  -6   2    2.09    0.26
  -3  -6   2    2.27    0.30
   3   6  -2    2.64    0.50
  -3   6   2    1.81    0.28
   3   6  -2    2.32    0.33
   3  -6  -2    2.26    0.40
  -3  -6   2    3.06    0.64
   3  -6  -2    2.02    0.28
   3  -6  -2    2.62    0.62
  -3   6   2    2.36    0.38
   2  -4   4  288.16    7.64
  -2  -4  -4  289.73    6.32
  -2   4  -4  289.39    6.25
  -2  -4  -4  295.35    6.49
   2  -4   4  302.14    6.59
  -2   4  -4  284.59    8.96
   7   0   0    2.26    0.33
   7   0   0    5.45    2.00
  -7   0   0    1.82    1.19
  -7   0   0    2.53    0.28
  -7   0   0    2.10    0.52
   2   7   0  207.27    4.56
   2  -7   0  204.58    4.84
  -2  -7   0  204.45    4.73
  -2  -7   0  215.70    4.72
  -2   7   0  211.57    4.86
   2  -7   0  209.74    6.00
  -2  -7   0  213.44    4.89
  -2   7   0  212.45    4.78
   2  -7   0  210.85    4.59
  -2   7   0  208.83    4.58
  -2   7   0  207.11    4.61
  -2  -7   0  210.92    4.71
   2   7   0  220.10    4.84
  -4   6   0    0.53    0.31
  -4  -6   0    0.23    0.21
  -4  -6   0    0.50    0.20
  -4  -6   0    0.64    0.27
   4  -6   0    0.98    0.44
  -4  -6   0    0.47    0.67
   4  -6   0    0.48    0.19
  -4  -6   0    0.06    0.28
   4  -6   0   -0.07    1.18
  -4   6   0    0.39    0.17
  -4   6   0    0.75    0.52
  -5   5   1  561.79   11.89
   5  -5  -1  559.43   12.22
   5  -5  -1  527.98   11.13
  -5   5   1  567.41   11.87
   5  -5  -1  556.53   13.91
  -5  -5   1  513.98   14.40
  -5  -5   1  557.43   11.89
  -5  -5   1  556.61   12.19
   0  -2   5  217.89    4.86
   0  -2  -5  203.92    4.74
   0   2  -5  211.29    4.71
   0   2  -5  206.71    5.52
   0  -2  -5  214.96    5.96
   0   2  -5  196.71    4.53
   0  -2   5  196.05    5.69
   0   2   5  202.38    4.45
   0   2   5  211.08    4.71
   0  -2   5  211.78    4.64
   0   2  -5  207.67    4.68
   0   2   5  208.56    4.62
  -3   5  -3  299.51    6.44
  -3  -5  -3  292.86    6.37
   3  -5   3  282.59    6.06
  -3   5  -3  287.56    9.10
   3  -5   3  281.53    8.01
  -3  -5  -3  301.67    6.49
  -3   5  -3  294.88    6.79
   3  -5   3  297.46    7.37
  -3  -5  -3  312.18    6.80
  -3   5  -3  292.84    6.38
   2  -1  -5  587.39   13.81
  -2   1   5  600.98   12.61
   2  -1  -5  597.34   12.66
   2   1  -5  591.87   12.53
  -2  -1   5  624.20   13.07
   2   1  -5  609.49   13.98
   2   1  -5  615.09   13.25
   2  -1  -5  622.79   13.48
  -2   1   5  612.56   12.89
  -2  -1   5  609.52   12.79
  -2   1   5  607.03   12.85
   0   6  -3  185.97    5.29
   0  -6   3  189.97    4.19
   0   6   3  190.24    4.25
   0   6   3  186.59    4.13
   0  -6   3  184.48    4.74
   0   6  -3  187.97    4.45
   0   6  -3  178.78    4.16
   0  -6  -3  183.47    4.26
   0  -6   3  176.47    3.97
   1  -2  -5  182.08    4.37
   1   2  -5  178.34    4.06
   1   2  -5  179.84    4.24
  -1  -2   5  174.46    3.98
   1   2  -5  177.71    4.78
  -1   2   5  185.75    4.17
  -1  -2   5  177.65    3.95
  -1  -2   5  177.59    5.28
  -1   2   5  180.05    4.04
  -1   2   5  180.22    4.11
  -7  -1   0  110.95    3.54
  -7  -1   0  101.63    2.45
  -7  -1   0  110.68    4.69
  -7   1   0  101.03    2.84
   7  -1   0  105.76    3.69
   7   1   0  110.58    4.61
  -7   1   0   99.90    3.84
  -7   1   0   98.40    2.35
  -7   0   1   -0.04    0.28
  -7   0   1   -0.54    0.81
   7   0  -1   -0.50    1.76
  -7   0   1   -0.09    0.19
  -3  -6  -2  664.25   14.08
  -3   6  -2  687.46   15.71
   3  -6   2  695.15   20.04
   3  -6   2  694.29   16.58
  -3   6  -2  648.04   13.58
  -3  -6  -2  688.59   16.53
  -3   6  -2  677.78   14.42
  -3  -6  -2  671.89   14.07
   3  -6   2  681.29   14.96
  -3  -6  -2  621.34   13.10
  -3  -6  -2  665.72   13.88
   1   6  -3   17.18    0.80
  -1  -6   3   17.82    0.71
   1   6  -3   19.25    0.98
  -1   6   3   16.84    0.70
   1   6  -3   16.31    0.78
  -1   6   3   17.63    0.69
  -1  -6   3   17.48    1.06
   1  -6  -3   17.45    0.84
   1  -6  -3   16.12    0.67
   1   6  -3   15.67    0.65
  -1  -6   3   17.35    0.64
  -1   6   3   17.39    0.61
  -6   3   2  180.71    4.43
  -6  -3   2  172.65    4.66
  -6  -3   2  178.00    4.48
  -6  -3   2  185.81    4.55
  -6   3   2  176.86    4.03
   6  -3  -2  185.70    4.58
   6  -3  -2  171.20    3.93
   6   3  -2  183.04    6.98
  -5  -5  -1   45.18    1.34
  -5   5  -1   49.05    1.60
  -5  -5  -1   47.08    1.31
   5  -5   1   46.92    1.83
  -5  -5  -1   46.97    1.30
  -5  -5  -1   41.59    2.22
   5  -5   1   49.18    3.71
  -5   5  -1   43.10    2.06
  -5   5  -1   41.13    1.13
   5  -5   1   47.14    1.26
  -6   0   3    0.34    0.37
   6   0  -3   -0.32    0.87
  -6   0   3    0.06    0.48
  -6   0   3    0.18    0.24
  -4  -6   1    0.11    0.18
  -4   6   1    0.19    0.45
   4  -6  -1    0.50    0.82
  -4  -6   1    0.14    1.41
  -4   6   1    0.35    0.31
  -4  -6   1   -0.02    0.33
   4   6  -1    0.09    0.22
   4  -6  -1    0.30    0.42
   4  -6  -1    0.07    0.17
  -4  -6   1    0.15    0.28
  -4   6   1    0.06    0.16
  -4  -6   1    0.21    0.19
   2   7  -1   27.41    1.23
   2   7  -1   30.23    0.98
  -2  -7   1   29.62    1.13
  -2   7   1   31.13    0.93
  -2   7   1   29.43    1.04
   2   7  -1   28.22    0.95
  -2  -7   1   29.47    0.90
   2  -7  -1   29.73    1.46
  -2  -7   1   28.10    1.41
  -2  -7   1   31.65    1.02
   2  -7  -1   29.45    0.88
  -2   7   1   28.76    0.94
  -6  -4   0  200.09    4.44
   6  -4   0  210.63    7.90
  -6  -4   0  221.95    8.15
  -6  -4   0  195.46    4.55
   6  -4   0  200.76    5.16
  -6   4   0  192.81    4.26
   6  -4   0  201.00    4.45
  -6   4   0  197.00    4.60
  -4  -2  -4   35.98    1.99
   4  -2   4   38.02    2.16
  -4   2  -4   37.53    1.75
  -4  -2  -4   35.20    1.08
  -4   2  -4   35.31    1.08
  -4   2  -4   37.63    1.08
  -4   2  -4   36.23    2.58
  -4  -2  -4   37.70    1.12
  -4  -2  -4   35.64    1.69
  -4  -2  -4   37.16    1.06
   4  -2   4   36.30    1.02
   4   2   4   36.73    1.05
  -2   0  -5   -0.03    0.24
   2   0   5    0.17    0.22
  -2   0  -5   -0.16    0.24
  -2   0  -5   -0.02    0.16
   2   0   5   -0.07    0.14
  -1   6  -3   -0.08    0.22
  -1   6  -3    0.14    0.22
  -1   6  -3   -0.11    0.42
   1  -6   3    0.24    0.19
   1   6   3    0.21    0.20
   1  -6   3   -0.06    0.19
  -1   6  -3   -0.29    0.73
   1  -6   3   -0.27    0.63
  -1  -6  -3    0.13    0.29
   1   2   5   91.43    2.23
   1  -2   5   92.04    2.24
  -1   2  -5   99.64    3.20
  -1   2  -5   94.01    2.30
  -1   2  -5   96.05    2.36
   1   2   5   94.27    2.23
   1  -2   5   91.05    3.37
  -1  -2  -5   94.25    3.35
   1  -2   5   95.11    2.25
  -1   2  -5   93.06    3.07
  -1  -2  -5   89.69    2.32
  -1   2  -5   93.12    2.37
   7  -1  -1   30.53    1.00
  -7  -1   1   32.69    1.05
   7  -1  -1   30.90    1.79
  -7   1   1   31.95    0.98
  -7   1   1   33.37    1.73
   7  -1  -1   30.12    3.08
   7   1  -1   33.28    3.20
  -7  -1   1   29.68    1.30
  -7   1   1   31.12    1.14
  -7  -1   1   30.15    1.87
  -2   7  -1   38.51    1.25
  -2   7  -1   38.57    1.10
   2   7   1   40.87    1.17
   2  -7   1   39.55    1.49
  -2   7  -1   40.24    1.43
  -2  -7  -1   42.75    1.32
   2  -7   1   39.40    2.83
  -2   7  -1   37.78    1.14
   2   7   1   41.50    1.16
  -2  -7  -1   40.16    1.27
   2  -7   1   37.91    1.05
  -2  -7  -1   38.54    1.08
  -6  -1   3  175.74    4.02
  -6  -1   3  190.09    4.53
   6  -1  -3  191.12    4.74
  -6   1   3  194.09    4.58
  -6  -1   3  198.65    4.89
   6  -1  -3  193.91    5.65
   6   1  -3  184.68    6.02
  -4   6  -1  329.33    7.28
  -4  -6  -1  334.42    7.22
  -4  -6  -1  287.03    6.79
  -4  -6  -1  330.01    7.20
   4  -6   1  347.03    7.38
   4  -6   1  329.11   10.64
  -4  -6  -1  345.10    8.41
  -4  -6  -1  339.74    7.31
  -4   6  -1  322.41    7.71
  -5  -3  -3   82.34    3.03
  -5   3  -3   95.39    2.36
  -5   3  -3   87.88    2.69
  -5  -3  -3   90.45    2.15
  -5  -3  -3   92.89    3.30
   5  -3   3   94.46    2.24
   5  -3   3   86.50    3.27
   5   3   3   85.04    2.16
  -5   3  -3   92.03    2.19
  -5   3  -3   96.76    5.09
   3   4  -4  124.35    3.16
  -3  -4   4  130.64    3.03
  -3  -4   4  129.42    4.07
   3  -4  -4  127.80    3.27
   3  -4  -4  126.22    2.96
  -3   4   4  128.63    3.01
  -3  -4   4  124.33    3.00
   3   4  -4  124.78    3.36
  -3   4   4  123.86    2.94
   3   4  -4  130.14    3.42
  -3   4   4  123.23    3.07
   7   0   1   -0.16    0.25
  -7   0  -1    0.17    0.22
  -7   0  -1   -0.80    1.66
  -7   0  -1   -0.04    0.65
  -4   3   4  161.28    3.72
  -4   3   4  167.20    4.05
  -4  -3   4  158.40    3.75
  -4  -3   4  158.83    3.63
  -4  -3   4  157.58    3.62
  -4  -3   4  160.15    4.97
   4   3  -4  165.62    4.02
  -4   3   4  165.30    3.82
   4  -3  -4  164.60    3.76
   4   3  -4  154.77    4.26
  -2   1  -5  234.29    6.07
   2   1   5  234.22    5.16
   2   1   5  228.49    5.06
   2  -1   5  228.40    4.96
  -2  -1  -5  226.79    5.09
   2  -1   5  227.81    6.35
  -2  -1  -5  233.85    5.18
  -2   1  -5  228.43    5.03
  -2   1  -5  228.71    5.12
  -2   1  -5  219.51    4.85
  -6   4   1    1.48    0.35
  -6  -4   1    1.65    0.31
  -6  -4   1    2.34    1.14
   6  -4  -1    2.14    1.48
   6   4  -1    1.58    0.73
  -6   4   1    1.51    0.57
   6  -4  -1    1.64    0.46
   6  -4  -1    1.69    0.27
  -6  -4   1    1.43    0.51
   5   0  -4  309.79    7.43
  -5   0   4  306.00    6.70
   5   0  -4  300.68    6.47
   0  -5  -4  224.63    5.39
   0   5  -4  222.59    7.89
   0   5  -4  224.79    5.09
   0   5   4  232.59    5.15
   0  -5   4  222.54    4.91
   0   5  -4  233.49    5.14
   0   5   4  231.04    5.09
   0   5  -4  237.20    5.25
   0  -5   4  230.00    5.00
   0   5   4  222.96    4.88
   0   5  -4  233.00    5.49
   0  -5   4  215.47    5.73
   0  -5  -4  225.41    5.08
  -2   2   5   31.22    1.00
   2  -2  -5   33.41    1.37
  -2  -2   5   31.13    1.78
  -2  -2   5   31.73    1.04
  -2  -2   5   31.62    0.97
  -2   2   5   31.35    0.99
  -2   2   5   32.26    1.06
   2   2  -5   30.76    1.05
   2   2  -5   30.98    1.49
   2  -2  -5   31.00    1.08
  -2  -2   5   32.05    0.98
   2   2  -5   30.14    1.17
   0  -7   2    8.91    0.42
   0   7   2    8.75    0.45
   0   7  -2    8.38    0.59
   0  -7   2    8.11    0.79
   0  -7  -2    8.65    0.41
   0  -7   2    8.50    1.78
   0   7   2    7.58    0.43
   0   7  -2    8.16    0.54
   0  -7  -2    8.90    0.61
   0  -7  -2    8.97    0.56
   0  -7   2    8.52    0.45
   0   7  -2    8.62    0.51
   0   7   2    8.99    0.43
   0   7  -2    8.62    0.46
   7  -1   1  717.86   17.28
  -7  -1  -1  680.29   14.18
  -7   1  -1  686.33   14.30
  -7  -1  -1  702.74   18.06
   7   1   1  669.56   14.07
  -7  -1  -1  659.69   17.83
  -7   1  -1  710.57   17.68
   7   1   1  692.41   18.41
  -7   1  -1  690.38   19.57
   7  -1   1  669.73   15.66
  -7   2   0   37.06    2.06
  -7   2   0   38.96    1.11
   7  -2   0   36.17    1.95
  -7   2   0   36.64    1.35
  -7  -2   0   40.26    1.19
   7   2   0   38.16    2.33
   7  -2   0   39.64    3.48
  -7  -2   0   40.40    2.96
   7  -2   0   37.43    1.15
  -7  -2   0   37.19    2.01
  -1  -5   4   -0.62    0.54
  -1   5   4    0.01    0.13
   1  -5  -4    0.33    0.38
  -1  -5   4    0.07    0.18
   1   5  -4   -0.60    1.26
   1   5  -4    0.27    0.26
  -1  -5   4   -0.20    0.20
  -1   5   4   -0.00    0.19
   1   5  -4   -0.02    0.25
   1  -5  -4    0.20    0.24
   1   5  -4   -0.08    0.37
   1   5  -4    0.08    0.16
  -2   6   3  128.74    3.04
  -2  -6   3  132.75    3.13
   2  -6  -3  133.74    3.76
  -2   6   3  130.56    2.96
  -2  -6   3  132.74    3.03
  -2   6   3  132.97    3.65
   2   6  -3  133.88    3.75
   2  -6  -3  128.38    3.10
   2   6  -3  132.21    3.22
  -2  -6   3  121.59    3.67
   2  -6  -3  128.63    3.07
  -5  -1   4  102.41    2.70
   5  -1  -4  104.15    3.07
  -5   1   4  101.40    2.53
   5   1  -4   97.53    3.05
  -5  -1   4  102.76    2.55
  -5   1   4   93.83    2.35
   5  -1  -4  105.91    3.59
   5  -1  -4  102.77    2.49
  -5   1   4   98.94    2.69
  -6   3  -2   98.19    2.58
  -6  -3  -2   95.56    4.26
   6  -3   2   96.20    4.43
  -6   3  -2   97.50    3.04
  -6  -3  -2   96.08    2.55
   6  -3   2   94.88    3.60
  -6  -3  -2   99.68    3.64
   3   0  -5   -0.18    0.72
   3   0  -5    0.36    0.43
  -3   0   5    0.11    0.20
  -3   0   5   -0.19    0.21
   3   0  -5   -0.14    0.35
   1   7  -2    8.95    0.58
  -1  -7   2    8.59    0.47
   1   7  -2    8.48    0.49
  -1  -7   2    8.72    1.37
  -1   7   2    8.90    0.52
  -1  -7   2    8.98    0.76
   1  -7  -2    8.98    0.45
  -1   7   2    9.45    0.45
   1   7  -2    4.03    0.30
  -1   7   2    8.35    0.48
   1   7  -2    9.26    0.59
  -1  -7   2    9.14    0.45
  -1   7   2    9.19    0.52
   1  -7  -2    8.68    0.69
  -6  -4  -1    0.23    0.21
   6  -4   1    0.11    0.64
  -6   4  -1    0.42    0.37
  -6  -4  -1    0.30    0.22
   6  -4   1    0.61    0.22
  -6  -4  -1    1.67    1.35
   6  -4   1    0.49    1.83
  -6   4  -1    0.66    0.19
  -1  -7  -2    4.18    0.42
   1  -7   2    3.90    1.62
   1   7   2    4.06    0.34
   1   7   2    3.73    0.32
   1  -7   2    3.96    0.63
  -1   7  -2    4.24    0.34
   1  -7   2    4.15    0.31
  -1   7  -2    4.25    0.54
  -1   7  -2    3.82    0.36
  -1  -7  -2    4.39    0.41
  -1  -7  -2    3.99    0.28
  -1   5  -4  144.42    4.09
  -1   5  -4  149.46    3.85
  -1   5  -4  149.01    6.58
  -1  -5  -4  143.52    3.78
  -1   5  -4  148.90    3.92
   1  -5   4  146.36    3.72
  -1  -5  -4  132.12    3.47
  -1  -5  -4  140.82    3.84
   1  -5   4  142.90    4.58
   1  -5   4  141.31    3.66
   1   5   4  155.62    4.01
  -7   2   1   60.68    2.37
   7  -2  -1   64.85    2.71
  -7  -2   1   65.86    2.72
  -7  -2   1   59.83    2.82
   7   2  -1   61.51    3.77
  -7  -2   1   66.37    1.86
  -7   2   1   63.15    1.95
   7  -2  -1   63.43    1.87
  -7   2   1   63.28    1.79
  -7  -2   1   68.11    1.99
  -3   1   5   20.24    0.78
   3  -1  -5   21.20    1.56
   3  -1  -5   20.00    0.92
   3   1  -5   20.21    1.33
  -3  -1   5   17.87    0.78
   3   1  -5   20.62    0.94
  -3  -1   5   20.83    0.80
  -3  -1   5   20.46    0.77
   3  -1  -5   20.16    1.08
   3   1  -5   21.03    1.08
  -3   1   5   20.48    0.85
   0   3  -5   42.21    1.32
   0  -3  -5   43.75    1.51
   0  -3   5   44.48    1.32
   0   3  -5   47.99    2.14
   0   3   5   42.39    1.27
   0  -3  -5   41.49    1.35
   0   3   5   44.60    1.36
   0   3  -5   40.82    1.72
   0  -3   5   40.00    2.20
   0  -3   5   44.65    1.39
   0   3  -5   44.99    1.42
   0   3  -5   43.13    1.44
   0   3   5   46.50    1.44
  -3  -7   0   34.56    1.09
  -3   7   0   35.50    1.10
  -3  -7   0   35.27    1.25
  -3   7   0   32.77    1.15
   3   7   0   34.86    1.09
  -3  -7   0   34.22    1.18
  -3   7   0   37.16    1.22
  -3  -7   0   34.28    1.18
  -3   7   0   34.78    1.35
   3  -7   0   34.81    2.26
   3  -7   0   33.93    1.06
   4  -5  -3   31.00    1.47
  -4   5   3   29.34    1.09
  -4   5   3   30.85    1.34
  -4  -5   3   26.62    1.02
   4  -5  -3   30.36    1.13
   4  -5  -3   26.96    0.97
  -4   5   3   31.69    1.02
   4   5  -3   27.54    1.34
  -4  -5   3   30.69    1.39
  -4   5   3   30.65    0.99
  -4  -5   3   31.52    1.06
   4   5  -3   30.61    1.09
   6   2  -3    2.48    1.23
  -6  -2   3    2.08    0.45
  -6  -2   3    1.46    0.40
   6  -2  -3    0.32    0.88
  -6   2   3    2.36    0.49
  -6   2   3    2.19    0.30
   6  -2  -3    2.25    0.40
  -6   2   3    1.92    0.51
  -5  -5   2  127.21    3.36
  -5  -5   2  137.85    4.08
   5  -5  -2  138.30    4.63
  -5  -5   2  135.65    3.76
   5  -5  -2  133.58    3.52
  -5   5   2  135.22    3.52
   5  -5  -2  130.77    3.64
   5   5  -2  131.86    3.39
  -5  -5   2  140.59    3.91
  -5   5   2  124.74    3.48
  -5   5   2  138.83    3.56
   2  -6   3   79.64    2.14
   2   6   3   88.39    2.39
  -2   6  -3   84.43    2.37
  -2  -6  -3   84.46    2.31
   2  -6   3   81.69    2.84
  -2   6  -3   83.19    2.26
  -2  -6  -3   84.06    2.45
   2  -6   3   79.25    3.33
  -2   6  -3   81.16    3.61
  -2  -6  -3   83.57    2.34
  -3   4  -4  147.01    3.77
   3  -4   4  133.94    3.42
  -3   4  -4  141.44    6.19
  -3  -4  -4  144.42    3.75
   3  -4   4  150.42    5.04
  -3   4  -4  146.60    4.24
  -3  -4  -4  147.63    3.86
  -1   3   5   20.33    0.80
  -1  -3   5   19.30    1.56
   1   3  -5   19.76    0.79
  -1  -3   5   19.58    0.78
  -1   3   5   19.87    0.76
   1   3  -5   20.32    0.90
   1   3  -5   19.44    1.12
  -1  -3   5   20.11    0.74
  -1   3   5   19.78    0.76
   1  -3  -5   20.46    1.00
  -5  -4   3   38.15    1.67
  -5   4   3   36.34    1.15
  -5  -4   3   36.65    1.26
  -5  -4   3   36.56    1.21
  -5   4   3   34.08    1.45
  -5  -4   3   38.12    1.38
   5  -4  -3   37.54    1.79
  -5   4   3   37.29    1.34
   5  -4  -3   39.41    1.38
   5   4  -3   37.91    1.21
  -5   4   3   38.22    1.17
   5   4  -3   40.12    3.23
   2  -2   5   89.20    3.52
  -2   2  -5   94.51    2.55
  -2  -2  -5   94.69    2.61
  -2   2  -5   96.23    2.59
  -2  -2  -5   89.83    2.47
  -2   2  -5   91.10    3.36
   2   2   5  101.29    2.73
   2  -2   5   91.52    2.49
   2   2   5   94.50    2.49
  -2  -2  -5   96.47    2.68
   2  -2   5   95.68    2.52
  -2   2  -5   95.23    2.64
   6   0   3    0.64    0.70
  -6   0  -3   -1.62    1.49
  -6   0  -3   -0.12    0.16
   6   0   3   -0.01    0.17
  -6   0  -3   -1.23    0.71
   7   0  -2   14.39    2.23
  -7   0   2   14.61    0.67
  -7   0   2   15.49    1.03
   7  -2   1  219.57    8.07
  -7  -2  -1  216.41    5.42
  -7   2  -1  219.93    7.49
  -7   2  -1  232.76    5.76
  -7  -2  -1  219.84    6.71
   7   2   1  231.35    6.93
  -7  -2  -1  223.11    8.51
  -7   2  -1  218.31    5.90
   7  -2   1  222.15    6.81
   4  -3   4  313.54    7.65
  -4   3  -4  322.54    7.89
  -4  -3  -4  320.97    7.84
  -4   3  -4  308.90    8.20
  -4   3  -4  333.88   11.04
  -4  -3  -4  314.21    7.74
  -4   3  -4  317.96    7.84
  -4  -3  -4  326.98    8.03
   4  -3   4  324.94    9.36
   4   3   4  320.70    7.90
  -4  -3  -4  326.81    9.12
  -4  -3  -4  310.60    8.44
   6  -1   3  105.75    3.86
  -6  -1  -3  111.94    4.09
  -6   1  -3  106.45    3.63
   6   1   3  102.28    2.74
   6  -1   3  109.69    3.82
  -6   1  -3  106.35    2.77
  -6  -1  -3  108.03    4.71
  -6   1  -3  108.88    5.41
  -6  -1  -3  105.82    2.76
   6  -1   3  105.41    2.77
  -4  -6   2   59.67    1.99
  -4   6   2   54.68    1.55
  -4   6   2   53.26    1.71
   4  -6  -2   56.29    2.34
   4  -6  -2   58.22    1.71
   4   6  -2   53.94    1.58
  -4  -6   2   57.62    1.68
  -4  -6   2   54.59    1.71
  -4   6   2   55.68    1.63
   4  -6  -2   53.82    1.77
  -1   3  -5   -0.11    0.60
   1  -3   5   -0.04    0.19
  -1   3  -5    0.19    0.23
   1   3   5    0.12    0.14
   1   3   5   -0.02    0.20
  -1   3  -5   -0.21    0.21
  -1   3  -5   -0.27    0.25
   1  -3   5   -0.14    0.87
   1  -3   5   -0.05    0.20
  -1   3  -5    1.07    0.60
  -1  -3  -5    0.15    0.28
   1   3   5    0.05    0.18
  -3   7   1   31.37    1.17
   3   7  -1   29.46    0.99
  -3   7   1   30.34    1.05
  -3  -7   1   31.65    1.97
  -3  -7   1   31.36    1.10
   3  -7  -1   30.55    1.22
  -3  -7   1   31.89    1.25
  -3   7   1   32.00    1.01
  -3  -7   1   31.63    1.02
  -3  -7   1   32.07    1.22
   3  -7  -1   31.16    1.70
   3  -7  -1   30.47    0.98
  -5   2   4   44.53    1.44
  -5  -2   4   39.41    1.29
   5  -2  -4   42.95    1.81
  -5   2   4   45.64    1.64
   5  -2  -4   44.38    1.41
   5   2  -4   44.51    2.11
  -5  -2   4   44.97    1.55
  -5   2   4   45.18    1.44
  -7  -1   2    1.75    0.56
  -7   1   2    1.45    0.53
   7  -1  -2    3.84    1.76
  -7   1   2    1.76    0.24
  -7   1   2    1.41    0.29
   7   1  -2    2.09    1.69
  -7  -1   2    2.14    0.33
   7  -1  -2    1.65    0.65
  -2  -7   2  114.58    3.36
   2  -7  -2  109.80    2.89
  -2   7   2  114.08    3.07
  -2   7   2  116.80    3.03
  -2  -7   2  114.19    2.97
  -2  -7   2  114.62    3.07
  -2   7   2  110.68    3.34
   2   7  -2  109.62    2.96
   2   7  -2  115.29    3.10
  -2   7   2  113.46    2.97
   2  -7  -2  114.43    3.42
   2   7  -2  119.23    3.47
  -3   7  -1    6.91    0.43
  -3  -7  -1    6.96    0.39
   3  -7   1    6.94    0.74
   3  -7   1    7.30    0.39
  -3  -7  -1    7.50    0.52
  -3   7  -1    6.77    0.54
  -3   7  -1    7.06    0.40
  -3  -7  -1    6.89    0.45
   3  -7   1    5.50    1.97
  -3   7  -1    6.77    0.67
  -3  -7  -1    7.31    0.47
  -3   0  -5    0.03    0.17
  -3   0  -5   -0.07    0.85
  -3   0  -5    0.18    0.23
   3   0   5   -0.08    0.15
  -3   0  -5   -0.31    0.62
  -5  -5  -2    1.43    0.27
  -5   5  -2    0.42    0.45
   5  -5   2    1.31    0.75
  -5  -5  -2    0.69    0.22
  -5   5  -2    0.85    0.21
  -5  -5  -2    0.55    0.18
  -5   5  -2    0.51    1.15
  -5  -5  -2    1.70    0.65
   5  -5   2    0.76    1.54
   5  -5   2    0.86    0.21
  -5   0  -4  222.43    5.52
   5   0   4  226.53    5.61
  -5   0  -4  224.34    5.64
  -5   0  -4  223.00    6.74
  -5   0  -4  204.03    6.76
  -3  -2   5  123.92    3.24
   3   2  -5  127.24    3.84
  -3   2   5  119.20    3.15
   3  -2  -5  114.55    3.48
  -3  -2   5  132.82    3.47
  -3  -2   5  131.78    3.51
   3   2  -5  132.11    3.79
   3   2  -5  124.84    3.44
   3  -2  -5  130.46    3.58
  -3   2   5  125.53    3.39
   6  -4  -2   34.91    1.18
  -6   4   2   35.02    1.40
  -6   4   2   33.04    1.05
   6  -4  -2   34.21    2.17
   6   4  -2   35.70    2.37
  -6  -4   2   34.89    1.66
  -6  -4   2   32.00    1.37
  -6   4   2   33.88    1.13
  -6  -4   2   36.69    1.40
   6  -4  -2   34.79    1.40
  -4  -5  -3    1.57    0.23
  -4   5  -3    1.85    0.27
  -4   5  -3    2.08    0.26
  -4  -5  -3    2.11    0.30
   4  -5   3    1.94    1.10
  -4   5  -3    1.48    1.33
   4  -5   3    2.04    0.24
  -4  -5  -3    1.64    0.19
   4  -5   3    2.76    0.94
  -4   5  -3    1.55    0.50
  -2  -7  -2   33.98    1.19
  -2  -7  -2   34.85    1.18
   2  -7   2   33.42    1.49
   2  -7   2   31.92    2.90
  -2   7  -2   35.38    1.30
  -2   7  -2   34.45    1.53
  -2  -7  -2   33.94    1.04
   2  -7   2   34.04    1.05
   2   7   2   36.53    1.16
  -2   7  -2   35.99    1.20
  -2   7  -2   33.11    1.06
   2   3  -5  240.87    6.10
  -2  -3   5  252.16    7.63
  -2  -3   5  232.62    5.79
  -2   3   5  240.49    5.99
  -2   3   5  225.71    5.71
   2   3  -5  239.57    6.43
   2  -3  -5  245.33    6.57
  -2  -3   5  245.81    6.17
   2   3  -5  247.60    6.42
  -2   3   5  241.46    6.09
  -2  -5  -4  250.28    6.26
   2   5   4  262.96    6.50
  -2   5  -4  250.67    6.21
   2  -5   4  254.31    7.31
   2  -5   4  264.08    6.57
  -2   5  -4  253.54    6.37
  -2  -5  -4  246.58    6.25
  -2   5  -4  256.49    9.63
  -7   3   0  365.06   10.04
  -7  -3   0  350.80   11.54
  -7  -3   0  409.16    9.92
  -7   3   0  382.42    9.58
   7   3   0  392.67   10.80
   7  -3   0  387.29   10.45
  -7   3   0  390.91    9.49
  -7  -3   0  379.52   10.43
  -7  -3   0  402.01    9.88
   7  -3   0  395.00    9.66
   7  -3   0  383.85   12.85
  -3   1  -5   24.17    1.64
  -3  -1  -5   22.00    0.80
  -3  -1  -5   21.10    1.65
  -3   1  -5   22.55    0.88
   3   1   5   20.98    0.73
  -3   1  -5   22.10    0.80
   3  -1   5   21.95    0.75
   3  -1   5   23.82    1.68
  -3   1  -5   22.04    1.50
  -3   1  -5   22.04    0.81
  -3  -1  -5   23.09    0.89
   4  -6   2   13.91    0.56
  -4   6  -2   11.21    0.51
  -4  -6  -2   12.96    0.57
  -4   6  -2   13.53    0.81
  -4  -6  -2   13.37    0.61
  -4  -6  -2   14.21    0.64
  -4   6  -2   13.26    0.62
  -4   6  -2   12.15    1.24
   4  -6   2   13.04    2.22
  -4  -6  -2   13.66    0.63
  -5  -1  -4    7.74    1.13
   5   1   4    8.00    0.41
  -5   1  -4    8.70    1.12
  -5   1  -4    7.85    0.42
  -5  -1  -4    8.56    0.49
  -5   1  -4    8.10    0.48
  -5  -1  -4    8.19    0.42
  -5  -1  -4    8.70    1.20
   5  -1   4    7.72    0.40
  -3  -6   3  146.26    3.84
  -3  -6   3  147.14    4.24
   3  -6  -3  146.53    4.15
  -3  -6   3  146.40    3.75
  -3   6   3  149.45    3.79
   3  -6  -3  149.09    3.90
  -3   6   3  153.43    3.89
   3  -6  -3  147.62    3.91
   3   6  -3  152.27    4.01
   3   6  -3  151.39    4.30
  -3   6   3  144.67    4.05
  -5  -4  -3   27.43    0.95
  -5   4  -3   26.59    0.89
  -5  -4  -3   27.69    0.91
  -5   4  -3   27.10    2.78
  -5  -4  -3   27.51    0.98
  -5   4  -3   24.33    1.22
  -5  -4  -3   22.43    1.45
   5  -4   3   24.47    1.92
  -7   0  -2   73.23    4.44
  -7   0  -2   76.91    2.09
  -7   0  -2   75.40    2.88
   7   0   2   76.94    2.16
  -5   6   0   47.05    2.09
  -5   6   0   45.55    2.27
   5  -6   0   48.35    3.93
  -5  -6   0   49.45    1.48
  -5  -6   0   49.66    1.56
  -5  -6   0   46.53    1.45
  -5  -6   0   50.05    1.84
  -5   6   0   48.50    1.40
   5  -6   0   47.00    2.39
   5  -6   0   46.81    1.38
  -5  -6   0   47.91    2.99
   4  -4  -4  125.82    3.34
  -4   4   4  128.73    3.62
   4  -4  -4  122.80    3.59
   4   4  -4  122.28    3.36
   4   4  -4  135.13    4.67
  -4   4   4  116.91    3.10
  -4  -4   4  120.81    3.28
  -4   4   4  125.41    3.34
  -4  -4   4  115.80    3.05
  -4  -4   4  128.76    3.38
  -4  -4   4  124.54    4.23
   4   4  -4  122.52    3.67
  -6  -2  -3   17.06    1.83
  -6  -2  -3   17.29    1.46
  -6   2  -3   16.80    0.65
   6  -2   3   16.09    0.62
   6  -2   3   16.00    1.39
   6   2   3   17.28    0.73
  -6   2  -3   14.69    1.10
   6  -2   3   17.71    1.55
  -6  -2  -3   17.00    0.64
  -7  -3   1   47.51    1.51
   7  -3  -1   45.95    1.44
  -7   3   1   42.99    1.43
  -7  -3   1   43.61    2.16
  -7  -3   1   48.61    2.70
  -7  -3   1   45.00    1.40
   7  -3  -1   36.80    3.17
   7   3  -1   48.24    2.75
   7  -3  -1   44.69    1.91
  -7   3   1   44.06    1.91
  -7   3   1   43.78    1.32
   7  -2  -2  353.57   10.98
   7  -2  -2  381.42   10.09
   7   2  -2  401.06   13.47
  -7  -2   2  380.41   10.00
  -7   2   2  390.14    9.53
  -7   2   2  381.03    9.74
  -7  -2   2  396.58    9.75
  -7  -2   2  335.54    8.75
   6   3  -3    2.37    1.63
  -6  -3   3    2.53    0.39
  -6   3   3    2.69    0.48
  -6   3   3    3.08    0.32
   6  -3  -3    2.92    0.43
  -6   3   3    2.63    0.51
  -6  -3   3    3.69    0.49
  -6  -3   3    2.57    0.82
   0   8   0  602.27   14.70
   0   8   0  643.92   15.47
   0   8   0  632.32   15.23
   0  -8   0  618.33   15.09
   0  -8   0  642.55   15.37
   0  -8   0  642.53   16.17
   7  -1   2   10.62    0.52
   7   1   2   10.66    0.56
   7  -1   2   11.43    1.20
  -7  -1  -2   10.35    2.06
  -7   1  -2   10.60    0.49
  -7   1  -2   11.16    2.55
  -7  -1  -2   11.36    0.52
  -7   1  -2   11.03    0.99
  -7  -1  -2   10.00    1.18
   7  -1   2   13.09    1.55
   6  -5   0  198.25    5.53
   6  -5   0  194.35    7.77
  -6   5   0  187.92    4.90
   6  -5   0  190.46    4.79
  -6  -5   0  196.10    4.97
  -6  -5   0  184.39    4.75
  -6  -5   0  191.49    7.55
  -2   3  -5    9.40    0.56
   2  -3   5    8.28    1.20
   2  -3   5    9.15    0.50
  -2   3  -5    9.41    0.50
  -2  -3  -5    8.80    0.52
  -2   3  -5   10.36    0.51
  -2   3  -5    9.28    0.93
  -2  -3  -5    9.11    0.52
   2   3   5    8.77    0.41
   2   3   5    9.07    0.49
   2  -3   5    9.15    0.44
  -2   3  -5    7.77    1.15
  -5   6   1   54.84    1.89
   5  -6  -1   53.14    1.87
  -5  -6   1   52.45    1.80
  -5  -6   1   51.30    3.52
   5  -6  -1   50.17    1.48
  -5  -6   1   51.52    1.65
  -5  -6   1   54.05    1.62
  -5   6   1   51.63    1.60
   5  -6  -1   53.16    2.89
  -5   6   1   51.01    1.47
  -5  -6   1   50.25    1.50
  -6   4  -2    6.48    1.61
  -6  -4  -2    6.15    0.38
  -6   4  -2    6.22    0.72
   6  -4   2    5.74    1.02
   6  -4   2    7.18    1.84
  -6   4  -2    6.08    0.37
  -6  -4  -2    5.79    1.23
   4   0  -5    0.31    0.49
   4   0  -5   -0.65    0.65
   4   0  -5   -0.16    0.48
  -4   0   5    0.18    0.22
  -3   6  -3  183.14    4.93
  -3   6  -3  188.23    4.73
  -3  -6  -3  180.24    4.61
  -3   6  -3  166.85    5.84
   3  -6   3  178.56    6.18
  -3  -6  -3  178.74    4.51
  -3  -6  -3  187.31    4.79
  -3   6  -3  182.16    4.66
   3  -6   3  178.14    4.45
   3  -6   3  177.40    5.19
   1  -8   0  812.13   19.39
  -1   8   0  847.48   14.66
   1  -8   0  813.24   19.73
  -1   8   0  850.63   14.56
   1   8   0  864.57   14.89
   1   8   0  819.37   19.59
  -1  -8   0  822.17   19.61
  -1   8   0  832.70   14.36
  -1  -8   0  784.77   19.25
   1  -8   0  840.69   16.33
   1   8   0  791.80   18.94
  -1   8   0  848.86   14.70
  -1  -8   0  828.01   14.56
  -3   5   4   36.07    1.19
  -3  -5   4   34.13    1.17
  -3   5   4   36.68    1.32
   3  -5  -4   37.58    1.48
   3   5  -4   32.73    1.93
   3   5  -4   35.92    1.99
  -3   5   4   34.46    1.09
  -3  -5   4   34.75    1.72
  -3  -5   4   35.79    1.14
   3   5  -4   35.86    1.31
   3  -5  -4   36.79    1.22
   3   5  -4   36.50    1.47
  -7  -3  -1   13.33    1.19
   7  -3   1   13.67    1.28
  -7   3  -1   12.51    0.80
   7  -3   1   16.35    2.62
  -7  -3  -1   11.11    2.20
  -7   3  -1   14.75    1.68
  -7   3  -1   14.06    0.58
  -7  -3  -1   14.27    0.62
   7   3   1   15.13    1.25
  -3   2  -5  317.34    7.78
   3  -2   5  323.63    7.87
   3   2   5  314.48    7.66
  -3  -2  -5  325.20    8.00
   3  -2   5  306.16    8.80
  -3   2  -5  321.75    7.97
  -3   2  -5  295.91    8.75
  -3  -2  -5  320.14    7.86
  -3  -2  -5  304.36    8.72
  -3  -2  -5  318.45    7.90
  -6   5   1  260.01    6.41
   6  -5  -1  232.73    7.82
   6  -5  -1  260.23    6.48
  -6  -5   1  255.36    6.45
  -6  -5   1  252.60    6.74
  -6  -5   1  235.06    8.08
   6  -5  -1  251.54    5.19
  -6   5   1  254.68    6.41
  -5  -2  -4    4.66    0.30
  -5  -2  -4    5.67    0.39
  -5   2  -4    6.29    1.85
  -5  -2  -4    4.55    0.35
  -5  -2  -4    4.25    0.94
  -5   2  -4    5.04    0.33
  -5   2  -4    4.47    0.37
  -5   2  -4    5.04    0.84
   5  -2   4    4.69    0.31
  -5  -2  -4    4.60    1.03
   5   2   4    4.19    0.30
  -5   3   4  428.73    7.71
  -5  -3   4  414.28    7.59
  -5  -3   4  398.40    7.17
  -5   3   4  432.64    7.75
  -5   3   4  464.16    8.66
  -5  -3   4  423.37    9.26
   5   3  -4  430.54    9.47
   5  -3  -4  424.02    7.76
   5   3  -4  422.19    7.66
   4   1  -5   11.91    0.73
   4   1  -5   10.51    0.85
   4  -1  -5   10.39    0.80
  -4   1   5   11.67    0.54
  -4  -1   5   10.79    0.50
   4   1  -5   13.21    1.01
  -4  -1   5   12.08    0.55
   4  -1  -5   10.55    1.13
  -4   1   5   12.46    0.63
  -4  -1   5   11.34    0.59
   4  -1  -5   11.52    0.78
   0  -4  -5   50.25    1.34
   0  -4   5   50.04    2.34
   0   4  -5   52.22    1.71
   0   4   5   51.05    1.21
   0   4  -5   52.73    1.34
   0   4   5   49.06    1.22
   0  -4   5   49.76    1.18
   0   4  -5   51.10    1.28
   0   4  -5   50.73    2.30
   0   4   5   43.78    1.19
   0  -4   5   49.88    1.26
   0   4   5   51.87    1.30
   0  -4  -5   50.11    1.50
   5  -6   1   13.30    0.96
   5  -6   1   12.20    0.49
  -5   6  -1   11.62    0.67
  -5  -6  -1   12.01    0.55
  -5  -6  -1   11.52    0.51
  -5  -6  -1   11.31    1.17
  -5  -6  -1   11.14    0.53
  -5  -6  -1   10.35    0.49
   5  -6   1    8.61    2.53
  -5   6  -1    9.82    0.93
   0   8  -1   25.95    0.84
   0  -8  -1   26.03    0.73
   0   8   1   26.96    0.80
   0  -8   1   26.88    1.98
   0   8  -1   26.04    0.92
   0  -8   1   27.46    1.12
   0  -8   1   26.44    0.75
   0  -8  -1   26.24    0.96
   0  -8  -1   26.01    1.09
   0   8   1   24.92    0.77
   0   8   1   27.54    0.85
   0   8  -1   27.47    0.83
  -3  -7   2  115.56    2.45
  -3  -7   2  113.03    2.70
  -3  -7   2  107.04    2.18
  -3   7   2  113.33    2.24
  -3   7   2  110.56    2.25
   3   7  -2  106.23    2.76
   3   7  -2  112.06    2.35
   3  -7  -2  114.29    2.54
   3  -7  -2  108.21    2.23
   3  -7  -2  109.47    2.92
  -3   7   2  113.72    2.43
   1   4  -5    0.20    0.22
  -1   4   5    0.62    0.28
   1   4  -5    0.50    0.21
  -1   4   5    0.35    0.24
  -1   4   5    0.21    0.18
   1   4  -5    0.66    0.55
  -1  -4   5    0.64    0.83
  -1  -4   5    0.42    0.26
   1  -4  -5    0.52    0.35
  -1   4   5    0.45    0.20
   1   4  -5    0.41    0.57
   1  -4  -5    0.94    0.36
  -4  -7   0    4.34    0.39
  -4   7   0    4.03    0.55
  -4  -7   0    4.55    0.35
  -4  -7   0    4.27    0.32
   4  -7   0    4.58    0.32
  -4   7   0    4.81    0.32
  -4  -7   0    4.10    0.84
   4  -7   0    4.27    1.41
  -4  -7   0    4.53    0.47
  -4   7   0    4.56    0.42
   4  -7   0    4.34    0.57
  -3  -3   5  264.79    6.50
  -3   3   5  266.10    4.92
  -3  -3   5  269.66    5.05
   3  -3  -5  230.52    4.96
   3  -3  -5  241.42    4.55
   3   3  -5  271.97    5.55
   3   3  -5  252.53    5.15
  -3   3   5  268.07    5.06
  -3  -3   5  245.99    4.61
   3   3  -5  278.44    5.39
  -3   3   5  273.39    5.12
   0   7  -3    2.09    0.41
   0  -7   3    1.60    0.59
   0  -7  -3    2.56    0.29
   0  -7   3    2.25    0.26
   0   7   3    2.07    0.23
   0   7   3    1.93    0.27
   0  -7  -3    3.45    0.48
   0   7  -3    1.58    0.44
   0  -7   3    1.85    0.24
   0   7  -3    1.89    0.32
   0  -7  -3    1.85    0.34
  -6   5  -1   77.61    1.65
   6  -5   1   79.29    4.48
  -6  -5  -1   79.77    1.83
  -6   5  -1   77.10    2.76
   6  -5   1   76.43    1.65
   6  -5   1   76.15    2.42
  -6   5  -1   74.27    1.92
  -6  -5  -1   79.68    1.74
  -6  -5  -1   82.80    3.80
   1   8  -1   -0.13    0.23
  -1   8   1    0.10    0.17
  -1  -8   1    0.06    0.17
  -1  -8   1   -0.06    0.15
   1  -8  -1    0.13    0.16
  -1  -8   1   -0.39    0.44
   1   8  -1   -0.01    0.30
  -1   8   1   -0.05    0.26
   1   8  -1    0.18    0.26
  -1   8   1    0.02    0.16
  -1   8   1    0.03    0.26
   1  -8  -1   -0.29    0.50
  -1  -8   1   -0.34    0.67
   1   8  -1    0.04    0.17
   1  -8  -1   -0.03    0.37
   7   2   2    5.87    0.97
  -7  -2  -2    5.35    0.34
  -7   2  -2    5.50    0.34
  -7   2  -2    6.95    1.89
   7  -2   2    5.97    1.13
  -7   2  -2    5.66    0.76
  -7  -2  -2    5.98    1.88
   7  -2   2    7.77    1.49
   7  -2   2    5.53    0.36
  -7  -2  -2    5.28    0.98
   7   2   2    5.04    0.38
  -4  -4  -4  858.88   14.79
   4  -4   4  906.90   15.67
   4  -4   4  872.17   14.85
  -4   4  -4  868.34   15.62
  -4  -4  -4  866.15   14.80
   4  -4   4  902.39   14.97
  -4   4  -4  882.34   20.10
  -4  -4  -4  901.06   13.17
  -4   4  -4  892.78   12.94
   1   8   1   11.31    0.50
  -1  -8  -1   11.98    0.67
   1  -8   1   10.03    0.72
   1  -8   1   10.81    0.44
  -1   8  -1   10.89    0.54
  -1   8  -1   10.87    0.48
   1   8   1   10.98    0.51
  -1   8  -1    9.33    0.55
  -1  -8  -1   10.85    0.44
   1  -8   1   11.65    1.76
  -1  -8  -1   10.67    0.64
  -1   8  -1    9.92    0.55
   3  -7   2   80.24    1.68
  -3  -7  -2   80.60    1.81
   3  -7   2   79.46    2.33
  -3  -7  -2   82.90    1.87
  -3   7  -2   80.63    2.49
   3  -7   2   77.99    4.45
  -3  -7  -2   77.03    1.66
  -3   7  -2   78.86    1.95
  -3  -7  -2   81.24    2.03
  -3   7  -2   81.47    1.81
  -3  -7  -2   83.74    1.90
  -1  -7   3   17.25    0.63
   1   7  -3   17.14    0.66
  -1  -7   3   17.77    0.61
  -1   7   3   17.69    0.59
   1  -7  -3   18.89    0.88
  -1   7   3   18.07    0.66
   1  -7  -3   17.44    0.67
  -1  -7   3   18.94    1.08
   1   7  -3   17.32    0.76
   1   7  -3   17.58    0.77
   0  -6  -4   93.15    2.13
   0  -6   4   85.82    1.86
   0   6  -4   86.19    4.03
   0   6  -4   90.85    2.18
   0  -6   4   92.16    2.77
  -4  -7   1    7.99    0.47
   4  -7  -1    7.73    0.39
  -4   7   1    7.82    0.39
  -4  -7   1    7.53    0.40
   4   7  -1    8.61    0.43
  -4  -7   1    7.67    0.48
  -4  -7   1    7.55    1.71
   4  -7  -1    8.55    1.28
  -4   7   1    7.95    0.50
  -4  -7   1    7.73    0.55
   4  -7  -1    8.10    0.69
  -4   7   1    8.16    0.60
  -6   0   4  186.58    3.97
  -6   0   4  201.82    3.97
   6   0  -4  207.07    5.11
  -3   5  -4   63.10    4.00
   3  -5   4   69.74    2.51
  -3   5  -4   57.77    1.93
  -3   5  -4   60.86    1.40
  -3   5  -4   62.71    1.53
  -3  -5  -4   62.68    1.53
  -3  -5  -4   63.31    1.51
   3  -5   4   60.31    2.47
   5   5  -3   72.49    1.63
  -5   5   3   73.85    1.60
  -5   5   3   69.81    2.06
  -5   5   3   73.31    1.60
  -5  -5   3   69.62    1.76
  -5  -5   3   75.97    2.21
   5   5  -3   74.83    2.88
   5  -5  -3   69.42    2.30
  -5   5   3   72.54    1.79
  -5  -5   3   72.79    1.71
  -5  -5   3   72.61    1.68
   5  -5  -3   72.53    1.82
   5  -5  -3   69.51    1.64
  -6  -3  -3    0.28    0.15
  -6   3  -3    2.21    2.04
  -6  -3  -3    0.50    0.95
  -6   3  -3    0.25    0.29
   6  -3   3    0.20    0.18
  -6  -3  -3   -0.03    0.76
   6  -3   3   -0.56    0.88
   6  -3   3    1.11    0.93
  -6   3  -3    0.50    0.20
   6   3   3    0.25    0.18
  -6   3  -3    0.82    0.55
  -1  -7  -3    1.82    0.37
  -1   7  -3    0.29    0.50
  -1   7  -3    0.40    0.39
   1   7   3    0.25    0.23
  -1  -7  -3    0.37    0.37
   1  -7   3    0.17    0.19
   1  -7   3    0.13    0.63
   1  -7   3    0.43    0.53
   1  -7   3    0.42    0.24
  -1   7  -3    0.54    0.26
   2  -8   0  277.23    5.42
  -2   8   0  285.28    5.28
  -2   8   0  283.29    5.20
  -2  -8   0  285.62    5.27
  -2  -8   0  281.67    5.36
   2  -8   0  278.14    6.80
   2  -8   0  285.57    5.11
  -2   8   0  285.59    5.37
   2   8   0  280.89    5.08
  -2   8   0  291.89    5.27
  -2  -8   0  294.32    5.28
  -2  -8   0  280.14    5.48
   2   8   0  296.82    5.37
   1   6  -4    6.13    0.52
   1   6  -4    5.85    0.57
   1  -6  -4    5.49    0.49
   1  -6  -4    5.84    0.43
  -1   6   4    5.64    0.38
  -1  -6   4    6.05    0.41
  -1  -6   4    7.33    0.86
  -1   6   4    5.79    0.32
  -1  -6   4    5.84    0.36
   1   6  -4    5.59    0.42
  -1   6   4    5.16    0.36
   1   6  -4    5.79    0.37
  -7   3   2  124.80    2.56
  -7  -3   2  128.74    4.01
   7   3  -2  133.99    5.44
  -7  -3   2  114.99    2.76
  -7  -3   2  111.65    2.85
   7  -3  -2  111.10    2.36
  -7   3   2  124.12    2.97
   7  -3  -2  121.13    3.07
  -7  -3   2  129.90    3.52
  -7  -3   2  116.11    2.47
  -7   0   3   -0.11    0.42
  -7   0   3    0.14    0.24
  -7   0   3    0.08    0.45
   4  -2  -5   48.65    1.53
   4   2  -5   45.74    1.49
  -4  -2   5   47.42    1.31
  -4   2   5   40.74    1.13
   4   2  -5   46.81    1.61
  -4  -2   5   46.18    1.18
  -4  -2   5   47.63    1.24
  -4   2   5   46.60    1.21
   4  -2  -5   44.48    1.10
  -4   2   5   45.97    1.32
   4   2  -5   48.08    1.67
  -2   4   5    0.61    0.21
  -2   4   5    0.29    0.26
   2   4  -5    0.31    0.25
  -2   4   5    0.27    0.20
  -2  -4   5    0.51    0.26
   2  -4  -5    0.33    0.23
   2  -4  -5    0.33    0.40
   2  -4  -5    0.42    0.38
   2   4  -5    0.31    0.46
  -2  -4   5    0.27    0.75
  -4   7  -1  395.42    7.23
  -4  -7  -1  383.79    6.93
  -4   7  -1  381.92    7.51
  -4  -7  -1  392.15    7.04
   4  -7   1  394.58   11.41
  -4  -7  -1  417.10    8.52
  -4   7  -1  423.54    7.58
  -4  -7  -1  401.45    7.60
  -4  -7  -1  398.37    7.18
   4  -7   1  405.45    7.12
  -4   7  -1  397.86    7.02
  -6   1   4    3.32    0.35
  -6  -1   4    3.04    0.41
   6  -1  -4   -0.08    0.12
   6  -1  -4    3.38    0.38
  -6   1   4    2.98    0.52
  -6  -1   4    3.34    0.47
  -6   1   4    3.05    0.40
   6   1  -4    2.99    1.07
   6  -1  -4    3.23    0.88
   7   4   0  164.30    4.31
   7  -4   0  149.50    2.95
  -7  -4   0  152.05    6.00
  -7   4   0  144.01    3.81
  -7  -4   0  152.56    3.08
   7  -4   0  143.18    6.14
  -7   4   0  152.25    2.92
  -7  -4   0  150.20    2.94
  -7   4   0  142.06    3.06
   7  -4   0  152.18    3.87
  -1  -6  -4    6.60    0.43
   1  -6   4    6.45    0.36
   1  -6   4    6.92    0.96
  -1   6  -4    7.01    0.62
  -1  -6  -4    6.80    0.57
  -1   6  -4    6.78    0.46
   1  -6   4    6.11    0.38
  -1  -6  -4    6.38    0.47
  -1   6  -4    6.51    1.64
   1   6   4    7.04    0.41
  -1   6  -4    6.32    0.42
   4   0   5    0.24    0.15
  -4   0  -5    0.04    0.17
  -4   0  -5    0.13    0.23
  -4   0  -5    0.24    0.90
  -7  -1   3  228.53    4.86
  -7  -1   3  222.48    4.29
  -7   1   3  229.76    4.67
   7  -1  -3  233.09    6.70
   7   1  -3  215.32    6.86
  -7  -1   3  234.47    4.77
   8   0   0   79.64    1.81
   8   0   0   90.57    4.34
  -8   0   0   82.93    3.38
  -8   0   0   85.75    2.40
  -8   0   0   85.41    1.83
   4  -6  -3  148.18    3.00
  -4   6   3  146.03    2.82
  -4  -6   3  151.35    2.96
   4  -6  -3  145.86    3.52
  -4  -6   3  143.25    2.97
  -4   6   3  153.19    3.53
  -4   6   3  147.99    2.85
   4   6  -3  131.39    3.21
   4   6  -3  147.59    2.98
   4  -6  -3  150.66    3.15
  -4  -6   3  150.38    3.51
  -5  -6   2  145.91    3.34
  -5   6   2  149.74    2.95
  -5  -6   2  154.23    3.01
  -5  -6   2  145.60    2.96
  -5   6   2  150.79    2.89
   5  -6  -2  156.35    4.35
   5  -6  -2  150.96    3.01
   5  -6  -2  144.39    3.15
  -5  -6   2  158.63    3.46
  -5  -6   2  148.97    3.15
   5   6  -2  148.55    2.87
   2   8  -1   95.71    2.56
  -2   8   1  101.07    2.12
   2   8  -1  105.11    2.20
  -2  -8   1  105.41    2.46
   2  -8  -1  102.00    2.07
  -2   8   1  103.72    2.12
  -2  -8   1  106.56    2.16
  -2   8   1  103.57    2.25
   2  -8  -1  101.83    2.94
  -2  -8   1  101.17    3.12
  -2  -8   1  102.61    2.18
   2   8  -1   98.43    2.14
  -2   8   1  104.96    2.20
  -3   3  -5  154.44    5.04
  -3   3  -5  159.21    3.19
  -3  -3  -5  165.78    3.27
   3  -3   5  159.78    3.02
  -3  -3  -5  159.75    3.19
   3  -3   5  159.53    4.66
   3   3   5  155.07    2.96
  -3  -3  -5  161.50    3.17
  -3  -3  -5  161.19    4.41
  -3   3  -5  156.15    3.01
   7  -4  -1   81.55    1.83
  -7  -4   1   79.75    1.85
   7   4  -1   80.25    2.89
   7  -4  -1   81.23    4.13
  -7  -4   1   78.70    3.42
   7  -4  -1   80.88    2.38
  -7   4   1   82.31    1.93
  -7  -4   1   82.69    1.89
  -7   4   1   81.25    2.35
   5  -3   4   38.94    1.83
  -5  -3  -4   36.13    1.00
  -5  -3  -4   37.16    0.95
  -5  -3  -4   33.17    1.71
  -5   3  -4   37.48    1.04
   5  -3   4   36.33    0.93
  -5  -3  -4   37.41    1.03
  -5   3  -4   36.57    0.96
  -5   3  -4   37.69    3.17
  -5  -3  -4   36.51    1.90
  -5   3  -4   37.07    1.54
   5   3   4   38.17    1.07
   2   7  -3    0.09    0.26
   2   7  -3    0.31    0.32
  -2  -7   3   -0.04    0.18
  -2   7   3    0.19    0.22
   2   7  -3   -0.02    0.28
   2  -7  -3    0.38    0.31
   2  -7  -3    0.34    0.20
   2  -7  -3    0.46    0.49
  -2   7   3   -0.08    0.27
  -2  -7   3    0.06    0.23
  -2   7   3    0.16    0.14
   4  -1   5  111.87    2.21
  -4  -1  -5  112.96    3.67
  -4  -1  -5  119.51    2.51
  -4   1  -5  104.36    3.61
   4  -1   5  115.99    3.64
   4   1   5  114.78    2.28
  -4   1  -5  123.18    2.57
  -4   1  -5  118.86    3.55
  -4  -1  -5  111.54    2.25
  -4  -1  -5  107.58    2.23
  -4   1  -5  113.96    2.30
   2  -8   1  123.77    2.95
   2  -8   1  120.28    4.98
  -2  -8  -1  118.15    2.57
  -2   8  -1  118.48    2.37
  -2  -8  -1  114.79    2.28
  -2  -8  -1  121.00    2.60
   2  -8   1  116.71    2.29
  -2   8  -1  116.02    2.60
  -2   8  -1  119.64    2.56
   2   8   1  121.41    2.44
   2   8   1  120.87    2.39
  -2   8  -1  126.40    2.62
  -8   0   1   -0.34    0.22
   8   0  -1   -1.06    1.77
  -8   0   1    0.72    0.75
  -8   0   1   -0.02    0.31
   6  -5  -2   49.31    1.55
  -6   5   2   48.95    1.48
  -6  -5   2   45.66    1.75
  -6  -5   2   51.39    1.52
   6   5  -2   52.88    2.10
   6  -5  -2   50.08    1.30
  -6   5   2   50.24    1.20
  -6   5   2   48.95    1.24
   6  -5  -2   44.17    2.30
  -6  -5   2   50.48    1.55
  -8  -1   0   10.27    1.64
  -8  -1   0    7.96    0.43
  -8   1   0    8.18    0.68
  -8  -1   0    7.74    0.81
   8  -1   0    7.86    1.00
  -8   1   0    7.52    1.30
   8   1   0   10.55    1.63
  -8   1   0    8.38    0.43
  -6  -4   3    2.54    0.38
  -6  -4   3    2.59    0.60
   6  -4  -3    2.72    0.94
  -6  -4   3    2.98    0.44
  -6   4   3    3.30    0.46
  -6   4   3    2.50    0.27
   6   4  -3    2.58    1.59
   6  -4  -3    2.98    0.45
  -6   4   3    2.89    0.30
   2   6  -4  245.86    4.81
  -2  -6   4  244.23    4.50
  -2   6   4  247.14    4.49
   2   6  -4  245.97    4.89
  -2  -6   4  239.97    4.50
   2  -6  -4  254.24    5.02
  -2  -6   4  234.93    5.25
   2  -6  -4  233.21    4.38
  -2   6   4  230.69    4.44
  -2   4  -5   34.82    2.40
  -2  -4  -5   34.04    1.00
  -2  -4  -5   34.15    1.05
   2  -4   5   34.15    0.97
   2   4   5   36.18    1.03
  -2   4  -5   31.21    1.35
   2  -4   5   35.92    2.06
  -2   4  -5   33.99    0.95
   2  -4   5   33.86    0.89
   2   4   5   33.15    0.90
   0   0   6   14.43    0.54
   0   0  -6   14.92    0.64
   0   0   6   15.89    0.63
   0   0  -6   14.23    0.70
   0   0  -6   15.99    1.42
   8  -1  -1  230.04    5.70
  -8  -1   1  219.13    4.67
   8  -1  -1  231.58    8.27
  -8  -1   1  235.19    4.42
   8   1  -1  235.34    7.98
  -8   1   1  219.82    4.37
  -8   1   1  234.88    5.56
   8  -1  -1  197.83    3.81
  -8   1   1  227.37    4.23
  -8  -1   1  219.04    5.54
  -1   0   6  153.07    2.95
   1   0  -6  148.39    3.00
   1   0  -6  159.06    4.49
   1   0  -6  148.23    3.19
  -1   0   6  162.47    3.21
  -1   0   6  153.90    2.99
   0   8  -2   31.37    1.02
   0  -8   2   29.22    0.84
   0  -8  -2   30.35    1.01
   0  -8  -2   31.65    0.85
   0   8  -2   32.44    0.93
   0   8   2   32.04    0.88
   0  -8   2   33.52    0.97
   0  -8   2   33.91    2.81
   0  -8  -2   29.91    1.09
   0   8  -2   33.01    1.04
   0   8   2   32.69    0.93
   0   8   2   31.40    0.88
   0   8  -2   31.82    1.00
   0  -8   2   31.60    1.27
  -5  -5  -3  620.23   12.13
  -5  -5  -3  664.43   11.54
  -5   5  -3  637.52   11.10
  -5   5  -3  637.66   14.46
  -5   5  -3  659.08   11.36
   5  -5   3  628.31   13.83
  -5  -5  -3  683.60   11.90
  -5   5  -3  637.95   11.70
  -5  -5  -3  647.93   11.21
   2   7   3   50.55    1.23
   2  -7   3   47.84    1.13
   2  -7   3   46.64    1.75
  -2  -7  -3   48.83    1.24
  -2   7  -3   48.09    1.27
   2  -7   3   48.49    2.50
  -2  -7  -3   48.05    1.29
  -2   7  -3   47.55    2.05
  -6   2   4  225.01    4.29
  -6   2   4  217.77    4.24
  -6  -2   4  216.47    4.18
   6  -2  -4  218.67    5.15
   6   2  -4  208.56    5.69
   6  -2  -4  221.66    4.34
  -6  -2   4  219.60    4.44
  -6   2   4  223.11    4.63
  -7   3  -2   22.84    0.69
  -7   3  -2   22.46    1.07
   7  -3   2   21.20    0.68
   7  -3   2   22.47    2.13
  -7  -3  -2   19.51    2.35
   7  -3   2   21.46    1.60
  -7  -3  -2   21.07    1.46
  -7  -3  -2   22.28    0.70
   7  -4   1   18.99    0.65
  -7  -4  -1   18.71    0.64
  -7   4  -1   17.03    0.87
   7  -4   1   18.92    1.35
  -7  -4  -1   18.28    0.68
  -7  -4  -1   17.04    2.22
   7  -4   1   20.54    2.79
  -7   4  -1   17.86    0.60
   4   5  -4   20.97    0.82
  -4  -5   4   21.42    1.27
  -4  -5   4   22.22    0.81
   4   5  -4   22.88    2.46
  -4   5   4   21.38    0.78
  -4   5   4   21.02    0.67
   4  -5  -4   21.45    1.07
  -4  -5   4   22.03    0.73
   4   5  -4   21.26    1.07
  -4   5   4   22.51    0.96
   4  -5  -4   22.56    0.82
  -5   6  -2   32.59    0.92
   5  -6   2   29.47    2.92
  -5  -6  -2   30.11    0.85
  -5  -6  -2   31.35    0.91
  -5  -6  -2   29.11    1.51
  -5   6  -2   29.04    1.79
  -5  -6  -2   27.13    0.85
  -5   6  -2   29.34    1.12
   5  -6   2   30.23    1.46
  -5  -6  -2   31.48    0.93
   5  -6   2   32.54    0.82
  -5   6  -2   29.87    0.84
   5  -4  -4   13.28    0.63
  -5  -4   4   13.52    0.58
   5   4  -4   14.27    0.62
  -5   4   4   13.83    0.78
  -5  -4   4   13.22    0.55
  -5   4   4   15.01    0.66
  -5  -4   4   13.44    0.65
  -5  -4   4   12.25    1.19
  -5   4   4   13.24    0.53
   5   4  -4   12.16    1.70
   0   1  -6   70.11    2.55
   0   1  -6   70.45    1.51
   0  -1  -6   71.19    2.69
   0   1   6   70.59    1.44
   0   1   6   73.73    1.55
   0   1   6   70.88    1.41
   0  -1   6   73.54    1.45
   0  -1  -6   68.44    1.63
   0   1  -6   70.47    1.65
   0  -1  -6   70.81    1.54
  -7  -2   3  180.06    3.63
  -7   2   3  146.19    2.60
  -7  -2   3  158.51    2.85
  -7   2   3  171.39    3.27
  -7  -2   3  173.10    3.38
   7   2  -3  155.84    5.85
  -7   2   3  150.34    3.24
   7  -2  -3  171.83    4.93
   7  -2  -3  164.31    3.50
  -8   0  -1   -0.00    1.56
   8   0   1    0.93    1.22
  -8   0  -1   -0.24    0.47
  -8   0  -1    0.07    0.20
   8   0   1    0.13    0.25
  -4  -6  -3    0.60    0.27
  -4  -6  -3    0.73    0.21
  -4   6  -3   -0.01    1.07
  -4  -6  -3    0.53    0.29
   4  -6   3    0.24    1.24
  -4   6  -3    0.74    0.25
  -4  -6  -3    0.74    0.23
  -4  -6  -3    0.77    0.19
  -4   6  -3    0.59    0.43
   4  -6   3    0.72    0.19
  -4   6  -3    0.74    0.23
   4  -6   3    0.68    0.71
   1  -8  -2   12.53    0.82
   1   8  -2   13.30    0.62
  -1   8   2   13.18    0.55
   1   8  -2   12.69    0.55
  -1  -8   2   12.66    0.48
  -1   8   2   12.81    0.51
  -1  -8   2   11.41    0.49
   1   8  -2   13.30    0.69
  -1   8   2   13.13    0.50
   1  -8  -2   12.05    0.47
  -1  -8   2   13.78    0.85
  -1  -8   2   13.60    1.73
  -1   1   6    1.35    0.23
  -1   1   6    1.05    0.25
   1   1  -6    1.34    0.30
   1  -1  -6    1.58    0.33
  -1   1   6    1.02    0.26
   1   1  -6    0.80    0.34
   1  -1  -6    0.49    0.75
   1  -1  -6    0.87    0.34
   1   1  -6    0.72    0.76
  -1  -1   6    0.95    0.20
   2  -6   4   24.44    0.68
   2   6   4   24.92    0.73
  -2  -6  -4   24.36    0.80
   2  -6   4   24.08    1.45
  -2  -6  -4   23.27    0.71
  -2   6  -4   23.55    2.31
  -2  -6  -4   23.62    0.86
  -2   6  -4   23.08    0.71
   2  -6   4   25.32    0.79
  -2   6  -4   24.91    0.82
  -1   8  -2   24.84    0.74
   1  -8   2   24.62    1.14
   1   8   2   24.73    0.74
   1  -8   2   23.25    0.66
  -1  -8  -2   22.24    0.85
  -1  -8  -2   23.25    0.65
   1  -8   2   22.68    2.56
  -1   8  -2   22.97    0.90
  -1  -8  -2   24.79    0.88
  -1   8  -2   25.45    0.82
   1   8   2   22.66    0.74
  -4   7   2  443.00    6.62
   4  -7  -2  450.29    8.16
  -4  -7   2  440.35    6.66
  -4  -7   2  435.82    6.80
   4  -7  -2  442.43    6.75
  -4   7   2  455.06    7.08
  -4  -7   2  459.90    7.46
   4  -7  -2  437.55    7.00
   4   7  -2  441.30    6.69
  -4   7   2  437.76    6.63
  -1   0  -6  164.70    2.90
  -1   0  -6  168.59    2.92
   1   0   6  166.38    2.85
  -1   0  -6  169.58    3.06
  -1   0  -6  166.93    4.41
   1   0   6  170.31    2.81
   4  -2   5  229.49    3.62
  -4  -2  -5  227.12    3.72
  -4   2  -5  236.71    3.93
  -4  -2  -5  213.57    5.23
  -4   2  -5  222.90    6.04
  -4   2  -5  224.48    3.61
   4   2   5  222.23    3.55
  -4   2  -5  228.00    4.90
  -4  -2  -5  220.35    4.75
  -4  -2  -5  231.25    3.83
   4  -2   5  220.91    5.39
  -4  -2  -5  225.30    3.62
  -6   5  -2   92.71    1.73
  -6  -5  -2   93.58    1.79
  -6  -5  -2   91.01    1.75
  -6   5  -2   92.01    3.40
   6  -5   2   94.65    4.38
  -6  -5  -2   83.54    3.14
  -6  -5  -2   92.34    1.75
  -6   5  -2   88.84    2.12
   6  -5   2   96.82    2.94
   6  -5   2   92.91    1.72
   8   1   1   17.85    0.66
  -8  -1  -1   19.11    0.62
   8  -1   1   20.81    0.73
  -8   1  -1   18.83    0.61
   8   1   1   20.34    1.69
  -8  -1  -1   17.48    2.50
   8  -1   1   18.86    1.40
  -8  -1  -1   20.76    1.33
  -8   1  -1   18.80    1.05
  -8   1  -1   19.23    2.15
   4  -3  -5  196.66    3.26
  -4   3   5  204.80    3.44
  -4  -3   5  195.46    3.40
  -4   3   5  211.71    3.63
   4   3  -5  204.47    3.96
   4  -3  -5  203.35    3.81
   4   3  -5  202.24    3.83
  -4   3   5  204.24    3.61
  -4  -3   5  199.95    4.92
  -4  -3   5  187.74    3.15
   3   4  -5   13.81    0.74
  -3  -4   5   11.50    1.20
  -3   4   5   13.72    0.58
  -3   4   5   13.51    0.58
   3   4  -5   14.46    0.79
   3  -4  -5   13.10    0.54
  -3  -4   5   13.56    0.60
  -3   4   5   12.98    0.61
  -8   2   0   46.57    1.06
   8   2   0   45.31    2.44
   8  -2   0   42.22    2.10
  -8   2   0   41.13    1.31
  -8  -2   0   46.25    2.02
  -8  -2   0   45.04    1.10
  -8   2   0   45.32    2.15
  -8  -2   0   44.68    2.89
   3  -8   0   60.15    2.76
   3   8   0   61.32    1.27
  -3  -8   0   61.82    1.39
  -3  -8   0   60.17    1.26
  -3   8   0   60.63    1.52
  -3  -8   0   59.83    1.45
   3  -8   0   60.49    1.24
  -3   8   0   60.39    1.26
  -3   8   0   60.99    1.34
  -3  -8   0   60.70    1.49
  -3   8   0   59.09    1.38
   5   0  -5    0.35    0.54
   5   0  -5   -0.05    0.16
   5   0  -5   -0.32    0.55
  -5   0   5    0.21    0.26
  -7   0  -3   -1.31    1.62
  -7   0  -3   -0.11    0.18
   7   0   3   -0.24    0.19
   7   0   3    0.52    0.75
  -7   0  -3   -0.50    0.70
   6   0   4   62.10    1.29
  -6   0  -4   62.29    2.42
  -6   0  -4   62.89    1.28
  -6   0  -4   59.89    3.17
  -6   0  -4   65.92    1.44
  -1   1  -6   12.70    0.62
   1   1   6   12.10    0.52
  -1   1  -6   13.31    0.58
   1  -1   6   12.00    0.51
   1  -1   6   12.27    0.47
   1   1   6   12.46    0.47
  -1  -1  -6   12.83    0.62
  -1   1  -6   12.61    1.22
  -1   1  -6   12.32    0.54
  -1  -1  -6   10.09    1.20
  -1  -1  -6   12.97    0.58
   2   0  -6    5.13    0.46
  -2   0   6    5.39    0.41
  -2   0   6    4.91    0.34
   2   0  -6    5.23    1.06
   2   0  -6    5.06    0.55
  -2   0   6    5.33    0.36
  -8   2   1   28.52    1.43
   8  -2  -1   28.37    1.68
  -8  -2   1   31.62    0.92
  -8   2   1   30.85    0.83
  -8  -2   1   29.08    1.39
  -8  -2   1   31.50    1.93
   8   2  -1   31.11    2.67
  -8   2   1   29.18    0.96
  -8  -2   1   30.84    0.82
   8  -2  -1   29.86    0.88
   0   5  -5   28.00    0.81
   0  -5  -5   30.71    1.15
   0   5   5   22.79    0.66
   0   5   5   28.03    0.74
   0  -5   5   31.18    1.78
   0   5  -5   29.10    1.14
   0   5  -5   30.90    2.34
   0   5   5   28.50    0.81
   0   5  -5   30.26    0.91
   0  -5  -5   29.11    0.93
   0  -5  -5   29.19    0.80
   0  -5   5   28.53    0.82
   0   5   5   28.79    0.82
   0   5  -5   29.39    0.96
   5  -1  -5   34.63    1.84
   5  -1  -5   33.73    0.87
  -5  -1   5   34.79    1.07
   5  -1  -5   36.10    1.40
  -5   1   5   35.62    0.98
  -5  -1   5   36.83    0.98
   5   1  -5   33.93    1.34
  -5   1   5   33.38    0.93
  -5   1   5   35.00    1.10
   5   1  -5   34.72    1.37
  -7  -1  -3  111.90    4.68
  -7   1  -3  110.52    5.06
  -7   1  -3  112.20    2.00
  -7  -1  -3  112.97    2.00
  -7   1  -3  110.92    2.98
  -7  -1  -3  115.61    3.47
   7  -1   3  109.17    3.37
   7   1   3  117.74    2.19
   7  -1   3  115.45    2.08
   7  -1   3  112.79    3.33
  -6  -1  -4    3.15    1.05
  -6   1  -4    2.35    0.27
  -6   1  -4    3.38    0.86
  -6   1  -4    2.77    0.32
   6   1   4    2.13    0.26
  -6  -1  -4    1.20    1.24
   6  -1   4    1.72    0.88
   6  -1   4    2.49    0.26
  -6  -1  -4    2.21    0.26
  -6  -1  -4    2.24    0.32
   1  -5  -5   48.74    1.12
  -1   5   5   48.70    1.14
   1  -5  -5   47.76    1.60
   1   5  -5   50.23    1.20
   1  -5  -5   49.02    1.28
   1   5  -5   48.86    1.21
  -1   5   5   46.06    1.05
   1   5  -5   50.08    1.51
  -1  -5   5   45.91    2.12
   1   5  -5   45.94    2.44
  -1  -5   5   50.37    1.21
   1   5  -5   49.57    1.34
  -1   5   5   49.50    1.18
  -1   5   5   51.50    1.21
  -6   6   0   41.02    0.95
  -6  -6   0   43.04    1.03
  -6   6   0   43.24    1.58
   6  -6   0   36.76    3.00
   6  -6   0   40.18    0.97
   6  -6   0   41.60    1.51
  -6  -6   0   35.65    1.33
  -6   6   0   38.93    1.12
  -6  -6   0   42.48    1.11
  -6  -6   0   42.18    3.15
   6  -4   3   97.34    3.48
  -6  -4  -3  101.78    1.85
  -6   4  -3   90.83    4.38
   6  -4   3   97.13    3.16
  -6  -4  -3   96.23    1.83
  -6   4  -3   93.77    2.34
   6  -4   3   91.49    1.70
  -6   4  -3   99.01    1.81
  -6  -4  -3   81.16    2.94
  -4  -7  -2    0.27    0.22
  -4  -7  -2    0.24    0.14
   4  -7   2    0.21    1.75
  -4   7  -2    0.36    0.21
  -4  -7  -2    0.23    0.17
  -4  -7  -2   -0.11    0.27
  -4   7  -2    0.13    0.36
  -4  -7  -2    0.17    0.18
  -4   7  -2    1.00    0.67
   4  -7   2    0.42    0.20
  -3  -8   1   92.67    1.85
   3   8  -1   93.26    1.77
  -3  -8   1   92.63    2.36
   3  -8  -1   87.80    2.04
   3  -8  -1   94.68    2.92
  -3   8   1   93.02    1.72
   3  -8  -1   93.26    1.73
  -3  -8   1   88.21    2.90
  -3  -8   1   92.94    2.06
  -3   8   1   89.97    1.79
  -3  -8   1   88.43    1.67
  -3   8   1   97.32    2.00
   2   1  -6  135.91    3.59
  -2  -1   6  127.78    2.27
   2   1  -6  134.11    2.76
  -2   1   6  134.89    2.48
   2  -1  -6  141.10    2.94
   2  -1  -6  134.23    2.54
  -2   1   6  135.06    2.40
   2   1  -6  133.76    2.51
   2  -1  -6  128.73    3.78
  -2   1   6  128.68    2.29
  -2  -1   6  131.92    2.32
   7   4  -2    9.94    1.36
   7  -4  -2   11.92    0.77
   7  -4  -2   11.05    0.55
  -7   4   2   10.99    0.47
  -7   4   2   11.54    0.81
  -7  -4   2   10.43    0.64
   7  -4  -2   11.48    1.81
  -7  -4   2   10.63    0.96
  -7  -4   2   10.24    0.78
  -7   4   2   11.33    0.54
   0   2   6  142.75    2.44
   0  -2   6  142.54    3.93
   0  -2  -6  136.50    2.51
   0  -2  -6  141.76    3.90
   0   2  -6  138.12    2.64
   0   2  -6  142.16    2.55
   0   2   6  142.00    2.48
   0   2  -6  139.28    2.55
   0  -2   6  128.84    2.35
   0  -2   6  149.02    2.53
   0   2   6  142.41    2.53
   0  -2  -6  143.41    2.79
   0   2  -6  146.97    3.59
   3   7  -3    4.27    0.52
  -3  -7   3    3.58    0.31
  -3   7   3    3.40    0.37
   3  -7  -3    3.32    0.44
   3  -7  -3    3.07    0.63
  -3  -7   3    3.11    0.55
  -3   7   3    3.79    0.45
   3  -7  -3    3.58    0.33
  -3   7   3    3.41    0.27
   3   7  -3    4.39    0.44
  -3   7   3    3.70    0.31
  -3  -7   3    4.20    0.36
   8   0  -2    0.98    1.89
  -8   0   2    0.04    0.65
  -8   0   2   -0.32    0.24
   2   8  -2  148.40    2.67
  -2  -8   2  152.04    2.76
  -2   8   2  154.01    2.61
  -2   8   2  158.01    2.65
  -2  -8   2  155.49    2.62
  -2  -8   2  154.01    3.16
   2   8  -2  155.22    2.76
   2  -8  -2  151.33    3.26
   2   8  -2  156.84    3.22
   2  -8  -2  143.66    2.55
  -2   8   2  154.87    2.75
  -1   2   6   62.77    1.32
   1  -2  -6   66.81    2.53
   1   2  -6   65.43    2.16
   1  -2  -6   62.25    1.65
   1   2  -6   63.46    1.59
  -1   2   6   64.90    1.43
  -1   2   6   63.71    1.35
   1  -2  -6   61.33    1.44
  -1  -2   6   64.26    1.32
   1   2  -6   65.23    1.45
  -1  -2   6   60.93    1.37
   3  -6  -4   45.41    1.44
  -3   6   4   43.86    1.00
  -3  -6   4   44.06    1.13
  -3   6   4   40.69    1.17
   3   6  -4   43.78    1.43
   3   6  -4   42.33    1.19
   3  -6  -4   42.91    1.12
  -3  -6   4   42.26    1.66
  -3  -6   4   42.34    1.00
  -3  -8  -1    8.77    0.40
   3  -8   1    6.36    1.79
  -3  -8  -1    9.73    0.55
  -3   8  -1    8.36    0.56
  -3   8  -1    8.81    0.42
  -3   8  -1    8.48    0.65
  -3  -8  -1   11.81    0.70
   3  -8   1    8.85    0.77
  -3   8  -1    8.65    0.43
   3  -8   1    9.29    0.41
  -4  -5  -4  206.92    3.46
  -4   5  -4  203.90    6.98
  -4   5  -4  207.48    4.11
   4  -5   4  221.61    5.10
  -4   5  -4  191.36    3.26
  -4  -5  -4  214.36    3.60
   4  -5   4  203.13    4.90
  -4   5  -4  212.20    3.44
  -5   7   0    0.82    0.54
   5  -7   0   -0.30    1.35
  -5  -7   0   -0.00    0.17
  -5  -7   0   -0.01    0.25
  -5   7   0    0.33    0.21
  -5   7   0    0.52    0.32
   5  -7   0   -0.19    0.17
   5  -7   0    0.24    0.49
  -5  -7   0   -1.29    0.89
  -5  -7   0   -0.01    0.33
  -5  -7   0    0.16    0.20
  -1   5  -5   72.64    1.96
  -1   5  -5   75.04    3.77
  -1   5  -5   72.75    1.49
   1   5   5   69.64    1.46
  -1  -5  -5   75.01    1.63
   1  -5   5   67.57    2.60
  -1   5  -5   74.33    1.55
   1  -5   5   69.74    1.45
  -1  -5  -5   69.78    1.69
  -1   5  -5   71.25    1.60
   6  -6  -1   -0.33    1.31
  -6  -6   1    0.46    0.19
  -6  -6   1    0.49    0.24
  -6   6   1    0.34    0.49
  -6   6   1    0.83    0.31
  -6   6   1    0.58    0.20
  -6  -6   1    1.93    1.24
  -6  -6   1    0.54    0.34
  -6  -6   1    0.90    0.34
   6  -6  -1    0.63    0.48
   6  -6  -1    1.35    0.25
  -8  -1   2    0.31    0.58
   8  -1  -2    0.79    1.76
   8   1  -2    1.20    1.88
  -8   1   2   -0.04    0.18
  -8   1   2   -0.05    0.23
  -8   1   2   -0.12    0.49
  -8  -1   2    0.30    0.27
  -8   2  -1   97.98    2.37
   8  -2   1   98.77    1.92
  -8   2  -1  104.76    1.90
  -8  -2  -1  100.27    1.86
   8  -2   1  101.34    3.28
  -8  -2  -1   96.66    3.09
   8   2   1  103.64    3.23
   8  -2   1   96.42    4.31
  -8  -2  -1  105.20    4.83
  -8   2  -1   97.05    3.77
  -2   8  -2    0.40    0.22
  -2  -8  -2    0.55    0.32
  -2   8  -2    0.32    0.21
   2  -8   2    0.12    0.19
   2   8   2    0.10    0.22
  -2  -8  -2    0.20    0.14
   2  -8   2   -0.42    0.53
  -2   8  -2    0.49    0.34
  -2   8  -2    0.37    0.44
   2  -8   2    0.37    1.66
  -6  -3   4   21.30    0.87
   6  -3  -4   21.72    0.83
   6   3  -4   22.99    0.68
  -6   3   4   24.12    0.77
   6   3  -4   20.69    1.98
  -6   3   4   25.16    1.07
  -6  -3   4   23.22    0.80
  -6   3   4   23.28    0.83
   6  -3  -4   22.11    1.36
  -3  -4  -5  255.92    4.22
   3  -4   5  252.82    5.99
   3   4   5  254.36    4.15
   3  -4   5  261.21    4.11
  -3   4  -5  250.60    4.00
  -3  -4  -5  254.61    4.15
  -3   4  -5  256.60    7.41
   1   2   6   16.01    0.59
  -1  -2  -6   16.31    1.36
  -1   2  -6   18.52    0.68
  -1   2  -6   17.60    0.64
  -1   2  -6   17.08    1.25
  -1   2  -6   18.33    0.74
  -1   2  -6   17.61    1.20
  -1  -2  -6   16.82    0.72
   1  -2   6   15.60    1.36
   1   2   6   16.42    0.55
   1  -2   6   16.93    0.56
   2   0   6   36.22    0.86
   2   0   6   36.40    0.95
  -2   0  -6   34.28    1.90
  -2   0  -6   39.05    1.09
  -2   0  -6   37.74    1.00
  -2   0  -6   37.94    1.01
  -5  -4  -4   29.79    0.77
  -5  -4  -4   30.62    0.87
   5  -4   4   30.76    0.78
  -5  -4  -4   30.38    1.54
  -5   4  -4   28.20    1.24
  -5  -4  -4   28.80    0.82
  -5   4  -4   30.63    0.81
  -5   4  -4   27.52    2.86
   5  -4   4   31.75    1.71
  -5   7   1    8.79    0.53
   5  -7  -1    9.46    1.62
  -5   7   1    9.11    0.70
  -5  -7   1    9.37    0.60
   5  -7  -1    9.67    0.71
  -5  -7   1    9.07    1.81
  -5  -7   1    9.28    0.46
  -5  -7   1    9.45    0.46
   5  -7  -1    9.02    0.44
   5   7  -1    9.70    0.44
  -5   7   1    9.01    0.46
  -5  -7   1    9.01    0.55
   7   3  -3  225.99    7.52
  -7  -3   3  223.80    4.08
   7  -3  -3  198.80    5.23
  -7   3   3  225.61    4.00
  -7   3   3  233.01    3.79
  -7  -3   3  232.77    4.31
   7  -3  -3  231.08    4.34
  -5  -2   5   26.25    0.90
   5   2  -5   26.99    1.23
   5  -2  -5   28.59    0.82
  -5   2   5   29.02    0.89
  -5  -2   5   27.22    0.83
  -5  -2   5   29.35    0.87
  -5   2   5   27.75    0.86
   5   2  -5   30.03    1.35
   5  -2  -5   28.74    1.22
   5   2  -5   28.65    1.10
  -5   2   5   28.82    0.99
  -3  -7  -3    2.15    0.33
  -3   7  -3    1.45    0.27
  -3   7  -3    1.75    0.47
   3  -7   3    2.81    1.31
  -3  -7  -3    1.51    0.25
  -3   7  -3    1.70    0.84
   3  -7   3    1.65    0.74
   3  -7   3    1.77    0.22
  -2  -5   5   19.86    1.44
   2   5  -5   21.76    0.91
   2   5  -5   22.65    0.95
  -2   5   5   21.51    0.75
  -2  -5   5   21.32    0.73
   2  -5  -5   20.38    0.86
  -2   5   5   20.80    0.69
   2   5  -5   20.43    0.77
   2   5  -5   21.75    1.52
  -2   5   5   21.14    0.66
  -2  -5   5   21.12    0.65
   2  -5  -5   20.97    0.68
   7  -2   3  542.71   13.93
  -7  -2  -3  532.10   11.77
   7  -2   3  525.93    9.85
  -7   2  -3  543.97   13.92
  -7   2  -3  522.24    8.85
   7   2   3  536.02   13.85
  -7  -2  -3  531.26    9.93
   7  -2   3  523.73   10.00
  -7  -2  -3  550.27   14.08
   6  -6   1    4.37    0.31
   6  -6   1    4.08    0.74
  -6  -6  -1    5.06    0.39
  -6   6  -1    4.46    0.47
  -6  -6  -1    4.53    0.38
  -6   6  -1    4.46    0.84
  -6  -6  -1    4.51    0.33
  -6  -6  -1    5.20    1.15
   6  -6   1    4.02    2.19
  -6   2  -4  131.23    2.39
  -6   2  -4  128.56    3.20
  -6  -2  -4  128.60    2.22
  -6  -2  -4  111.37    3.64
  -6   2  -4  120.43    5.10
  -6   2  -4  128.25    2.23
  -6  -2  -4  131.09    2.38
  -6  -2  -4  118.54    3.59
   6  -2   4  131.93    2.27
   6  -2   4  137.65    3.63
   6  -2   4  122.87    3.66
   6   2   4  130.10    2.35
  -7  -5   0    0.74    0.30
   7  -5   0    0.65    2.12
  -7  -5   0    0.45    0.26
   7  -5   0    0.60    0.24
  -7  -5   0   -0.53    1.27
   7  -5   0    0.49    0.66
   2  -1   6   71.86    1.49
   2   1   6   71.94    1.50
  -2   1  -6   72.39    1.51
  -2   1  -6   76.31    2.43
  -2  -1  -6   73.33    1.54
   2  -1   6   72.22    1.40
  -2  -1  -6   74.11    2.80
  -2   1  -6   76.08    2.67
  -2   1  -6   74.67    1.56
  -2  -1  -6   71.25    1.54
  -2  -1  -6   73.52    1.63
  -2   1  -6   75.69    1.66
   2   1   6   71.12    1.39
   2  -2  -6    1.15    0.45
  -2  -2   6    1.14    0.22
  -2   2   6    0.94    0.29
  -2  -2   6    1.02    0.28
   2   2  -6    1.22    0.30
   2   2  -6    0.88    0.59
   2  -2  -6    2.13    0.87
  -2  -2   6    1.57    0.26
  -2   2   6    1.02    0.22
   2  -2  -6    1.33    0.39
  -2   2   6    1.51    0.28
   2   2  -6    1.37    0.41
   4   3   5  171.78    4.60
   4  -3   5  179.35    6.07
  -4   3  -5  182.68    5.48
  -4  -3  -5  179.44    5.85
  -4   3  -5  183.90    4.91
  -4   3  -5  196.57    5.31
   4  -3   5  182.67    4.83
  -4  -3  -5  182.37    4.87
  -4  -3  -5  187.72    5.08
  -4   3  -5  177.95    6.78
  -4  -3  -5  186.58    5.02
  -8  -3   0   12.02    0.59
  -8   3   0   10.16    0.65
  -8  -3   0   12.22    0.55
  -8  -3   0    9.26    1.76
  -8  -3   0    8.99    1.08
   8  -3   0   10.34    1.12
   8  -3   0   12.02    0.61
  -8   3   0    9.67    1.14
   8  -3   0   11.68    2.63
   8   3   0   12.02    1.23
  -8   3   0   11.79    0.55
  -5  -7  -1   14.05    0.69
  -5   7  -1   13.65    0.74
  -5  -7  -1   13.86    0.87
   5  -7   1   14.94    1.13
   5  -7   1   15.10    0.62
  -5   7  -1   14.18    0.60
  -5  -7  -1   14.40    0.63
  -5  -7  -1   12.92    1.21
  -5  -7  -1   14.88    0.65
  -5   7  -1   14.66    1.05
   5  -7   1   12.20    2.33
  -7  -4  -2  145.75    4.92
  -7   4  -2  147.95    3.97
  -7  -4  -2  147.89    4.01
  -7   4  -2  141.92    4.21
  -7   4  -2  145.26    5.60
   7  -4   2  154.49    5.24
   7  -4   2  158.64    6.37
  -7  -4  -2  141.05    5.76
   3  -6   4    2.29    0.82
  -3   6  -4    1.19    0.50
  -3  -6  -4    1.69    0.31
  -3   6  -4    1.22    0.29
  -3  -6  -4    1.45    0.27
  -3   6  -4    1.28    0.25
   3  -6   4    0.97    0.71
  -3  -6  -4    1.86    0.35
   3  -6   4    1.25    0.23
  -3   6  -4    2.87    1.41
   3   0  -6  142.60    4.05
  -3   0   6  135.26    3.70
  -3   0   6  145.58    3.98
   3   0  -6  135.71    4.71
   3   0  -6  140.41    4.22
  -3   0   6  140.67    3.91
   5  -6  -3  202.54    5.57
  -5  -6   3  214.88    5.73
  -5   6   3  208.74    5.52
   5  -6  -3  208.12    5.61
  -5   6   3  198.65    5.72
  -5  -6   3  205.85    5.61
  -5   6   3  220.10    5.80
   5   6  -3  211.46    5.62
   5  -6  -3  219.67    6.59
  -5  -6   3  210.01    5.99
   7  -5  -1    1.29    1.79
  -7   5   1    1.64    0.59
   7  -5  -1    1.79    0.29
  -7   5   1    1.68    0.25
  -7  -5   1    2.38    0.52
  -7  -5   1    1.43    0.30
   7  -5  -1    1.65    0.53
  -7   5   1    1.45    0.32
  -7  -5   1    1.66    0.33
  -7  -5   1    1.41    1.04
   8   0   2   87.01    2.53
  -8   0  -2   79.40    2.99
  -8   0  -2   67.21    4.32
  -8   0  -2   79.22    2.26
  -8   2   2   22.52    1.21
   8  -2  -2   22.36    2.70
   8   2  -2   24.33    2.84
  -8  -2   2   24.95    0.98
  -8   2   2   22.63    0.85
  -8   2   2   23.23    0.88
  -8  -2   2   23.90    1.36
   8  -2  -2   22.83    1.54
   8  -3  -1    6.80    0.93
   8  -3  -1    7.02    0.48
  -8   3   1    6.31    0.39
  -8  -3   1    6.96    0.49
  -8  -3   1    6.19    0.41
  -8   3   1    6.64    0.50
  -8  -3   1    6.34    1.18
  -8   3   1    7.39    0.91
   8   3  -1    7.97    1.34
  -8  -3   1    5.87    0.94
  -6   5   3    2.56    0.46
  -6  -5   3    3.13    0.35
   6  -5  -3    3.87    0.98
  -6  -5   3    3.22    0.43
  -6   5   3    3.37    0.30
   6   5  -3    3.13    0.93
   6  -5  -3    2.80    0.45
  -6  -5   3    3.02    0.37
  -6  -5   3    3.44    0.54
   6  -5  -3    3.48    0.36
   6   5  -3    3.50    0.30
  -6   5   3    2.99    0.31
   5   0   5   -0.08    0.16
  -5   0  -5   -0.03    0.23
  -5   0  -5   -0.04    0.20
  -5   0  -5   -0.31    0.89
   3  -1  -6    5.67    0.53
  -3   1   6    6.33    0.46
  -3   1   6    5.38    0.41
   3  -1  -6    5.31    0.96
  -3  -1   6    5.29    0.39
  -3  -1   6    5.78    0.40
   3   1  -6    5.06    0.83
   3  -1  -6    5.90    0.66
   3   1  -6    4.83    0.63
  -3   1   6    4.65    0.37
   3   1  -6    5.76    0.52
  -2  -5  -5  140.20    3.95
   2  -5   5  137.03    3.69
   2  -5   5  139.38    4.89
  -2   5  -5  135.31    4.08
  -2   5  -5  121.31    3.44
  -2  -5  -5  142.56    3.94
  -2   5  -5  143.17    3.90
   2  -5   5  144.17    3.95
  -2   5  -5  147.30    6.60
   0  -3   6  193.01    5.17
   0  -3   6  181.89    6.02
   0   3   6  201.44    5.39
   0  -3  -6  197.15    5.47
   0   3  -6  198.11    5.85
   0   3  -6  201.17    5.40
   0  -3   6  203.42    5.37
   0   3   6  198.68    5.26
   0   3  -6  195.81    5.29
   0   3   6  204.65    5.44
   0   3  -6  202.59    5.54
   0  -3  -6  202.83    6.41
   0   3  -6  219.49    6.64
  -8  -1  -2  576.22   14.74
   8  -1   2  571.07   14.69
   8   1   2  568.60   15.72
   8  -1   2  531.50   15.37
  -8  -1  -2  524.39   16.81
   8  -1   2  559.88   15.62
  -8   1  -2  536.25   14.41
  -8  -1  -2  554.57   15.32
  -8   1  -2  533.14   16.70
  -8   1  -2  568.90   14.55
   8   1   2  556.75   14.38
  -4  -4   5    0.45    0.28
   4  -4  -5    0.14    0.26
  -4   4   5    0.20    0.29
  -4  -4   5   -0.08    0.75
  -4   4   5    0.32    0.22
   4   4  -5    0.32    0.47
   4   4  -5   -0.05    0.33
  -4  -4   5    0.41    0.19
  -4  -4   5    0.51    0.22
  -4   4   5    0.39    0.27
   0  -7  -4   30.45    1.19
   0  -7   4   30.52    1.62
   0   7   4   30.27    1.05
   0  -7   4   30.37    1.01
   0   7  -4   32.28    1.87
   0   7  -4   28.27    1.11
   0  -7   4   28.72    1.01
   0   7  -4   29.37    1.02
   0   7  -4   29.11    1.20
  -1  -3   6   47.69    1.46
  -1   3   6   47.65    1.52
  -1  -3   6   45.97    1.48
  -1  -3   6   48.24    2.42
   1   3  -6   48.75    1.58
   1   3  -6   47.99    1.67
  -1   3   6   48.11    1.51
   1  -3  -6   46.80    1.74
   1   3  -6   46.90    1.93
  -1   3   6   47.23    1.47
  -5  -1  -5   45.38    2.31
  -5   1  -5   45.25    1.46
  -5   1  -5   48.61    2.29
  -5  -1  -5   45.00    2.36
   5   1   5   46.31    1.42
   5  -1   5   47.22    1.43
  -5   1  -5   48.36    1.49
  -5  -1  -5   45.95    1.42
  -5   1  -5   44.95    2.73
  -5  -1  -5   44.68    1.44
  -5  -1  -5   45.59    1.44
  -3   8   2  160.96    4.42
  -3  -8   2  157.25    4.22
  -3  -8   2  158.56    4.34
   3  -8  -2  157.75    4.89
   3   8  -2  143.46    4.37
   3  -8  -2  158.44    4.47
  -3  -8   2  170.70    4.91
   3  -8  -2  164.34    4.43
  -3   8   2  167.28    4.46
  -3   8   2  153.96    4.15
   3   8  -2  163.25    4.43
   0   9   0    0.15    0.23
   0  -9   0    0.26    0.19
   0  -9   0    0.11    0.64
   0   9   0   -0.07    0.20
   7  -5   1   16.23    1.26
  -7  -5  -1   15.29    0.65
   7  -5   1   13.64    0.60
   7  -5   1   14.63    2.65
  -7   5  -1   13.71    0.77
  -7  -5  -1   14.22    2.06
  -7   5  -1   13.72    1.27
  -7   5  -1   14.86    0.61
  -7  -5  -1   15.69    0.70
  -1   7   4  214.41    5.65
   1   7  -4  208.50    5.72
   1   7  -4  225.94    6.42
  -1   7   4  209.46    5.58
  -1  -7   4  208.97    5.51
   1   7  -4  209.95    5.75
   1   7  -4  199.41    5.37
  -1  -7   4  205.33    6.10
  -1  -7   4  207.84    5.55
   1  -7  -4  209.13    5.75
  -1   7   4  212.29    5.68
   1  -7  -4  200.64    5.42
  -2   2  -6   24.76    0.98
  -2  -2  -6   23.75    0.96
  -2   2  -6   23.27    1.47
  -2  -2  -6   22.45    1.66
   2  -2   6   21.98    1.66
   2   2   6   22.81    0.80
   2  -2   6   23.88    0.84
  -2   2  -6   22.70    1.49
  -2   2  -6   24.37    0.92
  -2   2  -6   25.51    0.95
   2   2   6   24.52    0.91
  -4   8   0  107.46    3.23
  -4  -8   0   93.02    2.75
  -4   8   0  102.70    2.97
   4   8   0  107.21    2.95
  -4  -8   0   97.15    3.61
  -4  -8   0  105.33    3.08
  -4   8   0  104.04    2.88
   4  -8   0   95.74    4.32
   4  -8   0  102.18    3.20
   4  -8   0  103.20    2.85
  -4  -8   0  103.43    2.88
  -4  -8   0  103.62    2.98
  -5  -5   4   66.29    1.99
  -5  -5   4   59.52    1.80
  -5   5   4   68.18    2.30
  -5  -5   4   61.39    1.95
   5   5  -4   67.36    4.08
  -5   5   4   65.76    1.93
  -5   5   4   65.47    2.02
   5  -5  -4   67.47    2.52
   5  -5  -4   65.40    2.05
   5   5  -4   68.28    2.09
  -5  -5   4   64.35    2.61
   8   3   1   38.70    1.99
  -8   3  -1   36.46    1.17
  -8   3  -1   33.97    2.25
  -8  -3  -1   32.98    3.09
   8  -3   1   34.64    3.05
  -8   3  -1   34.42    1.42
  -8  -3  -1   33.90    1.14
   8  -3   1   33.89    2.01
  -8  -3  -1   34.11    1.94
   6  -6  -2    5.97    1.30
   6  -6  -2    6.41    0.43
  -6   6   2    6.59    0.39
  -6  -6   2    5.32    0.42
  -6  -6   2    6.15    0.54
  -6  -6   2    5.38    0.67
  -6   6   2    5.73    0.42
   6  -6  -2    5.68    0.59
  -6  -6   2    5.71    0.54
  -7   0   4  105.93    3.29
   7   0  -4  110.57    4.33
  -7   0   4  108.12    3.17
   0  -8   3    2.30    0.28
   0   8   3    2.08    0.24
   0  -8   3    2.02    0.24
   0   8   3    2.10    0.30
   0   8  -3    2.59    0.42
   0  -8  -3    1.70    0.44
   0  -8   3    3.19    0.71
   0  -8  -3    2.32    0.28
   0  -8  -3    2.28    0.36
   0  -8   3    2.43    0.64
   0   8  -3    2.50    0.33
   0   8  -3    2.21    0.34
   1   9   0   52.68    1.66
   1  -9   0   49.85    2.36
  -1   9   0   50.05    1.63
  -1  -9   0   47.64    1.67
   1   9   0   46.87    1.47
   1  -9   0   48.50    1.75
  -1  -9   0   50.25    2.01
  -1   9   0   49.63    1.59
  -1   9   0   50.99    1.60
  -1   9   0   48.79    1.50
  -1  -9   0   50.10    1.50
   1   9   0   50.77    1.57
   1  -9   0   49.57    1.48
  -1  -7  -4  403.55   10.46
  -1   7  -4  418.23   11.04
  -1   7  -4  413.75   12.35
  -1   7  -4  417.91   10.91
   1  -7   4  423.60   11.68
  -1   7  -4  417.41   10.81
   1   7   4  434.38   11.21
  -1  -7  -4  435.19   11.35
   1  -7   4  430.24   11.13
   1  -7   4  416.56   10.72
   1  -3   6    4.60    0.38
   1  -3   6    4.69    0.34
  -1   3  -6    4.96    0.41
   1  -3   6    3.47    0.96
   1   3   6    4.92    0.36
  -1  -3  -6    4.83    0.96
  -1  -3  -6    5.00    0.45
  -1   3  -6    5.12    0.39
  -1   3  -6    4.16    0.81
   1   3   6    4.59    0.30
  -1   3  -6    5.42    0.91
  -1   3  -6    4.82    0.45
  -3  -8  -2  723.54   13.46
  -3   8  -2  707.43   18.59
  -3   8  -2  712.13   13.26
   3  -8   2  719.77   14.01
   3  -8   2  704.28   17.93
  -3  -8  -2  698.00   17.78
  -3  -8  -2  712.50   13.24
  -3   8  -2  716.78   13.18
  -3   8  -2  704.18   18.15
   3  -8   2  714.23   18.34
  -1   8   3   28.04    1.01
   1   8  -3   29.15    1.07
   1   8  -3   28.31    1.15
  -1   8   3   28.92    1.03
   1  -8  -3   27.64    1.01
  -1  -8   3   27.97    0.95
  -1   8   3   28.67    0.97
  -1  -8   3   26.89    0.96
  -1  -8   3   29.13    1.40
   1   8  -3   28.59    1.11
   1  -8  -3   26.94    1.18
  -3  -5   5    5.06    0.36
   3   5  -5    5.14    0.57
  -3  -5   5    5.32    0.42
  -3   5   5    5.26    0.41
   3  -5  -5    4.32    0.58
  -3   5   5    4.93    0.34
  -3   5   5    5.56    0.43
   3   5  -5    4.92    0.51
   3  -5  -5    5.20    0.41
   3   5  -5    5.22    0.58
  -3  -5   5    5.00    0.95
   7   1  -4   20.58    1.90
  -7  -1   4   15.98    0.72
  -7  -1   4   21.11    1.05
  -7   1   4   20.18    0.85
  -7  -1   4   20.35    0.90
  -7   1   4   20.11    0.91
   7  -1  -4   21.36    1.61
   5   3  -5    0.13    0.29
   5   3  -5    0.59    0.59
   5  -3  -5    0.45    0.28
  -5   3   5    0.35    0.35
  -5  -3   5   -0.17    0.28
   5  -3  -5    0.68    0.57
  -5  -3   5    0.15    0.20
  -5   3   5    0.21    0.25
  -5   3   5    0.20    0.29
  -7  -3  -3    0.21    1.21
  -7  -3  -3    0.91    0.21
   7  -3   3    1.17    1.00
  -7  -3  -3    1.36    0.84
   7  -3   3    0.57    0.22
  -7   3  -3    3.09    1.84
   7  -3   3    0.33    0.94
   7   3   3    0.81    0.22
  -7   3  -3    0.72    0.51
  -7   3  -3    0.60    0.22
  -4   7   3   14.26    0.58
  -4   7   3   14.50    0.88
   4  -7  -3   14.59    0.79
   4  -7  -3   14.56    0.68
  -4  -7   3   15.15    0.71
  -4   7   3   14.69    0.73
   4  -7  -3   14.44    1.12
  -4  -7   3   14.07    0.62
  -4   7   3   14.09    0.61
   4   7  -3   14.58    0.68
   4   7  -3   12.57    0.89
  -4  -7   3   14.25    0.92
   4  -8  -1    1.54    0.24
  -4   8   1    1.76    0.40
  -4  -8   1    1.79    0.35
  -4  -8   1    1.73    0.24
   4  -8  -1    1.57    0.99
  -4   8   1    1.45    0.22
   4  -8  -1    1.70    0.47
  -4  -8   1    1.95    0.41
  -4   8   1    1.72    0.37
  -4  -8   1    1.75    0.28
   4   8  -1    1.79    0.28
   5  -7  -2   29.49    1.05
  -5   7   2   30.71    1.01
  -5  -7   2   31.19    1.08
  -5   7   2   31.19    1.23
   5   7  -2   31.06    1.04
   5  -7  -2   32.53    1.93
  -5   7   2   30.46    1.10
  -5  -7   2   32.43    1.32
   5  -7  -2   30.06    1.28
  -5  -7   2   29.19    1.12
  -6  -3  -4   -0.01    0.83
   6  -3   4    1.40    1.00
  -6   3  -4    0.28    0.62
  -6   3  -4    0.43    0.24
  -6  -3  -4    0.28    0.23
   6  -3   4    0.07    0.73
   6   3   4    2.04    0.27
  -6  -3  -4    0.77    0.82
  -6   3  -4    0.79    1.90
  -6  -3  -4    0.15    0.25
  -6   3  -4    0.26    0.23
  -6  -3  -4    0.64    0.19
   6  -3   4    0.71    0.21
  -5  -6  -3  102.71    2.87
  -5   6  -3  100.36    2.85
  -5  -6  -3   91.20    2.66
   5  -6   3  106.52    2.92
  -5  -6  -3  101.38    2.86
  -5  -6  -3   99.92    3.51
   5  -6   3   99.09    4.35
  -5  -6  -3  103.73    2.93
  -5   6  -3  102.78    3.17
  -5   6  -3   95.84    4.14
  -5   6  -3  103.64    2.88
  -5  -6  -3  110.59    3.05
   0   9  -1    4.65    0.45
   0   9   1    5.51    0.39
   0   9  -1    5.28    0.39
   0  -9   1    6.05    0.36
   0   9  -1    5.65    0.40
   0  -9   1    3.99    1.22
   0   9   1    5.56    0.41
   0  -9  -1    5.31    0.33
   0  -9   1    6.93    0.69
   0   9   1    6.17    0.40
   0  -9  -1    5.99    0.66
   0   9  -1    5.09    0.45
   0  -9  -1    4.99    0.53
   3  -2  -6   69.54    2.45
   3   2  -6   68.80    2.53
   3   2  -6   71.57    2.41
  -3   2   6   74.70    2.25
  -3  -2   6   68.65    2.07
  -3  -2   6   70.40    2.06
   3  -2  -6   72.87    3.04
  -3   2   6   67.09    1.99
  -3  -2   6   68.02    2.00
   3   2  -6   69.18    2.19
  -3   2   6   68.48    2.05
   3  -2  -6   69.22    2.22
  -4  -6   4   20.95    0.80
  -4   6   4   20.69    0.86
  -4   6   4   21.88    1.00
   4   6  -4   21.69    0.92
   4   6  -4   20.75    1.13
  -4   6   4   20.91    0.77
   4  -6  -4   22.49    1.22
  -4  -6   4   19.87    1.23
   4  -6  -4   21.29    0.92
  -4  -6   4   20.55    0.87
  -1   8  -3   19.19    0.90
  -1   8  -3   19.85    0.85
   1   8   3   20.59    0.79
  -1  -8  -3   21.42    0.96
   1  -8   3   18.60    1.56
  -1   8  -3   21.03    1.11
  -1  -8  -3   19.10    0.84
  -1   8  -3   18.63    0.76
   1  -8   3   19.95    0.73
   1  -8   3   19.99    1.21
  -2  -3   6  515.63   14.51
  -2  -3   6  530.92   13.69
  -2  -3   6  523.12   13.44
  -2   3   6  522.63   13.49
  -2   3   6  534.65   13.77
  -2   3   6  454.41   11.83
   2  -3  -6  517.77   13.74
   2   3  -6  506.35   13.57
   2  -3  -6  498.18   12.97
   2   3  -6  536.89   14.08
   2   3  -6  503.63   13.33
  -2   3   6  516.48   13.29
  -8  -2  -2  312.69   11.15
   8   2   2  350.02   10.03
  -8  -2  -2  304.94    9.12
  -8   2  -2  306.15    8.49
   8  -2   2  312.43    9.37
   8   2   2  285.96    7.55
   8  -2   2  322.96    8.43
  -8  -2  -2  319.56    8.30
  -8   2  -2  310.05    8.05
  -8   2  -2  296.45   10.13
   8  -2   2  323.17   10.10
   3   0   6  188.99    5.10
  -3   0  -6  176.56    4.82
  -3   0  -6  175.28    5.50
  -3   0  -6  180.75    4.87
  -3   0  -6  177.51    4.78
   3   0   6  178.11    4.72
  -4  -8  -1   27.56    1.03
  -4   8  -1   27.20    0.98
  -4   8  -1   27.62    0.96
   4  -8   1   26.69    0.91
  -4   8  -1   25.51    1.04
  -4  -8  -1   27.61    1.07
  -4   8  -1   27.54    1.29
   4  -8   1   28.46    3.07
  -4  -8  -1   25.97    0.90
  -1   9   1   47.63    1.52
  -1   9   1   43.48    1.36
  -1  -9   1   48.06    2.63
   1  -9  -1   47.75    1.96
  -1   9   1   44.78    1.52
   1   9  -1   49.33    1.80
   1   9  -1   49.00    1.56
   1   9  -1   48.30    1.51
   1   9  -1   51.55    1.63
  -1  -9   1   47.47    1.44
   1  -9  -1   46.28    1.40
  -1   9   1   46.16    1.45
  -1  -9   1   47.72    1.73
   1  -9  -1   47.67    1.67
  -5  -2  -5   80.47    2.33
  -5   2  -5   78.76    3.98
  -5   2  -5   79.29    2.33
  -5  -2  -5   77.17    2.27
  -5   2  -5   81.34    3.03
  -5  -2  -5   73.25    3.15
  -5   2  -5   81.69    2.33
   5   2   5   77.05    2.21
   5  -2   5   78.16    2.21
  -5  -2  -5   68.10    2.79
  -5  -2  -5   79.37    2.26
   5  -2   5   80.09    3.35
  -6  -4   4   40.93    1.36
  -6  -4   4   41.66    1.40
  -6   4   4   42.58    1.46
   6   4  -4   42.62    3.29
   6  -4  -4   42.75    1.50
  -6  -4   4   42.94    2.25
  -6   4   4   42.93    1.37
  -6   4   4   42.43    1.67
  -6  -4   4   40.81    1.47
   2   7  -4   68.97    2.27
   2  -7  -4   66.24    2.22
  -2  -7   4   66.79    2.02
  -2   7   4   68.01    2.03
  -2  -7   4   62.33    1.83
  -2   7   4   66.01    2.03
   2   7  -4   66.61    2.10
  -2  -7   4   63.76    2.41
  -2   7   4   65.11    1.88
   2  -7  -4   64.23    1.98
  -1  -9  -1  115.99    3.15
  -1   9  -1  119.86    3.40
   1  -9   1  118.53    3.22
  -1   9  -1  122.94    3.49
   1  -9   1  117.92    3.59
  -1  -9  -1  116.56    3.50
  -1   9  -1  121.80    3.35
   1   9   1  123.43    3.45
   1   9   1  125.25    3.45
   1  -9   1  120.13    5.26
  -1  -9  -1  122.60    3.52
  -6  -5  -3   30.33    1.02
  -6  -5  -3   27.44    0.98
  -6   5  -3   29.01    1.05
   6  -5   3   25.37    2.08
  -6   5  -3   27.14    1.26
  -6   5  -3   28.27    0.96
  -6  -5  -3   24.06    1.58
   6  -5   3   27.75    1.87
  -6   5  -3   26.72    2.42
  -7  -5   2  109.82    2.67
   7  -5  -2  106.33    2.38
   7   5  -2  110.44    3.46
  -7  -5   2   99.68    2.59
  -7   5   2  103.81    2.30
   7  -5  -2  112.44    2.88
   7  -5  -2  103.51    3.94
  -7  -5   2  109.02    3.17
  -7   5   2  103.60    2.58
  -7   5   2  107.18    2.28
  -8   0   3    0.08    0.18
  -8   0   3    0.32    0.43
   8   0  -3   -1.08    1.44
  -8   0   3   -0.01    0.47
   3  -1   6  115.18    3.23
   3  -1   6  103.07    2.85
  -3   1  -6   99.97    2.82
  -3  -1  -6  105.96    2.33
  -3  -1  -6  105.35    2.38
  -3   1  -6  105.96    2.40
  -3   1  -6  104.33    2.27
   3   1   6  103.91    2.18
  -3   1  -6  101.17    3.26
  -7   4   3    5.82    0.36
   7   4  -3    6.66    1.72
  -7  -4   3    5.60    0.58
  -7  -4   3    6.12    0.58
  -7   4   3    5.42    0.56
  -7   4   3    5.46    0.36
  -7  -4   3    7.17    0.91
  -8  -3   2   87.14    2.76
   8   3  -2   99.62    4.55
  -8  -3   2   77.82    2.28
  -8   3   2   82.22    2.32
  -8  -3   2   92.32    2.17
   8  -3  -2   77.97    1.84
   8  -3  -2   84.62    2.73
  -8   3   2   85.93    1.98
  -6  -6  -2    1.25    0.28
  -6   6  -2    0.66    0.43
   6  -6   2    0.98    0.86
  -6  -6  -2    0.86    0.21
  -6   6  -2    0.98    0.22
   6  -6   2    0.81    0.22
  -6   6  -2    0.94    0.27
  -6  -6  -2    1.04    0.29
  -6   6  -2    0.32    0.85
   6  -6   2   -0.45    1.96
  -6  -6  -2    1.31    0.77
   6   0  -5    0.50    0.59
  -6   0   5    0.04    0.25
   6   0  -5    0.27    0.22
  -6   0   5   -0.07    0.25
   6   0  -5    0.02    0.09
  -2   9   0  274.05    5.36
   2  -9   0  288.67    7.40
   2   9   0  284.18    5.45
  -2   9   0  293.94    5.75
   2  -9   0  286.44    5.46
  -2   9   0  285.93    5.65
   2   9   0  293.14    5.64
  -2  -9   0  295.16    5.64
  -2   9   0  292.30    5.60
  -2  -9   0  276.36    5.83
  -2  -9   0  287.51    5.80
   2  -9   0  282.08    5.81
   5  -7   2   43.14    1.73
  -5  -7  -2   48.74    1.99
  -5   7  -2   47.96    1.27
  -5   7  -2   45.25    1.41
  -5  -7  -2   49.12    1.32
   5  -7   2   47.08    3.46
  -5   7  -2   49.21    2.08
  -5  -7  -2   47.78    1.26
   5  -7   2   50.02    1.22
  -5  -7  -2   47.15    1.22
  -5  -7  -2   48.10    1.26
   2   8  -3    0.94    0.27
  -2  -8   3    0.44    0.23
   2   8  -3    0.14    0.33
  -2   8   3    0.45    0.27
  -2   8   3    0.57    0.25
   2  -8  -3    0.80    0.37
  -2   8   3    0.58    0.17
   2   8  -3    0.47    0.30
  -2  -8   3    1.15    0.63
   2  -8  -3    0.52    0.53
  -2  -8   3    0.63    0.21
   2  -8  -3    0.66    0.22
  -8  -1   3   22.75    0.82
  -8  -1   3   21.37    1.04
   8  -1  -3   20.55    2.22
  -8   1   3   19.80    0.98
   8   1  -3   21.69    2.58
  -8  -1   3   20.91    1.08
  -4  -4  -5    8.33    0.48
  -4  -4  -5    7.79    0.46
  -4  -4  -5    7.81    0.44
  -4   4  -5    7.84    0.43
   4  -4   5    7.60    1.26
   4  -4   5    7.30    0.37
  -4   4  -5    6.76    2.07
  -4   4  -5    6.41    0.78
  -4   4  -5    8.02    0.48
   8  -4   0  299.97    7.00
   8   4   0  323.19    7.40
   8  -4   0  287.65    5.62
  -8  -4   0  296.24    5.83
  -8   4   0  264.74    6.16
  -8  -4   0  282.30    6.79
  -8   4   0  271.56    5.51
  -8  -4   0  288.46    5.55
  -8   4   0  299.03    5.72
   8  -4   0  294.17    9.41
  -8  -4   0  256.70    8.08
   7  -2  -4   22.80    1.61
  -7   2   4   21.97    0.78
  -7   2   4   21.02    1.03
  -7   2   4   20.25    0.83
  -7  -2   4   20.13    0.95
  -7  -2   4   21.30    0.84
   7  -2  -4   21.66    0.97
   7   2  -4   22.75    2.04
   0   6  -5    1.54    0.32
   0   6  -5    1.89    0.26
   0   6   5    1.30    0.22
   0   6  -5    1.34    0.47
   0  -6  -5    2.45    0.42
   0   6  -5    2.06    1.61
   0  -6   5    4.04    0.98
   0  -6   5    1.84    0.25
   0  -6  -5    1.76    0.40
   0   6  -5    1.78    0.37
   0  -6   5    1.47    0.27
   0  -6  -5    1.44    0.31
  -4  -7  -3   75.12    1.79
  -4   7  -3   73.70    1.99
  -4  -7  -3   70.95    1.67
   4  -7   3   69.14    2.37
   4  -7   3   76.58    3.55
   4  -7   3   68.64    1.55
  -4   7  -3   71.96    1.71
  -4  -7  -3   73.49    1.76
  -4   7  -3   73.52    2.89
  -4   7  -3   70.89    1.63
   4   0  -6  339.56    7.88
   4   0  -6  316.04    6.71
  -4   0   6  316.76    6.08
  -4   0   6  312.15    6.12
   4   0  -6  321.42    6.50
  -4   0   6  320.46    6.19
   6   1  -5   55.99    1.41
   6  -1  -5   58.31    2.46
  -6   1   5   57.50    1.49
  -6  -1   5   54.53    1.42
   6  -1  -5   55.20    1.44
  -6   1   5   53.57    1.41
  -6   1   5   59.84    1.70
   6  -1  -5   59.17    2.08
   6   1  -5   59.42    2.25
   6   1  -5   58.41    1.74
  -2   7  -4    6.36    1.29
   2  -7   4    7.31    0.92
  -2  -7  -4    6.38    0.46
  -2   7  -4    6.35    0.44
  -2  -7  -4    6.56    0.49
  -2   7  -4    6.49    0.40
  -2  -7  -4    5.66    0.52
   2   7   4    7.52    0.41
   2  -7   4    5.68    0.34
   2  -7   4    6.61    0.98
  -2   7  -4    6.06    0.59
   1  -6  -5    5.96    0.53
   1   6  -5    4.97    0.40
  -1  -6   5    5.13    0.38
   1   6  -5    4.29    0.48
  -1  -6   5    6.00    1.05
   1   6  -5    4.10    1.54
   1  -6  -5    6.19    0.63
   1   6  -5    4.87    0.55
   1   6  -5    4.72    0.36
  -1   6   5    4.97    0.36
  -1  -6   5    4.20    0.32
  -1   6   5    5.10    0.30
  -3  -5  -5   94.51    2.21
   3  -5   5   94.02    2.01
   3  -5   5   93.48    3.34
  -3   5  -5   95.91    2.10
  -3   5  -5   88.86    4.62
  -3  -5  -5   97.30    2.24
  -2   3  -6   73.96    2.87
  -2   3  -6   77.97    1.82
  -2   3  -6   84.99    1.93
   2  -3   6   82.59    1.81
   2   3   6   80.86    1.76
  -2  -3  -6   81.83    1.92
   2   3   6   86.59    1.97
  -2   3  -6   82.26    1.99
  -2  -3  -6   66.38    2.55
   2  -3   6   81.83    3.08
  -2   3  -6   80.82    2.52
  -2  -3  -6   82.33    2.01
  -5  -5  -4   11.40    1.05
  -5   5  -4   11.89    2.19
  -5   5  -4    8.28    0.47
  -5   5  -4   10.33    0.48
  -5  -5  -4   10.36    0.44
  -5  -5  -4   10.10    0.48
   5  -5   4    9.53    0.43
  -5   5  -4   10.84    0.84
  -5  -5  -4   11.08    0.54
   5  -5   4   11.20    1.20
  -8  -4   1   42.34    1.22
  -8  -4   1   39.32    2.25
   8   4  -1   41.39    2.03
   8  -4  -1   41.49    1.17
  -8  -4   1   41.49    1.19
  -8   4   1   38.23    1.17
   8  -4  -1   38.61    1.68
   8  -4  -1   41.55    3.30
  -2   8  -3   12.65    0.89
  -2  -8  -3   13.43    0.60
   2  -8   3   16.50    1.69
   2  -8   3   13.78    1.03
  -2   8  -3   13.81    0.62
  -2  -8  -3   15.08    0.70
   2   8   3   13.94    0.56
   2  -8   3   12.57    0.49
  -4   1   6   78.91    1.91
   4  -1  -6   75.82    2.91
   4   1  -6   79.34    2.29
  -4  -1   6   85.25    1.96
  -4   1   6   76.62    1.81
  -4  -1   6   77.19    1.78
  -4   1   6   78.44    1.82
   4  -1  -6   78.09    2.08
   4   1  -6   79.97    2.15
   4  -1  -6   74.88    2.26
   4   1  -6   80.68    2.57
  -2   9   1   53.20    1.34
   2   9  -1   56.82    1.42
  -2   9   1   56.28    1.42
   2  -9  -1   55.76    2.11
   2   9  -1   54.47    1.42
  -2   9   1   57.01    1.37
  -2   9   1   57.72    1.49
  -2  -9   1   54.67    2.35
  -2  -9   1   56.14    1.34
   2  -9  -1   56.47    1.34
  -2  -9   1   54.88    1.63
  -4   6  -4  587.19   14.83
  -4   6  -4  613.63   15.55
  -4  -6  -4  625.73   15.85
   4  -6   4  606.76   16.51
  -4  -6  -4  614.58   15.51
  -4  -6  -4  604.92   11.31
   4  -6   4  592.03   12.47
  -4   6  -4  605.32   11.21
  -1   6  -5  206.33    7.33
   1   6   5  234.39    4.66
   1   6   5  215.25    4.25
  -1  -6  -5  221.40    4.78
  -1   6  -5  219.77    4.39
  -1   6  -5  222.57    4.54
   1  -6   5  208.39    4.15
  -1   6  -5  213.58    4.23
  -1   6  -5  216.53    4.69
   1  -6   5  207.48    5.39
  -1  -6  -5  213.90    4.34
   0   4  -6   93.06    3.20
   0  -4  -6   89.27    2.10
   0  -4   6   90.20    3.29
   0   4  -6   86.84    2.47
   0  -4  -6   94.47    2.40
   0   4  -6   85.79    2.06
   0   4  -6   91.20    2.11
   0   4   6   90.95    1.97
   0  -4   6   92.65    2.00
   0   4   6   90.81    2.04
   0   4   6   82.39    1.95
  -3   2  -6   19.15    1.52
  -3  -2  -6   22.22    0.78
  -3   2  -6   21.94    0.75
   3  -2   6   22.18    1.63
   3   2   6   21.65    0.67
   3  -2   6   20.76    0.65
  -3   2  -6   21.07    0.71
  -3  -2  -6   22.23    0.81
  -3   2  -6   21.08    0.80
   2  -9   1    5.38    0.32
  -2  -9  -1    5.28    0.31
  -2  -9  -1    6.40    0.58
   2  -9   1    5.11    0.67
  -2   9  -1    5.51    0.40
  -2   9  -1    5.10    0.48
   2  -9   1    5.38    1.71
  -2  -9  -1    5.14    0.53
   2   9   1    5.78    0.36
  -2   9  -1    5.17    0.36
   2   9   1    5.32    0.37
  -1  -4   6    1.53    0.24
   1   4  -6    1.72    0.30
  -1   4   6    1.70    0.24
  -1   4   6    2.20    0.28
   1   4  -6    2.40    0.65
  -1  -4   6    1.63    0.94
  -1   4   6    1.84    0.29
   1   4  -6    1.66    0.54
   1  -4  -6    1.73    0.51
  -7  -5  -2    9.99    0.45
  -7  -5  -2   10.83    0.50
  -7   5  -2   11.82    0.78
   7  -5   2   11.06    1.20
  -7   5  -2   10.85    0.47
  -7   5  -2   11.55    1.55
  -7  -5  -2   11.70    1.59
   7  -5   2    9.42    2.04
   3  -3  -6    0.34    0.42
  -3   3   6    0.60    0.25
  -3  -3   6    0.38    0.22
   3   3  -6   -0.02    0.44
   3  -3  -6    0.41    0.23
  -3   3   6    0.18    0.26
   3  -3  -6    0.75    0.49
  -3  -3   6    0.10    0.80
  -3   3   6    0.34    0.20
   3   3  -6    0.80    0.38
   3   3  -6    0.75    0.44
  -3  -3   6    0.36    0.25
  -3   3   6    0.46    0.22
   9   0   0   31.34    0.96
  -9   0   0   35.45    0.98
  -9   0   0   31.44    2.06
   9   0   0   36.82    2.79
  -9   0   0   35.19    1.38
   6  -7   0    0.12    0.20
  -6  -7   0   -0.03    0.19
  -6  -7   0    0.16    0.20
  -6   7   0    0.30    0.49
  -6  -7   0    0.27    0.33
   6  -7   0    0.59    0.53
  -6  -7   0    1.26    1.49
  -6   7   0    0.02    0.22
  -6  -7   0    0.31    0.28
  -6   7   0   -0.11    0.33
   6  -7   0   -0.20    1.71
   4  -8  -2    0.36    0.21
  -4   8   2    0.20    0.18
  -4  -8   2    0.11    0.20
  -4  -8   2    0.11    0.23
  -4   8   2   -0.04    0.24
   4   8  -2    0.29    0.23
   4  -8  -2    0.14    0.74
  -4   8   2    0.20    0.35
  -4  -8   2    0.30    0.39
   4  -8  -2    0.22    0.44
  -8  -2   3   23.69    1.07
  -8  -2   3   23.56    0.84
   8  -2  -3   19.00    2.03
   8   2  -3   22.87    2.74
  -8   2   3   22.86    1.00
   8  -2  -3   22.29    1.38
  -8  -3  -2    8.92    1.08
   8  -3   2   11.64    1.30
  -8   3  -2   10.52    0.81
   8  -3   2   10.03    0.49
  -8  -3  -2    9.89    0.45
  -8   3  -2   10.00    0.46
   8  -3   2   11.73    1.88
  -8  -3  -2    9.15    2.00
  -7   0  -4   12.60    0.59
   7   0   4   10.77    0.47
  -7   0  -4   10.60    1.15
  -7   0  -4   11.75    0.49
  -8   4  -1   63.16    1.81
   8  -4   1   63.26    2.54
  -8  -4  -1   61.53    3.84
  -8   4  -1   60.89    1.42
  -8  -4  -1   57.66    2.37
  -8  -4  -1   60.15    1.47
   8  -4   1   65.78    4.02
  -8  -4  -1   64.36    1.51
   2  -6  -5   17.87    0.68
  -2   6   5   19.45    0.73
   2  -6  -5   18.35    0.84
  -2  -6   5   18.33    1.38
   2   6  -5   18.17    0.80
   2   6  -5   18.98    0.87
  -2  -6   5   18.99    0.71
   2   6  -5   19.06    0.88
  -2   6   5   18.22    0.61
   0  -9   2   73.40    4.11
   0   9  -2   73.07    1.77
   0   9  -2   70.25    1.80
   0  -9  -2   71.57    1.62
   0  -9   2   74.12    1.66
   0  -9  -2   73.31    1.86
   0   9   2   73.24    1.71
   0  -9   2   67.62    2.02
   0   9   2   69.39    1.65
   0   9  -2   73.01    1.72
   0  -9  -2   68.86    1.93
   0   9  -2   74.77    1.83
  -5   3  -5   19.94    0.69
  -5  -3  -5   20.00    0.65
   5   3   5   20.66    0.71
   5  -3   5   19.93    1.62
   5  -3   5   21.02    0.66
  -5   3  -5   19.52    2.42
  -5  -3  -5   22.34    0.77
  -5  -3  -5   19.47    0.72
  -5   3  -5   20.29    0.75
   9   0  -1   -1.78    1.63
  -9   0   1    0.63    0.85
  -9   0   1    0.13    0.24
  -3  -7   4  147.50    3.00
  -3   7   4  151.59    3.05
  -3  -7   4  147.97    3.76
   3  -7  -4  153.93    3.59
   3  -7  -4  156.26    3.32
   3   7  -4  154.85    3.64
   3   7  -4  146.76    3.18
  -3  -7   4  153.52    3.22
  -9  -1   0  131.43    4.52
  -9  -1   0  129.71    3.61
   9  -1   0  141.85    3.01
  -9   1   0  147.43    3.01
  -9   1   0  140.59    3.31
  -9  -1   0  142.65    2.96
   9   1   0  150.91    5.29
  -9   1   0  149.85    4.62
   9  -1   0  158.60    6.21
  -6  -2   5   12.36    0.60
   6   2  -5   11.29    1.13
   6  -2  -5   12.64    1.05
  -6   2   5   13.39    0.63
   6  -2  -5   12.90    0.61
  -6   2   5   13.02    0.72
   6   2  -5   11.74    0.60
   6  -2  -5   14.41    1.19
  -6   2   5   12.14    0.58
  -7  -6   0   10.46    0.78
   7  -6   0   11.87    0.52
   7  -6   0   10.79    0.94
  -7  -6   0   12.62    2.00
   7  -6   0   14.46    2.59
  -7   6   0   11.38    0.93
  -7  -6   0   12.82    0.62
  -7   6   0   11.14    0.61
  -7  -6   0   11.95    0.59
  -1  -4  -6   66.80    1.78
  -1   4  -6   68.61    1.65
   1  -4   6   65.43    2.76
   1  -4   6   68.87    1.57
  -1   4  -6   71.16    1.74
  -1   4  -6   65.62    1.73
  -1  -4  -6   68.71    1.71
  -1   4  -6   66.32    2.81
   1   4   6   68.52    1.62
  -1   4  -6   66.90    2.09
  -6  -7   1  243.90    5.15
  -6   7   1  251.03    4.84
   6  -7  -1  248.85    4.87
   6  -7  -1  241.78    7.11
  -6   7   1  248.23    5.22
  -6  -7   1  257.68    5.04
  -6  -7   1  225.57    5.44
  -6   7   1  245.00    4.87
  -6  -7   1  248.86    5.06
   6  -7  -1  261.17    5.59
  -7   1  -4   74.50    1.79
  -7  -1  -4   70.18    1.60
  -7  -1  -4   77.96    1.86
  -7   1  -4   62.81    2.29
   7  -1   4   69.03    1.59
  -7   1  -4   70.63    1.61
  -7  -1  -4   66.79    2.71
   7   1   4   70.18    1.66
  -4   5   5  337.71    6.46
  -4  -5   5  350.51    6.79
   4  -5  -5  353.62    6.82
  -4  -5   5  340.24    8.00
   4  -5  -5  352.16    7.15
  -4   5   5  343.41    6.77
   4   5  -5  360.70    7.45
   4   5  -5  363.28    8.37
   4   5  -5  345.76    6.83
  -1   9   2   29.81    0.91
   1   9  -2   29.01    0.96
  -1  -9   2   31.01    0.87
   1  -9  -2   30.66    1.28
   1   9  -2   30.27    0.95
  -1  -9   2   30.39    1.26
  -1   9   2   29.79    0.86
   1   9  -2   30.06    1.10
   1  -9  -2   28.59    0.82
   1  -9  -2   26.55    1.00
  -1  -9   2   30.83    0.93
  -5  -4   5  137.30    3.01
  -5  -4   5  140.96    4.27
  -5   4   5  141.10    2.98
   5   4  -5  140.40    4.17
  -5   4   5  145.31    3.25
   5   4  -5  124.80    3.21
   5  -4  -5  141.47    3.02
   5   4  -5  137.57    3.07
  -7  -4  -3   25.69    2.02
  -7   4  -3   31.68    2.70
  -7  -4  -3   28.83    1.67
  -7   4  -3   27.10    1.18
  -7  -4  -3   29.00    0.83
   7  -4   3   26.81    0.79
   7  -4   3   28.95    1.91
  -7   4  -3   28.02    0.82
   7  -4   3   25.90    1.89
   6  -4   4   25.59    1.59
  -6  -4  -4   27.06    1.64
  -6  -4  -4   25.31    0.81
  -6   4  -4   24.72    2.80
  -6   4  -4   27.61    0.82
   6  -4   4   28.96    0.83
  -6  -4  -4   27.72    0.80
  -6   4  -4   22.37    0.77
  -6  -4  -4   22.53    1.51
  -6  -4  -4   26.35    0.84
   6  -4   4   21.57    1.72
  -4   2   6  105.12    2.35
  -4  -2   6  111.69    2.49
   4   2  -6  115.60    2.98
   4   2  -6  114.93    3.00
   4  -2  -6  108.39    2.91
   4  -2  -6  109.92    2.56
  -4   2   6  118.97    2.65
   4  -2  -6  120.73    2.88
  -4   2   6  118.48    2.54
   4   2  -6  122.49    2.94
   4  -2  -6  122.07    3.78
  -4  -2   6  126.13    2.68
  -9  -1   1  209.67    4.20
   9   1  -1  199.38    6.78
  -9   1   1  197.46    3.92
  -9  -1   1  215.15    5.64
  -9   1   1  197.58    4.94
   9  -1  -1  198.79    7.44
   1   9   2   20.95    0.71
  -1   9  -2   19.72    0.68
  -1   9  -2   19.60    0.80
  -1   9  -2   19.21    0.75
   1  -9   2   20.60    0.65
   1  -9   2   19.74    1.06
  -1  -9  -2   20.50    0.86
   1   9   2   19.13    0.71
   1  -9   2   17.69    2.34
  -1  -9  -2   19.82    0.88
  -4   8  -2    6.02    0.37
  -4   8  -2    5.92    0.75
  -4  -8  -2    6.31    0.43
  -4   8  -2    6.07    0.41
   4  -8   2    6.72    1.87
   4  -8   2    6.15    0.36
  -4  -8  -2    5.41    0.38
  -4  -8  -2    6.23    0.50
   2  -4  -6  120.86    3.12
  -2   4   6  117.54    2.57
   2   4  -6  119.65    2.67
  -2  -4   6  120.58    3.90
  -2   4   6  126.67    2.77
   2  -4  -6  124.63    2.63
   2   4  -6  117.72    2.95
  -2  -4   6  122.89    2.57
   7  -6  -1   14.38    0.60
   7  -6  -1   13.70    0.92
  -7  -6   1   13.52    0.65
  -7  -6   1   12.67    1.66
  -7   6   1   14.61    0.66
   7  -6  -1   13.18    2.06
  -7  -6   1   14.67    0.85
  -7   6   1   13.59    0.53
   8   0   3    0.19    0.22
  -8   0  -3    0.22    0.20
   8   0   3   -0.13    0.70
  -8   0  -3    0.01    0.78
   3   8  -3    7.76    0.51
  -3   8   3    7.09    0.40
   3   8  -3    8.71    0.74
   3  -8  -3    7.16    0.77
  -3   8   3    7.50    0.47
  -3  -8   3    7.21    0.39
   3  -8  -3    8.06    0.46
  -3  -8   3    9.03    0.76
  -3  -8   3    7.76    0.45
   3  -8  -3    7.04    0.58
  -3   8   3    7.82    0.39
  -3   8   3    8.08    0.56
  -7  -3   4  164.00    3.50
   7   3  -4  150.64    5.82
  -7   3   4  170.57    3.98
   7  -3  -4  171.20    4.77
   7  -3  -4  164.38    3.69
  -7   3   4  162.54    3.35
  -7   3   4  167.79    3.59
   3   9   0    0.28    0.24
  -3   9   0    0.36    0.19
  -3  -9   0    0.15    0.39
  -3   9   0   -0.11    0.30
  -3  -9   0   -0.05    0.40
   3  -9   0    0.04    0.17
  -3   9   0    0.23    0.22
   3  -9   0    1.26    1.29
  -3  -9   0    0.01    0.16
  -6  -6   3   30.15    0.93
   6  -6  -3   36.32    1.88
  -6  -6   3   33.96    1.13
   6   6  -3   35.34    0.96
  -6   6   3   33.31    0.93
   6  -6  -3   32.44    0.99
  -6   6   3   35.55    0.97
   6  -6  -3   34.68    1.20
  -6  -6   3   35.08    1.37
  -6  -7  -1   49.00    1.52
  -6   7  -1   41.14    1.27
  -6  -7  -1   47.69    1.53
  -6  -7  -1   39.63    1.62
  -6  -7  -1   46.20    1.48
  -6   7  -1   44.15    1.52
   6  -7   1   50.95    3.93
  -6  -7  -1   49.47    1.59
  -6   7  -1   46.10    1.93
  -6  -7  -1   42.48    2.55
   6  -7   1   46.80    1.96
  -5   8   0  105.60    3.00
  -5  -8   0  103.34    2.91
   5  -8   0   96.72    4.62
  -5  -8   0  106.63    3.08
  -5   8   0  101.15    3.07
   5  -8   0  103.53    3.24
  -5  -8   0   87.07    2.47
  -5   8   0  105.71    2.88
   5  -8   0   99.00    2.72
   9   0   1    2.53    1.31
  -9   0  -1   -0.26    0.55
   9   0   1   -0.24    0.23
  -9   0  -1    0.13    0.25
  -9   0  -1    2.07    1.58
   2  -6   5   50.66    2.44
  -2   6  -5   48.68    1.51
  -2  -6  -5   49.44    1.59
  -2  -6  -5   47.77    1.63
  -2  -6  -5   50.13    1.54
  -2   6  -5   51.79    1.66
   2  -6   5   51.48    1.60
  -2   6  -5   49.26    3.53
  -8  -1  -3    2.88    0.94
  -8   1  -3    3.67    0.75
   8   1   3    3.14    0.33
   8  -1   3    1.94    0.91
  -8   1  -3    2.91    0.28
  -8  -1  -3    2.75    0.27
   8  -1   3    2.69    0.31
  -8  -4   2   88.04    2.57
   8   4  -2   90.34    3.89
  -8  -4   2   80.40    2.94
  -8  -4   2   84.71    2.80
  -8   4   2   92.36    2.62
   8  -4  -2   92.13    3.11
  -8   4   2   87.42    2.44
  -4   0  -6   14.48    0.64
   4   0   6   14.92    0.59
  -4   0  -6   14.52    0.62
  -4   0  -6   15.02    0.70
  -3   7  -4  110.42    3.10
  -3  -7  -4  108.60    2.99
   3  -7   4  109.64    3.93
  -3   7  -4  105.02    4.35
  -3  -7  -4  112.14    3.15
   3  -7   4  111.03    3.86
  -3   7  -4  110.20    3.02
  -9   2   0    9.88    0.49
  -9  -2   0    9.80    0.51
  -9  -2   0    9.56    1.66
   9  -2   0    9.56    1.16
  -9   2   0    8.78    0.66
   9   2   0    8.95    1.42
   7  -6   1   38.88    3.50
  -7   6  -1   38.28    1.87
  -7  -6  -1   40.81    1.36
  -7  -6  -1   37.51    2.84
  -7   6  -1   35.79    1.32
   7  -6   1   41.20    1.91
  -7  -6  -1   38.87    1.27
  -7  -6  -1   40.70    1.30
   5  -7  -3  241.63    6.48
  -5   7   3  246.56    6.36
  -5   7   3  228.32    6.43
  -5   7   3  238.83    6.19
   5   7  -3  242.42    6.30
  -5  -7   3  228.17    6.10
   5  -7  -3  239.30    6.31
  -5  -7   3  253.05    6.98
  -5  -7   3  242.09    6.31
   5  -7  -3  241.63    7.08
  -9   1  -1    0.59    0.49
  -9  -1  -1    0.50    0.66
   9   1   1    1.01    0.27
   9   1   1   -1.16    0.88
  -9  -1  -1    0.83    1.49
   9  -1   1    0.16    0.26
  -9  -1  -1    0.32    0.24
  -9   1  -1    0.53    0.24
  -3  -9   1    4.21    0.31
  -3  -9   1    4.48    0.61
  -3   9   1    4.84    0.36
  -3   9   1    4.94    0.47
   3  -9  -1    4.84    1.03
   3  -9  -1    3.30    0.51
   3  -9  -1    4.69    0.33
   3   9  -1    4.77    0.39
  -3   9   1    4.44    0.32
   5  -6  -4   24.31    1.02
  -5  -6   4   24.11    1.37
  -5   6   4   25.04    0.87
   5  -6  -4   24.82    1.37
   5   6  -4   26.16    0.99
  -5  -6   4   23.27    0.94
  -5   6   4   26.16    1.18
  -5   8   1   15.14    0.70
   5   8  -1   14.86    0.62
   5  -8  -1   14.43    0.90
  -5  -8   1   14.92    0.72
  -5   8   1   14.60    0.82
   5  -8  -1   14.99    1.66
  -5   8   1   15.50    0.62
  -5  -8   1   13.85    0.77
   5  -8  -1   14.93    0.62
  -5  -8   1   14.09    0.61
  -3   3  -6    5.16    0.44
   3  -3   6    4.98    1.07
  -3  -3  -6    4.72    0.41
   3   3   6    5.24    0.32
   3  -3   6    4.95    0.33
  -3   3  -6    5.18    0.41
  -3  -3  -6    5.17    0.44
  -3   3  -6    5.07    0.39
  -3   3  -6    3.23    1.13
   6   0   5    0.10    0.16
  -6   0  -5   -0.02    0.23
  -6   0  -5   -0.07    0.17
  -7   2  -4   60.73    2.36
  -7   2  -4   63.62    1.92
   7  -2   4   60.63    1.77
   7  -2   4   62.46    2.83
  -7  -2  -4   58.31    2.74
   7   2   4   62.77    1.89
  -7  -2  -4   65.61    1.88
   7  -2   4   63.37    2.59
  -7   2  -4   62.63    1.81
  -7  -2  -4   67.03    2.02
   3  -8   3   91.27    3.12
  -3   8  -3   91.31    2.62
  -3  -8  -3   92.10    2.62
   3  -8   3   89.42    4.14
  -3   8  -3   90.42    3.21
  -3  -8  -3   92.82    2.68
  -2  -9   2   46.83    1.76
   2   9  -2   47.05    1.50
  -2  -9   2   45.48    1.38
   2   9  -2   44.78    1.72
  -2  -9   2   45.27    1.42
  -2   9   2   44.57    1.41
  -2   9   2   48.18    1.46
   2  -9  -2   46.51    1.42
  -2   9   2   47.58    1.52
   2  -9  -2   45.39    1.86
   2   9  -2   45.38    1.47
   4  -1   6    8.39    0.41
  -4  -1  -6    7.58    0.49
  -4   1  -6    7.20    0.50
  -4   1  -6    5.30    1.01
  -4   1  -6    8.13    0.47
   4   1   6    8.28    0.42
  -4   1  -6    7.38    0.42
  -4  -1  -6    7.35    0.43
   6  -5  -4  174.01    5.41
   6   5  -4  160.04    6.56
  -6   5   4  161.20    4.65
  -6  -5   4  157.49    4.37
   6   5  -4  162.89    4.34
  -6  -5   4  163.66    5.25
  -6   5   4  164.45    4.37
   6  -5  -4  161.42    4.50
   9  -2  -1    0.05    0.64
   9  -2  -1   -0.27    2.04
  -9  -2   1   -0.09    0.24
  -9  -2   1    0.68    0.92
  -9   2   1   -0.02    0.25
   9   2  -1    0.41    1.29
  -3   9  -1  101.00    2.78
  -3  -9  -1   99.76    2.89
   3  -9   1   98.50    5.03
  -3   9  -1   98.19    2.78
   3  -9   1   98.93    3.15
   3  -9   1   99.21    2.70
  -3  -9  -1   94.88    2.77
  -3   9  -1   99.58    2.97
  -8  -3   3   31.77    1.15
   8   3  -3   33.89    3.11
  -8   3   3   31.55    1.07
   8  -3  -3   32.55    1.52
   8  -3  -3   31.66    2.40
  -8  -3   3   30.83    1.34
  -6  -1  -5    6.63    0.42
  -6   1  -5    7.11    0.41
  -6  -1  -5    6.45    0.49
  -6   1  -5    6.54    0.44
   6  -1   5    6.56    0.39
   6   1   5    6.68    0.38
  -7   5   3    5.10    0.36
   7  -5  -3    5.03    1.23
  -7   5   3    4.47    0.34
   7  -5  -3    4.59    0.38
   7  -5  -3    5.61    0.57
  -7  -5   3    4.83    0.51
   7   5  -3    4.96    1.03
  -3  -6   5   32.81    1.15
   3  -6  -5   35.11    1.21
   3   6  -5   33.46    1.28
  -3  -6   5   33.91    1.88
   3   6  -5   35.45    3.19
  -3   6   5   33.69    1.09
   3  -6  -5   32.91    1.37
  -3   6   5   33.60    1.20
   3   6  -5   28.92    1.88
   3   6  -5   36.64    1.48
  -2   9  -2    0.20    0.23
   2  -9   2    0.22    0.57
  -2  -9  -2   -0.15    0.34
  -2   9  -2    0.31    0.24
  -2  -9  -2    0.17    0.36
   2   9   2   -0.06    0.18
   2  -9   2   -0.22    0.17
   2  -9   2    0.06    1.51
  -2   9  -2   -0.17    0.36
  -5   8  -1   12.56    0.56
  -5  -8  -1   12.22    0.55
  -5  -8  -1   11.95    0.59
   5  -8   1   12.22    0.96
   5  -8   1   12.51    0.55
  -5   8  -1   12.93    0.91
   5  -8   1   10.34    2.32
  -5  -8  -1   11.15    1.08
  -5   8  -1   13.35    0.63
  -5  -8  -1   13.03    0.69
  -9   0   2  627.74   15.91
  -9   0   2  609.09   16.05
   9   0  -2  645.25   19.89
  -6   3   5  614.57   15.81
   6   3  -5  566.20   15.67
   6  -3  -5  624.26   16.45
   6  -3  -5  619.08   15.77
  -6   3   5  616.75   15.67
  -6  -3   5  547.89   13.92
  -8   2  -3    8.91    0.84
   8  -2   3    7.50    1.18
  -8   2  -3    7.75    0.42
  -8  -2  -3    8.06    0.44
   8  -2   3    7.35    0.43
   8   2   3    7.34    0.47
   8  -2   3    7.73    1.16
  -8  -2  -3    7.75    1.12
  -4  -5  -5  807.01   17.85
   4  -5   5  808.67   19.74
  -4  -5  -5  802.42   20.21
  -4   5  -5  795.81   20.00
  -4   5  -5  800.86   23.93
   6  -7  -2   63.60    1.91
  -6   7   2   63.08    1.88
   6  -7  -2   62.42    2.13
  -6   7   2   62.47    1.80
  -6  -7   2   63.68    1.91
   6  -7  -2   62.65    2.96
  -6  -7   2   59.07    1.92
  -6  -7   2   62.45    2.08
  -8  -5   0    0.32    0.27
   8  -5   0    0.23    0.62
  -8  -5   0   -0.13    1.43
   8  -5   0    2.26    1.70
  -8   5   0    0.15    0.29
  -8  -5   0    0.41    0.30
  -9   1   2   17.14    0.71
  -9  -1   2   16.41    0.73
   9  -1  -2   15.98    2.62
  -9   1   2   17.51    1.14
   9   1  -2   17.61    2.66
  -9  -1   2   18.93    1.23
  -4   3   6   22.70    0.93
   4   3  -6   22.82    1.19
   4   3  -6   22.65    1.12
  -4  -3   6   21.14    0.79
   4  -3  -6   23.23    1.14
   4   3  -6   22.70    1.11
   4  -3  -6   21.98    0.82
  -4   3   6   22.60    0.91
   5   0  -6    2.61    0.68
  -5   0   6    1.31    0.26
   5   0  -6    0.82    0.51
   3  -4  -6   56.94    1.70
  -3   4   6   59.88    1.85
  -3  -4   6   58.64    2.76
   3   4  -6   56.90    2.00
  -3   4   6   58.90    1.82
   3   4  -6   55.43    1.85
   9  -2   1   83.08    3.38
  -9  -2  -1   87.67    3.32
   9   2   1   88.54    3.52
  -9  -2  -1   88.96    4.68
  -9  -2  -1   89.18    2.49
  -9   2  -1   91.98    2.54
  -9   2  -1   87.97    2.82
   6  -6   3    3.89    1.40
  -6   6  -3    3.75    1.20
  -6  -6  -3    4.34    0.37
  -6  -6  -3    4.30    0.30
  -6  -6  -3    4.19    0.36
   6  -6   3    3.09    0.92
  -6   6  -3    4.16    0.33
  -6  -6  -3    3.81    0.86
  -6   6  -3    4.33    0.37
  -6  -6  -3    4.35    0.38
   7  -6  -2    6.24    0.43
  -7   6   2    6.75    0.46
  -7  -6   2    6.94    0.59
  -7  -6   2    6.73    0.57
   7  -6  -2    7.75    1.61
   7  -6  -2    6.61    0.72
  -7  -6   2    6.59    0.44
  -7   6   2    7.34    0.42
  -8   4  -2   67.53    1.93
   8  -4   2   65.76    3.74
   8  -4   2   67.57    3.02
  -8  -4  -2   63.51    2.73
  -8  -4  -2   66.57    3.89
  -8   4  -2   65.79    2.23
  -8  -4  -2   66.66    1.93
  -8  -5   1  231.02    6.12
  -8  -5   1  204.75    5.86
  -8   5   1  216.08    5.77
  -8  -5   1  237.11    6.28
   8  -5  -1  224.72    6.48
   8   5  -1  259.85    7.63
  -8  -5   1  226.93    7.59
   8  -5  -1  229.27    8.75
   0   8  -4   84.35    2.52
   0   8  -4   81.50    2.47
   0  -8  -4   84.63    2.55
   0   8   4   86.69    2.45
   0  -8   4   84.88    2.41
   0  -8   4   85.82    3.01
   0   8  -4   87.14    2.47
  -4  -2  -6   73.27    2.12
   4  -2   6   74.42    2.08
  -4   2  -6   72.24    2.08
  -4  -2  -6   72.86    2.12
   4   2   6   75.64    2.13
  -4   2  -6   73.00    2.11
   4  -2   6   76.11    3.20
  -4   2  -6   75.80    2.25
  -4   2  -6   70.75    3.35
  -4  -2  -6   76.25    2.25
  -5   7  -3  113.45    4.23
  -5  -7  -3  114.58    3.17
   5  -7   3  118.71    4.99
  -5  -7  -3  115.32    3.15
  -5  -7  -3  109.42    3.02
  -5   7  -3  117.69    3.19
  -5  -7  -3  113.69    3.83
  -5   7  -3  113.28    3.13
   5  -4   5    1.80    1.20
  -5  -4  -5    1.82    0.29
  -5   4  -5    1.86    0.35
  -5  -4  -5    1.81    0.35
  -5   4  -5    1.96    0.29
  -5   4  -5    2.16    1.98
   5  -4   5    2.17    0.26
  -5  -1   6   88.17    2.52
  -5  -1   6   89.62    2.53
   5  -1  -6   91.58    2.91
   5  -1  -6   92.94    2.59
   5   1  -6   88.78    2.87
  -5   1   6   87.76    2.50
   5   1  -6   82.59    2.82
   5   1  -6   92.30    3.10
   5  -1  -6   93.66    3.62
   4   7  -4  130.93    3.99
   4  -7  -4  143.78    3.99
   4   7  -4  134.83    3.73
  -4   7   4  139.82    3.72
   4  -7  -4  139.64    4.23
  -4  -7   4  134.84    4.21
  -4   7   4  141.37    4.03
  -4  -7   4  137.52    3.77
   1   8  -4  348.71    9.09
   1  -8  -4  337.85    8.74
  -1   8   4  345.93    8.83
  -1  -8   4  326.41    8.40
   1   8  -4  337.06    8.84
   1  -8  -4  340.91    8.97
  -1  -8   4  343.70    9.43
   0   5  -6   55.56    1.70
   0  -5  -6   55.63    1.78
   0  -5  -6   57.41    2.01
   0  -5  -6   56.10    1.68
   0   5  -6   54.72    2.96
   0   5   6   55.06    1.67
   0  -5   6   54.62    2.68
   0   5   6   52.39    1.58
   0   5  -6   56.01    1.75
   0   5  -6   56.95    2.04
   6   2   5   46.96    1.45
  -6  -2  -5   49.73    1.52
  -6  -2  -5   48.74    1.53
  -6  -2  -5   50.73    1.52
  -6   2  -5   49.86    1.51
   6  -2   5   52.66    1.56
  -6   2  -5   48.62    1.53
   1   5  -6  391.88   10.07
  -1   5   6  382.30    9.75
  -1   5   6  380.91    9.81
  -1   5   6  366.11    9.38
   1   5  -6  393.24   10.41
   1  -5  -6  390.69    9.97
   1  -5  -6  386.98   10.35
  -1  -5   6  376.03   10.99
   1   5  -6  363.82   10.78
   1  -5  -6  383.39    9.94
   1   5  -6  355.27    9.32
  -9   3   0    0.97    0.40
  -9  -3   0    0.44    0.22
  -9   3   0    1.13    0.27
  -9  -3   0    1.99    1.48
   9  -3   0    0.58    0.82
  -9  -3   0    0.63    0.25
   9  -3   0    1.87    1.95
   9   3   0   -0.42    0.90
  -3   6  -5   17.81    0.78
  -3  -6  -5   17.75    0.78
   3  -6   5   17.54    1.55
  -3   6  -5   17.36    0.70
  -3  -6  -5   18.44    0.82
  -3   6  -5   17.71    2.47
  -3  -6  -5   17.68    0.76
  -1   8  -4    2.88    0.38
   1  -8   4    3.22    0.83
   1   8   4    3.22    0.32
  -1  -8  -4    2.98    0.45
   1  -8   4    3.04    0.33
  -1   8  -4    2.38    0.59
  -1  -8  -4    3.13    0.40
   0   0  -7   -0.41    0.80
   0   0  -7   -0.17    0.34
   0   0   7   -0.09    0.17
   0   0  -7   -0.15    0.25
  -8   0   4   11.28    0.70
   8   0  -4   13.06    1.82
  -5   6  -4  286.45    9.60
  -5   6  -4  314.71    8.08
  -5  -6  -4  315.06    8.09
  -5  -6  -4  314.19    8.85
  -5   6  -4  298.07    7.71
  -5  -6  -4  302.10    7.81
   5  -6   4  312.82    9.22
   5  -6   4  289.10    8.58
  -5  -6  -4  305.99    7.92
   7  -3   4  341.06    8.71
   7  -3   4  367.07   10.49
   7   3   4  330.90    8.57
  -7  -3  -4  357.17    9.10
  -7   3  -4  342.71    8.75
  -7  -3  -4  370.10    9.52
   7  -3   4  326.09    9.71
  -7  -3  -4  326.55    9.59
  -7   3  -4  363.69    9.35
  -6  -7  -2   68.59    2.95
  -6  -7  -2   83.27    2.40
  -6   7  -2   78.92    3.06
  -6  -7  -2   76.38    2.20
  -6  -7  -2   76.07    2.20
   6  -7   2   81.98    4.66
   6  -7   2   80.09    2.91
  -6   7  -2   84.48    2.44
  -8   5  -1   24.10    0.84
   8  -5   1   27.10    3.16
  -8  -5  -1   23.36    0.89
  -8  -5  -1   22.05    2.48
  -8  -5  -1   23.86    0.87
  -8   5  -1   22.93    1.03
   8  -5   1   24.58    1.59
   1   0  -7   -0.34    0.32
   1   0  -7   -0.57    0.76
  -1   0   7   -0.08    0.18
   1   0  -7   -0.28    0.30
  -7   4   4    3.49    0.55
  -7   4   4    3.69    0.33
   7   4  -4    2.66    1.63
   7  -4  -4    2.84    0.45
   4   8  -3    0.12    0.44
   4  -8  -3   -0.04    0.69
  -4  -8   3   -0.02    0.18
   4   8  -3    0.22    0.26
  -4  -8   3    0.16    0.59
   4  -8  -3   -0.59    0.39
   4  -8  -3    0.30    0.22
  -4   8   3    0.84    0.36
  -4  -8   3   -0.18    0.20
  -4   8   3    0.64    0.19
   9  -2  -2   99.42    3.79
  -9  -2   2   87.53    3.08
  -9  -2   2  107.56    3.04
  -9   2   2   98.70    2.74
   9  -2  -2   94.74    5.15
   9   2  -2  104.16    5.14
   5   8  -2  441.20   11.20
  -5   8   2  432.54   10.97
  -5  -8   2  421.25   10.77
   5  -8  -2  413.52   11.72
   5  -8  -2  426.54   11.17
  -5   8   2  427.70   10.89
  -5  -8   2  441.43   11.53
   5  -8  -2  440.45   11.25
  -5  -8   2  412.20   10.64
   3  -9  -2   11.29    1.05
  -3   9   2   11.12    0.60
  -3  -9   2   10.70    0.50
   3  -9  -2   11.71    0.74
  -3   9   2    9.87    0.73
   3   9  -2   10.90    0.57
  -3   9   2   10.76    0.50
   3  -9  -2   10.95    0.53
  -3  -9   2   11.39    0.82
  -9  -3   1  147.21    4.02
  -9   3   1  144.10    3.85
   9  -3  -1  140.21    4.81
   9   3  -1  144.69    5.37
  -9  -3   1  136.04    4.84
  -9   0  -2  120.85    3.92
   9   0   2  114.43    3.20
  -9   0  -2  118.16    3.20
   1   5   6   71.49    2.08
  -1  -5  -6   73.21    2.32
   1  -5   6   69.80    3.13
  -1   5  -6   72.70    3.82
  -1   5  -6   73.78    2.17
  -1  -5  -6   74.28    2.21
  -1   5  -6   72.47    2.11
   0   1  -7   12.17    0.70
   0  -1   7   11.96    0.53
   0  -1  -7   14.52    1.40
   0   1  -7   10.54    1.13
   0   1   7   12.02    0.53
   0  -1  -7   12.12    0.71
   0   1   7   11.08    0.55
   0   1  -7   12.08    0.63
   0  -1  -7   11.98    0.63
   4  -9   0  153.79    4.06
  -4   9   0  156.26    4.14
  -4  -9   0  154.84    4.29
   4   9   0  161.56    4.27
  -4  -9   0  155.87    4.14
  -4   9   0  151.88    4.11
   4  -9   0  156.87    6.14
  -4  -9   0  154.88    4.28
  -4   9   0  153.56    4.28
   4  -9   0  160.41    4.64
   8   1  -4   39.13    2.95
  -8  -1   4   40.15    1.36
  -8  -1   4   39.66    1.44
  -8   1   4   39.75    1.44
   8  -1  -4   38.48    2.52
  -8   1   4   39.06    1.32
   1   1  -7  536.43   13.66
   1  -1  -7  520.94   13.31
   1   1  -7  505.31   13.06
   1   1  -7  533.22   14.44
   1  -1  -7  523.36   13.53
  -1   1   7  529.77   13.49
  -1   1   7  494.76   12.53
  -1   1   7  510.64   12.93
  -1  -1   7  508.20   12.86
   1  -1  -7  522.26   14.52
  -7   0   5    0.36    0.28
   7   0  -5   -0.85    0.77
  -7   0   5   -0.07    0.28
   0   7  -5   14.08    0.72
   0   7  -5   14.29    0.68
   0  -7   5   14.22    0.62
   0  -7  -5   14.41    0.75
   0   7  -5   13.92    0.62
   0   7   5   15.73    0.66
   0   7  -5   14.02    1.70
   0   7  -5   14.86    0.84
   0  -7  -5   13.29    0.64
   0  -7   5   14.74    1.31
   5   5  -5   34.02    2.50
  -5   5   5   38.23    1.40
   5  -5  -5   34.09    1.21
  -5  -5   5   36.78    2.07
   5   5  -5   34.99    1.28
   5   5  -5   34.08    1.53
  -5   5   5   35.06    1.15
  -7   5  -3   -0.10    0.22
  -7   5  -3    0.27    0.28
  -7  -5  -3   -1.19    0.85
   7  -5   3   -1.07    1.24
  -7  -5  -3   -0.02    0.17
   7  -5   3    0.03    1.01
   0  -9   3  115.95    3.64
   0   9  -3  108.22    3.12
   0  -9  -3  114.52    3.36
   0  -9  -3  115.35    3.26
   0   9   3  119.56    3.27
   0   9  -3  122.99    3.39
   0  -9   3  117.75    3.27
   0   9   3  104.22    2.92
  -6   5  -4    5.79    1.80
   6  -5   4    6.65    1.05
  -6  -5  -4    6.64    0.42
  -6   5  -4    7.18    0.42
  -6  -5  -4    6.34    0.40
  -7  -6  -2  111.25    4.34
  -7  -6  -2  116.42    2.86
  -7  -6  -2  115.30    2.82
  -7  -6  -2  116.25    2.85
   7  -6   2  116.92    3.77
  -7   6  -2  120.28    2.90
   7  -6   2  114.17    5.23
  -7   6  -2  113.62    3.06
   5   2  -6   32.10    1.47
   5  -2  -6   33.21    1.46
  -5   2   6   31.60    1.14
   5  -2  -6   33.68    1.93
   5  -2  -6   29.90    1.01
  -5   2   6   33.34    1.07
  -5  -2   6   31.25    1.06
   5   2  -6   32.52    1.46
   5   2  -6   33.70    1.44
  -2  -8   4    0.49    0.25
  -2  -8   4   -0.50    0.63
   2   8  -4    0.33    0.34
  -2   8   4    0.14    0.16
   2  -8  -4    0.44    0.36
   2   8  -4    0.09    0.32
  -2   8   4    0.40    0.21
   2  -8  -4    0.79    0.55
  -9   1  -2  207.55    5.43
  -9  -1  -2  215.13    4.96
  -9   1  -2  212.28    4.88
   9   1   2  194.47    4.62
   9   1   2  206.18    5.94
  -9  -1  -2  203.67    5.68
  -1   0  -7   -0.42    0.29
   1   0   7    0.06    0.17
  -1   0  -7   -0.00    0.25
   2  -5  -6    0.37    0.45
   2   5  -6    0.28    0.66
   2   5  -6    0.41    0.48
  -2  -5   6    0.29    0.89
   2  -5  -6    0.68    0.28
  -2   5   6    0.73    0.23
   2   5  -6    0.38    0.37
   2   5  -6    0.85    0.29
   2  -5  -6    0.85    0.49
  -2   5   6    0.54    0.20
  -2   5   6    0.71    0.21
  -3  -9  -2  113.41    2.92
  -3   9  -2  112.00    2.74
  -3   9  -2  107.60    2.97
  -3  -9  -2  114.77    2.93
   3  -9   2  103.38    5.26
  -3   9  -2  108.19    2.74
   3  -9   2  108.78    3.20
  -8   3  -3   10.21    0.47
  -8   3  -3    9.73    0.83
  -8  -3  -3    9.82    0.46
   8  -3   3   10.49    1.38
  -8  -3  -3    9.91    1.18
   8  -3   3   10.14    1.29
  -3  -4  -6  352.50    8.07
   3  -4   6  352.80    9.44
  -3   4  -6  354.07    8.00
   3   4   6  347.60    7.92
  -3   4  -6  354.18   10.37
  -3   4  -6  360.76    8.14
  -3  -4  -6  365.39    8.29
  -3   4  -6  358.80    8.18
   1   9  -3    0.35    0.34
   1  -9  -3    0.48    0.50
  -1  -9   3    0.49    0.52
   1   9  -3    0.95    0.27
  -1   9   3    0.61    0.25
  -1  -9   3    0.61    0.23
  -1   9   3    0.32    0.16
   1   9  -3   -0.04    0.26
  -7   1   5   14.78    0.67
   7   1  -5   14.40    1.38
   7  -1  -5   13.90    0.73
   7  -1  -5   13.92    1.30
  -7   1   5   14.37    0.68
  -7  -1   5   11.31    0.59
   7  -1  -5   15.47    1.12
  -4   9   1  164.19    3.87
  -4  -9   1  156.33    3.98
   4  -9  -1  162.76    4.16
   4  -9  -1  156.97    3.70
  -4  -9   1  156.62    3.70
  -4   9   1  167.26    4.10
   4  -9  -1  158.61    5.09
   4   9  -1  161.71    3.81
   0  10   0  403.25    9.07
   0  10   0  374.12    8.86
   0  10   0  398.58    8.98
   0 -10   0  381.87    9.76
   0 -10   0  387.92    9.01
   0 -10   0  370.70    8.27
   2   0  -7   -0.04    0.73
   2   0  -7    0.15    0.32
  -2   0   7   -0.03    0.17
  -2   0   7   -0.08    0.19
   2   0  -7   -0.22    0.47
  -4  -7  -4   52.68    1.50
  -4   7  -4   56.37    1.62
   4  -7   4   54.24    2.46
  -4   7  -4   50.47    2.72
  -4  -7  -4   55.19    1.58
  -4   7  -4   54.59    1.50
   4  -7   4   53.22    2.35
   9   3   1   75.62    2.83
  -9  -3  -1   65.36    4.01
   9  -3   1   71.08    2.93
   9  -3   1   80.90    4.29
  -9   3  -1   67.25    2.08
  -9  -3  -1   66.59    2.73
  -9  -3  -1   68.62    1.81
  -9   3  -1   67.51    1.76
  -1   9  -3  113.12    2.79
  -1  -9  -3  111.40    2.85
  -1  -9  -3  106.57    2.82
  -1   9  -3  111.85    2.88
   1   9   3  114.89    2.82
  -1   9  -3  103.43    2.79
   1  -9   3  113.27    3.32
   1  -1   7   57.24    1.52
   1   1   7   57.32    1.52
  -1   1  -7   56.38    1.69
  -1   1  -7   59.17    1.65
  -1  -1  -7   57.51    1.72
  -1  -1  -7   56.25    1.61
   1   1   7   55.74    1.54
  -5  -8  -2   22.82    0.87
  -5   8  -2   23.25    0.83
  -5   8  -2   21.71    0.74
  -5   8  -2   24.44    1.36
  -5  -8  -2   23.92    1.39
  -5  -8  -2   23.40    0.85
   5  -8   2   26.18    2.97
  -1   7  -5  108.63    2.73
   1  -7   5  104.89    3.55
  -1   7  -5  105.51    2.74
  -1  -7  -5  102.09    2.65
  -1   7  -5   91.69    4.18
  -1   7  -5  108.79    2.69
   1  -7   5  100.22    2.52
   8   4  -3   86.55    4.27
   8  -4  -3   79.33    2.47
  -8  -4   3   76.77    2.08
  -8   4   3   83.05    2.11
  -8  -5   2    2.36    0.34
   8  -5  -2    3.12    1.60
   8   5  -2    2.16    0.71
  -8   5   2    2.74    0.29
   8  -5  -2    2.06    0.53
  -8   5   2    2.60    0.32
  -8  -5   2    1.91    0.49
  -4   6   5  269.54    6.13
  -4  -6   5  270.53    7.29
   4  -6  -5  273.90    6.66
   4  -6  -5  272.68    6.31
   4   6  -5  272.20    6.37
  -4   6   5  276.52    6.51
   4   6  -5  287.42    7.11
  -4   8  -3   18.15    0.73
   4  -8   3   16.82    1.09
  -4  -8  -3   18.12    0.75
  -4   8  -3   18.01    1.24
   4  -8   3   19.44    2.00
  -4  -8  -3   17.74    0.74
  -4   9  -1  541.51   12.00
   4  -9   1  501.18   15.04
  -4   9  -1  530.94   12.16
  -4   9  -1  519.49   11.59
  -4  -9  -1  524.04   11.78
  -4  -9  -1  520.23   11.71
   4  -3   6    0.58    1.01
  -4   3  -6   -0.02    1.22
  -4  -3  -6   -0.16    0.27
   4  -3   6    0.03    0.18
  -4  -3  -6    0.25    0.26
  -4   3  -6   -0.19    0.28
  -4   3  -6    0.29    0.23
  -4   3  -6    0.14    0.20
   4   3   6    0.07    0.13
  -2  -1   7   68.55    1.79
   2   1  -7   71.70    2.70
   2  -1  -7   68.72    2.88
   2  -1  -7   69.53    2.16
  -2   1   7   64.24    1.71
   2   1  -7   71.43    2.17
   2  -1  -7   74.18    2.08
   2   1  -7   71.21    2.00
  -2  -1   7   65.85    1.74
  -2   1   7   71.28    1.86
   1 -10   0   16.73    0.97
  -1 -10   0   14.22    1.09
   1 -10   0   15.08    0.57
  -1  10   0   14.67    0.65
   1 -10   0   14.38    1.35
  -1  10   0   15.25    0.62
  -1 -10   0   14.77    0.56
  -1 -10   0   14.61    0.98
  -1  10   0   14.32    0.67
   1  10   0   15.20    0.62
   1  10   0   15.16    0.65
  -6   4   5   51.27    1.46
   6  -4  -5   51.11    1.56
   6   4  -5   51.28    1.51
   6  -4  -5   53.72    2.11
   6   4  -5   48.07    2.74
  -6   4   5   54.43    1.74
  -2  -8  -4  234.33    5.52
  -2   8  -4  238.07    6.57
  -2  -8  -4  237.12    5.48
   2  -8   4  261.09    7.03
   2   8   4  253.67    5.82
   2  -8   4  223.77    5.95
  -2   8  -4  239.64    5.62
   0  -2   7   39.92    1.15
   0   2   7   39.11    1.18
   0   2   7   38.89    1.12
   0  -2  -7   38.57    1.34
   0  -2  -7   39.16    2.09
   0   2  -7   37.34    1.29
   0   2  -7   36.76    1.75
   0  -2  -7   40.87    1.29
   0   2  -7   38.77    1.21
  -8  -2   4  159.55    3.88
   8  -2  -4  161.73    5.32
   8   2  -4  148.05    6.18
  -8  -2   4  153.74    3.86
   8  -2  -4  156.95    4.42
  -8   2   4  171.46    4.10
  -6   3  -5   30.85    0.96
   6  -3   5   30.65    0.93
   6   3   5   30.04    0.99
  -6  -3  -5   29.11    0.97
  -6   3  -5   30.18    1.00
  -6  -3  -5   31.28    1.00
  -6  -3  -5   30.33    0.94
  -1   2   7    7.97    0.47
   1   2  -7    8.01    0.51
   1  -2  -7    7.15    1.07
   1  -2  -7    7.96    0.63
   1   2  -7    9.15    0.95
  -1   2   7    8.26    0.42
  -1  -2   7    7.90    0.42
   1   2  -7    7.29    0.59
   1  -2  -7    7.68    0.55
  -2   7   5  398.29    8.87
  -2  -7   5  412.17    9.31
   2   7  -5  396.24    9.12
  -2   7   5  413.79    9.35
   2   7  -5  411.85    9.54
  -2  -7   5  381.10    9.54
   2  -7  -5  423.26    9.78
   2  -7  -5  398.08    9.00
   0 -10   1  257.68    5.84
   0 -10  -1  260.11    6.19
   0  10  -1  256.18    6.13
   0  10  -1  268.54    6.17
   0  10   1  263.21    6.04
   0 -10   1  253.14    6.16
   0 -10   1  236.41    7.74
   0  10   1  248.09    5.78
   0  10  -1  257.98    5.95
   0 -10  -1  247.82    6.25
   4   4  -6  260.45    6.29
  -4   4   6  269.57    6.24
  -4   4   6  259.01    6.06
   4  -4  -6  249.19    6.05
  -4  -4   6  258.84    7.22
   4  -4  -6  255.81    5.88
   4   4  -6  256.30    6.31
  -7  -7   0   20.89    1.05
  -7  -7   0   19.66    0.72
  -7  -7   0   19.32    0.78
   7  -7   0   21.28    2.83
  -7   7   0   20.87    0.72
   7  -7   0   21.45    1.21
  -7  -7   0   21.13    0.83
  -7   7   0   19.56    0.84
  -7  -7   0   14.31    0.62
  -9  -2  -2  346.47    7.79
   9   2   2  305.88    7.01
   9  -2   2  341.78    9.07
   9   2   2  397.65   10.01
   9  -2   2  357.00    9.93
  -9   2  -2  354.57    7.95
  -9  -2  -2  336.53    8.84
  -9   2  -2  329.20    7.95
  -2   5  -6   -0.13    1.22
  -2   5  -6    0.49    0.29
  -2  -5  -6    0.64    0.35
   2  -5   6    0.87    0.80
  -2   5  -6    0.38    0.23
  -2  -5  -6    0.20    0.30
  -5   0  -6  351.35    7.94
  -5   0  -6  306.70    6.96
  -5   0  -6  382.33    8.68
   5   0   6  376.55    8.45
  -2   9   3   65.98    1.79
  -2  -9   3   63.35    2.15
  -2   9   3   63.30    1.78
  -2  -9   3   58.40    1.60
   2   9  -3   65.15    2.06
   2   9  -3   59.77    1.70
   2   9  -3   64.91    1.81
  -2   9   3   62.57    1.65
   2  -9  -3   65.31    1.91
   2  -9  -3   65.55    2.16
  -7  -2   5   27.26    0.96
   7  -2  -5   29.33    1.71
  -7   2   5   30.45    1.04
   7  -2  -5   28.05    1.63
   7  -2  -5   22.08    0.92
   7   2  -5   27.96    1.98
  -9   0   3   -0.13    0.27
   9   0  -3   -0.96    1.89
  -9   0   3    0.73    0.51
  -9  -3   2   52.79    1.56
   9  -3  -2   47.39    2.16
   9  -3  -2   48.96    3.62
   9   3  -2   51.38    3.09
  -9  -3   2   51.67    2.10
   1  10  -1  207.77    4.89
  -1  10   1  212.45    4.92
  -1 -10   1  211.56    4.86
   1 -10  -1  207.11    4.77
   1 -10  -1  201.36    5.43
  -1  10   1  202.88    4.80
   1  10  -1  213.49    4.96
  -1 -10   1  207.40    5.14
   1 -10  -1  203.90    4.98
   1  10  -1  185.16    4.82
  -6  -8   0   28.11    0.94
  -6  -8   0   25.45    0.86
   6  -8   0   28.14    2.79
  -6  -8   0   28.83    1.04
   6  -8   0   28.01    1.32
  -6   8   0   28.70    0.89
  -1  10  -1  596.44   13.22
   1 -10   1  576.56   12.73
  -1  10  -1  578.66   12.92
   1 -10   1  536.31   15.19
  -1 -10  -1  555.89   12.78
   1 -10   1  589.91   13.56
   1  10   1  598.47   13.26
   1  10   1  565.14   12.66
  -1  10  -1  550.22   12.35
  -1 -10  -1  596.56   13.43
  -1   2  -7   27.63    1.50
   1   2   7   25.37    0.86
  -1   2  -7   24.79    0.96
  -1   2  -7   24.39    0.87
   1  -2   7   25.28    0.81
   1   2   7   25.02    0.80
  -1  -2  -7   25.17    1.00
  -1   2  -7   23.85    0.88
  -1  -2  -7   26.08    0.95
  -7  -7   1    5.07    0.54
  -7   7   1    5.39    0.36
   7  -7  -1    5.08    0.74
   7  -7  -1    3.20    1.64
  -7  -7   1    5.62    0.48
  -7   7   1    5.26    0.45
  -7  -7   1    5.26    0.40
  -5   1  -6    1.74    0.26
  -5  -1  -6    1.67    0.32
  -5   1  -6    1.51    0.32
   5   1   6    1.74    0.23
   5  -1   6    1.61    0.22
  -5   1  -6    1.52    0.29
  -5  -1  -6    1.70    0.25
  -2   0  -7    0.16    0.23
  -2   0  -7    0.33    0.27
   2   0   7    0.11    0.15
  -2   0  -7    0.04    0.29
  -9  -1   3  101.48    2.90
   9  -1  -3   96.51    4.71
  -9   1   3   99.78    2.54
  -9  -1   3  108.09    2.76
   9   1  -3  101.70    5.21
   6  -7  -3  212.29    5.02
  -6   7   3  212.69    4.89
  -6  -7   3  209.16    5.33
   6   7  -3  211.92    4.90
   6  -7  -3  218.83    6.25
  -6   7   3  213.06    4.92
  -6   7   3  178.88    4.79
   6  -7  -3  213.77    5.23
  -6  -7   3  209.28    5.02
   2  -9   3   18.44    1.70
  -2   9  -3   17.42    0.94
  -2  -9  -3   17.70    0.81
   2   9   3   18.20    0.68
   2  -9   3   15.26    1.08
  -2   9  -3   17.42    0.73
  -2  -9  -3   18.11    0.79
  -2   9  -3   17.16    0.67
   6  -6  -4  155.25    4.56
  -6  -6   4  144.46    3.62
  -6   6   4  157.36    3.71
   6  -6  -4  145.06    3.67
  -6   6   4  156.21    4.12
   6   6  -4  154.36    3.67
   2  -2  -7    0.26    0.44
   2   2  -7    0.79    0.33
   2   2  -7    0.18    0.43
   2  -2  -7    0.63    0.42
   2  -2  -7   -0.00    0.76
  -2   2   7    0.27    0.22
  -2  -2   7    0.26    0.19
   2   2  -7    1.62    0.71
  -2   2   7    0.32    0.23
   5  -3  -6  243.06    6.01
  -5   3   6  232.49    5.46
  -5   3   6  233.26    5.53
   5   3  -6  233.38    5.98
   5   3  -6  215.80    5.59
   5  -3  -6  235.73    5.45
   5   3  -6  239.41    5.84
  -3   8   4   14.06    0.68
   3   8  -4   14.98    0.70
   3   8  -4   13.71    0.85
   3  -8  -4   13.62    0.73
  -3   8   4   13.56    0.53
  -3  -8   4   12.69    0.59
   3  -8  -4   13.75    0.93
  -3  -8   4   15.03    1.07
  -3   5   6   21.80    0.79
   3   5  -6   21.59    0.98
   3   5  -6   21.67    0.98
  -3  -5   6   21.34    1.59
  -3   5   6   22.58    0.85
   3   5  -6   23.13    1.08
   3  -5  -6   20.79    0.77
   3   5  -6   24.84    1.44
  -9  -4   0   15.18    2.00
  -9   4   0   15.08    0.60
  -9  -4   0   14.95    0.65
   9  -4   0   14.20    1.27
  -9   4   0   14.64    0.73
  -9  -4   0   14.15    0.59
   9   4   0   17.26    1.27
   9  -4   0   16.91    2.79
  -2  -7  -5   34.24    1.08
   2  -7   5   32.28    1.87
  -2   7  -5   35.44    1.09
  -2  -7  -5   33.70    1.13
  -2   7  -5   30.31    2.56
  -2   7  -5   35.58    1.18
  -2  10   0  259.60    6.03
  -2 -10   0  272.33    6.17
   2 -10   0  242.17    7.21
  -2  10   0  268.88    6.25
  -2 -10   0  254.27    6.06
   2 -10   0  270.05    6.51
   2 -10   0  262.86    5.95
  -2  10   0  261.29    5.97
   2  10   0  277.95    6.33
   6  -8  -1   38.67    1.15
  -6   8   1   40.21    1.14
   6  -8  -1   39.28    1.52
  -6  -8   1   40.95    1.38
   6  -8  -1   40.06    2.79
  -6   8   1   39.71    1.24
  -6  -8   1   41.13    1.22
  -2  -1  -7  168.56    4.03
  -2   1  -7  168.29    4.04
  -2   1  -7  165.35    4.05
  -2   1  -7  163.41    3.91
  -2  -1  -7  163.64    4.01
   2  -1   7  166.06    3.87
   2   1   7  164.27    3.83
  -2   1  -7  170.73    4.90
   8  -5   2   82.91    4.18
  -8  -5  -2   69.36    1.81
  -8   5  -2   73.24    1.87
  -8  -5  -2   72.44    2.81
   8  -5   2   69.62    2.83
  -8  -5  -2   59.77    3.54
  -8  -5  -2   70.95    1.84
  -8   5  -2   66.81    2.06
  -3   0   7    0.06    0.20
  -3   0   7   -0.01    0.23
   3   0  -7    0.13    0.38
   3   0  -7    0.12    0.45
   3   0  -7    1.05    0.77
  -7  -4  -4    3.69    0.36
  -7  -4  -4    3.58    0.36
  -7   4  -4    3.52    0.38
  -7  -4  -4    3.43    0.28
  -7   4  -4    3.49    0.32
   7  -4   4    1.59    1.13
   7  -4   4    3.05    0.96
   7  -6  -3    7.47    1.44
  -7  -6   3    5.09    0.48
   7  -6  -3    7.17    0.67
  -7   6   3    6.62    0.39
   7  -6  -3    5.71    0.41
  -7   6   3    5.98    0.38
   5  -5   5  147.93    4.92
  -5  -5  -5  146.95    3.58
  -5   5  -5  131.87    5.88
  -5  -5  -5  146.09    3.54
  -5   5  -5  143.46    3.42
  -9  -4   1   37.22    2.16
   9   4  -1   39.76    2.08
   9  -4  -1   43.02    1.99
   9  -4  -1   42.26    3.73
  -9  -4   1   46.34    1.41
   7  -7   1   48.97    3.84
  -7  -7  -1   54.73    1.59
  -7  -7  -1   53.54    1.49
   7  -7   1   50.51    2.03
  -7  -7  -1   53.33    1.53
  -7  -7  -1   48.38    3.10
   4  -9  -2   32.39    1.23
   4  -9  -2   31.60    1.79
   4   9  -2   29.20    0.94
  -4  -9   2   31.43    1.27
   4  -9  -2   31.10    0.99
  -4   9   2   31.12    0.95
  -4  -9   2   28.98    0.92
  -8   0  -4    3.24    0.40
   8   0   4    2.88    0.30
  -8   0  -4    3.02    0.29
   5  -7  -4    0.61    0.41
  -5   7   4    0.65    0.36
  -5   7   4    0.66    0.20
   5  -7  -4    0.35    0.74
  -5  -7   4    2.86    0.68
  -5  -7   4    0.58    0.28
   5   7  -4    2.04    0.34
  -4   6  -5   19.57    2.48
  -4  -6  -5   24.78    0.91
  -4  -6  -5   25.43    0.91
  -4   6  -5   24.28    0.83
   4  -6   5   24.80    1.80
  -4   6  -5   23.97    0.88
  -3  -1   7    0.29    0.21
  -3   1   7    0.38    0.23
   3   1  -7    0.68    0.41
  -3   1   7    0.27    0.21
  -3  -1   7    0.59    0.24
   3  -1  -7    0.25    0.76
   3  -1  -7    0.74    0.44
   3  -1  -7    0.38    0.49
   3   1  -7    0.18    0.48
   3   1  -7    0.46    0.64
  -8   6   0   63.03    1.81
   8  -6   0   65.66    2.36
   8  -6   0   62.44    4.23
  -8  -6   0   69.92    1.93
  -8  -6   0   63.94    1.77
  -8  -6   0   50.51    1.81
   6  -8   1   15.66    1.12
  -6  -8  -1   13.85    0.63
  -6  -8  -1   15.51    0.64
  -6  -8  -1   15.65    0.75
   6  -8   1   14.53    2.74
  -6   8  -1   15.03    0.59
  -6   8  -1   14.87    1.01
  -2 -10   1   19.92    1.00
  -2  10   1   19.18    0.70
  -2 -10   1   19.39    0.68
  -2  10   1   19.13    0.76
   2 -10  -1   20.31    1.44
   2 -10  -1   18.30    0.65
  -2  10   1   19.58    0.76
   6   0  -6   33.73    1.03
   6   0  -6   34.96    1.61
  -6   0   6   34.20    1.10
   6   0  -6   37.07    1.61
   0   3   7  118.03    2.91
   0  -3   7  123.22    4.15
   0   3   7  124.84    2.99
   0   3  -7  119.84    3.00
   0   3  -7  127.03    3.69
   0  -3  -7  127.52    3.36
   0   3  -7  122.14    3.17
   0  -3  -7  120.04    3.02
   0   3  -7  128.50    4.26
  -8  -1  -4   11.07    0.60
  -8   1  -4    9.16    0.45
  -8  -1  -4    8.91    0.44
   8  -1   4    8.95    0.45
   8   1   4    9.03    0.48
  -8   1  -4   10.34    0.58
  -8  -3   4   44.29    1.35
   8  -3  -4   47.10    2.54
  -8   3   4   46.84    1.35
   8  -3  -4   48.98    1.74
   8   3  -4   48.40    3.62
  -5  -2  -6    5.02    0.33
  -5  -2  -6    5.60    0.43
   5  -2   6    5.25    1.18
  -5  -2  -6    5.19    0.41
  -5   2  -6    5.82    0.45
   5   2   6    5.49    0.33
   5  -2   6    6.13    0.35
  -5   2  -6    5.38    0.37
  -8  -4  -3   59.04    1.57
   8  -4   3   58.50    2.73
   8  -4   3   54.54    2.83
  -8  -4  -3   48.78    2.31
  -8   4  -3   57.97    1.55
   2 -10   1    1.30    1.55
   2 -10   1    0.45    0.20
  -2 -10  -1    0.39    0.44
  -2  10  -1    0.71    0.25
  -2  10  -1    0.45    0.22
  -2 -10  -1    0.68    0.43
  -2  10  -1    0.28    0.32
   2  10   1    0.77    0.24
   2 -10   1    1.32    0.63
   1  -3  -7 1024.67   37.05
  -1   3   7  972.69   21.40
  -1  -3   7 1011.67   37.46
   1   3  -7  973.91   21.45
   1  -3  -7 1003.85   36.14
  -1   3   7  971.71   21.26
   1  -3  -7  976.99   22.87
   1   3  -7  951.86   21.59
   1   3  -7  975.86   21.66
  -3   7   5  153.08    5.74
   3   7  -5  159.63    6.16
   3  -7  -5  151.46    5.67
   3   7  -5  147.31    5.58
   3  -7  -5  151.01    5.82
  -3   7   5  151.99    5.61
  -3  -7   5  143.65    5.94
  -8   6   1   74.83    2.98
  -8   6   1   85.88    3.25
  -8  -6   1   80.36    3.15
   8  -6  -1   79.29    5.05
   8  -6  -1   83.50    3.58
  -8  -6   1   71.42    3.05
  -8  -6   1   83.42    3.28
   7  -5  -4   35.78    1.65
   7   5  -4   34.53    2.80
  -7   5   4   32.69    1.66
  -7   5   4   30.49    1.29
   9  -2  -3    2.09    1.69
   9   2  -3   -0.18    1.76
  -9  -2   3   -0.21    0.36
  -9  -2   3    0.13    0.27
   9  -2  -3   -0.26    0.52
  -3   8  -4  152.29    5.70
  -3   8  -4  149.02    6.33
   3  -8   4  153.75    6.27
   3  -8   4  148.26    6.24
  -3  -8  -4  150.98    5.66
  -3   8  -4  143.04    5.32
  -3  -8  -4  144.44    5.39
  -5  -8   3  188.86    7.02
   5   8  -3  184.06    6.78
   5  -8  -3  184.16    6.94
  -5   8   3  187.02    6.87
  -5   8   3  177.49    6.87
   5  -8  -3  197.11    7.88
  -5   8   3  185.52    6.80
  -5  -8   3  192.05    7.37
   5  -8  -3  179.93    6.69
   9  -4   1    1.52    0.88
   9  -4   1    3.53    2.00
  -9   4  -1    2.42    0.29
  -9  -4  -1    2.49    0.30
  -9   4  -1    2.33    0.46
  -9  -4  -1    1.33    1.82
  -9  -4  -1    2.74    0.32
   6   1  -6   55.08    2.60
  -6   1   6   54.06    2.19
   6   1  -6   55.14    2.45
   6  -1  -6   57.33    2.27
   6  -1  -6   59.84    2.75
  -6  -1   6   48.91    2.03
  -6   1   6   56.00    2.24
   6  -1  -6   58.60    3.01
   6   1  -6   53.87    2.23
  -9  -3  -2  132.75    4.93
   9  -3   2  123.66    5.97
  -9  -3  -2  115.00    5.13
  -9   3  -2  124.50    4.92
   9  -3   2  123.36    5.50
  -9   3  -2  130.39    4.84
  -7   0  -5   -0.11    0.25
   7   0   5    0.30    0.21
  -7   0  -5    0.25    0.20
   4  -9   2  139.57    5.55
  -4   9  -2  169.99    6.31
   4  -9   2  164.91    8.25
  -4  -9  -2  179.45    6.69
  -4  -9  -2  169.39    6.32
  -4   9  -2  170.50    6.29
  -4   9  -2  157.96    6.13
  -2   2  -7   80.50    3.11
   2   2   7   84.70    3.25
  -2   2  -7   71.37    3.40
  -2  -2  -7   80.20    3.11
   2   2   7   78.02    2.96
  -2   2  -7   83.49    3.29
   2  -2   7   78.09    2.97
  -2  -2  -7   81.33    3.22
  -2   2  -7   83.62    3.24
   0  -6  -6   -0.01    0.29
   0  -6  -6   -0.08    0.40
   0  -6  -6    1.99    0.43
   0   6  -6    0.04    0.20
   0   6  -6   -0.04    0.34
   0  -6   6    0.93    0.98
   0   6   6    0.58    0.21
   0   6  -6    0.54    0.31
   0   6  -6   -0.29    1.31
  -3   9   3    0.25    0.23
   3  -9  -3    0.74    0.60
  -3  -9   3    0.66    0.53
  -3   9   3    0.30    0.18
  -3  -9   3    0.28    0.21
   3   9  -3    0.64    0.31
   3   9  -3    0.52    0.47
   3  -9  -3    0.42    0.31
   7   3  -5   56.29    3.44
  -7   3   5   60.98    2.42
   7  -3  -5   58.09    2.41
   7  -3  -5   64.06    3.12
  -1   6   6   10.98    0.56
  -1   6   6   11.46    0.64
   1   6  -6   10.99    0.75
   1   6  -6   10.92    0.84
  -1  -6   6   10.37    1.33
   1   6  -6   10.27    0.65
   1  -6  -6    9.86    0.84
   1  -6  -6   11.12    0.64
   1   6  -6   11.53    0.66
   1  -6  -6   11.56    0.78
   1   6  -6   10.41    1.83
   4  -4   6   16.08    1.69
  -4   4  -6   11.93    0.65
  -4  -4  -6   13.05    0.70
  -4   4  -6   14.60    2.09
  -4  -4  -6   13.42    0.73
  -4   4  -6   13.42    0.76
   0  10  -2   40.42    1.77
   0 -10   2   42.83    2.03
   0 -10  -2   44.72    2.06
   0 -10  -2   44.98    1.94
   0  10   2   44.93    1.83
   0  10  -2   45.91    1.88
   0  10   2   45.66    1.85
   0  10  -2   44.66    1.83
   5  -9   0    6.06    1.93
   5  -9   0    8.14    0.85
  -5   9   0    6.71    0.44
  -5   9   0    6.94    0.48
  -5   9   0    7.91    0.68
  -5  -9   0    7.07    0.59
   6  -7   3  163.14    7.48
  -6  -7  -3  144.70    6.08
  -6  -7  -3  163.33    6.07
  -6   7  -3  163.05    6.05
   6  -7   3  165.26    6.76
  -6   7  -3  169.79    6.26
  -6  -7  -3  163.33    6.04
  -6   7  -3  166.39    7.02
  -7  -1  -5   67.51    2.60
  -7   1  -5   68.73    2.65
   7  -1   5   62.98    2.44
  -7  -1  -5   62.96    2.49
  -7   1  -5   67.42    2.65
   7   1   5   64.44    2.51
  -1   3  -7   33.14    1.45
  -1  -3  -7   32.54    1.50
   1   3   7   33.35    1.41
  -1   3  -7   31.46    1.97
  -1   3  -7   31.38    1.36
   1   3   7   32.22    1.33
   1  -3   7   31.59    2.09
  -1   3  -7   32.98    1.50
  -7  -7   2  121.06    4.72
   7  -7  -2  121.46    4.82
  -7  -7   2  120.95    4.70
   7  -7  -2  120.64    5.75
  -7   7   2  123.12    4.58
  -7   7   2  121.14    4.55
  -3  -5  -6   60.79    2.43
  -3   5  -6   62.33    2.44
  -3   5  -6   62.28    4.12
   3  -5   6   58.27    3.22
  -3  -5  -6   62.09    2.52
  -3   5  -6   60.99    2.40
  -6   4  -5  498.05   17.98
   6   4   5  428.91   15.56
  -6  -4  -5  487.88   17.64
  -6  -4  -5  474.94   17.19
  -6   4  -5  484.55   17.55
   3   2  -7  199.01    7.73
  -3  -2   7  192.09    7.07
  -3   2   7  202.88    7.51
   3  -2  -7  203.30    8.33
   3  -2  -7  202.05    7.77
   3   2  -7  201.45    7.53
   3  -2  -7  203.01    7.59
   3   2  -7  212.73    8.08
  -8  -6  -1   24.26    2.61
  -8  -6  -1   24.23    1.09
   8  -6   1   17.35    3.07
  -8  -6  -1   26.36    1.18
  -8   6  -1   22.95    1.20
   8  -6   1   25.28    1.66
  -8   6  -1   24.57    1.06
  10   0   0  328.88   13.56
 -10   0   0  317.15   11.52
   2  -3  -7    6.85    0.64
   2  -3  -7    6.55    0.71
  -2   3   7    7.53    0.52
   2   3  -7    6.39    0.73
   2   3  -7    7.05    0.55
   2   3  -7    6.90    0.66
   2  -3  -7    6.67    1.13
  -2   3   7    6.88    0.46
  -1  10  -2  193.56    7.13
  -1 -10  -2  183.43    6.95
   1  10   2  171.67    6.39
  -1  10  -2  187.12    6.96
   1 -10   2  186.15    7.18
  -1  10  -2  187.41    6.99
  -1 -10  -2  192.30    7.19
   1  10   2  195.91    7.21
  -9   0  -3    0.28    0.21
   9   0   3   -0.07    0.24
  -9   0  -3    0.55    0.67
   1   6   6   11.11    0.62
  -1   6  -6    9.70    0.61
  -1  -6  -6   11.02    0.78
  -1   6  -6   10.68    0.60
   1  -6   6   10.98    1.43
  -1  -6  -6   10.39    0.61
  -1  -6  -6   10.45    0.68
  -1   6  -6    8.01    1.84
  -1   6  -6   10.84    0.70
  -8   2  -4   98.65    3.71
  -8  -2  -4   97.03    3.65
  -8  -2  -4  104.70    4.01
   8   2   4   90.64    3.49
   8  -2   4   97.72    4.49
  -8   2  -4  108.71    4.15
   8  -2   4  102.24    4.54
   8  -5  -3   11.31    0.85
  -8   5   3   10.49    0.58
   8  -5  -3   10.25    1.63
   8   5  -3   10.91    1.32
  10   0  -1   -1.73    1.70
 -10   0   1   -0.16    0.25
  -5  -9   1   53.02    2.10
   5  -9  -1   51.88    2.05
  -5  -9   1   49.99    2.14
   5  -9  -1   53.10    3.17
   5   9  -1   56.67    2.21
  -5   9   1   56.85    2.22
   5  -9  -1   55.32    2.43
  -6  -8   2  220.55    8.11
   6   8  -2  230.56    8.42
   6  -8  -2  221.81    8.37
   6  -8  -2  236.76    9.74
  -6   8   2  217.22    7.93
  -6  -8   2  229.97    8.62
  -6   8   2  216.63    7.95
   6  -8  -2  219.55    8.09
  -3  10   0    1.55    0.35
   3 -10   0    1.80    0.24
  -3  10   0    1.59    0.26
  -3 -10   0    1.65    0.48
  -3  10   0    1.72    0.26
   3 -10   0    1.19    1.25
  -5   6   5  113.84    4.26
   5  -6  -5  121.72    4.64
   5   6  -5  102.07    4.20
  -5   6   5  112.11    4.36
   5  -6  -5  114.49    4.64
  -5  -6   5  107.28    4.74
   5   6  -5  115.27    4.40
   3  -9   3    6.98    1.58
  -3   9  -3    6.78    0.49
  -3  -9  -3    6.06    0.60
  -3   9  -3    6.39    0.45
   3  -9   3    5.55    0.86
  -3  -9  -3    5.99    0.50
  -3   9  -3    6.12    0.73
  -3   0  -7   -0.18    0.21
  -3   0  -7    0.08    0.29
   3   0   7   -0.02    0.17
  -3   0  -7   -0.11    0.27
 -10  -1   0   18.17    0.85
 -10   1   0   19.13    0.89
  10   1   0   20.49    2.06
  10  -1   0   18.77    2.47
   7  -6   3   -0.85    0.87
  -7   6  -3   -0.01    0.22
   7  -6   3    0.45    1.28
  -7  -6  -3   -0.04    0.92
  -7  -6  -3    0.07    0.23
  -7   6  -3   -0.35    0.25
  -7  -6  -3   -0.11    0.24
   9   4  -2    0.60    1.00
  -9  -4   2    1.19    0.34
   9  -4  -2    2.01    0.67
  -6   6  -4  106.72    4.01
  -6   6  -4  101.83    3.87
  -6  -6  -4   97.95    3.71
  -6  -6  -4  107.21    4.04
   6  -6   4  108.67    4.92
  -6  -6  -4  102.45    3.89
   6   5  -5  322.04   11.75
  -6   5   5  313.17   11.40
   6   5  -5  315.24   13.60
   6  -5  -5  333.88   12.23
  -6   5   5  326.69   12.06
   6  -2  -6   12.17    1.01
   6  -2  -6   13.18    1.27
  -6   2   6   12.47    0.71
   6   2  -6   13.94    1.17
   6  -2  -6   13.37    0.73
   6   2  -6   12.99    0.83
  -3  -7  -5    5.05    0.47
  -3   7  -5    6.49    1.54
   3  -7   5    6.42    1.11
  -3   7  -5    5.04    0.47
  -3  -7  -5    5.39    0.44
  -3   7  -5    5.42    0.44
  -9   1  -3   27.45    1.63
  -9  -1  -3   27.52    1.83
   9   1   3   27.26    1.22
  -9  -1  -3   27.72    1.18
  -9   1  -3   26.92    1.14
   9  -1   3   30.26    1.98
  -2  -6   6   11.79    1.36
   2  -6  -6    9.93    0.60
   2   6  -6   11.13    1.62
   2   6  -6   11.63    0.72
  -2   6   6   11.33    0.63
   2   6  -6   12.81    0.85
  -2   6   6   11.34    0.64
   2   6  -6   10.67    1.02
   2  -6  -6   12.21    0.85
  -2   6   6   10.98    0.57
  -5   7  -4    0.67    0.28
   5  -7   4   -0.08    0.86
  -5   7  -4    0.77    1.12
  -5  -7  -4    0.61    0.28
   5  -7   4   -0.16    0.89
  -5  -7  -4    0.53    0.32
  -5   7  -4    0.55    0.28
  10   1  -1   46.82    3.44
  10  -1  -1   51.33    4.01
 -10  -1   1   48.80    1.97
 -10   1   1   48.86    1.96
   3   1   7  179.51    6.58
  -3   1  -7  184.79    6.83
  -3   1  -7  187.62    6.94
   3  -1   7  166.81    6.13
  -3  -1  -7  187.00    6.93
  -3   1  -7  184.88    6.89
  -3  -1  -7  184.30    6.86
  -3  -1  -7  187.02    6.92
   5  -9   1   29.96    3.24
  -5  -9  -1   33.52    1.50
  -5  -9  -1   33.13    1.45
  -5   9  -1   33.64    1.40
   5  -9   1   30.29    1.67
  -5   9  -1   32.08    1.38
  -5   9  -1   35.55    1.73
  -5  -8  -3    0.81    0.53
  -5  -8  -3    0.50    0.28
  -5  -8  -3    0.63    0.34
  -5   8  -3    0.67    0.26
   5  -8   3    1.06    1.46
  -5   8  -3    1.42    0.71
   4   5  -6  102.56    4.03
   4  -5  -6  106.34    4.04
   4   5  -6  108.58    4.39
  -4   5   6  104.09    4.00
   4   5  -6  104.62    4.36
  -4   5   6  103.97    3.94
  -4  -5   6  100.29    4.67
   5   4  -6  588.87    5.83
   5  -4  -6  579.50    3.30
   5  -4  -6  588.76    4.66
  -5   4   6  555.28   20.17
  -5   4   6  574.89   20.81
   5   4  -6  577.93    4.03
   4   8  -4    1.09    0.54
  -4  -8   4    0.37    0.23
   4  -8  -4    0.39    0.66
  -4   8   4    0.55    0.17
  -4  -8   4    0.65    0.59
  -4   8   4    0.99    0.30
   4  -8  -4    0.31    0.39
   4   8  -4    0.54    0.33
   4   0  -7    0.01    0.68
  -4   0   7    0.08    0.21
  -4   0   7    0.03    0.21
   4   0  -7    0.18    0.45
   4   0  -7   -0.88    0.46
  -7  -2  -5    5.78    0.43
   7  -2   5    5.57    0.39
  -7  -2  -5    5.53    0.39
  -7   2  -5    6.38    0.48
  -7  -2  -5    5.64    0.44
  -7   2  -5    6.02    0.41
   7  -2   5    5.60    1.12
   7   2   5    5.95    0.42
  -3  10   1  280.59   10.29
  -3 -10   1  238.47    8.70
  -3  10   1  280.45   10.21
   3 -10  -1  252.45    9.30
  -3 -10   1  266.61    9.91
   3 -10  -1  275.56   10.94
  -3  10   1  267.66    9.79
  -5   3  -6    0.55    0.23
  -5  -3  -6    0.97    0.30
  -5   3  -6    0.89    0.32
  -5  -3  -6    0.99    0.27
   5  -3   6    1.14    1.04
   5   3   6    0.75    0.19
  -8   6   2    0.42    0.23
   8  -6  -2   -0.03    0.52
   8  -6  -2   -1.04    1.18
  -8  -6   2    0.11    0.39
   9  -3  -3    1.54    0.66
  -9  -3   3    2.16    0.38
   9   3  -3    3.27    1.66
   9  -3  -3    0.58    1.68
  -9   3   3    2.17    0.26
   2  10  -2    0.37    0.39
  -2 -10   2    0.19    0.19
  -2  10   2    0.70    0.27
  -2 -10   2   -0.47    0.50
  -2  10   2    0.29    0.23
   2  10  -2   -0.22    0.23
  -2  10   2    0.24    0.26
  -2  10   2    0.47    0.19
   2 -10  -2   -0.01    0.59
   7  -7   2    1.49    1.88
  -7  -7  -2   -0.23    0.29
  -7   7  -2   -0.12    0.27
  -7   7  -2    0.32    0.25
  -7  -7  -2    0.65    0.79
  -7  -7  -2    0.04    0.25
   7  -7   2    0.64    0.77
  10   0   1   -1.30    1.18
 -10   0  -1    0.17    0.23
   3 -10   1    3.75    0.72
  -3 -10  -1    4.76    0.48
   3 -10   1    3.67    1.96
  -3  10  -1    4.47    0.37
  -3 -10  -1    3.76    0.51
  -3  10  -1    3.22    0.47
  -3  10  -1    4.16    0.40
   4  -1  -7  231.90    9.35
  -4   1   7  238.04    8.74
   4   1  -7  237.01    9.18
   4  -1  -7  229.99    8.62
   4   1  -7  238.56    8.91
  -4  -1   7  187.52    6.94
   4  -1  -7  217.37    8.33
   4   1  -7  232.64    8.86
   2  -3   7  329.28   12.85
  -2  -3  -7  336.05   12.31
  -2   3  -7  348.91   12.76
   2   3   7  365.86   13.30
  -2   3  -7  342.93   12.47
   2   3   7  331.62   12.01
  -2   3  -7  343.72   12.52
  -2   3  -7  298.23   11.77
  -6   8  -2  384.36   13.98
  -6  -8  -2  396.38   14.40
  -6  -8  -2  368.18   14.20
   6  -8   2  401.40   16.86
  -6  -8  -2  388.64   14.11
   6  -8   2  383.02   14.38
  -2 -10  -2   31.96    1.50
   2 -10   2   31.63    3.07
  -2  10  -2   32.49    1.48
  -2  10  -2   36.29    1.56
   2 -10   2   35.60    1.78
  -2  10  -2   34.27    1.43
   2  10   2   34.36    1.43
  -2 -10  -2   33.80    1.53
   0  -9  -4    0.95    0.45
   0  -9   4    0.72    0.22
   0   9  -4    0.86    0.31
   0  -9   4    0.52    0.70
   0   9  -4    0.52    0.19
   0   9  -4    0.73    0.32
 -10   2   0  218.07    7.99
 -10  -2   0  215.61    7.91
  10  -2   0  195.41    8.03
  10  -2   0  191.92    9.20
  10   2   0  197.12    8.22
 -10  -1  -1  265.71    9.68
  10   1   1  263.26   10.54
  10  -1   1  275.35   11.41
 -10   1  -1  280.72   10.22
  -9  -5   0   57.01    2.29
  -9  -5   0   51.87    3.50
  -9   5   0   52.27    2.18
   9  -5   0   55.72    4.40
   9  -5   0   58.70    2.93
  -9   5   0   56.43    2.20
  -9  -2  -3   17.08    1.48
   9  -2   3   16.12    1.43
  -9  -2  -3   18.00    0.83
  -9   2  -3   16.50    0.78
   9  -2   3   16.10    1.60
  -9   2  -3   16.14    1.14
   9   2   3   14.57    0.76
   1  -9  -4    1.74    0.55
  -1  -9   4    1.12    0.23
   1   9  -4    1.38    0.38
  -1  -9   4    0.44    0.69
   1  -9  -4    1.62    0.43
   1   9  -4    1.43    0.32
  -1   9   4    1.35    0.20
  -2  -6  -6   18.95    0.96
  -2   6  -6   19.45    0.91
  -2   6  -6   18.39    2.38
  -2   6  -6   20.40    0.97
   2  -6   6   17.15    1.67
  -2   6  -6   18.98    0.96
   0  -4  -7   46.93    2.08
   0   4  -7   49.84    2.71
   0   4   7   43.75    1.79
   0   4   7   45.30    1.80
   0   4  -7   43.18    1.81
   0   4  -7   45.89    1.89
   0   4   7   41.04    1.72
   0  -4   7   40.63    2.48
   0   4  -7   45.05    1.95
   8   4  -4   11.88    2.19
   8  -4  -4   10.71    1.49
  -8   4   4   11.24    0.62
   8  -4  -4   11.14    0.83
 -10   2   1   89.48    3.39
  10  -2  -1   84.58    5.50
  10  -2  -1   90.22    4.19
  10   2  -1   92.69    4.89
 -10  -2   1   94.10    4.38
 -10  -2   1   90.01    3.45
  -3   3   7  418.48   15.21
   3  -3  -7  484.84   17.53
   3  -3  -7  439.28   16.28
   3   3  -7  476.79   17.50
  -3   3   7  470.45   17.09
   3   3  -7  466.50   17.00
   3  -3  -7  461.55   16.82
   3  -3  -7  447.73   17.09
   3   3  -7  445.78   16.46
  -7  -5  -4   93.63    3.56
   7  -5   4   95.19    4.42
  -7   5  -4   96.61    3.64
   7  -5   4  100.23    4.66
  -7  -5  -4   97.47    3.71
   1   4  -7    8.88    0.83
   1   4  -7    9.09    0.59
  -1  -4   7    8.45    1.21
   1   4  -7   10.62    1.04
  -1   4   7    8.49    0.48
   1  -4  -7    8.08    0.79
  -1   4   7    8.17    0.54
  -1   4   7    8.83    0.55
   1   4  -7    9.42    0.71
   4   7  -5  350.00   12.79
  -4   7   5  335.20   12.27
   4  -7  -5  349.79   12.98
  -4  -7   5  336.49   12.85
   4  -7  -5  340.72   12.47
  -4   7   5  360.21   13.05
   4   7  -5  362.09   13.47
   0   8  -5   16.82    1.28
   0  -8  -5   17.14    0.99
   0   8  -5   18.14    0.87
   0  -8   5   16.75    1.40
   0  -8  -5   16.28    0.86
   0   8  -5   16.85    0.93
   0   8  -5   19.67    0.97
  -3   2  -7   14.33    0.75
  -3   2  -7   14.82    0.77
   3  -2   7   14.53    0.69
   3   2   7   13.74    0.66
  -3  -2  -7   15.25    0.83
  -3   2  -7   14.79    0.82
   9  -5  -1  104.99    4.48
   9  -5  -1   99.39    5.94
   9   5  -1  120.66    5.15
  -9  -5   1  109.54    4.20
   1   8  -5  123.49    4.77
  -1   8   5  121.16    4.55
   1  -8  -5  124.99    4.72
   1  -8  -5  121.33    4.68
   1   8  -5  106.12    4.23
  -1   8   5  126.03    4.69
  -1  -8   5  121.33    5.09
 -10   0   2   27.86    1.23
  10   0  -2   29.04    3.18
  -9  -4  -2  288.61   10.50
  -9   4  -2  278.52   10.39
   9  -4   2  282.09   11.76
  -9  -4  -2  266.79   10.56
  -9   4  -2  291.90   10.60
   9  -4   2  294.51   11.66
  -8   0   5    0.20    0.30
   8   0  -5    0.12    1.01
  -8   0   5   -0.14    0.33
  -1   9  -4   13.87    0.91
  -1  -9  -4   13.24    0.76
  -1  -9  -4   13.10    0.84
   1  -9   4   13.19    1.20
  -1   9  -4   13.15    0.71
  -1   9  -4   13.74    0.78
  -8   3  -4    9.33    0.59
  -8  -3  -4    9.20    0.51
  -8  -3  -4    9.70    0.61
   8  -3   4    7.48    1.21
   8   3   4    7.85    0.52
   8  -3   4    8.43    1.17
  -8   3  -4    9.00    0.52
  -7   4   5   22.07    1.01
   7   4  -5   21.08    2.32
   7  -4  -5   24.79    1.70
   7  -4  -5   22.97    1.14
  -4   9   3  181.48    6.66
  -4  -9   3  185.83    7.16
   4  -9  -3  181.26    6.81
   4   9  -3  175.01    6.47
  -4   9   3  176.62    6.79
   4  -9  -3  184.41    7.32
   5  -9  -2   88.22    3.56
   5  -9  -2   85.91    3.30
  -5   9   2   85.57    3.24
   5  -9  -2   82.74    3.99
  -5  -9   2   79.45    3.04
   5   9  -2   79.34    3.12
  -5  -9   2   86.28    3.51
  -3   6   6    5.33    0.40
  -3   6   6    5.49    0.32
   3   6  -6    5.92    0.60
  -3  -6   6    5.25    1.08
   3   6  -6    5.25    0.50
   3  -6  -6    5.83    0.45
   3   6  -6    5.93    0.64
   3  -6  -6    5.27    0.69
  -6   0  -6  192.99    7.29
   6   0   6  192.43    7.26
  -6   0  -6  197.12    7.50
  -4   8  -4   36.35    0.77
   4  -8   4   37.66    1.71
   4  -8   4   35.31    1.86
  -4   8  -4   38.49    0.88
  -4   8  -4   37.94    1.94
  -4  -8  -4   37.16    0.83
  -4  -8  -4   38.29    0.89
  -6   3   6   25.56    0.74
   6   3  -6   24.44    1.38
   6   3  -6   24.71    0.83
   6  -3  -6   25.35    1.21
   6  -3  -6   25.52    0.74
 -10   1   2   42.49    1.77
  10  -1  -2   43.96    3.99
 -10  -1   2   41.79    1.77
  10   1  -2   41.18    3.51
   4   2  -7   46.30    2.22
   4   2  -7   46.00    2.22
   4  -2  -7   45.09    2.05
   4   2  -7   45.91    2.10
   4  -2  -7   42.43    2.11
  -4   2   7   44.72    1.88
   4  -2  -7   47.24    2.67
   4  -2  -7   47.65    1.95
   1   4   7   30.68    0.73
  -1  -4  -7   29.17    0.94
  -1   4  -7   28.60    1.74
  -1   4  -7   30.66    0.77
  -1   4  -7   30.32    0.89
   1   4   7   30.89    0.64
   1  -4   7   29.69    1.83
  -1   4  -7   30.59    0.80
  -8  -1   5   29.16    0.82
  -8   1   5   33.92    0.85
   8   1  -5   32.22    2.19
   8  -1  -5   33.17    1.92
  -1  -8  -5    4.09    0.49
  -1   8  -5    3.84    0.90
  -1   8  -5    4.33    0.32
  -1   8  -5    4.28    0.41
  -1   8  -5    4.05    0.33
   1  -8   5    3.61    0.98
   9   0  -4   17.48    2.26
  -9   0   4   18.68    0.81
   8  -5   3   62.61    3.64
  -8  -5  -3   59.33    2.39
  -8   5  -3   61.39    2.51
   8  -5   3   59.05    3.22
  -8   5  -3   62.38    2.48
   8  -6   2   41.74    2.46
  -8  -6  -2   40.64    1.70
  -8   6  -2   44.20    1.81
  -8  -6  -2   42.40    1.77
  -8  -6  -2   45.74    3.28
   8  -6   2   43.28    3.45
  -8  -6  -2   41.93    1.74
  -5  -6  -5   43.54    1.84
  -5   6  -5   46.04    1.89
  -5   6  -5   40.64    3.30
   5  -6   5   46.85    2.77
  -5   6  -5   44.56    1.89
   2   4  -7    0.46    0.52
  -2  -4   7   -0.17    0.81
   2   4  -7    0.39    0.43
  -2   4   7    0.28    0.24
   2  -4  -7    0.19    0.33
  -2   4   7    0.22    0.22
   2  -4  -7    0.54    0.55
   2  -4  -7    0.56    0.31
  -2   4   7    0.36    0.19
   2   4  -7    0.71    0.30
 -10   2  -1  173.01    6.55
 -10  -2  -1  165.26    6.27
  10  -2   1  165.98    7.10
  10   2   1  168.42    7.18
  -2  -9   4   10.27    0.46
   2   9  -4    9.97    0.67
   2  -9  -4   10.82    0.61
  -2  -9   4   11.25    0.91
  -2   9   4   10.60    0.40
   2  -9  -4   11.24    0.82
  -6  -1  -6   65.65    2.60
  -6   1  -6   68.43    2.71
  -6   1  -6   70.03    2.83
   6   1   6   64.70    2.56
  -6  -1  -6   67.06    2.71
   6  -1   6   68.08    2.68
  -6  -1  -6   62.33    2.50
  -9   5  -1   42.72    1.76
  -9  -5  -1   39.03    3.11
   9  -5   1   49.06    3.90
  -9  -5  -1   41.89    1.74
  -9  -5  -1   40.75    1.72
  -9   5  -1   38.02    1.04
   9  -5   1   42.69    2.50
  -7  -3  -5   11.16    0.48
  -7   3  -5   12.85    0.55
   7   3   5   11.17    0.48
  -7   3  -5   12.50    0.49
   7  -3   5   11.09    1.33
  -7  -3  -5   11.98    0.47
   9  -1  -4   24.25    2.28
  -9  -1   4   21.85    0.73
   9   1  -4   20.09    2.42
  -9  -1   4   19.22    0.81
   2  -8  -5   44.80    1.90
   2   8  -5   44.21    1.94
  -2  -8   5   42.66    2.31
  -2   8   5   46.09    1.93
   2   8  -5   44.76    2.05
  -2   8   5   43.69    1.78
   2  -8  -5   45.51    2.10
  -4  -5  -6   25.48    0.76
  -4   5  -6   23.63    2.63
  -4   5  -6   26.09    0.68
   4  -5   6   27.14    1.86
  -4  -5  -6   24.95    0.72
  -6   7   4    0.21    0.39
   6   7  -4   -0.06    0.22
  -6   7   4    0.21    0.21
  -3  10   2  101.54    3.92
   3 -10  -2   92.93    3.76
   3 -10  -2   96.40    4.28
  -3 -10   2   97.92    4.04
  -3  10   2   96.55    3.77
  -3  10   2   97.04    4.05
   7  -8   0   46.87    2.28
  -7   8   0   49.81    2.02
   7  -8   0   45.67    3.96
  -7  -8   0   43.35    1.85
  -7  -8   0   47.32    2.04
  -5   9  -2   11.33    0.46
  -5  -9  -2   11.01    0.57
   5  -9   2   11.51    2.39
  -5  -9  -2   10.34    0.49
  -5   9  -2   10.70    0.80
  -5   9  -2   10.49    0.46
  -4  10   0    5.84    0.48
  -4 -10   0    5.89    0.54
  -4  10   0    5.62    0.35
  -4  10   0    5.75    0.36
   4 -10   0    5.54    0.70
   4 -10   0    5.60    1.47
  -6   5  -5  140.10    5.34
  -6  -5  -5  137.17    5.27
  -6  -5  -5  129.01    4.98
  -7  -7   3  259.47    9.91
   7  -7  -3  280.62   10.75
  -7   7   3  275.85   10.33
   7  -7  -3  273.20   11.17
  -7   7   3  262.01    9.84
   7  -6  -4   79.17    3.29
   7  -6  -4   76.13    3.65
   7   6  -4   76.53    3.00
  -7   6   4   80.42    3.15
  -7   6   4   77.38    3.33
   7   6  -4   81.90    3.83
  -4   9  -3   11.67    0.47
  -4  -9  -3   12.21    0.57
  -4  -9  -3   11.63    0.58
  -4   9  -3   11.81    0.52
  -4   9  -3   11.56    0.89
   4  -9   3   10.64    1.63
   4  -9   3   11.82    1.07
  10   3   0  153.24    6.64
 -10   3   0  162.73    6.18
 -10  -3   0  154.66    5.91
  10  -3   0  151.82    6.63
   0 -10   3   20.14    1.08
   0  10   3   20.50    0.61
   0  10   3   20.27    0.62
   0  10  -3   21.80    0.67
   0 -10  -3   21.45    0.81
   0  10  -3   21.32    0.79
   0 -10  -3   20.88    0.90
  -2   9  -4   34.17    0.88
  -2  -9  -4   32.45    0.83
   2  -9   4   34.40    1.50
  -2  -9  -4   33.43    0.92
  -2   9  -4   32.23    1.29
  10   2  -2   53.55    3.81
  10  -2  -2   56.93    4.51
 -10  -2   2   48.26    2.42
 -10  -2   2   57.31    2.36
 -10   2   2   55.80    2.25
  10  -2  -2   58.00    3.00
   4   0   7    0.07    0.16
  -4   0  -7    0.19    0.30
  -4   0  -7   -0.27    0.24
  -4   0  -7   -0.17    0.25
   8  -2  -5   83.30    4.01
  -8   2   5   81.17    3.23
   8   2  -5   78.27    4.45
   8  -2  -5   77.41    3.89
   8  -2  -5   75.24    3.25
  -9   3  -3   51.38    2.07
  -9  -3  -3   47.46    2.72
   9  -3   3   48.30    2.83
  -9  -3  -3   52.53    2.12
   9  -3   3   48.06    2.78
   7  -8  -1   42.90    3.40
  -7  -8   1   38.67    0.83
  -7  -8   1   39.53    1.00
  -7   8   1   40.10    0.75
   7  -8  -1   41.04    2.02
  -3  10  -2  209.51    7.96
   3 -10   2  210.04    8.27
  -3  10  -2  208.21    7.86
  -3  10  -2  200.34    7.72
   3 -10   2  212.31   10.33
  -3 -10  -2  211.10    8.07
  -3 -10  -2  217.76    8.30
 -10  -3   1    2.64    0.36
 -10  -3   1    2.87    0.90
  10  -3  -1    2.62    0.81
  10   3  -1    3.01    0.92
 -10   3   1    3.33    0.31
  -4   7  -5  164.09    6.23
   4  -7   5  162.25    6.94
  -4   7  -5  170.87    6.54
  -4   7  -5  156.03    7.43
  -4  -7  -5  162.69    6.19
  -4  -7  -5  167.04    6.39
  -1 -10   3   78.88    3.42
   1 -10  -3   76.62    3.27
   1  10  -3   84.35    3.36
   1  10  -3   74.78    3.13
  -1  10   3   78.15    3.07
   8  -7   0   38.57    3.44
  -8   7   0   39.92    0.94
  -8  -7   0   48.14    2.04
   8  -7   0   43.93    2.25
  -8   7   0   45.00    1.84
  -8  -7   0   44.43    1.90
   9   4  -3    5.12    1.47
  -9   4   3    5.45    0.36
   9  -4  -3    5.13    1.76
  -9  -4   3    5.18    0.46
   9  -4  -3    5.87    0.72
  -3   3  -7   67.62    2.77
  -3  -3  -7   62.99    2.60
  -3   3  -7   63.78    2.57
   3  -3   7   65.65    3.41
   3   3   7   63.57    2.51
  -3   3  -7   60.69    2.46
  -6  -8   3   38.03    1.27
  -6   8   3   36.95    0.72
  -6  -8   3   33.15    0.87
   6  -8  -3   35.05    0.85
   6   8  -3   37.28    0.75
  -6   8   3   33.41    1.19
  -6   8   3   34.94    0.74
   6  -8  -3   36.06    1.77
   6  -8  -3   34.38    1.07
  -9  -5   2   12.50    0.59
  -9   5   2   12.45    0.44
   9  -5  -2   11.98    0.93
   9  -5  -2   11.63    2.35
   9   5  -2   12.49    1.15
   4 -10  -1    0.55    0.96
   4 -10  -1    1.08    0.19
  -4 -10   1    1.05    0.49
  -4  10   1    0.94    0.22
  -4 -10   1    0.97    0.22
   4 -10  -1    0.98    0.54
  -4  10   1    0.87    0.22
  -6  -2  -6    4.28    0.38
  -6  -2  -6    3.79    0.38
  -6   2  -6    3.51    0.37
  -6   2  -6    4.06    0.31
   6   2   6    4.05    0.29
  10   0   2   23.51    1.65
 -10   0  -2   20.55    0.57
  -4   1  -7  104.48    4.11
  -4  -1  -7  102.68    4.01
   4   1   7  104.35    4.01
  -4   1  -7  103.22    4.02
  -4  -1  -7  103.21    4.02
  -4   1  -7  101.84    3.96
  -4  -1  -7  104.57    4.11
   4  -1   7  101.53    3.90
  -2   8  -5   36.84    0.92
  -2  -8  -5   35.83    0.82
   2  -8   5   36.29    1.77
  -2   8  -5   35.94    2.01
  -2   8  -5   37.67    0.82
  -2  -8  -5   37.17    0.93
  -1  10  -3   57.43    2.41
  -1  10  -3   56.51    2.37
  -1  10  -3   54.23    2.21
  -1 -10  -3   57.11    2.46
   1  10   3   58.73    2.37
  -1 -10  -3   59.31    2.48
   1 -10   3   56.13    2.60
  -9  -2   4    3.44    0.41
  -9   2   4    4.04    0.36
   9  -2  -4    7.33    1.77
   9   2  -4    4.07    1.85
   2  -4   7    7.83    1.29
  -2  -4  -7    7.34    0.49
  -2   4  -7    6.79    1.29
   2   4   7    8.25    0.43
  -2   4  -7    7.24    0.40
  -2   4  -7    8.06    0.46
  -2  -4  -7    6.90    0.50
  -2   4  -7    7.17    0.49
  -3  -6  -6  111.18    4.35
   3  -6   6  117.84    5.47
  -3   6  -6  114.92    4.50
  -3   6  -6  109.80    4.26
  -3   6  -6  111.47    6.30
   8  -7  -1   55.44    4.12
   8  -7  -1   56.83    2.65
  -8   7   1   57.67    2.39
  -8  -7   1   53.13    2.23
  -8  -7   1   58.63    2.42
  -8   7   1   62.81    2.49
  -7   0   6    9.26    0.50
   7   0  -6    9.75    0.50
   7   0  -6   10.84    1.08
   7   0  -6    9.95    0.69
  -7   0   6    7.94    0.45
  -4 -10  -1  234.36    8.92
   4 -10   1  216.51   10.40
  -4  10  -1  239.57    9.00
  -4  10  -1  221.85    8.39
  -4  10  -1  224.56    8.61
  -5   5   6   13.42    0.52
   5   5  -6   12.83    0.61
  -5   5   6   12.55    0.59
   5   5  -6   13.12    0.90
   5  -5  -6   12.52    0.59
   5   5  -6   12.74    1.22
  -6   9   0  153.18    5.82
  -6  -9   0  152.47    5.91
   6  -9   0  148.60    5.98
   6  -9   0  141.88    7.32
  -7  -8  -1    7.56    0.42
   7  -8   1    3.34    2.43
  -7  -8  -1    6.96    0.52
  -7   8  -1    7.55    0.39
   7  -8   1    7.35    0.91
  -7  -8  -1    7.80    0.46
 -10   1  -2    4.95    0.34
 -10  -1  -2    5.77    0.35
  10   1   2    4.74    1.05
   5   0  -7   -0.22    0.56
  -5   0   7    0.22    0.24
   5   0  -7    0.57    0.59
   4   3  -7  100.63    4.18
  -4   3   7  101.82    4.01
   4  -3  -7  101.94    4.14
  -4   3   7  102.10    3.99
   4  -3  -7  106.90    4.89
   4   3  -7  103.29    4.21
   4   3  -7   99.84    4.17
   4  -3  -7  103.07    3.99
  -5  -8   4   14.35    0.99
   5  -8  -4   16.02    0.70
  -5   8   4   14.29    0.46
   5  -8  -4   16.46    1.13
  -5   8   4   14.23    0.71
   5   8  -4   13.79    0.53
  -5  -8   4   11.75    0.52
   8  -6  -3  111.16    4.56
   8  -6  -3  101.62    5.08
   8   6  -3  117.49    5.11
  -8   6   3  109.75    4.23
   0   7  -6   72.68    2.93
   0   7  -6   74.87    2.98
   0   7  -6   72.87    3.01
   0  -7   6   72.82    3.66
   0  -7  -6   72.98    3.00
   0   7  -6   65.35    4.27
   0   7   6   72.97    2.90
   0  -7  -6   70.09    2.78
  -3  -4   7  121.62    5.47
  -3   4   7  126.73    4.89
  -3   4   7  125.87    4.88
  -3   4   7  125.65    4.88
   3  -4  -7  106.04    4.44
   3   4  -7  123.56    4.89
   3   4  -7  122.61    4.96
   3  -4  -7  122.49    4.71
   3  -4  -7  129.42    5.13
   7  -1  -6   15.62    0.63
  -7   1   6   16.15    0.63
   7  -1  -6   14.94    1.22
   7   1  -6   13.70    1.21
   1  -7  -6   52.38    2.15
  -1   7   6   53.45    2.13
   1   7  -6   53.36    2.22
   1   7  -6   54.98    2.38
   1   7  -6   51.62    2.16
  -1  -7   6   52.25    2.86
   1   7  -6   50.25    3.59
  -1   7   6   50.91    2.06
   1  -7  -6   53.70    2.32
  -1   7   6   52.09    2.13
   0  11   0    0.05    0.19
   0 -11   0    0.17    0.50
   0  11   0    0.26    0.24
 -10  -3  -1  195.59    7.39
  10  -3   1  200.17    9.16
 -10   3  -1  202.89    7.64
  10  -3   1  193.12    8.15
  10   3   1  223.70    9.12
  -3   9   4   54.80    2.29
   3   9  -4   59.10    2.65
   3  -9  -4   58.54    2.67
  -3  -9   4   56.57    2.73
   3   9  -4   56.63    2.44
  -3  -9   4   56.99    2.34
   3  -9  -4   58.08    2.44
  -3   9   4   58.65    2.33
  -6   6   5   23.19    0.87
   6   6  -5   22.81    0.67
   6   6  -5   22.47    1.80
   6  -6  -5   20.42    1.23
  -6   6   5   22.66    0.60
   6  -6  -5   21.81    0.78
   5  -1  -7    8.60    1.06
   5   1  -7    9.54    0.83
   5  -1  -7    8.20    0.39
   5   1  -7    6.79    0.73
   5   1  -7    8.77    0.76
   5  -1  -7    8.11    0.75
  -8  -4  -4   85.15    3.34
   8  -4   4   84.52    4.04
  -8   4  -4   87.16    3.45
  -8  -4  -4   94.83    3.73
  -8   4  -4   85.45    3.32
   8  -4   4   84.02    4.19
  -6  -9   1   99.63    4.01
  -6   9   1  106.79    4.11
   6  -9  -1   99.66    5.25
  -6  -9   1   97.56    3.81
   6  -9  -1  104.96    4.33
   2 -10  -3  346.86   13.29
   2  10  -3  337.00   12.88
  -2 -10   3  363.98   13.91
   2  10  -3  315.68   11.87
  -2  10   3  343.56   12.88
   2 -10  -3  338.55   12.78
   8  -7   1  315.11   12.33
   8  -7   1  292.98   13.23
  -8  -7  -1  302.28   11.37
  -8  -7  -1  290.86   10.94
  -8  -7  -1  304.30   11.40
  -3   8   5    1.01    0.17
   3  -8  -5    1.57    0.64
   3   8  -5    1.16    0.49
  -3   8   5    1.39    0.26
   3  -8  -5    0.60    0.42
   3   8  -5    1.66    0.37
  -3  -8   5    2.01    0.85
   4  -6  -6   40.22    0.91
   4   6  -6   43.02    2.07
   4   6  -6   40.91    1.83
  -4  -6   6   40.14    1.94
   4   6  -6   39.93    1.96
  -4   6   6   41.37    1.79
   4  -6  -6   38.32    1.24
   4   6  -6   42.26    2.60
  -4   6   6   41.96    1.74
   1 -11   0   -0.24    0.96
   1  11   0    0.13    0.24
  -1  11   0    0.05    0.20
   1 -11   0   -0.36    0.52
   1  11   0   -0.08    0.17
  -1  11   0   -0.25    0.21
  -1  11   0    0.12    0.21
  -6   4   6    0.78    0.24
   6   4  -6    0.98    0.31
   6  -4  -6    1.07    0.77
   6   4  -6    0.70    0.69
   6  -4  -6    0.51    0.30
  -4  -2  -7    0.05    0.28
  -4   2  -7    0.11    0.25
  -4   2  -7   -0.02    0.22
   4  -2   7    0.17    0.17
  -4   2  -7    0.24    0.24
   4   2   7    0.30    0.16
  -1   7  -6   11.55    0.61
  -1  -7  -6   10.82    0.57
  -1  -7  -6   10.76    0.66
  -1   7  -6   11.34    0.48
  -1   7  -6   11.64    0.55
  -1   7  -6   14.01    2.11
   1  -7   6   12.68    1.37
   0   5  -7  364.78   13.68
   0   5   7  353.85   13.38
   0  -5  -7  372.70   14.00
   0   5  -7  376.30   15.22
   0   5  -7  371.26   13.90
   0   5   7  352.19   13.18
   0  -5   7  348.54   13.94
   0  -5  -7  390.78   14.84
   8  -5  -4  101.65    4.20
  -8   5   4  102.33    3.96
   8   5  -4  105.07    5.40
  -1   5   7  432.31   16.18
   1   5  -7  443.92    2.97
   1  -5  -7  463.61    2.65
   1  -5  -7  383.03   14.39
   1  -5  -7  441.08    4.21
  -1  -5   7  418.75   16.55
  -1   5   7  464.44    2.98
   1   5  -7  437.62    6.39
  -1   5   7  445.18    2.53
   5   7  -5   31.17    0.82
   5  -7  -5   30.49    0.89
   5   7  -5   27.95    1.15
  -5   7   5   29.48    0.88
   5  -7  -5   30.36    1.33
  -5   7   5   31.45    0.68
  -7   7  -3   56.64    2.28
   7  -7   3   56.20    2.96
  -7  -7  -3   55.33    2.24
   7  -7   3   57.31    3.68
  -7  -7  -3   55.69    2.27
  -7   7  -3   58.02    2.37
  -6   9  -1   12.61    0.47
   6  -9   1   10.56    0.92
  -6   9  -1   12.40    0.53
   6  -9   1   11.30    2.64
  -6  -9  -1   11.98    0.61
  -6   7  -4   25.85    0.64
   6  -7   4   26.68    1.74
  -6  -7  -4   24.96    0.70
  -6   7  -4   25.15    0.70
  -6  -7  -4   24.14    0.66
 -10   0   3   -0.20    0.21
  10   0  -3   -0.37    1.97
   2 -10   3   13.80    1.04
  -2 -10  -3   13.40    0.67
  -2  10  -3   13.33    0.52
   2  10   3   14.38    0.51
  -2 -10  -3   12.63    0.65
  -2  10  -3   12.61    0.65
  -2  10  -3   13.48    0.57
   0 -11  -1   81.97    3.65
   0 -11   1   82.83    3.22
   0 -11   1   82.57    3.48
   0 -11  -1   81.82    3.37
   0  11  -1   84.87    3.51
   0  11   1   84.88    3.36
   0  11  -1   79.61    3.16
   0  11  -1   83.68    3.30
   0  11   1   86.59    3.40
  10  -2   2   20.93    1.43
  10  -2   2   21.58    1.82
 -10  -2  -2   21.84    0.59
  10   2   2   22.56    1.45
 -10   2  -2   21.57    0.58
  10   3  -2   68.22    4.02
  10  -3  -2   70.00    4.95
  10  -3  -2   68.27    3.48
 -10  -3   2   74.10    2.99
  -6   8  -3    0.00    0.24
   6  -8   3   -0.80    0.87
  -6  -8  -3   -0.19    0.54
  -6   8  -3    0.16    0.23
  -6  -8  -3   -0.04    0.23
   6  -8   3    1.13    1.29
   9  -5   2    3.19    1.71
   9  -5   2    1.75    1.03
  -9   5  -2    2.52    0.30
  -9  -5  -2    3.50    0.31
  -9  -5  -2    3.12    0.29
  -7  -4  -5   12.88    0.51
  -7   4  -5   14.01    0.55
  -7   4  -5   13.97    0.49
  -7  -4  -5   14.76    0.54
   7  -4   5   15.11    1.52
   8   3  -5    8.48    1.99
   8  -3  -5   12.16    1.38
  -8   3   5   10.56    0.51
   8  -3  -5   10.62    0.64
   2   7  -6   39.17    1.05
  -2   7   6   40.12    0.73
  -2   7   6   40.97    1.74
   2  -7  -6   42.92    1.97
  -2  -7   6   41.10    2.44
  -2   7   6   40.99    1.74
   2   7  -6   41.00    1.90
   2  -7  -6   42.16    1.79
   2   7  -6   32.60    2.39
   2   7  -6   42.34    1.92
  -7   8   2  218.01    8.20
   7  -8  -2  208.82    9.23
   7  -8  -2  222.10    8.63
  -7   2   6  278.46   10.51
   7  -2  -6  287.77   10.88
   7  -2  -6  276.62   11.20
   7  -2  -6  272.39   10.72
   7   2  -6  288.28   11.64
   7  -5  -5  120.96    3.20
  -7   5   5  133.82    3.28
   7   5  -5  131.83    7.03
   1  11  -1   81.71    2.27
   1  11  -1   86.80    2.25
   1 -11  -1   86.15    2.48
   1 -11  -1   89.79    3.11
   1  11  -1   78.21    2.47
  -1  11   1   87.09    2.28
  -1  11   1   88.51    2.27
  -1 -11   1   80.81    2.05
  -1 -11   1   88.66    2.60
 -10  -1   3   43.05    1.33
  10  -1  -3   39.73    3.39
 -10   1   3   43.33    1.30
  10   1  -3   44.20    3.51
  -3  -9  -4   41.63    1.35
  -3   9  -4   38.12    1.71
   3  -9   4   39.43    1.89
  -3  -9  -4   41.28    1.28
  -3   9  -4   41.89    1.31
   9  -6   0  130.88    4.06
   9  -6   0  131.92    6.22
  -9  -6   0  138.76    3.48
   6   3   6   48.38    1.40
   6  -3   6   44.63    2.36
  -6  -3  -6   47.99    1.44
  -6   3  -6   48.65    1.45
  -6  -3  -6   45.65    1.35
  -6   3  -6   47.56    1.35
  -1 -11  -1   -0.28    0.49
  -1  11  -1    0.36    0.25
  -1  11  -1   -0.00    0.22
   1  11   1    0.09    0.20
   1  11   1    0.20    0.20
  -1  11  -1    0.38    0.25
   5  -9  -3  613.45   14.89
   5  -9  -3  607.96   14.08
   5   9  -3  606.85   13.70
  -5   9   3  603.01   14.13
  -5   9   3  640.88   14.41
  -5  -9   3  640.62   14.95
   5  -2  -7   22.08    0.77
  -5   2   7   21.89    0.84
   5   2  -7   24.48    1.20
   5  -2  -7   22.02    1.54
   5  -2  -7   21.99    1.09
   5   2  -7   24.09    1.15
   5   2  -7   20.37    1.17
  -8   0  -5   -0.04    0.26
  -8   0  -5    0.28    0.20
   8   0   5   -0.01    0.18
   1   5   7    3.47    0.32
  -1  -5  -7    4.27    0.52
   1  -5   7    2.04    1.06
  -1  -5  -7    3.40    0.38
   1   5   7    4.06    0.32
  -1   5  -7    1.63    1.16
  -1   5  -7    3.66    0.36
  -1   5  -7    4.55    0.38
  -4  10   2    5.33    0.32
  -4 -10   2    5.37    0.61
   4 -10  -2    5.87    1.06
   4 -10  -2    5.39    0.60
  -9   0  -4   24.74    0.81
   9   3  -4    3.46    1.98
  -9  -3   4    0.40    0.31
   9  -3  -4    0.22    0.50
  -9   3   4    0.51    0.26
   9  -3  -4   -0.01    1.41
  -7   6  -4    7.08    0.43
  -7   6  -4    7.39    0.40
   7  -6   4    5.85    1.25
   7  -6   4    7.36    1.27
  -7  -6  -4    6.85    0.41
  -8  -7   2    7.10    0.54
   8  -7  -2    7.24    0.72
  -8   7   2    7.77    0.40
   8  -7  -2    8.96    1.99
 -10  -4   0    0.09    0.25
 -10   4   0    0.17    0.23
  10  -4   0    0.01    0.90
  10  -4   0   -0.13    2.19
 -10  -4   0   -0.19    1.06
  10   4   0    1.06    0.79
   9  -6  -1  235.62    6.25
   9  -6  -1  219.39    8.24
  -9   6   1  248.18    5.77
  -9  -6   1  257.04    6.13
  -2   5   7   48.02    1.37
   2   5  -7   45.48    1.44
  -2  -5   7   44.97    2.33
  -2   5   7   48.38    1.42
   2   5  -7   48.90    1.71
  -2   5   7   48.37    1.42
   2   5  -7   46.57    2.17
   2  -5  -7   43.26    1.68
   2  -5  -7   47.00    1.35
  -8  -1  -5   98.47    2.55
  -8  -1  -5   98.94    2.48
   8   1   5   97.06    2.48
  -8   1  -5   99.00    2.55
  -8   1  -5   98.98    2.48
   3  -8   5   19.55    1.53
  -3   8  -5   21.05    0.84
  -3  -8  -5   20.82    0.85
  -3   8  -5   18.91    1.65
  -3   8  -5   20.64    0.78
  -3  -8  -5   19.99    0.80
   2 -11   0  159.62    4.19
   2  11   0  161.77    3.89
  -2  11   0  150.43    3.64
   2 -11   0  146.01    3.50
  -2  11   0  156.61    3.89
  -2  11   0  151.90    3.74
   2 -11   0  152.75    5.41
  -2 -11   0  147.98    3.84
   9  -4   3    1.17    1.04
  -9  -4  -3   -0.03    0.20
  -9   4  -3    0.08    0.22
   9  -4   3    0.39    0.91
  -9  -1  -4   -0.27    0.18
  -9   1  -4    0.20    0.24
   9   1   4    0.12    0.23
  -9   1  -4    0.20    0.22
  -5  -8  -4   90.16    2.33
   5  -8   4   94.28    3.25
  -5   8  -4   94.11    2.39
  -5  -8  -4   91.82    2.40
  -5   8  -4   89.06    3.42
   5  -8   4   94.23    3.58
  -5   8  -4  101.51    2.63
 -10   4   1   41.45    1.21
 -10  -4   1   43.74    1.34
  10  -4  -1   36.23    1.94
  10   4  -1   40.99    2.09
  -3  -4  -7    3.56    0.38
   3  -4   7    4.89    1.24
  -3   4  -7    4.14    0.44
  -3  -4  -7    4.35    0.43
  -3   4  -7    3.83    0.34
  -3   4  -7    3.99    0.37
  -4  10  -2   12.35    0.48
   4 -10   2    9.68    2.38
  -4  10  -2   11.19    0.52
  -4 -10  -2   10.91    0.56
   4 -10   2   12.57    0.98
  -4 -10  -2   11.82    0.63
  -4  10  -2   10.80    0.71
  -2   7  -6  174.53    4.30
   2  -7   6  173.61    5.43
  -2  -7  -6  174.48    4.28
  -2   7  -6  180.08    4.34
  -2   7  -6  163.26    3.94
  -2   7  -6  156.50    6.34
  -8   6  -3   38.99    1.15
   8  -6   3   39.79    2.17
  -8   6  -3   40.01    1.24
   8  -6   3   41.59    2.64
  -8  -6  -3   37.53    1.13
  -8  -6  -3   37.91    1.15
  -3  10   3   30.94    0.95
   3 -10  -3   29.21    1.12
   3  10  -3   29.15    1.31
   3 -10  -3   28.99    1.44
  -3 -10   3   32.50    1.43
  -6   9   2    2.54    0.28
  -6  -9   2    2.72    0.50
   6  -9  -2    3.48    1.35
   6  -9  -2    2.35    0.59
   6   9  -2    2.80    0.28
  10   2  -3   -0.73    1.62
 -10  -2   3   -0.11    0.30
  10  -2  -3   -0.53    1.79
   7  -8   2  152.04    6.31
  -7  -8  -2  162.79    3.96
  -7  -8  -2  162.49    3.94
  -7   8  -2  168.91    4.11
   7  -8   2  161.73    4.70
   2 -11  -1   99.21    3.52
  -2  11   1   92.82    2.49
  -2 -11   1   96.31    2.72
  -2  11   1   97.82    2.53
  -2  11   1   98.93    2.52
   2 -11  -1   89.91    2.59
   5 -10   0   12.02    0.85
  -5 -10   0   12.83    0.68
   5 -10   0   12.17    2.13
  -5  10   0   13.54    0.57
  -5  10   0   13.82    0.60
   0   0  -8    3.79    0.48
   0   0   8    4.61    0.31
   0   0  -8    4.38    0.42
  -9  -6  -1    2.19    0.30
   9  -6   1    2.46    1.00
   9  -6   1    2.95    2.29
  -9  -6  -1    2.21    0.33
  -9   6  -1    2.03    0.28
  -4   3  -7    2.63    0.39
   4  -3   7    4.02    1.12
  -4   3  -7    3.06    0.32
  -4   3  -7    3.31    0.34
  -4  -3  -7    3.77    0.40
  -4  -3  -7    3.34    0.36
  -1   0   8    4.76    0.31
   1   0  -8    5.13    0.46
   1   0  -8    5.05    0.55
   4   4  -7   19.07    0.97
   4  -4  -7   19.43    1.01
  -4   4   7   18.68    0.74
  -4   4   7   18.65    0.76
   4  -4  -7   17.86    0.70
   4   4  -7   17.51    0.94
  -5  -5  -6   36.71    1.18
  -5   5  -6   37.06    1.13
  -5  -5  -6   35.75    1.14
   5  -5   6   37.84    2.24
  -2  11  -1  120.87    2.99
  -2  11  -1  120.53    3.09
  -2  11  -1  123.44    3.13
   2  11   1  130.66    3.20
  -2 -11  -1  128.88    3.37
   2 -11   1  124.10    3.45
   9   5  -3    1.22    0.88
  -9   5   3    1.81    0.28
  -9  -5   3    2.13    0.38
   9  -5  -3    1.50    0.51
  -4   6  -6   -0.19    0.32
   4  -6   6   -0.04    1.09
  -4   6  -6   -0.07    0.25
  -4   6  -6   -0.17    1.74
  -4  -6  -6    0.34    0.33
  -5   9  -3    4.40    0.71
   5  -9   3    3.00    1.53
  -5  -9  -3    4.60    0.46
  -5   9  -3    5.09    0.38
  -5  -9  -3    4.39    0.38
 -10  -4  -1   64.69    1.74
  10  -4   1   66.85    2.91
 -10   4  -1   68.71    1.80
  10  -4   1   66.21    3.75
   3  -7  -6    4.09    0.53
  -3   7   6   -0.14    0.14
   3  -7  -6    1.62    0.67
   3   7  -6    0.11    0.34
   3   7  -6    0.20    0.36
  -3  -7   6   -1.46    0.76
  -3   7   6    0.05    0.21
   0   1  -8   24.10    0.98
   0  -1  -8   24.03    1.01
   0   1   8   24.15    0.79
   0   1  -8   25.17    0.93
   0  -1   8   23.14    0.77
   0  -1  -8   23.52    0.88
   4   9  -4   11.12    0.52
   4  -9  -4   10.83    0.65
  -4  -9   4    8.74    0.83
   4   9  -4    9.80    0.78
  -4   9   4    9.91    0.38
   4  -9  -4   10.48    1.01
  -4   9   4   10.35    0.55
 -10   3  -2   16.57    0.61
 -10  -3  -2   18.52    0.69
  10  -3   2   18.41    1.55
  10  -3   2   14.06    1.91
  -8   2  -5   -0.10    0.22
   8   2   5   -0.07    0.20
  -8  -2  -5   -0.08    0.27
  -8   2  -5   -0.10    0.29
   8  -2   5    0.17    0.96
   1   1  -8  191.68    4.66
   1  -1  -8  191.68    4.67
   1   1  -8  192.49    4.86
   1  -1  -8  194.77    4.94
  -1   1   8  181.14    4.29
  -9   2  -4    0.12    0.25
   9   2   4    0.39    0.25
   9  -2   4    0.22    0.91
   9  -2   4   -0.20    0.80
  -9   2  -4   -0.13    0.21
  -9  -2  -4    0.22    0.22
  -2   5  -7   19.40    2.12
  -2   5  -7   18.90    0.76
   2  -5   7   16.41    1.60
  -2  -5  -7   17.76    0.75
  -2  -5  -7   20.12    0.90
  -2   5  -7   18.90    0.74
  -5 -10   1    3.93    0.54
  -5  10   1    3.56    0.29
   5 -10  -1    2.53    1.33
   5 -10  -1    3.76    0.61
   8  -7   2   11.27    2.11
   8  -7   2   11.90    1.18
  -8  -7  -2   12.21    0.49
  -8  -7  -2   10.37    0.49
  -8   7  -2   12.68    0.49
  -6   6  -5    3.53    0.36
  -6   6  -5    2.80    0.33
  -6  -6  -5    3.09    0.38
   6  -6   5    4.97    0.95
   4   8  -5    3.45    0.64
   4  -8  -5    3.74    0.44
   4   8  -5    3.66    0.39
  -4   8   5    3.57    0.27
   4  -8  -5    4.33    0.77
  -4  -8   5    2.98    0.78
  -4   8   5    3.90    0.36
   7  -3  -6    1.12    0.33
  -7   3   6    1.01    0.30
   7   3  -6    0.60    0.99
   7  -3  -6    0.31    0.80
   7  -3  -6    0.96    0.57
   3 -10   3   72.11    2.50
  -3  10  -3   67.06    2.37
  -3 -10  -3   74.69    2.11
  -3  10  -3   77.40    2.11
  -3 -10  -3   77.85    2.15
  -3  10  -3   75.80    1.99
  -5   0  -7    0.16    0.21
   5   0   7    0.22    0.17
  -5   0  -7   -0.23    0.27
  -5   0  -7   -0.01    0.27
   0  11   2   73.47    1.98
   0  11   2   81.56    2.13
   0  11  -2   83.56    2.21
   0 -11   2   79.77    2.48
   0 -11  -2   82.80    2.34
   0 -11  -2   75.75    2.40
   0  11  -2   77.18    2.25
  -5  -7  -5    6.76    0.42
  -5  -7  -5    6.52    0.43
  -5   7  -5    6.45    1.58
   5  -7   5    7.08    0.96
  -5   7  -5    6.29    0.41
   5  -7   5    6.71    1.20
  -5   7  -5    6.25    0.40
   5   3  -7    4.91    0.63
   5  -3  -7    6.62    0.97
   5   3  -7    4.99    0.54
   5  -3  -7    4.29    0.37
   5   3  -7    4.37    0.70
  -5   3   7    5.61    0.43
   5  -3  -7    4.19    0.72
  -1   0  -8   37.83    1.31
   1   0   8   39.50    1.14
  -1   0  -8   42.74    1.33
   2   0  -8    4.60    0.57
   2   0  -8    4.58    0.91
  -2   0   8    4.56    0.31
   2   0  -8    3.85    0.45
   3   5  -7  168.48    4.42
  -3  -5   7  177.32    5.52
   3  -5  -7  182.27    4.37
   3   5  -7  192.67    4.91
   3   5  -7  180.95    5.33
   3   5  -7  186.43    4.69
  -3   5   7  185.20    4.45
  -3   5   7  186.38    4.48
  -3   5   7  188.06    4.54
  -6  -9  -2   15.82    0.73
   6  -9   2   14.93    2.51
  -6   9  -2   14.40    0.59
  -6   9  -2   14.16    0.62
  -6  -9  -2   14.43    0.64
   6  -9   2   13.09    1.08
   1  11  -2   -0.14    0.25
  -1  11   2   -0.01    0.16
   1  11  -2    0.11    0.31
   1 -11  -2    0.11    0.34
  -1 -11   2   -0.34    0.60
   1 -11  -2   -0.77    0.54
  -1  11   2    0.26    0.22
   5 -10   1  186.33    4.95
  -5 -10  -1  198.51    4.86
   5 -10   1  165.56    6.94
  -5  10  -1  188.89    4.52
  -5  10  -1  199.37    4.70
  -9  -6   2   67.25    1.91
   9  -6  -2   62.96    2.23
   9  -6  -2   65.84    3.84
  -9   6   2   71.75    1.87
  -5   1  -7  296.63    6.89
   5   1   7  296.28    6.82
   5  -1   7  297.88    6.84
  -5   1  -7  286.88    6.65
  -5   1  -7  299.11    7.01
  -5  -1  -7  296.36    6.95
  -7   0  -6   24.25    0.82
  -7   0  -6   23.55    0.86
   7   0   6   23.11    0.77
 -10  -4   2   13.20    0.60
  10   4  -2   12.12    1.41
  10  -4  -2   11.91    1.11
   1  11   2   14.20    0.60
  -1  11  -2   13.21    0.60
  -1 -11  -2   13.79    0.77
  -1 -11  -2   12.74    0.79
   1 -11   2   13.00    1.10
  -1  11  -2   13.83    0.61
  -1  -1  -8   52.90    1.57
   1   1   8   51.27    1.40
  -1  -1  -8   51.57    1.62
  -1   1  -8   49.62    1.57
  -1   1  -8   52.62    1.54
   1  -1   8   52.81    1.44
   8  -4  -5   19.77    1.56
   8  -4  -5   19.54    0.96
  -8   4   5   19.81    0.74
   8   4  -5   16.04    2.19
   8  -5   4    9.01    1.28
   8  -5   4    9.62    1.34
  -8  -5  -4    9.97    0.48
  -8   5  -4   10.18    0.44
  -8  -5  -4    9.70    0.47
 -10   0  -3    0.08    0.20
   2  -1  -8   15.27    0.78
  -2   1   8   14.91    0.59
   2   1  -8   15.79    0.90
   2   1  -8   14.01    0.72
   2  -1  -8   16.12    0.92
   2   1  -8   13.71    1.13
  -7   7   4    8.27    0.38
   7  -7  -4    7.93    0.64
   7  -7  -4    8.89    1.31
  -7   7   4    8.19    0.68
   0  -9  -5  183.28    4.57
   0   9  -5  171.17    4.15
   0  -9   5  184.71    5.23
   0   9  -5  185.13    4.59
   0  -9  -5  175.75    4.28
   3 -11   0  105.13    4.37
  -3  11   0  114.54    2.84
  -3  11   0  114.44    2.94
  -3 -11   0  111.15    3.00
  -3  11   0  112.29    2.87
   5  -6  -6  213.38    5.13
  -5   6   6  208.76    4.92
   5   6  -6  204.09    5.35
  -5   6   6  200.90    4.90
   5   6  -6  206.75    5.03
  -7  -1  -6    0.75    0.30
   7   1   6    0.69    0.20
  -7   1  -6    0.75    0.22
  -7  -1  -6    1.11    0.31
  -7   1  -6    0.91    0.29
   1   9  -5   14.62    0.78
   1  -9  -5   16.80    0.79
  -1  -9   5   14.65    1.17
   1  -9  -5   15.30    0.88
  -6   4  -6    9.69    0.52
  -6  -4  -6    9.94    0.50
  -6   4  -6    9.39    0.42
  -6  -4  -6    9.16    0.47
   6  -4   6    9.49    1.28
   0   2  -8    0.54    0.39
   0  -2  -8    0.62    0.37
   0   2  -8    0.65    0.30
   0   2   8    0.71    0.19
   0  -2  -8    0.40    0.38
  -6   5   6   19.54    0.74
   6  -5  -6   17.26    1.17
   6  -5  -6   19.23    0.83
   6   5  -6   16.79    1.70
   1  -2  -8   12.16    0.63
   1   2  -8   10.77    0.69
   1  -2  -8   12.83    0.75
  -1   2   8   12.06    0.43
   1   2  -8   10.43    0.54
   6   0  -7    0.40    0.62
   6   0  -7    0.03    0.18
 -10   1  -3   52.80    1.44
 -10  -1  -3   49.68    1.37
  10  -1   3   50.30    2.35
   9   4  -4   51.08    3.48
   9  -4  -4   48.48    2.84
   9  -4  -4   48.84    1.84
  -9  -4   4   45.68    1.41
  -9   4   4   48.54    1.38
 -11   0   0    2.49    0.29
  11   0   0   -0.19    1.47
   0 -10   4    5.75    0.87
   0  10  -4    5.57    0.42
   0 -10  -4    5.46    0.64
   0  10  -4    5.07    0.44
 -10  -3   3    3.55    0.41
  10  -3  -3    4.77    0.85
 -10   3   3    3.11    0.31
  10  -3  -3    5.27    2.28
  10   3  -3    2.37    1.50
   6   8  -4  417.43    9.55
  -6   8   4  435.47   10.32
   6  -8  -4  435.93   10.90
  -6   8   4  429.38    9.75
   6  -8  -4  419.45    9.93
  -4   9  -4    8.64    0.94
  -4  -9  -4    8.68    0.51
   4  -9   4    7.15    1.15
   4  -9   4    8.51    1.07
  -4  -9  -4    8.69    0.52
  -4   9  -4   10.26    0.52
   9   0  -5   -1.42    1.17
  -9   0   5    0.02    0.31
 -11   0   1    0.25    0.25
  11   0  -1    0.36    1.85
   7  -5   5    0.74    1.06
  -7  -5  -5    0.19    0.22
   7  -5   5   -0.69    0.58
  -7  -5  -5    0.06    0.28
  -7   5  -5   -0.44    0.23
   6  -1  -7    9.46    0.80
   6  -1  -7    8.73    0.41
   6   1  -7    8.96    0.83
  -6   1   7    8.76    0.49
  -1 -10   4   23.59    1.30
   1  10  -4   23.84    1.02
  -1  10   4   22.48    0.77
   1 -10  -4   23.57    1.11
   1  10  -4   24.57    0.92
   1 -10  -4   22.45    0.93
  -1   9  -5  317.41    7.48
  -1  -9  -5  323.81    7.64
   1  -9   5  309.59    8.07
  -1   9  -5  312.06    7.28
  -3  11   1   99.68    2.50
  -3 -11   1   99.94    2.82
   3 -11  -1   96.02    3.71
  -3  11   1   92.59    2.64
  -3   7  -6   41.87    1.25
  -3  -7  -6   41.99    1.26
   3  -7   6   41.68    2.30
  -3   7  -6   43.48    1.37
  -3  -7  -6   40.39    1.27
  -3   7  -6   41.78    3.15
  -7   8   3   50.77    1.39
   7  -8  -3   51.16    1.76
   7  -8  -3   53.85    2.67
  11   1   0    2.52    1.34
 -11  -1   0    2.75    0.30
  11  -1   0    2.03    1.34
 -11   1   0    2.06    0.29
  -2 -11   2    0.37    0.57
  -2  11   2    0.04    0.18
   2 -11  -2    0.98    0.68
   2  11  -2   -0.06    0.35
   5   2   7   50.61    1.41
  -5   2  -7   58.84    1.61
  -5   2  -7   57.97    1.59
  -5   2  -7   60.37    1.73
  -5  -2  -7   62.82    1.78
  -3 -11  -1   34.38    1.26
  -3  11  -1   34.29    1.12
   3 -11   1   34.64    1.45
  -3  11  -1   35.37    1.19
  -3  11  -1   35.45    1.08
   3 -11   1   29.93    2.95
   9   1  -5   90.90    4.31
  -9   1   5  101.95    2.65
   9  -1  -5   99.13    4.17
 -11   1   1    0.07    0.25
 -11  -1   1    0.69    0.27
  11  -1  -1   -0.93    1.72
  11   1  -1   -0.25    1.09
   8   3   5    0.49    0.21
  -8   3  -5    0.11    0.24
  -8  -3  -5    0.45    0.21
  -8   3  -5    0.51    0.27
  -8  -3  -5    0.27    0.25
   8  -3   5    0.13    0.90
  -1   2  -8    0.37    0.38
  -1  -2  -8    0.76    0.38
  -1   2  -8    0.51    0.24
  -1  -2  -8    0.70    0.34
   1   2   8    0.64    0.16
  -1  10  -4    0.29    0.29
  -1  10  -4    0.17    0.27
  -1 -10  -4    0.53    0.48
   1 -10   4   -0.07    0.71
  -1 -10  -4   -0.23    0.44
   0   6  -7    0.26    0.38
   0  -6  -7    0.38    0.29
   0   6  -7   -0.08    0.30
   0   6  -7   -0.23    0.23
   0  -6  -7   -0.13    0.39
   0   6  -7   -0.87    1.28
   0  -6   7   -1.43    0.86
   0   6   7   -0.22    0.18
   9   3   4   10.12    0.46
  -9   3  -4   11.79    0.44
   9  -3   4   13.00    1.28
   9  -3   4   10.64    1.31
  -9   3  -4   11.63    0.56
  -8   6   4   21.23    0.73
   8  -6  -4   21.14    1.02
   8   6  -4   21.69    1.40
   8  -6  -4   21.61    1.70
  -8   7   3   99.36    2.48
   8  -7  -3   95.05    3.92
   8  -7  -3   92.23    2.73
  -2   0  -8  693.16    3.68
   2   0   8  692.62    3.14
  -2   0  -8  652.63   14.89
  -4  -8  -5    2.00    0.37
  -4   8  -5    2.02    0.29
  -4   8  -5    1.02    0.33
  -4   8  -5    2.33    1.09
  -4  -8  -5    1.60    0.35
   4  -8   5    1.96    1.08
  -2   2   8   82.81    2.12
   2  -2  -8   89.71    2.47
   2   2  -8   89.31    2.61
   2  -2  -8   87.42    2.65
   2   2  -8   80.60    2.69
   2   2  -8   84.69    2.32
  -1   6   7    4.09    0.27
   1  -6  -7    4.85    0.39
   1   6  -7    4.74    0.51
  -1   6   7    4.90    0.34
  -1  -6   7    7.46    1.24
   1  -6  -7    4.98    0.56
   1   6  -7    4.68    0.38
  -8  -8   0  128.47    3.27
   8  -8   0  137.12    3.97
  -8   8   0  135.50    3.28
   8  -8   0  117.64    5.81
  -8  -8   0  131.87    3.34
  -2 -11  -2   44.96    1.69
   2 -11   2   48.56    1.96
   2  11   2   48.81    1.56
  -2 -11  -2   48.55    1.73
  -2  11  -2   46.01    1.51
  -2  11  -2   48.92    1.67
  -2  11  -2   46.53    1.60
  10  -5   0    4.14    0.91
  10  -5   0    2.29    2.32
 -10   5   0    4.25    0.33
 -10  -5   0    3.76    0.35
   2   9  -5  130.76    4.05
  -2  -9   5  130.99    3.97
  -2   9   5  123.74    3.11
   2  -9  -5  127.52    3.24
   2  -9  -5  126.76    3.93
  -4 -10   3   15.12    0.93
   4 -10  -3   13.95    0.73
   4 -10  -3   13.95    1.14
  -4  10   3   13.85    0.46
  -5  10   2   33.87    1.14
   5 -10  -2   34.59    1.43
   5 -10  -2   33.88    2.18
  -5 -10   2   33.98    1.41
   3   0  -8    2.19    0.56
   3   0  -8    2.75    0.80
   3   0  -8    2.93    0.47
   7   2   6    0.60    0.19
  -7  -2  -6    0.62    0.29
  -7   2  -6    0.71    0.23
  -7   2  -6    0.77    0.32
  -7  -2  -6    0.58    0.27
  -6   7   5    6.25    0.35
   6  -7  -5    6.04    0.53
   6  -7  -5    5.90    0.77
  -6   7   5    5.81    0.50
  -4  -4  -7    1.43    0.30
  -4  -4  -7    1.43    0.34
  -4   4  -7    1.45    0.28
  -4   4  -7    1.10    0.27
   4  -4   7    1.13    1.05
  -4   4  -7    1.87    0.36
  -7   9   0   57.82    1.79
   7  -9   0   53.79    4.00
  -7  -9   0   56.98    1.92
   7  -9   0   53.87    2.09
   9  -6   2  194.73    7.56
  -9  -6  -2  183.98    5.20
   9  -6   2  197.96    6.59
  -9   6  -2  200.14    5.60
  -9  -6  -2  195.05    5.49
   9  -5   3    2.89    1.11
  -9   5  -3    2.06    0.29
   9  -5   3    1.48    1.34
  10  -2   3   -0.76    1.03
  10  -2   3    0.08    0.77
 -10  -2  -3    0.25    0.19
 -10   2  -3    0.20    0.21
 -10  -5   1    9.63    0.51
  10  -5  -1    8.76    2.69
  10   5  -1    9.03    1.00
  10  -5  -1    7.29    0.98
  -2  -1  -8    0.54    0.33
  -2   1  -8    0.31    0.25
  -2   1  -8    0.53    0.28
   2  -1   8    0.38    0.20
   2   1   8    0.55    0.16
  -2  -1  -8    0.47    0.35
  -2   1  -8    0.37    0.35
  -8  -8   1    2.68    0.33
   8  -8  -1    2.84    0.70
   8  -8  -1    6.35    2.41
  -8   8   1    2.53    0.28
   7  -6  -5    1.56    0.38
  -7   6   5    2.21    0.26
  -3   5  -7  128.34    3.72
  -3  -5  -7  123.97    3.72
  -3   5  -7  127.58    3.73
   3  -5   7  124.86    4.74
  -3   5  -7  127.87    5.75
  -3  -5  -7  136.90    4.01
   4  -7  -6   44.80    1.55
  -4   7   6   46.18    1.47
  -4   7   6   46.00    1.57
   4  -7  -6   45.00    1.84
   4   7  -6   44.88    1.82
   4   7  -6   46.78    1.64
 -11   0  -1   -0.03    0.23
  11   0   1    1.96    1.24
   3  -1  -8    7.15    1.07
   3   1  -8    5.10    0.63
   3  -1  -8    5.23    0.53
   3   1  -8    4.61    0.52
   3  -1  -8    5.05    0.57
   3   1  -8    5.11    0.82
   2 -10  -4    4.68    0.68
  -2 -10   4    5.24    0.80
  -2  10   4    4.83    0.29
   2  10  -4    3.87    0.54
   2 -10  -4    5.79    0.54
  10  -4   2    1.87    0.99
 -10  -4  -2    1.07    0.25
 -10   4  -2    0.98    0.25
  10  -4   2   -0.55    1.37
  -8   0   6    2.66    0.39
   8   0  -6    1.87    0.96
   1   6   7   24.08    0.92
  -1  -6  -7   21.84    0.96
  -1   6  -7   20.80    0.94
  -1  -6  -7   21.34    0.83
  -1   6  -7   22.02    0.88
  -1   6  -7   23.69    0.96
   1  -6   7   19.82    1.69
  -1   6  -7   20.74    2.36
   6  -2  -7  215.59    6.11
   6  -2  -7  236.40    7.03
   6   2  -7  236.35    7.16
  -6   2   7  230.21    6.51
   7  -9  -1   56.28    3.52
  -7   9   1   64.31    1.96
  -7  -9   1   56.09    1.93
   7  -9  -1   64.02    2.38
   0  -8  -6    3.62    0.42
   0  -8   6    5.91    1.13
   0   8  -6    3.26    0.30
   0   8  -6    3.79    0.46
   0  -8  -6    4.13    0.52
   0   8  -6    5.29    0.44
 -10   0   4   40.58    1.41
  10   0  -4   36.40    3.20
  11   2   0    0.17    0.93
 -11  -2   0   -0.07    0.24
 -11   2   0   -0.21    0.24
  11  -2   0    0.43    2.00
  -7   4   6  387.25    2.67
   7  -4  -6  365.14    4.38
   7  -4  -6  346.17    9.67
   7   4  -6  360.14   11.78
   6   9  -3   14.31    0.49
   6  -9  -3   15.84    1.50
  -6   9   3   13.99    0.81
   6  -9  -3   14.86    0.80
  -6   9   3   14.65    0.49
   1   8  -6    7.10    0.55
   1   8  -6    6.88    0.45
   1  -8  -6    7.12    0.66
   1  -8  -6    7.22    0.51
  -1  -8   6    7.24    0.95
 -11  -1  -1    1.56    0.23
 -11   1  -1    2.00    0.29
  11  -1   1    2.48    1.42
  11   1   1    2.89    1.11
  -2   6   7   22.95    0.90
   2   6  -7   22.45    1.09
  -2  -6   7   21.93    1.72
   2   6  -7   22.69    0.97
   2  -6  -7   22.33    0.88
  -2   6   7   22.36    0.83
   2  -6  -7   24.03    1.13
   0  -3  -8  141.21    4.14
   0   3  -8  139.05    4.06
   0  -3  -8  144.82    4.41
   0   3  -8  144.41    4.32
   0   3  -8  155.79    5.22
  -8  -1   6    0.54    0.32
   8  -1  -6   -0.71    0.88
   8   1  -6    0.19    0.95
  -8   1   6    0.54    0.31
  -9  -2   5  202.95    5.79
   9   2  -5  188.63    7.60
   9  -2  -5  205.65    7.24
  -9   2   5  211.61    5.99
   5   4  -7   -0.16    0.44
   5  -4  -7   -0.21    0.29
   5  -4  -7   -0.02    0.63
  -5   4   7    0.01    0.27
  11   2  -1   53.81    3.09
 -11   2   1   56.33    1.76
 -11  -2   1   55.97    1.78
  11  -2  -1   56.57    4.13
  -2  -9  -5  143.69    4.24
  -2   9  -5  131.82    3.83
   2  -9   5  141.03    4.85
  -2   9  -5  140.44    4.13
  -2  -9  -5  143.29    4.15
  -1   3   8   10.59    0.42
   1   3  -8   15.11    0.63
   1   3  -8   14.25    0.77
   1  -3  -8   12.91    0.77
   1  -3  -8   13.49    0.66
   4   5  -7   45.71    1.82
   4  -5  -7   47.08    1.81
   4   5  -7   43.88    1.66
   4  -5  -7   46.01    1.52
  -4   5   7   46.29    1.53
   4   5  -7   45.27    1.84
   5 -10   2   37.49    3.24
  -5  10  -2   36.56    1.31
  -5  10  -2   39.97    1.33
  -5 -10  -2   40.65    1.47
   8  -8   1   44.42    2.03
   8  -8   1   40.74    3.54
  -8   8  -1   42.52    1.39
  -8  -8  -1   41.30    1.44
 -10  -1   4   22.87    0.94
  10   1  -4   22.08    2.84
  10  -1  -4   17.77    2.55
  -4 -10  -3   37.31    1.36
  -4  10  -3   37.22    1.57
  -4  10  -3   35.26    1.26
  -4 -10  -3   37.37    1.36
  -4  10  -3   35.53    1.22
   4 -10   3   35.85    1.76
  11   0  -2   40.68    3.32
 -11   0   2   38.65    1.31
  10  -5   1   21.95    1.66
  10  -5   1   27.15    2.98
 -10   5  -1   23.56    0.86
 -10  -5  -1   23.59    0.90
   9  -7   0   54.36    4.34
  -9   7   0   57.23    1.77
   9  -7   0   57.75    2.44
  -9  -7   0   59.99    1.95
  -2  10  -4   40.42    1.44
  -2 -10  -4   38.24    1.38
  -2  10  -4   37.92    1.30
   2 -10   4   37.63    1.84
  -2 -10  -4   38.23    1.45
  -7  -9  -1   77.02    2.43
  -7   9  -1   81.36    2.63
   7  -9   1   73.89    2.76
  -7   9  -1   78.23    2.33
   7  -9   1   68.55    4.57
  -1   8  -6   56.02    1.79
   1  -8   6   54.09    2.62
  -1  -8  -6   54.03    1.84
  -1  -8  -6   48.10    1.58
  -1   8  -6   59.96    1.93
  -1   8  -6   54.97    1.87
   5   9  -4    0.77    0.26
   5  -9  -4    0.87    0.40
   5  -9  -4    0.38    0.77
  -5   9   4    1.18    0.20
  -2  -2  -8   35.57    1.35
  -2   2  -8   33.42    1.22
  -2  -2  -8   34.15    1.22
  -2   2  -8   34.64    1.23
  -2   2  -8   33.21    1.25
  -7  -7  -4    9.82    0.47
  -7  -7  -4    9.72    0.46
   7  -7   4   10.49    1.18
  -7   7  -4   10.85    0.46
   7  -7   4   10.51    1.30
  -7   7  -4   10.02    0.45
  -5   8   5   -0.03    0.25
   5   8  -5   -0.05    0.53
   5   8  -5    0.18    0.27
   5  -8  -5   -0.27    0.38
  -5   8   5    0.39    0.18
   5  -8  -5   -0.13    0.75
   7  -8   3    2.88    1.54
  -7  -8  -3    1.48    0.31
  -7   8  -3    1.41    0.29
   7  -8   3    0.37    0.87
  -7  -8  -3    1.08    0.34
  -7   8  -3    1.33    0.31
  11   1  -2   -0.54    1.68
 -11  -1   2   -0.02    0.27
  11  -1  -2    2.04    2.21
 -11   1   2    0.06    0.24
  -5   3  -7   28.58    1.04
   5  -3   7   30.56    2.00
  -5  -3  -7   28.30    1.08
  -5   3  -7   29.89    1.14
  -5   3  -7   28.52    1.03
  -5  -3  -7   29.29    1.07
  -6   8  -4    8.15    0.39
  -6  -8  -4    9.27    0.48
  -6  -8  -4    7.63    0.44
  -6   8  -4    8.13    0.45
   6  -8   4    7.90    1.13
   3 -11  -2   28.95    1.25
   3 -11  -2   26.77    1.62
  -3  11   2   28.03    0.99
  -3 -11   2   30.61    1.42
  -9   7   1   40.08    1.32
   9  -7  -1   39.76    3.59
  -9  -7   1   41.22    1.46
   9  -7  -1   40.12    1.85
   3   2  -8    0.71    0.51
   3   2  -8    0.25    0.38
  -3   2   8    0.36    0.21
   3  -2  -8    0.28    0.48
   3   2  -8    0.79    0.41
   3  -2  -8    0.23    0.53
   3  -2  -8   -0.20    0.73
  -1  -3  -8   43.91    1.61
  -1   3  -8   44.20    1.60
  -1   3  -8   46.11    1.55
  -1  -3  -8   45.89    1.59
  -1   3  -8   43.12    1.48
  -4  11   0   20.36    0.82
  -4 -11   0   21.68    1.02
   4 -11   0   21.85    1.17
   4 -11   0   21.66    2.50
  -4  11   0   21.72    0.83
   2  -8  -6    0.82    0.43
   2   8  -6    1.36    0.37
  -2  -8   6    1.68    1.02
   2  -8  -6    0.96    0.58
  -5   6  -6  158.78    4.52
   5  -6   6  155.34    5.66
  -5   6  -6  155.51    4.49
  -5  -6  -6  158.03    4.55
   2  -3  -8   18.71    1.07
  -2   3   8   18.67    0.73
   2  -3  -8   19.08    0.92
   2   3  -8   19.26    0.89
   2   3  -8   19.09    0.96
  -3  -9   5   26.61    1.56
  -3   9   5   25.31    0.89
   3  -9  -5   26.54    1.33
   3   9  -5   24.76    1.22
   3  -9  -5   24.30    1.05
   9  -6  -3   10.11    1.59
   9   6  -3   15.95    1.14
  -9   6   3   14.49    0.50
  -9  -6   3   12.41    0.56
   9  -6  -3   12.85    0.87
   0 -11  -3   50.85    1.93
   0  11   3   42.71    1.53
   0  11  -3   54.01    1.77
   0 -11   3   50.04    2.04
   0  11  -3   48.15    1.72
   0 -11  -3   54.83    1.89
 -10   4   3   34.49    1.18
  10  -4  -3   35.13    1.83
 -10  -4   3   39.80    1.43
  10  -4  -3   36.49    3.25
  10   4  -3   34.58    2.49
  11   2   1    6.96    1.14
 -11   2  -1    5.30    0.32
 -11  -2  -1    5.36    0.37
  -7   3  -6   25.46    0.94
  -7  -3  -6   23.39    0.92
  -7   3  -6   25.70    1.00
  -7  -3  -6   23.82    0.92
   6 -10   0    1.43    1.45
   6 -10   0    3.89    0.72
  -6 -10   0    4.72    0.51
  -6  10   0    3.75    0.31
  -6  10   0    4.41    0.37
  -8   2   6   53.94    1.77
  -8  -2   6   38.99    1.36
   8  -2  -6   49.95    2.44
   8   2  -6   53.23    2.86
  10  -5  -2   26.13    1.55
  10   5  -2   28.67    1.70
 -10  -5   2   29.40    1.15
 -10   5   2   29.56    1.04
   8  -5  -5   59.69    2.10
   8  -5  -5   61.68    2.87
  -8   5   5   60.63    1.89
   8   5  -5   58.72    3.60
 -10  -3  -3  212.69    5.95
  10  -3   3  210.67    7.05
  10  -3   3  200.66    7.78
 -10   3  -3  210.13    5.87
  -3  11  -2   86.95    2.73
  -3  11  -2   80.88    2.51
  -3 -11  -2   91.78    2.85
  -3  11  -2   89.91    2.67
   3 -11   2   91.41    3.16
  -2   6  -7  126.35    3.70
  -2  -6  -7  123.99    3.68
  -2   6  -7  118.54    3.49
  -2   6  -7  115.58    5.59
   2  -6   7  117.06    4.52
  -2  -6  -7  117.06    3.41
  -2   6  -7  124.07    3.71
   8  -7   3    4.27    1.13
  -8   7  -3    3.43    0.33
   8  -7   3    4.29    1.60
  -8  -7  -3    3.45    0.31
  -8   7  -3    3.32    0.36
  -8  -7  -3    3.75    0.37
   8  -8  -2   14.57    2.15
  -8   8   2   14.69    0.48
   8  -8  -2   15.37    0.93
  -1 -11   3   20.41    1.23
  -1  11   3   19.48    0.78
   1 -11  -3   22.81    1.21
   1  11  -3   17.46    0.76
   1  11  -3   20.86    1.02
  10  -2  -4    1.83    1.89
  10   2  -4   -1.51    1.68
 -10  -2   4    0.26    0.35
 -10   2   4   -0.03    0.28
  -4  11   1    8.29    0.40
  -4  11   1    9.30    0.42
   4 -11  -1    9.26    0.78
  -4 -11   1    8.94    0.60
   4 -11  -1    8.27    1.49
  -3   0  -8   -0.15    0.37
  -3   0  -8   -0.37    0.31
   3   0   8   -0.01    0.18
  -3  10   4   20.81    0.78
  -3 -10   4   19.74    1.19
   3  10  -4   19.35    1.07
   3 -10  -4   19.00    0.89
   3 -10  -4   19.30    1.19
  -6  -5  -6   21.57    0.87
  -6   5  -6   21.00    0.82
   6  -5   6   22.90    1.85
   9  -7   1    2.83    0.92
   9  -7   1    2.41    1.86
  -8   4  -5    9.71    0.43
  -8  -4  -5   10.10    0.45
  -8  -4  -5    9.74    0.48
   8  -4   5    8.50    1.29
  -8   4  -5    9.31    0.48
   6  -9   3    4.60    0.82
  -6  -9  -3    4.58    0.44
   6  -9   3    4.82    1.53
  -6  -9  -3    5.74    0.41
  -6   9  -3    5.16    0.37
  -1  11  -3   32.20    1.14
  -1 -11  -3   30.32    1.22
   1 -11   3   32.11    1.57
  -1 -11  -3   31.82    1.32
  -1  11  -3   31.12    1.22
   6  -3  -7   -0.00    0.28
   6  -3  -7   -0.11    0.64
   6   3  -7   -0.09    0.60
  -6   3   7    0.23    0.28
  -9   4  -4    3.99    0.41
   9  -4   4    3.45    1.06
   9  -4   4    3.90    1.05
  -9  -4  -4    4.12    0.40
  -9   4  -4    3.40    0.31
   6 -10  -1    5.84    1.82
   6 -10  -1    4.87    0.60
  -6 -10   1    5.52    0.56
  -6  10   1    5.37    0.34
  -9   5   4    0.52    0.27
  -9  -5   4    0.26    0.24
   9   5  -4    0.30    1.00
   9  -5  -4   -1.51    1.36
   9  -5  -4    0.23    0.41
   7  -9  -2    7.46    1.60
  -7   9   2    7.48    0.37
   7  -9  -2    7.18    0.67
  -3   6   7   65.23    2.00
   3  -6  -7   61.27    2.15
   3   6  -7   64.16    2.28
   3   6  -7   65.71    2.24
   3  -6  -7   63.81    2.01
  -3   6   7   68.41    2.14
  -3  -6   7   64.19    2.96
  11   3   0    3.25    0.91
 -11  -3   0    4.04    0.35
 -11   3   0    3.46    0.31
  11  -3   0    3.65    0.84
   4   0  -8   84.46    2.94
   4   0  -8   78.58    2.59
   4   0  -8   83.83    3.23
 -11  -2   2   75.48    2.34
 -11   2   2   72.64    2.21
  11  -2  -2   74.62    4.72
  11   2  -2   78.14    4.03
  -4  11  -1   16.75    0.69
  -4  11  -1   18.61    0.80
  -4  11  -1   17.53    0.71
  -4 -11  -1   16.54    0.76
   4 -11   1   16.08    2.64
  -4  -7  -6    0.77    0.31
  -4   7  -6    2.05    1.35
   4  -7   6    0.78    1.08
  -4   7  -6    0.12    0.24
  -4   7  -6   -0.23    0.31
  -4  -7  -6    0.08    0.30
  -3   1  -8   21.99    0.95
  -3   1  -8   20.32    0.85
   3   1   8   15.16    0.52
  -3  -1  -8   20.53    0.91
  -3  -1  -8   19.28    0.82
  -3   1  -8   19.82    0.82
   9   3  -5   41.89    3.37
  -9  -3   5   37.93    1.35
  -9   3   5   38.53    1.32
   9  -3  -5   38.50    2.39
 -11   3   1   10.40    0.44
  11  -3  -1   10.04    1.08
  11   3  -1    6.21    1.20
  11  -3  -1   14.58    2.95
 -11  -3   1   10.01    0.48
  -2   8  -6    2.66    0.37
  -2  -8  -6    1.60    0.43
  -2   8  -6    3.07    0.30
   2  -8   6    1.57    1.14
  -2   8  -6    2.71    0.37
  -8   6  -4    0.65    0.23
   8  -6   4   -0.53    0.78
   8  -6   4    1.18    1.16
  -8  -6  -4    0.30    0.28
  -8  -6  -4    0.24    0.26
  -8   6  -4    0.33    0.25
  -6   7  -5   44.84    1.52
  -6  -7  -5   43.93    1.48
   6  -7   5   52.39    2.46
  -6   7  -5   44.62    1.45
  -6  -7  -5   43.40    1.44
   4   1  -8   -0.30    0.53
   4   1  -8    0.14    0.50
   4  -1  -8    0.25    0.52
   4  -1  -8   -0.20    0.75
   4   1  -8   -0.28    0.47
   4  -1  -8   -0.11    0.56
   6   0   7    0.34    0.19
  -6   0  -7    0.19    0.27
  -6   0  -7   -0.44    0.26
   6 -10   1   37.05    3.34
   6 -10   1   36.73    1.69
  -6  10  -1   33.54    1.19
  -6  10  -1   37.66    1.26
  -6 -10  -1   36.79    1.38
  -6   6   6   17.80    0.72
   6  -6  -6   16.73    0.68
 -11   0  -2    3.38    0.30
  11   0   2    4.39    1.10
  -3   9  -5   22.91    0.90
   3  -9   5   23.04    1.61
  -3  -9  -5   23.55    0.99
  -3  -9  -5   22.87    0.90
  -3   9  -5   24.95    1.02
  -5  -9  -4   42.75    1.47
  -5  -9  -4   42.95    1.46
  -5   9  -4   45.02    1.53
   5  -9   4   42.68    2.12
   5  -9   4   41.25    2.30
  -5   9  -4   41.93    2.06
  -2 -11   3    6.49    0.78
  -2  11   3    7.77    0.36
   2 -11  -3    8.32    0.84
   2  11  -3    7.58    0.63
   2 -11  -3    8.39    0.63
  -2   3  -8   31.99    1.16
  -2   3  -8   30.25    1.12
  -2   3  -8   33.28    1.29
  -2  -3  -8   30.55    1.21
  -2  -3  -8   29.89    1.14
  -6  -1  -7    0.15    0.30
  -6   1  -7    0.29    0.32
  -6   1  -7    0.29    0.23
  -6   1  -7   -0.52    0.26
  -9  -7   2    0.99    0.34
   9  -7  -2    1.23    0.57
  -9   7   2    1.29    0.25
   9  -7  -2    0.24    2.06
   3  -3  -8    0.21    0.54
  -3   3   8    0.40    0.23
   3   3  -8    0.37    0.50
   3   3  -8   -0.35    0.46
   3  -3  -8    0.41    0.27
   3  -3  -8    0.36    0.51
   3   3  -8    0.56    0.42
  -3   3   8    0.39    0.22
  -3  10  -4   33.75    1.18
   3 -10   4   33.17    1.67
  -3  10  -4   35.09    1.28
  -3 -10  -4   32.37    1.26
  -3 -10  -4   32.98    1.23
   3  -8  -6   55.65    1.84
   3  -8  -6   54.16    2.02
   3   8  -6   56.59    2.09
  -3  -8   6   50.43    2.44
  -3   8   6   51.24    1.60
   0  -4  -8   20.39    1.04
   0   4  -8   18.94    1.49
   0  -4  -8   18.65    0.86
   0  -4   8   19.96    1.56
   0   4   8   17.55    0.77
   0   4  -8   19.25    0.83
   0   4  -8   18.79    0.93
   5 -10  -3   -0.71    0.83
  -5 -10   3   -0.07    0.56
   5 -10  -3    0.07    0.48
  -5  10   3    0.21    0.21
  -4   5  -7   61.32    1.92
   4  -5   7   58.63    2.87
  -4   5  -7   60.75    1.90
  -4  -5  -7   63.67    2.03
  -4   5  -7   53.94    1.80
   1   4  -8    3.39    0.37
  -1   4   8    2.95    0.31
  -1  -4   8    2.25    0.98
   1  -4  -8    3.40    0.57
   1  -4  -8    2.97    0.39
   1   4  -8    2.66    0.72
   1   4  -8    3.06    0.50
  11  -1   2    6.97    1.26
  11   1   2   10.34    1.19
 -11  -1  -2    8.30    0.41
 -11   1  -2    8.35    0.39
   7  -6   5   37.78    1.98
  -7   6  -5   33.05    1.14
  -7   6  -5   34.08    1.22
   7  -6   5   35.95    2.30
  -7  -6  -5   31.55    1.14
  -9   0  -5   -0.24    0.29
  -9   0  -5   -0.05    0.21
   8  -8   2    1.42    2.02
  -8   8  -2    2.55    0.37
   8  -8   2    1.10    0.93
  -8  -8  -2    1.76    0.30
  -8  -8  -2    1.63    0.37
  -2 -11  -3   28.16    0.93
  -2  11  -3   29.60    0.82
  -2  11  -3   28.83    0.70
   2 -11   3   28.40    1.27
  -2 -11  -3   28.79    0.83
  -3   2  -8    4.87    0.41
  -3   2  -8    4.98    0.46
  -3  -2  -8    4.32    0.43
  -3   2  -8    4.83    0.40
  -3  -2  -8    5.09    0.43
  -5   8  -5    0.21    0.26
   5  -8   5    0.16    0.73
   5  -8   5   -1.17    0.94
  -5  -8  -5    0.22    0.30
  -5   8  -5    0.14    0.33
  -5  -8  -5    0.12    0.30
   0 -12   0   25.95    1.00
   0  12   0   24.43    0.70
  -7   9  -2   84.06    2.65
   7  -9   2   81.17    3.11
   7  -9   2   81.26    4.66
  -7   9  -2   88.64    2.71
  -7  -9  -2   84.94    2.71
 -11  -3  -1    4.78    0.35
  11   3   1    6.26    1.02
 -11   3  -1    4.73    0.35
  11  -3   1    4.52    0.95
  -5   7   6   -0.01    0.24
   5  -7  -6    1.02    0.73
  -5   7   6    0.42    0.20
   5   7  -6    0.23    0.42
   5  -7  -6    0.30    0.36
 -10   5  -2    7.24    0.39
  10  -5   2    6.10    1.75
  10  -5   2    9.17    1.28
   8  -3  -6    8.16    1.13
  -8   3   6    6.31    0.43
   8   3  -6    4.00    1.41
   9   1   5   15.29    0.55
  -9  -1  -5   15.64    0.60
  -9   1  -5   15.79    0.59
  -9  -1  -5   15.05    0.49
  -9   1  -5   15.38    0.50
  -7   0   7    0.17    0.29
   7   0  -7   -1.02    0.67
  10   3  -4   14.90    2.35
 -10  -3   4   14.34    0.62
  10  -3  -4   12.82    1.93
 -10   3   4   12.84    0.50
   4  -2  -8   64.89    2.98
   4   2  -8   59.12    2.12
   4   2  -8   60.75    2.33
  -4   2   8   54.62    1.83
   4  -2  -8   60.26    2.19
   4  -2  -8   54.90    2.20
  -7   5   6   24.58    0.64
   7  -5  -6   23.41    1.30
   7  -5  -6   20.87    0.75
 -10  -6   0   26.62    0.74
  10  -6   0   23.19    3.12
  10  -6   0   22.65    1.48
  -5  -4  -7    9.89    0.51
  -5   4  -7   11.80    0.51
   5  -4   7   11.02    1.40
  -5   4  -7   10.84    0.46
  -5   4  -7   10.45    0.51
  -5  -4  -7   10.70    0.51
   1 -12   0   31.97    1.42
  -1 -12   0   31.19    1.32
  -1  12   0   31.18    1.14
   1  12   0   28.34    0.74
   5  -5  -7   14.37    0.90
   5   5  -7   13.55    0.89
   5  -5  -7   14.28    0.58
  -5   5   7   13.32    0.52
  -1  -4  -8   20.17    0.82
  -1   4  -8   18.35    0.65
  -1   4  -8   19.26    0.63
  -1   4  -8   20.73    0.78
   1  -4   8   21.64    1.58
   4 -11  -2   26.49    1.66
  -4  11   2   29.26    0.66
   4 -11  -2   26.72    1.01
  -4 -11   2   27.87    1.05
  -9  -6  -3    6.36    0.39
   9  -6   3    9.42    1.64
   9  -6   3    7.33    1.23
  -9   6  -3    6.67    0.45
  -9  -6  -3    6.85    0.41
  -9   6  -3    7.49    0.39
  11   0  -3   -0.28    1.90
 -11   0   3    0.14    0.27
 -10   6   1   44.21    1.46
  10  -6  -1   41.86    2.07
 -10  -6   1   42.95    1.54
  10  -6  -1   43.84    3.82
 -10   0  -4   40.52    1.36
  -2   4   8  116.71    3.60
   2  -4  -8  114.96    3.86
   2   4  -8  121.93    3.78
   2   4  -8  121.83    3.93
   2  -4  -8  117.42    3.69
   2  -4  -8  109.95    3.33
  -4   9   5   43.80    1.43
   4   9  -5   42.66    1.81
  -4  -9   5   40.87    1.97
   4  -9  -5   42.42    1.57
   4  -9  -5   46.73    1.97
  -6 -10   2   17.68    0.84
   6 -10  -2   15.30    0.78
  -6  10   2   18.82    0.54
   6 -10  -2   18.22    1.86
   7   1  -7   49.06    2.24
  -7   1   7   51.29    1.75
   7  -1  -7   55.46    2.37
  -7   8   4    0.60    0.41
   7  -8  -4   -0.19    1.02
   7  -8  -4    0.38    0.43
  -7   8   4    0.93    0.21
  -6  -2  -7    4.44    0.38
  -6   2  -7    5.23    0.43
  -6   2  -7    5.04    0.34
  -6   2  -7    4.97    0.40
  -6  -2  -7    5.89    0.43
  -3   6  -7  216.07    6.38
  -3   6  -7  226.68    6.64
  -3   6  -7  233.76    6.80
  -3  -6  -7  233.89    6.85
  -3   6  -7  225.08    9.04
   3  -6   7  223.00    7.68
  11  -3  -2   33.35    3.56
 -11   3   2   32.85    1.16
  11   3  -2   37.85    2.53
 -11  -3   2   36.26    1.31
   0  12  -1   21.69    0.67
   0 -12  -1   20.64    0.88
   0  12   1   17.62    0.59
   0 -12   1   20.82    0.96
  -7   4  -6    0.38    0.33
  -7  -4  -6    0.14    0.24
  -7   4  -6   -0.14    0.25
  -7  -4  -6   -0.03    0.29
 -11  -2  -2  288.98    8.31
  11   2   2  308.74    4.55
 -11   2  -2  276.48    7.96
   0  -7  -7    7.79    0.46
   0   7  -7    8.71    0.50
   0   7  -7    7.87    0.57
   0   7  -7    6.64    0.39
   0  -7  -7    7.88    0.58
   0  -7   7    7.93    1.27
  10  -4   3    2.99    1.25
  10  -4   3    1.94    1.03
 -10   4  -3    2.67    0.29
 -11   1   3   24.09    0.65
 -11  -1   3   23.57    0.70
  11   1  -3   24.44    2.83
  11  -1  -3   22.74    3.00
  -8   7   4   50.12    1.64
   8  -7  -4   47.74    2.73
   8  -7  -4   48.89    1.88
 -10   1  -4   11.54    0.45
 -10  -1  -4   11.74    0.44
   1  -7  -7    0.70    0.43
  -1  -7   7    0.39    1.03
   1   7  -7    0.58    0.41
   1  -7  -7    0.44    0.32
  -1  12   1    0.88    0.22
  -1 -12   1    1.23    0.56
   1 -12  -1    1.23    0.56
  -1  12   1    1.00    0.24
   1  12  -1    1.40    0.29
  -5 -10  -3   25.94    0.79
  -5  10  -3   24.25    0.64
  -5 -10  -3   24.97    0.78
   5 -10   3   25.48    2.20
  -5  10  -3   25.25    0.74
  -8   0  -6  174.48    5.17
  -8   0  -6  181.75    5.32
  -1 -12  -1   22.45    0.83
   1  12   1   20.24    0.64
  -1  12  -1   22.62    0.65
   1 -12   1   21.72    1.06
   4 -10  -4   16.09    0.73
   4 -10  -4   16.11    1.13
  -4  10   4   16.00    0.48
  -4 -10   4   15.59    1.02
   4  10  -4   14.31    0.88
  -9  -7  -2   97.78    3.00
   9  -7   2   89.12    3.61
   9  -7   2   99.88    4.93
  -9  -7  -2   99.22    3.03
  -9   7  -2  101.70    3.07
   4   6  -7   81.35    2.90
  -4   6   7   81.07    2.51
   4  -6  -7   78.42    2.49
  -4  11  -2   20.64    0.65
   4 -11   2   20.50    1.11
  -4  11  -2   20.41    0.58
  -4  11  -2   20.31    0.79
  -4 -11  -2   20.62    0.77
   6   4  -7   -0.57    0.62
   6  -4  -7    0.31    0.31
   6  -4  -7   -0.02    0.65
  -6   4   7    0.08    0.23
  -9   2  -5    2.60    0.30
   9   2   5    2.54    0.28
  -9  -2  -5    2.87    0.36
  -9   2  -5    2.78    0.35
   3 -11  -3    5.91    0.56
   3  11  -3    5.52    0.61
  -3  11   3    5.98    0.33
  -3 -11   3    6.30    0.72
   3 -11  -3    7.09    0.94
  -3   8  -6   10.91    0.55
  -3   8  -6   11.82    0.51
  -3  -8  -6   11.25    0.52
   3  -8   6   10.97    1.39
  -3  -8  -6   11.50    0.59
  11   4   0    0.09    0.70
  11  -4   0    1.28    0.84
 -11   4   0    1.04    0.26
 -11  -4   0    1.03    0.29
  11  -4   0   -0.97    2.19
  -7   7   5    5.01    0.31
   7  -7  -5    4.83    1.07
   7  -7  -5    5.29    0.54
 -10  -5   3   26.88    0.77
  10   5  -3   27.85    1.67
  10  -5  -3   24.75    1.23
 -10   5   3   27.35    0.65
  10  -6   1    0.97    1.01
  10  -6   1    3.36    2.31
 -10   6  -1    2.04    0.28
 -10  -6  -1    2.35    0.30
  -8   1  -6   72.88    2.28
  -8  -1  -6   70.06    2.21
   8   1   6   69.73    2.21
  -8   1  -6   72.79    2.33
  -8  -1  -6   69.89    2.24
  -5  11   0   76.74    2.42
   5 -11   0   77.16    2.76
  -5  11   0   78.78    2.44
  -5 -11   0   76.60    2.57
   5 -11   0   77.86    4.46
   9   4  -5    2.29    1.77
  -9  -4   5    0.91    0.33
  -9   4   5    1.12    0.29
   9  -4  -5    0.86    1.29
  11   4  -1    7.02    1.06
  11  -4  -1    7.07    0.97
 -11  -4   1    8.04    0.47
 -11   4   1    8.33    0.42
  -2 -12   0   26.44    0.94
   2 -12   0   28.58    1.09
  -2  12   0   26.41    0.66
  -1   7  -7  163.84    4.89
  -1  -7  -7  154.81    4.58
   1  -7   7  161.01    5.83
  -1   7  -7  161.28    4.90
  -1  -7  -7  163.23    4.93
  -1   7  -7  158.57    4.72
  -8   8   3   22.48    0.57
   8  -8  -3   23.98    2.07
   8  -8  -3   20.67    0.94
   4   0   8  284.81    8.19
  -4   0  -8  305.40    2.52
  -4   0  -8  315.89    2.31
   6 -10   2   37.84    1.82
  -6 -10  -2   38.41    1.44
  -6  10  -2   36.80    1.30
  -6  10  -2   38.96    1.32
   6 -10   2   40.27    3.41
   7  -2  -7    5.12    0.85
   7   2  -7    3.35    0.92
  -7   2   7    4.48    0.41
  -3   3  -8   47.75    1.69
  -3  -3  -8   48.77    1.73
  -3   3  -8   48.70    1.67
  -3   3  -8   46.58    1.58
   6  -9  -4    0.90    0.43
  -6   9   4    0.94    0.21
   6  -9  -4    0.82    0.93
  -2  -7   7    9.59    1.33
   2  -7  -7    9.12    0.70
   2  -7  -7    8.82    0.51
   2   7  -7    9.98    0.69
   6  -8  -5   46.12    2.14
   6  -8  -5   46.42    1.72
  -6   8   5   45.44    1.49
   8  -5   5    1.27    0.91
  -8  -5  -5    1.68    0.31
   8  -5   5    1.42    1.10
  -8   5  -5    1.29    0.28
  -9  -5  -4   15.43    0.58
   9  -5   4   15.70    1.30
  -9  -5  -4   15.00    0.53
  -9   5  -4   14.15    0.50
   9  -5   4   13.51    1.41
  11   2  -3   16.14    2.26
 -11  -2   3   15.52    0.61
  11  -2  -3   11.65    2.76
   5   0  -8    5.64    0.73
   5   0  -8    6.78    0.69
  -2   4  -8   57.49    1.99
  -2   4  -8   55.93    1.85
  -2   4  -8   57.79    1.93
   2  -4   8   56.92    2.73
  -2  -4  -8   58.81    2.06
   5 -11  -1    5.47    1.69
  -5  11   1    7.34    0.40
  -5  11   1    7.69    0.41
  -5 -11   1    7.27    0.68
   5 -11  -1    8.33    0.66
 -10  -2  -4  108.55    3.26
 -10   2  -4  110.83    3.33
 -10   2  -4  122.99    3.77
  10  -2   4  117.55    4.35
  -4   1  -8    7.70    0.43
  -4   1  -8    8.16    0.46
  -4   1  -8    8.53    0.52
  -4  -1  -8    8.19    0.50
  -4  -1  -8    7.88    0.51
   7  -9  -3   75.87    2.66
   7  -9  -3   74.07    3.54
  -7   9   3   62.56    2.36
  -7   9   3   74.06    2.29
   4  -3  -8    4.23    0.62
   4   3  -8    4.95    0.61
   4   3  -8    4.57    0.57
   4  -3  -8    4.67    0.36
   4  -3  -8    4.85    1.00
  -4   3   8    4.34    0.37
  -4   3   8    4.60    0.33
   0  10  -5    2.56    0.41
   0 -10  -5    2.11    0.45
   0 -10   5    3.02    0.88
   0  10  -5    1.89    0.35
   0 -10  -5    2.45    0.55
  -3  11  -3    7.36    0.40
  -3  11  -3    6.71    0.45
  -3 -11  -3    7.45    0.55
   3 -11   3    5.28    0.89
  -3 -11  -3    7.27    0.58
   4  -8  -6   24.12    0.78
  -4   8   6   25.90    0.59
   4   8  -6   24.96    0.78
   4  -8  -6   25.86    1.13
   4   8  -6   24.86    1.08
   3   4  -8   37.42    1.59
   3  -4  -8   37.47    1.50
   3   4  -8   37.05    1.46
  -3   4   8   37.75    1.37
   3  -4  -8   36.36    1.27
   3   4  -8   39.96    1.68
   3  -4  -8   31.27    1.48
  -2 -12   1   36.96    1.56
   2 -12  -1   37.79    1.56
  -2  12   1   38.01    1.31
   1 -10  -5   12.54    0.79
  -1 -10   5   12.48    1.04
   1  10  -5   12.70    0.71
   1 -10  -5   13.14    0.65
   1  10  -5   13.23    0.58
 -10   6   2   30.44    0.68
 -10  -6   2   30.65    1.21
  10  -6  -2   28.65    1.34
  10  -6  -2   32.51    2.95
  -8   6   5   52.75    1.71
   8  -6  -5   56.18    2.05
   5   1  -8    7.93    0.81
   5  -1  -8   10.36    0.78
   5  -1  -8    9.93    0.44
   5   1  -8   10.73    0.79
  -4   9  -5   31.91    1.15
  -4  -9  -5   33.26    1.21
  -4   9  -5   33.21    1.25
  -4  -9  -5   33.98    1.28
   4  -9   5   35.51    1.95
  -2  12  -1    2.56    0.31
   2 -12   1    3.96    0.70
  -2 -12  -1    2.28    0.40
  -8   9   0   30.68    1.10
   8  -9   0   32.13    1.65
   8  -9   0   24.16    3.09
  -6   3  -7    0.25    0.30
  -6  -3  -7    0.23    0.30
   6  -3   7    0.21    0.79
  -6   3  -7    0.33    0.25
  -6   3  -7    0.23    0.33
  -6  -3  -7    0.13    0.28
   5 -11   1   -0.36    0.64
  -5 -11  -1    0.24    0.41
   5 -11   1   -4.26    1.99
  -5  11  -1    0.16    0.22
  -5  11  -1   -0.09    0.23
 -11  -4  -1   14.05    0.51
  11  -4   1   15.01    1.42
 -11   4  -1   12.90    0.48
  11  -4   1   11.22    2.26
  -8  -2  -6  109.96    3.32
  -8   2  -6  113.91    3.48
  -8  -2  -6  109.90    3.36
  -8   2  -6  119.19    3.57
  -6   6  -6   20.63    0.69
  -6  -6  -6   20.05    0.66
  -6   6  -6   20.70    0.60
   6  -6   6   19.93    1.67
  -4 -10  -4  105.44    3.29
  -4 -10  -4  106.71    3.30
   4 -10   4  105.21    3.87
  -4  10  -4   96.16    2.95
  -4  10  -4  104.85    3.26
   8   4  -6  169.16    7.08
   8  -4  -6  197.96    6.65
  -8   4   6  186.58    5.50
 -11   3  -2    1.36    0.27
 -11  -3  -2    1.51    0.28
  11  -3   2    1.60    0.85
  11  -3   2    2.53    1.45
  -1 -10  -5  163.67    4.98
  -1  10  -5  139.52    4.21
  -1  10  -5  160.01    4.85
   1 -10   5  162.26    5.48
  -9   6   4   44.59    1.49
   9  -6  -4   42.85    1.78
  -5  -7  -6   43.28    1.52
   5  -7   6   47.29    2.67
  -5   7  -6   44.83    1.58
  -5   7  -6   44.29    1.49
  -5  -7  -6   46.71    1.57
  -8   9   1   -0.18    0.24
   8  -9  -1    0.48    0.61
   8  -9  -1    0.37    1.80
 -10  -4   4  211.24    6.26
  10   4  -4  206.97    8.06
 -10   4   4  200.94    5.86
  10  -4  -4  187.74    7.39
   9  -7  -3    0.84    0.46
   9  -7  -3   -1.02    1.72
  -9   7   3    0.28    0.24
   0  12   2    0.70    0.21
   0 -12  -2    0.19    0.39
   0  12  -2    0.53    0.30
   0 -12   2    0.92    0.67
   0  12  -2    0.66    0.34
   9  -8   0   70.96    2.80
  -9   8   0   71.02    2.21
   9  -8   0   72.00    4.78
   0  -5   8    0.56    0.97
   0   5  -8    0.56    0.27
   1  -5  -8   13.62    0.50
  -1  -5   8   15.33    1.41
   1   5  -8   15.39    0.60
   1  -5  -8   16.19    0.93
  -9   3  -5  101.26    3.12
   9  -3   5   85.60    3.50
  -9  -3  -5  100.05    3.09
  -9   3  -5  100.88    3.06
  -9  -3  -5   94.00    2.88
  -2   7  -7   22.15    0.70
  -2   7  -7   22.41    0.74
  -2  -7  -7   23.65    0.77
   2  -7   7   20.21    1.68
  -2   7  -7   22.83    0.65
   0  -9  -6   18.59    0.83
   0   9  -6   18.52    0.66
   0  -9   6   15.32    1.42
   0  -9  -6   18.50    0.66
   0   9  -6   17.31    0.73
  -7  -8  -4   19.69    0.63
   7  -8   4   21.88    1.55
   7  -8   4   22.83    1.77
  -7   8  -4   20.99    0.59
  -7  -8  -4   18.75    0.60
  -7   8  -4   19.38    0.61
  -4   2  -8   80.49    2.54
  -4   2  -8   82.66    2.59
  -4  -2  -8   82.61    2.66
  -4  -2  -8   81.48    2.58
  -4   2  -8   83.35    2.67
   1 -12  -2   78.58    3.02
  -1 -12   2   78.69    2.79
  -1  12   2   80.54    2.52
   1  12  -2   78.71    2.53
   1 -12  -2   75.51    2.55
   0 -11   4    4.57    0.88
   0  11  -4    3.20    0.43
   0 -11  -4    4.34    0.64
   0  11  -4    4.34    0.41
  -2 -10   5    2.63    0.80
   2  10  -5    2.75    0.53
   2 -10  -5    3.11    0.68
   2 -10  -5    2.67    0.39
  11   4  -2    2.09    0.97
 -11  -4   2    2.03    0.31
  11  -4  -2    1.24    2.45
   1   9  -6    4.19    0.41
   1  -9  -6    4.34    0.40
   1   9  -6    5.06    0.51
   1  -9  -6    4.81    0.64
  -1  -9   6    2.38    0.93
  -9   0   6   13.57    0.58
   9   0  -6   12.02    1.62
  -9   8   1    2.95    0.30
   9  -8  -1    4.37    2.48
  -9  -8   1    2.44    0.36
   9  -8  -1    3.24    0.76
   1 -12   2   90.13    3.18
  -1  12  -2   77.63    2.68
  -1  12  -2   85.68    2.71
  -1 -12  -2   82.94    2.75
 -10   1   5  199.95    5.90
  10   1  -5  186.33    7.72
  10  -1  -5  194.67    7.62
  -7 -10   0    8.05    0.56
   7 -10   0    8.30    0.81
   7 -10   0   10.15    2.47
  -7  10   0    8.15    0.41
   1  11  -4   12.61    0.53
   1  11  -4   13.56    0.71
   1 -11  -4   12.43    0.87
   1 -11  -4   11.44    0.66
  -1 -11   4   12.78    0.90
   5   2  -8   12.89    0.81
   5   2  -8   12.10    0.82
   5  -2  -8   14.01    0.49
  -5   2   8   12.35    0.56
   5  -2  -8   11.43    0.83
   3  -7  -7  153.25    4.59
   3   7  -7  163.73    5.18
   3  -7  -7  153.79    4.80
   8  -9   1  140.90    6.81
  -8  -9  -1  147.25    4.45
  -8   9  -1  149.32    4.40
   8  -9   1  135.86    4.62
 -11   0  -3    0.12    0.21
  -7   3   7    0.19    0.26
   7   3  -7    0.30    0.69
   7  -3  -7    0.52    0.56
  -3  12   0    0.88    0.24
  -3 -12   0    1.48    0.46
  -5   5  -7   27.63    0.69
  -5  -5  -7   27.12    0.76
  -5   5  -7   26.89    0.78
   5  -5   7   26.27    1.83
  -5   5  -7   27.96    0.69
  -9  -1   6    0.81    0.34
   9   1  -6    1.08    1.34
   9  -1  -6    1.08    1.12
  -9   1   6    0.48    0.32
  -4   6  -7   22.75    0.65
   4  -6   7   21.61    1.82
  -4   6  -7   22.08    0.62
  -4  -6  -7   22.45    0.72
  -1  -5  -8   99.07    3.12
  -1   5  -8  106.07    3.26
  -1   5  -8  102.82    3.20
   1  -5   8  106.26    4.20
   1 -11   4   17.01    1.16
  -1  11  -4   17.67    0.58
  -1 -11  -4   17.36    0.73
  -1  11  -4   16.13    0.66
  -1 -11  -4   16.51    0.81
  -1  -9  -6    8.49    0.61
   1  -9   6    8.68    1.05
  -1   9  -6    9.12    0.53
  -1   9  -6    9.09    0.51
   8  -7   4   39.57    2.32
   8  -7   4   37.51    2.13
  -8  -7  -4   42.85    1.46
  -8   7  -4   40.72    1.42
  -8   7  -4   42.41    1.43
  -8  -7  -4   41.96    1.45
   7 -10  -1   16.68    0.93
   7 -10  -1   17.23    2.51
  -7  10   1   17.82    0.53
  11   3  -3    6.69    1.66
 -11  -3   3    6.51    0.47
  11  -3  -3    5.57    2.33
  -8   8  -3   68.45    2.21
  -8  -8  -3   64.98    2.09
  -8   8  -3   69.68    2.19
   8  -8   3   63.48    3.39
   8  -8   3   68.30    3.04
  -8  -8  -3   65.76    2.12
  10  -3   4    2.58    0.82
  10  -3   4    1.96    0.86
 -10   3  -4    3.50    0.41
 -10   3  -4    2.92    0.29
   2   5  -8    0.35    0.32
   2  -5  -8    0.27    0.27
  -2  -5   8    0.06    0.87
   2  -5  -8   -0.38    0.48
   2  -5  -8    0.40    0.48
 -11  -1  -3   27.01    0.63
 -11   1  -3   26.16    0.61
   5  -9  -5    3.86    0.45
   5  -9  -5    3.52    0.81
  -5   9   5    4.77    0.28
   7  -9   3   13.20    1.29
  -7  -9  -3   12.52    0.58
  -7   9  -3   11.51    0.50
   7  -9   3   11.38    1.87
  -7  -9  -3   12.23    0.52
  -4 -11   3    2.74    0.66
  -4  11   3    3.55    0.28
   4 -11  -3    3.85    0.96
   4 -11  -3    3.84    0.54
   6 -10  -3   34.16    2.13
  -6  10   3   35.35    1.21
   6 -10  -3   32.38    1.40
  -5 -11   2   31.82    1.42
   5 -11  -2   31.90    1.43
  -5  11   2   33.11    1.15
   5 -11  -2   33.73    2.23
  -6  -9  -4    1.26    0.29
   6  -9   4    1.15    0.94
  -6   9  -4    0.93    0.28
  -6  -9  -4    1.03    0.33
  -6   9  -4    1.22    0.30
  -7   5  -6    4.47    0.40
  -7  -5  -6    5.06    0.41
  -7   5  -6    4.60    0.31
   9  -8   1   15.57    2.83
   9  -8   1   17.71    1.30
  -9   8  -1   15.37    0.51
  10  -6   2   -0.40    0.95
 -10   6  -2   -0.06    0.24
  10  -6   2   -1.05    1.75
   6  -7  -6   15.90    0.66
  -6   7   6   16.73    0.50
   6  -7  -6   18.15    1.17
  -2 -10  -5   21.73    0.75
  -2  10  -5   23.02    0.75
  -2 -10  -5   22.59    0.82
   2 -10   5   22.73    1.44
  -3  12   1   14.65    0.49
  -3 -12   1   15.59    0.85
   3 -12  -1   14.44    1.58
  10  -5   3    4.03    1.02
  10  -5   3    3.62    1.38
 -10   5  -3    4.86    0.34
   2  -9  -6    4.00    0.67
   2  -9  -6    4.06    0.48
  -2  -9   6    4.50    1.07
   2   9  -6    3.26    0.50
  -7   6   6   27.49    0.88
   7  -6  -6   26.99    1.01
  -2  12   2    4.45    0.31
  -2 -12   2    5.42    0.72
   2 -12  -2    4.76    0.91
  -4   8  -6   92.05    2.35
  -4  -8  -6   90.38    2.30
  -4   8  -6   92.25    2.26
   4  -8   6   87.60    3.32
  -4  -8  -6   90.17    2.22
  -3  -4  -8  173.07    4.11
  -3   4  -8  172.76    3.95
  -3   4  -8  181.98    1.99
  -3   4  -8  176.91    1.78
   3  -4   8  169.36    5.13
  -8   3  -6   58.76    1.60
  -8  -3  -6   56.42    1.51
  -8  -3  -6   56.44    1.54
   8  -3   6   56.78    2.58
  -8   3  -6   61.15    1.59
   3 -12   1   48.44    1.73
  -3 -12  -1   48.15    1.54
  -3  12  -1   47.91    1.31
   2 -11  -4    0.30    0.64
   2  11  -4    0.35    0.37
   2 -11  -4    0.03    0.45
  -2 -11   4   -0.71    0.65
  -7  10  -1   43.72    1.27
  -7  10  -1   45.51    1.25
  -7 -10  -1   45.09    1.39
   7 -10   1   43.98    1.80
   7 -10   1   36.95    3.47
   5   6  -7    3.29    0.66
  -5   6   7    4.46    0.31
   5  -6  -7    5.24    0.46
 -10   2   5   -0.03    0.30
  10   2  -5    1.12    1.79
  10  -2  -5   -1.40    1.52
  -7  -7  -5    6.07    0.41
  -7   7  -5    5.85    0.38
  -7  -7  -5    6.37    0.43
   7  -7   5    6.97    1.05
   7  -7   5    4.88    1.29
  -7   7  -5    6.12    0.43
   6  -5  -7   18.73    0.68
   6   5  -7   17.00    1.00
  -6   5   7   19.33    0.60
   6  -5  -7   18.79    1.05
   5 -10  -4    4.64    0.51
   5 -10  -4    5.47    1.01
  -5  10   4    6.01    0.33
  -6   8  -5    1.09    0.35
  -6  -8  -5    1.14    0.28
   6  -8   5    0.77    0.78
  -6   8  -5    0.73    0.26
  -6  -8  -5    0.83    0.33
   8  -9  -2   52.24    3.25
  -8   9   2   58.42    1.50
   8  -9  -2   60.15    2.02
 -11  -5   0    4.02    0.37
 -11   5   0    4.15    0.35
  11  -5   0    3.35    1.01
  11  -5   0    4.73    2.56
   4   4  -8   23.72    0.95
   4  -4  -8   23.13    0.63
  -4   4   8   26.08    0.74
   4  -4  -8   25.31    1.00
   4   4  -8   24.25    1.02
  12   0   0   65.66    3.23
 -12   0   0   62.47    1.61
  -7   0  -7    0.23    0.28
  -7   0  -7    0.17    0.27
   2 -12   2    4.75    0.76
  -2  12  -2    4.63    0.35
  -2  12  -2    4.73    0.39
  -2 -12  -2    4.74    0.53
  -9   2   6   16.66    0.61
   9   2  -6   18.61    2.10
   9  -2  -6   16.78    1.61
  12   0  -1   -0.86    1.47
 -12   0   1    0.27    0.26
  -9   5   5   24.19    0.64
   9  -5  -5   28.66    2.17
  11   5  -1    3.60    0.84
  11  -5  -1    2.87    0.89
  11  -5  -1    0.35    2.49
 -11  -5   1    3.25    0.35
  -5  11  -2   18.43    0.56
  -5 -11  -2   18.92    0.77
  -5  11  -2   18.10    0.62
  -4   3  -8   38.58    1.15
  -4   3  -8   40.04    1.19
  -4  -3  -8   39.54    1.25
  -4   3  -8   40.05    1.26
  -3 -10   5   50.70    2.01
   3 -10  -5   56.62    1.95
   3  10  -5   54.34    1.85
   3 -10  -5   53.48    1.58
 -11  -2  -3    2.16    0.27
 -11   2  -3    1.72    0.23
  11  -2   3    1.37    0.97
  12  -1   0   -0.15    1.54
 -12   1   0    0.94    0.26
  12   1   0    0.56    1.20
 -12  -1   0    0.99    0.26
  -6  -4  -7   16.06    0.60
  -6   4  -7   15.96    0.63
  -6  -4  -7   15.89    0.61
   6  -4   7   16.28    1.52
  -6   4  -7   14.71    0.51
   4 -11   3    1.74    0.87
  -4 -11  -3    1.36    0.46
  -4  11  -3    1.37    0.30
  -4  11  -3    1.79    0.28
  -7   1  -7   54.91    1.55
  -7  -1  -7   53.86    1.51
  -7   1  -7   50.88    1.39
  -7   1  -7   50.43    1.36
  10  -7   0    0.22    0.83
 -10   7   0   -0.00    0.25
  10  -7   0   -0.43    2.32
 -10  -7   0    0.47    0.25
  -9  -8   2    2.51    0.36
  -9   8   2    2.45    0.29
   9  -8  -2   -0.48    2.04
   9  -8  -2    2.10    0.61
 -11   0   4  144.62    3.39
  11   0  -4  128.56    5.90
  -2 -11  -4   11.22    0.64
  -2 -11  -4   10.79    0.63
  -2  11  -4   10.19    0.45
   2 -11   4   12.02    1.12
  -2  11  -4   11.18    0.56
  12  -1  -1    5.75    2.16
  12   1  -1    6.92    1.62
 -12   1   1    7.43    0.39
 -12  -1   1    7.15    0.40
 -11   4  -2  140.30    3.21
  11  -4   2  139.71    4.45
  11  -4   2  139.83    5.05
 -11  -4  -2  140.12    3.22
   9  -7   3    1.97    0.95
  -9   7  -3    1.73    0.30
  -9  -7  -3    1.06    0.26
   9  -7   3    1.17    1.51
  -9   7  -3    1.66    0.32
  -9  -7  -3    1.17    0.32
  -2  -9  -6    1.40    0.47
   2  -9   6    0.77    1.02
  -2   9  -6    1.76    0.36
  -2   9  -6    1.54    0.33
  -5   3   8    0.65    0.30
   5  -3  -8    0.89    0.26
   5   3  -8   -0.40    0.51
   5  -3  -8    0.69    0.59
   5   3  -8    0.21    0.47
 -10   7   1    4.61    0.34
  10  -7  -1    7.10    2.74
 -10  -7   1    4.57    0.44
  10  -7  -1    4.09    0.80
  -2   5  -8    3.92    0.40
  -2  -5  -8    4.30    0.51
  -2   5  -8    4.21    0.36
   2  -5   8    2.71    1.12
  -2   5  -8    4.37    0.49
  -3   7  -7    4.85    0.42
   3  -7   7    5.50    1.40
  -3   7  -7    4.56    0.47
  -3   7  -7    5.56    0.37
  -3  -7  -7    6.12    0.51
  10  -6  -3   50.43    3.50
 -10  -6   3   59.95    1.67
  10  -6  -3   56.47    2.10
 -10   6   3   62.80    1.60
 -11  -1   4   21.13    0.69
  11   1  -4   19.65    2.79
  11  -1  -4   20.61    2.77
   3  -5  -8   22.75    0.65
  -3   5   8   22.68    0.65
   3  -5  -8   22.85    0.93
   5  -8  -6   30.21    1.42
   5   8  -6   24.84    1.19
   5  -8  -6   30.78    1.08
  -5   8   6   28.93    0.87
   6 -10   3  101.07    3.22
  -6  10  -3  106.77    2.54
  -6  10  -3  101.60    2.49
  -6 -10  -3  103.73    2.57
   6 -10   3  104.89    4.38
  -5   0  -8   32.69    1.08
  -5   0  -8   31.42    1.00
   9  -4   5    0.57    1.04
  -9   4  -5    0.73    0.25
  -9  -4  -5    0.61    0.29
  -9   4  -5    0.61    0.34
  -9  -4  -5    0.75    0.30
   7 -10  -2   25.22    2.27
  -7  10   2   26.23    0.62
   7 -10  -2   25.44    1.09
  11  -5   1   44.89    2.27
 -11   5  -1   45.89    1.25
  11  -5   1   41.25    3.20
 -11  -5  -1   43.69    1.23
  -8   0   7    0.36    0.30
   8   0  -7    0.28    0.87
  -3  -9   6    2.90    0.91
   3  -9  -6    2.74    0.68
   3   9  -6    2.84    0.55
   3  -9  -6    2.83    0.41
  12   0   1    1.39    1.12
 -12   0  -1   -0.20    0.21
  -6  11   0   58.12    1.51
   6 -11   0   54.24    1.93
   6 -11   0   57.52    3.93
  -6  11   0   50.81    1.53
  -6 -11   0   58.38    1.73
  -8   5   6   45.77    1.28
   8  -5  -6   50.54    2.33
   8  -6   5   49.40    2.53
  -8   6  -5   49.76    1.35
  -8  -6  -5   47.68    1.34
   8  -6   5   54.66    2.33
  -8   6  -5   49.52    1.40
   4  -7  -7    3.72    0.72
   4  -7  -7    4.62    0.43
   4   7  -7    4.64    0.67
  -5  -1  -8   52.17    1.44
  -5   1  -8   51.05    1.42
  -5   1  -8   49.85    1.47
  -5  -1  -8   48.85    1.44
   9  -6   4   46.58    2.29
  -9  -6  -4   44.57    1.26
  -9  -6  -4   47.40    1.29
  -9   6  -4   49.32    1.33
   9  -6   4   48.59    2.44
  -9   6  -4   47.21    1.35
   6   0  -8   26.19    1.13
  -8  -9  -2    2.47    0.40
  -8   9  -2    3.28    0.27
   8  -9   2    4.23    1.01
  -8   9  -2    3.53    0.37
   8  -9   2    2.51    2.10
   7  -4  -7    0.95    0.75
  -7   4   7    0.32    0.26
  10  -5  -4    6.77    1.91
 -10  -5   4    6.24    0.48
 -10   5   4    6.64    0.38
 -12  -2   0    1.08    0.26
 -12   2   0    1.24    0.29
  12  -2   0    3.86    1.83
  12   2   0    0.13    1.05
  -7   2  -7  145.02    3.43
  -7  -2  -7  136.11    3.23
  -7   2  -7  143.19    3.30
  -7   2  -7  140.65    3.26
  -7  -2  -7  138.61    3.23
   1   0  -9   -0.25    0.33
   1   0  -9   -0.20    0.39
  -5  -9  -5   21.75    0.71
  -5   9  -5   23.17    0.61
  -5  -9  -5   21.72    0.68
   5  -9   5   22.26    1.61
  -5   9  -5   23.98    0.73
   3 -12  -2   12.46    0.74
   3 -12  -2   12.33    1.29
  -3  12   2   11.73    0.45
  -3 -12   2   12.88    0.79
   0   0  -9   -0.01    0.32
   0   0  -9   -0.21    0.39
  10  -7   1   50.22    3.71
  10  -7   1   50.41    2.24
   8  -1  -7    4.18    1.05
  -8   1   7    4.27    0.40
   8   1  -7    4.19    1.07
  -8  -1   7    3.77    0.39
   3  11  -4   13.17    0.83
   3 -11  -4   13.99    1.03
   3 -11  -4   13.28    0.68
  -3 -11   4   13.77    0.99
  12   1   1    1.62    0.99
  12  -1   1   -0.82    1.19
 -12   1  -1    1.54    0.30
 -12  -1  -1    0.94    0.25
 -12  -2   1    1.52    0.31
  12   2  -1    1.43    1.34
 -12   2   1    1.86    0.30
  12  -2  -1    1.61    2.00
  10   3  -5   97.57    4.99
 -10   3   5  101.71    2.46
 -10  -3   5  105.60    2.64
  10  -3  -5   95.61    4.08
   3 -10   5   62.59    2.47
  -3  10  -5   58.95    1.66
  -3 -10  -5   60.66    1.73
  -3 -10  -5   61.12    1.68
   0   8  -7   15.56    0.71
   0  -8  -7   13.55    0.56
   0  -8  -7   13.96    0.73
   0   8  -7   15.27    0.63
   0  -8   7   15.09    1.43
  -4  12   0    1.38    0.26
   4 -12   0    0.92    0.66
  -4 -12   0    1.42    0.45
  -6  11   1    5.65    0.36
   6 -11  -1    6.96    1.88
  -6  11   1    5.62    0.37
  -6 -11   1    5.25    0.54
   6 -11  -1    5.31    0.61
   6  -1  -8    0.46    0.64
   6   1  -8    0.60    0.55
  -6   1   8   -0.23    0.26
  11  -4  -3   33.64    3.29
 -11   4   3   35.82    1.05
  11   4  -3   37.86    2.26
 -11  -4   3   40.09    1.25
   8  -8  -4   38.90    2.30
   8  -8  -4   32.87    1.28
  -8   8   4   38.44    1.08
  -5 -10  -4   40.72    1.26
  -5  10  -4   42.40    1.28
  -5 -10  -4   41.76    1.29
   5 -10   4   38.57    1.91
  10  -4   4   25.21    1.58
 -10   4  -4   22.71    0.60
 -10   4  -4   25.46    0.76
  10  -4   4   22.73    1.62
   1   8  -7    3.39    0.49
   1  -8  -7    2.19    0.40
   1  -8  -7    2.75    0.55
  -1  -8   7    2.99    1.10
 -12   0   2   49.96    1.37
  12   0  -2   55.10    3.78
  11   5  -2    0.98    0.68
 -11  -5   2   -0.08    0.32
 -11   5   2    0.08    0.25
   0 -12  -3  144.25    3.78
   0  12  -3  148.74    3.54
   0  12  -3  135.57    3.47
   0 -12  -3  138.02    3.39
   0 -12   3  135.81    3.68
   1   1  -9    3.40    0.54
   1  -1  -9    3.91    0.50
   1   1  -9    4.04    0.44
   1  -1  -9    3.41    0.49
   9  -3  -6    2.21    1.19
   9   3  -6    2.08    1.50
  -9   3   6    1.75    0.31
 -11   2   4   10.42    0.48
  11  -2  -4   10.74    2.46
  11   2  -4   10.20    2.19
 -11  -2   4   10.54    0.57
   0  -1  -9   91.88    2.51
   0  -1  -9   91.90    2.36
   0   1  -9  100.30    2.52
   0   1  -9   91.65    2.48
   9  -8   2  117.46    3.78
  -9   8  -2  117.25    2.86
  -9  -8  -2  108.55    2.62
   9  -8   2  113.58    5.05
  -3 -12  -2    2.51    0.51
  -3  12  -2    2.25    0.30
  -3  12  -2    2.73    0.31
   3 -12   2    2.92    0.70
   1 -12  -3   -0.09    0.56
   1  12  -3    0.06    0.26
   1  12  -3    0.60    0.36
  -1 -12   3    0.91    0.57
 -11   3  -3    8.32    0.41
  11  -3   3    7.52    1.11
  11  -3   3    6.06    1.09
   7  -9  -4    0.46    0.45
  -7   9   4    0.64    0.22
   7  -9  -4    1.65    1.23
 -12  -1   2    1.90    0.27
 -12   1   2    2.33    0.31
  12  -1  -2    2.83    2.27
  12   1  -2   -1.56    1.61
   7  -8  -5    3.53    1.05
  -7   8   5    0.64    0.22
   7  -8  -5    0.92    0.46
   4 -12  -1   76.61    2.26
  -4 -12   1   73.35    2.13
  -4  12   1   76.68    1.90
   4 -12  -1   74.25    3.44
  -6  11  -1   91.53    2.29
  -6  11  -1   95.64    2.30
   6 -11   1   95.42    2.89
  -6 -11  -1  100.02    2.58
   6 -11   1  102.40    5.27
  -7 -10  -2    9.83    0.58
   7 -10   2    7.77    2.14
  -7  10  -2    8.75    0.44
   7 -10   2    8.91    1.04
  -7  10  -2    8.67    0.42
   2   0  -9    0.43    0.40
   2   0  -9    0.41    0.50
  -8  -4  -6   32.57    1.02
  -8  -4  -6   32.72    1.02
  -8   4  -6   34.21    1.08
  -8   4  -6   33.12    1.00
   8  -4   6   31.63    1.97
  -1   0  -9    0.66    0.39
  -1   0  -9    0.25    0.30
   0  -6   8    0.38    0.90
   0   6  -8    0.17    0.39
   0  -6  -8   -0.26    0.23
   0   6  -8   -0.11    0.22
   0  -6  -8   -0.25    0.40
  10  -7  -2    2.75    0.68
  10  -7  -2    2.81    2.30
 -10   7   2    2.19    0.28
 -10  -7   2    2.30    0.41
   1   6  -8    0.95    0.42
   1  -6  -8    1.24    0.32
  -1  -6   8    1.38    0.94
   1  -6  -8    0.54    0.36
   1 -12   3   -0.07    0.68
  -1 -12  -3   -0.35    0.43
  -1  12  -3   -0.11    0.24
  -1  12  -3    0.13    0.29
   1  -8   7   -0.63    0.92
  -1  -8  -7    0.11    0.27
  -1  -8  -7    0.62    0.42
  -1   8  -7   -0.16    0.25
  -1   8  -7   -0.50    0.30
   8  -7  -5    1.28    0.43
   8  -7  -5    2.20    1.08
  -8   7   5    2.50    0.28
  -5   2  -8   70.06    1.81
  -5   2  -8   64.73    1.69
  -5   2  -8   67.14    1.82
  -5  -2  -8   66.57    1.80
  -4  12  -1   43.94    1.31
  -4  12  -1   50.76    1.37
  -4 -12  -1   51.09    1.59
   2  -8  -7   15.72    0.61
   2  -8  -7   15.81    0.85
  -2  -8   7   18.56    1.50
   2   8  -7   15.16    0.79
  -3 -11  -4   16.57    0.70
  -3  11  -4   15.43    0.56
  -3 -11  -4   16.17    0.71
  -3  11  -4   14.48    0.60
   3 -11   4   17.02    1.28
   8   2  -7    5.24    1.11
  -8   2   7    5.98    0.44
   8  -2  -7    5.37    1.01
   2   1  -9   47.32    1.64
   2  -1  -9   47.54    1.67
   2  -1  -9   44.70    1.41
   2   1  -9   46.47    1.43
 -12   2  -1   54.58    1.43
  12   2   1   51.38    2.27
  12  -2   1   50.97    2.99
 -12  -2  -1   51.12    1.37
  -6  -7  -6   68.79    1.77
  -6   7  -6   68.59    1.75
  -6  -7  -6   65.32    1.73
   6  -7   6   67.13    3.01
  -6   7  -6   67.20    1.80
  -1   1  -9   73.54    1.94
  -1  -1  -9   68.94    1.97
  -1   1  -9   72.95    2.05
  -1  -1  -9   72.21    1.91
   5 -11  -3    0.10    0.95
  -5 -11   3    0.35    0.63
   5 -11  -3    0.50    0.50
  -5  11   3    0.15    0.18
   6  -2  -8    1.24    0.70
   6   2  -8    1.55    0.57
  -6   2   8    1.81    0.30
   9  -7  -4    0.97    0.50
  -9   7   4    1.68    0.30
   9  -7  -4   -0.08    1.33
  -3  -9  -6    0.48    0.39
   3  -9   6    1.08    0.88
  -3   9  -6    0.40    0.31
  -3  -9  -6    0.67    0.39
  -3   9  -6    0.28    0.31
  -4   4  -8   26.36    0.77
   4  -4   8   25.30    1.75
  -4   4  -8   26.70    0.91
  -4   4  -8   26.45    0.89
  -4  -4  -8   26.42    0.76
   4 -10  -5   34.35    1.55
   4 -10  -5   34.68    1.20
   4  10  -5   31.11    1.34
 -10   0  -5    0.36    0.22
 -10   0  -5    0.08    0.30
  -5  -6  -7    9.44    0.52
  -5   6  -7    8.50    0.45
   5  -6   7    7.46    1.36
   1   2  -9   83.65    2.36
   1   2  -9   81.35    2.13
   1  -2  -9   81.53    2.37
   1  -2  -9   72.93    1.98
   3  -5   8    0.83    1.02
  -3   5  -8    0.29    0.29
  -3  -5  -8    0.90    0.32
  -3   5  -8    0.65    0.41
  -3   5  -8    0.18    0.26
   0   2  -9    5.04    0.52
   0   2  -9    4.74    0.46
   0  -2  -9    4.61    0.48
   0  -2  -9    4.50    0.51
  -1  -6  -8   19.71    0.74
   1  -6   8   18.04    1.55
  -1  -6  -8   19.93    0.63
  -1   6  -8   18.72    0.67
  -1   6  -8   19.22    0.61
  -1   6  -8   17.87    0.75
  -5   4   8   18.10    0.61
   5  -4  -8   17.66    0.94
   5  -4  -8   16.61    0.58
   2 -12  -3    5.56    0.85
   2 -12  -3    7.70    0.64
  -2 -12   3    5.78    0.79
   8  -9  -3    0.52    1.11
  -8   9   3    1.73    0.24
   8  -9  -3    1.41    0.61
   2   6  -8    9.48    0.63
  -2  -6   8    6.28    1.17
   2  -6  -8   10.35    0.49
  12  -2  -2   39.97    3.62
  12   2  -2   39.75    2.62
 -12  -2   2   39.80    1.19
 -12   2   2   39.81    1.14
   4  -5  -8    0.52    0.28
  -4   5   8    0.67    0.24
   4  -5  -8    1.89    0.70
  12   3   0    2.92    0.89
 -12  -3   0    3.65    0.34
  12  -3   0    2.54    2.05
 -12   3   0    4.46    0.34
 -10   1  -5   33.52    1.08
 -10   1  -5   33.62    0.99
 -10  -1  -5   32.92    1.06
  -7   3  -7   27.49    0.95
  -7   3  -7   26.05    0.65
  -7  -3  -7   26.43    0.72
  -7  -3  -7   25.26    0.72
  -7  -6  -6   14.27    0.56
  -7   6  -6   13.50    0.58
  -7   6  -6   14.64    0.52
  -6   9   5    0.74    0.21
   6  -9  -5    0.65    0.44
   6  -9  -5   -0.02    0.84
  12  -3  -1   33.93    3.25
  12   3  -1   33.38    1.97
 -12  -3   1   35.63    1.08
 -12   3   1   34.87    1.02
  -9   0  -6   57.43    1.56
 -10  -6  -3    2.37    0.28
 -10  -6  -3    2.32    0.30
 -10   6  -3    1.86    0.31
 -10   6  -3    2.39    0.38
  10  -6   3    4.25    1.22
  10  -6   3    3.58    1.15
  -5  -8  -6   29.45    0.97
   5  -8   6   29.51    2.00
  -5  -8  -6   26.89    0.92
  -5   8  -6   25.21    0.73
  -5   8  -6   28.39    0.89
   6 -11  -2   26.39    1.05
  -6  11   2   27.68    0.86
   6 -11  -2   26.72    2.13
   9  -8  -3    9.16    0.75
   9  -8  -3    9.90    1.63
  -9   8   3   10.31    0.43
   6  -5   7   31.23    2.02
  -6   5  -7   28.91    1.01
  -6  -5  -7   30.62    0.98
  -6   5  -7   28.60    0.90
  -2  12  -3   18.95    0.69
  -2  12  -3   18.58    0.60
   2 -12   3   16.66    0.99
  -2 -12  -3   19.31    0.77
   4  -9  -6    2.49    0.60
   4   9  -6    2.89    0.62
   4  -9  -6    2.92    0.48
 -11  -3   4    2.20    0.38
  11   3  -4    1.21    1.56
 -11   3   4    1.61    0.30
  11  -3  -4    1.53    1.95
   2   2  -9    5.14    0.50
   2  -2  -9    5.17    0.62
   2   2  -9    5.09    0.62
   2  -2  -9    4.54    0.51
  -1  -2  -9   24.31    0.88
  -1  -2  -9   24.41    0.76
  -1   2  -9   22.71    0.70
  -1   2  -9   22.04    0.82
   4  -7   7   24.63    1.83
  -4  -7  -7   26.27    0.66
  -4   7  -7   25.48    0.69
  -4   7  -7   26.03    0.79
  -4   7  -7   26.94    0.88
  -4  -7  -7   26.66    0.96
  11  -5   2   32.32    2.44
  11  -5   2   32.58    1.86
 -11   5  -2   33.12    0.88
  -6   6   7    0.68    0.21
   6   6  -7    0.96    0.48
   6  -6  -7   -0.04    0.32
   6  -6  -7    1.30    0.78
  -9   1  -6   20.11    0.74
  -9   1  -6   20.47    0.58
  -9  -1  -6   19.77    0.64
   3   0  -9   -0.27    0.53
  -2   8  -7    0.17    0.34
  -2  -8  -7    0.41    0.40
  -2   8  -7    0.27    0.34
   2  -8   7   -1.66    1.04
  -2   0  -9   -0.29    0.29
  -2   0  -9   -0.09    0.29
 -12   0  -2   45.55    1.12
  12   0   2   43.98    2.12
  11  -6   0   14.25    2.85
 -11  -6   0   10.20    0.47
  11  -6   0    8.73    1.13
  -5 -11  -3   87.77    2.01
  -5  11  -3   86.78    1.84
  -5  11  -3   86.50    1.94
   6 -10  -4   25.13    1.68
  -6  10   4   18.07    0.51
   6 -10  -4   24.94    1.02
   4 -11  -4    8.19    0.94
   4 -11  -4   12.24    0.68
  -4 -11   4   11.85    0.92
  10  -7   2   13.53    2.23
  10  -7   2   10.48    1.28
 -10   7  -2    9.14    0.40
  -9   6   5  120.90    2.43
  11  -6  -1   42.11    3.84
 -11   6   1   35.53    0.93
 -11  -6   1   43.61    1.19
  11  -6  -1   40.58    1.94
  10  -4  -5    5.61    1.39
 -10  -4   5    5.60    0.48
 -10   4   5    4.93    0.36
   4 -12  -2   10.00    1.41
  -4  12   2   10.18    0.42
   4 -12  -2    9.76    0.73
  -4 -12   2   10.57    0.76
  -5   3  -8    1.73    0.30
  -5  -3  -8    1.67    0.33
  -5   3  -8    2.24    0.41
  -5   3  -8    2.31    0.33
  -9   5  -5   20.42    0.67
   9  -5   5   21.31    1.38
   9  -5   5   20.89    1.71
  -9  -5  -5   19.97    0.70
   3   1  -9   26.97    0.99
   3  -1  -9   27.41    1.05
   3  -1  -9   28.02    1.25
   3   1  -9   28.45    1.24
   3   8  -7    4.42    0.60
   3  -8  -7    4.42    0.75
   3  -8  -7    4.15    0.45
  -2   1  -9   21.14    0.76
  -2  -1  -9   23.14    0.90
  -2   1  -9   21.03    0.85
  -2  -1  -9   20.18    0.76
   7 -10  -3    0.05    0.51
  -7  10   3    0.08    0.18
   7 -10  -3   -0.34    1.04
 -12   1  -2    2.32    0.29
  12  -1   2    2.94    0.95
  12   1   2    2.90    1.08
 -12  -1  -2    2.38    0.29
  -7   7   6    9.99    0.42
   7  -7  -6    8.50    0.59
 -10  -2  -5   12.41    0.55
 -10   2  -5   13.33    0.49
 -10   2  -5   14.41    0.59
 -11   0  -4   30.35    0.84
   9  -4  -6   11.57    1.33
  -9   4   6   14.29    0.55
   0 -13   0   -0.15    0.52
   0  13   0   -0.13    0.22
   8  -3  -7    0.61    0.79
  -8   3   7   -0.03    0.30
   8   3  -7   -1.95    0.95
   9  -9   0   47.33    3.95
   9  -9   0   55.04    1.98
  -9   9   0   53.54    1.26
 -12   3  -1  100.96    2.06
  12  -3   1   98.34    3.22
 -12  -3  -1   99.78    2.06
  12   3   1  116.04    3.39
  -5   7   7   36.84    0.95
   5  -7  -7   36.16    1.45
   5   7  -7   31.61    1.33
   5  -7  -7   37.55    1.11
   8  -8   4    6.00    1.23
  -8   8  -4    3.85    0.37
  -8   8  -4    5.00    0.38
  -8  -8  -4    3.92    0.39
  -8  -8  -4    4.38    0.38
   8  -8   4    2.48    1.15
   6  -3  -8    1.91    0.66
   6   3  -8    0.71    0.63
  -6   3   8    1.32    0.27
  -2   6  -8    0.81    0.25
  -2   6  -8    1.32    0.30
   2  -6   8    1.27    1.05
  -2  -6  -8    0.88    0.35
  -2  -6  -8    1.50    0.42
  -4 -10  -5  316.06    5.92
   4 -10   5  320.45    4.46
  -4 -10  -5  312.35    5.74
  -4  10  -5  328.24    2.54
  -7   9  -4    2.94    0.33
  -7   9  -4    2.87    0.35
   7  -9   4    3.94    1.10
  -7  -9  -4    2.64    0.35
  -7  -9  -4    3.21    0.37
   7  -9   4    2.11    1.07
  -6  11  -2    4.04    0.36
  -6 -11  -2    4.83    0.51
   6 -11   2    3.18    0.94
  -6  11  -2    4.19    0.35
   8 -10   0   39.28    3.56
   8 -10   0   41.41    1.66
  -8  10   0   46.80    1.14
 -11   4  -3    1.09    0.27
  11  -4   3    1.33    0.87
  11  -4   3    0.69    1.17
   7  -5  -7    5.02    0.89
  -7   5   7    5.06    0.35
 -11   1  -4   85.69    1.80
 -11  -1  -4   88.17    1.84
   1   3  -9   11.71    0.58
   1  -3  -9   11.12    0.78
   1  -3  -9    9.83    0.59
   1   3  -9   11.85    0.74
   9  -9  -1   34.69    3.45
   9  -9  -1   36.20    1.51
  -9   9   1   38.08    0.97
   0   3  -9  198.48    3.87
   0  -3  -9  208.38    4.09
   0   3  -9  201.98    4.12
   0  -3  -9  204.07    4.26
   3   6  -8    9.28    0.68
   3  -6  -8    8.02    0.48
   1  13   0    0.20    0.25
  -1  13   0   -0.10    0.20
   1 -13   0    0.14    0.57
  -1 -13   0    0.80    0.51
 -12   0   3    0.31    0.30
  12   0  -3   -2.18    1.84
  -6   8   6   -0.14    0.16
   6  -8  -6   -0.08    0.42
   6  -8  -6   -0.57    0.75
   4 -12   2    5.61    0.88
  -4  12  -2    5.06    0.38
  -4 -12  -2    5.58    0.51
  -4  12  -2    4.51    0.37
  -9   2  -6   19.95    0.74
  -9  -2  -6   17.19    0.60
  -9  -2  -6   17.32    0.58
  -9   2  -6   19.73    0.66
 -11   5   3    0.61    0.28
 -11  -5   3    0.65    0.36
  11   5  -3    0.12    0.70
  11  -5  -3    1.99    2.25
  -3 -12   3    0.48    0.64
   3 -12  -3    0.53    0.73
   3 -12  -3    0.96    0.49
  10  -5   4    6.10    1.22
 -10   5  -4    4.91    0.34
 -10  -5  -4    4.46    0.38
  10  -5   4    5.43    1.09
   8 -10  -1   57.01    1.88
  -8  10   1   56.75    1.31
   8 -10  -1   41.70    3.12
 -12  -3   2    2.36    0.31
 -12   3   2    2.30    0.31
  12   3  -2    1.95    1.19
  12  -3  -2   -0.23    2.61
   0  11  -5   13.44    0.66
   0 -11   5   12.62    1.11
   0  11  -5   13.33    0.58
   0 -11  -5   14.08    0.81
   0 -13  -1    0.22    0.58
   0  13  -1   -0.08    0.24
   0 -13   1    0.69    0.60
   0  13   1   -0.14    0.20
  11  -6   1   32.15    2.68
 -11   6  -1   29.73    0.81
  11  -6   1   29.28    1.84
 -12   1   3    8.72    0.45
  12  -1  -3   10.61    2.43
  12   1  -3    8.34    2.16
 -12  -1   3    8.80    0.49
   1  11  -5    8.00    0.58
   1 -11  -5    6.84    0.76
   1 -11  -5    7.81    0.58
   1  11  -5    7.99    0.48
  -1 -11   5    7.51    0.91
  -5 -12   0   41.89    1.31
   5 -12   0   47.05    1.64
  -5  12   0   42.62    1.08
   5 -12   0   40.35    3.07
   8  -6  -6   -0.01    1.02
  -8   6   6    0.56    0.23
   7  -8   5   50.41    2.13
   7  -8   5   35.60    2.04
  -7  -8  -5   42.45    1.09
  -7   8  -5   45.26    1.13
  -7  -8  -5   43.31    1.15
  -7   8  -5   44.40    1.18
   3   2  -9   10.36    0.82
   3  -2  -9    8.68    0.76
   3   2  -9   10.44    0.63
   3  -2  -9   10.68    0.72
   8  -9   3   -0.54    0.95
   8  -9   3    0.42    1.54
  -8   9  -3    0.11    0.24
  -8  -9  -3    0.20    0.33
   0 -10   6    2.85    1.02
   0 -10  -6    1.45    0.45
   0 -10  -6    1.25    0.54
   0  10  -6    1.04    0.42
  -2  -2  -9    9.61    0.60
  -2  -2  -9    8.93    0.53
  -2   2  -9    9.48    0.59
  -2   2  -9   10.26    0.49
  12   2   2    3.48    0.90
 -12   2  -2    2.26    0.26
 -12  -2  -2    2.67    0.28
 -10  -6   4   10.60    0.55
 -10   6   4    9.03    0.46
  -1 -10   6   10.78    1.19
   1 -10  -6    9.72    0.70
   1  10  -6   11.44    0.66
   1 -10  -6   11.61    0.61
   1  13  -1    2.89    0.33
  -1 -13   1    3.29    0.64
  -1  13   1    3.04    0.30
   1 -13  -1    3.25    0.64
  10  -7  -3   15.79    0.99
 -10   7   3   15.34    0.50
 -10  -7   3   14.09    0.62
  10  -7  -3   13.14    2.31
  -2   3   9  108.29    2.34
   2   3  -9  124.05    2.90
   2  -3  -9  126.44    2.75
   2   3  -9  125.59    2.71
   2  -3  -9  133.09    3.21
   8  -5   6    2.00    1.19
  -8  -5  -6    2.58    0.36
  -8   5  -6    2.77    0.32
  -8   5  -6    2.60    0.37
  -4 -11  -4   18.82    0.77
  -4  11  -4   17.93    0.58
   4 -11   4   18.45    1.29
  -4 -11  -4   19.78    0.83
  -4  11  -4   16.66    0.62
  -1 -13  -1   10.03    0.71
  -1  13  -1   10.39    0.47
   1 -13   1   10.52    0.81
  -1   3  -9    2.20    0.49
  -1  -3  -9    2.39    0.44
  -1   3  -9    2.85    0.38
  -1  -3  -9    2.66    0.46
   9  -9   1   18.59    1.32
  -9   9  -1   18.80    0.64
   9  -9   1   13.11    2.79
  -6   0  -8   11.21    0.53
  -6   0  -8   11.29    0.50
  -1  11  -5    9.69    0.52
   1 -11   5   11.60    1.12
  -1  11  -5   10.59    0.58
  -1 -11  -5    9.68    0.70
  -5 -12   1   43.20    1.40
   5 -12  -1   41.78    2.82
   5 -12  -1   41.65    1.43
  -5  12   1   46.51    1.14
  -8  10  -1   18.41    0.56
   8 -10   1   21.11    1.30
  -8  10  -1   20.67    0.73
   8 -10   1   13.57    2.76
 -12  -4   0   21.35    0.70
  12   4   0   26.88    1.52
 -12   4   0   23.95    0.73
  -7   4  -7   10.51    0.56
  -7  -4  -7    9.36    0.48
  -7   4  -7    9.45    0.42
   3 -12   3   28.01    1.37
  -3  12  -3   27.98    0.84
  -3 -12  -3   30.08    1.03
  -3  12  -3   27.57    0.91
 -10   8   0  182.91    3.46
  10  -8   0  180.01    4.51
  10  -8   0  176.15    6.96
 -11  -6   2   14.99    0.64
  11  -6  -2   11.50    2.72
 -11   6   2   14.14    0.50
  11  -2   4   -0.21    0.93
 -11   2  -4    0.34    0.24
 -11   2  -4    0.07    0.38
  10   0  -6    0.25    1.35
 -10   0   6    0.97    0.34
  -4   9  -6    1.34    0.34
  -4  -9  -6    2.52    0.40
  -4   9  -6    1.43    0.36
   4  -9   6    4.30    1.19
  -4  -9  -6    1.61    0.43
  12  -4  -1    4.37    2.35
 -12   4   1    4.37    0.34
  12   4  -1    2.96    0.90
 -12  -4   1    3.83    0.36
  -8   7  -5   29.86    0.91
  -8  -7  -5   26.41    0.80
   8  -7   5   30.01    1.68
  -8  -7  -5   29.19    0.88
  -8   7  -5   29.66    0.86
   8  -7   5   29.18    1.98
  -6   1  -8    2.70    0.35
  -6   1  -8    2.27    0.31
  -6  -1  -8    3.33    0.38
  -6  -1  -8    2.87    0.36
   2 -13   0    2.61    0.67
  -2 -13   0    2.16    0.54
  -2  13   0    1.89    0.31
   9  -8   3    3.16    1.60
   9  -8   3    4.73    1.15
  -9  -8  -3    2.69    0.35
  -9   8  -3    3.81    0.38
  -9   8  -3    4.18    0.34
  -9  -8  -3    2.88    0.34
  -1  10  -6    6.94    0.51
  -1 -10  -6    6.88    0.62
   1 -10   6    8.24    1.24
  -9  -7  -4    0.29    0.28
  -9   7  -4    0.03    0.23
   9  -7   4   -0.16    1.02
  -9  -7  -4    0.08    0.27
  -9   7  -4    0.03    0.26
   9  -7   4    0.43    0.98
 -10   8   1   20.10    0.65
 -10  -8   1   22.90    0.83
  10  -8  -1   20.32    1.26
  10  -8  -1   20.63    3.02
   6  -9   5    8.62    1.37
  -6   9  -5   10.52    0.54
  -6  -9  -5    9.21    0.51
  -6   9  -5    9.52    0.44
  -6  -9  -5   10.07    0.51
  -7   0   8    1.10    0.32
   7   0  -8    1.80    0.71
  -4   5  -8   29.33    0.88
  -4   5  -8   28.50    0.96
   4  -5   8   27.78    1.89
  -4  -5  -8   29.03    0.93
  -4   5  -8   28.23    0.86
 -10   3  -5    0.36    0.31
 -10  -3  -5    0.31    0.26
 -10   3  -5   -0.08    0.21
   5 -10  -5    4.65    0.50
   5 -10  -5    5.65    0.92
  -3   8  -7    1.47    0.37
  -3  -8  -7    1.38    0.37
   3  -8   7    2.95    1.37
  -3   8  -7    1.74    0.35
  -3  -8  -7    1.01    0.38
  -3   8  -7    1.88    0.28
   2 -11  -5   23.14    1.14
  -2 -11   5   23.41    1.37
   2 -11  -5   23.89    0.92
   2  11  -5   22.55    1.02
  -5  12  -1   23.37    0.72
  -5  12  -1   20.76    0.74
   5 -12   1   21.27    1.14
  -5 -12  -1   22.93    0.95
   7 -10   3   29.30    2.37
  -7  10  -3   28.49    0.89
  -7 -10  -3   27.87    0.91
   7 -10   3   28.80    1.62
  -7  10  -3   28.56    0.83
  10  -1  -6   45.86    2.94
 -10   1   6   40.17    1.12
 -10  -1   6   42.52    1.19
  10   1  -6   44.94    3.04
  -6 -10  -4   39.90    1.11
  -6 -10  -4   40.03    1.13
  -6  10  -4   45.06    1.21
   4   0  -9    0.08    0.50
   4   0  -9   -0.61    0.45
  -8   0  -7   -0.02    0.28
 -11  -4   4  112.60    2.44
  11   4  -4  102.12    4.05
  11  -4  -4   95.13    4.34
 -11   4   4  101.15    2.08
  12   2  -3   11.56    1.79
 -12   2   3   15.34    0.54
 -12  -2   3   15.98    0.61
  12  -2  -3   18.52    2.96
  -3   0  -9   -0.01    0.35
  -3   0  -9   -0.10    0.30
  -7  11   0    0.06    0.23
  -7  11   0    0.16    0.24
   7 -11   0   -1.64    2.11
  -7 -11   0    0.44    0.41
   7 -11   0    0.31    0.69
   2  10  -6    4.33    0.57
  -2 -10   6    4.98    0.94
   2 -10  -6    5.05    0.71
   2 -10  -6    4.83    0.48
   5  -5  -8    0.37    0.29
   5   5  -8    1.20    0.63
  -5   5   8    0.76    0.25
   5  -5  -8    0.64    0.64
  11   0  -5   -0.93    1.74
   7  -1  -8   20.14    1.26
  -7   1   8   18.21    0.64
   7   1  -8   17.62    1.16
   9  -9  -2  102.83    2.69
  -9  -9   2   93.38    2.08
   9  -9  -2   97.19    4.50
  -9   9   2  102.38    2.08
   4  -1  -9    8.37    0.85
   4   1  -9   12.09    0.88
   4  -1  -9    9.73    0.74
   4   1  -9   10.07    0.70
  -8  -1  -7   16.85    0.58
  -8  -1  -7   18.44    0.64
  -8   1  -7   17.93    0.57
  -8   1  -7   19.37    0.73
  -2  13   1    1.37    0.26
   2 -13  -1    1.20    0.57
  -2 -13   1    0.29    0.52
  -3  -1  -9   21.06    0.76
  -3   1  -9   21.14    0.75
  -3  -1  -9   19.35    0.79
  -3   1  -9   19.94    0.79
   4  -8  -7    2.89    0.44
   4  -8  -7    3.72    0.77
   4   8  -7    2.81    0.59
   5  -4   8   -0.08    1.00
  -5   4  -8   -0.16    0.29
  -5  -4  -8    0.27    0.36
  -5   4  -8    0.24    0.35
  -5   4  -8   -0.06    0.25
  -9   3  -6   22.21    0.77
  -9   3  -6   22.17    0.71
  -9  -3  -6   19.90    0.70
  -9  -3  -6   21.82    0.75
   7 -11  -1   -0.82    1.88
   7 -11  -1    1.55    0.71
  -7  11   1    2.08    0.28
 -11  -1   5    0.49    0.36
 -11   1   5    0.33    0.35
  11  -1  -5    3.17    1.93
  11   1  -5    0.08    1.99
   2 -13   1   20.67    1.09
  -2  13  -1   21.01    0.72
  -2 -13  -1   19.21    0.91
   8 -10  -2    2.92    0.62
  -8  10   2    2.55    0.28
   8 -10  -2    2.72    1.75
   0  12  -4   54.97    1.38
   0  12  -4   55.89    1.57
   0 -12  -4   53.27    1.66
   0 -12   4   53.27    1.93
   6 -11  -3   53.83    1.65
   6 -11  -3   51.55    2.53
  -6  11   3   50.59    1.19
  -3  -6  -8    6.44    0.51
   3  -6   8    6.30    1.23
  -3   6  -8    6.79    0.46
  -3   6  -8    5.51    0.38
  10  -8   1    5.18    2.62
  10  -8   1    4.94    1.00
   5   9  -6    2.30    0.57
   5  -9  -6    3.60    0.67
   5  -9  -6    3.09    0.43
  -8   4   7   10.45    0.48
   8  -4  -7   11.57    1.19
 -12  -4  -1   30.98    0.87
 -12   4  -1   30.70    0.84
  12  -4   1   29.85    1.75
  12  -4   1   31.84    2.78
   0  -7   8    8.74    1.30
   0  -7  -8   10.55    0.50
   0   7  -8   10.83    0.61
   0  -7  -8   11.70    0.67
  -2  11  -5   13.69    0.54
   2 -11   5   13.08    1.29
  -2 -11  -5   13.45    0.72
  -2  11  -5   13.50    0.61
  -2 -11  -5   13.35    0.68
   1  -7  -8    0.51    0.51
  -1  -7   8    1.16    1.02
   1  -7  -8    0.55    0.33
   1   7  -8    1.79    0.46
  -6   2  -8   54.45    1.38
  -6  -2  -8   53.66    1.37
  -6   2  -8   50.74    1.25
   1 -12  -4    0.18    0.56
   1  12  -4    1.41    0.34
   1  12  -4    1.11    0.42
   1 -12  -4    0.59    0.46
  -1 -12   4    1.40    0.76
   6  -4  -8   33.47    1.45
  -6   4   8   33.92    0.98
   3  -3  -9   57.22    1.34
  -3   3   9   53.95    1.37
   3  -3  -9   62.10    1.68
   3   3  -9   63.53    1.89
   3   3  -9   60.36    1.63
   3  -3  -9   54.34    1.79
  -2   3  -9  124.23    2.57
  -2  -3  -9  116.99    2.62
  -2   3  -9  119.31    2.61
  -2  -3  -9  125.45    2.63
  12  -3   2   57.71    2.82
 -12   3  -2   55.88    1.28
 -12  -3  -2   63.33    1.43
   4   6  -8   49.21    1.63
   4  -6  -8   46.83    1.22
   4  -6  -8   46.97    1.55
  10   2  -6   16.19    2.32
 -10   2   6   17.79    0.62
  10  -2  -6   15.10    1.97
   0 -13  -2    0.75    0.56
   0 -13   2    1.58    0.70
   0  13  -2    0.13    0.26
   1  -4  -9    1.09    0.41
   1   4  -9    0.72    0.33
   1   4  -9    0.55    0.48
   1  -4  -9    0.77    0.52
   0  -4  -9    8.06    0.54
   0   4  -9    7.97    0.47
   0   4  -9    8.54    0.56
  -7  11  -1   10.41    0.47
  -7 -11  -1   10.15    0.63
   7 -11   1   11.33    1.02
  -7  11  -1    9.93    0.43
   7 -11   1   12.34    2.48
 -10   5   5   39.43    1.02
  10  -5  -5   38.97    2.67
 -10  -5   5   33.99    1.03
  -1 -12  -4    4.96    0.66
   1 -12   4    4.64    0.84
  -1  12  -4    5.18    0.43
  -1  12  -4    5.31    0.46
  -1 -12  -4    5.43    0.58
  -2 -10  -6   32.60    1.08
  -2  10  -6   29.73    1.00
  -2  10  -6   32.44    0.97
  -2 -10  -6   29.68    0.97
   2 -10   6   29.68    1.74
  -5  11   4   48.15    1.14
   5 -11  -4   49.44    2.12
   5 -11  -4   49.02    1.46
   7  -2  -8    5.40    0.88
  -7   2   8    3.82    0.38
   7   2  -8    5.15    0.85
  12  -4  -2   -2.48    2.35
  12   4  -2    0.87    0.81
 -12  -4   2   -0.03    0.31
   9   0  -7   -0.84    1.08
  -9   0   7    0.32    0.28
  -6  -6  -7  172.63    3.39
   6  -6   7  177.30    4.93
  -6   6  -7  169.97    3.29
   1  13  -2    9.16    0.49
  -1 -13   2   10.24    0.82
   1 -13  -2    9.89    0.72
   4 -12  -3    2.87    0.92
  -4 -12   3    3.01    0.61
   4 -12  -3    2.35    0.51
  -5 -12   2    1.25    0.52
   5 -12  -2    1.61    0.60
  -5  12   2    2.03    0.27
   5 -12  -2    3.02    1.26
 -11   3  -4   74.71    1.62
 -11   3  -4   85.41    1.94
  11  -3   4   78.05    2.72
  -5  -7  -7   98.28    2.07
   5  -7   7   94.67    3.43
  -5  -7  -7   93.07    2.04
  -5   7  -7   93.07    2.08
  -5   7  -7   83.99    1.83
  -4   2   9    9.60    0.46
   4  -2  -9   10.90    0.78
   4   2  -9   12.44    0.87
   4  -2  -9   10.62    0.89
   4  -2  -9   11.08    0.49
   4   2  -9   11.69    0.73
  -8  -2  -7    0.33    0.30
  -8   2  -7    0.26    0.23
  -8  -2  -7    0.30    0.23
  -8   2  -7    0.13    0.35
  -9   5   6    3.15    0.31
   9  -5  -6    3.06    1.26
  -3  -2  -9    1.19    0.32
  -3   2  -9    1.36    0.35
  -3  -2  -9    1.42    0.40
  -3   2  -9    2.04    0.31
 -10  -8   2    0.95    0.32
  10  -8  -2    0.11    0.61
  10  -8  -2   -1.43    2.37
 -10   8   2    0.88    0.24
  -1 -13  -2   43.65    1.76
  -1  13  -2   42.43    1.59
   1 -13   2   42.78    1.91
  -1   7  -8   13.06    0.56
  -1  -7  -8   14.68    0.57
   1  -7   8   14.63    1.48
  -1  -7  -8   15.09    0.70
  -1   7  -8   15.58    0.72
 -11   6  -2    1.39    0.24
  11  -6   2    0.53    0.92
  11  -6   2    0.83    1.51
   8  -8  -5    2.39    1.37
  -8   8   5    3.77    0.31
   8  -8  -5    3.62    0.52
   0  -9  -7    1.12    0.46
   0   9  -7    1.88    0.31
   0  -9  -7    0.69    0.41
   0  -9   7    2.29    1.20
   0   9  -7    1.53    0.44
   8  -9  -4    0.99    0.51
   8  -9  -4    1.63    1.35
  -8   9   4    0.42    0.22
  11   2  -5   42.78    3.65
  11  -2  -5   38.93    3.32
 -11   2   5   45.44    1.65
 -11  -2   5   45.79    1.72
   2  -7  -8    1.42    0.47
   2  -7  -8    1.69    0.34
   2   7  -8    2.00    0.48
   1   9  -7   22.09    1.10
  -1  -9   7   22.27    1.80
   1  -9  -7   21.29    0.93
   1  -9  -7   19.35    0.69
   3 -11  -5   18.43    0.81
  -3 -11   5   19.41    1.20
   3 -11  -5   20.33    1.11
   3  11  -5   19.98    0.97
  11  -5   3   10.43    1.41
  11  -5   3    9.26    1.29
 -11   5  -3   11.55    0.44
  -9   1   7   39.16    1.50
  -9  -1   7   36.47    1.41
   9  -1  -7   41.53    2.48
   9   1  -7   38.20    2.59
  -3 -13   0    3.90    0.67
  -3  13   0    3.86    0.31
 -12   0  -3   -0.00    0.22
  12   0   3   -1.07    0.92
  -7  -7  -6    0.75    0.29
  -7   7  -6    1.54    0.32
  -7  -7  -6    0.88    0.29
  -7   7  -6    1.15    0.36
  12  -3  -3    1.24    2.40
  12   3  -3    4.03    1.37
 -12  -3   3    3.55    0.40
   3 -10  -6   24.02    1.35
   3  10  -6   21.64    1.20
   3 -10  -6   25.16    1.12
   2   4  -9    0.72    0.43
   2  -4  -9   -0.39    0.49
   2  -4  -9    0.44    0.50
   2  -4  -9   -0.21    0.31
   2   4  -9    0.40    0.35
   2 -12  -4    9.90    0.65
  -2 -12   4    9.95    0.96
   2  12  -4    8.69    0.67
   2 -12  -4   10.47    0.93
  -6   8  -6  105.16    3.52
  -6  -8  -6  100.84    3.38
   6  -8   6   95.58    4.23
  -6  -8  -6  103.12    3.41
  -6   8  -6   97.87    3.23
  -1  -4  -9    0.51    0.39
  -1   4  -9   -0.18    0.41
  -1   4  -9    0.06    0.27
   9  -9   2    3.71    1.04
   9  -9   2    6.58    2.25
  -9   9  -2    6.26    0.44
  -9  -6  -5   19.58    0.62
  -9   6  -5   17.70    0.62
   9  -6   5   18.38    1.66
   9  -6   5   18.51    1.43
  -9   6  -5   19.86    0.58
  10  -7   3   60.02    3.30
 -10   7  -3   63.38    2.16
 -10  -7  -3   62.21    2.16
  10  -7   3   62.16    3.13
 -10   7  -3   67.94    2.37
   9  -8  -4    6.64    0.68
  -9   8   4    7.13    0.37
   9  -8  -4    8.63    1.69
  -8  10  -2    1.47    0.29
   8 -10   2    1.82    1.74
  -8  10  -2    1.20    0.31
  -8 -10  -2    1.18    0.40
   8 -10   2    0.75    0.89
  -7   9   5   25.56    0.98
   7  -9  -5   26.90    1.26
   7  -9  -5   30.08    1.92
  -5 -10  -5   14.49    0.62
  -5 -10  -5   12.50    0.60
  -5  10  -5   12.16    0.47
  -5  10  -5   12.87    0.57
   5 -10   5   14.55    1.43
 -12  -1  -3  146.80    4.71
 -12   1  -3  148.03    4.75
  -6 -11  -3    8.18    0.58
  -6  11  -3    7.19    0.39
  -6  11  -3    8.41    0.48
   6 -11   3    6.94    1.10
  -1  -9  -7    3.24    0.43
  -1   9  -7    2.78    0.41
   1  -9   7    0.95    1.18
  -1  -9  -7    2.34    0.46
  -1   9  -7    2.42    0.39
  -6   7   7   10.47    0.41
   6  -7  -7    9.62    0.57
  -5  12  -2    0.65    0.25
  -5  12  -2    0.56    0.28
  -5 -12  -2    0.59    0.43
  -3 -13   1   21.43    0.97
  -3  13   1   21.61    0.90
   7 -11  -2   58.72    3.46
   7 -11  -2   64.75    2.53
  -7  11   2   66.86    2.26
  -7   6   7   10.58    0.44
   7  -6  -7    8.85    0.93
  11  -7   0    4.31    2.57
  11  -7   0    3.48    0.97
 -10  -4  -5   30.68    1.20
 -10   4  -5   31.02    1.23
 -10  -4  -5   28.60    1.12
  10  -4   5   26.14    1.83
 -10   4  -5   30.42    1.16
  -4 -12  -3    1.93    0.48
  -4  12  -3    1.35    0.31
  -4  12  -3    1.38    0.30
   4 -12   3    1.31    0.78
  -2 -13   2   14.99    0.94
   2  -9  -7  116.11    4.02
   2   9  -7  114.64    4.00
  -2  -9   7  109.43    4.49
   2  -9  -7  113.28    3.77
  -2  12  -4   56.06    1.98
  -2  12  -4   49.20    2.00
   2 -12   4   50.37    2.29
  -2 -12  -4   55.32    2.05
  -3  13  -1  115.35    3.81
  -3 -13  -1  114.16    3.93
   3 -13   1  120.44    4.28
  -9   7   5    8.52    0.40
 -11  -7   1   59.86    2.14
  11  -7  -1   54.83    4.30
 -11   7   1   48.02    1.69
  11  -7  -1   54.48    2.59
  -6   3  -8   11.07    0.47
  -6  -3  -8   12.53    0.57
  -6   3  -8   12.46    0.50
  -6   3  -8   11.39    0.56
  -6  -3  -8   12.92    0.55
 -11  -6   3   54.50    2.00
 -11   6   3   52.58    1.83
 -10   6  -4    1.84    0.30
 -10  -6  -4    1.81    0.33
  10  -6   4    0.92    1.12
  10  -6   4    1.20    1.13
 -10  -6  -4    2.30    0.31
 -10   6  -4    2.48    0.36
   7 -10  -4   27.17    1.31
   7 -10  -4   25.92    1.98
  -7  10   4   26.48    1.01
 -12  -5   0    0.46    0.25
 -12   5   0    0.54    0.26
  12  -5   0    1.06    1.67
   9  -2  -7    2.35    1.15
  -9   2   7    1.38    0.32
   9   2  -7    1.11    1.34
  -9  -2   7    1.06    0.29
  -7  -5  -7   83.88    2.83
  -7   5  -7   91.30    3.10
  -7   5  -7   86.88    2.90
   2 -13   2    4.70    0.80
  -2  13  -2    7.01    0.42
  -2 -13  -2    7.66    0.63
  10  -3  -6    9.36    1.63
 -10   3   6   10.65    0.49
 -10  -3   6   10.06    0.55
 -12   5   1    6.51    0.36
 -12  -5   1    7.28    0.45
  12   5  -1    6.64    0.94
   4  -8   7   64.16    3.19
  -4   8  -7   67.25    2.31
  -4  -8  -7   64.12    2.21
  -4   8  -7   64.38    2.30
  -4  -8  -7   62.12    2.21
  -4   8  -7   61.92    2.16
  -3  11  -5    6.93    0.46
  -3 -11  -5    7.36    0.57
   3 -11   5    6.54    1.07
  -3  11  -5    7.81    0.46
  -3 -11  -5    5.82    0.48
  -9   4  -6   14.40    0.58
   9  -4   6   13.96    1.33
  -9  -4  -6   13.39    0.51
  -9   4  -6   15.92    0.53
  -5 -11  -4   68.72    2.42
   5 -11   4   67.97    3.01
  -5  11  -4   71.19    2.42
  -5  11  -4   68.58    2.40
  12   0  -4   35.43    3.41
 -12   0   4   37.93    1.42
  -2  -7  -8    6.09    0.48
  -2   7  -8    5.94    0.43
  -2  -7  -8    6.07    0.43
   2  -7   8    5.82    1.32
  -2   7  -8    6.27    0.46
   7  -3  -8    4.07    0.76
  -7   3   8    5.62    0.45
   5   0  -9    0.62    0.56
   5   0  -9   -0.77    0.56
  -4   0  -9    0.35    0.32
  -4   0  -9    0.44    0.32
   4   3  -9   13.13    0.90
   4  -3  -9   11.54    0.49
  -4   3   9   11.42    0.52
   4  -3  -9   12.30    0.80
   4   3  -9   12.77    0.76
  -8  -3  -7   26.53    1.07
  -8   3  -7   28.51    1.19
  -8   3  -7   27.09    1.06
  -8  -3  -7   25.75    1.07
 -11   5   4   11.68    0.47
 -11  -5   4   11.43    0.58
  11  -5  -4   12.65    2.50
   3  -7  -8    2.41    0.53
   3  -7  -8    3.62    0.41
   3   7  -8    2.18    0.53
 -12   2  -3  100.58    3.30
  12  -2   3   75.86    3.40
  -8  -6  -6    2.64    0.33
  -8   6  -6    2.55    0.30
   8  -6   6    3.32    1.23
  -3   3  -9   33.59    1.31
  -3  -3  -9   35.44    1.39
  -3  -3  -9   32.45    1.36
  -3   3  -9   32.64    1.27
  -3   3  -9   33.20    1.37
  -6  12   0   10.29    0.44
  -6 -12   0    8.47    0.62
   6 -12   0    9.14    2.45
   6 -12   0    9.92    0.90
 -10   8  -2   31.96    1.20
  10  -8   2   22.96    2.70
 -10   8  -2   34.64    1.36
  10  -8   2   32.81    2.06
   3  -4  -9   33.27    1.62
   3  -4  -9   34.73    1.34
   3  -4  -9   37.04    1.57
   3   4  -9   38.87    1.72
  -5  -9  -6   53.36    1.94
  -5   9  -6   54.40    1.90
   5  -9   6   51.54    2.78
  -5  -9  -6   52.96    1.88
  -5   9  -6   50.23    1.84
 -11   3   5   37.31    1.39
  11  -3  -5   41.76    3.29
  11   3  -5   30.72    2.95
 -11  -3   5   35.53    1.41
 -12  -1   4   -0.03    0.27
  12  -1  -4   -1.48    2.30
  12   1  -4    1.45    2.01
  -3 -10  -6   33.60    1.39
  -3  10  -6   29.25    1.15
   3 -10   6   31.39    2.05
  -3 -10  -6   26.02    1.08
  -3  10  -6   31.59    1.31
  -2   4  -9    9.84    0.52
  -2   4  -9   10.24    0.62
  -2  -4  -9   11.29    0.55
  -2   4  -9   11.66    0.52
 -12   4  -2   24.04    0.95
  12  -4   2   21.85    1.97
  12  -4   2   24.26    1.71
   5   1  -9    4.09    0.59
   5  -1  -9    5.22    0.69
  -5   1   9    4.25    0.35
   5   1  -9    5.53    0.74
   7  -8  -6    1.49    0.45
   7  -8  -6    0.97    0.94
  -7   8   6    0.86    0.23
  -9   9   3   -0.01    0.22
   9  -9  -3   -0.05    0.53
   9  -9  -3   -2.74    1.89
 -13   0   0   17.28    0.58
  13   0   0   20.86    1.78
  -4   1  -9    3.70    0.40
  -4  -1  -9    3.83    0.42
  -4  -1  -9    3.81    0.43
  -4   1  -9    3.78    0.45
   7 -11   2    9.06    0.96
   7 -11   2    7.70    2.06
  -7  11  -2    8.36    0.43
  -7 -11  -2    7.16    0.58
  -7  11  -2    6.95    0.40
  11  -7   1  101.03    5.31
  11  -7   1  110.11    4.50
 -11   7  -1  110.65    3.61
   3 -12  -4    1.10    0.76
  -3 -12   4    0.26    0.65
   3 -12  -4    1.28    0.46
  -8   7   6   25.57    0.99
 -13   0   1   -0.33    0.26
  13   0  -1   -1.98    1.38
   5  -8  -7    6.22    0.93
   5   8  -7    4.13    0.68
   5  -8  -7    5.66    0.51
   5  -5   8   41.83    2.38
  -5  -5  -8   40.10    1.51
  -5   5  -8   40.70    1.50
  -5   5  -8   38.58    1.43
  -5   5  -8   29.71    1.24
  -6  12   1   91.02    3.01
   6 -12  -1   86.22    3.34
  -6 -12   1   89.22    3.18
   6 -12  -1   76.59    4.28
  -2  -9  -7    2.13    0.45
  -2   9  -7    1.22    0.36
  -2   9  -7    1.15    0.34
   2  -9   7    1.98    1.11
  -8  10   3  104.43    3.41
   8 -10  -3   92.79    4.49
   8 -10  -3  101.05    3.64
  -4   6  -8    7.59    0.43
  -4  -6  -8    7.43    0.45
  -4   6  -8    7.13    0.43
   4  -6   8    5.26    1.14
 -10   7   4    0.25    0.23
  10  -7  -4    2.67    1.82
 -10  -7   4    0.21    0.35
  13   1   0    0.23    1.17
  13  -1   0    1.67    1.51
 -13   1   0    0.78    0.28
 -13  -1   0    0.86    0.27
 -11   4  -4    0.69    0.24
  11  -4   4    1.78    0.98
 -11   4  -4    0.42    0.33
  11  -4   4   -0.18    0.98
   8  -5  -7   11.85    1.20
  -8   5   7   13.96    0.51
   6 -10  -5   58.13    2.21
   6 -10  -5   61.37    2.77
  12  -5   1   20.24    1.56
 -12   5  -1   20.98    0.55
  12  -5   1   25.41    2.38
 -13   1   1   39.94    1.45
  13  -1  -1   39.11    3.05
  13   1  -1   42.58    2.69
 -13  -1   1   39.03    1.44
  -6   5   8   19.45    0.60
   6   5  -8   17.01    1.02
   6  -5  -8   17.36    1.06
   5  -6  -8   18.27    1.02
   5  -6  -8   16.92    0.64
   5   6  -8   17.32    0.97
   3  -9  -7   15.51    0.94
   3   9  -7   16.59    0.90
   3  -9  -7   15.18    0.68
   4 -11  -5   46.00    2.14
   4  11  -5   32.47    1.57
   4 -11  -5   46.69    1.82
 -11   7   2   15.21    0.49
 -11  -7   2   15.74    0.65
  11  -7  -2   10.78    2.66
  -6  12  -1   41.50    1.50
  -6 -12  -1   39.84    1.61
   6 -12   1   41.85    1.99
   1  -5  -9    7.34    0.42
   1   5  -9    7.38    0.67
   1  -5  -9    5.48    0.57
   4 -10  -6   15.26    0.96
   4 -10  -6   17.08    0.70
   4  10  -6   16.15    0.95
  -3 -13   2    4.22    0.64
   3 -13  -2    2.42    0.60
   0   5  -9   82.11    2.93
   0  -5  -9   85.43    2.87
   0  -5  -9   81.17    2.83
  12   4  -3    1.31    0.98
  12  -4  -3    2.31    2.65
 -12  -4   3    1.79    0.35
 -12   4   3    2.62    0.31
   4 -13   0   42.01    1.85
  -4 -13   0   47.27    1.90
  -4  13   0   49.58    1.75
  -8   9  -4    1.51    0.31
  -8   9  -4    2.15    0.31
   8  -9   4    0.02    0.96
  -8  -9  -4    2.41    0.38
  -8  -9  -4    1.67    0.30
   8  -9   4    1.71    1.05
  12  -2  -4    1.87    2.34
  12   2  -4    1.31    2.10
 -12  -2   4    3.35    0.40
  -5   2   9    7.67    0.44
   5   2  -9    7.63    0.84
   5  -2  -9    9.20    0.82
   5   2  -9    8.37    0.72
  12   5  -2   -0.80    0.60
 -12   5   2    0.36    0.26
 -12  -5   2    0.40    0.34
   9  -3  -7    1.97    1.03
  -9   3   7    0.60    0.29
  -9  -3   7    0.57    0.31
  -4  -2  -9   43.16    1.66
  -4  -2  -9   44.08    1.64
  -4   2  -9   44.57    1.71
  -4   2  -9   45.28    1.66
   0  13  -3   49.44    1.81
   0 -13   3   51.24    2.23
   0 -13  -3   51.77    1.99
  10  -8  -3    4.61    0.69
 -10  -8   3    5.07    0.46
 -10   8   3    4.92    0.35
  10  -8  -3    1.70    1.85
   3 -12   4    4.90    1.00
  -3  12  -4    5.01    0.38
  -3  12  -4    5.90    0.46
  -3 -12  -4    6.42    0.54
   5 -12  -3    6.69    0.67
   5 -12  -3    6.67    1.30
  -5  12   3    6.97    0.36
   6  -9  -6    4.52    0.90
   6  -9  -6    2.13    0.45
  -7   0  -8   33.60    1.33
  -7   0  -8   31.39    1.22
 -13   0  -1    0.20    0.26
  13   0   1   -0.32    0.97
  -3  13  -2    4.71    0.35
   3 -13   2    4.35    0.78
  -3 -13  -2    6.08    0.61
  -1 -13   3    9.15    0.93
   1  13  -3    9.94    0.50
 -10   0  -6    7.64    0.47
 -13   2   0    0.57    0.28
  13  -2   0   -0.91    1.47
 -13  -2   0    1.02    0.27
  13   2   0    2.47    1.01
   4 -13  -1   15.86    0.82
  -4 -13   1   14.25    0.83
  -4  13   1   14.76    0.49
  12  -3   3   26.47    1.95
 -12   3  -3   25.51    0.99
   2  -5  -9   71.17    2.59
   2  -5  -9   70.87    2.41
  -9  10   0   -0.27    0.25
   9 -10   0   -1.06    2.25
   9 -10   0   -0.65    0.76
 -11   0  -5    0.20    0.31
   1  -5   9   13.66    1.34
  -1   5  -9   13.13    0.55
  -1   5  -9   12.58    0.68
 -13  -2   1    0.28    0.29
  13   2  -1    0.75    1.08
 -13   2   1   -0.25    0.25
  13  -2  -1    2.74    2.07
  -8   8  -5   13.29    0.57
  -8  -8  -5   12.52    0.51
   8  -8   5   13.73    1.34
  -8  -8  -5   13.01    0.56
  -8   8  -5   12.87    0.51
   8  -8   5   13.69    1.56
 -10  -6   5   35.27    1.38
 -10   6   5   38.44    1.40
  10  -6  -5   39.23    2.74
  -6   4  -8   51.90    1.84
  -6  -4  -8   51.64    1.85
  -6   4  -8   53.59    1.96
  -6   4  -8   54.49    1.92
   6  -4   8   59.13    2.93
   1 -13   3    2.04    0.74
  -1 -13  -3    1.28    0.51
  -1  13  -3    1.83    0.33
  -7   9  -5   72.13    2.51
  -7  -9  -5   62.42    2.22
  -7  -9  -5   69.24    2.41
  -7   9  -5   66.75    2.27
   9  -8   4   27.60    2.02
  -9  -8  -4   27.72    1.10
  -9   8  -4   30.02    1.18
   9  -8   4   30.55    2.10
  -9  -8  -4   29.89    1.17
  -9   8  -4   28.78    1.11
  -7   1  -8    1.24    0.35
  -7   1  -8    0.63    0.30
  -7  -1  -8    0.30    0.28
  -7  -1  -8    0.62    0.33
 -13  -1  -1    2.03    0.29
 -13   1  -1    2.29    0.31
  13   1   1    2.80    1.09
  13  -1   1    1.36    1.19
  -7  10  -4   40.20    1.52
  -7 -10  -4   43.43    1.61
   7 -10   4   41.41    2.24
 -13   0   2  123.25    4.02
  13   0  -2  131.54    6.03
 -10   1  -6    0.92    0.33
 -10  -1  -6    1.80    0.34
  -4  13  -1    4.29    0.34
  -4 -13  -1    4.57    0.55
   8   0  -8    2.29    0.91
  -8   0   8    2.65    0.35
  10  -4  -6    1.00    1.48
 -10  -4   6    0.89    0.33
 -10   4   6    0.71    0.29
  -3   7  -8    4.31    0.46
   3  -7   8    5.85    1.19
  -3   7  -8    3.85    0.39
  -3  -7  -8    4.54    0.44
  -3   7  -8    4.58    0.35
  -9   6   6    7.33    0.38
   9  -6  -6    5.32    1.35
   6 -11  -4   12.83    1.39
  -6  11   4   12.55    0.44
   6 -11  -4   12.25    0.75
   9 -10  -1   10.02    0.87
  -9  10   1   10.60    0.43
   9 -10  -1    7.63    2.59
 -11  -1  -5   37.51    1.44
 -11   1  -5   34.39    1.28
 -11   1  -5   38.35    1.46
  -7   4   8    0.62    0.29
   7  -4  -8   -0.32    0.67
  -7  11   3    0.83    0.22
   7 -11  -3    0.23    1.44
   7 -11  -3    0.61    0.57
 -13   1   2    1.21    0.27
  13  -1  -2    1.86    1.92
 -13  -1   2    1.43    0.31
  13   1  -2    0.87    1.61
  -6  12   2    1.26    0.25
   6 -12  -2    0.55    1.27
   6 -12  -2    0.38    0.56
  11  -6   3    3.82    1.39
 -11   6  -3    2.02    0.39
 -11   6  -3    1.66    0.30
 -11  -6  -3    1.50    0.30
  11  -6   3    1.17    0.98
   4   7  -8   36.72    1.70
   4  -7  -8   39.40    1.50
  10  -5   5   17.49    1.51
 -10  -5  -5   18.52    0.59
  10  -5   5   18.04    1.33
 -10   5  -5   17.57    0.55
  10  -9   0    1.50    0.80
 -10   9   0    1.75    0.27
  10  -9   0    0.15    2.37
  -8  -1   8    5.01    0.40
   8  -1  -8    5.66    1.01
  -8   1   8    5.98    0.44
   8   1  -8    7.17    1.15
   4  -4  -9   -0.16    0.54
   4  -4  -9   -0.27    0.29
   4   4  -9    0.79    0.63
   8  -4   7   50.75    2.69
  -8   4  -7   50.94    1.79
  -8   4  -7   53.76    1.96
  -8  -4  -7   48.23    1.73
  -3   4  -9    4.49    0.37
  -3   4  -9    3.68    0.46
  -3   4  -9    4.21    0.40
;

_shelx_hkl_checksum   90627

#==============================================================================
#     End of CIF
#==============================================================================
