# Supplementary material for: Solid State Structure and Hydrogen Bonding of Some Cyclic NH Carboximides
Source: MDPI journal article supplement (doi:10.3390/cryst13010150), 2023-01-15
Supplement: s1 [file s1 › 7.cif]

data_7
_audit_creation_date                               2020-11-03
_audit_creation_method                            'by CrystalStructure 4.3'

_publ_section_references
;
    ENTER OTHER REFERENCES

    Rigaku (2018). CrystalStructure. Version 4.3. 
    Rigaku Corporation, Tokyo, Japan.

    Sheldrick, G. M. (2014). Acta Cryst. (2014). A70, C1437.
    SHELXT Version 2018/2

    Sheldrick, G.M. (2008) SHELXL Version 2018/3, Acta Cryst. A64, 112-122.

    Rigaku (1998). REQAB. 
    Rigaku Corporation, Tokyo, Japan.

;


_chemical_formula_sum                             'C8 H7 N O3'
_chemical_formula_moiety                          'C8 H7 N O3'
_chemical_formula_weight                           165.15
_chemical_melting_point                            ?
_chemical_absolute_configuration
                                                 'unk'

#==============================================================================
# CRYSTAL DATA
_space_group_crystal_system                        orthorhombic
_space_group_name_H-M_alt                         'P 21 21 21'
_space_group_name_Hall                            'P 2ac 2ab'
_space_group_IT_number                             19
loop_
_space_group_symop_id
_space_group_symop_operation_xyz
1   '+X,+Y,+Z'
2   '1/2-X,-Y,1/2+Z'
3   '1/2+X,1/2-Y,-Z'
4   '-X,1/2+Y,1/2-Z'
#------------------------------------------------------------------------------
_cell_length_a                                     7.0068(7)
_cell_length_b                                     8.1073(8)
_cell_length_c                                     12.7199(13)
_cell_angle_alpha                                  90.0000
_cell_angle_beta                                   90.0000
_cell_angle_gamma                                  90.0000
_cell_volume                                       722.57(13)
_cell_formula_units_Z                              4
_cell_measurement_reflns_used                      2483
_cell_measurement_theta_min                        3.20
_cell_measurement_theta_max                        27.50
_cell_measurement_temperature                      173
#------------------------------------------------------------------------------
_exptl_crystal_description                         prism
_exptl_crystal_colour                              colorless
_exptl_crystal_size_max                            0.150
_exptl_crystal_size_mid                            0.150
_exptl_crystal_size_min                            0.080
_exptl_crystal_density_diffrn                      1.518
_exptl_crystal_density_meas                        ?
_exptl_crystal_density_method                     'not measured'
_exptl_crystal_F_000                               344.00
_exptl_absorpt_coefficient_mu                      0.118
_exptl_absorpt_correction_type                     multi-scan
_exptl_absorpt_process_details                    'REQAB (Rigaku, 1998)'
_exptl_absorpt_correction_T_min                    0.869
_exptl_absorpt_correction_T_max                    0.991

#==============================================================================
# EXPERIMENTAL DATA

_diffrn_ambient_temperature                        173
_diffrn_radiation_type                            'Mo K\a'
_diffrn_radiation_wavelength                       0.71075
_diffrn_measurement_device_type                   'Rigaku XtaLAB P200'
_diffrn_measurement_method                         \w
_diffrn_detector_area_resol_mean                   5.814
_diffrn_reflns_number                              8213
_diffrn_reflns_av_unetI/netI                       0.0168
_diffrn_reflns_av_R_equivalents                    0.0295
_diffrn_reflns_theta_max                           25.375
_diffrn_reflns_theta_min                           2.980
_diffrn_reflns_theta_full                          25.242
_diffrn_measured_fraction_theta_max                0.990
_diffrn_measured_fraction_theta_full               0.990
_diffrn_reflns_Laue_measured_fraction_max          0.990
_diffrn_reflns_Laue_measured_fraction_full         0.990
_diffrn_reflns_point_group_measured_fraction_max   0.990
_diffrn_reflns_point_group_measured_fraction_full  0.990
_diffrn_reflns_limit_h_min                        -8
_diffrn_reflns_limit_h_max                         7
_diffrn_reflns_limit_k_min                        -9
_diffrn_reflns_limit_k_max                         9
_diffrn_reflns_limit_l_min                        -15
_diffrn_reflns_limit_l_max                         14
_diffrn_standards_number                           0
_diffrn_standards_interval_count                   .
_diffrn_standards_decay_%                          ?
_reflns_number_total                               1307
_reflns_number_gt                                  1296
_reflns_threshold_expression                       F^2^>2.0\s(F^2^)
_reflns_Friedel_coverage          0.665
_reflns_Friedel_fraction_max      0.991
_reflns_Friedel_fraction_full     0.990

#==============================================================================
# REFINEMENT DATA

_refine_special_details
;
    Refinement was performed using all reflections. The weighted 
    R-factor (wR) and goodness of fit (S) are based on F^2^.
    R-factor (gt) are based on F. The threshold expression of
    F^2^ > 2.0 sigma(F^2^) is used only for calculating R-factor (gt).
;
_refine_ls_structure_factor_coef                   Fsqd
_refine_ls_R_factor_all                            0.0269
_refine_ls_R_factor_gt                             0.0267
_refine_ls_wR_factor_ref                           0.0818
_refine_ls_wR_factor_gt                            0.0815
_refine_ls_number_restraints                       1
_refine_ls_hydrogen_treatment                      mixed
_refine_ls_number_reflns                           1307
_refine_ls_number_parameters                       113
_refine_ls_goodness_of_fit_ref                     1.022
_refine_ls_weighting_scheme                        calc
_refine_ls_weighting_details
           'w = 1/[\s^2^(Fo^2^)+(0.0643P)^2^+0.0724P] where P=(Fo^2^+2Fc^2^)/3'
_atom_sites_solution_hydrogens                     geom
_atom_sites_solution_primary                       direct
_atom_sites_solution_secondary                     difmap
_refine_ls_shift/su_max                            0.000
_refine_diff_density_max                           0.15
_refine_diff_density_min                          -0.18
_refine_ls_extinction_method                       none
_refine_ls_extinction_coef                         ?
_refine_ls_abs_structure_details
;
 Flack x determined using 512 quotients [(I+)-(I-)]/[(I+)+(I-)]
 (Parsons, Flack and Wagner, Acta Cryst. B69 (2013) 249-259).
;
_refine_ls_abs_structure_Flack                     0.2(3)

loop_
_atom_type_symbol
_atom_type_description
_atom_type_scat_dispersion_real
_atom_type_scat_dispersion_imag
_atom_type_scat_source
  'C' 'C'  0.0033 0.0016 
;
International Tables for Crystallography
(Vol. C, Tables 4.2.6.8 and 6.1.1.4)
;
  'H' 'H'  0.0000 0.0000 
;
International Tables for Crystallography
(Vol. C, Table 6.1.1.4)
;
  'N' 'N'  0.0061 0.0033 
;
International Tables for Crystallography
(Vol. C, Tables 4.2.6.8 and 6.1.1.4)
;
  'O' 'O'  0.0106 0.0060 
;
International Tables for Crystallography
(Vol. C, Tables 4.2.6.8 and 6.1.1.4)
;

#==============================================================================
# ATOMIC COORDINATES AND THERMAL PARAMETERS

loop_
 _atom_site_label
 _atom_site_type_symbol
 _atom_site_fract_x
 _atom_site_fract_y
 _atom_site_fract_z
 _atom_site_U_iso_or_equiv
 _atom_site_adp_type
 _atom_site_occupancy
 _atom_site_site_symmetry_order  
 _atom_site_calc_flag
 _atom_site_refinement_flags_posn
 _atom_site_refinement_flags_adp
 _atom_site_refinement_flags_occupancy
 _atom_site_disorder_assembly
 _atom_site_disorder_group
O1 O 0.49452(19) 0.39445(17) 0.52111(9) 0.0357(4) Uani 1 1 d . . . . .
O2 O 0.52230(19) 0.59781(18) 0.18796(9) 0.0351(3) Uani 1 1 d . . . . .
O4 O -0.04370(17) 0.53844(18) 0.35323(10) 0.0321(4) Uani 1 1 d . . . . .
N1 N 0.5491(2) 0.49640(17) 0.35527(11) 0.0244(4) Uani 1 1 d D . . . .
C2 C 0.4516(2) 0.53273(19) 0.26464(13) 0.0228(4) Uani 1 1 d . . . . .
C3 C 0.2469(2) 0.4779(2) 0.27896(13) 0.0229(4) Uani 1 1 d . . . . .
H3 H 0.210126 0.393395 0.225379 0.027 Uiso 1 1 calc R U . . .
C4 C 0.0945(2) 0.6192(3) 0.28583(13) 0.0293(4) Uani 1 1 d . . . . .
H4 H 0.044045 0.659269 0.216869 0.035 Uiso 1 1 calc R U . . .
C5 C 0.1713(3) 0.7514(2) 0.35812(14) 0.0324(4) Uani 1 1 d . . . . .
H5 H 0.215674 0.857858 0.338734 0.039 Uiso 1 1 calc R U . . .
C6 C 0.1640(3) 0.6884(2) 0.45386(14) 0.0300(4) Uani 1 1 d . . . . .
H6 H 0.202533 0.740469 0.517306 0.036 Uiso 1 1 calc R U . . .
C7 C 0.0822(2) 0.5170(2) 0.44228(13) 0.0260(4) Uani 1 1 d . . . . .
H7 H 0.021340 0.470486 0.506900 0.031 Uiso 1 1 calc R U . . .
C8 C 0.2385(2) 0.40660(19) 0.39069(12) 0.0218(4) Uani 1 1 d . . . . .
H8 H 0.199654 0.287926 0.390022 0.026 Uiso 1 1 calc R U . . .
C9 C 0.4380(2) 0.42785(19) 0.43382(13) 0.0229(4) Uani 1 1 d . . . . .
H1 H 0.6869(11) 0.508(3) 0.3633(17) 0.038(6) Uiso 1 1 d D . . . .

loop_
 _atom_site_aniso_label
 _atom_site_aniso_U_11
 _atom_site_aniso_U_22
 _atom_site_aniso_U_33
 _atom_site_aniso_U_23
 _atom_site_aniso_U_13
 _atom_site_aniso_U_12
O1 0.0370(7) 0.0408(7) 0.0294(6) 0.0068(5) -0.0085(5) 0.0119(6)
O2 0.0314(7) 0.0426(7) 0.0311(7) 0.0068(5) 0.0119(5) -0.0029(6)
O4 0.0121(6) 0.0500(8) 0.0341(7) 0.0031(5) -0.0002(4) -0.0017(6)
N1 0.0130(7) 0.0287(7) 0.0313(8) -0.0019(6) 0.0002(5) -0.0001(5)
C2 0.0202(8) 0.0227(7) 0.0255(8) -0.0031(6) 0.0041(6) 0.0012(7)
C3 0.0169(8) 0.0293(8) 0.0224(9) -0.0022(6) -0.0011(6) -0.0021(7)
C4 0.0182(8) 0.0437(10) 0.0260(8) 0.0090(7) 0.0009(6) 0.0071(8)
C5 0.0241(8) 0.0252(8) 0.0481(10) 0.0052(8) 0.0074(8) 0.0072(7)
C6 0.0237(8) 0.0325(9) 0.0338(9) -0.0085(7) 0.0020(8) 0.0078(7)
C7 0.0176(7) 0.0360(9) 0.0243(8) 0.0036(7) 0.0034(7) 0.0030(7)
C8 0.0180(8) 0.0214(7) 0.0260(8) 0.0017(7) 0.0022(6) -0.0020(6)
C9 0.0216(8) 0.0203(7) 0.0268(8) 0.0006(6) -0.0007(6) 0.0056(6)

#==============================================================================
_computing_data_collection
                                'CrystalClear-SM Expert 2.1 b45 (Rigaku, 2015)'
_computing_cell_refinement
                                               'CrystalClear-SM Expert 2.1 b45'
_computing_data_reduction
                                               'CrystalClear-SM Expert 2.1 b45'
_computing_structure_solution
                                      'SHELXT Version 2018/2 (Sheldrick, 2014)'
_computing_structure_refinement
                                      'SHELXL Version 2018/3 (Sheldrick, 2008)'
_computing_publication_material
                                          'CrystalStructure 4.3 (Rigaku, 2018)'
_computing_molecular_graphics                     'CrystalStructure 4.3'

#==============================================================================
# MOLECULAR GEOMETRY

_geom_special_details
;
 All esds (except the esd in the dihedral angle between two l.s. planes)
 are estimated using the full covariance matrix.  The cell esds are taken
 into account individually in the estimation of esds in distances, angles
 and torsion angles; correlations between esds in cell parameters are only
 used when they are defined by crystal symmetry.  An approximate (isotropic)
 treatment of cell esds is used for estimating esds involving l.s. planes.
;

loop_
 _geom_bond_atom_site_label_1
 _geom_bond_atom_site_label_2
 _geom_bond_distance
 _geom_bond_site_symmetry_2
 _geom_bond_publ_flag
O1 C9 1.210(2) . ?
O2 C2 1.214(2) . ?
O4 C7 1.446(2) . ?
O4 C4 1.450(2) . ?
N1 C2 1.372(2) . ?
N1 C9 1.383(2) . ?
N1 H1 0.975(7) . ?
C2 C3 1.513(2) . ?
C3 C8 1.535(2) . ?
C3 C4 1.568(2) . ?
C3 H3 1.0000 . ?
C4 C5 1.511(3) . ?
C4 H4 1.0000 . ?
C5 C6 1.322(3) . ?
C5 H5 0.9500 . ?
C6 C7 1.510(2) . ?
C6 H6 0.9500 . ?
C7 C8 1.559(2) . ?
C7 H7 1.0000 . ?
C8 C9 1.511(2) . ?
C8 H8 1.0000 . ?

loop_
 _geom_angle_atom_site_label_1
 _geom_angle_atom_site_label_2
 _geom_angle_atom_site_label_3
 _geom_angle
 _geom_angle_site_symmetry_1
 _geom_angle_site_symmetry_3
 _geom_angle_publ_flag
C7 O4 C4 96.31(12) . . ?
C2 N1 C9 114.39(15) . . ?
C2 N1 H1 124.1(13) . . ?
C9 N1 H1 121.3(13) . . ?
O2 C2 N1 124.40(16) . . ?
O2 C2 C3 127.67(16) . . ?
N1 C2 C3 107.93(14) . . ?
C2 C3 C8 104.96(12) . . ?
C2 C3 C4 115.94(14) . . ?
C8 C3 C4 101.40(12) . . ?
C2 C3 H3 111.3 . . ?
C8 C3 H3 111.3 . . ?
C4 C3 H3 111.3 . . ?
O4 C4 C5 101.43(14) . . ?
O4 C4 C3 99.08(14) . . ?
C5 C4 C3 108.04(14) . . ?
O4 C4 H4 115.4 . . ?
C5 C4 H4 115.4 . . ?
C3 C4 H4 115.4 . . ?
C6 C5 C4 105.83(15) . . ?
C6 C5 H5 127.1 . . ?
C4 C5 H5 127.1 . . ?
C5 C6 C7 106.28(15) . . ?
C5 C6 H6 126.9 . . ?
C7 C6 H6 126.9 . . ?
O4 C7 C6 101.40(13) . . ?
O4 C7 C8 99.66(13) . . ?
C6 C7 C8 107.62(12) . . ?
O4 C7 H7 115.4 . . ?
C6 C7 H7 115.4 . . ?
C8 C7 H7 115.4 . . ?
C9 C8 C3 104.95(12) . . ?
C9 C8 C7 115.55(13) . . ?
C3 C8 C7 101.54(12) . . ?
C9 C8 H8 111.4 . . ?
C3 C8 H8 111.4 . . ?
C7 C8 H8 111.4 . . ?
O1 C9 N1 124.67(16) . . ?
O1 C9 C8 127.62(16) . . ?
N1 C9 C8 107.71(13) . . ?

loop_
 _geom_torsion_atom_site_label_1
 _geom_torsion_atom_site_label_2
 _geom_torsion_atom_site_label_3
 _geom_torsion_atom_site_label_4
 _geom_torsion
 _geom_torsion_site_symmetry_1
 _geom_torsion_site_symmetry_2
 _geom_torsion_site_symmetry_3
 _geom_torsion_site_symmetry_4
 _geom_torsion_publ_flag
C9 N1 C2 O2 177.74(14) . . . . ?
C9 N1 C2 C3 -2.17(19) . . . . ?
O2 C2 C3 C8 -179.31(15) . . . . ?
N1 C2 C3 C8 0.60(16) . . . . ?
O2 C2 C3 C4 -68.4(2) . . . . ?
N1 C2 C3 C4 111.54(15) . . . . ?
C7 O4 C4 C5 -49.68(16) . . . . ?
C7 O4 C4 C3 60.95(15) . . . . ?
C2 C3 C4 O4 -149.92(14) . . . . ?
C8 C3 C4 O4 -36.91(15) . . . . ?
C2 C3 C4 C5 -44.66(19) . . . . ?
C8 C3 C4 C5 68.35(16) . . . . ?
O4 C4 C5 C6 32.03(17) . . . . ?
C3 C4 C5 C6 -71.57(18) . . . . ?
C4 C5 C6 C7 -0.19(17) . . . . ?
C4 O4 C7 C6 49.48(15) . . . . ?
C4 O4 C7 C8 -60.85(15) . . . . ?
C5 C6 C7 O4 -31.78(16) . . . . ?
C5 C6 C7 C8 72.32(16) . . . . ?
C2 C3 C8 C9 0.95(15) . . . . ?
C4 C3 C8 C9 -120.10(14) . . . . ?
C2 C3 C8 C7 121.62(14) . . . . ?
C4 C3 C8 C7 0.58(14) . . . . ?
O4 C7 C8 C9 149.01(14) . . . . ?
C6 C7 C8 C9 43.68(18) . . . . ?
O4 C7 C8 C3 36.09(14) . . . . ?
C6 C7 C8 C3 -69.24(15) . . . . ?
C2 N1 C9 O1 -176.30(15) . . . . ?
C2 N1 C9 C8 2.81(18) . . . . ?
C3 C8 C9 O1 176.89(16) . . . . ?
C7 C8 C9 O1 66.0(2) . . . . ?
C3 C8 C9 N1 -2.19(16) . . . . ?
C7 C8 C9 N1 -113.12(14) . . . . ?

loop_
_geom_hbond_atom_site_label_D
_geom_hbond_atom_site_label_H
_geom_hbond_atom_site_label_A
_geom_hbond_site_symmetry_D
_geom_hbond_site_symmetry_H
_geom_hbond_site_symmetry_A
_geom_hbond_distance_DA
_geom_hbond_distance_DH
_geom_hbond_distance_HA
_geom_hbond_angle_DHA
_geom_hbond_publ_flag
N1 H1 O4 . . 1_655 2.8735(19) 0.975(8) 1.909(8) 170.0(19) no

#==============================================================================
# Additional structures and associated data_? identifiers
# should be added at this point if there is more than one 
# structure analysis in the CIF.

_shelx_res_file
;
TITL DSAA24
    shelxl.res
    created by SHELXL-2018/3 at 17:30:41 on 03-Nov-2020
CELL  0.71075 7.00680 8.10730 12.71990 90.00000 90.00000 90.00000
ZERR  4 0.00070 0.00080 0.00130 0.00000 0.00000 0.00000
LATT -1
SYMM .50-X,    -Y, .50+Z
SYMM .50+X, .50-Y,    -Z
SYMM    -X, .50+Y, .50-Z
SFAC C H N O
UNIT 32 28 4 12
OMIT     4   0   0
OMIT     0   2   0
L.S. 20
FMAP 2
PLAN 5
WPDB -2
HTAB
BOND $H
CONF
LIST 4
TEMP -100.0
ACTA
SIZE 0.080 0.150 0.150
DFIX 0.9800 0.0050 N1 H1
WGHT    0.064300    0.072400
FVAR       1.18674
O1    4    0.494517    0.394448    0.521108    11.00000    0.03696    0.04077 =
         0.02938    0.00675   -0.00854    0.01186
O2    4    0.522303    0.597809    0.187961    11.00000    0.03143    0.04263 =
         0.03111    0.00682    0.01190   -0.00291
O4    4   -0.043700    0.538443    0.353233    11.00000    0.01212    0.04996 =
         0.03412    0.00308   -0.00022   -0.00169
N1    3    0.549109    0.496402    0.355274    11.00000    0.01299    0.02874 =
         0.03135   -0.00188    0.00016   -0.00008
C2    1    0.451614    0.532726    0.264638    11.00000    0.02021    0.02267 =
         0.02546   -0.00305    0.00406    0.00122
C3    1    0.246852    0.477891    0.278960    11.00000    0.01692    0.02925 =
         0.02241   -0.00219   -0.00115   -0.00207
AFIX  13
H3    2    0.210126    0.393395    0.225379    11.00000   -1.20000
AFIX   0
C4    1    0.094520    0.619195    0.285826    11.00000    0.01817    0.04372 =
         0.02596    0.00897    0.00089    0.00711
AFIX  13
H4    2    0.044045    0.659269    0.216869    11.00000   -1.20000
AFIX   0
C5    1    0.171302    0.751390    0.358115    11.00000    0.02406    0.02521 =
         0.04808    0.00518    0.00738    0.00717
AFIX  43
H5    2    0.215674    0.857858    0.338734    11.00000   -1.20000
AFIX   0
C6    1    0.164007    0.688366    0.453865    11.00000    0.02366    0.03246 =
         0.03384   -0.00849    0.00204    0.00783
AFIX  43
H6    2    0.202533    0.740469    0.517306    11.00000   -1.20000
AFIX   0
C7    1    0.082217    0.517031    0.442279    11.00000    0.01759    0.03601 =
         0.02434    0.00355    0.00345    0.00304
AFIX  13
H7    2    0.021340    0.470486    0.506900    11.00000   -1.20000
AFIX   0
C8    1    0.238528    0.406604    0.390690    11.00000    0.01803    0.02137 =
         0.02601    0.00171    0.00217   -0.00202
AFIX  13
H8    2    0.199654    0.287926    0.390022    11.00000   -1.20000
AFIX   0
C9    1    0.438009    0.427855    0.433817    11.00000    0.02159    0.02035 =
         0.02677    0.00065   -0.00073    0.00562
H1    2    0.686863    0.507765    0.363283    11.00000    0.03802
HKLF 4


REM  DSAA24
REM wR2 = 0.0818, GooF = S = 1.022, Restrained GooF = 1.022 for all data
REM R1 = 0.0267 for 1296 Fo > 4sig(Fo) and 0.0269 for all 1307 data
REM 113 parameters refined using 1 restraints

END

WGHT      0.0458      0.1139

REM Instructions for potential hydrogen bonds
EQIV $1 -x+1/2, -y+1, z-1/2
HTAB C4 O1_$1
EQIV $2 -x+1/2, -y+1, z+1/2
HTAB C7 O2_$2
EQIV $3 x-1/2, -y+1/2, -z+1
HTAB C8 O1_$3
EQIV $4 x+1, y, z
HTAB N1 O4_$4

REM Highest difference peak  0.154,  deepest hole -0.178,  1-sigma level  0.041
Q1    1   0.1858  0.5580  0.2759  11.00000  0.05    0.15
Q2    1   0.3354  0.4974  0.2670  11.00000  0.05    0.14
Q3    1   0.0065  0.5879  0.2179  11.00000  0.05    0.13
Q4    1   0.3315  0.9898  0.3250  11.00000  0.05    0.13
Q5    1   0.3311  0.4230  0.4145  11.00000  0.05    0.12
;

_shelx_res_checksum   35403

_shelx_hkl_file
;
   0   0  -1   -0.02    0.17
   0  -1   0   -0.01    0.29
   0  -1   0    0.20    0.24
   0   1   0   -0.00    0.24
   0  -1   0    0.00    0.23
   0   1   0    0.04    0.19
   0   1   0   -0.02    0.24
   1   0   0    0.11    0.26
  -1   0   0   -0.04    0.24
   0  -1   1    1.78    0.35
   0   1   1    0.26    0.19
   0   1  -1    0.60    0.28
   0  -1   1    0.43    0.45
   0  -1  -1    0.49    0.22
   0   1  -1    0.14    0.44
   0  -1   1    0.47    0.21
   0   1  -1    0.75    0.21
   0  -1  -1    1.41    0.44
   0   0  -2  555.92   16.55
   0   0   2  482.22   14.15
   0   0  -2  478.02   14.04
   0   0  -2  506.37   14.90
  -1   0  -1   73.10    2.35
  -1   0   1   82.91    3.02
   1   0  -1   97.99    3.45
  -1   0  -1   78.57    3.10
  -1   0   1   74.51    2.50
   1   0  -1   88.80    3.25
  -1   0  -1   76.56    2.59
  -1   0   1   94.10    3.29
   1   0   1   69.85    2.25
   1   0  -1   76.14    2.55
   1  -1   0 3517.24  101.39
  -1  -1   0 4169.48  120.86
  -1  -1   0 3951.10  114.70
  -1   1   0 3772.55  110.44
   1   1   0 3908.18  112.99
   1  -1   0 3879.52  111.58
  -1   1   0 3849.14  115.81
  -1  -1   0 4211.37  121.67
   0  -1   2 9329.38  268.09
   0  -1   2 9971.40  287.12
   0   1  -210496.06  383.24
   1   1  -1  173.22    5.57
  -1  -1   1  171.78    5.57
  -1   1  -1  163.01   45.41
  -1   1  -1  177.87    5.56
  -1  -1  -1  179.87    5.54
  -1  -1   1  181.41    5.78
   1  -1   1  171.75   54.86
   1  -1  -1  177.20    5.82
  -1   1  -1  180.12    5.49
  -1   1   1  180.59    5.49
  -1  -1   1  190.37    6.47
   1  -1  -1  178.70    5.44
  -1   0   2 4561.52  131.19
   1   0  -2 4690.49  135.89
  -1   0  -2 4639.11  134.13
   1   0   2 4325.77  124.36
  -1   0   2 4888.65  140.95
   1   0  -2 4602.53  132.83
   1   0  -2 4517.78  130.10
  -1   0  -2 4204.56  120.84
   0   0  -3    0.34    0.51
   0   0   3    0.28    0.25
   0   0  -3    0.10    0.29
   0   0  -3   -0.11    0.19
   1   1  -2 1536.86   44.71
   1  -1  -2 1561.80   51.61
  -1  -1   2 1659.59   49.77
  -1   1  -2 1656.50   47.81
   1  -1   2 1615.24   46.58
  -1  -1  -2 1626.33   47.17
  -1   1   2 1637.02   47.27
   1  -1   2 1574.10   45.50
  -1  -1   2 1697.85   49.21
  -1  -1  -2 1453.83   42.79
   1  -1  -2 1674.36   50.65
  -1   1  -2 1493.05   43.69
  -1   1  -2 1648.14   47.61
  -1  -1   2 1628.80   47.10
   1  -1  -2 1635.70   47.29
  -1   1   2 1671.18   48.84
   1   1  -2 1593.91   46.29
  -1  -1   2 1564.36   45.33
   0  -2   010479.16  385.89
   0   2   0 9385.87  269.90
   0  -2  -1 2143.69   62.18
   0  -2  -1 2171.03   62.69
   0  -2   1 2018.11   58.34
   0  -2   1 2061.27   59.66
   0   2   1 1904.62   55.22
   0   2   1 2102.94   60.75
   0   2  -1 2023.84   58.58
   0   2  -1 2106.29   61.09
   0  -2   1 2262.93   65.49
   0  -2  -1 2045.44   59.20
   0  -2  -1 2093.93   60.41
   0   2   1 1832.64   53.16
   0   1   3  236.79    7.12
   0   1  -3  277.03    8.30
   0  -1  -3  274.96    8.19
   0  -1  -3  273.08    8.15
   0   1   3  269.27    7.99
   0  -1   3  261.27    8.34
   0   1  -3  296.28    9.38
   0  -1   3  249.03    7.61
   1   0  -3 1384.90   40.11
  -1   0   3 1477.48   42.93
   1   0  -3 1405.21   41.03
   1   0  -3 1399.42   40.90
  -1   0  -3 1329.24   38.84
   1   0  -3 1363.33   39.83
  -1   0  -3 1427.44   41.23
  -1  -2   0 2207.01   64.01
  -1  -2   0 2372.64   68.78
  -1   2   0 2202.77   63.54
  -1  -2   0 2229.91   64.46
  -1   2   0 2277.03   65.67
  -1   2   0 2209.87   63.66
   1  -2   0 2078.83   59.97
  -1  -2   0 2073.90   60.87
   1  -2   0 2087.62   60.46
  -2   0   0 6925.55  199.08
   0  -2   2 1215.37   35.59
   0  -2  -2 1153.75   33.43
   0  -2  -2 1201.42   34.74
   0  -2  -2 1211.28   35.43
   0   2  -2 1171.76   34.35
   0  -2   2 1158.56   33.56
   0   2  -2 1211.90   35.31
  -1  -2  -1 1114.07   32.43
  -1  -2  -1 1085.42   32.02
  -1   2   1 1104.96   32.37
   1  -2   1 1088.97   31.50
  -1  -2  -1 1106.52   32.14
  -1   2  -1 1132.75   32.90
   1  -2  -1  922.47   26.90
  -1  -2   1 1074.68   32.04
   1   2   1  994.53   29.42
   1  -2  -1 1070.34   30.97
  -1  -2   1 1114.73   32.50
   1  -2  -1 1104.22   31.99
  -1   2   1 1098.27   31.84
  -1  -2   1 1156.57   33.79
   1   2  -1  970.26   30.55
  -1   2   1 1056.16   30.56
  -1   2  -1 1078.36   31.32
   2   0  -1 1465.28   51.18
  -2   0   1 1241.39   44.53
  -2   0   1 1172.85   34.05
  -2   0  -1 1198.22   34.76
  -2   0  -1 1222.05   35.49
   2   0   1 1171.58   33.98
   2   0  -1 1241.95   35.99
   2   0  -1 1059.10   31.01
   1  -1  -3 1558.12   45.40
   1   1  -3 1489.93   44.07
   1   1   3 1451.99   42.25
  -1   1  -3 1578.08   45.70
  -1  -1  -3 1486.78   43.04
  -1  -1   3 1535.34   44.55
   1  -1   3 1501.82   43.40
   1   1  -3 1378.63   42.38
  -1   1  -3 1596.18   46.64
   1  -1  -3 1448.24   43.77
   1  -1  -3 1530.33   44.53
   1   1  -3 1494.84   43.45
  -1   1   3 1494.65   43.36
  -1  -1   3 1518.42   43.97
   1   1   3 1402.57   40.47
  -1   1  -3 1499.86   43.33
   1  -1   3 1535.88   44.31
  -1  -1  -3 1505.52   43.43
  -1  -1   3 1554.44   45.39
  -2   1   0 2458.29   70.87
  -2  -1   0 2668.15   77.02
  -2  -1   0 2353.33   69.03
  -2  -1   0 2612.23   76.27
   2   1   0 2484.96   71.91
   2  -1   0 2466.13   72.13
  -2  -1   0 2605.49   75.50
   0   0  -4   -0.00    0.25
   0   0   4    0.16    0.20
   0   0  -4   -0.20    0.37
   0   0  -4    0.24    0.18
  -2  -1   1 1273.41   37.32
   2  -1   1 1203.67   34.86
  -2  -1   1 1105.35   33.59
  -2  -1  -1 1247.41   36.18
   2   1  -1 1272.58   38.36
  -2  -1  -1 1194.73   35.36
  -2  -1   1 1266.73   36.82
   2  -1   1 1193.00   34.47
   2  -1  -1 1219.05   35.31
  -2  -1   1 1212.39   35.48
  -2   1  -1 1213.06   35.11
   2   1  -1 1247.02   36.15
  -2   1  -1 1040.14   31.57
  -2   1   1 1225.32   35.48
   2   1  -1 1209.67   35.88
   2  -1   1 1198.15   34.86
   2   1  -1 1054.30   31.10
  -1   2  -2 2635.34   76.10
  -1  -2   2 2510.27   72.43
  -1   2  -2 2516.38   72.67
  -1   2   2 2642.74   76.08
  -1  -2  -2 2472.90   72.02
   1  -2  -2 2530.89   72.92
  -1   2   2 2580.35   74.34
   1  -2   2 2541.21   73.23
  -1  -2   2 2595.98   78.45
   1  -2   2 2542.43   73.23
   1   2  -2 2384.15   69.04
  -1  -2  -2 2465.72   72.41
  -1  -2   2 2490.39   71.92
  -1   2   2 2588.64   74.98
   1   2  -2 2382.14   69.03
   1  -2  -2 2240.10   71.83
  -1  -2  -2 2594.98   74.87
  -2   0  -2    6.44    1.05
  -2   0  -2    3.08    0.36
   2   0   2    2.60    0.35
   2   0  -2    3.29    0.56
  -2   0  -2    2.93    0.27
   2   0  -2    2.73    0.50
   2   0  -2    3.47    0.54
  -2   0   2    3.26    0.49
  -2   0   2    2.55    0.34
   2   0  -2    2.69    0.38
   0   1   4   45.07    1.59
   0   1  -4   43.13    1.57
   0  -1   4   45.81    1.60
   0   1   4   46.17    1.58
   0  -1  -4   45.10    1.59
   0  -1  -4   45.53    1.61
   0  -1   4   39.95    1.54
   0   1  -4   43.77    2.07
   0  -1   4   44.42    1.94
   0  -2   3  838.05   24.92
   0  -2  -3  787.38   23.03
   0   2  -3  801.86   23.41
   0  -2   3  794.41   23.11
   0  -2  -3  774.34   22.50
   0   2  -3  827.26   24.39
   0  -2   3  805.81   23.64
  -1   0   4  125.79    3.95
  -1   0  -4  132.44    4.47
   1   0  -4  134.56    4.39
  -1   0   4  125.58    4.03
   1   0  -4  133.31    4.42
   1   0  -4  126.69    4.09
  -1   0  -4  135.03    4.15
  -1   0   4  118.98    3.77
   1   0  -4  133.41    4.20
  -2   1   2  250.73    7.53
   2  -1  -2  269.95    8.73
  -2  -1  -2  249.05    7.53
   2   1  -2  269.90    8.11
   2  -1   2  251.03    7.56
   2   1  -2  261.63    8.59
  -2  -1   2  244.27    7.85
  -2  -1  -2  245.30    7.29
   2  -1   2  248.12    7.36
  -2  -1   2  254.54    7.86
   2   1  -2  218.30    7.10
   2  -1   2  219.64    7.11
  -2   1  -2  245.93    7.31
  -2   1   2  267.80    9.08
  -2  -1  -2  254.02    7.66
  -2   1  -2  243.06    7.28
  -2  -1   2  262.15    8.09
  -2  -1   2  230.78    7.06
   2   1  -2  253.54    8.06
   2  -1  -2  254.84    7.66
  -2   1  -2  243.75    7.47
  -1  -1   4 1144.44   33.67
   1  -1   4 1170.92   33.87
  -1   1  -4 1133.13   32.82
  -1   1   4 1139.59   33.06
   1   1  -4 1141.41   33.29
   1  -1  -4 1131.06   33.08
   1   1   4 1181.73   34.13
  -1  -1   4 1135.54   33.38
   1   1  -4 1192.33   34.57
  -1  -1  -4  974.91   29.00
   1   1   4 1104.80   32.20
  -1  -1   4 1156.44   33.60
   1  -1  -4 1145.57   33.32
   1  -1  -4 1161.10   34.07
  -1   1  -4 1182.94   34.84
   1   1  -4 1200.27   35.34
   1  -1   4 1013.62   30.01
  -1   1   4 1030.44   29.95
  -1  -1  -4 1154.85   33.43
   1   1  -4 1182.68   35.02
   1  -2   3  311.50    9.20
  -1  -2   3  298.88    8.96
   1   2  -3  288.75    8.76
  -1   2   3  316.29    9.52
  -1  -2   3  319.23   10.07
   1  -2  -3  299.34    9.15
  -1   2  -3  307.56    9.25
  -1  -2  -3  309.39    9.28
  -1   2  -3  301.04    9.25
  -1  -2  -3  322.23    9.51
   1   2   3  291.79    8.87
  -1  -2   3  304.23    9.18
   1  -2   3  309.53    9.21
   1  -2  -3  291.76    8.68
   0   3   0    0.13    0.21
   0  -3   0    0.19    0.23
   0   3   0    0.06    0.22
   0   3   0    0.27    0.29
   0   3   0    0.18    0.24
   0  -3   0    0.20    0.32
   0  -3   0   -0.00    0.19
  -2   0   3    5.89    0.45
   2   0  -3    8.15    0.64
   2   0  -3    6.43    0.50
  -2   0   3    6.66    0.58
   2   0   3    5.94    0.43
   2   0   3    5.91    0.43
   2   0  -3    7.31    0.68
  -2   0  -3    6.46    0.76
   2   0  -3    6.78    0.65
  -2   0  -3    6.21    0.44
  -2   0  -3    6.29    0.42
  -2  -2   0 5586.47  161.34
   2   2   0 5534.36  159.41
  -2   2   0 5527.73  159.09
  -2  -2   0 5489.80  158.43
  -2   2   0 5387.41  154.81
   2  -2   0 4944.17  143.53
  -2   2   0 5656.20  165.35
  -2  -2   0 5651.84  166.27
   2  -2   0 5617.90  161.79
   0  -3  -1 3742.52  107.89
   0   3   1 3553.64  102.55
   0   3  -1 3693.31  106.64
   0  -3   1 3659.45  105.65
   0  -3   1 3679.73  106.42
   0  -3  -1 3587.83  103.23
   0   3   1 3701.42  106.89
   0  -3  -1 3523.32  101.52
   0  -3   1 3257.79   93.98
   0   3  -1 3727.56  107.43
   0   3  -1 3678.14  105.92
   0   3   1 3638.09  104.71
   0   3  -1 3683.36  106.37
   2  -2  -1 3385.20   97.45
  -2   2  -1 3211.79   92.52
   2   2  -1 3579.72  104.14
  -2  -2  -1 3554.79  103.03
  -2  -2   1 3495.65  100.84
  -2   2  -1 3581.99  103.11
  -2   2  -1 3459.55  100.01
   2  -2  -1 3484.38  102.49
   2  -2   1 3287.43   95.02
  -2  -2   1 3414.44  100.85
   2   2   1 3589.18  103.30
  -2  -2   1 3385.36  103.34
  -2   2   1 3538.81  102.33
   2  -2   1 3560.52  102.40
   2  -2   1 3434.66   98.83
  -2   2   1 3472.52  101.00
   2   2  -1 3598.50  105.15
  -2  -2   1 3218.87   92.91
  -2  -2  -1 3511.68  102.52
  -2   2   1 3523.39  101.43
  -2  -1  -3  193.39    5.80
   2  -1   3  187.38    5.62
  -2   1  -3  182.26    5.85
  -2  -1   3  190.16    6.16
   2   1  -3  182.69    6.20
  -2   1   3  191.39    6.06
  -2  -1  -3  186.76    5.72
   2   1  -3  188.94    5.79
  -2  -1   3  181.17    5.60
   2  -1   3  184.13    6.17
   2   1  -3  193.11    6.46
   2  -1   3  184.55    5.65
  -2   1   3  179.72    5.51
   2   1  -3  183.03    5.95
   2  -1  -3  189.71    6.28
   2  -1  -3  189.46    7.44
  -2  -1   3  189.96    6.08
  -2  -1   3  175.77    5.53
  -2   1  -3  181.12    5.46
  -2   1  -3  155.28    4.94
   2  -1  -3  188.53    5.76
   0   0   5    0.19    0.17
   0   0  -5    0.09    0.18
   0   0   5    0.11    0.19
   0   0  -5   -0.08    0.46
   1   3   0   51.09    2.05
  -1  -3   0   57.36    2.16
  -1   3   0   53.04    1.82
   1  -3   0   52.78    1.76
  -1  -3   0   51.78    1.92
  -1  -3   0   55.24    2.01
  -1  -3   0   55.66    2.00
  -1   3   0   53.62    1.87
   1  -3   0   49.84    1.73
  -1   3   0   52.33    1.85
   0   2  -4    0.31    0.23
   0  -2   4    0.05    0.20
   0  -2  -4    0.21    0.16
   0   2  -4   -0.08    0.57
   0  -2   4    0.56    0.26
   0  -2   4    0.32    0.59
   0   2   4    0.13    0.14
   0  -2  -4    0.13    0.18
   0   2   4    0.22    0.19
   0  -3  -2 2398.52   90.78
   0   3  -2 2435.03   70.50
   0  -3   2 2588.79   75.10
   0   3  -2 2524.44   73.04
   0  -3  -2 2441.27   70.51
   0   3  -2 2441.79   70.53
   0  -3  -2 2550.29   74.42
   0  -3   2 2497.23   72.12
   0   3  -2 2410.48   90.91
   0  -3  -2 2451.03   70.70
  -1  -3  -1  780.73   28.80
   1  -3  -1  727.91   26.88
   1   3  -1  765.50   28.43
  -1   3  -1  748.31   27.60
  -1   3   1  756.13   27.84
   1   3   1  650.23   23.99
  -1  -3   1  749.82   27.78
  -1  -3   1  687.87   25.66
  -1  -3  -1  781.45   28.93
  -1  -3   1  723.61   26.92
  -1   3  -1  777.53   28.67
  -1   3   1  770.40   28.37
   1  -3  -1  724.66   26.84
   1  -3  -1  770.26   28.29
   1   3   1  788.24   29.42
  -1  -3  -1  776.18   28.64
  -1   3  -1  768.23   28.33
  -1  -3   1  787.47   29.11
  -1   3   1  752.77   29.13
   1   3  -1  804.58   29.88
  -1  -3  -1  767.09   28.70
  -1   3   1  767.89   28.51
   1  -3   1  763.27   28.03
  -2  -2   2  149.04    5.83
   2   2  -2  142.25    5.70
  -2   2   2  145.21    5.93
  -2  -2   2  151.20    5.81
  -2   2   2  153.15    6.07
   2  -2   2  147.54    5.84
   2  -2   2  139.28    5.27
   2  -2  -2  150.13    5.72
   2  -2   2  145.17    5.53
  -2  -2  -2  148.53    5.81
  -2   2   2  145.17    5.54
   2   2  -2  140.76    5.65
  -2   2  -2  147.54    5.65
  -2  -2   2  153.74    6.03
  -2  -2  -2  145.29    5.60
   2   2  -2  151.15    6.07
  -2  -2   2  151.47    6.34
   2  -2  -2  160.07    6.45
  -2   2  -2  145.88    5.65
   0   1   5   15.07    0.75
   0   1  -5   14.13    1.18
   0   1  -5   14.57    0.78
   0  -1  -5   15.50    0.81
   0  -1   5   16.24    0.86
   0  -1   5   13.22    0.92
   0   1   5   15.06    0.77
   0  -1  -5   14.66    0.77
   1   0  -5  230.16    8.74
  -1   0   5  222.81    8.41
   1   0  -5  230.67    8.91
  -1   0   5  232.73    8.76
  -1   0  -5  222.37    8.65
   1   0  -5  237.32    9.11
  -1   0  -5  221.78    8.31
   1   0  -5  204.32    7.77
  -1   2   4  201.69    7.60
   1  -2  -4  237.41    8.92
   1   2  -4  234.41    8.91
   1  -2  -4  236.12    9.13
  -1  -2   4  232.17    8.78
  -1   2   4  232.59    8.78
   1  -2   4  238.98    8.92
  -1  -2   4  238.93    9.00
  -1   2  -4  242.57    9.09
  -1  -2  -4  235.33    8.79
  -1   2  -4  233.04    9.02
  -1  -2   4  241.73    9.51
  -1   2   4  255.03    9.65
  -1  -2  -4  244.44    9.17
   1  -2   4  231.32    8.70
   1   2   4  242.46    9.20
  -1   2  -4  243.78    9.30
   1  -2  -4  246.92    9.42
   1   2  -4  206.05    8.14
   2   0  -4  212.36    8.25
  -2   0  -4  205.42    8.17
   2   0  -4  199.20    7.56
  -2   0   4  221.40    8.45
   2   0  -4  214.32    8.74
  -2   0  -4  194.43    7.30
  -2   0  -4  209.87    7.93
   2   0  -4  213.29    8.26
  -2   0   4  203.97    7.79
  -1   3  -2 1159.39   42.56
   1  -3   2 1135.27   41.65
  -1  -3   2 1181.81   43.69
  -1   3  -2 1105.88   40.66
  -1   3   2 1150.11   42.34
   1   3  -2 1097.89   40.55
  -1   3  -2 1134.90   41.71
  -1  -3  -2 1131.00   41.93
  -1  -3  -2 1135.17   41.69
  -1  -3   2  957.69   35.47
   1  -3  -2 1153.47   42.40
   1  -3  -2 1137.73   42.26
  -1   3   2 1068.33   39.24
  -1  -3   2 1147.98   42.17
  -1  -3   2 1186.16   43.70
   1  -3  -2 1173.99   43.04
  -1   3   2 1165.71   42.80
   1  -3   2 1120.48   41.17
  -1  -3  -2 1139.81   41.87
  -3   0   0    0.14    0.47
   3   0   0    0.12    0.28
  -3   0   0    0.21    0.27
  -3   0  -1 2096.98   79.09
  -3   0   1 1956.49   71.68
  -3   0   1 2069.45   90.85
   3   0  -1 2086.84   79.08
   3   0   1 2086.51   78.63
  -3   0  -1 1938.08   70.94
   1   1  -5   95.87    4.19
  -1  -1  -5   81.23    3.29
   1   1   5   91.43    3.53
  -1  -1  -5   94.03    3.64
  -1   1  -5   92.05    3.59
   1   1  -5   92.99    3.73
   1  -1   5   85.62    3.63
   1  -1  -5   88.75    3.52
  -1  -1   5   90.73    3.79
  -1   1   5   89.38    3.51
  -1   1  -5   93.76    4.12
   1  -1   5   82.34    3.20
   1  -1  -5   87.17    3.53
   1   1  -5   89.42    3.54
   1  -1   5   89.09    3.53
   1  -1  -5   94.18    3.80
   1   1  -5   78.08    3.25
  -1   1   5   93.22    3.66
   1   1   5   90.80    3.62
  -1  -1   5   91.32    3.63
   0  -3  -3   52.62    2.28
   0  -3  -3   65.77    2.74
   0   3  -3   64.83    2.78
   0  -3  -3   61.23    2.48
   0  -3  -3   63.97    2.61
   0   3  -3   63.05    2.63
   0  -3   3   62.30    2.60
   0  -3   3   64.10    2.93
   0  -3  -3   63.68    2.52
   0  -3   3   63.64    2.56
   2  -1   4   29.43    1.64
  -2   1  -4   28.63    1.61
   2  -1   4   27.71    1.26
  -2  -1   4   30.41    1.45
   2   1  -4   27.93    1.47
   2  -1  -4   30.83    1.57
   2  -1   4   29.81    1.27
  -2  -1  -4   30.84    1.32
  -2   1  -4   29.24    1.27
  -2   1   4   23.12    1.19
  -2  -1  -4   29.57    1.35
  -2  -1   4   30.77    1.58
  -2   1  -4   29.32    1.32
   2   1  -4   29.65    1.77
   2  -1  -4   30.10    1.37
  -2  -1  -4   30.42    1.44
   2  -1  -4   31.67    1.66
   2   1   4   29.28    1.26
  -2   1   4   30.69    1.47
   2   1  -4   28.10    1.46
   2   1  -4   29.86    1.37
  -2   2   3  187.33    7.26
   2  -2  -3  191.63    7.54
   2  -2   3  179.39    7.17
  -2   2  -3  181.12    6.98
  -2  -2   3  189.04    7.72
  -2  -2  -3  180.39    6.78
   2  -2   3  179.74    6.75
   2   2  -3  181.80    7.29
  -2  -2   3  178.71    6.87
   2   2  -3  178.72    6.98
  -2   2   3  180.87    7.10
  -2  -2   3  173.36    6.66
   2  -2  -3  182.28    6.90
   2  -2   3  177.29    6.70
  -2   2   3  177.44    6.72
  -2   2  -3  181.40    6.90
  -2  -2  -3  188.21    7.24
  -2  -2  -3  185.02    7.02
  -2  -2   3  178.13    6.89
   3  -1   0  250.83    9.42
   3   1   0  236.28    8.90
  -3  -1   0  253.81    9.86
  -3  -1   0  247.27    9.32
  -3   1   0  252.28    9.47
  -3  -1   0  252.28    9.82
  -3  -1   0  245.93    9.49
   3  -1   0  247.39    9.38
   3   1  -1  443.21   16.75
   3  -1   1  461.93   17.12
  -3  -1   1  476.46   17.93
  -3  -1   1  445.14   16.88
  -3  -1  -1  433.16   16.50
  -3  -1   1  466.47   17.59
  -3  -1  -1  449.57   16.71
  -3  -1   1  451.36   16.81
  -3   1   1  461.06   17.08
  -3   1  -1  443.09   16.43
   3  -1   1  426.99   16.07
  -3   0   2  506.59   21.04
   3   0  -2  477.20   17.70
  -3   0  -2  501.36   18.49
  -3   0  -2  501.78   18.57
   3   0   2  505.54   18.80
   3   0  -2  517.23   23.17
   3   0  -2  498.06   18.69
  -3   0   2  495.40   18.36
  -1  -3  -3 1086.68   40.39
   1  -3  -3 1027.30   38.41
  -1  -3  -3 1079.08   39.62
   1   3  -3 1053.88   38.87
   1   3   3 1019.58   37.67
  -1   3  -3  998.06   36.82
  -1   3   3 1070.65   39.43
  -1  -3  -3 1060.80   38.98
  -1   3  -3 1076.97   39.65
  -1   3  -3  931.70   34.38
   1  -3   3 1086.50   39.88
   1  -3  -3 1088.39   39.92
  -1  -3   3 1087.14   39.96
  -1  -3  -3 1027.87   37.75
  -1  -3   3 1056.10   39.44
   1  -3  -3 1096.54   40.28
   1  -3   3 1056.57   38.98
   0   2   5  157.62    5.94
   0  -2   5  157.95    6.00
   0  -2  -5  162.09    6.17
   0  -2  -5  154.86    5.89
   0   2   5  162.42    6.19
   0  -2   5  160.89    6.25
   0   2  -5  154.76    6.27
   0   2  -5  152.78    5.87
   0  -2   5  153.47    6.30
  -2  -3   0    3.66    0.44
   2  -3   0    3.20    0.29
   2  -3   0    3.38    0.42
  -2  -3   0    3.53    0.48
  -2   3   0    3.13    0.28
   2   3   0    2.95    0.52
  -2  -3   0   10.32    0.72
  -2   3   0    3.08    0.34
  -2   3   0    2.82    0.33
   2   3   0    3.02    0.38
  -2  -3   0    2.45    0.46
   0   0   6  310.56   11.58
   0   0  -6  312.82   11.93
   0   0   6  297.49   11.07
   0   0  -6  312.84   11.70
   0   0  -6  311.33   11.66
   3  -1   2  682.34   25.56
  -3  -1   2  704.02   25.99
  -3  -1  -2  707.02   26.10
  -3  -1  -2  675.67   24.95
  -3  -1   2  686.95   25.58
   3   1  -2  719.67   27.32
  -3   1  -2  569.42   21.01
  -3   1  -2  666.71   24.61
   3   1  -2  691.55   28.27
  -3  -1   2  636.97   24.97
  -3  -1  -2  638.97   23.81
   3   1  -2  648.66   24.34
   3   1  -2  712.14   26.26
   3  -1   2  694.41   25.59
  -3   1   2  695.21   27.74
   3  -1  -2  682.67   25.18
  -3  -1   2  641.53   24.16
  -3   1  -2  680.08   25.05
  -3   1   2  704.74   25.97
  -2  -3  -1  234.92    8.95
   2  -3   1  213.71    8.05
   2  -3  -1  204.99    7.72
  -2  -3   1  228.79    8.79
  -2   3  -1  214.39    8.10
  -2  -3   1  221.17    8.47
  -2   3  -1  218.08    8.24
   2   3   1  217.30    8.20
  -2   3   1  226.58    8.53
   2   3  -1  232.02    9.09
   2   3  -1  210.24    8.25
  -2  -3  -1  203.04    8.10
  -2   3   1  232.26    9.02
   2  -3   1  226.09    8.44
  -2  -3   1  226.69    8.96
   2  -3   1  221.37    8.45
  -2   3   1  221.59    8.28
  -2  -3  -1  228.29    8.84
  -2   3  -1  213.91    8.07
  -2  -3  -1  219.25    8.35
   2   3  -1  227.39    8.63
   2  -3  -1  211.18    8.00
   1   2   5  538.71   20.02
   1   2  -5  572.88   21.56
  -1   2  -5  507.65   19.22
   1  -2  -5  560.95   20.87
   1  -2   5  540.49   20.00
   1  -2  -5  482.24   18.98
  -1  -2   5  553.26   20.50
   1  -2  -5  564.35   20.84
  -1  -2  -5  543.11   20.05
   1   2  -5  546.76   20.33
  -1  -2   5  511.68   18.92
  -1  -2   5  533.93   20.20
   1   2   5  569.89   20.98
   1  -2   5  545.87   20.11
  -1   2   5  546.28   20.20
  -1   2  -5  557.35   20.59
  -1  -2  -5  557.38   20.57
   1  -2   5  540.62   20.48
  -1   2   5  546.43   20.17
   0  -3  -4  517.82   19.20
   0  -3   4  543.28   20.06
   0   3   4  500.66   18.56
   0  -3  -4  548.02   20.34
   0   3  -4  555.66   20.73
   0  -3   4  560.19   21.28
   0  -3   4  556.82   20.63
   0  -3  -4  503.01   18.72
  -2   0  -5    0.92    0.56
   2   0  -5    1.28    0.50
  -2   0  -5    2.93    0.29
   2   0  -5    0.71    0.30
  -2   0   5    0.58    0.22
   2   0  -5    0.92    0.35
   2   0  -5    0.97    0.34
  -2   0   5    0.85    0.25
  -2   0   5    0.97    0.31
   0  -1  -6  143.64    5.52
   0   1   6  148.97    6.31
   0   1  -6  148.97    6.12
   0  -1  -6  139.42    5.35
   0  -1   6  146.23    5.62
   0   1  -6  140.02    5.39
   0   1   6  141.62    5.41
   3   0   3    9.51    0.62
   3   0  -3    8.68    0.60
   3   0  -3   11.00    0.94
  -3   0   3    9.51    0.75
  -3   0  -3    9.15    0.52
   3   0  -3    9.33    0.80
   3   0  -3   11.58    0.91
  -3   0   3    9.53    0.72
  -3   0  -3    8.72    0.75
  -3   0  -3    8.02    0.54
  -3   0   3    8.95    0.59
   2  -2  -4  619.51   23.12
   2  -2   4  565.84   20.83
   2   2  -4  631.13   24.07
  -2   2  -4  603.41   22.44
  -2  -2  -4  606.16   22.32
  -2  -2   4  606.01   23.00
   2  -2   4  574.89   21.87
   2  -2   4  601.92   22.19
  -2  -2   4  584.05   21.68
  -2   2   4  628.55   23.33
   2  -2  -4  572.80   21.71
  -2  -2   4  590.08   21.86
  -2   2   4  621.47   23.04
  -2   2  -4  589.12   21.79
  -2  -2  -4  596.63   22.09
   2   2  -4  598.62   22.34
  -2   2  -4  566.49   20.93
   2  -2  -4  595.36   21.97
   1   0   6  706.81   25.97
  -1   0  -6  690.22   25.41
  -1   0  -6  691.04   25.97
   1   0  -6  708.75   26.37
   1   0   6  649.87   24.02
  -1   0   6  705.68   26.04
  -1   0   6  711.64   26.23
   1   0  -6  709.25   26.19
   1   0  -6  697.25   25.78
   1   0  -6  704.78   26.26
  -2   3  -2 1255.86   46.24
   2  -3  -2 1243.46   45.69
   2   3  -2 1230.43   45.61
  -2  -3   2 1349.29   49.63
  -2   3   2 1215.77   45.94
  -2  -3  -2 1250.32   45.94
  -2   3   2 1362.83   50.22
   2  -3   2 1301.78   47.70
   2  -3  -2 1237.89   45.39
  -2  -3  -2 1213.42   44.84
  -2  -3   2 1232.17   45.38
  -2   3  -2 1174.08   43.39
  -2   3   2 1245.66   45.62
   2  -3   2 1210.36   44.87
  -2  -3   2 1284.77   48.77
   2   3  -2 1274.40   46.91
  -2  -3  -2 1241.04   45.71
  -2   3  -2 1288.67   47.28
   2  -3   2 1303.84   48.10
   0  -4   0  236.86    9.22
   0  -4   0  245.97    9.24
   0   4   0  238.82    9.12
   0  -4   0  248.99    9.35
   0   4   0  243.37    9.25
   0   4   0  243.58    9.18
  -3  -2   0    8.97    0.81
  -3   2   0    9.47    0.57
   3  -2   0    9.65    0.61
  -3   2   0    9.63    0.54
   3   2   0    9.21    0.62
  -3  -2   0    9.06    0.62
  -3  -2   0   12.15    1.00
   3  -2   0    9.41    0.62
  -3  -2   0    7.90    0.71
   0   4  -1  223.07    8.77
   0   4   1  217.79    8.60
   0   4  -1  214.34    8.43
   0  -4  -1  221.81    8.59
   0   4  -1  218.43    8.55
   0   4   1  208.81    8.11
   0  -4  -1  237.14    9.16
   0   4   1  216.16    8.48
   0   4  -1  218.56    8.51
   0  -4  -1  216.02    8.44
   0  -4   1  207.85    8.20
   0  -4   1  202.85    7.96
  -3   2   1   22.70    1.08
   3  -2   1   21.18    1.04
  -3   2  -1   23.53    1.11
  -3  -2  -1   22.69    1.16
   3   2  -1   19.64    1.29
  -3  -2  -1   21.84    1.35
  -3  -2   1   23.25    1.16
  -3   2   1   24.12    1.41
  -3  -2   1   23.58    1.34
  -3  -2   1   24.44    1.36
  -3   2  -1   23.25    1.06
  -3   2   1   23.58    1.08
  -3  -2  -1   23.10    1.31
   3   2  -1   23.70    1.27
   3  -2   1   21.38    1.13
   3  -2  -1   26.08    1.25
   3   2   1   22.68    1.10
  -3   2  -1   22.21    1.09
  -3  -2   1   23.68    1.51
  -2  -1   5  604.48   23.04
  -2   1   5  585.24   22.28
  -2   1  -5  638.35   24.31
  -2  -1   5  631.25   24.12
  -2   1  -5  626.14   24.25
   2   1  -5  596.41   23.46
   2   1  -5  620.63   24.03
   2  -1   5  607.25   23.32
  -2  -1   5  636.06   24.41
  -2  -1  -5  621.26   23.55
   2   1  -5  596.43   22.77
  -2   1  -5  602.79   22.87
   2   1   5  640.99   24.29
   2  -1  -5  620.42   23.57
  -2  -1  -5  553.87   21.65
  -2   1   5  601.51   23.09
  -2   1   5  617.01   23.49
   2   1  -5  610.13   23.49
   2  -1  -5  601.88   23.13
   2  -1   5  622.33   23.56
  -2  -1  -5  605.08   23.02
   2  -1  -5  625.22   24.03
   3  -1   3  931.34   35.17
   3   1  -3  857.45   36.98
   3   1  -3  944.94   35.79
   3  -1  -3  921.24   40.45
  -3  -1   3  954.54   36.20
   3   1  -3  895.24   37.16
   3  -1   3  953.91   36.11
  -3  -1  -3  957.93   36.22
  -3   1  -3  921.29   34.84
  -3   1   3  968.85   37.78
  -3  -1   3  997.44   37.99
  -3   1  -3  940.13   35.70
   3   1  -3 1000.42   38.51
  -3  -1  -3  860.17   32.62
   3  -1   3  864.30   34.11
  -3  -1  -3  977.31   38.60
  -3  -1  -3  923.85   34.96
  -3  -1   3  965.61   37.53
  -3   1   3  880.94   33.35
   3  -1  -3  939.64   35.57
  -3   1  -3  925.98   35.04
  -1  -3   4  628.21   24.07
  -1   3  -4  710.70   27.10
  -1   3  -4  733.59   27.96
   1  -3   4  709.09   26.89
   1   3   4  704.45   26.86
   1  -3  -4  714.01   27.31
   1   3  -4  700.03   26.76
  -1  -3   4  684.44   26.45
  -1  -3  -4  727.59   27.58
   1  -3  -4  708.82   26.85
  -1  -3   4  695.51   26.39
   1  -3   4  680.23   25.81
  -1  -3  -4  722.40   27.33
  -1   1   6 1247.76   47.11
  -1   1  -6 1230.22   47.07
   1   1  -6 1205.35   45.62
   1  -1  -6 1249.70   47.22
   1  -1  -6 1237.17   46.89
  -1   1   6 1223.97   46.22
   1   1  -6 1099.40   41.91
   1   1  -6 1232.71   47.05
   1  -1   6 1197.43   45.53
  -1  -1   6 1250.84   47.50
   1   1   6 1231.06   46.42
  -1  -1  -6 1148.12   43.41
  -1   1  -6 1080.42   41.58
   1   1   6 1162.27   43.96
  -1  -1   6 1025.01   38.75
  -1  -1  -6 1189.50   44.93
   1  -1  -6 1214.83   46.01
   1   1  -6 1229.15   46.50
   1  -1   6 1231.43   46.52
  -1  -1   6 1228.22   46.43
   1  -4   0  134.64    5.25
  -1  -4   0  135.46    5.45
  -1   4   0  137.61    5.43
  -1   4   0  133.90    5.31
  -1  -4   0  133.89    5.36
  -1  -4   0  139.71    5.59
   1   4   0  115.23    4.71
  -1   4   0  130.23    5.17
   1  -4   0  111.12    4.51
  -1  -4   0  141.70    5.63
   1   4   0  135.24    5.56
   0  -4   2  166.22    6.51
   0   4   2  161.87    6.66
   0  -4  -2  158.22    6.38
   0  -4   2  154.03    6.22
   0   4  -2  162.63    6.66
   0  -4  -2  167.85    6.55
   0   4  -2  163.94    6.48
   0   4  -2  170.47    6.73
   0   4  -2  163.58    6.50
   0  -4  -2  163.07    6.37
  -3  -2   2  797.40   30.44
  -3   2   2  834.27   31.86
  -3   2  -2  803.47   30.53
  -3  -2  -2  805.74   30.65
   3  -2   2  816.36   31.14
  -3  -2  -2  819.27   31.07
  -3  -2   2  790.69   30.82
   3  -2   2  709.83   26.91
   3   2  -2  827.65   31.82
  -3   2  -2  680.52   25.77
  -3  -2   2  806.29   30.72
   3   2  -2  854.02   32.75
  -3  -2  -2  759.08   29.19
  -3  -2   2  834.42   31.71
   3  -2  -2  797.80   30.22
   3  -2   2  834.22   31.59
  -3   2   2  749.95   28.76
  -3   2  -2  820.95   31.08
  -3   2   2  803.20   31.67
   3   2  -2  788.02   30.33
  -1   4   1  398.34   15.22
  -1  -4  -1  382.56   14.81
  -1  -4   1  398.50   15.31
   1   4  -1  412.56   16.07
   1  -4  -1  385.69   14.94
  -1   4  -1  393.86   15.09
  -1   4   1  415.32   15.92
  -1  -4   1  392.65   15.07
  -1  -4  -1  413.33   15.86
  -1  -4   1  392.97   15.19
   1  -4  -1  401.45   15.29
   1  -4   1  397.95   15.15
  -1   4  -1  370.80   14.23
  -1   4  -1  388.01   14.92
   1   4   1  409.75   16.02
  -1  -4  -1  399.98   15.38
   1   4  -1  414.28   16.02
   1  -4  -1  401.90   15.34
  -1   4   1  392.38   15.02
  -1  -4  -1  406.99   15.58
   1   4   1  392.15   15.00
  -1  -4   1  406.58   15.60
   2  -3  -3  710.65   26.93
  -2   3  -3  679.51   25.82
  -2   3   3  761.17   29.15
  -2  -3   3  698.06   26.57
  -2   3  -3  667.08   25.29
   2  -3   3  651.46   24.65
  -2   3   3  661.24   25.06
  -2  -3   3  697.42   27.26
  -2  -3  -3  645.96   25.04
  -2   3  -3  674.75   25.69
  -2   3   3  710.44   27.12
  -2  -3   3  702.29   26.76
   2   3  -3  707.10   27.01
  -2  -3  -3  706.93   26.99
  -2   3   3  707.86   26.83
   2  -3   3  684.56   26.26
   2   3  -3  709.65   27.19
   2  -3  -3  698.83   26.92
   2  -3   3  721.27   27.32
  -2  -3  -3  687.15   26.11
   3   0  -4  423.08   16.44
  -3   0   4  429.65   16.71
   3   0  -4  502.03   19.38
  -3   0  -4  414.63   16.26
   3   0  -4  399.11   15.31
   3   0  -4  512.30   19.88
  -3   0   4  391.10   15.00
  -3   0  -4  417.08   15.92
   3   0   4  409.02   15.65
   3   0   4  346.86   13.22
  -3   0  -4  418.25   15.91
  -3   0   4  426.13   16.47
   0  -2  -6   15.17    0.79
   0   2   6   14.88    0.79
   0  -2  -6   15.44    0.81
   0  -2   6   13.46    0.72
   0  -2   6   14.22    0.85
   0   2   6   14.90    0.74
   0   2  -6   15.99    1.26
   0   2  -6   14.40    0.80
   0  -2   6   15.22    0.84
   0  -2   6   13.72    1.08
   1   4  -2  571.13   21.96
  -1   4   2  490.70   18.77
  -1   4  -2  557.48   21.29
  -1  -4  -2  543.19   20.68
  -1  -4   2  566.31   21.79
  -1   4   2  549.78   20.93
   1  -4   2  552.25   21.00
  -1  -4  -2  490.91   19.36
  -1   4  -2  538.22   20.52
   1  -4  -2  548.16   20.77
  -1  -4   2  557.85   21.27
  -1  -4  -2  546.25   20.91
  -1   4  -2  545.51   20.80
  -1  -4  -2  549.73   20.97
   1  -4  -2  545.15   20.82
   1  -4  -2  547.76   20.89
   1   4  -2  557.11   21.34
   1  -4   2  536.28   20.51
   0   3  -5   36.49    1.85
   0   3  -5   33.95    1.55
   0  -3   5   39.71    1.80
   0   3   5   36.94    1.65
   0  -3  -5   38.71    1.68
   0  -3   5   37.53    1.63
   0  -3  -5   39.27    1.72
   0  -3   5   39.13    2.19
   0  -3  -5   37.02    1.70
  -2   2   5   39.76    1.79
  -2   2  -5   38.80    1.93
  -2  -2   5   39.24    1.77
  -2   2   5   34.16    1.52
   2  -2   5   39.91    1.72
  -2  -2  -5   39.83    1.75
  -2   2  -5   41.58    1.87
   2  -2  -5   41.75    1.82
   2  -2  -5   40.91    2.08
   2   2  -5   39.89    2.19
  -2  -2   5   38.60    1.76
  -2   2   5   40.16    1.83
   2  -2  -5   40.58    1.96
   2  -2   5   42.44    2.25
  -2  -2   5   37.68    1.94
   2  -2   5   37.70    1.60
  -2  -2  -5   40.50    1.71
  -2   2  -5   38.90    1.68
  -2  -2   5   40.02    1.79
   2   2  -5   41.31    1.94
  -3   1   4 1371.52   52.48
   3  -1  -4 1542.28   54.17
   3   1  -4 1606.44   57.27
  -3  -1   4 1551.82   56.04
   3   1  -4 1481.58   62.45
   3  -1  -4 1498.70   70.37
   3  -1   4 1511.60   53.18
  -3  -1   4 1469.21   55.63
  -3  -1  -4 1472.68   55.74
   3   1  -4 1552.21   54.53
   3  -1  -4 1488.55   66.21
   3   1  -4 1506.85   56.29
  -3   1   4 1529.21   54.55
  -3   1  -4 1536.66   53.91
  -3  -1  -4 1488.88   56.64
   3  -1   4 1536.00   53.84
  -3  -1  -4 1480.39   56.09
   3  -1   4 1501.22   57.01
  -3   1  -4 1466.52   55.60
  -3   1   4 1492.60   56.35
  -3   1  -4 1505.80   52.88
   0  -4  -3  408.51   15.74
   0   4  -3  410.56   15.77
   0  -4   3  388.05   14.87
   0   4  -3  380.16   14.73
   0  -4  -3  407.76   15.61
   0  -4   3  397.81   15.21
   0  -4   3  389.99   15.18
   0   4  -3  394.64   15.17
   0  -4  -3  411.68   15.74
   0   4  -3  394.38   15.17
   0  -4  -3  405.25   15.47
  -3   2  -3  722.86   27.50
  -3  -2   3  755.19   29.30
  -3  -2  -3  656.21   25.17
   3  -2  -3  733.27   27.81
   3   2  -3  765.18   29.36
  -3  -2   3  695.16   26.45
   3  -2   3  723.41   27.86
   3  -2   3  745.65   28.20
  -3  -2  -3  755.69   28.71
  -3  -2   3  732.12   27.91
  -3  -2   3  729.58   27.87
  -3   2   3  780.95   29.79
   3  -2  -3  759.75   29.20
   3  -2   3  770.66   29.21
  -3   2   3  686.70   26.04
   3   2  -3  741.49   28.72
  -3   2  -3  740.81   28.08
  -3  -2  -3  732.24   27.80
  -3   2   3  753.64   28.90
   0   0  -7   -0.07    0.20
   0   0  -7    0.62    0.48
   0   0   7    0.09    0.19
   0   0   7   -0.01    0.17
   0   0  -7   -0.03    0.16
   1  -2   6  589.29   22.78
  -1   2   6  603.52   22.93
  -1  -2  -6  609.91   23.14
  -1   2  -6  609.56   23.53
   1   2  -6  613.55   23.83
  -1  -2   6  561.92   21.37
  -1  -2   6  585.41   22.57
  -1   2  -6  614.20   23.34
   1   2  -6  608.87   23.22
   1  -2  -6  601.20   23.07
  -1   2   6  631.36   23.93
   1   2   6  633.12   23.99
   1  -2   6  590.70   22.41
   1  -2  -6  626.60   23.78
  -1  -2  -6  617.43   23.42
   1  -2  -6  618.95   23.63
  -1  -2   6  610.52   23.26
   1  -2   6  581.01   22.11
   1   2   6  591.10   22.52
  -2   0  -6 1212.62   45.78
   2   0  -6 1188.60   46.67
  -2   0  -6 1214.48   46.38
   2   0   6 1173.19   44.58
  -2   0   6 1177.32   44.52
   2   0  -6 1153.83   43.84
  -2   0   6 1139.09   43.06
   2   0  -6 1190.27   45.41
   1   3  -5  147.67    5.90
  -1  -3   5  138.37    5.45
  -1  -3  -5  147.13    5.77
   1  -3   5  140.02    5.52
   1   3   5  142.05    5.65
   1  -3   5  134.60    5.28
   1  -3   5  119.91    5.20
   1  -3  -5  143.77    5.63
  -1   3   5  141.91    5.58
   1   3  -5  144.60    5.94
  -1   3  -5  146.16    5.93
   1  -3  -5  148.15    5.97
   1   3  -5  140.43    5.66
  -1  -3   5  139.35    5.92
  -1  -3  -5  144.81    5.64
  -1   3   5  120.30    4.71
   1  -3  -5  131.67    5.57
  -2  -3  -4  248.43    9.63
   2  -3   4  240.73    9.71
  -2  -3   4  248.60    9.65
  -2   3  -4  241.08    9.43
  -2  -3  -4  238.56    9.23
  -2   3  -4  234.39    9.11
   2  -3  -4  247.50    9.83
   2   3  -4  239.70    9.48
   2   3  -4  245.55    9.70
   2  -3   4  238.63    9.16
  -2   3   4  254.57    9.92
  -2  -3   4  238.61    9.31
  -2  -3   4  244.67    9.96
  -2  -3  -4  247.31    9.48
  -2   3   4  247.51    9.67
   2   3  -4  230.79    9.10
   2  -3  -4  238.21    9.19
   2  -3   4  245.51    9.46
   0  -1   7   16.66    0.88
   0   1  -7   17.16    1.27
   0   1  -7   16.10    0.86
   0  -1  -7   17.94    1.08
   0   1   7   17.25    0.84
   0  -1   7   16.08    0.81
   0  -1  -7   15.48    0.82
   0  -1  -7   16.19    0.86
   0   1   7   16.51    0.84
  -2  -1  -6  596.76   22.88
   2   1   6  611.98   23.19
   2  -1   6  557.65   21.41
   2  -1  -6  582.92   22.18
  -2   1   6  578.86   22.09
  -2  -1   6  551.21   21.03
   2   1  -6  612.51   23.32
  -2  -1  -6  596.40   22.68
   2  -1  -6  618.08   23.71
  -2  -1   6  603.53   22.96
  -2   1  -6  572.88   22.21
  -2  -1  -6  603.00   22.87
   2   1  -6  500.88   19.58
  -2  -1   6  581.92   22.37
  -2   1   6  554.68   21.25
   2  -1  -6  593.10   22.82
   2   1  -6  591.82   22.68
  -2  -1  -6  603.34   22.96
  -2   1   6  605.81   23.05
  -2   1  -6  589.43   22.38
   2   1  -6  604.42   23.61
   1  -4  -3  165.02    6.43
  -1  -4   3  156.68    6.48
   1  -4   3  161.03    6.26
  -1   4  -3  158.54    6.22
   1  -4   3  166.75    6.52
  -1  -4  -3  156.92    6.17
  -1   4  -3  164.45    6.52
   1   4   3  150.76    6.03
   1   4  -3  157.87    6.36
   1  -4  -3  164.81    6.79
   1  -4  -3  171.13    6.72
  -1  -4  -3  164.65    6.48
  -1  -4   3  162.72    6.39
  -1   4  -3  161.82    6.41
   1   4  -3  160.70    6.44
  -1  -4  -3  161.97    6.50
   3  -3   0  315.53   12.09
  -3   3   0  310.10   11.14
  -3  -3   0  301.19   11.86
   3   3   0  305.92   11.79
  -3  -3   0  318.76   12.68
  -3   3   0  302.06   11.54
   3  -3   0  302.15   11.67
  -3  -3   0  301.53   11.61
  -3  -3   0  301.80   11.83
   1   0   7  229.37    8.22
   1   0   7  201.81    7.32
   1   0  -7  217.70    7.93
   1   0  -7  218.28    8.16
  -1   0  -7  222.81    8.37
   1   0  -7  218.56    8.00
  -1   0   7  225.23    8.13
  -1   0  -7  215.49    7.79
  -1   0   7  210.58    7.62
   1   0  -7  226.14    8.32
   2   4   0   84.20    3.25
  -2   4   0   84.17    3.22
  -2  -4   0   84.62    3.33
  -2  -4   0   83.75    3.38
   2  -4   0   83.03    3.10
  -2   4   0   86.38    3.29
  -2   4   0   83.70    3.17
  -2  -4   0   86.14    3.44
   2  -4   0   80.55    3.16
   2   4   0   89.46    3.74
  -2  -4   0   87.64    3.46
   4   0   0    7.96    1.18
  -3  -3  -1  365.96   13.36
  -3  -3   1  362.92   12.99
   3  -3   1  345.91   12.48
  -3   3   1  357.87   12.74
  -3   3  -1  351.82   12.50
  -3  -3   1  341.51   12.44
  -3  -3  -1  366.55   13.28
  -3   3   1  366.75   13.41
  -3  -3  -1  319.69   11.86
  -3  -3   1  363.55   13.52
   3   3  -1  364.94   13.11
   3  -3  -1  373.61   13.37
   3   3   1  379.76   13.55
  -3  -3   1  352.23   12.81
   3  -3   1  355.18   12.65
  -3   3   1  366.17   13.06
  -3   3  -1  339.02   12.11
   3  -3   1  337.30   12.03
  -3   3  -1  351.37   12.58
  -2   4   1 1404.31   49.37
   2   4  -1 1385.53   49.31
   2   4   1 1349.95   47.45
   2   4  -1 1399.49   49.78
  -2  -4  -1 1362.76   48.16
  -2  -4   1 1307.98   46.07
   2   4   1 1374.13   48.90
  -2   4  -1 1390.69   48.93
  -2  -4   1 1343.05   47.72
  -2  -4  -1 1421.12   50.36
  -2   4   1 1410.65   49.99
  -2  -4   1 1411.66   49.71
   2  -4   1 1335.08   47.08
   2  -4   1 1345.20   47.29
  -2   4  -1 1281.56   45.11
   2  -4  -1 1405.77   49.45
   2   4  -1 1444.36   58.67
  -2  -4   1 1433.47   50.61
  -2  -4  -1 1476.70   60.01
  -2  -4  -1 1363.01   48.05
   2  -4  -1 1390.23   50.55
  -2   4  -1 1330.86   46.78
  -2   4   1 1348.67   47.44
   2  -4   1 1360.77   47.71
  -4   0  -1  687.41   24.22
   4   0  -1  696.70   24.72
  -4   0  -1  701.90   24.82
   4   0   1  700.20   24.80
   4   0  -1  630.82   22.80
  -4   0   1  716.03   25.61
  -4   0   1  686.42   24.32
  -3   0   5    3.75    0.42
   3   0  -5    3.73    0.57
   3   0  -5    4.58    0.44
   3   0  -5    4.26    0.53
  -3   0  -5    3.28    0.61
  -3   0  -5    3.52    0.32
   3   0  -5    4.00    0.63
  -3   0  -5    3.98    0.34
  -3   0   5    3.66    0.43
   1   1  -7  263.43    9.56
  -1  -1   7  257.94    9.31
   1  -1  -7  264.73    9.61
   1   1  -7  254.02    9.17
   1  -1  -7  242.93    8.82
  -1  -1  -7  269.61    9.89
  -1  -1  -7  261.07    9.40
   1   1  -7  274.85   10.01
   1  -1  -7  261.07    9.53
  -1   1  -7  258.48    9.77
   1   1  -7  260.07    9.80
  -1   1  -7  263.68    9.48
   1  -1   7  254.21    9.37
  -1  -1   7  255.11    9.62
   1   1   7  255.21    9.12
  -1  -1  -7  262.35    9.42
   1  -1   7  229.34    8.29
   1   1   7  249.90    9.03
  -1   1   7  253.92    9.12
  -1   1   7  263.97    9.49
  -1  -1   7  251.91    9.09
  -4  -1   0   17.93    1.16
   4   1   0   18.28    0.92
  -4  -1   0   17.82    0.93
   4  -1   0   18.36    0.94
  -4  -1   0   19.32    1.21
   4  -1   0   15.50    0.87
  -4   1   0   17.19    0.80
  -4   1   0   18.33    0.90
   0  -4  -4  630.00   22.42
   0  -4   4  607.40   21.54
   0   4   4  614.40   21.78
   0  -4  -4  601.56   21.27
   0  -4   4  608.52   21.64
   0   4  -4  634.49   22.57
   0  -4   4  616.44   22.23
   0   4  -4  610.97   21.78
   0   4  -4  627.87   22.30
   0  -4  -4  626.15   22.17
  -3   2   4  656.42   23.18
   3  -2   4  700.65   24.74
  -3   2  -4  640.46   22.81
   3  -2  -4  692.76   24.48
  -3  -2  -4  672.95   23.81
  -3  -2   4  646.65   23.00
   3  -2   4  699.59   25.40
  -3  -2  -4  671.62   23.83
   3   2  -4  657.87   23.62
  -3   2   4  682.01   24.38
  -3  -2  -4  683.32   24.30
  -3   2   4  673.60   23.97
  -3  -2  -4  673.96   23.96
   3  -2  -4  680.42   24.48
   3   2  -4  695.11   25.12
  -3  -2   4  679.40   24.42
  -3  -2   4  707.64   25.16
   3  -2   4  683.84   24.08
  -3  -2   4  662.60   23.65
  -3   2  -4  672.16   23.77
   3  -3   2 1234.62   43.34
  -3   3  -2 1164.30   41.24
  -3  -3  -2 1242.66   44.00
  -3  -3   2 1217.35   43.02
  -3   3   2 1205.58   42.93
   3   3  -2 1218.54   43.53
   3  -3  -2 1253.53   44.11
   3   3  -2 1236.61   43.84
  -3  -3   2 1202.50   43.57
   3  -3   2 1186.84   41.94
  -3  -3  -2 1148.80   40.54
  -3   3  -2 1218.06   42.85
  -3   3   2 1210.94   42.55
   3  -3   2 1249.61   43.97
   3  -3  -2 1171.54   41.22
  -3  -3   2 1238.92   43.61
  -3  -3  -2 1293.76   45.88
  -3  -3   2 1225.86   43.24
  -3   3  -2 1192.94   42.41
  -3   3   2 1226.50   43.05
   4  -1  -1  639.54   22.63
  -4  -1   1  623.14   22.37
  -4  -1  -1  588.89   21.27
  -4   1   1  600.30   21.80
   4   1  -1  624.28   22.36
   4  -1   1  604.00   21.58
   4   1  -1  601.95   21.44
  -4  -1  -1  569.31   20.22
   4  -1   1  615.19   21.83
  -4  -1   1  609.46   21.92
  -4   1   1  637.10   22.53
  -4   1  -1  629.39   22.24
   4  -1  -1  638.87   22.77
   4   1   1  633.80   22.45
  -4  -1   1  613.28   21.75
   2  -4   2   39.75    1.83
  -2  -4   2   40.76    1.99
   2   4   2   40.22    1.67
  -2  -4   2   40.78    1.77
   2   4  -2   39.99    1.76
  -2  -4  -2   38.30    1.67
  -2  -4   2   38.75    1.73
   2   4  -2   38.13    1.85
   2  -4  -2   35.72    1.55
  -2   4   2   38.45    1.76
  -2   4  -2   38.40    1.65
   2   4  -2   39.34    1.85
  -2  -4  -2   37.80    1.78
  -2  -4   2   38.79    1.68
  -2   4  -2   39.74    1.63
  -2   4   2   37.74    1.54
   2  -4   2   35.61    1.44
  -2  -4  -2   41.14    1.76
  -2   4  -2   37.47    1.59
  -2   4   2   38.75    1.62
   2  -4   2   41.45    1.69
   2  -4  -2   38.17    1.57
  -2  -4  -2   39.23    1.93
   4   0   2  108.47    4.08
   4   0  -2  101.44    4.12
  -4   0   2  102.77    4.15
  -4   0  -2  109.17    4.03
  -4   0   2  108.80    4.50
  -4   0   2  108.81    4.09
  -4   0  -2  100.74    3.83
   3  -1   5   70.78    2.95
   3   1  -5   82.56    3.48
  -3   1   5   73.45    2.98
  -3  -1  -5   75.34    2.93
   3  -1   5   72.98    2.84
   3  -1  -5   72.28    3.36
   3  -1  -5   73.33    2.87
  -3  -1   5   78.21    3.12
   3   1  -5   71.05    3.13
  -3   1   5   76.07    3.04
  -3  -1  -5   73.53    2.77
   3  -1   5   74.72    2.81
   3   1  -5   79.28    3.47
  -3   1  -5   73.38    3.10
  -3   1  -5   75.33    2.84
   3   1  -5   72.15    2.81
  -3  -1  -5   67.37    2.84
  -3   1  -5   74.23    2.85
  -3  -1  -5   72.33    2.91
  -3  -1   5   74.03    2.95
   3  -1  -5   71.11    3.33
   0   3   6    0.48    0.22
   0  -3   6    0.44    0.20
   0  -3  -6    1.33    0.21
   0  -3  -6    0.40    0.17
   0   3   6    0.63    0.16
   0  -3  -6    0.50    0.23
   0  -3   6    0.16    0.58
   0   3  -6    0.47    0.50
   0   3  -6    0.37    0.25
   0   3  -6    0.40    0.23
   1   4  -4  186.60    6.97
  -1  -4   4  187.55    6.94
   1  -4   4  191.57    6.96
  -1  -4  -4  193.34    7.03
   1  -4  -4  180.46    6.60
   1  -4  -4  194.58    7.10
   1  -4  -4  187.38    7.07
   1   4  -4  173.65    6.49
  -1  -4   4  181.90    6.63
  -1   4  -4  180.20    6.59
  -1  -4  -4  194.21    7.08
   1  -4   4  181.50    6.56
   1   4   4  188.05    6.96
  -1   4  -4  185.59    6.86
  -1  -4  -4  189.99    6.84
  -1  -4   4  186.03    7.21
  -1   4  -4  190.70    7.05
  -1  -4  -4  184.54    6.99
   0  -2  -7 1433.93   50.46
   0   2   7 1499.51   60.77
   0   2   7 1452.75   58.95
   0  -2  -7 1462.86   59.39
   0  -2   7 1358.91   47.99
   0   2  -7 1449.36   59.37
   0  -2   7 1504.41   61.10
   0   2  -7 1391.88   48.93
  -2  -2   6  723.78   25.85
   2  -2   6  702.26   25.25
   2   2  -6  727.98   26.20
  -2   2  -6  718.16   25.70
   2  -2  -6  712.56   25.53
  -2   2  -6  722.20   25.49
  -2  -2   6  673.36   24.22
  -2   2   6  753.95   26.70
  -2  -2  -6  727.17   25.76
   2  -2   6  729.15   25.73
  -2   2   6  710.90   25.12
   2  -2  -6  719.93   25.44
  -2  -2   6  724.11   25.68
   2  -2  -6  760.96   27.21
   2   2  -6  734.70   26.15
  -2   2   6  747.63   26.44
  -2  -2  -6  736.99   25.98
   2  -2   6  676.04   24.02
   2   2   6  686.57   24.18
   4   1  -2   69.92    3.06
  -4   1   2   72.46    3.31
   4  -1   2   71.61    3.18
  -4  -1  -2   68.89    2.62
   4  -1   2   72.99    2.83
  -4  -1  -2   70.71    2.80
  -4  -1   2   67.55    3.00
  -4  -1   2   70.00    2.76
  -4   1   2   70.92    2.75
  -4   1  -2   71.72    2.76
   2   3  -5  771.37   27.53
  -2   3  -5  726.86   25.90
   2  -3  -5  744.79   26.60
  -2  -3   5  731.97   26.46
   2   3  -5  708.34   25.32
  -2   3   5  700.27   24.95
  -2  -3  -5  740.50   26.06
  -2  -3   5  721.05   25.53
   2   3  -5  716.76   25.52
   2  -3   5  719.15   25.39
   2  -3   5  711.56   25.12
  -2   3   5  634.31   22.43
  -2  -3   5  723.23   25.62
  -2  -3   5  720.71   25.62
  -2   3   5  728.47   25.78
  -2   3  -5  741.40   26.28
  -2  -3  -5  713.75   25.26
   2  -3  -5  739.24   26.09
   2  -3   5  612.45   22.71
  -3  -3   3  321.94   12.11
   3   3  -3  320.75   11.84
  -3   3   3  328.70   11.74
   3  -3   3  335.81   11.98
   3  -3  -3  332.24   11.89
  -3  -3   3  330.35   11.88
   3  -3  -3  332.04   11.92
  -3   3  -3  311.53   11.22
  -3  -3  -3  328.12   11.79
  -3   3   3  346.10   12.58
  -3  -3   3  352.57   12.73
  -3   3   3  330.38   12.18
   3   3  -3  289.87   10.74
  -3   3  -3  334.28   11.91
   3  -3   3  325.01   11.56
   3  -3   3  319.36   11.73
   3   3  -3  333.27   12.16
  -3  -3   3  329.26   11.90
  -3  -3  -3  340.11   12.28
  -3   3  -3  333.20   11.91
  -3  -3  -3  295.00   11.60
  -3   3   3  334.73   11.90
   1  -3   6  146.40    5.34
   1  -3   6  148.11    5.92
   1   3  -6  151.68    5.88
   1  -3   6  148.20    5.46
   1   3  -6  156.19    5.83
   1  -3  -6  150.17    5.74
  -1  -3   6  146.93    5.43
   1  -3  -6  153.49    5.61
  -1   3   6  155.16    5.69
  -1   3  -6  142.96    5.50
  -1  -3  -6  151.23    5.55
  -1   3  -6  148.10    5.46
  -1  -3   6  150.87    5.99
  -1  -3   6  145.76    5.39
   1   3  -6  150.82    5.69
   1  -3  -6  154.08    5.80
   1   3   6  150.13    5.58
  -1  -3  -6  151.92    5.53
   0  -5   0   -0.10    0.18
   0   5   0    0.12    0.23
   0   5   0   -0.22    0.23
   0  -5   0   -0.04    0.15
   0   5   0   -0.04    0.21
   0  -5   0    0.27    0.34
  -2   4  -3   15.76    0.79
  -2   4   3   15.95    0.82
  -2   4  -3   14.47    0.78
  -2  -4  -3   15.72    0.83
   2   4  -3   15.79    0.97
  -2  -4   3   16.36    0.89
  -2   4   3   15.56    0.88
   2   4  -3   16.44    1.03
  -2  -4  -3   16.36    0.87
  -2   4  -3   15.60    0.87
   2   4  -3   17.48    0.99
  -2  -4   3   16.40    0.87
  -2  -4  -3   16.17    1.02
   2  -4   3   14.23    0.95
  -2  -4   3   16.72    1.23
   2  -4   3   15.12    0.71
   2  -4  -3   16.29    0.80
   2  -4   3   16.62    0.81
  -2   4   3   15.36    0.74
   4   0  -3  173.02    8.31
   4   0  -3  169.06    6.21
  -4   0   3  168.48    6.17
   4   0  -3  166.73    6.43
  -4   0   3  168.02    6.56
  -4   0  -3  167.26    6.06
  -4   0  -3  165.41    6.06
   4   0   3  171.02    6.27
  -4   0   3  163.05    6.26
  -1   2   7  128.40    4.72
  -1  -2  -7  132.54    4.87
   1  -2   7  132.48    4.93
  -1   2   7  130.92    4.83
   1  -2   7  129.27    4.73
   1   2   7  137.45    5.00
  -1   2  -7  130.94    4.84
   1  -2   7  132.94    4.93
   1  -2  -7  133.56    5.06
  -1  -2   7  129.80    5.11
  -1  -2  -7  129.85    4.79
  -1  -2   7  136.47    5.08
   1  -2   7  135.19    5.31
   1   2   7  127.94    4.78
   1  -2  -7  130.84    4.95
  -1   2  -7  137.34    5.47
   1  -2  -7  133.64    4.95
   1   2  -7  130.24    4.91
   1   2  -7  139.45    5.60
  -2   0  -7    4.08    0.34
   2   0   7    3.19    0.29
   2   0  -7    3.14    0.44
  -2   0  -7    3.32    0.61
  -2   0   7    2.88    0.34
   2   0  -7    3.31    0.42
   2   0  -7    4.04    0.45
  -2   0   7    3.11    0.33
   0   5  -1   21.37    1.18
   0   5   1   20.71    1.12
   0   5   1   19.08    1.01
   0   5  -1   22.35    1.28
   0  -5  -1   20.78    1.06
   0   5  -1   21.12    1.16
   0  -5   1   20.78    0.97
   0  -5   1   20.25    1.17
   0  -5  -1   21.41    0.98
   0  -5  -1   22.83    1.06
   0   5   1   21.07    1.23
   0   5  -1   21.31    1.04
   4   2   0 1434.31   58.24
   4  -2   0 1433.03   58.21
  -4  -2   0 1383.21   56.60
  -4   2   0 1442.79   58.70
  -4  -2   0 1439.47   58.47
  -4  -2   0 1379.90   56.52
   4  -2   0 1443.79   58.57
  -4  -2   0 1413.28   57.65
  -4   2   0 1394.99   56.60
  -4   2   0 1413.24   57.79
  -4  -2  -1  168.31    7.07
  -4  -2  -1  159.06    6.96
  -4  -2   1  167.29    7.03
   4  -2   1  166.55    6.97
  -4   2  -1  158.37    6.62
  -4   2   1  162.49    6.79
   4   2  -1  165.95    7.04
   4  -2  -1  160.14    6.73
  -4   2  -1  166.41    6.91
  -4   2   1  163.18    6.78
   4  -2  -1  167.81    7.02
  -4  -2   1  168.29    7.26
  -4  -2   1  160.70    7.02
  -4  -2  -1  167.06    7.39
  -4  -2  -1  156.24    6.85
  -4   2   1  167.52    7.26
   4  -2   1  155.82    6.70
  -4  -2   1  158.95    6.90
   0   0   8    4.29    0.35
   0   0  -8    4.12    0.63
   0   0  -8    4.28    0.39
   0   0  -8    4.35    0.42
   0   0   8    4.74    0.38
  -4  -1   3   18.52    1.01
   4  -1   3   18.70    1.20
   4   1  -3   17.56    1.32
  -4   1  -3   17.24    0.88
  -4   1  -3   17.76    0.95
   4   1  -3   19.96    1.45
   4  -1  -3   19.04    1.04
   4  -1   3   17.66    0.96
   4   1  -3   17.68    0.98
   4   1  -3   16.92    1.23
  -4   1   3   18.38    1.18
  -4   1   3   16.47    1.04
  -4  -1  -3   18.58    0.93
  -4  -1   3   18.63    1.14
  -4  -1  -3   18.17    1.00
  -4   1   3   17.86    0.96
  -4   1  -3   18.06    0.94
   0   4   5  270.21   11.20
   0  -4   5  292.99   12.13
   0  -4  -5  295.42   12.27
   0  -4  -5  294.10   12.13
   0  -4   5  305.73   13.06
   0   4  -5  290.85   12.17
   0  -4   5  288.56   11.87
   0  -4  -5  299.05   12.31
   0   4  -5  243.43   10.15
   0   4  -5  286.23   11.90
   3  -2  -5  167.56    7.26
   3  -2   5  177.34    7.34
  -3   2   5  175.68    7.44
  -3  -2  -5  175.39    7.26
  -3  -2   5  168.72    7.31
  -3   2  -5  166.39    6.92
  -3  -2  -5  171.78    7.25
  -3   2  -5  165.21    6.91
   3  -2   5  171.34    7.15
   3  -2  -5  168.51    7.05
   3   2  -5  181.00    7.96
   3   2  -5  164.40    7.10
  -3   2   5  173.62    7.37
  -3  -2   5  172.66    7.30
   3  -2   5  174.08    7.65
  -3  -2  -5  171.46    7.19
  -3   2  -5  169.66    7.23
   2  -1   7  154.10    6.70
   2   1  -7  156.33    6.69
  -2  -1  -7  162.14    6.97
  -2   1  -7  152.32    6.77
  -2  -1   7  156.57    6.58
   2   1   7  167.33    6.93
   2  -1  -7  159.43    6.85
   2   1  -7  151.86    6.49
  -2   1   7  156.86    6.59
  -2   1  -7  153.86    6.43
  -2  -1  -7  159.12    6.63
  -2  -1  -7  157.68    6.64
   2  -1  -7  156.78    6.59
  -2   1   7  154.26    6.46
  -2   1   7  160.75    6.80
   2   1  -7  156.89    6.84
   2  -1  -7  153.87    6.72
  -2  -1   7  161.04    6.77
  -2  -1  -7  160.41    6.71
  -1   5   0    0.46    0.23
  -1  -5   0    0.67    0.37
   1  -5   0    0.88    0.34
   1   5   0    0.60    0.30
  -1   5   0    1.99    0.32
  -1   5   0   -0.63    0.24
  -1  -5   0    0.36    0.20
  -1  -5   0    0.45    0.24
   1   5   0    0.60    0.31
  -1   5   0    0.62    0.25
   1   5   0    0.47    0.30
   1  -5   0    1.17    0.20
   0   5  -2  699.82   28.57
   0   5  -2  712.05   29.14
   0  -5  -2  697.76   28.43
   0  -5   2  694.12   28.30
   0  -5   2  584.18   23.86
   0  -5  -2  694.13   28.35
   0   5  -2  686.32   28.11
   0   5  -2  701.73   28.81
   0  -5  -2  713.13   29.13
   0   5   2  689.27   28.45
   0  -5   2  693.99   28.48
   3   0  -6 2117.34   83.68
  -3   0  -6 2056.96   83.31
  -3   0  -6 2054.52   83.29
  -3   0  -6 2151.78   85.37
   3   0   6 1824.95   73.99
   3   0  -6 2147.40   85.31
  -3   0  -6 2088.94   85.29
   3   0  -6 2247.02   89.65
   3   0  -6 2173.67   88.14
  -3   0   6 2148.80   84.92
  -3   0   6 1923.53   78.01
   1  -5  -1  345.68   14.27
  -1  -5   1  350.99   14.46
  -1  -5  -1  350.27   14.50
  -1  -5   1  344.24   14.33
   1  -5  -1  346.73   14.19
   1  -5   1  335.16   13.75
  -1  -5   1  348.76   14.36
  -1   5  -1  356.80   14.71
  -1  -5  -1  359.01   14.79
  -1   5   1  348.76   14.43
   1   5  -1  334.56   13.97
   1   5   1  353.91   14.92
   1  -5  -1  345.37   14.27
  -1  -5  -1  357.53   14.71
  -1   5   1  343.01   14.13
  -1   5  -1  363.77   15.00
  -1   5  -1  346.64   14.26
   1   5  -1  332.99   14.04
  -1   5   1  329.79   13.72
   1   5   1  357.78   14.70
   1   5  -1  289.33   11.97
   0   1   8  138.81    5.82
   0  -1   8  137.78    5.81
   0  -1   8  136.62    5.72
   0  -1  -8  135.04    5.71
   0   1   8  132.53    5.54
   0   1  -8  136.96    5.80
   0   1  -8  134.74    6.05
   0  -1  -8  135.44    5.90
   0  -1  -8  136.40    5.78
  -4   2   2  204.64    9.04
   4   2  -2  204.11    8.68
   4  -2   2  193.73    8.28
   4  -2  -2  209.56    8.73
  -4  -2   2  207.36    8.81
  -4   2   2  206.77    8.82
  -4  -2  -2  197.48    8.50
  -4  -2   2  196.01    8.34
   4  -2   2  205.91    8.56
  -4  -2   2  203.53    8.51
  -4  -2  -2  200.35    8.42
  -4  -2  -2  178.13    7.82
  -4   2   2  178.80    7.47
   4   2  -2  183.54    8.03
  -4  -2   2  204.65    8.74
  -4   2  -2  208.28    8.60
  -4   2  -2  195.44    8.11
  -4   2   2  202.16    8.41
   1   0  -8  399.20   16.61
  -1   0  -8  417.50   17.40
  -1   0   8  405.04   16.60
   1   0  -8  381.68   15.74
   1   0   8  389.28   15.97
  -1   0   8  423.61   17.33
   1   0   8  430.00   17.55
   1   0  -8  408.78   16.89
   1   0  -8  407.50   16.78
  -1   0  -8  424.35   17.39
  -1   4   5  144.95    6.10
   1  -4   5  143.34    6.02
   1   4   5  140.17    5.97
  -1  -4  -5  140.51    5.91
  -1   4  -5  147.16    6.31
  -1  -4   5  150.63    6.40
   1  -4   5  115.29    5.28
   1   4  -5  137.68    5.96
  -1   4  -5  139.06    5.87
   1  -4  -5  143.23    6.20
  -1  -4  -5  148.80    6.27
  -1   4  -5  143.25    6.15
  -1  -4   5  140.84    6.34
   1  -4   5  148.67    6.19
  -1  -4   5  140.94    5.93
  -1  -4  -5  144.32    6.01
  -1  -4  -5  151.85    6.68
   1  -4  -5  144.36    6.04
   3   3  -4  318.38   13.36
  -3   3   4  338.94   14.14
   3  -3   4  309.88   13.13
   3  -3   4  337.03   13.79
   3  -3  -4  339.60   14.39
  -3   3   4  329.53   13.53
  -3  -3  -4  336.64   13.87
   3   3  -4  354.19   14.86
  -3   3   4  334.89   13.92
   3   3  -4  331.96   13.97
  -3   3  -4  340.81   13.99
  -3   3  -4  331.95   13.72
   3  -3  -4  342.11   14.08
  -3  -3   4  335.52   14.32
  -3  -3  -4  352.93   14.58
  -3   3  -4  333.50   13.72
  -3  -3   4  282.89   11.73
  -3  -3  -4  327.81   13.48
  -3  -3   4  338.78   14.04
  -3  -3   4  314.54   13.05
   3  -3   4  346.11   14.20
   3  -1  -6  733.73   29.93
   3  -1  -6  691.48   30.51
  -3   1  -6  716.26   29.55
   3   1  -6  785.29   32.63
  -3  -1  -6  703.81   28.93
   3  -1   6  730.34   29.96
   3   1  -6  727.58   31.52
   3   1   6  736.05   29.97
   3  -1   6  720.40   29.30
  -3  -1  -6  743.79   30.25
  -3  -1   6  755.27   30.83
  -3   1   6  723.82   29.59
   3   1  -6  709.21   29.53
   3  -1  -6  797.20   32.68
  -3  -1  -6  732.41   29.88
  -3   1  -6  709.36   28.91
  -3   1   6  721.31   29.37
  -3  -1   6  740.59   30.19
  -3   1  -6  741.48   30.14
  -3  -1   6  743.48   30.49
  -3  -1  -6  711.31   29.06
   3   1  -6  744.46   30.37
   3  -1  -6  749.08   32.03
  -3   1   6  748.72   30.69
   2  -4  -4  815.12   33.63
  -2   4   4  860.61   35.12
   2   4  -4  847.60   35.04
  -2  -4  -4  813.82   33.18
  -2  -4   4  848.20   35.07
   2  -4   4  780.46   32.12
  -2  -4   4  813.60   33.16
  -2   4  -4  803.05   32.81
  -2  -4  -4  800.22   32.61
  -2   4   4  847.29   34.59
  -2   4  -4  814.26   33.31
  -2  -4  -4  805.93   33.11
   2  -4  -4  822.43   33.45
   2  -4   4  857.61   34.88
  -2   4   4  754.59   30.69
   2  -4   4  791.14   32.17
  -2  -4   4  832.20   33.95
  -2   4  -4  821.94   33.51
  -2  -4   4  677.48   27.79
   2   4  -4  846.67   34.58
  -2  -4  -4  816.20   33.16
   4   0  -4    0.35    0.33
   4   0   4    0.25    0.24
  -4   0   4    0.13    0.27
  -4   0  -4    0.36    0.23
  -4   0   4    0.15    0.32
   4   0  -4   -0.13    0.41
  -4   0  -4    0.40    0.26
  -4   0   4    0.22    0.30
  -4   0  -4    0.56    0.20
   4   0  -4    0.39    0.41
   4   0  -4    0.07    0.42
  -1  -5  -2  432.17   17.84
  -1   5   2  388.18   16.06
  -1  -5   2  388.46   15.95
  -1   5  -2  401.32   16.49
  -1   5   2  395.53   16.26
   1  -5  -2  381.26   15.81
   1  -5   2  413.63   16.95
   1   5   2  372.91   15.73
  -1   5  -2  414.05   17.00
  -1  -5   2  414.67   17.24
   1  -5  -2  396.09   16.22
   1  -5   2  395.33   16.17
   1   5   2  424.83   17.41
  -1  -5  -2  410.24   16.85
   1   5  -2  403.16   16.78
   1  -5  -2  406.98   16.67
   1   5  -2  393.38   16.29
  -1   5  -2  411.82   16.97
  -1  -5  -2  395.65   16.31
  -1  -5  -2  413.04   17.00
   3   4   0  239.66    9.95
   3  -4   0  236.03    9.85
  -3  -4   0  242.08   10.24
   3  -4   0  229.27    9.44
  -3  -4   0  243.97   10.24
  -3   4   0  239.82    9.88
   3   4   0  233.25   10.05
   3  -4   0  238.80    9.88
  -3   4   0  231.82    9.61
  -3  -4   0  232.21    9.73
  -3  -4   0  252.46   10.65
  -3   4   0  241.32   10.31
  -1   1  -8   19.76    1.42
  -1   1  -8   20.65    1.06
  -1   1   8   20.01    1.01
   1  -1   8   21.44    1.08
  -1  -1   8   22.07    1.13
   1  -1  -8   22.43    1.16
   1   1  -8   21.50    1.48
  -1  -1  -8   21.20    1.10
   1  -1  -8   22.51    1.20
   1   1  -8   22.79    1.22
   1  -1  -8   20.74    1.15
  -1  -1   8   21.89    1.09
   1  -1   8   22.29    1.08
   1   1   8   20.72    1.01
   1  -1  -8   21.36    1.26
  -1   1   8   22.21    1.10
  -1  -1  -8   20.34    1.22
   1   1  -8   21.70    1.18
  -1  -1  -8   21.12    1.06
  -3  -4   1    6.37    0.78
  -3  -4  -1    6.53    0.65
  -3   4   1    5.43    0.57
  -3   4  -1    6.31    0.49
   3  -4   1    6.37    0.43
  -3   4   1    6.54    0.43
  -3  -4  -1    6.66    0.64
   3   4   1    7.68    0.54
  -3   4  -1    6.39    0.49
  -3  -4  -1    6.26    0.55
  -3  -4   1    9.65    0.71
  -3  -4  -1    6.96    0.65
   3   4  -1    5.42    0.68
   3  -4   1    6.06    0.57
  -3  -4   1    6.04    0.56
  -3  -4   1    5.71    0.54
  -3   4  -1    6.79    0.46
   3   4  -1    6.22    0.52
   3  -4  -1    7.37    0.58
  -3   4   1    6.75    0.49
   3  -4   1    8.36    0.55
   0   5  -3  114.35    4.98
   0  -5  -3  118.66    5.07
   0  -5   3  116.32    4.91
   0   5  -3  117.08    5.07
   0  -5  -3  114.88    4.85
   0   5  -3  119.32    5.14
   0  -5   3  109.54    4.91
   0  -5   3  118.66    5.04
   0  -5  -3  113.61    4.82
   0   5  -3  119.44    5.12
   0  -3  -7    5.39    0.43
   0  -3  -7    5.63    0.47
   0   3  -7    6.53    0.51
   0  -3   7    5.18    0.44
   0  -3   7    5.64    0.42
   0   3  -7    5.45    0.48
   0   3   7    5.49    0.43
   0  -3   7    5.62    0.48
   0  -3  -7    5.48    0.41
   0   3   7    5.71    0.39
   0   3  -7    6.33    0.82
  -4  -1  -4  131.06    5.48
  -4   1  -4  127.30    5.32
  -4  -1   4  125.92    5.35
  -4   1   4  131.19    5.80
   4  -1   4  129.36    5.63
   4   1  -4  131.19    5.98
  -4  -1  -4  126.43    5.37
  -4   1  -4  120.99    5.19
   4   1  -4  133.33    5.64
   4  -1  -4  129.95    6.28
   4   1  -4  123.21    6.15
  -4  -1   4  130.77    5.72
  -4   1  -4  127.97    5.39
  -4  -1  -4  127.37    5.75
   4   1  -4  130.18    5.90
   4  -1   4  125.81    5.34
  -4   1   4  129.96    5.49
   4  -1  -4  130.49    5.53
  -4  -1   4  126.33    5.49
  -4  -1  -4  129.45    5.49
  -4   1   4  129.24    5.69
   2   3  -6  122.90    5.48
  -2  -3   6  126.24    5.37
   2  -3   6  126.39    5.32
  -2   3   6  125.26    5.36
   2  -3  -6  122.25    5.16
   2  -3   6  122.31    5.59
   2   3  -6  116.32    5.22
  -2   3  -6  121.44    5.25
  -2  -3  -6  124.29    5.26
  -2   3   6  122.54    5.20
  -2  -3  -6  120.18    5.04
   2  -3  -6  122.21    5.38
   2  -3   6  120.45    5.05
  -2   3   6  126.13    5.34
  -2  -3   6  123.81    5.25
  -2  -3   6  129.55    5.83
   2   3  -6  124.65    5.41
  -2   3  -6  123.55    5.39
  -4   2   3   33.99    1.56
   4  -2   3   34.43    1.60
  -4  -2   3   33.98    1.65
  -4  -2   3   34.11    1.73
   4  -2   3   34.64    1.94
  -4   2  -3   32.97    1.58
   4   2  -3   34.71    1.93
   4  -2  -3   34.46    1.64
   4   2  -3   33.93    1.85
  -4  -2  -3   34.10    1.69
  -4  -2   3   34.99    1.76
  -4   2   3   32.95    1.70
  -4  -2  -3   32.40    1.46
  -4  -2   3   34.02    1.76
  -4  -2  -3   35.46    1.69
  -4   2   3   34.80    1.84
  -4   2  -3   34.16    1.56
   2  -2  -7   55.55    2.43
   2  -2   7   55.78    2.69
  -2  -2   7   56.54    2.69
  -2  -2   7   57.97    2.56
   2  -2  -7   60.13    2.81
   2   2  -7   60.56    2.74
  -2   2   7   60.87    2.64
  -2   2  -7   60.54    2.60
   2   2  -7   49.01    2.58
  -2   2  -7   57.55    2.81
   2  -2  -7   60.26    2.77
   2  -2   7   59.30    2.51
  -2  -2  -7   60.32    2.59
  -2  -2  -7   56.54    2.42
  -2   2   7   57.92    2.50
   2   2   7   61.58    2.60
  -3  -4   2  589.53   23.90
  -3  -4  -2  601.85   24.01
  -3   4  -2  588.23   23.39
   3  -4   2  582.87   23.10
  -3  -4  -2  571.25   22.85
  -3  -4   2  572.31   22.91
  -3   4   2  583.31   23.39
   3   4  -2  589.01   23.48
   3  -4   2  554.27   22.30
  -3   4  -2  572.37   22.78
   3   4  -2  566.47   22.93
   3  -4   2  579.36   23.00
  -3   4   2  600.24   23.84
   3  -4  -2  579.49   23.10
  -3  -4  -2  577.48   23.21
   3   4  -2  508.77   21.24
  -3  -4  -2  580.70   23.43
  -3   4   2  590.45   23.75
  -3  -4   2  584.34   23.36
  -3   4  -2  547.93   21.77
  -1  -5  -3 1543.69   53.75
   1   5   3 1440.77   57.53
   1  -5  -3 1566.85   54.47
  -1   5  -3 1505.21   52.45
  -1  -5  -3 1420.82   56.30
   1   5  -3 1530.73   53.59
  -1  -5   3 1520.22   53.23
   1  -5   3 1514.81   52.71
  -1  -5  -3 1543.44   53.70
  -1  -5   3 1425.92   57.40
  -1  -5  -3 1440.40   57.28
   1   5  -3 1543.09   53.94
   1  -5  -3 1533.17   53.39
  -1   5  -3 1468.96   58.11
   1  -5   3 1565.43   54.41
  -1  -5   3 1389.91   55.01
  -1   5  -3 1534.46   53.57
   0   2   8   11.57    0.62
   0  -2  -8   11.02    0.72
   0   2   8   11.26    0.66
   0   2  -8   10.85    1.15
   0  -2  -8   11.23    0.67
   0  -2   8   11.57    0.72
   0   2  -8   11.05    0.69
   0  -2  -8   10.86    0.66
  -1   3  -7  123.71    5.35
  -1  -3   7  114.93    4.79
   1  -3   7  112.39    5.06
  -1  -3  -7  116.90    4.81
   1   3  -7  116.48    5.13
   1   3   7  117.80    4.81
   1   3  -7  118.34    5.04
  -1   3  -7  117.68    4.88
   1  -3  -7  122.14    5.03
   1   3  -7  122.11    5.13
  -1  -3   7  116.22    4.80
  -1  -3  -7  117.44    4.83
   1  -3   7  121.68    4.97
  -1   3   7  118.85    4.85
   1  -3   7  116.30    4.82
  -1  -3   7  127.03    5.61
   1   3   7  121.58    5.08
   1  -3  -7  118.30    5.05
  -1   3   7  115.28    4.87
   1  -3  -7  115.53    4.91
  -2   5   0   11.54    0.71
  -2   5   0   10.55    0.84
   2   5   0   11.59    0.93
  -2  -5   0   10.83    0.70
  -2   5   0   11.76    0.68
  -2  -5   0   12.46    0.78
  -2  -5   0   12.38    0.89
  -2  -5   0   12.46    0.81
   2  -5   0   11.21    0.78
   2   5   0   11.19    0.70
   2  -5   0   11.16    0.61
  -2   5   0   11.47    0.70
  -4  -3   0  514.22   20.83
  -4   3   0  524.07   20.83
   4   3   0  545.68   21.73
  -4   3   0  526.08   20.87
   4  -3   0  518.11   20.71
  -4  -3   0  538.94   21.95
  -4  -3   0  531.72   21.40
  -4  -3   0  532.62   21.25
   4  -3   0  555.89   22.10
  -4   3   0  535.75   21.62
   0  -4   6    9.46    0.57
   0  -4   6    9.77    1.07
   0  -4  -6    9.82    0.90
   0   4   6    8.21    0.56
   0  -4  -6    9.21    0.63
   0  -4  -6    9.07    0.63
   0   4  -6    8.99    0.63
   0  -4   6   10.09    0.66
   0  -4  -6    9.52    0.58
   0   4  -6    9.06    0.80
   3  -2   6  455.53   18.10
   3   2  -6  431.70   17.49
  -3  -2   6  444.95   17.80
  -3  -2  -6  457.31   18.26
   3  -2  -6  444.72   18.11
  -3  -2   6  460.86   18.46
  -3   2   6  443.59   17.77
  -3   2  -6  441.94   17.70
  -3  -2  -6  463.28   18.42
   3  -2  -6  429.52   17.23
  -3   2   6  460.45   18.47
   3  -2  -6  460.76   18.68
  -3   2  -6  453.21   18.28
   3   2  -6  488.87   20.02
   3  -2   6  448.80   18.25
  -3  -2   6  450.64   18.19
  -3   2   6  427.44   17.04
  -3   2  -6  458.25   18.30
  -3  -2  -6  433.16   17.31
   3  -2   6  428.54   17.16
   2  -5   1   19.72    1.14
   2   5  -1   20.43    1.08
  -2  -5  -1   21.45    1.22
  -2   5   1   20.70    1.04
  -2  -5   1   20.30    1.08
  -2  -5  -1   19.65    1.08
   2   5   1   21.13    1.36
   2  -5   1   20.82    1.03
  -2   5  -1   21.22    1.09
  -2  -5  -1   20.68    1.09
  -2  -5   1   21.94    1.17
   2   5   1   21.76    1.10
  -2   5   1   20.59    1.21
   2   5  -1   20.57    1.27
   2  -5  -1   19.35    1.07
  -2   5  -1   20.27    1.02
  -2   5   1   19.62    1.02
   2  -5   1   20.62    0.98
  -2  -5   1   20.97    1.12
  -2  -5   1   21.76    1.28
   2  -5  -1   21.01    1.00
  -2  -5  -1   20.94    1.18
  -2   5  -1   20.60    1.06
  -4   3   1  430.85   17.17
  -4  -3  -1  428.11   17.40
  -4  -3   1  402.75   16.32
  -4   3   1  433.46   17.25
  -4  -3   1  445.98   18.22
  -4   3  -1  422.25   16.84
  -4  -3  -1  425.89   17.31
   4  -3   1  414.68   16.68
   4   3  -1  426.94   17.10
   4  -3  -1  431.71   17.27
   4   3   1  418.93   16.75
  -4   3   1  439.58   17.81
  -4  -3   1  431.23   17.40
  -4  -3  -1  423.13   17.18
  -4   3  -1  418.23   16.65
   4  -3   1  449.07   17.90
   4  -3  -1  435.67   17.37
  -4  -3   1  438.39   17.53
  -4  -3  -1  425.40   17.04
  -3  -3   5   97.12    4.43
  -3   3  -5   95.49    4.02
  -3  -3   5   96.68    4.10
  -3   3   5   97.17    4.17
   3   3  -5   97.88    4.31
  -3  -3  -5   94.16    3.99
   3  -3   5   99.03    4.11
  -3   3   5   98.44    4.22
   3  -3   5   97.07    3.99
   3  -3  -5   90.45    3.81
  -3  -3   5   96.63    4.12
   3  -3   5   97.42    4.50
   3   3  -5   98.71    4.39
  -3   3  -5   96.19    4.13
  -3  -3  -5   94.78    3.99
   3  -3  -5   98.60    4.40
  -3  -3  -5   96.84    3.99
   3   3  -5   98.43    4.33
   1  -2  -8  625.57   24.99
  -1   2  -8  640.26   25.87
   1   2  -8  644.26   26.13
   1  -2   8  613.21   24.58
  -1  -2   8  635.28   25.52
  -1   2   8  629.90   25.01
  -1  -2  -8  633.94   25.15
  -1   2  -8  646.11   25.66
   1  -2  -8  610.02   24.37
  -1  -2   8  631.12   25.08
  -1   2   8  599.69   23.86
  -1  -2   8  523.13   20.97
   1   2   8  657.37   26.03
   1  -2   8  632.17   25.15
   1   2  -8  641.24   25.54
   1   2   8  604.73   24.10
   1  -2   8  641.75   25.55
   1  -2  -8  637.76   25.35
  -1  -2  -8  648.21   25.73
  -2   0   8   83.81    3.53
   2   0  -8   79.56    3.40
   2   0  -8   84.10    3.72
   2   0  -8   76.57    3.38
  -2   0   8   78.92    3.34
  -2   0  -8   80.51    3.38
   2   0   8   80.87    3.36
  -2   0  -8   77.26    3.61
   0   5   4  111.19    4.66
   0  -5  -4  107.57    4.74
   0  -5   4  110.29    4.56
   0   5  -4  109.13    4.62
   0  -5  -4  112.32    4.65
   0  -5   4  107.69    4.49
   0  -5  -4  111.73    4.67
   0   5  -4  112.53    4.75
   0  -5   4  105.92    4.71
   0   5  -4  109.60    4.62
  -2  -4   5   85.67    3.64
  -2  -4  -5   84.50    3.88
  -2  -4   5   86.03    3.65
  -2   4  -5   87.11    3.66
   2  -4   5   84.19    3.49
  -2  -4   5   88.96    4.18
   2  -4  -5   86.75    3.63
   2  -4   5   87.52    3.67
  -2   4   5   71.21    3.04
  -2   4  -5   87.99    3.78
  -2  -4  -5   84.84    3.58
  -2   4   5   87.90    3.76
   2   4  -5   85.66    3.78
   2  -4  -5   85.07    3.84
  -2  -4  -5   82.46    3.50
  -2   4  -5   76.95    3.47
   2   4  -5   86.83    3.82
   2  -4   5   85.46    3.97
  -2  -4  -5   87.00    3.60
   4   0  -5    0.03    0.51
  -4   0   5    1.66    0.35
  -4   0  -5    0.29    0.36
   4   0  -5    0.33    0.31
  -4   0   5   -0.09    0.29
  -4   0  -5    0.40    0.21
  -4   0  -5    0.73    0.22
   4   0  -5   -0.07    0.49
   4   0  -5    0.67    0.41
  -3   4   3   69.91    2.99
  -3  -4  -3   70.92    3.28
   3  -4   3   73.20    3.09
   3  -4  -3   73.14    3.11
  -3  -4   3   70.22    3.08
   3  -4   3   74.04    3.09
  -3   4  -3   69.61    2.94
  -3   4   3   69.77    2.92
   3  -4   3   66.76    3.06
   3   4  -3   73.84    3.25
  -3  -4  -3   73.32    3.19
   3   4  -3   77.60    3.59
   3  -4  -3   72.50    3.12
  -3  -4   3   72.62    3.14
  -3   4  -3   71.29    3.08
   3   4  -3   65.38    3.06
  -3  -4   3   72.03    3.50
  -3   4   3   71.33    3.20
  -3   4  -3   72.51    3.10
  -3  -4  -3   70.11    3.06
  -3   4   3   71.12    3.32
  -3  -4   3   71.20    3.14
  -4  -2  -4   96.52    4.08
  -4   2  -4   92.47    3.92
  -4   2   4   92.40    4.07
  -4   2   4   98.95    4.29
  -4  -2   4   94.52    4.10
   4  -2  -4   95.57    4.34
   4  -2  -4   95.54    4.02
  -4   2  -4   98.23    4.09
  -4   2   4   96.76    4.04
   4  -2   4   96.64    4.05
  -4  -2   4   97.68    4.12
  -4  -2   4   90.05    4.01
  -4  -2  -4   98.29    4.15
   4  -2   4   91.57    3.78
   4   2  -4   95.83    4.32
  -4  -2  -4   96.32    3.98
  -4  -2   4   76.07    3.48
   4   2  -4   97.92    4.41
   4  -2   4   96.06    4.42
   3   0  -7    2.96    0.53
  -3   0  -7    2.90    0.32
  -3   0   7    2.70    0.34
   3   0  -7    2.33    0.46
  -3   0   7    2.33    0.33
  -3   0  -7    2.45    0.69
   3   0  -7    2.46    0.37
   3   0   7    2.89    0.29
   3   0  -7    1.80    0.53
  -1  -4   6   73.04    3.10
   1  -4  -6   73.37    3.28
  -1  -4  -6   78.14    3.26
   1  -4  -6   73.96    3.13
  -1  -4  -6   78.59    3.31
   1   4  -6   74.22    3.34
  -1   4  -6   79.09    3.50
   1  -4   6   74.10    3.11
   1  -4   6   73.76    3.14
  -1  -4   6   75.10    3.62
   1  -4   6   73.07    3.53
   1   4  -6   75.99    3.35
  -1   4   6   76.68    3.26
  -1  -4   6   72.26    3.16
   1   4   6   75.32    3.27
  -2   5   2  706.85   28.25
  -2  -5  -2  686.77   27.54
   2   5  -2  689.93   27.78
   2   5   2  698.54   27.73
  -2   5  -2  681.32   27.08
   2  -5  -2  569.82   22.75
   2   5  -2  722.01   28.70
  -2  -5  -2  676.47   26.93
   2  -5   2  692.25   27.63
  -2  -5   2  681.90   27.35
   2  -5   2  650.24   25.75
  -2   5  -2  657.48   26.12
  -2  -5   2  656.44   26.16
  -2  -5  -2  698.82   27.93
   2   5  -2  653.31   26.23
   2  -5  -2  678.58   26.90
   2  -5   2  696.08   27.59
  -2   5   2  646.65   25.73
  -2   5  -2  670.15   26.63
  -2  -5   2  681.42   27.16
  -2  -5  -2  669.80   26.62
  -2   5   2  633.87   25.22
  -2  -5   2  665.93   26.57
   4   3  -2  291.73   11.81
  -4   3   2  296.46   12.13
  -4  -3  -2  281.89   11.65
  -4   3  -2  262.36   10.62
   4  -3  -2  284.90   11.52
  -4   3   2  298.70   11.97
   4  -3   2  297.33   12.12
  -4  -3  -2  294.19   12.02
  -4   3  -2  299.02   11.99
  -4  -3   2  290.00   12.09
  -4   3   2  281.61   11.36
  -4   3  -2  289.73   11.59
  -4  -3   2  284.81   11.49
  -4  -3   2  278.15   11.36
  -4  -3  -2  291.40   11.73
   4  -3   2  307.16   12.32
  -4  -3  -2  282.77   11.71
  -4   3   2  286.81   11.87
  -4  -3   2  297.07   12.10
   2   1  -8  261.12   10.72
  -2   1   8  269.52   10.83
  -2   1  -8  269.41   11.26
   2   1  -8  274.82   11.19
  -2  -1  -8  261.71   10.51
  -2   1   8  280.15   11.27
   2  -1   8  263.25   10.54
   2   1  -8  263.51   10.64
  -2  -1   8  281.35   11.33
   2  -1  -8  268.96   10.99
  -2  -1  -8  271.03   11.13
  -2   1  -8  284.52   11.45
   2  -1  -8  274.99   11.09
   2  -1  -8  285.36   11.64
  -2  -1   8  256.11   10.35
   2   1   8  276.84   11.07
   4  -1  -5  158.31    6.65
   4  -1   5  135.83    5.52
  -4   1  -5  152.41    5.52
  -4  -1  -5  150.72    6.55
   4   1  -5  156.51    6.44
   4  -1  -5  148.75    6.11
   4  -1   5  147.92    6.10
  -4  -1   5  137.09    5.66
  -4   1   5  147.75    6.05
  -4   1   5  145.28    6.12
  -4  -1  -5  151.89    6.24
  -4   1   5  152.90    6.48
  -4  -1   5  147.02    6.14
  -4   1  -5  146.82    5.96
  -4  -1  -5  146.49    5.95
  -4  -1   5  141.01    6.01
  -4   1  -5  144.81    6.06
   4   1  -5  144.78    6.27
   4   1  -5  148.02    6.67
   4  -1  -5  151.81    7.04
   4   1  -5  156.99    6.84
   1  -5  -4  342.98   12.19
  -1  -5  -4  340.86   12.10
   1   5  -4  323.59   11.70
  -1   5  -4  326.55   11.77
  -1   5  -4  329.95   11.73
   1  -5   4  346.57   12.27
  -1  -5  -4  328.33   11.67
  -1  -5  -4  347.47   12.22
   1  -5   4  332.51   11.73
  -1  -5   4  340.73   12.13
   1   5   4  331.43   11.86
  -1   5  -4  327.59   11.78
   1  -5  -4  318.88   11.71
  -1  -5   4  323.66   11.46
  -1  -5  -4  333.08   11.92
  -1  -5   4  326.59   11.98
   1   5  -4  341.99   12.25
   1  -5  -4  321.25   11.44
   0   0   9   -0.00    0.17
   0   0  -9    0.28    0.55
   0   0   9    0.14    0.17
   0   0  -9    0.03    0.28
   0   0  -9    0.24    0.24
   0   0  -9    0.18    0.22
  -3  -1  -7   60.62    2.31
   3  -1  -7   57.09    2.28
   3  -1  -7   63.28    2.69
  -3  -1  -7   55.77    2.45
   3  -1  -7   59.94    2.53
   3   1   7   60.74    2.30
  -3   1  -7   59.38    2.70
   3   1  -7   60.18    2.38
   3  -1  -7   63.24    2.72
  -3  -1   7   58.69    2.33
  -3  -1  -7   58.99    2.31
  -3   1   7   61.48    2.39
  -3  -1  -7   59.30    2.31
   3   1  -7   61.04    2.83
  -3  -1   7   59.20    2.39
  -3   1   7   60.38    2.43
   3   1  -7   57.47    2.59
   3   1  -7   57.16    2.49
  -3   1   7   59.42    2.36
  -3  -1   7   57.47    2.32
  -3   1  -7   58.95    2.26
   5   0   0   -0.01    0.29
  -5   0   0    0.22    0.31
  -5   0   0   -0.20    0.39
  -5   0  -1   30.99    1.34
  -5   0   1   34.05    1.69
  -5   0  -1   33.75    1.72
   5   0  -1   33.46    1.46
   5   0   1   35.48    1.52
  -5   0   1   31.56    1.64
  -5   0   1   33.33    1.44
   0   1  -9   56.39    2.25
   0  -1  -9   57.47    2.29
   0   1   9   56.30    2.20
   0  -1  -9   57.50    2.28
   0  -1   9   57.86    2.22
   0   1   9   57.97    2.21
   0   1  -9   60.13    2.77
   0  -1  -9   57.61    2.48
   0  -1  -9   53.77    2.21
   0   1  -9   55.90    2.28
   0  -1   9   55.16    2.17
   2   5  -3  532.67   18.95
  -2   5  -3  546.61   19.25
   2  -5   3  556.28   19.50
  -2  -5   3  564.83   20.25
  -2   5   3  556.10   19.84
   2  -5   3  572.27   20.35
   2   5  -3  538.64   19.05
  -2  -5   3  524.54   18.50
  -2   5   3  526.26   18.54
  -2  -5  -3  533.90   18.78
  -2  -5  -3  551.82   19.45
   2  -5  -3  551.75   19.33
  -2  -5  -3  519.60   18.71
   2   5  -3  553.66   19.78
  -2  -5   3  522.60   18.44
  -2   5  -3  530.95   18.84
  -2   5   3  519.40   18.29
  -2   5  -3  549.48   19.31
  -2   5   3  574.99   20.32
   2  -5   3  537.54   18.81
  -2  -5  -3  500.28   17.88
  -4   3   3  367.78   12.98
  -4   3  -3  326.90   11.77
  -4  -3  -3  363.90   13.01
   4  -3   3  375.60   13.26
   4  -3  -3  328.73   11.67
  -4  -3   3  372.34   13.22
  -4  -3  -3  359.69   12.75
  -4  -3  -3  335.24   12.30
   4  -3  -3  371.82   13.20
   4   3  -3  374.49   13.66
  -4  -3   3  362.78   12.96
  -4  -3  -3  344.62   12.35
  -4   3  -3  378.18   13.35
  -4   3   3  373.42   13.41
  -4  -3   3  374.55   13.42
   4   3  -3  364.99   13.33
   4   3  -3  368.08   13.23
   4  -3   3  365.03   13.26
  -4  -3   3  337.86   12.54
   4  -3   3  343.11   12.07
  -4   3   3  380.24   13.37
  -4   3  -3  368.68   12.97
  -4   3   3  371.24   13.47
   1   0  -9  498.05   17.57
  -1   0   9  501.70   17.65
  -1   0  -9  511.13   18.33
   1   0  -9  502.26   17.75
  -1   0  -9  490.83   17.28
  -1   0   9  516.55   18.12
   1   0  -9  519.07   18.58
   1   0   9  495.78   17.44
   1   0   9  508.27   17.82
   1   0  -9  494.39   17.73
   2  -3   7   22.75    1.45
  -2   3  -7   22.23    1.24
   2  -3  -7   24.52    1.28
   2   3  -7   24.24    1.23
   2  -3  -7   25.04    1.40
   2  -3   7   23.44    1.00
  -2  -3   7   23.06    1.06
   2  -3  -7   21.67    1.02
  -2   3   7   24.13    1.08
   2  -3   7   24.55    1.09
  -2  -3  -7   23.59    1.02
   2   3  -7   22.31    1.18
  -2   3  -7   24.73    1.11
  -2  -3  -7   23.76    1.06
  -2  -3   7   22.92    1.39
  -2   3   7   24.78    1.10
   2   3  -7   21.81    1.39
  -2  -3   7   24.93    1.17
  -5  -1   0   18.50    1.18
  -5   1   0   17.76    0.82
  -5  -1   0   18.76    0.96
  -5   1   0   19.20    0.93
   5  -1   0   19.13    0.95
   5   1   0   17.90    0.89
   5  -1   0   17.16    0.90
  -5  -1   0   18.76    1.14
  -3   4  -4  622.12   21.88
   3   4  -4  659.90   23.12
   3  -4   4  630.71   22.71
  -3  -4   4  627.27   22.54
   3  -4   4  586.03   20.64
  -3   4   4  639.46   22.22
  -3   4  -4  623.21   21.80
  -3  -4   4  622.78   21.95
  -3   4   4  646.12   22.75
  -3  -4  -4  621.93   22.22
   3  -4  -4  626.91   22.11
  -3  -4  -4  642.36   22.45
  -3  -4  -4  623.87   21.96
   3  -4   4  645.42   22.40
  -3   4   4  618.76   21.69
  -3  -4  -4  647.01   22.44
  -3   4  -4  616.79   21.65
  -3  -4   4  631.58   22.23
  -3   4   4  667.36   23.33
   3   4  -4  643.47   22.71
   3  -4  -4  651.06   23.03
   5   1  -1  257.93    9.23
  -5  -1   1  254.20    9.10
   5  -1  -1  249.54    8.94
  -5  -1  -1  245.36    8.79
   5  -1   1  254.38    9.10
  -5   1  -1  253.55    9.04
   5  -1   1  221.86    8.29
  -5   1   1  242.74    8.70
   5   1   1  256.49    9.16
  -5  -1   1  255.38    9.38
  -5  -1  -1  254.69    9.42
   5  -1  -1  246.67    9.40
   5  -1   1  234.72    8.60
   5  -1  -1  253.41    9.24
  -5  -1  -1  238.62    8.90
  -5   1   1  260.16    9.63
  -5   1  -1  240.22    8.52
   0  -3   8   72.10    2.80
   0  -3   8   66.20    2.52
   0  -3  -8   70.51    2.73
   0  -3  -8   70.46    2.69
   0   3   8   69.86    2.70
   0   3  -8   72.66    2.83
   0  -3   8   68.62    2.72
   0   3  -8   67.07    2.67
   0  -3  -8   70.41    2.78
   0   3  -8   67.11    2.94
   0   3   8   70.98    2.65
   5   0  -2   68.18    3.03
   5   0  -2   68.46    2.67
  -5   0   2   65.49    2.75
  -5   0  -2   65.45    2.54
  -5   0   2   65.46    2.79
  -5   0  -2   68.24    2.57
  -5   0   2   65.62    2.55
   5   0   2   68.01    2.64
   0  -5  -5    5.82    0.48
   0   5  -5    5.21    0.59
   0   5  -5    4.89    0.45
   0  -5   5    5.23    0.43
   0  -5  -5    5.54    0.42
   0   5   5    4.75    0.43
   0   5  -5    5.03    0.46
   0  -5   5    7.11    0.93
   0  -5   5    5.54    0.41
   0  -5  -5    5.40    0.48
   2   2   8   23.05    0.99
   2  -2   8   21.50    1.02
  -2   2   8   21.71    1.00
  -2   2  -8   20.67    1.36
   2  -2   8   21.87    1.27
  -2  -2   8   21.50    1.21
   2  -2  -8   22.58    1.19
   2  -2  -8   22.13    1.19
  -2   2   8   21.95    1.00
   2   2  -8   21.93    1.13
  -2  -2  -8   21.58    0.98
   2  -2   8   22.49    1.00
  -2  -2   8   22.96    1.09
   2  -2  -8   23.57    1.10
  -2  -2   8   20.90    0.98
  -2   2  -8   22.14    1.01
  -2  -2  -8   22.77    1.01
  -4   2  -5   33.03    1.48
   4   2  -5   35.33    1.86
   4  -2   5   31.60    1.71
  -4  -2   5   32.63    1.58
   4  -2   5   32.49    1.32
  -4   2   5   34.44    1.59
   4   2  -5   34.53    1.78
  -4  -2  -5   34.52    1.49
  -4  -2   5   27.87    1.28
   4  -2  -5   34.25    1.46
   4  -2   5   33.63    1.44
  -4   2   5   33.95    1.43
  -4   2  -5   34.18    1.44
  -4  -2  -5   30.15    1.40
  -4  -2   5   31.47    1.47
  -4   2   5   32.87    1.53
   4  -2  -5   32.09    1.70
  -4  -2  -5   33.74    1.37
  -4  -2  -5   33.03    1.42
   3  -3   6  401.87   14.09
  -3  -3   6  380.11   13.51
   3   3  -6  392.93   14.17
  -3   3   6  418.48   14.86
  -3  -3   6  401.73   14.27
   3   3  -6  405.27   14.66
  -3   3   6  417.33   14.79
  -3   3   6  395.77   13.95
   3  -3   6  412.35   14.52
   3  -3  -6  400.94   14.16
  -3  -3  -6  376.71   13.39
  -3   3  -6  412.39   14.65
   3  -3  -6  421.33   15.18
  -3  -3   6  403.89   14.36
  -3   3  -6  409.30   14.58
   3  -3   6  403.41   14.73
   3   3  -6  401.30   14.50
  -3  -3  -6  394.68   13.97
  -3  -3   6  397.07   14.45
  -3  -3  -6  418.36   14.68
   0   4  -7   46.67    1.97
   0  -4  -7   50.41    2.05
   0  -4   7   48.99    1.92
   0  -4  -7   49.10    1.94
   0   4   7   48.39    1.96
   0  -4   7   50.11    2.05
   0  -4   7   42.71    2.17
   0   4  -7   49.00    2.19
   0  -4  -7   49.60    2.06
   2  -4  -6   72.42    2.75
  -2  -4   6   71.70    2.76
  -2   4  -6   74.35    2.84
   2  -4   6   73.06    2.73
  -2   4  -6   73.21    2.92
   2   4  -6   74.25    3.04
  -2  -4  -6   74.53    2.85
  -2   4   6   72.45    2.77
  -2  -4  -6   74.30    2.78
  -2  -4  -6   72.07    2.78
  -2  -4   6   74.93    2.89
   2  -4  -6   75.11    3.10
  -2  -4   6   77.74    3.44
  -2   4  -6   70.58    2.84
   2   4  -6   75.52    3.09
   2  -4   6   74.10    3.29
   2  -4   6   73.23    2.79
   2   4   6   70.66    2.84
   0   6   0  103.74    3.87
   0  -6   0  107.98    4.00
   0   6   0  110.49    4.19
   0   6   0  101.31    3.98
   0  -6   0   99.42    3.69
   0  -6   0  104.62    4.03
  -4   0  -6  192.35    7.29
   4   0  -6  242.87    9.06
   4   0  -6  220.55    8.24
  -4   0  -6  195.26    7.04
  -4   0  -6  198.66    7.09
  -4   0   6  201.89    7.38
   4   0  -6  191.13    7.05
   4   0  -6  235.87    8.74
  -5  -1   2   11.94    0.84
  -5   1   2    9.58    0.76
   5  -1  -2   11.53    0.80
  -5   1  -2   11.29    0.63
  -5  -1  -2   10.74    0.59
   5   1  -2   10.80    0.87
  -5   1   2   10.88    0.64
  -5  -1   2   12.66    0.74
  -5  -1  -2   12.15    0.70
   5  -1  -2   11.16    0.67
   5  -1   2   11.10    0.67
   5   1  -2   12.00    0.71
  -5   1   2   11.76    0.89
   1  -3   8   64.47    2.50
   1   3  -8   65.29    2.90
  -1   3   8   65.57    2.53
  -1  -3  -8   60.58    2.34
   1  -3  -8   64.78    2.50
  -1  -3   8   67.85    2.66
  -1   3   8   65.43    2.46
   1  -3   8   64.73    2.45
  -1  -3  -8   66.42    2.54
   1   3   8   61.89    2.35
  -1  -3   8   64.19    2.47
  -1   3  -8   64.59    2.53
   1   3  -8   68.76    2.74
   1  -3  -8   65.94    2.68
   1  -3   8   63.24    2.81
   1   3  -8   66.41    2.69
  -1  -3   8   62.74    2.77
   1  -3   8   61.38    2.42
   1  -3  -8   68.21    2.74
  -1   3  -8   64.34    2.82
   1   3   8   60.12    2.51
   0   6  -1    0.07    0.22
   0  -6   1    0.21    0.17
   0  -6  -1    0.11    0.21
   0   6  -1    0.32    0.28
   0   6   1    0.12    0.26
   0   6   1    0.04    0.28
   0   6   1    0.29    0.25
   0   6  -1    0.30    0.42
   0  -6  -1   -0.18    0.39
   0  -6   1   -0.08    0.44
   0  -6  -1    0.24    0.16
   0   6  -1    0.17    0.30
  -1  -5   5  111.76    4.13
  -1   5  -5  110.68    4.13
   1  -5  -5  114.67    4.27
  -1  -5  -5  108.38    4.05
  -1   5  -5  110.53    4.19
  -1  -5   5  115.54    4.71
  -1  -5  -5  108.42    3.95
   1  -5   5  100.39    3.74
   1  -5  -5  109.91    4.05
  -1  -5  -5  105.94    4.09
  -1   5  -5  111.35    4.26
   1   5   5  114.83    4.34
  -1  -5   5  112.10    4.21
  -1   5   5  109.66    4.08
   1  -5   5  113.56    4.19
  -1  -5  -5  107.05    3.99
   1   5  -5  108.81    4.19
   1  -5  -5  112.92    4.44
   1   5  -5  106.23    4.06
  -2  -5  -4   95.15    3.50
   2   5  -4  101.53    3.97
  -2  -5  -4   94.92    3.77
   2  -5  -4   99.14    3.67
   2  -5   4  101.19    3.75
   2  -5   4   98.94    3.63
  -2  -5  -4  103.16    3.89
  -2   5  -4  101.22    3.77
  -2  -5   4   97.27    3.67
   2   5  -4  100.00    3.97
  -2   5   4  100.78    3.83
  -2  -5  -4   97.23    3.66
   2  -5   4   96.03    3.90
   2   5  -4   99.21    3.81
  -2   5  -4  101.23    3.84
  -2  -5   4  103.17    3.93
  -2  -5   4  104.67    4.34
  -2   5  -4  101.41    3.86
   0  -2   9   95.94    3.54
   0  -2  -9   98.73    3.71
   0  -2   9   98.16    3.69
   0   2  -9   97.00    4.05
   0  -2  -9   99.18    3.80
   0  -2   9   91.44    3.54
   0   2  -9  100.63    3.79
   0  -2  -9   95.21    3.57
   0   2   9   99.16    3.70
   0   2   9  101.31    3.70
  -4  -3   4  195.32    7.18
  -4   3   4  187.43    6.64
   4  -3   4  184.74    6.59
  -4  -3  -4  187.40    6.88
  -4   3  -4  183.57    6.63
   4  -3   4  199.05    7.59
   4   3  -4  182.19    6.89
  -4   3  -4  186.58    6.78
  -4  -3  -4  193.83    7.00
   4   3  -4  191.10    7.08
   4   3  -4  180.10    6.83
  -4  -3   4  192.70    7.33
  -4   3   4  183.90    6.89
  -4  -3  -4  202.29    7.16
  -4   3  -4  191.42    6.80
  -4   3   4  189.80    6.78
  -4  -3   4  190.46    6.93
  -4   3   4  192.65    7.13
   4  -3   4  195.79    7.04
   4  -3  -4  195.08    6.97
  -4  -3   4  192.50    6.94
  -4  -3  -4  192.01    6.90
  -4  -3  -4  172.90    6.60
   4  -1   6  560.76   19.46
   4   1  -6  624.85   22.13
  -4  -1  -6  539.62   18.94
  -4   1  -6  571.00   19.71
   4  -1  -6  543.46   18.99
   4  -1  -6  596.21   20.85
  -4   1  -6  558.45   19.70
  -4   1   6  559.84   19.79
  -4  -1  -6  581.55   20.09
   4   1  -6  572.38   19.94
   4   1  -6  683.61   23.91
  -4  -1   6  565.77   19.84
   4  -1  -6  541.67   21.34
  -4  -1  -6  573.02   19.74
  -4   1  -6  569.40   19.61
  -4  -1   6  561.04   19.64
  -4   1   6  576.22   20.07
   4   1  -6  583.70   22.02
  -4  -1  -6  552.28   19.67
   4  -1  -6  565.53   23.48
   4  -1   6  575.57   19.89
  -3   5   0   26.11    1.16
   3  -5   0   24.98    1.22
   3   5   0   24.31    1.43
  -3   5   0   24.74    1.37
  -3   5   0   24.31    1.06
   3   5   0   24.31    1.12
  -3  -5   0   24.97    1.22
  -3  -5   0   27.93    1.30
   3  -5   0   24.83    1.05
  -3  -5   0   24.36    1.24
  -3  -5   0   23.70    1.31
   3  -5   0   24.75    1.09
  -5   0  -3  263.89    9.27
   5   0  -3  245.97    9.14
  -5   0   3  252.24    9.17
  -5   0  -3  255.87    9.06
  -5   0   3  247.80    8.78
  -5   0   3  258.68    9.43
   5   0   3  258.17    9.16
  -1  -4  -7   62.87    2.40
   1  -4   7   63.57    2.40
   1   4   7   62.78    2.49
  -1  -4   7   63.11    2.53
   1   4  -7   61.81    2.49
  -1  -4  -7   61.77    2.35
  -1  -4   7   65.42    2.96
  -1  -4   7   61.90    2.38
  -1   4   7   62.39    2.41
   1  -4   7   61.66    2.83
  -1  -4   7   57.58    2.27
   1  -4  -7   61.93    2.38
   1   4  -7   62.56    2.66
   1  -4   7   67.84    2.60
  -1   4  -7   61.59    2.57
   1  -4  -7   64.06    2.61
   1   4  -7   62.94    2.55
  -1   6   0   12.18    0.69
  -1   6   0   13.56    0.78
   1   6   0   12.68    0.80
  -1  -6   0   13.27    0.85
   1  -6   0   13.02    0.64
   1   6   0   12.65    0.71
  -1   6   0   13.67    0.78
  -1  -6   0   14.23    0.76
  -1  -6   0   12.51    0.68
   1   6   0   12.62    0.86
   1  -6   0   12.36    0.80
  -4  -4   0   45.84    2.05
  -4  -4   0   42.77    1.91
  -4   4   0   45.74    2.13
   4  -4   0   45.34    1.91
   4   4   0   43.07    1.77
  -4   4   0   45.81    1.83
  -4   4   0   45.34    1.76
   4  -4   0   47.21    1.87
  -4  -4   0   45.72    2.18
  -4  -4   0   44.16    1.81
   3  -5   1    1.33    0.40
  -3   5   1    1.04    0.21
  -3  -5  -1    4.09    0.54
   3  -5   1    1.08    0.21
  -3  -5   1    0.67    0.28
  -3  -5   1    1.27    0.35
  -3  -5  -1    0.72    0.30
  -3   5  -1    0.86    0.24
  -3   5   1    1.07    0.28
   3  -5   1    0.89    0.23
   3  -5  -1    1.00    0.26
   3   5  -1    1.17    0.49
  -3  -5  -1    1.00    0.30
  -3  -5   1    0.90    0.29
  -3   5  -1    0.99    0.21
  -3  -5  -1    1.09    0.36
  -3  -5   1    1.14    0.56
  -3   5   1    1.00    0.38
   3   5   1    1.36    0.28
   3   5  -1    0.88    0.32
  -3   5  -1    1.26    0.27
   3  -5  -1    1.04    0.36
   0  -6   2   36.46    1.48
   0   6   2   39.67    1.93
   0   6  -2   38.80    1.70
   0   6  -2   37.67    1.73
   0  -6  -2   38.40    1.55
   0  -6   2   39.70    1.83
   0  -6   2   41.73    1.70
   0   6  -2   39.84    1.76
   0  -6  -2   40.27    1.65
   0  -6  -2   38.05    1.66
   0   6  -2   38.68    1.64
  -1   6   1   18.39    0.95
   1   6   1   19.73    0.95
  -1  -6   1   17.62    0.86
   1  -6  -1   18.06    0.99
  -1   6   1   18.65    0.98
   1   6  -1   17.45    1.01
   1  -6   1   16.97    0.78
   1  -6  -1   18.08    0.87
   1   6   1   17.81    1.11
   1   6  -1   18.57    0.95
  -1  -6   1   18.82    1.08
  -1  -6  -1   19.01    0.93
  -1  -6   1   17.01    0.85
  -1  -6  -1   18.69    1.03
  -1   6  -1   19.58    0.99
  -1   6  -1   18.09    0.94
   1  -6   1   18.02    0.87
   1  -6  -1   18.23    0.82
  -1   6  -1   17.52    0.90
  -1   6  -1   18.08    0.95
  -1  -6  -1   16.65    0.84
  -1   6   1   18.54    0.91
  -4   4   1   59.78    2.57
   4  -4  -1   56.12    2.25
  -4  -4  -1   57.20    2.49
  -4  -4  -1   59.58    2.56
  -4  -4   1   58.38    2.67
   4   4   1   58.34    2.28
   4   4  -1   58.85    2.34
  -4  -4  -1   59.34    2.34
  -4  -4   1   59.07    2.33
   4  -4   1   57.49    2.37
   4   4  -1   51.73    2.46
   4  -4  -1   58.95    2.28
   4  -4   1   59.37    2.29
  -4   4  -1   58.76    2.22
  -4  -4   1   58.08    2.42
  -4  -4  -1   52.51    2.32
  -4   4   1   57.40    2.23
  -4   4   1   55.65    2.11
  -4  -4  -1   54.19    2.25
  -4   4  -1   58.38    2.27
  -4  -4   1   60.42    2.53
  -5  -2  -1  316.91   11.52
  -5  -2  -1  331.14   11.97
   5   2  -1  341.51   12.09
  -5   2   1  337.96   11.83
  -5  -2   1  324.95   11.67
  -5   2  -1  336.82   11.80
  -5  -2   1  330.02   11.89
  -5   2   1  319.59   11.65
  -5  -2  -1  325.96   11.69
   5  -2  -1  340.00   11.98
  -5   2   1  346.50   12.48
  -5   2  -1  321.94   11.31
  -5   2   1  315.35   11.09
   5  -2   1  331.80   11.68
  -5  -2   1  335.35   11.83
   5  -2  -1  332.77   11.78
   5  -2   1  314.65   11.24
   3   0  -8  174.89    6.31
   3   0  -8  170.35    6.44
   3   0  -8  182.48    6.93
  -3   0   8  178.41    6.40
  -3   0  -8  173.77    6.70
   3   0  -8  185.03    7.28
   3   0   8  181.01    6.43
  -3   0  -8  177.86    6.34
  -3   0   8  177.94    6.40
   5  -1  -3  334.73   11.99
  -5   1   3  348.11   12.24
  -5   1  -3  350.69   12.29
  -5  -1   3  333.24   11.76
  -5  -1  -3  338.52   11.94
   5  -1   3  357.42   12.56
  -5   1   3  351.85   12.78
  -5  -1   3  318.02   11.41
  -5  -1  -3  338.49   11.82
   5   1  -3  353.07   12.82
  -5  -1   3  350.49   12.63
  -5   1   3  345.75   12.36
  -3   4   5   65.40    2.61
   3  -4  -5   65.50    2.50
  -3  -4  -5   64.45    2.51
   3  -4   5   64.03    2.44
  -3  -4   5   68.43    3.09
  -3  -4   5   62.47    2.49
  -3   4  -5   61.05    2.44
  -3   4  -5   62.99    2.41
  -3   4   5   66.95    2.57
   3   4  -5   62.45    2.67
  -3  -4  -5   67.22    2.51
   3  -4   5   65.57    2.92
   3  -4   5   62.26    2.33
   3   4  -5   61.89    2.57
  -3   4  -5   59.94    2.40
  -3  -4  -5   63.99    2.50
   3  -4  -5   64.82    2.84
  -3  -4   5   63.83    2.52
  -3   4   5   64.01    2.57
  -3  -4  -5   60.25    2.67
  -1  -2  -9   31.57    1.35
   1  -2  -9   31.49    1.36
   1  -2   9   32.62    1.40
  -1  -2  -9   32.21    1.35
  -1   2   9   31.69    1.30
   1  -2   9   33.04    1.61
  -1  -2   9   33.10    1.61
   1   2   9   32.76    1.31
  -1  -2   9   28.99    1.29
   1   2  -9   30.15    1.37
   1   2  -9   33.37    1.86
  -1   2  -9   31.20    1.35
  -1  -2   9   31.76    1.33
   1  -2  -9   31.43    1.46
  -1   2  -9   32.44    1.78
   1   2   9   29.66    1.31
   1  -2   9   30.55    1.32
  -1   2   9   32.33    1.35
   1  -2  -9   29.97    1.37
  -2   0   9   12.27    0.66
  -2   0  -9   11.73    0.63
   2   0  -9    9.93    0.64
  -2   0  -9    9.17    0.92
   2   0  -9   10.81    0.75
   2   0  -9   11.00    0.72
   2   0   9   10.78    0.57
  -2   0   9   11.14    0.65
  -3  -5  -2   73.92    2.87
  -3  -5   2   72.24    2.85
  -3   5   2   76.22    2.89
  -3  -5   2   73.89    2.91
  -3   5   2   75.27    3.04
  -3  -5  -2   72.05    3.00
   3  -5  -2   74.81    2.90
   3   5  -2   72.56    2.83
  -3   5  -2   71.48    2.74
  -3  -5  -2   70.13    2.79
   3  -5   2   71.28    2.88
  -3  -5   2   75.60    3.23
   3  -5   2   72.39    2.69
  -3   5   2   71.74    2.69
  -3   5  -2   74.64    2.81
  -3  -5   2   68.57    2.71
  -3  -5  -2   73.02    2.95
   3   5  -2   70.13    2.97
   3  -5   2   73.19    2.75
  -3   5  -2   69.58    2.69
   1  -6  -2  181.48    6.50
   1   6   2  172.32    6.60
  -1   6   2  184.79    6.83
   1  -6   2  180.74    6.42
  -1   6  -2  187.82    6.84
   1   6  -2  175.43    6.61
  -1   6  -2  182.67    6.58
   1   6  -2  159.49    5.79
   1  -6  -2  188.91    6.85
  -1  -6  -2  182.18    6.61
  -1  -6   2  185.90    6.89
  -1   6   2  183.11    6.62
  -1  -6  -2  181.98    6.55
  -1  -6   2  180.94    6.48
  -1   6  -2  187.35    6.81
   1   6  -2  188.60    6.95
   1  -6  -2  180.56    6.44
  -1  -6  -2  188.98    6.76
  -1   6  -2  189.25    6.83
   1  -6   2  184.32    6.59
   4   4  -2  281.96   10.37
  -4  -4  -2  288.28   10.46
  -4  -4  -2  286.78   10.31
   4   4  -2  298.71   10.61
   4  -4   2  295.34   10.43
  -4   4  -2  279.49    9.87
  -4  -4  -2  274.75   10.04
  -4   4   2  293.26   10.32
  -4  -4  -2  259.64    9.23
  -4   4  -2  283.07    9.99
  -4  -4  -2  279.66   10.01
  -4   4   2  288.28   10.43
   4  -4  -2  295.68   10.47
  -4  -4   2  281.74   10.08
  -4   4  -2  274.40    9.67
  -4   4   2  286.50   10.04
   4  -4   2  266.04    9.35
  -4  -4   2  286.71   10.65
   4  -4   2  272.05    9.80
  -4  -4   2  277.87    9.84
  -4  -4   2  276.40    9.94
   3   1  -8  508.08   18.18
   3  -1  -8  492.00   17.22
  -3  -1   8  498.92   17.42
   3  -1  -8  494.89   17.71
   3   1  -8  499.28   18.47
  -3   1   8  498.62   17.38
  -3  -1   8  511.39   17.88
  -3   1  -8  508.18   17.71
  -3  -1  -8  508.58   17.72
   3  -1  -8  497.65   17.66
  -3   1   8  499.37   17.46
   3   1   8  526.23   18.28
   3  -1  -8  512.48   18.13
  -3  -1  -8  479.99   17.08
  -3   1  -8  487.92   17.43
  -3  -1   8  466.73   16.45
   3   1  -8  504.77   18.08
  -3   1   8  508.33   17.89
   3   1  -8  480.90   16.85
  -5   2   2  386.98   13.83
  -5  -2   2  383.75   13.70
  -5  -2   2  392.61   13.97
  -5   2  -2  380.26   13.31
  -5   2   2  399.63   13.99
   5  -2   2  391.79   13.73
   5  -2  -2  392.69   13.80
  -5  -2   2  395.12   13.90
   5  -2   2  387.42   13.95
  -5  -2  -2  386.55   13.59
  -5  -2  -2  363.57   13.16
  -5   2   2  389.95   14.03
  -5   2   2  376.35   13.13
   5   2  -2  406.94   14.44
   5  -2  -2  369.11   12.98
  -5   2  -2  360.77   12.63
  -5  -2  -2  369.16   13.34
   2  -1  -9  101.40    3.78
   2   1  -9  104.62    4.02
   2  -1  -9  104.06    4.00
   2   1  -9   96.88    3.74
  -2  -1   9   97.11    3.62
   2   1  -9   95.19    3.56
  -2   1   9   99.81    3.68
  -2   1   9   99.80    3.68
  -2  -1  -9   97.21    3.87
   2   1   9  100.04    3.63
   2  -1   9   99.70    3.62
  -2  -1   9  101.16    3.73
  -2  -1  -9   94.51    3.49
   2  -1  -9  103.50    4.01
  -2   1  -9   99.71    3.68
  -2   1  -9   97.58    4.07
   0   5  -6  440.64   15.54
   0  -5   6  433.85   15.21
   0  -5  -6  425.67   15.03
   0  -5  -6  439.98   15.40
   0   5  -6  433.54   15.30
   0  -5  -6  428.62   14.96
   0  -5   6  427.18   15.50
   0  -5   6  431.70   15.09
   0   5  -6  428.03   15.12
   0   5   6  434.16   15.25
   0  -6   3   88.25    3.55
   0   6  -3   87.43    3.31
   0   6  -3   87.74    3.44
   0   6  -3   88.54    3.42
   0  -6   3   92.05    3.44
   0  -6  -3   87.02    3.23
   0  -6  -3   90.03    3.43
   0  -6   3   84.28    3.14
   0   6  -3   83.87    3.30
   0  -6  -3   92.12    3.42
  -5   0  -4   17.46    0.86
   5   0   4   17.86    0.89
  -5   0   4   16.86    0.87
  -5   0   4   17.13    0.99
   5   0  -4   17.18    0.91
   5   0  -4   16.85    1.17
  -5   0  -4   17.55    0.82
  -5   0   4   14.50    0.92
   4  -2  -6   41.28    1.99
  -4   2  -6   39.34    1.62
   4   2  -6   44.94    2.24
   4  -2   6   39.45    1.90
  -4  -2  -6   40.12    1.82
  -4   2  -6   40.14    1.61
   4  -2   6   41.57    1.62
  -4  -2  -6   39.91    1.64
   4  -2  -6   38.59    1.62
  -4  -2  -6   42.40    1.66
   4   2  -6   42.04    2.01
  -4  -2  -6   41.86    1.75
  -4   2  -6   37.73    1.66
  -4   2   6   39.97    1.74
  -4  -2  -6   38.83    1.67
  -4  -2   6   37.71    1.64
   4  -2   6   40.40    1.67
  -4  -2   6   40.45    1.75
  -4   2   6   39.31    1.72
   2   3  -8  629.61   18.85
  -2   3  -8  630.60   18.68
  -2  -3  -8  623.71   18.42
   2  -3   8  603.74   21.28
   2  -3   8  597.16   20.58
  -2   3   8  627.01   21.59
  -2  -3   8  597.50   20.90
   2  -3  -8  576.47   20.22
   2  -3  -8  612.02   21.45
   2   3  -8  514.57   18.17
  -2  -3   8  628.84   18.72
  -2   3   8  610.74   21.06
   2  -3   8  623.95   18.45
   2   3  -8  605.89   21.23
  -2  -3  -8  619.48   21.35
   2  -3  -8  615.08   21.22
  -2   3  -8  596.28   20.87
  -2   5  -5   65.17    2.49
  -2   5   5   51.74    2.04
  -2  -5   5   64.40    2.56
   2   5   5   62.51    2.53
  -2  -5   5   63.82    2.46
  -2  -5  -5   65.53    2.53
   2   5  -5   64.10    2.63
  -2  -5  -5   60.25    2.57
   2   5  -5   65.12    2.70
   2  -5   5   68.41    2.58
  -2   5  -5   64.93    2.58
  -2  -5  -5   65.33    2.50
   2  -5   5   61.79    2.31
  -2  -5  -5   65.38    2.43
  -2  -5   5   67.01    3.04
   2  -5   5   61.35    2.74
   2   5  -5   62.98    2.55
  -2   5  -5   62.12    2.48
   2  -5  -5   66.61    2.88
   2  -5  -5   64.46    2.44
  -4   3   5  184.29    6.72
  -4  -3   5  173.72    6.28
  -4   3  -5  177.09    6.25
  -4  -3  -5  189.41    6.65
  -4  -3   5  180.32    6.75
   4  -3   5  166.04    6.74
   4   3  -5  190.73    7.10
  -4   3  -5  163.62    5.92
  -4  -3  -5  186.43    6.65
  -4  -3   5  182.71    6.62
  -4   3   5  194.59    7.05
  -4  -3  -5  183.37    6.61
   4  -3   5  183.89    6.53
  -4   3   5  180.82    6.41
  -4   3  -5  186.03    6.62
   4  -3   5  181.18    6.37
   4   3  -5  174.48    6.56
   4  -3  -5  180.80    6.84
  -4  -3  -5  178.95    6.42
   4  -3  -5  188.05    6.69
   4   3  -5  182.87    6.86
   0   0 -10  347.98   12.49
   0   0 -10  343.01   12.08
   0   0  10  346.47   12.05
   0   0  10  378.29   13.10
   0   0 -10  335.16   11.81
   0   0 -10  362.55   12.69
  -3   5   3  314.89   11.01
  -3   5   3  308.31   11.14
   3  -5   3  322.54   11.51
  -3  -5  -3  308.15   11.14
   3  -5   3  301.85   10.55
  -3  -5  -3  309.23   10.89
  -3  -5   3  329.79   11.99
   3   5  -3  321.59   11.55
  -3   5   3  304.68   10.61
  -3   5  -3  315.34   11.04
  -3  -5   3  296.68   10.44
   3  -5   3  304.79   10.62
   3  -5  -3  313.41   10.92
  -3  -5  -3  282.06   10.14
   3  -5  -3  319.58   11.21
   3   5  -3  326.40   11.52
  -3   5  -3  309.71   10.85
  -3   5   3  306.63   10.90
  -3   5  -3  301.00   10.56
   3   5  -3  298.15   10.82
  -3  -5   3  313.70   11.06
  -3  -5  -3  307.78   10.83
  -3  -5   3  302.40   10.70
  -3   3  -7  210.65    7.58
  -3   3   7  178.21    6.33
   3  -3   7  205.65    7.26
   3  -3  -7  202.86    7.20
  -3  -3  -7  195.21    6.86
   3   3  -7  202.58    7.52
  -3  -3   7  207.54    7.65
   3  -3   7  191.59    7.23
  -3  -3   7  205.57    7.33
   3   3  -7  205.36    7.48
  -3   3  -7  191.39    6.96
  -3   3   7  211.87    7.57
   3   3  -7  201.25    7.41
  -3   3   7  208.94    7.42
  -3   3  -7  169.64    6.03
   3  -3  -7  195.89    7.24
   3  -3   7  196.44    6.91
  -3  -3   7  197.71    7.09
  -3  -3  -7  192.49    6.88
  -1  -5   6   76.93    2.88
   1  -5   6   76.18    3.31
  -1  -5   6   82.81    3.55
  -1  -5  -6   82.28    3.01
  -1  -5  -6   74.25    3.05
   1   5  -6   82.18    3.20
   1  -5   6   81.90    3.01
  -1   5  -6   75.24    2.87
   1   5  -6   80.74    3.18
  -1   5   6   78.90    2.97
  -1  -5  -6   81.94    3.05
   1  -5  -6   83.91    3.15
  -1  -5   6   80.38    3.08
   1  -5  -6   75.28    2.82
   1  -5   6   82.67    3.09
  -1   5  -6   77.33    3.03
   1   5  -6   69.87    2.81
   1  -5  -6   77.54    3.12
   1   5   6   79.48    3.06
  -1  -5  -6   79.86    3.01
   5   1  -4  637.32   19.65
   5   1  -4  567.49   29.33
  -5   1   4  612.56   21.59
  -5  -1   4  644.97   19.18
  -5  -1  -4  620.34   21.48
  -5  -1  -4  633.45   18.67
  -5   1  -4  551.59   19.32
  -5   1  -4  632.46   18.65
  -5   1   4  644.77   19.11
  -5  -1   4  617.31   21.68
  -5   1   4  653.55   19.64
   5  -1  -4  622.77   18.75
   5   1  -4  637.03   18.93
   5  -1   4  637.96   18.94
  -5  -1   4  646.69   19.47
   5  -1  -4  602.30   20.90
   1  -6  -3   93.67    3.46
   1  -6   3  103.47    3.79
  -1   6  -3  101.21    3.84
  -1  -6   3   94.16    3.48
   1  -6   3   98.09    3.56
  -1  -6   3   99.96    4.01
  -1   6  -3  106.20    3.95
  -1  -6  -3   96.36    3.58
  -1  -6  -3   94.66    3.55
   1  -6  -3  103.07    3.85
  -1   6  -3  100.52    3.75
   1   6  -3  100.82    3.94
  -1   6  -3   90.24    3.44
   1   6  -3  101.81    3.91
  -1  -6  -3  104.92    3.85
  -1  -6   3   92.60    3.47
   1   6   3   99.57    3.79
  -4  -4   3   55.32    2.20
  -4  -4  -3   58.23    2.36
  -4   4   3   56.39    2.14
  -4   4  -3   58.08    2.20
  -4   4  -3   53.90    2.12
  -4   4  -3   56.47    2.20
  -4   4   3   55.89    2.17
   4  -4   3   57.70    2.16
   4  -4  -3   60.13    2.35
  -4  -4   3   55.72    2.30
   4  -4   3   54.91    2.39
   4  -4   3   59.56    2.28
  -4  -4   3   53.97    2.22
  -4  -4  -3   55.01    2.27
   4   4  -3   55.04    2.50
   4   4  -3   58.59    2.38
  -4   4   3   60.90    2.53
  -4  -4  -3   57.78    2.52
  -4  -4   3   59.62    2.77
  -4   4   3   58.46    2.57
  -4  -4  -3   59.19    2.32
  -5  -2  -3   35.19    1.41
   5  -2   3   39.02    2.02
   5   2  -3   37.54    1.78
  -5   2   3   40.35    1.82
  -5  -2   3   37.48    1.71
  -5  -2  -3   34.91    1.79
  -5   2   3   38.52    1.84
  -5   2  -3   38.81    1.54
  -5   2   3   36.77    1.51
  -5  -2  -3   37.28    1.58
  -5   2  -3   38.38    1.55
  -5  -2   3   37.59    1.60
   5  -2   3   37.03    1.55
  -5  -2   3   36.30    1.67
   2  -4   7   72.10    2.71
   2  -4  -7   69.39    2.85
   2   4  -7   69.16    2.76
   2   4  -7   69.72    2.90
  -2   4  -7   75.47    2.99
  -2  -4  -7   69.42    2.65
  -2  -4  -7   70.90    2.63
   2  -4  -7   66.15    2.53
  -2  -4   7   65.90    2.92
  -2  -4   7   62.86    2.42
  -2  -4   7   71.82    2.76
   2  -4   7   68.68    3.09
  -2   4   7   68.54    2.54
   2  -4   7   68.20    2.52
  -2   4   7   70.36    2.66
  -2  -4  -7   69.25    2.61
   2   4   7   70.67    2.80
   2   4  -7   68.71    2.81
   4   0  -7    1.20    0.58
   4   0   7    3.25    0.30
  -4   0  -7    1.35    0.25
   4   0  -7    2.26    0.53
  -4   0   7    1.32    0.31
  -4   0  -7    1.56    0.58
  -4   0   7    1.68    0.34
   4   0  -7    1.04    0.36
  -4   0  -7    1.39    0.22
   4   0  -7    1.66    0.54
  -4   0  -7    1.28    0.26
   2  -6   0    2.74    0.47
  -2  -6   0    2.43    0.33
  -2   6   0    2.65    0.36
  -2   6   0    2.56    0.42
  -2  -6   0    2.35    0.34
   2   6   0    2.16    0.34
  -2   6   0    3.08    0.38
  -2  -6   0    2.24    0.32
   2  -6   0    2.37    0.32
   2   6   0    2.84    0.57
  -2  -6   0    2.68    0.52
   2  -6   0    2.03    0.40
  -2   6   0    2.19    0.30
   0   1 -10  173.68    6.33
   0   1 -10  172.39    6.19
   0  -1 -10  175.05    6.48
   0  -1  10  176.05    6.22
   0   1 -10  180.93    6.88
   0  -1  10  170.93    6.17
   0  -1 -10  158.62    5.78
   0   1  10  179.29    6.36
   0  -1 -10  171.15    6.22
   0   1  10  184.42    6.50
   0  -1 -10  179.64    6.43
   0   3   9    6.88    0.41
   0  -3  -9    6.55    0.48
   0   3  -9    6.83    0.52
   0  -3   9    6.48    0.51
   0  -3  -9    7.03    0.48
   0   3   9    7.42    0.49
   0   3  -9    6.89    0.54
   0  -3   9    6.62    0.51
   0   3  -9    7.21    0.88
   0  -3  -9    6.74    0.52
   1   0 -10  109.04    4.04
  -1   0  10  117.01    4.22
  -1   0  10  108.36    4.03
   1   0  10  110.40    4.03
  -1   0 -10  121.31    4.41
  -1   0 -10  113.05    4.60
   1   0 -10  112.79    4.46
   1   0  10  119.69    4.28
   1   0 -10  115.25    4.27
   1   0 -10  108.18    4.09
   0  -4   8  141.65    5.15
   0   4  -8  131.02    4.88
   0  -4  -8  135.81    5.00
   0   4  -8  139.60    5.27
   0  -4   8  130.45    4.71
   0   4   8  134.37    4.87
   0  -4  -8  133.85    4.81
   0  -4  -8  141.14    5.13
   0   4  -8  131.65    4.87
  -3  -2  -8  312.13   10.94
   3  -2  -8  291.50   10.53
  -3  -2   8  313.25   10.98
  -3   2   8  301.91   10.68
  -3  -2   8  291.02   10.31
   3  -2   8  305.34   10.92
  -3   2  -8  295.97   10.67
   3   2  -8  300.75   10.79
  -3  -2  -8  296.71   10.59
   3  -2  -8  300.40   10.53
  -3   2   8  300.13   10.47
  -3  -2  -8  284.56    9.98
  -3   2  -8  274.67    9.82
  -3  -2  -8  301.02   10.48
   3   2  -8  313.23   11.43
  -3   2   8  307.14   10.76
   3  -2  -8  304.71   11.03
  -3  -2   8  300.63   10.55
   3  -2   8  289.13   10.11
  -2  -2   9   19.70    0.92
  -2   2  -9   20.81    0.96
  -2   2   9   20.09    0.92
  -2  -2  -9   19.76    0.90
   2   2   9   20.01    0.87
  -2  -2   9   21.47    1.20
  -2   2  -9   19.71    1.35
   2  -2  -9   18.56    1.02
  -2   2   9   19.27    0.89
   2  -2  -9   18.60    0.98
  -2  -2   9   18.49    0.93
   2  -2  -9   19.75    1.08
  -2  -2  -9   21.56    1.18
   2  -2   9   20.61    1.17
   2   2  -9   20.94    1.09
   4   1  -7  138.92    5.48
  -4  -1  -7  125.66    4.96
   4   1  -7  144.61    5.52
   4  -1  -7  141.11    5.30
  -4  -1  -7  132.64    4.73
  -4   1  -7  128.94    4.63
  -4  -1   7  137.90    5.04
  -4   1   7  134.34    4.93
  -4  -1   7  125.15    4.69
   4  -1  -7  134.83    5.73
   4   1  -7  148.26    5.70
  -4  -1  -7  128.44    4.67
  -4   1   7  135.09    5.00
   4   1  -7  132.15    4.81
  -4   1  -7  124.12    4.50
  -4   1   7  132.17    4.76
  -4  -1   7  128.03    4.66
   4  -1  -7  141.48    5.59
  -4   1  -7  118.07    4.76
   4  -1  -7  130.96    4.77
   5   3   0   17.96    0.88
  -5   3   0   17.37    1.10
  -5  -3   0   17.74    1.08
   5  -3   0   18.06    0.89
  -5  -3   0   18.38    0.96
  -5  -3   0   18.20    1.11
  -5  -3   0   16.49    1.16
  -5   3   0   18.29    0.84
   5  -3   0   18.24    0.97
  -5   3   0   25.34    1.11
   0  -6  -4   43.21    1.73
   0   6  -4   41.23    1.77
   0   6   4   45.23    1.88
   0  -6   4   43.10    1.70
   0  -6  -4   43.25    1.79
   0   6  -4   43.25    1.85
   0  -6   4   48.63    1.94
   0  -6   4   45.26    2.18
   0   6  -4   42.96    1.80
   3  -4  -6   12.74    0.69
  -3   4  -6   11.30    0.74
  -3  -4  -6   12.09    0.61
  -3  -4   6   12.61    1.11
  -3  -4  -6   12.03    0.68
   3  -4  -6   13.33    0.94
  -3   4   6   12.88    0.63
   3  -4   6   10.97    1.15
   3   4  -6   12.06    0.84
  -3   4   6   12.59    0.70
   3   4  -6   12.51    0.91
   3   4  -6   11.10    0.81
  -3  -4  -6   11.09    0.89
  -3   4   6   11.56    0.64
  -3  -4  -6   12.00    0.66
  -3   4  -6   12.49    0.72
   3  -4   6   12.17    0.64
  -3  -4   6   11.32    0.66
  -3   4  -6   11.54    0.63
  -3   4   6   12.38    0.72
  -3  -4   6   11.52    0.70
   3  -4   6   12.11    0.60
  -3  -4   6   15.51    0.87
  -5   3   1   91.99    3.34
  -5  -3   1   85.68    3.53
  -5  -3   1   87.25    3.46
  -5  -3   1   83.43    3.34
   5  -3   1   88.29    3.42
  -5  -3  -1   86.27    3.62
   5   3  -1   88.85    3.35
  -5   3   1   87.80    3.24
   5  -3   1   87.49    3.25
   5  -3  -1   90.93    3.43
  -5   3  -1   91.16    3.31
  -5  -3  -1   91.49    3.67
  -5  -3   1   90.09    3.40
  -5  -3  -1   90.18    3.42
  -5  -3  -1   88.58    3.58
  -5   3   1   88.40    3.53
   5  -3  -1   89.75    3.33
  -5   3  -1   87.87    3.25
  -1   1  10   97.93    3.57
  -1  -1  10   98.36    3.59
  -1  -1 -10   99.38    3.66
  -1   1 -10  101.98    3.76
   1   1 -10   98.31    3.71
   1  -1 -10   92.81    3.47
  -1   1  10   94.94    3.48
   1  -1  10   93.96    3.45
   1   1  10   90.71    3.38
   1  -1  10   97.83    3.64
  -1  -1  10   85.25    3.28
   1   1  10   93.74    3.40
   1  -1 -10   97.34    3.85
   1  -1 -10   98.08    3.75
   1  -1  10  102.40    3.69
   1   1 -10   97.93    3.73
  -1   1 -10   92.35    3.87
   1   1 -10  101.90    4.20
  -1  -1 -10   93.84    3.73
   1  -1 -10   98.79    3.72
  -2  -6   2    3.12    0.66
   2   6  -2    2.76    0.46
   2  -6   2    2.84    0.54
   2   6  -2    3.37    0.54
  -2  -6   2    3.47    0.36
  -2   6   2    3.14    0.34
  -2  -6  -2    3.16    0.36
   2  -6  -2    3.40    0.35
   2  -6   2    4.06    0.36
  -2   6   2    3.03    0.38
  -2  -6  -2    3.38    0.37
  -2   6  -2    3.66    0.41
  -2  -6   2    3.38    0.40
   2  -6   2    3.07    0.30
  -2   6  -2    3.74    0.42
  -2   6  -2    3.15    0.35
   2   6  -2    3.56    0.45
  -2  -6  -2    2.98    0.47
   2   6   2    2.96    0.34
  -1  -3  -9   42.74    1.53
   1  -3   9   39.60    1.71
  -1  -3   9   37.26    1.42
   1  -3   9   41.35    1.62
   1  -3  -9   42.18    1.65
   1  -3  -9   41.03    1.49
  -1   3   9   39.51    1.44
   1  -3   9   40.40    1.65
  -1  -3   9   42.01    1.83
  -1  -3  -9   41.70    1.67
   1   3   9   42.11    1.63
  -1   3   9   41.27    1.43
   1   3   9   40.69    1.53
   1   3  -9   41.50    1.76
   1   3  -9   42.31    1.99
  -1   3  -9   40.75    1.51
   1  -3   9   40.10    1.93
  -1   3  -9   39.68    1.81
   1   3  -9   40.12    1.59
   1  -3  -9   40.06    1.75
  -1  -4  -8    1.49    0.23
   1  -4   8    1.16    0.23
  -1   4  -8    0.87    0.46
   1  -4  -8    1.06    0.26
   1   4  -8    1.39    0.65
   1  -4   8    0.85    0.75
  -1  -4   8    1.10    0.70
  -1  -4  -8    0.76    0.21
  -1  -4   8    1.21    0.26
   1   4  -8    0.93    0.32
   1   4  -8    1.04    0.32
  -1  -4   8    0.94    0.33
  -1  -4   8    1.39    0.33
   1   4   8    1.23    0.30
   1  -4   8    1.10    0.24
  -1   4   8    1.11    0.26
  -1   4   8    1.06    0.18
   1  -4  -8    1.13    0.31
   3   5  -4   18.28    1.06
  -3  -5   4   19.97    1.41
  -3   5   4   19.49    0.95
  -3  -5   4   18.15    0.85
  -3  -5  -4   17.38    0.99
  -3  -5   4   17.85    0.87
  -3   5  -4   18.80    0.82
  -3   5   4   17.69    0.75
   3  -5   4   18.04    0.74
   3  -5   4   18.43    1.15
   3   5  -4   18.11    0.94
  -3  -5  -4   18.10    0.89
  -3   5  -4   17.25    0.84
   3  -5  -4   18.21    0.86
   3   5  -4   17.91    1.08
  -3   5  -4   17.28    0.82
  -3  -5  -4   18.99    0.88
  -3   5   4   17.42    0.81
   3  -5   4   19.39    0.83
   3  -5  -4   18.18    0.80
   5   0  -5    2.51    0.68
  -5   0   5    2.98    0.39
  -5   0   5    2.92    0.43
  -5   0  -5    3.05    0.31
  -5   0  -5    2.63    0.31
   5   0  -5    2.85    0.42
   5   0  -5    2.83    0.65
   1  -6  -4  407.08   12.15
  -1   6  -4  407.69   12.33
  -1  -6  -4  402.93   12.19
   1  -6   4  414.78   12.38
  -1   6  -4  394.09   11.85
  -1  -6   4  397.77   11.93
   1   6  -4  395.95   12.15
   1  -6  -4  416.50   12.55
  -1  -6  -4  403.48   12.16
   1   6   4  424.25   12.82
  -1  -6   4  381.61   11.93
  -1   6  -4  408.78   12.26
  -1  -6  -4  387.92   11.52
   1  -6   4  384.99   11.46
  -1   6  -4  377.14   11.52
   1   6  -4  402.31   12.23
  -1  -6   4  397.75   11.88
   4   4  -4  523.91   16.41
  -4  -4  -4  521.77   16.25
  -4   4   4  535.85   16.51
  -4   4  -4  501.90   14.89
   4  -4   4  509.76   15.08
  -4   4   4  504.08   15.20
  -4   4   4  524.00   16.53
  -4  -4   4  500.88   15.06
  -4  -4   4  548.53   17.02
  -4  -4   4  515.69   15.46
   4  -4   4  510.80   15.65
  -4  -4  -4  516.54   15.49
   4   4  -4  507.38   15.57
  -4   4  -4  515.07   15.37
   4  -4   4  527.28   16.39
  -4   4  -4  524.87   16.28
  -4   4   4  528.24   16.36
  -4  -4  -4  502.49   14.92
   4  -4  -4  536.63   16.67
  -4  -4  -4  493.17   15.12
   4  -4  -4  514.47   15.33
  -4  -4   4  517.78   16.67
   5  -2  -4  109.79    3.56
  -5  -2  -4  125.92    4.02
  -5   2  -4  121.70    3.83
   5  -2   4  125.27    3.98
   5  -2   4  120.25    4.26
  -5  -2   4  124.14    3.97
   5   2  -4  114.84    4.15
   5   2  -4  126.14    4.35
  -5   2   4  121.83    4.07
  -5  -2   4  122.11    4.06
  -5   2   4  121.72    3.84
  -5   2   4  113.75    3.94
  -5  -2  -4  122.78    3.82
  -5  -3   2   59.50    2.25
  -5   3   2   62.38    2.49
   5  -3  -2   63.78    2.19
   5   3  -2   61.82    2.21
  -5   3   2   64.88    2.13
  -5  -3   2   63.75    2.47
  -5  -3  -2   61.63    2.55
  -5  -3   2   64.01    2.23
   5  -3   2   59.67    2.28
   5  -3  -2   61.63    2.14
  -5  -3  -2   65.18    2.55
  -5   3   2   65.15    2.45
  -5   3  -2   62.48    2.08
  -5  -3   2   62.64    2.31
  -5  -3  -2   60.68    2.40
  -5   3  -2   63.87    2.15
  -5   3   2   63.35    2.14
   5  -3   2   65.15    2.21
  -5  -3  -2   63.83    2.22
   0  -2  10  144.81    4.47
   0  -2  10  143.57    4.51
   0  -2 -10  146.37    4.59
   0  -2 -10  155.50    5.08
   0   2 -10  136.00    4.47
   0   2  10  141.59    4.37
   0  -2  10  133.64    4.34
   0   2  10  144.98    4.54
   0  -2 -10  129.90    4.22
   0   2 -10  139.43    4.90
   0  -2 -10  142.92    4.52
   5   1  -5   48.47    2.17
   5  -1  -5   47.22    2.51
  -5   1  -5   48.05    1.68
  -5  -1   5   50.59    1.91
   5  -1   5   49.70    1.77
  -5  -1  -5   47.82    1.71
  -5   1   5   49.59    1.75
  -5   1   5   50.85    1.96
  -5  -1   5   46.09    1.82
  -5   1   5   48.54    1.94
   5   1  -5   44.92    2.36
   5   1  -5   45.20    2.28
  -5  -1   5   47.82    1.74
   5  -1  -5   48.71    1.78
   5   1  -5   48.08    1.74
  -5   1  -5   46.38    1.59
  -5  -1  -5   49.62    1.68
   5  -1  -5   51.15    2.03
   0   5   7  357.88   10.77
   0  -5   7  350.48   10.57
   0   5  -7  368.26   11.22
   0  -5  -7  364.46   10.95
   0   5  -7  362.93   11.10
   0  -5   7  348.73   11.07
   0  -5   7  345.86   10.34
   0  -5  -7  358.08   10.90
   0   5  -7  368.77   11.14
   0  -5  -7  374.23   11.17
   3   0  -9   91.47    3.35
  -3   0  -9   79.31    3.09
   3   0  -9   89.34    3.21
   3   0  -9   86.40    3.12
  -3   0   9   84.91    2.78
   3   0  -9   84.70    2.82
  -3   0   9   86.76    2.85
  -3   0  -9   83.55    2.72
   3   0   9   89.08    2.82
   2  -5  -6   45.75    1.92
  -2  -5  -6   46.46    1.69
   2   5  -6   51.57    1.98
  -2   5  -6   46.36    1.77
  -2   5   6   47.97    1.71
   2  -5  -6   48.26    1.68
  -2  -5  -6   47.47    1.97
   2   5  -6   45.84    1.81
  -2  -5   6   51.74    2.38
   2  -5   6   48.65    2.21
  -2  -5   6   44.23    1.59
   2   5  -6   47.04    1.90
  -2   5  -6   48.87    1.75
  -2   5  -6   48.81    1.86
  -2  -5  -6   48.34    1.70
   2  -5   6   49.95    1.74
  -2  -5  -6   47.62    1.61
  -2  -5   6   48.09    1.80
   2  -5   6   43.48    1.49
   2   5   6   46.83    1.81
  -2   6   3  110.69    3.95
  -2  -6   3  106.21    3.44
  -2   6   3   93.00    3.23
  -2  -6  -3  111.83    3.66
   2  -6   3  110.50    3.79
  -2  -6  -3  108.16    3.48
  -2   6   3  114.29    3.68
  -2   6  -3  100.20    3.47
   2   6  -3  115.42    3.74
   2   6  -3  110.90    3.92
   2  -6  -3  112.90    3.56
   2  -6   3  110.63    3.51
  -2  -6  -3  108.78    3.59
  -2  -6   3  108.17    3.86
   2  -6   3  107.80    3.37
  -2   6  -3  104.14    3.41
  -2   6  -3  104.94    3.39
   2   6  -3  105.47    3.67
   4   3  -6  148.86    4.99
  -4  -3  -6  154.82    4.74
  -4  -3   6  146.43    4.69
  -4   3  -6  147.98    4.64
  -4  -3  -6  148.96    4.68
   4  -3  -6  154.92    5.25
   4   3  -6  146.66    4.95
  -4   3   6  151.68    4.85
   4  -3   6  141.70    4.45
   4  -3  -6  152.02    4.76
  -4  -3  -6  145.68    4.61
   4  -3   6  149.90    5.19
  -4  -3   6  152.75    5.07
  -4   3   6  151.52    4.86
   4  -3   6  150.12    4.63
  -4   3  -6  138.47    4.45
  -4  -3   6  140.25    4.49
  -4  -3  -6  149.96    4.75
   4   3  -6  148.16    4.98
  -4   2   7  317.27    9.69
  -4  -2   7  310.74    9.51
  -4  -2  -7  292.94    9.15
  -4  -2   7  320.95    9.71
   4   2  -7  305.35    9.76
  -4   2   7  300.96    9.17
   4   2  -7  322.24   10.44
   4  -2  -7  316.78   10.02
  -4   2   7  298.65    9.02
  -4   2  -7  292.79    9.02
  -4  -2   7  299.06    9.12
   4  -2   7  264.94    8.54
  -4  -2  -7  307.22    9.32
  -4   2  -7  296.41    8.97
   4  -2  -7  304.70    9.25
  -4   2  -7  316.22    9.49
   4  -2   7  300.75    9.09
  -4  -2  -7  305.34    9.14
   4  -2   7  310.95    9.28
  -3  -1   9   61.82    2.12
   3   1  -9   60.42    2.29
   3  -1  -9   66.06    2.50
   3   1  -9   61.07    2.11
   3  -1  -9   61.32    2.13
   3  -1  -9   65.52    2.53
   3   1  -9   61.51    2.33
  -3  -1  -9   64.64    2.14
   3  -1   9   64.79    2.12
   3   1   9   64.44    2.10
   3  -1  -9   63.03    2.38
  -3  -1  -9   62.27    2.48
   3   1  -9   67.46    2.75
  -3   1  -9   59.58    2.03
  -3   1   9   61.85    2.11
  -3  -1   9   66.17    2.26
  -3   1   9   63.13    2.13
  -3   1  -9   59.80    2.48
   1  -2  10   81.39    2.69
   1  -2 -10   79.10    2.67
   1   2  10   83.33    2.65
   1  -2 -10   84.11    2.96
   1  -2 -10   79.80    2.73
   1   2 -10   78.38    2.72
  -1   2  10   82.30    2.64
  -1   2  10   76.20    2.51
   1  -2 -10   81.24    2.81
  -1   2 -10   75.73    3.02
  -1  -2 -10   84.29    2.99
  -1  -2  10   90.00    3.19
  -1   2 -10   81.62    2.70
  -1  -2 -10   83.38    2.73
  -1  -2  10   81.90    2.65
  -1  -2  10   80.20    2.68
   1  -2  10   79.38    2.85
   1   2  10   80.87    2.72
   1  -2  10   81.86    2.62
   2   0 -10  170.94    5.33
  -2   0 -10  169.15    5.22
  -2   0  10  175.94    5.41
  -2   0 -10  159.14    5.43
  -2   0  10  173.78    5.36
   2   0  10  170.93    5.20
   2   0 -10  170.23    5.44
   2   0 -10  167.66    5.41
  -5   3   3   68.17    2.51
   5  -3   3   64.64    2.21
  -5   3   3   66.30    2.22
  -5   3  -3   67.62    2.21
  -5  -3   3   58.14    2.28
   5  -3   3   57.62    2.40
   5  -3  -3   67.75    2.31
   5   3  -3   68.67    2.46
   5   3  -3   61.19    2.51
  -5  -3  -3   68.97    2.36
  -5  -3   3   65.65    2.29
  -5  -3  -3   62.10    2.05
  -5  -3  -3   64.00    2.53
  -5   3  -3   68.55    2.29
  -5  -3   3   64.82    2.39
  -5   3   3   68.29    2.23
  -5   3   3   72.29    2.73
   0   6  -5   13.04    0.75
   0  -6  -5   13.49    0.75
   0  -6   5   12.46    0.65
   0  -6  -5   12.51    0.63
   0   6  -5   12.44    0.72
   0  -6   5   11.38    1.11
   0  -6   5   12.41    0.61
   0   6   5   12.48    0.71
  -1  -5   7    5.83    0.46
  -1  -5  -7    5.41    0.40
   1   5  -7    4.71    0.49
  -1   5  -7    5.07    0.45
  -1  -5  -7    5.97    0.46
  -1   5  -7    5.51    0.58
  -1  -5   7    5.04    0.93
  -1  -5   7    6.69    0.45
   1  -5   7    7.45    0.44
   1   5  -7    5.89    0.53
   1  -5  -7    5.74    0.41
   1  -5   7    5.84    0.43
  -1   5   7    5.89    0.44
   1  -5   7    5.72    0.94
   1  -5  -7    5.35    0.52
   1   5   7    5.69    0.48
   1  -5  -7    5.60    0.46
  -4  -5   0  155.85    5.02
   4  -5   0  168.27    5.19
  -4   5   0  161.36    5.02
  -4  -5   0  155.85    4.98
  -4  -5   0  165.35    5.49
   4   5   0  157.41    4.91
   4  -5   0  161.24    5.17
  -4   5   0  154.69    4.79
  -4  -5   0  172.11    5.56
  -4   5   0  159.66    5.32
  -4  -5   0  162.14    5.07
  -4   5  -1   15.74    0.74
  -4   5   1   16.30    0.77
   4  -5   1   19.00    0.83
   4  -5   1   15.76    0.90
   4  -5  -1   16.02    0.84
  -4  -5   1   16.50    0.90
  -4  -5  -1   15.43    0.91
  -4  -5  -1   16.34    1.01
  -4  -5   1   15.74    0.86
  -4  -5   1   17.11    1.23
  -4   5   1   15.87    0.69
  -4   5  -1   16.43    0.72
   4  -5  -1   16.98    0.78
  -4  -5   1   16.63    0.88
   4   5  -1   16.18    1.13
   4   5   1   17.13    0.79
   4   5  -1   17.05    0.81
  -4  -5   1   15.57    0.81
  -4  -5  -1   16.03    0.84
  -4   5   1   16.04    0.94
  -4  -5  -1   15.48    0.87
   2  -1  10   82.13    2.62
  -2  -1 -10   82.17    2.68
   2  -1 -10   79.80    2.68
  -2   1  10   81.44    2.65
  -2  -1  10   80.40    2.66
   2   1 -10   79.27    2.65
   2  -1 -10   78.73    2.78
   2  -1 -10   80.22    2.80
   2   1 -10   80.82    2.84
  -2   1  10   83.51    2.71
  -2  -1  10   80.69    2.64
   2   1 -10   83.72    2.91
  -2   1 -10   84.93    2.78
  -2   1 -10   78.14    3.08
  -2  -1 -10   78.07    2.92
   2   1  10   83.61    2.66
  -3  -3   8   75.58    2.79
  -3   3  -8   74.35    2.45
  -3   3   8   72.99    2.44
  -3   3  -8   72.71    2.64
   3  -3   8   77.37    2.97
   3   3  -8   77.73    2.98
   3  -3  -8   75.38    2.77
   3  -3  -8   74.76    2.49
   3  -3  -8   73.56    2.88
   3  -3   8   78.43    2.57
   3   3  -8   74.77    2.72
  -3   3   8   74.88    2.47
  -3   3   8   75.61    2.58
  -3  -3   8   77.01    2.60
  -3  -3  -8   78.42    2.53
   3   3  -8   73.67    2.66
   3  -5   5   71.12    2.88
   3  -5  -5   74.08    2.59
   3   5  -5   74.23    2.80
  -3   5   5   71.27    2.48
  -3  -5   5   70.27    2.43
  -3   5  -5   68.68    2.37
  -3   5  -5   73.35    2.52
  -3  -5  -5   72.54    2.79
   3   5  -5   69.63    2.67
  -3  -5  -5   68.16    2.34
   3  -5   5   73.78    2.42
  -3  -5  -5   68.10    2.38
  -3  -5   5   65.24    2.33
  -3  -5  -5   70.09    2.35
  -3  -5   5   66.00    2.78
  -3   5   5   70.92    2.44
   3   5  -5   71.57    2.53
  -3  -5   5   68.99    2.44
  -3   5  -5   71.59    2.38
  -3   5   5   66.34    2.19
   3  -5   5   68.53    2.30
   2  -3   9  128.31    4.19
  -2   3   9  124.89    4.08
  -2   3  -9  129.69    4.57
   2   3  -9  130.52    4.46
   2  -3  -9  125.29    4.32
   2  -3   9  130.98    4.62
  -2  -3   9  130.94    4.55
   2  -3   9  104.71    4.31
   2  -3  -9  127.77    4.48
   2   3  -9  129.38    4.38
  -2   3   9  128.10    4.15
  -2   3  -9  133.79    4.37
  -2  -3  -9  129.94    4.21
   2  -3  -9  132.17    4.32
  -2  -3   9  130.11    4.30
  -2  -4   8  110.27    3.70
   2  -4  -8  106.31    3.51
  -2  -4  -8  107.07    3.54
  -2  -4  -8  101.73    3.37
   2   4  -8  109.20    3.76
   2   4  -8  106.40    3.75
  -2   4   8   91.50    3.00
   2  -4   8  110.18    4.17
  -2   4  -8  111.80    3.90
   2  -4  -8  109.45    3.85
  -2  -4   8  106.74    3.94
  -2   4   8  109.59    3.62
   2  -4   8  110.19    3.63
   2   4   8  106.23    3.67
   4   0  -8  178.85    6.14
   4   0  -8  180.74    6.36
  -4   0  -8  159.19    5.61
  -4   0   8  171.81    5.58
   4   0   8  171.57    5.42
  -4   0  -8  176.22    5.59
   4   0  -8  170.56    5.54
   4   0  -8  175.58    6.35
  -4   0   8  170.31    5.48
   1   6   5  156.03    5.31
  -1   6  -5  156.30    5.21
  -1   6   5  156.58    5.10
  -1  -6   5  158.32    5.16
  -1   6  -5  148.40    4.92
   1   6  -5  159.69    5.31
  -1  -6   5  150.06    4.86
   1   6  -5  150.00    5.11
   1  -6  -5  159.23    5.10
  -1   6  -5  161.53    5.27
   1  -6   5  151.74    4.87
  -1  -6   5  165.72    5.83
  -1  -6  -5  156.67    5.07
   1  -6  -5  154.21    5.09
  -1  -6  -5  163.13    5.32
   1  -6   5  160.09    5.16
  -4   4  -5   15.90    0.81
   4  -4  -5   16.61    0.81
   4   4  -5   17.96    1.12
  -4   4   5   16.66    0.90
  -4  -4   5   18.46    0.92
  -4  -4  -5   16.39    0.82
  -4   4  -5   16.42    0.79
  -4   4   5   16.80    0.80
   4  -4   5   16.41    0.76
  -4  -4  -5   15.39    1.01
   4   4  -5   15.58    1.02
  -4   4   5   15.85    0.88
  -4   4  -5   16.69    0.76
  -4  -4  -5   17.08    0.74
   4  -4   5   15.81    0.70
  -4   4   5   16.05    0.70
  -4  -4   5   16.02    1.15
   4  -4   5   16.51    1.26
   4   4  -5   17.43    1.02
  -4  -4  -5   15.20    0.79
  -5   2  -5  131.14    4.31
  -5   2   5  135.71    4.42
  -5  -2  -5  134.55    4.44
   5  -2   5  133.39    4.38
   5  -2   5  130.98    4.57
  -5  -2   5  133.69    4.40
   5   2  -5  133.37    4.76
  -5  -2  -5  135.70    4.36
   5   2  -5  134.42    4.84
  -5   2   5  131.47    4.48
  -5   2   5  130.36    4.47
   2  -6   4  583.36   18.35
  -2   6  -4  574.36   17.88
  -2  -6   4  555.92   17.73
   2  -6   4  552.69   17.02
  -2  -6   4  546.07   16.94
   2   6  -4  592.11   18.65
   2  -6   4  585.61   18.07
  -2   6  -4  566.08   17.52
   2   6  -4  575.98   18.23
  -2  -6  -4  567.98   17.58
   2   6  -4  594.03   18.45
  -2  -6  -4  568.37   17.63
  -2   6  -4  569.33   17.67
   3  -4   7   61.09    2.12
  -3  -4   7   61.58    2.24
   3  -4  -7   59.72    2.41
  -3  -4   7   58.45    2.15
  -3   4   7   60.18    2.20
   3   4  -7   58.14    2.28
  -3  -4  -7   59.45    2.11
  -3   4  -7   56.70    2.15
   3   4  -7   60.48    2.41
  -3  -4  -7   58.83    2.08
   3  -4  -7   60.53    2.14
  -3   4  -7   61.53    2.28
  -3   4   7   59.24    2.08
  -3   4   7   58.76    2.10
   3   4  -7   57.67    2.26
  -3   4  -7   58.44    2.06
  -3  -4  -7   57.27    1.96
  -3  -4   7   57.98    2.44
   3  -4   7   61.81    2.70
   4  -5   2  254.30    8.23
   4  -5   2  238.07    7.45
  -4   5   2  249.96    7.83
  -4   5  -2  244.37    7.68
  -4  -5  -2  236.11    7.73
   4   5  -2  234.50    7.91
  -4  -5   2  251.65    8.00
   4  -5   2  261.15    8.21
  -4  -5   2  241.34    7.81
  -4   5   2  238.69    7.56
  -4   5  -2  249.90    7.91
  -4  -5  -2  245.21    7.86
  -4  -5   2  255.29    8.59
  -4   5   2  250.62    8.15
  -4  -5   2  228.31    7.38
  -4  -5  -2  233.49    7.72
  -4   5  -2  235.49    7.50
   4  -5  -2  251.75    8.01
   4   5  -2  252.82    8.05
  -4  -5  -2  247.39    8.02
   3  -6   0    4.88    0.35
  -3  -6   0    5.10    0.63
   3  -6   0    4.87    0.53
   3   6   0    5.16    0.44
  -3   6   0    4.40    0.53
  -3   6   0    5.58    0.46
   3  -6   0    4.65    0.39
   3   6   0    4.67    0.71
  -3  -6   0    4.95    0.45
  -3   6   0    4.95    0.37
  -5   0  -6  581.39   17.97
   5   0  -6  619.09   21.27
  -5   0   6  521.45   16.22
   5   0  -6  545.17   19.65
  -5   0   6  574.47   17.93
  -5   0  -6  549.74   16.94
   5   0  -6  566.33   18.00
   6   0   0   63.12    2.24
  -6   0   0   63.05    2.22
  -4   1   8  185.63    6.10
  -4   1   8  191.69    6.12
  -4  -1   8  188.17    6.04
  -4   1  -8  179.14    6.08
   4   1  -8  177.48    5.75
   4  -1  -8  192.52    7.25
   4   1  -8  194.05    6.64
   4  -1  -8  175.86    5.71
   4  -1  -8  188.03    7.14
   4  -1  -8  186.22    6.24
  -4  -1  -8  186.80    5.96
  -4   1  -8  193.56    6.14
  -4  -1   8  184.46    5.97
   4   1  -8  193.47    6.69
   4   1  -8  185.55    6.45
  -4   1   8  188.63    6.09
  -3   6  -1   38.91    1.46
  -3   6   1   40.50    1.50
  -3  -6   1   39.34    1.56
   3  -6   1   39.40    1.41
  -3  -6   1   39.80    1.78
  -3  -6  -1   41.31    1.74
   3  -6   1   37.68    1.59
   3   6  -1   40.54    1.56
  -3   6  -1   39.37    1.51
  -3   6  -1   39.15    1.78
  -3  -6  -1   38.03    1.54
  -3   6   1   39.59    1.69
   3   6  -1   40.94    1.89
  -3  -6  -1   38.17    1.51
   3  -6  -1   42.12    1.69
  -3   6  -1   36.69    1.42
  -3   6   1   35.64    1.39
   3  -6   1   41.77    1.54
   3   6   1   40.38    1.52
   6   0  -1   45.09    1.92
   6   0  -1   43.13    1.64
   6   0  -1   46.30    1.74
  -6   0  -1   46.26    1.71
   6   0   1   48.32    1.78
  -6   0   1   45.27    1.69
   0   4  -9   95.34    3.26
   0  -4   9   87.67    3.04
   0   4  -9   88.23    3.10
   0  -4  -9   89.92    3.02
   0   4   9   95.36    3.22
   0  -4   9   95.37    3.25
   0  -4  -9   97.75    3.37
  -3  -2   9  360.22   11.26
   3  -2   9  377.79   12.05
  -3  -2   9  373.85   11.70
  -3   2   9  359.03   11.19
   3   2  -9  394.05   12.80
  -3  -2  -9  369.29   11.77
   3   2  -9  372.51   11.95
   3  -2  -9  380.24   12.22
   3  -2  -9  371.69   11.64
   3   2   9  366.42   11.36
  -3  -2  -9  381.79   11.86
  -3   2  -9  374.53   11.70
  -3   2   9  367.72   11.49
  -3   2  -9  354.04   11.41
   3  -2  -9  364.46   11.92
  -5  -3   4  692.81   21.38
  -5   3  -4  689.07   21.18
  -5  -3  -4  687.47   21.28
  -5  -3  -4  628.68   19.58
  -5   3   4  677.57   20.84
  -5   3   4  694.25   21.66
   5  -3   4  696.19   21.49
  -5  -3   4  667.13   20.84
   5   3  -4  712.56   22.20
  -5  -3   4  676.17   21.10
   5  -3  -4  691.29   21.32
  -5  -3  -4  689.98   21.17
  -5   3   4  683.30   21.42
   5   3  -4  659.14   20.88
  -5   3   4  677.12   20.87
  -5   3  -4  687.01   21.21
  -5  -3  -4  635.24   20.10
   5  -3   4  649.45   20.74
   5   3  -4  670.19   21.21
   0   7   0    0.31    0.32
   0   7   0   -0.00    0.26
   0  -7   0   -0.36    0.48
  -5  -1   6 1049.21   42.44
  -5   1  -6 1096.81   44.16
  -5   1   6 1022.19   31.48
   5   1  -6 1070.05   43.76
   5  -1  -6 1042.50   50.54
   5   1  -6  988.83   33.70
   5  -1   6 1058.05   42.70
  -5   1  -6 1047.44   42.20
   5  -1  -6 1026.39   31.96
   5   1  -6 1040.71   47.49
  -5   1   6 1044.24   42.36
  -5  -1  -6 1014.28   31.18
  -5  -1  -6 1017.71   31.22
   0   0 -11    0.13    0.33
   0   0  11   -0.21    0.21
   0   0 -11   -0.12    0.26
   0   0  11    0.10    0.18
  -6   1   0    0.31    0.29
  -6   1   0    0.16    0.46
   6  -1   0    0.18    0.34
   6  -1   0    0.11    0.50
   6   1   0    0.21    0.32
  -6   1   0    0.15    0.23
  -6  -1   0    0.40    0.31
   6  -1   0    0.20    0.81
   0   7   1  376.28   11.91
   0   7  -1  364.81   11.59
   0  -7   1  379.03   12.03
   0  -7   1  354.68   11.06
   0  -7  -1  379.99   12.01
   0   7  -1  353.69   11.26
   0   7   1  376.96   12.09
   5  -4   0   66.77    2.32
  -5   4   0   57.16    2.04
  -5  -4   0   58.66    2.30
  -5  -4   0   64.04    2.29
  -5  -4   0   60.59    2.37
  -5   4   0   59.18    2.04
  -5   4   0   65.19    2.59
   5  -4   0   63.18    2.33
  -5  -4   0   61.52    2.64
   5   4   0   64.14    2.26
  -6   1   1   46.48    1.66
   6  -1  -1   50.49    1.87
   6  -1   1   51.40    1.88
   6   1  -1   50.17    1.84
   6   1   1   48.59    1.79
  -6   1   1   50.18    1.81
  -6   1  -1   47.95    1.75
   6  -1  -1   42.89    1.66
  -6   1  -1   48.87    1.72
  -6   1   1   48.56    2.08
  -6  -1  -1   47.06    1.67
   6   1  -1   48.55    1.84
  -6  -1   1   48.14    1.78
  -6  -1  -1   46.97    1.74
   0   3  10   58.08    1.97
   0  -3 -10   56.64    2.06
   0  -3  10   52.22    1.92
   0   3 -10   58.97    2.21
   0  -3 -10   59.12    2.18
   0   3 -10   57.29    2.11
   0   3  10   57.24    2.04
   0  -3  10   57.32    2.11
   0  -3 -10   56.83    2.02
  -3   6   2   98.87    3.32
  -3  -6   2   95.46    3.26
  -3  -6  -2   94.95    3.32
   3   6  -2  103.65    3.81
   3  -6   2  101.97    3.37
   3   6  -2  103.02    3.49
   3  -6  -2  103.92    3.54
  -3  -6  -2   99.09    3.46
   3  -6   2   96.93    3.44
  -3  -6   2   99.95    3.71
  -3   6   2   95.98    3.40
   3  -6   2   96.37    3.15
  -3   6  -2   94.34    3.16
  -3   6   2   98.71    3.29
  -3   6  -2   88.81    3.13
  -3  -6  -2   96.32    3.28
  -3  -6   2   97.07    3.34
  -3   6  -2   95.50    3.22
  -6   0  -2  144.49    4.65
  -6   0  -2  155.71    5.03
  -6   0   2  144.12    4.70
   6   0   2  151.84    4.93
   6   0  -2  157.00    5.52
  -5   4  -1  108.05    3.57
  -5   4   1  112.74    3.71
   5  -4   1  110.44    3.65
   5  -4  -1  108.36    3.60
  -5  -4   1  116.88    3.90
  -5  -4   1  106.42    3.75
  -5  -4  -1  109.34    3.90
  -5   4   1  104.15    3.74
   5  -4  -1  106.92    3.66
  -5  -4  -1  110.49    4.11
  -5  -4  -1   99.10    3.60
  -5  -4   1  105.11    3.99
   5  -4   1  111.14    3.84
   5   4  -1  115.46    3.86
   5   4   1  106.98    3.57
  -5   4   1  112.56    3.65
  -5   4  -1  110.60    4.03
  -5   4  -1  112.92    3.67
  -5  -4  -1  109.04    3.68
   2  -2 -10  435.54   13.86
   2  -2  10  506.06   15.91
   2   2  10  501.66   15.47
  -2   2  10  499.71   15.46
  -2   2  10  473.99   14.68
   2  -2 -10  476.92   14.82
  -2  -2  10  475.08   14.78
  -2  -2  10  463.06   14.37
  -2   2 -10  483.76   15.00
   2  -2 -10  481.41   15.16
   2   2 -10  495.28   15.56
  -2   2 -10  470.01   15.06
  -2  -2 -10  474.24   14.95
  -2  -2 -10  489.92   15.17
   4  -5   3  202.14    6.37
   4   5  -3  224.14    7.21
  -4  -5  -3  201.03    6.80
  -4   5  -3  208.63    6.66
  -4   5   3  217.52    6.91
  -4   5   3  204.79    6.89
  -4  -5   3  219.84    7.04
   4  -5   3  218.29    6.91
  -4  -5  -3  208.34    6.71
  -4  -5  -3  207.22    6.87
   4  -5   3  202.86    6.78
   4  -5  -3  219.74    7.03
  -4   5   3  206.58    6.78
  -4   5  -3  207.58    6.63
  -4   5   3  212.43    6.70
  -4  -5  -3  213.95    6.98
  -4  -5   3  214.37    7.37
  -4  -5   3  211.18    6.86
   4   5  -3  212.84    7.21
  -4   5  -3  208.58    6.61
   0   1 -11  343.64   10.80
   0   1  11  368.16   11.41
   0  -1  11  360.92   11.21
   0  -1 -11  354.01   11.13
   0  -1 -11  349.84   11.09
   0   1 -11  340.56   10.85
   0   1  11  361.79   11.29
   0  -1  11  335.19   10.51
  -2   5  -7   50.85    1.96
  -2  -5   7   52.54    2.41
  -2  -5  -7   50.93    1.86
   2  -5  -7   50.65    1.81
   2  -5   7   52.50    2.41
   2   5   7   48.97    1.91
  -2  -5   7   49.08    1.89
   2   5  -7   49.22    2.00
   2  -5  -7   46.08    1.94
  -2   5   7   52.90    1.90
  -2  -5  -7   51.17    1.84
   2  -5   7   51.56    1.84
  -2  -5   7   48.35    1.85
  -2   5  -7   49.36    1.81
  -2  -5  -7   51.00    1.77
   4  -3   7   94.19    3.16
  -4  -3   7   95.84    3.27
  -4  -3  -7   91.33    3.11
   4   3  -7   89.70    3.34
   4  -3   7   87.37    3.41
  -4  -3  -7   91.62    3.01
  -4   3  -7   88.25    3.10
  -4  -3  -7   87.94    2.99
   4   3  -7   88.58    3.30
  -4   3   7   91.76    3.18
   4   3  -7   90.10    3.39
  -4  -3   7   91.04    3.30
  -4   3   7   92.00    3.16
  -4   3   7   92.01    3.07
   4  -3  -7   94.98    3.53
   1   7   0   12.82    0.80
  -1   7   0   14.08    0.78
  -1   7   0   14.34    0.79
  -1  -7   0   14.00    0.78
  -1  -7   0   13.42    0.90
   1   7   0   14.92    0.96
   1  -7   0   14.01    0.84
   1   0  11  128.63    5.51
   1   0  11  101.10    4.33
  -1   0  11  128.95    5.38
   1   0 -11  127.46    5.44
   1   0  11  133.32    5.52
  -1   0 -11  126.04    5.31
   1   0 -11  127.47    5.42
  -1   0  11  126.34    5.28
  -1   0 -11  120.54    5.41
   0   6   6    8.03    0.59
   0  -6  -6    7.98    0.53
   0  -6   6    7.73    0.54
   0  -6   6    7.88    0.51
   0   6  -6    8.05    0.61
   0  -6  -6    7.37    0.59
   0   6  -6    7.83    0.61
   0  -6   6    9.37    1.17
   0  -7  -2    9.07    0.71
   0  -7   2    8.00    0.81
   0   7  -2    8.12    0.70
   0   7  -2    8.47    0.70
   0   7   2    8.94    0.80
   0   7  -2    8.40    0.65
   0  -7   2    7.68    0.50
  -1  -7   1   20.92    1.27
  -1   7   1   20.26    1.15
   1  -7  -1   18.93    1.10
  -1   7  -1   20.30    1.12
   1  -7   1   16.34    1.01
  -1  -7  -1   19.19    1.15
   1   7   1   19.86    1.28
   1   7  -1   19.73    1.21
  -1   7  -1   19.70    1.11
  -1  -7   1   19.66    1.00
  -1   7   1   19.98    1.10
  -6  -1   2  469.27   19.06
   6  -1  -2  449.01   19.11
  -6  -1  -2  453.60   18.44
  -6   1   2  481.55   19.85
   6  -1  -2  469.94   19.35
  -6   1  -2  446.21   18.09
  -6  -1  -2  453.96   18.40
   6   1  -2  494.80   20.26
   6  -1   2  477.90   19.41
  -6   1  -2  462.62   18.77
  -6   1   2  474.42   19.26
  -1   3  10  281.41   11.46
  -1  -3  10  273.05   11.24
   1  -3 -10  283.06   11.61
  -1   3  10  295.16   12.07
  -1  -3  10  292.35   12.17
   1  -3 -10  284.10   11.76
  -1   3 -10  291.85   11.98
   1   3  10  297.43   12.09
   1  -3  10  287.36   11.76
  -1  -3 -10  286.92   11.74
   1  -3  10  285.64   11.90
   1   3 -10  267.32   11.08
   1   3 -10  295.34   12.16
   1   3  10  299.72   12.32
   1  -3 -10  278.56   11.51
   1  -3  10  272.08   11.20
   0  -5   8  394.55   16.09
   0   5   8  401.30   16.36
   0   5  -8  398.53   16.33
   0  -5  -8  386.50   15.70
   0  -5  -8  365.78   15.09
  -5  -4   2  364.15   15.01
  -5  -4  -2  370.92   15.16
  -5  -4   2  376.45   15.38
   5  -4   2  363.37   15.01
  -5  -4   2  349.90   14.65
   5  -4  -2  304.06   12.52
  -5   4   2  367.86   14.93
  -5   4   2  347.71   14.37
  -5  -4  -2  336.91   13.87
  -5   4  -2  358.62   14.60
   5  -4   2  372.08   15.14
  -5   4   2  359.63   14.63
  -5   4   2  351.50   14.67
  -5  -4  -2  360.24   14.92
  -5   4  -2  363.67   14.77
  -5  -4  -2  338.92   14.09
   5   4  -2  368.10   15.05
  -4   2  -8  113.56    4.97
  -4   2   8  124.83    5.23
  -4   2   8  127.49    5.39
  -4  -2  -8  123.95    5.15
  -4   2  -8  128.87    5.37
   4  -2  -8  145.20    6.22
   4   2  -8  132.12    5.92
   4  -2   8  127.44    5.51
   4   2  -8  129.37    5.83
  -4  -2   8  118.94    5.02
  -4   2   8  128.09    5.44
   4  -2   8  119.68    5.06
   4  -2  -8  122.29    5.50
   4  -2  -8  110.76    5.43
  -1   1 -11   32.93    1.56
   1  -1 -11   33.53    1.65
  -1   1  11   32.84    1.52
   1  -1  11   31.39    1.48
   1  -1  11   31.77    1.53
   1   1  11   27.09    1.34
   1  -1 -11   34.13    1.70
   1   1 -11   32.34    1.63
  -1  -1  11   33.37    1.56
   1   1 -11   33.29    1.64
  -1   1 -11   32.07    1.91
  -1  -1 -11   31.04    1.74
   1   1  11   32.77    1.48
   1  -1  11   36.15    1.63
  -1   1  11   34.83    1.59
  -1  -1  11   33.91    1.55
  -1  -1 -11   34.10    1.60
   2  -6   5    7.75    0.97
   2  -6   5    7.15    0.46
  -2   6  -5    7.80    0.62
  -2   6   5    6.85    0.54
  -2  -6   5    7.84    0.55
   2   6   5    7.22    0.63
  -2   6  -5    6.82    0.52
  -2  -6  -5    7.91    0.54
   2  -6   5    7.83    0.53
   2   6  -5    7.75    0.70
   2   6  -5    7.80    0.72
  -2  -6   5   10.19    1.21
  -2  -6  -5    8.54    0.63
   3  -5   6   38.71    1.76
  -3   5   6   38.27    1.83
  -3  -5  -6   36.51    1.93
  -3  -5  -6   37.62    1.68
   3  -5   6   35.24    1.58
  -3  -5  -6   38.12    1.79
   3  -5  -6   37.88    2.04
  -3   5  -6   36.29    1.75
   3  -5  -6   39.92    1.86
   3   5  -6   38.00    1.90
  -3   5  -6   39.67    1.82
  -3  -5   6   36.68    1.73
   3  -5   6   39.13    2.23
   3   5  -6   37.20    1.95
  -3   5  -6   39.58    1.89
  -3  -5  -6   36.65    1.70
  -3   5   6   35.90    1.67
  -3  -5   6   38.91    1.84
  -3  -5   6   36.89    2.14
  -3  -6   3   41.63    2.31
  -3  -6  -3   41.10    1.97
   3   6  -3   43.53    2.03
   3  -6  -3   44.60    2.09
  -3   6  -3   37.56    1.76
  -3   6   3   41.71    2.00
   3  -6   3   41.81    2.12
  -3  -6   3   41.53    1.96
   3   6  -3   40.42    2.15
  -3   6  -3   40.96    1.91
  -3  -6  -3   40.75    1.89
   3  -6   3   42.40    1.91
   3   6  -3   41.49    2.14
  -3  -6  -3   40.87    1.98
  -3  -6   3   40.03    1.88
  -3   6   3   40.49    1.86
  -3   6  -3   41.98    1.91
   3  -6   3   40.32    1.79
  -3   6   3   41.44    1.91
  -6   0  -3   25.23    1.29
   6   0  -3   25.89    1.62
  -6   0   3   25.83    1.32
  -6   0  -3   26.15    1.28
   6   0   3   24.65    1.23
   1  -6   6  289.50   12.23
   1  -6   6  286.92   11.71
  -1  -6  -6  290.80   11.91
   1  -6  -6  307.85   12.62
  -1   6  -6  276.95   11.49
  -1  -6   6  300.16   12.71
   1   6  -6  289.24   12.04
  -1  -6  -6  305.09   12.47
  -1   6   6  292.26   11.98
   1  -6   6  293.02   12.00
   1   6  -6  306.15   12.66
  -1  -6   6  303.79   12.49
   1   6   6  291.57   12.04
  -1   6  -6  283.15   11.68
  -1  -7   2   44.25    2.19
  -1   7   2   49.86    2.30
  -1   7   2   47.82    2.35
   1   7  -2   47.69    2.31
  -1  -7   2   46.66    2.09
   1  -7   2   45.70    2.01
   1  -7  -2   48.93    2.28
  -1  -7  -2   48.65    2.28
  -1   7  -2   48.30    2.28
  -1   7  -2   46.83    2.20
  -1   7  -2   49.62    2.30
   4  -4  -6  164.07    7.17
  -4   4  -6  160.61    6.78
  -4   4   6  174.47    7.17
  -4  -4  -6  154.43    6.76
  -4   4  -6  160.78    6.65
  -4   4  -6  167.97    7.01
  -4   4   6  168.96    7.10
  -4  -4   6  162.86    6.84
  -4  -4  -6  151.63    6.34
  -4  -4  -6  166.49    6.84
  -4  -4  -6  173.23    7.21
   4   4  -6  177.47    7.53
   4   4  -6  171.93    7.42
  -4   4   6  170.92    7.17
   4   4  -6  165.80    7.15
   4  -4   6  152.90    6.91
  -4  -4   6  162.96    7.07
   4  -4   6  174.79    7.23
  -5   2   6  595.56   24.12
   5   2  -6  600.74   24.71
   5  -2   6  592.31   24.00
  -5   2   6  612.24   25.04
  -5   2  -6  501.53   20.32
   5  -2   6  574.99   23.55
   5   2  -6  584.93   24.17
  -5   2   6  599.96   24.43
   5  -2  -6  597.13   26.83
  -5  -2  -6  604.66   24.44
  -5  -2  -6  586.60   23.88
   6  -2   0  716.57   35.82
  -6   2   0  657.64   26.95
  -6  -2   0  702.69   28.45
  -6   2   0  732.13   36.43
  -6   2   0  693.72   28.07
   6  -2   0  735.31   36.63
  -1  -5   8  230.89    9.56
  -1  -5   8  251.72   10.76
   1  -5   8  221.33    9.60
  -1  -5  -8  242.40    9.96
   1   5  -8  237.84    9.93
   1  -5  -8  235.23    9.85
   1   5   8  250.02   10.33
  -1   5   8  227.82    9.40
   1  -5   8  241.92    9.93
  -1  -5  -8  241.34    9.90
   1  -5  -8  244.83   10.03
  -1  -5   8  238.15    9.82
  -1   5  -8  230.27    9.52
  -1  -5  -8  248.53   10.29
  -5   3  -5   60.26    2.60
  -5  -3  -5   53.36    2.45
  -5  -3  -5   57.95    2.50
   5   3  -5   58.71    2.79
  -5   3  -5   58.80    2.59
  -5   3   5   57.79    2.54
   5  -3   5   58.08    2.57
   5  -3   5   57.67    2.95
  -5  -3  -5   58.90    2.63
  -5  -3  -5   46.45    2.39
  -5   3   5   58.00    2.71
   5   3  -5   57.61    2.88
  -5  -3   5   58.97    2.79
   5   3  -5   54.34    2.76
  -5  -3   5   57.88    2.60
  -5   3   5   58.94    2.72
   0   7  -3   34.36    1.73
   0  -7   3   32.80    1.51
   0  -7   3   35.13    1.92
   0   7  -3   35.56    1.81
   0  -7  -3   35.55    1.74
   0   7  -3   36.01    1.79
   3   0 -10  198.99    8.44
   3   0 -10  192.74    7.99
  -3   0 -10  198.74    8.18
  -3   0  10  200.15    8.25
  -3   0  10  195.06    8.05
  -3   0 -10  191.04    8.28
   3   0 -10  198.07    8.38
   6   1  -3    9.11    0.85
   6  -1  -3    8.87    0.81
  -6   1   3    7.89    0.71
   6  -1   3    7.83    0.56
  -6   1  -3    8.09    0.55
  -6  -1  -3    8.53    0.55
  -6   1   3    8.90    0.62
  -6  -1   3    8.63    0.59
  -6  -1  -3    8.39    0.60
  -4   5   4  265.36   11.09
   4   5  -4  260.89   10.80
  -4  -5  -4  258.08   10.64
  -4   5   4  264.40   10.85
  -4   5  -4  258.66   10.65
  -4   5  -4  254.78   10.47
  -4  -5  -4  258.82   10.84
   4   5  -4  261.00   11.02
  -4   5  -4  253.94   10.42
  -4  -5  -4  264.30   10.92
   4  -5   4  252.95   10.66
  -4   5   4  261.35   10.87
  -4   5   4  269.55   10.98
  -4  -5   4  265.71   10.92
  -4  -5  -4  245.49   10.39
  -4  -5  -4  259.42   10.59
   4  -5   4  270.52   11.06
   4  -5  -4  263.96   10.86
   4  -5   4  261.09   10.64
  -4  -5   4  259.10   10.71
  -4  -5   4  261.86   11.16
   4   5  -4  257.01   10.91
  -5   4   3  173.74    7.15
  -5  -4   3  170.51    7.22
   5   4  -3  181.24    7.59
   5  -4  -3  163.20    6.81
  -5  -4  -3  173.95    7.49
  -5  -4  -3  168.75    7.10
  -5   4  -3  179.25    7.42
  -5  -4  -3  167.39    7.22
  -5   4   3  180.92    7.66
  -5   4   3  176.49    7.30
  -5  -4   3  170.84    7.11
  -5  -4  -3  180.63    7.52
   5  -4   3  181.14    7.49
  -5   4  -3  179.32    7.38
   5  -4   3  173.11    7.45
  -5   4   3  179.87    7.72
  -5  -4   3  170.95    7.45
   0  -2 -11   87.70    3.83
   0  -2  11   87.54    3.75
   0  -2  11   85.28    3.74
   0   2 -11   90.19    3.90
   0   2  11   84.36    3.70
   0   2  11   91.53    3.84
   0  -2 -11   89.73    3.87
   5   0  -7   14.59    1.11
  -5   0   7   12.48    0.80
   5   0  -7   17.05    1.21
   5   0  -7   14.30    1.16
  -5   0  -7   13.11    0.71
  -3  -1  10  166.67    6.92
  -3   1  10  171.90    7.11
   3   1  10  186.17    7.63
  -3  -1 -10  173.99    7.18
   3  -1 -10  169.94    7.42
   3  -1 -10  177.43    7.57
   3   1 -10  170.54    7.10
   3  -1 -10  174.61    7.27
  -3   1  10  165.19    6.99
  -3  -1 -10  167.74    7.27
  -3  -1  10  173.28    7.18
  -3   1 -10  172.47    7.53
   3   1 -10  171.67    7.33
   3   1 -10  178.25    7.57
  -3   1 -10  173.96    7.18
  -6   2  -2  133.78    5.55
   6  -2   2  129.09    5.81
   6   2  -2  132.33    5.63
  -6  -2  -2  124.07    5.15
  -6  -2  -2  134.70    5.66
  -6  -2   2  132.40    5.57
  -6   2  -2  126.26    5.28
  -6   2   2  129.08    5.40
   6  -2  -2  127.16    5.37
   6  -2   2  130.81    5.50
  -6   2   2  127.20    5.29
  -6   2   2  134.17    5.90
  -3   3  -9   24.73    1.42
  -3  -3   9   25.16    1.46
  -3  -3  -9   23.37    1.12
  -3   3  -9   23.04    1.16
   3  -3   9   23.06    1.40
   3   3  -9   24.33    1.38
  -3   3   9   22.54    1.12
  -3  -3   9   23.30    1.22
  -3   3   9   24.63    1.21
   3  -3  -9   23.07    1.18
   3   3  -9   22.48    1.31
   3  -3  -9   23.85    1.38
   1   7  -3  203.29    8.54
   1   7  -3  166.72    7.18
   1  -7   3  189.62    7.81
   1   7   3  197.46    8.26
  -1   7  -3  203.87    8.53
  -1  -7  -3  196.57    8.18
  -1  -7   3  197.01    8.39
  -1   7  -3  175.04    7.32
  -1   7  -3  191.40    8.00
   1  -7  -3  201.32    8.38
  -1  -7   3  192.57    7.94
  -3   4   8    1.29    0.21
   3  -4  -8    1.38    0.44
  -3   4  -8    6.92    0.64
  -3  -4  -8    0.89    0.28
   3  -4   8    2.27    0.75
  -3   4   8    1.26    0.30
   3   4  -8    0.76    0.42
   3  -4   8    1.38    0.24
  -3  -4   8    1.09    0.39
   3   4  -8    0.82    0.42
  -3  -4   8    1.47    0.64
  -3  -4  -8    1.72    0.47
  -2   4   9  212.52    8.78
   2  -4   9  199.15    8.32
   2  -4  -9  211.38    8.71
   2   4  -9  205.27    8.65
  -2   4  -9  207.62    8.73
   2  -4   9  219.60    9.40
  -2  -4   9  212.82    9.05
  -2  -4  -9  212.72   10.70
  -2   4  -9  199.16    8.22
   2   4   9  209.19    8.75
   2  -4  -9  194.03    8.21
   2   4  -9  212.34    8.89
  -2  -4   9  206.80   10.48
   4   0  -9    9.98    0.91
  -4   0   9    9.18    0.67
  -4   0   9    9.26    0.67
  -4   0  -9    8.87    0.60
   4   0  -9    8.40    0.80
   2  -7   0   97.83    5.13
  -2   7   0  101.17    5.32
  -2  -7   0   90.77    4.74
   2   7   0   95.23    5.16
  -2  -7   0   97.98    5.18
  -2   7   0   99.65    5.16
  -2   7   0   98.70    5.12
   5   1  -7   29.58    2.02
  -5   1   7   28.84    1.69
  -5   1  -7   27.74    1.53
  -5  -1  -7   27.64    1.53
   5  -1  -7   28.78    1.82
   5  -1  -7   28.63    1.92
   5   1  -7   32.73    2.05
   5   1  -7   33.91    2.16
   1  -2  11   34.94    1.92
   1  -2 -11   33.88    1.93
  -1   2  11   36.30    1.98
   1   2  11   34.76    1.94
   1   2 -11   37.66    2.12
   1   2  11   35.29    1.88
  -1   2 -11   34.64    1.93
   1  -2 -11   36.20    2.07
  -1  -2  11   37.30    2.05
  -1  -2 -11   37.24    2.04
  -1   2  11   36.78    1.97
   2   0 -11  139.57    7.21
  -2   0 -11  139.52    7.10
  -2   0  11  134.24    6.83
  -2   0 -11  136.13    7.27
  -2   0  11  136.69    6.95
   2   0 -11  138.59    7.20
   2   0  11  135.46    6.85
   2   0 -11  121.93    6.32
   3  -6   4  260.95   13.06
  -3  -6   4  282.90   14.56
   3  -6   4  282.02   14.39
  -3   6  -4  271.53   13.67
   3  -6  -4  291.72   14.69
   3   6  -4  265.32   13.62
  -3   6   4  277.27   14.08
  -3   6  -4  283.81   14.32
  -3   6   4  275.63   13.94
  -3  -6   4  271.24   13.69
  -3  -6  -4  258.14   13.03
  -3  -6  -4  271.15   13.64
   3   6  -4  267.55   13.64
  -3   6   4  247.71   12.51
  -3   6   4  289.77   14.56
  -3   6  -4  268.32   13.48
   3  -6   4  271.14   13.61
  -6   0   4    0.05    0.35
   6   0  -4   -0.79    0.52
  -6   0  -4    0.14    0.27
  -6   0  -4    0.07    0.19
   6   0   4    0.23    0.29
   2   7   1  120.72    6.53
  -2   7   1  122.57    6.30
  -2   7  -1  124.34    6.38
  -2   7  -1  129.06    6.64
   2  -7   1  122.70    6.38
  -2  -7  -1  116.95    6.11
   2  -7  -1  128.24    6.62
  -2  -7   1  124.95    6.54
  -2  -7   1  122.49    6.27
  -2   7   1  127.92    6.63
   2   7  -1  111.51    5.95
   2   3 -10   65.47    3.54
  -2   3  10   65.93    3.45
   2  -3 -10   66.10    3.47
  -2  -3  10   65.61    3.48
   2  -3  10   63.73    3.39
   2   3 -10   69.37    3.73
  -2   3 -10   67.32    3.54
  -2   3  10   66.96    3.47
   2   3  10   64.90    3.35
  -2  -3  10   65.94    3.61
  -2   3 -10   67.08    3.73
   2  -3 -10   64.67    3.52
  -2  -3 -10   68.42    3.56
   2  -3  10   66.63    3.68
  -4   1  -9   59.44    3.14
  -4   1   9   58.80    3.12
   4  -1  -9   58.49    3.35
  -4  -1   9   57.50    3.05
  -4  -1  -9   55.65    2.92
   4   1  -9   56.23    3.30
   4   1  -9   54.52    3.14
   4  -1  -9   53.59    3.12
  -4   1   9   57.93    3.05
   0   7   4  210.72   10.69
   0   7  -4  200.48   10.22
   0  -7   4  199.23   10.03
   0  -7   4  210.35   10.86
   0   7  -4  179.58    9.25
   0  -7  -4  210.42   10.66
  -2   1  11   64.41    3.36
   2  -1 -11   63.19    3.43
  -2   1  11   58.70    3.08
  -2   1 -11   64.96    3.40
  -2  -1 -11   64.76    3.39
  -2  -1  11   62.84    3.30
   2   1 -11   62.83    3.39
  -2   1 -11   59.94    3.49
  -2  -1 -11   60.92    3.44
   2   1  11   65.60    3.39
  -2  -1  11   62.54    3.27
   2   1 -11   64.76    3.52
   2  -1 -11   63.49    3.44
   2  -1 -11   63.61    3.37
  -6  -1  -4    2.72    0.33
   6  -1  -4    2.61    0.56
  -6   1   4    3.35    0.50
  -6  -1  -4    2.68    0.37
  -6   1  -4    2.57    0.32
  -6   1   4    2.79    0.38
   6   1  -4    3.38    0.73
   6  -1   4    3.55    0.44
  -6  -1   4    2.42    0.49
  -6  -2  -3  183.64    9.31
   6  -2   3  181.98    9.22
   6  -2  -3  172.48    8.75
   6  -2   3  158.22    8.20
  -6  -2   3  180.16    9.15
   6   2  -3  188.91    9.67
  -6  -2  -3  178.01    8.97
  -6   2   3  170.18    8.58
  -6   2   3  180.23    9.32
  -6   2  -3  175.08    8.85
  -6   2  -3  177.93    8.97
  -6   2   3  182.43    9.22
   0  -6  -7   36.23    1.97
   0   6  -7   38.60    2.18
   0  -6  -7   39.19    2.16
   0  -6   7   37.08    2.44
   0   6  -7   38.49    2.16
   0   6   7   39.47    2.19
   0  -6   7   36.95    2.03
   5  -4   4   66.53    3.49
  -5   4  -4   65.08    3.42
  -5  -4   4   70.46    3.73
   5  -4   4   63.41    3.63
   5   4  -4   67.09    3.61
  -5   4   4   63.58    3.33
  -5   4   4   64.19    3.49
  -5  -4   4   65.27    3.67
  -5  -4  -4   64.51    3.45
  -5  -4  -4   64.80    3.36
   5  -4  -4   67.25    3.54
  -5   4   4   67.90    3.51
  -5   4  -4   65.68    3.41
  -5   4   4   65.33    3.60
  -5  -4  -4   59.67    3.37
  -5  -4  -4   68.72    3.63
   2   6  -6   24.34    1.55
  -2  -6  -6   24.52    1.45
  -2  -6  -6   24.39    1.40
   2  -6   6   25.87    1.85
  -2  -6   6   23.02    1.78
  -2   6  -6   25.13    1.45
   2  -6   6   26.11    1.47
  -2   6  -6   25.78    1.56
   2   6   6   24.26    1.48
   2   6  -6   24.45    1.54
  -2   6   6   24.18    1.40
  -2   7  -2  255.82   12.89
  -2   7   2  234.29   12.41
   2   7  -2  251.28   12.85
  -2   7  -2  267.92   13.53
   2  -7   2  271.38   13.77
  -2  -7   2  246.31   12.40
  -2  -7   2  263.54   13.46
  -2  -7  -2  248.46   12.60
  -2   7   2  259.98   13.11
  -2  -5   8  156.57    8.02
   2  -5   8  163.06    8.59
  -2  -5  -8  164.87    8.37
  -2  -5  -8  158.58    8.03
   2  -5   8  172.02    8.70
   2   5   8  159.48    8.20
   2   5  -8  163.55    8.44
   2  -5  -8  162.70    8.43
  -2  -5   8  163.89    8.36
  -2  -5   8  166.66    8.79
  -2   5   8  159.42    8.08
  -2   5  -8  164.28    8.35
   4   3  -8  184.28    9.52
  -4  -3  -8  188.12    9.46
  -4  -3   8  189.34    9.60
  -4   3  -8  180.70    9.13
  -4   3   8  193.93    9.83
   4  -3   8  191.71    9.69
  -4  -3   8  198.46   10.18
   4  -3  -8  187.83    9.73
   4   3  -8  188.50    9.74
  -4   3   8  193.35    9.84
   4  -3   8  193.19    9.98
  -4   3   8  190.17    9.60
  -4  -3  -8  196.79    9.95
   4  -5  -5   40.04    2.20
  -4   5  -5   34.33    1.92
   4   5  -5   38.23    2.18
   4  -5   5   36.21    2.30
  -4  -5   5   36.37    2.37
  -4  -5  -5   36.22    1.94
  -4  -5  -5   35.49    1.97
  -4  -5  -5   38.61    2.16
  -4  -5   5   35.15    1.98
  -4   5   5   37.90    2.16
  -4   5   5   37.49    2.00
  -4   5  -5   38.12    2.06
   4   5  -5   34.43    2.13
  -4  -5  -5   36.25    2.18
   4  -5   5   39.77    2.14
  -4   5   5   38.80    2.11
  -4   5  -5   38.86    2.14
  -4   5   5   38.02    2.15
   4   5  -5   34.02    2.12
   0  -4 -10  825.97   41.29
   0   4 -10  856.88   29.28
   0   4 -10  882.23   29.92
   0  -4  10  889.71   30.13
   0   4  10  823.90   41.10
   0  -4  10  760.62   38.00
   0   4  10  855.07   28.78
   3   2 -10  104.60    5.51
   3  -2 -10  111.80    5.94
  -3   2 -10   97.64    5.25
   3  -2 -10  109.64    5.64
  -3   2  10   99.35    5.09
  -3  -2  10   99.73    5.26
  -3  -2 -10  101.66    5.40
   3  -2 -10  107.48    5.67
  -3   2  10  110.32    5.65
   3   2  10  104.22    5.30
  -3  -2 -10  103.09    5.27
  -3   2 -10  108.74    5.56
   1  -7  -4  306.33   15.42
  -1   7  -4  306.30   15.43
   1   7  -4  307.63   15.63
  -1   7  -4  296.84   15.08
   1   7  -4  285.02   14.49
  -1   7  -4  301.57   15.24
   1   7   4  310.80   15.67
   1  -7   4  296.43   14.84
  -1  -7   4  293.33   14.95
  -1  -7  -4  308.42   15.54
  -1  -7   4  302.85   15.18
  -3  -5   7   82.53    4.34
  -3   5  -7   86.59    4.48
   3  -5   7   85.74    4.81
  -3   5  -7   83.59    4.39
   3  -5  -7   86.20    4.47
   3  -5  -7   84.31    4.61
   3  -5   7   88.80    4.57
  -3  -5  -7   81.74    4.26
  -3   5  -7   86.61    4.56
  -3  -5   7   84.78    4.72
  -3  -5  -7   81.35    4.22
  -3  -5  -7   86.18    4.41
  -3   5   7   82.57    4.28
   3   5  -7   81.92    4.43
  -5  -3  -6  352.78   17.69
   5  -3   6  361.35   18.10
  -5   3   6  344.86   17.28
  -5   3   6  357.49   18.01
   5   3  -6  354.43   17.98
   5  -3   6  304.87   16.01
  -5  -3   6  352.23   17.79
  -5  -3  -6  346.39   17.31
   5   3  -6  319.46   16.37
  -5   3   6  348.76   17.56
   5   3  -6  353.20   17.97
  -5   3  -6  342.78   17.13
  -6  -3   0   31.93    1.83
  -6   3   0   32.13    1.77
   6  -3   0   30.53    1.79
  -6   3   0   35.36    1.90
  -1  -6  -7   70.86    3.73
   1  -6   7   68.50    3.96
  -1  -6   7   76.65    4.39
   1   6  -7   65.58    3.55
   1   6   7   71.30    3.82
  -1  -6   7   69.72    3.68
  -1   6  -7   69.07    3.67
   1  -6  -7   71.01    3.73
  -1   6   7   68.03    3.58
   1  -6   7   64.93    3.40
  -1  -6  -7   71.52    3.72
   1   6  -7   68.51    3.68
  -1   6  -7   70.60    3.73
  -4   4  -7  155.93    7.97
  -4  -4  -7  164.70    8.37
   4  -4  -7  159.39    8.36
  -4   4   7  162.07    8.26
  -4   4   7  161.00    8.22
  -4  -4   7  164.73    8.58
  -4   4   7  153.31    7.82
   4  -4   7  167.18    8.46
  -4  -4   7  168.56    8.58
  -4   4   7  163.73    8.29
  -4  -4  -7  166.79    8.48
   4   4  -7  160.88    8.39
   4  -4   7  167.47    8.83
   4   4  -7  156.88    8.18
  -4   4  -7  165.01    8.35
   4   4  -7  163.91    8.47
  -4  -4  -7  159.98    8.07
   5   2  -7   22.05    1.63
   5  -2  -7   23.33    1.50
  -5  -2  -7   19.12    1.09
  -5   2  -7   21.77    1.24
  -5   2   7   20.13    1.25
   5   2  -7   21.97    1.55
   5  -2   7   21.58    1.28
   5  -2  -7   21.41    1.56
  -4   6   0   73.37    3.83
  -4  -6   0   70.44    3.76
  -4   6   0   74.14    3.84
  -4   6   0   69.04    3.79
  -4  -6   0   75.58    4.15
   4   6   0   74.81    3.91
   4  -6   0   76.60    4.07
  -6   3  -1   70.17    3.66
  -6  -3   1   69.60    3.67
   6   3  -1   70.96    3.73
   6  -3  -1   67.97    3.61
   6  -3   1   71.63    3.75
  -6  -3  -1   67.78    3.58
  -6   3   1   67.78    3.84
  -6   3  -1   69.90    3.61
  -6   3   1   68.58    3.54
   6  -3   1   65.38    3.58
  -6   3   1   65.12    3.43
  -4  -6  -1  187.97    9.68
  -4  -6   1  188.54    9.81
  -4   6   1  169.20    8.54
   4  -6  -1  192.39    9.78
   4  -6   1  182.90    9.35
  -4   6  -1  179.43    9.08
   4   6  -1  185.69    9.41
  -4   6   1  192.11    9.72
  -4   6   1  175.03    9.02
  -4   6  -1  188.90    9.78
  -4  -6  -1  186.61    9.53
   4   6  -1  177.98    9.31
  -4   6  -1  188.94    9.54
   4   6   1  184.65    9.34
   0  -5  -9    2.76    0.39
   0  -5   9    2.71    0.41
   0   5  -9    2.20    0.39
   0   5   9    2.53    0.35
   0  -5   9    2.74    0.35
   0  -5  -9    1.88    0.30
   1  -4  10   58.41    3.08
   1   4 -10   59.92    3.23
  -1  -4  10   60.40    3.25
  -1   4  10   57.72    3.05
  -1   4 -10   57.16    3.05
   1  -4  10   47.87    2.61
   1   4  10   59.83    3.20
   1  -4  10   58.62    3.35
   1   4 -10   53.90    2.97
   1  -4 -10   58.71    3.20
  -1  -4  10   57.60    3.25
  -1  -4  10   55.15    2.96
  -1   4  10   61.51    3.18
   1  -4 -10   58.71    3.10
   2   7  -3   74.30    4.05
  -2  -7   3   72.35    3.78
  -2  -7   3   72.97    4.09
   2  -7   3   74.22    3.81
   2  -7   3   75.83    4.13
  -2   7   3   80.24    4.19
  -2   7  -3   78.59    4.14
  -2   7  -3   73.40    3.86
   2   7  -3   74.87    4.16
  -2  -7  -3   76.65    4.06
   0  -3 -11  105.47    5.48
   0   3  11  107.00    5.50
   0  -3  11  113.67    5.87
   0  -3  11   97.49    5.09
   0   3 -11  105.74    5.51
   0   3 -11  114.14    5.89
   0   3  11  109.06    5.54
  -3  -6   5   98.77    5.45
   3  -6   5   94.10    5.13
  -3  -6  -5   95.43    4.93
  -3  -6  -5   95.31    4.86
   3   6  -5   95.50    5.12
  -3   6  -5   94.48    4.89
  -3  -6  -5   97.60    5.07
   3  -6   5   97.88    5.02
   3  -6   5   93.16    4.75
  -3   6  -5   97.19    5.06
   3   6  -5   95.22    5.13
   3  -6  -5   95.84    4.96
  -3  -6   5   90.10    4.68
  -3   6   5   93.35    4.90
   4   2  -9   67.00    3.74
  -4   2  -9   66.25    3.45
  -4  -2  -9   70.56    3.64
   4  -2  -9   68.66    3.87
  -4  -2   9   70.82    3.73
  -4   2   9   67.32    3.51
   4  -2  -9   69.98    3.85
  -4   2   9   69.32    3.64
  -6   0  -5  142.31    4.98
   6   0  -5  139.57    7.41
  -6   0  -5  132.85    4.70
  -6   0   5  132.32    6.75
  -5  -5   0  110.11    4.00
  -5  -5   0  108.04    4.30
   5   5   0  109.80    3.96
   5  -5   0  103.91    3.86
  -5   5   0   96.35    3.50
  -5   5   0  109.37    3.87
  -5   5   0  108.04    4.17
  -5  -5   0  104.98    3.98
   0   0 -12  181.37    6.41
   0   0 -12  172.51    6.13
   0   0  12  172.68    6.02
   0   0  12  170.80    5.95
  -2  -2 -11  257.58    8.88
   2  -2 -11  261.65    9.21
   2  -2 -11  263.01    9.27
   2   2 -11  218.56    7.85
  -2   2  11  235.17    8.23
  -2  -2 -11  258.30    9.19
   2   2  11  269.76    9.22
  -2   2  11  264.63    9.08
  -2   2 -11  265.60    9.17
  -2  -2  11  247.00    8.58
   2  -2 -11  254.68    8.88
   2   2 -11  270.22    9.45
  -6  -2   4  117.30    4.23
  -6   2   4  118.56    4.23
   6  -2  -4  120.13    4.48
   6  -2   4  109.20    3.95
  -6   2  -4  111.83    3.95
  -6  -2  -4  115.87    4.09
   6   2  -4  115.10    4.36
  -6   2  -4  117.77    4.19
  -6   2   4  112.27    4.25
  -6  -2  -4  110.41    4.00
  -6   3   2   71.25    2.96
  -6  -3  -2   71.67    2.71
  -6  -3   2   73.78    2.78
  -6   3   2   74.00    2.73
  -6   3  -2   67.53    2.48
  -6   3  -2   70.89    2.63
   6  -3   2   73.46    2.74
   6  -3  -2   70.06    2.66
   6   3  -2   71.17    2.73
   6  -3   2   65.77    2.79
  -6   3   2   69.41    2.53
   5  -5   1   84.18    3.24
  -5   5   1   82.66    2.97
  -5   5  -1   84.44    3.04
   5   5   1   82.01    3.02
  -5   5  -1   86.10    3.47
  -5   5   1   82.71    3.27
   5  -5  -1   79.21    3.01
  -5  -5  -1   84.27    3.13
  -5  -5   1   82.95    3.11
  -5   5   1   83.62    3.06
  -5   5  -1   82.92    3.05
  -5  -5   1   79.47    3.40
  -5  -5  -1   78.02    3.09
  -5  -5   1   80.35    3.13
   5   5  -1   82.00    3.04
  -4   6  -2  135.98    4.80
  -4  -6  -2  137.20    5.01
  -4   6   2  126.78    4.49
   4   6  -2  132.30    5.10
  -4  -6   2  133.88    4.79
  -4  -6  -2  136.86    5.05
  -4   6  -2  134.49    4.79
  -4   6   2  138.47    5.10
  -4   6  -2  132.62    4.73
   4   6  -2  141.84    5.06
  -4   6   2  137.75    4.89
   4  -6  -2  137.23    4.98
  -4  -6   2  136.63    5.29
   4  -6   2  131.79    4.61
   4  -6   2  132.89    4.92
   0   7  -5    4.18    0.46
   0   7   5    3.96    0.46
   0   7  -5    4.28    0.44
   0  -7  -5    4.30    0.53
   0  -7   5    4.18    0.98
   0  -7   5    3.73    0.33
  -1  -5   9   84.05    3.49
   1  -5  -9   89.94    3.45
   1   5   9   97.39    3.61
  -1  -5   9   92.43    3.42
   1  -5   9   90.52    3.30
  -1  -5   9   95.75    3.54
   1   5  -9   89.02    3.40
   1  -5  -9   93.89    3.39
   1  -5   9   91.95    3.79
  -1   5   9   87.93    3.22
  -1  -5  -9   89.49    3.35
  -6  -1  -5  193.98    6.76
  -6  -1   5  205.90    7.18
   6  -1   5  206.84    7.21
  -6  -1  -5  210.83    7.26
   6  -1  -5  199.71    7.25
   6   1  -5  210.04    7.71
  -6   1  -5  188.74    6.55
  -6   1   5  199.85    6.96
   5   0  -8 1500.66   50.96
  -5   0  -8 1301.97   43.74
  -5   0   8 1293.84   43.64
   5   0  -8 1591.08   50.60
   5   0  -8 1297.71   44.15
   1   3 -11   26.60    1.28
   1  -3  11   26.80    1.42
   1   3  11   27.79    1.12
  -1  -3  11   23.73    1.14
  -1  -3  11   28.87    1.41
   1   3  11   25.35    1.16
  -1  -3  11   28.68    1.26
  -1   3  11   25.72    1.11
   1  -3  11   27.48    1.21
   1   3 -11   27.21    1.26
  -1   3  11   26.89    1.09
  -1  -3 -11   26.50    1.15
   1  -3  11   26.00    1.13
  -1   3 -11   26.85    1.21
   1  -3 -11   27.79    1.30
   0  -1 -12 1426.77   48.16
   0   1 -12 1499.59   50.63
   0   1  12 1527.63   47.72
   0  -1 -12 1517.26   47.80
   0   1  12 1580.79   49.47
   0   1 -12 1518.18   47.70
   0  -1  12 1518.08   48.56
  -5   4  -5  199.91    6.97
  -5  -4   5  197.06    6.92
  -5   4   5  187.38    6.53
  -5   4  -5  194.62    6.74
   5   4  -5  196.04    6.99
  -5   4   5  188.69    6.76
  -5   4   5  191.30    6.81
   5   4  -5  203.66    7.48
   5  -4  -5  193.32    6.77
   5  -4   5  196.43    7.33
  -5  -4   5  194.94    7.09
  -5  -4  -5  195.72    6.76
  -5   4   5  197.44    6.80
   5  -4   5  189.42    6.60
   5   4  -5  193.43    7.11
  -5  -4  -5  203.35    7.12
  -1   0  12   42.41    1.64
  -1   0 -12   37.58    1.55
   1   0 -12   40.26    1.70
   1   0 -12   40.98    1.77
  -1   0  12   39.34    1.57
   5  -5  -2  120.04    4.37
   5  -5   2  134.13    4.97
  -5   5   2  132.26    5.07
   5   5  -2  132.72    4.76
  -5   5   2  136.81    5.05
  -5  -5   2  138.11    5.39
  -5  -5   2  130.07    4.78
  -5   5  -2  136.29    4.83
  -5   5   2  135.46    4.80
  -5  -5   2  134.81    4.84
  -5  -5  -2  140.85    5.02
  -5   5  -2  125.15    4.46
  -5   5   2  136.13    4.76
  -5  -5  -2  128.76    4.86
   5  -1  -8   31.20    1.58
   5  -1  -8   29.48    1.70
   5   1  -8   31.64    1.71
  -5   1   8   29.36    1.30
   5   1  -8   32.79    1.82
   5  -1  -8   30.41    1.75
   5   1  -8   34.10    1.70
  -5  -1   8   30.92    1.34
  -5   1   8   31.15    1.30
  -5   1  -8   30.82    1.27
  -5  -1  -8   30.43    1.22
  -1  -7   5   58.03    2.69
   1   7  -5   57.90    2.41
  -1   7  -5   59.00    2.31
   1  -7   5   56.51    2.10
  -1   7  -5   56.87    2.32
  -1   7  -5   58.36    2.31
  -1  -7  -5   58.89    2.29
   1  -7  -5   58.60    2.29
   1   7   5   59.88    2.40
   1   7  -5   59.77    2.42
  -1   7   5   58.95    2.29
  -1   1 -12  107.00    3.88
  -1   1  12  111.37    3.94
   1   1  12  104.11    3.80
  -1  -1  12   99.85    3.62
   1  -1 -12  104.91    3.89
   1   1 -12  103.16    3.82
  -1   1  12  102.33    3.67
  -1  -1 -12  107.20    3.89
   1  -1 -12  104.07    3.89
   1   1  12  102.16    3.61
   1   1 -12  100.35    3.80
  -6  -3  -3    9.50    0.55
  -6   3   3    8.92    0.75
   6  -3   3    9.61    0.60
  -6  -3  -3    9.25    0.63
  -6   3  -3    8.66    0.54
  -6   3   3    8.98    0.51
  -6  -3   3    9.86    0.69
   6  -3  -3    9.34    0.61
   6   3  -3    9.49    0.68
   6  -3   3    9.52    0.93
  -6   3  -3    9.68    0.54
  -6   3   3    9.89    0.60
   2   7  -4   10.63    0.80
  -2   7  -4   10.36    0.63
   2  -7   4   11.56    0.59
  -2  -7   4    9.91    1.05
   2   7  -4   11.67    0.88
  -2   7  -4   11.17    0.73
  -2  -7  -4   11.95    0.77
   2  -7   4   10.69    0.94
   3   4  -9  408.82   14.27
   3  -4  -9  413.09   14.41
  -3   4   9  415.63   14.16
   3   4  -9  424.19   14.65
  -3  -4   9  418.06   14.46
   3  -4   9  425.68   14.93
  -3  -4   9  417.73   14.53
  -3   4  -9  408.10   14.08
   3  -4   9  407.71   13.89
  -3  -4  -9  418.69   14.23
  -4   5  -6  211.88    7.49
  -4   5   6  238.53    8.35
   4   5  -6  225.80    8.20
   4  -5  -6  240.67    8.35
  -4   5  -6  235.09    8.20
  -4  -5  -6  234.21    8.16
  -4  -5  -6  238.66    8.19
  -4  -5   6  232.01    8.48
  -4   5   6  204.48    7.49
   4  -5   6  237.25    8.19
  -4  -5   6  225.26    7.86
  -4   5  -6  243.63    8.41
   4  -5   6  211.23    8.35
  -3   7   0    0.04    0.22
   3  -7   0    0.39    0.36
  -3  -7   0    0.45    0.53
  -3   7   0    0.21    0.21
  -3   7   0    0.17    0.29
   3   7   0   -0.42    0.46
  -3  -7   0    0.23    0.24
  -4   6   3   87.46    3.50
  -4  -6   3   88.98    3.29
  -4   6  -3   89.45    3.29
   4  -6   3   86.57    3.13
   4   6  -3   89.66    3.63
  -4   6  -3   87.46    3.18
  -4   6   3   86.45    3.12
   4  -6  -3   93.36    3.47
  -4  -6   3   93.87    3.89
  -4   6   3   87.26    3.33
  -4   6   3   94.62    3.43
   4  -6   3   85.25    3.40
  -4  -6  -3   90.17    3.44
   4   6  -3   94.63    3.49
  -4   6  -3   86.21    3.17
  -4  -6  -3   83.26    3.23
  -3   0 -11   32.64    1.78
  -3   0  11   34.79    1.42
   3   0 -11   32.12    1.37
   3   0 -11   31.53    1.52
  -3   0  11   35.81    1.46
   3   0 -11   35.46    1.64
  -3   0 -11   36.79    1.49
   2  -6   7  132.27    5.20
  -2  -6  -7  133.30    4.76
   2   6  -7  128.62    4.91
   2  -6   7  141.39    4.99
   2   6   7  120.06    4.44
  -2   6   7  134.87    4.80
  -2  -6  -7  130.37    4.62
  -2  -6   7  133.85    5.25
  -2  -6   7  136.84    4.90
   2   6  -7  131.78    4.86
  -2   6  -7  133.34    4.76
   3   7  -1   11.66    0.94
  -3   7   1   11.91    0.69
  -3   7  -1   12.74    0.72
   3  -7  -1   14.58    0.88
  -3   7  -1   12.40    0.87
  -3  -7   1   12.42    0.98
  -3   7  -1   12.16    0.67
  -3  -7   1   12.83    0.72
  -3  -7  -1   13.06    0.94
  -3   7   1   12.21    0.67
   3  -7   1   13.09    0.87
  -3   3  10  109.46    3.92
  -3  -3  10  118.23    4.28
   3   3 -10  114.87    4.31
  -3   3 -10  118.21    4.22
  -3  -3  10  120.01    4.51
  -3   3 -10   98.44    3.79
  -3  -3 -10  117.58    4.40
  -3  -3 -10  112.83    4.01
   3  -3  10  113.87    4.31
   3   3 -10  104.37    4.00
   3  -3 -10  113.86    4.33
  -3   3  10  118.10    4.20
  -2  -4  10  169.44    6.04
  -2   4  10  172.45    6.03
   2  -4 -10  168.36    5.90
  -2  -4  10  175.97    6.42
   2  -4  10  146.39    5.44
  -2   4 -10  174.17    6.11
   2   4 -10  168.32    6.25
   2  -4 -10  170.26    6.20
   2   4 -10  175.40    6.28
   2  -4  10  178.45    6.60
   2   4  10  165.27    5.93
   2  -4  10  175.64    6.12
   0   6  -8    0.42    0.31
   0   6  -8    0.64    0.34
   0   6   8    0.81    0.29
   0  -6  -8    1.01    0.29
   0  -6   8    0.72    0.23
  -4   0 -10  111.07    3.95
  -4   0  10  104.67    3.77
   4   0 -10  101.70    3.98
   4   0 -10  110.15    4.36
  -5   5   3  111.28    4.30
  -5  -5   3  117.01    4.22
  -5   5   3  111.90    3.95
  -5  -5   3  113.67    4.54
   5  -5   3  108.46    4.19
   5   5  -3  115.17    4.19
   5  -5  -3  106.65    3.90
  -5   5   3  115.52    4.31
  -5  -5  -3  117.14    4.23
  -5   5  -3  117.22    4.19
  -5   5   3  117.68    4.20
  -5   5  -3  113.41    4.01
   5  -5   3  117.06    4.17
  -5  -5   3  117.88    4.35
   5   5  -3  105.46    4.19
  -3   1  11  135.11    4.78
   3  -1 -11  130.09    4.85
  -3   1 -11  131.97    4.66
  -3  -1 -11  124.58    4.83
  -3  -1 -11  134.11    4.73
  -3   1 -11  118.40    4.68
   3   1 -11  127.33    4.74
   3  -1 -11  130.77    4.86
   3   1 -11  127.02    4.54
  -3   1  11  130.44    4.62
  -3  -1  11  133.14    4.73
   3  -1 -11  129.66    4.64
   3   1 -11  137.15    5.07
  -6   2   5   14.94    0.90
   6  -2   5   16.60    0.85
   6  -2  -5   15.47    0.96
  -6  -2  -5   15.90    0.75
   6   2  -5   14.41    1.01
  -6   2   5   15.46    0.79
  -6  -2  -5   15.44    0.80
  -6  -2   5   15.63    0.84
   5   3  -7   14.09    1.05
   5  -3  -7   12.89    1.01
   5   3  -7   14.39    1.02
  -5  -3  -7   15.53    0.74
   5  -3   7   16.32    0.83
  -5  -3   7   12.76    0.77
   5   3  -7   16.84    1.16
   5  -3   7   15.40    1.02
  -5   3   7   15.33    0.84
   0   2  12    1.80    0.27
   0   2 -12    2.12    0.38
   0  -2  12    1.36    0.26
   0   2  12    1.52    0.26
   0   2 -12    1.21    0.42
   0  -2 -12    2.03    0.39
   0  -2  12    1.80    0.31
   0  -2 -12    2.04    0.33
   3  -6  -6   40.08    1.65
  -3  -6  -6   39.60    1.65
  -3   6   6   39.06    1.59
   3   6  -6   36.03    1.72
   3  -6   6   40.52    2.10
  -3  -6   6   41.74    2.18
   3   6  -6   41.59    1.89
  -3  -6   6   37.63    1.60
   3  -6   6   38.85    1.54
  -3   6  -6   41.46    1.66
  -3  -6  -6   39.38    1.58
  -3   6  -6   41.56    1.75
   3   7  -2   19.72    1.21
  -3   7   2   19.03    0.92
  -3   7  -2   18.60    0.93
  -3   7  -2   19.91    0.93
  -3  -7   2   19.35    1.30
   3  -7  -2   22.17    1.09
  -3  -7  -2   20.97    1.13
   3  -7   2   21.28    1.20
  -3   7   2   19.98    0.97
  -6   0  -6  479.28   16.23
   6   0  -6  466.54   21.18
   6   0  -6  504.47   17.57
  -6   0   6  489.04   16.64
   4  -1 -10  173.35    6.56
  -4   1  10  176.22    6.15
  -4   1  10  170.25    5.99
   4  -1 -10  169.13    6.25
  -4  -1 -10  182.55    6.33
  -4   1 -10  169.81    5.92
  -4  -1  10  172.20    6.04
   4   1 -10  158.96    6.21
   4   1 -10  171.04    6.41
   3  -5  -8    9.24    0.78
   3   5  -8    9.65    0.77
  -3  -5  -8    9.44    0.57
   3  -5   8    9.99    1.11
  -3  -5   8   11.03    1.04
   3   5  -8    9.05    0.76
  -3   5  -8    9.86    0.59
  -3  -5   8    9.24    0.66
   3  -5   8   10.03    0.54
  -3   5   8   10.57    0.62
  -2   5  -9   51.34    1.92
  -2  -5   9   48.77    1.86
   2  -5   9   54.68    1.96
  -2   5   9   50.86    1.87
   2   5  -9   50.06    2.03
   2   5  -9   54.81    2.15
   2  -5  -9   51.55    2.11
   2   5   9   51.46    2.02
  -2  -5   9   55.97    2.47
   2  -5   9   51.94    2.39
  -2  -5  -9   53.98    1.98
   4   3  -9   99.92    3.65
  -4   3   9  101.67    3.47
   4   3  -9  102.28    3.72
   4  -3  -9  105.45    3.87
  -4   3  -9  104.38    3.53
  -4  -3  -9  107.43    3.58
   4  -3   9  105.44    3.84
  -4   3   9  103.45    3.48
  -4  -3   9   93.98    3.24
   1   6  -8  105.81    4.01
   1   6  -8  120.86    4.18
   1  -6   8  123.43    4.12
  -1   6  -8  110.90    3.86
   1  -6   8  121.76    4.60
  -1   6  -8  123.93    4.20
  -1  -6   8  123.52    4.67
  -1  -6  -8  114.26    3.87
  -1   6   8  123.64    4.16
  -1  -6  -8  116.51    3.94
   1   6   8  120.51    4.17
   1  -6  -8  122.57    4.12
   4   4  -8    4.49    0.62
   4  -4  -8    4.47    0.64
  -4   4   8    4.22    0.39
   4  -4   8    4.42    0.38
  -4  -4   8    4.13    0.50
  -4   4   8    4.27    0.42
  -4  -4   8    4.50    0.71
  -4   4  -8    3.73    0.36
   4   4  -8    4.06    0.61
   4  -4   8    3.62    0.75
  -4  -4  -8    4.25    0.33
  -4   4   8    3.82    0.36
   5  -2  -8  354.74   11.92
  -5  -2   8  343.09   10.96
   5   2  -8  355.85   11.83
  -5   2   8  353.01   11.25
  -5   2  -8  356.54   11.31
  -5  -2  -8  348.27   11.04
  -5   2   8  354.31   11.38
   5   2  -8  358.46   12.25
  -2   3  11  220.28    7.07
   2   3  11  218.88    7.01
   2  -3  11  224.85    7.53
   2  -3 -11  210.01    7.08
  -2  -3  11  218.90    7.36
  -2   3  11  188.79    7.17
   2  -3 -11  202.88    6.64
  -2   3 -11  225.51    7.33
   2   3 -11  220.27    7.30
  -2  -3  11  196.12    6.41
   2  -3  11  192.38    6.34
  -2  -3 -11  214.48    6.94
   2   3 -11  216.11    7.26
   0   7  -6    8.30    0.61
   0   7   6    9.99    0.64
   0  -7  -6    8.86    0.58
   0  -7   6    8.23    1.15
   0   7  -6    9.07    0.64
  -6   3  -4   65.36    2.31
   6   3  -4   68.87    2.59
   6  -3   4   67.01    2.39
   6  -3   4   65.19    2.77
  -6   3   4   65.52    2.26
  -6  -3  -4   65.23    2.25
  -6   3   4   63.78    2.50
   6  -3  -4   64.62    2.32
  -6   3   4   65.02    2.31
  -6   3  -4   65.47    2.27
  -6  -3  -4   66.06    2.39
  -6  -3   4   64.41    2.35
  -6   1  -6  197.54    6.43
  -6  -1  -6  207.07    6.66
   6  -1  -6  202.23    6.90
   6   1  -6  202.36    7.05
   6  -1   6  200.06    6.53
   6   1  -6  182.55    7.91
  -6  -1   6  202.18    6.59
  -6   1   6  205.57    6.67
   1   2  12   31.86    1.19
  -1  -2  12   30.01    1.22
   1   2 -12   28.24    1.27
   1  -2 -12   28.28    1.25
  -1   2  12   29.97    1.14
  -1  -2 -12   30.07    1.23
  -1   2 -12   31.65    1.30
   1   2 -12   28.95    1.25
   1  -2  12   28.81    1.16
   1   2  12   30.20    1.27
  -1   2  12   30.45    1.22
  -2   0  12   62.44    2.21
   2   0 -12   60.74    2.32
   2   0 -12   64.62    2.44
  -2   0 -12   60.37    2.17
  -4  -6  -4   66.93    2.49
  -4  -6   4   71.89    3.06
  -4   6  -4   67.37    2.42
  -4   6   4   68.82    2.44
   4  -6   4   64.92    2.29
  -4  -6   4   65.43    2.37
  -4   6   4   66.54    2.47
   4  -6  -4   66.67    2.42
  -4   6  -4   61.35    2.22
   4   6  -4   69.74    2.82
   4   6  -4   68.07    2.80
  -4   6   4   57.68    2.11
  -4   6  -4   69.30    2.42
   4  -6   4   57.23    2.36
   0  -8   0  134.65    4.64
   0   8   0  130.08    4.61
   0   8   0  125.47    4.39
   5  -4  -6  370.78   11.84
  -5   4   6  346.39   11.22
  -5   4   6  358.59   11.42
   5  -4   6  356.68   11.40
  -5  -4  -6  358.81   11.48
   5   4  -6  368.40   12.16
  -5   4   6  332.55   10.88
   5   4  -6  346.46   11.24
   5  -4   6  357.59   11.93
  -5  -4   6  332.09   10.93
  -5   4   6  356.95   11.30
  -5  -4  -6  351.44   11.13
  -5   4  -6  354.09   11.25
   5   4  -6  336.75   11.25
   6  -4   0   20.05    1.03
   6   4   0   16.10    0.78
  -6   4   0   19.85    0.87
  -6  -4   0   21.87    1.03
  -6   4   0   19.55    0.82
   0   8   1   11.58    0.84
   0   8   1   12.58    0.78
   0  -8  -1   12.40    0.86
   0   8  -1   12.24    0.79
   0  -8   1   12.78    0.84
   0   8  -1   11.08    0.74
  -2   7  -5  226.36    7.38
  -2   7   5  187.87    6.18
  -2  -7  -5  229.04    7.50
   2  -7   5  222.36    7.58
  -2   7  -5  227.52    7.50
   2   7  -5  229.85    7.69
   2   7  -5  210.10    7.15
  -2  -7   5  237.55    8.18
  -6   4   1   56.81    1.99
   6   4  -1   60.12    2.18
  -6   4  -1   59.43    2.12
  -6   4   1   55.52    2.15
  -6   4   1   54.53    2.34
  -6  -4   1   57.46    2.15
   6  -4  -1   48.37    1.88
  -6  -4  -1   60.79    2.23
   6  -4   1   56.64    2.25
  -6   4  -1   57.52    2.01
  -3   7  -3  116.54    3.99
  -3   7   3  118.30    4.00
   3   7  -3  115.94    4.23
   3  -7   3  112.93    4.07
  -3  -7  -3  114.77    3.99
   3  -7  -3  118.43    4.06
  -3  -7   3  118.74    4.44
  -3   7  -3  107.18    3.81
  -3   7   3  101.93    3.58
   2   1 -12  824.35   37.92
  -2   1 -12  818.63   37.67
  -2  -1 -12  838.03   38.41
  -2   1  12  810.10   25.44
  -2   1  12  826.80   37.89
   2  -1 -12  824.88   37.96
   2   1 -12  777.25   24.89
   2  -1 -12  803.81   25.52
  -2  -1  12  784.31   24.66
  -1   7   6    9.29    0.60
  -1   7  -6    9.87    0.63
  -1  -7   6    8.09    0.96
   1  -7   6    9.24    1.11
  -1  -7  -6    9.26    0.60
   1  -7  -6   10.57    0.67
   1   7   6    9.48    0.62
   1   7  -6    9.49    0.69
  -1   7  -6    8.96    0.60
   1   7  -6    9.10    0.71
  -5  -5   4  314.63   10.14
  -5  -5  -4  308.11    9.90
   5  -5  -4  315.71   10.15
  -5   5  -4  287.15    9.23
  -5   5   4  302.05    9.89
   5   5  -4  316.39   10.23
  -5  -5   4  292.58    9.86
   5   5  -4  298.98   10.14
  -5   5   4  317.16   10.44
  -5   5  -4  304.72    9.72
  -5  -5  -4  315.17   10.01
  -5   5   4  293.53    9.34
  -5   5   4  312.45   10.05
   5  -5   4  319.67   10.23
   5  -5   4  277.97    9.35
   0  -4 -11    2.00    0.34
   0   4 -11    1.22    0.38
   0  -4  11    2.20    0.31
   0  -4  11    1.92    0.36
   0   4  11    1.90    0.30
   0   4 -11    1.90    0.45
   3   2 -11   -0.03    0.48
   3   2 -11    0.77    0.38
  -3  -2 -11    0.45    0.22
  -3   2  11    0.20    0.21
  -3   2 -11    0.46    0.26
  -3  -2  11    0.89    0.34
  -3   2  11    0.51    0.26
   3  -2 -11    0.38    0.40
  -3   2 -11   -0.19    0.57
  -1   8   0    0.20    0.26
   1   8   0   -0.03    0.33
  -1   8   0    0.13    0.38
   1  -8   0    0.29    0.56
  -1  -8   0    0.23    0.49
  -7   0   0    0.12    0.25
  -7   0   0   -0.29    0.30
   0   5 -10   26.20    1.17
   0   5  10   27.82    1.18
   0   5 -10   27.61    1.25
   0  -5  10   28.76    1.19
   0  -5  10   27.51    1.18
   0   8  -2   88.46    3.20
   0   8   2   74.28    3.10
   0  -8  -2   89.46    3.17
   0  -8   2   89.75    3.29
   0   8  -2   95.57    3.44
   1  -8  -1   25.16    1.23
  -1  -8   1   23.67    1.25
   1   8  -1   22.87    1.23
  -1   8  -1   24.48    1.16
   1   8   1   23.62    1.33
  -1   8   1   24.62    1.24
  -1   8   1   24.41    1.14
  -1   8  -1   24.79    1.17
   1  -8   1   22.47    1.19
  -1  -8  -1   24.04    1.22
  -6  -4   2   57.22    2.12
  -6   4   2   55.58    1.99
  -6   4  -2   56.89    2.05
   6  -4   2   52.11    2.19
   6   4  -2   56.65    2.09
   6  -4  -2   56.94    2.13
  -6   4   2   53.64    1.89
  -6   4  -2   56.82    1.99
  -6   4   2   57.33    2.40
  -6  -4  -2   52.68    1.96
  -7   0  -1    9.38    0.59
  -7   0   1    9.02    0.48
  -7   0   1    9.90    0.62
   4  -2 -10   12.79    0.90
  -4   2  10   12.37    0.65
  -4   2 -10   12.97    0.64
  -4  -2 -10   12.99    0.63
  -4  -2  10   12.64    0.71
   4   2 -10   10.50    0.78
  -4   2  10   12.50    0.65
  -4  -5   7   12.49    0.78
  -4   5   7   11.44    0.55
  -4  -5   7   12.45    1.06
   4  -5  -7   11.85    0.68
  -4   5   7   12.04    0.69
  -4  -5  -7   11.82    0.58
  -4   5  -7   13.12    0.68
  -4   5   7   10.84    0.59
   4  -5   7   12.53    0.63
   4  -5   7   11.70    1.17
   4   5  -7   11.31    0.81
   5   0  -9  258.40    8.67
  -5   0  -9  249.25    8.00
   5   0  -9  265.43    9.05
  -5   0   9  242.21    7.81
  -1   4 -11   99.50    3.42
  -1  -4  11   99.37    3.67
   1  -4  11  101.60    3.76
   1  -4 -11   95.28    3.40
  -1  -4  11   88.00    3.06
   1   4 -11   99.11    3.47
  -1  -4  11   98.55    3.44
   1   4  11   90.87    3.19
  -1   4  11   98.63    3.36
  -1  -4 -11   95.88    3.36
   1  -4  11   83.10    2.93
   1   4 -11   98.86    3.52
  -7   1   0  576.68   18.15
  -7  -1   0  550.68   17.40
  -7   1   0  569.57   17.96
  -6   2   6   61.81    2.35
   6   2  -6   62.27    2.56
   6  -2   6   64.28    2.31
  -6  -2   6   64.90    2.34
   6  -2  -6   65.95    2.55
  -6  -2  -6   63.91    2.21
  -6   2   6   62.67    2.22
   6   2  -6   61.83    2.68
   1   5  10   72.81    2.63
   1   5 -10   71.30    2.63
   1  -5  10   58.75    2.30
  -1   5 -10   72.74    2.66
   1   5 -10   72.33    2.68
  -1   5  10   73.42    2.59
   1  -5  10   77.24    3.12
   1  -5  10   74.11    2.58
  -1  -5  10   74.32    2.99
  -1  -5  10   67.27    2.43
  -1  -5  10   74.76    2.67
  -1   8  -2    8.70    0.63
  -1   8  -2    8.99    0.62
  -1   8   2    8.93    0.64
   1  -8  -2    9.16    0.76
  -1   8   2    6.13    0.61
  -1  -8  -2    8.32    0.71
  -1  -8   2    9.61    0.86
   1   8  -2    8.03    0.67
  -7   1  -1   16.54    0.75
  -7   1  -1   16.95    0.81
  -7  -1  -1   15.54    0.78
  -7  -1   1   14.50    0.78
  -7  -1  -1   13.78    0.66
  -7   1   1   14.99    0.75
  -7   1   1   16.16    0.74
  -7   0  -2  145.94    4.84
  -7   0   2  148.62    4.91
  -6  -3  -5  204.67    6.64
  -6   3   5  184.57    6.26
   6  -3   5  199.96    6.87
   6  -3  -5  201.61    6.73
  -6   3   5  197.95    6.64
   6   3  -5  214.20    7.15
   6  -3   5  203.94    6.65
  -6  -3   5  209.17    6.84
  -6   3   5  199.43    6.51
  -6   3  -5  209.60    6.75
  -2  -6   8  173.60    5.73
   2   6  -8  200.08    6.69
   2  -6   8  194.09    6.30
  -2   6   8  175.65    5.75
   2   6   8  186.27    6.24
   2   6  -8  173.61    5.92
  -2  -6   8  202.48    7.14
  -2  -6  -8  189.44    6.22
   2  -6  -8  188.87    6.21
   2  -6   8  183.32    6.57
  -2   6  -8  186.63    6.13
   5  -1  -9   10.95    0.97
   5   1  -9   13.54    1.02
  -5   1   9   12.67    0.68
  -5   1   9   12.31    0.68
  -5   1  -9   12.36    0.63
  -5  -1  -9   11.56    0.58
   5  -1  -9   10.51    0.82
  -5  -1   9   11.87    0.68
   5   1  -9   11.96    0.92
   0   3  12  309.00   10.16
   0   3 -12  291.47    9.62
   0  -3 -12  310.74   10.11
   0  -3  12  330.91   10.81
   0  -3  12  293.88    9.49
   0   3  12  320.52   10.16
   0   3 -12  313.22   10.09
   3   7  -4    3.71    0.58
   3  -7  -4    4.56    0.55
   3  -7   4    4.41    0.78
  -3  -7   4    4.68    0.92
  -3   7   4    4.74    0.43
  -3   7  -4    4.28    0.46
  -3   7  -4    4.65    0.42
   3   7  -4    4.34    0.60
  -3  -7  -4    3.92    0.53
  -4   6  -5   94.03    3.20
   4  -6   5   93.83    3.18
  -4   6  -5   90.47    3.16
  -4  -6   5   94.08    3.73
  -4   6   5   92.49    3.17
  -4  -6  -5   91.45    3.24
  -4   6   5   93.10    3.28
   4  -6  -5   97.33    3.37
   4   6  -5   92.29    3.51
  -4  -6  -5   88.94    2.98
   4   6  -5   89.28    3.46
   4  -6   5   77.75    3.16
   0  -8   3  100.37    3.71
   0   8  -3   97.49    3.49
   0  -8  -3  102.41    3.58
   6  -4  -3    9.77    0.72
  -6  -4   3    8.62    0.68
   6  -4   3    9.45    0.94
  -6   4   3   11.50    0.72
  -6  -4  -3    9.32    0.61
  -6   4   3   10.45    0.64
   6   4  -3   10.56    0.76
  -6   4  -3   10.52    0.65
  -6   4   3   10.18    0.88
  -6  -4  -3   10.87    0.78
   6  -4   3   10.27    0.70
  -6   4  -3   10.38    0.68
   2  -2 -12   44.57    2.37
  -2   2  12   40.86    2.05
   2   2  12   44.36    1.59
  -2   2  12   43.34    2.14
  -2   2 -12   45.43    2.29
   2   2 -12   41.44    1.72
   2   2 -12   42.78    2.28
  -2  -2 -12   43.94    1.64
  -2  -2  12   45.49    1.71
  -3   6  -7   25.44    1.45
   3  -6   7   26.15    1.86
  -3  -6  -7   25.53    1.40
   3   6  -7   25.83    1.59
  -3  -6   7   28.17    1.55
  -3  -6   7   25.75    1.75
   3  -6  -7   27.50    1.50
  -3   6  -7   26.04    1.40
   3   6  -7   25.53    1.54
   3  -6   7   26.60    1.39
  -3   6   7   24.72    1.33
   6   0  -7  123.96    6.80
   6   0  -7  135.79    6.73
  -6   0  -7  128.79    6.04
  -7  -1   2  114.86    5.45
  -7  -1  -2  114.59    5.38
  -7   1  -2  117.49    5.51
  -7  -1  -2  112.40    5.33
  -7   1   2  112.72    5.35
  -7   1  -2  114.80    5.43
  -7   1   2  111.58    5.24
   5  -3   8   80.71    4.05
  -5   3   8   86.49    4.21
   5   3  -8   89.39    4.54
  -5  -3  -8   84.87    4.02
  -5  -3   8   93.07    4.48
   5   3  -8   86.13    4.38
  -5   3   8   86.33    4.13
   5  -3  -8   86.84    4.44
  -5  -5   5  155.77    7.60
   5   5  -5  149.10    7.29
   5  -5  -5  152.27    7.18
   5   5  -5  154.44    7.32
  -5   5   5  145.85    6.84
   5  -5   5  154.83    7.25
  -5   5   5  155.54    7.39
  -5   5  -5  143.17    6.76
  -5  -5   5  155.17    7.32
  -5  -5  -5  151.81    7.15
  -5   5  -5  151.57    7.09
  -5   5   5  143.97    6.71
  -5  -5  -5  149.09    7.03
   5  -5   5  151.41    7.46
   0   0 -13   -0.00    0.38
   0   0 -13    0.15    0.28
   0   0  13    0.22    0.19
   3   4 -10   78.00    3.93
   3  -4 -10   82.74    4.17
  -3  -4  10   84.35    4.25
  -3  -4  10   81.36    3.97
  -3   4  10   84.48    4.05
   3  -4  10   76.67    3.93
  -3   4 -10   84.16    4.04
   3   4 -10   85.05    4.23
  -1  -3  12   43.23    2.25
   1  -3 -12   43.83    2.29
   1  -3  12   50.86    2.68
   1   3  12   44.87    2.20
  -1  -3 -12   48.34    2.48
   1   3  12   47.72    2.43
  -1  -3  12   48.59    2.61
   1   3 -12   47.19    2.43
  -1  -3  12   36.59    1.89
  -1   3  12   43.92    2.20
   1  -3  12   41.02    2.09
  -1   3 -12   44.36    2.26
   1   3 -12   40.30    2.12
   0   6  -9   97.28    4.71
   0  -6   9   93.40    4.47
   0   6   9   85.77    4.16
   0  -6  -9   95.92    4.59
   0   6  -9   82.20    4.04
   0   7  -7    0.97    0.37
   0  -7  -7    0.83    0.37
   0  -7   7    0.68    0.96
   0   7   7    0.52    0.25
   0   7  -7    0.66    0.30
   2   7  -6   25.41    1.56
  -2  -7   6   26.87    1.91
  -2  -7  -6   26.50    1.48
   2  -7   6   26.11    1.81
  -2   7   6   25.68    1.40
   2   7  -6   25.72    1.53
  -2   7  -6   25.81    1.42
  -2   7  -6   26.98    1.54
   1   8  -3    5.45    0.62
  -1  -8   3    6.36    0.86
  -1   8  -3    4.69    0.48
   1   8   3    5.55    0.57
  -1  -8  -3    5.65    0.64
   1  -8  -3    4.95    0.58
  -1   8  -3    5.14    0.58
  -6   1  -7   20.32    1.10
   6  -1  -7   18.97    1.34
   6   1  -7   22.09    1.59
   6  -1  -7   20.31    1.50
   6   1  -7   21.99    1.61
  -6  -1  -7   18.84    1.02
  -6   1   7   16.68    0.98
   7   0   3   14.21    0.88
  -7   0   3   14.41    0.89
  -7   0  -3   14.25    0.85
  -7   0  -3   13.46    0.79
  -2   8   0    9.73    0.70
  -2  -8   0    9.13    0.88
  -2   8   0    9.17    0.68
   2  -8   0    9.75    0.84
   2   8   0    9.96    0.95
  -5   4  -7   17.39    0.98
  -5  -4  -7   16.69    0.93
   5  -4   7   15.45    1.31
  -5  -4   7   16.32    1.03
  -5  -4   7   17.32    1.23
  -5   4   7   15.47    0.86
   5   4  -7   15.78    1.19
   5   4  -7   16.90    1.25
  -5   6   0    4.12    0.42
  -5   6   0    3.78    0.55
   5  -6   0    4.02    0.55
  -5   6   0    4.19    0.38
   5   6   0    4.95    0.46
  -5  -6   0    4.63    0.53
  -7   2   0    0.71    0.29
  -7  -2   0    0.89    0.38
  -7   2   0    0.30    0.28
   0   1  13   29.93    1.56
   0  -1 -13   28.44    1.58
   0   1  13   29.35    1.49
   0  -1 -13   29.27    1.59
   0  -1  13   26.72    1.42
   0   1 -13   28.56    1.60
   0   1 -13   28.55    1.56
  -2   8  -1   47.50    2.44
  -2   8   1   48.13    2.45
   2   8   1   44.82    2.56
  -2   8   1   36.67    2.09
  -2   8  -1   45.89    2.35
  -2  -8   1   46.67    2.54
   2  -8   1   48.23    2.56
  -2  -8  -1   45.42    2.40
   2  -8  -1   45.08    2.37
   2   8  -1   48.12    2.65
  -5   6  -1   18.97    1.29
  -5  -6   1   20.39    1.20
  -5   6   1   19.01    1.08
  -5   6   1   18.56    1.20
  -5  -6  -1   19.75    1.17
   5   6  -1   18.71    1.08
   5  -6  -1   19.88    1.21
   5  -6   1   19.76    1.27
  -5   6   1   19.43    1.06
  -5   6  -1   18.33    1.01
   5   6   1   19.30    1.09
  -5   6  -1   19.36    1.10
  -3   5  -9   44.15    2.22
  -3   5   9   46.69    2.33
  -3  -5   9   48.69    2.47
   3   5  -9   49.55    2.62
  -3  -5   9   49.75    2.77
   3  -5   9   48.71    2.77
  -3  -5  -9   46.68    2.34
   3   5  -9   48.41    2.59
   1   0 -13   19.61    1.17
   1   0 -13   20.98    1.22
  -1   0 -13   19.25    1.10
  -1   0  13   19.92    1.09
  -7   2   1    4.36    0.43
  -7  -2  -1    4.74    0.49
  -7   2  -1    4.37    0.42
  -7  -2  -1    4.91    0.39
  -7  -2   1    4.57    0.52
  -7   2   1    3.82    0.37
  -7   2  -1    4.10    0.42
   3   3 -11  113.96    5.54
   3  -3  11  104.20    5.14
   3  -3 -11  114.11    5.57
  -3  -3 -11  112.72    5.32
  -3   3 -11  115.57    5.48
   3   3 -11  106.81    5.25
  -3  -3  11  115.94    5.52
  -3   3  11  111.75    5.28
   1   6   9  301.91   14.04
   1   6  -9  290.00   13.53
  -1  -6   9  263.39   12.24
  -1   6  -9  295.61   13.74
   1  -6   9  297.71   13.76
   1  -6  -9  296.33   13.73
  -1  -6  -9  292.30   13.54
   1  -6   9  292.81   13.93
  -1   6   9  283.40   13.14
   1   6  -9  268.73   12.59
  -1   6  -9  293.28   13.66
  -1  -6   9  284.02   13.55
  -1   7  -7  148.90    7.07
  -1   7   7  145.64    6.87
   1   7   7  150.61    7.15
   1   7  -7  156.70    7.46
  -1  -7   7  160.51    7.90
   1  -7  -7  151.85    7.16
   1  -7   7  143.99    7.09
  -1  -7  -7  148.41    7.01
  -1   7  -7  157.91    7.46
   1   7  -7  149.49    7.18
  -7   1   3   79.68    3.83
   7  -1   3   80.06    3.87
  -7   1  -3   77.81    3.74
  -7  -1  -3   78.65    3.76
  -7  -1   3   75.82    3.68
   7  -1  -3   76.04    3.68
  -7   1  -3   68.04    3.26
  -7  -1  -3   73.62    3.56
  -4  -4   9   98.85    4.90
   4   4  -9   97.63    4.88
   4  -4   9   96.45    4.86
  -4   4   9   97.07    4.61
  -4  -4   9  101.59    4.87
   4   4  -9   96.58    4.80
  -4  -4  -9   96.77    4.57
   4  -4  -9   93.56    4.72
  -5   2   9    6.02    0.50
   5   2  -9    6.23    0.78
  -5   2   9    5.31    0.47
  -5  -2   9    6.02    0.57
   5  -2  -9    5.35    0.74
  -5  -2  -9    5.42    0.41
  -5   2  -9    5.00    0.43
  -4  -7   0  164.06    7.91
  -4   7   0  156.33    7.34
   4  -7   0  161.74    7.68
  -4   7   0  167.36    7.82
   0   8  -4    4.91    0.55
   0   8   4    5.54    0.55
   0  -8   4    4.49    0.86
   0  -8  -4    5.15    0.61
  -2   4  11   48.93    2.43
  -2   4 -11   47.56    2.38
  -2  -4  11   49.24    2.65
   2  -4  11   48.71    2.64
  -2  -4  11   44.12    2.30
  -2  -4  11   48.26    2.44
   2   4 -11   49.69    2.60
   2   4 -11   47.07    2.46
   2  -4 -11   44.53    2.37
   3   0 -12   18.44    1.18
  -3   0  12   15.93    0.93
  -3   0 -12   15.81    0.92
   3   0 -12   16.57    1.14
  -4   0 -11   21.50    1.17
   4   0 -11   22.54    1.44
   4   0 -11   21.79    1.40
  -4   0  11   22.07    1.22
  -6  -4  -4  230.82   10.67
  -6   4  -4  240.98   11.15
  -6   4   4  231.30   10.93
   6  -4   4  227.80   10.95
  -6  -4  -4  232.14   10.83
  -6  -4   4  193.12    9.03
   6  -4   4  242.41   11.26
  -6   4   4  233.10   10.82
  -6   4  -4  219.11   10.21
  -6   4   4  240.14   11.09
   6  -4  -4  228.83   10.67
   6   4  -4  242.73   11.34
  -4   7   1  113.03    5.36
  -4   7  -1  110.62    5.25
  -4   7   1  109.60    5.20
   4   7  -1  100.01    5.09
   4  -7   1  118.41    5.73
  -4   7  -1  110.30    5.25
  -4  -7   1  110.82    5.55
  -4  -7  -1  116.05    5.68
   4  -7  -1  107.65    5.20
   2  -5  10   13.57    1.22
   2   5 -10   13.97    1.00
  -2  -5 -10   14.52    0.90
  -2  -5  10   13.50    0.90
   2   5 -10   15.05    0.98
   2   5  10   12.90    0.88
  -2   5  10   14.46    0.87
  -2  -5  10   13.11    1.13
   2   8  -2   12.56    0.99
  -2  -8   2   12.83    1.09
   2  -8   2   12.80    1.01
  -2   8  -2   10.96    0.74
  -2   8  -2   12.67    0.85
  -2   8   2   12.46    0.84
  -2  -8  -2   10.75    0.89
   1   1 -13  119.67    5.76
   1  -1 -13  116.59    5.62
  -1   1  13  123.30    5.78
  -1   1 -13  116.98    5.56
   1  -1 -13  115.19    5.53
  -1  -1  13  115.42    5.46
  -1   1  13  118.71    5.60
  -1  -1 -13  114.76    5.46
   1   1 -13  115.87    5.56
   4  -3  10   96.11    4.77
   4  -3 -10   96.89    4.83
   4   3 -10   95.79    4.76
  -4   3 -10  101.33    4.82
  -4   3  10   94.56    4.52
  -4  -3  10  103.28    4.93
   4   3 -10  101.09    5.04
  -4  -3 -10  102.09    4.82
  -5  -6   2  188.48    9.16
  -5   6   2  183.94    8.85
  -5   6  -2  184.05    8.56
  -5  -6  -2  189.50    8.87
  -5  -6   2  192.58    9.01
  -5   6  -2  185.90    8.69
   5  -6   2  188.01    8.95
   5   6  -2  204.20    9.54
  -5   6   2  198.35    9.39
  -5   6  -2  186.79    8.98
  -5   6   2  187.51    8.74
   5  -6  -2  184.77    8.70
   3   7  -5  110.35    5.51
  -3  -7  -5  113.34    5.44
  -3   7  -5  102.63    4.90
  -3   7  -5  113.90    5.47
   3  -7  -5  119.50    5.70
   3   7  -5  109.57    5.41
  -3  -7   5  111.31    5.67
   3  -7   5  109.74    5.50
   7  -2  -2  369.10   17.10
  -7  -2  -2  404.49   18.69
  -7  -2  -2  407.29   18.72
  -7  -2   2  425.83   13.89
  -7   2  -2  408.24   13.28
  -7   2   2  402.63   18.58
  -7   2   2  430.52   13.98
  -7   2  -2  415.21   13.53
  -3  -1 -12   19.25    1.08
   3  -1 -12   20.93    1.31
  -3   1  12   21.34    1.16
   3   1 -12   20.56    1.29
  -3   1 -12   20.77    1.15
   3   1 -12   19.64    1.26
   3  -1 -12   18.86    1.23
  -3   1  12   19.73    1.09
  -3  -1  12   19.61    1.11
   4   1 -11   49.17    2.67
  -4   1  11   45.92    2.29
   4   1 -11   46.75    2.54
   4  -1 -11   47.78    2.62
  -4  -1 -11   47.86    2.36
  -4  -1  11   38.93    1.98
  -4   1  11   45.06    2.26
  -4   1 -11   48.10    2.38
   4  -1 -11   44.10    2.47
   6  -3   6   64.31    3.33
   6   3  -6   68.06    3.48
   6   3  -6   57.73    3.15
  -6  -3  -6   66.85    3.21
  -6   3   6   61.67    3.11
  -6   3   6   60.77    2.98
   6   3  -6   62.78    3.36
  -6  -3   6   66.36    3.26
  -6   3  -6   64.33    3.10
   1  -8  -4  197.23    9.26
  -1  -8  -4  190.06    8.92
   1   8   4  189.24    8.93
   1   8  -4  183.12    8.70
   1   8  -4  158.53    7.75
  -1   8  -4  186.76    8.81
  -1  -8   4  183.99    8.84
  -1   8  -4  190.18    8.97
  -4  -6   6    3.87    0.51
   4  -6   6    4.00    0.38
  -4  -6   6    4.49    0.92
  -4   6  -6    4.07    0.40
   4   6  -6    2.73    0.61
   4  -6  -6    3.71    0.42
   4   6  -6    4.19    0.58
   4  -6   6    3.47    0.98
  -4   7   2   38.51    2.11
   4  -7  -2   55.95    2.83
  -4   7   2   57.39    2.83
  -4  -7  -2   54.47    2.85
  -4   7  -2   52.94    2.64
  -4  -7   2   58.89    3.25
  -4   7  -2   51.03    2.52
   4   7  -2   51.23    2.83
   4  -7   2   54.97    2.88
  -7   0   4   41.55    2.11
  -7   0  -4   40.18    1.99
  -6  -2  -7   48.23    2.35
  -6   2  -7   50.82    2.48
   6   2  -7   52.78    2.90
   6   2  -7   52.10    3.05
  -6   2   7   47.70    2.36
   6  -2  -7   54.13    2.84
  -4   5  -8  211.88   11.14
  -4  -5   8  203.31    9.72
   4   5  -8  202.50    9.65
   4  -5  -8  217.63   11.46
  -4  -5   8  210.46   11.11
  -4   5   8  208.46   10.96
   4  -5   8  211.14   11.43
  -4   5   8  202.20    9.48
   4   5  -8  201.98    7.05
   0   2 -13    2.48    0.39
   0   2  13    2.06    0.23
   0   2  13    2.48    0.29
   0  -2 -13    2.50    0.44
   0   2 -13    2.83    0.43
   2  -3  12   23.98    1.22
  -2  -3  12   21.95    1.00
  -2   3 -12   19.85    0.91
   2   3  12   21.93    0.90
   2   3 -12   23.16    1.12
  -2   3  12   20.48    0.92
   2   3 -12   21.16    1.08
   2  -3 -12   19.55    1.04
  -2   8  -3  146.90    5.08
  -2   8   3  144.08    4.94
   2   8  -3  134.18    4.84
  -2   8  -3  144.94    4.98
  -2  -8   3  137.87    5.03
  -2  -8  -3  141.94    4.96
   2  -8   3  144.09    5.15
  -5  -5  -6   22.64    0.93
   5   5  -6   21.89    1.31
   5  -5   6   22.15    1.47
   5  -5  -6   20.87    0.98
   5  -5   6   21.46    0.95
  -5   5   6   22.58    1.07
  -5  -5   6   23.23    1.34
  -5   5   6   21.12    0.94
  -5   5  -6   20.75    0.91
  -5   5   6   17.92    0.86
  -7   1   4  165.14    5.54
  -7  -1  -4  162.89    5.41
   7  -1   4  167.02    5.62
  -7  -1   4  165.57    5.58
   5   6  -3  116.57    4.43
  -5   6   3  106.54    3.85
  -5  -6  -3  105.91    3.71
  -5  -6   3  114.56    4.03
  -5  -6   3  116.62    4.49
  -5   6   3  118.87    4.09
  -5   6  -3  114.28    3.94
   5  -6   3   98.46    3.69
   5   6  -3  120.23    4.17
   5  -6  -3  106.52    4.01
  -5   6  -3  113.80    3.88
  -5   6   3  111.95    3.81
  -6   5   0   42.65    1.57
  -6  -5   0   45.34    1.78
   6  -5   0   42.26    1.77
  -6   5   0   43.08    1.65
  -7  -2   3   16.99    0.87
   7  -2  -3   17.23    0.84
  -7   2   3   16.05    0.72
  -7  -2  -3   17.11    0.78
  -7   2  -3   18.51    0.82
  -7   2   3   17.70    0.85
  -7  -2  -3   18.51    0.88
  -7   2  -3   17.58    0.81
  -6   5  -1   17.77    0.78
   6  -5  -1   18.39    0.97
  -6   5   1   16.21    0.80
  -6   5   1   17.90    0.78
   6  -5   1   16.48    1.01
  -6  -5   1   16.29    0.88
  -6  -5  -1   18.78    0.95
  -6   5  -1   17.03    0.82
  -1   2 -13    0.29    0.27
   1  -2 -13    0.63    0.36
   1   2 -13    0.55    0.40
   1   2  13    0.36    0.20
  -1   2 -13    0.97    0.37
  -1  -2 -13    0.70    0.34
   1   2 -13   -0.00    0.29
  -1  -2  13    0.03    0.24
  -1   2  13    0.55    0.22
  -1   2  13    0.33    0.15
   2   0 -13   14.39    0.88
   2   0 -13   13.17    0.82
  -2   0  13   15.41    0.74
  -2   0 -13   14.69    0.75
   3  -6   8    7.22    0.55
  -3   6   8   13.58    0.69
  -3  -6   8   12.31    1.03
   3  -6  -8   14.14    0.77
   3   6  -8   14.53    0.93
  -3  -6   8   14.60    0.80
   3   6  -8   13.53    0.90
   3  -6   8   14.37    1.26
  -3   6  -8   13.80    0.73
  -3  -6  -8   14.02    0.77
   4  -7  -3  196.15    6.64
  -4   7  -3  190.78    6.36
   4   7  -3  188.80    6.71
  -4   7   3  190.63    6.37
  -4  -7   3  195.30    7.03
   4  -7   3  178.33    6.25
  -4  -7  -3  186.14    6.39
  -4   7  -3  180.69    6.08
  -4  -7   3  180.13    6.11
  -5   0  10    1.67    0.36
  -5   0 -10    2.01    0.32
   5   0 -10    1.66    0.61
   5   0 -10    1.37    0.58
   0   5 -11   33.82    1.46
   0   5  11   34.11    1.40
   0   5 -11   36.63    1.53
   0  -5  11   29.65    1.40
   0  -8   5    0.72    0.88
   0   8   5    0.18    0.33
   0   8  -5    0.17    0.28
   0  -8  -5    0.82    0.43
   0   8  -5    0.22    0.35
   6   0  -8    3.21    0.73
  -6   0  -8    2.13    0.43
  -2  -6   9  124.53    4.71
   2   6  -9  123.38    4.43
  -2  -6   9  122.64    4.64
   2   6   9  123.45    4.36
  -2  -6  -9  130.26    4.46
  -2   6  -9  126.28    4.35
   2   6  -9  120.82    4.36
   2  -6   9  128.27    4.86
  -2   6   9  125.50    4.30
   2  -6  -9  131.36    4.49
  -2   7  -7    3.96    0.42
  -2  -7   7    3.15    1.01
  -2   7   7    3.68    0.37
   2  -7   7    3.64    0.81
  -2  -7  -7    4.11    0.48
   2   7  -7    3.25    0.48
   2  -7  -7    3.38    0.47
   2   7   7    3.18    0.45
   2   7  -7    3.54    0.51
   6  -4  -5   27.97    1.20
   6  -4   5   29.79    1.66
  -6   4   5   22.67    1.15
  -6   4   5   28.79    1.13
  -6   4  -5   28.58    1.16
  -6   4   5   27.64    1.13
   6   4  -5   30.22    1.37
   6  -4   5   30.47    1.26
   6   4  -5   24.56    1.46
  -6  -4   5   28.98    1.27
  -6  -4  -5   28.79    1.14
   0  -4 -12    4.27    0.47
   0   4 -12    4.11    0.40
   0  -4  12    4.53    0.72
   0   4 -12    4.46    0.49
   0   4  12    4.23    0.39
   0  -4  12    3.64    0.39
  -3   2  12    5.53    0.42
  -3  -2  12    6.41    0.50
  -3   2 -12    6.00    0.46
   3   2 -12    6.35    0.61
  -3  -2 -12    6.55    0.45
   3  -2 -12    5.60    0.62
   3   2 -12    5.65    0.54
  -4  -2 -11   32.14    1.26
  -4   2  11   31.97    1.28
  -4   2 -11   30.31    1.24
   4   2 -11   33.61    1.60
  -4  -2  11   29.46    1.23
   4  -2 -11   31.20    1.52
  -4   2  11   29.63    1.19
   4   2 -11   26.72    1.40
  -7   3   0  146.08    4.88
  -7  -3   0  149.00    5.07
  -7   3   0  149.56    5.04
  -6  -5   2   99.28    3.50
   6  -5   2   89.61    3.43
  -6   5   2   93.63    3.20
  -6   5   2   98.52    3.42
  -6   5  -2   95.64    3.34
   6  -5  -2   93.30    3.42
  -6  -5  -2   95.09    3.35
  -6   5  -2   98.33    3.37
  -6   5   2   97.37    3.72
   0   7  -8    6.65    0.55
   0  -7  -8    6.77    0.51
   0  -7   8    5.75    1.16
   0   7   8    5.94    0.52
   0   7  -8    7.23    0.58
  -7   3  -1   53.73    1.97
  -7  -3   1   53.49    2.03
  -7   3   1   53.90    1.99
  -7   3   1   56.12    2.00
  -7   3  -1   58.22    2.08
  -7  -3  -1   59.25    2.22
  -2   1  13   54.73    2.00
  -2  -1  13   57.01    2.08
   2   1 -13   52.82    2.09
   2  -1 -13   51.78    2.07
  -2   1 -13   54.35    2.01
   2  -1 -13   52.76    2.12
  -2  -1 -13   55.88    2.07
   2   1 -13   51.88    2.09
   5  -1 -10   74.39    3.20
  -5  -1 -10   74.00    2.59
   5  -1 -10   74.84    3.35
  -5   1 -10   73.79    2.59
  -5  -1  10   72.88    2.61
  -5   1  10   75.19    2.66
   5   1 -10   71.72    3.01
   5   1 -10   68.37    2.82
   6   1  -8   51.28    2.52
  -6   1  -8   55.56    1.99
   6  -1  -8   50.12    2.60
   6   1  -8   58.85    2.59
  -6  -1  -8   53.89    1.94
  -6  -1   8   45.38    1.75
   5   3  -9  142.18    5.19
  -5  -3   9  144.54    4.92
  -5   3   9  136.72    4.63
   5   3  -9  140.58    5.11
   5  -3  -9  136.75    5.04
   5  -3   9  144.21    5.11
  -5  -3  -9  140.18    4.69
  -5   3  -9  134.37    4.54
  -5   4   8  157.18    5.30
  -5  -4   8  149.10    5.62
  -5  -4  -8  155.94    5.18
  -5   4  -8  154.23    5.18
  -5  -4   8  161.31    5.49
   5  -4   8  156.82    5.67
   5   4  -8  151.28    5.46
   5   4  -8  153.67    5.51
   5  -4  -8  145.56    5.33
   1  -5  11   20.23    1.31
  -1   5 -11   19.31    0.98
   1   5  11   20.82    1.01
  -1  -5  11   21.78    1.01
  -1   5  11   20.17    0.93
  -1  -5  11   19.50    0.94
  -1   5 -11   20.59    0.98
   1   5 -11   18.83    1.00
   1   5 -11   21.26    1.05
  -1  -5  11   22.85    1.34
   1  -5  11   16.12    0.81
   1   8   5  178.24    6.11
  -1   8  -5  178.20    6.06
   1   8  -5  167.06    5.84
  -1   8   5  185.89    6.28
   1  -8  -5  181.31    6.13
  -1  -8  -5  172.21    5.83
   1   8  -5  151.15    5.41
  -1  -8   5  179.48    6.45
  -3   7   6   79.87    2.84
   3   7  -6   77.59    3.04
  -3   7  -6   83.35    2.97
  -3  -7   6   82.54    3.43
   3  -7   6   79.76    3.29
  -3  -7  -6   80.64    2.92
  -3   7  -6   84.93    3.11
   3  -7  -6   83.77    3.01
   3   7  -6   74.75    3.00
  -3  -7   6   83.47    3.00
  -7   0   5   39.08    1.52
  -7   0  -5   40.07    1.50
   1   4 -12   79.32    2.95
  -1   4  12   78.79    2.80
  -1   4 -12   83.45    3.00
  -1  -4  12   79.94    3.09
  -1  -4  12   77.62    2.79
   1   4 -12   83.55    3.06
   1   4  12   86.39    3.14
   1  -4  12   79.89    3.06
   1  -4 -12   77.45    2.91
  -1   4 -12   80.78    2.96
  -1  -4 -12   80.73    2.96
  -2  -8   4   11.58    1.23
  -2   8  -4   11.18    0.73
  -2  -8  -4   10.36    0.68
   2   8  -4   10.48    0.82
  -2   8  -4   11.47    0.68
   2  -8   4   12.32    1.08
  -5   6  -4   14.48    0.71
  -5   6  -4   15.20    0.78
  -5  -6  -4   14.76    0.68
  -5  -6   4   16.07    1.27
   5   6  -4   15.70    1.13
  -5  -6  -4   16.07    0.85
  -5   6   4   15.64    0.79
   5  -6  -4   16.04    0.85
  -5  -6   4   14.37    0.78
   5  -6   4   14.55    1.10
  -3  -8   0    1.50    0.60
  -3   8   0    0.98    0.33
   3  -8   0    2.16    0.45
   3   8   0    1.84    0.63
  -3   8   0    1.53    0.29
  -7   2   4   24.52    1.06
   7  -2  -4   22.30    0.99
  -7  -2   4   23.65    1.07
  -7   2   4   21.86    0.91
  -7   2  -4   24.12    0.99
   7  -2   4   25.76    1.13
  -7  -2  -4   26.08    1.04
  -7   3   2   43.80    1.67
  -7   3  -2   44.73    1.69
  -7  -3  -2   42.81    1.59
  -7  -3   2   41.75    1.66
  -7   3  -2   41.58    1.54
  -7   3   2   41.58    1.54
  -7  -3  -2   42.07    1.65
   1   7   8  205.34    7.04
  -1  -7   8  205.95    7.40
   1   7  -8  193.61    6.61
   1  -7  -8  201.94    6.76
  -1  -7  -8  201.75    6.80
   1   7  -8  193.63    6.69
   1  -7   8  198.31    7.12
  -1   7  -8  198.56    6.71
  -1   7   8  202.13    6.77
  -1   7  -8  191.49    6.53
   3  -8   1   27.94    1.34
  -3  -8   1   31.10    1.60
  -3   8  -1   28.95    1.22
   3  -8  -1   28.92    1.34
  -3   8   1   29.01    1.25
  -3   8  -1   30.04    1.29
   3   8  -1   28.34    1.53
  -3  -8  -1   29.22    1.44
   0   6  10  134.86    4.64
   0  -6  10  110.10    3.82
   0  -6 -10  140.12    4.77
   0   6 -10  130.31    4.56
   0  -6  10  129.70    4.42
   0   6 -10  126.99    4.46
  -7  -1   5    1.35    0.32
  -7  -1  -5    0.92    0.28
  -7   1   5    1.29    0.39
  -6  -5   3   83.77    3.02
   6  -5  -3   77.02    2.80
  -6   5   3   78.08    2.70
  -6   5  -3   77.03    2.75
  -6   5  -3   78.29    2.78
  -6  -5  -3   82.84    2.97
  -6   5   3   81.76    2.89
   6  -5   3   73.82    3.06
   4   7  -4   44.14    2.02
  -4   7   4   45.89    1.77
  -4  -7   4   44.99    1.78
  -4   7  -4   47.20    1.78
  -4  -7   4   47.63    2.31
  -4  -7  -4   45.58    1.87
   4  -7  -4   48.49    1.91
   4  -7   4   42.16    2.01
  -4   7  -4   45.22    1.78
  -6  -3  -7   28.07    1.11
   6   3  -7   26.75    1.54
  -6   3   7   27.87    1.16
   6   3  -7   27.13    1.47
  -6   3   7   23.40    1.12
  -6   3  -7   28.42    1.14
   3  -4 -11    1.56    0.48
  -3   4 -11    1.09    0.33
  -3  -4  11    1.46    0.58
   3   4 -11    1.16    0.43
  -3   4  11    1.36    0.30
   3   4 -11    1.60    0.47
  -3  -4  11    0.79    0.39
   3  -4  11    1.12    0.54
   4   6  -7   65.91    2.71
  -4   6  -7   68.92    2.48
  -4  -6   7   65.66    2.83
  -4   6   7   70.23    2.52
  -4  -6   7   70.26    2.59
   4   6  -7   65.13    2.62
   4  -6   7   65.71    2.88
   4  -6  -7   67.64    2.47
   0  -3 -13   88.03    3.20
   0   3 -13   96.29    3.42
   0   3  13   89.68    3.16
   0   3 -13   88.75    3.24
   3  -5  10   26.76    1.52
   3   5 -10   31.27    1.46
  -3  -5 -10   32.58    1.34
  -3   5 -10   31.07    1.29
   3   5 -10   31.58    1.47
  -3  -5  10   29.85    1.54
  -3   5  10   25.53    1.09
  -3  -5  10   34.27    1.43
   3  -8   2   32.90    1.55
  -3  -8   2   31.52    1.66
   3   8  -2   33.08    1.68
  -3   8   2   31.64    1.33
  -3   8  -2   31.36    1.35
   3  -8  -2   32.68    1.45
  -3  -8  -2   30.17    1.44
  -3   8  -2   27.79    1.23
  -1   6  10   50.98    1.94
   1   6 -10   49.10    1.99
   1  -6  10   49.61    2.33
  -1   6 -10   51.97    2.01
  -1  -6  10   50.16    2.39
   1   6  10   52.00    2.03
  -1  -6 -10   52.07    1.97
   1  -6 -10   54.22    2.03
  -1  -6  10   43.82    1.72
  -1   6 -10   48.31    1.92
  -2  -2 -13   62.25    2.27
  -2   2  13   58.74    2.13
   2   2 -13   62.39    2.40
  -2   2 -13   63.46    2.31
  -2  -2  13   46.83    1.78
   2   2 -13   57.70    2.29
   2  -2 -13   60.42    2.38
   4   4 -10   32.48    1.56
  -4  -4  10   31.24    1.54
   4  -4  10   33.97    1.65
   4  -4 -10   31.74    1.57
  -4  -4  10   31.37    1.34
  -4   4  10   33.06    1.32
   4   4 -10   30.54    1.51
  -5  -2 -10   32.97    1.85
  -5   2  10   31.63    1.28
  -5  -2  10   32.89    1.90
   5   2 -10   35.83    2.29
  -5   2 -10   32.70    1.85
   5  -2 -10   28.66    1.89
  -6  -2  -8    2.69    0.33
  -6   2  -8    2.85    0.33
   6   2  -8    2.84    0.72
  -6  -2   8    3.15    0.41
   6  -2  -8    2.65    0.68
  -7   3   3   16.48    1.01
  -7  -3  -3   16.33    1.00
  -7  -3  -3   15.92    1.06
  -7  -3   3   16.38    1.09
  -7   3   3   14.76    0.95
  -7   3  -3   15.94    1.00
  -7   3  -3   16.43    1.01
   7  -3  -3   15.24    1.00
  -5   5  -7   13.85    0.88
   5   5  -7   15.06    1.19
  -5  -5   7   15.23    1.05
   5  -5   7   14.76    1.32
   5  -5  -7   14.99    0.99
  -5  -5  -7   15.84    0.96
  -5  -5   7   14.08    1.13
   5   5  -7   13.83    1.22
   0  -8   6   60.71    3.65
   0  -8  -6   63.80    3.51
   0   8   6   63.53    3.53
   0   8  -6   56.95    3.24
   0   8  -6   64.46    3.60
   6  -4  -6   16.36    1.05
  -6   4  -6   17.55    1.07
  -6  -4   6   17.05    1.14
   6   4  -6   16.50    1.38
   6   4  -6   16.38    1.32
  -6   4   6   17.25    1.08
  -6  -4  -6   17.08    1.03
  -6   4   6   16.55    1.00
  -1   3  13    4.86    0.45
  -1   3 -13    4.53    0.55
   1   3 -13    4.58    0.57
   1   3 -13    4.94    0.56
  -1   3 -13    4.26    0.45
   1  -3 -13    5.67    0.60
  -1  -3 -13    5.06    0.52
  -1  -3  13    4.77    0.47
  -4   5  -9    1.49    0.33
  -4   5   9    1.51    0.33
   4  -5   9    1.19    0.71
  -4  -5   9    1.48    0.46
  -4  -5   9    1.40    0.54
   4   5  -9    1.61    0.55
   4   5  -9    1.00    0.49
  -2  -5  11  115.64    6.19
   2   5 -11  103.17    5.65
   2  -5  11  101.39    5.65
  -2   5  11  101.25    5.42
   2   5 -11  109.88    5.97
  -2  -5  11  102.17    5.67
  -2   8   5   41.95    2.38
  -2  -8  -5   48.62    2.76
   2   8  -5   48.08    2.84
   2  -8   5   46.66    2.86
  -2  -8   5   47.64    2.97
  -2   8  -5   46.66    2.63
  -2   8  -5   46.94    2.70
   3   3 -12   43.31    2.58
  -3   3  12   43.66    2.43
  -3  -3  12   48.92    2.73
  -3   3 -12   44.72    2.49
   3   3 -12   44.56    2.61
   3  -3 -12   41.40    2.47
   4   3 -11   34.91    2.18
  -4   3 -11   32.58    1.87
  -4   3  11   32.08    1.83
  -4  -3  11   32.33    1.89
   4   3 -11   31.82    2.00
  -4  -3 -11   33.84    1.90
   4  -3 -11   26.85    1.75
   0   0 -14  139.37    7.45
   0   0 -14  147.52    7.85
  -5   6  -5   21.38    1.28
  -5  -6   5   20.22    1.61
   5  -6   5   19.89    1.58
   5   6  -5   21.71    1.58
  -5  -6  -5   19.91    1.26
   5  -6  -5   20.41    1.28
  -5   6   5   20.44    1.24
  -5  -6  -5   21.97    1.28
  -5  -6   5   17.29    1.13
  -6   5   4   13.60    0.88
   6  -5  -4   14.03    0.96
  -6  -5  -4   14.34    0.98
  -6   5   4   13.13    0.82
  -6   5  -4   13.60    0.87
  -6  -5  -4   12.90    0.82
   6  -5   4   12.77    1.21
  -6  -5   4   13.76    1.01
   3  -8   3   37.91    2.36
   3  -8  -3   39.50    2.31
  -3   8   3   38.15    2.18
  -3   8  -3   37.30    2.14
  -3   8  -3   37.70    2.18
  -3  -8  -3   39.97    2.37
   3   8  -3   38.82    2.41
  -3  -8   3   35.70    2.34
  -7  -2   5    1.19    0.41
  -7  -2  -5    0.80    0.27
  -7   2   5    0.34    0.32
   7  -2  -5    1.42    0.32
  -7   2  -5    0.52    0.22
  -2   4 -12   12.57    0.85
   2   4 -12   13.40    1.01
  -2   4  12   14.08    0.92
   2  -4  12   13.18    1.09
   2  -4 -12   13.22    1.00
  -2  -4  12   13.72    1.09
   2   4 -12   13.66    1.01
  -2  -4  12   15.09    1.02
   4   0 -12    7.08    0.77
  -4   0 -12    6.68    0.54
   4   0 -12    7.02    0.78
  -4   0  12    6.55    0.54
   1   8   6   48.13    2.77
  -1   8  -6   62.70    3.48
  -1  -8  -6   61.79    3.43
  -1  -8   6   63.92    3.86
   1   8  -6   57.33    3.35
   1  -8   6   56.94    3.47
   1  -8  -6   59.19    3.28
   1   8  -6   58.45    3.36
  -1   8  -6   45.82    2.68
  -1   8   6   63.17    3.52
  -7   0  -6   45.96    2.52
  -7   0   6   45.52    2.55
   2   7  -8   69.07    3.91
   2  -7  -8   70.07    3.83
  -2  -7  -8   62.50    3.45
  -2   7  -8   63.13    3.48
   2   7  -8   67.41    3.79
   2   7   8   64.18    3.60
  -2  -7   8   60.28    3.34
  -2  -7   8   68.52    4.05
   2  -7   8   69.22    4.14
  -2   7   8   70.45    3.84
   4   7  -5   21.12    1.52
   4  -7   5   19.59    1.52
  -4   7  -5   19.97    1.23
   4   7  -5   19.77    1.45
   4  -7  -5   20.97    1.34
  -4  -7   5   19.32    1.62
  -4   7   5   20.22    1.23
  -4   7  -5   21.62    1.36
   0   1 -14    0.87    0.42
   0   1 -14    0.83    0.30
   0  -1 -14    0.80    0.36
  -3   0 -13   66.08    3.59
  -3   0  13   65.50    3.56
   3   0 -13   65.35    3.69
   3   0 -13   60.76    3.47
  -4  -1 -12   78.80    4.23
  -4   1 -12   83.69    4.49
  -4  -1  12   79.91    4.31
   4   1 -12   80.08    4.52
   4  -1 -12   77.47    4.37
  -4   1  12   78.51    4.23
   4   1 -12   71.91    4.05
  -3   6   9   53.17    2.93
  -3   6  -9   56.22    3.11
  -3  -6   9   55.49    3.36
   3  -6   9   56.64    3.47
  -3  -6   9   52.08    2.94
   3  -6  -9   55.00    3.04
   3   6  -9   57.12    3.30
  -3  -6  -9   54.56    3.03
   3  -7  -7   28.68    1.71
  -3  -7  -7   27.18    1.64
  -3   7  -7   25.74    1.54
   3   7  -7   26.08    1.70
  -3   7   7   28.33    1.66
  -3  -7   7   26.61    1.97
  -3  -7   7   29.06    1.74
   3  -7   7   27.26    2.01
   3   7  -7   26.73    1.76
  -1   0 -14   10.20    0.76
  -1   0 -14    9.61    0.77
   1   0 -14    9.77    0.82
   1   0 -14   10.23    0.79
   0  -9   0    0.18    0.62
   0   9   0    0.11    0.29
  -7  -3  -4   82.89    4.42
  -7   3  -4   79.13    4.24
   7  -3  -4   81.55    4.42
  -7   3   4   77.16    4.16
  -7  -3   4   82.05    4.45
  -7   3   4   82.42    4.40
   6   0  -9   10.43    0.95
  -6   0  -9    8.56    0.62
   6   0  -9    9.26    0.98
  -6   0   9    9.37    0.70
  -7   1  -6   89.46    4.77
  -7  -1  -6   88.59    4.72
  -7  -1   6   83.96    4.53
  -7   1   6   90.37    4.86
   0   9  -1  132.26    7.12
   0   9   1  133.45    7.18
   0  -9   1  129.45    7.02
   0   9  -1  129.23    7.09
   0  -9  -1  136.18    7.32
  -7   4   0   47.16    2.58
  -7   4   0   41.06    2.44
  -7  -4   0   47.70    2.69
   3   1 -13    7.25    0.77
   3  -1 -13    7.09    0.72
  -3   1 -13    7.90    0.62
  -3   1  13    8.29    0.62
  -3  -1 -13    8.54    0.64
   3   1 -13    8.44    0.78
  -3  -1  13    9.48    0.69
   0  -7  -9   26.68    1.60
   0   7  -9   27.40    1.68
   0   7   9   27.63    1.68
   0   7  -9   25.77    1.61
   1   1 -14   56.25    3.21
  -1  -1 -14   63.50    3.49
  -1   1 -14   63.00    3.46
  -1   1 -14   56.17    3.18
   1   1 -14   59.54    3.33
  -1  -1 -14   58.10    3.25
   1  -1 -14   54.73    3.10
  -2  -6  10   55.08    3.31
  -2  -6 -10   55.33    3.06
   2  -6  10   48.99    3.02
   2  -6 -10   54.86    3.03
   2   6 -10   50.25    2.91
   2   6  10   42.38    2.50
  -2  -6  10   47.80    2.70
  -2   6 -10   53.93    3.00
  -2   6  10   47.68    2.66
  -7   4  -1   55.15    3.03
  -7   4   1   54.42    2.95
  -7  -4   1   55.55    3.09
  -7  -4  -1   56.51    3.14
  -7   4   1   52.68    2.90
  -7   4  -1   55.05    2.99
  -6   1  -9   34.67    1.95
   6  -1  -9   29.29    2.01
  -6  -1  -9   31.41    1.76
  -6   1   9   32.68    1.88
  -6  -1   9   36.99    2.12
   6   1  -9   40.94    2.59
   6   1  -9   41.29    2.58
  -1   9   0    5.83    0.61
   1  -9   0    4.68    0.70
   1   9   0    6.70    0.74
  -1  -9   0    6.51    0.81
   5  -4   9   19.93    1.41
  -5  -4  -9   21.93    1.27
   5  -4  -9   21.15    1.56
  -5   4  -9   19.09    1.16
  -5   4   9   21.52    1.31
   5   4  -9   21.11    1.51
  -5  -4   9   21.80    1.37
   5   4  -9   20.43    1.49
  -5  -4   9   22.53    1.50
  -5   7   0    8.02    0.64
   5  -7   0    6.80    0.71
  -5   7   0    7.84    0.58
  -5  -7   0    7.33    0.70
  -3  -8   4   42.65    2.79
  -3  -8  -4   42.84    2.49
   3   8  -4   44.94    2.77
  -3   8   4   44.71    2.53
  -3   8  -4   44.52    2.55
   3  -8   4   40.81    2.51
  -3   8  -4   43.40    2.45
   3  -8  -4   45.50    2.61
   0   9  -2    3.94    0.55
   0  -9  -2    4.71    0.64
   0  -9   2    3.61    0.73
   5   0 -11    4.27    0.70
  -5   0 -11    4.58    0.44
   5   0 -11    4.54    0.71
  -5   0  11    4.31    0.47
  -1  -9  -1   21.42    1.47
   1  -9   1   19.34    1.38
  -1  -9   1   22.04    1.51
  -1   9  -1   22.29    1.44
   1  -9  -1   20.08    1.40
  -1   9   1   20.65    1.34
   1   9  -1   22.01    1.52
  -5   7   1   50.20    2.78
   5  -7  -1   52.97    3.01
  -5   7  -1   51.38    2.85
   5  -7   1   51.40    2.98
  -5  -7  -1   43.50    2.46
  -5   7  -1   45.99    2.57
  -5  -7   1   50.46    2.82
   2   3 -13   22.47    1.44
  -2   3  13   22.88    1.36
  -2  -3  13   18.33    1.15
   2   3 -13   22.50    1.48
  -2   3 -13   22.67    1.38
   2  -3 -13   21.10    1.41
   5   3 -10  109.92    6.09
  -5   3  10  107.73    5.74
  -5  -3  10  111.84    5.98
  -5  -3 -10  113.05    5.99
   5   3 -10  109.58    6.10
   5  -3 -10  107.25    5.98
  -5   3 -10  106.85    5.69
   6   3  -8  147.94    8.17
  -6  -3   8  176.70   11.01
   6   3  -8  175.96   11.19
  -6  -3  -8  174.36   10.81
  -7   4   2   16.74    1.04
  -7  -4   2   18.38    1.22
  -7   4  -2   18.25    1.13
  -7   4   2   18.34    1.09
  -7  -4  -2   17.98    1.17
  -7   4  -2   17.35    1.07
  -1   7  -9    8.26    0.67
   1   7   9    8.69    0.72
  -1   7   9    8.30    0.66
   1  -7   9    7.75    1.00
  -1   7  -9    8.59    0.70
  -1  -7   9   10.44    1.28
   1   7  -9   10.08    0.84
  -1  -7  -9    7.92    0.64
   1  -7  -9    9.36    0.73
   1   7  -9    8.10    0.75
  -6  -5   5    6.32    0.58
  -6   5   5    6.92    0.55
  -6  -5  -5    6.51    0.50
  -6   5  -5    6.49    0.52
  -6   5   5    4.73    0.41
   6  -5   5    5.49    0.84
   6  -5  -5    6.98    0.61
   4   6  -8   15.36    1.22
   4  -6  -8   14.58    0.98
  -4   6  -8   17.30    1.09
  -4  -6   8   15.39    1.34
   4  -6   8   14.15    1.36
  -4   6   8   15.92    1.02
  -4  -6   8   14.58    1.02
   0  -5  12   27.95    1.67
   0   5 -12   30.77    1.84
   0  -5  12   31.40    2.05
   0   5  12   31.25    1.83
   0   5 -12   28.97    1.82
   0   2 -14   74.65    4.09
   0   2 -14   85.04    4.64
   0  -2 -14   88.97    4.86
  -5   1 -11   38.51    2.15
  -5  -1 -11   34.99    1.97
  -5   1  11   40.47    2.27
   5   1 -11   38.37    2.44
  -5  -1  11   39.89    2.26
   5   1 -11   37.65    2.43
   5  -1 -11   40.88    2.62
   0  -8  -7  109.87    5.91
   0   8  -7  107.81    5.83
   0   8   7  111.95    6.03
   0   8  -7   95.91    5.25
   0  -8   7  107.20    6.08
  -4  -2 -12   13.57    0.88
  -4   2  12   13.02    0.86
  -4  -2  12   13.71    0.91
   4   2 -12   13.65    1.09
  -4   2 -12   13.73    0.91
   4  -2 -12   13.22    1.08
   4   2 -12   13.50    1.06
  -1  -9  -2    5.56    0.67
   1  -9  -2    6.63    0.74
  -1   9  -2    6.62    0.64
  -1   9   2    6.11    0.64
   1   9  -2    5.18    0.63
  -1   9  -2    5.55    0.57
  -1  -9   2    6.46    0.86
   2   8  -6   20.13    1.37
   2  -8   6   20.74    1.69
  -2   8  -6   19.13    1.27
  -2   8  -6   20.80    1.29
  -2   8   6   20.17    1.28
  -2  -8   6   20.11    1.71
  -2  -8  -6   19.24    1.27
   2   8  -6   12.56    1.21
  -5  -6   6    4.71    0.81
  -5   6   6    5.06    0.49
   5  -6   6    5.23    0.93
   5   6  -6    4.68    0.72
   5  -6  -6    5.34    0.55
  -5   6  -6    5.06    0.45
   5   6  -6    4.32    0.75
  -5   7  -2    7.73    0.58
  -5  -7  -2    7.49    0.67
  -5   7   2    6.38    0.55
  -5   7  -2    7.44    0.61
   5  -7   2    7.68    0.80
   5  -7  -2    7.43    0.69
  -5  -7   2    6.93    0.66
   6  -4  -7    7.41    0.61
   6   4  -7    8.78    1.00
  -6   4   7    8.34    0.63
  -6  -4  -7    7.63    0.56
   6   4  -7    6.42    0.83
  -6   4   7    7.38    0.53
  -6   4  -7    8.07    0.60
  -6  -6   0   30.81    2.09
  -6   6   0   38.47    2.17
  -6   6   0   38.02    2.46
   6  -6   0   35.39    2.42
  -7   2   6   44.51    2.88
  -7  -2   6   46.09    3.01
  -7  -2  -6   46.54    2.97
  -5  -5   8   11.53    0.96
   5  -5   8    8.06    0.99
  -5  -5   8    9.97    1.01
   5  -5  -8   10.43    0.84
  -5   5   8    9.44    0.74
   5   5  -8    9.14    0.99
  -5   5  -8   10.17    0.79
   5   5  -8   10.64    1.08
   6  -6  -1   19.54    1.45
  -6   6  -1   21.67    1.50
   6  -6   1   19.92    1.52
  -6   6   1   21.71    1.46
  -6   6  -1   20.94    1.41
  -6  -6  -1   22.30    1.57
  -6  -6   1   22.24    1.59
  -6   6   1   20.75    1.44
   0   4 -13   29.93    2.06
   0   4 -13   33.87    2.29
   0   4  13   19.49    1.39
   0  -4 -13   30.76    2.11
   0  -4  13   31.62    2.26
   0  -9  -3   61.87    4.03
   0  -9   3   67.59    4.49
   0   9  -3   53.64    3.58
  -3  -2  13   36.57    2.40
   3   2 -13   38.03    2.62
  -3  -2 -13   37.17    2.43
   3  -2 -13   32.63    2.30
   3   2 -13   32.27    2.25
  -3   2 -13   35.42    2.33
  -3   2  13   34.15    2.23
  -7  -3   5   34.89    2.34
  -7   3   5   35.64    2.30
  -7   3   5   30.75    2.03
   7  -3  -5   32.55    2.17
  -7  -3  -5   27.18    1.80
  -7   3  -5   35.30    2.29
   1   5 -12   28.91    2.03
   1  -5  12   27.58    2.06
  -1  -5  12   27.30    2.01
   1   5  12   30.95    2.10
  -1   5 -12   26.40    1.83
  -1  -5  12   29.06    2.00
  -1   5  12   29.10    1.95
  -1   5 -12   30.80    2.07
   1   5 -12   29.75    2.05
  -1  -2 -14   95.90    6.09
   1   2 -14   92.06    5.85
   1  -2 -14   92.90    5.93
  -1   2 -14   85.66    5.47
  -1   2 -14   89.53    5.70
   1   2 -14   92.30    5.90
   2   0 -14   44.78    3.00
  -2   0  14   36.95    2.42
  -2   0 -14   35.08    2.31
   2   0 -14   37.32    2.52
   4   7  -6    7.75    0.90
  -4  -7   6    7.83    1.13
  -4   7  -6    7.05    0.63
   4   7  -6    7.11    0.88
   4  -7   6    7.59    1.12
  -4  -7   6    5.92    0.66
   4  -7  -6    6.69    0.70
  -6  -2   9    4.73    0.55
   6   2  -9    3.61    0.78
  -6   2   9    4.40    0.48
  -6   2  -9    5.09    0.51
  -6  -2  -9    4.79    0.44
   6  -2  -9    3.48    0.68
   0  -6 -11  138.88    8.68
   0   6 -11  118.87    7.54
   0  -6  11  116.51    7.78
   0   6  11  138.83    8.70
   1   8  -7    4.27    0.58
  -1  -8   7    4.58    1.11
   1   8   7    4.44    0.55
   1   8  -7    4.45    0.57
   1  -8  -7    4.90    0.60
  -1  -8  -7    4.55    0.55
  -1   8   7    5.23    0.58
   1  -8   7    4.23    1.06
  -1   8  -7    4.00    0.52
  -1   8  -7    2.61    0.42
  -7   4  -3   70.80    4.47
  -7  -4   3   69.85    4.47
   7  -4  -3   64.56    4.17
  -7  -4  -3   69.17    4.36
  -7  -4  -3   70.98    4.54
  -7   4   3   65.95    4.20
  -7   4   3   69.79    4.39
  -4  -8   0    6.03    0.86
   4  -8   0    4.37    0.67
  -4   8   0    4.08    0.48
  -7   0  -7    5.39    0.51
  -7   0   7    4.59    0.54
  -8   0   0   87.80    5.50
  -8   0   0   84.15    5.31
  -6   6  -2   28.17    1.86
  -6  -6   2   27.47    1.87
  -6   6  -2   29.29    1.99
  -6  -6  -2   30.93    2.09
   6  -6  -2   31.07    2.13
   6  -6   2   30.77    2.22
  -6   6   2   28.62    1.88
  -6   6   2   26.24    1.77
   4  -8  -1   86.21    5.54
  -4   8  -1   82.30    5.22
  -4   8   1   82.84    5.25
  -4  -8   1   85.87    5.64
   4  -8   1   81.84    5.29
  -4  -8  -1   82.78    5.39
   2   1 -14   12.88    1.05
  -2   1  14   12.35    0.90
  -2  -1  14   10.87    0.84
  -2   1 -14   12.87    0.97
  -2  -1 -14   12.37    0.93
   2  -1 -14   12.87    1.05
   2   1 -14   13.40    1.12
  -1   4  13   24.88    1.69
   1   4 -13   19.09    1.41
  -1   4 -13   17.82    1.32
   1  -4 -13   22.63    1.63
  -1  -4  13   24.96    1.71
   1   4 -13   22.26    1.60
  -1  -4  13   23.58    1.74
  -1   4 -13   25.67    1.77
   1  -4  13   22.14    1.67
  -1  -4 -13   23.70    1.67
   1   9   3   38.86    2.62
  -1  -9  -3   36.61    2.48
   1   9  -3   36.45    2.54
   1  -9  -3   39.49    2.66
  -1   9  -3   39.32    2.64
  -1   9  -3   36.97    2.51
  -1  -9   3   36.23    2.61
  -8   0   1   36.97    2.39
  -8   0  -1   37.25    2.40
  -8   0   1   39.08    2.55
  -8   0  -1   35.63    2.34
   5   7  -3    0.38    0.61
  -5  -7  -3    0.35    0.35
  -5   7  -3    0.36    0.28
  -5  -7   3    0.46    0.44
   5  -7   3    0.37    0.58
   5  -7  -3    0.09    0.43
  -5   7  -3   -0.09    0.22
  -5   7   3   -0.24    0.29
   3   5 -11    3.66    0.57
  -3   5  11    4.85    0.49
  -3  -5 -11    4.40    0.48
  -3  -5  11    3.39    0.47
   3  -5  11    4.48    0.75
  -3  -5  11    3.87    0.70
   3   5 -11    4.74    0.68
   3  -8   5  159.49   10.62
  -3  -8  -5  174.03   10.89
   3  -8  -5  185.11   11.22
  -3  -8   5  189.19   11.71
  -3   8  -5  181.24   11.01
   3   8  -5  166.80   10.57
  -3   8  -5  184.84   11.18
   2  -9   0    6.60    0.81
   2   9   0    4.11    0.65
  -2  -9   0    5.76    0.84
  -2   9   0    5.96    0.65
   1   6 -11   19.96    1.48
   1  -6 -11   24.70    1.70
  -1  -6  11   24.58    1.71
  -1  -6 -11   23.58    1.63
   1  -6  11   23.66    1.93
  -1   6 -11   23.59    1.63
  -1  -6  11   25.56    2.00
   1  -6  11   17.99    1.40
  -1   6  11   22.55    1.56
   1   6  11   22.63    1.66
  -1   6 -11   23.22    1.63
  -7  -1  -7    5.02    0.47
  -7   1  -7    5.15    0.51
  -7  -1   7    4.10    0.50
  -7   1   7    4.50    0.45
   3   4 -12   73.98    4.80
   3  -4 -12   75.97    4.99
   3   4 -12   69.51    4.55
   3  -4  12   85.28    5.52
  -3  -4  12   77.05    4.92
  -3   4 -12   81.31    5.16
  -3   4  12   78.84    4.99
  -3  -4  12   90.62    5.83
  -4   4  11   19.74    1.36
   4  -4  11   22.16    1.70
  -4  -4  11   18.50    1.34
   4  -4 -11   20.12    1.58
  -4   4 -11   21.30    1.46
   4   4 -11   17.74    1.38
   4   4 -11   15.85    1.29
   5   2 -11   32.63    2.36
   5  -2 -11   30.72    2.37
   5   2 -11   28.27    2.19
  -5   2 -11   32.34    2.13
  -5  -2 -11   33.95    2.22
  -5   2  11   30.34    2.12
  -5  -2  11   34.06    2.27
  -8   1   0   25.45    1.68
  -8  -1   0   25.15    1.71
  -8   1   0   24.97    1.69
   2  -9  -1   74.20    4.79
  -2  -9   1   64.13    4.25
   2   9  -1   72.78    4.83
  -2   9   1   73.56    4.72
  -2   9  -1   72.11    4.64
   2  -9   1   76.75    4.99
  -2  -9  -1   72.33    4.71
   4   5 -10   45.62    3.09
   4   5 -10   43.14    2.97
  -4  -5  10   40.55    2.70
   4  -5  10   45.44    3.19
  -4   5 -10   43.64    2.83
  -4   5  10   37.74    2.69
  -4  -5  10   45.38    3.12
  -4  -8   2   28.50    2.25
  -4   8  -2   26.25    1.77
   4  -8   2   26.89    1.97
  -4   8   2   28.57    1.93
   4   8  -2   26.21    2.04
  -4  -8  -2   28.01    2.02
   4  -8  -2   28.49    1.99
  -4   8  -2   27.12    1.85
  -3  -7  -8   50.60    3.29
   3   7  -8   50.68    3.40
  -3   7  -8   46.72    3.04
  -3  -7   8   52.75    3.71
  -3  -7   8   44.40    2.91
  -3   7   8   49.49    3.19
   3  -7   8   48.54    3.50
   3  -7  -8   47.97    3.11
   3   7  -8   49.71    3.36
  -8  -1  -1  109.59    6.90
  -8  -1   1   96.66    6.04
  -8   1  -1   98.09    6.13
  -8  -1   1  110.09    6.91
  -8   1  -1  109.63    6.87
  -8   1   1  104.87    6.61
  -8   1   1  110.03    6.86
  -2   7   9   -0.09    0.27
  -2   7  -9    0.14    0.31
  -2   7  -9   -0.03    0.28
   2   7  -9   -0.12    0.34
   2  -7  -9    0.35    0.37
  -2  -7  -9    0.19    0.38
   2   7  -9   -0.24    0.33
  -2  -7   9    0.55    0.41
   2  -7   9    0.86    0.93
  -2  -7   9    0.27    0.86
  -8   0  -2    2.41    0.35
  -8   0   2    2.36    0.36
  -8   0   2    2.04    0.39
   0  -9   4    6.13    0.98
   0   9  -4    8.70    0.82
   0   9   4    8.28    0.79
   0  -9  -4    8.80    0.87
  -6  -5  -6   19.46    1.32
  -6   5  -6   21.79    1.48
  -6   5   6   22.27    1.54
  -6  -5   6   20.47    1.48
   6  -5  -6   20.75    1.46
   6  -6   3   42.60    2.96
  -6   6  -3   45.60    2.93
  -6  -6  -3   49.06    3.19
  -6  -6   3   47.41    3.10
  -6   6   3   41.96    2.72
   6  -6  -3   43.54    2.88
  -6   6  -3   48.01    3.10
   2   9  -2   10.78    1.03
  -2  -9   2   10.38    1.15
   2  -9   2   10.82    1.04
  -2   9  -2    9.60    0.85
  -2  -9  -2    9.89    0.96
  -2   9   2   10.56    0.89
  -7   4   4   24.50    1.65
   7  -4  -4   25.86    1.77
  -7   4   4   26.22    1.73
  -7   4  -4   27.79    1.83
  -7  -4   4   24.80    1.72
  -7  -4  -4   26.90    1.80
  -8   1   2  122.32    7.64
  -8  -1  -2  134.41    8.36
  -8   1  -2  132.45    8.24
  -8  -1   2  123.58    7.76
  -8  -1  -2  132.24    8.26
  -8   1   2  126.11    7.88
   0   3 -14   46.85    3.07
   0  -3 -14   47.76    3.15
   0   3 -14   41.81    2.78
  -3  -6  10    1.99    0.81
  -3   6  10    2.35    0.38
  -3  -6  10    2.12    0.46
  -3  -6 -10    2.73    0.42
   3  -6  10    2.63    0.89
  -3   6 -10    2.27    0.36
   3   6 -10    2.30    0.52
   3  -6 -10    2.31    0.45
   6   0 -10    3.53    0.77
   6   0 -10    3.07    0.69
  -6   0  10    1.44    0.38
  -6   0 -10    1.96    0.34
  -1  -9  -4    0.60    0.48
  -1   9   4    0.70    0.40
   1   9   4    1.13    0.38
  -1  -9   4    0.81    0.88
   1  -9  -4    0.05    0.52
   1   9  -4    1.44    0.42
  -1   9  -4    1.11    0.35
  -2  -5  12   92.46    5.97
  -2   5  12   92.48    5.82
   2   5 -12   94.87    6.06
  -2   5 -12   91.06    5.77
   2   5 -12   84.71    5.47
   2  -5  12   89.55    5.81
  -2  -5  12   93.01    5.89
  -4  -3  12   66.14    4.23
  -4   3  12   65.71    4.17
  -4   3 -12   67.85    4.31
   4   3 -12   57.61    3.95
   4  -3 -12   67.04    4.41
   4   3 -12   46.09    3.15
   5   7  -4   86.64    5.69
  -5  -7  -4   93.42    5.90
  -5   7  -4   92.98    5.85
  -5   7   4   92.56    5.83
  -5  -7   4   92.38    5.84
  -5   7  -4   87.75    5.56
   5  -7   4   92.71    6.05
   5  -7  -4   97.45    6.17
  -2   2  14   30.79    2.04
   2   2 -14   31.10    2.15
  -2   2 -14   26.19    1.78
   2  -2 -14   27.33    1.94
   2   2 -14   25.55    1.82
  -2  -2  14   29.29    1.95
  -4   8   3   12.19    0.95
   4   8  -3   12.93    1.22
  -4   8  -3   13.60    1.00
   4  -8  -3   13.30    1.10
  -4   8  -3   14.20    1.09
  -4  -8   3   13.34    1.41
   4  -8   3   12.54    1.20
  -7  -3   6   97.34    6.14
  -7   3   6   98.01    6.16
   7  -3  -6  100.21    6.31
  -7  -3  -6   97.81    6.12
  -7   3   6   94.10    5.90
  -7   3  -6  101.94    6.37
   2  -8  -7    9.10    0.83
  -2   8  -7    7.75    0.68
  -2  -8   7    8.31    1.16
   2  -8   7    8.27    1.27
  -2  -8  -7    8.20    0.76
  -2   8   7    6.78    0.64
   2   8  -7    9.22    0.90
  -8   0   3   62.68    4.01
   5   6  -7    0.79    0.58
  -5  -6   7    1.48    0.41
   5  -6  -7    1.15    0.41
   5  -6   7    1.30    0.83
   5   6  -7    1.08    0.58
  -5  -6   7    1.01    0.63
  -5   6  -7    1.35    0.29
  -7  -2  -7   16.14    1.11
  -7  -2   7   18.18    1.32
  -7   2   7   16.72    1.18
   0   7  10   29.38    2.00
   0   7 -10   24.50    1.73
   0  -7 -10   27.26    1.85
   0   7 -10   27.96    1.94
  -8   2   0   24.81    1.67
  -8  -2   0   25.86    1.77
  -8   2   0   26.16    1.73
  -8  -2   0   24.38    1.63
   3   3 -13   12.71    1.08
  -3  -3  13   12.21    0.94
  -3   3  13    9.74    0.76
   3   3 -13    9.18    0.86
   3  -3 -13   11.81    1.04
  -3   3 -13   10.24    0.80
  -6   1 -10   30.90    2.04
   6   1 -10   49.24    3.38
  -6   1  10   33.72    2.22
  -6  -1  10   31.34    2.14
  -6  -1 -10   38.10    2.47
   6  -1 -10   33.07    2.44
   6   1 -10   41.93    2.99
   1   3 -14   92.51    5.90
  -1   3 -14  102.35    6.46
   1  -3 -14   91.10    5.86
   1   3 -14   97.38    6.20
  -1  -3 -14  100.88    6.41
  -1   3 -14   64.66    4.19
   0   8  -8   47.66    3.15
   0  -8  -8   54.78    3.55
   0  -8   8   53.11    3.76
   0   8   8   55.47    3.61
   0   8  -8   48.91    3.26
  -2   4 -13   10.69    0.86
   2  -4  13   10.82    1.04
  -2  -4  13   11.36    1.11
   2   4 -13    9.52    0.89
   2   4 -13    9.05    0.85
  -2  -4  13    9.78    0.81
  -2   4  13   10.03    0.78
   2  -9   3    2.48    0.75
  -2  -9   3    1.34    0.77
  -2   9  -3    2.02    0.37
  -2   9  -3    1.88    0.42
   2   9  -3    2.05    0.54
  -2  -9  -3    1.42    0.56
  -2   9   3    1.66    0.46
  -4   0 -13    0.34    0.28
   4   0 -13    0.03    0.44
  -4   0  13    0.63    0.29
   4   0 -13    0.18    0.40
  -8   2  -1  107.75    6.53
  -8   2  -1  102.26    6.23
  -8  -2   1  103.79    6.34
  -8   2   1  105.28    6.38
  -8  -2  -1   95.44    5.85
  -8  -2  -1   99.63    6.05
  -8   2   1   96.51    5.95
  -5  -4  10   11.10    0.90
   5  -4  10    9.06    0.90
   5   4 -10   11.27    1.09
  -5   4  10    9.99    0.77
   5  -4 -10   10.96    1.11
   5   4 -10   10.22    0.98
  -6  -3   9   16.31    1.18
  -6   3   9   17.51    1.20
   6   3  -9   18.65    1.58
  -6  -3  -9   18.44    1.23
   6  -3  -9   18.04    1.50
   6   3  -9   17.86    1.49
  -6  -4  -8   17.07    1.14
   6   4  -8   19.00    1.57
  -6  -4   8   19.02    1.36
  -6   4  -8   18.57    1.26
   6   4  -8   18.19    1.50
  -4   6   9   50.73    3.21
  -4   6  -9   54.94    3.78
   4  -6   9   58.69    3.95
  -4  -6   9   57.50    3.80
  -4  -6   9   55.71    3.53
   4   6  -9   58.27    3.81
   4  -6  -9   61.29    3.84
   4   7  -7   48.18    3.23
  -4   7   7   50.70    3.18
  -4   7  -7   52.21    3.27
  -4  -7   7   52.38    3.56
   4  -7   7   54.68    3.75
  -4  -7   7   50.10    3.19
   4  -7  -7   57.80    3.63
   4   7  -7   51.86    3.46
  -8   1  -3    9.26    0.69
  -8  -1   3    8.83    0.75
  -8   1   3   10.37    0.80
  -8  -1  -3    8.91    0.69
  -8   1   3    9.29    0.72
   2  -6  11   66.10    4.35
  -2   6  11   68.13    4.22
  -2  -6  11   49.50    3.35
   2   6 -11   61.41    3.95
  -2  -6 -11   67.19    4.17
  -2   6 -11   62.49    3.91
  -2  -6  11   65.00    4.07
  -7  -5   0    4.03    0.53
  -7   5   0    3.68    0.38
  -7   5   0    3.42    0.42
  -3   8  -6   22.31    1.57
  -3  -8   6   23.02    2.02
   3  -8   6   23.56    1.94
  -3  -8  -6   24.52    1.70
  -3   8  -6   23.20    1.57
   3   8  -6   20.07    1.55
   3  -8  -6   23.76    1.63
  -3  -8   6   21.60    1.49
  -3   8   6   20.78    1.43
   6  -6  -4   26.47    1.79
  -6  -6  -4   22.18    1.45
  -6  -6   4   24.04    1.65
  -6   6   4   24.39    1.62
  -6   6  -4   24.01    1.57
  -6  -6  -4   24.42    1.65
   6  -6   4   26.55    2.05
   1  -7  10    2.49    0.94
  -1  -7  10    2.88    0.93
  -1  -7 -10    2.43    0.42
   1  -7 -10    2.67    0.52
   1   7 -10    2.82    0.43
  -1   7 -10    2.70    0.43
  -1   7 -10    2.31    0.43
   1   7 -10    2.41    0.47
  -1  -7  10    2.82    0.46
  -1   7  10    2.25    0.39
   1   7  10    2.30    0.40
  -7   5   1   48.36    3.04
  -7   5  -1   49.31    3.09
  -7   5   1   47.70    2.96
  -7   5  -1   46.19    2.87
  -7  -5  -1   44.98    2.87
  -7  -5   1   46.28    2.96
  -4   1  13   36.58    2.33
   4   1 -13   32.54    2.23
  -4  -1  13   39.31    2.50
  -4  -1 -13   39.22    2.48
   4  -1 -13   25.60    2.14
  -4   1 -13   38.66    2.45
   4   1 -13   38.93    2.64
   0  -9   5   17.62    1.55
   0   9  -5   17.88    1.32
   0  -9  -5   15.82    1.21
   0   9   5   17.83    1.33
  -8  -2  -2   16.83    1.15
  -8   2   2   16.22    1.12
  -8  -2  -2   16.29    1.16
  -8  -2   2   16.78    1.21
  -8   2   2   16.73    1.13
  -8   2  -2   16.91    1.14
   1   8  -8   41.25    2.69
   1  -8   8   45.83    3.26
   1   8   8   43.98    2.85
  -1  -8  -8   45.27    2.89
  -1   8   8   43.09    2.76
   1   8  -8   26.81    2.08
   1  -8  -8   43.52    2.77
  -1   8  -8   41.80    2.71
  -1  -8   8   43.19    3.12
  -5  -5   9   50.16    3.29
   5   5  -9   51.76    3.44
   5   5  -9   48.22    3.22
  -5   5   9   50.75    3.18
  -5  -5   9   52.69    3.34
   5  -5  -9   53.36    3.35
   5  -5   9   56.60    3.77
  -5   5  -9   51.29    3.22
   0   0 -15   -0.11    0.32
   0   0 -15   -0.53    0.34
  -7   0  -8    1.04    0.25
   5   3 -11    9.15    0.91
  -5  -3 -11   10.53    0.77
   5  -3 -11   10.21    1.00
  -5  -3  11   11.06    0.87
  -5   3  11    9.86    0.75
   5   3 -11   10.22    1.05
  -5   3 -11    8.90    0.72
   3   0 -14   58.89    3.79
  -3   0 -14   58.25    3.63
  -3   0  14   58.47    3.63
  -7  -4   5   85.66    5.28
  -7   4   5   77.43    4.77
   7  -4  -5   93.60    5.75
  -7   4  -5   94.06    5.74
  -7  -4  -5   96.96    5.89
  -7   4   5   84.55    5.15
  -4   8  -4   13.18    1.01
  -4   8   4   13.38    0.98
   4  -8  -4   13.45    1.06
  -4  -8   4   12.35    1.46
   4  -8   4   13.85    1.29
  -4   8  -4   14.49    1.03
   4   8  -4   12.85    1.21
  -4  -8   4   11.89    0.92
   5   0 -12   19.93    1.58
  -5   0  12   19.27    1.32
  -5   0 -12   20.03    1.34
   5   0 -12   19.73    1.57
  -8   0  -4   65.13    3.99
  -8   0   4   63.94    3.96
  -7   5   2   10.42    0.75
  -7   5  -2   11.36    0.81
  -7   5   2   11.73    0.88
  -7   5  -2   10.53    0.80
  -7  -5   2   11.58    0.91
  -7  -5  -2   10.98    0.89
   0   1 -15    0.53    0.31
   0  -1 -15    0.46    0.37
   0   1 -15    0.27    0.35
  -1   9   5   22.93    1.59
  -1   9  -5   23.92    1.66
   1   9  -5   24.63    1.75
  -1  -9   5   21.09    1.77
   1   9   5   25.88    1.80
   1  -9  -5   25.25    1.76
  -1  -9  -5   23.09    1.62
  -7   1  -8    5.28    0.50
  -7  -1  -8    6.00    0.51
  -5   7  -5    4.18    0.43
  -5   7   5    4.26    0.49
   5   7  -5    5.19    0.80
  -5  -7   5    4.34    0.54
   5  -7  -5    4.25    0.54
   5  -7   5    3.21    0.87
  -3   1  14    5.56    0.49
  -3   1 -14    5.91    0.56
   3  -1 -14    5.30    0.67
   3   1 -14    5.69    0.69
  -3  -1  14    5.43    0.51
  -3  -1 -14    6.62    0.60
   3   1 -14    6.11    0.67
  -1   0 -15   73.70    4.61
  -1   0 -15   76.84    4.76
   1   0 -15   67.62    4.26
  -6  -2  10  145.90    8.85
   6   2 -10  150.80    9.54
  -6   2 -10  148.97    9.01
  -6  -2 -10  152.04    9.18
   6  -2 -10  128.88    8.43
  -6   2  10  145.35    8.86
  -2  -9   4   14.30    1.40
   2   9  -4   15.26    1.24
  -2   9  -4   13.42    1.06
  -2  -9  -4   13.56    1.11
   2  -9   4   14.91    1.37
  -2   9  -4   13.51    1.02
  -5   1  12    1.40    0.36
   5   1 -12    2.26    0.62
  -5   1 -12    1.49    0.29
  -5  -1 -12    1.86    0.31
   5  -1 -12    1.78    0.53
  -5  -1  12    2.11    0.37
   5   1 -12    1.95    0.58
   3  -9   0   21.63    1.61
  -3   9   0   21.99    1.53
  -3  -9   0   21.25    1.65
  -6   5   7    1.05    0.31
   6   5  -7    1.89    0.68
  -6   5  -7    0.41    0.30
   6   5  -7    0.25    0.58
  -6  -5  -7    0.56    0.26
   6  -5  -7    0.80    0.32
  -8  -1   4   19.67    1.39
  -8   1  -4   18.59    1.24
  -8  -1  -4   20.48    1.36
  -8   1   4   21.93    1.44
  -8   1   4   21.18    1.44
  -8   2   3   17.15    1.15
  -8  -2   3   14.81    1.07
  -8  -2  -3   15.97    1.08
  -8   2  -3   17.35    1.16
  -8   2   3   15.18    1.06
  -3   9  -1   54.09    3.43
  -3   9   1   53.90    3.40
   3   9  -1   48.05    3.53
   3  -9  -1   52.16    3.37
  -3  -9  -1   54.33    3.55
  -3  -9   1   56.33    3.71
   3  -9   1   55.15    3.58
   0  -5  13   27.65    1.99
   0   5 -13   29.35    1.98
   1   1 -15   20.94    1.49
   1  -1 -15   22.82    1.65
  -1  -1 -15   22.88    1.59
  -1   1 -15   24.10    1.62
  -3  -7   9    4.58    0.60
   3   7  -9    4.99    0.68
   3   7  -9    4.76    0.63
  -3   7   9    4.89    0.50
  -3   7  -9    4.16    0.49
  -3  -7  -9    5.48    0.56
   3  -7   9    4.12    1.01
  -3  -7   9    4.53    0.92
   3  -7  -9    4.82    0.53
   2  -3 -14    5.14    0.61
   2   3 -14    4.46    0.61
   2   3 -14    5.66    0.65
  -2   3  14    5.48    0.50
  -2   3 -14    5.75    0.58
  -4  -2  13   75.45    4.68
   4   2 -13   78.28    4.96
  -4  -2 -13   75.08    4.63
  -4   2 -13   76.97    4.73
   4  -2 -13   73.90    4.71
  -4   2  13   76.39    4.69
  -7   5   3   81.21    5.00
  -7   5   3   88.74    5.43
  -7  -5  -3   89.07    5.44
  -7   5  -3   93.16    5.67
  -7  -5  -3   89.24    5.49
  -7  -5   3   83.54    5.19
   6  -6  -5   13.18    1.02
  -6  -6  -5   12.28    0.87
  -6   6  -5   12.43    0.90
   6   6  -5    9.86    1.19
   0   6  12    5.50    0.55
   0  -6  12    4.33    0.87
   0  -6 -12    5.37    0.54
   0   6 -12    5.46    0.59
  -7   3   7  108.65    6.58
   7  -3  -7  120.15    7.32
  -7   3  -7  117.41    7.16
  -7  -3  -7  118.46    7.17
   3  -9  -2    8.71    0.87
  -3  -9  -2    7.33    0.82
   3  -9   2    8.16    0.89
  -3   9  -2   10.16    0.85
   3   9  -2    8.29    0.92
  -3  -9   2    7.47    1.09
  -8   3   0   43.86    2.73
  -8  -3   0   43.81    2.79
  -8   3   0   41.83    2.64
   2  -7  10    0.63    0.82
  -2  -7  10    0.22    0.40
  -2   7  10    0.53    0.31
  -2   7 -10   -0.00    0.30
  -2   7 -10    0.51    0.30
   2   7 -10    0.11    0.37
  -2  -7 -10    0.17    0.35
   2   7 -10    0.44    0.39
   1   5 -13    0.84    0.44
  -1   5 -13    0.92    0.40
  -1   5  13    1.17    0.30
   1  -5  13    2.21    0.66
  -8  -3  -1   22.98    1.56
  -8   3   1   21.52    1.46
  -8   3  -1   23.73    1.57
  -8   3   1   23.34    1.52
  -8   3  -1   21.10    1.39
  -8  -3   1   24.01    1.62
  -2   8  -8    2.42    0.42
  -2  -8  -8    2.69    0.49
  -2  -8   8    2.11    0.44
  -2   8   8    2.15    0.38
   2   8  -8    2.37    0.54
   2  -8   8    2.73    0.98
   0  -2 -15   14.69    1.13
   0   2 -15   12.74    0.98
  -5  -6   8   14.54    1.11
   5  -6  -8   15.59    1.13
   5  -6   8   14.49    1.44
   5   6  -8   12.34    1.15
  -5  -6   8   14.95    1.33
  -5   6  -8   14.99    1.06
   3   5 -12    5.02    0.65
  -3  -5  12    5.57    0.63
  -3  -5  12    5.25    0.81
   3  -5  12    4.89    0.78
  -3   5  12    5.01    0.48
  -4   5  11   52.90    3.30
  -4  -5  11   52.54    3.31
   4  -5  11   48.01    3.22
  -4  -5  11   53.49    3.50
   4   5 -11   46.99    3.10
;

_shelx_hkl_checksum   50422

#==============================================================================
#     End of CIF
#==============================================================================
