# Supplementary material for: Solid State Structure and Hydrogen Bonding of Some Cyclic NH Carboximides
Source: MDPI journal article supplement (doi:10.3390/cryst13010150), 2023-01-15
Supplement: s1 [file s1 › 8.cif]

data_8
_audit_creation_date                               2020-08-20
_audit_creation_method                            'by CrystalStructure 4.3'

_publ_section_references
;
    ENTER OTHER REFERENCES

    Rigaku (2018). CrystalStructure. Version 4.3. 
    Rigaku Corporation, Tokyo, Japan.

    Sheldrick, G. M. (2014). Acta Cryst. (2014). A70, C1437.
    SHELXT Version 2018/2

    Sheldrick, G.M. (2008) SHELXL Version 2018/3, Acta Cryst. A64, 112-122.

    Rigaku Oxford Diffraction (2015), CrysAlisPro. version 1.171.39.8d.
    Rigaku Corporation, Tokyo, Japan

;


_chemical_formula_sum                             'C8 H3 Cl4 N O2'
_chemical_formula_moiety                          'C8 H3 Cl4 N O2'
_chemical_formula_weight                           286.93
_chemical_melting_point                            ?

#==============================================================================
# CRYSTAL DATA
_space_group_crystal_system                        monoclinic
_space_group_name_H-M_alt                         'P 1 21/c 1'
_space_group_name_Hall                            '-P 2ybc'
_space_group_IT_number                             14
loop_
_space_group_symop_id
_space_group_symop_operation_xyz
1   '+X,+Y,+Z'
2   '-X,1/2+Y,1/2-Z'
3   '-X,-Y,-Z'
4   '+X,-1/2-Y,-1/2+Z'
#------------------------------------------------------------------------------
_cell_length_a                                     6.4439(4)
_cell_length_b                                     5.8690(3)
_cell_length_c                                     26.8276(19)
_cell_angle_alpha                                  90.0000
_cell_angle_beta                                   95.696(6)
_cell_angle_gamma                                  90.0000
_cell_volume                                       1009.59(11)
_cell_formula_units_Z                              4
_cell_measurement_reflns_used                      5494
_cell_measurement_theta_min                        3.05
_cell_measurement_theta_max                        28.05
_cell_measurement_temperature                      93
#------------------------------------------------------------------------------
_exptl_crystal_description                         plate
_exptl_crystal_colour                              colourless
_exptl_crystal_size_max                            0.100
_exptl_crystal_size_mid                            0.100
_exptl_crystal_size_min                            0.020
_exptl_crystal_density_diffrn                      1.888
_exptl_crystal_density_meas                        ?
_exptl_crystal_density_method                     'not measured'
_exptl_crystal_F_000                               568.00
_exptl_absorpt_coefficient_mu                      1.143
_exptl_absorpt_correction_type                     multi-scan
_exptl_absorpt_process_details
;
CrysAlisPro 1.171.39.8d (Rigaku Oxford Diffraction, 2015)
Empirical absorption correction using spherical harmonics,
 implemented in SCALE3 ABSPACK scaling algorithm.
;
_exptl_absorpt_correction_T_min                    0.802
_exptl_absorpt_correction_T_max                    0.977

#==============================================================================
# EXPERIMENTAL DATA

_diffrn_ambient_temperature                        93
_diffrn_radiation_type                            'Mo K\a'
_diffrn_radiation_wavelength                       0.71073
_diffrn_measurement_device_type                   'Rigaku XtaLAB P200'
_diffrn_measurement_method                         \w
_diffrn_detector_area_resol_mean                   5.811
_diffrn_reflns_number                              9882
_diffrn_reflns_av_unetI/netI                       0.0221
_diffrn_reflns_av_R_equivalents                    0.0365
_diffrn_reflns_theta_max                           28.139
_diffrn_reflns_theta_min                           3.052
_diffrn_reflns_theta_full                          25.242
_diffrn_measured_fraction_theta_max                0.866
_diffrn_measured_fraction_theta_full               0.999
_diffrn_reflns_Laue_measured_fraction_max          0.866
_diffrn_reflns_Laue_measured_fraction_full         0.999
_diffrn_reflns_point_group_measured_fraction_max   0.866
_diffrn_reflns_point_group_measured_fraction_full  0.999
_diffrn_reflns_limit_h_min                        -8
_diffrn_reflns_limit_h_max                         8
_diffrn_reflns_limit_k_min                        -7
_diffrn_reflns_limit_k_max                         6
_diffrn_reflns_limit_l_min                        -32
_diffrn_reflns_limit_l_max                         32
_diffrn_standards_number                           0
_diffrn_standards_interval_count                   .
_diffrn_standards_decay_%                          ?
_reflns_number_total                               2148
_reflns_number_gt                                  1972
_reflns_threshold_expression                       F^2^>2.0\s(F^2^)
_reflns_Friedel_coverage          0.000
_reflns_Friedel_fraction_max      .
_reflns_Friedel_fraction_full     .

#==============================================================================
# REFINEMENT DATA

_refine_special_details
;
    Refinement was performed using all reflections. The weighted 
    R-factor (wR) and goodness of fit (S) are based on F^2^.
    R-factor (gt) are based on F. The threshold expression of
    F^2^ > 2.0 sigma(F^2^) is used only for calculating R-factor (gt).
;
_refine_ls_structure_factor_coef                   Fsqd
_refine_ls_R_factor_all                            0.0324
_refine_ls_R_factor_gt                             0.0303
_refine_ls_wR_factor_ref                           0.0862
_refine_ls_wR_factor_gt                            0.0848
_refine_ls_number_restraints                       1
_refine_ls_hydrogen_treatment                      mixed
_refine_ls_number_reflns                           2148
_refine_ls_number_parameters                       140
_refine_ls_goodness_of_fit_ref                     1.006
_refine_ls_weighting_scheme                        calc
_refine_ls_weighting_details
           'w = 1/[\s^2^(Fo^2^)+(0.0658P)^2^+0.2659P] where P=(Fo^2^+2Fc^2^)/3'
_atom_sites_solution_hydrogens                     geom
_atom_sites_solution_primary                       direct
_atom_sites_solution_secondary                     difmap
_refine_ls_shift/su_max                            0.001
_refine_diff_density_max                           0.58
_refine_diff_density_min                          -0.28
_refine_ls_extinction_method                       none
_refine_ls_extinction_coef                         ?

loop_
_atom_type_symbol
_atom_type_description
_atom_type_scat_dispersion_real
_atom_type_scat_dispersion_imag
_atom_type_scat_source
  'C' 'C'  0.0033 0.0016 
;
International Tables for Crystallography
(Vol. C, Tables 4.2.6.8 and 6.1.1.4)
;
  'H' 'H'  0.0000 0.0000 
;
International Tables for Crystallography
(Vol. C, Table 6.1.1.4)
;
  'Cl' 'Cl'  0.1484 0.1585 
;
International Tables for Crystallography
(Vol. C, Tables 4.2.6.8 and 6.1.1.4)
;
  'N' 'N'  0.0061 0.0033 
;
International Tables for Crystallography
(Vol. C, Tables 4.2.6.8 and 6.1.1.4)
;
  'O' 'O'  0.0106 0.0060 
;
International Tables for Crystallography
(Vol. C, Tables 4.2.6.8 and 6.1.1.4)
;

#==============================================================================
# ATOMIC COORDINATES AND THERMAL PARAMETERS

loop_
 _atom_site_label
 _atom_site_type_symbol
 _atom_site_fract_x
 _atom_site_fract_y
 _atom_site_fract_z
 _atom_site_U_iso_or_equiv
 _atom_site_adp_type
 _atom_site_occupancy
 _atom_site_site_symmetry_order  
 _atom_site_calc_flag
 _atom_site_refinement_flags_posn
 _atom_site_refinement_flags_adp
 _atom_site_refinement_flags_occupancy
 _atom_site_disorder_assembly
 _atom_site_disorder_group
Cl4 Cl 0.83433(7) 0.24970(7) 0.35377(2) 0.02141(14) Uani 1 1 d . . . . .
Cl5 Cl 0.63292(6) 0.12105(7) 0.45317(2) 0.01928(14) Uani 1 1 d . . . . .
Cl6 Cl 0.22372(6) 0.36216(7) 0.47772(2) 0.01952(13) Uani 1 1 d . . . . .
Cl7 Cl 0.06286(7) 0.79570(7) 0.41826(2) 0.02155(14) Uani 1 1 d . . . . .
O2 O 0.4174(2) 0.2514(2) 0.27142(5) 0.0250(3) Uani 1 1 d . . . . .
O9 O 0.0709(2) 0.9057(2) 0.30331(5) 0.0241(3) Uani 1 1 d . . . . .
N1 N 0.2043(2) 0.5623(2) 0.27971(5) 0.0173(3) Uani 1 1 d D . . . .
C2 C 0.3805(3) 0.4295(3) 0.29144(6) 0.0167(3) Uani 1 1 d . . . . .
C3 C 0.5150(2) 0.5514(3) 0.33378(6) 0.0152(3) Uani 1 1 d . . . . .
H3 H 0.627782 0.637126 0.318834 0.018 Uiso 1 1 calc R U . . .
C4 C 0.6149(2) 0.3835(3) 0.37118(6) 0.0157(3) Uani 1 1 d . . . . .
C5 C 0.5293(2) 0.3310(3) 0.41300(6) 0.0151(3) Uani 1 1 d . . . . .
C6 C 0.3414(2) 0.4547(3) 0.42636(6) 0.0153(3) Uani 1 1 d . . . . .
C7 C 0.2688(2) 0.6385(3) 0.40013(6) 0.0155(3) Uani 1 1 d . . . . .
C8 C 0.3643(3) 0.7255(3) 0.35427(6) 0.0148(3) Uani 1 1 d . . . . .
H8 H 0.436206 0.874500 0.361581 0.018 Uiso 1 1 calc R U . . .
C9 C 0.1937(3) 0.7493(3) 0.30992(6) 0.0162(3) Uani 1 1 d . . . . .
H1 H 0.108(3) 0.531(4) 0.2501(6) 0.037(6) Uiso 1 1 d D . . . .

loop_
 _atom_site_aniso_label
 _atom_site_aniso_U_11
 _atom_site_aniso_U_22
 _atom_site_aniso_U_33
 _atom_site_aniso_U_23
 _atom_site_aniso_U_13
 _atom_site_aniso_U_12
Cl4 0.0161(2) 0.0254(2) 0.0234(3) 0.00369(16) 0.00542(17) 0.00983(15)
Cl5 0.0204(2) 0.0173(2) 0.0202(2) 0.00476(15) 0.00243(16) 0.00768(14)
Cl6 0.0203(2) 0.0195(2) 0.0198(2) 0.00383(15) 0.00718(17) 0.00495(15)
Cl7 0.0225(2) 0.0227(2) 0.0201(2) 0.00162(16) 0.00509(17) 0.01270(16)
O2 0.0309(7) 0.0204(7) 0.0236(7) -0.0064(5) 0.0020(6) 0.0041(5)
O9 0.0240(7) 0.0282(7) 0.0194(7) 0.0011(5) -0.0011(5) 0.0124(5)
N1 0.0143(7) 0.0206(7) 0.0166(7) -0.0013(5) -0.0003(5) 0.0001(5)
C2 0.0169(8) 0.0175(8) 0.0162(8) 0.0006(6) 0.0042(6) 0.0010(6)
C3 0.0120(8) 0.0162(8) 0.0174(8) 0.0012(6) 0.0022(6) 0.0019(6)
C4 0.0116(8) 0.0156(8) 0.0199(8) -0.0013(6) 0.0010(6) 0.0041(6)
C5 0.0145(8) 0.0126(7) 0.0177(8) 0.0005(6) -0.0008(6) 0.0037(6)
C6 0.0151(8) 0.0154(8) 0.0156(8) -0.0004(6) 0.0026(6) 0.0009(6)
C7 0.0133(8) 0.0156(8) 0.0176(8) -0.0026(6) 0.0012(6) 0.0040(6)
C8 0.0140(8) 0.0127(7) 0.0172(8) -0.0004(6) -0.0003(6) 0.0026(6)
C9 0.0128(8) 0.0195(8) 0.0164(8) 0.0027(6) 0.0023(6) 0.0021(6)

#==============================================================================
_computing_data_collection
                                    'CrysAlisPro 1.171.39.8d (Rigaku OD, 2015)'
_computing_cell_refinement
                                    'CrysAlisPro 1.171.39.8d (Rigaku OD, 2015)'
_computing_data_reduction
                                    'CrysAlisPro 1.171.39.8d (Rigaku OD, 2015)'
_computing_structure_solution
                                      'SHELXT Version 2018/2 (Sheldrick, 2014)'
_computing_structure_refinement
                                      'SHELXL Version 2018/3 (Sheldrick, 2008)'
_computing_publication_material
                                          'CrystalStructure 4.3 (Rigaku, 2018)'
_computing_molecular_graphics                     'CrystalStructure 4.3'

#==============================================================================
# MOLECULAR GEOMETRY

_geom_special_details
;
 All esds (except the esd in the dihedral angle between two l.s. planes)
 are estimated using the full covariance matrix.  The cell esds are taken
 into account individually in the estimation of esds in distances, angles
 and torsion angles; correlations between esds in cell parameters are only
 used when they are defined by crystal symmetry.  An approximate (isotropic)
 treatment of cell esds is used for estimating esds involving l.s. planes.
;

loop_
 _geom_bond_atom_site_label_1
 _geom_bond_atom_site_label_2
 _geom_bond_distance
 _geom_bond_site_symmetry_2
 _geom_bond_publ_flag
Cl4 C4 1.7222(16) . ?
Cl5 C5 1.7271(16) . ?
Cl6 C6 1.7251(17) . ?
Cl7 C7 1.7253(16) . ?
O2 C2 1.209(2) . ?
O9 C9 1.213(2) . ?
N1 C9 1.370(2) . ?
N1 C2 1.388(2) . ?
N1 H1 0.975(5) . ?
C2 C3 1.536(2) . ?
C3 C4 1.505(2) . ?
C3 C8 1.547(2) . ?
C3 H3 1.0000 . ?
C4 C5 1.334(2) . ?
C5 C6 1.486(2) . ?
C6 C7 1.346(2) . ?
C7 C8 1.518(2) . ?
C8 C9 1.544(2) . ?
C8 H8 1.0000 . ?

loop_
 _geom_angle_atom_site_label_1
 _geom_angle_atom_site_label_2
 _geom_angle_atom_site_label_3
 _geom_angle
 _geom_angle_site_symmetry_1
 _geom_angle_site_symmetry_3
 _geom_angle_publ_flag
C9 N1 C2 113.80(13) . . ?
C9 N1 H1 124.5(15) . . ?
C2 N1 H1 121.3(15) . . ?
O2 C2 N1 125.27(16) . . ?
O2 C2 C3 127.58(15) . . ?
N1 C2 C3 107.16(13) . . ?
C4 C3 C2 111.13(13) . . ?
C4 C3 C8 115.95(14) . . ?
C2 C3 C8 104.04(13) . . ?
C4 C3 H3 108.5 . . ?
C2 C3 H3 108.5 . . ?
C8 C3 H3 108.5 . . ?
C5 C4 C3 121.79(15) . . ?
C5 C4 Cl4 122.81(12) . . ?
C3 C4 Cl4 115.22(12) . . ?
C4 C5 C6 120.31(14) . . ?
C4 C5 Cl5 121.54(13) . . ?
C6 C5 Cl5 118.15(12) . . ?
C7 C6 C5 120.98(15) . . ?
C7 C6 Cl6 120.81(13) . . ?
C5 C6 Cl6 118.18(12) . . ?
C6 C7 C8 123.04(15) . . ?
C6 C7 Cl7 121.22(13) . . ?
C8 C7 Cl7 115.72(11) . . ?
C7 C8 C9 109.88(14) . . ?
C7 C8 C3 112.66(13) . . ?
C9 C8 C3 102.12(13) . . ?
C7 C8 H8 110.6 . . ?
C9 C8 H8 110.6 . . ?
C3 C8 H8 110.6 . . ?
O9 C9 N1 126.14(15) . . ?
O9 C9 C8 125.82(15) . . ?
N1 C9 C8 108.04(13) . . ?

loop_
 _geom_torsion_atom_site_label_1
 _geom_torsion_atom_site_label_2
 _geom_torsion_atom_site_label_3
 _geom_torsion_atom_site_label_4
 _geom_torsion
 _geom_torsion_site_symmetry_1
 _geom_torsion_site_symmetry_2
 _geom_torsion_site_symmetry_3
 _geom_torsion_site_symmetry_4
 _geom_torsion_publ_flag
C9 N1 C2 O2 176.32(17) . . . . ?
C9 N1 C2 C3 -3.69(19) . . . . ?
O2 C2 C3 C4 -38.3(2) . . . . ?
N1 C2 C3 C4 141.67(14) . . . . ?
O2 C2 C3 C8 -163.81(17) . . . . ?
N1 C2 C3 C8 16.20(17) . . . . ?
C2 C3 C4 C5 -95.40(18) . . . . ?
C8 C3 C4 C5 23.1(2) . . . . ?
C2 C3 C4 Cl4 79.87(16) . . . . ?
C8 C3 C4 Cl4 -161.62(12) . . . . ?
C3 C4 C5 C6 -5.9(2) . . . . ?
Cl4 C4 C5 C6 179.17(12) . . . . ?
C3 C4 C5 Cl5 174.55(12) . . . . ?
Cl4 C4 C5 Cl5 -0.4(2) . . . . ?
C4 C5 C6 C7 -8.0(2) . . . . ?
Cl5 C5 C6 C7 171.59(13) . . . . ?
C4 C5 C6 Cl6 174.14(13) . . . . ?
Cl5 C5 C6 Cl6 -6.31(18) . . . . ?
C5 C6 C7 C8 3.0(2) . . . . ?
Cl6 C6 C7 C8 -179.14(12) . . . . ?
C5 C6 C7 Cl7 -175.04(12) . . . . ?
Cl6 C6 C7 Cl7 2.8(2) . . . . ?
C6 C7 C8 C9 126.97(17) . . . . ?
Cl7 C7 C8 C9 -54.87(16) . . . . ?
C6 C7 C8 C3 13.8(2) . . . . ?
Cl7 C7 C8 C3 -168.01(11) . . . . ?
C4 C3 C8 C7 -25.6(2) . . . . ?
C2 C3 C8 C7 96.73(15) . . . . ?
C4 C3 C8 C9 -143.42(14) . . . . ?
C2 C3 C8 C9 -21.08(16) . . . . ?
C2 N1 C9 O9 169.82(17) . . . . ?
C2 N1 C9 C8 -10.72(19) . . . . ?
C7 C8 C9 O9 79.6(2) . . . . ?
C3 C8 C9 O9 -160.59(17) . . . . ?
C7 C8 C9 N1 -99.84(15) . . . . ?
C3 C8 C9 N1 19.94(17) . . . . ?

loop_
_geom_hbond_atom_site_label_D
_geom_hbond_atom_site_label_H
_geom_hbond_atom_site_label_A
_geom_hbond_site_symmetry_D
_geom_hbond_site_symmetry_H
_geom_hbond_site_symmetry_A
_geom_hbond_distance_DA
_geom_hbond_distance_DH
_geom_hbond_distance_HA
_geom_hbond_angle_DHA
_geom_hbond_publ_flag
N1 H1 O9 . . 2_545 2.8576(18) 0.975(16) 1.897(18) 168(2) no

#==============================================================================
# Additional structures and associated data_? identifiers
# should be added at this point if there is more than one 
# structure analysis in the CIF.

_shelx_res_file
;
TITL DSAA11
    shelxl.res
    created by SHELXL-2018/3 at 18:51:52 on 20-Aug-2020
CELL  0.71073 6.44390 5.86900 26.82760 90.00000 95.69600 90.00000
ZERR  4 0.00040 0.00030 0.00190 0.00000 0.00600 0.00000
LATT 1
SYMM    -X, .50+Y, .50-Z
SFAC C H CL N O
UNIT 32 12 16 4 8
OMIT     0   0   2
L.S. 20
FMAP 2
PLAN 5
WPDB -2
HTAB
BOND $H
CONF
LIST 4
TEMP -180.0
ACTA
SIZE 0.100 0.100 0.020
DFIX 0.9800 0.0050 N1 H1
WGHT    0.065800    0.265900
FVAR       0.55864
CL4   3    0.834332    0.249697    0.353770    11.00000    0.01608    0.02541 =
         0.02345    0.00369    0.00542    0.00983
CL5   3    0.632923    0.121048    0.453173    11.00000    0.02042    0.01728 =
         0.02023    0.00476    0.00243    0.00768
CL6   3    0.223718    0.362158    0.477716    11.00000    0.02032    0.01946 =
         0.01982    0.00383    0.00718    0.00495
CL7   3    0.062859    0.795700    0.418262    11.00000    0.02246    0.02266 =
         0.02012    0.00162    0.00509    0.01270
O2    5    0.417429    0.251388    0.271417    11.00000    0.03085    0.02038 =
         0.02363   -0.00635    0.00200    0.00412
O9    5    0.070920    0.905712    0.303314    11.00000    0.02397    0.02822 =
         0.01937    0.00113   -0.00105    0.01236
N1    4    0.204272    0.562286    0.279708    11.00000    0.01432    0.02065 =
         0.01662   -0.00128   -0.00027    0.00011
C2    1    0.380505    0.429471    0.291438    11.00000    0.01694    0.01748 =
         0.01616    0.00059    0.00416    0.00100
C3    1    0.514980    0.551425    0.333781    11.00000    0.01198    0.01622 =
         0.01745    0.00116    0.00218    0.00185
AFIX  13
H3    2    0.627782    0.637126    0.318834    11.00000   -1.20000
AFIX   0
C4    1    0.614856    0.383458    0.371182    11.00000    0.01159    0.01560 =
         0.01987   -0.00133    0.00098    0.00406
C5    1    0.529324    0.331000    0.412997    11.00000    0.01453    0.01263 =
         0.01768    0.00055   -0.00083    0.00371
C6    1    0.341425    0.454718    0.426361    11.00000    0.01510    0.01542 =
         0.01563   -0.00036    0.00262    0.00088
C7    1    0.268782    0.638508    0.400131    11.00000    0.01333    0.01560 =
         0.01759   -0.00260    0.00119    0.00402
C8    1    0.364323    0.725473    0.354269    11.00000    0.01401    0.01268 =
         0.01723   -0.00037   -0.00033    0.00265
AFIX  13
H8    2    0.436206    0.874500    0.361581    11.00000   -1.20000
AFIX   0
C9    1    0.193688    0.749333    0.309916    11.00000    0.01279    0.01952 =
         0.01642    0.00268    0.00232    0.00209
H1    2    0.108202    0.531251    0.250062    11.00000    0.03686
HKLF 4


REM  DSAA11
REM wR2 = 0.0862, GooF = S = 1.006, Restrained GooF = 1.006 for all data
REM R1 = 0.0303 for 1972 Fo > 4sig(Fo) and 0.0324 for all 2148 data
REM 140 parameters refined using 1 restraints

END

WGHT      0.0585      0.2906

REM Instructions for potential hydrogen bonds
EQIV $1 -x+1, y+1/2, -z+1/2
HTAB C3 O2_$1
EQIV $2 -x, y-1/2, -z+1/2
HTAB N1 O9_$2

REM Highest difference peak  0.576,  deepest hole -0.276,  1-sigma level  0.090
Q1    1   0.5914  0.2243  0.4299  11.00000  0.05    0.58
Q2    1   0.2784  0.7397  0.3379  11.00000  0.05    0.48
Q3    1   0.2805  0.3962  0.4491  11.00000  0.05    0.46
Q4    1   0.0546  0.7847  0.4508  11.00000  0.05    0.46
Q5    1   0.4463  0.6393  0.3470  11.00000  0.05    0.43
;

_shelx_res_checksum   48163

_shelx_hkl_file
;
   0   0  -2   -0.07    0.05
   0   0  -3    0.01    0.40
   0   0   3    0.02    0.22
   0   0  -3    0.03    0.15
   0   0   3    0.01    0.29
   0   0  -4  208.91    2.15
   0   0  -4  246.66    2.87
   0   0   4  284.19    3.17
   1   0   0  381.18    3.67
   1   0   0  353.57    2.46
   1   0  -1   -0.05    0.40
   1   0  -1    0.35    0.30
   1   0   1    0.39    0.32
  -1   0  -1    0.32    0.63
   1   0   1   -0.03    0.50
  -1   0  -1    0.07    0.43
   1   0   1   -0.32    0.57
   1   0  -2  380.74    2.59
   1   0  -2  380.74    2.47
   0  -1   0   -0.17    0.38
   0   1   0    0.47    0.46
   0  -1   0    0.38    0.31
   0  -1   0    0.01    0.28
   0   1   1  620.32    4.44
   0  -1   1  597.08    3.51
   0  -1  -1  128.02    2.10
   0  -1  -1  615.99    3.81
   0   1  -1  611.52    4.34
   0  -1   1  633.56    4.12
  -1   0  -2  300.98    3.71
   1   0   2  313.97    3.81
   1   0   2  299.52    2.51
   1   0  -3    0.17    0.32
   1   0  -3    0.03    0.45
   1   0  -3    0.17    0.37
   0  -1  -2  141.79    2.25
   0  -1   2  133.79    1.69
   0  -1   2  127.80    1.52
   0  -1  -2  127.76    1.81
   0   1  -2  135.17    2.12
   0  -1   2  140.61    2.03
   0   1   2  136.72    2.17
   0   0  -5    0.11    0.66
   0   0  -5   -0.16    0.41
   0   0   5   -0.18    0.58
   0   0  -5   -0.01    0.49
   0   0   5    0.49    0.50
  -1   0  -3   -0.14    0.78
   1   0   3    0.18    0.42
   1   0   3    0.14    0.86
   1   0   3   -0.05    0.62
  -1   0  -3    0.05    0.78
   1   0   3    0.35    0.43
   0   1  -3  321.55    3.32
   0  -1   3  324.27    3.08
   0   1  -3  331.32    3.15
   0  -1  -3  318.57    3.03
   0  -1  -3  303.74    2.53
   0  -1   3  301.20    2.76
   0  -1  -3  320.58    3.41
   1   0  -4   51.75    1.27
  -1   0   4   50.27    1.39
   1   0  -4   50.66    1.38
   0   0  -6   37.34    1.35
   0   0  -6   24.94    1.04
   0   0   6   25.27    0.99
   0   0  -6   31.16    1.52
   0   0   6   32.29    1.46
   0   0   6   35.23    1.42
   1   0   4  181.81    2.31
  -1   0  -4  177.06    3.19
   1   0   4  175.46    3.26
   0   1  -4  265.39    3.07
   0  -1   4  266.55    2.90
   0   1  -4  266.80    2.95
   0  -1  -4  270.26    3.09
   0  -1  -4  273.52    3.21
   0  -1  -4  244.66    2.68
   0  -1   4  251.14    2.92
  -1  -1   0 3956.40   12.32
   1   1   0 3938.22   13.31
  -1  -1   0 3850.34   13.12
  -1   1   0 4017.30   13.49
   1   1   0 4020.14   10.79
   1  -1   0 3910.88   12.91
   1  -1   0 3930.62   11.39
   1   1   0 4012.88   12.46
   1   1  -1 1411.25    6.52
   1   1  -1 1364.38    7.39
  -1  -1   1 1397.14    7.37
   1  -1  -1 1379.37    6.50
   1  -1  -1 1360.23    7.37
   1   1  -1 1421.01    7.35
   1   0  -5    0.19    0.57
   1   0  -5   -0.09    0.54
  -1   0   5    0.24    0.62
  -1  -1  -1  102.47    2.35
   1  -1   1   95.58    1.53
   1   1   1  100.49    2.34
   1   1   1  107.82    2.25
  -1  -1  -1   91.17    2.02
   1  -1   1   96.55    2.23
  -1   1  -1   97.20    2.23
   1  -1   1   95.07    2.06
  -1  -1  -1   98.20    2.02
   1  -1  -2  311.35    3.43
  -1  -1   2  317.41    3.54
   1   1  -2  321.51    3.56
   1   1  -2  304.41    3.56
   1   1  -2  324.62    3.26
  -1  -1  -2 2308.76    9.87
   1   1   2 2386.09   11.17
  -1   1  -2 2311.53    7.53
  -1   1  -2 2350.94   10.97
   1  -1   2 2334.29    7.35
  -1  -1  -2 2371.81   10.06
  -1  -1  -2 2330.02   10.74
   1  -1   2 2337.14   11.20
   1  -1   2 2290.41   10.06
   1   1   2 2344.87    9.71
   1   1  -3  553.78    4.40
  -1  -1   3  624.37    4.91
   1  -1  -3  569.55    3.82
   1   1  -3  620.49    4.97
   1   1  -3  594.83    4.46
   1  -1  -3  604.98    4.67
   0  -1  -5   99.48    2.04
   0  -1   5  100.64    1.88
   0   1   5   94.57    1.94
   0  -1  -5  101.25    2.99
   0  -1  -5  105.07    2.11
   0   1  -5  104.10    1.95
   0  -1   5   95.72    2.11
   0   1  -5  104.48    2.01
   0  -1  -5  102.86    2.09
  -1   0  -5   -0.06    1.01
   1   0   5    0.20    0.55
   1   0   5    0.10    1.14
  -1   0  -5    0.44    0.49
  -1   0  -5    0.09    0.84
  -1   0   6 2594.28   10.23
  -1   0   6 2567.79   12.66
   0   0  -7    0.00    0.61
   0   0   7   -0.02    0.48
   0   0  -7   -0.02    0.88
   0   0   7    0.05    0.60
   0   0  -7    0.08    0.64
   0   0   7   -0.04    0.87
  -1  -1  -3 3300.51   13.47
   1   1   3 3360.72   11.90
  -1  -1  -3 3271.53   12.02
   1   1   3 3311.35   13.64
   1  -1   3 3223.36    8.96
  -1  -1  -3 3275.52   12.47
  -1   1  -3 3277.90   13.55
   1  -1   3 3413.61   13.55
  -1   1  -3 3250.79    9.16
   1  -1   3 3238.08   12.67
  -1  -1   4  715.45    5.18
   1  -1  -4  706.30    4.49
   1   1  -4  731.32    5.10
   1   1  -4  680.72    4.80
  -1   1   4  692.61    4.58
  -1  -1   4  696.45    4.98
  -1  -1   4  716.35    5.25
  -1  -1   4  649.50    5.06
   1   1  -4  744.16    5.53
   1  -1  -4  713.77    4.84
  -1   1   4  646.95    4.76
   0  -1  -6  277.92    3.53
   0  -1  -6  249.65    3.48
   0  -1   6  246.52    3.05
   0   1  -6  280.28    3.38
   0   1   6  247.05    3.35
   0  -1   6  267.93    3.27
   0  -1  -6  266.45    3.64
   0  -1   6  236.21    3.52
   0   1   6  268.06    3.47
   0  -1  -6  250.26    4.60
   1   1   4 9949.72   24.53
  -1  -1  -4 9821.61   22.00
   1  -1   4 9909.22   23.71
   1  -1   4 9712.09   23.33
   1  -1   4 9852.54   15.95
   1   1   4 9999.00   21.17
  -1   1  -4 9758.39   16.52
  -1  -1  -4 9936.14   24.34
  -1  -1  -4 9937.63   22.79
   1   0   6 3017.43   14.60
  -1   0  -6 2989.96   14.54
  -1   1   5 1911.29    8.07
  -1  -1   5 1889.34    8.08
   1  -1  -5 1883.78    7.86
   1   1  -5 1851.96    7.61
  -1   1   5 1946.56    8.27
   1   1  -5 2026.23    9.17
  -1  -1   5 1930.84    8.94
   1  -1  -5 1770.52   11.72
   1  -1  -5 1915.82    7.78
  -1  -1   5 1867.20    9.01
   1   1  -5 2065.85    9.23
   1   0  -7    0.44    0.64
  -1   0   7   -0.46    0.77
  -1   0   7    0.27    0.79
   1   0  -7   -0.25    0.68
   0   0  -8  687.03    6.99
   0   0   8  685.84    6.41
   0   0  -8  514.70    4.58
   0   0   8  549.21    4.46
   0   0   8  622.72    6.34
  -1  -1  -5 2272.59   11.90
   1  -1   5 2194.23    8.08
  -1  -1  -5 2219.34   11.35
   1  -1   5 2205.94   11.67
   1   1   5 2293.00   10.80
  -1   1  -5 2120.59    7.81
  -1  -1  -5 2285.74   10.90
   2   0  -1    0.29    0.46
   2   0  -1    0.18    1.02
   2   0  -1   -0.03    0.71
  -2   0   1    0.11    0.37
  -2   0   1    0.13    0.31
   2   0  -1    0.23    0.25
   1   1  -6 1888.05    7.61
   1  -1  -6 1892.98    8.51
   1   1  -6 2041.24    9.37
   1  -1  -6 1984.52   12.00
  -1  -1   6 1924.52    9.19
  -1  -1   6 1973.44    9.47
  -1   1   6 1962.06    8.22
  -1   1   6 1907.38    8.40
  -1  -1   6 1884.53    7.72
   1  -1  -6 1971.90    7.91
   2   0   0  394.71    5.33
   2   0   0  403.62    3.81
   2   0   0  404.87    5.32
  -2   0   0  409.02    3.86
   0  -1   7  200.07    3.02
   0   1   7  187.62    3.19
   0  -1  -7  186.76    3.31
   0  -1   7  196.48    2.86
   0   1  -7  203.51    2.97
   0  -1  -7  200.45    3.07
   0   1   7  202.94    3.13
   0  -1   7  188.40    3.43
  -2   0   2 1291.74    6.21
   2   0  -2 1280.84    8.68
  -2   0   2 1261.22    6.60
   2   0  -2 1241.12    6.59
   2   0  -2 1221.21    4.86
  -2   0  -1    0.16    0.42
   2   0   1   -0.02    0.43
   2   0   1   -0.21    0.73
  -2   0  -1    0.23    0.87
   2   0   1    0.19    1.10
   1   0   7    0.34    1.19
  -1   0  -7   -0.40    0.62
   1   0   7   -0.32    0.73
  -1   0  -7    0.31    1.01
  -1   0  -7   -0.28    1.10
   2   0  -3    0.29    0.40
  -2   0   3   -0.06    0.76
   2   0  -3   -0.10    0.64
  -2   0   3    0.08    0.52
   2   0  -3   -0.02    0.48
   1   0  -8 2104.36   10.75
  -1   0   8 2089.99   12.78
   2   0   2   50.93    2.36
  -2   0  -2   45.83    2.16
  -2   0  -2   50.62    1.50
   2   0   2   50.37    2.17
   2   0   2   48.04    1.40
   2   0  -4 5730.36   14.53
   2   0  -4 5757.64   13.38
  -2   0   4 5781.63   16.70
   1  -1   6 1882.76   11.38
   1   1   6 1824.93   11.19
  -1  -1  -6 1967.98   11.35
  -1   1  -6 1838.44    7.85
  -1  -1  -6 1885.80   10.26
   1  -1   6 1819.84    7.72
  -1  -1  -6 1863.13   11.00
   1   1   6 1963.65   10.53
   0   0   9    0.03    0.72
   0   0  -9   -0.26    0.78
   0   0   9   -0.26    0.54
   0   0   9   -0.07    1.02
   0   0  -9    0.06    0.96
   1  -1  -7   81.18    2.04
   1   1  -7   87.73    2.10
  -1   1   7   79.29    1.93
   1  -1  -7   86.25    1.73
   1   1  -7   78.04    1.57
  -1  -1   7   86.57    2.26
  -1   1   7   84.62    1.75
  -1  -1   7   87.15    2.11
   0  -2   0 3279.10   14.28
   0   2   0 3264.10   14.37
   0  -2   0 3265.12   11.96
   0  -2   0 3293.53   13.30
  -2   0  -3    0.25    0.97
   2   0   3    0.13    1.19
  -2   0  -3    0.06    0.41
   2   0   3    0.59    0.47
   2   0   3   -0.08    0.76
  -2   0  -3   -0.12    1.13
   0   2   1  183.35    3.44
   0   2   1  179.30    2.95
   0  -2   1  167.01    1.52
   0  -2   1  187.97    2.80
   0  -2  -1  176.76    2.86
   0   2  -1  166.50    1.80
   0  -2   1  191.69    3.26
   0  -2  -1  201.43    3.72
   0   2  -1  183.89    3.43
   0  -2   1  194.60    3.59
   0   2  -1  197.90    3.14
   0   1   8 3186.45   18.83
   0  -1  -8 3232.24   14.49
   0  -1   8 3638.04   12.31
   0  -1  -8 3781.55   17.93
   0  -1  -8 3683.15   13.29
   0  -1   8 3409.47   14.84
   0   1  -8 3774.62   12.86
   0  -1   8 3602.15   13.35
   0   1   8 3545.35   14.24
   0   1   8 3585.98   13.17
   2   0  -5    0.04    0.68
   2   0  -5    0.55    0.74
  -2   0   5   -0.04    0.77
  -2   0   5    0.02    0.71
   2   0  -5    0.42    0.50
   2   0  -5    0.15    0.56
   0  -2  -2   26.04    1.21
   0  -2   2   28.14    1.17
   0  -2   2   27.91    0.84
   0   2  -2   30.09    1.38
   0   2  -2   27.27    1.06
   0   2  -2   27.87    1.24
   0  -2  -2   29.26    1.61
   0   2   2   27.91    1.46
   0   2   2   26.87    1.25
   0  -2   2   29.57    1.37
   0  -2   2   26.96    1.50
   0   2  -2   28.57    1.48
   1   0   8 3337.77   16.25
  -1   0  -8 3340.88   16.30
   1   0   8 3138.31   15.73
  -1   0  -8 3374.03   16.77
  -1   0  -8 3216.23   12.71
   2   1  -1   83.65    2.56
   2   1  -1   81.57    1.74
   2  -1  -1   81.36    2.51
   2   1  -1   86.22    2.30
  -2  -1   1   82.18    1.75
   2  -1  -1   80.28    2.43
   2   1   0  913.79    8.01
   2  -1   0  921.41    8.02
   2   1   0  932.07    5.62
   2  -1   0  899.29    7.83
  -2  -1   0  953.10    5.87
   2   1   0  941.53    7.30
   2  -1  -2  487.67    5.58
   2   1  -2  500.93    4.37
  -2  -1   2  446.77    5.24
   2  -1  -2  473.07    5.48
  -2  -1   2  489.48    4.32
   2   1  -2  490.70    5.22
   2  -1  -2  444.12    2.62
   2   1  -2  485.71    5.57
   1   0  -9    0.34    0.80
  -1   0   9   -0.02    0.88
  -1   0   9   -0.41    0.79
   1   0  -9   -0.14    0.73
   0  -2   3   89.57    2.22
   0   2  -3   80.92    1.84
   0  -2  -3   97.75    2.69
   0   2  -3   92.53    2.12
   0  -2   3   85.95    1.94
   0   2  -3   89.80    2.28
   0   2  -3   90.55    2.50
   0   2   3   89.24    2.17
   0  -2  -3   98.92    2.31
   0  -2   3   94.05    1.61
  -2   0  -4  719.92    7.96
   2   0   4  734.79    8.18
   2   0   4  716.80    8.01
   2   0   4  730.12    5.62
  -2  -1  -1 1453.86    7.19
   2  -1   1 1447.53   10.48
   2   1   1 1432.50   10.63
   2  -1   1 1443.28    5.36
   1   1   7  894.84    8.12
   1  -1   7  883.68    5.86
  -1  -1  -7  910.61    8.12
  -1   1  -7  888.94    5.70
   1  -1   7  909.54    8.26
  -1  -1  -7  932.48    8.20
  -1  -1  -7  921.14    7.46
  -2  -1   3   34.93    1.24
   2   1  -3   34.93    1.29
  -2  -1   3   31.66    1.55
   2   1  -3   33.11    1.60
   2  -1  -3   35.18    1.65
   2   1  -3   33.96    1.53
   1   1  -8 5043.26   15.78
  -1   1   8 4765.64   15.23
  -1  -1   8 4948.79   16.56
  -1   1   8 4941.90   12.80
   1  -1  -8 4871.51   16.15
   1  -1  -8 4903.03   20.78
  -1  -1   8 5019.72   16.77
   1   1  -8 4908.26   12.18
   1  -1  -8 4969.99   12.64
  -1   1   8 4772.71   23.53
   2   0  -6 8201.22   19.13
  -2   0   6 7998.17   24.57
   2   0  -6 8120.28   22.58
   2   0  -6 8309.30   17.64
  -2  -1  -2 3990.25   18.11
   2   1   2 4024.84   15.05
   2   1   2 4051.53   18.15
  -2  -1  -2 3958.64   17.30
  -2  -1  -2 3984.95   11.90
   2  -1   2 3910.57   17.04
  -2   1  -2 3810.70    8.63
   2  -1   2 3852.60   17.42
   2  -1   2 4018.79    8.67
   0  -2   4 1098.61    7.80
   0  -2   4 1059.03    5.79
   0   2  -4  993.98    6.84
   0   2  -4 1099.95    7.16
   0  -2  -4 1006.97    5.19
   0  -2  -4 1114.86    8.50
   0   2  -4 1069.27    8.22
   0  -2  -4 1021.39    7.12
   0   2   4 1048.61    7.36
   2   1  -4   51.98    1.82
   2  -1  -4   56.75    1.87
   2   1  -4   52.59    1.55
   2   1  -4   52.91    1.85
  -2  -1   4   50.83    1.54
  -2  -1   4   50.21    1.82
   2  -1  -4   59.30    2.04
   0   0  10  141.89    3.41
   0   0  10  125.08    3.25
   0   0  10  121.69    2.46
   0   0 -10  142.45    3.68
   1   2   0  694.49    7.10
  -1   2   0  704.82    7.11
  -1  -2   0  718.01    6.52
   1  -2   0  666.25    4.04
   1   2   0  719.97    5.68
   1  -2   0  681.05    6.83
   1  -2   0  677.60    4.61
   1  -2   0  677.82    5.75
   1  -2  -1 3236.18   14.51
   1   2  -1 3351.95   13.37
  -1  -2   1 3292.35   13.91
   1  -2  -1 3165.52    9.32
   1   2  -1 3259.56   10.75
   1  -2  -1 3119.14    9.80
   1   2  -1 3321.92   14.95
   0  -1  -9 1000.52    9.73
   0   1   9  874.09    9.74
   0   1   9 1088.95    7.39
   0  -1   9 1067.41    6.98
   0  -1   9 1113.82    8.01
   0   1   9  941.81    7.75
   0  -1  -9  959.65    8.41
   0  -1   9 1005.23    8.44
   0  -1  -9 1000.37    7.38
   1  -2   1  983.10    6.92
  -1  -2  -1  930.49    8.10
   1  -2   1  963.87    8.28
   1  -2   1  992.19    4.78
   1   2   1 1000.26    6.78
  -1   2  -1  979.77    8.39
  -1   2  -1 1013.86    6.20
   1   2   1  978.09    8.63
   1  -2   1  950.42    5.91
  -1  -2  -1  982.26    7.72
   1   2  -2  777.62    7.14
  -1   2   2  801.79    5.04
   1  -2  -2  793.86    4.05
   1   2  -2  860.60    7.03
   1   2  -2  809.90    5.44
  -1  -2   2  771.33    6.83
  -1  -2   2  838.97    7.03
   1  -2  -2  809.36    5.03
   1  -2  -2  797.02    7.15
   1  -2  -2  808.57    4.61
   2   0   5    0.10    0.59
   2   0   5    0.07    1.27
  -2   0  -5    0.10    1.15
   2   0   5   -0.07    0.81
  -2   0  -5    0.24    0.49
  -2   0  -5    0.11    1.10
  -2   1  -3  932.62    4.50
   2  -1   3  960.93    8.76
  -2  -1  -3 1047.92    9.47
   2  -1   3  906.97    8.73
  -2  -1  -3  938.24    8.66
   2   1   3  968.85    7.59
   2  -1   3  957.01    4.25
   2   1   3 1000.24    9.30
  -1   2  -2   89.95    2.67
  -1  -2  -2   83.37    2.31
   1   2   2   86.36    2.22
   1  -2   2   88.24    2.12
  -1  -2  -2   91.89    2.74
   1   2   2   88.07    2.64
  -1   2  -2   88.90    2.16
   1  -2   2   85.66    2.66
   1  -2   2   84.24    2.00
   1   0   9   -0.06    0.72
  -1   0  -9   -0.53    1.29
  -1   0  -9   -0.11    0.69
   1   0   9   -0.06    0.92
   1   0   9   -0.02    1.29
  -1   0  -9    0.29    1.16
   1  -2  -3 3004.23    7.63
   1  -2  -3 3101.26   10.05
   1   2  -3 3087.17   10.98
  -1  -2   3 3274.45   14.36
   1  -2  -3 3147.42   14.07
  -1   2   3 3059.46   10.70
  -1  -2   3 3248.47   13.48
   1   2  -3 3203.44   13.44
   1   2  -3 3069.99   14.06
  -2  -1   5  159.34    2.96
   2   1  -5  170.92    3.21
   2  -1  -5  157.81    2.96
   2   1  -5  161.76    2.92
   2  -1  -5  175.80    3.02
  -2  -1   5  171.23    2.85
   2   1  -5  172.05    2.80
   2   0  -7    0.09    0.71
  -2   0   7   -0.09    0.82
   2   0  -7   -0.09    0.67
   2   0  -7    0.17    0.54
   0   2  -5    0.40    0.55
   0   2  -5    0.14    0.83
   0   2   5    0.62    0.61
   0  -2  -5    0.41    0.52
   0  -2  -5    0.29    0.69
   0  -2  -5    0.82    0.90
   0  -2   5    0.38    0.69
   0  -2   5    0.13    0.47
   0   2  -5    0.24    0.65
   1  -1   8 1664.11    8.72
  -1  -1  -8 1629.89   11.26
  -1   1  -8 1612.52    8.13
  -1  -1  -8 1663.91   11.52
  -1  -1  -8 1686.94   10.74
   1  -1   8 1634.44   10.68
   1  -1   8 1699.65   11.86
   1   1   8 1652.03   11.59
   1   0 -10  338.18    4.99
  -1   0  10  331.65    4.63
  -1  -2  -3  575.69    6.17
   1  -2   3  556.53    6.46
   1   2   3  554.93    5.40
   1   2   3  581.10    6.76
  -1   2  -3  567.99    4.16
   1  -2   3  559.97    5.21
  -1   2  -3  576.46    6.80
   1  -2   3  577.56    5.37
  -1  -2  -3  574.24    6.76
  -1  -2  -3  567.16    5.21
  -1   2  -3  590.14    5.69
  -1   1   9  477.59    7.90
   1  -1  -9  451.89    4.01
   1   1  -9  471.49    5.26
  -1  -1   9  424.62    5.17
   1  -1  -9  409.68    5.04
   1  -1  -9  511.35    7.09
  -1   1   9  437.56    3.90
  -1   1   9  410.00    4.78
   1   1  -9  445.75    3.70
  -1  -1   9  491.90    5.87
   2   1   4  899.70    9.15
   2  -1   4  888.15    4.30
   2  -1   4  867.53    8.69
  -2  -1  -4  907.95    9.08
  -2  -1  -4  859.73    8.54
   2  -1   4  902.90    8.80
   2   1   4  905.80    7.44
  -2   1  -4  905.12    5.05
   1   2  -4 1547.39    9.69
  -1  -2   4 1664.27    9.78
   1  -2  -4 1595.67    7.67
   1   2  -4 1665.30    9.82
   1  -2  -4 1583.58    6.03
  -1  -2   4 1506.96    9.79
  -1  -2   4 1672.91    8.42
   1   2  -4 1623.28    8.56
   1  -2  -4 1587.98    9.87
  -1   2   4 1472.96   10.11
  -1  -2   4 1629.63   10.06
  -2   0  -6  192.22    4.41
   2   0   6  190.19    4.52
  -2   0  -6  196.07    3.26
  -2   1   6   10.22    0.95
  -2  -1   6    7.77    0.76
  -2  -1   6    6.68    0.88
   2  -1  -6    8.62    0.87
   2   1  -6    8.36    0.83
   2  -1  -6    7.86    0.96
   2   1  -6    7.64    0.91
   2  -1  -6    7.11    1.08
   2   1  -6    8.36    0.87
  -2   1   6    8.31    1.29
   0  -2  -6    2.27    1.00
   0  -2  -6    2.71    0.82
   0  -2   6    2.68    0.60
   0   2   6    0.25    0.55
   0  -2   6    1.93    0.82
   0  -2  -6    2.66    0.63
   0   2  -6    2.86    0.62
   0  -2   6    1.94    0.80
   0   2  -6    2.09    0.73
   0   2   6    2.94    0.75
   0   2  -6    2.37    0.95
   1  -2   4  223.78    3.58
   1   2   4  235.47    4.50
   1   2   4  225.42    3.67
  -1   2  -4  224.91    2.71
  -1  -2  -4  237.10    4.46
  -1   2  -4  236.19    4.04
   1  -2   4  221.86    4.16
  -1   2  -4  241.52    4.49
  -1  -2  -4  224.43    3.47
  -1  -2  -4  232.13    4.06
   1  -2   4  229.17    3.42
  -1   2  -4  234.41    3.56
   2   0  -8  538.99    3.85
  -2   0   8  560.73    6.18
   2   0  -8  541.90    6.00
   2   0  -8  558.98    5.63
   0   1  10 3771.38   16.32
   0   1  10 3988.24   22.93
   0  -1  10 3979.64   13.86
   0  -1  10 3923.25   15.44
   0   1  10 4119.15   14.72
   0  -1 -10 3751.50   17.53
   0  -1 -10 3908.13   14.91
   0  -1  10 3808.45   17.17
  -1  -2   5 2165.55   12.01
   1   2  -5 2176.32   11.62
  -1   2   5 2240.42   12.35
   1  -2  -5 2199.49    7.98
  -1  -2   5 2236.27   11.21
   1   2  -5 2229.12   10.62
   1   2  -5 2307.87   11.86
   1  -2  -5 2181.62   11.71
  -1  -2   5 2250.82   11.61
   1  -2  -5 2202.15    9.51
  -1  -2   5 2274.79   10.30
   0   0 -11   -0.05    0.80
   0   0  11    0.11    0.63
   0   0  11    0.05    0.77
   0   0 -11    0.81    1.09
   0   0  11   -0.28    1.14
  -2  -1  -5 1459.93   11.69
   2  -1   5 1451.90   11.57
   2   1   5 1412.06    9.29
   2  -1   5 1450.45    5.96
  -2   1  -5 1434.92    7.13
   2   1   5 1493.58   11.92
  -2  -1  -5 1413.44   11.16
   1   0  10 1709.10   12.35
   1   0  10 1548.28   11.38
  -1   0 -10 1667.88    9.94
   1   0  10 1850.60   13.47
  -1   0 -10 1733.96   13.27
  -1  -1  -9  102.22    3.20
   1   1   9   98.67    3.14
  -1  -1  -9  105.85    3.29
  -1   1  -9   98.61    2.14
  -1  -1  -9   96.92    3.02
  -1  -1  -9   99.32    2.80
   1  -1   9   97.37    2.25
   1  -1   9   98.21    3.20
   1   1   9   98.07    2.93
   2  -1  -7  921.55    7.29
   2  -1  -7  976.54    6.58
  -2  -1   7  953.27    6.66
   2   1  -7  976.72    7.71
   2  -1  -7 1002.66    8.91
  -2   1   7  976.25    6.94
  -2   1   7 1029.76   10.92
   2   1  -7  922.93    6.39
   2   1  -7  969.47    7.14
  -2  -1   7  972.42    7.48
  -1   2  -5  138.25    2.19
  -1  -2  -5  145.16    3.56
   1   2   5  133.38    3.54
  -1   2  -5  140.77    3.37
  -1  -2  -5  142.62    3.17
  -1  -2  -5  143.66    2.97
  -1   2  -5  137.74    2.73
   1   2   5  143.38    3.13
  -1   2  -5  146.92    3.54
   1  -2   5  144.35    2.79
   1  -2   5  143.90    3.23
  -1   0  11   -0.16    0.75
   1   0 -11   -0.19    0.83
   1   0 -11    0.10    0.72
  -1   0  11    0.01    0.93
   1  -1 -10 1529.93   12.07
   1  -1 -10 1523.50   10.47
  -1  -1  10 1578.99   10.33
   1   1 -10 1617.59    7.17
  -1  -1  10 1585.42   10.39
  -1   1  10 1531.25    9.67
  -1   1  10 1591.80    7.39
   1   1 -10 1628.73    9.78
  -1   1  10 1488.15   14.28
   1  -1 -10 1573.99    7.57
  -2   0  -7    0.30    0.44
   2   0   7    0.04    0.67
  -2   0  -7   -0.14    1.32
  -2   0  -7   -0.05    0.51
   2   0   7   -0.14    1.47
  -2   0  -7   -0.05    1.24
   1  -2  -6   72.05    1.88
   1  -2  -6   76.06    2.33
  -1   2   6   67.85    1.60
  -1   2   6   73.99    2.34
   1   2  -6   70.35    2.17
  -1  -2   6   78.96    2.34
  -1  -2   6   75.13    2.11
   1  -2  -6   72.52    1.67
   1   2  -6   76.43    2.25
   1   2  -6   70.35    2.12
  -1  -2   6   71.28    2.34
   0   2  -7   21.09    1.34
   0   2  -7   18.50    1.52
   0   2  -7   20.88    1.15
   0  -2   7   18.55    1.33
   0  -2  -7   21.61    1.51
   0  -2   7   20.15    1.31
   0   2   7   21.21    1.45
   0  -2  -7   19.92    1.21
   0  -2   7   20.84    1.24
   0   2   7   18.89    1.14
   0  -2  -7   20.59    1.29
   2   0  -9    0.07    0.70
   2   0  -9    0.09    0.30
  -2   0   9    0.18    0.78
  -2   0   9    0.23    0.96
   2   0  -9    0.11    0.28
   2   0  -9    0.12    0.73
  -2  -1  -6  173.09    4.17
   2   1   6  199.21    4.55
  -2  -1  -6  200.03    4.51
   2  -1   6  190.19    2.44
   2   1   6  200.10    3.77
   2  -1   6  191.56    4.57
  -2   1  -6  171.79    2.21
   2  -1  -8  686.19    7.62
   2   1  -8  694.06    5.24
   2  -1  -8  684.00    6.53
   2   1  -8  719.81    6.46
  -2  -1   8  713.48    6.81
   2   1  -8  704.58    6.57
  -2  -1   8  708.10    7.14
  -2  -1   8  662.30    5.38
   2  -1  -8  723.00    5.44
  -2   1   8  717.08    5.65
  -1  -2  -6  117.33    2.93
   1  -2   6  120.53    2.59
  -1   2  -6  123.37    3.35
  -1  -2  -6  111.48    3.26
  -1   2  -6  120.42    2.61
   1  -2   6  117.39    3.07
  -1  -2  -6  115.96    2.87
   1   2   6  121.30    3.06
  -1   2  -6  112.90    3.29
   0   1  11   60.73    3.16
   0  -1  11   49.71    1.77
   0  -1  11   48.41    2.33
   0   1  11   56.91    1.99
   0  -1 -11   47.22    1.88
   0  -1  11   49.88    1.91
   0   1  11   50.98    2.31
   0  -1 -11   51.79    2.48
  -1  -2   7  626.69    6.59
   1  -2  -7  585.26    5.02
  -1   2   7  595.81    6.39
   1  -2  -7  622.90    6.45
  -1  -2   7  596.80    6.28
   1   2  -7  633.67    6.49
   1   2  -7  573.03    6.18
   1  -2  -7  592.30    5.60
  -1   2   7  582.89    4.74
  -1  -2   7  610.47    5.81
   1   2  -7  573.59    5.88
   0   0  12   34.45    2.11
   0   0  12   34.59    1.54
   0   0 -12   36.93    2.27
   0   0  12   36.51    2.11
   1  -1  10   53.89    1.75
  -1  -1 -10   62.74    2.56
  -1  -1 -10   63.73    2.73
   1   1  10   56.94    2.39
  -1   1 -10   59.64    1.84
  -1  -1 -10   59.12    2.30
   1  -1  10   55.54    2.21
   1   1  10   62.81    2.75
  -1  -1 -10   57.59    2.47
   1  -1  10   58.70    2.75
  -2   0  -8 1371.73   12.49
  -2   0  -8  980.89    7.99
   2   0   8 1301.59    9.42
   2   0   8  962.45   10.21
  -2   0  -8  970.25    6.36
  -2   0  -8  978.45   10.47
   0  -2   8  237.47    3.92
   0   2   8  236.02    4.34
   0   2   8  211.98    3.40
   0  -2  -8  220.30    3.67
   0  -2  -8  226.80    3.88
   0   2  -8  210.36    4.40
   0   2  -8  218.65    3.95
   0  -2   8  213.47    3.86
   0  -2  -8  220.42    4.17
   0  -2   8  220.67    3.81
  -1   0 -11   -0.01    1.28
  -1   0 -11   -0.48    0.78
   1   0  11   -0.12    1.05
   1   0  11   -0.48    0.92
   1   0  11   -0.01    1.48
  -1   0 -11   -0.43    1.23
   1  -1 -11 1637.01   12.74
  -1  -1  11 1610.04   10.62
   1   1 -11 1662.27    7.42
  -1   1  11 1637.15   10.28
  -1   1  11 1748.41    7.81
   1  -1 -11 1721.87    8.24
  -1   1  11 1694.36   15.81
   1  -1 -11 1685.19   11.59
  -1  -1  11 1617.01   10.78
   1   1 -11 1789.58   10.65
  -2  -1  -7   54.59    2.56
   2  -1   7   51.85    2.68
   2   1   7   48.99    2.65
  -2  -1  -7   45.46    2.40
   2  -1   7   48.64    1.35
  -2   1  -7   48.68    1.29
   2   1   7   52.62    2.06
   1   0 -12  454.19    5.87
  -1   0  12  469.38    7.21
   2  -2  -1  317.32    4.66
  -2  -2   1  313.23    4.45
   2   2  -1  305.14    5.24
   2   2  -1  303.44    4.91
   2   2  -1  318.96    4.40
  -2  -2   1  284.70    5.09
   2   2  -1  308.74    4.93
  -2  -2   1  322.77    5.01
   2  -2  -1  290.26    4.93
  -2  -2   0    3.20    0.75
   2  -2   0    0.42    0.91
   2  -2   0    0.23    0.90
   2  -2   0    0.55    0.42
   2   2   0    1.99    0.94
  -2  -2   0    2.98    0.87
   2   2   0    0.08    1.15
   2   2   0    0.11    0.87
  -2  -2   2  453.27    6.00
   2   2  -2  433.96    5.90
   2   2  -2  418.01    6.03
   2  -2  -2  430.38    5.30
  -2  -2   2  385.24    5.70
  -2  -2   2  408.19    5.19
   2   2  -2  437.88    5.23
   2  -2  -2  396.58    5.73
  -2   2   2  386.78    5.94
  -2   0  10  518.30    7.24
   2   0 -10  513.41    6.40
  -3   0   1   -0.02    0.53
  -3   0   1    0.00    0.40
   3   0  -1    0.27    0.34
   3   0  -1    0.05    0.95
   3   0  -1    0.45    1.37
  -3   0   1   -0.09    1.14
   3   0  -1    0.53    0.66
   2  -2   1  391.52    6.01
  -2  -2  -1  414.09    5.09
   2   2   1  420.51    5.92
   2   2   1  471.59    6.35
   2   2   1  403.28    6.12
  -2  -2  -1  415.98    5.68
  -2   2  -1  450.76    5.89
   2  -2   1  408.88    4.37
   2  -2   1  407.80    5.53
   1  -2   7 1220.88    8.25
   1   2   7 1196.68    9.33
  -1   2  -7 1163.44   10.37
  -1  -2  -7 1214.64    9.32
  -1   2  -7 1190.66   10.10
  -1  -2  -7 1210.58    9.48
  -1   2  -7 1196.10    8.14
   1  -2   7 1183.54    9.67
   3   0  -2  672.63    3.97
  -3   0   2  698.42    5.22
   3   0  -2  656.23    5.83
   3   0  -2  676.82    8.10
  -3   0   2  695.76    6.00
  -3   0   0   56.60    1.81
   3   0   0   59.98    1.90
   3   0   0   52.37    2.71
   3   0   0   57.21    2.62
  -3   0   0   63.03    1.14
   2  -2  -3  101.03    2.94
  -2   2   3  104.07    3.11
   2  -2  -3   93.91    1.37
   2  -2  -3  110.47    2.81
   2   2  -3  105.22    2.93
   2   2  -3  101.27    2.94
  -2  -2   3  113.46    3.09
   2   2  -3  102.83    2.76
  -2  -2   3   98.19    3.01
  -2  -2   3  106.01    2.67
   2   2  -3  105.14    2.61
   2   1  -9 1820.77   10.32
  -2   1   9 1806.43   15.72
   2  -1  -9 1760.83    8.13
  -2  -1   9 1736.71   11.17
   2  -1  -9 1719.33   10.66
   2   1  -9 1775.90    8.07
   2   1  -9 1784.93   10.44
  -2  -1   9 1620.66   10.66
  -2   1   9 1803.69    8.67
   2  -1  -9 1790.27   12.84
  -2   1   9 1645.37   10.43
  -1  -2   8   74.30    2.33
  -1  -2   8   75.34    2.24
  -1  -2   8   76.62    2.36
   1  -2  -8   75.89    2.13
   1   2  -8   77.08    2.57
  -1   2   8   77.87    2.39
   1   2  -8   79.45    2.36
   1   2  -8   76.30    2.25
  -1   2   8   73.86    1.90
   1  -2  -8   82.24    2.48
   1  -2  -8   77.60    2.20
   1  -2  -8   73.94    3.36
  -3   0   3    0.44    0.60
   3   0  -3    0.23    0.39
   3   0  -3    0.14    0.60
  -3   0   3    0.06    1.06
   3   0  -3    0.02    0.92
  -3   0   3    0.05    0.47
   2   2   2   18.31    1.42
   2   2   2   17.64    1.71
  -2   2  -2   18.86    1.60
   2  -2   2   17.83    1.00
  -2   2  -2   19.40    1.59
   2  -2   2   17.53    1.60
   2  -2   2   18.27    1.65
  -2  -2  -2   18.91    1.22
   2   2   2   19.42    1.61
  -2  -2  -2   18.19    1.37
   3   0   1    0.55    1.00
   3   0   1    1.47    0.71
  -3   0  -1    1.25    1.22
   3   0   1   -0.09    1.38
  -3   0  -1    3.52    0.76
   2   2  -4  614.50    6.24
   2   2  -4  603.58    6.42
  -2  -2   4  631.67    6.96
   2   2  -4  569.60    6.50
   2  -2  -4  585.45    3.83
  -2   2   4  648.50    7.63
  -2  -2   4  591.64    6.26
  -2  -2   4  576.14    6.82
   2   2  -4  669.76    7.31
   2  -2  -4  619.52    5.65
   2  -2  -4  624.92    6.97
  -3   0   4  808.93    6.85
   3   0  -4  796.49    8.17
   0  -2   9  173.56    3.50
   0   2  -9  170.09    4.19
   0  -2   9  190.46    3.64
   0   2  -9  173.58    3.65
   0   2   9  170.21    3.30
   0   2   9  185.33    3.93
   0  -2  -9  177.68    3.57
   0  -2  -9  170.84    3.48
   0  -2  -9  174.33    3.85
   0  -2  -9  174.23    4.87
   0  -2   9  165.71    3.46
   0  -1  12  579.19    7.25
   0   1  12  647.41    6.32
   0  -1 -12  608.32    6.49
   0  -1  12  600.60    6.59
   0   1  12  616.44    7.31
   0  -1 -12  589.92    7.67
   0   1  12  669.74    9.78
   0  -1  12  586.01    5.81
   3   0   2  600.47    8.29
  -3   0  -2  614.90    8.17
   3   0   2  625.60    5.67
   3   0   2  607.02    8.54
  -2   0  -9   -0.08    1.35
   2   0   9    0.41    1.55
   2   0   9   -0.08    0.84
  -2   0  -9   -0.19    0.54
  -2   0  -9    0.23    0.56
  -2   0  -9    0.67    1.20
  -2  -2  -3  327.38    4.61
   2   2   3  322.19    5.85
  -2   2  -3  334.65    5.46
  -2   2  -3  323.79    5.65
   2  -2   3  328.71    3.86
   2  -2   3  323.50    5.28
  -2  -2  -3  308.33    5.64
   2   2   3  325.54    5.02
   2   2   3  316.27    5.44
   2  -2   3  313.39    5.64
  -2  -2  -3  322.19    5.14
   2   1   8 1277.32   11.91
  -2  -1  -8 1288.95   12.13
  -2   1  -8 1267.81    6.83
   2  -1   8 1232.42    7.25
   2   1   8 1347.50   10.37
   2  -1   8 1298.45   11.94
  -2  -1  -8 1321.45   11.79
   1  -1  11  120.38    3.20
  -1  -1 -11  129.30    3.40
  -1   1 -11  126.21    2.65
   1   1  11  126.53    3.85
   1  -1  11  122.61    2.88
  -1  -1 -11  117.54    3.38
   1  -1  11  118.96    3.83
  -1  -1 -11  127.02    3.78
   1   1  11  127.50    3.49
  -1  -1 -11  113.79    3.63
   3   0  -5   -0.05    0.78
   3   0  -5   -0.06    0.59
   3   0  -5    0.21    0.48
  -3   0   5    0.68    0.73
  -3   0   5   -0.06    1.10
   2   2  -5  221.12    4.03
   2   2  -5  204.87    3.96
   2   2  -5  209.34    4.14
   2  -2  -5  191.11    4.92
  -2   2   5  200.55    4.12
   2  -2  -5  208.74    2.70
   2   2  -5  198.33    3.75
   2  -2  -5  200.31    3.90
  -2  -2   5  192.54    3.98
  -2  -2   5  202.54    3.87
  -2  -2   5  215.66    4.09
   2  -2  -5  209.39    3.31
   0   0 -13   -0.31    1.03
   0   0  13   -0.11    1.28
   0   0  13   -0.18    0.73
   0   0 -13    0.40    1.19
   0   0  13   -0.07    0.73
  -1   2  -8  574.05    7.13
  -1   2  -8  606.88    5.91
  -1  -2  -8  624.14    6.99
  -1   2  -8  621.94    7.92
   1  -2   8  582.73    7.19
   1  -2   8  592.56    5.75
  -1  -2  -8  597.89    6.79
   1  -2   8  580.58    7.03
  -1  -2  -8  594.74    7.40
   1   2   8  601.75    6.93
   1   2   8  586.16    6.98
   1   0  12 3670.96   20.09
  -1   0 -12 3542.00   15.30
   1   0  12 3527.78   17.76
   1   0  12 3130.95   18.04
  -1   0 -12 3707.34   20.97
  -1   0 -12 3135.44   18.09
   1  -1 -12    1.34    1.02
  -1  -1  12    1.11    1.05
  -1   1  12    1.01    0.89
   1  -1 -12    1.40    1.07
   1  -1 -12    1.32    0.68
  -1   1  12    1.45    0.55
   1   1 -12    1.56    0.77
  -1  -1  12    1.18    0.62
  -1   1  12    0.80    1.26
   2   0 -11   -0.11    0.82
   2   0 -11   -0.01    0.71
  -2   0  11   -0.14    0.95
  -3   0  -3   -0.12    0.54
   3   0   3    0.01    1.48
   3   0   3   -0.05    1.00
  -3   0  -3    0.46    1.23
   3   0   3    0.35    0.59
   2  -1 -10  244.82    2.98
   2   1 -10  253.18    4.15
   2  -1 -10  252.84    5.03
  -2   1  10  254.45    3.22
   2  -1 -10  235.68    4.16
   2   1 -10  235.57    2.73
  -2   1  10  231.24    4.06
  -2  -1  10  246.76    4.49
  -2   1  10  228.95    6.01
   1  -2  -9  565.97    5.93
   1  -2  -9  623.24    6.38
  -1   2   9  608.98    6.43
  -1   2   9  587.45    5.42
   1   2  -9  624.83    6.59
   1  -2  -9  592.22    6.27
   1   2  -9  578.86    6.11
  -1  -2   9  602.58    6.78
  -1  -2   9  600.51    6.29
  -1  -2   9  551.52    5.97
   1   2  -9  583.29    6.93
  -2   2  -4 1818.33   13.59
  -2   2  -4 1839.01   13.12
  -2  -2  -4 1756.83   12.22
  -2  -2  -4 1762.41   13.42
   2  -2   4 1641.48   12.55
  -2  -2  -4 1716.83   12.02
   2   2   4 1748.32   11.78
   2   2   4 1699.29   13.31
   2   2   4 1719.47   12.65
   2  -2   4 1753.40    8.86
   2  -2   4 1727.28   12.33
  -3  -1   1    4.34    0.90
   3  -1  -1    3.58    1.25
   3   1  -1    3.91    0.67
  -3  -1   1    4.89    1.45
   3   1  -1    3.48    0.96
   3   1  -1    4.96    1.29
   3  -1  -1    4.31    0.85
  -3  -1   1    3.64    0.60
   1   0 -13   -0.24    0.74
   1   0 -13    0.44    1.01
  -1   0  13   -0.64    0.91
   3  -1  -2 4953.26   12.01
   3   1  -2 4882.42   21.44
   3   1  -2 4865.06   18.98
   3  -1  -2 4707.92   21.91
  -3  -1   2 4962.05   19.10
  -3  -1   2 4745.25   21.49
   3  -1  -2 4886.98   20.40
   3   1  -2 4982.97   14.53
  -3  -1   2 4882.24   14.24
   3  -1  -2 5030.32   14.00
   3  -1   0 1273.08   11.33
  -3   1   0 1398.00    5.87
   3  -1   0 1358.49    6.00
   3   1   0 1370.54   10.06
  -3  -1   0 1375.23    7.12
  -3  -1   0 1345.83   11.90
   3  -1   0 1394.85   11.48
   3  -1   0 1471.44    6.06
   3   1   0 1370.30   11.93
  -3  -1   0 1392.98   10.33
   3   0  -6 1125.69    7.12
   3   0  -6 1022.93    9.49
   3   0  -6 1086.38    7.95
   3   0  -6 1151.63    9.14
  -3   0   6 1065.93    9.05
  -2  -2   6 3464.10   15.74
   2  -2  -6 3632.68   13.60
   2  -2  -6 3618.69   12.46
   2   2  -6 3627.29   15.97
   2  -2  -6 3593.65   20.75
  -2  -2   6 3667.61   16.34
   2   2  -6 3651.77   15.59
   2  -2  -6 3652.10   15.97
   2   2  -6 3720.20   17.08
   2   2  -6 3591.51   15.91
  -2  -2   6 3565.20   16.48
  -2   2   6 3663.41   17.11
  -3  -1   3    2.60    1.15
   3  -1  -3    3.39    1.06
   3  -1  -3    2.93    0.73
   3   1  -3    3.57    0.92
  -3  -1   3    3.76    0.61
   3  -1  -3    3.36    1.15
  -3  -1   3    4.20    0.82
   3   1  -3    2.59    1.18
   3  -1  -3    3.35    1.42
   3   1  -3    3.55    0.69
   3  -1  -3    4.19    0.62
  -3   1  -1 1206.86    5.76
   3   1   1 1241.92   11.71
  -3  -1  -1 1143.75   10.98
   3   1   1 1197.54    9.33
   3  -1   1 1242.98    5.75
   3  -1   1 1251.20    4.91
  -3  -1  -1 1229.85    9.72
  -3  -1  -1 1186.71    6.49
   3  -1   1 1154.65   11.26
  -3   0  -4  248.95    5.53
   3   0   4  255.05    3.84
   3   0   4  259.99    5.85
   3   0   4  245.78    5.67
   0   2  10  289.34    5.00
   0   2  10  261.90    4.32
   0   2 -10  248.15    5.22
   0  -2 -10  255.39    4.64
   0  -2  10  256.99    4.28
   0  -2  10  246.28    4.33
   0  -2 -10  244.22    4.40
   0  -2 -10  271.94    4.65
   0   2 -10  283.99    4.70
   0  -2  10  265.42    4.26
   0  -2 -10  219.90    5.83
   3  -1  -4  102.84    1.91
  -3  -1   4  105.11    3.20
   3  -1  -4  110.00    2.71
  -3  -1   4   99.09    2.20
   3   1  -4  106.57    3.15
   3  -1  -4  103.26    2.94
   3   1  -4  107.02    2.34
   3   1  -4   98.60    2.78
  -3  -1   4  101.94    2.76
  -2  -2  -5   81.33    2.76
   2   2   5   80.55    2.69
  -2  -2  -5   73.11    3.05
  -2  -2  -5   72.66    2.72
   2   2   5   74.91    3.07
  -2   2  -5   82.03    3.10
   2  -2   5   75.52    2.98
  -2   2  -5   77.55    2.01
   2  -2   5   74.51    1.90
   2   2   5   74.24    2.92
   2  -2   5   76.53    2.99
  -3  -1  -2  266.24    3.19
   3   1   2  250.96    4.27
   3   1   2  252.02    5.52
  -3  -1  -2  266.17    4.67
  -3   1  -2  269.90    2.95
  -3   1  -2  253.49    5.50
   3  -1   2  241.95    5.35
   2   0  10    4.45    1.75
   2   0  10    4.72    1.03
  -2   0 -10    3.75    0.71
  -2   0 -10    3.58    1.43
  -2   0 -10    4.00    0.80
   2   0  10    3.41    1.22
  -2   0 -10    4.74    1.41
   2  -1   9    0.01    0.56
   2  -1   9   -0.46    1.46
  -2   1  -9   -0.11    2.25
  -2  -1  -9    0.09    1.33
   2   1   9   -0.45    1.52
  -2  -1  -9    0.24    1.29
  -2  -1  -9    0.65    0.95
  -2   1  -9    0.16    0.43
   0   3   0    0.03    0.71
   0  -3   0    0.34    0.64
   0  -3   0    0.18    1.02
   0   3   0    0.04    0.78
   0  -3   0    0.12    0.55
   0  -3   1    7.30    0.96
   0   3  -1    7.55    1.15
   0   3   1    7.54    1.16
   0  -3  -1    7.20    0.86
   0  -3  -1    8.36    1.37
   0   3   1    7.00    0.93
   0  -3   1    7.75    0.87
   0  -3   1    6.91    1.28
   0  -3  -1    8.31    1.00
   0   3  -1    8.24    1.02
   3   0  -7    0.17    0.87
  -3   0   7    0.12    0.74
   3   0  -7    0.19    0.61
   3   0  -7   -0.10    0.68
   3   0  -7    0.46    0.63
  -3   0   7    0.13    0.82
   1  -2   9  272.61    5.17
   1  -2   9  274.36    4.93
  -1  -2  -9  300.74    6.68
  -1  -2  -9  297.77    5.43
   1   2   9  281.14    5.24
   1   2   9  292.82    5.21
   1  -2   9  289.47    4.21
  -1   2  -9  299.07    5.31
  -1   2  -9  290.37    5.70
  -1  -2  -9  295.62    4.93
  -1   2  -9  276.60    4.04
  -1  -2  -9  287.12    4.99
   1   2   9  283.27    4.98
  -3  -1   5  359.71    5.68
   3   1  -5  376.11    5.74
   3  -1  -5  408.83    5.24
   3  -1  -5  388.18    5.47
   3   1  -5  379.31    4.45
  -3  -1   5  373.26    5.14
  -3  -1   5  398.53    4.75
   3  -1  -5  440.35    6.48
   3  -1  -5  359.07    3.60
   3   1  -5  361.11    5.23
   2   2  -7  171.18    3.60
   2  -2  -7  170.85    3.51
  -2  -2   7  148.76    3.37
   2   2  -7  172.44    3.80
   2  -2  -7  174.36    3.17
   2   2  -7  169.98    3.75
  -2   2   7  168.65    3.71
   2  -2  -7  147.48    4.43
   2   2  -7  157.31    3.35
  -2  -2   7  165.59    3.65
   0  -1  13  413.67    6.27
   0   1  13  417.44    6.30
   0   1 -13  421.08    5.37
   0  -1  13  422.67    5.87
   0   1  13  393.99    7.90
   0  -1  13  467.55    5.25
   0  -1 -13  395.78    5.48
   0   1  13  487.71    5.68
   0  -1 -13  442.05    6.96
   0   3  -2   34.62    1.66
   0   3  -2   33.67    1.95
   0  -3  -2   34.27    2.11
   0   3   2   32.84    1.96
   0   3   2   33.47    1.64
   0  -3   2   33.77    1.69
   0   3  -2   31.93    1.12
   0  -3  -2   34.81    1.64
   0  -3  -2   34.74    1.71
   0  -3   2   33.85    1.55
  -1  -2  10    9.77    1.24
   1  -2 -10    8.37    1.70
   1  -2 -10    9.47    1.03
  -1   2  10    9.60    1.08
  -1  -2  10    8.31    1.05
   1   2 -10    9.02    1.04
   1   2 -10    8.72    1.33
  -1   2  10   10.72    1.12
   1   2 -10    9.70    1.00
   1  -2 -10    9.09    1.18
   1  -2 -10    8.82    1.18
  -1  -2  10    8.78    1.02
  -1  -1 -12   39.54    2.17
   1  -1  12   38.65    2.52
   1  -1  12   33.82    2.24
  -1  -1 -12   40.81    2.44
   1  -1  12   39.58    1.82
  -1  -1 -12   41.64    2.04
   1   1  12   37.50    2.07
  -1  -1 -12   31.25    2.09
   1   1  12   40.55    2.48
  -1   1 -12   38.08    1.58
   1  -1  12   38.44    2.02
   1   1  12   42.56    2.70
   2   1 -11   54.73    1.29
   2   1 -11   58.07    2.13
  -2   1  11   51.67    2.15
   2  -1 -11   49.31    2.17
   2  -1 -11   60.69    2.69
  -2   1  11   52.67    3.17
   2  -1 -11   54.95    1.47
  -2   1  11   58.92    1.56
  -2  -1  11   53.11    2.31
  -3   1  -3  203.27    5.12
  -3   1  -3  205.17    2.73
   3   1   3  200.97    3.92
  -3  -1  -3  195.53    4.76
  -3  -1  -3  211.22    2.89
   3  -1   3  195.46    4.96
  -3  -1  -3  210.39    4.20
   3   1   3  192.06    4.84
   3   0   5    0.04    0.67
  -3   0  -5   -0.16    1.28
   3   0   5    0.31    1.62
  -3   0  -5    0.54    0.68
   3   0   5   -0.32    1.15
  -3   0  -5   -0.33    1.28
   2   0 -12  144.95    3.68
   2   0 -12  142.55    3.42
   0  -3  -3   44.88    2.36
   0   3  -3   43.45    2.22
   0   3  -3   44.71    1.87
   0   3   3   45.03    1.90
   0   3   3   40.24    2.14
   0  -3   3   47.67    2.06
   0  -3  -3   44.39    1.86
   0   3  -3   42.27    1.49
   0  -3   3   46.24    1.24
   0  -3   3   44.30    1.73
   0   0 -14  933.16   10.58
   0   0  14  925.43    7.67
  -1   1  13  153.77    3.54
  -1  -1  13  152.04    3.64
   1   1 -13  174.10    3.70
   1  -1 -13  177.27    4.54
  -1  -1  13  175.09    4.05
  -1   1  13  176.91    2.73
  -1   1  13  189.44    5.75
   1  -1 -13  157.85    2.76
   1  -1 -13  161.59    4.07
  -1   0 -13    0.13    1.39
   1   0  13   -0.31    1.13
   1   0  13    0.22    1.62
   1   0  13   -0.16    1.05
  -1   0 -13   -0.64    0.88
   3  -1  -6 1022.02    8.68
   3  -1  -6  933.75    8.77
   3  -1  -6 1011.84    8.97
   3  -1  -6  921.74    5.95
   3  -1  -6 1045.60   10.05
   3   1  -6  964.51    7.18
  -3  -1   6  958.57    7.51
  -3   1   6  981.75   10.25
   3   1  -6  927.20    8.34
   3   1  -6  916.19    8.34
  -3  -1   6  927.10    8.77
  -2  -2  -6  691.59    8.23
  -2   2  -6  630.73    5.62
   2   2   6  635.42    7.30
  -2   2  -6  660.46    8.43
   2   2   6  659.18    8.93
   2  -2   6  616.76    7.97
  -2  -2  -6  642.77    8.45
   2   2   6  645.65    8.22
   2  -2   6  576.00   11.45
  -2  -2  -6  618.10    7.58
   2  -2   6  639.41    5.58
   2  -2   6  644.10    8.00
   3   0  -8  385.99    4.74
   3   0  -8  355.75    5.76
  -3   0   8  381.80    5.80
   3   0  -8  357.17    4.62
   1   0 -14  510.56    7.44
  -1   0  14  523.32    8.17
   1   0 -14  508.62    6.42
   0  -3   4 2819.81   12.77
   0  -3   4 2977.06    9.93
   0   3  -4 2948.95   14.08
   0   3  -4 2860.25   12.15
   0   3  -4 2827.04   16.53
   0   3   4 2920.80   14.46
   0  -3   4 2996.88   15.93
   0  -3  -4 2935.20   16.40
   0  -3  -4 2923.19   14.24
  -3   1  -4   22.78    2.08
  -3  -1  -4   23.40    1.50
  -3   1  -4   24.50    1.09
   3  -1   4   23.76    2.25
  -3  -1  -4   25.65    2.08
  -3  -1  -4   23.29    1.04
   3   1   4   22.95    1.91
   3   1   4   22.70    1.46
   3  -1   4   29.49    2.34
  -2  -2   8  430.12    5.60
   2   2  -8  431.52    5.94
   2  -2  -8  439.03    5.10
   2  -2  -8  450.51    5.56
   2  -2  -8  432.96    7.52
   2   2  -8  428.33    5.56
   2   2  -8  430.35    5.37
   2   2  -8  450.05    6.03
  -2   2   8  448.27    5.97
   1  -3   0  296.50    3.68
   1  -3   0  300.67    4.75
  -1   3   0  297.94    3.89
   1  -3   0  253.20    2.24
   1   3   0  313.93    3.35
   1   3   0  300.48    5.05
  -1   3   0  300.20    5.48
   1  -3   0  287.80    5.23
   1   3   0  299.41    5.52
  -1  -3   0  263.81    4.72
  -1  -3   0  302.54    4.96
   1   3  -1   19.52    1.01
   1  -3  -1   20.52    1.70
  -1  -3   1   21.86    1.51
   1   3  -1   24.73    1.65
   1  -3  -1   22.78    1.14
   1   3  -1   20.24    1.62
   1  -3  -1   20.85    1.37
  -1  -3   1   23.82    1.49
  -1   3   1   22.53    1.20
   0  -2 -11  593.19    7.00
   0  -2  11  571.76    6.77
   0  -2  11  592.56    6.60
   0   2 -11  567.37    8.15
   0   2  11  633.76    6.95
   0  -2  11  597.53    6.65
   0  -2 -11  558.84    6.90
   0  -2 -11  661.51    7.41
   0   2 -11  591.34    6.93
   0   2 -11  520.47    5.97
   0   2  11  660.27    7.61
   1   3   1   46.67    1.41
  -1   3  -1   42.69    2.21
   1  -3   1   40.30    1.16
   1  -3   1   41.96    1.82
   1   3   1   43.97    2.24
  -1   3  -1   38.76    1.24
  -1   3  -1   43.81    1.72
   1  -3   1   41.27    2.22
   1  -3   1   40.72    1.43
  -1  -3  -1   40.74    1.88
   1   3   1   42.07    2.03
  -1  -3  -1   43.16    2.39
   1   3  -2   55.43    1.62
   1   3  -2   50.12    2.28
   1  -3  -2   47.89    1.59
  -1  -3   2   52.25    2.25
   1   3  -2   48.20    2.12
  -1   3   2   50.62    1.71
   1  -3  -2   50.71    2.37
  -1  -3   2   49.57    2.04
  -2  -1 -10  192.34    4.92
   2  -1  10  172.37    3.25
   2  -1  10  183.39    4.90
  -2  -1 -10  165.18    4.59
   2   1  10  191.52    5.01
   2  -1  10  169.37    5.06
  -2  -1 -10  179.28    4.10
  -2   1 -10  185.25    2.90
  -3   0  -6 1796.09   10.99
  -3   0  -6 1573.93    5.47
   3   0   6 1826.93   11.20
  -3   0  -6 2095.26   16.51
   3   0   6 1659.20   14.49
  -3   0  -6 1760.53   14.96
   3   0   6 1890.18   16.36
   3   1  -7    0.02    0.78
  -3  -1   7    0.33    0.56
  -3   1   7    0.47    1.09
   3   1  -7    0.32    0.60
  -3  -1   7   -0.04    0.86
   3  -1  -7    0.19    0.85
   3  -1  -7    0.06    0.83
   3  -1  -7    0.53    0.93
   3   1  -7    0.09    0.71
   3  -1  -7   -0.01    0.90
  -1  -2 -10   85.57    3.79
  -1   2 -10   73.43    2.19
   1  -2  10   69.34    2.59
   1  -2  10   70.01    2.86
  -1   2 -10   77.22    3.26
  -1  -2 -10   79.52    2.94
   1   2  10   79.26    2.94
   1  -2  10   73.70    2.23
  -1  -2 -10   76.71    2.64
  -1  -2 -10   77.98    3.01
   1   2  10   79.07    2.95
   2   0  11   -0.91    1.08
  -2   0 -11    0.09    0.67
  -2   0 -11   -0.24    0.68
   2   0  11   -0.08    1.65
  -2   0 -11   -0.23    1.40
   2   0  11   -0.11    1.06
  -2   0 -11   -0.30    1.50
   1  -3   2  277.79    4.48
  -1  -3  -2  279.32    5.42
   1  -3   2  271.81    3.17
  -1   3  -2  299.60    3.68
  -1   3  -2  290.90    3.97
  -1  -3  -2  299.00    5.02
  -1   3  -2  295.05    5.55
   1  -3   2  282.42    5.27
   1  -3   2  283.66    3.43
   1   3   2  294.04    4.97
   1   3   2  288.01    5.45
   1   3  -3    5.08    0.98
  -1  -3   3    4.37    1.18
   1  -3  -3    4.60    0.71
   1   3  -3    4.59    0.90
  -1  -3   3    5.17    0.91
  -1  -3   3    4.90    0.84
   1   3  -3    4.35    1.01
   1   3  -3    5.58    0.80
  -1   3   3    4.55    0.73
   1  -3  -3    4.46    1.17
   0  -3   5   49.29    1.60
   0   3  -5   50.14    2.35
   0  -3  -5   50.56    2.04
   0   3   5   40.36    0.84
   0   3   5   50.07    2.06
   0  -3   5   50.90    2.11
   0   3  -5   51.84    2.02
   0  -3  -5   45.69    2.39
   0   3  -5   48.32    2.03
   0  -3   5   41.64    2.24
   1  -2 -11   69.33    2.55
  -1   2  11   71.71    2.22
   1   2 -11   73.86    2.92
  -1  -2  11   68.31    2.21
   1  -2 -11   78.91    2.53
  -1  -2  11   74.75    2.54
  -1  -2  11   75.16    2.56
   1   2 -11   75.03    2.45
  -1   2  11   74.45    2.34
   1   2 -11   76.60    2.31
   2   2   7 1649.74   11.97
  -2   2  -7 1561.89    8.82
   2   2   7 1560.09   13.81
   2  -2   7 1628.68    9.13
  -2  -2  -7 1550.49   13.10
   2  -2   7 1611.32   12.61
  -2  -2  -7 1643.94   12.27
  -2  -2  -7 1606.89   12.49
   2   2   7 1571.66   12.83
  -2   2  -7 1659.32   13.70
   3   1   5  114.23    3.05
   3  -1   5   81.78    1.34
   3  -1   5  102.96    3.84
   3  -1   5  148.56    4.81
  -3  -1  -5  108.92    3.80
  -3  -1  -5  112.81    2.20
  -3  -1  -5  119.79    3.31
  -3   1  -5  112.56    2.29
   3   1   5  110.18    3.85
  -3  -1  -5  117.59    3.99
   2   1 -12  655.99    4.11
   2  -1 -12  708.48    4.72
  -2   1  12  680.47    7.28
   2  -1 -12  803.87    9.41
   2  -1 -12  679.35    7.61
  -2   1  12  718.20    4.91
  -2  -1  12  714.82    7.72
   2   1 -12  738.60    7.38
  -2   1  12  570.70    9.61
   3   0  -9    0.70    0.63
   3   0  -9    0.09    0.88
   3   0  -9    0.04    0.63
  -3   0   9    0.82    1.47
   3   0  -9    0.01    0.66
  -3   0   9   -0.12    0.89
   1  -3   3  468.45    4.58
   1  -3   3  514.08    6.38
  -1  -3  -3  452.58    6.76
  -1   3  -3  508.94    5.16
   1   3   3  523.02    7.62
  -1   3  -3  477.19    6.99
   1  -3   3  466.86    6.84
  -1   3  -3  506.15    5.20
   1   3   3  483.25    6.42
  -1  -3  -3  499.06    6.51
  -1  -3   4   97.46    3.03
  -1  -3   4   91.80    2.73
  -1  -3   4   86.43    3.01
   1   3  -4   96.08    2.93
   1   3  -4   93.42    2.83
   1  -3  -4   90.24    2.32
   1  -3  -4   94.38    3.16
   1   3  -4   89.36    2.94
   1   3  -4   95.71    2.35
  -1   3   4   93.29    2.41
   0  -1 -14   17.64    1.46
   0  -1  14   22.57    1.64
   0  -1  14   21.22    1.87
   0  -1 -14   21.53    2.00
   0  -1  14   21.87    1.36
   0   1  14   19.84    2.18
   0   1  14   24.25    1.49
   0   1  14   22.78    1.96
   0  -1  14   15.11    1.43
   0   1 -14   21.60    1.40
   2   0 -13   -0.04    0.77
   2   0 -13   -0.27    0.95
  -1   1 -13   89.07    2.47
   1  -1  13   77.18    2.66
   1  -1  13   83.26    2.81
   1   1  13   77.34    2.90
   1  -1  13   78.02    3.29
  -1  -1 -13   87.05    3.26
   1   1  13   82.16    3.49
  -1  -1 -13   92.47    3.10
   1   1  13   84.02    3.42
  -1  -1 -13   83.64    3.12
   1  -1  13   75.10    3.27
  -1  -1 -13   86.26    3.48
   2   2  -9  210.34    4.01
   2   2  -9  214.87    4.18
   2   2  -9  200.38    3.62
  -2  -2   9  199.35    3.81
   2  -2  -9  218.48    3.91
  -2  -2   9  212.37    4.23
   2  -2  -9  186.23    4.98
  -2   2   9  211.84    4.07
   2   2  -9  202.81    4.28
   2  -2  -9  202.80    3.63
   3   1  -8    2.13    0.83
   3   1  -8    2.21    0.89
  -3  -1   8    1.59    0.84
   3   1  -8    1.64    0.67
  -3  -1   8    1.78    0.66
   3  -1  -8    1.68    0.91
   3  -1  -8    3.39    1.00
  -3   1   8    2.12    1.15
   3  -1  -8    1.75    0.82
   3  -1  -8    1.96    0.88
   0  -3  -6  409.65    3.77
   0  -3   6  432.53    6.44
   0  -3  -6  495.67    6.25
   0   3  -6  467.19    6.80
   0   3  -6  490.58    5.87
   0  -3   6  507.62    5.01
   0  -3   6  502.68    6.48
   0   3  -6  458.41    5.91
   0   3   6  474.62    6.13
   0  -3  -6  487.88    7.07
  -3   0  -7    0.21    0.73
   3   0   7    0.02    1.82
  -3   0  -7    0.18    1.51
  -3   0  -7   -0.32    1.79
   3   0   7    0.17    1.37
   1  -1 -14  409.01    7.03
  -1   1  14  375.87    8.22
  -1   1  14  406.28    4.09
   1   1 -14  412.69    5.63
  -1  -1  14  377.12    5.94
  -1  -1  14  338.77    5.47
   1  -1 -14  374.95    6.39
  -1   1  14  354.08    5.43
   1  -1 -14  336.00    3.95
  -1   3  -4  704.85    6.10
  -1  -3  -4  669.56    7.48
   1  -3   4  667.89    5.90
  -1   3  -4  699.56    8.73
   1   3   4  694.47    8.81
   1  -3   4  691.16    7.16
  -1  -3  -4  706.93    8.69
   1   3   4  698.58    7.81
  -1  -3   5   61.14    2.65
   1   3  -5   61.50    2.44
   1  -3  -5   68.19    2.17
  -1  -3   5   64.72    2.29
   1   3  -5   64.00    2.08
   1   3  -5   60.76    2.46
   1  -3  -5   62.91    2.58
  -1   3   5   64.83    2.69
   1  -3  -5   53.89    1.22
   1   3  -5   65.72    2.46
  -1   3   5   63.55    2.14
  -1  -3   5   68.54    2.53
  -1   0 -14 2406.20   17.82
   1   0  14 2544.38   17.96
   1   0  14 2310.56   16.67
  -1   0 -14 2489.76   14.16
   1   0  14 2625.99   16.47
   0   0  15    0.06    0.96
   0   0  15   -0.68    0.85
   0   0 -15   -0.13    0.94
   0   0 -15    0.03    1.50
   0   0 -15   -0.46    0.92
   0  -2 -12  356.44    5.69
   0  -2 -12  315.12    5.51
   0   2 -12  363.90    5.50
   0   2  12  343.65    5.33
   0  -2  12  360.03    5.48
   0   2  12  364.00    5.76
   0   2 -12  324.70    6.45
   0  -2 -12  355.04    5.68
   0  -2  12  325.10    5.34
   0  -2  12  346.35    5.14
   0   2 -12  340.67    5.00
  -3  -1  -6  808.20   10.22
  -3  -1  -6 1093.49    8.93
  -3   1  -6 1161.34   16.98
   3  -1   6  690.47    4.43
  -3  -1  -6  808.18    8.58
   3  -1   6 1013.39   12.61
  -3  -1  -6  752.77    9.72
   3   1   6  739.81    9.83
  -3   1  -6  787.30    6.34
   3   1   6  751.54    7.76
   3  -1   6  747.16    9.97
  -2   1 -11   19.12    1.05
  -2  -1 -11   20.25    1.98
   2  -1  11   18.63    1.36
   2  -1  11   24.93    2.28
   2   1  11   20.93    1.92
   2   1  11   20.68    2.17
  -2  -1 -11   16.08    1.84
  -2  -1 -11   20.67    1.79
   2  -1  11   19.98    2.17
  -2   2  -8  873.59    6.94
   2  -2   8  836.52    9.55
   2   2   8  864.68    9.80
  -2  -2  -8  852.46    9.58
  -2  -2  -8  855.54    8.99
  -2   2  -8  880.13   10.38
   2   2   8  868.04    8.94
   2  -2   8  868.78    6.80
   1   0 -15   -0.15    0.82
  -1   0  15   -0.21    0.34
  -1   0  15    0.18    0.98
  -1   0  15   -0.55    0.37
   1   0 -15   -0.55    1.20
  -1  -2 -11    2.79    1.34
  -1   2 -11    2.81    1.52
  -1  -2 -11    2.71    1.29
  -1  -2 -11    3.53    0.88
   1   2  11    3.54    1.38
   1  -2  11    2.91    1.06
  -1   2 -11    3.35    0.76
   1  -2  11    1.52    2.16
   1  -2  11    2.01    1.40
   1  -2  11    4.40    0.79
   1   2  11    3.69    1.13
  -1  -2 -11    3.39    1.57
   3   0 -10 1229.51    9.13
  -3   0  10 1230.96   11.57
   3   0 -10 1216.85    7.62
  -1   3  -5 1052.73    7.58
   1  -3   5 1038.98    8.88
  -1   3  -5 1062.99    8.79
  -1  -3  -5 1017.26    9.54
  -1  -3  -5 1012.39   10.40
   1   3   5 1006.74    9.36
   1   3   5 1033.15    7.74
   1  -3   5 1003.48    7.73
  -1   3  -5 1001.57   10.47
  -1   3  -5  933.79    8.21
   1   3   5  986.79   10.70
  -1  -3  -5 1052.18    7.35
  -2   0 -12 3187.25   13.66
  -2   0 -12 3208.26   20.90
  -2   0 -12 3159.24   16.63
   1   2 -12   11.13    1.17
  -1  -2  12   10.96    1.16
  -1  -2  12   11.80    1.14
  -1   2  12   12.05    1.23
   1   2 -12   12.66    1.15
  -1   2  12   12.53    1.12
   1   2 -12   11.42    1.55
   1  -2 -12   11.16    1.69
   1  -2 -12   11.69    1.45
  -1  -2  12   10.48    1.37
   1  -2 -12   11.35    1.21
   1   3  -6  569.98    6.86
   1  -3  -6  574.75    7.55
   1  -3  -6  498.18    4.07
   1   3  -6  522.76    6.95
  -1  -3   6  576.16    7.13
   1   3  -6  568.33    6.21
  -1   3   6  568.29    7.57
  -1  -3   6  536.49    6.26
   1   3  -6  565.33    7.03
  -1  -3   6  540.05    7.26
   1  -3  -6  553.20    5.85
  -1  -3   6  608.73    5.93
   0   3  -7 1155.35    9.12
   0   3   7 1125.14   10.75
   0  -3   7 1118.51    9.72
   0  -3   7 1064.45    9.93
   0  -3  -7 1149.62   10.75
   0  -3  -7 1121.25    9.40
   0  -3   7 1168.50    7.93
   0   3  -7 1054.17    9.42
   0  -3  -7 1111.46    6.80
   0   3   7 1096.80    9.69
   0   3  -7 1093.82   10.18
   3   1  -9   36.77    1.84
  -3   1   9   43.48    2.80
   3  -1  -9   41.33    1.73
   3   1  -9   39.26    1.74
  -3  -1   9   37.40    1.72
   3   1  -9   35.87    1.59
   3  -1  -9   33.21    1.77
  -3  -1   9   34.98    1.72
   3  -1  -9   38.99    2.11
   3  -1  -9   33.80    1.92
   2   2 -10 1749.56   12.71
   2   2 -10 1859.31   12.24
  -2   2  10 1754.60   10.63
   2  -2 -10 1672.91   14.54
  -2  -2  10 1825.92   12.14
  -2   2  10 1855.37   11.70
  -2  -2  10 1780.77   11.12
   2  -2 -10 1802.80   11.13
   2   2 -10 1730.22   10.30
   2   2 -10 1860.37   12.36
   2  -2 -10 1944.37   11.67
   3   2  -1  121.71    3.91
   3   2  -1  129.28    3.66
   3  -2  -1  121.72    3.64
  -3  -2   1  129.98    3.01
   3  -2  -1  126.43    3.79
   3   2  -1  119.32    3.81
   2  -1 -13  143.70    3.77
   2  -1 -13  139.02    2.10
   2  -1 -13  162.37    4.55
   2   1 -13  148.92    3.46
  -2   1  13  139.92    2.13
   2   1 -13  105.48    1.60
  -2  -1  13  139.53    3.63
  -2   1  13  138.85    3.44
  -2   1  13  115.65    4.68
  -2  -1  13  113.57    1.73
   2   1 -13  137.05    3.92
   3   2  -2  115.76    3.76
   3   2  -2  118.33    3.38
  -3  -2   2  110.58    3.62
   3  -2  -2  118.30    3.55
   3  -2  -2  130.98    3.61
   3  -2  -2  121.41    3.60
  -3  -2   2  122.68    2.91
   3   2  -2  130.31    3.03
   3   2  -2  115.93    3.67
   3  -2   0  262.11    5.39
  -3  -2   0  274.41    4.38
   3   2   0  265.24    5.75
   3   2   0  252.77    5.49
   3   2   0  267.63    5.03
   3  -2   0  260.81    5.33
   3  -2   0  258.99    3.44
  -3   0  -8 4026.78   17.49
  -3   0  -8 4006.16   23.71
   3   2  -3 1462.38   10.00
   3   2  -3 1198.31   11.10
   3   2  -3 1386.52   11.38
   3  -2  -3 1333.17   11.30
   3  -2  -3 1428.33   12.11
  -3  -2   3 1226.24   11.30
   3  -2  -3 1374.72   11.43
  -3  -2   3 1402.89    9.88
   2   0 -14  774.18    8.12
   2   0 -14  731.23    8.74
  -3  -2  -1    1.52    1.15
   3   2   1    2.09    0.92
   3   2   1    1.81    1.18
   3   2   1    2.10    1.42
   3  -2   1    2.53    1.47
  -3  -2  -1    1.79    0.67
   3  -2   1    2.03    1.18
   3  -1   7   24.77    2.41
  -3   1  -7   23.94    1.28
   3   1   7   22.82    2.12
  -3  -1  -7   34.22    1.94
   3  -1   7   20.65    0.96
  -3  -1  -7   23.91    2.24
   3  -1   7   30.99    2.64
   3   1   7   23.07    1.61
  -3  -1  -7   24.63    1.67
  -3  -1  -7   21.84    2.11
   1  -3   6  803.99    7.37
  -1   3  -6  830.75    8.00
  -1  -3  -6  810.29    8.79
   1   3   6  795.73    8.40
   1   3   6  840.55    7.26
  -1   3  -6  847.21    6.89
  -1   3  -6  790.66    9.40
  -1  -3  -6  857.10    7.09
   1  -3   6  801.54    7.94
  -1   3  -6  847.41    8.56
  -1  -3  -6  792.74    9.48
   3   2  -4    0.36    0.87
   3  -2  -4    0.21    1.17
   3  -2  -4   -0.37    1.86
   3   2  -4    0.28    0.71
  -3  -2   4    0.37    0.62
   3  -2  -4    0.37    1.01
  -3  -2   4    0.27    1.08
   3   2  -4    0.30    0.94
   3  -2  -4    0.23    0.21
   3  -2  -4    0.04    0.96
   1   1  14  248.31    5.67
  -1  -1 -14  216.36    4.95
  -1  -1 -14  254.76    5.40
  -1   1 -14  258.87    4.22
   1  -1  14  190.98    5.14
  -1  -1 -14  249.57    5.82
   1   1  14  262.75    5.19
  -1  -1 -14  227.74    5.19
   1  -1  14  244.73    5.10
   1  -1  14  217.86    4.49
   1  -1  14  246.60    5.57
   1   1  14  212.04    5.60
   0   1  15  103.28    4.43
   0   1  15  103.25    3.48
   0  -1  15  100.06    3.32
   0   1  15  105.08    2.83
   0  -1 -15   97.87    3.63
   0  -1  15  101.59    3.46
   0  -1 -15   92.59    2.99
   0   1 -15  101.76    2.87
   0  -1  15  102.39    2.64
  -1  -3   7  130.19    3.45
   1   3  -7  118.14    3.41
   1  -3  -7  118.41    2.32
  -1  -3   7  135.58    3.01
   1   3  -7  125.43    3.38
   1   3  -7  121.73    3.31
   1  -3  -7  131.60    3.71
   1  -3  -7  125.72    2.88
   1   3  -7  124.79    3.22
  -1  -3   7  123.43    3.56
  -1   3   7  130.65    3.72
   3  -2   2  170.14    4.55
  -3  -2  -2  190.67    3.68
   3  -2   2  182.75    2.79
   3   2   2  166.77    4.71
   3  -2   2  186.79    4.74
   3   2   2  177.04    4.08
  -3   2  -2  184.09    4.67
   3   2   2  172.81    4.72
   2  -2   9 2604.66   11.91
   2   2   9 2661.06   16.26
  -2  -2  -9 2535.07   15.50
   2  -2   9 2532.80   16.66
  -2  -2  -9 2585.53   16.82
  -2  -2  -9 2683.21   17.79
  -2   2  -9 2550.55   11.83
   2   2   9 2569.34   17.11
   2  -2   9 2465.05   16.74
  -2   2  -9 2614.51   18.21
   3   0 -11   -0.10    0.74
   3   0 -11    0.14    0.54
  -3   0  11   -0.47    0.99
   3   0 -11    0.14    0.51
   3   0 -11    0.23    0.91
   0   3   8   32.88    1.92
   0   3  -8   32.65    1.99
   0  -3   8   30.98    2.00
   0  -3  -8   32.04    1.72
   0  -3  -8   34.75    1.62
   0   3  -8   29.42    2.05
   0  -3   8   32.68    1.82
   0  -3  -8   31.71    2.11
   0   3  -8   33.21    1.70
   0   3   8   32.30    2.04
   0  -3   8   31.48    1.67
   1  -1 -15  442.02    4.86
  -1  -1  15  479.76    7.14
  -1  -1  15  462.51    6.64
  -1   1  15  499.68    9.57
   1  -1 -15  475.69    7.58
   1  -1 -15  567.85    8.52
  -1   1  15  469.18    6.46
   1   1 -15  538.82    6.60
  -1   1  15  524.31    4.71
   3   2  -5  745.78    8.37
   3   2  -5  746.15    8.58
  -3  -2   5  683.26    8.28
  -3  -2   5  771.18    7.50
   3   2  -5  802.83    7.70
   3  -2  -5  741.73    8.18
   3  -2  -5  771.74    8.45
   3   2  -5  734.59    8.37
   0   2  13  435.00    6.15
   0   2 -13  428.71    6.09
   0  -2 -13  417.91    6.22
   0  -2  13  442.55    5.83
   0   2  13  443.30    6.25
   0  -2  13  404.39    6.15
   0  -2 -13  382.54    6.36
   0  -2 -13  438.94    6.55
   0  -2  13  461.09    6.25
   0   2 -13  436.82    7.72
   0   2 -13  441.44    5.88
   3   1 -10    0.34    0.69
  -3  -1  10    0.33    0.59
   3  -1 -10    0.29    0.94
   3   1 -10    0.75    0.67
  -3   1  10    0.02    1.28
   3  -1 -10    1.29    1.00
   3  -1 -10    0.14    0.81
  -3  -1  10    0.26    0.71
   3  -1 -10    0.38    0.69
   3   1 -10    0.44    0.76
   2   1  12  423.69    7.53
  -2  -1 -12  347.66    6.79
  -2  -1 -12  433.70    7.63
  -2  -1 -12  410.25    6.39
  -2   1 -12  448.27    4.92
  -2   1 -12  281.04    8.33
   2  -1  12  421.97    6.10
   2  -1  12  442.26    7.58
   2   1  12  413.98    7.35
   2  -1  12  589.26    9.73
  -1  -2 -12 1312.44   11.20
   1   2  12 1298.83   11.71
  -1   2 -12 1280.68   12.98
  -1  -2 -12 1298.70   11.71
   1   2  12 1270.41   11.51
   1  -2  12 1236.93   11.77
  -1   2 -12 1302.70    9.37
   1  -2  12 1219.56   10.59
  -1  -2 -12 1294.02   11.81
   1  -2  12 1341.51   10.13
  -1   0 -15   -1.01    1.59
   1   0  15    0.12    1.08
   1   0  15   -0.14    1.66
   1   0  15   -0.15    1.13
  -1   0 -15    1.38    1.56
  -1   0 -15    0.23    0.82
  -2  -3   1  160.09    3.90
   2   3  -1  147.39    4.23
   2  -3  -1  150.52    4.10
   2  -3  -1  153.89    1.95
   2  -3  -1  142.66    3.25
  -2  -3   1  145.14    4.23
   2   3  -1  163.28    3.97
   2   3  -1  156.75    3.44
   2  -3  -1  162.40    3.29
  -2  -3   1  156.78    3.93
   2   2 -11  236.03    4.96
   2   2 -11  250.56    3.95
   2   2 -11  252.05    4.53
   2  -2 -11  272.52    4.49
   2   2 -11  256.03    4.76
   2  -2 -11  242.04    4.41
  -2  -2  11  243.69    4.66
   2  -2 -11  207.00    5.17
  -2   2  11  246.21    4.28
  -2   2  11  245.39    4.21
  -2  -2  11  230.49    3.94
  -3   2  -3   25.32    2.13
   3  -2   3   25.03    2.19
   3   2   3   25.55    2.26
   3   2   3   24.30    1.63
   3   2   3   24.90    2.08
  -3  -2  -3   24.67    1.39
   3  -2   3   24.92    2.13
   3  -2   3   24.10    1.06
  -2  -3   0 1060.95   10.17
   2  -3   0 1061.85    8.74
   2  -3   0 1109.22    8.48
   2   3   0 1089.40    9.80
   2   3   0 1067.06   11.08
  -2  -3   0 1087.79   10.04
   0   0  16 1217.98    9.05
   0   0  16 1174.13   12.36
   2  -3  -2  519.26    7.31
  -2  -3   2  544.98    7.03
   2  -3  -2  549.89    3.96
   2   3  -2  532.83    7.71
  -2  -3   2  557.57    7.34
  -2  -3   2  523.06    7.70
   2   3  -2  548.10    6.12
  -2   3   2  476.10    7.57
   2  -3  -2  614.46    6.29
   2  -3   1  783.33    9.21
   2  -3   1  741.01    7.31
  -2  -3  -1  764.20    8.28
   2   3   1  775.86    9.66
  -2  -3  -1  792.89    8.96
   2   3   1  793.71    8.36
   2  -3   1  826.91    7.67
  -1  -3  -7 1218.02   11.69
  -1   3  -7 1229.82    8.43
  -1   3  -7 1254.73   12.10
  -1  -3  -7 1236.58    9.01
  -1   3  -7 1201.24    9.53
   1   3   7 1191.70    8.99
   1  -3   7 1147.31    9.54
  -1  -3  -7 1308.54   11.61
   1  -3   7 1113.95   10.62
   1   3   7 1187.84   10.57
  -1   3  -7 1193.43   10.92
   1  -3   7 1190.82    9.34
  -1   2  13  122.98    3.09
  -1   2  13  110.16    2.96
   1   2 -13  113.53    3.22
   1  -2 -13   96.68    3.77
   1  -2 -13  102.60    3.35
  -1  -2  13  107.72    3.28
  -1  -2  13  109.32    2.72
  -1  -2  13  103.72    3.15
   1   2 -13  107.88    3.75
   1   2 -13  110.41    2.85
   1  -2 -13  114.60    3.07
  -3   0  -9   -0.09    1.78
   3   0   9    0.41    1.88
  -3   0  -9   -0.05    1.60
  -3   0  -9   -0.20    0.78
  -2  -3   3    9.67    1.23
   2   3  -3    8.96    1.23
  -2  -3   3    7.38    1.42
   2   3  -3   10.03    1.16
   2  -3  -3    7.69    0.65
  -2   3   3    7.79    1.32
   2  -3  -3    6.41    1.31
   2   3  -3    8.06    1.34
  -2  -3   3    9.53    1.15
   2  -3  -3    8.00    1.18
   2  -3  -3    9.16    0.90
  -2   0 -13   -0.24    0.77
  -2   0 -13   -0.58    1.87
   2   0  13   -1.00    1.35
   2   0  13   -0.15    1.27
  -2   0 -13   -0.18    1.60
   2   0  13    0.07    1.75
  -2   0 -13    0.20    0.79
   3   2  -6  156.96    4.18
   3  -2  -6  148.94    3.49
  -3  -2   6  137.11    3.25
   3  -2  -6  133.08    3.80
   3   2  -6  142.52    3.86
  -3  -2   6  132.24    3.75
   3  -2  -6  145.30    3.72
   3   2  -6  145.56    3.84
   3   2  -6  148.16    3.44
  -1   0  16  457.72    3.32
  -1   0  16  549.06    3.67
   1   0 -16  786.39    8.40
   1   0 -16  721.55    9.83
  -1   0  16  616.36    9.18
  -3  -1  -8  427.26    7.80
   3   1   8  365.12    7.19
  -3  -1  -8  377.42    5.95
  -3  -1  -8  434.47    5.91
   3   1   8  367.14    7.27
   3   1   8  392.75    5.98
  -3  -1  -8  373.20    7.12
  -3   1  -8  377.95    4.80
   3  -1   8  371.78    3.96
   3  -1   8  380.10    7.38
   1   3  -8  195.09    4.24
   1  -3  -8  178.11    3.11
  -1  -3   8  206.43    3.80
   1  -3  -8  187.28    3.67
   1   3  -8  190.46    4.19
  -1  -3   8  192.26    4.34
   1  -3  -8  206.65    4.64
  -1  -3   8  183.85    4.35
   1   3  -8  181.21    4.24
   1   3  -8  193.71    4.25
  -1   3   8  192.23    4.46
   2  -3   2  128.41    3.94
  -2  -3  -2  124.64    3.58
  -2   3  -2  128.87    4.11
  -2  -3  -2  127.35    3.45
   2  -3   2  124.84    3.03
  -2   3  -2  147.33    3.56
   2  -3   2  140.42    3.37
   2   3   2  121.17    3.89
   2   3   2  137.32    3.74
   2   1 -14 2144.93   13.19
  -2  -1  14 2140.04   14.03
   2   1 -14 2088.15   15.15
  -2   1  14 2077.39   13.33
   2  -1 -14 2135.33   14.73
  -2   1  14 1724.23    7.45
   2  -1 -14 2184.74   16.01
  -2  -1  14 1134.34    5.29
   2  -1 -14 1863.71    7.45
   2   1 -14 1048.86    4.63
   3  -2   4  389.79    3.89
   3   2   4  399.71    6.11
  -3   2  -4  407.60    7.21
   3  -2   4  380.64    6.75
   3  -2   4  389.53    6.92
   3   2   4  379.64    6.93
  -3  -2  -4  385.96    5.07
   3   2   4  384.23    7.13
   2   3  -4    1.90    0.98
  -2   3   4    2.83    1.06
  -2  -3   4    2.38    0.79
   2  -3  -4    2.02    1.00
   2  -3  -4    1.97    0.67
  -2  -3   4    2.13    0.82
   2   3  -4    1.90    0.91
   2  -3  -4    2.35    0.53
  -2  -3   4    2.40    1.17
   2   3  -4    2.74    1.01
   2  -3  -4    2.07    1.08
   0   3   9  506.26    5.01
   0   3   9  544.74    7.78
   0   3  -9  513.57    7.16
   0  -3  -9  533.08    6.76
   0  -3   9  502.38    6.75
   0   3  -9  510.30    6.25
   0  -3  -9  539.92    5.80
   0  -3   9  475.24    6.69
   0   3  -9  503.71    6.61
   0  -3  -9  479.04    6.98
   0   3  -9  486.06    7.17
   0  -3   9  524.68    5.96
  -2  -2 -10  159.05    4.47
   2  -2  10  162.92    4.53
   2  -2  10  168.76    3.31
   2  -2  10  107.92    4.54
  -2  -2 -10  128.11    4.18
   2   2  10  173.07    4.41
   2  -2  10  161.97    4.63
  -2   2 -10  160.37    3.15
  -2   2 -10  164.98    4.95
  -2  -2 -10  194.57    5.43
   2   2  10  162.69    4.64
  -2  -2 -10  163.17    4.15
  -2   3  -3  485.96    6.47
   2   3   3  457.80    6.69
  -2  -3  -3  428.16    6.60
   2   3   3  425.01    7.18
   2  -3   3  446.41    5.93
  -2   3  -3  432.09    7.40
  -2  -3  -3  443.98    6.51
   2  -3   3  412.16    6.81
  -2  -3  -3  400.98    6.94
   2  -3   3  422.20    5.55
   2   0 -15   -0.19    0.89
   2   0 -15    0.16    1.04
   3   0 -12   91.04    1.83
   3   0 -12  105.82    3.03
   3   0 -12   89.38    3.18
   3   0 -12   99.89    1.84
  -3   0  12   98.27    3.64
   3   2  -7 2954.04   16.21
  -3  -2   7 2995.54   15.28
   3   2  -7 3096.67   15.35
  -3   2   7 2963.65   17.35
   3   2  -7 2952.99   17.12
   3  -2  -7 3022.97   17.87
   3  -2  -7 3060.81   15.67
   3  -2  -7 3065.99   16.40
   3   2  -7 3007.77   17.04
  -3  -1  11  554.67    7.29
   3  -1 -11  604.55    7.68
   3   1 -11  564.94    6.75
   3  -1 -11  630.19    5.69
   3   1 -11  563.25    7.78
   3   1 -11  580.30    5.29
   3   1 -11  584.78    6.70
   3  -1 -11  548.33    7.35
  -3   1  11  596.12   10.18
  -3  -1  11  545.28    5.50
   2  -3  -5   40.13    1.48
   2  -3  -5   41.00    1.87
   2  -3  -5   35.26    1.37
   2   3  -5   33.90    1.81
  -2   3   5   34.40    2.19
   2   3  -5   34.12    2.08
   2   3  -5   38.30    1.98
  -2  -3   5   32.84    2.15
  -2  -3   5   33.57    1.86
   2  -3  -5   33.93    2.07
  -2  -3   5   36.94    2.00
  -1   3  -8  646.13    8.74
  -1  -3  -8  644.60    7.88
   1  -3   8  630.09    7.13
   1   3   8  634.78    7.89
  -1   3  -8  621.34    6.86
   1  -3   8  615.28    8.04
   1  -3   8  672.67    7.44
  -1   3  -8  680.17    8.57
  -1  -3  -8  689.00    7.19
  -1   3  -8  658.04    6.37
   1   3   8  676.82    7.09
  -1  -3  -8  649.46    8.58
  -4   0   2  985.77    6.62
  -4   0   2 1021.16   11.48
  -4   0   2  800.19    7.24
   4   0  -2  717.02    9.75
   4   0  -2  724.61    9.37
   4   0  -2  782.05    7.31
   4   0  -2  676.90    4.36
   4   0  -1    0.02    1.61
  -4   0   1    0.09    0.41
  -4   0   1    0.38    0.64
   4   0  -1    0.23    0.75
  -4   0   1   -0.34    1.39
   4   0  -1   -0.22    1.02
   4   0  -1    0.15    0.25
  -1  -1 -15   -0.13    0.81
   1  -1  15    0.19    0.90
   1  -1  15    0.15    1.12
   1  -1  15    0.27    0.88
  -1   1 -15    0.22    0.63
  -1  -1 -15    0.22    1.14
   1   1  15   -0.06    1.35
  -1  -1 -15    0.22    1.03
  -1  -1 -15   -0.46    1.49
   1   1  15    0.41    1.47
   1   1  15    0.03    0.96
   1  -1  15    0.28    1.51
   3   2   5  171.34    4.12
   3  -2   5  160.29    4.69
   3   2   5  169.45    4.94
   3  -2   5  163.17    4.75
  -3  -2  -5  164.63    4.49
  -3  -2  -5  172.89    3.54
   3  -2   5  170.67    2.67
  -3  -2  -5  168.95    4.98
  -3   2  -5  168.59    4.86
   3   2   5  164.14    4.83
   3  -2   5  171.27    4.73
   2   2 -12  329.32    5.36
  -2   2  12  331.57    5.03
   2  -2 -12  330.10    6.71
   2   2 -12  335.23    4.55
  -2  -2  12  318.51    4.55
  -2  -2  12  345.56    5.72
   2  -2 -12  330.21    5.35
   2   2 -12  315.61    5.91
   2  -2 -12  358.17    5.05
   2   2 -12  330.72    5.31
  -2   2  12  328.52    4.97
  -4   0   3    0.25    0.56
   4   0  -3   -0.01    1.04
   4   0  -3    0.38    1.59
   4   0  -3    0.46    0.73
  -4   0   3   -0.16    0.73
  -4   0   3   -0.24    1.42
   4   0  -3    0.43    0.42
   0   1  16   54.28    2.17
   0  -1 -16   50.15    2.85
   0   1 -16   50.61    2.16
   0  -1  16   45.33    2.37
   0  -1  16   52.50    2.01
   0  -1  16   49.25    2.61
   0   1  16   50.39    2.62
   0   1  16   43.77    3.15
   0  -1 -16   38.53    2.11
   0  -1  16   51.61    2.69
   1  -3  -9 1377.85    9.08
   1   3  -9 1616.44   12.38
  -1   3   9 1504.56   12.27
  -1  -3   9 1457.90   11.57
   1  -3  -9 1513.24   10.57
   1   3  -9 1439.80   11.28
  -1   3   9 1535.56    8.24
   1   3  -9 1555.51   12.48
  -1  -3   9 1547.93   10.29
   1  -3  -9 1531.16   12.03
   1   3  -9 1504.06   11.75
  -1  -3   9 1543.51   12.05
   4   0   0  413.18    7.57
   4   0   0  450.87    5.46
  -4   0   0  467.00    5.70
   4   0   0  413.93    7.46
   2   3   4  323.52    6.42
   2  -3   4  329.28    4.95
  -2  -3  -4  323.02    5.90
  -2  -3  -4  320.07    5.49
   2  -3   4  322.99    5.30
  -2   3  -4  340.02    5.62
  -2   3  -4  319.64    6.46
   2   3   4  318.10    5.56
  -2  -3  -4  321.32    6.44
   2  -3   4  310.44    6.02
   0   2  14  387.50    5.88
   0  -2  14  408.88    6.50
   0  -2 -14  331.98    6.15
   0  -2 -14  371.70    6.23
   0   2 -14  359.22    7.18
   0   2 -14  372.74    5.52
   0  -2 -14  358.51    5.88
   0  -2  14  351.69    6.03
   0   2  14  364.05    5.74
   0  -2  14  370.70    5.36
  -1   2 -13  233.41    4.11
   1  -2  13  231.77    4.79
  -1  -2 -13  225.68    4.99
   1   2  13  232.17    5.10
  -1   2 -13  240.46    6.02
   1   2  13  243.54    5.41
   1  -2  13  252.97    4.67
  -1  -2 -13  239.63    5.41
  -1  -2 -13  242.82    4.98
   1  -2  13  226.22    5.32
  -3  -1  -9  123.38    3.51
  -3  -1  -9  122.14    3.32
  -3  -1  -9  135.99    4.60
   3   1   9  117.08    4.38
   3   1   9  131.07    3.66
  -3  -1  -9  124.75    4.36
   3  -1   9  120.91    4.42
  -3   1  -9  119.08    2.82
   3  -1   9  126.35    2.58
   4   0  -4    6.34    0.68
   4   0  -4    5.44    1.65
   4   0  -4    5.56    1.28
  -4   0   4    6.99    0.96
   4   0  -4    6.01    0.96
  -2   1 -13  260.03    3.95
   2   1  13  265.36    6.03
  -2  -1 -13  251.44    5.26
   2  -1  13  248.12    4.99
  -2  -1 -13  254.43    6.09
   2   1  13  250.07    6.01
   2  -1  13  240.94    6.43
   2  -1  13  248.90    5.98
   3   0  10  760.36   10.73
  -3   0 -10  749.38    7.98
  -3   0 -10  757.51   10.81
   1  -1 -16   -0.26    1.26
  -1  -1  16    0.01    1.19
  -1  -1  16    0.16    0.84
  -1   1  16   -0.24    0.63
   1  -1 -16   -0.17    1.24
   1  -1 -16    0.09    0.73
  -1  -1  16    0.12    0.69
   1   1 -16    0.23    0.76
  -1   1  16   -0.19    1.43
   1   1 -16   -0.61    1.42
  -1   1  16   -0.01    1.12
  -2   3   6  414.13    6.80
   2   3  -6  408.94    6.32
  -2  -3   6  431.63    6.32
   2   3  -6  442.50    5.93
   2  -3  -6  464.42    4.68
  -2  -3   6  390.84    6.24
   2   3  -6  434.06    6.17
   2  -3  -6  427.00    4.58
   2  -3  -6  446.08    6.79
   4   0   1   -0.29    1.20
   4   0   1    0.56    1.76
  -4   0  -1   -0.02    1.47
   4   0   1    0.22    0.71
  -4   0  -1    0.13    0.63
  -3  -2   8  101.23    2.99
  -3  -2   8   96.58    3.14
   3  -2  -8  108.08    3.20
   3   2  -8   97.21    3.32
   3   2  -8  100.01    3.26
   3  -2  -8   97.79    2.91
   3  -2  -8   91.61    3.31
  -3   2   8   96.41    3.22
   3   2  -8  108.44    3.09
   3   2  -8   95.59    2.91
  -1  -2  14  108.28    3.36
  -1  -2  14  104.07    2.67
   1  -2 -14   98.63    3.93
  -1  -2  14  111.54    3.48
   1   2 -14  101.48    3.83
   1   2 -14  113.89    2.96
  -1   2  14  111.00    2.92
   1  -2 -14  100.39    3.47
   1  -2 -14  107.76    3.00
  -1   2  14  102.63    2.95
   1   2 -14  113.34    3.26
   4   0  -5    0.22    0.76
   4   0  -5   -0.37    1.06
  -4   0   5   -0.14    0.82
  -4   0   5   -0.14    1.33
   4   0  -5    0.00    0.54
   0  -3 -10  101.84    3.49
   0   3 -10   94.76    3.53
   0  -3  10  100.74    2.87
   0  -3 -10   98.04    3.03
   0  -3 -10  102.21    2.90
   0   3 -10  101.95    3.33
   0  -3  10   92.62    3.08
   0   3 -10  100.52    2.89
   0   3 -10   95.33    2.95
   0   3  10   98.17    2.47
   0   3  10  101.81    3.47
   0  -3  10  101.14    3.17
  -1   0 -16  693.44    7.50
   1   0  16  627.02    9.40
  -1   0 -16  638.96    9.84
   1   0  16  702.12    8.94
   4   0   2 1826.83   10.90
   4   0   2 1728.65   16.08
  -2   0 -14  141.12    4.81
  -2   0 -14  171.27    5.39
   2   0  14  176.77    5.23
   2   0  14  197.21    5.33
   2   0  14  138.90    4.23
  -2   0 -14  164.35    4.25
  -2   0 -14  168.52    3.45
  -2  -3  -5  295.44    5.60
   2   3   5  314.39    6.55
  -2  -3  -5  297.02    6.18
   2  -3   5  301.42    4.67
   2  -3   5  300.01    6.02
   2  -3   5  316.52    5.41
   2   3   5  306.54    5.53
  -2   3  -5  304.14    6.23
  -2  -3  -5  293.25    5.21
   0   0  17   -0.36    1.21
   0   0  17   -1.17    1.07
   0   0 -17    0.18    0.86
   0   0 -17   -1.18    1.56
   0   0 -17    0.75    1.67
   3  -2   6  152.05    4.60
  -3   2  -6  154.90    4.75
  -3   2  -6  141.96    2.18
   3   2   6  144.78    4.69
  -3  -2  -6  143.78    3.21
   3  -2   6  126.94    4.95
   3   2   6  149.47    4.63
   3   2   6  156.73    3.97
   3  -2   6  151.99    4.69
  -3  -2  -6  151.07    4.53
  -3  -2  -6  134.76    4.58
   3  -2   6  149.90    2.52
   2   1 -15   84.57    2.87
   2  -1 -15   76.75    3.05
   2   1 -15   77.36    3.27
   2  -1 -15   93.30    3.56
  -2  -1  15   79.07    3.00
  -2   1  15   62.33    1.35
  -2   1  15   76.07    2.82
   2  -1 -15   60.05    1.37
   3  -1 -12   17.99    1.66
   3   1 -12   17.63    1.41
   3  -1 -12   20.07    1.14
   3   1 -12   18.14    1.06
  -3   1  12   16.57    2.24
   3   1 -12   18.55    1.77
   3   1 -12   15.86    1.39
   3  -1 -12   12.81    1.12
  -3  -1  12   16.65    1.52
   3  -1 -12   18.42    1.70
  -2   2 -11 1257.38   13.33
   2   2  11 1228.47   12.24
  -2  -2 -11 1356.03   13.91
  -2  -2 -11 1247.94   11.50
  -2  -2 -11 1270.42   12.48
  -2   2 -11 1216.32    8.56
   2   2  11 1171.18   12.46
   2  -2  11 1206.87   11.88
   2  -2  11 1288.08    9.31
   2  -2  11 1229.02   12.29
  -2  -2 -11 1239.14   12.61
   1   3   9  244.60    5.12
  -1   3  -9  257.64    4.10
  -1   3  -9  234.04    4.33
   1   3   9  258.31    4.73
  -1   3  -9  244.54    5.42
  -1  -3  -9  225.09    5.27
   1  -3   9  235.43    4.59
   1  -3   9  232.87    5.08
  -1  -3  -9  264.32    4.71
   1  -3   9  251.06    4.63
   1   3   9  257.94    5.78
  -1  -3  -9  247.34    4.98
  -1   3  -9  247.37    5.43
  -1   0  17   -0.76    0.46
   1   0 -17   -0.55    0.98
  -1   0  17   -0.51    0.47
  -1   0  17   -1.31    1.33
   1   0 -17   -0.76    1.56
   3   0 -13   -0.08    0.80
   3   0 -13    0.06    0.26
   3   0 -13   -0.06    0.28
   3   0 -13    0.05    0.98
  -3   0  13   -0.04    0.99
   2   3  -7    9.74    1.24
   2   3  -7    8.93    1.25
   2  -3  -7   10.29    0.92
  -2   3   7    9.88    1.37
  -2  -3   7    8.43    1.38
   2   3  -7    9.51    1.26
   2  -3  -7    9.40    0.97
   2  -3  -7    9.65    1.35
  -2  -3   7   10.90    1.19
   4   0  -6 1404.72   12.37
  -4   0   6 1395.25   10.69
   4   0  -6 1334.23    9.94
   4   0  -6 1336.52    7.97
   1   3 -10  289.97    5.57
  -1  -3  10  303.63    5.49
   1  -3 -10  295.00    4.91
  -1  -3  10  284.33    5.27
   1   3 -10  302.89    5.43
   1  -3 -10  293.14    5.43
  -1   3  10  292.72    5.55
   1  -3 -10  283.85    4.52
  -1  -3  10  307.70    4.88
   1   3 -10  294.45    5.27
  -1   3  10  295.43    3.83
   1   3 -10  301.05    5.38
   4  -1  -2 1187.33    5.62
  -4  -1   2 1262.40   10.84
   4  -1  -2 1106.24   12.14
   4  -1  -2 1209.15   13.57
   4   1  -2 1281.34    7.89
   4  -1  -2 1214.35   11.62
  -4  -1   2 1144.07   12.12
   4   1  -2 1148.72   12.21
   4   1  -2 1187.10   10.24
   4  -1  -2 1322.66    7.95
  -4  -1   2 1255.43    7.73
   4  -1  -1  954.84   10.41
  -4  -1   1  929.29    6.13
   4   1  -1  926.66   11.11
   4  -1  -1  946.83    6.20
  -4  -1   1  955.77    9.37
   4   1  -1  971.55    9.31
  -4  -1   1  931.95   11.14
   4  -1  -1  982.36   12.12
   4   0   3    0.71    1.79
   4   0   3    0.23    0.77
   4   0   3   -0.04    1.19
  -4   0  -3    0.22    0.70
  -4   0  -3   -0.32    1.76
   4  -1  -3   45.08    2.39
   4  -1  -3   42.46    2.84
  -4  -1   3   47.79    1.64
  -4  -1   3   46.30    2.69
   4  -1  -3   45.79    1.57
   4   1  -3   46.54    2.19
   4   1  -3   48.22    1.67
  -4  -1   3   47.82    2.18
   4   1  -3   44.69    2.67
   4  -1  -3   46.43    2.87
   4  -1  -3   47.91    1.32
  -3   2   9  675.94    8.10
   3  -2  -9  707.75    7.72
   3  -2  -9  747.41    9.50
   3  -2  -9  751.64    7.83
  -3  -2   9  625.53    7.34
   3   2  -9  725.11    8.53
  -3  -2   9  696.46    7.80
   3   2  -9  656.40    8.19
   3   2  -9  706.01    7.59
   3   2  -9  696.45    7.58
  -4  -1   0  208.10    5.43
   4   1   0  201.61    5.41
  -4   1   0  215.96    2.91
   4  -1   0  193.00    5.40
  -4  -1   0  195.10    2.67
   4  -1   0  218.20    3.06
   4   1   0  207.09    4.37
  -4  -1   0  208.13    4.49
   4  -1   0  215.82    5.89
   2   0 -16  698.35    8.24
   2   0 -16  659.60    8.99
   2   2 -13   21.87    1.30
   2   2 -13   17.19    1.76
   2  -2 -13   17.25    2.00
  -2  -2  13   19.06    1.76
  -2   2  13   17.67    1.35
  -2   2  13   18.17    1.54
   2  -2 -13   19.83    1.34
   2   2 -13   20.43    1.56
   2   2 -13   18.84    1.52
  -2  -2  13   18.56    1.33
   2  -2 -13   17.54    1.59
  -4  -1   4  267.90    3.92
   4  -1  -4  263.41    3.60
   4   1  -4  255.34    4.92
   4  -1  -4  258.80    3.21
  -4  -1   4  269.56    4.96
   4   1  -4  261.98    5.67
   4  -1  -4  275.48    6.25
  -4  -1   4  258.32    5.69
   4  -1  -4  261.30    5.28
   4   1  -4  280.30    3.96
   4  -1  -4  248.01    5.86
   2  -3   6  289.51    5.33
   2   3   6  289.66    6.40
  -2  -3  -6  298.77    5.29
  -2  -3  -6  295.69    5.73
  -2   3  -6  280.45    6.16
  -2   3  -6  295.07    3.64
  -2  -3  -6  279.12    6.05
   2   3   6  289.39    5.57
  -2   3  -6  307.69    5.87
   2  -3   6  301.93    4.78
  -3  -1 -10   14.83    1.41
  -3  -1 -10   15.48    2.08
  -3   1 -10   12.69    0.81
  -3  -1 -10   15.13    2.03
   3  -1  10   13.18    1.08
  -3  -1 -10   16.20    1.56
   3  -1  10   14.56    2.24
   3   1  10   14.49    2.27
  -3   1 -10   14.79    1.20
  -4   1  -1  193.54    2.89
  -4  -1  -1  181.28    4.24
   4   1   1  164.94    5.01
   4   1   1  177.51    3.98
   4  -1   1  190.01    2.86
  -4  -1  -1  168.73    2.39
   4  -1   1  189.52    5.60
   4  -1   1  165.00    5.14
  -4  -1  -1  169.21    5.09
   4   0  -7   -0.23    0.96
  -4   0   7   -0.68    1.42
   4   0  -7   -0.18    0.79
  -4   0   7   -0.39    0.97
   4   0  -7   -0.18    0.67
   4   0  -7    0.37    1.17
  -3   0 -11   -0.57    1.64
   3   0  11    0.37    1.91
  -3   0 -11   -0.20    1.89
  -3   0 -11    0.18    0.78
  -3   0 -11   -0.47    0.61
  -3  -2  -7  444.08    8.18
   3   2   7  434.64    6.56
   3   2   7  429.24    8.13
   3   2   7  418.81    7.65
   3  -2   7  454.50    4.47
   3  -2   7  432.77    7.72
  -3  -2  -7  422.71    7.44
  -3   2  -7  431.57    4.24
  -3   2  -7  443.97    8.07
   3  -2   7  431.25    7.57
  -2   3   8   38.45    2.23
   2  -3  -8   38.60    1.64
   2  -3  -8   37.63    2.16
   2   3  -8   36.65    2.05
   2  -3  -8   37.21    1.57
   2   3  -8   34.52    1.96
   2  -3  -8   37.32    3.04
   2   3  -8   39.56    2.08
  -2  -3   8   32.82    2.11
   4  -1  -5  218.76    5.40
  -4  -1   5  238.85    3.84
   4   1  -5  227.87    4.55
  -4  -1   5  235.63    4.61
   4  -1  -5  250.71    3.67
   4  -1  -5  227.32    3.21
   4   1  -5  241.30    5.39
   4  -1  -5  267.56    6.05
  -4  -1   5  244.72    5.42
   4  -1  -5  240.94    5.05
   4   1  -5  257.58    3.95
   4   0   4  383.42    7.76
   4   0   4  364.47    7.53
  -4   0  -4  400.22    7.75
  -4   0  -4  427.32    5.83
   4   0   4  414.04    5.42
   0  -3 -11   19.02    1.89
   0   3 -11   18.23    1.68
   0  -3  11   18.60    1.62
   0   3 -11   18.18    1.38
   0   3 -11   19.04    2.02
   0  -3  11   18.48    1.56
   0  -3  11   18.45    1.46
   0  -3 -11   19.97    1.55
   0  -3 -11   19.30    1.67
   0   3  11   19.22    1.37
   0   3  11   19.89    1.74
   0  -3 -11   17.40    2.43
   0   3 -11   18.39    1.45
  -1   1 -16    0.17    0.69
   1  -1  16    0.30    0.96
  -1  -1 -16   -0.09    1.42
   1   1  16    0.36    1.41
  -1  -1 -16    0.32    1.23
   1   1  16    0.12    1.39
   1  -1  16    0.49    1.03
  -1  -1 -16    0.22    1.20
  -1  -1 -16   -0.09    0.78
   1   1  16    0.54    1.03
   1  -1  16   -0.04    1.14
   1  -1  16   -0.14    1.56
  -1  -2 -14  172.57    4.85
  -1   2 -14  171.07    3.64
   1  -2  14  164.58    3.89
  -1  -2 -14  173.21    4.36
   1   2  14  161.45    4.54
  -1  -2 -14  161.45    5.10
   1  -2  14  160.22    4.10
   1   2  14  156.97    4.29
  -1   2 -14  163.14    5.16
   1  -2  14  161.11    4.65
   0   2  15 1590.37   11.88
   0  -2 -15 1539.50   12.33
   0  -2  15 1445.95   12.43
   0  -2 -15 1541.62   13.03
   0  -2 -15 1406.19   12.97
   0  -2  15 1541.41   12.23
   0   2  15 1492.95   11.83
   0   2 -15 1539.91   11.37
   0  -2  15 1487.27   10.71
   0   2 -15 1564.59   15.45
   4   1   2    3.62    1.00
  -4  -1  -2    3.62    1.00
  -4   1  -2    4.42    0.70
  -4   1  -2    6.57    3.16
   4  -1   2    4.17    0.72
   4  -1   2    4.38    1.84
  -4  -1  -2    3.35    1.44
   4   1   2    3.47    1.37
   4  -1   2    2.30    1.46
  -4  -1  -2    3.15    0.53
   2   1  14  195.64    5.43
   2  -1  14  165.02    5.61
  -2   1 -14  201.28    3.57
  -2  -1 -14  205.11    5.59
   2  -1  14  217.29    5.85
   2   1  14  214.35    5.54
   2  -1  14  196.35    4.66
  -2  -1 -14  196.27    4.80
  -2  -1 -14  178.10    5.20
   0   1  17   76.00    4.13
   0  -1  17   82.78    3.32
   0  -1 -17   86.11    3.70
   0  -1  17   87.22    2.57
   0   1 -17   85.14    2.82
   0   1  17   89.28    2.77
   0   1  17   86.08    3.31
   0  -1  17   76.88    3.01
   0  -1 -17   68.57    2.77
   0  -1 -17   85.04    3.70
   0  -1  17   85.60    3.54
   1  -3  10  104.24    3.08
  -1  -3 -10   99.37    3.69
  -1  -3 -10   96.72    3.21
   1   3  10  102.94    3.21
  -1   3 -10  100.55    2.95
   1  -3  10   94.72    3.20
   1   3  10  103.56    3.81
  -1   3 -10  102.83    3.83
   1  -3  10   94.13    3.35
   1   3  10   99.67    3.45
  -1   3 -10   99.02    3.59
  -1   3 -10  102.43    2.67
  -1  -3 -10  110.83    3.39
   1  -2 -15  107.10    3.76
  -1   2  15  100.06    3.02
   1   2 -15  106.59    3.21
  -1   2  15  111.28    2.92
   1  -2 -15  105.09    4.23
  -1  -2  15   98.77    3.29
  -1  -2  15  103.57    2.66
   1  -2 -15  103.93    2.99
  -1  -2  15  111.33    3.52
   1   2 -15   96.38    3.97
   1   2 -15   96.93    2.79
   1   1 -17  429.50    6.29
  -1   1  17  342.53    8.40
   1   1 -17  415.22    8.03
  -1   1  17  446.25    4.57
   1  -1 -17  373.36    7.19
  -1  -1  17  414.33    7.62
  -1   1  17  392.20    6.27
  -1  -1  17  335.07    4.50
  -1  -1  17  377.02    6.33
   1  -1 -17  460.60    7.96
   1  -1 -17  321.13    4.46
   3   1 -13  515.45    6.72
   3  -1 -13  528.82    4.60
   3   1 -13  473.29    6.28
  -3   1  13  472.52    9.36
   3   1 -13  466.39    4.23
  -3  -1  13  490.44    7.14
  -3  -1  13  475.08    7.30
   3  -1 -13  482.86    7.17
   3  -1 -13  533.15    7.41
   3   1 -13  503.59    7.69
   3  -2 -10  153.21    3.82
  -3  -2  10  139.52    3.51
   3  -2 -10  161.08    3.64
   3   2 -10  147.66    3.44
  -3  -2  10  150.79    3.81
   3   2 -10  147.51    3.92
  -3   2  10  151.48    3.78
   3   2 -10  146.04    4.18
   3  -2 -10  167.29    4.72
   3   2 -10  154.34    3.68
   4  -1  -6  520.79    7.13
  -4  -1   6  520.45    7.85
   4   1  -6  524.76    7.49
   4  -1  -6  501.88    5.25
   4  -1  -6  486.55    4.96
  -4  -1   6  490.02    5.74
   4   1  -6  499.97    6.83
   4   1  -6  531.98    5.70
   4   0  -8  348.71    5.89
  -4   0   8  348.24    5.92
   4   0  -8  341.03    5.10
   4   0  -8  341.41    4.44
   1   3 -11 1190.42   10.47
   1  -3 -11 1274.35   10.48
   1   3 -11 1264.04   10.86
  -1  -3  11 1343.90   10.42
   1   3 -11 1288.35   10.90
  -1  -3  11 1257.01   11.21
  -1  -3  11 1264.92   11.04
   1  -3 -11 1362.28   11.86
   1  -3 -11 1202.64    9.71
   1   3 -11 1218.83   11.61
  -1   3  11 1283.60   11.44
  -1   3  11 1306.11    8.37
   2  -2  12 1334.52   10.04
   2   2  12 1262.90   12.74
  -2  -2 -12 1115.27   12.39
   2  -2  12 1265.45   15.05
  -2  -2 -12 1349.03   14.35
  -2   2 -12 1287.20   14.08
  -2   2 -12 1224.40    8.79
   2   2  12 1162.43   12.63
   2  -2  12 1301.92   12.77
  -2  -2 -12 1265.25   11.87
  -2  -2 -12 1322.31   13.46
   2  -2  12 1288.66   13.06
   2   3   7   75.95    3.49
   2  -3   7   75.76    2.47
  -2  -3  -7   79.04    3.03
  -2   3  -7   75.97    1.95
  -2   3  -7   77.38    3.29
  -2  -3  -7   68.06    3.30
  -2   3  -7   71.95    3.26
   2  -3   7   73.26    3.02
  -2   3  -7   70.57    2.37
   2   3   7   67.13    2.74
  -2  -3  -7   76.65    3.09
   2   3   7   74.77    3.14
  -4  -1  -3  548.24    9.17
   4   1   3  561.28    7.01
  -4   1  -3  539.09    9.10
   4  -1   3  530.76    8.87
  -4  -1  -3  549.20    7.40
  -4  -1  -3  554.56    4.25
  -4   1  -3  600.14    5.54
   4  -1   3  611.92   10.18
   3   0 -14  105.15    3.58
  -3   0  14  106.82    4.03
  -4   0  -5   -0.34    1.60
   4   0   5    0.67    1.83
   4   0   5   -0.26    1.26
  -4   0  -5   -0.09    0.76
   4   0   5    0.33    0.80
  -2   0 -15    0.18    0.71
   2   0  15    0.57    1.80
   2   0  15   -0.02    1.12
  -2   0 -15   -0.03    0.80
  -2   0 -15    0.68    1.56
  -2   0 -15   -0.42    1.57
   2   0  15   -0.33    1.18
  -2   1  16  293.07    2.61
   2   1 -16  474.31    7.89
  -2  -1  16  459.44    6.94
   2  -1 -16  450.26    7.35
   2  -1 -16  256.81    2.66
   2   1 -16  482.60    6.67
   2  -1 -16  510.40    8.07
  -2   1  16  448.79    6.59
  -1   0 -17   -0.87    1.65
   1   0  17   -0.24    1.06
  -1   0 -17   -0.02    0.87
   1   0  17    0.39    1.20
  -1   0 -17   -0.73    1.53
   2   3  -9   63.81    2.57
   2   3  -9   64.29    2.68
  -2  -3   9   63.30    2.77
   2  -3  -9   66.63    2.15
   2  -3  -9   62.45    3.60
   2  -3  -9   68.75    2.22
  -2   3   9   66.11    2.81
   2   3  -9   74.18    2.88
   2  -3  -9   68.88    2.78
  -3  -2  -8  211.53    5.46
   3   2   8  225.53    4.97
  -3   2  -8  216.18    3.31
   3  -2   8  232.82    3.37
   3   2   8  217.83    5.89
   3   2   8  211.45    5.62
   3  -2   8  216.51    5.69
  -3   2  -8  228.97    3.42
  -3   2  -8  226.36    6.14
  -4   1   7   31.25    2.43
   4  -1  -7   24.38    1.33
   4  -1  -7   27.35    2.12
   4   1  -7   25.17    1.97
   4  -1  -7   24.21    1.93
  -4  -1   7   23.01    1.42
  -4  -1   7   22.10    2.03
   4   1  -7   26.41    1.48
   4  -1  -7   26.85    1.90
   4   1  -7   25.19    1.75
   4  -1  -7   23.24    1.33
   0   0  18 1511.72   10.64
   0   0  18 1470.90   15.66
   0   0 -18 1484.68   15.27
  -2   2  14  145.36    3.59
  -2   2  14  141.82    3.25
  -2  -2  14  146.72    3.91
   2   2 -14  149.87    3.85
  -2  -2  14  138.36    3.02
   2  -2 -14  145.28    3.97
   2   2 -14  149.83    2.99
   2   2 -14  142.34    4.37
  -3  -1 -11   34.79    1.93
   3  -1  11   34.88    1.68
  -3   1 -11   36.44    1.82
  -3   1 -11   35.27    1.32
   3   1  11   34.07    2.86
  -3  -1 -11   37.84    2.90
   3  -1  11   35.86    2.94
  -3  -1 -11   36.58    2.73
  -3  -1 -11   34.18    2.06
  -3   1 -11   25.91    4.00
   1   0 -18 3385.99   22.64
  -1   0  18 3002.39    9.55
  -1   0  18 3559.45   23.27
  -1   0  18 3062.14    9.60
  -4   1  -4  395.82    4.57
  -4   1  -4  371.11    7.74
   4   1   4  387.52    5.91
   4   1   4  351.76    7.46
  -4  -1  -4  387.24    6.32
  -4  -1  -4  385.26    3.58
   4  -1   4  363.75    7.55
   4   0  -9   -0.01    1.36
  -4   0   9   -1.62    2.88
   4   0  -9   -0.15    0.84
   4   0  -9   -0.06    0.99
  -4   0   9   -0.73    1.17
   4   0  -9   -0.14    1.06
  -3   0 -12 1045.41    7.33
  -3   0 -12 1053.03    9.94
   0  -3  12  348.63    5.59
   0   3 -12  326.31    5.42
   0   3 -12  355.12    5.37
   0  -3  12  371.35    6.14
   0   3 -12  362.20    6.61
   0  -3 -12  364.24    5.79
   0   3 -12  358.25    7.09
   0   3  12  343.10    4.89
   0   3  12  363.43    6.46
   0  -3 -12  390.64    6.64
   0  -3 -12  368.92    6.11
   0  -3  12  344.40    5.81
   2   0 -17   -0.14    1.21
   2   0 -17   -0.29    0.96
   0  -4   0   86.94    2.77
   0  -4   0   86.44    3.13
   0   4   0   87.44    2.89
   0   4   0   83.94    3.42
   0  -4   1   37.37    2.11
   0  -4  -1   36.07    2.06
   0   4   1   35.54    2.36
   0  -4   1   37.51    1.88
   0   4   1   37.48    1.94
   0   4  -1   36.79    2.41
   0   4  -1   40.96    2.12
   0  -4  -1   35.92    1.88
   3   2 -11   10.60    1.17
   3  -2 -11   11.03    1.60
   3   2 -11   10.78    1.61
  -3   2  11   11.22    1.30
   3  -2 -11   10.15    1.42
   3   2 -11   13.49    1.45
  -3  -2  11   12.02    1.36
   3  -2 -11   12.49    1.32
  -3  -2  11   10.09    1.31
   2  -3   8  344.74    6.29
  -2  -3  -8  334.49    5.91
  -2   3  -8  327.45    5.00
  -2   3  -8  325.71    4.07
  -2  -3  -8  317.04    6.08
  -2   3  -8  335.37    6.61
   2   3   8  324.30    6.14
  -2   3  -8  330.67    6.74
  -2  -3  -8  307.16    6.48
   2  -3   8  328.63    5.02
   4   0   6  677.48    7.42
  -4   0  -6  665.74    7.62
   1  -3  11   -0.30    0.69
  -1   3 -11    0.31    0.76
   1  -3  11    0.30    1.09
  -1  -3 -11    0.22    1.30
   1   3  11    0.41    1.27
  -1  -3 -11    0.01    0.77
  -1   3 -11    0.26    1.43
  -1   3 -11    0.14    0.61
   1  -3  11    0.28    1.25
   1   3  11    0.21    1.07
  -1  -3 -11    0.28    1.19
  -1   3 -11    0.17    0.96
   0   4   2 1392.88   13.36
   0  -4  -2 1440.33   12.41
   0  -4   2 1412.08   10.59
   0  -4   2 1485.36   12.66
   0   4   2 1432.89   11.13
   0   4  -2 1402.08   13.44
   0   4  -2 1495.32   11.54
   0  -4  -2 1491.56   11.84
  -4  -1   8  121.62    3.94
   4  -1  -8  114.18    2.78
   4   1  -8  117.85    3.43
   4   1  -8  123.59    2.97
   4  -1  -8  117.90    3.69
  -4  -1   8  112.34    3.00
   4  -1  -8  114.43    2.64
  -4   1   8  108.78    3.94
   4  -1  -8  136.32    3.65
   4  -1  -8  129.18    4.00
   4   1  -8  124.52    3.59
   4   1  -8  113.92    3.84
  -1   2 -15   14.48    1.30
  -1  -2 -15   12.18    1.78
  -1   2 -15   13.32    2.11
  -1  -2 -15   15.22    2.05
  -1  -2 -15   14.56    1.56
   1   2  15   13.59    1.60
  -1  -2 -15   11.69    1.81
   1  -2  15   10.47    1.90
   1   2  15   13.92    1.90
   1  -2  15   14.47    1.56
   1  -2  15   16.02    2.06
   1  -2  15   13.59    1.34
   1  -3 -12  726.33    8.69
   1  -3 -12  664.75    7.77
   1  -3 -12  655.14    7.53
  -1   3  12  704.72    8.55
  -1  -3  12  697.94    8.40
   1   3 -12  647.99    7.83
  -1   3  12  673.49    6.29
  -1  -3  12  687.95    7.63
   1   3 -12  712.37    8.26
   1   3 -12  660.67    9.12
  -1  -3  12  652.40    7.78
   3  -1 -14 1279.76   11.61
   3  -1 -14 1219.68    6.55
  -3  -1  14  652.96    5.45
   3   1 -14 1173.05    9.96
   3   1 -14 1048.79    5.56
   3  -1 -14  785.75    6.33
   3   1 -14 1266.69   10.81
   3  -1 -14 1191.69   11.38
   3   1 -14 1198.66   11.79
  -3   1  14 1150.63   10.55
  -3  -1  14 1219.32   12.02
  -3   1  14 1050.53   14.26
   0  -2 -16  251.92    5.88
   0  -2 -16  263.42    5.57
   0  -2  16  265.43    4.66
   0  -2 -16  255.33    5.19
   0  -2  16  275.41    5.76
   0   2 -16  264.54    4.89
   0  -2  16  254.34    5.16
   0   2  16  271.38    5.36
   0   2  16  274.28    5.11
   0   2 -16  275.06    6.84
   2   3 -10 1049.87    9.93
   2  -3 -10 1092.78    8.70
   2  -3 -10 1114.08    8.72
  -2  -3  10 1158.15   10.06
   2   3 -10 1080.58   10.54
  -2   3  10 1087.04   10.71
  -2  -3  10 1064.36   10.36
   2  -3 -10 1016.09   13.13
   2  -3 -10 1185.90   10.79
  -4  -1  -5    4.25    1.04
   4   1   5    3.62    1.50
   4  -1   5    3.80    2.02
   4   1   5    4.40    1.07
   4  -1   5    3.17    1.61
  -4  -1  -5    3.71    1.65
  -4   1  -5    3.66    1.66
  -4  -1  -5    3.86    0.56
  -4   1  -5    4.02    0.80
  -2  -1 -15   52.27    3.15
   2  -1  15   45.08    2.46
  -2  -1 -15   46.53    2.60
   2   1  15   50.83    3.02
  -2  -1 -15   44.17    2.44
   2  -1  15   43.40    3.21
   2   1  15   48.55    3.17
  -2  -1 -15   50.04    3.15
  -2   1 -15   48.80    1.93
   0  -4   3  258.14    5.34
   0   4   3  233.05    5.62
   0   4   3  246.31    4.66
   0   4  -3  265.11    4.89
   0  -4  -3  239.74    5.19
   0   4  -3  247.69    5.74
   0  -4   3  254.23    4.51
   0  -4  -3  236.18    4.63
  -3  -3   1   82.80    2.98
   3  -3  -1   72.12    2.38
  -3  -3   1   60.85    3.19
   3  -3  -1   73.33    3.24
  -3  -3   1   79.50    3.13
  -3   3   1   69.01    3.28
   3   3  -1   72.28    3.29
   3  -3  -1   84.83    3.29
   3   3  -1   76.04    3.34
   1   1  17    1.70    1.20
   1  -1  17    2.23    1.19
  -1   1 -17    2.14    0.82
  -1  -1 -17    2.07    1.61
   1  -1  17    1.72    1.22
   1   1  17    1.74    1.49
  -1  -1 -17    2.02    1.26
   1  -1  17    2.35    1.15
   1   1  17    2.23    1.62
  -1  -1 -17    2.06    1.43
   3  -3  -2  993.29   10.82
   3   3  -2  964.71   11.04
  -3   3   2  959.97   11.30
   3  -3  -2 1087.01   10.38
   3   3  -2 1035.94   11.11
  -3  -3   2 1038.46    9.86
  -3  -3   2 1036.87   10.77
  -3  -3   2  945.64   10.98
   3   2   9   60.64    3.37
  -3   2  -9   63.51    3.52
  -3   2  -9   58.47    1.79
   3  -2   9   61.99    3.44
   3   2   9   55.65    3.23
   3  -2   9   63.85    1.88
  -3   2  -9   57.31    1.90
  -3  -2  -9   58.59    3.16
   3  -3   0  145.02    3.24
   3  -3   0  154.53    4.18
  -3   3   0  131.45    4.36
  -3  -3   0  131.24    4.36
   3   3   0  147.10    4.42
  -3  -3   0  146.55    4.22
   3   3   0  150.94    4.68
  -3  -3   0  148.25    3.81
   3  -3   0  141.78    4.35
   2  -2  13  597.59   10.92
  -2  -2 -13  599.76    9.07
   2   2  13  546.25    8.85
  -2   2 -13  568.08    6.20
   2  -2  13  587.93    9.09
  -2  -2 -13  522.40    8.84
  -2   2 -13  584.78    9.74
  -2  -2 -13  527.78    8.83
   2   2  13  559.73    8.65
  -2  -2 -13  565.97    7.99
   2  -2  13  560.31    8.57
   2  -2  13  574.41    6.74
  -1  -2  16   41.42    2.28
  -1   2  16   39.42    2.13
  -1  -2  16   40.54    1.77
   1   2 -16   41.29    2.86
   1   2 -16   39.66    1.92
   1  -2 -16   42.12    2.10
  -1  -2  16   39.40    2.34
  -1   2  16   43.68    1.97
   1  -2 -16   41.13    2.70
   3   3  -3    8.19    1.17
   3  -3  -3    4.69    1.48
   3  -3  -3    3.68    1.36
  -3  -3   3    3.11    1.39
   3   3  -3    3.86    1.24
  -3  -3   3    7.88    1.33
   3   3  -3    6.12    1.67
  -3  -3   3    7.85    1.19
  -3   3   3    3.12    1.28
   3   3  -3    6.02    1.34
  -3   0  15    0.04    1.05
   3   0 -15    0.88    1.11
   3   0 -15   -0.12    0.85
  -4   0  10 4942.39   24.15
   4   0 -10 4937.25   23.94
   4   0 -10 4986.90   18.42
   4   0 -10 4971.52   19.71
   0  -1  18   48.90    2.92
   0   1  18   49.53    2.70
   0  -1  18   41.38    2.27
   0   1 -18   52.61    2.34
   0  -1 -18   51.81    3.14
   0  -1 -18   39.41    2.28
   0   1  18   53.28    2.28
   0   1  18   43.01    3.34
   0  -1  18   52.33    2.10
   3  -3   1 1062.55   10.59
  -3  -3  -1 1080.29   10.15
   3   3   1 1053.31   12.17
  -3  -3  -1 1070.83   11.34
   3   3   1 1051.66   11.24
   0  -4   4  686.85    7.22
   0  -4  -4  696.91    8.49
   0   4  -4  692.30    9.30
   0   4  -4  675.21    6.07
   0   4  -4  712.18    7.85
   0  -4   4  688.85    8.53
   0  -4  -4  693.38    8.06
   0   4   4  722.91    8.05
  -1   1  18    2.80    1.68
  -1  -1  18    4.29    1.36
   1  -1 -18    3.61    1.58
   1   1 -18    3.14    1.65
  -1  -1  18    3.24    0.77
  -1   1  18    4.26    1.37
  -1   1  18    4.85    0.84
   1  -1 -18    2.43    0.94
  -3  -3   4  285.84    5.70
   3   3  -4  286.21    5.30
   3   3  -4  267.35    5.21
   3   3  -4  262.94    5.83
  -3  -3   4  272.49    5.13
   3  -3  -4  285.68    5.35
  -3   3   4  269.45    6.03
  -3  -3   4  253.84    5.55
   3  -3  -4  272.36    5.75
  -1   4   0  326.46    4.77
   1  -4   0  329.85    4.70
   1   4   0  305.59    5.68
  -1   4   0  295.28    6.35
   1  -4   0  295.03    5.43
   1   4   0  316.15    3.18
  -1  -4   0  312.40    5.88
  -1  -4   0  303.59    5.49
   1   4   0  302.23    6.41
   1   4  -1   74.74    1.76
   1   4  -1   70.14    2.89
   1  -4  -1   70.91    2.80
   1   4  -1   64.88    3.04
  -1  -4   1   72.80    2.99
  -1   4   1   66.53    2.23
  -1  -4   1   66.93    2.67
   1  -4  -1   66.53    2.18
   4   1  -9  115.10    3.42
   4  -1  -9  120.42    2.79
   4  -1  -9  119.88    3.80
   4  -1  -9  110.93    2.85
   4   1  -9  120.15    4.05
  -4   1   9  131.38    4.74
   4   1  -9  122.90    3.12
   4  -1  -9  139.82    3.66
   4   1  -9  125.11    3.48
  -4  -1   9  113.61    3.24
  -4  -1   9  127.10    3.85
   4  -1  -9  132.39    3.95
   4   0   7   -0.54    1.29
  -4   0  -7   -0.14    1.58
  -4   0  -7    0.37    0.78
  -1  -4  -1    2.07    0.90
   1   4   1    2.15    1.16
   1  -4   1    3.24    0.77
   1   4   1    2.49    0.53
  -1   4  -1    3.86    0.91
   1   4   1    2.08    0.64
  -1   4  -1    1.70    1.09
  -1  -4  -1    1.98    0.93
   1   4   1    1.61    0.96
   1  -4   1    4.31    1.04
  -3  -1 -12  199.05    5.74
  -3   1 -12  197.78    4.17
  -3  -1 -12  187.68    4.64
  -3  -1 -12  208.12    4.51
   3  -1  12  189.37    3.77
  -3   1 -12  186.94    3.02
   1   4  -2  392.83    6.44
  -1  -4   2  394.44    6.63
  -1  -4   2  368.89    5.97
   1   4  -2  397.65    4.17
   1  -4  -2  371.08    6.17
   1   4  -2  364.74    6.80
   1  -4  -2  376.58    5.07
  -1   4   2  395.43    5.31
  -2   1  17   44.24    2.34
   2   1 -17   47.63    2.87
   2  -1 -17   47.87    2.80
   3  -3   2 1412.78   12.54
  -3  -3  -2 1458.48   11.90
   3   3   2 1435.78   13.59
   3   3   2 1413.53   14.19
  -3  -3  -2 1459.82   13.38
  -2  -3  -9    0.99    0.98
  -2  -3  -9    0.73    1.29
  -2   3  -9    0.75    0.59
  -2   3  -9    1.11    1.56
   2   3   9    1.13    1.51
   2  -3   9    0.93    1.56
  -2   3  -9    0.87    0.73
  -2   3  -9    0.64    1.15
   2  -3   9    0.62    0.71
  -2   0 -16    6.69    1.95
  -2   0 -16   11.00    1.19
  -2   0 -16   11.39    2.14
   2   0  16    9.83    1.68
   2   0  16   10.05    1.65
  -2  -2  15    5.52    1.39
  -2  -2  15    5.78    0.97
   2  -2 -15    5.82    1.45
   2  -2 -15    5.49    1.00
  -2   2  15    5.94    0.94
  -2   2  15    5.10    1.23
   2   2 -15    5.24    1.39
   2   2 -15    6.04    0.92
  -3  -2  12  595.96    7.92
   3   2 -12  583.43    8.48
   3  -2 -12  602.24    8.52
  -3  -2  12  571.16    6.60
   3   2 -12  609.12    7.51
  -3   2  12  562.59    6.85
   3  -2 -12  605.75    7.69
   3   2 -12  597.34    6.37
  -4   1  -6  511.80    9.32
   4   1   6  546.81    7.15
  -4   1  -6  568.12    6.01
  -4  -1  -6  539.33    9.25
  -4  -1  -6  535.15    7.50
   4   1   6  487.25    9.14
  -4  -1  -6  567.14    4.72
  -1  -4  -2  164.71    4.21
   1   4   2  152.89    2.18
  -1   4  -2  173.31    3.60
  -1   4  -2  153.45    4.63
   1  -4   2  160.34    3.13
   1  -4   2  161.36    4.09
   1   4   2  157.53    4.66
   1   4   2  143.26    2.62
   1   4   2  157.15    4.01
   3  -3  -5   49.05    1.20
   3   3  -5   62.38    2.61
   3   3  -5   58.19    2.86
  -3  -3   5   61.59    2.62
  -3   3   5   55.63    2.86
   3  -3  -5   59.16    2.85
   3  -3  -5   62.06    2.32
   3   3  -5   60.74    2.69
   3  -3  -5   60.75    2.78
  -3  -3   5   63.68    2.78
   3  -3  -5   53.76    3.34
  -3  -3   5   51.08    2.77
  -1  -4   3  315.66    5.93
  -1  -4   3  299.68    5.40
   1   4  -3  324.62    4.17
   1   4  -3  301.20    5.61
   1  -4  -3  306.04    5.64
   1  -4  -3  300.16    4.66
   1   4  -3  284.07    6.02
  -1   4   3  307.14    4.75
   0   3  13   69.15    3.00
   0  -3 -13   69.70    3.07
   0   3 -13   64.52    2.94
   0   3 -13   68.34    2.45
   0   3 -13   66.15    3.45
   0   3  13   69.86    2.50
   0  -3  13   66.65    2.72
   0  -3  13   68.70    2.79
   0  -3 -13   70.61    2.82
   0  -3  13   71.42    2.72
   0  -3 -13   69.43    2.92
   0  -4  -5  219.26    4.67
   0   4   5  216.49    4.49
   0  -4   5  222.17    5.01
   0   4  -5  209.68    3.79
   0   4  -5  214.98    5.31
   0   4  -5  226.24    4.58
   0  -4   5  205.30    3.94
  -1   0 -18   62.97    3.24
   1   0  18   91.35    3.44
   1   0  18   72.89    3.44
  -1   0 -18   78.26    3.95
  -1   0 -18   86.74    2.95
  -3   0 -13   -0.04    0.79
   3   0  13   -0.57    1.45
  -3   0 -13   -0.15    0.71
   3   0  13   -0.81    1.32
  -3   0 -13    0.15    1.74
   1  -3  12   60.20    2.80
  -1  -3 -12   56.05    2.95
  -1   3 -12   57.96    2.34
   1   3  12   60.42    2.74
  -1   3 -12   56.63    2.87
   1   3  12   59.06    2.96
  -1  -3 -12   64.20    2.85
  -1   3 -12   60.95    3.26
  -1  -3 -12   60.35    2.73
  -1   3 -12   58.45    2.08
   1  -3  12   59.59    2.43
   1  -3  12   55.57    2.71
   4   2  -2   87.20    3.89
   4  -2  -2   90.75    2.69
   4  -2  -2   90.71    3.48
   4   2  -2   83.51    3.65
   4  -2  -2   87.72    3.71
  -4  -2   2   90.01    3.26
   4   2  -2   89.87    3.27
  -4  -2   2   92.66    2.57
  -4  -2   1    1.81    0.68
   4   2  -1    1.43    1.27
   4  -2  -1    1.35    1.36
  -4  -2   1    0.91    1.24
  -4  -2   1    1.47    0.94
   4  -2  -1    1.54    1.65
   4   2  -1    0.69    1.62
   4  -2  -1    0.98    0.52
   4   2  -1    1.56    1.02
   4  -2  -1    1.81    1.46
   4  -2  -1    1.55    0.90
   2   3 -11  447.94    7.17
  -2   3  11  452.72    6.93
   2  -3 -11  462.81    6.02
  -2  -3  11  462.36    6.79
   2  -3 -11  455.81    9.16
   2  -3 -11  478.33    6.17
  -2  -3  11  494.12    6.90
   2  -3 -11  482.88    6.99
   2   3 -11  462.70    6.49
   3   3   3 1380.40   14.32
   3  -3   3 1421.74   12.70
   3   3   3 1380.25   13.07
  -3  -3  -3 1406.69   11.54
  -3  -3  -3 1395.14   12.80
   3  -3   3 1388.72    9.60
   4  -2  -3   18.80    1.86
  -4  -2   3   19.49    1.29
   4   2  -3   18.29    1.65
   4  -2  -3   20.81    2.29
   4   2  -3   16.23    1.97
   4   2  -3   20.06    1.41
  -4  -2   3   19.34    1.62
   4   2  -3   16.35    2.20
   4  -2  -3   21.28    1.60
   4  -2  -3   17.77    2.21
  -4  -2   3   15.95    1.84
   1   4   3   18.04    1.64
   1  -4   3   13.83    0.80
  -1  -4  -3   17.16    1.52
  -1   4  -3   14.64    1.02
   1  -4   3   17.71    1.54
   1   4   3   16.68    1.83
   1   4   3   13.68    0.81
   1   4   3   17.53    1.02
  -1   4  -3   20.90    1.44
  -1   4  -3   16.92    1.85
   4   2   0   38.89    2.86
   4  -2   0   44.73    2.82
   4  -2   0   53.05    3.21
  -4  -2   0   37.15    2.64
  -4  -2   0   43.88    1.77
   4   2   0   44.46    2.39
  -4  -2   0   44.52    2.39
   4   2   0   43.64    2.78
   4  -2   0   46.17    1.39
   4  -2   0   41.38    2.87
   0   0 -19    0.70    1.75
   0   0  19   -0.20    1.40
   0   0  19    1.12    1.02
   0   0 -19   -1.21    2.66
   1   4  -4  399.07    6.39
   1  -4  -4  397.05    5.43
   1   4  -4  379.41    6.91
  -1  -4   4  413.12    6.35
   1   4  -4  433.04    5.31
  -1   4   4  410.35    5.66
  -1  -4   4  429.26    7.12
  -1  -3  13  846.26    9.68
   1  -3 -13  816.37    9.01
   1  -3 -13  864.35    9.38
  -1   3  13  872.41    9.55
   1   3 -13  810.98   10.54
  -1  -3  13  802.64    8.57
   1  -3 -13  842.73    9.02
   1   3 -13  793.65    8.85
  -1   3  13  866.15    7.60
  -1  -3  13  871.63    8.96
   1   3 -13  864.04    9.16
   4   0 -11   -0.01    1.12
   4   0 -11    1.32    1.62
  -4   0  11    0.63    1.31
   4   0 -11    0.45    1.10
   4   0 -11    0.85    1.11
  -1   0  19    1.40    0.51
  -1   0  19    0.27    1.47
   1   0 -19    3.57    1.85
   4   2  -4    2.05    1.65
   4  -2  -4    2.07    1.57
   4   2  -4    2.16    0.80
  -4  -2   4    1.99    0.91
  -4  -2   4    2.02    0.71
   4  -2  -4    2.09    1.00
   4  -2  -4    2.06    1.09
   4   2  -4    2.45    1.33
   4  -2  -4    1.12    0.28
  -4  -2   4    2.14    1.26
   4  -2  -4    3.00    1.42
   3  -3  -6  332.10    3.36
  -3  -3   6  339.21    6.46
   3  -3  -6  359.06    6.37
   3   3  -6  366.19    5.89
  -3   3   6  342.79    6.74
  -3  -3   6  358.18    6.03
   3  -3  -6  401.04    6.36
   3   3  -6  344.61    5.91
   3  -3  -6  376.43    5.34
  -3  -3   6  367.83    6.45
   3  -3  -6  297.94    7.05
   3   3  -6  348.60    6.43
  -3   2 -10   36.22    1.50
  -3  -2 -10   34.45    2.61
  -3  -2 -10   43.30    2.83
  -3   2 -10   36.21    1.70
   3  -2  10   36.76    2.90
  -3   2 -10   37.39    2.87
   3   2  10   39.10    2.98
   3  -2  10   38.81    1.60
   2   0 -18    8.99    1.73
   4  -2   1  106.69    4.15
  -4  -2  -1  117.02    2.86
   4  -2   1  117.31    2.07
   4  -2   1  124.37    4.88
  -4  -2  -1  113.07    3.74
   4  -2   1  133.48    3.12
   4   2   1  108.30    3.50
   4   2   1  107.92    4.23
   4   2   1  106.93    4.24
   3   1 -15  778.48    3.95
  -3   1  15  983.18   14.21
  -3   1  15 1167.64   11.04
   3  -1 -15  662.28    5.28
  -3  -1  15 1154.18   12.13
   3  -1 -15 1204.17   11.35
   3   1 -15 1202.91   12.35
  -3  -1  15  382.05    3.33
   3  -1 -15 1139.87   11.42
   3  -1 -15 1076.14    5.79
   3   1 -15 1257.79   10.88
   4  -1 -10  286.17    5.75
   4   1 -10  284.08    5.97
   4  -1 -10  280.40    4.21
   4  -1 -10  270.98    4.52
  -4  -1  10  274.12    5.33
  -4   1  10  294.95    7.14
   4  -1 -10  311.41    5.14
   4   1 -10  311.31    5.28
  -4  -1  10  311.78    5.84
   4  -1 -10  298.65    5.71
   4   1 -10  294.76    4.91
   4   1 -10  293.51    5.37
   0  -4  -6    0.21    0.73
   0   4   6    0.38    0.87
   0  -4   6    0.26    0.80
   0  -4   6    0.14    0.81
   0   4  -6   -0.03    1.11
   0   4  -6    0.08    0.80
   0   4  -6    0.06    1.01
  -1   4  -4   79.58    2.48
  -1   4  -4   71.48    3.28
   1  -4   4   73.00    1.80
   1   4   4   73.57    3.35
   1  -4   4   72.32    2.80
   1   4   4   74.07    2.88
  -1   4  -4   76.41    2.28
  -1  -4  -4   74.18    2.93
   4   0   8    0.78    1.23
  -4   0  -8    0.62    0.82
  -4   0  -8    1.28    1.67
   3   3   4  401.09    7.44
   3  -3   4  397.85    7.05
   3  -3   4  376.81    4.98
  -3  -3  -4  368.05    5.94
  -3   3  -4  422.29    7.46
  -3  -3  -4  389.22    7.05
   3   3   4  365.34    7.48
   4  -2  -5  311.88    5.99
   4  -2  -5  319.25    6.65
  -4  -2   5  286.65    5.94
   4   2  -5  294.49    6.06
   4  -2  -5  330.05    7.13
   4   2  -5  299.77    6.13
  -4  -2   5  315.38    5.93
   4  -2  -5  316.10    5.15
  -4  -2   5  297.66    4.71
   4   2  -5  321.26    5.02
  -1   4   5  121.69    4.25
   1   4  -5  126.93    3.12
   1   4  -5  115.14    3.85
  -1  -4   5  119.00    3.76
   1  -4  -5  124.36    3.21
  -1  -4   5  121.10    3.44
   1   4  -5  121.35    3.67
  -1   4   5  122.98    3.28
  -1   2 -16  148.57    5.22
  -1  -2 -16  170.30    5.14
   1   2  16  151.98    4.61
   1  -2  16  151.17    4.04
  -1  -2 -16  144.01    4.94
   1  -2  16  149.04    4.68
   1  -2  16  162.17    4.00
  -1   2 -16  166.62    3.81
   1   2  16  155.91    4.33
  -1  -2 -16  154.23    4.59
   1  -2  16  123.62    4.88
  -1  -2 -16  167.94    4.63
  -4   1  -7   61.21    2.16
  -4  -1  -7   61.05    1.65
  -4   1  -7   56.26    3.48
   4   1   7   62.23    2.64
  -4  -1  -7   59.92    3.49
   4  -1   7   66.34    3.86
   4   1   7   53.50    3.36
  -4  -1  -7   61.89    2.75
   4   2   2  826.37   11.20
  -4  -2  -2  927.88   11.01
   4  -2   2  870.35   11.54
   4  -2   2  881.73    5.22
  -4  -2  -2  881.66    7.52
   4   2   2  835.75   11.41
   4  -2   2 1004.51   13.35
   4  -2   2  928.49    7.68
  -2  -2 -14   35.77    2.70
   2  -2  14   38.11    2.58
  -2  -2 -14   41.53    2.42
   2   2  14   40.25    2.88
   2  -2  14   37.80    2.94
   2  -2  14   38.86    1.93
  -2  -2 -14   39.04    2.73
   2   2  14   36.84    2.66
  -2   2 -14   41.84    3.18
  -2  -2 -14   42.91    2.92
   2  -2  14   27.42    2.84
  -2   2 -14   38.46    1.78
   0   2  17 2612.06   15.65
   0  -2 -17 2575.20   18.57
   0   2  17 2572.81   16.23
   0  -2  17 2550.84   14.24
   0  -2 -17 2542.73   17.39
  -2   3 -10  392.86    5.45
   2   3  10  409.67    6.97
  -2   3 -10  418.31    7.67
  -2   3 -10  391.70    4.64
  -2  -3 -10  421.81    6.94
  -2  -3 -10  403.56    7.04
   2  -3  10  396.27    5.72
   2  -3  10  421.13    7.25
   3   0 -16    1.57    0.96
   3   0 -16    0.55    1.21
   2  -1  16 1015.54   11.11
   2  -1  16 1147.24   13.75
  -2  -1 -16 1096.49   13.40
  -2  -1 -16 1099.58   13.49
   2  -1  16  970.68   10.59
   2   1  16 1065.27   12.40
  -2  -1 -16 1066.68   11.71
  -2   1 -16  997.79    8.36
  -2  -1 -16  958.39   10.78
   3  -3  -7   65.51    1.72
   3   3  -7   62.67    2.85
  -3  -3   7   64.57    2.68
  -3  -3   7   64.95    2.77
   3   3  -7   62.22    2.76
   3  -3  -7   68.19    2.81
   3  -3  -7   63.69    2.83
   3  -3  -7   66.06    2.35
   3  -3  -7   57.51    3.39
  -3  -3   7   60.32    2.93
   3   3  -7   64.59    2.64
  -3   3   7   64.14    3.07
  -1  -2  17  266.03    4.23
  -1   2  17  284.53    4.71
   1   2 -17  255.94    6.67
   1  -2 -17  268.09    4.87
  -1  -2  17  265.10    5.54
   1  -2 -17  277.40    6.30
  -1   2  17  253.37    4.88
   3  -2 -13   56.23    2.62
   3   2 -13   54.53    2.85
  -3   2  13   54.55    2.23
  -3  -2  13   56.62    2.24
   3  -2 -13   51.72    2.84
   3   2 -13   61.99    2.16
  -3  -2  13   64.56    2.96
   3  -2 -13   62.23    2.30
   4  -2  -6   32.62    2.48
   4   2  -6   31.82    1.78
   4  -2  -6   32.24    2.56
  -4  -2   6   32.61    1.70
  -4  -2   6   32.59    2.02
   4   2  -6   29.85    2.13
   4   2  -6   30.89    2.22
  -4  -2   6   28.29    2.13
   4  -2  -6   30.93    1.85
   4  -2  -6   32.02    2.13
  -1   1 -18  176.04    3.89
   1  -1  18  191.43    4.53
  -1  -1 -18  152.44    4.82
   1  -1  18  159.85    4.77
   1  -1  18  164.73    4.96
   1   1  18  195.73    5.00
  -1  -1 -18  159.09    5.27
   1   1  18  147.29    5.64
  -1  -1 -18  181.74    5.24
  -1   4  -5   53.39    2.27
   1  -4   5   47.70    1.74
   1  -4   5   48.91    2.40
  -1   4  -5   51.12    2.10
  -1  -4  -5   45.84    2.37
   1   4   5   47.52    2.39
   1   4   5   45.69    2.83
  -1   4  -5   44.27    2.70
  -3   1 -13   82.30    2.12
  -3  -1 -13   83.43    2.98
  -3   1 -13   84.25    2.89
   3   1  13   84.04    4.08
  -3  -1 -13   85.08    3.26
  -3  -1 -13   89.38    4.08
   3  -1  13   78.48    2.69
   4  -2   3  607.88    4.22
  -4  -2  -3  573.07    8.27
   4   2   3  546.61    9.40
   4  -2   3  669.96   11.08
   4  -2   3  580.97    9.36
  -4  -2  -3  632.22    6.65
  -1  -4   6  265.66    5.63
  -1   4   6  260.89    6.08
   1   4  -6  256.82    5.64
   1   4  -6  267.70    4.62
   1   4  -6  263.70    5.34
   1  -4  -6  260.24    4.59
  -1   4   6  258.80    4.90
  -1  -4   6  247.36    4.84
   3  -3   5   35.55    4.43
  -3  -3  -5   40.94    2.14
   3   3   5   39.67    2.78
   3   3   5   42.02    2.80
   3  -3   5   43.31    1.82
  -3  -3  -5   44.61    2.53
  -3   3  -5   44.34    2.79
   3  -3   5   43.92    2.83
  -2  -3  12  468.95    6.79
  -2   3  12  438.81    6.86
   2  -3 -12  476.76    6.67
   2   3 -12  434.06    7.21
   2  -3 -12  490.03    7.14
   2   3 -12  467.33    6.61
  -2  -3  12  445.34    6.58
   2  -3 -12  466.12    6.41
   0   4  -7   14.23    1.66
   0  -4   7   16.41    1.60
   0   4  -7   15.26    1.69
   0   4  -7   16.45    1.45
   0  -4  -7   17.06    1.54
   0   4   7   15.86    1.77
   0  -4   7   15.96    1.28
   0   4   7   16.49    1.54
  -2   2  16   90.47    2.53
  -2   2  16   82.81    2.90
   2  -2 -16   86.00    3.45
  -2  -2  16   86.83    2.41
   2   2 -16   88.08    2.45
   2   2 -16   83.64    3.68
   2  -2 -16   93.67    2.69
   4   0 -12 2154.82   11.45
   4   0 -12 1762.89   14.75
   4   0 -12 2075.26   12.01
   4   0 -12 1804.96   12.08
  -4   0  12 1755.92   15.27
   4   0 -12 1930.55   12.22
   0  -1 -19  101.41    3.54
   0   1  19  134.14    3.45
   0  -1  19  128.19    3.20
   0  -1  19  112.28    3.54
   0  -1 -19  125.29    4.64
   0   1  19  104.12    5.02
   0  -1  19  114.64    4.37
   0   3  14  138.84    3.53
   0  -3 -14  142.22    4.03
   0  -3  14  127.50    3.73
   0  -3 -14  141.18    4.24
   0  -3 -14  139.76    4.09
   0  -3  14  130.66    3.69
   0   3 -14  132.53    4.76
   0  -3  14  135.41    3.72
   0   3 -14  134.35    3.41
   0   3 -14  130.26    4.02
   0   3  14  147.83    4.27
   4  -1 -11   96.04    2.55
   4  -1 -11  111.51    3.04
  -4  -1  11   92.74    3.25
  -4   1  11  107.98    4.61
   4  -1 -11   99.66    3.26
   4   1 -11   99.17    3.72
   4  -1 -11   97.87    3.50
   4   1 -11  102.60    2.96
   4  -1 -11   94.85    2.86
   4   1 -11   94.06    3.19
   4   1 -11  101.48    2.99
  -4  -1  11  104.91    3.39
   1  -3  13    7.76    1.43
  -1  -3 -13   11.18    1.69
   1   3  13    8.69    1.56
  -1  -3 -13    7.40    1.67
   1  -3  13   10.10    1.22
  -1   3 -13    9.32    1.95
   1   3  13    7.64    1.55
  -1   3 -13   10.38    1.59
   1  -3  13    9.10    1.68
  -1  -3 -13   10.54    1.38
  -1   3 -13    9.89    1.19
  -1   1  19   16.95    2.58
  -1   1  19   20.76    1.25
   1   1 -19   18.19    2.35
  -1  -1  19   13.78    1.12
   1  -1 -19   20.01    2.35
  -1  -1  19   18.54    2.19
   2  -1 -18  224.29    5.72
   2   1 -18  232.06    6.12
   4   2  -7    3.02    1.29
   4   2  -7    2.67    1.19
   4  -2  -7    2.81    1.34
  -4  -2   7    2.12    1.19
  -4  -2   7    2.86    0.82
   4  -2  -7    2.97    1.58
   4  -2  -7    3.40    1.11
  -4  -2   7    3.10    0.92
   4  -2  -7    2.37    1.20
   4   2  -7    3.31    0.96
   4  -2  -7    3.43    1.22
   3  -3  -8  111.83    3.59
  -3   3   8  103.84    3.72
   3   3  -8  101.63    3.42
  -3  -3   8  107.24    3.46
   3  -3  -8  110.26    2.96
  -3  -3   8   99.00    3.55
   3  -3  -8  108.87    2.37
   3   3  -8  108.48    3.59
  -3  -3   8  104.49    3.44
   3  -3  -8  106.05    4.41
   2   0  17    0.46    1.23
  -2   0 -17    0.47    1.67
  -2   0 -17    0.24    0.80
  -2   0 -17   -0.74    2.03
   2   0  17   -0.16    1.28
   3   0  14   14.17    1.67
   3   0  14   16.05    2.15
  -3   0 -14   13.73    1.44
  -3   0 -14   16.19    1.19
  -3   0 -14   14.55    2.34
   3   2  11   55.89    3.39
  -3   2 -11   58.77    1.93
   3  -2  11   55.53    1.91
  -3  -2 -11   61.89    3.28
   3  -2  11   55.02    3.39
  -3   2 -11   56.68    3.41
  -3  -2 -11   57.27    3.26
  -1  -3  14 1902.56   14.26
   1  -3 -14 2014.01   14.67
  -1  -3  14 1891.28   13.09
  -1  -3  14 2096.18   14.43
   1   3 -14 2038.38   14.20
   1  -3 -14 1987.87   14.51
  -1   3  14 2059.69   14.75
  -1   3  14 2058.82   12.27
   1   3 -14 1933.13   16.81
   1  -3 -14 1985.42   14.48
  -4   0  -9    0.26    0.77
  -4   0  -9    0.00    0.20
   4   0   9    0.05    1.27
  -4   0  -9    0.22    1.65
   4  -1   8   81.48    4.25
  -4  -1  -8   72.84    3.77
  -4   1  -8   72.24    2.39
   4   1   8   65.11    3.68
  -4  -1  -8   74.96    3.06
  -4  -1  -8   74.79    1.94
  -4   1  -8   65.06    3.74
   4   1   8   75.37    2.94
  -4   2  -4  278.41    6.76
   4  -2   4  285.67    2.82
  -4  -2  -4  294.01    4.51
   4  -2   4  315.57    7.75
  -4  -2  -4  273.09    5.83
   4  -2   4  265.48    6.54
   4   2   4  254.73    6.55
  -1   4  -6   44.81    2.19
   1  -4   6   41.37    2.17
  -1  -4  -6   40.04    2.24
  -1   4  -6   45.02    1.98
  -1  -4   7   68.59    2.96
   1  -4  -7   73.66    2.67
  -1   4   7   72.70    3.31
   1   4  -7   68.43    3.08
   1   4  -7   73.77    2.75
   1   4  -7   69.25    2.80
   3  -1 -16  847.65   10.17
  -3  -1  16  867.17   11.47
   3   1 -16  866.03   10.68
  -3  -3  -6   69.89    2.76
  -3  -3  -6   75.33    3.24
   3   3   6   66.54    3.47
  -3   3  -6   49.77    1.12
  -3   3  -6   73.41    3.49
   3  -3   6   70.60    2.26
   3   3   6   70.91    3.44
   3  -3   6   72.12    3.47
   3  -3   6   70.97    6.50
  -3   3  -6   44.54    1.15
  -1   0 -19   -0.98    1.77
  -1   0 -19   -0.08    0.89
   1   0  19   -0.42    1.11
  -1   0 -19   -0.54    1.51
   1   0  19   -0.12    1.23
  -2   3 -11    0.30    0.72
  -2  -3 -11    0.40    0.92
   2  -3  11    0.39    2.57
  -2  -3 -11   -0.14    1.40
   2  -3  11   -0.07    0.70
   2   3  11    0.08    1.30
   2  -3  11   -0.05    1.80
   2   3  11    0.19    1.60
  -2   3 -11   -0.47    1.68
   0   4  -8   36.84    2.28
   0   4   8   36.84    2.19
   0  -4   8   37.71    2.19
   0   4  -8   42.07    2.14
   0  -4   8   43.85    1.88
   0   4  -8   37.39    2.42
   0   4   8   42.82    2.67
   0  -4  -8   40.88    2.24
   4  -2  -8  129.12    3.77
   4   2  -8  122.81    3.85
   4   2  -8  119.48    4.11
   4  -2  -8  101.86    3.95
  -4  -2   8  123.03    3.41
  -4  -2   8  110.24    3.63
   4   2  -8  125.31    3.37
   4  -2  -8  127.97    3.73
   4  -2  -8  120.80    3.77
   2   0 -19    0.34    1.36
   2   4  -1  620.86    7.60
  -2  -4   1  587.51    8.40
   2   4  -1  634.05    6.54
  -2   4   1  635.95    5.68
   2   4  -1  572.52    9.04
   2  -4  -1  628.50    5.21
   2  -4  -1  601.87    7.84
  -2  -4   1  595.14    8.36
   0   0 -20   -0.51    2.01
   0   0  20    0.88    0.97
   0   0 -20   -0.24    1.65
   0   0  20    0.21    1.37
  -3   2  14  759.33    7.62
   3  -2 -14  762.93   10.14
   3  -2 -14  761.40    9.14
   3   2 -14  832.39    7.02
  -3  -2  14  791.22    9.46
   3   2 -14  752.16    9.99
  -3  -2  14  782.54    7.46
   3  -2 -14  853.46    7.71
   2  -4   0  140.43    3.79
   2   4   0  139.69    4.56
   2   4   0  158.18    3.40
  -2  -4   0  139.84    4.10
  -2  -4   0  154.62    4.40
   2   4   0  153.77    3.95
  -2   4   0  158.41    2.84
   2  -4   0  140.13    2.41
  -1   0  20  166.04    2.39
  -1   0  20  160.27    2.30
   1   0 -20  190.50    5.91
  -1   0  20  182.52    6.12
   3  -3  -9    0.30    1.60
  -3   3   9    0.13    1.09
   3  -3  -9    0.32    1.01
  -3  -3   9   -0.26    1.22
   3   3  -9    0.53    1.00
   3   3  -9   -0.10    1.15
  -3  -3   9   -0.01    0.80
   3  -3  -9    0.49    0.62
   3  -3  -9    0.59    0.87
   2   4  -2 2271.42   17.66
  -2  -4   2 2288.23   16.26
   2  -4  -2 2382.36   15.41
  -2  -4   2 2289.55   15.98
  -2   4   2 2133.42   17.75
   2  -4  -2 2437.50   10.47
   2   4  -2 2453.70   12.70
   2   4  -2 2516.85   15.17
   4  -2   5 1066.63   12.81
  -4  -2  -5 1137.44   11.86
   4  -2   5 1296.27   16.01
  -4  -2  -5 1241.52    9.34
   4   2   5 1056.21   13.24
  -4   2  -5  916.50    4.91
  -4   2  -5 1178.07   14.04
   2   2  15   95.63    3.96
  -2  -2 -15  102.82    3.67
  -2   2 -15   98.65    2.78
   2   2  15   99.15    4.16
  -2   2 -15  101.05    4.60
   2  -2  15   95.22    3.79
   2  -2  15   99.13    3.17
  -2  -2 -15  101.72    4.13
  -2  -2 -15   88.01    3.74
   4   1 -12  112.27    3.93
   4   1 -12  124.70    3.06
   4  -1 -12  118.30    3.92
   4   1 -12  120.54    3.34
   4  -1 -12  114.39    3.21
  -4  -1  12  128.04    3.45
   4  -1 -12  114.09    2.84
  -4  -1  12  114.49    3.73
   4  -1 -12  116.59    3.34
  -4   1  12  119.15    4.99
   3   0 -17    0.55    1.19
  -3   0  17   -0.40    1.16
   2   4   1  146.74    3.85
  -2  -4  -1  132.79    4.01
   2  -4   1  136.41    3.72
  -2  -4  -1  133.68    4.04
   2   4   1  132.39    4.46
   2   4   1  148.80    3.25
   2  -3 -13   20.05    1.77
  -2  -3  13   20.23    1.77
  -2  -3  13   21.82    1.94
   2   3 -13   18.76    1.99
  -2   3  13   20.88    1.65
   2  -3 -13   20.51    1.78
  -2   3  13   19.13    1.73
   2   3 -13   20.03    1.65
   2  -3 -13   20.20    1.61
   1   2  17   37.94    2.72
   1  -2  17   31.45    2.69
   1   2  17   36.81    2.34
  -1   2 -17   37.43    3.12
   1  -2  17   37.98    2.26
  -1   2 -17   40.00    2.00
  -1  -2 -17   42.48    3.00
   1  -2  17   38.64    2.23
  -1  -2 -17   38.79    2.62
  -1  -2 -17   41.75    2.46
  -1   4  -7   81.06    2.99
  -1   4  -7   75.92    3.54
  -1  -4  -7   74.15    2.99
   1  -4   7   78.04    2.96
  -1   4  -7   81.41    2.60
  -4   0  13   -0.55    1.29
   4   0 -13   -0.13    0.97
   4   0 -13    0.54    1.38
   4   0 -13    0.03    0.98
   4   0 -13    0.31    0.87
   2  -4  -3  359.00    4.28
   2   4  -3  371.14    5.93
  -2  -4   3  352.69    6.58
  -2   4   3  340.51    7.04
   2  -4  -3  330.77    5.69
  -2  -4   3  346.67    6.37
   2   4  -3  391.20    5.40
   2   4  -3  342.30    6.77
   1   4  -8   65.69    3.04
  -1   4   8   71.53    3.27
   1   4  -8   67.42    2.84
  -1  -4   8   67.17    2.94
  -1  -4   8   76.44    2.54
   1  -4  -8   67.32    2.56
   0  -2  18  869.91    9.89
   0   2 -18  959.84   13.02
   0  -2 -18  942.31   11.71
   0   2  18  922.41   10.00
   0  -2 -18  894.25   10.66
   0   2  18  930.65    9.54
   0  -2 -18  918.04   10.15
   0  -2  18  921.78    8.73
  -2  -1 -17  264.50    6.80
   2  -1  17  230.97    5.44
   2   1  17  246.40    6.22
  -2  -1 -17  251.33    5.93
  -2  -1 -17  234.09    5.55
  -2  -1 -17  259.52    6.78
   2  -1  17  266.14    6.79
  -2   1 -17  246.99    4.32
   2  -1  17  270.28    5.97
  -3   1 -14  491.67    5.26
   3  -1  14  529.86    7.33
   3  -1  14  545.41   10.25
  -3  -1 -14  499.41    7.74
  -3  -1 -14  524.14    9.53
   3   1  14  528.70    9.60
  -3  -1 -14  541.08    7.58
  -2  -4  -2   49.99    2.53
  -2  -4  -2   56.51    2.89
  -2   4  -2   52.16    3.10
   2   4   2   55.65    2.62
  -2   4  -2   56.83    1.80
   2   4   2   54.27    3.18
   2  -4   2   58.23    2.58
  -3  -3  -7  258.87    5.79
  -3  -3  -7  268.16    5.91
   3   3   7  274.85    6.38
   3  -3   7  269.86    4.34
   3   3   7  255.18    6.47
   3  -3   7  262.65    6.04
   3  -3   7  236.04   10.55
  -3   3  -7  282.41    6.45
  -3  -3  -7  259.07    5.14
  -4   1  -9   44.48    3.34
  -4  -1  -9   47.75    3.26
   4   1   9   43.18    3.20
   4   1   9   48.36    2.51
  -4  -1  -9   48.02    1.92
  -4   1  -9   48.78    2.06
   4  -1   9   49.85    3.51
  -4  -1  -9   50.16    2.57
  -1   2  18  771.92    7.72
   1  -2 -18  726.20    8.09
  -1   2  18  698.17    8.20
  -1  -2  18  669.54    8.86
   1   2 -18  701.56   10.99
  -1  -2  18  728.51    6.93
   1  -2 -18  792.28   10.70
  -2   4   4  415.74    7.71
   2   4  -4  470.35    6.01
   2   4  -4  396.96    7.22
  -2  -4   4  421.90    6.92
   2  -4  -4  452.32    5.05
  -4   0 -10    6.29    1.94
  -4   0 -10    5.38    0.43
  -4   0 -10    5.90    1.10
   4   0  10    4.96    1.76
  -1  -3 -14   76.22    3.53
   1   3  14   76.73    3.40
   1   3  14   79.25    3.25
   1  -3  14   83.87    3.51
  -1   3 -14   80.23    3.90
   1  -3  14   81.81    2.94
   1  -3  14   71.47    3.08
  -1  -3 -14   84.88    3.42
  -1  -3 -14   81.44    3.26
  -1   3 -14   75.03    2.77
   0   3  15   63.60    2.62
   0   3 -15   58.25    2.39
   0  -3 -15   61.20    3.07
   0  -3  15   61.41    2.67
   0  -3  15   57.96    2.77
   0   3 -15   60.70    3.52
   0  -3 -15   63.64    3.05
   0   3 -15   59.09    2.85
   0   3  15   66.20    2.99
   0  -3 -15   65.94    2.85
   0  -3  15   69.20    2.85
  -4  -2   9  318.85    5.56
  -4  -2   9  295.97    5.70
   4  -2  -9  317.07    5.80
   4   2  -9  337.56    5.62
   4   2  -9  308.43    6.31
   4  -2  -9  324.07    6.00
   4  -2  -9  335.58    5.92
   4   2  -9  319.58    5.95
   0  -4   9   19.10    1.71
   0   4   9   17.58    1.73
   0   4  -9   18.61    1.55
   0  -4  -9   20.30    1.72
   0   4  -9   17.52    1.82
   0   4   9   21.40    2.06
   0   4  -9   16.15    1.90
   0  -4   9   20.03    1.60
   0   4   9   16.48    0.82
  -3  -2 -12  139.41    4.85
  -3  -2 -12  125.13    4.03
  -3  -2 -12  135.42    4.61
  -3   2 -12  140.30    2.94
  -3   2 -12  146.37    5.42
   3  -2  12  134.78    5.27
   3  -2  12  140.44    3.19
   2  -2 -17  539.72    8.36
  -2  -2  17  534.18    5.59
  -2   2  17  531.00    7.16
   2   2 -17  540.86    9.19
   2   4   3  317.69    7.00
   2  -4   3  321.86    5.68
   2   4   3  320.74    5.50
  -2   4  -3  322.56    7.42
  -2  -4  -3  305.51    6.09
  -2  -4  -3  307.11    6.04
  -2   4  -3  334.44    4.15
   1  -1  19  169.70    4.44
  -1  -1 -19  146.50    4.85
  -1  -1 -19  157.76    5.47
   1   1  19  193.83    5.01
  -1   1 -19  180.41    4.04
   1   1  19  149.19    5.91
   1  -1  19  163.73    5.10
   1  -1  19  179.51    5.17
  -4   2  -6  799.97    5.29
  -4  -2  -6  893.74   10.75
   4   2   6  841.02   12.26
   4  -2   6  925.96   13.15
  -4   2  -6  893.62   12.39
  -4  -2  -6  922.65    7.98
  -1   3  15   14.64    1.68
   1  -3 -15   15.27    2.16
  -1  -3  15   12.54    1.55
   1   3 -15   10.27    2.23
   1  -3 -15   14.44    1.63
  -1  -3  15   14.79    1.62
   1  -3 -15   15.23    1.89
  -1  -3  15   14.04    1.91
  -1   3  15   13.61    1.54
   1   3 -15   13.08    1.59
   2   4  -5   76.13    2.62
   2  -4  -5   78.29    2.26
  -2  -4   5   76.83    3.06
   2   4  -5   70.90    3.21
  -2   4   5   69.51    3.32
   3  -3 -10   62.23    3.48
   3  -3 -10   83.00    2.78
   3   3 -10   75.19    3.20
  -3   3  10   79.80    3.27
   3  -3 -10   81.06    3.11
   3   3 -10   73.83    2.91
   3  -3 -10   83.63    2.43
  -3  -3  10   73.72    2.97
  -3  -3  10   71.47    3.01
   3   0  15   -0.68    1.33
  -3   0 -15   -0.09    0.78
   3   0  15   -0.14    1.48
  -3   0 -15    0.18    1.89
  -3   0 -15   -0.05    0.94
  -1   4  -8  372.31    5.53
  -1  -4  -8  366.78    6.64
  -1   4  -8  384.04    6.42
  -1   4  -8  346.80    7.16
   1  -4   8  342.44    5.99
  -2  -3 -12  222.97    5.49
  -2   3 -12  211.48    5.92
   2  -3  12  210.58    4.27
   2  -3  12  208.58    5.57
   2   3  12  201.52    5.19
  -2   3 -12  196.96    3.97
  -2  -3 -12  206.51    5.14
   2   3  12  197.71    5.69
   2   1 -19   20.08    2.36
   2  -1 -19   18.88    2.20
  -2  -1  19   15.17    2.08
   0  -1  20   10.81    1.87
   0   1  20   10.99    2.34
   0  -1  20   12.17    1.35
   0   1  20   18.71    1.66
   0  -1  20   10.73    1.54
   0  -1 -20   13.08    2.24
   0   1 -20   10.93    2.36
  -1   1  20  283.49    4.00
  -1  -1  20  203.58    3.36
   1  -1 -20  277.43    6.95
   1   1 -20  258.55    6.98
  -1   1  20  211.78    7.41
  -1  -1  20  283.79    7.30
  -1   4   9    3.39    1.29
   1   4  -9    5.02    1.29
  -1  -4   9    3.83    1.20
  -1  -4   9    4.12    1.11
   1  -4  -9    4.29    1.04
   1   4  -9    3.73    1.42
   2   4   4  136.71    3.75
  -2   4  -4  129.29    4.72
  -2  -4  -4  124.45    3.94
  -2   4  -4  151.37    3.73
  -2   4  -4  151.87    3.03
  -2  -4  -4  129.25    4.04
   2   4   4  130.73    4.62
   2  -4   4  126.17    3.61
  -2   0 -18   40.69    3.25
   2   0  18   37.31    2.79
  -2   0 -18   45.54    2.16
  -2   0 -18   44.39    3.36
  -3  -1  17  203.40    5.88
   3  -1 -17  218.27    5.51
   3   1 -17  219.21    5.78
   4   1 -13   30.97    1.95
   4   1 -13   31.70    1.70
  -4   1  13   29.47    2.95
  -4  -1  13   29.01    1.77
   4  -1 -13   25.75    1.73
   4  -1 -13   31.00    2.31
   4   1 -13   29.83    2.42
   4  -1 -13   27.09    1.79
  -4  -1  13   29.01    2.23
  -3  -3  -8  192.13    5.12
   3   3   8  180.38    5.57
   3  -3   8  200.98    3.82
  -3  -3  -8  200.35    5.33
  -3   3  -8  204.06    5.73
   3   3   8  194.16    5.50
   3  -3   8  201.61    5.47
   2   4  -6    2.63    1.18
  -2  -4   6    3.17    1.02
  -2   4   6    3.22    1.38
   2   4  -6    2.25    1.24
   2  -4  -6    3.54    0.85
   3  -2 -15  154.15    4.41
  -3   2  15  155.02    3.49
   3   2 -15  147.80    4.63
  -3  -2  15  154.89    4.37
   3   2 -15  166.68    3.19
  -3  -2  15  157.50    3.33
   4   2 -10  576.52    7.34
   4  -2 -10  592.11    8.36
  -4  -2  10  544.60    7.44
  -4  -2  10  520.81    7.39
   4  -2 -10  597.07    7.64
   4   2 -10  551.35    7.42
   4  -2 -10  563.71    7.91
   4   2 -10  527.27    8.31
   4   0 -14  568.12    8.81
  -4   0  14  525.60    8.84
   4   0 -14  532.96    6.73
   4   0 -14  592.26    7.24
   2  -3 -14   17.42    1.76
   2   3 -14   16.58    1.55
   2   3 -14   14.71    1.95
  -2   3  14   15.39    1.63
   2  -3 -14   15.74    1.53
  -2  -3  14   16.99    1.67
   2  -3 -14   15.06    1.70
  -2  -3  14   15.83    1.84
  -2   3  14   16.08    1.53
  -5   0   2 1052.17    9.05
  -5   0   2 1070.56    6.71
   5   0  -2 1064.37    9.60
   5   0  -2 1060.73   12.99
  -5   0   3   -0.01    1.40
  -5   0   3    0.08    0.83
  -5   0   3    0.40    0.72
   5   0  -3    0.23    1.38
   5   0  -3    0.33    0.96
   5   0  -1   -0.33    1.49
   5   0  -1    0.70    0.99
  -5   0   1    0.34    0.85
   0   4 -10   66.26    3.20
   0   4  10   72.90    3.36
   0  -4 -10   72.07    2.94
   0  -4  10   77.79    2.67
   0   4 -10   65.00    3.03
   0   4 -10   70.45    2.71
   0  -4  10   68.55    2.98
  -4  -1 -10  178.09    5.79
  -4  -1 -10  184.20    3.72
  -4   1 -10  171.79    3.74
  -4  -1 -10  197.08    5.12
   4  -1  10  196.74    6.40
   4   1  10  174.08    5.82
  -4   2  -7 2190.28   19.52
   4   2   7 2167.74   19.85
  -4  -2  -7 2217.98   16.69
  -4  -2  -7 2132.09   18.00
  -4   2  -7 2148.69    9.64
   5   0  -4    1.34    1.36
  -5   0   4    2.15    0.99
  -5   0   4    2.31    1.27
   5   0  -4    2.09    0.96
  -5   0   0  899.24    8.62
   5   0   0  871.17    8.46
   2  -4   5   33.59    1.98
  -2   4  -5   38.85    2.30
  -2  -4  -5   33.38    2.21
   2   4   5   33.52    2.66
  -2   4  -5   37.37    1.58
  -2  -4  -5   34.49    2.28
  -2   4  -5   32.43    2.64
   2   4   5   36.96    2.33
   1   0  20   41.47    3.06
  -1   0 -20   44.09    3.39
   1   0  20   48.03    2.60
   2  -2  16    0.38    0.86
  -2  -2 -16    0.23    0.93
   2   2  16    0.02    1.31
  -2  -2 -16    1.35    1.65
  -2   2 -16    0.34    0.72
   2  -2  16    0.61    1.50
  -2   2 -16    0.71    1.94
  -2  -2 -16    0.66    1.42
  -4   0 -11    0.01    0.84
  -4   0 -11    0.09    1.69
  -3   0  18   80.79    3.91
   3   0 -18   91.83    3.85
  -3  -3  11   64.44    2.89
   3  -3 -11   74.08    2.69
   3  -3 -11   77.52    2.49
   3  -3 -11   77.14    3.03
  -3   3  11   74.05    3.16
   3   3 -11   70.55    3.18
   3   3 -11   70.49    2.77
  -3  -3  11   70.60    2.93
   2   0 -20   71.69    3.73
  -1   4  -9  120.18    3.18
  -1  -4  -9  121.40    3.98
  -1   4  -9  118.25    4.51
   1   4   9  114.60    2.98
   1   4   9  106.31    4.15
   1  -4   9  108.58    3.64
  -1  -4  -9  129.42    3.31
  -1   4  -9  128.25    4.11
  -5   0   5   -0.01    0.98
   5   0  -5    0.01    0.87
  -5   0   5    0.41    1.47
   5   0  -5    0.13    1.19
   2  -4  -7  534.89    6.23
  -2   4   7  504.20    8.52
   2   4  -7  521.56    6.99
  -2  -4   7  486.69    7.23
   2   4  -7  486.44    7.82
   5   0   1    0.35    0.99
   5   0   1    0.24    1.56
  -5   0  -1    0.45    0.92
   3  -1  15   13.83    1.73
  -3  -1 -15   12.83    1.61
  -3  -1 -15   14.08    2.45
  -3   1 -15   12.13    1.47
  -3   1 -15   12.69    1.10
   3   1  15   12.97    2.26
  -3  -1 -15   12.81    1.74
   3  -1  15    9.60    2.17
   1   2  18    3.65    1.28
  -1   2 -18    4.78    2.00
   1  -2  18    3.21    1.62
  -1  -2 -18    4.11    1.85
  -1  -2 -18    4.43    1.20
   1  -2  18    3.74    1.09
  -1  -2 -18    2.75    1.56
   1  -2  18    4.62    1.27
   3   2  13    9.89    1.89
   3  -2  13   11.01    1.17
  -3   2 -13   11.66    1.05
   3  -2  13    7.27    2.06
  -3  -2 -13   10.65    1.79
  -3   2 -13   12.87    2.44
  -3  -2 -13   13.77    2.26
  -3  -2 -13   11.14    1.49
   1   4 -10    2.73    1.47
   1  -4 -10    3.75    1.00
  -1  -4  10    2.78    1.06
   1   4 -10    2.63    1.23
  -1   4  10    2.85    1.25
  -1  -4  10    2.37    1.25
   1   3  15   61.52    3.10
   1  -3  15   68.24    2.87
  -1   3 -15   58.74    3.62
  -1  -3 -15   60.82    2.86
   1  -3  15   68.04    3.36
   1   3  15   62.72    3.03
  -1  -3 -15   64.02    3.17
  -1   0  21    0.00    0.52
  -1   0  21   -0.05    1.56
   1   0 -21   -0.73    1.80
  -1   0  21    0.73    0.47
   0   0  21   -0.46    1.02
   0   0  21    0.07    1.40
   0   0 -21   -0.41    1.79
   0  -3 -16   40.38    2.71
   0   3  16   48.09    2.75
   0  -3  16   45.72    2.50
   0  -3 -16   39.29    2.29
   0  -3 -16   41.60    2.63
   0   3  16   40.95    2.23
   0  -3  16   39.04    2.27
   0   3 -16   40.95    3.11
   0   3 -16   34.40    2.30
   0  -3  16   38.05    2.45
   0   2 -19   40.34    3.29
   0  -2 -19   35.23    2.48
   0   2  19   38.90    2.26
   0  -2  19   38.81    2.07
   0  -2 -19   37.93    3.00
   0  -2  19   35.24    2.35
   0  -2 -19   37.23    2.48
  -2  -1 -18  298.24    6.44
   2  -1  18  266.56    6.94
   2  -1  18  343.66    6.77
  -2  -1 -18  302.01    6.42
  -2   1 -18  304.12    4.83
  -2  -1 -18  317.71    7.62
   2  -1  18  307.14    6.50
  -2  -1 -18  315.33    7.64
   2   1  18  343.19    7.30
  -5   0   6   24.42    1.85
   5   0  -6   21.18    2.08
   5   0  -6   20.63    1.62
   4   2 -11  102.62    3.91
   4  -2 -11  118.49    3.56
   4   2 -11  104.93    3.27
   4  -2 -11  119.65    4.12
   4   2 -11  105.70    3.26
  -4  -2  11   98.30    3.26
  -4  -2  11  107.18    3.54
   4  -2 -11  108.28    3.70
  -1  -2  19  308.82    4.56
  -1   2  19  299.45    5.60
   1  -2 -19  348.69    7.42
  -1   2  19  335.39    5.18
  -1  -2  19  327.66    6.71
   1   2 -19  329.08    7.77
  -3   3  -9  141.47    5.06
  -3  -3  -9  136.59    4.57
   3   3   9  133.97    4.78
   3  -3   9  134.90    3.25
   3  -3   9  133.20    4.69
  -3  -3  -9  128.60    4.33
  -5   0  -2  979.96    9.37
   5   0   2  950.88    8.82
  -2  -3 -13   40.59    2.44
   2  -3  13   41.83    2.07
   2  -3  13   42.13    2.98
  -2   3 -13   43.80    2.07
   2   3  13   41.84    2.83
  -2  -3 -13   46.27    2.89
  -2   3 -13   45.68    3.31
   2  -3  13   37.45    4.72
   2   3  13   41.39    2.93
   2   4   6  195.43    5.81
  -2  -4  -6  191.29    5.02
  -2   4  -6  189.38    5.65
  -2   4  -6  200.50    3.52
   2  -4   6  192.62    4.40
  -2  -4  -6  180.53    4.82
   2   4   6  205.70    4.57
  -2   4  -6  217.44    4.91
   1  -3 -16  129.72    4.27
   1  -3 -16  128.18    4.00
   1   3 -16  118.69    4.64
   1  -3 -16  124.42    3.95
   1   3 -16  117.78    3.70
  -1  -3  16  116.80    3.42
  -1  -3  16  137.34    4.27
  -1   3  16  130.83    3.42
  -1   3  16  130.50    3.89
  -2   2  18  133.67    3.90
   2  -2 -18  135.72    4.60
  -2   2  18  141.20    3.12
   2   2 -18  139.57    5.16
   4  -1 -14  511.94    8.13
  -4   1  14  520.68   10.71
   4  -1 -14  491.09    6.75
  -4  -1  14  515.49    8.71
   4   1 -14  521.35    8.62
  -5  -1   2  308.76    3.87
   5   1  -2  314.13    7.23
  -5  -1   2  324.12    5.91
  -4   2  -8   93.88    2.30
  -4  -2  -8   90.05    3.57
  -4  -2  -8   99.07    2.86
  -4  -2  -8   93.99    4.30
  -4   2  -8   93.31    4.55
   4   2   8   88.46    4.42
  -5  -1   3   31.45    2.02
  -5  -1   3   30.52    1.46
   5   1  -3   33.71    2.16
   5   1  -3   28.15    2.62
   5  -1  -3   26.20    2.44
   5   1  -1  136.82    4.96
  -5  -1   1  145.56    4.14
   5   1  -1  142.08    3.92
  -5  -1   1  136.94    2.46
   2   4  -8  948.16   10.72
   2  -4  -8 1036.82    8.86
   2   4  -8 1010.26   10.11
  -2   4   8  974.19   11.64
  -3   0 -16 1041.73    8.72
  -3   0 -16 1044.91   14.17
   3   0  16  929.49   11.57
  -3   0 -16  964.44   10.76
   3   0  16 1001.29   13.67
   0   4 -11   75.25    3.34
   0  -4 -11   83.13    3.22
   0   4 -11   71.25    3.35
   0   4  11   78.28    3.50
   0  -4  11   77.12    3.17
   0   4 -11   78.90    3.00
  -4   0  15    0.12    1.42
   4   0 -15    0.46    1.54
   5   0  -7   -0.15    1.16
   5   0  -7   -0.26    1.34
  -5   0   7    0.42    1.04
  -5   0   7   -0.09    1.98
   5   0  -7    0.26    0.87
   5  -1  -4  175.69    5.37
   5  -1  -4  185.66    5.01
   5   1  -4  182.58    5.47
  -5  -1   4  190.17    4.49
  -5  -1   4  180.36    3.37
   5   1  -4  187.78    4.55
   5   1   0  236.48    4.94
  -5  -1   0  241.52    5.19
  -5  -1   0  235.02    2.98
   5   1   0  225.70    6.42
   1   1  20 1769.03   19.87
   1  -1  20 1941.12   17.21
   1  -1  20 1954.82   16.58
  -1  -1 -20 1956.88   18.60
   1  -1  20 2216.22   15.21
   1   1  20 2265.67   16.44
  -1  -1 -20 1713.16   16.36
  -5   0  -3   -0.18    0.93
   5   0   3   -0.78    1.71
   5   0   3    0.73    0.96
  -3   2  16    2.85    0.98
  -3  -2  16    3.14    1.13
   3   2 -16    2.95    1.42
   3  -2 -16    2.88    1.36
  -4  -1 -11  205.30    6.27
  -4  -1 -11  211.32    5.17
  -4   1 -11  212.66    4.36
  -4  -1 -11  221.99    4.24
   2   3 -15    8.37    1.80
  -2   3  15    8.22    1.36
   2   3 -15    7.81    1.23
  -2  -3  15    8.33    1.37
   2  -3 -15    8.94    1.52
  -2   3  15    8.67    1.37
   2  -3 -15    7.48    1.59
  -2  -3  15    8.27    1.42
   2  -3 -15    7.85    1.26
   3  -1 -18 1172.68   12.70
  -3  -1  18 1215.39   14.73
   3   1 -18 1185.72   13.42
   3  -3 -12  243.96    4.49
   3   3 -12  217.45    5.43
  -3  -3  12  217.53    5.14
   3   3 -12  218.30    4.63
   3  -3 -12  229.13    4.73
   3  -3 -12  248.18    5.25
  -3  -3  12  205.95    4.77
  -3   3  12  232.34    5.33
   1  -4  10  618.04    8.34
  -1   4 -10  635.69    9.74
   1   4  10  641.05    9.83
   1   4  10  640.41    6.90
  -1   4 -10  638.84    7.24
  -1  -4 -10  636.20    8.91
  -2  -1  20   31.33    2.79
   2  -1 -20   31.82    2.69
   2   1 -20   34.17    2.88
  -5  -1   5  379.80    6.23
   5   1  -5  378.89    6.40
   5  -1  -5  395.84    7.02
   5  -1  -5  385.28    7.72
   5   1  -5  389.80    7.68
  -5  -1   5  387.17    5.33
   5  -1   1   38.52    2.98
   5   1   1   45.62    2.35
  -5   1  -1   49.96    1.73
  -5  -1  -1   47.27    2.48
   5   1   1   41.15    3.12
  -5  -1  -1   46.09    1.29
  -1   4  11   16.95    1.84
  -1  -4  11   17.67    1.77
   1   4 -11   15.73    2.07
  -1  -4  11   15.95    1.70
   1  -4 -11   17.18    1.55
   1   4 -11   15.19    1.76
   4  -3  -2   16.30    1.28
   4  -3  -2   19.96    2.38
   4   3  -2   14.40    2.16
  -4  -3   2   16.42    1.52
   2   4   7   64.84    2.90
  -2  -4  -7   58.50    2.94
  -2   4  -7   57.24    1.99
   2  -4   7   55.13    2.44
   2   4   7   58.58    3.46
  -2   4  -7   63.07    3.02
  -2   4  -7   50.31    3.14
  -2  -4  -7   55.02    2.71
  -4   0 -12   79.83    4.36
  -4   0 -12   73.03    2.87
   4  -3  -1  684.51    9.84
  -4  -3   1  669.36    7.95
   4  -3  -1  663.72    6.71
  -1   1  21   23.57    3.09
  -1   1  21   29.79    1.52
  -1  -1  21   27.88    2.73
   1   1 -21   27.93    2.95
   1  -1 -21   27.96    2.85
  -1  -1  21   24.04    1.35
   0  -1  21  825.73    9.47
   0   1  21  801.43   13.94
   0  -1  21  944.18    8.59
   0  -1  21  835.16   11.91
   0  -1 -21  894.53   12.40
   0   1  21 1021.54    9.61
   0   1 -21  949.00   13.47
   2   0  19    0.05    1.36
  -2   0 -19   -1.27    1.95
   2   0  19   -0.26    1.34
  -2   0 -19   -0.60    1.90
  -2   0 -19    0.16    0.89
   4  -3  -3  987.37   11.71
  -4  -3   3  957.18    9.77
  -4  -3   0   55.02    2.45
   4  -3   0   57.22    2.03
   4  -3   0   60.49    3.40
  -5   0   8    5.97    1.38
   5   0  -8    5.61    1.43
   5   0  -8    6.14    1.24
   5   0  -8    5.14    1.61
   4   2 -12  232.80    4.67
  -4  -2  12  203.81    4.41
  -4  -2  12  218.05    5.00
   4  -2 -12  227.51    5.28
   4   2 -12  212.31    5.59
   4  -2 -12  223.04    5.47
   5  -1  -6 1375.75   13.11
   5  -1  -6 1387.26   14.27
   5   1  -6 1378.42   13.88
  -5   0  -4 1071.92   10.11
   5   0   4  871.05   12.87
   5  -1   2  221.81    6.59
  -5   1  -2  254.95    3.83
   5   1   2  237.79    4.97
  -5  -1  -2  250.29    5.39
   5   1   2  229.80    6.61
  -5  -1  -2  262.85    2.93
  -4  -3   4    1.71    0.98
   4   3  -4    1.29    1.54
   4   3  -4    1.66    1.07
   4   3  -4    1.58    1.52
   4  -3  -4    1.77    1.73
  -2   4   9  190.24    5.23
   2   4  -9  185.74    4.73
   2   4  -9  185.41    4.91
   2  -4  -9  199.58    4.09
   3  -3  10   31.81    2.92
   3   3  10   35.06    2.91
  -3   3 -10   34.38    2.93
  -3  -3 -10   35.43    2.76
  -3  -3 -10   34.75    2.44
  -3   3 -10   33.78    1.73
   3  -3  10   34.56    1.72
  -4  -3  -1  271.29    5.10
   4   3   1  251.76    6.50
   4  -3   1  267.19    6.38
   4  -3   1  248.18    7.79
  -2  -2 -17   12.35    1.62
  -2  -2 -17   14.67    2.27
  -2   2 -17   14.50    1.33
   2  -2  17   13.37    1.52
  -2   2 -17   13.69    2.48
   2   2  17   13.58    2.06
   2  -2  17   12.28    2.28
   3  -2  14   28.05    2.98
  -3  -2 -14   36.39    2.99
  -3  -2 -14   28.61    2.35
   3  -2  14   29.52    1.79
  -3   2 -14   33.11    1.63
  -3  -2 -14   29.23    2.20
  -3   2 -14   32.81    3.09
   3   2  14   29.96    2.69
   3   0 -19    0.56    1.43
  -3   0  19   -0.70    1.49
  -4  -2  -9  448.72    5.91
  -4  -2  -9  434.25    7.74
   4   2   9  409.50    9.00
  -4   2  -9  409.81    4.78
  -4  -2  -9  427.15    8.62
   4  -2   9  501.66   10.66
  -4  -2  -9  493.95    8.22
  -4   2  -9  430.53    9.10
   4  -3  -5   75.49    3.59
   4   3  -5   77.78    3.04
   4  -3  -5   70.18    5.11
   4   3  -5   69.95    3.47
   4  -3  -5   75.10    3.01
  -4  -3   5   74.60    2.88
   4   3  -5   68.36    3.29
  -3  -1 -16 1101.27   11.88
  -3  -1 -16 1134.88   11.35
  -3  -1 -16 1233.49   15.37
  -3   1 -16 1125.74    8.36
  -3   1 -16 1040.61   10.77
   3   1  16 1167.99   14.58
   3  -1  16 1267.93   15.66
   3  -1  16 1081.28   11.35
   1  -3  16    0.93    2.99
   1  -3  16    4.77    1.14
   1   3  16    4.53    1.65
   1   3  16    4.68    1.45
  -1   3 -16    6.74    2.12
  -1  -3 -16    5.22    1.28
  -1  -3 -16    5.84    1.74
   4  -1 -15   55.44    3.06
  -4   1  15   45.15    3.61
   4   1 -15   55.71    3.19
  -4  -1  15   53.51    3.14
  -5  -1   7   15.77    2.27
  -5  -1   7   14.88    1.55
   5  -1  -7   15.95    2.07
   5  -1  -7   15.39    2.05
   5  -1  -7   16.53    2.12
   5   1  -7   15.33    2.28
   5   1  -7   14.38    2.11
   4  -3   2  128.64    4.66
   4  -3   2  122.02    5.70
  -4  -3  -2  133.04    3.73
   4  -3   2  126.04    2.83
   2   3  14   17.71    2.33
   2  -3  14   21.50    1.71
  -2   3 -14   17.33    1.44
  -2  -3 -14   19.97    2.25
  -2  -3 -14   16.21    1.71
   2   3  14   17.11    2.16
  -2   3 -14   18.50    2.50
   0   4  12  632.02    9.43
   0   4  12  642.51    5.94
   0  -4 -12  641.77    8.67
   0   4 -12  629.33    9.35
   0  -4  12  633.48    8.77
   0  -3 -17   39.95    2.71
   0  -3 -17   42.65    2.48
   0  -3  17   46.07    2.53
   0   3  17   44.10    2.39
   0   3 -17   42.15    3.27
   0   3  17   47.80    2.73
   0  -3 -17   41.02    2.85
   0  -3  17   41.11    2.31
   5   1   3   81.30    3.01
   5  -1   3   72.68    3.98
  -5   1  -3   88.30    2.39
   5   1   3   73.81    4.00
  -5  -1  -3   83.17    3.24
  -5  -1  -3   75.57    1.39
   2   0 -21   -0.48    1.64
  -2   0  21   -1.90    1.87
   1   0  21   -0.83    1.57
  -1   0 -21   -0.12    2.07
   1   0  21   -0.53    1.29
  -1   2 -19    2.42    1.97
   1  -2  19    2.54    1.22
  -1  -2 -19    2.72    1.13
  -1  -2 -19    4.27    1.96
   1   2  19    3.70    1.32
   1  -2  19    1.60    1.52
  -1  -2 -19    1.84    1.54
   1  -2  19    2.96    1.19
   5   0  -9    0.33    1.04
   5   0  -9   -0.50    1.19
  -5   0   9   -1.20    2.84
  -5   0   9   -0.44    1.33
   5   0  -9    0.39    1.47
   2  -4   8  388.87    6.24
  -2  -4  -8  369.58    6.95
  -2   4  -8  389.19    5.12
   2   4   8  399.79    6.39
  -2   4  -8  420.94    7.24
  -2   4  -8  358.67    7.72
  -1   4 -11    3.16    1.83
  -1   4 -11    3.31    1.45
   1   4  11    2.56    1.37
  -1  -4 -11    3.86    1.33
  -1   4 -11    4.27    1.06
   1   4  11    3.51    1.55
   1  -4  11    4.26    1.16
  -1  -3  17  316.05    6.39
   1  -3 -17  290.10    5.92
  -1   3  17  309.43    5.28
  -1  -3  17  294.31    5.28
   1   3 -17  295.82    7.30
   1  -3 -17  304.78    6.22
  -1   3  17  312.14    5.88
   1  -3 -17  316.85    6.54
   1   3 -17  299.64    5.81
   3  -3 -13  531.43    7.41
   3   3 -13  525.59    7.02
  -3   3  13  534.92    7.89
  -3  -3  13  469.65    6.98
  -3  -3  13  504.16    7.91
   3   3 -13  490.03    8.21
   3  -3 -13  540.66    7.00
  -5   0  -5    0.31    0.97
   5   0   5   -0.75    1.82
   4  -3  -6 1415.71   13.85
   4   3  -6 1295.95   13.08
  -4  -3   6 1373.66   11.95
   4   3  -6 1347.47   13.26
   4  -3  -6 1437.87   12.06
   4  -3  -6 1215.96   18.58
  -4   0  16 1490.27   15.72
   4   0 -16 1539.21   14.72
  -4  -1 -12  614.84    8.74
  -4   1 -12  608.10    7.46
  -4  -1 -12  607.82   10.62
  -2  -2  19 1717.76   15.72
   2  -2 -19 1728.27   16.03
  -2   2  19 1758.74   10.48
   2  -1  19  516.51    9.51
   2  -1  19  457.36    8.01
  -2   1 -19  505.53    6.37
  -2  -1 -19  458.95    8.11
  -2  -1 -19  512.33    9.83
   2   1  19  552.24    9.28
  -1   4  12   70.63    3.26
  -1  -4  12   70.13    3.16
   1   4 -12   65.17    3.39
   1   4 -12   65.89    3.12
   1  -4 -12   72.31    2.85
   4  -3   3  121.83    4.71
  -4  -3  -3  117.44    3.41
   4  -3   3  106.14    5.18
   4   3   3  104.54    4.41
   0   2  20   21.98    1.83
   0  -2  20   16.03    2.12
   0   2 -20   20.43    2.73
   0  -2 -20   23.00    2.61
   0  -2  20   19.74    1.96
   0  -2  20   21.46    1.66
   0  -2 -20   19.25    1.95
   1   0 -22    0.91    1.83
  -1   0  22    0.44    0.46
  -1   0  22    0.36    0.53
  -1   0  22    0.24    1.60
  -1  -2  20    8.06    1.66
  -1   2  20   13.69    1.38
   1  -2 -20   11.56    2.25
  -1  -2  20   11.01    1.63
  -1  -2  20   11.03    1.19
   1   2 -20   10.68    2.34
   2  -4 -10  670.16    7.52
   2   4 -10  644.03    8.68
  -2   4  10  643.62    9.37
   2   4 -10  640.85    8.90
   0   0 -22  150.55    5.66
   0   0  22  160.89    3.92
   5   1  -8  729.95   10.41
   5  -1  -8  818.06    9.69
  -5  -1   8  758.93    8.73
   5  -1  -8  799.52   10.40
   5   1  -8  794.87   10.19
   5  -1  -8  727.52   10.12
  -2  -3  16    0.98    1.17
  -2   3  16    0.53    1.05
   2   3 -16   -0.04    1.60
  -2  -3  16    0.65    1.01
   2   3 -16    0.45    0.98
   2  -3 -16    0.44    0.96
  -2   3  16    1.05    1.15
   2  -3 -16    0.83    1.43
   3  -4  -1  128.38    3.58
   3   4  -1  129.50    4.32
  -3  -4   1  129.82    4.28
  -3  -4   1  134.01    4.23
   3   4  -1  132.43    3.79
  -3   4   1  118.92    4.65
   3   4  -1  125.07    4.61
  -3   2  17  117.36    2.99
   3   2 -17   99.70    4.17
   3  -2 -17  110.11    4.06
  -3  -2  17   95.48    3.55
   3  -4  -2  109.16    3.39
  -3  -4   2  104.24    3.81
  -3   4   2   98.81    4.28
   3   4  -2  114.61    4.12
   3   4  -2  104.73    4.23
   3   4  -2  111.22    3.54
  -3  -4   2  105.89    3.67
   4   2 -13  157.64    3.77
  -4  -2  13  142.49    4.17
   4  -2 -13  154.78    4.53
   4   2 -13  147.03    4.78
   4  -2 -13  165.71    5.05
  -4  -2  13  137.41    3.65
  -5   1  -4   18.96    1.29
  -5  -1  -4   14.51    0.63
  -5  -1  -4   17.27    1.06
  -5  -1  -4   20.10    1.81
   5   1   4   13.73    2.17
   5  -1   4   15.88    2.28
  -3  -4   0  357.47    6.61
   3   4   0  368.20    6.30
   3  -4   0  351.56    5.74
   3   4   0  364.86    6.95
   3   4   0  348.27    7.57
  -3  -4   0  351.17    6.89
   3   0  17   -0.41    1.70
  -3   0 -17    0.40    2.07
   3   0  17   -1.06    1.70
  -3   0 -17   -0.56    1.08
  -3   0 -17   -0.96    1.10
   3  -4  -3   21.82    1.67
   3   4  -3   23.36    1.93
  -3  -4   3   23.79    2.06
   3   4  -3   22.18    2.32
  -3   4   3   20.63    2.25
  -3  -4   3   23.88    1.96
   3   4  -3   24.89    2.52
  -4   0 -13    0.55    1.85
  -4   0 -13    0.11    0.85
   4   3  -7   28.70    2.38
  -4  -3   7   28.30    1.90
   4  -3  -7   29.56    2.10
   4   3  -7   27.22    2.28
   4  -3  -7   30.73    2.62
  -3  -3 -11   43.08    2.76
   3   3  11   39.75    3.24
  -3  -3 -11   40.97    3.49
  -3   3 -11   41.22    3.39
  -3  -3 -11   42.31    3.09
   3  -3  11   40.14    1.93
  -3   3 -11   40.52    1.96
   3  -4   1  137.78    3.63
   3   4   1  137.27    5.00
  -3  -4  -1  136.38    4.41
  -3  -4  -1  142.07    4.27
   3   4   1  144.05    4.58
   3   1 -19    0.76    1.69
  -3  -1  19   -1.63    1.67
   3  -1 -19    0.98    1.48
  -3   1  19   -0.60    2.00
   5   0 -10  704.40    8.37
   5   0 -10  725.66   10.32
   4   3   4  146.91    5.19
   4  -3   4  151.31    6.02
   4  -3   4  172.02    5.47
  -4  -3  -4  172.54    4.18
  -3   4   4  152.72    5.17
  -3  -4   4  166.11    4.65
  -3  -4   4  156.72    4.59
   3   4  -4  149.82    4.86
   3   4  -4  154.27    4.68
  -4  -2 -10   76.71    3.99
  -4   2 -10   81.20    4.30
  -4   2 -10   78.58    2.34
  -4  -2 -10   88.64    3.74
   4  -2  10   85.04    4.78
   4   2  10   75.93    4.27
  -4  -2 -10   82.84    3.58
  -5   0  -6  734.05   11.88
  -5   0  -6  757.55    8.68
   3  -4   2  566.69    7.49
   3   4   2  544.51    9.68
   3   4   2  546.37    8.31
  -3  -4  -2  539.42    8.72
  -3  -4  -2  567.88    8.47
  -2   4  -9  128.38    4.75
  -2   4  -9  141.82    4.59
   2  -4   9  132.44    3.82
  -2  -4  -9  134.78    3.96
  -2  -4  -9  130.37    4.30
   2   4   9  138.16    4.04
  -2   4  -9  127.95    3.00
  -2  -1  21  125.32    5.14
   2  -1 -21  121.88    4.87
   2   1 -21  118.28    4.90
   1  -1  21  124.12    4.61
   1   1  21  119.66    5.65
   1  -1  21  140.95    5.10
   1  -1  21  148.47    4.30
  -1  -1 -21  146.96    5.66
  -5  -1   9    9.91    1.56
  -5  -1   9    7.97    1.68
   5   1  -9    9.29    1.93
   5  -1  -9    9.08    1.86
   5  -1  -9    9.07    1.67
   5   1  -9    9.71    1.74
  -3  -4   5  426.86    7.51
  -3   4   5  403.75    8.16
   3   4  -5  425.81    6.55
   3   4  -5  398.51    7.52
  -3  -4   5  416.21    7.20
  -5   1  -5    4.95    0.96
  -5  -1  -5    3.83    0.61
   5   1   5    4.87    1.84
  -5  -1  -5    4.24    1.19
  -5  -1  -5    3.56    0.36
   5  -1   5    2.72    1.72
   0  -4  13  223.34    5.22
   0   4  13  220.07    3.85
   0   4 -13  232.08    5.91
   0  -4 -13  218.58    5.22
   0   4  13  220.29    5.74
  -3  -2 -15   15.94    2.04
   3  -2  15   18.31    1.75
  -3   2 -15   19.81    2.76
  -3  -2 -15   17.10    1.80
  -3  -2 -15   19.06    2.49
  -3   2 -15   17.04    1.25
   3  -2  15   12.73    2.47
   3   2  15   16.20    2.28
   4  -3  -8    0.58    1.10
  -4  -3   8    0.88    0.87
   4   3  -8    0.96    1.38
  -4  -3   8    0.17    1.33
   4  -3  -8    0.23    1.43
   4  -3  -8    2.62    2.64
   4   3  -8    0.88    1.36
   4   1 -16  458.49    8.42
  -4  -1  16  451.38    8.82
   4  -1 -16  445.47    7.92
   1   4  12  235.87    6.37
   1  -4  12  244.26    5.34
  -1   4 -12  245.25    6.13
  -1   4 -12  230.30    6.07
  -1   4 -12  230.92    4.50
   1   4  12  238.53    4.57
  -1  -4 -12  233.06    5.60
   2   0  20  190.03    5.65
  -2   0 -20  172.56    6.17
  -2   4  11  177.24    5.03
   2   4 -11  179.90    4.82
   2  -4 -11  175.31    4.00
   2   4 -11  179.71    4.93
  -3  -4  -3   23.20    1.94
   3  -4   3   22.49    1.65
   3   4   3   24.15    2.57
  -3  -4  -3   26.47    2.39
   3   4   3   21.93    2.59
  -3  -3  14  300.74    6.36
   3  -3 -14  282.01    5.29
   3  -3 -14  302.60    5.83
   3   3 -14  302.44    5.31
   3   3 -14  286.32    6.47
  -3   3  14  303.00    5.93
  -3  -3  14  275.58    5.32
   1  -1 -22   35.72    3.15
  -1   1  22   35.71    1.58
  -1   1  22   27.51    3.31
   1   1 -22   35.39    3.33
  -1  -1  22   33.08    2.87
  -1  -1  22   29.62    1.45
   0  -1  22  181.00    4.44
   0  -1 -22  195.86    6.29
   0  -1  22  205.21    4.17
   0   1  22  212.09    4.44
   0  -1  22  181.51    5.76
   0   1  22  160.57    6.66
   0   1 -22  202.57    6.73
  -4  -3  -5   39.16    2.15
   4  -3   5   35.76    3.60
   4   3   5   32.05    2.93
  -4   3  -5   40.11    3.04
   4  -3   5   38.70    3.26
   2   3  15  103.61    4.40
   2  -3  15  110.74    3.44
  -2  -3 -15  115.22    4.35
  -2  -3 -15  110.60    4.05
   2   3  15  109.54    4.26
  -2   3 -15  106.90    3.13
  -2   3 -15  111.77    4.82
  -2   2 -18  151.76    3.67
  -2  -2 -18  152.52    5.34
  -2   2 -18  151.51    5.88
   2   2  18  159.94    5.21
   2  -2  18  124.93    5.36
   2  -2  18  143.25    4.40
  -2  -2 -18  132.30    4.47
  -3   0  20  217.92    7.03
   3   0 -20  232.19    6.24
  -1  -3 -17   10.51    2.25
   1   3  17   11.43    2.10
   1  -3  17    7.75    3.86
   1   3  17   11.94    1.92
  -1  -3 -17   10.26    1.68
  -1   3 -17    9.99    2.41
   1  -3  17   12.51    1.70
  -1   4  13    2.15    1.38
   1   4 -13    1.54    1.25
  -1   4  13    0.60    1.05
   1   4 -13    1.01    1.70
   1  -4 -13    3.60    1.17
  -1  -4  13    2.14    1.06
   3   1  17  180.31    6.05
  -3   1 -17  175.06    3.43
  -3  -1 -17  175.90    4.97
  -3   1 -17  157.51    4.42
   3  -1  17  153.89    5.85
  -3  -1 -17  172.09    4.64
  -3  -1 -17  190.97    6.36
   3  -1  17  161.56    4.83
  -3  -4   6  455.57    7.64
   3   4  -6  438.79    7.92
  -3   4   6  444.79    8.49
   3   4  -6  472.05    7.20
  -3  -4   6  462.33    7.77
  -5   0  11   -0.51    1.50
   5   0 -11    0.27    1.09
   5   0 -11    0.31    1.53
   5   0 -11    0.07    1.22
   4   2 -14  419.84    8.02
  -4  -2  14  400.60    6.02
  -4  -2  14  404.98    6.99
  -4  -1 -13   77.01    2.88
  -4  -1 -13   71.99    3.23
  -4   1 -13   69.69    2.74
  -4  -1 -13   76.39    4.31
  -4   0  17   -0.87    1.60
   4   0 -17   -0.32    1.41
   0  -3  18   60.79    2.74
   0   3 -18   67.77    4.00
   0   3  18   71.62    3.31
   0   3  18   65.92    2.86
   0  -3 -18   62.85    3.28
   0  -3 -18   67.60    3.10
   0  -3  18   76.47    3.44
   0  -3 -18   65.56    3.45
  -5   0  -7   -0.18    1.05
  -5   0  -7   -0.90    2.20
   5   0   7   -0.69    1.85
  -5  -2   2  783.86    7.17
   5   2  -2  768.80   11.35
  -5  -2   2  785.75    9.99
  -1  -3  18  103.50    3.27
   1   3 -18   99.19    3.50
  -1   3  18  114.93    3.68
   1  -3 -18  113.12    3.97
  -1   3  18  109.04    3.41
   1  -3 -18  112.42    4.22
   1   3 -18  108.10    4.86
  -5  -2   3   29.83    2.17
   5   2  -3   26.55    2.62
   5  -2  -3   28.49    2.76
  -5  -2   3   28.26    1.56
  -5   1  10  450.19    9.08
   5   1 -10  459.28    8.54
   5  -1 -10  443.77    8.04
   5  -1 -10  485.67    7.90
   5   1 -10  482.67    7.56
  -5  -1  10  460.80    7.65
  -3  -4  -4  964.95   10.68
  -3   4  -4  921.26   12.59
   3  -4   4 1020.91    9.83
   3   4   4  970.87   11.10
   3   4   4  919.80   12.53
  -3  -4  -4  967.79   11.64
  -5  -2   1    6.37    1.35
  -5  -2   1    6.37    0.94
   5  -2  -1    6.48    1.95
   5   2  -1    4.53    1.93
  -4  -3   9   17.94    2.04
   4  -3  -9   20.45    2.02
   4  -3  -9   22.27    1.82
  -4  -3   9   19.22    1.67
   4  -3  -9   17.15    2.06
   4   3  -9   19.67    2.02
   4   3  -9   20.29    2.06
  -5  -1  -6  472.19    3.08
  -5   1  -6  544.48   10.34
  -5  -1  -6  443.75    3.78
  -5  -1  -6  577.73    8.36
   5   1   6  490.06    9.80
  -5   1  -6  593.87    6.57
   5  -1   6  578.13   10.91
  -5  -2   4   75.36    2.43
   5  -2  -4   68.64    3.86
  -5  -2   4   76.80    3.28
   5   2  -4   69.64    3.65
  -3   3 -12 2225.56   12.81
  -3  -3 -12 2305.17   18.55
  -3   3 -12 2302.54   19.90
  -3  -3 -12 2404.61   19.41
   3  -3  12 2440.98   14.50
  -5  -2   0  116.10    4.06
   5   2   0  108.96    4.67
   5  -2   0  114.36    5.08
  -5  -2   0  116.89    2.74
  -2   3  17    0.01    1.28
   2  -3 -17    0.14    0.96
   2  -3 -17    0.75    1.58
   2   3 -17    0.20    1.54
  -2   3  17    0.26    1.07
  -2  -3  17   -0.01    1.16
  -2  -3  17    0.28    1.03
   2   3 -17   -0.07    1.05
   1  -2  20   38.18    2.36
  -1  -2 -20   39.02    3.20
  -1  -2 -20   39.31    2.60
  -1  -2 -20   35.33    2.83
   1   2  20   41.85    2.62
   1  -2  20   39.87    2.61
  -1   2 -20   40.38    3.50
  -2   4 -10  137.63    3.17
  -2  -4 -10  148.39    4.32
  -2  -4 -10  140.44    4.56
   2  -4  10  131.30    3.81
  -2   4 -10  146.34    4.82
   2   4  10  137.84    4.08
   2   0 -22  953.10   13.00
  -2   0  22  874.06   14.22
   0  -5   0    0.07    0.80
   0  -5   0    0.18    0.91
   0   5   0    0.23    0.99
   0   5   0    0.04    1.31
  -4   2 -11    1.18    2.05
  -4  -2 -11    1.66    1.18
  -4  -2 -11    1.61    1.91
  -4  -2 -11    1.15    1.45
  -4   2 -11    1.35    0.82
  -3  -2  18  102.22    4.01
   3  -2 -18  106.73    4.12
   3   2 -18  101.71    4.39
   0  -5   1   20.19    1.59
   0  -5  -1   19.37    1.63
   0   5   1   20.21    2.27
   0   5   1   20.32    1.73
   0  -5  -1   19.98    1.84
   0   5  -1   20.10    2.23
   0  -5   1   20.87    1.93
   0   5  -1   20.71    1.74
   3   4  -7   74.59    3.11
  -3   4   7   69.80    3.60
  -3  -4   7   71.53    3.14
   3   4  -7   68.92    3.28
  -3  -4   7   74.27    3.29
   2  -2 -20  312.04    7.24
  -2   2  20  318.01    4.50
  -2  -2  20  294.01    6.62
   2   2 -20  283.68    7.29
  -4   3  -6  481.23    9.11
  -4  -3  -6  469.52    6.79
   1   0  22  475.98    7.85
  -1   0 -22  430.99    9.51
  -4   0 -14   75.83    3.08
  -4   0 -14   73.16    1.92
   4   0  14   76.68    4.33
   5  -2  -5    0.64    1.36
  -5  -2   5    0.45    1.00
   5   2  -5    0.41    1.61
  -5  -2   5    0.28    0.80
  -5  -2  -1   14.70    1.17
   5  -2   1   15.21    2.45
  -5  -2  -1   15.37    1.77
   5   2   1   13.19    2.27
   0  -5  -2    6.44    1.15
   0  -5   2    6.80    1.15
   0   5  -2    6.66    1.29
   0  -5  -2    6.68    1.33
   0   5   2    7.20    1.71
   0   5  -2    6.66    1.65
   0  -5   2    6.30    1.32
  -2  -1 -20   10.51    1.70
   2  -1  20   10.02    1.84
   2  -1  20   11.69    2.12
   2   1  20   11.28    2.14
  -2  -1 -20   11.14    2.45
  -1  -2  21   33.06    2.49
   1   2 -21   36.97    3.37
  -1   2  21   38.64    1.98
  -1  -2  21   35.07    1.73
  -1  -2  21   27.87    2.16
   1  -2 -21   41.69    3.19
   0  -2 -21   25.24    2.80
   0  -2  21   17.19    2.21
   0  -2  21   21.36    2.18
   0  -2  21   22.66    1.74
   0  -2 -21   21.76    2.13
   0   2 -21   24.83    3.01
   0   2  21   24.52    1.92
   3  -4   5  332.53    5.56
  -3  -4  -5  332.38    6.36
  -3  -4  -5  320.76    6.82
   3   4   5  341.18    6.82
   3   4   5  325.07    7.59
  -3   4  -5  321.50    7.76
   2   4 -12  267.90    6.22
   2   4 -12  263.86    5.83
   2  -4 -12  273.46    5.19
  -2   4  12  264.04    6.14
  -3   0 -18  108.97    3.90
   3   0  18  101.78    4.39
   3   0  18  121.07    5.10
  -3   0 -18  134.02    3.58
  -3   0 -18  126.96    5.45
   0  -5  -3    0.66    0.94
   0   5  -3    0.82    1.38
   0  -5   3    0.64    0.86
   0   5   3    0.02    1.41
   0  -5   3    1.11    1.04
   0   5  -3    0.88    1.11
   0  -5  -3    0.52    1.04
   0  -4  14  957.62   11.07
   0  -4 -14  916.41   10.59
   0   4 -14  972.25   11.78
   0   4  14  941.78    7.92
   0   4  14  925.34   11.44
   3   1 -20  278.71    6.91
   3  -1 -20  280.94    6.75
  -3  -1  20  267.31    7.29
   5   2  -6  317.30    7.20
   5  -2  -6  321.57    7.56
   5   2  -6  345.31    7.28
  -5  -2   6  325.20    6.34
  -5  -2   6  330.72    5.33
  -1   0  23    0.25    0.53
  -1   0  23    0.20    0.47
   1   0 -23    0.45    1.95
  -1   0  23   -0.26    1.55
  -5   0  12  532.51    9.62
   5   0 -12  513.56    8.67
   1  -4  13   52.24    2.65
  -1   4 -13   52.68    3.36
  -1   4 -13   48.73    2.22
  -1   4 -13   44.92    2.99
   1   4  13   50.52    3.24
  -1  -4 -13   48.28    2.75
   1   4  13   48.19    2.46
  -5  -2  -2  165.19    3.21
  -5  -2  -2  158.08    4.78
   0   0  23    0.23    1.03
   0   0  23    0.55    1.57
   0   0  23    0.41    1.10
   0   0 -23    0.40    2.01
   5  -1 -11  147.11    4.40
   5   1 -11  141.13    4.14
   5  -1 -11  134.94    4.66
  -5  -1  11  143.58    4.59
   5   1 -11  140.52    4.90
   3  -3 -15  639.81    8.31
  -3  -3  15  598.05    7.63
  -3   3  15  620.03    8.31
   3   3 -15  604.67    9.61
   3  -3 -15  655.42    8.72
  -3  -3  15  645.59    9.32
   3   3 -15  657.83    7.76
  -5   0  -8  567.35    7.90
  -5   0  -8  550.34   10.73
   4  -3 -10  104.38    4.28
  -4  -3  10  102.28    3.52
   4  -3 -10  106.92    3.80
   4   3 -10  102.86    3.72
   4   3 -10   96.17    3.84
   4  -3 -10  109.65    3.53
  -4   1  17   17.50    2.79
   4   1 -17   25.03    2.48
   4  -1 -17   24.00    2.35
  -4  -1  17   23.28    2.61
  -3   4   8   16.21    2.16
  -3  -4   8   15.74    1.65
   3   4  -8   16.90    1.92
   3   4  -8   18.61    1.96
  -3  -4   8   15.25    1.75
  -5  -1  -7   66.18    3.08
  -5   1  -7   61.35    4.06
   5  -1   7   63.41    4.05
  -5   1  -7   65.56    2.42
  -5  -1  -7   51.88    1.45
   5   1   7   54.11    3.71
  -5  -1  -7   64.09    3.94
  -5  -1  -7   51.22    1.10
   1   4 -14  622.75    9.05
  -1  -4  14  641.67    9.37
   1  -4 -14  661.35    8.73
  -1   4  14  699.03    6.64
  -1   4  14  678.78    9.63
   1   4 -14  616.35   10.15
   0  -5  -4  189.77    5.12
   0  -5   4  181.49    4.09
   0   5  -4  182.77    5.58
   0  -5   4  189.87    5.15
   3  -2  16    0.53    1.82
   3   2  16    1.35    1.60
   3  -2  16   -0.19    1.14
  -3   2 -16    0.94    2.09
  -3  -2 -16    0.62    1.10
  -3  -2 -16    0.56    1.45
  -3  -2 -16    0.45    1.86
  -3   2 -16    0.61    0.74
  -1  -5   0  178.49    5.11
  -1   5   0  175.95    3.94
  -1  -5   0  166.52    4.49
  -1   5   0  161.20    5.37
   1  -5   0  168.56    3.79
   1   5   0  165.76    5.26
   1  -5   0  165.31    4.63
   1  -5  -1  180.90    4.80
   1   5  -1  175.85    5.46
  -1  -5   1  199.83    5.37
  -1   5   1  194.40    4.17
   1  -5  -1  195.93    4.27
  -1  -5   1  200.61    5.02
   4  -2 -15   33.39    2.51
  -4  -2  15   27.89    1.92
  -4  -2  15   27.23    2.11
   4   2 -15   31.06    2.65
  -4  -3  -7  175.31    4.19
   4   3   7  164.14    5.77
   4  -3   7  156.16    6.53
  -4  -3  -7  157.17    5.01
  -4   3  -7  182.68    5.86
   5  -2  -7  186.10    5.75
   5  -2  -7  194.84    5.36
  -5  -2   7  195.95    4.34
   5   2  -7  185.52    5.26
   5   2  -7  181.17    5.41
   1   5   1  400.85    8.12
  -1   5  -1  405.76    8.22
  -1  -5  -1  405.56    6.99
   1  -5   1  410.69    7.27
   1  -5   1  403.69    5.70
  -1  -5  -1  398.14    7.40
   1  -5  -2  112.08    3.79
  -1   5   2  120.57    3.30
   1   5  -2  118.71    4.48
   1  -5  -2  119.76    3.33
  -1  -5   2  116.93    3.75
   1   5  -2  105.33    1.99
  -1  -5   2  123.72    4.27
   5  -2   3    1.84    1.83
  -5  -2  -3    2.10    1.14
   5   2   3    2.79    1.96
  -5  -2  -3    2.02    0.75
  -2  -1  22   22.65    2.61
   2   1 -22   23.97    2.78
   2  -1 -22   23.86    2.69
   3   4   6    1.09    1.59
   3   4   6    0.51    1.85
  -3  -4  -6    0.61    0.98
  -3   4  -6    0.69    1.57
   3  -4   6    0.31    0.85
  -3  -4  -6    0.90    1.22
  -3   4  -6   -0.60    1.74
  -3   4  -6    0.14    0.35
  -2   3 -16   95.26    4.70
   2  -3  16   99.25    3.45
  -2  -3 -16   98.05    3.91
  -2  -3 -16  104.28    4.44
   2  -4  11  376.29    6.48
  -2   4 -11  360.56    7.93
   2   4  11  372.87    8.27
  -2   4 -11  407.83    7.92
   2   4  11  394.11    6.71
  -2  -4 -11  389.26    7.60
  -2   4 -11  372.12    5.21
   1  -1  22 1578.86   15.04
   1  -1  22 1597.06   13.72
  -1  -1 -22 1618.64   17.83
   1  -1  22 1559.99   16.35
  -1   5  -2   53.72    2.32
  -1  -5  -2   46.61    2.71
   1   5   2   47.87    3.14
   1  -5   2   49.21    2.06
   1  -5   2   51.06    2.87
  -1  -5  -2   50.52    2.67
  -1   5  -2   47.41    3.22
  -4  -1 -14   39.95    2.19
   4   1  14   36.40    3.36
  -4   1 -14   37.07    2.21
  -4  -1 -14   41.99    3.54
  -4   1 -14   36.38    1.41
  -4  -1 -14   37.86    2.48
   4  -1  14   43.12    3.59
   1   5  -3    2.43    0.83
   1  -5  -3    1.75    1.05
  -1   5   3    1.51    1.01
  -1  -5   3    2.01    1.25
   1   5  -3    1.92    0.83
   1  -5  -3    1.83    0.93
  -1  -5   3    1.98    1.05
   1   5  -3    1.04    1.39
   4   0 -18   72.84    3.64
  -4   0  18   71.39    4.08
   0   5  -5   68.86    3.57
   0  -5  -5   70.28    3.33
   0  -5  -5   71.85    2.97
   0  -5   5   71.74    3.26
   1  -3  18 1922.30   15.22
   1   3  18 1754.00   15.66
  -1  -3 -18 1884.70   16.19
  -1  -3 -18 1904.20   16.90
  -1   3 -18 1678.33   18.21
  -3  -3 -13  163.64    5.38
  -3   3 -13  155.12    3.53
   3   3  13  130.26    5.11
  -3   3 -13  167.90    6.02
  -3  -3 -13  159.18    5.16
   3  -3  13  173.88    3.99
   3  -3  13  116.78    6.06
  -4  -2 -12  285.60    6.18
  -4  -2 -12  289.62    6.67
  -4   2 -12  293.81    7.91
  -4   2 -12  274.47    4.63
  -4  -2 -12  288.24    7.37
  -4   2 -12  284.54    3.75
   2  -2  19   58.59    3.20
  -2  -2 -19   63.27    3.83
  -2   2 -19   61.27    4.17
   2  -2  19   57.96    4.05
   2   2  19   58.99    3.52
  -3   0  21   -0.11    1.67
   3   0 -21   -0.50    1.58
   2   0  21    0.05    1.66
   2   0  21   -0.76    1.55
  -2   0 -21    0.27    2.06
  -3   1 -18  323.15    6.38
  -3   1 -18  369.62    5.07
   3  -1  18  310.86    6.43
   3   1  18  389.83    8.65
  -3  -1 -18  384.47    8.91
  -3  -1 -18  354.61    7.13
  -3  -1 -18  369.81    6.54
   3  -1  18  417.83    9.35
   3   4  -9   11.73    1.74
  -3   4   9   11.56    1.93
   3   4  -9   10.84    1.70
  -3  -4   9   11.81    1.60
  -1  -5  -3  393.58    7.42
  -1  -5  -3  429.62    7.35
  -1   5  -3  426.95    6.14
   1   5   3  420.16    8.35
  -1   5  -3  403.23    8.40
   1  -5   3  419.65    7.30
   5   2  -8   13.83    1.96
   5  -2  -8   15.96    2.07
   5   2  -8   15.42    2.11
  -5  -2   8   13.23    1.96
  -5  -2   8   15.04    1.52
   5  -2  -8   13.60    2.12
   0   3  19   87.80    3.31
   0  -3  19   85.73    3.16
   0  -3  19   99.23    3.79
   0   3 -19   94.28    4.66
   0   3  19   95.54    3.77
   0  -3 -19   87.30    4.01
   0  -3 -19   94.36    3.72
   1   5  -4    0.41    1.44
   1  -5  -4    0.90    0.98
  -1  -5   4    0.35    1.24
  -1  -5   4    0.84    1.05
   1  -5  -4    0.67    1.13
  -1   5   4    0.26    1.53
   1   5  -4    0.33    1.06
  -1   5   4    1.15    1.09
   2  -4 -13  472.77    6.96
  -2   4  13  466.13    8.08
   2   4 -13  460.61    7.59
   2   4 -13  477.19    8.43
   1   1 -23    3.86    2.26
  -1   1  23    3.58    0.86
  -1   1  23    3.03    2.21
  -1  -1  23    3.39    0.80
   1  -1 -23    3.58    2.08
  -1  -1  23    2.26    1.61
  -4  -3  11    1.72    1.43
   4  -3 -11    3.27    1.38
  -4  -3  11    3.54    1.13
   4   3 -11    2.53    1.60
   4   3 -11    2.46    1.29
   5  -1 -12  610.70    9.43
  -5   1  12  597.76   10.94
  -5  -1  12  647.83    9.83
   5   1 -12  641.93   10.02
   5   0 -13    0.30    1.49
  -5   0  13   -0.25    1.42
  -5  -2  -4    4.68    1.43
   5  -2   4    3.58    2.04
   5   2   4    3.48    1.96
  -5  -2  -4    4.12    0.81
  -1  -3  19  261.17    5.01
   1  -3 -19  283.59    6.30
  -1   3  19  273.16    5.24
  -1  -3  19  300.99    6.62
   1   3 -19  259.61    5.54
  -1   3  19  285.84    5.60
   1  -3 -19  297.29    6.68
   1   3 -19  291.35    7.82
   0  -1  23   69.33    2.97
   0  -1  23   74.98    2.69
   0   1  23   76.35    2.88
   0  -1  23   67.48    3.85
   0  -1 -23   74.69    4.31
   0   1 -23   72.27    4.44
  -2   3  18  284.28    5.30
  -2   3  18  279.61    5.49
   2  -3 -18  269.48    5.95
   2   3 -18  276.31    7.12
  -2  -3  18  277.80    5.18
   2  -3 -18  257.75    6.21
  -5  -1  -8   24.84    0.88
  -5  -1  -8   32.65    2.35
  -5   1  -8   32.66    1.94
  -5  -1  -8   27.83    3.07
   5  -1   8   31.79    3.20
  -5  -1  -8   23.87    1.11
  -5   1  -8   30.91    3.38
   5   1   8   25.68    2.92
  -5   0  -9   -0.03    2.15
  -5   0  -9    0.61    1.06
   5   0   9   -0.36    1.88
  -4   0 -15    0.38    2.05
  -4   0 -15   -0.19    0.66
   4   0  15   -0.24    1.69
  -4   0 -15    0.15    0.98
   3  -2 -19  698.08   10.27
   3   2 -19  660.25   10.72
   0   5  -6  480.98    5.44
   0   5  -6  486.06    8.71
   0  -5  -6  506.70    8.45
   0  -5   6  500.90    8.13
   0  -5  -6  509.00    7.64
  -3  -4  -7    3.86    1.23
  -3   4  -7    3.95    1.88
   3   4   7    4.27    2.03
   3  -4   7    4.45    1.03
   3   4   7    4.36    1.82
  -3  -4  -7    4.02    1.38
  -3   4  -7    3.05    0.58
  -1  -5  -4   11.34    1.68
   1   5   4    8.70    1.90
  -1   5  -4   11.84    1.43
  -1   5  -4    9.68    1.92
   1  -5   4   10.69    1.58
  -4  -3  -8   13.73    1.46
  -4   3  -8    5.92    0.41
  -4   3  -8    6.81    0.44
   4   3   8   13.52    2.39
   4  -3   8   14.01    2.94
  -4  -3  -8   13.13    1.82
  -4   3  -8   15.20    2.46
  -1  -5   5 1020.73   11.83
   1  -5  -5 1000.86   11.49
   1   5  -5  958.30    8.36
   1  -5  -5 1036.45   10.06
  -1   5   5  968.62   12.74
  -1  -5   5  976.21   10.26
   1   5  -5  988.98   12.37
  -1   5   5 1005.60    9.85
  -1   4 -14  452.03    8.59
   1   4  14  452.62    6.60
   1   4  14  446.90    8.57
  -1  -4 -14  444.68    7.86
  -1   4 -14  433.46    6.29
   1  -4  14  444.18    7.23
   0  -4  15  196.43    5.03
   0   4 -15  174.21    5.17
   0   4 -15  177.20    5.64
   0  -4 -15  198.02    5.21
   0   4  15  188.85    3.88
   0   4  15  186.49    5.35
   2  -2 -21  368.27    8.08
   2   2 -21  351.48    8.33
  -1   2 -21   39.39    3.58
   1  -2  21   39.16    2.84
   1  -2  21   41.59    2.46
   1   2  21   43.44    2.72
  -1  -2 -21   37.52    2.64
   1  -2  21   37.00    3.16
  -1  -2 -21   38.67    3.27
  -3  -3  16    1.39    1.17
   3   3 -16    0.27    1.71
  -3   3  16    0.82    1.27
   3  -3 -16    0.61    1.15
  -3  -3  16   -0.32    1.43
   3  -3 -16    0.08    1.72
   5   2  -9  495.20    8.06
  -5  -2   9  497.07    7.10
   5  -2  -9  477.79    8.82
   5   2  -9  497.51    9.00
   5  -2  -9  503.65    8.36
  -5  -2   9  466.57    7.79
  -2   0  23   -2.34    2.42
   2   0 -23    0.02    2.04
   1   4 -15   53.95    2.98
   1   4 -15   51.38    3.68
  -1   4  15   56.29    3.09
   1  -4 -15   61.67    2.94
  -1  -4  15   56.57    2.98
  -1   4  15   59.88    2.31
  -5  -2  -5  218.53    3.71
   5   2   5  197.58    6.62
  -5  -2  -5  201.87    5.45
  -3  -4  10   16.36    1.80
  -3   4  10   17.42    2.16
   3   4 -10   16.50    1.92
   3   4 -10   17.25    1.99
   4  -1 -18  352.94    7.44
  -4  -1  18  368.83    8.41
   4   1 -18  356.78    7.78
   4  -2 -16  156.25    4.83
   4   2 -16  147.16    5.00
  -4  -2  16  156.21    4.75
  -1   5  -5   20.39    1.67
  -1   5  -5   12.40    1.05
   1   5   5   18.01    2.35
  -1   5  -5   18.79    2.29
   1  -5   5   18.84    1.84
  -1  -5  -5   18.83    1.81
  -3   0 -19    0.94    1.09
  -3   0 -19   -0.22    2.12
   3   0  19    0.02    1.58
  -3   0 -19    0.05    0.90
   3   0  19   -0.76    1.78
   2   4  12  540.06    9.97
   2  -4  12  550.07    7.60
  -2   4 -12  581.92    6.76
  -2  -4 -12  548.60    9.00
   2   4  12  598.02    8.53
  -2   4 -12  555.25    9.32
   1   0  23   -1.14    1.52
  -1   0 -23   -1.10    2.40
   1   0  23    0.92    1.82
  -1  -5   6 1141.88   10.96
   1   5  -6 1138.89   13.43
   1  -5  -6 1186.59   10.74
  -1   5   6 1161.06   10.78
   1   5  -6 1159.50    9.73
   1  -5  -6 1154.59   12.10
  -1  -5   6 1204.12   13.04
  -1   5   6 1143.07   13.82
  -3  -1  21   39.84    3.32
   3   1 -21   45.26    3.28
   3  -1 -21   45.60    3.20
  -2  -1 -21    8.91    2.42
   2  -1  21    5.91    1.91
   2  -1  21    6.89    1.71
  -2  -1 -21    7.67    1.57
   2   1  21    8.04    1.87
  -1   2  22    2.08    1.02
  -1  -2  22    2.82    1.38
  -1  -2  22    1.15    1.29
   1  -2 -22    3.27    2.11
   1   2 -22    1.97    2.12
  -1  -2  22    1.72    0.94
   0  -5   7    2.70    1.24
   0  -5  -7    2.02    1.19
   0  -5  -7    2.44    1.17
   0   5  -7    1.68    1.42
   0   5  -7    1.84    1.55
   0   5   7    1.79    1.55
   0  -2  22  207.32    4.47
   0  -2 -22  177.90    5.48
   0   2  22  229.48    5.05
   0  -2 -22  225.96    6.64
   0  -2  22  182.12    5.49
   0  -2  22  214.62    6.09
   0   2 -22  223.47    7.18
   4   3 -12  268.36    5.65
   4  -3 -12  275.05    5.70
  -4  -3  12  266.48    5.93
   4   3 -12  252.56    6.27
   5  -1 -13  137.55    4.70
  -5   1  13  129.15    5.55
   5   1 -13  139.19    4.90
   3  -2  17   25.98    3.18
  -3  -2 -17   26.55    2.88
   3   2  17   23.53    2.67
   3  -2  17   23.88    2.19
  -3   2 -17   25.58    3.12
  -3   2 -17   23.66    1.54
  -3  -2 -17   23.78    2.18
   3   4   8  123.78    5.12
  -3   4  -8  139.10    4.78
   3   4   8  136.82    4.68
   3  -4   8  136.31    3.73
  -3  -4  -8  131.51    4.63
  -3  -4  -8  125.40    4.15
  -5   0  14   14.58    2.11
   5   0 -14   12.83    1.98
  -4  -2 -13   -0.03    1.29
  -4   2 -13    0.02    0.87
  -4  -2 -13   -0.31    1.26
  -4  -2 -13   -0.26    1.93
  -4   2 -13   -0.25    0.65
  -4   2 -13   -0.05    2.15
   5   1   9  611.27   11.60
  -5  -1  -9  685.48   12.01
  -5  -1  -9  678.95    9.41
   5  -1   9  723.29   12.85
  -5  -1  -9  587.64    4.25
  -5   1  -9  680.50    7.73
  -5   1  -9  692.77   12.52
  -4  -1 -15  552.21    8.54
  -4   1 -15  594.14    8.03
   4   1  15  628.20   11.71
  -4  -1 -15  584.22    7.12
   4  -1  15  679.80   12.42
  -4   1 -15  568.37    5.19
  -4  -1 -15  628.24   11.47
  -2   3 -17  388.65    9.00
  -2  -3 -17  392.96    7.76
   2  -3  17  389.92    6.62
  -3   3 -14  101.96    5.04
   3  -3  14   97.99    3.16
  -3  -3 -14   95.11    4.33
  -3   3 -14   88.38    2.73
   3  -3  14   63.94    4.83
  -3  -3 -14   83.90    3.81
   3   3  14   75.92    4.05
   2  -4 -14  256.48    5.37
  -2   4  14  244.17    5.95
   2   4 -14  247.94    6.30
  -2  -4  14  240.95    5.88
   2   4 -14  236.83    5.56
   1   0 -24    7.02    2.30
  -1   0  24    7.62    2.20
  -1   0  24    6.56    0.74
  -4  -3  -9    3.59    1.08
   4  -3   9    2.74    2.11
  -4  -3  -9    3.36    1.86
   4   3   9    4.04    1.97
  -4  -3  -9    3.81    1.32
  -4   3  -9    2.30    0.47
  -4   3  -9    4.11    2.07
   5   0  10    7.12    2.22
  -5   0 -10    8.34    1.46
  -5   0 -10    9.07    2.56
  -5  -2  10    5.94    1.27
  -5  -2  10    5.07    1.68
   5  -2 -10    5.07    1.95
   5   2 -10    6.41    1.74
   5  -2 -10    7.99    1.89
   5   2 -10    7.30    1.96
  -1   5  -6  179.19    5.70
  -1  -5  -6  181.04    4.93
  -1   5  -6  194.35    4.34
   1  -5   6  186.47    4.99
   4   0 -19   -0.19    1.50
  -4   0  19    0.38    1.64
   0   0 -24   33.85    3.29
   0   0  24   35.36    1.97
   0   0  24   35.13    2.14
   0   0  24   26.64    2.87
  -5  -2  -6  146.94    3.08
  -5  -2  -6  134.95    4.47
   5   2   6  130.48    5.61
   5  -2   6  161.63    6.51
  -5   2  -6  137.26    5.52
  -5   2  -6  111.01    1.97
  -1   5   7  323.07    7.58
   1   5  -7  313.18    5.69
   1  -5  -7  345.31    6.04
  -1  -5   7  346.32    7.13
   1   5  -7  332.48    7.27
   1   3  19   96.04    4.01
  -1  -3 -19  105.77    4.62
  -1  -3 -19   99.13    4.05
  -1   3 -19  100.35    5.17
   1  -3  19  100.99    3.82
  -3   4  11   77.65    3.65
   3   4 -11   80.77    3.54
   3   4 -11   82.97    3.44
  -3  -4  11   75.88    3.39
  -2  -1  23   60.18    3.94
   2  -1 -23   62.71    3.91
   2   1 -23   66.09    4.12
   0   5  -8  173.59    5.40
   0   5  -8  190.82    4.35
   0  -5   8  183.91    5.09
   0  -5  -8  189.07    4.93
   0   5   8  177.64    5.61
  -3  -1 -19   65.75    3.30
  -3  -1 -19   66.93    2.96
   3   1  19   76.98    4.24
   3  -1  19   76.98    4.39
   3  -1  19   58.61    3.26
  -3  -1 -19   76.19    4.51
  -3   1 -19   68.57    2.36
  -3   1 -19   55.64    2.89
   2   3 -19    0.97    1.81
  -2   3  19   -0.26    1.10
   2  -3 -19    0.27    1.06
  -2  -3  19   -0.07    1.21
   2  -3 -19   -0.43    1.88
  -2  -3  19    0.26    1.24
  -2   2 -20  159.39    6.36
  -2  -2 -20  173.24    5.99
   2   2  20  176.43    5.68
   2  -2  20  156.91    5.09
   2  -2  20  188.19    6.75
  -3   0  22  306.65    8.68
   3   0 -22  349.42    8.28
   1   4  15  487.59    7.03
  -1   4 -15  473.89    9.05
   1  -4  15  479.65    7.82
   1   4  15  470.59    8.86
  -1  -4 -15  476.28    8.23
   2   5  -1    3.58    1.83
  -2   5   1    4.73    1.11
  -2  -5   1   13.13    1.89
   2   5  -1    4.16    1.88
   2  -5  -1    4.48    1.33
  -2  -5   1   14.98    1.97
   1  -1  23   29.42    3.00
   1  -1  23   31.23    2.61
  -1  -1 -23   35.76    3.67
   1   1  23   27.34    3.69
   1   1  23   36.15    2.70
   1  -1  23   27.46    2.39
   0   3 -20   15.83    2.71
   0   3  20   14.88    1.91
   0  -3  20   12.92    1.64
   0  -3  20   13.69    1.80
   0  -3  20    7.46    2.73
   0  -3 -20   14.23    1.80
   0  -3 -20   12.60    2.39
  -4   0 -16  218.67    7.26
   4   0  16  207.23    7.07
  -4   0 -16  184.16    3.29
  -4   0 -16  189.59    4.92
   2  -5   0 1354.20   12.80
  -2  -5   0 1332.24   13.40
  -2   5   0 1537.43   10.17
   2   5   0 1323.24   14.68
  -2  -5   0 1372.59   14.09
   2   5   0 1605.65    9.78
  -1   3  20    1.79    1.23
  -1  -3  20    2.59    1.22
  -1  -3  20    2.74    1.31
   1  -3 -20    2.56    1.27
   1  -3 -20    1.43    1.92
   1   3 -20    1.53    2.18
   0  -4  16    3.75    1.26
   0   4  16    3.91    1.57
   0  -4 -16    3.70    1.33
   0   4 -16    2.97    1.56
   0   4  16    4.61    1.29
   0   4 -16    3.66    2.12
  -2  -5   2   92.01    3.87
  -2  -5   2   97.23    3.80
  -2   5   2   88.58    4.34
   2   5  -2  107.57    2.85
   2  -5  -2   90.65    3.42
  -2   5   2  101.00    2.80
   2   5  -2   95.74    4.31
   3   3 -17  688.77   10.86
   3  -3 -17  741.54   10.07
  -3  -3  17  685.45    8.02
  -3   3  17  691.95    8.64
  -3  -3  17  762.36   11.11
   3   2 -20   23.26    2.70
  -3  -2  20   21.36    2.31
   3  -2 -20   24.82    2.70
  -2  -5  -1    1.89    1.32
   2   5   1    1.86    1.27
   2   5   1    1.51    1.70
   2  -5   1    2.40    1.23
  -2  -5  -1    2.47    1.40
  -1   5  -7   29.49    1.92
  -1  -5  -7   28.78    2.29
  -1   5  -7   28.59    1.98
  -1   5  -7   25.35    2.67
   1  -5   7   29.28    2.27
   4  -3 -13   17.08    1.95
   4   3 -13   15.88    2.20
  -4  -3  13   16.88    1.84
  -4  -3  13   13.52    1.88
   4  -3 -13   22.35    4.40
   2   0  22   35.26    2.84
  -2   0 -22   37.02    3.58
   2   0  22   32.65    3.23
   3   4   9    1.13    2.12
  -3  -4  -9    0.25    1.09
   3   4   9   -0.33    2.00
  -3  -4  -9    0.08    1.26
   3  -4   9    0.32    0.95
  -3   4  -9   -0.02    2.03
   2   5  -3   40.52    2.91
  -2  -5   3   37.57    2.48
  -2   5   3   36.91    2.98
   2   5  -3   47.71    2.17
   2  -5  -3   41.48    2.51
  -2   4 -13   55.83    2.25
   2   4  13   56.31    3.12
  -2   4 -13   56.22    3.57
  -2  -4 -13   57.12    3.23
   2  -4  13   55.28    2.66
   2   4  13   51.26    3.51
   1  -4 -16  509.91    8.00
  -1  -4  16  515.41    8.62
  -1   4  16  503.12    8.35
   1   4 -16  525.01    9.78
  -1   4  16  522.46    6.28
  -5  -2  11  598.64    8.54
  -5  -2  11  600.96    8.04
   5  -2 -11  630.82    9.24
   5  -2 -11  571.14    9.40
   5   2 -11  628.17   10.04
   1  -5  -8   27.64    2.00
   1   5  -8   23.26    2.23
   1   5  -8   22.36    2.30
  -1   5   8   27.77    2.64
  -1  -5   8   24.68    2.15
   5  -1 -14   98.64    4.08
  -5  -1  14  103.77    4.30
   5   1 -14  104.18    4.33
  -4  -2  17   17.41    1.94
   4   2 -17   18.91    2.38
   4  -2 -17   18.80    2.17
  -2  -5  -2   51.44    2.89
  -2  -5  -2   53.10    2.91
   2  -5   2   52.63    2.73
  -2   5  -2   53.72    3.53
   2   5   2   53.98    3.41
   2   5   2   61.82    2.02
  -5  -2  -7   95.12    3.94
   5   2   7   94.27    4.91
  -5   2  -7   99.08    4.91
  -5   2  -7   88.58    2.02
  -1  -1  24   24.64    1.39
   1  -1 -24   26.67    3.01
  -1   1  24   27.01    1.41
  -1   1  24   19.60    3.27
   1   1 -24   27.78    3.31
  -1  -1  24   21.76    2.62
  -5   1 -10 1676.10   19.05
  -5  -1 -10 1733.85   18.99
  -5  -1 -10 1688.94   14.95
  -5  -1 -10 1513.02    7.66
  -5   1 -10 1770.96   13.04
   5  -1  10 1839.54   20.44
   5   1  10 1618.13   18.74
  -2   5   4    1.07    1.55
  -2  -5   4    1.34    1.16
   2  -5  -4    0.60    1.04
   2   5  -4    1.03    1.19
   2   5  -4    1.55    1.54
   4   1 -19   23.97    2.65
  -4   1  19   18.06    3.03
   4  -1 -19   24.87    2.62
  -4  -1  19   21.38    2.68
  -5   0  15   -0.44    1.52
   5   0 -15   -0.02    1.60
  -4  -3 -10   12.54    2.24
   4   3  10   11.35    2.36
  -4   3 -10   11.60    2.44
  -4  -3 -10   11.08    1.71
  -4   3 -10    9.44    0.86
   4  -3  10   10.75    2.66
  -4  -3 -10   11.78    1.44
   0  -1 -24   75.17    4.43
   0  -1  24   72.38    2.66
   0  -1  24   68.97    3.00
   0   1 -24   74.66    4.60
   0  -1  24   59.48    3.79
   0   1  24   58.01    4.59
   0   1  24   74.44    2.90
   0  -5   9  184.78    5.11
   0   5  -9  194.73    4.68
   0  -5  -9  182.61    4.86
   0   5  -9  166.79    5.32
   0   5   9  178.09    5.68
  -2   2  22  910.82    7.27
   2   2 -22  875.18   13.41
   2  -2 -22  865.61   12.21
  -2  -2  22  897.82   12.41
  -5   0 -11   -0.03    1.16
  -5   0 -11   -0.36    2.35
   5   0  11   -0.17    2.00
  -2  -5  -3   27.27    2.25
   2   5   3   27.54    2.69
   2   5   3   32.86    1.60
  -2  -5  -3   25.72    2.18
  -2   5  -3   26.57    2.79
   2  -5   3   26.47    2.03
  -2   4  15   36.95    2.61
   2  -4 -15   39.91    2.38
   2   4 -15   35.78    2.98
   2   4 -15   35.45    2.40
  -2  -4  15   42.67    2.78
   3   4 -12  208.53    5.20
   3   4 -12  200.21    5.50
  -3   4  12  196.11    5.51
  -3  -4  12  193.49    5.42
  -1   2 -22   61.43    4.29
   1  -2  22   58.97    3.72
   1  -2  22   58.51    3.54
  -1  -2 -22   61.67    4.02
  -1  -2 -22   58.58    3.33
   1   2  22   65.24    3.26
  -4   2 -14   28.53    3.36
  -4   2 -14   24.09    1.69
  -4  -2 -14   26.17    2.34
  -4  -2 -14   29.05    3.03
   4   2  14   23.69    2.98
  -4  -2 -14   28.80    2.42
   4  -2  14   31.76    3.50
   2  -5  -5    3.56    1.20
   2   5  -5    4.04    1.63
  -2   5   5    3.16    1.68
   2   5  -5    2.81    1.36
  -2  -5   5    3.51    1.28
   3  -3  15  368.12    5.94
  -3   3 -15  380.34    8.95
  -3  -3 -15  389.24    8.32
   1  -5   8  821.89   10.34
  -1   5  -8  838.35    9.01
  -1  -5  -8  816.73   10.65
  -3   0 -20   18.58    1.94
  -3   0 -20   22.69    1.68
   3   0  20   20.32    2.68
  -3   0 -20   24.97    3.18
   3   0  20   15.92    2.46
  -2   0  24  652.10   12.86
   2   0 -24  716.61   12.19
  -4  -4   2   91.93    4.07
   4   4  -2   82.00    4.22
   4   4  -2   90.73    3.68
  -4  -4   2   85.01    3.37
   4  -4  -2   85.12    2.95
  -4  -4   1  204.35    5.11
   4  -4  -1  202.54    4.36
   4   4  -1  205.16    5.26
  -4  -4   1  208.83    5.78
   4   4  -1  191.45    6.06
   3   1 -22   44.74    3.51
   3  -1 -22   45.66    3.46
  -3   1  22   33.50    3.76
  -3  -1  22   38.30    3.24
   4   1  16   67.84    4.45
   4  -1  16   75.84    4.68
  -4  -1 -16   63.22    2.59
  -4  -1 -16   66.07    3.29
  -4  -1 -16   73.05    4.55
  -4   1 -16   66.19    2.96
  -3   2 -18  200.78    6.97
  -3   2 -18  190.69    3.92
  -3  -2 -18  210.91    6.58
   3  -2  18  215.94    7.41
  -3  -2 -18  189.21    5.51
   3   2  18  186.24    6.24
   4   4  -3   -0.25    1.47
  -4  -4   3    0.35    0.98
   4   4  -3    0.09    1.61
  -4  -4   3    0.92    1.25
   4  -4  -3    0.69    0.90
  -4   4   3   -0.16    1.61
   1  -5  -9   75.86    3.01
  -1  -5   9   74.21    3.49
   1   5  -9   76.87    3.30
  -1   5   9   76.09    3.87
   1   5  -9   72.75    3.65
  -4  -4   0   26.18    2.34
   4  -4   0   28.99    4.84
  -4  -4   0   24.07    1.97
   4   4   0   19.27    2.47
   2   5   4    6.84    1.22
   2   5   4    5.49    1.96
  -2   5  -4    4.34    1.98
  -2  -5  -4    5.30    1.47
   2  -5   4    5.32    1.33
  -2  -5  -4    5.21    1.39
  -2  -3 -18   43.65    2.89
   2  -3  18   39.50    3.95
  -2  -3 -18   47.43    3.46
  -2   3 -18   45.79    3.83
   2   3  18   40.60    3.12
   2  -3  18   42.65    2.47
  -1  -2  23   39.07    3.05
  -1   2  23   45.92    2.15
  -1  -2  23   35.33    2.39
   1   2 -23   42.51    3.77
   1  -2 -23   45.01    3.48
  -2  -1 -22    3.66    2.31
   2   1  22    1.64    1.64
   2  -1  22    3.93    1.79
   2  -1  22    2.09    1.70
  -2  -1 -22    2.19    1.29
  -5  -2  12  190.58    4.68
   5   2 -12  211.84    6.03
   5  -2 -12  222.96    5.82
  -5  -2  12  183.17    5.14
  -4  -4   4   93.50    3.59
   4   4  -4   93.95    4.28
  -4   4   4   82.59    4.16
   4  -4  -4   84.51    2.99
  -4  -4   4  102.08    4.04
   4   4  -4   98.27    3.86
   4   0 -20   75.99    3.99
  -4   0  20   66.52    4.18
   0  -2 -23  354.38    8.34
   0   2  23  374.66    6.45
   0  -2  23  296.29    6.80
   0  -2 -23  295.04    7.14
   0  -2  23  336.69    5.79
   0   2 -23  350.66    9.03
   0  -2  23  340.32    8.20
   3  -4  10 1111.70   10.56
  -3  -4 -10 1119.77   13.07
   3   4  10 1117.38   12.71
   2  -5  -6  306.83    6.33
  -2  -5   6  312.45    6.47
  -2   5   6  322.73    7.70
  -4  -4  -1   15.24    1.75
  -4  -4  -1   15.68    1.98
   4   4   1   12.85    2.25
   5   2   8    4.18    2.20
  -5  -2  -8    5.55    1.45
  -5   2  -8    6.42    2.44
   5  -2   8    6.26    2.31
  -5  -2  -8    6.78    0.99
  -5   2  -8    4.94    0.78
   1   0  24  391.87    7.43
  -1   0 -24  380.76    9.54
   4   3 -14  380.54    7.81
   4  -3 -14  408.48    7.14
  -4  -3  14  394.36    7.43
   5   3  -2  751.79   11.59
  -5  -3   2  817.03   11.26
   5  -3  -2  766.91   13.53
  -5  -3   2  824.35    8.84
  -5  -3   3  218.05    5.83
  -5  -3   3  224.71    4.73
   5  -3  -1  117.37    5.65
  -5  -3   1  135.67    3.64
  -5  -3   1  132.86    4.61
   5   3  -1  118.58    4.92
  -4  -4   5  220.56    5.45
   4   4  -5  205.58    6.05
  -4   4   5  194.15    6.05
   4   4  -5  211.43    5.33
  -4  -4   5  231.27    6.03
   5  -1 -15   -0.02    1.55
  -5  -1  15   -0.05    1.34
   5   1 -15    1.19    1.65
  -5   1  15   -0.84    1.86
   0   5 -10   29.76    2.63
   0   5  10   37.86    2.93
   0  -5 -10   37.20    2.44
   0  -5  10   35.38    2.50
   0   5 -10   34.49    2.65
   1  -4  16  595.04    8.62
  -1   4 -16  538.69    9.99
   1   4  16  546.36    9.58
   1   4  16  585.12    7.95
  -1   4 -16  499.20    9.20
  -1  -4 -16  551.82    8.98
  -6   0   2  337.56    5.39
   6   0  -2  322.00    8.04
   6   0  -3   -0.78    1.76
  -4  -4  -2  229.31    6.14
  -4  -4  -2  230.12    5.44
   5   3  -4  206.19    5.79
  -5  -3   4  219.39    5.90
   5   3  -4  209.70    6.27
  -5  -3   4  217.17    4.60
   2   4  14   22.68    2.43
   2  -4  14   19.82    1.79
  -2  -4 -14   20.54    2.19
  -2   4 -14   19.53    2.63
  -2   4 -14   19.00    1.50
   2   4  14   19.68    2.48
   5   3   0    2.04    1.82
   5  -3   0    3.06    2.03
  -5  -3   0    4.21    1.09
  -5  -3   0    4.47    1.39
  -2  -5  -5  395.84    7.68
  -2  -5  -5  407.70    7.77
  -2   5  -5  393.26    8.88
   2  -5   5  401.80    7.06
   6   0  -1   -0.73    1.79
  -6   0   1    0.08    0.86
   0  -4 -17    0.09    1.06
   0   4 -17    0.37    1.41
   0   4 -17    0.16    1.98
   0   4  17   -0.35    1.29
   0  -4  17    0.22    1.06
   0   4  17   -0.68    1.32
  -1  -3 -20    0.85    1.26
  -1   3 -20    1.20    2.41
   1   3  20    1.09    1.47
   1  -3  20    0.84    1.08
  -1  -3 -20    0.10    1.98
   1  -3  20    0.35    2.20
   6   0  -4   70.04    3.84
   5   1  11   97.35    5.30
  -5  -1 -11   95.82    3.93
  -5  -1 -11  102.01    5.31
  -5   1 -11   96.31    5.26
  -5  -1 -11   80.70    1.91
   5  -1  11  102.28    5.46
  -5   1 -11   91.11    3.26
   4   3  11    3.79    2.13
  -4  -3 -11    3.86    1.46
  -4  -3 -11    3.90    1.11
  -4   3 -11    4.90    2.26
  -4  -3 -11    4.78    2.11
  -4   3 -11    3.78    0.80
  -3   3  18  369.46    6.33
  -3  -3  18  353.39    7.41
   3   3 -18  346.36    7.87
   1   0 -25   -0.30    2.26
  -1   0  25   -0.87    1.80
   2  -3 -20    0.41    1.10
  -2   3  20    0.55    1.13
   2  -3 -20    0.34    1.87
  -2  -3  20    0.50    1.19
   2   3 -20   -0.41    1.89
  -4   0 -17    0.22    1.09
   4   0  17   -1.21    2.06
  -4   0 -17   -0.06    2.35
  -1  -5  -9   89.63    3.81
  -1   5  -9   90.60    3.46
  -1   5  -9   88.25    3.12
  -1   5  -9   86.13    4.23
   1   5   9   84.89    4.19
   1  -5   9   90.15    3.61
   5   0 -16  276.29    6.96
  -5   0  16  269.64    7.30
   1   4 -17   29.03    2.51
   1  -4 -17   31.76    2.36
  -1   4  17   30.09    2.43
   1   4 -17   31.79    3.27
  -1  -4  17   32.85    2.43
  -3   4  13   82.85    3.72
  -3  -4  13   85.79    3.71
   3   4 -13   84.44    3.91
   3   4 -13   89.80    3.54
  -5  -3   5  103.02    3.35
   5   3  -5   96.07    4.34
   5   3  -5   97.87    4.20
  -5  -3   5  100.18    4.02
   5  -3  -5  100.23    5.19
   6   0   0    0.80    1.69
  -6   0   0    0.42    0.92
   2   5  -7   65.37    3.50
  -2   5   7   63.10    3.70
  -2  -5   7   60.25    2.93
   2   5  -7   68.41    3.02
   6   0  -5   -0.17    1.55
  -6   0   5    0.09    0.95
  -4  -4   6   31.05    2.25
  -4  -4   6   31.64    2.45
  -4   4   6   28.65    2.68
   4   4  -6   30.14    2.70
   4   4  -6   30.78    2.45
  -4  -2  18  104.03    4.23
   4  -2 -18  105.86    4.34
   4   2 -18   98.97    4.46
   5   3   1   12.05    2.39
  -5  -3  -1   11.40    1.33
  -5  -3  -1   13.15    1.88
   0   0 -25    0.48    2.28
   0   0  25   -0.46    1.20
   0   0  25    0.30    1.75
  -3  -1 -20    0.79    2.16
   3   1  20    1.05    1.76
  -3  -1 -20    1.35    1.22
  -3   1 -20    2.05    0.91
   3  -1  20    0.45    1.81
  -3   1 -20    0.95    1.16
   1  -5 -10    0.30    1.00
  -1  -5  10   -0.11    1.11
  -1   5  10   -0.09    1.48
   1   5 -10    0.37    1.38
   1   5 -10    0.58    1.64
  -2  -1  24  252.24    7.49
  -2   1  24  243.69    8.98
   2  -1 -24  270.26    7.54
  -5   0 -12  647.83    8.92
  -5   0 -12  665.74   12.48
   5   0  12  683.87   12.90
   1  -3 -21   81.06    3.74
   1  -3 -21   88.96    4.21
   1   3 -21   85.86    4.87
  -1  -3  21   76.57    2.98
  -1   3  21   90.37    3.35
  -1  -3  21   84.94    3.77
   0   3 -21   49.19    3.86
   0  -3  21   45.47    2.81
   0   3  21   52.43    2.97
   0  -3  21   43.44    2.49
   0  -3 -21   47.08    2.91
   0  -3 -21   49.62    3.46
  -4  -4  -3   12.16    1.59
  -4  -4  -3   11.40    1.89
   4   4   3    9.86    2.30
   3   2 -21  262.35    7.25
   3  -2 -21  270.84    6.96
   2  -2  21    9.98    2.37
   2   2  21   12.72    2.22
   2  -2  21   12.90    2.11
  -2   2 -21   12.63    2.89
  -2  -2 -21   13.71    2.65
   3   0 -23   -1.22    2.30
  -3   0  23   -2.27    2.34
  -2   4  16  147.84    4.68
  -2  -4  16  158.29    4.92
   2  -4 -16  149.20    4.36
   2   4 -16  144.72    5.24
   2   4 -16  135.55    4.27
   6   0   1   -0.50    1.81
  -6   0  -1    0.45    0.92
  -6   0   6   64.33    2.89
   6   0  -6   54.54    3.35
  -5  -3   6    1.56    0.96
   5  -3  -6    1.87    1.41
  -5  -3   6    1.19    1.19
   5   3  -6    1.68    1.65
   5  -3  -6    4.84    2.18
   5   3  -6    1.38    1.70
   5  -2 -13  394.09    7.54
  -5  -2  13  379.01    6.71
   5   2 -13  376.66    8.05
  -5  -3  -2  258.08    6.46
   5   3   2  255.70    7.43
   5  -3   2  238.92    7.69
   4  -1 -20  654.34   10.65
   4   1 -20  653.54   11.08
  -2  -5  -6  466.89    8.28
  -2  -5  -6  479.87    8.55
  -2   5  -6  457.58    9.57
   2  -5   6  463.52    7.59
   1  -1  24    2.25    1.41
   1  -1  24    1.15    1.49
   1   1  24    0.69    2.16
   1  -1  24    1.17    1.56
   1   1  24    1.59    1.47
  -1   1 -24    1.58    2.59
  -1  -1 -24    2.51    2.43
  -4  -4   7   17.64    1.91
  -4  -4   7   19.72    2.09
   4   4  -7   20.06    2.31
   4   4  -7   17.36    2.31
  -4   4   7   14.66    2.23
  -5  -2  -9   13.88    2.58
  -5  -2  -9   14.65    1.90
  -5  -2  -9   15.01    1.28
  -5   2  -9   14.23    2.90
   5   2   9   12.67    2.59
  -5   2  -9   13.82    1.18
   5  -2   9   15.15    2.87
  -4   2 -15  211.43    7.29
  -4  -2 -15  215.31    6.77
   4   2  15  197.33    6.85
  -4   2 -15  183.48    4.26
  -4  -2 -15  195.94    5.68
  -4  -2 -15  178.55    4.79
   4  -2  15  220.18    7.91
  -3   4 -11  193.44    6.19
  -3  -4 -11  185.62    5.62
   3  -4  11  181.94    4.38
  -2   0 -23   -0.18    2.64
   2   0  23   -1.52    2.31
   2   0  23   -0.96    1.85
  -2   5   8   75.56    3.94
   2   5  -8   75.75    3.69
   2   5  -8   83.20    3.40
  -4  -4  -4  154.71    5.25
   4   4   4  154.05    5.91
  -4  -4  -4  157.15    4.53
  -3   3 -16  210.77    4.34
  -3  -3 -16  227.84    6.62
  -3   3 -16  224.76    7.16
  -6   0  -2   28.07    1.86
   6   0   2   24.00    2.92
   0  -5  11  229.25    5.82
   0   5 -11  229.94    5.59
   0   5 -11  221.03    6.22
   0   5  11  237.61    6.58
  -6   0   7   -0.68    1.50
   6   0  -7    0.18    1.48
   6   0  -7    0.26    1.67
  -6  -1   2  468.66    7.44
   6   1  -2  453.37    9.38
  -6  -1   3  158.25    4.34
   6   1  -3  153.51    5.62
   6  -1  -3  150.59    5.74
  -4  -3  15   45.25    2.86
   4  -3 -15   43.61    2.74
   4   3 -15   41.83    3.06
   5  -3  -7   17.58    1.96
   5  -3  -7   10.43    2.14
   5   3  -7   18.55    2.31
   5   3  -7   15.85    2.23
  -5  -3   7   15.95    1.56
  -5  -3   7   16.85    1.90
   6  -1  -1   60.21    3.95
   6   1  -1   63.40    3.98
  -6  -1   1   71.35    3.10
   6  -1  -4  200.37    6.39
  -6  -1   4  214.87    4.20
  -6  -1   4  195.20    4.75
   6   1  -4  194.36    6.16
   5   3   3    8.69    2.34
  -5  -3  -3   10.62    1.79
  -5  -3  -3   11.31    1.35
   5  -3   3   13.98    2.75
  -1  -1  25   83.48    4.64
   1  -1 -25  101.50    5.22
  -1   1  25   79.22    5.56
   1   1 -25  104.68    5.50
   1  -5  10   39.50    2.59
  -1   5 -10   36.16    2.11
  -1  -5 -10   37.87    2.55
  -1   5 -10   37.04    3.16
  -1   5 -10   40.79    2.69
   1   5  10   39.79    3.10
   2  -2 -23   73.06    4.33
   2   2 -23   69.44    4.55
  -2  -2  23   63.98    4.04
   4  -1  17   31.87    3.56
  -4  -1 -17   32.61    3.52
   4   1  17   28.93    3.29
  -4  -1 -17   27.61    2.34
  -4   1 -17   27.22    2.09
   5  -1 -16    1.87    1.63
  -5   1  16    1.41    2.06
   5   1 -16    2.56    1.78
  -5  -1  16    1.70    1.51
   6  -1   0  131.99    5.47
   6   1   0  142.55    5.73
   6   1  -5  295.04    7.31
   6  -1  -5  310.79    7.75
  -6  -1   5  316.67    5.37
   0  -1  25  271.86    7.53
   0  -1 -25  343.47    8.79
   0  -1  25  328.94    6.07
   0   1 -25  332.15    9.00
   0   1  25  345.97    5.88
   0   1  25  254.92    8.66
   4   4  -8 1366.18   13.64
  -4  -4   8 1346.43   13.59
  -1  -5  11    0.14    1.10
  -1   5  11   -0.24    1.52
   1   5 -11    0.02    1.33
   1  -5 -11    0.16    1.10
   1   5 -11    2.24    1.82
  -3  -2 -19   31.47    3.38
  -3   2 -19   28.07    3.45
  -3  -2 -19   27.23    2.48
  -3   2 -19   25.66    1.74
   3   2  19   29.91    3.12
   3  -2  19   27.80    3.44
   2   5   7  438.05    9.24
  -2   5  -7  428.38    9.17
  -2  -5  -7  440.31    8.28
   2  -5   7  445.24    7.56
  -2  -5  -7  433.32    8.14
  -4  -3 -12    7.50    2.36
  -4   3 -12    4.83    0.92
  -4  -3 -12    6.14    1.64
  -4   3 -12    6.92    2.53
  -5   1 -12  234.28    7.73
   5  -1  12  252.59    8.09
  -5  -1 -12  236.21    7.48
   5   1  12  239.42    7.78
  -5  -1 -12  237.13    6.06
  -5   1 -12  253.40    5.42
  -6   0  -3    0.10    1.03
   6   0   3   -0.36    1.93
  -2  -3 -19  468.42    8.73
  -2   3 -19  437.88    9.95
  -2  -3 -19  470.72    9.23
   2   3  19  436.94    8.94
  -1  -2 -23   51.90    3.89
  -1  -2 -23   48.40    3.13
  -1   2 -23   51.88    4.16
   1  -2  23   46.80    3.48
   1   2  23   54.78    3.07
   1  -2  23   53.22    3.55
   3   4 -14  206.99    5.91
  -3  -4  14  217.62    5.91
   3   4 -14  225.68    5.40
  -3   4  14  207.04    5.62
   6   0  -8  102.80    4.17
   6   0  -8  102.05    4.55
  -3  -1  23   48.87    3.63
   3   1 -23   65.21    4.22
   3  -1 -23   61.40    3.88
  -3   1  23   43.23    4.31
   4   0 -21   -0.09    1.79
  -4   0  21   -0.18    1.88
  -3   0 -21   -0.03    2.29
   3   0  21   -0.95    1.84
   3   0  21   -0.87    1.75
  -3   0 -21    1.00    1.14
  -4  -4  -5  219.02    5.41
  -4  -4  -5  217.57    6.25
   4   4   5  204.55    6.80
  -2  -4 -15   27.15    2.43
  -2   4 -15   26.32    1.75
   2  -4  15   21.14    5.65
   2   4  15   26.15    2.63
   2  -4  15   26.62    2.02
   2   4  15   23.88    2.62
  -2   4 -15   26.30    2.95
  -5  -3   8    1.09    0.96
   5  -3  -8    1.96    1.79
   5   3  -8    1.09    1.65
   5  -3  -8    2.10    1.45
   5   3  -8    1.68    1.56
   6   1   1   46.05    3.70
   6  -1   1   41.91    3.50
   6   1  -6   12.43    2.33
   6  -1  -6   15.21    2.48
  -6  -1   6   15.79    1.75
   1   4  17  122.60    4.77
  -1   4 -17  127.05    5.30
  -1  -4 -17  131.67    4.59
   5   3   4   63.89    4.11
  -5  -3  -4   73.61    2.71
   5  -3   4   65.25    4.41
  -5  -3  -4   74.85    3.72
  -5   0  17   -0.71    1.69
   5   0 -17    0.27    1.60
   2   5  -9    2.87    1.62
  -2   5   9    3.18    1.83
   2   5  -9    2.53    1.82
   2   0 -25    1.01    2.41
  -2   0  25   -0.97    2.38
  -5  -2  14  186.74    5.07
   5   2 -14  197.66    6.21
   0  -4 -18   44.45    2.80
   0  -4  18   44.78    2.80
   0   4 -18   36.47    2.76
   0   4 -18   42.52    3.48
   0   4  18   43.59    2.90
  -5   0 -13   -0.12    1.29
  -5   0 -13    1.32    2.49
  -3   3  19   59.56    2.79
  -3  -3  19   50.57    3.13
   3  -3 -19   53.32    3.36
   3   3 -19   51.63    3.66
   1   2 -24  113.43    5.63
  -1  -2  24  117.61    5.22
  -1   2  24  128.14    3.37
   1  -2 -24  123.02    5.28
   2  -1  23   90.48    4.53
  -2  -1 -23   83.95    3.95
   2  -1  23  109.38    4.66
   2   1  23  109.79    4.55
  -2  -1 -23  100.17    5.20
  -5  -2 -10  182.08    6.24
  -5  -2 -10  177.89    5.36
  -5   2 -10  165.34    3.36
   5   2  10  162.47    6.39
  -5  -2 -10  191.44    3.75
   5  -2  10  210.13    7.77
  -5   2 -10  184.77    6.68
  -1  -4  18   21.96    2.19
   1  -4 -18   23.04    2.11
  -1   4  18   22.48    2.16
   1   4 -18   20.77    2.25
   1   4 -18   22.57    3.03
  -4  -2  19   28.30    2.49
   4   2 -19   29.87    2.95
   4  -2 -19   31.08    2.81
  -6  -1  -2  258.18    5.73
   6  -1   2  234.51    7.46
   6   1   2  234.69    7.30
  -6   1  -2  265.20    4.06
   0  -2  24  199.16    5.63
   0  -2 -24  195.12    6.04
   0  -2  24  208.65    6.66
   0   2  24  248.87    5.36
   0  -2 -24  236.14    7.13
   0   2 -24  236.19    7.75
  -6  -1   7  537.94    7.83
   6  -1  -7  524.51    9.46
   6   1  -7  556.74    9.48
   6  -1  -7  565.71    9.89
   6   1  -7  556.67   10.24
   4   4  -9   56.17    3.33
  -4   4   9   47.40    3.26
  -4  -4   9   53.78    2.93
   4   4  -9   56.78    3.34
   6   0   4  438.75   10.04
  -6   0  -4  554.49    7.72
   6   0  -9    0.11    1.83
  -6   0   9   -1.02    1.79
   3  -4  12  289.43   12.02
  -3  -4 -12  273.72    6.89
  -3   4 -12  283.08    7.33
   3  -4  12  266.28    5.16
   4   0  18  180.71    6.76
  -4   0 -18  175.44    6.81
   0   5 -12  429.15    7.80
   0  -5  12  461.01    8.27
   0   5  12  448.71    8.94
   0   5 -12  409.93    8.44
   0  -5 -12  483.32    8.37
  -2  -4  17   76.13    3.64
   2   4 -17   69.15    4.02
  -2   4  17   72.62    3.41
   2  -4 -17   76.75    3.26
   2   3 -21   37.09    3.49
  -2   3  21   41.75    2.33
   2  -3 -21   31.41    2.43
  -2  -3  21   31.97    2.60
   2  -3 -21   36.21    3.23
   1   3  21  105.22    4.18
  -1  -3 -21   78.94    4.18
  -1   3 -21   81.76    4.86
   1  -3  21   55.50    3.90
   1  -3  21   73.65    3.40
  -1  -3 -21   83.54    3.86
   1   0  25   -0.31    1.52
   1   0  25    0.80    2.05
  -1   0 -25   -0.57    2.64
   5   3  -9  105.20    4.30
  -5  -3   9  102.78    3.57
   5   3  -9   98.74    4.01
  -2   5  -8   11.85    2.32
  -2  -5  -8   14.01    1.93
  -2  -5  -8   13.36    1.83
  -2   5  -8   13.07    1.97
   2  -5   8   13.08    1.61
  -4   4  -6  213.34    6.02
   4   4   6  209.47    6.95
  -4  -4  -6  197.28    5.00
  -4  -4  -6  203.50    5.93
  -1  -5 -11   25.36    2.24
   1   5  11   23.89    2.63
  -1   5 -11   21.80    2.56
   1  -5  11   23.64    2.07
  -1   5 -11   24.78    2.49
  -5  -3  -5   20.78    2.39
  -5  -3  -5   21.13    1.73
   5   3   5   17.33    2.77
   4  -3 -16  169.90    5.00
   4   3 -16  160.89    5.43
  -4  -3  16  171.22    5.30
   3  -2 -22  109.74    4.76
  -3  -2  22   94.19    4.47
   3   2 -22  109.85    5.16
   6  -1   3   19.31    2.82
  -6  -1  -3   23.55    2.08
   6   1   3   20.59    2.99
  -6   1  -3   24.33    1.49
   1  -5 -12   67.74    3.12
   1   5 -12   61.51    3.47
   1   5 -12   58.37    3.32
  -1   5  12   62.61    3.60
  -1  -5  12   66.38    3.41
   4  -2  16  536.56   12.10
  -4  -2 -16  525.55    9.22
  -4  -2 -16  566.46   10.93
  -4   2 -16  563.68   11.68
   4   2  16  532.61   11.10
   6   1  -8  178.77    5.64
   6  -1  -8  180.37    5.64
   6   1  -8  176.46    5.97
   6  -1  -8  171.30    5.69
  -6  -1   8  178.66    4.68
   1  -3 -22  902.14   12.29
   1   3 -22  903.37   14.24
  -1   3  22  918.04   10.02
  -1  -3  22  799.88   10.94
   1  -3 -22  817.55   11.51
  -4  -1  21   13.01    2.41
   4   1 -21   16.00    2.58
  -4   1  21   10.52    2.90
   4  -1 -21   15.28    2.40
  -3   1 -21    0.33    1.18
   3   1  21   -0.79    1.84
   3  -1  21    0.11    1.79
  -3  -1 -21   -0.28    2.32
  -3  -1 -21   -0.23    1.19
   2   5 -10  821.22   11.40
   2   5 -10  856.76   10.55
   0  -3  22  196.75    5.57
   0   3 -22  222.12    7.27
   0  -3 -22  215.98    6.02
   0   3  22  243.74    5.89
   0  -3 -22  220.49    6.54
   3   5  -1   36.77    3.18
  -3  -5   1   38.87    2.77
   3   5  -1   42.80    2.43
  -3  -5   1   37.77    2.67
   3  -5  -1   35.30    2.28
  -3   5   1   30.13    3.07
  -1   0  26  381.23    9.87
   1   0 -26  467.35   10.42
   3   5  -2    2.18    1.80
  -3   5   2    1.44    1.88
   3   5  -2    3.21    1.56
   3  -5  -2    3.42    1.25
  -3  -5   2    2.25    1.34
  -3  -5   2    3.44    1.47
   2  -2  22  178.15    5.85
  -2   2 -22  172.98    6.95
  -2  -2 -22  189.39    6.59
  -3   0  24 1415.85   19.06
   3   0 -24 1839.02   19.11
   5   1 -17  196.25    6.22
  -5  -1  17  190.05    6.10
   5  -1 -17  189.42    5.93
  -3  -5   0  380.21    7.68
  -3   5   0  331.18    8.43
   3   5   0  426.87    6.27
   3  -5   0  365.77    6.58
   3   5   0  382.26    8.49
  -3  -5   0  395.24    7.83
  -3   3 -17   92.49    5.11
   3  -3  17   71.84    4.90
  -3  -3 -17   94.54    4.68
   3   3  17   78.06    4.25
   2  -1 -25  240.81    7.38
  -2   1  25  208.32    8.67
   2   1 -25  233.19    7.61
  -2  -1  25  214.88    7.29
  -6   0  -5    0.64    1.15
   6   0   5   -0.03    2.01
   6   0 -10  508.21    9.56
  -6   0  10  551.74    9.36
  -3   5   3  321.24    8.26
   3  -5  -3  343.93    6.61
   3   5  -3  341.94    7.87
  -3  -5   3  345.72    7.26
  -3  -5   3  346.27    7.31
   3   4 -15   40.34    3.07
  -3   4  15   40.32    2.76
  -3  -4  15   41.96    2.81
   4   4 -10   96.73    3.95
  -4  -4  10  102.62    4.05
   4   4 -10   95.06    4.07
  -4  -3 -13  250.40    7.05
  -4   3 -13  243.12    7.46
  -4  -3 -13  241.63    6.70
   0   0 -26   56.55    4.33
   0   0  26   57.86    2.65
   0   0  26   48.18    4.10
  -3  -5  -1    3.37    1.50
   3   5   1    1.88    1.88
  -3  -5  -1    2.20    1.31
   3  -5   1    5.05    1.43
   3   5   1    2.29    1.51
  -5  -1 -13   93.72    3.92
  -5  -1 -13   98.26    5.14
  -5   1 -13   91.70    5.19
  -5   1 -13   94.77    3.35
  -5  -3  10   11.43    1.64
   5  -3 -10   13.70    1.92
   5   3 -10   11.37    2.19
   5  -3 -10    9.28    2.36
   5   3 -10   12.63    2.06
  -5  -2  15   85.38    3.62
   5  -2 -15   98.66    4.28
   5   2 -15   92.67    4.50
  -3  -5   4  191.42    5.54
   3   5  -4  181.09    5.79
  -3  -5   4  187.65    5.52
   3  -5  -4  192.14    5.07
  -3   5   4  172.78    6.19
   3   5  -4  201.29    4.79
   5   3   6  399.17    9.56
  -5  -3  -6  411.15    8.37
   5  -3   6  388.07   10.23
  -4  -4  -7  115.10    3.90
  -4  -4  -7  118.36    4.59
   4   4   7  122.98    5.59
  -4   4  -7  123.72    4.88
  -6  -1  -4    1.47    1.21
   6   1   4    1.01    2.05
   6  -1   4    0.85    1.91
  -6   1  -4    1.52    0.88
  -6  -1   9  180.55    4.93
   6  -1  -9  182.24    5.75
   6   1  -9  178.00    5.92
  -4   1 -18   59.24    2.86
  -4  -1 -18   71.61    4.67
  -4  -1 -18   64.12    3.38
   4   1  18   70.45    4.50
   4  -1  18   70.86    4.82
   3  -5   2  125.79    3.98
   3   5   2  120.99    5.06
  -3  -5  -2  123.87    4.56
  -3  -5  -2  126.51    4.51
   3   5   2  137.56    3.77
  -2  -5  -9   56.80    3.26
  -2  -5  -9   54.14    3.15
  -2   5  -9   49.04    3.52
   2  -5   9   56.45    2.89
  -2   5  -9   59.44    3.12
  -5   2 -11    5.14    2.44
   5  -2  11    3.41    2.40
  -5  -2 -11    3.90    1.42
   5   2  11    4.43    2.38
  -5  -2 -11    5.58    2.39
  -5  -2 -11    4.63    0.99
  -5   2 -11    3.93    1.04
  -2  -4 -16   97.34    4.18
  -2   4 -16   91.47    4.65
   2  -4  16   99.06    3.67
   2  -4  16   80.35    7.94
   2   4  16   83.74    4.27
   5   0 -18   34.59    3.02
  -5   0  18   28.48    2.84
   1   1  25   50.25    3.00
   1  -1  25   51.17    3.20
  -1  -1 -25   49.43    4.09
   1   1  25   33.32    3.87
   1  -1  25   36.97    3.20
  -1   1 -25   55.04    4.53
  -2   0 -24 1367.74   18.17
   2   0  24 1155.30   16.76
  -3  -5   5  318.08    7.12
   3   5  -5  348.42    6.24
  -3   5   5  324.67    8.46
  -3  -5   5  324.88    7.02
   3   5  -5  316.11    7.37
   3  -5  -5  319.13    6.49
   0  -5  13  262.67    6.40
   0   5 -13  245.94    6.26
   0  -5 -13  264.94    6.36
   0   5  13  253.41    6.84
  -5   0 -14   76.34    3.36
  -5   0 -14   83.67    5.05
  -1   4 -18   22.08    3.00
   1   4  18   20.98    2.46
  -1  -4 -18   23.20    2.28
   1  -4  18   25.93    2.23
   3   4  13   68.42    4.26
   3  -4  13   87.08    6.10
  -3   4 -13   78.90    4.36
  -3  -4 -13   83.24    4.13
   3   2  20  247.01    7.28
  -3   2 -20  260.00    8.24
  -3  -2 -20  245.02    6.54
   3  -2  20  244.71    8.03
   2   2 -24  364.35    9.39
  -2  -2  24  370.51    9.18
   2  -2 -24  388.94    9.02
  -1   5 -12   26.97    2.74
  -1  -5 -12   28.01    2.41
  -1   5 -12   21.23    2.62
   1   5  12   26.27    2.74
   1  -5  12   26.83    2.25
   2  -3  20  129.96    4.34
   2   3  20  136.61    5.20
  -2   3 -20  131.24    5.96
  -2  -3 -20  139.08    5.08
   4   0 -22  332.64    8.14
  -4   0  22  270.42    8.29
  -2   5  11   79.45    4.05
   2   5 -11   87.37    4.02
   2   5 -11   85.24    3.87
   3  -5   3   82.64    3.32
  -3  -5  -3   82.35    3.81
  -3  -5  -3   88.12    3.96
   3   5   3   87.12    3.17
   3   5   3   78.19    4.30
  -6   0  -6  452.60    7.11
   6   0   6  403.43    9.90
   6   0 -11    0.55    2.00
  -6   0  11   -0.29    1.79
   0   4 -19   13.35    2.13
   0  -4 -19   17.50    2.07
   0  -4  19   16.73    2.05
   0   4 -19   15.48    2.76
   0   4  19   16.25    2.07
  -1   1  26 1201.02   19.53
   1   1 -26 1597.83   19.32
  -1  -1  26 1337.19   17.39
   1  -1 -26 1604.71   19.00
   3  -3 -20   51.52    3.35
  -3  -3  20   47.77    3.04
  -3   3  20   56.14    2.69
   3   3 -20   55.68    3.84
   1   5 -13   51.36    3.17
   1   5 -13   51.23    3.40
  -1  -5  13   56.95    3.27
   1  -5 -13   60.53    3.08
  -1   5  13   56.96    3.52
   4   4 -11  205.04    5.83
  -4  -4  11  200.19    5.42
   4   4 -11  205.57    5.41
   3  -1 -24   24.80    2.95
   3   1 -24   23.46    3.02
  -3   1  24   15.60    3.20
  -3  -1  24   17.44    2.69
   1  -4 -19   84.00    3.67
  -1  -4  19   85.04    3.91
   1   4 -19   85.93    4.68
  -1   4  19   75.91    3.51
  -4  -2  20    7.70    1.79
   4  -2 -20    8.47    2.07
   4   2 -20    6.63    2.15
  -3  -5   6  268.54    6.33
  -3  -5   6  268.55    6.58
   3   5  -6  278.78    7.14
  -3   5   6  279.40    7.85
   3   5  -6  289.35    5.83
   3  -5  -6  265.74    5.86
  -6  -1  -5  126.75    4.21
  -6   1  -5  123.68    3.12
   6  -1   5  120.02    5.72
   3   0  22    3.67    1.99
  -3   0 -22    3.69    2.47
  -3   0 -22    2.82    1.33
  -2   4  18  136.00    4.52
   2   4 -18  135.95    5.50
   2  -4 -18  145.59    4.52
  -5  -3  11   23.75    2.07
   5  -3 -11   23.07    2.37
   5   3 -11   21.73    2.57
   6  -1 -10   17.28    2.47
  -6  -1  10   17.19    1.96
   6   1 -10   19.14    2.66
  -1   2 -24   76.58    5.06
   1   2  24   81.96    3.70
   1  -2  24   68.98    3.89
  -1  -2 -24   64.87    3.67
  -1  -2 -24   78.61    4.68
   1  -2  24   71.87    4.18
   4   3 -17   57.30    3.61
  -4  -3  17   51.53    3.13
   4  -3 -17   60.98    3.39
   0   1 -26   66.76    4.86
   0   1  26   72.82    3.03
   0   1  26   49.65    4.52
   0  -1  26   63.42    2.92
   0  -1  26   51.01    3.79
   0  -1 -26   68.71    4.61
   5   3   7   31.07    3.47
  -5  -3  -7   30.96    2.65
  -5   3  -7   35.34    3.53
  -5  -3  -7   33.21    2.04
   5  -3   7   34.47    3.90
   4  -4   8    2.91    2.61
  -4   4  -8    2.61    2.06
   4   4   8    3.74    2.14
  -4  -4  -8    3.40    1.21
  -4  -4  -8    2.81    1.57
   3  -5   4  277.97    5.76
  -3  -5  -4  284.98    6.69
   3   5   4  293.81    8.11
  -3  -5  -4  281.57    6.93
   6  -2  -2  202.49    7.01
   6   2  -2  216.98    6.82
  -6  -2   3  117.35    3.09
  -6  -2   3  115.01    4.23
  -4   0 -19    0.37    2.86
   4   0  19   -5.56    2.59
  -4   0 -19   -0.72    1.45
   2   0 -26  267.90    8.01
  -2   0  26  217.78    7.71
  -6  -2   1  287.31    6.61
   6   2  -1  273.57    7.75
  -6  -2   4  340.53    7.00
  -6  -2   4  333.01    5.15
   2  -5  10   80.45    3.38
  -2   5 -10   82.90    3.73
  -2  -5 -10   82.48    3.89
  -2   5 -10   70.47    4.11
  -2  -5 -10   77.35    3.71
   2   3 -22  227.76    7.42
   2  -3 -22  242.55    6.88
  -2   3  22  253.95    5.14
  -2  -3  22  222.92    6.10
  -3   4  16    6.96    1.70
  -3  -4  16    7.62    1.57
   3   4 -16    6.73    2.02
  -5   1  18    0.83    2.29
   5  -1 -18    2.18    1.90
  -5  -1  18    1.05    1.62
   5   1 -18    2.80    2.05
  -1  -2  25   25.03    2.95
   1   2 -25   30.54    3.57
   1  -2 -25   31.31    3.40
   3   5  -7   -0.37    1.64
  -3  -5   7    0.45    1.22
  -3  -5   7    0.12    1.27
  -3   5   7   -0.25    1.91
   3   5  -7   -0.34    1.60
  -4   2 -17    4.05    1.34
   4  -2  17    3.67    2.45
  -4  -2 -17    5.30    1.64
  -4   2 -17    5.13    2.76
   4   2  17    2.43    2.41
  -4  -2 -17    6.14    2.68
   2  -1  24    0.74    1.65
  -2  -1 -24    0.58    1.32
   2   1  24    0.17    1.76
   2  -1  24   -0.18    1.83
  -2  -1 -24    1.06    2.45
  -1  -3 -22    0.55    1.22
   1  -3  22   -0.25    1.31
   1  -3  22   -0.53    1.95
   1   3  22   -0.45    1.52
  -1   3 -22    0.15    2.47
  -1  -3 -22    1.41    2.23
  -4  -3 -14   77.00    3.98
  -4  -3 -14   82.93    4.51
   4   3  14   69.97    4.49
  -4   3 -14   70.18    2.58
   4  -3  14   66.97    4.95
  -4   3 -14   85.13    4.94
   5   2 -16  202.53    6.41
  -5  -2  16  206.35    5.72
   5  -2 -16  221.23    6.22
  -6  -2   0   15.46    2.09
   6  -2   0   14.59    2.92
   6   2   0   12.68    2.84
  -6  -2   5    2.51    1.07
   6  -2  -5    2.85    1.93
   6   2  -5    3.46    2.08
  -6  -2   5    4.32    1.39
   6   0   7   -0.27    2.14
  -6   0  -7   -0.16    1.23
   0  -2 -25   85.35    4.74
   0  -2 -25   69.93    3.90
   0  -2  25   79.99    4.68
   0   2  25   89.67    3.51
   0  -2  25   65.67    3.40
   0   2 -25   78.28    5.05
  -5   1 -14   61.16    4.57
  -5  -1 -14   61.46    3.36
  -5   1 -14   58.56    2.80
  -5  -1 -14   70.90    4.67
  -6   0  12  150.06    5.11
   6   0 -12  155.99    5.56
   4   1 -22    0.36    1.93
   4  -1 -22   -0.20    1.80
  -4  -1  22    0.37    1.60
  -4   1  22    0.70    2.27
   5   2  12  102.02    5.50
  -5  -2 -12  115.01    5.40
  -5   2 -12  115.88    5.69
  -5  -2 -12  103.81    4.28
  -5  -2 -12  114.28    3.14
   5  -2  12  124.01    6.23
   6  -1   6  264.00    8.37
  -6  -1  -6  265.23    6.11
  -6   1  -6  254.86    4.56
  -3  -5  -5   12.04    2.05
   3   5   5    9.79    2.43
  -3  -5  -5   12.26    1.74
  -3   5  -5    9.17    2.31
   3  -5   5   10.37    1.51
  -2  -5  12  374.39    7.96
   2   5 -12  380.94    7.63
   2   5 -12  360.81    7.53
  -2   5  12  362.29    7.93
  -3  -2  23   32.48    3.17
   3   2 -23   35.83    3.49
   3  -2 -23   36.41    3.27
  -3   3 -18  219.50    7.44
   3  -3  18  178.24    6.90
  -3  -3 -18  222.91    6.87
   3   3  18  187.71    6.32
  -6  -1  11    4.67    1.52
   6   1 -11    6.52    2.18
   6  -1 -11    5.89    2.14
  -4  -4  12   14.35    1.89
  -4   4  12   11.77    2.02
   4   4 -12   13.09    2.18
  -6  -2  -1 1052.21   12.49
   6  -2   1 1039.03   15.81
  -6  -2   6  379.00    5.79
   6   2  -6  393.55    8.68
  -6  -2   6  395.95    7.37
   6   2  -6  402.55    8.93
   6  -2  -6  382.10    8.94
   0   5  14    1.20    1.63
   0  -5  14    2.34    1.30
   0   5 -14    0.83    1.99
   0   5 -14    1.12    1.77
   0  -5 -14    1.72    1.38
  -1  -3  23  149.19    5.34
   1  -3 -23  163.09    5.88
  -1   3  23  165.60    4.50
   1   3 -23  163.27    6.71
   5   3 -12  323.38    7.64
  -5  -3  12  341.37    6.92
   5  -3 -12  347.03    7.06
  -1   5 -13  162.99    5.84
  -1   5 -13  179.88    5.42
   1   5  13  167.51    5.87
  -1  -5 -13  190.29    5.74
   1  -5  13  180.74    5.24
   1   0  26    4.66    2.31
  -1   0 -26    3.95    2.67
   1   0  26    3.66    1.62
   0   3  23  434.68    7.60
   0  -3 -23  390.30    8.29
   0   3 -23  418.80   10.17
   0  -3 -23  414.60    8.95
   0  -3  23  372.68    7.94
  -3  -1 -22  127.53    5.91
   3  -1  22  129.06    5.56
   3   1  22  130.39    5.46
   5   0 -19   -0.28    1.76
  -5   0  19   -1.12    1.83
   5  -3   8  248.80    8.42
  -5   3  -8  275.77    7.85
  -5  -3  -8  259.98    6.78
   5   3   8  252.37    8.00
   3   5  -8  188.03    5.06
  -3  -5   8  176.70    5.18
   3   5  -8  183.33    5.65
  -3  -5   8  186.58    5.70
  -3   5   8  178.67    6.06
   2  -4  17  119.36    4.09
  -2  -4 -17  107.34    4.45
  -2   4 -17  110.80    5.10
  -3  -4 -14  170.79    5.65
  -3   4 -14  165.27    6.00
   1   5 -14   97.66    4.24
  -1   5  14  107.13    4.56
   1  -5 -14  110.53    4.08
  -1  -5  14  101.59    4.20
   1   5 -14  100.80    4.54
  -3   0  25   -2.03    2.50
   3   0 -25    4.11    2.67
  -4   4  -9    5.76    2.23
   4  -4   9    4.77    2.77
  -4  -4  -9    6.49    1.72
  -4  -4  -9    6.36    1.33
   4   4   9    6.85    2.35
   2  -2  23  201.32    6.81
  -2   2 -23  209.09    7.76
   2  -2  23  211.73    6.42
  -2  -2 -23  220.02    7.10
  -5   0 -15    0.30    1.18
  -5   0 -15    1.32    2.45
   6  -2   2   12.19    2.94
  -6  -2  -2   15.01    2.07
   6   2   2   10.89    2.85
   6   2  -7  347.97    8.25
  -6  -2   7  328.35    5.45
   6  -2  -7  376.68    8.18
   6   2  -7  367.21    8.10
   6  -2  -7  340.53    8.31
  -4   1 -19   13.51    1.73
   4  -1  19   14.15    2.84
  -4  -1 -19   21.75    3.32
   4   1  19   15.07    2.79
  -4  -1 -19   14.61    1.99
  -2   1  26  205.26    8.69
   2  -1 -26  241.72    7.76
  -2  -1  26  190.51    7.11
   2   1 -26  225.39    7.62
  -1   0  27   -1.25    2.48
   1   0 -27    0.03    2.66
  -3  -5  -6   67.35    3.59
   3   5   6   69.63    4.26
  -3  -5  -6   67.69    3.33
  -3   5  -6   58.92    4.01
   3  -5   6   66.91    3.00
  -1  -4 -19   50.77    3.16
   1  -4  19   53.06    3.01
  -1   4 -19   44.16    3.77
   1   4  19   44.87    3.18
   2  -5  11    9.99    1.57
  -2   5 -11    9.32    2.14
  -2  -5 -11   11.43    1.87
  -2   5 -11   10.84    2.22
   2   5  11   10.94    2.36
   6   0   8   83.51    4.91
  -6   0  -8   92.45    3.44
   4   3 -18  335.76    8.17
  -4  -3  18  325.10    7.31
   4  -3 -18  350.90    7.47
  -6   1  -7   46.27    2.20
  -6  -1  -7   45.30    2.85
   6  -1   7   47.77    4.18
   6   1   7   37.20    3.72
   6   0 -13    0.05    1.88
  -6   0  13    0.21    1.69
   0   0 -27    0.37    2.57
   0   0  27   -0.87    2.11
   6  -1 -12  120.97    4.91
  -6  -1  12  117.78    4.48
   6   1 -12  125.51    5.16
   2   4 -19   78.70    4.59
  -2   4  19   75.48    3.53
   2  -4 -19   82.49    3.56
  -2  -4  19   81.83    3.95
  -4   0  23   -1.39    2.16
   4   0 -23    0.58    1.98
   6  -2   3  390.93    9.94
  -6  -2  -3  389.06    7.78
   6   2   3  367.10    9.43
   0  -4 -20    2.95    1.39
   0  -4  20    2.25    1.40
   0   4 -20    2.94    2.47
   0   4  20    2.44    1.54
   6  -2  -8   48.54    3.40
   6   2  -8   45.01    3.45
   6  -2  -8   43.75    3.45
  -6  -2   8   40.78    2.25
   3   3 -21   46.49    3.84
  -3  -3  21   38.40    2.89
   3  -3 -21   43.99    3.37
  -2   3 -21  200.43    7.32
   2  -3  21  220.23    5.80
   2   3  21  219.40    6.53
  -2  -3 -21  221.13    6.40
  -2  -3 -21  229.77    7.05
  -4  -2  21   50.86    3.56
   4   2 -21   54.07    3.80
   4  -2 -21   55.36    3.59
   3  -2  21  232.53    7.76
  -3   2 -21  241.17    8.17
  -3  -2 -21  216.86    6.21
   3   2  21  238.22    7.19
   1   4 -20  366.30    8.96
  -1   4  20  336.43    6.94
   1  -4 -20  344.84    7.30
  -1  -4  20  350.73    7.73
  -3   5   9  325.56    7.97
   3   5  -9  337.50    6.88
   3   5  -9  328.54    7.33
  -3  -5   9  332.15    7.47
  -3   4  17    5.04    1.59
  -3  -4  17    6.32    1.64
   3   4 -17    6.11    2.09
   2   5 -13   -0.15    2.05
  -2   5  13    2.47    1.71
   2   5 -13    1.03    1.59
  -2  -5  13    1.36    1.46
   4   4 -13   79.52    4.08
  -4  -4  13   75.58    3.59
  -5  -3  13   25.52    2.44
   5   3 -13   26.72    2.99
   5  -3 -13   28.79    2.80
  -5  -2  17    2.20    1.47
   5  -2 -17    2.34    1.88
   5   2 -17    2.49    1.97
   1   1  26   67.37    3.40
  -1   1 -26   70.45    5.07
  -1  -1 -26   69.33    4.76
   1  -1  26   64.09    3.54
   1  -1  26   58.99    4.23
   2   0  25    1.83    3.06
  -2   0 -25    4.81    3.27
  -2   0 -25    4.12    2.01
   2   0  25   -4.60    2.48
   2   2 -25    9.95    2.89
  -2  -2  25    5.94    2.34
   2  -2 -25   12.70    2.91
  -5  -1  19  321.83    8.22
   5   1 -19  336.84    8.18
   5  -1 -19  336.38    7.97
  -5   3  -9  114.56    5.49
   5  -3   9  105.89    6.02
  -5  -3  -9  116.32    3.55
   5   3   9  100.99    5.51
  -5  -3  -9  109.36    4.62
  -4   3 -15  498.87   11.01
  -4  -3 -15  498.64   10.08
   4  -3  15  502.34   12.24
  -4  -3 -15  474.26    9.24
  -5  -2 -13   13.82    2.05
  -5   2 -13   14.07    3.06
  -5  -2 -13   16.76    3.00
   3   5   7   17.72    2.80
  -3   5  -7   13.63    2.53
  -3  -5  -7   15.87    2.11
  -3  -5  -7   17.26    1.98
   3  -5   7   16.83    1.73
  -3  -1  25   22.97    3.00
  -3   1  25   20.21    3.65
   3  -1 -25   27.56    3.21
   3   1 -25   30.29    3.44
  -5  -1 -15  116.85    5.74
  -5  -1 -15  116.55    4.69
  -5   1 -15  103.20    3.63
  -4  -4 -10    8.39    1.56
   4   4  10    7.28    2.42
  -4  -4 -10    7.88    1.86
  -4   4 -10    9.37    2.49
  -3   0 -23   -0.19    2.56
   3   0  23    0.05    1.75
  -3   0 -23    0.64    1.29
   1   5  14   22.21    2.68
   1  -5  14   23.57    2.16
  -1   5 -14   24.11    2.84
  -1   5 -14   20.04    2.57
  -1  -5 -14   24.62    2.44
   0   5  15    1.02    1.58
   0   5 -15   -0.02    1.97
   0   5 -15    0.81    1.60
   0  -5 -15   -0.16    1.33
   0  -5  15    0.43    1.21
   6  -2   4   -0.57    2.28
   6   2   4    0.52    2.43
  -6  -2  -4    0.12    1.32
   6  -2  -9  119.54    4.76
  -6  -2   9  113.85    3.63
   6   2  -9  112.19    4.97
   4   0  20 1214.82   17.02
  -4   0 -20 1236.06   17.62
  -4  -2 -18  153.29    5.23
  -4   2 -18  143.67    4.27
  -4   2 -18  165.44    6.88
   4   2  18  153.56    6.27
   4  -2  18  150.14    6.72
  -4  -2 -18  171.87    6.57
  -1   1  27   46.37    5.07
   1  -1 -27   75.26    4.97
  -1  -1  27   50.44    4.23
   1   1 -27   76.52    5.46
   0   6   0  289.63    7.76
   0  -6   0  286.13    5.79
   1  -2  25    2.19    1.84
  -1  -2 -25    1.97    1.48
   1   2  25    2.64    1.67
   1  -2  25    1.22    1.77
  -1   2 -25    0.87    2.71
  -1  -2 -25    2.06    2.56
   0  -6  -1    4.79    1.63
   0   6  -1    2.80    2.04
   0  -6  -1    4.90    1.59
   0  -6   1    6.75    1.86
   0  -6   1    7.05    1.61
   0   6   1    2.46    2.09
  -2  -3  23  145.86    5.47
   2   3 -23  149.88    6.34
  -1   5  15   65.65    3.64
  -1  -5  15   65.03    3.66
   1   5 -15   57.98    3.40
   1  -5 -15   68.75    3.31
   1   5 -15   69.23    4.04
  -6  -1  -8  120.67    4.28
   6  -1   8  134.62    6.31
   3   5 -10   17.43    2.33
  -3   5  10   19.50    2.68
   3   5 -10   18.74    2.51
  -3  -5  10   19.06    2.30
   0  -6   2  402.54    8.01
   0   6   2  418.31    9.38
   0  -6  -2  383.58    7.92
   0   6  -2  405.49    9.10
   0  -6  -2  393.36    6.93
  -3  -4 -15   46.91    3.26
   3   4  15   41.20    3.66
  -3   4 -15   44.73    3.74
   6   1 -13  101.32    4.73
  -6  -1  13   95.05    4.19
   6  -1 -13  105.71    4.67
  -6   0  -9    0.49    2.92
  -6   0  -9    0.24    1.21
   6   0   9   -0.95    2.40
   0  -1 -27   48.24    4.15
   0   1 -27   49.57    4.49
   0  -1  27   38.54    3.47
  -3   3 -19   32.08    3.70
  -3  -3 -19   35.59    3.47
   3  -3  19   30.96    3.74
   3   3  19   28.70    3.07
   2   5  12    1.97    1.94
   2  -5  12    1.95    1.26
  -2   5 -12    2.38    2.04
  -2  -5 -12    1.27    1.41
  -2   5 -12    1.34    1.88
   6   0 -14  279.99    7.38
  -6   0  14  268.88    7.13
   5   0 -20  207.04    6.59
  -5   0  20  182.57    6.52
   4  -1 -23    0.40    2.04
  -4   1  23   -0.37    2.53
  -4  -1  23    0.74    1.83
   4   1 -23    0.88    2.08
  -1   3 -23    9.24    2.91
   1  -3  23    8.76    1.86
   1  -3  23    5.17    2.17
  -1  -3 -23    9.23    2.63
   1   3  23    9.40    1.90
  -1  -3 -23    9.33    1.82
  -2   0  27   -0.17    2.23
   2   0 -27   -0.30    2.59
   0  -6  -3  351.86    6.66
   0  -6   3  355.30    7.67
   0   6  -3  331.12    8.29
   0  -6  -3  341.05    7.48
  -2   4 -18  120.56    5.56
   2  -4  18  133.93    4.47
  -2  -4 -18  121.43    4.79
  -1  -2  26   22.73    3.13
   1  -2 -26   29.22    3.38
   1   2 -26   31.87    3.72
   3  -2 -24  167.58    6.08
   3   2 -24  157.55    6.28
  -5   0 -16    0.86    1.23
   5   0  16    1.16    2.09
  -5   0 -16    1.44    2.56
  -2  -1 -25   14.32    2.11
   2  -1  25   18.22    2.58
   2  -1  25   14.99    2.49
  -2  -1 -25   18.06    3.27
   2   1  25   19.44    2.59
  -6  -2  -5   89.47    3.92
   6  -2   5   84.44    5.07
   6   2   5   81.55    5.01
  -3  -5  -8  201.07    5.96
  -3   5  -8  222.81    5.88
  -3  -5  -8  196.09    5.52
   3   5   8  214.28    7.22
   3  -5   8  204.21    5.07
  -3   5  -8  192.70    6.81
   6  -2 -10   19.15    2.57
  -6  -2  10   15.37    1.68
   6   2 -10   18.08    2.57
  -5  -3  14  687.53    9.96
   5   3 -14  693.91   11.38
   4   4 -14  382.17    8.20
  -4  -4  14  396.57    8.02
   0   2 -26  225.11    8.02
   0   2  26  240.39    5.52
   0  -2 -26  198.68    6.33
   0  -2  26  194.30    7.05
   0  -2  26  184.86    5.28
   0  -2 -26  227.81    7.39
  -2  -5  14   33.10    2.76
   2   5 -14   31.38    2.63
   2   5 -14   30.90    3.00
  -2   5  14   28.58    2.73
  -1   3  24  403.16    6.79
   1   3 -24  386.67    9.85
   1  -3 -24  384.28    8.78
  -5  -4   2  269.47    6.48
   5   4  -2  263.24    6.73
   0  -6  -4   31.17    2.40
   0  -6  -4   32.56    2.66
   0   6  -4   27.97    3.02
   0  -6   4   32.88    2.78
  -5  -3 -10   13.20    1.54
   5   3  10   12.07    2.97
  -5   3 -10   15.10    3.27
   5  -3  10   12.70    3.28
  -5  -3 -10   11.88    2.03
   5   4  -3   10.50    2.31
  -5  -4   3   11.55    1.61
   5   4  -3   12.75    2.26
   5   4  -1   31.34    3.26
  -5  -4   1   37.00    2.40
   4  -3 -19   -0.05    1.92
   4   3 -19    0.12    2.04
  -4  -3  19   -0.28    1.44
   1  -6   0   -0.66    1.45
  -1  -6   0    0.53    1.40
   1   6   0    0.28    1.84
  -1   6   0   -0.36    1.90
  -1  -6   0    0.62    1.25
   0  -3 -24    7.67    2.84
   0  -3  24    4.65    2.25
   0  -3  24    6.66    2.02
   0  -3 -24    6.02    1.80
   0   3  24    8.16    1.88
   0   3 -24    4.82    2.98
   1  -6  -1   40.82    2.77
  -1  -6   1   43.78    2.64
  -1  -6   1   43.08    2.94
   1   6  -1   42.92    3.43
  -3  -1 -23   19.81    2.26
  -3   1 -23   17.01    2.16
  -3  -1 -23   21.83    3.45
   3   1  23   23.90    3.06
   3  -1  23   21.15    2.94
   5   4  -4    4.43    1.98
   5   4  -4    3.95    1.88
   5  -4  -4    3.08    2.64
  -5  -4   4    3.88    1.27
  -1  -6  -1  210.16    6.29
   1   6   1  194.72    6.40
  -1  -6  -1  182.58    5.09
   1  -6   1  193.86    5.60
  -1   6  -1  175.83    6.31
   4   1  20  146.97    6.26
   4  -1  20  148.61    6.39
  -4  -1 -20  148.90    6.46
  -4   1 -20  144.51    4.59
  -5  -4   0    6.16    1.39
   5   4   0    4.81    2.23
  -1  -6   2   36.81    2.85
   1   6  -2   35.00    3.14
   1  -6  -2   34.61    2.60
  -1  -6   2   34.26    2.42
   1  -4  20    1.06    1.49
  -1   4 -20    0.79    2.35
   1   4  20    0.05    1.61
   1  -4  20   -0.05    3.06
  -1  -4 -20    0.74    1.39
   5   2 -18    6.12    2.14
  -5  -2  18    6.76    1.78
   5  -2 -18    6.57    2.07
  -4  -4 -11   47.81    2.82
   4   4  11   47.13    4.01
  -4   4 -11   53.33    3.93
  -3   4  18   50.49    3.00
  -3  -4  18   50.84    3.32
   3   4 -18   54.79    3.91
  -3  -5  11  573.00    9.92
  -3   5  11  546.76   10.18
   3   5 -11  584.14    9.35
   3   5 -11  560.64    9.40
  -2   4  20  602.38    9.15
   2  -4 -20  613.98    9.39
   2   4 -20  601.71   11.45
  -3   0  26    0.50    2.00
   3   0 -26    1.16    2.30
  -2  -2 -24   46.08    3.99
   2  -2  24   41.47    3.27
   2   2  24   46.43    3.37
  -2   2 -24   45.14    4.44
  -1  -6  -2   65.87    3.64
  -1  -6  -2   61.96    3.26
   1   6   2   61.02    3.93
  -1   6  -2   57.64    3.91
   1  -6   2   60.00    3.31
   1   0  27   -0.45    2.22
   1   0  27    1.33    1.60
  -1   0 -27    0.72    2.72
   1  -6  -3   68.44    3.49
   1   6  -3   66.87    4.04
  -1  -6   3   69.00    3.17
  -1  -6   3   77.59    3.93
   5   4  -5    2.06    2.02
   5   4  -5    4.31    2.12
  -5  -4   5    2.69    1.26
   5  -4  -5    1.93    2.41
  -5  -4  -1  148.38    5.38
   5   4   1  158.67    6.27
  -5  -4  -1  162.14    4.52
   5  -4   1  144.07    5.90
   0  -6  -5  325.49    7.35
   0   6  -5  305.20    7.80
   0  -6   5  317.32    7.16
   0  -6  -5  339.14    6.70
  -5  -2 -14  142.66    6.09
  -5   2 -14  144.73    6.48
  -5  -2 -14  138.89    5.17
   6  -1   9    7.25    2.68
  -6   1  -9   10.45    3.53
  -6  -1  -9    7.38    1.69
   6   1   9    5.25    2.71
   6   1 -14   10.28    2.39
  -6   1  14    9.15    2.50
  -6  -1  14    8.96    1.89
   6  -1 -14    9.70    2.21
   4   2 -22    3.85    2.30
  -4  -2  22    2.91    1.94
   4  -2 -22    4.09    2.16
   5  -1 -20  148.94    5.59
   5   1 -20  152.60    5.89
  -5  -1  20  144.11    5.73
   3  -3 -22    0.95    2.04
   3   3 -22    0.46    2.06
  -1   5 -15    6.66    2.38
   1   5  15    6.67    2.07
  -1   5 -15    4.78    1.97
  -1  -5 -15    8.08    1.86
   1  -5  15    7.67    1.60
   1   4 -21  213.90    7.21
   1  -4 -21  208.13    5.90
  -1   4  21  207.79    5.59
   0  -4 -21  272.69    6.76
   0   4  21  270.75    6.52
   0   4 -21  276.73    8.11
   0  -4  21  292.61    7.10
  -4   3 -16  270.78    8.43
   4  -3  16  219.71    8.52
  -4  -3 -16  272.07    7.81
   4   3  16  233.30    7.67
  -4  -3 -16  261.64    7.22
   6  -2   6  222.61    7.81
  -6  -2  -6  222.33    6.13
   6   2   6  203.85    7.49
  -6  -2  11   23.15    2.07
   6  -2 -11   27.03    2.81
   6   2 -11   24.49    2.93
   0   5 -16   15.97    2.69
   0  -5  16   19.13    2.14
   0   5  16   19.85    2.44
   0  -5 -16   18.43    2.17
   0   5 -16   17.05    2.41
  -6   0 -10  641.43   12.63
   6   0  10  651.03   13.17
   1  -6   3  353.35    7.59
  -1  -6  -3  336.99    7.62
  -1  -6  -3  359.55    7.24
   1   6   3  353.73    8.59
  -4   0  24    4.30    2.09
   4   0 -24    4.48    2.22
   2  -1 -27  129.83    6.11
   2   1 -27  130.80    6.34
  -2   1  27  102.79    6.64
  -2  -1  27   96.52    5.29
  -6   0  15   -1.49    2.16
   6   0 -15    1.10    2.43
  -1  -6   4    1.47    1.32
   1   6  -4    0.89    2.00
  -1  -6   4    1.33    1.47
   1  -6  -4    1.30    1.38
  -1   6   4    1.05    2.04
  -5  -4   6  248.99    5.72
   5   4  -6  258.66    6.65
   5   4  -6  251.78    7.13
   2   3  22  470.17    9.45
  -2  -3 -22  479.96   10.08
   2  -3  22  395.49   10.25
  -2   3 -22  414.39   10.45
   2  -3  22  437.39    8.34
  -2  -3 -22  461.09    9.09
   5   1  16   64.04    4.76
  -5   1 -16   56.22    2.85
   5  -1  16   64.19    4.80
  -5  -1 -16   72.38    4.84
  -5  -1 -16   62.76    3.55
   3   5   9    4.17    2.33
  -3  -5  -9    4.81    1.56
  -3   5  -9    3.02    2.12
  -3  -5  -9    4.46    1.70
  -3   5  -9    4.49    2.11
  -5  -4  -2  265.80    5.73
   5   4   2  263.11    8.00
   2   5  13  178.15    6.36
  -2   5 -13  195.46    5.96
  -2  -5 -13  189.33    5.84
   2  -5  13  178.11    5.04
   3   2  22   48.00    3.84
   3  -2  22   41.12    3.91
  -3   2 -22   51.12    4.59
  -3  -2 -22   48.01    3.31
   1  -5 -16   37.55    2.62
  -1   5  16   36.17    2.88
   1   5 -16   36.19    3.44
  -1  -5  16   34.70    2.74
   1   5 -16   29.92    2.78
   1   0 -28  267.30    8.59
  -1   0  28  194.63    7.92
   0  -6  -6   95.46    3.79
   0  -6  -6   96.27    4.31
   0   6  -6   87.58    4.55
   0   6   6   87.63    4.63
   0  -6   6   93.97    4.08
   1  -6   4  221.02    6.06
  -1   6  -4  198.80    6.71
  -1  -6  -4  215.70    5.71
  -1  -6  -4  213.35    6.14
   1   6   4  214.40    6.94
   5   3 -15   16.54    2.64
  -5  -3  15   16.56    2.04
   5  -3 -15   16.96    2.43
  -3   4 -16    9.33    2.76
   3  -4  16    6.01    2.78
  -3  -4 -16    9.94    2.00
   3   4  16    8.60    2.41
   1  -6  -5  738.76   11.06
   1   6  -5  712.90   11.81
  -1  -6   5  754.92   11.34
  -1  -6   5  696.84    9.36
  -1   6   5  702.78   12.19
   4   4 -15   58.80    3.80
  -4   4  15   47.67    3.09
  -4  -4  15   58.83    3.44
  -4   2 -19   12.22    3.21
  -4   2 -19   10.44    1.69
   4  -2  19   10.87    2.77
  -4  -2 -19   15.53    3.15
  -4  -2 -19   10.62    1.97
   4   2  19    8.91    2.66
   0   0 -28  114.81    5.97
   0   0  28   75.59    5.00
   5   4  -7    7.89    2.16
  -5  -4   7    8.74    1.62
   5   4  -7    7.78    2.11
   2  -2 -26  101.03    5.29
  -2  -2  26   88.50    5.27
   2   2 -26   93.19    5.38
  -5  -4  -3   42.67    3.21
  -5  -4  -3   44.52    2.59
   5   4   3   39.55    3.84
  -5  -3 -11  199.59    4.57
   5   3  11  179.24    7.19
  -5   3 -11  202.67    7.19
  -5  -3 -11  192.08    6.13
   5  -3  11  200.95    8.17
  -2  -5  15  194.84    5.88
   2   5 -15  179.47    6.06
  -2   5  15  182.86    5.77
  -3  -5  12  153.85    5.24
   3   5 -12  160.38    5.27
   3   5 -12  161.08    5.16
  -3   5  12  149.04    5.54
   5   0 -21   -0.43    1.93
  -5   0  21   -0.72    1.96
   4   0  21   -3.01    2.69
  -4   0 -21    0.42    3.03
  -4   0 -21   -0.96    1.56
   3   1 -26  251.95    7.99
   3  -1 -26  249.58    7.79
   2   0  26 1373.02   19.13
   2   0  26 1843.97   18.15
  -2   0 -26 1715.46   21.27
  -2   0 -26 1435.19   16.76
  -1   1 -27    0.58    2.86
   1  -1  27    1.47    1.57
   1   1  27    1.11    2.27
   1   1  27    1.75    1.65
  -1  -1 -27    0.34    2.65
   1  -1  27    1.63    2.20
  -6  -2  -7    6.71    1.86
   6  -2   7    4.99    2.49
   6   2   7    5.90    2.69
   6  -2 -12  146.37    5.22
   6   2 -12  146.03    5.65
  -6  -2  12  129.56    4.32
  -1   6  -5   30.30    3.22
   1   6   5   36.65    3.33
  -1  -6  -5   36.26    2.67
   1  -6   5   33.98    2.59
   3   0  24   84.89    4.65
  -3   0 -24   80.83    5.27
  -3  -3 -20    4.86    2.48
   3   3  20    3.65    1.99
  -3   3 -20    3.87    2.63
   3  -3  20    2.80    2.51
  -2  -3  24    1.87    1.67
   2  -3 -24    2.55    1.49
   2   3 -24    3.57    2.59
   2  -3 -24    2.02    2.45
   4   5  -2    3.34    1.71
  -4   5   2    1.82    1.89
   4   5  -2    2.29    1.94
  -4  -5   2    2.62    1.37
  -4  -5   2    2.34    1.47
  -4  -4 -12  385.54    7.49
  -4   4 -12  407.65    9.18
  -4  -5   1   94.06    3.96
  -4  -5   1  100.99    4.53
   4   5  -1   97.38    5.02
   4   5  -1  108.29    4.00
   5   0  17   -0.27    2.16
  -5   0 -17    1.00    2.67
  -2   4 -19    0.28    2.56
   2  -4  19    0.36    1.93
  -2  -4 -19    0.22    1.41
   2  -4  19    1.76    1.37
   2   4  19    1.39    1.81
  -1   6   6   24.59    3.09
   1  -6  -6   28.29    2.57
   1   6  -6   26.21    2.96
  -1  -6   6   29.44    2.78
   4   5  -3   17.54    2.14
  -4  -5   3   16.36    2.11
  -4  -5   3   15.72    1.95
  -4   5   3   11.71    2.42
   4   5  -3   15.66    2.48
   0   6   7   34.68    3.23
   0  -6  -7   35.24    2.81
   0  -6   7   36.04    2.80
   0   6  -7   33.00    3.12
   0  -6  -7   41.17    2.79
  -6   1 -10  371.40    9.90
   6  -1  10  391.60   10.43
   6   1  10  332.66    9.56
  -6  -1 -10  347.75    7.52
   4   5   0  301.82    8.18
  -4  -5   0  289.30    6.70
  -4  -5   0  309.06    7.45
   4  -1 -24  452.58    9.71
   4   1 -24  445.63    9.92
   5   4  -8   94.06    4.22
   5   4  -8   88.47    4.30
  -5  -4   8   94.07    3.72
  -6   1  15    0.18    2.31
  -6  -1  15    0.42    1.47
   6   1 -15    0.12    1.95
   6  -1 -15    0.71    1.87
  -5  -4  -4  461.47    7.44
   5   4   4  450.33   10.39
  -5  -4  -4  450.53    9.20
   4   5  -4   21.13    2.18
  -4  -5   4   20.40    2.28
   4   5  -4   18.95    2.55
  -4  -5   4   20.91    2.18
  -4   5   4   15.52    2.62
  -4  -3  20  421.07    8.42
   4   3 -20  491.73   10.17
  -1  -2 -26  105.78    4.77
   1  -2  26  106.54    4.76
  -1  -2 -26  134.15    6.23
  -1   2 -26  132.66    6.71
   1   2  26  138.30    4.78
   1  -2  26  109.39    5.19
  -3   5 -10    2.34    2.08
  -3  -5 -10    2.34    1.54
  -3  -5 -10    2.72    1.38
   5   2 -19  104.35    5.01
   5  -2 -19  107.36    4.74
  -5  -2  19   97.07    4.94
  -4  -5  -1  199.98    6.11
   4   5   1  205.83    5.31
  -4  -5  -1  189.73    5.52
   4   5   1  191.11    6.65
  -1   1  28  465.71   12.91
   1   1 -28  677.90   13.81
  -1  -1  28  483.28   10.92
   1  -1 -28  646.38   12.59
   1  -3  24  131.39    5.10
  -1   3 -24  139.87    6.59
  -1  -3 -24  129.79    5.01
  -1  -3 -24  125.12    5.58
   1   3  24  139.55    4.86
  -6   0 -11    0.87    2.92
  -6   0 -11    0.24    1.36
   6   0  11   -2.33    2.67
   6   0 -16  952.94   13.74
  -6   0  16  805.52   12.90
   3   4 -19  173.55    6.52
  -3   4  19  166.06    4.99
  -3  -4  19  160.40    5.67
   3  -2 -25  168.43    6.37
   3   2 -25  154.44    6.42
  -4  -5   5    0.71    1.32
   4   5  -5    0.11    1.61
  -4   5   5    0.66    1.85
  -4  -5   5    0.66    1.33
   4   5  -5    0.33    1.80
  -5   2 -15   -0.29    2.73
  -5  -2 -15    1.05    2.52
  -5  -2 -15    0.23    1.50
  -1  -6  -6  136.26    4.76
  -1   6  -6  121.94    5.33
   1  -6   6  131.59    4.68
  -1  -5 -16  119.81    4.84
  -1   5 -16  111.08    4.91
   1  -5  16  109.09    4.22
   1   5  16  108.86    4.90
  -6  -3   2   89.20    4.07
  -6  -3   2   87.73    2.92
   6  -3  -2   74.57    4.78
   6   3  -2   78.91    4.51
   6   3  -3  104.39    5.02
  -6  -3   3  116.43    4.61
  -6  -3   3  113.64    3.36
   0   1  28   12.17    3.34
   0  -1 -28   22.86    3.55
   0   1 -28   18.26    3.57
   0  -1  28   14.01    2.96
   4   5   2  192.04    5.33
  -4  -5  -2  184.03    5.92
  -4  -5  -2  180.12    5.51
   4   5   2  172.15    6.50
   1  -6  -7  279.57    7.04
  -1   6   7  277.58    7.91
   1   6  -7  270.53    7.46
  -2   5 -14   25.37    3.07
   2  -5  14   23.72    2.28
   2   5  14   23.18    3.15
  -2  -5 -14   27.51    2.71
  -2   5 -14   18.89    2.88
  -6  -3   1   11.05    1.93
  -6  -3   1   10.43    1.33
   6   3  -1    8.51    2.42
   6  -3  -1    8.32    2.53
   0   5 -17   75.79    4.25
   0   5  17   81.29    4.11
   0  -5 -17   87.50    4.01
   0   5 -17   68.45    3.99
   0  -5  17   89.80    4.03
  -6  -3   4    1.57    1.50
   6   3  -4    1.70    2.16
   6  -3  -4    1.84    2.26
  -6  -3   4    2.11    1.13
   6   3  -4    3.31    2.34
   2   4 -21  178.42    6.73
  -2   4  21  187.03    5.24
   2  -4 -21  177.91    5.26
   1   4  21    3.57    1.76
  -1   4 -21    5.28    2.61
   1  -4  21    4.99    1.58
  -1  -4 -21    5.52    1.68
   1  -4  21    1.25    2.46
   1   2 -27   15.85    3.39
  -1  -2  27   13.44    2.61
   1  -2 -27   16.73    3.09
  -2   0  28  213.57    8.46
   2   0 -28  318.93    9.40
   1  -3 -25   16.53    2.26
   1   3 -25   25.88    3.82
  -1  -3  25   17.40    2.48
   1  -3 -25   24.73    3.37
   5   4  -9   26.35    2.67
  -5  -4   9   25.44    2.15
   5   4  -9   26.46    2.78
   5   1 -21  192.75    6.60
   5  -1 -21  189.22    6.27
   4   1  21   16.36    2.99
   4  -1  21   19.14    2.99
  -4  -1 -21   20.80    3.45
  -4   1 -21   15.76    1.93
  -4  -1 -21   16.43    2.16
   4  -3  17  356.48   10.73
  -4  -3 -17  365.97    8.73
  -4   3 -17  367.34    9.82
  -4  -3 -17  364.11    9.01
   0   6  -8    0.69    1.86
   0   6   8   -0.39    2.03
   0  -6  -8    0.80    1.67
   0  -6   8    0.91    1.38
  -2  -1 -26  161.41    6.93
   2  -1  26  135.34    5.82
   2   1  26  176.63    5.79
  -2  -1 -26  132.35    5.24
  -5  -3  16    0.40    1.26
   5   3 -16    0.35    1.90
   1  -5 -17    0.30    1.34
   1   5 -17    0.15    1.67
   1   5 -17    0.25    2.25
  -1   5  17    0.26    1.53
  -1  -5  17    0.70    1.35
  -3   5  13   84.12    4.29
   3   5 -13   87.59    4.03
  -3  -5  13   88.86    4.21
   3   5 -13   91.38    4.23
   5   4   5  143.82    6.28
  -5  -4  -5  143.19    5.40
   6  -3   0    5.73    2.55
   6   3   0    5.61    2.43
  -6  -3   0    6.00    1.68
  -6  -3   5  243.08    6.39
  -6  -3   5  240.13    5.01
   6   3  -5  219.00    6.88
   6   3  -5  227.49    6.86
   6  -2   8   55.15    4.37
  -6  -2  -8   56.38    3.34
   6   2   8   50.75    4.32
  -4  -5   6   51.58    3.16
   4   5  -6   53.90    3.13
  -4  -5   6   51.28    3.16
   4   5  -6   51.79    3.54
   0  -3 -25  530.01   10.71
   0   3  25  537.91    8.47
   0   3 -25  542.18   12.08
   6   2 -13  104.26    4.88
  -6  -2  13   96.76    4.01
   6  -2 -13  111.36    4.71
  -4  -4  16    3.52    1.55
   4   4 -16    4.03    2.10
  -4   4  16    2.48    1.66
   0  -2  27   27.40    3.31
   0  -2 -27   34.82    3.84
   0   2 -27   27.55    3.91
   0  -2 -27   25.98    2.70
  -3  -1 -24  184.30    5.75
   3   1  24  222.64    7.02
   3  -1  24  218.81    7.38
  -3  -1 -24  222.15    7.92
  -3   1 -24  165.23    5.42
   4  -2 -23  481.93    9.93
   4   2 -23  456.40   10.02
  -4  -2  23  448.74   10.45
  -5  -3 -12  156.13    6.15
  -5   3 -12  157.72    6.53
   5   3  12  136.59    6.52
   5  -3  12  138.44    7.11
  -5  -3 -12  150.25    4.07
  -5  -3 -12  149.19    5.56
  -5  -1 -17   10.94    1.96
  -5   1 -17   11.01    1.64
  -5  -1 -17   14.46    3.14
   5   1  17   11.94    2.94
   5  -1  17   12.91    2.83
  -4  -5  -3  360.66    7.53
   4   5   3  368.96    9.29
   2  -6  -1  139.40    4.71
  -2  -6   1  135.19    5.08
  -2  -6   1  145.17    4.84
   2   6  -1  133.27    5.46
  -2  -6   0    0.20    1.36
   2  -6   0    0.43    1.38
   2   6   0    0.26    1.90
  -2  -6   0    0.28    1.36
   3   3 -23   86.98    5.04
   1  -4 -22  486.27    9.07
   1   4 -22  516.96   11.26
  -1   4  22  484.00    8.34
  -1  -4  22  490.25    9.39
  -2  -6   2  207.56    5.69
   2   6  -2  200.90    6.51
   2  -6  -2  206.94    5.74
   0  -4 -22   21.70    2.42
   0  -4  22   23.54    2.49
   0   4  22   22.95    2.40
   0   4 -22   20.59    3.43
  -2   5  16   67.68    3.79
   2   5 -16   62.01    4.14
  -6  -3  -1   25.51    2.49
   6  -3   1   24.57    3.51
   6   3   1   21.79    3.12
   6   3  -6   89.44    4.70
  -6  -3   6   93.60    4.12
   6   3  -6   92.89    4.67
   6  -3  -6  102.72    4.58
  -6  -3   6  101.95    3.60
   2  -6   1   47.82    2.94
   2   6   1   45.08    3.52
  -2  -6  -1   46.53    3.17
  -2  -6  -1   46.29    2.98
   1  -6   7   16.49    2.10
  -1   6  -7   13.88    2.60
  -1  -6  -7   16.76    2.28
  -3   0  27    1.26    2.16
   3   0 -27   -1.07    2.45
   3   4  17    2.03    2.04
   3  -4  17    0.92    2.88
  -3  -4 -17    2.19    1.69
  -3   4 -17    1.83    2.59
   2  -6  -3  147.65    4.90
  -2   6   3  139.11    5.90
   2   6  -3  149.92    5.67
  -2  -6   3  152.75    5.00
   2   2  25   40.60    3.25
   2  -2  25   35.52    3.26
  -2   2 -25   42.37    4.46
  -2  -2 -25   40.86    4.02
   2  -2  25   37.71    3.57
   1  -6  -8  179.95    5.76
  -1  -6   8  184.99    5.75
   1   6  -8  178.04    6.15
  -1   6   8  183.38    6.47
  -4   0  25   -0.69    2.14
   4   0 -25   -0.32    2.21
  -6   1 -11   93.83    5.80
  -6  -1 -11   96.95    5.51
  -6  -1 -11   77.66    4.00
  -4   4 -13   33.56    3.57
  -4  -4 -13   31.63    2.45
   4  -4  13   29.68    4.29
  -4  -5   7   54.67    3.23
   4  -5  -7   50.71    2.80
  -4  -5   7   54.67    3.28
   4   5  -7   51.88    3.46
  -4   5   7   44.96    3.61
   4   5  -7   57.81    3.24
   6   1 -16   38.40    3.47
   6  -1 -16   38.59    3.41
   2   6   2   21.74    2.84
  -2  -6  -2   21.54    2.33
   2  -6   2   23.44    2.23
  -2   6  -2   18.65    2.86
  -2  -6  -2   22.94    2.30
  -3  -5 -11    8.19    2.09
  -3   5 -11    6.48    2.50
  -3  -5 -11    8.39    1.83
  -2   3 -23   29.87    3.96
  -2  -3 -23   31.85    2.87
   2   3  23   34.07    3.22
  -2  -3 -23   34.04    3.74
   2  -3  23   33.53    3.00
   2  -3  23   29.38    3.69
   5   4 -10  158.56    5.48
  -5  -4  10  159.82    4.91
  -2  -6   4   46.95    2.93
  -2   6   4   40.86    3.53
   2   6  -4   46.57    3.49
   2  -6  -4   45.91    2.96
   4   5   4   17.26    3.01
  -4  -5  -4   20.27    2.18
  -6  -3  -2   98.05    4.33
   6   3   2   95.96    5.26
   6  -3   2   94.07    5.52
   6   3  -7  433.65    9.25
   6  -3  -7  452.08    8.63
   6   3  -7  426.80    9.13
  -6  -3   7  429.10    6.91
  -6  -3   7  435.23    8.41
  -1   0 -28   58.78    4.84
   1   0  28   59.71    3.25
  -3  -2 -23  568.04   12.15
   3   2  23  539.26   10.84
  -3   2 -23  509.87   12.05
   3  -2  23  450.36   10.77
  -3  -2 -23  483.59    9.57
   5   4   6  366.89    9.61
  -5  -4  -6  380.17    8.64
  -5  -4  -6  386.34    6.91
   0  -6   9  404.22    8.29
   0  -6  -9  409.97    7.68
   0  -6  -9  421.90    8.79
   0   6   9  399.60    9.28
  -4   2 -20   91.88    3.68
  -4   2 -20  124.56    6.30
  -4  -2 -20  105.16    4.55
   4  -2  20  110.72    5.95
  -4  -2 -20  127.10    6.09
   4   2  20  120.53    5.80
  -5   0  22   24.36    3.12
   5   0 -22   24.93    3.03
   6   0  12   43.28    4.12
  -6   0 -12   37.56    2.68
  -6   0 -12   43.72    4.35
   2   1 -28   84.06    5.52
  -2  -1  28   66.70    4.73
  -2   1  28   74.07    5.86
   2  -1 -28   87.58    5.40
  -2  -6  -3    0.55    1.44
  -2   6  -3   -0.20    2.15
  -2  -6  -3    0.50    1.38
   2  -6   3    0.28    1.28
   6   0 -17    2.22    2.43
  -6   0  17   -0.51    2.15
  -2  -6   5   14.52    1.85
   2   6  -5   14.42    2.43
   2  -6  -5   16.30    2.06
  -2   6   5   12.46    2.46
   5   0  18   66.45    4.85
  -5   0 -18   72.48    5.12
  -5   0 -18   61.75    3.26
   4   5  -8    0.35    1.74
  -4  -5   8    0.16    1.26
  -4   5   8   -0.42    1.87
  -4  -5   8    0.56    1.33
   4   5  -8    1.12    1.72
  -6  -2  -9    7.85    1.82
  -6   2  -9    7.48    3.41
   6  -2   9    4.37    2.51
   6   2   9    3.26    2.60
  -1  -6  -8  211.59    5.96
   1   6   8  192.54    6.72
   1  -6   8  205.09    5.80
   6  -2 -14    1.93    1.97
   6   2 -14    2.09    2.07
  -2  -4 -20   33.40    2.82
  -2   4 -20   35.69    3.78
   2   4  20   32.48    3.03
   2  -4  20   34.68    2.56
   5  -2 -20  121.31    5.09
  -5  -2  20  104.74    5.13
   5   2 -20  114.30    5.28
   4   0  22  299.27    8.71
  -4   0 -22  253.09    6.54
  -6  -3  -3    1.31    1.47
   6   3   3    1.32    2.33
   6  -3   3    1.78    2.50
  -1   0  29   -0.56    2.40
   1   0 -29    2.39    2.89
   3   5 -14   40.95    3.32
  -3   5  14   35.76    3.05
  -3  -5  14   37.98    2.91
  -6  -3   8  174.85    4.62
   6  -3  -8  186.44    5.74
   6   3  -8  184.17    6.46
  -4  -3  21   15.73    2.38
   4   3 -21   16.07    2.99
  -3  -3 -21   13.64    2.99
  -3   3 -21   12.63    3.10
   3  -3  21    9.49    2.90
   3   3  21   10.75    2.38
  -1  -6   9   13.65    2.08
   1  -6  -9   11.71    1.95
   1   6  -9   12.38    2.31
  -1   6   9   13.49    2.51
   4   5   5   55.58    4.25
  -4  -5  -5   57.95    3.27
   2   5  15  351.30    9.11
   2  -5  15  356.52    7.15
  -2   5 -15  371.91    8.36
   2   2 -27   51.86    4.55
  -2  -2  27   48.75    4.20
   2  -2 -27   56.62    4.41
   2   6   4   93.62    5.00
  -2  -6  -4   89.61    4.16
  -2   6  -4   89.81    5.16
   2  -6   4   92.99    3.93
  -2  -6  -4   91.80    4.23
  -3   4  20  381.63    7.32
   3   4 -20  375.62    9.20
  -1   5 -17   80.81    4.55
   1  -5  17   87.06    3.97
   1   5  17   77.66    4.43
  -5  -2 -16  175.03    6.93
  -5   2 -16  168.81    7.22
   5   2  16  157.09    6.98
  -5  -2 -16  164.47    5.70
   5  -2  16  177.38    7.49
  -5  -3  17   78.10    3.81
   5   3 -17   88.66    4.68
   3   1 -27    3.54    2.64
  -3   1  27    0.14    2.70
   3  -1 -27    1.96    2.50
  -2  -3  25  127.48    5.43
   2  -3 -25  116.08    4.78
  -5  -4  11  116.86    4.34
   5   4 -11  130.90    5.27
  -2  -6   6   18.60    2.00
   2  -6  -6   18.10    2.14
  -2   6   6   17.04    2.63
   2   6  -6   16.39    2.50
   4   1 -25   54.50    4.23
   4  -1 -25   55.58    4.17
  -4   1  25   33.15    4.30
  -4  -1  25   34.66    3.61
   7   0  -3   -1.89    2.29
   0   0  29   -1.27    2.63
   0   0 -29    0.10    2.94
  -4  -4  17    6.48    1.78
  -4   4  17    6.34    1.84
   4   4 -17    7.69    2.41
   0   5 -18   21.70    2.77
   0   5 -18   25.86    3.20
   0   5  18   26.60    2.75
   0  -5 -18   31.64    2.75
   0  -5  18   27.15    2.57
   7   0  -2  102.01    5.05
   7   0  -4  368.89    8.80
  -5  -3 -13   80.14    4.14
  -5  -3 -13   86.01    4.87
  -5   3 -13   89.95    5.32
  -5  -4  -7  123.62    5.17
   5   4   7  115.45    5.82
   5  -4   7  116.64    6.82
  -5  -4  -7  126.05    4.10
  -2   0 -27    8.80    3.83
   2   0  27   -1.06    2.30
  -2   0 -27    4.20    2.18
   2   0  27    5.17    3.53
  -3   0 -25   -0.52    1.50
   3   0  25    0.92    2.11
  -3   0 -25    0.04    2.82
  -1   5  18   40.49    3.05
  -1  -5  18   42.32    2.97
   1  -5 -18   43.08    2.90
   1   5 -18   42.68    3.72
   7   0  -1   -1.65    2.53
   0  -6 -10  108.71    4.73
   0   6 -10  100.36    5.00
   0  -6 -10  116.79    4.50
   0   6  10  103.25    5.07
   0  -6  10  112.63    4.71
  -1   1 -28   20.76    3.77
  -1  -1 -28   21.17    3.54
   1  -1  28   15.15    2.90
   1   1  28   19.11    2.29
   1   1  28   10.10    2.93
   7   0  -5   -0.76    2.16
  -4   5   9    3.23    2.05
  -4  -5   9    5.10    1.60
   4   5  -9    4.35    1.86
   4   5  -9    4.42    1.88
  -6  -3  -4   11.85    2.00
   6   3   4    9.59    2.75
   6  -3   4   11.95    3.05
  -6  -3   9  262.46    6.13
   6  -3  -9  257.53    6.80
  -3  -5 -12  579.63    9.91
  -3   5 -12  605.75   10.22
   3   5  12  553.81   11.50
  -3  -5 -12  623.59   10.92
  -4  -3 -18    1.39    1.70
  -4  -3 -18    3.53    2.64
  -4   3 -18    2.24    2.80
   4  -3  18    0.44    2.61
   4   3  18    2.19    2.36
  -5   1  22    1.79    2.61
   5  -1 -22    3.65    2.26
  -5  -1  22    1.58    1.95
   5   1 -22    3.79    2.33
   2  -6   5  219.77    5.81
  -2  -6  -5  220.69    6.36
  -2   6  -5  207.18    7.21
  -2  -6  -5  223.29    6.24
   2   6   5  228.18    7.35
  -2   5  17  200.34    6.06
   2   5 -17  196.26    6.56
   2   4 -22   17.95    3.19
  -2  -4  22   17.85    2.47
   2  -4 -22   18.21    2.19
  -2   4  22   20.86    2.21
  -6  -1 -12  201.19    7.44
   6  -1  12  201.12    7.76
   6   1  12  194.85    7.69
  -6   1 -12  212.41    8.04
   1   3  25   52.18    3.29
  -1   3 -25   53.26    4.72
  -1  -3 -25   49.13    4.12
   1  -3  25   46.67    3.57
  -1  -3 -25   47.88    3.31
   1  -3  25   39.22    3.66
   7   0   0 1008.77   15.46
  -6  -1  17   64.81    3.86
   6  -1 -17   74.68    4.34
   6   1 -17   75.96    4.53
   3   2 -26   45.90    4.25
   3  -2 -26   49.53    4.17
   4   5   6  175.73    6.90
  -4  -5  -6  178.87    6.01
  -4  -5  -6  181.02    5.54
   1  -4  22    5.43    1.62
   1   4  22    6.46    1.97
   1  -4  22    2.93    2.09
  -1   4 -22    5.60    2.86
  -1  -4 -22    6.00    1.75
  -1   6  -9  103.05    5.24
   1  -6   9  109.09    4.42
  -1  -6  -9  110.82    4.42
   1   6   9  103.75    5.07
  -4  -4 -14    5.70    1.48
   4   4  14    5.20    2.46
  -4   4 -14    6.07    2.76
   4  -4  14    9.32    3.43
   1  -2  27  349.50    8.11
   1  -2  27  323.27    8.81
  -1  -2 -27  344.37    8.33
   1   2  27  409.55    7.89
  -1  -2 -27  393.06   10.21
  -1   2 -27  385.79   10.86
   2  -6  -7   27.27    2.51
  -2   6   7   28.54    3.08
   2   6  -7   30.63    3.00
   5  -1  18   29.81    3.55
  -5  -1 -18   28.18    3.69
  -5   1 -18   22.42    2.12
  -5  -1 -18   21.88    2.43
   5   1  18   22.47    3.52
  -1   6  10   34.17    3.20
  -1  -6  10   36.42    2.96
   1  -6 -10   35.50    2.80
   1   6 -10   32.68    3.03
  -4   1 -22   25.01    2.32
   4  -1  22   29.36    3.58
  -4  -1 -22   33.14    3.92
  -4  -1 -22   26.53    2.61
   4   1  22   27.99    3.50
  -1   1  29   40.24    5.01
   1   1 -29   67.73    5.39
   1  -1 -29   62.45    5.01
  -1  -1  29   44.69    4.27
   3  -4  18    8.70    3.32
  -3  -4 -18   10.91    2.12
  -3   4 -18   10.35    3.03
   3   4  18    9.14    2.46
   7   0   1    0.03    2.61
   6  -2  10  235.81    8.37
  -6  -2 -10  212.80    6.26
  -6   2 -10  232.19    7.97
   6   2  10  200.46    7.75
  -4  -2  24   24.71    3.28
   4  -2 -24   35.29    3.66
   4   2 -24   29.96    3.59
   6  -2 -15  153.14    5.74
   6   2 -15  145.60    5.93
  -6  -2  15  134.56    5.27
  -6   0 -13    1.26    4.41
   6   0  13   -2.42    2.83
  -6   0 -13   -0.12    1.45
   7   0  -7    4.99    3.40
  -1  -3  26   14.43    2.43
   1   3 -26   18.43    3.58
   1  -3 -26   13.43    2.15
  -1   4  23   13.78    2.06
   1  -4 -23   11.69    2.07
  -1  -4  23    4.39    3.72
   1   4 -23    8.46    3.32
  -1  -4  23   13.49    2.26
   3   3 -24  241.18    7.99
   6   0 -18   18.68    2.92
  -6   0  18   16.54    2.69
  -5  -4  12  503.12    8.86
   5   4 -12  499.21    9.66
   6   3   5   -0.87    2.39
   6  -3   5   -0.41    2.65
  -6  -3  -5    0.67    1.52
   0   4  23   11.38    2.04
   0  -4  23   12.34    2.04
   0  -4 -23   12.28    2.07
   0   4 -23   14.13    3.21
   0  -4  23    5.09    3.01
  -2  -6  -6   35.20    2.84
   2  -6   6   37.55    2.71
   2   6   6   35.82    3.54
  -2  -6  -6   40.65    3.06
  -2   6  -6   31.00    3.49
  -6  -3  10  100.36    3.77
   6   3 -10  100.67    4.81
   6  -3 -10  105.60    4.46
   1  -2 -28   23.29    3.43
  -1  -2  28   19.80    3.05
   1   2 -28   25.77    3.93
  -3  -5  15    0.38    1.31
  -3   5  15    0.53    1.71
   3   5 -15    0.59    2.11
  -5  -4  -8   90.35    4.43
   5  -4   8   78.67    5.57
   5   4   8   90.23    5.35
  -5  -4  -8   96.79    3.67
  -4  -5  10   62.38    3.53
  -4   5  10   53.66    3.81
   4   5 -10   63.43    3.66
   4   5 -10   63.99    3.57
   7  -1  -3   13.41    2.60
   7   1  -3   10.85    2.73
   0   1 -29   46.34    4.63
   0  -1  29   35.82    3.95
   0  -1 -29   46.30    4.38
   0   1  29   29.09    4.28
   0   3 -26  346.75   10.11
   0  -3 -26  287.29    7.60
   0  -3  26  303.55    8.18
   0  -3 -26  350.52    9.17
   0   3  26  351.07    6.98
   2   0 -29    2.85    3.05
  -2   0  29   -1.72    2.71
   7   1  -2  162.80    6.40
   7  -1  -2  150.61    6.12
  -7  -1   2  159.60    4.52
   7  -1  -4   83.27    4.66
   7   1  -4   79.51    4.66
  -2  -1 -27  115.74    6.20
   2  -1  27  120.26    5.21
   2   1  27  115.11    4.90
   2  -1  27   82.72    5.06
  -2  -1 -27   89.06    4.51
  -3  -1 -25   21.35    2.49
   3   1  25   24.89    3.17
  -3   1 -25   19.42    2.42
  -3  -1 -25   26.52    3.80
   3  -1  25   24.30    3.27
   7   0   2  430.63   10.50
   2   6  -8   32.64    3.14
  -2   6   8   32.94    3.27
   2  -6  -8   34.42    2.77
   7   1  -1    6.19    2.57
  -7  -1   1    8.55    1.57
   7  -1  -1    5.94    2.39
   0  -6 -11  196.40    6.14
   0  -6  11  206.00    6.06
   0   6 -11  189.53    6.44
   0   6  11  200.88    6.73
   7   1  -5    3.99    2.35
   7  -1  -5    3.67    2.21
   4   5   7   22.04    3.30
  -4  -5  -7   24.98    2.76
  -4  -5  -7   21.36    2.28
   4  -5   7   25.14    6.46
   0   2 -28    2.66    3.08
   0  -2 -28    2.03    1.71
   0  -2  28    3.48    2.21
   0  -2 -28    4.58    2.94
   7   0  -8  698.72   12.13
   5   0 -23    0.63    2.26
  -5   0  23   -1.69    2.36
   4   0 -26  491.57   10.91
  -4   0  26  352.73   10.42
  -2  -5 -16   48.98    3.48
   2  -5  16   49.33    2.94
   2   5  16   41.23    3.76
  -2   5 -16   42.67    3.72
  -5  -3  18    6.22    1.80
   5   3 -18    8.18    2.74
  -7  -1   0  225.24    5.50
   7   1   0  209.93    7.30
   5  -2 -21   90.16    4.68
   5   2 -21   83.50    4.77
  -5  -2  21   84.75    4.91
  -1  -6 -10    2.80    2.05
   1   6  10    0.05    2.20
  -1   6 -10    0.50    2.35
   1  -6  10    2.21    1.56
   4  -2  21   31.02    3.75
   4   2  21   27.53    3.50
  -4  -2 -21   32.00    4.00
  -4  -2 -21   25.94    2.63
  -4   2 -21   21.53    2.17
  -4   2 -21   31.73    4.14
  -3   0  28  141.00    6.95
   3   0 -28  211.20    7.63
   2  -2  26  252.25    7.57
   2  -2  26  260.74    7.83
  -2   2 -26  275.42    9.38
  -2  -2 -26  266.98    8.45
   2   3  24   57.92    3.81
  -2   3 -24   50.38    4.67
  -2  -3 -24   59.15    4.37
  -2  -3 -24   58.74    3.71
   2  -3  24   53.24    3.72
   2  -3  24   49.56    4.45
   7   1  -6  235.34    7.30
  -5   0 -19    0.93    2.93
   5   0  19   -0.69    2.35
  -5   0 -19    0.28    1.34
  -4  -4  18  373.83    8.60
   4   4 -18  344.80    8.79
  -5  -3 -14   10.62    2.89
  -5   3 -14   10.26    3.06
  -5  -3 -14    8.63    1.94
  -1  -5 -18  735.45   11.77
   1  -5  18  725.51   10.69
  -1   5 -18  667.22   11.65
   1   5  18  662.96   11.64
  -1   6  11   27.28    2.98
   1   6 -11   27.34    2.91
  -1  -6  11   27.83    2.69
   3   2  24  244.83    7.66
   3  -2  24  219.95    7.78
  -3   2 -24  221.19    8.47
  -3  -2 -24  241.34    8.33
  -3  -2 -24  207.39    6.57
  -3  -5 -13    9.20    2.11
   3   5  13    6.13    2.69
  -3   5 -13    5.76    2.64
  -3  -5 -13    7.46    1.80
  -2  -6  -7   89.12    4.23
   2   6   7   90.53    4.88
   2  -6   7   90.87    3.90
  -2   6  -7   84.56    4.94
  -4  -3  22  158.16    5.85
   4   3 -22  174.11    6.53
   5   2  17  212.19    7.98
  -5  -2 -17  213.98    6.49
  -5  -2 -17  229.08    7.95
   5  -2  17  223.88    8.40
  -5   2 -17  226.79    8.26
   7   0   3   -0.59    2.43
  -6  -3  -6  109.25    4.70
   6  -3   6  105.74    6.22
   6   3   6  107.15    5.83
   3   4 -21    2.24    2.57
   2  -4  21    1.44    1.40
  -2   4 -21    0.78    2.76
   2   4  21    0.92    2.01
  -2  -4 -21    1.36    1.61
   6   3 -11    1.83    2.27
  -6  -3  11    0.42    1.30
   7  -1   1    2.94    2.27
   7   1   1    2.83    2.48
  -7  -1  -1    4.59    1.59
  -6  -1 -13   17.77    2.29
   6   1  13   20.68    3.57
  -6  -1 -13   24.57    3.76
  -6   1 -13   21.85    3.82
   6  -1  13   19.63    3.31
   0   5  19  231.25    6.64
   0   5 -19  199.01    6.29
   0  -5 -19  258.95    6.84
   0   5 -19  222.36    7.07
   0  -5  19  252.23    6.77
   7   0  -9    0.23    2.34
   7  -1  -7    1.50    2.58
   7   1  -7    2.58    2.79
  -4  -5  11    3.80    1.57
  -4   5  11    2.73    2.00
   4   5 -11    3.19    1.93
   6   1 -18  242.48    7.54
   6  -1 -18  239.24    7.20
  -5  -4  13   79.70    3.87
   5   4 -13   83.01    4.51
   1  -5 -19   18.17    2.20
  -1   5  19   16.86    2.31
   1   5 -19   16.95    2.99
  -1  -5  19   17.09    2.24
   2  -6  -9   80.58    4.00
   2   6  -9   78.72    4.34
  -2   6   9   74.20    4.45
  -3   3 -22    2.43    2.75
   3  -3  22    1.28    2.53
   3   3  22    1.62    2.02
  -3  -3 -22    1.91    2.56
  -2   5  18  203.44    6.10
   2   5 -18  208.97    6.99
  -6   2 -11   15.32    3.45
  -6  -2 -11   11.16    2.07
   6  -2  11   13.73    3.10
   6   2  11   11.61    3.12
   1   0  29    0.28    2.69
  -1   0 -29   -2.28    3.29
   4   0  23   -1.48    2.38
  -4   0 -23    0.32    3.15
  -4   0 -23    0.23    1.58
  -5  -4  -9   43.77    2.66
   5   4   9   38.43    3.91
  -5   4  -9   43.05    3.75
  -5  -4  -9   39.08    3.09
   5  -4   9   37.61    4.40
   4   4  15   43.03    4.03
  -4   4 -15   59.71    4.85
  -2   1  29  176.16    8.62
   2  -1 -29  273.15    8.82
  -2  -1  29  199.49    7.55
   2   1 -29  280.92    9.34
   6  -2 -16  117.39    5.25
   6   2 -16  118.30    5.47
  -6  -2  16  104.91    4.84
   4   5   8    3.58    2.57
  -4  -5  -8    5.30    1.61
  -4  -5  -8    6.98    2.00
   7  -1   2   35.48    3.58
   7   1   2   42.07    3.95
  -7  -1  -2   43.75    2.71
   4  -3  19   14.65    3.59
  -4  -3 -19   16.22    3.17
   4   3  19   14.27    2.91
  -4   3 -19   16.14    3.53
  -4  -3 -19   13.44    2.31
   7   1  -8  149.24    6.01
   7  -1  -8  144.09    5.78
   5  -1 -23   98.19    5.06
   5   1 -23  106.78    5.44
  -5  -1  23   79.13    4.72
  -5   1  23   62.28    5.35
  -4  -1  26   24.36    3.20
  -4   1  26   18.75    3.65
   4   1 -26   36.38    3.90
   4  -1 -26   33.56    3.72
   7   0   4    1.74    2.26
  -2  -3  26    8.21    2.30
   2   3 -26    9.61    3.28
   2  -3 -26    7.20    1.95
   0   6  12   69.96    4.24
   0  -6  12   66.98    3.75
   0  -6 -12   75.81    3.80
   6   0  14  910.76   16.26
  -6   0 -14  947.34   16.37
  -3   5  16   31.65    2.92
   3   5 -16   37.89    3.38
  -3  -5  16   36.42    2.90
  -2  -2  28    2.29    2.31
   2  -2 -28    3.71    2.77
   2   2 -28    2.42    3.01
   6   0 -19    1.04    2.40
  -6   0  19   -0.89    2.19
   3  -1 -28   69.20    4.86
   3   1 -28   71.36    4.99
  -2  -4  23    0.36    1.51
   2   4 -23   -0.43    2.66
   2  -4 -23   -0.28    1.35
  -2  -6  -8   13.05    2.10
   2  -6   8   12.35    1.89
  -2   6  -8    9.25    2.64
  -2  -6  -8   17.29    2.58
   7   0 -10   16.65    2.85
   1   6  11  450.15   10.04
  -1  -6 -11  476.24    9.14
   1  -6  11  456.68    8.74
   1   0 -30   56.00    4.81
  -1   0  30   43.00    4.46
  -5  -1 -19    0.13    1.48
   5  -1  19    0.07    2.38
   5   1  19    0.45    2.49
  -5   1 -19    0.82    1.37
  -5  -1 -19    1.54    2.84
   6   3   7   42.47    4.28
  -6  -3  -7   48.89    3.44
   6  -3   7   48.25    4.82
  -6  -3  12  355.97    7.06
   6   3 -12  371.73    8.91
   3   4  19   27.28    3.41
  -3   4 -19   34.74    4.00
  -3  -4 -19   33.55    3.19
   1   6 -12    0.07    1.90
  -1   6  12   -0.43    2.08
  -1  -6  12    0.09    1.53
  -7  -1  -3    6.33    1.69
   7  -1   3    3.11    2.33
   7   1   3    4.59    2.66
   1   4  23   75.94    4.13
   1  -4  23   69.43    3.75
  -1   4 -23   66.58    4.94
  -1  -4 -23   73.52    4.02
  -3   0 -26   76.44    5.43
   3   0  26   80.97    4.75
   2   6 -10   47.80    3.49
  -2   6  10   48.66    3.77
  -2  -6  10   50.64    3.49
  -4  -5  12   40.05    2.98
   4   5 -12   38.87    3.16
  -4   5  12   34.77    3.22
   7  -1  -9   41.01    3.57
   7   1  -9   43.64    3.90
   3   6  -1  239.55    7.57
  -3  -6   1  235.50    6.55
   3  -6  -1  246.50    6.30
  -3  -6   1  225.84    6.47
   2   0  28    4.34    2.13
  -2   0 -28    2.70    1.81
   2   0  28    3.29    2.69
  -2   0 -28    6.73    3.34
  -3  -6   2   42.69    3.17
   3   6  -2   40.42    3.58
  -3   6   2   37.46    3.88
   3  -6  -2   45.83    2.90
  -3  -6   2   44.01    3.17
   0   0 -30  679.18   13.93
   0   0  30  549.28   13.44
  -3   6   0    5.87    2.48
  -3  -6   0    8.88    1.97
   3   6   0    7.93    2.39
   3  -6   0    9.36    1.79
  -3  -6   0    8.80    1.92
   3  -2 -27   16.36    3.24
   3   2 -27   15.20    3.42
  -1  -3 -26    4.21    1.72
   1  -3  26    1.35    2.30
   1  -3  26    3.76    2.13
  -1  -3 -26    3.08    2.85
   1   3  26    4.80    1.93
  -1   3 -26    3.84    3.08
  -5  -3  19  625.29   10.97
   5   3 -19  665.52   12.07
   3  -6  -3  246.82    6.15
   3   6  -3  240.18    7.32
  -3  -6   3  244.80    6.83
  -3  -6   3  254.28    6.72
  -4  -2  25  290.93    9.17
   4   2 -25  291.76    8.83
   5   4 -14    0.96    2.07
  -5  -4  14    0.45    1.41
   1  -1  29   -0.57    2.04
  -1   1 -29    1.67    3.20
   1   1  29   -0.12    2.43
  -1  -1 -29    1.56    2.94
   4  -1  23    6.11    2.59
   4   1  23    5.45    2.56
  -4  -1 -23    6.14    1.80
  -4  -1 -23    9.21    3.09
  -4   1 -23    5.11    1.59
   7   0   5   -0.29    2.22
  -2   5 -17  195.61    6.53
   2  -5  17  205.95    5.60
  -2  -5 -17  204.67    6.50
   3  -5  14   62.90    8.70
   3   5  14   62.90    4.47
  -3  -5 -14   69.23    3.94
  -3  -5 -14   60.48    3.46
   3  -6   1    3.99    1.52
  -3  -6  -1    2.39    1.61
  -3  -6  -1    2.46    1.59
   3   6   1    2.02    2.11
   1  -4 -24   19.55    2.40
  -1  -4  24   17.67    2.38
   1   4 -24   17.41    3.51
   3   3 -25   39.27    4.09
   4   5   9  219.44    7.85
   4  -5   9  206.16   12.03
  -4  -5  -9  205.11    5.79
  -4  -5  -9  212.54    6.60
   5   4  10   29.12    3.66
  -5  -4 -10   33.13    2.94
  -5   4 -10   40.13    3.85
   5  -4  10   31.95    4.25
  -5  -4 -10   35.22    2.39
   5  -3  15    8.18    3.17
  -5   3 -15    9.87    3.20
  -5  -3 -15    9.43    2.90
  -5  -3 -15    8.56    1.96
  -4  -4  19    8.77    2.10
   4   4 -19    7.84    2.71
   7   0 -11   -0.24    2.18
   3   6  -4   95.44    4.88
  -3  -6   4   97.11    4.54
  -3  -6   4   98.54    4.37
   3  -6  -4   96.04    4.04
  -3   6   4   83.66    5.01
   0  -4  24   98.74    4.50
   0   4 -24  106.29    5.89
   0   4  24  111.20    4.45
   0  -4 -24  104.87    4.68
   1  -2  28    5.30    2.45
  -1  -2 -28    5.52    2.09
  -1   2 -28    4.38    3.53
  -1  -2 -28    4.95    3.30
   7  -1   4  215.57    7.85
   7   1   4  222.69    7.98
   5  -2 -22    3.65    2.44
  -5  -2  22    1.88    2.15
   5   2 -22    3.03    2.48
   3   6   2   99.17    5.14
  -3  -6  -2   99.36    4.40
   3  -6   2  104.57    4.16
  -3  -6  -2  101.40    4.48
  -2  -6  -9  284.36    7.22
   2  -6   9  275.51    6.75
  -2  -6  -9  277.35    7.37
  -6  -1 -14   37.49    4.27
  -6  -1 -14   28.97    2.71
   6  -1  14   37.27    4.19
   6   1  14   36.85    4.12
  -6   1 -14   38.90    4.60
  -5   0  24  375.40   10.64
   5   0 -24  475.75   10.64
   1  -3 -27    7.35    1.93
  -1  -3  27    6.63    2.24
   1   3 -27    8.47    3.25
  -6   2 -12   50.53    4.67
   6  -2  12   46.87    4.42
  -6  -2 -12   47.21    3.33
   6   2  12   41.77    4.27
   1  -5  19   23.07    2.67
  -1  -5 -19   16.31    2.51
   1   5  19   14.34    2.74
  -1   5 -19   15.03    3.25
   6   2 -17  315.02    8.57
   6  -2 -17  333.39    8.36
  -6  -2  17  318.81    8.18
  -6  -1  19    9.92    2.47
   6   1 -19   13.79    3.07
   6  -1 -19   14.07    2.96
  -6   1  19    7.79    3.21
   7   1 -10  161.90    6.33
   7  -1 -10  152.93    5.94
   1   1 -30  197.53    8.01
   1  -1 -30  191.21    7.57
   3   6  -5  248.64    7.40
  -3  -6   5  250.49    6.95
   3  -6  -5  243.71    6.26
  -3   6   5  241.91    8.18
  -3  -6   5  261.95    6.68
   0   6  13   56.72    3.95
   0   6 -13   47.61    3.77
   0  -6  13   56.36    3.61
   6   3   8  173.15    7.40
   6  -3   8  189.79    8.31
  -5  -2 -18   34.94    3.32
  -5  -2 -18   40.24    4.50
  -5   2 -18   39.74    4.80
   5   2  18   30.64    4.07
   5  -2  18   30.79    4.21
   6   3 -13   24.70    3.13
  -6  -3  13   20.90    2.19
   0  -3  27  152.42    6.51
   0  -3 -27  132.46    5.42
   0   3 -27  154.95    7.26
   5   0  20  132.00    6.41
  -5   0 -20  117.70    4.48
   1  -6  12   18.69    2.35
  -1   6 -12   13.64    2.79
  -1  -6 -12   17.45    2.40
   1   6  12   17.30    2.77
  -2  -5  19   67.34    3.91
  -2   5  19   59.25    3.60
   2   5 -19   62.38    4.59
   3   4 -22  149.86    6.36
   4   3 -23  102.38    5.44
  -4  -3  23   91.87    4.83
  -4   2 -22   31.55    2.50
  -4  -2 -22   45.97    4.46
  -4   2 -22   43.88    4.63
   4   2  22   39.96    3.99
  -4  -2 -22   40.14    3.21
   4  -2  22   35.41    3.96
  -2   6  11   -0.65    2.08
   2   6 -11    0.12    1.91
  -2  -6  11    0.28    1.52
   4   0 -27    0.46    2.79
  -4   0  27   -0.81    2.70
  -1  -2  29   28.41    3.48
   1  -2 -29   36.25    4.08
   1   2 -29   34.92    4.28
  -3   1 -26  154.01    5.52
   3   1  26  195.45    6.91
   3  -1  26  187.67    7.16
  -3  -1 -26  137.48    5.34
  -3  -1 -26  174.89    7.37
   0  -5  20    2.12    1.78
   0  -5 -20    2.11    1.81
   0   5  20   -0.16    1.84
   0   5 -20    0.16    2.78
   3  -6   3   51.85    3.12
  -3  -6  -3   51.89    3.37
  -3  -6  -3   54.39    3.56
   3   6   3   50.57    4.00
  -4   4 -16  571.84   11.85
   4   4  16  478.05   11.21
  -1  -5  20    0.28    1.48
  -1   5  20    0.29    1.62
   1   5 -20    0.47    2.53
   1  -5 -20    0.57    1.47
  -2   0  30  224.43    8.85
   2   0 -30  292.02    9.43
   7   0   6   83.48    5.25
  -3   5  17    1.01    1.79
  -3  -5  17    1.48    1.53
   3   5 -17    1.61    2.26
   2   1  28   16.71    2.59
   2  -1  28   14.01    3.05
   2  -1  28   15.78    2.62
  -2  -1 -28   13.29    2.30
  -2  -1 -28   15.37    3.55
  -1   6  13  254.18    7.53
  -1  -6  13  265.66    7.33
  -4   5  13   33.49    3.20
   4   5 -13   43.32    3.47
  -4  -5  13   40.06    3.01
   0  -1  30    0.82    2.49
   0   1  30    3.18    3.11
   0   1 -30    1.42    3.15
   0  -1 -30    0.91    2.84
  -2   4 -22  259.86    8.53
   2   4  22  278.03    7.88
   2  -4  22  247.78    6.25
  -2  -4 -22  270.71    7.39
  -2   3 -25    0.50    2.86
  -2  -3 -25    1.25    2.62
   2  -3  25    1.12    2.38
   2   3  25    0.08    1.96
  -2  -3 -25    2.03    1.70
  -3  -6   6  149.19    5.10
  -3   6   6  139.41    6.35
   3   6  -6  141.44    5.73
   3  -6  -6  154.81    5.30
  -3  -6   6  143.78    5.43
  -6   0 -15   -0.13    1.85
  -6   0 -15    6.33    4.61
  -7  -2   3  167.12    5.17
   7   2  -3  156.69    6.29
   0  -2 -29  181.05    6.43
   0  -2  29  174.38    7.07
   0   2 -29  196.30    8.15
   0  -2 -29  206.12    7.75
   7   0 -12    0.29    2.16
   7  -1   5  102.64    5.68
   7   1   5  102.08    5.77
   7   2  -2    9.53    2.85
   7  -2  -2    7.49    2.56
  -7  -2   2   10.25    1.88
   6   0 -20  275.13    7.99
  -6   0  20  206.52    7.28
   7  -2  -4    0.26    2.08
   7   2  -4   -0.08    2.41
  -7  -2   4    0.82    1.36
   3   0 -29    1.29    2.78
   2  -2  27  158.45    6.46
  -2  -2 -27  164.88    7.03
   2   2  27  185.13    6.23
  -2   2 -27  172.48    7.88
  -3  -2 -25  329.30    9.66
  -3   2 -25  277.09    9.51
   3   2  25  330.99    8.74
   3  -2  25  330.99    9.43
  -3  -2 -25  277.41    7.60
  -3   6  -4    9.76    2.94
   3   6   4   10.49    2.73
  -3  -6  -4   15.04    2.34
  -3  -6  -4   15.62    2.41
  -7  -2   1   45.94    2.99
   7  -2  -1   35.96    3.68
   7   2  -1   40.08    3.92
   7   1 -11    7.71    3.32
   7  -1 -11    8.31    3.41
  -5  -4  15    2.17    1.56
   5   4 -15    1.85    2.21
   4   5  10   29.36    3.75
  -4  -5 -10   29.45    2.57
  -4  -5 -10   33.94    3.13
   7  -2  -5   81.70    4.65
   7   2  -5   84.73    4.71
   3  -3  23    6.68    2.86
   3   3  23    8.08    2.48
  -3   3 -23    7.31    3.07
  -3  -3 -23    9.44    2.99
  -4   3 -20  230.12    8.40
   4   3  20  211.69    7.56
   4  -3  20  237.29    9.19
  -4  -3 -20  242.71    7.91
  -4  -3 -20  215.42    6.74
   2   6  10    4.56    2.33
   2  -6  10    7.33    1.88
  -2   6 -10    2.83    2.26
  -2  -6 -10    6.24    1.91
  -2  -6 -10    6.25    1.90
  -5   4 -11   73.55    4.79
  -5  -4 -11   62.42    3.94
  -5  -4 -11   68.74    3.21
   5   4  11   61.03    4.74
   5  -4  11   52.49    4.99
   5  -1 -24  532.71   10.92
   5   1 -24  516.07   11.17
  -7  -2   0    4.73    1.66
   7   2   0    3.09    2.58
   7  -2   0    3.48    2.35
   3  -6  -7   68.90    3.72
   3   6  -7   63.90    4.12
  -3  -6   7   63.90    3.49
  -3   6   7   62.39    4.46
  -3  -6   7   64.66    3.85
  -4   0 -24  246.47    9.00
   4   0  24  235.79    8.06
   7  -2  -6    4.23    2.31
   7   2  -6    3.90    2.43
   3   5  15   25.29    3.36
  -3  -5 -15   30.73    2.92
   3  -5  15   36.73    5.89
  -6  -3  -9  248.97    7.08
   6   3   9  225.64    8.37
   6  -3   9  245.32    9.22
   3   4  20  558.80   11.66
  -3  -4 -20  588.17   11.11
  -3   4 -20  582.69   12.25
  -5   1 -20  120.76    4.35
  -5  -1 -20  143.20    6.77
  -5  -1 -20  127.51    5.02
   5   1  20  136.90    6.73
   5  -1  20  145.92    7.10
  -2  -4  24   11.33    2.16
   2   4 -24   12.87    3.32
   2  -4 -24   12.24    2.05
  -6  -3  14   20.48    2.16
   6   3 -14   23.77    3.20
   5   3 -20  148.62    6.24
  -5  -3  20  127.36    5.22
  -4   1  27   27.78    4.30
  -4  -1  27   28.87    3.45
   4  -1 -27   40.18    3.93
   4   1 -27   41.88    4.23
  -3  -6  -5  225.69    6.70
  -3  -6  -5  225.08    6.66
   3   6   5  223.41    7.57
  -2   6  12  171.12    6.30
  -2  -6  12  186.92    6.34
   2   6 -12  169.48    6.07
   7   0   7   -1.75    2.52
   7  -2   1    2.94    2.44
  -7  -2  -1    6.27    1.72
   7   2   1    4.13    2.61
   2  -3 -27  337.11    8.24
  -2  -3  27  349.67    9.24
  -6  -2 -13   41.81    4.25
   6   2  13   36.43    4.29
   6  -2  13   37.61    4.23
  -6   2 -13   40.77    4.50
  -6  -2 -13   38.58    3.09
   2   5  18   22.04    3.03
  -2   5 -18   24.03    3.34
   2  -5  18   16.27    6.10
  -2  -5 -18   23.99    2.73
   2  -5  18   28.48    2.57
  -2   1  30    0.15    3.12
  -2  -1  30    0.50    2.35
   2  -1 -30    1.33    3.03
   2   1 -30    0.58    3.18
   7   2  -7   68.12    4.39
   7  -2  -7   74.37    4.48
   7  -1   6   36.66    3.90
  -7  -1  -6   46.63    3.01
   7   1   6   33.97    4.01
   0   6  14  181.86    6.48
   0  -6 -14  206.15    6.02
   0   6 -14  172.05    6.63
   0  -6  14  196.89    6.11
   6  -2 -18   98.55    4.97
   6   2 -18   90.88    5.13
  -6  -2  18   85.88    4.80
  -5  -3 -16    9.59    2.11
  -5  -3 -16   13.62    3.16
  -5   3 -16   12.29    3.33
   5   3  16   10.95    3.02
   5  -3  16    8.85    3.14
   1   6  13   10.39    2.38
  -1  -6 -13    8.74    1.95
  -1   6 -13    9.75    2.57
  -1  -6 -13   11.88    2.14
   1  -6  13   10.94    1.93
  -1   0 -30  614.10   13.73
   1   0  30  444.32   12.54
  -4  -4  20   52.58    3.58
   4   4 -20   54.21    4.14
   7   0 -13   -0.74    2.25
  -6  -1 -15   74.15    5.43
  -6   1 -15   71.75    5.74
   1  -4  24  245.69    6.75
   1   4  24  272.01    7.30
  -1   4 -24  253.08    8.62
  -1  -4 -24  256.97    7.26
  -4  -5  14  224.54    6.68
   4   5 -14  212.55    6.68
   7  -1 -12  455.99    9.86
   7   1 -12  453.03   10.11
   3  -6  -8    2.08    1.50
  -3  -6   8    3.04    1.67
   3   6  -8    1.74    1.96
  -3   6   8    2.46    2.34
   2   2 -29   65.51    5.32
  -2  -2  29   53.77    4.45
   2  -2 -29   66.92    5.01
   6   1 -20  338.22    8.96
   6  -1 -20  336.54    8.62
   3  -1 -29   -0.19    2.66
  -3   1  29   -1.28    3.00
   3   1 -29   -0.83    2.90
   5   5  -2  274.60    8.21
   5   5  -2  321.40    7.47
  -5  -5   2  305.84    7.78
  -5  -5   2  285.12    6.85
  -1  -6  14   61.13    3.85
  -1   6  14   57.22    4.07
   1   6 -14   53.85    3.95
  -5  -5   3  260.48    6.67
   5   5  -3  267.61    8.17
  -5  -5   1   27.81    2.81
   5   5  -1   22.54    3.26
  -5  -5   1   26.13    2.43
   5   5  -1   34.35    3.24
   5  -5  -1   17.82    5.51
   7  -2   2  215.11    7.78
   7   2   2  220.50    7.83
  -6  -4   2  154.52    4.41
   6   4  -2  162.64    6.03
   6   4  -2  156.63    6.57
  -6  -4   2  155.60    5.67
   6   4  -3  129.43    5.46
   6  -4  -3  111.19    5.97
   6   4  -3  115.52    5.59
  -6  -4   3  120.28    4.05
  -6  -4   3  119.56    5.08
   7   2  -8  173.81    6.47
   7  -2  -8  181.78    6.32
   5   5  -4  768.14   11.13
   5   5  -4  757.18   13.24
  -5  -5   4  772.11   12.15
  -5  -2  23  259.07    8.33
   5   2 -23  271.80    8.32
  -4  -2  26    0.32    2.47
   4   2 -26    0.43    3.02
   4  -2 -26    2.14    2.72
  -5  -5   0    3.13    1.78
  -5  -5   0    2.85    1.56
   5  -5   0    6.39    5.10
   5   5   0    1.86    1.90
   5   5   0    1.52    2.25
   6   4  -1   77.88    5.11
  -6  -4   1   77.73    4.22
   1   5  20   64.29    4.11
   1  -5  20   72.24    3.85
  -1  -5 -20   66.75    3.93
  -1   5 -20   60.52    4.47
  -6  -4   4  269.93    5.90
  -6  -4   4  273.57    7.36
   6   4  -4  274.71    7.51
   3   6   6   26.33    3.49
  -3   6  -6   19.14    3.21
  -3  -6  -6   25.28    2.66
  -3  -6  -6   28.22    2.83
   4   5  11  306.12    9.29
  -4  -5 -11  323.46    8.20
  -4  -5 -11  312.14    7.21
  -3   0 -27   -0.46    1.61
   3   0  27   -0.20    2.23
  -3   0 -27    0.29    3.03
  -3   5  18  119.59    4.95
   3   5 -18  128.23    5.57
  -3  -5  18  122.10    5.19
   1  -4 -25   10.42    2.11
  -1  -4  25   10.77    2.12
   1   4 -25   11.90    3.50
   1   0 -31   -1.05    2.97
  -1   0  31    0.71    2.41
  -2  -6 -11   83.68    4.22
   2   6  11   77.63    4.68
  -2  -6 -11   78.62    4.16
   2  -6  11   83.63    3.85
   3  -2 -28  349.01    9.52
   3   2 -28  318.20    9.93
  -4   1 -24   12.17    1.97
  -4  -1 -24   18.31    3.58
   4  -1  24   16.87    3.21
  -4  -1 -24   11.47    2.07
   4   1  24   15.74    3.06
  -2   5  20   -0.32    1.76
  -2  -5  20    0.15    1.68
   2   5 -20   -0.11    2.70
   4   4  17   14.50    3.20
   4  -4  17   13.06    3.93
  -4   4 -17   19.88    3.82
   3   3 -26    0.30    2.66
  -5  -4  16  138.10    5.55
   5   4 -16  124.54    5.46
   1   3  27   33.47    2.98
  -1  -3 -27   27.22    2.81
  -1   3 -27   29.86    4.22
   1  -3  27   29.86    3.42
  -5  -5   5   39.93    3.03
   5   5  -5   34.52    3.60
  -5  -5   5   37.93    3.25
   6   4   0  245.26    8.23
  -6  -4   0  240.09    6.90
   5   0 -25    0.52    2.55
  -5   0  25   -2.47    2.84
   6  -4  -5  150.70    6.73
   6   4  -5  134.63    5.80
  -6  -4   5  139.56    5.34
   6   4  -5  151.20    5.88
  -6  -4   5  138.56    4.36
  -5  -2 -19  662.66   13.33
  -5   2 -19  659.39   14.18
   5  -2  19  649.54   14.28
  -5  -2 -19  643.82   11.76
  -5  -5  -1    0.15    1.38
  -5  -5  -1    1.10    1.70
   5   5   1    3.44    2.36
   5   5   1    0.18    2.23
   0  -4  25   39.95    3.23
   0   4  25   49.09    3.29
   0  -4 -25   40.75    3.31
   0   4 -25   44.15    4.63
  -5  -4 -12   31.55    2.40
   5   4  12   26.90    3.79
  -5  -4 -12   29.29    2.96
  -5   4 -12   33.62    3.95
   1  -5 -21   46.01    3.23
  -1  -5  21   47.27    3.43
   1   5 -21   44.30    4.13
  -1   5  21   42.45    3.23
   0  -5  21  372.76    8.37
   0  -5 -21  356.18    8.23
   0   5  21  335.02    7.99
   0   5 -21  324.73    8.91
   2   0  29   -0.74    2.66
   2   0  29   -0.51    2.00
  -2   0 -29    1.19    3.20
  -2   0 -29    0.08    1.62
   7  -2   3   14.21    3.02
   7   2   3   11.94    3.19
  -7  -2  -3   16.50    2.21
   3   4 -23   88.54    5.38
  -6   0 -16  728.99   14.70
  -6   0 -16  572.53   10.37
   3  -6  -9   38.67    2.94
  -3  -6   9   40.94    3.15
  -3   6   9   36.66    3.48
   3   6  -9   40.69    3.38
   7  -1   7  127.85    6.44
  -7  -1  -7  135.07    4.71
   7   0   8   57.34    4.61
   6   3  10  168.19    7.44
   6  -3  10  176.80    8.09
  -6  -3 -10  185.32    6.17
  -4  -3  24   45.27    3.74
   4   3 -24   54.38    4.47
   6   3 -15   31.21    3.57
  -6  -3  15   22.84    2.39
  -6   0  21   -0.57    2.25
   6   0 -21    1.25    2.44
  -6  -4  -1   91.08    4.63
   6  -4   1   90.09    5.67
   6   4   1   88.81    5.40
   7   2  -9   57.83    4.21
   7  -2  -9   62.56    4.08
   0   0  31    2.11    3.17
   0   0 -31    2.05    3.53
  -5   0 -21    1.51    3.22
  -5   0 -21   -0.59    1.57
   5   0  21   -3.44    2.62
  -6  -4   6  220.13    6.52
   6   4  -6  212.83    6.98
   6   4  -6  230.95    6.98
  -6  -4   6  230.78    5.68
   2   6 -13   28.53    3.00
  -2   6  13   33.01    3.29
  -2  -6  13   35.39    3.11
  -5  -5   6    3.92    1.82
   5   5  -6    4.55    2.39
  -5  -5   6    3.96    1.72
  -5  -5  -2  175.19    6.08
   5   5   2  177.20    7.14
  -5  -5  -2  172.53    5.28
   5   5   2  176.95    5.61
   1   1  30   45.17    5.21
   1  -1  30   46.37    4.41
  -1  -1 -30   69.50    5.30
  -1   1 -30   74.64    5.83
   7  -1 -13    3.37    2.47
   7   1 -13    2.29    2.70
   7   0 -14  273.07    7.95
   1  -3 -28   48.56    3.58
  -1  -3  28   50.18    4.20
  -1  -2 -29  233.83    8.50
  -1  -2 -29  216.05    7.01
  -1   2 -29  233.96    9.06
  -4   2 -23   25.77    4.15
  -4   2 -23   16.05    2.11
   4  -2  23   21.55    3.56
  -4  -2 -23   19.31    2.57
   4   2  23   20.53    3.31
  -4  -2 -23   25.37    3.89
  -3  -6  -7  152.25    5.65
   3   6   7  146.32    6.46
  -3  -6  -7  139.84    5.20
  -2  -4 -23  112.85    5.00
   2   4  23  115.25    5.42
  -2   4 -23  106.02    6.03
  -4   0  28  377.88   11.40
   4   0 -28  516.32   11.56
   3   5  16   28.06    3.42
  -3  -5 -16   30.30    2.98
  -6  -4  -2  151.82    5.65
   6   4   2  144.38    6.57
   6   4  -7    6.37    2.54
  -6  -4   7    3.81    1.43
  -6  -4   7    4.66    1.79
   1   6  14   22.12    2.93
  -1   6 -14   16.56    2.83
   1  -6  14   22.99    2.40
  -1  -6 -14   25.68    2.77
   0  -6  15   77.57    4.02
   0  -6 -15   74.58    3.90
   0   6  15   70.87    4.33
  -4  -5  15  105.86    4.70
   4   5 -15  124.67    5.51
   0  -3  28   17.65    3.19
   0   3 -28   20.32    3.98
   0  -3 -28   19.06    2.65
   5   5  -7  234.16    7.16
   5   5  -7  249.53    6.72
  -5  -5   7  240.75    6.83
  -5  -5   7  241.99    6.48
  -7  -2  -4    2.95    1.60
   7  -2   4    3.26    2.47
   7   2   4    2.99    2.62
  -5  -5  -3    8.24    1.81
   5   5   3    5.65    2.88
  -5  -5  -3    8.32    2.23
  -6  -2 -14   50.71    4.43
  -6  -2 -14   47.79    3.44
   6   2  14   46.07    4.71
   6  -2  14   52.86    4.82
  -6   2 -14   56.47    5.05
  -3  -1 -27   32.58    3.04
  -3   1 -27   33.94    3.10
   3  -1  27   41.61    4.00
   3   1  27   49.25    4.18
  -3  -1 -27   41.36    4.51
   1  -1 -31   -0.24    3.01
   1   1 -31    0.18    3.16
  -1   1  31    0.39    3.15
  -1  -1  31   -1.90    2.76
  -6  -2  19   -2.48    2.49
   6   2 -19    4.61    3.36
   6  -2 -19    3.81    3.19
  -5  -3  21  457.68    9.90
   5   3 -21  470.26   10.60
  -4   3 -21   10.90    3.43
   4   3  21    7.52    2.80
   4  -3  21    8.91    3.21
  -4  -3 -21    8.40    2.17
  -4  -3 -21   10.41    3.16
   7  -2 -10    0.33    2.41
   7   2 -10    1.03    2.43
  -2   3 -26   68.88    5.44
  -2  -3 -26   68.45    4.13
   2   3  26   75.97    4.43
  -2  -3 -26   71.46    4.92
   2  -3  26   66.01    4.94
  -1  -6  15  358.01    8.22
  -1   6  15  354.64    8.97
   1   2 -30   -0.22    3.05
  -1  -2  30    0.31    2.14
   1  -2 -30   -0.42    2.98
  -5   1  25   -2.25    2.93
   5  -1 -25    0.92    2.54
  -5  -1  25   -3.10    2.53
   5   1 -25   -1.15    2.62
  -3  -6  10    1.37    1.61
  -3   6  10    1.30    2.02
   3   6 -10    1.58    1.95
   3  -6 -10    1.33    1.42
   3  -3  24    8.06    3.12
  -3  -3 -24   10.63    3.09
  -3   3 -24    9.76    3.26
   3   3  24   10.76    2.58
  -2  -6 -12   59.19    3.72
  -2  -6 -12   59.66    3.77
   2  -6  12   55.71    3.36
   2   6  12   51.10    4.13
  -4  -5 -12   22.36    2.36
  -4  -5 -12   25.68    2.90
   5  -3  17    0.21    2.73
   5   3  17    1.65    2.56
  -5  -3 -17    0.97    2.81
  -5  -3 -17    0.93    1.70
  -5   3 -17    0.47    2.96
   6   4   3   79.99    5.23
  -6  -4  -3   86.83    4.45
  -2  -1 -29   25.80    2.86
   2   1  29   31.31    3.11
  -2  -1 -29   33.01    4.29
  -2   1 -29   29.91    4.63
  -2   5 -19    3.66    2.64
   2  -5  19    3.63    1.65
  -2  -5 -19    3.21    1.88
   2   5  19    3.62    2.19
   2   0 -31    0.36    3.13
  -2   0  31   -0.38    2.75
   3  -2  26   -0.78    2.62
  -3  -2 -26   -0.27    3.10
   3   2  26   -1.34    2.44
  -3   2 -26    0.50    3.18
  -3  -2 -26    0.13    1.70
   6   4  -8   67.98    4.18
  -6  -4   8   66.10    3.26
   4   4 -21    0.17    2.39
  -4  -4  21   -0.03    1.61
  -6  -1 -16  234.14    6.63
  -6   1 -16  250.01    9.08
  -3   4 -21    1.13    3.21
   3   4  21    0.36    2.50
   3  -4  21    8.60    3.46
  -3  -4 -21    1.26    2.01
   7   1   8   66.17    5.10
   7  -1   8   77.19    5.36
  -7  -1  -8   81.71    3.82
   5   5  -8   71.49    4.17
  -5  -5   8   54.50    3.31
   6  -1 -21   15.38    3.02
  -6  -1  21    8.61    2.59
  -6   1  21    5.93    3.22
   6   1 -21   15.33    3.17
   3   0 -30   88.94    5.63
   0   1 -31   50.69    5.05
   0  -1  31   39.15    4.34
   0  -1 -31   50.82    4.83
   0   1  31   31.84    4.83
  -5   1 -21   33.37    2.66
   5   1  21   38.27    4.34
  -5  -1 -21   35.92    3.01
   5  -1  21   38.06    4.34
  -5  -1 -21   44.88    4.56
  -2   2 -28   18.48    4.07
  -2  -2 -28   15.31    3.59
   2   2  28   16.38    2.58
   2  -2  28   14.59    2.84
   7   0   9   -0.42    2.51
   0  -2  30  235.39    8.25
   0  -2 -30  247.05    7.58
   0   2 -30  279.65    9.75
   0  -2 -30  297.62    9.47
  -5  -5  -4   30.07    2.99
   5   5   4   28.15    3.67
  -5  -5  -4   28.44    2.44
   5  -5   4   24.62    4.46
  -5  -4  17   84.27    4.42
   5   4 -17   86.13    4.73
   2   4 -25   82.49    5.64
   2  -4 -25   77.51    4.01
  -2  -4  25   71.68    4.21
   3   6   8   22.57    3.41
  -3  -6  -8   27.81    3.12
  -3  -6  -8   25.01    2.62
   4   0  25   -0.20    2.45
  -4   0 -25   -0.23    1.63
  -4   0 -25   -2.09    3.32
   7   1 -14   23.59    3.35
   7  -1 -14   26.34    3.26
  -6  -3 -11  100.50    4.73
  -6   3 -11  108.16    5.93
   6   3  11   87.60    5.79
   6  -3  11   94.45    6.39
   7   2   5   25.26    3.62
  -7  -2  -5   31.23    2.80
   7  -2   5   25.63    3.64
   6   3 -16  282.07    8.30
  -6  -3  16  278.69    7.04
   2   6 -14   11.23    2.43
  -2  -6  14   12.31    2.15
  -2   6  14   11.32    2.51
  -5  -4 -13  121.68    5.50
  -5   4 -13  140.53    6.53
   3   5 -19    3.09    2.66
  -3   5  19    1.65    1.85
   7   0 -15    2.58    2.92
   7   2 -11   79.12    5.02
   7  -2 -11   76.33    4.68
   4  -1 -28   23.12    3.50
   4   1 -28   24.88    3.70
  -4  -1  28   12.97    2.93
  -4   1  28   11.12    3.62
  -6  -4  -4    6.65    2.04
   6  -4   4    4.22    2.93
   6   4   4    3.09    2.71
   6   4  -9   27.64    3.12
  -6  -4   9   24.28    2.25
   4  -4  18   34.17    4.36
   4   4  18   44.99    4.21
   2   5 -21   86.88    5.37
  -2   5  21   86.31    4.19
  -2  -5  21   94.09    4.65
   5  -2 -24   85.88    4.90
  -5  -2  24   72.20    5.13
  -1   5 -21    3.10    2.85
  -1  -5 -21    3.03    1.79
   1  -5  21    3.79    1.76
   1   5  21    2.11    2.07
  -2  -3  28    6.58    2.79
   2  -3 -28    6.71    2.15
   2   3 -28    8.38    3.58
  -1  -4 -25    0.59    1.79
   1   4  25    1.68    2.18
   1  -4  25    4.01    2.95
  -1   4 -25   -0.73    3.31
   1  -4  25    2.21    1.93
   5   5  -9  196.23    6.23
  -5  -5   9  187.98    5.92
  -3  -6  11   57.61    3.77
   3   6 -11   60.38    3.98
  -3   6  11   50.68    3.99
  -5  -5  -5   23.64    2.88
  -5  -5  -5   23.86    2.46
   5   5   5   24.06    3.58
  -6   0 -17   -0.12    1.75
  -6   0 -17    1.48    3.76
  -4  -5  16  437.83    9.37
   4   5 -16  452.94    9.59
  -5  -2 -20    2.34    3.44
  -5   2 -20    1.90    3.53
   5   2  20   -1.88    3.07
   5  -2  20   -3.35    3.24
  -5  -2 -20    1.82    2.16
   6   0 -22  184.09    6.80
  -6   0  22  136.77    6.37
  -1   6 -15   23.35    3.20
   1  -6  15   27.80    2.71
  -1  -6 -15   29.81    2.87
   1   6  15   26.81    3.11
   2  -1 -31   99.63    6.03
  -2  -1  31   76.01    5.77
  -2   1  31   62.55    5.99
   2   1 -31  101.68    6.35
  -4  -2  27  198.54    7.97
   4  -2 -27  236.66    7.99
   1   5 -22  145.32    6.50
   1  -5 -22  149.22    5.46
  -1   5  22  150.00    5.43
  -1  -5  22  153.58    5.78
   0   6 -16    2.29    2.14
   0  -6  16    4.36    1.79
   0   6  16    3.88    2.09
   0  -6 -16    4.13    1.87
   0  -5 -22  104.48    4.78
   0   5  22  100.13    4.68
   0   5 -22  103.41    5.76
  -5   0  26   47.46    4.49
   5   0 -26   67.37    4.66
   3   1 -30  211.19    8.35
   3  -1 -30  206.47    7.97
   2   2 -30   12.40    3.75
   2  -2 -30   15.67    3.68
  -2  -2  30    8.73    2.77
   7  -2   6  131.29    6.61
   7   2   6  120.78    6.54
  -7  -2  -6  138.57    5.15
   1   4 -26  247.16    8.72
   1  -4 -26  218.59    6.65
  -1  -4  26  236.85    7.39
   7   1   9   35.74    4.22
  -7  -1  -9   45.79    3.08
   7  -1   9   42.08    4.36
   3   4 -24   24.67    3.71
  -1   0 -31    2.52    3.76
   1   0  31    1.72    3.46
   3   6   9   73.05    4.94
  -3  -6  -9   80.78    4.52
  -3  -6  -9   74.30    4.02
   3   3 -27    0.14    2.96
   3   5  17   60.09    4.48
  -3  -5 -17   65.85    4.13
   2  -6  13   52.61    3.32
  -2  -6 -13   53.27    3.63
  -2   6 -13   42.07    4.09
   2   6  13   50.43    4.17
   6   4   5    8.17    2.99
  -6  -4  -5    8.84    2.20
   1   6 -16   26.66    3.15
  -1   6  16   27.24    3.25
  -1  -6  16   33.41    3.21
  -6  -4  10   22.84    2.39
   6   4 -10   21.62    2.96
  -4  -1 -25    1.43    3.03
   4  -1  25    0.95    2.46
  -4  -1 -25    1.58    1.57
  -4   1 -25    0.58    1.56
   4   1  25    0.50    2.28
   4   3 -25   51.56    4.68
  -4  -3  25   44.28    3.86
  -6  -2 -15    3.96    3.18
  -6   2 -15    2.17    3.24
  -6  -2 -15    2.62    1.76
  -4  -5 -13    2.45    2.32
  -4  -5 -13    1.41    1.76
   7   2 -12  363.37    9.33
   7  -2 -12  367.49    8.73
   0  -4 -26  305.94    8.02
   0  -4  26  314.54    8.29
   7   0  10   49.67    4.46
   6   2 -20  923.01   14.81
  -6  -2  20  955.97   15.18
   3  -2 -29    1.85    3.12
   3   2 -29    0.62    3.13
   7   1 -15   14.02    3.54
   7  -1 -15   15.45    3.54
  -5   0 -22   75.66    3.93
   5   0  22   82.54    5.47
   5   5 -10  105.68    4.92
  -5  -5  10   95.78    4.32
  -3   0 -28   50.38    3.58
  -3   0 -28   60.30    5.28
  -1   3 -28   83.02    5.98
   1  -3  28   75.17    5.12
  -5  -5  -6  180.09    5.51
   5   5   6  163.51    6.98
  -5  -3  22    9.89    2.39
   5   3 -22   11.99    3.12
   7   0 -16  189.69    6.83
  -6  -3 -12   27.42    3.02
   6   3  12   22.86    3.92
   0  -7   0    0.51    1.57
  -5  -4  18    0.12    1.63
   5   4 -18    0.47    2.22
  -2  -6  15  158.77    5.82
  -2   6  15  131.38    5.64
   0  -7  -1   90.67    4.55
   0  -7   1   90.46    4.47
  -6  -3  17    4.26    1.80
   6   3 -17    8.06    2.77
   1   0 -32    2.21    3.05
  -1   0  32    2.66    2.90
  -3  -6  12   15.70    2.38
  -3   6  12   14.74    2.92
  -4   2 -24  127.86    7.16
   4   2  24  119.03    6.07
  -4  -2 -24  108.34    5.05
  -4  -2 -24  129.05    6.65
   4  -2  24  132.94    6.88
  -2   4 -24   46.65    4.68
   2  -4  24   35.86    4.40
  -2  -4 -24   44.15    3.45
   2   4  24   48.02    3.90
   0  -7   2  143.80    5.58
   0  -7  -2  153.21    5.87
   5  -3  18   26.51    4.17
   5   3  18   20.80    3.55
  -5  -3 -18   25.17    2.90
  -5   3 -18   26.92    4.00
  -5  -3 -18   29.20    3.78
  -6  -1 -17   71.45    4.06
  -6  -1 -17   76.10    5.69
  -6   1 -17   75.85    5.92
  -5   4 -14  298.22    8.97
  -5  -4 -14  274.61    7.93
  -2   0 -30   32.63    4.51
  -2   0 -30   24.05    2.95
   4   6  -2   23.62    3.23
  -4  -6   2   23.19    2.54
  -4   6   2   19.47    3.29
  -4  -6   2   25.36    2.68
  -6  -1  22  112.90    5.54
   6  -1 -22  131.81    5.90
  -2   5 -20   41.61    4.08
   2  -5  20   53.28    5.48
  -2  -5 -20   52.38    3.92
   2   5  20   41.80    3.80
  -4  -4  22  173.38    6.19
   4   4 -22  180.59    7.25
   4   6  -1   30.12    3.58
  -4   6   1   26.37    3.66
  -4  -6   1   35.52    3.18
  -4  -6   1   30.73    2.93
  -4  -3 -22    0.78    2.85
  -4   3 -22    1.05    3.02
   4   3  22    2.10    2.54
   4  -3  22   -0.08    2.79
  -4  -3 -22    0.54    1.70
   1  -3 -29  111.87    5.24
   1   3 -29  126.16    6.88
  -1  -3  29  111.90    6.11
  -6  -4  -6  149.59    5.84
   6   4   6  143.18    6.86
   4   6  -3   -0.45    2.14
  -4   6   3    0.92    2.30
  -4  -6   3    0.05    1.62
  -4  -6   3    0.48    1.56
  -6  -4  11  119.52    4.58
   6   4 -11  126.88    5.60
  -7  -2  -7   -0.16    1.55
   7   2   7    0.04    2.86
   7  -2   7   -0.66    2.51
  -4  -6   0  172.67    6.01
   4   6   0  169.72    6.85
  -4  -6   0  170.92    5.88
   4   0 -29    2.02    3.05
  -4   0  29   -1.91    3.05
  -5   1  26    8.31    3.35
   5  -1 -26   16.99    3.22
  -5  -1  26   10.00    2.72
   0  -7   3   60.47    3.74
   3   5 -20   -0.40    2.57
   0   0 -32  455.44   12.07
   0   0  32  340.23   11.39
   1  -1  31   44.52    4.51
   1   1  31   40.29    5.27
  -1  -2 -30  300.84    9.75
  -1   2 -30  287.44   10.22
  -4   6   4    6.75    2.71
  -4  -6   4   10.83    2.20
   4   6  -4    6.94    2.62
  -4  -6   4    9.43    2.10
   3   4  22  199.38    7.28
  -3   4 -22  194.47    7.87
  -3  -6 -10  182.38    6.06
  -3  -6 -10  200.38    6.59
   7   2 -13  144.54    6.19
   7  -2 -13  157.46    6.07
   5   5 -11    7.99    2.53
  -5  -5  11    5.84    1.79
   4   6   1  207.78    7.58
  -4  -6  -1  204.85    6.31
   7   3  -3    0.88    2.80
   7  -3  -3    3.02    2.89
  -7  -3   3    1.94    1.93
   0  -3 -29    4.59    1.93
   0  -3  29    5.69    2.66
   0   3 -29    5.42    3.39
   4   5 -17   14.13    3.24
  -4  -5  17    9.07    2.28
  -7  -1 -10   97.28    4.27
  -7  -3   2  225.50    6.63
   7   3  -2  196.85    7.24
   7   3  -4  561.47   11.53
  -7  -3   4  576.05   10.23
  -5  -5  -7   12.11    2.01
   5  -1  22    4.78    2.85
  -5   1 -22    4.68    1.68
  -5  -1 -22    5.01    1.87
   5   1  22    7.10    2.99
  -5  -1 -22    6.48    3.39
   2   3  27   18.23    2.95
   2  -3  27   15.99    3.33
  -2   3 -27   19.34    4.16
  -3   3 -25    7.77    3.37
   3  -3  25    3.47    2.71
   3   3  25    7.03    2.46
  -3  -3 -25    7.27    3.06
   0  -7   4   17.06    2.39
  -3   1 -28   51.48    3.71
   3  -1  28   67.27    4.76
  -3  -1 -28   46.47    3.58
  -3  -1 -28   56.43    5.23
   3   1  28   71.33    4.77
   4   6  -5  410.25    9.96
  -4  -6   5  398.20    8.66
  -4  -6   5  404.22    9.00
  -7  -3   1   76.28    4.16
   7   3  -1   65.39    5.03
   7  -3  -1   64.53    5.08
   1  -7   0  163.50    5.75
   1  -7  -1  134.65    5.36
   1   6  16   31.89    3.43
  -1  -6 -16   34.76    3.08
  -1   6 -16   22.72    3.14
   1  -6  16   31.68    2.83
  -7  -3   5    6.54    1.95
   7   3  -5   12.72    3.46
   4   4  19   42.94    4.23
   4  -4  19   35.87    4.64
  -4   4 -19   50.23    4.81
  -4  -6  -2   21.69    2.65
   4   6   2   20.44    3.39
   1  -7   1  126.35    5.14
   2   6  14  345.83    9.42
   2  -6  14  359.26    7.96
  -2  -6 -14  344.29    8.45
   2   4 -26  119.99    6.64
   2  -4 -26  101.04    4.66
   1  -7  -2    3.13    1.97
   7  -1 -16  442.98   10.20
   0  -6  17   57.09    3.60
   0  -6 -17   62.01    3.81
   0   6  17   52.49    3.88
   2   5 -22   27.54    4.06
  -3  -2 -27   86.56    4.64
   3  -2  27  103.87    5.89
  -3   2 -27   95.72    6.38
  -3  -2 -27  106.77    6.25
   3   2  27  116.62    5.75
   1  -2 -31  184.97    7.73
  -1  -2  31  142.39    6.80
  -7  -3   0  286.99    7.44
   7   3   0  265.19    8.76
   1  -1 -32    6.54    3.41
   1   5  22   30.15    3.09
  -1   5 -22   28.05    3.90
   1  -5  22   35.73    3.28
  -1  -5 -22   33.55    3.10
   1  -7   2    7.50    2.19
   7   3  -6   14.16    3.25
  -4  -5 -14  365.77    8.09
  -1   6  17  111.82    5.35
  -6   0 -18  106.26    4.50
  -3   6  13  135.20    5.90
   1  -7  -3  120.85    5.16
  -5  -2  25   31.74    3.69
   5  -2 -25   42.28    4.02
  -4  -6   6    1.43    2.07
   4   6  -6   -1.07    2.71
  -6  -4  -7   11.93    2.30
  -6   0  23   -1.42    2.69
   4   0  26   25.11    3.59
  -4   0 -26   17.86    2.44
  -6  -4  12  157.38    5.34
   6   4 -12  170.12    6.50
  -2  -1 -30   33.19    4.53
  -2  -2 -29   90.01    5.84
  -4  -6  -3  142.94    5.43
   3   5  18  192.56    7.37
   3  -5  18  169.92    7.30
  -6   2 -16   65.38    5.39
  -6  -2 -16   52.86    3.59
  -6  -2 -16   64.44    5.14
   7  -3   1   26.61    3.97
   7   3   1   25.13    3.90
  -7  -3  -1   31.47    3.01
  -7  -2  -8   13.84    2.21
   1  -7   3  142.29    5.41
  -4  -1  29  134.06    7.18
  -4   1  29  103.02    7.18
  -6  -2  21   31.99    3.81
   6  -2 -21   41.31    4.01
  -6  -3 -13   84.74    4.61
  -6   3 -13   97.58    6.43
  -2   6  16   79.86    4.55
   0  -2  31   82.33    5.40
   0  -2 -31  119.09    6.67
   1  -7  -4  121.45    5.06
  -5  -2 -21  254.86    7.54
   5  -2  21  281.73   10.13
  -5  -2 -21  291.33    9.42
  -5   2 -21  288.19   10.00
   5   2  21  277.85    9.27
   7   3  -7  180.02    6.77
   1  -5 -23   70.68    4.09
   1   5 -23   71.33    5.24
   0   1  32   70.87    6.00
   0  -1  32   78.14    5.53
   6   3 -18  120.79    5.73
  -6  -3  18  121.42    5.11
  -5  -5  12   17.19    2.31
   5   5 -12   21.64    3.08
   1  -4  26  284.05    7.65
  -1   4 -26  308.24    9.83
   0   5 -23    1.48    3.08
   0  -5 -23    0.51    1.66
   0  -5  23    5.92    4.85
   0   5  23    1.25    1.93
   0  -5  23    1.75    1.84
  -5  -4  19   17.21    2.55
   5   4 -19   17.59    3.11
   7  -2 -14   48.00    4.07
  -5  -5  -8   95.35    4.13
   4   6  -7  722.43   12.59
  -4  -6   7  712.00   11.86
   2   3 -29  197.11    8.36
   2  -3 -29  165.80    6.16
  -3  -6 -11  121.08    4.99
   3   4 -25   78.88    5.44
   1  -7   4   32.95    2.92
  -5   0  27   -1.82    2.74
   7  -3   2  245.63    9.09
   7   3   2  248.01    8.63
  -5   4 -15  117.00    6.30
  -4  -6  -4    0.47    1.71
   4  -2 -28  281.25    9.01
   7   3  -8  107.38    5.64
  -5  -3  23   36.33    3.62
   5   3 -23   49.14    4.49
   4   3 -26   75.13    5.32
  -7  -1 -11   11.92    2.17
   1   4 -27    2.72    3.43
   1  -4 -27    0.65    1.79
   3  -3 -28  518.12   10.60
   3   3 -28  574.55   13.37
   5   0  23   -0.93    2.66
  -5   0 -23   -0.56    1.65
  -6  -1 -18  117.57    5.11
  -5  -3 -19    1.06    2.03
  -5   3 -19    2.42    3.35
  -5  -3 -19    2.20    3.14
  -4  -5  18  239.98    7.37
   4   5 -18  245.47    7.71
   6   4 -13   62.84    4.60
  -6  -4  13   55.57    3.77
   6  -1 -23    3.13    2.67
  -6   1  23   -1.25    3.15
  -6  -1  23    2.08    2.51
  -4  -6   8  400.75    9.07
   4   6  -8  397.81    9.48
  -4   1 -26   13.40    2.16
  -4  -1 -26   15.03    2.37
   4  -1  26   22.29    3.60
   4   1  26   20.97    3.42
   0  -4 -27   55.41    3.92
   0   4 -27   61.00    5.42
   0  -4  27   54.63    3.99
   1  -7   5  105.84    4.65
   7  -1 -17    9.25    3.43
   3  -1 -31    7.81    3.78
   2  -1 -32  300.82   10.06
   4   4 -23   36.33    4.39
   2  -2 -31  219.39    8.38
   7   3   3  102.07    6.07
   7  -3   3  102.74    6.30
  -7  -3  -3  118.61    5.07
  -3   6  14   79.30    4.77
   3   5 -21   10.61    3.27
  -2   5 -21   93.49    5.51
   2   5  21   98.36    5.36
  -4  -6  -5   72.70    3.93
  -2  -6 -15  406.32    9.52
   2  -6  15  388.90    8.15
   3  -2 -30    6.45    3.35
   7   3  -9  126.56    5.91
  -7  -2  -9   44.27    3.33
  -1  -6 -17   51.49    3.64
   1   6  17   45.18    3.89
   1  -6  17   45.81    3.24
  -5  -5  13  124.77    5.08
   5   5 -13  126.81    5.50
   2  -4  25    8.26    3.22
   2   4  25    4.45    2.41
  -2   4 -25    6.09    3.40
   4  -2  25   85.20    5.95
   4   2  25   85.99    5.41
  -4  -2 -25   94.37    6.08
   1   0  32    0.96    3.10
  -1   3 -29   -1.13    3.55
   1  -3  29    0.35    2.41
   4  -3  23   66.66    5.78
   4   3  23   74.96    5.20
  -4   3 -23   80.43    5.96
  -4  -3 -23   87.32    5.77
  -5  -5  -9    4.89    1.73
   0   6  18    3.79    2.22
  -3   0 -29    0.64    1.80
   3   0  29   -0.50    2.44
  -4  -5 -15    2.83    1.81
   7  -2 -15  197.85    6.79
  -1   6  18   98.81    5.09
   5  -1 -27  101.50    5.74
  -5  -1  27   81.88    5.65
   1  -7   6   13.33    2.25
   3   4  23   12.08    2.95
  -3   4 -23   10.35    3.70
   3  -4  23    9.92    3.60
   4   6  -9    8.76    2.46
  -4  -6   9    9.25    2.41
   4  -4  20   16.38    4.04
   4   4  20   21.13    3.55
  -4   4 -20   27.61    4.13
  -3  -6 -12   27.48    2.80
  -7  -3  -4    6.16    2.36
  -2   6  17   67.56    4.24
  -6   3 -14  228.81    8.71
  -6  -3 -14  211.93    7.01
  -6  -3  19    0.05    1.77
   2   5 -23  185.41    7.62
  -4  -6  -6   47.51    3.36
  -5  -1 -23    0.19    1.84
   5   1  23   -0.59    2.91
   5  -1  23   -1.42    3.03
  -6  -2 -17   28.45    2.94
  -6   0  24   20.67    3.54
   3   5  19  180.41    7.32
   3  -5  19  295.45   10.84
  -6  -4  14  351.12    8.19
   6   4 -14  342.00    9.19
   6  -2 -22    3.90    2.57
  -6  -2  22    2.21    2.21
   5   4 -20  186.87    7.14
  -5  -4  20  175.17    6.20
  -2  -7   1   79.57    4.04
   2  -7  -1   75.13    4.09
   1  -5  23  131.30    5.36
  -1   5 -23  114.43    6.29
   1  -5  23  111.93    7.18
   1   5  23  125.17    5.48
   3   3  26    0.23    2.19
  -3   3 -26   -0.04    3.22
   3  -3  26   -0.66    2.67
  -3  -3 -26   -2.02    3.16
  -2  -7   0   24.83    2.58
   2  -7   0   22.14    2.53
  -7  -1 -12   42.99    3.17
  -2  -7   2  130.27    4.97
   2  -7  -2  142.86    5.60
  -5  -2  26   43.86    4.33
   5  -2 -26   53.37    4.65
   2  -4 -27  116.25    5.05
   2   4 -27  146.03    7.35
  -2  -7  -1   12.52    2.50
   2  -7   1    9.51    2.08
  -2   3 -28  173.28    8.22
   2   3  28  188.73    6.57
  -5   4 -16   89.01    5.77
   1  -2  31  273.51    8.89
  -1  -2 -31  355.76   10.75
  -2  -7   3   61.96    3.57
   2  -7  -3   64.23    3.87
   1  -1  32   31.67    4.24
   1   1  32   29.99    4.95
  -3   6  15    5.97    2.41
  -5  -5  14   47.17    3.49
   5   5 -14   57.13    4.23
  -4   6  10   -0.69    2.24
  -7  -3  -5  272.84    7.57
   3  -1  29  338.38    9.51
   3   1  29  358.12    9.29
  -7  -2 -10  138.49    5.47
  -2  -7  -2  212.51    6.42
   2  -7   2  206.29    6.40
   1  -5 -24  659.38   11.54
   1   5 -24  625.63   12.93
  -5  -2 -22   18.09    2.77
  -5  -5 -10    6.29    1.88
   3  -2  28   21.84    3.40
  -3  -2 -28   20.79    4.13
   3   2  28   22.22    3.33
  -2  -7   4    3.26    1.69
   4   5 -19   61.16    4.73
   0   5 -24   18.93    3.79
   0  -5 -24   20.40    2.59
   0   5  24   20.12    2.68
  -4  -6  -7   84.84    4.35
   7  -2 -16   10.97    3.40
   4   0  27    0.14    2.61
  -4   0 -27    0.65    1.66
  -5  -3  24  306.44    9.15
  -2  -7  -3    3.21    1.75
   2  -7   3    3.11    1.88
   1  -2 -32  103.74    6.39
   3   4 -26   48.59    4.78
   1  -4  27    4.91    2.38
  -1   4 -27    2.87    3.71
  -2  -7   5   33.00    2.70
  -6  -1 -19    0.82    1.78
   1   6  18   20.73    3.06
   1  -6  18   20.99    2.53
  -1   6 -18   13.34    2.99
  -1  -6 -18   20.64    2.75
  -5   0  28  103.20    6.40
  -6   1  24   86.69    6.33
  -6  -1  24  130.61    6.58
  -2  -2 -30   27.83    4.35
  -3  -6 -13   48.32    3.56
  -5   3 -20  124.98    6.93
  -5  -3 -20  126.81    6.46
   3   5 -22  172.78    7.39
  -4  -5 -16  104.10    4.58
   8   0  -1   -1.18    2.76
   4   4 -24  670.03   13.58
   4  -2 -29    2.67    3.26
   6   4 -15  125.52    6.05
  -6  -4  15  121.76    5.08
  -2  -7  -4   10.03    2.39
   2  -7   4    6.99    1.87
   0   6  19  168.65    6.42
   2  -3 -30   16.62    2.71
  -7  -3  -6    4.89    2.25
   0  -2 -32   48.27    5.15
  -4   6  11   38.35    3.77
   2  -5  22   13.55    3.72
   2   5  22   23.72    3.30
  -1   6  19   -0.61    2.11
  -2   6  18    5.40    2.27
  -5   0 -24   74.43    4.14
   1   4 -28  177.69    7.90
   8   0   0    0.43    2.48
  -6   3 -15   27.37    4.41
  -6  -3  20   31.35    3.21
  -4  -6  -8  156.42    5.88
  -5  -5  15  187.17    6.42
   5   5 -15  184.94    6.73
   0   4 -28  295.00    9.99
  -4   1 -27   22.73    2.69
   4   1  27   30.37    4.02
   4  -1  27   34.14    4.14
   2  -7   5  122.43    4.95
  -2  -7  -5  131.61    5.28
  -7  -2 -11  142.74    5.84
   8   0   1   -0.47    2.52
  -3   6  16    5.48    2.50
   5   4 -21    2.57    2.88
  -4   4 -21    6.16    3.45
   4  -3  24  366.31   11.21
   4   3  24  368.02    9.96
   2  -4  26   56.76    5.11
  -2   4 -26   70.06    5.61
  -6  -2 -18   22.55    2.78
   6  -2 -23    1.69    2.68
  -6  -2  23    1.85    2.19
   4   2  26   15.73    3.36
   4  -2  26   14.03    3.33
   3  -4  24   46.08    5.09
  -3   4 -24   53.07    5.12
   3   4  24   52.01    4.29
   7  -2 -17  246.04    7.83
   2   5 -24    6.41    3.52
   3  -2 -31   -0.72    3.30
   2  -2 -32   19.39    4.17
  -5   4 -17   23.34    3.99
   8   1  -1    5.01    2.86
   8  -1  -1    3.71    2.73
  -7  -3  -7  168.99    6.13
  -6   0  25   -1.50    2.85
  -4   6  12   51.22    4.14
   1  -3  30    0.21    2.35
   4   5 -20    2.20    3.04
   2  -7   6  100.52    4.57
  -2  -7  -6  122.36    5.25
  -5  -1 -24  210.42    6.79
   8   1   0   66.86    5.15
   8  -1   0   63.55    4.93
  -1   5 -24  236.51    8.62
   1   5  24  256.57    7.63
   1  -5  24  262.11    7.49
  -6  -4  16   11.76    2.32
   6   4 -16   17.71    3.49
  -4  -6  -9  129.32    5.26
   5  -2 -27  380.67   10.60
   6   5  -2   12.59    3.14
   6   5  -3   79.73    4.54
   6   5  -3   71.33    5.09
   6   5  -4    3.78    2.79
   6   5  -4   15.30    2.97
   2   4 -28    0.30    3.45
   3   3  27   11.49    2.84
   3  -3  27    9.66    3.11
   1   6  19   12.11    2.79
   1   5 -25   -0.74    3.90
  -4  -5 -17    2.34    1.71
   5   5 -16   64.82    4.56
  -6  -5   5   94.65    4.19
   6   5  -5  105.22    5.04
   0   5 -25   -0.87    3.36
   2  -7   7  234.46    6.66
  -2   6  19   52.96    3.88
  -6  -1 -20    8.25    2.24
   0   6  20  126.63    5.73
   3   5 -23   48.02    4.83
  -7  -2 -12   40.10    3.48
  -1   6  20   24.67    3.14
  -6  -1  25   14.18    3.39
  -6   1  25    7.91    3.85
  -7  -3  -8   23.65    2.98
  -6  -3  21    0.06    2.05
   6  -5  -6   91.28    5.99
  -6  -5   6   75.04    3.80
   6   5  -6   87.78    4.76
  -3   6  17  161.76    6.43
  -4   6  13   52.99    4.29
  -3   1 -30  200.98    6.98
   3  -2  29   11.70    3.11
   3   2  29   13.08    2.94
   2  -5  23    5.51    3.79
   2   5  23   10.22    2.81
  -4   0 -28    1.07    1.75
   4   0  28    0.87    2.66
  -4  -6 -10   55.43    3.67
  -6  -5   7    5.94    1.82
   6   5  -7   17.21    2.98
  -1   4 -28  188.18    8.57
  -6  -4  17  150.17    5.65
  -5   0 -25    0.12    1.71
  -5   4 -18    8.45    3.76
  -6  -2  24  113.30    6.02
  -4   4 -22  141.06    7.30
   6   5  -8   56.78    4.11
  -6  -5   8   52.77    3.38
   4   5 -21  265.14    8.68
   5   5 -17  190.61    7.02
   2   5 -25  179.13    7.70
  -6   0  26  137.74    7.51
  -4   6  14    9.28    2.72
  -5  -6   2  125.21    5.17
   2   4  27   26.40    3.44
   3  -4  25   44.87    5.22
  -3   4 -25   52.11    5.20
   3   4  25   52.96    4.42
   4  -1  28  271.77    9.31
   4   1  28  284.87    9.44
  -5  -6   3   52.96    3.70
  -5  -6   1   19.52    2.64
  -7  -2 -13  228.81    7.01
  -6  -5   9   10.58    2.05
   6   5  -9   15.84    3.12
  -5  -6   4    4.90    1.98
  -4  -5 -18   -0.02    1.50
  -5  -6   0  157.06    5.62
   4  -2  27    2.91    2.75
   4   2  27    4.82    2.87
  -4  -6 -11  110.93    4.91
   1   5  25  180.18    6.56
  -1   5 -25  157.74    7.51
  -8  -2   2   27.51    2.92
  -5  -6  -1  166.13    5.74
  -6  -3  22   90.79    5.48
  -1   6  21   79.34    4.71
   0   6  21   65.84    4.41
  -8  -2   1  249.73    6.58
  -6   4 -13   48.09    4.70
   1   5 -26   55.68    5.15
   3   5 -24   37.14    4.50
  -6  -4  18   15.39    2.47
  -6  -1 -21    3.34    2.26
  -5  -6  -2    2.45    1.75
  -6  -5  10    8.65    1.96
   6   5 -10   11.13    2.85
  -6   1  26   89.70    6.79
  -8  -2   0  161.58    5.51
   0   5 -26  122.35    6.86
   3   3  28    2.44    2.62
   3  -3  28    1.18    2.89
  -4   6  15    0.81    2.25
  -5  -6  -3    4.63    1.94
  -8  -2  -1  117.81    4.90
   5   5 -18   52.54    4.51
   2  -5  24    6.86    3.47
  -5   4 -19   85.15    5.96
   4   5 -22    3.40    3.21
   6   5 -11   27.54    3.86
  -6  -5  11   15.19    2.39
  -7  -2 -14    2.55    2.65
  -5  -6  -4   73.44    4.01
  -3   2 -30   20.91    2.99
   4   0  29   -0.32    3.06
  -5   0 -26    0.44    1.72
  -4  -5 -19    9.53    2.07
   2   5 -26   72.93    5.94
  -6   4 -14   21.19    3.93
  -5  -6  -5  108.12    4.78
  -6  -5  12  181.48    6.20
   6   5 -12  185.11    7.00
   0   6  22   28.66    3.31
   5   5 -19   22.33    3.74
  -4   1 -29   38.34    3.43
   3   5 -25   17.77    4.12
  -5  -6  -6  115.45    5.10
   1   5 -27    0.07    3.55
   6   5 -13   60.75    4.61
   0   5 -27   -0.15    3.72
   3   3  29  115.62    6.05
   0   0   0    0.00    0.00

_computing_structure_solution     'SHELXT 2018/2 (Sheldrick, 2018)'
;

_shelx_hkl_checksum   72445

#==============================================================================
#     End of CIF
#==============================================================================
