# Supplementary material for: Solid State Structure and Hydrogen Bonding of Some Cyclic NH Carboximides
Source: MDPI journal article supplement (doi:10.3390/cryst13010150), 2023-01-15
Supplement: s1 [file s1 › 9.cif]

data_9
_audit_creation_date                               2020-08-21
_audit_creation_method                            'by CrystalStructure 4.3'

_publ_section_references
;
    ENTER OTHER REFERENCES

    Rigaku (2018). CrystalStructure. Version 4.3. 
    Rigaku Corporation, Tokyo, Japan.

    Sheldrick, G. M. (2014). Acta Cryst. (2014). A70, C1437.
    SHELXT Version 2018/2

    Sheldrick, G.M. (2008) SHELXL Version 2018/3, Acta Cryst. A64, 112-122.

    Rigaku (1998). REQAB. 
    Rigaku Corporation, Tokyo, Japan.

;


_chemical_formula_sum                             'C6 H9 N O2'
_chemical_formula_moiety                          'C6 H9 N O2'
_chemical_formula_weight                           127.14
_chemical_melting_point                            ?

#==============================================================================
# CRYSTAL DATA
_space_group_crystal_system                        monoclinic
_space_group_name_H-M_alt                         'P 1 21/c 1'
_space_group_name_Hall                            '-P 2ybc'
_space_group_IT_number                             14
loop_
_space_group_symop_id
_space_group_symop_operation_xyz
1   '+X,+Y,+Z'
2   '-X,1/2+Y,1/2-Z'
3   '-X,-Y,-Z'
4   '+X,-1/2-Y,-1/2+Z'
#------------------------------------------------------------------------------
_cell_length_a                                     11.795(8)
_cell_length_b                                     7.040(4)
_cell_length_c                                     7.721(5)
_cell_angle_alpha                                  90.0000
_cell_angle_beta                                   103.355(8)
_cell_angle_gamma                                  90.0000
_cell_volume                                       623.8(7)
_cell_formula_units_Z                              4
_cell_measurement_reflns_used                      264
_cell_measurement_theta_min                        3.90
_cell_measurement_theta_max                        34.30
_cell_measurement_temperature                      173
#------------------------------------------------------------------------------
_exptl_crystal_description                         platelet
_exptl_crystal_colour                              colorless
_exptl_crystal_size_max                            0.100
_exptl_crystal_size_mid                            0.100
_exptl_crystal_size_min                            0.010
_exptl_crystal_density_diffrn                      1.354
_exptl_crystal_density_meas                        ?
_exptl_crystal_density_method                     'not measured'
_exptl_crystal_F_000                               272.00
_exptl_absorpt_coefficient_mu                      0.853
_exptl_absorpt_correction_type                     multi-scan
_exptl_absorpt_process_details                    'REQAB (Rigaku, 1998)'
_exptl_absorpt_correction_T_min                    0.789
_exptl_absorpt_correction_T_max                    0.992

#==============================================================================
# EXPERIMENTAL DATA

_diffrn_ambient_temperature                        173
_diffrn_radiation_type                            'Cu K\a'
_diffrn_radiation_wavelength                       1.54187
_diffrn_measurement_device_type                   'Rigaku XtaLAB P100'
_diffrn_measurement_method                         \w
_diffrn_detector_area_resol_mean                   5.814
_diffrn_reflns_number                              6167
_diffrn_reflns_av_unetI/netI                       0.0512
_diffrn_reflns_av_R_equivalents                    0.0670
_diffrn_reflns_theta_max                           67.810
_diffrn_reflns_theta_min                           3.852
_diffrn_reflns_theta_full                          67.687
_diffrn_measured_fraction_theta_max                0.989
_diffrn_measured_fraction_theta_full               0.991
_diffrn_reflns_Laue_measured_fraction_max          0.989
_diffrn_reflns_Laue_measured_fraction_full         0.991
_diffrn_reflns_point_group_measured_fraction_max   0.989
_diffrn_reflns_point_group_measured_fraction_full  0.991
_diffrn_reflns_limit_h_min                        -13
_diffrn_reflns_limit_h_max                         14
_diffrn_reflns_limit_k_min                        -7
_diffrn_reflns_limit_k_max                         8
_diffrn_reflns_limit_l_min                        -8
_diffrn_reflns_limit_l_max                         9
_diffrn_standards_number                           0
_diffrn_standards_interval_count                   .
_diffrn_standards_decay_%                          ?
_reflns_number_total                               1122
_reflns_number_gt                                  1061
_reflns_threshold_expression                       F^2^>2.0\s(F^2^)
_reflns_Friedel_coverage          0.000
_reflns_Friedel_fraction_max      .
_reflns_Friedel_fraction_full     .

#==============================================================================
# REFINEMENT DATA

_refine_special_details
;
    Refinement was performed using all reflections. The weighted 
    R-factor (wR) and goodness of fit (S) are based on F^2^.
    R-factor (gt) are based on F. The threshold expression of
    F^2^ > 2.0 sigma(F^2^) is used only for calculating R-factor (gt).
;
_refine_ls_structure_factor_coef                   Fsqd
_refine_ls_R_factor_all                            0.0657
_refine_ls_R_factor_gt                             0.0643
_refine_ls_wR_factor_ref                           0.1726
_refine_ls_wR_factor_gt                            0.1706
_refine_ls_number_restraints                       1
_refine_ls_hydrogen_treatment                      mixed
_refine_ls_number_reflns                           1122
_refine_ls_number_parameters                       88
_refine_ls_goodness_of_fit_ref                     1.081
_refine_ls_weighting_scheme                        calc
_refine_ls_weighting_details
           'w = 1/[\s^2^(Fo^2^)+(0.1043P)^2^+0.2748P] where P=(Fo^2^+2Fc^2^)/3'
_atom_sites_solution_hydrogens                     geom
_atom_sites_solution_primary                       direct
_atom_sites_solution_secondary                     difmap
_refine_ls_shift/su_max                            0.000
_refine_diff_density_max                           0.62
_refine_diff_density_min                          -0.29
_refine_ls_extinction_method                       SHELXL
_refine_ls_extinction_coef                         0.042(7)

loop_
_atom_type_symbol
_atom_type_description
_atom_type_scat_dispersion_real
_atom_type_scat_dispersion_imag
_atom_type_scat_source
  'C' 'C'  0.0181 0.0091 
;
International Tables for Crystallography
(Vol. C, Tables 4.2.6.8 and 6.1.1.4)
;
  'H' 'H'  0.0000 0.0000 
;
International Tables for Crystallography
(Vol. C, Table 6.1.1.4)
;
  'N' 'N'  0.0311 0.0180 
;
International Tables for Crystallography
(Vol. C, Tables 4.2.6.8 and 6.1.1.4)
;
  'O' 'O'  0.0492 0.0322 
;
International Tables for Crystallography
(Vol. C, Tables 4.2.6.8 and 6.1.1.4)
;

#==============================================================================
# ATOMIC COORDINATES AND THERMAL PARAMETERS

loop_
 _atom_site_label
 _atom_site_type_symbol
 _atom_site_fract_x
 _atom_site_fract_y
 _atom_site_fract_z
 _atom_site_U_iso_or_equiv
 _atom_site_adp_type
 _atom_site_occupancy
 _atom_site_site_symmetry_order  
 _atom_site_calc_flag
 _atom_site_refinement_flags_posn
 _atom_site_refinement_flags_adp
 _atom_site_refinement_flags_occupancy
 _atom_site_disorder_assembly
 _atom_site_disorder_group
O2 O 0.75968(12) 0.90139(19) 0.60056(17) 0.0422(5) Uani 1 1 d . . . . .
O6 O 0.50196(12) 0.5089(2) 0.2586(2) 0.0455(5) Uani 1 1 d . . . . .
N1 N 0.63281(13) 0.6976(2) 0.4345(2) 0.0336(5) Uani 1 1 d D . . . .
C2 C 0.73293(17) 0.7370(3) 0.5636(2) 0.0345(5) Uani 1 1 d . . . . .
C3 C 0.79836(18) 0.5674(3) 0.6576(3) 0.0425(6) Uani 1 1 d . . . . .
H3 H 0.757922 0.527808 0.752201 0.051 Uiso 1 1 calc R U . . .
C4 C 0.79092(18) 0.4012(3) 0.5297(3) 0.0447(6) Uani 1 1 d . . . . .
H4A H 0.833087 0.433516 0.436701 0.054 Uiso 1 1 calc R U . . .
H4B H 0.829274 0.288954 0.595409 0.054 Uiso 1 1 calc R U . . .
C5 C 0.66660(18) 0.3529(3) 0.4431(3) 0.0402(6) Uani 1 1 d . . . . .
H5A H 0.665900 0.261189 0.345598 0.048 Uiso 1 1 calc R U . . .
H5B H 0.630766 0.289723 0.531830 0.048 Uiso 1 1 calc R U . . .
C6 C 0.59391(16) 0.5211(3) 0.3689(2) 0.0345(5) Uani 1 1 d . . . . .
C7 C 0.9229(2) 0.6206(3) 0.7507(3) 0.0477(6) Uani 1 1 d . . . . .
H7A H 0.959947 0.513349 0.823051 0.057 Uiso 1 1 calc R U . . .
H7B H 0.921722 0.731068 0.827580 0.057 Uiso 1 1 calc R U . . .
H7C H 0.967063 0.651679 0.661426 0.057 Uiso 1 1 calc R U . . .
H1 H 0.5865(18) 0.806(2) 0.379(3) 0.046(6) Uiso 1 1 d D . . . .

loop_
 _atom_site_aniso_label
 _atom_site_aniso_U_11
 _atom_site_aniso_U_22
 _atom_site_aniso_U_33
 _atom_site_aniso_U_23
 _atom_site_aniso_U_13
 _atom_site_aniso_U_12
O2 0.0506(9) 0.0312(8) 0.0401(8) -0.0048(5) 0.0010(6) -0.0042(6)
O6 0.0414(8) 0.0338(8) 0.0514(9) -0.0014(6) -0.0097(6) -0.0016(5)
N1 0.0368(9) 0.0268(8) 0.0342(8) 0.0008(6) 0.0023(6) 0.0010(6)
C2 0.0410(10) 0.0320(10) 0.0287(9) -0.0034(7) 0.0040(7) -0.0021(7)
C3 0.0484(12) 0.0371(11) 0.0359(10) -0.0006(8) -0.0030(9) -0.0008(8)
C4 0.0445(12) 0.0353(11) 0.0476(11) -0.0014(8) -0.0031(9) 0.0050(8)
C5 0.0472(12) 0.0293(10) 0.0379(11) -0.0027(7) -0.0031(8) 0.0021(8)
C6 0.0372(10) 0.0308(10) 0.0326(10) -0.0010(7) 0.0017(8) -0.0017(7)
C7 0.0458(12) 0.0439(12) 0.0447(11) 0.0001(9) -0.0074(9) -0.0008(9)

#==============================================================================
_computing_data_collection
                                'CrystalClear-SM Expert 2.1 b42 (Rigaku, 2015)'
_computing_cell_refinement
                                               'CrystalClear-SM Expert 2.1 b42'
_computing_data_reduction
                                               'CrystalClear-SM Expert 2.1 b42'
_computing_structure_solution
                                      'SHELXT Version 2018/2 (Sheldrick, 2014)'
_computing_structure_refinement
                                      'SHELXL Version 2018/3 (Sheldrick, 2008)'
_computing_publication_material
                                          'CrystalStructure 4.3 (Rigaku, 2018)'
_computing_molecular_graphics                     'CrystalStructure 4.3'

#==============================================================================
# MOLECULAR GEOMETRY

_geom_special_details
;
 All esds (except the esd in the dihedral angle between two l.s. planes)
 are estimated using the full covariance matrix.  The cell esds are taken
 into account individually in the estimation of esds in distances, angles
 and torsion angles; correlations between esds in cell parameters are only
 used when they are defined by crystal symmetry.  An approximate (isotropic)
 treatment of cell esds is used for estimating esds involving l.s. planes.
;

loop_
 _geom_bond_atom_site_label_1
 _geom_bond_atom_site_label_2
 _geom_bond_distance
 _geom_bond_site_symmetry_2
 _geom_bond_publ_flag
O2 C2 1.216(2) . ?
O6 C6 1.217(2) . ?
N1 C6 1.380(2) . ?
N1 C2 1.386(2) . ?
N1 H1 0.978(5) . ?
C2 C3 1.513(3) . ?
C3 C4 1.520(3) . ?
C3 C7 1.526(3) . ?
C3 H3 1.0000 . ?
C4 C5 1.503(3) . ?
C4 H4A 0.9900 . ?
C4 H4B 0.9900 . ?
C5 C6 1.496(3) . ?
C5 H5A 0.9900 . ?
C5 H5B 0.9900 . ?
C7 H7A 0.9800 . ?
C7 H7B 0.9800 . ?
C7 H7C 0.9800 . ?

loop_
 _geom_angle_atom_site_label_1
 _geom_angle_atom_site_label_2
 _geom_angle_atom_site_label_3
 _geom_angle
 _geom_angle_site_symmetry_1
 _geom_angle_site_symmetry_3
 _geom_angle_publ_flag
C6 N1 C2 126.87(16) . . ?
C6 N1 H1 115.8(15) . . ?
C2 N1 H1 117.2(15) . . ?
O2 C2 N1 119.39(17) . . ?
O2 C2 C3 124.24(17) . . ?
N1 C2 C3 116.27(16) . . ?
C2 C3 C4 110.46(16) . . ?
C2 C3 C7 111.18(17) . . ?
C4 C3 C7 113.57(18) . . ?
C2 C3 H3 107.1 . . ?
C4 C3 H3 107.1 . . ?
C7 C3 H3 107.1 . . ?
C5 C4 C3 111.54(17) . . ?
C5 C4 H4A 109.3 . . ?
C3 C4 H4A 109.3 . . ?
C5 C4 H4B 109.3 . . ?
C3 C4 H4B 109.3 . . ?
H4A C4 H4B 108.0 . . ?
C6 C5 C4 113.90(16) . . ?
C6 C5 H5A 108.8 . . ?
C4 C5 H5A 108.8 . . ?
C6 C5 H5B 108.8 . . ?
C4 C5 H5B 108.8 . . ?
H5A C5 H5B 107.7 . . ?
O6 C6 N1 119.17(17) . . ?
O6 C6 C5 123.43(16) . . ?
N1 C6 C5 117.37(16) . . ?
C3 C7 H7A 109.5 . . ?
C3 C7 H7B 109.5 . . ?
H7A C7 H7B 109.5 . . ?
C3 C7 H7C 109.5 . . ?
H7A C7 H7C 109.5 . . ?
H7B C7 H7C 109.5 . . ?

loop_
 _geom_torsion_atom_site_label_1
 _geom_torsion_atom_site_label_2
 _geom_torsion_atom_site_label_3
 _geom_torsion_atom_site_label_4
 _geom_torsion
 _geom_torsion_site_symmetry_1
 _geom_torsion_site_symmetry_2
 _geom_torsion_site_symmetry_3
 _geom_torsion_site_symmetry_4
 _geom_torsion_publ_flag
C6 N1 C2 O2 175.63(17) . . . . ?
C6 N1 C2 C3 -7.9(3) . . . . ?
O2 C2 C3 C4 -148.6(2) . . . . ?
N1 C2 C3 C4 35.1(2) . . . . ?
O2 C2 C3 C7 -21.6(3) . . . . ?
N1 C2 C3 C7 162.14(17) . . . . ?
C2 C3 C4 C5 -55.0(2) . . . . ?
C7 C3 C4 C5 179.34(17) . . . . ?
C3 C4 C5 C6 48.1(2) . . . . ?
C2 N1 C6 O6 177.88(17) . . . . ?
C2 N1 C6 C5 -0.2(3) . . . . ?
C4 C5 C6 O6 161.56(19) . . . . ?
C4 C5 C6 N1 -20.4(3) . . . . ?

loop_
_geom_hbond_atom_site_label_D
_geom_hbond_atom_site_label_H
_geom_hbond_atom_site_label_A
_geom_hbond_site_symmetry_D
_geom_hbond_site_symmetry_H
_geom_hbond_site_symmetry_A
_geom_hbond_distance_DA
_geom_hbond_distance_DH
_geom_hbond_distance_HA
_geom_hbond_angle_DHA
_geom_hbond_publ_flag
N1 H1 O6 . . 2_655 2.908(2) 0.978(17) 1.935(18) 173(2) no

#==============================================================================
# Additional structures and associated data_? identifiers
# should be added at this point if there is more than one 
# structure analysis in the CIF.

_shelx_res_file
;
TITL DSAA10
    shelxl.res
    created by SHELXL-2018/3 at 14:53:51 on 21-Aug-2020
CELL  1.54187 11.79500 7.04000 7.72100 90.00000 103.35500 90.00000
ZERR  4 0.00800 0.00400 0.00500 0.00000 0.00800 0.00000
LATT 1
SYMM    -X, .50+Y, .50-Z
SFAC C H N O
UNIT 24 36 4 8
OMIT    -2   0   2
L.S. 20
FMAP 2
PLAN 3
WPDB -2
HTAB
BOND $H
CONF
LIST 4
TEMP -100.0
ACTA
SIZE 0.010 0.100 0.100
DFIX 0.9800 0.0050 N1 H1
WGHT    0.104300    0.274800
EXTI    0.042404
FVAR       1.77240
O2    4    0.759676    0.901387    0.600562    11.00000    0.05060    0.03123 =
         0.04013   -0.00478    0.00098   -0.00425
O6    4    0.501962    0.508892    0.258601    11.00000    0.04144    0.03379 =
         0.05145   -0.00138   -0.00968   -0.00157
N1    3    0.632806    0.697606    0.434492    11.00000    0.03685    0.02681 =
         0.03418    0.00083    0.00226    0.00104
C2    1    0.732931    0.736996    0.563627    11.00000    0.04101    0.03197 =
         0.02870   -0.00343    0.00404   -0.00210
C3    1    0.798360    0.567429    0.657580    11.00000    0.04843    0.03711 =
         0.03587   -0.00056   -0.00298   -0.00081
AFIX  13
H3    2    0.757922    0.527808    0.752201    11.00000   -1.20000
AFIX   0
C4    1    0.790923    0.401188    0.529732    11.00000    0.04453    0.03531 =
         0.04762   -0.00141   -0.00314    0.00502
AFIX  23
H4A   2    0.833087    0.433516    0.436701    11.00000   -1.20000
H4B   2    0.829274    0.288954    0.595409    11.00000   -1.20000
AFIX   0
C5    1    0.666601    0.352888    0.443051    11.00000    0.04718    0.02932 =
         0.03791   -0.00268   -0.00311    0.00206
AFIX  23
H5A   2    0.665900    0.261189    0.345598    11.00000   -1.20000
H5B   2    0.630766    0.289723    0.531830    11.00000   -1.20000
AFIX   0
C6    1    0.593906    0.521108    0.368902    11.00000    0.03715    0.03081 =
         0.03257   -0.00101    0.00173   -0.00168
C7    1    0.922910    0.620639    0.750740    11.00000    0.04581    0.04391 =
         0.04467    0.00014   -0.00741   -0.00078
AFIX 137
H7A   2    0.959947    0.513349    0.823051    11.00000   -1.20000
H7B   2    0.921722    0.731068    0.827580    11.00000   -1.20000
H7C   2    0.967063    0.651679    0.661426    11.00000   -1.20000
AFIX   0
H1    2    0.586479    0.805880    0.378743    11.00000    0.04624
HKLF 4


REM  DSAA10
REM wR2 = 0.1726, GooF = S = 1.081, Restrained GooF = 1.080 for all data
REM R1 = 0.0643 for 1061 Fo > 4sig(Fo) and 0.0657 for all 1122 data
REM 88 parameters refined using 1 restraints

END

WGHT      0.0971      0.2937

REM Instructions for potential hydrogen bonds
EQIV $1 -x+1, y-1/2, -z+1/2
HTAB C5 O6_$1
EQIV $2 -x+1, y+1/2, -z+1/2
HTAB N1 O6_$2

REM Highest difference peak  0.622,  deepest hole -0.287,  1-sigma level  0.087
Q1    1   0.8410  0.5887  0.5772  11.00000  0.05    0.62
Q2    1   0.7714  0.4082  0.6356  11.00000  0.05    0.42
Q3    1   0.9961  0.5140  0.7635  11.00000  0.05    0.26
;

_shelx_res_checksum   69569

_shelx_hkl_file
;
   1   0   0 2299.66  142.19
   0   0   1    0.51    0.62
   1   0  -1   -0.49    0.53
   1   0  -1   -0.22    1.30
  -1   0   1   -0.11    0.68
   0   1   0    0.41    0.54
   0  -1   0    0.30    0.65
   1  -1   0 4051.69  247.69
   1   1   0 3092.45  189.15
  -1  -1   0 4460.92  271.94
   2   0   0 3816.78  275.96
   1   0   1    0.18    0.62
   2   0  -1    0.36    1.21
   2   0  -1   -0.11    0.54
   0   1   1 5011.71  305.46
   0  -1   1 4391.25  267.74
   1   1  -1 1069.67   71.30
   1  -1  -1 1045.29   63.88
  -1  -1   1  974.80   59.57
   1  -1  -1  791.96   56.22
   2   1   0    2.98    0.67
   2  -1   0    3.37    0.77
   1  -1   1  689.52   42.12
   1   1   1  661.01   42.15
  -2  -1   1 4633.15  298.47
   2  -1  -1 3540.37  226.85
   2  -1  -1 4584.76  322.35
   2   0   1   -0.18    0.78
  -1   0   2 3804.40  231.91
  -1   0   2 3161.15  192.73
   3   0   0  161.24   12.38
   3   0  -1    0.45    0.74
   3   0  -1    0.78    1.21
   0   0   2  354.99   22.36
   0   0   2  335.94   25.58
   2   1   1 2683.37  181.31
   2  -1   1 2553.10  185.02
   2   0  -2 6502.30  553.12
   0  -2   0 1773.99  116.63
  -1   1   2  143.37    8.86
   1   1  -2  167.35   11.98
  -1  -1   2  162.55   10.04
   1  -1  -2  135.94    8.50
   1   2   0  449.77   31.33
  -1  -2   0  531.55   37.95
   1  -2   0  511.55   34.28
   1   2   0  524.82   34.39
   3  -1   0   29.38    2.37
   3   1   0   29.78    2.41
   1   0   2  830.99   50.86
   3  -1  -1    1.46    0.68
   3   1  -1    0.16    0.66
   3   1  -1    0.89    0.91
   3  -1  -1    0.63    1.39
   0   1   2  978.29   59.80
   0  -1   2  923.11   57.61
   0   1   2  879.89   53.98
   0  -2   1  214.90   13.38
   0   2   1  211.85   13.16
   0   2   1  188.07   11.69
   2  -1  -2 5754.98  363.51
  -2  -1   2 6278.12  390.97
   2  -1  -2 5890.80  366.41
  -1  -2   1  142.05    8.85
   1  -2  -1  137.11    9.17
   1  -2  -1  154.70    9.88
   3   0   1   -0.18    0.73
   3   0  -2 9003.29  677.68
   3   0  -211919.40 2018.88
   1  -1   2  237.95   15.28
   1   1   2  262.70   16.14
   1   1   2  249.33   16.10
   2   2   0 2029.43  134.16
   2  -2   0 2029.51  142.52
   2   2   0 1794.48  122.37
   1  -2   1 4740.65  352.41
   1   2   1 5291.49  357.85
   1   2   1 5120.00  317.09
   4   0  -1    4.66    0.74
   4   0  -1    0.01    0.96
  -2  -2   1   91.41    5.87
   2  -2  -1   63.20    4.11
   2   2  -1   69.56    4.78
   2   2  -1   74.05    4.82
   4   0   0 1731.21  120.00
   3   1   1    1.61    0.60
   3  -1   1    1.38    0.64
   2   0   2  635.37   40.28
   3  -1  -2  435.50   28.11
   3   1  -2  402.30   29.57
  -3  -1   2  516.12   31.65
   3  -1  -2  448.79   37.44
   3   1  -2  464.67   32.19
   4  -1  -1 2248.87  153.15
   4   1  -1 1893.83  138.89
   4   1  -1 2642.34  179.11
   4  -1  -1 1719.68  257.72
   2   2   1  765.08   50.46
   2   2   1  886.83   55.17
   2  -2   1  907.09   59.37
   4  -1   0  155.99   10.58
   4   1   0  153.98   10.40
   2   1   2  173.42   10.80
   2  -1   2  168.12   11.00
   1  -2  -2 1514.17  100.78
   1   2  -2 1874.58  129.28
  -1   2   2 1629.61  100.17
  -1  -2   2 1633.83  108.10
   3  -2   0 5266.75  406.37
   3   2   0 6112.55  439.25
   4   0  -2    3.97    1.03
   4   0  -2    4.18    0.70
   3  -2  -1 2752.14  182.58
   3   2  -1 2392.30  167.10
   3   2  -1 2115.92  204.85
   3  -2  -1 1227.82  341.89
  -1   0   3    0.11    0.53
  -1   0   3   -0.30    0.48
   0   2  -2 6121.18  423.40
   0  -2   2 6157.38  379.35
   2   0  -3    0.40    0.51
   2   0  -3    1.16    1.13
  -2   0   3    1.51    0.57
   0   0   3    0.16    0.52
   0   0   3   -0.08    0.52
  -2  -2   2  680.14   41.91
   2  -2  -2  549.42   48.15
   2   2  -2  832.02   51.52
   4   1  -2 1634.42  114.51
   4  -1  -2 1950.00  126.93
   4  -1  -2 1351.33  112.92
   4   1  -2 1902.91  143.56
   1  -2   2 4502.20  277.68
   1   2   2 4618.82  281.84
   1   2   2 4428.08  271.92
   1  -2   2 4752.53  291.70
  -1   1   3 4201.47  256.19
  -1   1   3 3808.43  232.76
   1   1  -3 4404.98  273.29
  -1  -1   3 4113.99  251.17
   1  -1  -3 3672.79  225.27
   3   0   2 2657.90  175.76
  -2   1   3 1409.79   91.92
   2   1  -3 1564.10  121.87
   2  -1  -3 1810.50  111.39
   2  -1  -3 1296.12   79.61
  -2  -1   3 1613.84   98.47
   3   0  -3    0.59    1.25
   0  -1   3   30.83    2.01
   0   1   3   31.84    2.11
   0   1   3   33.12    2.17
   0   1   3   37.45    2.50
   0  -1   3   32.77    2.20
   0   1   3   35.78    2.38
   5   0  -1   -0.26    0.58
   5   0  -1   -0.23    0.60
   5   0  -1   -0.36    1.07
   4   1   1  415.29   28.45
   4  -1   1  457.69   35.25
   4  -1   1  442.90   32.45
   0  -3   0    0.33    0.64
   0   3   0    0.18    0.62
   3  -2   1 1497.13  113.56
   3   2   1 1297.50   82.96
   3  -2   1 1285.43   86.43
   1   0   3    0.31    0.48
   1   0   3    0.66    0.73
  -3   2   2  442.85   27.30
   3  -2  -2  255.39   53.43
   3   2  -2  505.72   31.67
   3   2  -2  344.10   22.51
  -3  -2   2  457.29   29.52
   3  -2  -2  380.43   24.32
   3   2  -2  427.20   31.39
  -3  -2   2  478.90   30.20
  -3   2   2  421.59   28.22
  -1   3   0   83.38    6.05
   1  -3   0   72.77    5.60
   1   3   0   77.48    5.08
   1   3   0   69.44    4.67
  -1  -3   0   79.29    5.57
   5   0   0  448.72   33.78
   5   0   0  527.22   36.85
   3  -1   2  215.40   15.82
   3   1   2  212.85   14.20
   3  -1   2  235.98   16.78
   3   1   2  265.47   18.25
   4  -2  -1  226.19   15.80
   4   2  -1  228.96   15.59
   4   2  -1  198.49   14.05
  -4   2   1  255.87   17.86
   0  -3   1  822.98   58.88
   0   3   1  768.13   47.69
   0   3   1  776.55   55.43
   0  -3  -1  843.83   54.32
   3   1  -3  747.28   46.22
  -3  -1   3  723.00   44.53
   3   1  -3  636.07   43.91
   3  -1  -3  673.17   57.72
  -3  -1   3  724.78   45.44
  -3   1   3  657.91   42.73
   3   1  -3  496.24   32.68
   5   1  -1  449.18   30.43
   5   1  -1  507.49   35.13
   5  -1  -1  556.65   40.02
   5  -1  -1  445.77   32.05
  -5   1   1  543.26   41.05
  -1  -3   1   18.77    1.61
  -1  -3   1   17.53    1.53
   1  -3  -1   18.25    1.37
  -1   3   1   21.76    1.62
  -1   3   1   16.60    1.37
  -4   2   0 2457.05  168.64
   4  -2   0 2288.80  164.32
   4  -2   0 2294.99  156.41
   4   2   0 2253.18  148.77
   4   2   0 2718.52  195.50
   1  -1   3 1108.88   72.83
   1  -1   3  984.83   65.41
   1   1   3  981.05   60.66
   1   1   3  899.18   56.10
   1   1   3 1017.23   63.39
   1   1   3 1060.87   69.74
   1  -1   3 1044.20   64.37
   2   2   2  194.55   12.48
   2   2   2  197.53   12.45
   2   2   2  222.09   15.53
   2  -2   2  182.89   11.78
   2  -2   2  203.97   14.35
   5   0  -2  159.96   10.97
   5   0  -2  152.98   11.01
   5   0  -2  129.74   13.90
   5  -1   0 1682.33  118.77
   5   1   0 1725.86  126.08
   5  -1   0 1828.22  127.01
   5   1   0 1624.69  115.28
   2   3   0  957.79   66.36
   2   3   0 1053.84   66.17
   2  -3   0  982.46   68.09
  -2   3   0 1088.37   74.92
   1  -3   1  249.73   17.04
   1   3   1  217.92   14.44
   1  -3   1  234.49   17.31
   4   0  -3   -0.52    0.51
   4   0  -3   -0.42    1.07
  -2  -3   1  655.85   45.98
   2   3  -1  679.93   44.56
   2   3  -1  546.40   38.87
  -2  -3   1  626.15   44.19
   2  -3  -1  562.02   38.62
  -2   3   1  611.89   38.21
  -2   3   1  681.09   47.13
   2   0   3    0.44    0.56
   2   0   3   -0.13    0.74
  -5   1   2  190.13   13.24
   5   1  -2  251.17   18.49
   5   1  -2  180.67   12.80
   5   1  -2  198.24   14.40
   5  -1  -2  208.62   13.93
   4   2  -2  442.53   31.72
   4   2  -2  651.93   41.18
   4  -2  -2  501.58   32.16
   4   2  -2  511.40   36.75
   4   2  -2  472.76   29.75
  -4   2   2  534.43   35.02
  -1   2   3 1455.80   99.50
  -1  -2   3 1368.64   83.60
  -1  -2   3 1483.42   90.96
   1   2  -3 1678.17  110.40
  -1   2   3 1352.59  115.03
  -1   2   3 1670.66  104.38
  -1   2   3 1418.91   89.02
   1  -2  -3 1651.49  105.14
   5   0   1    1.87    0.70
   5   0   1    1.46    0.61
   4   0   2 3431.30  236.30
   4   0   2 3208.09  229.78
   4   0   2 3451.06  256.74
   4  -1  -3  484.05   44.90
   4   1  -3  613.24   38.59
   4   1  -3  470.88   31.07
   4  -1  -3  524.51   33.09
   4   1  -3  584.07   39.10
   2  -2  -3   67.51    5.26
  -2  -2   3   88.74    5.67
   2   2  -3   97.76    6.27
  -2   2   3   76.78    5.15
  -2  -2   3   94.24    6.03
  -2   2   3   82.40    5.58
  -2   2   3   85.03    5.72
   0  -2   3 2063.65  127.35
   0   2  -3 2116.45  150.90
   0  -2   3 1920.57  117.97
   0   2   3 2138.83  131.10
   0   2   3 2254.28  142.18
   0   2   3 2104.33  149.82
   0   2   3 2292.91  142.24
   2  -3   1   65.84    4.74
   2   3   1   58.01    3.75
   2  -3   1   70.56    4.87
  -2   3  -1   71.73    5.32
   2   3   1   64.64    4.37
   4  -2   1  288.09   20.61
   4  -2   1  328.41   22.96
   4   2   1  291.23   20.88
   4   2   1  340.39   24.98
   2   1   3    2.90    0.55
   2  -1   3    3.46    0.68
   2  -1   3    3.78    0.73
   2  -1   3    3.56    0.73
   2   1   3    3.58    0.79
   2   1   3    3.28    0.51
  -1  -3   2 1257.28   94.46
  -1  -3   2 1139.81   72.89
   1   3  -2 1307.01   81.20
  -1   3   2 1302.88   84.50
  -1   3   2 1271.88   84.02
  -1   3   2 1291.68   80.15
   3   3   0    7.40    1.25
   3   3   0    7.58    1.28
   3  -3   0    6.88    0.81
   3  -3   0    8.36    1.42
  -3   3   0    8.69    1.46
   3   3   0    8.03    0.89
   3  -3  -1   29.94    4.44
   3   3  -1   26.67    4.01
   3   3  -1   30.77    4.52
   3   3  -1   34.45    5.16
  -3   3   1   31.28    4.77
  -3   3   1   36.39    5.39
  -3  -3   1   30.58    4.58
  -3  -3   1   29.59    4.38
   3   2   2   13.98    2.13
   3  -2   2   12.92    2.04
   3  -2   2   15.00    2.33
   3   2   2   14.54    2.22
   3   2   2   16.17    2.55
   0   3   2 1231.31  181.72
   0   3   2 1356.65  199.16
   0  -3   2 1238.48  185.17
   0  -3   2 1101.36  168.64
   0   3   2 1247.38  182.35
   0   3   2 1311.93  190.24
   5  -1   1  891.47  132.33
   5  -1   1  971.44  146.70
   5   1   1 1146.91  172.12
   5   1   1 1092.55  163.62
   5   1   1  940.42  138.64
   4   1   2 2229.74  332.89
   4  -1   2 2375.70  352.97
   4   1   2 2329.32  353.36
   4   1   2 2029.05  301.17
   4  -1   2 2126.62  314.48
   6   0  -1    1.51    0.61
   6   0  -1    1.31    0.56
  -3  -2   3  156.56   22.74
  -3   2   3  145.85   21.60
   3   2  -3  148.92   22.04
  -3  -2   3  156.04   22.79
   3  -2  -3  115.03   19.96
   3   2  -3  150.93   22.25
  -3   2   3  135.56   20.07
  -2   3   2  914.72  134.76
  -2   3   2  894.89  131.94
  -2   3   2  815.84  119.63
   2   3  -2  664.83   98.02
   2   3  -2  910.38  132.40
  -2  -3   2  867.60  126.72
   2   3  -2  881.88  131.53
  -2  -3   2  811.36  118.19
   5  -2  -1 1031.47  151.87
   5   2  -1  922.42  135.70
   5  -2  -1 1025.50  151.46
   5   2  -1 1156.75  170.27
  -5   2   1 1206.63  178.68
   1   2   3    8.48    1.43
   1  -2   3    7.61    1.29
   1   2   3    8.74    1.53
   1   2   3    7.94    1.33
   1  -2   3    8.23    1.38
   5   0  -3    0.29    1.15
   5   0  -3    0.57    0.58
   5   0  -3    0.84    0.54
  -1   0   4   41.42    6.08
  -1   0   4   33.18    4.85
   1   0  -4   40.80    6.08
  -1   0   4   37.13    5.44
  -1   0   4   39.71    5.89
   5  -2   0   55.24    8.35
   5  -2   0   58.99    8.89
   5   2   0   58.92    8.81
  -5   2   0   62.16    9.27
   5   2   0   50.89    7.58
   1  -3   2 1886.26  276.86
   1   3   2 2272.23  330.74
   1  -3   2 2130.42  322.95
   1   3   2 2508.11  371.64
   2   0  -4  237.83   34.51
  -2   0   4  228.69   33.15
   6   0   0  181.25   27.18
   6   0   0  155.09   23.08
   3   0   3    1.35    0.71
   3   0   3    1.68    0.64
   3   0   3    1.68    0.62
   6   1  -1  118.76   17.69
   6   1  -1  139.48   20.67
   6  -1  -1  131.99   19.89
  -6   1   1  129.42   19.22
   6  -1  -1  130.63   19.31
   6   0  -2   33.23    5.44
   6   0  -2   28.85    4.31
   6   0  -2   34.49    5.20
   0   0   4   14.31    2.20
   0   0   4   15.60    2.41
   0   0   4   13.83    2.09
   0   0   4   12.99    1.99
  -3   3  -1 4071.71  597.92
   3   3   1 3424.46  499.20
   3  -3   1 3287.01  502.74
   3  -3   1 3644.80  543.95
   3   3   1 3057.81  446.65
   3   0  -4  553.04   80.20
   5   2  -2 1826.79  268.67
   5   2  -2 1292.85  190.40
   5  -2  -2 1457.75  213.61
  -5   2   2 1648.77  243.10
   5   2  -2 1638.95  243.52
   3   3  -2   52.47    7.85
  -3  -3   2   49.40    7.46
  -3   3   2   50.07    7.43
  -3  -3   2   45.42    6.71
   3  -3  -2   43.69    6.42
  -3   3   2   48.20    7.25
  -3   3   2   55.23    8.12
   5   1  -3    1.29    1.03
   5   1  -3    1.26    0.56
   5  -1  -3    0.77    1.06
   5  -1  -3    0.33    0.48
  -5   1   3    1.27    0.66
  -1   1   4  201.59   33.67
   1  -1  -4  308.34   44.72
  -1   1   4  290.81   42.50
   1   1  -4  309.25   44.79
  -1   1   4  259.33   37.54
  -1  -1   4  288.54   41.77
  -1   1   4  284.24   41.18
  -1  -1   4  290.62   42.29
  -1  -1   4  297.13   43.10
  -2  -1   4  149.71   21.70
   2  -1  -4  162.61   23.66
   2   1  -4  151.55   22.21
  -2  -1   4  139.82   20.27
  -2   1   4  136.38   19.88
  -2   1   4  130.69   19.01
  -2   1   4  146.63   21.28
  -6   1   0  190.48   29.50
   6   1   0  216.56   32.90
   6  -1   0  212.84   31.97
   6   1   0  211.92   31.86
   6  -1   0  231.78   34.65
   3  -1   3    0.23    0.60
   3  -1   3    0.09    0.64
   3   1   3    0.79    0.51
   3  -1   3    0.51    0.69
   3   1   3    0.65    0.55
   3   1   3    0.26    0.79
   4  -2  -3   13.38    4.32
   4   2  -3   35.80    5.34
  -4   2   3   30.40    4.59
  -4   2   3   31.24    4.69
  -4  -2   3   29.89    4.44
   4  -2  -3   27.07    3.99
   4   2  -3   28.77    4.31
  -4  -2   3   31.56    4.73
  -4   3   1  182.21   27.30
   4   3  -1  164.40   23.98
   4   3  -1  190.36   28.19
   4   3  -1  157.58   23.37
   4  -3  -1  178.63   26.26
   6   1  -2  243.19   36.60
   6  -1  -2  198.03   33.77
  -6   1   2  248.46   37.47
   6  -1  -2  184.78   40.46
   6   1  -2  198.33   29.38
   6  -1  -2  206.08   31.63
   6   1  -2  233.55   34.93
   2   2   3  462.39   67.97
   2   2   3  424.38   65.55
   2   2   3  358.18   52.42
   2  -2   3  359.35   53.41
   2   2   3  336.96   49.14
   2  -2   3  402.01   59.78
   4  -3   0  181.82   28.52
   4   3   0  164.07   24.62
   4  -3   0  196.82   29.58
  -4   3   0  214.02   31.53
   4   3   0  164.75   25.48
   4   3   0  197.27   29.99
   0   1   4   42.87    6.30
   0  -1   4   33.12    4.84
   0   1   4   25.09    4.39
   0  -1   4   38.09    5.59
   0   1   4   34.95    5.14
   0  -1   4   22.68    3.37
   0   1   4   35.00    5.13
   0   1   4   26.69    4.68
   2  -3   2  400.49   58.92
   2   3   2  450.45   66.79
   2   3   2  405.66   59.03
   2  -3   2  424.55   62.25
   3  -1  -4  504.43   76.91
  -3   1   4  585.68   85.09
  -3  -1   4  482.52   69.87
   3   1  -4  418.56   75.80
  -3   1   4  604.47   89.60
  -3  -1   4  543.53   86.16
   3   1  -4  733.99  106.31
   1   0   4   21.85    3.36
   1   0   4   25.96    3.84
   1   0   4   23.69    3.72
   1   0   4   28.53    4.23
   1   0   4   26.61    3.94
   5   0   2 8363.02  645.50
   5   0   2 9876.98  759.45
   5   0   2 6600.16 1234.34
  -5   2  -1    2.88    0.68
   5  -2   1    2.47    0.72
   5   2   1    2.92    0.74
   5  -2   1    2.29    0.77
   5   2   1    2.26    0.58
   4   2   2  346.99   51.11
   4   2   2  318.25   46.79
   4   2   2  407.81   60.50
   4  -2   2  352.19   52.70
   4  -2   2  335.95   50.15
   4   0  -4  503.26   75.07
   4   0  -4  439.66   67.65
   0   4   0    4.65    0.88
   0  -4   0    3.74    0.81
   0  -4   0    4.51    0.93
   6   0   1    1.72    0.71
   6   0   1    2.91    0.81
   6   0   1    1.53    0.76
  -1  -4   0 2448.54  370.83
  -1   4   0 2822.08  413.44
   1  -4   0 2477.46  366.11
  -1  -4   0 2461.80  368.71
   1  -4   0 2517.73  374.00
   1   4   0 2696.51  399.01
  -1   4   0 2498.19  376.25
  -4   3   2    1.88    0.57
   4   3  -2    4.86    0.99
   4  -3  -2    0.06    0.75
  -4   3   2    2.04    0.85
   4  -3  -2    1.68    0.53
   1   3  -3   14.85    2.33
  -1   3   3   11.40    1.87
  -1  -3   3   11.63    1.90
  -1  -3   3   11.44    1.87
  -1   3   3   11.91    1.89
   1  -3  -3    6.16    1.63
  -1   3   3   12.03    1.92
  -1   3   3   12.21    1.91
   1   1   4  661.31   96.70
   1  -1   4  723.50  104.96
   1   1   4  693.30  102.67
   1   1   4  554.91   80.36
   1  -1   4  564.87   81.70
   1   1   4  619.37   89.73
   1  -1   4  511.28   78.53
   1   1   4  545.54   80.70
   1  -1   4  496.70   87.75
   5  -1   2  187.55   27.97
   5   1   2  154.89   23.61
   5   1   2  184.28   27.54
   5  -1   2  169.41   25.12
   5  -1   2  159.47   24.15
   5   1   2  146.17   21.77
   6   0  -3    0.27    0.62
   6   0  -3    0.27    1.13
   2   3  -3  358.22   51.89
  -2   3   3  316.37   46.70
  -2   3   3  294.95   44.33
  -2   3   3  358.16   51.92
  -2  -3   3  334.18   49.36
  -2  -3   3  316.80   47.05
  -2   3   3  330.37   48.08
   2  -3  -3  158.03   38.38
  -4   1   4 2157.76  314.55
   4   1  -4 1697.47  276.74
   4  -1  -4 1783.30  306.11
   4   1  -4 2466.93  357.86
   6   2  -1    1.48    0.69
  -6   2   1    0.65    0.67
   6  -2  -1    1.74    0.71
   6   2  -1    1.13    0.59
   6  -2  -1    1.69    0.58
   0   4   1   19.58    2.97
   0  -4   1   14.99    2.62
   0  -4   1   19.04    2.94
   0   4   1   18.61    2.83
   0  -3   3 1504.48  222.09
   0   3   3 1465.94  217.12
   0   3   3 1236.84  180.05
   0   3  -3 1638.12  237.04
   0  -3   3 1386.46  203.48
   0   3   3 1396.21  204.71
   0   3   3 1322.44  199.47
   4  -3   1  364.47   54.24
   4   3   1  305.07   44.56
  -4   3  -1  363.29   55.34
   4   3   1  358.72   52.12
   4   3   1  362.79   53.08
   4  -3   1  321.66   48.52
  -1  -4   1   72.89   10.97
  -1   4   1   76.68   11.37
   1  -4  -1   69.84   10.24
  -1   4   1   77.01   11.47
  -1  -4   1   58.12    9.04
   1   4  -1   67.17   10.42
   6   1   1  693.35  102.35
   6   1   1  804.65  120.63
   6   1   1  720.57  111.32
   6  -1   1  675.26  101.41
   6  -1   1  752.30  114.47
   4   0   3    1.92    0.74
   4   0   3    2.32    0.79
   4   0   3    1.51    0.64
  -5   2   3  149.75   22.20
   5   2  -3  144.00   21.31
   5   2  -3  149.46   22.04
   5  -2  -3  115.59   16.90
  -1   2   4   72.02   11.76
   1  -2  -4   73.85   12.40
  -1   2   4   71.12   11.70
  -1   2   4   87.83   12.88
  -1   2   4   83.25   12.09
  -1  -2   4   87.43   12.71
  -1  -2   4   93.39   13.57
  -1   2   4   80.92   11.81
   1   2  -4   81.26   12.15
  -2   2   4 1501.62  113.68
  -2  -2   4 1896.98  274.45
   2   2  -4 1690.02  253.85
   2  -2  -4 1750.55  130.33
  -2   2   4 1890.53  132.35
  -2   2   4 1794.05  260.72
  -2   2   4 1578.90  231.27
  -2  -2   4 1982.27  137.63
   7   0  -1    0.37    0.63
   7   0  -1   -0.67    0.56
   3   3   2   85.16    6.05
   3   3   2   93.40    6.69
   3  -3   2   98.16    7.97
   3   3   2  102.95    7.95
   3  -3   2   81.53    6.67
  -2   4   0 2015.50  146.30
   2   4   0 1812.40  139.30
   2  -4   0 1802.21  138.84
  -2   4   0 1839.20  137.53
   2  -4   0 1614.52  120.97
   1  -4   1  827.50   67.88
  -1   4  -1 1018.16   73.19
   1  -4   1  878.10   70.56
   1   4   1  897.64   68.52
   6   2   0   55.93    4.31
   6   2   0   69.75    5.63
  -6   2   0   55.85    4.88
   6  -2   0   52.68    4.16
   6  -2   0   58.31    4.77
  -6   1   3  190.46   14.35
   6   1  -3  181.98   14.35
   6  -1  -3  154.82   11.33
   6   1  -3  182.42   13.90
   6  -1  -3  180.73   13.61
   3  -2   3    0.04    0.62
   3  -2   3   -0.03    0.60
   3   2   3    0.27    0.61
   3   2   3    0.14    0.39
   3   2   3    0.37    0.82
   2   0   4 4791.16  361.60
   2   0   4 5249.21  372.15
   2   0   4 4409.91  320.48
   2   0   4 4390.37  316.15
  -2   4   1    1.72    0.76
  -2  -4   1    0.70    0.62
  -2   4   1    0.49    0.59
  -2  -4   1    1.10    0.69
   2  -4  -1    0.83    0.50
   2   4  -1    0.70    0.56
   6  -2  -2 1349.41  102.13
   6  -2  -2 1288.46   95.26
  -6   2   2 1252.56  106.32
   6   2  -2 1327.42   98.10
   6   2  -2 1156.17   83.85
   3   3  -3  130.87    9.39
  -3  -3   3  122.22   10.53
  -3   3   3  121.14    9.07
  -3  -3   3  118.08    8.90
  -3   3   3  124.24    9.35
  -3   3   3  130.54    9.64
   3   3  -3  121.43   10.06
   5   3  -1  520.44   40.31
   5  -3  -1  469.52   34.90
   5  -3  -1  486.89   37.31
   5   3  -1  434.24   31.87
  -5   3   1  553.74   42.61
   5   3  -1  432.28   30.91
   0   2  -4   13.66    1.41
   0  -2   4   13.26    1.22
   0  -2   4   11.98    1.10
   0   2   4   11.26    1.47
   0   2   4    9.77    1.10
   0   2   4   10.01    1.28
   0   2   4   11.24    1.10
   1   3   3 1672.69  117.03
   1  -3   3 1451.41  125.21
   1   3   3 1415.62  102.19
  -1   3  -3 1712.96  121.62
   1  -3   3 1317.30   94.15
   1   3   3 1255.28  144.17
   4  -1   3  117.28    8.93
   4   1   3  115.31    9.00
   4  -1   3  131.67   10.15
   4   1   3  123.19   10.73
   4   1   3  107.68    8.11
   4  -1   3  123.00    9.76
   5   0  -4 8608.32  660.33
   5   0  -4 8780.26  562.08
   7   0  -2  289.19   22.15
   7   0  -2  342.07   27.47
   3   2  -4 1525.24  112.60
  -3  -2   4 1526.05  114.07
  -3  -2   4 1573.73  119.39
   3  -2  -4 1009.66  119.97
  -3   2   4 1415.30  105.49
  -3   2   4 1430.58  108.67
   3   2  -4 1588.85  119.13
   5   3   0  413.75   29.99
   5   3   0  351.85   26.39
  -5   3   0  435.40   35.58
   5   3   0  438.66   34.78
   5  -3   0  465.40   35.78
   5  -3   0  402.42   32.45
   7   0   0 4573.25  416.83
   7   0   0 4915.71  384.43
   7   0   0 4817.17  362.63
  -7   0   0 4406.56  359.21
   7   1  -1  662.96   48.52
   7  -1  -1  788.71   61.20
   7  -1  -1  728.61   56.09
  -7   1   1  782.38   60.39
   7   1  -1  802.62   63.42
   2  -1   4  539.09   42.52
   2   1   4  537.55   37.91
   2  -1   4  610.44   49.71
   2   1   4  520.66   38.76
   2   1   4  522.19   36.92
   2  -1   4  584.30   47.09
   2   1   4  570.07   46.31
   2  -4   1   93.22    7.79
   2   4   1   74.84    7.77
  -2   4  -1   99.32    7.03
   2  -4   1  106.21    8.20
   5  -1  -4  876.44   61.80
   5  -1  -4  726.10   85.79
   5   1  -4  887.62   71.04
  -5   1   4 1055.36   80.13
   5   1  -4 1106.93   79.63
   7   1  -2  152.20   11.69
   7  -1  -2  126.15   10.72
   7  -1  -2  131.22   11.46
  -7   1   2  163.36   12.68
   5   3  -2  110.05    7.75
   5   3  -2  144.78   10.76
  -5   3   2  135.59   10.43
  -5   3   2  142.19   10.43
   5  -3  -2  113.18    8.31
  -1  -4   2 1764.29  173.14
  -1   4   2 2589.17  184.17
  -1   4   2 2178.45  155.49
  -1  -4   2 2006.65  152.74
  -1   4   2 2167.97  169.16
   3   4   0   66.94    7.68
  -3   4   0  106.08    8.01
   3   4   0   98.04    7.36
  -3   4   0  109.82    7.97
   3  -4   0   94.56    7.26
   3  -4   0  100.03    8.03
   7  -1   0 1447.66  115.47
   7   1   0 1553.11  124.34
  -7   1   0 1395.48  105.72
   3  -4  -1  125.83    9.39
  -3   4   1  160.84   12.23
  -3   4   1  141.93   10.50
   3   4  -1  140.91   11.39
   1   2   4  106.11    7.65
   1   2   4  137.54   10.80
   1   2   4  119.97   10.63
   1  -2   4  129.97    9.15
   1  -2   4  129.21    9.08
   0   4   2  381.89   28.37
   0   4  -2  463.17   32.61
   0  -4   2  408.60   31.71
   0   4   2  462.78   34.07
   0  -4   2  342.66   45.19
   0   4   2  478.00   36.60
   5   2   2   56.85    4.75
   5   2   2   48.38    3.82
   5  -2   2   49.67    4.00
   5   2   2   42.79    3.37
   4   3  -3  223.71   16.04
  -4   3   3  218.84   16.72
   4   3  -3  218.70   16.52
  -4  -3   3  233.09   16.85
  -4   3   3  219.36   16.65
   4  -2  -4  208.49   49.65
   4   2  -4  367.91   27.25
  -4   2   4  321.85   28.45
   4   2  -4  377.82   30.99
  -4  -2   4  358.08   30.42
  -4   2   4  346.49   27.56
  -2   4   2   50.10    3.85
  -2   4   2   38.38    3.92
  -2  -4   2   48.85    4.33
  -2  -4   2   47.39    4.33
   2   4  -2   54.01    4.28
   2  -3   3    5.80    0.81
   2   3   3    4.31    0.97
  -2   3  -3    7.08    0.91
   2   3   3    6.21    0.87
  -6   2  -1   39.23    3.03
   6  -2   1   36.00    3.08
   6   2   1   34.56    2.99
   6   2   1   35.20    2.72
   6   2   1   32.86    3.07
   6   0   2   44.61    3.58
   6   0   2   35.39    3.63
   1  -4   2  130.13   10.35
   1   4   2  142.37   11.70
   1   4   2  148.46   11.45
   5  -3   1   34.45    3.01
  -5   3  -1   36.17    2.89
   5   3   1   36.02    2.76
   5   3   1   44.70    3.50
   3   0   4 2274.27  164.26
   3   0   4 2472.33  177.85
   3   0   4 2322.68  196.51
   4  -3   2   63.40    5.15
   4   3   2   58.61    4.30
   4   3   2   67.33    5.43
   4   3   2   56.33    4.08
   6   2  -3  445.05   37.49
   6   2  -3  489.96   37.27
   6  -2  -3  401.51   29.64
  -6   2   3  462.54   37.71
   6  -2  -3  416.79   29.86
   7   0  -3    0.37    0.69
   2   0  -5   -0.19    0.53
  -2   0   5    0.17    0.48
  -2   0   5   -0.05    0.46
  -2   0   5   -0.03    0.54
  -1   0   5    0.12    0.47
  -1   0   5    0.65    0.50
  -1   0   5    0.35    0.59
   3  -4   1  190.08   14.60
   3   4   1  126.35   14.60
   3  -4   1  171.52   13.95
   3   4   1  179.69   12.92
  -3   4  -1  204.64   16.43
   4   2   3  320.73   23.02
   4   2   3  358.05   32.60
   4   2   3  341.10   24.62
   4  -2   3  348.41   28.23
   7   0   1   -0.12    0.62
   7   0   1    0.01    0.64
   6   0  -4 1900.58  141.50
   6   1   2    2.49    0.75
   6  -1   2    3.08    0.67
   6   1   2    2.94    0.64
   6  -1   2    4.21    0.80
   5   0   3    0.25    0.68
   5   0   3   -0.07    0.65
  -3   4   2  616.90   54.14
   3   4  -2  568.80   61.18
  -3  -4   2  729.08   60.72
  -3   4   2  695.77   53.40
  -3   0   5    0.48    0.64
   3   0  -5   -0.26    0.55
  -7   2   1   56.78    5.82
   7   2  -1   55.37    4.47
   7  -2  -1   54.68    4.60
   3   1   4  169.34   12.10
   3  -1   4  181.14   15.62
   3   1   4  185.47   13.22
   3  -1   4  182.39   14.53
   3   1   4  146.38   11.85
   2  -2   4   11.26    1.31
   2   2   4    7.89    1.12
   2   2   4   16.76    1.42
   7  -1  -3  574.27   43.72
   7  -1  -3  494.04   36.18
  -7   1   3  609.42   47.96
   7   1  -3  478.03   43.30
  -2  -1   5  471.89   33.24
   2   1  -5  486.77   34.46
  -2   1   5  463.63   32.44
  -2   1   5  472.71   34.24
  -2  -1   5  516.84   36.14
  -2  -1   5  454.50   31.96
   6  -3  -1  683.19   50.68
   6   3  -1  640.80   48.85
   6   3  -1  751.46   57.82
   6  -3  -1  701.82   52.92
  -6   3   1  520.78   73.15
  -4   4   1  148.28   12.18
   4   4  -1  153.94   10.89
   4   4  -1  194.74   14.85
   4  -4  -1  156.22   11.54
   4  -4  -1  163.81   11.90
   0   0   5    0.32    0.49
   0   0   5   -0.75    0.91
   0   0   5   -0.10    0.49
   0   0   5   -0.05    0.41
   0   0   5    0.27    0.48
  -1  -1   5   63.87    4.62
  -1   1   5   54.95    4.61
  -1   1   5   41.06    6.01
  -1  -1   5   67.93    4.83
  -1  -1   5   61.27    4.51
   4  -4   0   23.05    1.90
   4   4   0   24.31    1.95
  -4   4   0   23.57    2.10
   4   4   0   19.41    1.57
   4  -4   0   24.59    2.06
   2   4   2   20.94    1.86
   2  -4   2   22.84    2.08
  -5   2   4  140.36   11.17
   5   2  -4  154.13   12.25
  -5   2   4  152.25   12.32
   7   1   1    5.79    1.03
   7  -1   1    6.48    0.99
   7   1   1    9.00    1.07
   6   1  -4  442.31   34.87
  -6   1   4  409.90   36.73
   6  -1  -4  429.76   31.50
   7  -2  -2   66.51    5.08
  -7   2   2   61.07    5.33
   7   2  -2   62.41    5.11
   7  -2  -2   60.29    4.57
   5   1   3  298.61   25.02
   5  -1   3  270.39   20.65
   5   1   3  291.15   22.07
   5  -1   3  238.87   22.75
   5   1   3  265.44   19.56
   5  -3  -3   -0.21    0.84
   5   3  -3    3.17    0.69
  -5   3   3    4.24    0.76
  -5   3   3    3.72    0.86
  -3  -1   5  788.91   54.91
  -3  -1   5  660.08   46.65
  -3   1   5  809.88   57.49
  -3   1   5  696.95   56.20
   3   1  -5  779.88   54.93
  -1   3   4 1493.65  106.40
   1   3  -4 1808.70  125.40
  -1   3   4 1557.13  138.80
  -1   3   4 1271.04   98.88
  -1   3   4 1580.65  121.75
  -1  -3   4 1439.41  109.38
  -2   3   4   84.28    3.34
  -2   3   4   87.34    4.32
  -2   3   4   66.48    8.53
   2  -3  -4   64.45    9.66
  -2  -3   4   92.88    3.91
   2   3  -4  103.66    3.51
  -2   3   4   93.31    6.71
   7  -2   0  284.44   22.98
  -7   2   0  300.00   22.09
   7   2   0  301.56   24.28
   6   3   0   72.41    3.46
  -6   3   0   68.53    3.71
   6  -3   0   76.41    4.00
   4   0  -5    0.25    0.55
   3  -3   3   17.41    2.08
   3   3   3   24.93    1.88
  -8   0   1    0.35    0.65
   8   0  -1    0.29    0.62
   6   3  -2   61.38    3.94
   6  -3  -2   60.09    2.35
   6  -3  -2   61.05    2.69
  -6   3   2   60.38    2.38
  -6   3   2   70.89    3.83
   0  -1   5  180.98    5.65
   0   1   5  173.11    6.52
   0  -1   5  168.67    5.16
   0   1   5  148.75    6.72
   0   1   5  148.84    4.75
   0   3   4    1.75    0.50
   0   3   4    2.69    0.82
   0   3  -4    2.23    0.86
   0   3   4    2.12    0.73
   0  -3   4    1.99    0.67
  -3   3   4 1576.24   59.20
  -3   3   4 1602.30   64.29
   3   3  -4 1492.70   75.49
  -3  -3   4 1626.20   67.98
   3   3  -4 1676.15   52.94
   8   0  -2  219.11   10.58
  -4   4   2 1802.96  103.19
   4   4  -2 1759.61   84.52
  -4   4   2 1738.09   89.16
  -1   4   3  595.94   24.15
  -1   4   3  623.26   23.19
  -1   4   3  442.09   63.92
  -1  -4   3  622.36   33.98
   1   0   5    1.60    0.53
   1   0   5    1.66    0.76
   1   0   5    1.77    0.55
   1   0   5    1.14    0.51
   4   1  -5  889.54   30.07
  -4   1   5  880.75   30.91
  -4   1   5  832.01   29.78
  -2   4   3  248.33    8.43
   2   4  -3  244.18   12.13
  -2   4   3  238.93   10.39
  -2  -4   3  251.52   13.17
  -2   4   3  205.16   19.06
   8   1  -1   10.34    0.96
  -8   1   1   10.89    0.91
   8  -1  -1    9.06    1.04
   0   4   3   47.32    2.14
   0  -4   3   45.37    2.57
   0   4   3   45.22    1.62
   0   4   3   40.50    2.64
  -4   4  -1  113.81    4.99
   4   4   1   68.33    9.40
   4   4   1  110.95    3.93
   4   4   1   90.86    3.10
   4  -4   1  120.11    5.44
   8   0   0  484.41   63.40
  -8   0   0  639.74   26.85
   8   0   0  603.96   25.65
   6   2   2    0.25    0.77
   6  -2   2    0.03    0.65
   6   2   2    0.54    0.57
   4   0   4    4.54    0.95
   4   0   4    4.82    0.71
  -8   1   2  209.84   11.96
   8  -1  -2  207.00    9.93
   8   1  -2  206.96    9.84
   1  -3   4  190.80   14.89
   1   3   4  204.73   12.69
   1   3   4  210.25   11.47
  -1   3  -4  247.79    7.69
   3  -4   2  287.37   15.38
   3   4   2  271.24   15.18
   5   3   2  232.57    7.78
   5  -3   2  240.32   16.29
   5   3   2  261.27    9.54
   5   3   2  285.80   14.88
   3  -2   4    1.19    0.73
   3   2   4    1.37    0.95
   3   2   4    0.87    0.55
   1  -1   5    9.23    0.78
   1   1   5    8.84    0.95
   5   0  -5    0.12    0.57
   7  -2  -3   45.14    1.91
   7   2  -3   45.25    2.27
  -7   2   3   47.12    2.69
   7  -2  -3   39.60    1.73
   2   2  -5  179.46    6.39
  -2   2   5  177.38    6.89
  -2  -2   5  171.40    5.44
  -2   2   5  154.59    5.11
  -2  -2   5  184.17    6.38
  -2   2   5  172.53    6.22
   4   3  -4   27.98    2.05
  -4  -3   4   28.19    2.01
  -4   3   4   32.57    1.71
  -4   3   4   32.93    1.71
   4   3  -4   35.05    1.60
  -3   4   3    1.75    0.70
  -3   4   3    2.61    0.60
  -3  -4   3    2.99    0.88
   3   4  -3    2.98    0.81
  -3   4   3    3.36    0.66
  -5   4   1    7.49    0.96
   5   4  -1    6.53    0.52
   5   4  -1    9.28    0.77
   5  -4  -1    7.70    0.71
   5  -4  -1    7.44    0.68
   0   5   0    3.60    0.57
   0  -5   0    2.74    0.59
   0  -5   0    3.14    0.63
   0   5   0    0.46    0.55
   0   5   0    0.37    0.54
  -1   2   5  201.57    8.48
  -1   2   5  210.93    9.26
  -1  -2   5  209.31    8.07
  -6   3  -1  213.24    8.66
   6   3   1  238.21   13.68
   6   3   1  226.06    9.10
   6  -3   1  208.96   11.20
   7   0  -4    7.52    0.74
   1  -4   3   68.11    3.48
   1   4   3   87.62    3.72
   1   4   3   90.35    4.45
   8   1   0   40.42    1.97
   8  -1   0   41.67    2.80
  -8   1   0   40.37    1.92
   8   1   0   39.90    2.16
   7  -2   1    9.94    1.11
   7   2   1   14.72    0.99
   7   2   1   10.11    1.65
  -7   2  -1   13.98    0.84
  -6   2   4   48.97    2.23
  -6   2   4   52.08    2.39
   6   2  -4   44.42    2.50
   5  -2   3  259.21   20.80
   5   2   3  266.37   30.74
   5   2   3  308.75   11.22
   5   2   3  286.00    9.70
   4  -1   4   45.45    2.47
   4   1   4   36.17    1.47
   4   1   4   35.75    4.01
   4  -1   4   43.31    1.96
   4   1   4   40.26    1.70
  -3   2   5    0.77    0.57
  -3  -2   5    0.14    0.63
   3   2  -5    0.25    0.67
  -3   2   5    0.07    0.60
   1   5   0  792.06   27.26
  -1   5   0  831.83   28.99
   1  -5   0  752.93   32.61
   1  -5   0  747.34   25.97
  -1   5   0  827.86   28.31
   5  -4   0  129.02    5.50
  -5   4   0  131.21    6.28
   5   4   0  125.55    4.84
   8   0  -3    0.14    0.70
   7   0   2   58.01    3.66
   7   0   2   56.31    2.77
  -6   3   3   28.36    2.18
   6   3  -3   30.39    1.93
  -6   3   3   33.19    1.67
   5   1  -5  241.95    8.92
  -5   1   5  237.42    9.41
  -5   1   5  198.31    8.76
   0   5  -1  553.43   17.59
   0   5   1  507.50   18.14
   0   5   1  559.95   22.74
   0  -5   1  559.69   24.01
   0   5  -1  569.24   21.12
   0   2   5   -0.26    0.60
   0   2   5   -0.23    0.74
   0   2   5   -0.04    0.62
   0  -2   5    0.28    0.64
  -1   5   1  182.09    7.32
   1   5  -1  200.67    7.31
  -1  -5   1  191.08    8.34
   7   1  -4  438.70   18.15
   7  -1  -4  380.32   14.30
  -7   1   4  382.66   26.90
   4   3   3  749.94   34.88
   4  -3   3  702.82   39.04
   2   0   5    0.71    0.56
   2   0   5    0.70    0.81
   6   0   3   -0.03    0.62
   6   0   3   -0.02    0.80
   5   4  -2  159.48    6.72
  -5   4   2  142.40    8.46
  -5   4   2  161.01    5.40
  -7   3   1   77.05    3.47
   7  -3  -1   73.61    3.11
   7   3  -1   66.42    3.74
   2  -5   0  242.08    9.45
  -2   5   0  238.12    9.61
   2  -5   0  245.89    9.76
   2   5   0  272.23    9.18
   1  -5   1  466.24   20.27
   1   5   1  452.37   17.47
   1   5   1  460.22   23.40
  -1   5  -1  493.78   17.41
   8   1  -3    1.92    0.74
   8  -1  -3    0.46    0.68
  -8   1   3    1.03    0.76
  -4  -2   5   45.58    2.01
  -4   2   5   43.95    1.88
  -4   2   5   43.36    2.31
   4   2  -5   43.23    2.00
   7  -1   2  470.03   30.69
   7   1   2  520.94   24.13
   7   1   2  442.43   26.99
   2   3   4   58.27    4.38
   2   3   4   80.42    3.74
   2  -3   4   64.78    4.69
  -4   4   3    8.47    0.79
   4   4  -3    7.25    0.90
  -4   4   3    8.91    0.86
   8   2  -1   25.62    1.59
   8  -2  -1   25.11    1.42
  -8   2   1   24.35    1.46
  -2   5   1   54.51    3.18
  -2   5   1   60.25    2.57
   2   5  -1   70.13    2.77
   2  -4   3  326.38   16.97
   2   4   3  330.61   13.97
   2   4   3  313.02   18.72
   8   0   1   -0.17    0.61
   8   0   1    0.38    0.69
   2  -1   5  134.26    4.89
   2   1   5  129.36    5.67
   5   3  -4   66.11    3.18
  -5   3   4   61.86    3.01
  -5   3   4   58.82    2.90
   6   1   3   45.48    2.08
   6  -1   3   42.72    2.03
   6  -1   3   49.12    2.77
   6   1   3   43.60    2.46
   7   3  -2  392.54   17.71
  -7   3   2  430.07   17.17
  -7   3   2  379.13   13.54
   7  -3  -2  369.00   13.93
  -8   2   2   12.27    1.29
   8   2  -2   14.58    0.98
   8  -2  -2   14.97    1.06
  -7   3   0   42.89    2.07
   7  -3   0   45.56    2.31
   7   3   0   43.62    2.10
   6   0  -5   -0.13    0.58
  -5   4  -1  240.29   10.06
   5  -4   1  235.05   10.98
   5   4   1  190.77   13.95
   5   4   1  218.18    7.97
   4  -4   2    0.58    0.70
   4   4   2    0.59    0.90
   1  -2   5   25.87    1.45
   1   2   5   23.08    1.06
   1   2   5   23.12    1.52
   2  -5   1    1.86    0.70
   2   5   1    1.43    0.68
   8   2   0    0.38    0.72
   8  -2   0    0.62    0.71
  -8   2   0    0.37    0.63
   8   1   1  449.18   18.68
   8   1   1  460.65   22.33
   8  -1   1  479.91   22.18
   4   2   4  369.82   13.41
   4   2   4  388.27   22.85
   4  -2   4  407.36   19.01
  -1  -5   2  368.70   20.47
   1   5  -2  380.54   16.41
   1   5  -2  398.74   13.09
  -1   5   2  401.19   20.57
   3   5   0  202.27    6.91
   3  -5   0  190.74    7.75
  -3   5   0  209.19    6.96
  -3   5   1 1329.22   77.27
   3   5  -1 1266.33   53.60
   0  -5   2    2.16    0.76
   0   5   2    2.69    0.67
   0   5   2    2.08    0.71
   6   1  -5    5.35    0.72
  -6   1   5    6.10    0.79
   5   2  -5  105.52    4.50
  -5   2   5  102.01    3.84
  -5   2   5  112.00    4.35
   5   0   4    0.68    0.71
   5   0   4    3.42    0.86
   6  -4  -1    4.27    0.69
  -6   4   1    4.71    0.85
   6   4  -1    4.19    0.81
   2   5  -2  341.15   15.68
  -2   5   2  370.35   14.42
  -2  -5   2  303.12   19.04
  -2   5   2  306.52   17.19
  -9   0   1   -0.08    0.65
   9   0  -1    0.31    0.66
  -7   2   4  152.76    7.11
   7   2  -4  163.02    6.90
  -7   2   4  165.64    7.77
  -9   0   2  114.59    6.77
   9   0  -2  123.85    6.09
   6  -3   2  233.22   12.11
   6   3   2  226.69    8.63
   6   3   2  244.35   14.20
   3   0   5    0.19    0.63
   3   0   5   -0.21    0.88
   5   4  -3    3.43    0.76
  -5   4   3    3.87    0.62
  -5   4   3    3.60    0.92
  -1   4   4  327.45   11.27
  -1  -4   4  327.18   13.53
  -1   4   4  297.19   10.98
  -1   4   4  311.12   17.50
   1   5   2    9.27    0.83
   1   5   2    9.40    0.92
   1  -5   2    9.50    0.98
  -2   4   4   47.86    4.26
  -2  -4   4   60.35    3.33
   2   4  -4   60.23    2.98
  -2   4   4   59.09    2.26
  -2   4   4   59.55    2.45
  -6   4   0  135.24    8.35
   6  -4   0  109.36    7.76
   6   4   0  128.21    5.12
  -8   2   3   20.74    1.60
   8   2  -3   18.35    1.46
   8  -2  -3   17.79    1.29
   3   3   4  105.48    5.90
   3   3   4  106.71    7.54
   3  -3   4  112.97    7.57
   8   0  -4  228.18   13.86
   7  -2   2  676.88   48.60
   7   2   2  636.60   38.61
   7   2   2  684.74   44.93
   3  -4   3   -0.05    0.75
   3   4   3   -0.14    0.64
   3   4   3    0.38    0.87
   7   3  -3    2.27    0.82
  -7   3   3    2.39    0.84
  -7   3   3    2.30    0.61
   5  -1   4  300.26   23.00
   5   1   4  315.58   17.93
   5   1   4  349.77   21.76
   5  -1   4  311.52   21.04
  -2   3   5  872.39   48.15
  -2  -3   5 1058.56   57.91
  -2   3   5  928.06   62.76
  -2   3   5  989.58   55.24
   2   3  -5  981.93   58.96
  -6   4   2   56.32    3.63
   6   4  -2   52.23    3.58
  -2   0   6    2.40    0.66
   9   1  -1  114.05    9.31
  -9   1   1   94.82    9.98
   9  -1  -1  126.27    8.51
  -1   3   5  143.21    8.23
  -1   3   5  147.09    8.69
  -1  -3   5  147.08    8.42
   0   4   4    1.81    0.70
   0   4   4    0.92    0.71
   0  -4   4    0.68    0.78
   3   5   1   23.11    1.75
   3  -5   1   20.51    1.77
   2   2   5   24.49    1.54
   2   2   5   29.28    2.13
   2  -2   5   26.41    2.15
  -7   3  -1  373.21   20.78
   7  -3   1  328.46   27.06
   7   3   1  354.71   25.73
   7   3   1  328.31   19.72
   9  -1  -2  620.75   40.24
   9   1  -2  466.85   42.29
  -9   1   2  627.07   42.38
  -3   0   6  141.25    7.76
  -3   0   6  163.49    8.83
  -6   3   4   43.57    2.71
  -6   3   4   40.03    2.69
   6   3  -4   43.52    2.78
   6  -2   3 1757.35  119.83
   6   2   3 1463.98  154.14
   6   2   3 1630.80   99.30
  -3   4   4  231.76   13.00
  -3   4   4  229.65   13.56
   3   4  -4  223.02   14.43
  -3  -4   4  223.95   14.07
   5  -3   3  369.94   23.39
   5   3   3  409.93   27.61
  -3   5   2  105.45    7.34
   3   5  -2  116.85    6.93
  -3   5   2  117.20    6.50
   3   1   5    6.94    1.15
   3  -1   5    5.91    0.88
  -3   3   5  103.80    5.82
  -3   3   5  124.40    7.06
   3   3  -5  118.93    7.03
  -3  -3   5  125.28    7.16
  -1   0   6  397.93   22.08
   9   0   0  134.06    8.95
   8   1  -4    1.85    0.75
   8  -1  -4    0.93    0.61
  -8   1   4    1.23    0.85
  -4   5   1   48.30    3.23
   4   5  -1   45.89    2.84
   2   1  -6   24.42    1.57
  -2   1   6   26.00    1.67
  -2  -1   6   25.32    1.57
  -2  -1   6   24.84    1.52
   0  -3   5    0.58    0.82
   0   3   5    0.67    1.12
   0   3   5    0.59    1.06
   4  -5   0    5.69    0.75
  -4   5   0    7.37    0.95
   4   5   0    6.69    0.74
   2   5   2   45.31    3.15
   2  -5   2   57.69    3.90
   2   5   2   56.48    3.96
   8   2   1 1481.15   90.62
   8   2   1 1465.27   95.02
   8  -2   1 1470.86   91.56
   7   0  -5    0.16    0.65
  -9   0   3   -0.10    0.99
   9   0  -3   -0.02    0.85
   3   1  -6   76.60    4.21
  -3   1   6   77.82    4.38
  -3  -1   6   78.84    4.30
  -4   0   6    7.15    0.82
  -4   0   6    6.88    0.78
  -1  -1   6  385.72   20.36
   1   1  -6  427.04   22.49
  -1  -1   6  416.74   21.82
  -1   1   6  399.40   21.52
   9  -1   0  171.97   11.69
   9   1   0  153.23    9.12
   9   1   0  171.78   11.01
   1   4   4   44.92    2.89
   1   4   4   35.99    3.78
   1  -4   4   48.17    2.98
  -6   2   5   51.57    3.19
  -6   2   5   49.14    3.00
   6   2  -5   51.46    3.03
   5  -4   2   88.65    5.71
   5   4   2   74.97    5.87
   4   3  -5   13.10    1.27
  -4  -3   5   12.62    1.34
  -4   3   5   16.37    1.33
  -4   3   5   15.05    1.21
   4   4  -4  157.04   10.74
  -4   4   4  175.94   10.17
  -4   4   4  173.99   10.27
  -4  -4   4  143.53    9.32
   8  -3  -1   19.98    1.81
  -8   3   1   21.88    1.67
   8   3  -1   23.38    1.72
   8   0   2   32.74    2.10
   8   0   2   37.98    2.76
   7   0   3   -0.54    0.78
   7   0   3   -0.16    0.72
  -6   4  -1  349.01   19.51
   6  -4   1  351.36   21.95
   6   4   1  383.43   24.45
   6   4   1  318.04   17.89
  -7   1   5    6.11    0.93
   7   1  -5    5.14    0.81
   9   1  -3  109.24    8.67
   9  -1  -3  124.05    7.43
  -9   1   3  112.96    8.14
  -4   1   6   11.24    0.96
   4   1  -6   11.00    0.97
  -4   1   6   12.02    0.98
  -4  -1   6   10.11    0.95
   8  -3  -2  118.08    6.89
  -8   3   2  137.39    8.74
   8   3  -2  110.10    7.86
   4   5  -2  827.30   48.05
  -4   5   2  849.13   51.77
  -1   5   3    3.12    0.75
  -1  -5   3    2.71    0.79
   1   5  -3    1.94    0.77
   0  -1   6    9.32    0.85
   0   1   6   10.27    1.14
   1  -3   5   24.98    2.04
   1   3   5   24.92    1.71
   1   3   5   22.97    1.87
  -6   4   3   14.90    1.29
   6   4  -3   15.14    1.34
  -6   4   3   13.65    1.04
   5   2   4 1520.11   92.48
   5  -2   4 1436.04   89.57
  -2  -5   3  212.10   13.14
   2   5  -3  215.15   13.14
  -2   5   3  200.62   12.73
  -2   5   3  197.98   11.13
   8  -1   2  178.00   13.58
   8   1   2  190.90   11.92
   8   1   2  139.63   14.70
   0  -5   3   63.27    4.51
   0   5   3   57.30    3.55
   0   5   3   67.42    4.06
   7   1   3  133.42    8.08
   7   1   3  136.76    8.44
   7  -1   3  125.26    9.52
   4   5   1   16.58    1.44
   4  -5   1   17.77    1.41
   9   2  -1    0.33    0.76
   9  -2  -1    0.11    0.77
  -9   2   1    0.27    0.69
  -5   0   6  101.66    5.68
  -5   0   6   96.25    5.96
  -8   3   0   21.82    1.57
   8   3   0   24.75    1.69
   8  -3   0   25.21    1.80
   4   4   3 1038.19   58.47
   4  -4   3 1004.73   61.02
   4   4   3 1011.95   65.33
  -9   2   2  112.16    6.81
   9   2  -2  107.57    6.71
   9  -2  -2   99.64    6.40
   4   0   5    0.18    0.60
   4   0   5   -0.64    0.96
   4  -3   4 1181.64   79.55
   4   3   4 1055.72   64.36
   4   3   4 1226.51   78.09
   3   2   5  717.24   46.67
   3  -2   5  826.78   46.08
  -7   4   1   45.10    2.90
   7   4  -1   43.33    2.73
   7  -4  -1   33.61    2.30
   3   5   2   71.84    4.88
   3  -5   2   86.98    5.52
   3   5   2   73.58    4.77
  -8   2   4  297.43   19.48
   8   2  -4  275.30   17.04
   2   4   4   94.77    6.23
   2  -4   4   88.75    5.94
   2   4   4   87.88    5.35
  -5   3   5   49.07    3.38
  -5   3   5   49.82    3.06
   5   3  -5   48.51    3.34
   9   0   1    0.90    0.81
  -3   5   3  482.30   27.67
  -3  -5   3  438.47   25.54
  -3   5   3  509.84   27.46
   3   5  -3  463.23   27.72
  -2   2   6   24.03    1.62
  -2  -2   6   25.22    1.63
   2   2  -6   23.89    1.60
   5   5  -1   25.15    1.68
  -5   5   1   25.98    1.78
   6   0   4   71.93    4.90
   6   0   4   72.71    4.90
  -7   3   4    4.34    0.81
   7   3  -4    3.90    0.93
  -7   3   4    3.46    0.90
  -5   1   6  389.22   21.68
  -5   1   6  439.74   23.99
  -5  -1   6  387.33   21.20
   5   1  -6  388.40   21.42
   1   5   3   57.32    3.47
   1   5   3   51.05    5.28
   1  -5   3   60.92    3.80
  -5   4   4  106.60    6.91
   5   4  -4  101.01    7.12
  -5   4   4  118.81    7.09
  -3  -2   6   26.00    1.69
  -3   2   6   22.09    1.75
  -3  -2   6   23.65    1.46
   3   2  -6   24.94    1.72
   7   4  -2    2.20    0.79
  -7   4   2    2.14    0.88
   4   1   5  393.19   30.47
   4  -1   5  380.54   25.39
  -1  -2   6    7.05    0.89
   1   2  -6    7.88    0.90
  -1   2   6    8.65    1.06
  -1   2   6    6.78    0.89
  -1   2   6    7.22    1.00
   5   5   0    1.38    0.57
  -5   5   0    1.42    0.80
   5  -5   0    1.40    0.64
   5   5   0    1.79    0.98
   7   4   0  230.60   26.06
  -7   4   0  236.12   14.29
   7  -4   0  246.24   14.99
   7   4   0  239.33   13.84
   9  -2   0   17.60    1.46
  -9   2   0   16.00    1.18
   9   2   0   19.20    1.49
   9   2   0   18.68    1.62
   1   1   6  214.02   14.69
   1   1   6  211.09   11.52
   1   1   6  230.49   15.92
   1  -1   6  224.89   11.93
  -8   3   3  290.63   17.55
  -8   3   3  264.24   14.69
  -8   3   3  245.72   20.72
   8   3  -3  248.53   19.86
  -8   3   3  278.76   17.02
   8   3  -3  236.56   17.02
   7  -3   2  243.03   16.16
   7   3   2  241.49   16.10
   7  -3   2  240.29   19.54
   7   3   2  218.83   12.57
   9   1   1  136.35    8.06
   9   1   1  129.82    9.89
   9   1   1  124.06   12.04
   9  -1   1  124.85   11.85
   9  -1   1  119.35    9.49
  -9   0   4   49.50    3.57
   9   0  -4   46.02    2.99
  -9   0   4   42.12    3.24
  -9   0   4   45.55    3.29
   6   1   4    0.54    1.13
   6   1   4   -0.27    0.91
   6  -1   4   -0.35    0.69
   6   1   4   -0.51    0.94
   6   1   4   -0.46    0.65
   6  -1   4   -0.36    0.69
   6  -1   4   -0.62    0.83
   7   2  -5    7.24    0.95
  -7   2   5    8.91    1.00
  -7   2   5    7.99    1.01
  -7   2   5    6.59    1.02
  -7  -2   5    8.95    1.24
  -7   2   5   10.04    1.20
  -7   2   5    7.28    1.02
  -7  -2   5    7.37    1.05
   7   2  -5    8.46    1.00
   2   3   5  624.64   37.63
   2   3   5  663.69   39.93
   2  -3   5  620.18   33.92
   2   3   5  556.34   32.86
   2   3   5  658.11   40.41
   2   3   5  613.66   33.63
   2   3   5  589.91   32.85
   2   3   5  621.57   33.96
   2  -3   5  617.41   41.70
   2  -3   5  577.89   39.30
  -9  -2   3  158.44   11.99
  -9   2   3  172.73   10.95
   9   2  -3  150.02   10.05
   9  -2  -3  132.35    7.67
   9   2  -3  148.46    9.79
  -9   2   3  156.05   10.29
  -9   2   3  162.57    9.81
   6  -3   3   74.23    4.99
   6   3   3   88.01    6.02
   6   3   3   80.44    5.52
   6   3   3   68.85    5.80
   6  -3   3   79.11    5.01
  -4  -2   6   32.24    2.05
  -4   2   6   36.31    2.29
  -4   2   6   34.12    2.45
  -4   2   6   30.66    2.55
  -4   2   6   32.72    2.21
  -4   2   6   34.77    2.51
   4   2  -6   36.77    2.47
  -4   2   6   34.34    2.25
  -4   2   6   28.77    2.01
  -5   5   2   10.19    1.14
  -5   5   2   12.17    1.25
  -5   5   2   11.77    1.16
   5   5  -2   12.06    1.09
  -5   5   2   11.32    1.21
   5   5  -2   11.00    1.11
   5   5  -2   10.62    1.27
  -8   0   5    0.11    0.89
  -8   0   5    0.36    0.83
  -8   0   5   -0.29    0.90
  -8   0   5   -0.18    0.90
   8   0  -5    0.32    0.69
  -6   0   6   76.82    5.50
  -6   0   6   59.95    4.26
  -6   0   6   70.92    4.48
  -6   0   6   74.31    5.13
  -6   0   6   62.00    4.35
  -6   0   6   71.95    4.59
   0   2   6   45.00    2.92
   0   2   6   44.53    2.99
   0   2   6   48.64    3.95
   0  -2   6   47.87    2.91
   0  -2   6   42.83    2.71
   0   2   6   53.49    3.45
   0   2   6   51.82    3.18
  -4   5   3  182.10   11.74
  -4   5   3  180.11   11.81
  -4   5   3  197.59   12.42
  -4   5   3  201.80   12.69
   4   5  -3  189.43   11.42
  -4   5   3  203.59   12.50
  -4   5   3  187.09   13.21
  -4   5   3  198.31   12.83
  -4  -5   3  191.48   11.56
  10   0  -2  378.33   24.47
 -10   0   2  438.94   27.46
 -10   0   2  392.59   28.25
 -10   0   2  365.79   25.09
  10   0  -2  419.98   27.56
   8  -2   2 1783.04  133.28
   8   2   2 1755.57  117.13
   8   2   2 1707.86  111.26
   8   2   2 1533.07  119.45
   8  -2   2 1825.45  128.36
   8   2   2 1844.03  110.28
  10   0  -1   -0.18    0.73
  10   0  -1   -0.69    0.76
 -10   0   1   -0.17    0.65
   7  -2   3  859.82   57.97
   7   2   3  821.15   53.99
   7   2   3  781.57   52.88
   7  -2   3  880.28   58.43
   7   2   3  775.68   46.09
   7  -2   3  792.35   51.66
   9   1  -4   12.27    1.19
  -9   1   4   13.12    1.27
   9  -1  -4   10.36    1.01
  -9   1   4   12.42    1.28
  -9   1   4   14.28    1.42
  -9   1   4   12.89    1.30
  -9  -1   4   11.11    1.43
   9   1  -4   11.45    1.17
  -9   1   4   11.40    1.22
   0   6   0   23.98    1.84
   0   6   0   23.48    1.94
   0   6   0   24.87    1.73
   2   5   3  290.15   18.36
   2   5   3  250.53   21.30
   2   5   3  304.98   19.92
   2   5   3  270.26   17.41
   2   5   3  309.49   19.50
   2   5   3  252.94   25.38
   2  -5   3  291.59   19.57
   2  -5   3  296.21   21.48
   2   5   3  277.82   20.01
  -2   5  -3  317.65   19.87
   2   5   3  269.08   16.79
   8  -3   1  115.96    8.36
   8   3   1  112.57    7.03
   8   3   1  111.74    7.28
   8   3   1  113.75    7.94
  -8   3  -1  112.93    7.35
   8  -3   1  122.65    8.35
   8   3   1  103.82    7.39
   8   3   1  119.28    8.01
   6   4   2 1661.13  112.27
   6   4   2 1797.31  129.86
   6   4   2 1645.80  113.10
   6  -4   2 1682.94  106.84
   6   4   2 1465.05   95.24
   6   4   2 1833.76  109.57
   6  -4   2 1669.19  112.48
   2   0   6    0.70    1.02
   2   0   6    0.59    0.66
   2   0   6    0.44    0.85
   1   6   0  814.79   51.04
  -1   6   0  719.01   51.66
  -1   6   0  820.49   50.78
   1   6   0  841.24   55.12
  -1   6   0  725.47   43.32
   1   6   0  717.61   45.97
   1   6   0  866.05   51.80
  -1   6   0  781.94   47.89
   1   6   0  790.34   49.18
   8   1  -5    9.83    1.11
  -8  -1   5    8.18    1.12
  -8   1   5    9.36    1.15
  -8   1   5   10.26    1.17
  -8  -1   5    9.24    1.33
  -8   1   5    9.61    1.16
   8   1  -5    9.73    1.09
  -8   1   5    8.93    1.10
  -8   1   5   11.11    1.19
  -8  -1   5    8.82    1.05
   6   3  -5   15.49    1.35
  -6  -3   5   15.61    1.37
  -6   3   5   18.17    1.59
   6   3  -5   15.12    1.30
  -6   3   5   17.55    1.39
  -6  -3   5   17.90    1.55
  -6   3   5   16.19    1.38
  -6   3   5   15.13    1.35
  -6   3   5   15.01    1.22
  -6  -3   5   14.32    1.26
  -6   3   5   16.80    1.46
  -6   3   5   16.68    1.43
  -6   1   6    9.95    1.13
  -6  -1   6   11.62    1.18
  -6  -1   6   12.05    1.18
  -6   1   6   14.06    1.55
  -6   1   6   12.91    1.31
  -6   1   6   12.21    1.18
  -6  -1   6   12.34    1.32
  -6   1   6   10.33    1.26
   6   1  -6   11.19    1.01
  -6   1   6   12.48    1.21
  -6   1   6   13.05    1.19
   5  -5   1   43.47    3.06
   5  -5   1   41.19    2.81
   5   5   1   48.23    3.55
  -5   5  -1   41.54    2.92
   5   5   1   48.27    3.61
  -5   5  -1   43.75    3.32
   5   5   1   43.21    3.12
   5   5   1   39.78    2.79
   5   5   1   38.40    2.95
   3   4   4  199.30   13.02
   3   4   4  178.00   12.50
   3  -4   4  180.98   13.83
   3  -4   4  180.29   13.43
   3   4   4  189.58   11.46
   3   4   4  192.41   12.29
   3   4   4  204.28   13.41
   3   4   4  185.58   11.39
   3   4   4  165.58   13.18
   4  -5   2   18.89    1.76
   4   5   2   19.36    1.65
  -4   5  -2   18.54    1.38
   4   5   2   22.64    1.78
   4   5   2   20.85    1.71
   4   5   2   21.99    1.81
   4  -5   2   19.97    1.75
  -4   5  -2   20.19    1.66
   4   5   2   21.94    2.12
  -7   4   3   54.15    3.67
  -7   4   3   49.49    3.79
  -7   4   3   53.49    3.57
   7   4  -3   53.57    3.70
  -7   4   3   46.11    2.81
  -7  -4   3   53.34    3.71
  -7   4   3   54.44    3.72
   7   4  -3   53.96    3.69
  -7   4   3   59.01    3.94
  -7   4   3   54.90    3.56
  -2   4   5   86.33    5.27
  -2   4   5   92.15    6.72
  -2   4   5   86.36    5.50
  -2   4   5   93.12    5.85
  -2   4   5   94.46    6.20
  -2   4   5   83.22    5.00
  -2   4   5   87.79    5.39
  -2   4   5   83.02    5.03
  -2   4   5   81.71    5.68
   2   4  -5   79.85    5.15
  -2  -4   5   80.91    5.02
  -2  -4   5   85.74    5.25
 -10  -1   2  233.57   14.22
  10   1  -2  216.30   14.17
 -10   1   2  187.53   15.57
 -10  -1   2  203.25   13.24
  10  -1  -2  160.02   17.91
  10  -1  -2  211.82   14.45
 -10   1   2  199.19   12.61
 -10   1   2  184.43   11.65
  10   1  -2  216.04   14.34
 -10   1   2  234.21   14.59
 -10  -1   2  236.74   15.49
  10   1  -1  410.22   27.85
  10   1  -1  319.48   19.48
 -10   1   1  430.86   28.29
  10   1  -1  396.63   26.85
 -10   1   1  363.09   22.44
 -10  -1   1  312.60   19.82
  10  -1  -1  364.05   25.02
  10  -1  -1  399.28   27.04
   0   6   1   97.86    6.23
   0   6   1   98.72    6.95
   0  -6   1   98.51    6.04
   0   6  -1  100.77    5.97
   0   6  -1   84.26    5.12
   0   6  -1   86.57    5.47
   0   6  -1   98.29    6.65
   0   6   1   85.35    5.89
   0   6   1   94.96    5.87
   0   6   1   98.01    6.78
   0   6   1   96.17    6.24
   0   6  -1   99.46    6.59
  -1   6   1 1281.56   79.64
  -1   6   1 1188.64   76.26
   1   6  -1 1201.82   69.41
  -1   6   1 1395.86   83.58
  -1   6   1 1060.71   71.47
  -1   6   1 1175.52   77.01
   1   6  -1 1256.56   73.57
   1   6  -1 1362.26   83.85
  -1   6   1 1275.34   77.17
   1   6  -1 1158.06   67.77
   1   6  -1 1182.28   72.41
  -1   4   5    7.07    1.09
  -1   4   5    6.13    0.87
  -1  -4   5    4.27    0.76
  -1  -4   5    5.27    0.91
  -1   4   5    6.25    0.81
  -1  -4   5    5.00    0.90
   1   4  -5    5.64    0.92
  -1   4   5    7.08    1.60
  -1   4   5    6.33    1.06
  -1   4   5    6.65    1.07
  -1   4   5    5.47    0.95
  -1   4   5    5.51    0.92
  -1   4   5    6.20    1.00
  -1   4   5    7.43    1.21
  -1   4   5    7.18    0.94
  -5   2   6  487.13   28.32
  -5   2   6  494.01   29.63
  -5   2   6  488.01   32.60
  -5  -2   6  441.45   26.99
   5   2  -6  528.25   31.99
   5   2  -6  498.25   29.49
  -5  -2   6  458.48   28.96
  -5  -2   6  522.77   30.95
  -5   2   6  465.51   30.29
  -5   2   6  456.89   27.04
  -5   2   6  527.67   33.20
  -5   2   6  512.33   30.91
   7   4   1  291.57   17.41
  -7   4  -1  282.54   18.62
   7   4   1  346.68   23.89
   7  -4   1  320.72   21.67
   7   4   1  343.44   22.96
  -7   4  -1  274.53   19.64
   7   4   1  352.38   24.55
   7   4   1  315.49   22.37
   7  -4   1  324.73   21.85
  -7   4  -1  343.35   20.96
   7   4   1  297.49   17.46
   7   4   1  358.05   23.43
  -6   4   4  570.29   33.88
  -6   4   4  582.50   35.08
  -6   4   4  478.06   29.95
   6   4  -4  501.77   33.62
  -6   4   4  557.45   35.80
  -6   4   4  583.67   34.70
  -6   4   4  567.05   37.65
  -6   4   4  598.76   36.51
  -6   4   4  563.40   34.55
   6   4  -4  527.51   36.88
  -6  -4   4  540.49   36.20
  -6  -4   4  541.60   33.19
   4   2   5   79.11    4.78
   4  -2   5   56.55    3.78
   4   2   5   65.95    4.82
   4  -2   5   57.79    3.93
   4  -2   5   64.42    3.99
   4  -2   5   69.66    4.33
   4   2   5   72.01    4.84
   4   2   5   73.73    5.38
   4   2   5   68.26    4.71
   4   2   5   69.27    5.27
   5   4   3    1.63    1.05
   5   4   3    1.07    1.08
   5   4   3    0.96    0.83
   5   4   3    1.35    0.71
   5   4   3    1.69    1.29
   5  -4   3    1.47    0.87
   5   4   3    1.18    0.72
   5   4   3    2.24    1.09
   5  -4   3    1.60    0.93
   5   4   3    0.43    0.90
   2   1   6    6.29    0.90
   2  -1   6    5.26    0.75
   2   1   6    8.48    1.09
   2   1   6    8.12    1.52
   2   1   6    7.48    0.95
   2  -1   6    6.70    0.81
   2  -1   6    7.11    1.06
   2   1   6    7.28    1.07
   2  -1   6    8.32    1.00
   2  -1   6    7.21    0.89
   2   1   6    7.69    1.16
  -3   4   5   20.04    1.41
  -3   4   5   21.04    1.59
  -3   4   5   22.38    1.58
  -3   4   5   23.09    2.08
  -3  -4   5   23.46    1.74
  -3  -4   5   23.16    1.77
   3   4  -5   22.99    1.76
  -3   4   5   22.26    2.33
  -3   4   5   25.07    1.88
  -3   4   5   23.41    1.85
  -3   4   5   22.66    1.78
  -3   4   5   24.56    1.94
  -3   4   5   21.81    1.60
   2   6   0 1487.43   92.33
  -2   6   0 1430.37   80.46
  -2   6   0 1482.92   89.50
   2   6   0 1357.90   90.71
   2   6   0 1476.50   92.17
  -2   6   0 1623.62  114.42
   2   6   0 1305.11   75.04
  -2   6   0 1551.50  106.28
  -2   6   0 1518.15  110.90
   2   6   0 1544.70  110.87
   2   6   0 1588.36  117.84
  -1   6  -1  495.58   29.84
  -1   6  -1  401.67   26.72
   1   6   1  396.23   28.23
   1   6   1  447.38   26.04
  -1   6  -1  445.84   25.31
  -1   6  -1  437.54   26.61
   1  -6   1  401.13   24.02
   1   6   1  480.35   29.78
   1   6   1  455.00   28.55
   1   6   1  486.39   27.73
   1   6   1  464.79   28.28
 -10   0   3   -0.01    0.94
 -10   0   3    0.10    0.86
 -10   0   3    0.39    1.10
 -10   0   3    0.09    0.65
  10   0  -3    0.21    0.78
  10   0  -3    0.08    0.74
   1  -2   6   29.17    1.85
   1  -2   6   35.15    2.30
   1   2   6   29.66    2.02
   1   2   6   34.99    2.64
   1   2   6   34.72    2.44
   1  -2   6   31.13    2.06
   1  -2   6   33.08    2.23
   1   2   6   26.24    1.70
   1   2   6   29.95    2.11
   1   2   6   32.56    2.16
   1  -2   6   28.78    1.84
  10   0   0   97.25    6.66
 -10   0   0   83.05    5.39
  10   0   0   97.63    6.60
   9   2   1    1.90    0.80
   9  -2   1    0.95    0.96
   9   2   1    1.25    0.95
   9   2   1    2.68    1.01
   9   2   1    1.60    0.86
   9  -2   1    1.49    0.98
   9   2   1    1.62    0.86
  -9   2  -1    1.50    0.66
   5   3   4   11.54    1.09
   5  -3   4   14.17    1.45
   5   3   4   12.90    1.85
   5  -3   4   13.51    1.34
   5   3   4   14.89    1.25
   5   3   4   15.89    1.54
   5   3   4   12.81    1.26
   5   3   4   15.19    1.53
   5   3   4   11.96    1.09
   5  -3   4   14.04    1.27
  -6   5   1   11.13    1.25
  -6   5   1   15.54    1.47
  -6   5   1    9.60    1.15
  -6   5   1    9.80    1.15
   6   5  -1   10.41    0.98
   6   5  -1   11.00    1.03
   6   5  -1   11.57    1.47
   6   5  -1   10.49    1.22
  -6   5   1   10.94    1.10
  -6   5   1   11.27    1.22
   6   5  -1   10.49    1.17
   2   6  -1  895.41   54.67
   2   6  -1  908.20   51.66
  -2   6   1  930.29   54.16
  -2   6   1  978.16   58.07
   2   6  -1  881.65   49.22
  -2   6   1  988.13   59.87
   2   6  -1  961.02   57.28
   2   6  -1  964.25   54.10
  -2   6   1 1015.54   57.58
  -2   6   1  789.52   57.70
  -2   6   1  983.87   56.45
   2   6  -1  935.15   52.48
   0   4   5   18.17    1.31
   0   4   5   18.91    2.17
   0   4   5   17.22    1.44
   0   4   5   17.95    1.53
   0   4   5   13.91    2.26
   0  -4   5   17.66    1.36
   0  -4   5   19.57    1.63
   0   4   5   19.80    1.55
   0   4   5   17.53    1.38
   0   4   5   18.58    1.92
   0   4   5   19.38    1.77
   0  -4   5   18.45    1.59
   0   4   5   23.15    1.95
   9   3  -1  204.99   14.38
   9  -3  -1  222.98   13.61
   9   3  -1  221.79   14.00
   9  -3  -1  210.29   13.16
  -9   3   1  200.21   12.08
  -9   3   1  210.95   14.38
  -9   3   1  186.70   13.62
  -9   3   1  208.49   12.60
   6   2   4 1033.37   59.32
   6   2   4 1077.25   73.89
   6   2   4 1009.20   71.38
   6  -2   4  911.72   54.15
   6  -2   4  976.59   65.08
   6   2   4 1057.08   79.67
   6  -2   4 1021.38   66.24
   6   2   4  990.17   78.21
   6  -2   4 1075.14   62.00
   5   0   5    0.46    0.68
   5   0   5   -0.10    0.93
   5   0   5    0.70    0.96
   5   0   5   -0.26    0.72
   5   0   5    0.41    0.73
   5   0   5    0.87    0.83
   5   0   5    1.43    1.38
   9   3  -2  232.72   16.16
   9   3  -2  254.52   15.98
   9  -3  -2  204.45   12.23
  -9   3   2  236.92   13.90
  -9   3   2  247.95   15.67
   9  -3  -2  227.78   13.23
  -9   3   2  244.43   16.04
  -9   3   2  248.20   16.03
   3   3   5  127.16    8.74
   3   3   5  137.93    9.49
   3  -3   5  128.21    7.70
   3   3   5  115.88    6.91
   3  -3   5  142.25    8.26
   3  -3   5  139.21   17.79
   3   3   5   85.25   11.08
   3   3   5  141.73    9.15
   3   3   5  109.47    6.40
   3   3   5  125.01    7.23
   3   3   5  129.37    9.57
  -5   5   3  695.11   43.46
   5   5  -3  632.31   38.14
  -5  -5   3  639.49   39.30
   5   5  -3  631.79   38.49
   5   5  -3  718.86   44.47
  -5   5   3  667.24   40.42
  -5   5   3  622.29   38.95
  -5   5   3  667.92   39.32
   5   5  -3  658.15   36.80
  -5   5   3  662.37   39.34
  -5   5   3  567.38   34.06
   8   0   3    0.23    0.77
   8   0   3    0.55    0.80
   8   0   3    0.86    0.57
   8   0   3    1.62    1.16
   8   0   3    0.29    0.66
  -1  -5   4   31.86    2.23
   1   5  -4   31.26    2.13
  -1   5   4   27.20    1.99
  -1   5   4   30.46    2.48
  -1   5   4   30.01    2.35
  -1   5   4   30.95    2.40
  -1   5   4   28.23    2.08
  -1   5   4   30.05    2.15
  -1   5   4   29.50    2.10
  -1   5   4   30.91    2.50
  -1   5   4   29.38    2.00
  -1  -5   4   30.99    2.16
  -2  -5   4    3.54    0.84
  -2   5   4    3.62    0.88
  -2   5   4    3.50    0.77
  -2   5   4    2.87    0.86
  -2   5   4    3.44    1.44
  -2   5   4    4.41    0.92
  -2   5   4    3.64    0.79
  -2   5   4    3.89    0.99
  -2   5   4    3.88    1.06
  -2  -5   4    3.30    0.92
   2   5  -4    3.19    0.90
   6   5   0    0.55    1.12
   6   5   0   -0.17    1.08
  -6   5   0    0.40    0.90
   6   5   0   -0.15    0.98
  -6   5   0    0.49    0.77
  -6   5   0   -0.07    0.81
  -6   5   0    0.78    0.88
  -6   5   0   -0.14    0.84
   6  -5   0   -0.03    0.67
   6   5   0    0.40    0.59
   6   5   0    0.07    0.64
 -10   1   3   79.29    5.13
  10   1  -3   78.46    5.12
  10  -1  -3   80.85    5.05
 -10  -1   3   87.93    5.64
 -10   1   3   88.01    5.57
 -10   1   3   78.33    5.24
 -10   1   3   65.78    6.03
 -10  -1   3   84.98    5.14
  10   1  -3   80.39    5.44
  10  -1  -3   83.71    5.35
  10  -1   0  395.31   26.62
  10   1   0  403.84   26.33
  10  -1   0  372.68   26.62
  10   1   0  302.01   18.65
  10   1   0  393.79   26.72
   8   3  -4  126.11    7.69
  -8   3   4  127.02    7.53
   8   3  -4  130.89    8.06
  -8   3   4  132.58    8.37
  -8  -3   4  131.98    9.37
  -8   3   4  115.15    7.01
  -8   3   4  128.36    8.00
  -8   3   4  124.15    7.67
  -8   3   4  113.79    6.66
  -8   3   4  123.74    7.56
  -4   4   5  216.34   12.69
  -4   4   5  214.80   13.14
  -4   4   5  210.68   12.69
  -4   4   5  243.84   14.38
  -4   4   5  210.91   12.65
  -4   4   5  196.79   11.40
   4   4  -5  202.72   12.25
  -4   4   5  206.92   12.87
  -4   4   5  186.57   11.04
  -4  -4   5  213.60   12.59
  -3   5  -3   44.22    2.77
   3   5   3   38.49    4.18
   3   5   3   33.19    2.51
   3   5   3   41.58    3.28
   3  -5   3   38.96    2.70
   3  -5   3   42.13    2.84
   3   5   3   40.30    2.62
   3   5   3   35.42    2.56
   3   5   3   38.82    2.84
   3   5   3   42.18    2.75
   3   5   3   39.50    2.71
   9   0   2  505.48   31.85
   9   0   2  497.34   32.54
   8   4  -1    0.86    0.91
   8   4  -1    1.81    1.00
  -8   4   1    1.10    0.88
  -8   4   1    1.39    0.79
   8  -4  -1    0.96    0.76
  -8   4   1    0.81    0.93
   8   4  -1    1.21    0.78
  -8   4   1    1.07    0.93
   8  -4  -1    0.37    0.75
   8   4  -1    0.95    0.89
  -8   4   1    0.78    0.78
   6   5  -2   67.66    4.57
   6   5  -2   64.66    4.36
  -6   5   2   75.80    4.64
  -6   5   2   66.89    4.43
  -6   5   2   72.46    4.55
  -6   5   2   70.87    4.28
  -6   5   2   72.54    4.65
   6   5  -2   62.71    4.38
  -6  -5   2   61.88    4.13
   6   5  -2   67.21    4.57
   6   5  -2   70.58    4.65
   6   5  -2   63.44    4.09
  -6   5   2   73.90    4.50
  -7   0   6  272.81   15.92
  -7   0   6  237.25   16.46
  -7   0   6  256.24   16.03
  -7   0   6  216.80   14.06
  -7   0   6  215.96   12.76
  -7   0   6  236.15   14.48
   2   6   1   12.08    1.13
   2   6   1   11.26    1.27
  -2   6  -1    8.58    1.13
  -2   6  -1   10.47    1.05
   2   6   1    8.49    1.21
   2   6   1    8.63    1.09
   2   6   1   11.16    1.14
   2   6   1   11.71    1.30
   2  -6   1    8.84    0.95
  -2   6  -1   10.28    0.93
   2   6   1    9.13    0.99
  -2   6  -1   10.36    1.14
  -2   3   6   26.70    1.82
  -2  -3   6   25.97    2.09
   2   3  -6   25.15    2.05
  -2   3   6   32.02    2.43
  -2   3   6   28.60    2.03
  -2  -3   6   23.81    2.30
  -2   3   6   27.93    2.04
  -2   3   6   31.68    2.20
  -2   3   6   20.58    1.98
  -2   3   6   24.25    1.67
  -9   2   4  107.13    6.85
  -9   2   4   95.88    6.23
  -9  -2   4  105.56    6.87
   9   2  -4  104.87    7.75
  -9   2   4   97.48    6.38
  -9   2   4  111.12    7.09
  -9   2   4   86.72    5.25
   9   2  -4  111.02    6.75
   5  -1   5  130.46    7.91
   5  -1   5  132.82    8.09
   5  -1   5  116.67    7.22
   5   1   5  132.70    8.72
   5   1   5  137.66    8.55
   5   1   5  112.74    8.23
   5  -1   5  139.37    7.89
   5   1   5  127.50    7.33
   5   1   5  119.15    7.75
   0   5   4    0.66    0.69
   0   5   4    0.43    0.87
   0   5   4    0.91    1.08
   0   5   4    0.62    0.76
   0   5   4    0.70    0.79
   0   5   4    0.12    1.03
   0   5   4    0.24    0.97
   0  -5   4    0.53    0.87
   0  -5   4    0.60    0.78
   0   5   4    1.86    1.26
   0   5   4    0.78    0.79
  -3   3   6   80.38    5.65
  -3  -3   6   69.21    6.18
  -3  -3   6   71.52    5.00
  -3   3   6   83.93    6.39
  -3   3   6   89.54    6.56
  -3   3   6   86.76    6.28
   3   3  -6   62.95    6.23
  -3   3   6   84.24    5.96
  -3   3   6   81.25    5.77
  -3  -3   6   67.12    7.15
  -3   3   6   75.97    5.46
  -3   5   4   57.77    4.24
  -3   5   4   72.16    5.34
  -3   5   4   56.43    4.29
  -3   5   4   66.14    4.74
  -3  -5   4   62.72    4.80
   3   5  -4   62.49    4.62
  -3  -5   4   64.93    4.78
  -3   5   4   64.27    4.83
  -3   5   4   65.08    4.95
  -3   5   4   65.15    4.79
  -3   5   4   54.62    4.68
   8   4  -2   63.94    4.69
   8   4  -2   53.62    4.04
  -8   4   2   59.84    4.53
  -8   4   2   55.06    4.40
  -8   4   2   56.43    4.15
  -8   4   2   53.72    4.31
  -8   4   2   48.39    4.02
   8   4  -2   55.94    4.27
   8   4  -2   42.08    3.29
   1   6  -2 1327.66   93.60
  -1  -6   2 1316.78   94.47
  -1   6   2 1468.79  192.52
  -1   6   2 1382.09  179.94
  -1   6   2 1426.33  189.75
  -1   6   2 1454.82  191.86
   1   6  -2 1510.63  196.94
  -1   6   2 1330.01   93.68
  -1   6   2 1139.11   80.77
   1   6  -2 1405.22  183.17
  -1  -6   2 1327.43   94.62
   8   1   3   21.03    2.06
   8  -1   3   23.15    2.11
   8  -1   3   22.44    2.03
   8  -1   3   23.85    1.87
   8   1   3   20.37    1.79
   8   1   3   23.79    1.99
   8   1   3   20.04    1.59
   8   1   3   23.54    1.91
  -3   6   0   78.06    5.94
  -3   6   0   81.46    5.92
   3   6   0   64.59    5.11
  -3   6   0   72.09    5.37
   3   6   0   77.03    5.75
   3   6   0   73.22    5.52
   3   6   0   61.83    5.13
   3   6   0   76.29    5.97
   3   6   0   71.70    5.19
  -1   3   6   14.40    1.51
  -1  -3   6   16.28    1.57
  -1   3   6   14.53    1.54
  -1   3   6   14.33    1.30
  -1  -3   6   12.31    1.12
  -1   3   6   15.57    1.46
   1   3  -6   14.54    1.43
  -1   3   6   15.63    1.46
  -1  -3   6   16.61    1.49
  -1   3   6   14.52    1.35
  -1   3   6   18.12    1.76
  -8   2   5   55.11    4.59
  -8  -2   5   60.83    4.66
  -8   2   5   69.75    5.47
  -8  -2   5   66.67    5.47
  -8   2   5   68.21    5.12
  -8   2   5   59.50    4.37
   8   2  -5   51.30    4.84
  -8   2   5   56.62    4.10
  -8   2   5   63.19    4.56
  -8   2   5   68.94    5.59
   8   2  -5   61.27    5.25
  -8   2   5   48.45    5.41
  -8  -2   5   49.51    4.87
  -3   6   1  117.55    8.19
   3   6  -1  124.22    8.93
  -3   6   1  129.08    9.41
   3   6  -1  130.23    9.56
   3   6  -1   96.30    6.76
   3   6  -1  125.45    9.57
  -3   6   1  126.56    9.36
  -3  -6   1  100.25    7.03
  -3   6   1  130.47    9.19
   3   6  -1   97.24    6.82
   3   6  -1  118.47    8.68
  -3   6   1  118.64    8.90
  -9   3   0   55.14    4.41
   9   3   0   47.04    5.88
   9   3   0   52.96    4.29
  -9   3   0   54.63    3.95
   9  -3   0   56.34    4.57
   9  -3   0   48.02    4.41
   9   3   0   57.04    4.37
  -9   3   0   57.62    4.27
  -9   3   0   58.93    4.40
   9   3   0   58.15    4.58
   0   6   2  203.09   14.57
   0   6  -2  195.88   13.85
   0   6   2  240.80   17.08
   0   6   2  219.03   15.83
   0  -6   2  222.81   15.94
   0   6  -2  225.70   15.80
   0   6   2  221.89   18.03
   0  -6   2  215.25   15.22
   0   6   2  221.92   16.55
   0   6   2  240.96   17.97
   0   6  -2  239.82   17.35
   0   6   2  235.44   16.71
   0   6  -2  234.49   16.58
   6   2  -6  231.74   16.51
  -6   2   6  214.29   15.09
  -6   2   6  233.23   16.80
  -6   2   6  225.66   16.10
  -6  -2   6  213.75   15.29
  -6   2   6  226.01   16.53
  -6  -2   6  233.92   16.68
   6   2  -6  214.28   15.23
  -6  -2   6  183.41   13.55
  -6   2   6  211.91   15.29
  -6   2   6  183.51   13.95
  -6   2   6  177.90   16.09
  -6  -2   6  220.88   15.51
   1   4   5  201.37   13.94
   1   4   5  230.95   16.34
   1   4   5  202.75   13.92
   1   4   5  231.27   16.13
   1   4   5  230.04   16.51
   1  -4   5  178.55   13.59
   1   4   5  197.11   14.53
   1   4   5  182.36   13.22
   1  -4   5  209.62   16.01
   1  -4   5  209.70   16.20
   1   4   5  217.58   15.62
   1   4   5  256.27   18.58
   9  -1   2  159.76   11.64
   9   1   2  145.32   11.04
   9   1   2  124.38    9.63
   9  -1   2  147.23   11.17
   9   1   2  144.72   10.92
   9   1   2  129.51    9.42
   3   0   6   14.49    1.28
   3   0   6   16.48    1.62
   3   0   6   15.36    1.49
  10  -2  -2   27.63    2.24
 -10   2   2   25.68    2.13
  10   2  -2   27.82    2.27
  10   2  -2   25.60    2.14
 -10   2   2   26.42    2.21
 -10   2   2   26.58    2.31
  10  -2  -2   27.31    2.19
 -10   2   1  122.29    8.81
  10  -2  -1  126.91   10.00
  10   2  -1  124.94    8.96
  10   2  -1  133.00    9.76
 -10   2   1  128.79    9.42
  10  -2  -1  107.42    9.50
  10   2  -1  135.91   10.41
 -10   2   1  137.54   10.41
   7   1  -6  536.11   37.65
   7   1  -6  601.83   41.92
  -7  -1   6  544.15   37.72
  -7  -1   6  540.98   38.53
  -7   1   6  550.89   41.04
  -7  -1   6  430.51   54.86
  -7   1   6  620.42   44.52
  -7   1   6  601.51   43.70
  -7   1   6  569.94   43.60
  -7   1   6  548.16   39.45
  -7   1   6  632.40   45.42
  -7  -1   6  497.51   37.32
  -7   1   6  659.37   46.38
   7   0   4 1316.38  100.17
   7   0   4 1378.83  180.02
   7   0   4 1135.55  104.06
   7   0   4 1088.33   78.36
   7   0   4 1277.31   87.04
   7   0   4 1306.14   92.82
  -2   6   2   59.82    4.33
  -2   6   2   59.26    4.27
  -2   6   2   56.74    4.27
  -2   6   2   55.82    4.80
  -2   6   2   54.77    4.20
  -2   6   2   64.42    4.93
   2   6  -2   63.47    4.59
   2   6  -2   64.62    4.84
  -2  -6   2   59.52    4.44
   2   6  -2   56.60    4.10
  -8   4   0  384.50   30.29
   8   4   0  309.03   25.01
   8   4   0  393.82   28.70
   8   4   0  385.56   27.21
   8   4   0  388.25   27.47
   8   4   0  328.35   25.48
   8   4   0  406.30   30.16
  -8   4   0  358.60   26.22
   8  -4   0  380.92   27.89
  -8   4   0  391.63   27.67
   8  -4   0  398.21   28.80
  -8   4   0  392.47   29.99
  -8   4   0  363.95   26.92
   7   3  -5    5.73    0.99
  -7  -3   5    5.58    0.99
  -7   3   5    8.55    1.02
  -7   3   5    8.16    1.10
   7   3  -5    7.64    1.05
  -7   3   5    9.12    1.28
  -7   3   5    8.16    1.10
  -7  -3   5    9.47    1.24
  -7   3   5    6.99    1.06
  -7  -3   5    7.20    0.99
  -7   3   5    9.35    1.23
  -7   3   5    8.38    1.05
  -7  -3   5    7.50    1.02
  -7   3   5    7.30    0.89
  -9   3   3   55.38    4.05
  -9   3   3   57.87    4.52
  -9   3   3   51.44    4.36
   9   3  -3   58.15    4.68
  -9   3   3   61.54    4.62
   9   3  -3   62.09    4.65
  -9   3   3   63.59    4.95
   4   3  -6  384.92   27.86
  -4   3   6  344.06   23.44
  -4   3   6  349.58   29.67
  -4   3   6  340.07   23.57
  -4   3   6  420.27   29.04
  -4   3   6  373.06   25.92
  -4   3   6  339.58   23.33
  -4  -3   6  285.58   27.84
  -4  -3   6  330.60   22.99
  -4   3   6  376.14   27.72
  -4   3   6  376.98   27.08
   2  -2   6  952.71   64.42
   2   2   6  781.00   58.56
   2   2   6  871.46   59.12
   2  -2   6  855.41   58.19
   2  -2   6  782.66   54.75
   2   2   6  799.55   55.00
   2  -2   6  902.79   61.77
   2   2   6  896.55   64.86
   2   2   6  757.08   55.85
   2  -2   6  893.56   61.38
   2   2   6  785.49   55.57
   4  -4   4 1364.62  103.27
   4   4   4 1344.65  101.52
   4   4   4 1483.18  198.26
   4   4   4 1521.01  202.64
   4   4   4 1315.11  100.31
   4   4   4 1394.75  187.29
   4   4   4 1333.88   92.82
   4  -4   4 1362.04  104.13
   4   4   4 1214.47   85.74
   1  -6   2  533.39   38.82
   1   6   2  594.32   41.92
   1  -6   2  495.79   35.52
   1   6   2  560.28   40.25
   1   6   2  506.54   35.82
  -1   6  -2  519.39   35.96
  -1   6  -2  543.17   38.28
   1   6   2  568.66   44.13
  -1   6  -2  496.63   39.98
  -1   6  -2  509.09   35.80
   1   6   2  564.68   42.24
   9   0  -5   -0.02    0.76
  -9   0   5   -0.17    0.97
  -9   0   5   -0.18    0.85
  -9   0   5   -0.46    0.93
  -9   0   5    0.04    0.85
   9   0  -5   -0.34    0.68
  -9   0   5    0.85    0.87
   1   5   4   45.33    3.60
   1  -5   4   51.73    4.02
   1  -5   4   52.58    3.90
  -1   5  -4   58.01    4.27
   1   5   4   50.07    3.81
   1   5   4   54.28    4.20
   1   5   4   55.19    4.29
   1   5   4   52.36    3.91
   1   5   4   47.10    3.49
   1   5   4   52.40    4.28
   1   5   4   47.19    3.74
  -5   5  -2    1.98    0.93
   5   5   2    1.97    1.42
   5   5   2    1.81    0.92
   5  -5   2    2.13    0.91
   5   5   2    1.57    0.91
   5   5   2    2.03    0.99
   5  -5   2    1.60    0.88
  -5   5  -2    2.14    0.70
   0  -3   6  104.99    7.32
   0   3   6   95.79    7.54
   0   3   6  111.76    8.07
   0  -3   6  102.09    8.21
   0   3   6  124.79    9.26
   0   3   6  106.63    7.55
   0   3   6  108.69    7.61
   0   3   6  110.64    7.96
   0   3   6  110.97    8.08
   0  -3   6  102.04    8.20
  -5   4   5   35.52    4.80
  -5   4   5   29.94    4.01
  -5   4   5   35.55    4.83
  -5   4   5   33.17    2.64
  -5   4   5   38.28    3.11
  -5   4   5   33.54    4.49
   5   4  -5   33.90    2.57
   5   4  -5   31.21    4.25
  -5   4   5   33.83    4.57
  -5  -4   5   32.36    4.40
  -5   4   5   38.05    5.08
  -5   4   5   48.69    4.34
   3   1   6   23.81    3.23
   3  -1   6   26.01    3.48
   3   1   6   25.76    3.46
   3  -1   6   23.03    3.10
   3   1   6   24.08    7.78
   3   1   6   25.47    3.55
   3  -1   6   25.92    3.56
   3   1   6   27.32    3.77
   3  -1   6   25.42    3.39
   3   1   6   21.36    3.00
   3  -1   6   25.42    3.48
  -2   0   7    0.03    0.67
  -2   0   7    0.09    1.01
  -2   0   7    0.04    0.66
  -2   0   7   -0.16    0.59
  -2   0   7    0.05    0.85
  -2   0   7    0.15    0.80
  -4  -5   4  161.77   21.34
   4   5  -4  162.56   21.36
  -4   5   4  189.43   24.61
  -4   5   4  166.25   21.65
  -4   5   4  154.76   20.12
  -4   5   4  179.80   23.60
  -4   5   4  176.00   22.76
  -4   5   4  156.83   20.73
  -4   5   4  146.34   19.25
  -4   5   4  176.36   23.09
  -3   0   7    0.30    0.86
  -3   0   7   -0.26    1.03
  -3   0   7   -0.24    0.56
  -3   0   7   -0.38    0.74
  -3   0   7    0.13    0.64
  -3   0   7   -0.28    0.91
   8   3   2   26.88    3.79
   8  -3   2   29.31    4.07
   8   3   2   36.55    5.11
   8   3   2   25.32    3.53
  -8   3  -2   34.66    4.66
  -8   3  -2   27.39    3.70
   8   3   2   26.93    4.35
   8   3   2   25.71    3.46
   8   3   2   27.92    3.76
   8  -3   2   34.90    4.88
   7   3   3  171.25   22.66
   7  -3   3  142.81   19.04
   7  -3   3  161.75   21.40
   7   3   3  120.56   16.94
   7   3   3  134.53   17.71
   7  -3   3  155.62   20.77
   7   3   3  146.91   19.83
   7   3   3  138.82   18.00
   7   1   4  100.10   13.10
   7  -1   4  110.70   14.69
   7   1   4   90.75   12.08
   7   1   4  100.32   13.84
   7   1   4  110.32   14.35
   7   1   4   94.10   12.28
   7  -1   4  110.67   14.48
   7  -1   4  106.28   13.95
   7   1   4  112.46   15.09
   7  -1   4  103.42   13.84
   6  -5   1  240.51   31.91
   6  -5   1  295.33   39.52
  -6   5  -1  276.43   36.36
   6   5   1  322.19   42.04
   6   5   1  259.34   35.02
   6   5   1  277.92   39.24
   6   5   1  288.60   38.13
  -6   5  -1  325.26   42.34
  -7  -4   4   69.53    9.33
  -7   4   4   70.40    9.15
  -7   4   4   70.34    9.18
  -7   4   4   74.83    9.87
  -7   4   4   66.28    8.82
  -7   4   4   69.16    9.19
   7   4  -4   73.56    9.77
  -7  -4   4   71.95    9.56
  -7   4   4   74.74    9.78
  -7   4   4   77.97   10.29
   7   4  -4   72.75    9.65
 -10   0   4   27.38    3.76
 -10   0   4   27.20    3.82
  10   0  -4   32.20    4.34
 -10   0   4   26.55    3.65
 -10   0   4   27.46    3.87
  10   0  -4   28.27    3.83
   3   6   1    2.08    1.20
   3   6   1    0.34    1.05
   3  -6   1    0.45    0.68
   3   6   1    0.90    0.99
  -3   6  -1    0.93    0.84
   3   6   1    0.63    0.77
   3   6   1    1.23    0.95
  -3   6  -1    1.46    0.86
  -3   6  -1    0.95    0.86
   3  -6   1    1.29    0.75
   3   6   1    0.90    0.81
   3   6   1    0.65    0.98
  10   0   1   -0.60    0.86
  10   0   1   -0.45    0.81
  -3   6   2   43.05    5.78
   3   6  -2   36.65    5.00
   3   6  -2   42.58    5.66
  -3   6   2   35.39    4.77
   3   6  -2   38.78    5.17
  -3   6   2   36.50    4.98
  -3  -6   2   40.01    5.34
   3   6  -2   34.68    4.55
   3   6  -2   38.74    5.12
   3   6  -2   37.51    4.96
  -3   6   2   42.62    5.79
  -9   1   5  168.67   22.62
  -9   1   5  180.11   23.98
  -9   1   5  122.98   19.13
  -9  -1   5  166.76   21.98
   9   1  -5  163.30   21.48
   9   1  -5  170.50   22.36
  -9  -1   5  145.74   19.29
  -9   1   5  155.69   20.67
  -9  -1   5  158.83   21.32
  -9   1   5  175.03   22.87
  -1   0   7    1.02    0.69
  -1   0   7   -0.08    0.93
  -1   0   7   -0.00    0.60
  -1   0   7    0.77    0.73
  -1   0   7    0.54    0.98
  10   2  -3   10.67    1.66
 -10   2   3   10.72    1.72
  10  -2  -3   10.05    1.56
 -10   2   3   11.85    1.89
 -10   2   3   11.14    1.69
 -10  -2   3   12.27    2.08
  10  -2  -3    9.71    1.50
  10   2  -3   11.85    1.80
   8   4  -3   35.59    4.87
  -8   4   3   25.25    3.86
  -8   4   3   36.24    4.92
  -8   4   3   28.31    4.07
  -8   4   3   34.28    4.66
  -8   4   3   31.38    4.24
   8   4  -3   34.02    4.62
  -4   0   7    0.11    0.78
  -4   0   7    0.22    0.92
  -4   0   7   -0.28    0.72
  -4   0   7    0.08    0.80
  -4   0   7   -0.39    0.98
 -10   2   0  709.34   94.74
  10   2   0  548.25   84.83
  10   2   0  672.55   91.22
  10  -2   0  639.84   86.08
  10   2   0  518.63   77.60
  10   2   0  618.86   81.02
  10  -2   0  697.38   94.47
   7   4   2  682.06   92.17
  -7   4  -2  583.08   76.95
   7   4   2  718.95   95.96
  -7   4  -2  477.21   63.58
   7   4   2  698.70   94.16
   7   4   2  713.18   96.28
  -7   4  -2  709.95   93.60
   7  -4   2  530.55   75.83
   7  -4   2  496.49   73.84
  -6  -5   3  252.29   34.28
   6   5  -3  264.21   34.89
   6   5  -3  257.19   33.75
  -6   5   3  318.78   41.46
  -6   5   3  273.23   36.87
  -6   5   3  255.48   33.97
  -6   5   3  281.77   37.67
   6   5  -3  299.90   38.87
  -6   5   3  220.33   32.43
   6   5  -3  231.82   31.89
   6   5  -3  240.71   33.52
  -6   5   3  310.10   40.30
  -2  -1   7   27.04    3.63
  -2  -1   7   24.08    3.21
  -2   1   7   28.90    3.84
  -2   1   7   24.00    3.23
  -2   1   7   26.23    3.53
  -2   1   7   29.32    3.94
  -2  -1   7   21.91    3.07
  -2   1   7   23.19    3.17
  -2   1   7   30.07    4.16
   4   6  -1  132.74   17.48
  -4   6   1  124.51   16.39
  -4   6   1  100.52   13.56
   4   6  -1  130.17   16.97
  -4   6   1  138.37   18.15
   4   6  -1   99.18   13.30
  -4   6   1  115.90   15.97
   4   6  -1  119.31   15.91
   4   6  -1  100.72   13.08
   4   6  -1  108.69   14.16
  -3  -1   7   34.90    4.57
  -3   1   7   30.92    4.32
  -3  -1   7   31.44    4.22
  -3   1   7   34.32    4.52
  -3   1   7   29.32    4.31
  -3  -1   7   34.44    4.63
  -3   1   7   24.55    3.29
  -3   1   7   33.07    4.39
  -3   1   7   32.46    4.30
  -3  -1   7   30.22    4.03
   5  -2   5  876.44   78.87
   5   2   5  853.09   83.62
   5  -2   5  751.54   70.41
   5   2   5  517.00   75.87
   5  -2   5  750.84   71.30
   5  -2   5  745.59   96.79
   5   2   5  597.85   82.84
   5   2   5  752.19   72.22
   5   2   5  821.78   77.38
   5   2   5  799.35   73.25
  -4   6   0  361.12   47.19
   4   6   0  319.89   41.74
   4   6   0  321.89   43.55
   4   6   0  325.70   42.98
  -4   6   0  313.06   43.71
   4   6   0  279.07   37.59
   4   6   0  325.22   42.95
  -4   6   0  365.37   48.04
   5   3  -6  100.48   13.21
  -5   3   6  107.00   13.91
  -5  -3   6   97.04   12.83
   5   3  -6   90.59   12.03
  -5  -3   6   90.31   11.80
  -5   3   6  100.81   13.40
  -5   3   6   99.81   13.09
  -5   3   6   95.52   12.75
  -5  -3   6   85.01   11.18
  -5   3   6   92.25   11.99
  -5   3   6  105.51   14.11
  -5   3   6   86.87   11.44
  -5   3   6   88.60   11.47
 -10   1   4  155.45   20.81
  10   1  -4  148.09   19.75
 -10  -1   4  124.94   17.00
 -10   1   4  161.69   21.35
 -10  -1   4  113.98   15.20
 -10   1   4  163.59   21.57
  10   1  -4  160.70   21.40
  10  -1  -4  124.10   16.22
 -10   1   4  151.10   20.05
  10  -1  -4  148.19   19.32
   2  -6   2   22.99    3.20
   2   6   2   22.57    3.07
   2   6   2   25.35    3.43
   2   6   2   27.66    3.91
   2   6   2   28.15    3.90
  -2   6  -2   24.16    3.39
  -2   6  -2   24.87    3.34
   2  -6   2   26.29    3.60
  -2   6  -2   28.53    3.87
   2   6   2   27.28    3.76
   2   6   2   27.04    3.85
   2   6   2   26.74    3.75
   4   5   3    2.27    1.00
   4   5   3    2.57    1.26
   4  -5   3    2.65    1.01
   4   5   3    1.50    0.79
   4   5   3    2.47    0.99
   4   5   3    3.73    0.91
   4  -5   3    2.40    0.87
   4   5   3    2.87    1.07
   2  -4   5  154.13   20.30
   2   4   5  153.51   20.01
   2   4   5  126.08   16.81
   2   4   5  141.51   18.52
   2  -4   5   98.41   13.89
   2   4   5  103.37   19.55
   2   4   5  157.35   21.61
   2  -4   5  149.90   20.10
   2   4   5  147.18   20.09
   2   4   5  151.58   20.17
   2   4   5  157.06   20.50
  10  -1   1   49.33    6.69
  10   1   1   54.19    7.31
  10   1   1   54.19    7.24
  10  -1   1   54.46    7.32
   6  -4   3  658.69   86.74
   6   4   3  648.34   85.73
   6   4   3  611.73   92.83
   6   4   3  651.60   86.20
   6  -4   3  701.08   94.44
   6   4   3  546.91   86.81
   6   4   3  647.39   86.75
   6   4   3  612.03   82.96
   6   4   3  680.60   88.24
   4   3   5    1.49    0.93
   4   3   5    1.75    0.79
   4  -3   5    2.47    0.91
   4  -3   5    2.13    0.82
   4   3   5    2.13    0.93
   4  -3   5    2.36    1.00
   4   3   5    1.14    1.10
   4   3   5    2.72    1.41
   4   3   5    0.81    0.97
   8   2   3  200.39   26.51
   8  -2   3  220.12   29.81
   8   2   3  205.62   27.40
   8   2   3  189.48   24.59
   8  -2   3  208.16   26.99
   8  -2   3  187.29   24.57
   8   2   3  192.19   25.08
   8  -2   3  208.36   28.03
   7   5  -1    3.10    1.11
   7   5  -1    2.49    1.61
   7   5  -1    3.85    0.97
   7   5  -1    4.09    1.18
  -7   5   1    2.43    0.94
  -7   5   1    2.78    1.00
  -7   5   1    3.47    0.90
  -7   5   1    2.27    0.90
  -7   5   1    2.83    1.07
   7   5  -1    2.95    0.84
  -1   1   7   72.29    9.68
  -1   1   7   86.38    8.46
  -1  -1   7   85.14    8.61
  -1   1   7   81.45    7.39
  -1  -1   7   79.69    7.57
  -1   1   7   79.67    7.31
  -1   1   7   82.64    7.52
  -1  -1   7   73.29    6.67
   1   3   6   89.93    8.55
   1   3   6  105.06   10.09
   1   3   6   90.39    8.63
   1   3   6  106.21   10.24
   1  -3   6   97.64    8.88
   1   3   6   90.48    8.86
   1   3   6   99.23    9.00
   1   3   6   86.53    8.00
   1  -3   6  110.61   10.15
   1  -3   6  107.80   10.08
  -4   1   7  279.98   26.31
  -4  -1   7  256.12   24.32
  -4  -1   7  242.53   23.49
  -4   1   7  276.87   25.26
  -4  -1   7  212.31   24.84
  -4   1   7  262.01   25.25
  -4   1   7  275.49   24.73
  -4   1   7  166.45   28.30
  -4  -1   7  259.14   26.53
  -4  -1   7  267.25   23.86
   2   5   4    9.39    1.21
   2   5   4   10.80    1.50
   2   5   4   10.73    1.56
   2   5   4    8.52    1.27
   2   5   4   10.94    1.54
   2   5   4    8.32    1.73
   2   5   4   11.63    1.74
   2  -5   4    7.52    1.15
   2  -5   4    9.31    1.34
   2   5   4    7.49    1.49
  -2   5  -4   11.30    1.36
   9   3   1   18.09    1.98
   9  -3   1   15.30    1.91
   9  -3   1   19.17    1.92
   9   3   1   12.93    1.65
   9   3   1   20.78    2.25
   9   3   1   17.43    2.11
  -9   3  -1   18.10    2.19
  -9   3  -1   18.38    2.00
  -9   3  -1   19.99    2.05
   9   3   1   17.49    1.81
   9  -3   1   18.76    2.23
   9   3   1   18.61    2.05
   9   2   2  404.93   38.44
   9   2   2  374.25   35.56
   9  -2   2  440.13   44.24
   9  -2   2  451.97   40.60
  -9   2  -2  382.39   35.73
   9  -2   2  432.54   41.78
   9   2   2  404.24   37.27
   9   2   2  429.54   40.44
  -7  -2   6   13.06    1.62
  -7   2   6   12.29    1.62
  -7  -2   6   12.45    1.55
  -7   2   6   13.06    1.46
   7   2  -6   14.61    1.66
  -7   2   6   13.22    1.64
  -7   2   6   13.23    1.54
  -7  -2   6   12.98    1.59
  -7   2   6   14.20    1.67
  -7   2   6   13.37    1.65
  -7   2   6   15.41    1.80
   7   2  -6   14.30    1.58
  -8   0   6  883.39   92.90
  -8   0   6 1039.86   62.78
  -8   0   6  929.32   86.34
  -8   0   6 1004.64   80.02
  -8   0   6  941.03   93.98
   6   3   4  255.70   28.14
   6  -3   4  201.15   25.39
   6  -3   4  244.57   78.09
   6  -3   4  213.92   20.55
   6   3   4  278.79   25.32
   6   3   4  244.41   23.06
   6   3   4  153.42   28.21
   6   3   4  185.25   18.82
   0   0   7   -0.07    0.70
   0   0   7    0.52    0.91
   0   0   7    0.55    0.72
   0   0   7   -0.13    0.93
   8  -4   1  119.45   11.28
  -8   4  -1   84.98    8.16
   8  -4   1  119.07   11.25
  -8   4  -1  120.89   11.50
   8   4   1   74.22   11.10
   8   4   1  110.17   10.92
   8   4   1  102.40    9.40
   8   4   1   94.99    9.33
   8   4   1  108.29   10.76
  -8   4  -1  110.08   10.24
   8   4   1  103.93    9.66
  -5   0   7   -0.27    0.72
  -5   0   7   -0.81    0.92
  -5   0   7    0.22    0.82
  -5   0   7    0.25    0.83
  -5   0   7   -0.98    0.96
  -5   5   4   39.84    4.04
  -5   5   4   41.63    4.00
  -5   5   4   42.06    4.10
  -5   5   4   38.05    3.71
  -5  -5   4   42.24    4.12
   5   5  -4   41.34    3.96
  -5   5   4   39.93    3.83
   5   5  -4   38.01    3.79
  -5   5   4   43.25    4.21
  -5   5   4   43.15    4.02
  11   0  -2   91.56    9.02
 -11   0   2   90.97    8.90
 -11   0   2   95.60    9.06
  11   0  -2   82.72    8.29
 -11   0   2   80.23    7.58
   7   5  -2    5.40    0.99
   7   5  -2    6.03    1.11
   7   5  -2    4.35    0.94
  -7   5   2    4.86    1.02
  -7   5   2    5.56    1.04
  -7   5   2    4.48    1.04
  -7   5   2    4.74    1.09
  -7   5   2    5.36    1.11
   7   5  -2    3.88    1.11
   7   5  -2    5.92    1.09
   4   6  -2  607.41   77.34
  -4   6   2  812.74   75.47
  -4   6   2  704.25   65.26
  -4   6   2  849.88   78.16
   4   6  -2  800.86   73.13
  -4   6   2  766.92   70.33
   4   6  -2  736.27   66.24
  -4   6   2  717.73   76.91
   4   6  -2  789.92   72.33
   4   6  -2  742.22   67.04
  -4  -6   2  806.59   74.19
   7   5   0   -0.15    1.36
  -7   5   0    0.20    0.84
   7  -5   0    0.37    0.75
  -7   5   0    1.33    0.76
   7   5   0    0.76    1.04
  -7   5   0    0.41    0.87
   7   5   0    0.57    0.72
   7   5   0    0.33    0.92
  -7   5   0    0.65    0.90
   6   0   5    0.62    0.99
   6   0   5    0.52    0.89
   6   0   5    0.82    0.72
   6   0   5    1.11    0.76
   6   0   5    0.91    0.98
   1   6  -3  152.15   13.75
  -1   6   3  157.10   14.38
  -1   6   3  161.85   14.86
  -1   6   3  158.09   15.01
  -1   6   3  130.61   15.63
   1   6  -3  162.22   14.98
  -1   6   3  134.83   14.39
  -1   6   3  151.18   15.15
   1   6  -3  150.74   16.11
  -1  -6   3  165.89   15.46
  -1  -6   3  157.94   14.67
  -1   6   3  148.39   17.72
  11   0  -1   -0.52    0.86
  11   0  -1   -0.14    0.80
 -11   0   1   -0.05    0.97
  -6  -4   5    3.21    0.91
  -6   4   5    3.12    0.98
  -6   4   5    2.82    0.83
   6   4  -5    2.79    0.83
  -6  -4   5    3.19    0.86
  -6   4   5    2.30    0.67
  -6   4   5    2.84    0.92
   6   4  -5    3.29    0.83
  -6   4   5    3.22    0.92
  -6   4   5    2.74    0.79
  -6   4   5    2.65    1.03
   6   4  -5    2.62    0.81
   3  -2   6  711.17   65.10
   3  -2   6  802.03   73.31
   3   2   6  598.24   69.88
   3  -2   6  772.57   69.23
   3   2   6  823.57   77.54
   3   2   6  671.07   64.12
   3  -2   6  818.25   73.70
   3   2   6  755.59   70.11
   3   2   6  762.59   68.82
   3   2   6  626.20   65.04
  -2   6   3   13.59    1.59
  -2   6   3   11.55    1.92
  -2   6   3   14.57    1.60
   2   6  -3   15.12    1.69
   2   6  -3   17.07    2.02
  -2   6   3   18.18    2.13
  -2   6   3   16.70    1.81
   2   6  -3   13.68    1.55
  -2   6   3   13.27    1.48
  -2  -6   3   14.99    1.70
  -2   6   3   13.60    1.71
   0   6  -3   12.70    1.46
   0   6   3   12.71    1.45
   0   6   3   16.74    1.99
   0   6   3   15.51    1.91
   0  -6   3   15.40    1.73
   0   6   3   15.88    2.00
   0   6  -3   13.31    1.71
   0   6   3   11.78    1.57
   0   6   3   14.65    2.12
   0   6   3   15.15    1.85
   7   2   4  136.56   12.61
   7  -2   4  136.07   13.35
   7   2   4  131.85   13.98
   7   2   4  120.75   11.59
   7  -2   4  144.58   13.12
   7  -2   4  157.04   15.02
   7  -2   4  132.97   12.14
   7   2   4  136.90   13.60
   7   2   4  151.44   15.58
  -8   1   6   13.33    1.70
  -8  -1   6   10.34    1.46
  -8   1   6   10.44    1.56
  -8  -1   6   11.86    1.61
  -8   1   6   11.39    1.34
  -8   1   6   12.40    1.50
  -8   1   6   12.19    1.60
   8   1  -6   13.09    1.52
  -8  -1   6   12.24    1.58
  -8  -1   6    9.89    1.28
  -8   1   6   12.97    1.62
   4   6   1  182.28   17.54
   4  -6   1  154.91   14.27
   4   6   1  187.04   17.68
   4   6   1  118.67   11.71
   4   6   1  145.62   15.43
  -4   6  -1  159.37   15.01
  -4   6  -1  177.57   16.31
   4   6   1  161.05   15.23
   4   6   1  180.57   17.61
  -4   6  -1  149.87   15.27
   9   3  -4    5.92    1.13
  -9   3   4    6.20    1.23
  -9  -3   4    6.88    1.80
   9   3  -4    7.60    1.24
  -9   3   4    7.98    1.23
  -9   3   4    6.55    1.20
  -9   3   4    7.55    1.09
  -9   3   4    6.78    1.03
  -9   3   4    7.10    1.12
   4   0   6  308.15   28.34
   4   0   6  253.97   29.64
   0   1   7   20.60    2.83
   0  -1   7   24.64    2.34
   0   1   7   25.12    2.55
   0   1   7   26.93    2.66
   0   1   7   26.27    3.03
   0  -1   7   31.87    3.11
   0  -1   7   29.69    2.84
  -5   1   7   22.19    2.63
  -5   1   7   26.35    2.74
  -5   1   7   25.02    2.53
  -5  -1   7   28.71    2.94
  -5   1   7   29.58    3.43
  -5  -1   7   30.79    3.14
  -5   1   7   29.94    2.93
  -5  -1   7   28.83    3.01
  -5  -1   7   25.73    2.76
  11  -1  -2    5.97    1.12
 -11   1   2    5.17    0.94
  11   1  -2    6.30    1.18
 -11  -1   2   13.12    1.94
 -11   1   2    5.33    1.13
 -11  -1   2    6.58    1.16
  -8  -3   5    1.17    1.17
  -8  -3   5    0.38    0.76
   8   3  -5    0.59    0.97
  -8   3   5   -1.38    1.11
  -8   3   5   -1.49    0.89
  -8   3   5   -2.09    1.70
  -8   3   5   -1.46    1.64
  -8   3   5   -0.39    1.00
  -8   3   5    0.06    0.78
   6  -1   5    6.28    1.15
   6   1   5    7.13    1.67
   6   1   5    6.42    1.15
   6   1   5    6.32    0.98
   6  -1   5    7.54    1.07
   6   1   5    5.86    1.31
   6  -1   5    7.09    1.19
  -9   2   5   15.64    1.76
   9   2  -5   17.50    1.95
  -9  -2   5   13.42    2.18
  -9   2   5   16.48    1.91
  -9  -2   5   14.79    1.66
  -9   2   5   17.10    1.91
  -9   2   5   16.44    1.94
  -9   2   5   15.32    1.64
  11   1  -1   11.37    1.47
 -11  -1   1   13.44    1.98
 -11   1   1   14.82    1.86
 -11  -1   1   13.15    1.61
  11  -1  -1   11.20    1.35
   3   6   2  854.50   81.95
   3   6   2  602.70   74.69
  -3   6  -2  768.81   70.13
   3  -6   2  755.80   70.34
   3   6   2  810.59   77.91
  -3   6  -2  710.69   66.46
   3   6   2  708.72   70.47
  -3   6  -2  847.06   77.66
   3   6   2  684.47   64.98
  -6   3   6   56.30    3.41
  -6   3   6   50.06    5.22
  -6   3   6   54.45    3.97
  -6   3   6   60.73    5.71
   6   3  -6   55.52    3.45
  -6  -3   6   52.64    5.06
  -6   3   6   61.10    5.84
  -6   3   6   49.68    5.74
  -6  -3   6   59.02    5.52
  -6  -3   6   51.66    3.20
  11   0  -3    0.03    0.85
 -11   0   3    0.22    0.95
 -11   0   3   -0.12    0.86
   5   4   4  165.34   12.12
   5   4   4  159.45   11.02
   5   4   4  168.45   10.12
   5  -4   4  157.06   11.15
   5   4   4  153.52   11.96
   5   4   4  166.44    9.96
  -2   2   7   65.48    4.52
  -2  -2   7   73.41    4.39
  -2   2   7   59.54    3.51
  -2   2   7   64.08    3.75
  -2   2   7   66.70    4.00
  -2  -2   7   61.48    3.51
  -2   2   7   61.54    4.53
  -2  -2   7   62.96    3.62
  10   3  -2    1.68    0.88
  10  -3  -2    2.34    0.83
 -10   3   2    1.79    1.00
 -10   3   2    1.20    0.90
 -10   3   2    1.99    0.74
  -3  -2   7    3.26    0.82
  -3   2   7    2.95    0.85
  -3   2   7    2.42    0.84
  -3   2   7    2.82    0.68
  -3   2   7    2.36    0.82
  -3   2   7    3.13    1.08
  -3  -2   7    2.32    0.76
 -10   3   1   31.74    2.20
 -10   3   1   31.12    2.04
 -10   3   1   30.68    2.39
  10   3  -1   35.12    2.53
  10  -3  -1   28.85    2.05
  10   3  -1   33.42    2.53
  10   3  -1   23.26    1.90
  -3   6   3  254.00   18.26
   3   6  -3  256.13   14.55
   3   6  -3  234.94   14.18
  -3  -6   3  246.19   14.42
  -3   6   3  224.94   13.41
  -3   6   3  224.57   16.02
  -3   6   3  237.52   14.62
   3   6  -3  238.51   17.93
  -3   6   3  212.10   12.63
  -3   6   3  257.35   15.83
   5   6  -1   40.41    2.64
   5   6  -1   34.59    2.62
  -5   6   1   37.71    2.62
  -5   6   1   38.40    2.92
  -5   6   1   39.78    2.59
  -5   6   1   39.52    3.15
   5   6  -1   35.83    2.76
   5   6  -1   39.49    2.44
   5   6  -1   38.94    3.19
   9   4  -1  151.71    9.90
   9   4  -1  165.03   10.04
  -9   4   1  150.60    9.37
  -9   4   1  151.17   10.60
  -9   4   1  145.03    8.74
   9   4  -1  131.07    7.98
  -9   4   1  156.17    9.97
   9  -4  -1  138.63    8.25
   4  -1   6   38.39    2.39
   4   1   6   44.71    2.98
   4  -1   6   44.85    2.88
   4   1   6   45.26    3.55
   4  -1   6   44.76    2.77
   4   1   6   40.92    2.75
   4   1   6   37.72    2.58
 -10   2   4    7.00    1.17
 -10   2   4    6.92    0.96
 -10   2   4    7.08    1.17
  10   2  -4    6.98    1.02
   1  -6   3  146.35    9.14
  -1   6  -3  129.84    7.79
   1   6   3  144.68    9.18
   1   6   3  125.02   24.32
   1   6   3  155.92    9.98
  -1   6  -3  157.32    9.52
   1   6   3  146.94    9.26
   1   6   3  152.78    9.23
  10   2   1  360.47   23.02
  10   2   1  285.72   18.15
  10  -2   1  295.64   32.04
   9   4  -2   48.93    3.28
  -9   4   2   49.53    3.29
  -9   4   2   44.54    2.87
  -9   4   2   47.64    3.24
  -9   4   2   40.11    2.93
   9   4  -2   50.60    3.45
   6   5   2    9.98    1.48
   6   5   2    8.91    1.21
   6   5   2   11.26    2.42
  -6   5  -2   10.20    1.16
   6  -5   2    9.81    1.17
  -6   5  -2    7.94    0.86
   6   5   2   10.97    1.26
   1   0   7   -0.32    0.63
   1   0   7    0.73    0.98
   1   0   7   -0.03    1.04
   1   0   7    0.10    0.71
   2  -3   6  690.17   38.75
   2   3   6  635.82   36.36
   2  -3   6  657.05   37.07
   2   3   6  631.30   42.05
   2   3   6  589.07   35.29
   2   3   6  638.36   39.66
   2   3   6  705.98   43.68
   2  -3   6  632.73   38.04
   3  -4   5  326.54   20.59
   3  -4   5  300.31   17.73
   3   4   5  325.33   21.56
   3   4   5  329.29   21.78
   3   4   5  295.89   17.22
   3   4   5  352.66   23.08
   3   4   5  311.55   18.51
   5   6   0  188.81   11.36
  -5   6   0  186.81   10.76
  -5   6   0  202.31   12.37
  -5   6   0  187.90   12.71
   5   6   0  191.43   12.59
   5   6   0  160.48   10.04
   5   6   0  161.09   14.88
  -6   0   7    0.12    0.83
  -6   0   7   -0.07    0.95
  -6   0   7    0.30    0.88
  -6   0   7    0.33    1.07
  11   0   0   44.86    3.44
  -1   2   7    5.92    1.00
  -1   2   7    4.69    1.05
  -1   2   7    4.73    0.94
  -1  -2   7    6.08    1.04
  -1   2   7    5.49    0.88
  -1  -2   7    4.91    0.72
  -1  -2   7    4.96    0.76
  -1  -2   7    4.98    0.83
   9   0   3   -0.00    0.86
  -4   2   7   40.95    3.30
  -4  -2   7   47.75    2.82
  -4   2   7   43.42    3.09
  -4   2   7   37.83    2.36
  -4  -2   7   45.26    2.72
  -4   2   7   45.90    2.91
  -4   2   7   46.45    2.83
   4   2  -7   50.72    3.04
  -4   2   7   40.51    2.55
   3   5   4   19.56    1.64
  -3   5  -4   23.34    1.65
   3   5   4   21.30    1.82
   3   5   4   23.54    4.11
   3   5   4   23.18    1.71
   3   5   4   19.68    2.00
   3  -5   4   16.04    1.90
  -8   4   4   80.62    5.26
  -8   4   4   74.73    5.08
  -8   4   4   74.34    4.67
  -8   4   4   71.73    4.18
  -8   4   4   75.34    4.69
   8   4  -4   57.99    5.69
  -8  -4   4   74.19    4.80
  11   1  -3   46.72    3.20
 -11  -1   3   40.31    2.62
 -11  -1   3   41.65    6.19
 -11   1   3   41.58    2.81
 -11   1   3   36.55    2.47
 -11   1   3   45.34    3.04
  11  -1  -3   45.23    2.99
   7   5  -3   11.54    1.20
  -7   5   3   13.03    1.25
  -7   5   3   11.91    1.34
  -7   5   3   11.68    1.28
  -7   5   3   11.50    1.26
   7   5  -3   14.13    1.34
   7   5  -3   10.21    1.27
   7   5  -3   10.87    1.24
  -2   5   5  272.07   16.09
  -2   5   5  224.55   14.81
  -2   5   5  275.19   16.50
  -2  -5   5  268.20   17.35
  -2   5   5  237.01   19.51
  -2   5   5  268.75   18.09
  -2   4   6   51.16    3.44
  -2   4   6   60.00    3.99
  -2  -4   6   55.44    3.47
  -2   4   6   59.61    4.68
  -2   4   6   52.42    3.51
  -2   4   6   48.69    3.03
  -1   5   5   15.59    1.38
  -1   5   5   13.71    1.41
  -1   5   5   15.45    1.43
  -1   5   5   10.64    1.44
  -1  -5   5   14.85    1.42
  -1   5   5   14.53    2.05
  -7   5  -1    5.03    0.96
   7   5   1    6.01    1.62
   7   5   1    3.97    1.36
   7  -5   1    4.81    0.99
  -7   5  -1    4.87    0.88
   7   5   1    4.94    1.01
   7   5   1    4.01    0.95
  -3  -4   6   80.80    5.12
  -3   4   6   69.32    4.17
  -3   4   6   90.75    5.64
  -3   4   6   82.86    5.22
  -3   4   6   74.12    5.56
  -3   4   6   74.61    4.24
  -3   4   6   73.95    4.40
   6   5  -4  261.19   14.76
  -6  -5   4  283.65   17.79
   6   5  -4  268.94   17.17
  -6  -5   4  244.96   14.63
  -6   5   4  267.83   14.94
  -6   5   4  261.58   16.85
  -6   5   4  281.97   16.65
  -6   5   4  292.46   17.75
  -6   5   4  285.16   17.13
  -6   5   4  279.41   17.00
   5   6  -2  151.51    9.26
   5   6  -2  147.55    8.53
  -5  -6   2  149.99    8.95
  -5   6   2  140.31    8.36
  -5   6   2  120.77    7.13
   5   6  -2  114.80    9.11
  -5   6   2  133.69   10.78
   5   6  -2  154.88    9.44
  -5   6   2  157.59    9.79
   5   6  -2  154.61    9.21
  -5   6   2  164.14    9.68
   1  -1   7  217.46   12.04
   1  -1   7  194.70   10.94
   1   1   7  197.82   12.04
   1  -1   7  224.18   13.42
   1   1   7  240.31   13.35
   1   1   7  212.24   15.95
   5   5   3  204.41   13.76
   5   5   3  243.45   14.58
   5   5   3  216.50   14.39
   5   5   3  236.07   16.07
   5   5   3  173.90   10.70
  -5   5  -3  226.16   14.43
   5  -5   3  231.80   14.56
 -10   0   5   -0.37    0.86
 -10   0   5    0.33    0.86
  10   0  -5    0.14    0.75
 -10   0   5   -0.09    0.94
  -3   5   5   21.53    4.65
  -3  -5   5   17.99    1.51
  -3   5   5   20.74    1.76
  -3   5   5   21.66    1.64
  -3   5   5   16.53    1.30
  -3   5   5   17.97    1.36
  -3   5   5   18.97    1.55
  -1   4   6    4.23    1.37
  -1   4   6    6.02    1.58
  -1   4   6    5.02    1.32
  -1  -4   6    5.53    0.97
  -1  -4   6    3.72    0.67
  -1   4   6    3.86    0.99
  -1   4   6    4.24    1.05
  -6   1   7  326.31   18.80
  -6   1   7  324.76   21.54
  -6  -1   7  350.35   19.54
  -6   1   7  283.67   18.64
  -6   1   7  321.50   18.67
  -6  -1   7  279.36   22.90
  -6  -1   7  305.57   20.67
  -6   1   7  270.56   23.79
  -6  -1   7  323.61   20.90
  10   0   2  236.40   15.77
   9   4   0  772.14   51.97
   9  -4   0  798.24   55.01
  -9   4   0  767.45   53.02
  -9   4   0  779.71   56.69
   9   4   0  730.49   47.31
   9   4   0  658.91   41.79
  -9   4   0  728.19   45.20
  11   1   0   10.62    1.35
  11  -1   0   10.88    1.21
  11   1   0    8.88    1.06
   9   1   3   31.19    2.16
   9   1   3   24.63    2.06
   9  -1   3   29.61    2.17
   9  -1   3   30.57    1.98
  10   3  -3    0.54    0.85
 -10   3   3    0.30    1.01
 -10   3   3    0.69    0.98
 -10   3   3    0.52    0.94
 -10   3   3    0.42    0.70
  10   3   0   29.31    2.18
  10   3   0   29.67    2.22
 -10   3   0   28.95    2.25
  10   3   0   28.97    2.12
 -10   3   0   22.56    1.65
  10  -3   0   34.27    2.42
   8   0   4  103.26    5.91
   8   0   4  101.90    6.47
   8   0   4   91.47    5.68
  -4   6   3  617.79   37.31
  -4   6   3  715.00   41.43
   4   6  -3  704.24   41.58
  -4   6   3  638.85   38.32
  -4   6   3  719.38   45.57
  -4   6   3  642.29   39.21
   4   6  -3  719.72   40.92
  -4  -6   3  736.03   43.13
   4   6  -3  501.84   51.57
  -8   2   6    7.10    1.05
  -8  -2   6    6.97    1.05
  -8  -2   6    6.04    1.01
  -8   2   6    8.43    1.17
  -8  -2   6    6.63    1.19
  -8   2   6    8.71    1.19
   8   2  -6    8.13    1.07
  -8   2   6    6.37    1.13
   0   5   5  333.33   20.47
   0  -5   5  248.23   15.41
   0   5   5  318.09   18.71
   0   5   5  277.19   19.11
   0   5   5  283.04   19.25
   0   5   5  326.90   20.55
   0  -5   5  339.51   22.31
   2   6   3   -0.22    1.16
  -2   6  -3    0.58    0.84
   2   6   3    1.26    1.02
   2   6   3    1.46    1.03
  -2   6  -3    0.48    0.86
   2   6   3    0.99    1.12
   2   6   3    1.28    0.97
   2  -6   3    0.82    0.87
   5   3   5  488.98   39.07
   5  -3   5  465.18   32.05
   5   3   5  502.58   29.16
   5   3   5  501.90   34.88
   5   3   5  481.07   28.35
   5  -3   5  510.80   30.69
   0   2   7   21.07    1.69
   0   2   7   18.28    1.59
   0   2   7   18.44    1.99
   0  -2   7   20.15    1.55
   0   2   7   21.10    1.75
   0   2   7   17.08    1.57
   0  -2   7   17.98    1.44
   0  -2   7   18.36    1.44
   0  -2   7   24.71    1.96
  -7   4   5    4.89    0.96
  -7   4   5    4.04    1.08
  -7  -4   5    4.75    0.93
   7   4  -5    4.99    0.91
   7   4  -5    4.60    1.01
  -7  -4   5    4.05    0.99
  -7  -4   5    2.33    0.73
  -7   4   5    4.08    0.82
  -7   4   5    3.94    0.97
  -7   4   5    3.90    0.71
  -5  -2   7    7.27    0.90
   5   2  -7    7.59    0.96
  -5  -2   7    7.50    1.05
  -5   2   7    7.17    1.03
  -5  -2   7    6.35    0.99
  -5   2   7    8.52    1.14
  -5   2   7    7.58    1.21
  -5   2   7    5.94    0.95
  -5  -2   7    5.28    0.86
  -5   2   7    6.94    1.05
 -11   2   2    5.96    0.92
  11   2  -2    6.07    1.07
  11  -2  -2    4.86    0.93
 -11  -2   2    9.09    1.81
 -11   2   2    5.17    0.94
  -9   4   3    0.21    0.85
  -9   4   3    0.92    1.07
   9   4  -3    1.46    1.00
   9   4  -3    0.53    1.02
  -9   4   3    0.67    0.91
  -9   4   3    1.75    0.94
  -4   4   6  129.26    8.57
  -4  -4   6  150.90   10.64
  -4   4   6  126.47    8.55
  -4   4   6  132.90    9.73
  -4   4   6  129.96   10.69
  -4   4   6  159.19   10.69
  -4   4   6  135.79   11.19
 -10   1   5    0.43    0.92
 -10   1   5    0.60    0.96
 -10  -1   5    0.41    0.77
  10   1  -5    0.99    0.86
 -10  -1   5    0.47    0.94
 -10   1   5    0.69    0.89
   8  -3   3  366.08   24.14
   8   3   3  353.71   25.65
   8   3   3  419.67   33.08
   8  -3   3  400.70   30.79
  10   1   2    4.31    0.99
  10  -1   2    3.01    0.97
   6   2   5   13.41    1.91
   6   2   5   15.51    1.37
   6  -2   5   15.43    1.39
   6  -2   5   18.71    1.51
   6  -2   5   18.29    1.71
   6   2   5   19.09    1.79
   6   2   5   20.83    1.90
  11  -2  -1  142.64   10.56
 -11  -2   1  127.62    8.67
 -11   2   1  140.39   10.19
  11   2  -1  122.42    9.27
  -5   6  -1   72.91    5.85
  -5   6  -1   68.20    4.63
   5  -6   1   61.71    4.27
   5   6   1   61.78    5.76
   5   6   1   69.85    5.29
   5   6   1   66.90    5.90
   5   6   1   51.82    4.52
  -5   6  -1   72.20    5.00
   0  -4   6    0.58    0.71
   0  -4   6    0.80    0.90
   0   4   6    1.11    0.97
   0   4   6    0.99    1.18
   8   1   4    3.23    1.28
   8  -1   4    3.88    0.75
   8  -1   4    4.51    1.06
   8   1   4    4.01    0.71
   8   1   4    4.30    1.10
   8   1   4    2.84    0.82
   8  -1   4    3.91    1.00
   4   6   2  207.77   17.73
   4   6   2  192.43   13.75
  -4   6  -2  233.08   16.05
  -4   6  -2  194.37   12.83
   4   6   2  232.06   18.23
   4   6   2  223.50   18.37
   4  -6   2  220.32   15.43
   4   6   2  221.76   15.90
  -4   6  -2  237.03   15.50
  -4   5   5    0.87    0.94
  -4   5   5    0.61    0.91
  -4   5   5    0.33    0.78
  -4   5   5    0.21    0.65
  -4   5   5    0.57    0.78
  -4  -5   5    0.92    0.94
  -4   5   5    0.60    1.70
  -9   0   6  376.85   27.63
  -9   0   6  345.18   31.87
  -9   0   6  381.13   26.83
   9   3   2    1.86    1.02
  -9   3  -2    1.32    0.97
   9  -3   2    1.68    0.93
  -9   3  -2    1.94    0.76
   9   3   2    0.62    0.78
   9  -3   2    2.40    0.78
   9   3   2    0.99    1.12
  -9   3  -2    1.71    0.78
   9   3   2    1.55    0.71
   8   5  -1  215.94   15.53
  -8   5   1  246.78   17.60
  -8   5   1  238.24   16.95
  -8   5   1  252.77   17.05
  -8   5   1  230.18   16.47
   8   5  -1  238.32   16.14
   8   5  -1  224.46   15.83
  -8   4  -2   50.36    3.61
  -8   4  -2   42.98    3.09
   8  -4   2   52.22    3.82
   8   4   2   42.61    3.36
   8   4   2   46.10    4.05
   8   4   2   45.76    3.43
  -8   4  -2   38.35    3.07
 -11   0   4   46.55    3.37
 -11   0   4   39.87    2.92
 -11   0   4   41.42    3.30
  11   0  -4   46.20    3.46
  -7   3   6   28.10    2.27
  -7   3   6   23.09    1.84
  -7  -3   6   25.31    2.03
  -7   3   6   25.25    1.91
  -7  -3   6   20.68    1.71
  -7  -3   6   25.16    2.02
   7   3  -6   24.36    2.02
  -7   3   6   25.92    2.01
  -7  -3   6   22.31    1.94
  -7   3   6   23.89    1.97
   7   4   3   28.44    3.38
  -7   4  -3   34.89    2.74
   7  -4   3   32.95    2.65
   7   4   3   29.15    2.28
   7   4   3   30.64    2.71
   7   4   3   27.89    2.34
   4   2   6  216.09   16.12
   4  -2   6  212.60   14.04
   4  -2   6  174.54   12.02
   4  -2   6  182.12   14.33
   4   2   6  198.21   13.34
   4   2   6  191.72   12.52
   4   2   6  144.37   11.97
   4   2   6  199.63   14.51
   2   0   7    0.18    0.85
   2   0   7    0.23    1.04
   2   0   7   -0.02    0.78
  -8   5   2    0.40    1.04
  -8   5   2    0.30    0.87
  -8   5   2    0.06    0.96
  -8   5   2    0.08    0.89
   8   5  -2    0.61    0.99
   8   5  -2    0.12    0.99
   8   5  -2    0.54    0.86
  -7   0   7    0.20    0.88
  -7   0   7   -0.32    0.89
  -7   0   7   -0.64    1.04
  -7   0   7    0.38    0.93
   1   5   5    6.10    1.32
   1   5   5    6.70    1.09
   1   5   5    6.58    1.52
  -1   5  -5    6.30    1.00
   1  -5   5    6.74    1.02
   1  -5   5    6.48    1.00
   1   5   5    5.98    1.12
 -11   2   3   77.22    5.37
 -11   2   3   78.45    5.74
 -11  -2   3   78.77    5.97
  11   2  -3   84.76    6.14
 -11   2   3   63.33    4.35
  11  -2  -3   71.41    4.95
   9   1  -6   95.66    6.60
  -9   1   6   98.49    6.74
  -9   1   6   93.70    6.45
  -9   1   6  106.16    7.71
  -9   1   6   95.50    6.98
  -9  -1   6   96.33    7.12
  -9  -1   6   99.32    7.21
  -9  -1   6  103.94    7.85
   3   3   6  121.50    8.29
   3   3   6  122.07    8.31
   3   3   6  122.11    8.64
   3  -3   6  119.79    7.83
   3  -3   6  122.45    8.52
   3   3   6  128.45    8.95
   3   3   6  114.02    8.64
   6   6  -1  126.30    8.42
   6   6  -1  115.21    8.18
   6   6  -1  117.96    8.64
   6   6  -1  104.39    7.09
  -6   6   1  123.06    9.07
  -6   6   1  123.32    8.24
  -6   6   1  119.30    8.82
  11   1  -4   32.68    2.63
 -11   1   4   31.39    2.45
 -11   1   4   32.03    2.55
  11  -1  -4   27.30    2.13
 -11   1   4   28.48    2.24
 -11  -1   4   33.24    2.60
   7   3   4   29.51    2.35
   7  -3   4   33.22    2.63
   7   3   4   28.28    2.62
   7  -3   4   31.92    2.33
   7   3   4   29.63    2.61
   7   3   4   29.37    2.10
   5   0   6 1015.41   65.79
   5   0   6 1010.18   65.63
   5   0   6 1042.02   72.36
   0   7   0    0.25    0.96
   0   7   0    0.04    0.88
   0   7   0    0.22    0.97
   0   7   0    0.43    0.94
  -5   4   6    6.35    0.96
  -5   4   6    5.43    1.07
  -5  -4   6    6.25    0.99
  -5   4   6    5.04    0.96
   5   4  -6    6.47    0.95
  -5   4   6    4.50    0.79
  -5   4   6    6.18    1.15
  -5   4   6    5.09    1.02
  -8   5   0    6.90    1.11
   8   5   0    9.84    1.30
   8   5   0   12.35    1.74
  -8   5   0    9.94    1.20
  -8   5   0    9.93    1.21
   8   5   0    8.53    0.94
   8  -5   0    7.07    0.98
   2  -1   7   28.64    2.18
   2   1   7   27.24    2.17
   2  -1   7   27.27    2.10
   2   1   7   19.03    1.95
   2  -1   7   23.92    1.78
   2   1   7   24.58    1.83
   1   2   7  125.93    8.16
   1   2   7  147.51    9.91
   1  -2   7  126.53    8.37
   1   2   7  138.90    8.94
   1  -2   7  114.67    7.48
   1   2   7  116.21    8.07
   1  -2   7  124.77    8.14
   1  -2   7  146.13    9.61
   4   4   5  266.70   17.87
   4   4   5  269.06   21.27
   4  -4   5  274.20   20.10
   4  -4   5  275.09   18.44
   4   4   5  234.77   17.15
   4   4   5  285.68   20.90
   4   4   5  276.84   18.37
   4   5   4   11.62    1.90
   4   5   4   11.23    1.43
   4   5   4    8.11    1.41
   4   5   4   11.74    1.18
   4  -5   4   12.15    1.31
   4   5   4   10.42    1.30
   5   6  -3  100.94    8.12
   5   6  -3  130.11    9.48
   5   6  -3  135.02    9.06
   5   6  -3  109.01    7.19
  -5   6   3  137.70    9.47
  -5   6   3  132.07    9.04
  -5   6   3  128.29    8.77
  -5   6   3  140.00    9.52
  -5   6   3  129.58    9.17
  -5  -6   3  141.43    9.54
   5   6  -3  137.00    9.26
  11   0   1    0.15    1.00
  -1   6   4  129.18    8.71
  -1   6   4  141.08    9.44
  -1   6   4  131.52   10.23
  -1   6   4  145.18   10.38
   1   6  -4  172.18   11.64
  -1  -6   4  153.54   11.10
  -1   6   4  163.31   11.21
  -1   6   4  150.34   10.59
   1   7   0    9.20    1.09
  -1   7   0    9.34    1.25
  -1   7   0    9.12    1.06
  -1   7   0   11.84    1.29
   1   7   0   11.95    1.40
   1   7   0    9.63    1.20
   1   7   0    9.60    1.28
  -1   7   0   10.82    1.31
  -1   7   0    8.76    1.04
  -6  -2   7   -0.21    0.95
  -6  -2   7   -0.52    0.93
  -6   2   7    0.13    0.88
  -6  -2   7   -0.11    0.69
   6   2  -7    0.20    0.77
  -6   2   7    1.15    0.93
  -6   2   7    0.31    0.87
  -6  -2   7    0.08    0.88
  -6   2   7    0.24    0.88
  -6  -2   7    0.38    0.74
  -6   2   7   -0.18    1.00
  -2   6   4   68.83    5.37
  -2   6   4   74.56    5.18
   2   6  -4   84.81    6.06
  -2   6   4   79.26    7.71
  -2   6   4   73.68   25.49
  -2  -6   4   71.90    5.08
  -7  -1   7   29.38    2.47
  -7  -1   7   32.37    2.49
  -7   1   7   28.19    2.28
  -7   1   7   31.80    2.51
  -7  -1   7   30.15    2.53
  -7   1   7   32.50    2.61
  -7  -1   7   29.96    2.51
  -7   1   7   30.15    2.44
  -7   1   7   29.38    2.23
  -9   3   5   32.14    2.70
   9   3  -5   32.88    2.60
  -9   3   5   27.99    2.12
  -9   3   5   32.24    2.70
  -9   3   5   30.81    2.39
  -9   3   5   29.73    2.23
  -9  -3   5   30.83    2.57
  11  -2   0  609.22   48.17
 -11   2   0  610.88   48.41
  11   2   0  577.76   45.96
  11   2   0  449.12   34.33
  -6   6   0  357.91   23.87
  -6   6   0  408.16   27.90
  -6   6   0  384.71   26.93
   6   6   0  403.39   28.29
   6   6   0  402.56   28.44
   6   6   0  388.37   33.90
   9  -2   3   72.92    5.58
  -9   2  -3   77.81    5.58
   9  -2   3   87.44    6.22
   9   2   3  107.53   10.06
   9   2   3   77.31    6.41
   9  -2   3   98.89    7.52
   9   2   3   74.87    5.41
   1   4   6  467.44   31.33
   1   4   6  506.40   34.44
   1   4   6  470.52   35.16
   1  -4   6  507.05   33.96
   1  -4   6  470.88   31.52
   1   4   6  566.40   42.61
   1   4   6  454.26   30.56
   1   4   6  486.39   32.94
   3  -6   3  174.56   12.44
  -3   6  -3  168.81   11.57
   3   6   3  145.81   10.84
  -3   6  -3  170.06   12.35
   3   6   3  196.64   19.89
   3   6   3  188.47   14.23
   3   6   3  174.79   12.91
   3   6   3  176.47   12.58
   7   0   5   -0.37    0.73
   7   0   5   -0.14    0.89
   7   0   5   -0.57    0.66
   7   0   5    0.88    1.00
  -5   5   5  211.28   14.29
  -5   5   5  235.81   16.31
  -5   5   5  233.50   16.19
  -5  -5   5  230.18   16.08
   5   5  -5  230.79   15.87
  -5   5   5  214.45   14.73
  -5   5   5  232.49   15.68
  -5   5   5  223.67   16.07
   9   4   1  195.59   14.78
  -9   4  -1  149.93   11.58
   9   4   1  191.35   15.36
   9   4   1  166.44   12.37
   9   4   1  155.94   10.83
  -9   4  -1  203.49   14.46
  -9   4  -1  196.68   13.53
   9  -4   1  200.67   14.24
  -2  -3   7    0.52    0.82
  -2   3   7   -0.21    0.74
  -2   3   7    0.39    0.85
  -2   3   7    0.75    1.10
  -2   3   7    0.26    0.73
  -3   3   7    2.18    0.77
  -3   3   7    1.93    0.83
  -3  -3   7    2.09    0.85
  -3  -3   7    1.96    0.76
  -3   3   7    2.53    0.93
  -3   3   7    1.39    0.73
  -3   3   7    2.08    1.18
  -6   6   2  113.90    7.80
   6   6  -2  105.03    7.31
   6   6  -2  115.61    7.94
  -6   6   2  126.96    8.92
   6   6  -2   90.59    6.89
  -6   6   2  115.62    8.48
  -6   6   2   87.35    6.09
   6   6  -2  111.37    8.44
  -6   6   2  108.11    7.78
   6   6  -2  100.34    7.48
   0   7   1    5.76    1.07
   0   7   1    6.61    1.26
   0   7   1    6.36    1.14
   0   7  -1    6.86    1.18
   0   7   1    4.50    0.79
   0   7   1    6.20    1.13
   0   7  -1    6.38    1.18
   0   7  -1    4.89    1.02
   6   4   4   21.16    1.69
   6   4   4   22.16    1.86
   6   4   4   18.40    1.61
   6  -4   4   22.89    2.05
   6   4   4   23.79    2.38
   6  -4   4   21.00    1.77
   6   4   4   26.41    2.17
   1   7  -1    4.92    1.03
  -1   7   1    4.47    1.01
  -1   7   1    3.44    0.86
  -1   7   1    4.36    1.14
  -1   7   1    4.00    0.99
  -1   7   1    3.27    1.01
   1   7  -1    4.15    0.96
   1   7  -1    4.17    1.08
   1   7  -1    3.67    0.80
   5  -1   6    4.30    0.87
   5   1   6    3.51    0.86
   5   1   6    3.21    0.89
   5   1   6    3.56    1.59
   5  -1   6    3.41    0.81
   5  -1   6    3.52    1.02
   5   1   6    3.83    1.10
   0   6   4   81.19    5.75
   0  -6   4   81.97    5.82
   0   6   4   73.11    5.16
   0   6   4   74.60    5.48
   0   6   4   77.70    5.93
   0   6   4   74.03    5.20
   0   6   4   61.06    6.19
   0   6  -4   76.44    5.55
   7   5  -4  123.34    8.85
  -7  -5   4  121.85    8.32
  -7  -5   4  102.03    7.20
   7   5  -4  100.20    6.97
  -7   5   4  131.90    9.36
  -7   5   4  123.66    8.71
  -7   5   4  116.35    8.28
   7   5  -4  126.66    8.54
  -7   5   4  116.53    8.48
  10   3  -4  288.98   21.02
 -10   3   4  261.63   18.45
 -10   3   4  262.61   18.66
 -10  -3   4  271.68   19.64
 -10   3   4  225.96   15.26
 -10   3   4  223.54   14.67
 -10   3   4  267.45   18.70
 -10   3  -1  145.89   11.06
  10   3   1  169.98   12.24
  10   3   1  182.60   14.03
 -10   3  -1  151.34   10.76
  10   3   1  150.16   11.66
 -10   3  -1  163.21   11.71
  10  -3   1  180.98   13.00
  -3   6   4  199.77   13.29
  -3   6   4  257.48   18.20
  -3   6   4  267.91   19.10
   3   6  -4  264.24   19.52
  -3  -6   4  271.84   19.27
  -3   6   4  280.12   20.22
  -3   6   4  248.83   17.01
  -3   6   4  254.20   17.97
 -10   2   5    0.58    0.69
  10   2  -5    0.48    0.99
 -10  -2   5    1.53    1.09
 -10   2   5    0.77    1.12
 -10   2   5    1.46    0.97
 -10   2   5    0.09    0.88
  11   1   1    0.96    0.92
  11  -1   1    0.30    0.95
  10  -2   2   14.06    1.49
  10   2   2   13.17    1.27
   2   7   0   91.57    6.84
   2   7   0   99.96    7.46
  -2   7   0   98.84    7.32
   2   7   0   93.51    6.89
  -2   7   0  101.13    7.21
   2   7   0   90.27    6.20
  -2   7   0   98.03    6.77
  -2   7   0   84.22    5.98
  -1   7  -1   89.13    6.38
  -1   7  -1   91.30    6.43
   1   7   1   84.51    6.08
   1   7   1   86.77    6.70
  -1   7  -1   76.06    5.27
   1   7   1   84.48    5.97
   1   7   1   86.44    6.29
  -1   3   7  129.11    8.54
  -1  -3   7  134.68    8.89
  -1   3   7  123.88    9.01
  -1   3   7  142.62    9.84
  -1   3   7  152.37   11.36
  -1  -3   7  149.95   10.00
  -1   3   7  135.05    9.30
   8   5  -3    3.29    0.97
  -8   5   3    4.20    1.03
  -8   5   3    3.99    0.98
  -8  -5   3    4.07    1.40
   8   5  -3    3.08    0.82
   8   5  -3    5.68    1.09
  -8   5   3    3.65    0.93
  -8   5   3    4.30    1.20
   8   5  -3    4.78    1.05
  -4   3   7  154.03   12.25
  -4   3   7  207.72   14.39
  -4   3   7  170.38   11.79
  -4  -3   7  203.81   13.98
  -4   3   7  171.96   11.37
  -4  -3   7  159.44   10.75
  -4   3   7  171.73   11.67
  -4   3   7  193.32   13.52
   4   3  -7  210.16   14.24
   8   2   4    2.83    1.07
   8  -2   4    3.39    0.73
   8   2   4    2.26    1.34
   8  -2   4    3.31    1.04
   8  -2   4    1.90    0.79
   8   2   4    3.34    1.04
   8   2   4    2.39    0.64
  -7   5  -2   -0.26    0.92
   7   5   2    0.29    0.93
   7  -5   2    0.75    0.98
   7   5   2    0.47    0.96
   7   5   2   -0.29    1.26
  -7   5  -2    0.09    0.60
   7  -1   5  440.50   30.86
   7   1   5  438.51   32.81
   7   1   5  374.69   28.32
   7   1   5  440.56   32.57
   7  -1   5  451.82   31.06
   7  -1   5  438.20   29.96
   7   1   5  440.84   29.62
   2   7  -1    2.44    0.99
   2   7  -1    2.99    0.99
  -2   7   1    3.34    0.92
  -2   7   1    2.47    0.91
  -2   7   1    2.87    0.88
   2   7  -1    3.20    1.17
  -2   7   1    2.56    0.99
   2   7  -1    2.55    0.76
  -2   7   1    3.30    1.12
  -9   4   4    0.55    0.78
  -9   4   4    0.66    1.16
  -9   4   4    0.72    0.82
  -9   4   4    1.00    1.02
  -9  -4   4    0.57    1.34
   9   4  -4    0.99    0.99
   9   4  -4    1.43    0.92
   2   5   5  139.64   10.02
   2  -5   5  139.39   10.35
   2   5   5  137.80   10.23
   2   5   5  132.19    9.45
   2   5   5  121.87    8.91
  -2   5  -5  142.31    9.56
   2  -5   5  127.16    9.07
   6   5   3   19.32    2.06
   6  -5   3   20.10    1.81
  -6   5  -3   20.48    1.77
   6   5   3   21.77    1.98
   6   5   3   21.26    1.92
 -12   0   2  166.57   11.87
  12   0  -2  167.70   12.21
 -12   0   2  146.84   11.36
  -8   4   5   20.79    1.88
  -8   4   5   19.20    1.54
  -8   4   5   20.40    1.76
   8   4  -5   19.79    1.62
  -8   4   5   21.18    1.92
   8   4  -5   21.44    1.88
  -8   4   5   15.89    1.37
  -8  -4   5   19.13    1.73
  -1   6  -4  328.45   23.02
   1   6   4  369.98   26.64
  -1   6  -4  412.90   28.85
   1  -6   4  404.88   30.84
   1   6   4  396.16   27.27
   1   6   4  418.97   31.03
   1   6   4  414.54   30.59
   1   6   4  377.30   27.41
   5   6   2    3.38    1.08
  -5   6  -2    2.96    1.00
   5   6   2    3.07    0.97
   5   6   2    5.18    1.35
   5   6   2    3.53    1.22
   5  -6   2    3.80    0.92
  -5   6  -2    3.36    0.72
   6   4  -6   16.25    1.51
  -6   4   6   17.89    1.68
  -6   4   6   17.07    1.63
  -6   4   6   18.07    1.56
  -6  -4   6   18.39    1.66
  -6   4   6   16.90    1.51
  -9  -2   6   13.63    1.27
  -9  -2   6   16.06    1.62
  -9   2   6   15.74    1.44
  -9  -2   6   15.39    1.53
   9   2  -6   19.27    1.66
  -9   2   6   19.68    1.83
  -9   2   6   16.24    1.57
  -9   2   6   18.75    1.67
  -4   6   4  425.33   31.21
   4   6  -4  424.64   32.03
  -4   6   4  373.41   25.89
  -4   6   4  410.48   30.55
  -4  -6   4  404.80   29.37
   4   6  -4  373.67   26.35
  -4   6   4  385.92   27.20
  -4   6   4  374.27   29.40
 -10   4   2    3.49    1.11
  10   4  -2    1.88    1.05
 -10   4   2    2.91    0.83
 -10   4   2    3.43    0.99
 -10   4   2    3.81    1.04
  10   4  -2    2.93    1.00
  10   4  -1   56.22    4.13
 -10   4   1   55.56    4.41
 -10   4   1   63.13    4.57
 -10   4   1   63.90    4.74
  10   4  -1   67.41    4.90
 -10   4   1   60.32    4.72
  10  -4  -1   57.42    4.15
 -12   0   1   -0.27    0.81
  12   0  -1   -0.18    0.80
 -12   0   1   -0.09    0.99
 -11  -2   4    1.01    1.19
 -11   2   4    0.86    0.72
 -11   2   4    1.41    0.94
  11   2  -4    1.15    0.93
 -11   2   4    1.43    1.01
 -11   2   4    0.97    0.87
   2   7   1   43.90    3.45
   2   7   1   39.96    3.32
  -2   7  -1   38.26    3.08
   2   7   1   40.16    3.10
   2   7   1   36.70    3.01
  -2   7  -1   39.19    3.14
  -2   7  -1   40.07    3.05
   8   3  -6    7.44    1.09
  -8   3   6    4.69    0.86
  -8  -3   6    5.81    0.90
  -8   3   6    6.78    1.14
  -8   3   6    7.00    1.07
  -8  -3   6    5.34    0.96
  -8   3   6    6.26    1.11
   3   0   7    1.25    0.84
   3   0   7    0.76    0.98
   3   0   7    0.77    0.78
  -6   6  -1  127.52    9.33
   6   6   1  121.71    9.21
   6   6   1  118.29    8.58
   6   6   1  152.21   11.84
   6  -6   1  121.59    8.48
   6   6   1  147.40   11.51
  -6   6  -1  138.86   10.55
   0   3   7  231.23   16.06
   0   3   7  216.94   14.86
   0   3   7  214.94   14.51
   0  -3   7  208.10   14.30
   0  -3   7  236.75   16.53
   0   3   7  222.01   15.42
   0   3   7  224.43   18.56
   0  -3   7  238.59   16.67
   8   5   1  383.11   30.04
   8   5   1  387.46   29.36
   8  -5   1  393.96   28.92
  -8   5  -1  382.08   27.91
  -8   5  -1  355.84   27.14
  -8   5  -1  326.15   22.77
  -5   3   7  113.55    8.25
  -5   3   7  103.07    7.60
  -5   3   7  113.99    7.94
  -5   3   7  101.09    7.26
  -5  -3   7   94.62    6.68
   5   3  -7  123.22    8.75
  -5  -3   7  122.06    8.53
  -5   3   7  107.01    7.67
 -11   3   2   14.08    1.37
 -11   3   2   13.18    1.44
  11   3  -2   13.84    1.53
 -11   3   2   14.71    1.60
  11   3  -2   15.95    1.63
  11  -3  -2   14.75    1.38
  -8   0   7   -0.68    0.82
  -8   0   7   -0.24    0.91
  -8   0   7   -0.76    0.92
  -8   0   7    0.69    1.03
   2   2   7   93.47    6.49
   2  -2   7   87.88    6.25
   2   2   7   86.94    6.11
   2   2   7   96.29    7.23
   2   2   7   90.05    6.24
   2   2   7   87.95    6.82
   2  -2   7   84.18    5.89
   2  -2   7   85.64    5.95
   2  -2   7   88.41    6.50
   2  -4   6  153.51   11.77
   2   4   6  156.77   11.74
   2  -4   6  148.94   10.26
   2   4   6  167.27   11.98
   2  -4   6  159.59   11.20
   2   4   6  123.73    9.22
   2   4   6  143.96   12.39
   2   4   6  146.13   10.36
  12  -1  -2  186.17   13.84
  12   1  -2  195.85   14.82
 -12  -1   2  190.46   14.29
 -12  -1   2  161.57   11.51
 -12   1   2  184.55   13.48
  -1   7   2   71.62    5.41
  -1   7   2   60.20    4.38
  -1  -7   2   66.97    4.74
   1   7  -2   76.24    5.50
  -1   7   2   71.32    5.15
   1   7  -2   75.30    5.60
  -1   7   2   74.51    5.48
  -1   7   2   73.16    5.41
   1   7  -2   67.11    4.74
   3   7   0  148.73   11.07
   3   7   0  147.93   11.26
  -3   7   0  153.81   11.24
  -3   7   0  134.54    9.41
  -3   7   0  148.09   10.64
   3   7   0  116.31    8.71
  -3   7   0  125.67    9.50
   3   7   0  141.95   10.08
  -7  -2   7   22.69    2.14
  -7  -2   7   26.17    2.39
   7   2  -7   26.28    2.06
  -7  -2   7   28.97    2.30
  -7   2   7   33.18    2.53
  -7   2   7   33.05    2.58
  -7   2   7   30.19    2.48
  -7  -2   7   26.20    2.19
  -7   2   7   33.73    2.66
  -7   2   7   30.29    2.44
  -3   7   1    1.60    1.06
  -3   7   1    3.42    0.91
  -3   7   1    2.88    0.99
   3   7  -1    2.47    0.78
   3   7  -1    2.99    1.11
   3   7  -1    2.70    0.96
   3   7  -1    3.67    1.18
   6   3   5  169.28   11.74
   6   3   5  190.44   15.46
   6  -3   5  177.26   13.59
   6   3   5  189.87   15.01
   6   3   5  186.08   13.32
   6  -3   5  196.59   13.51
 -11   3   1   77.64    6.07
 -11   3   1   69.51    5.09
  11   3  -1   72.84    6.35
  11  -3  -1   70.05    5.23
 -11   3   1   78.52    6.23
  11   3  -1   69.52    5.45
   0   7   2  275.65   20.93
   0  -7   2  277.91   18.97
   0   7   2  314.65   23.10
   0   7   2  317.37   23.30
   0   7   2  243.92   16.61
   0   7   2  298.55   21.03
   0   7  -2  279.34   19.49
   0   7  -2  252.00   18.17
 -12   0   3    0.25    0.91
 -12   0   3   -0.54    0.84
  12   0  -3   -0.79    0.88
  -6   5   5  280.88   19.89
  -6   5   5  214.79   15.82
  -6  -5   5  282.32   20.93
   6   5  -5  284.18   21.01
  -6   5   5  276.59   19.12
  -6   5   5  262.23   18.62
  -6   5   5  288.49   20.47
   6   6  -3   95.24    7.77
  -6   6   3  105.79    7.61
   6   6  -3  121.34    8.75
  -6   6   3  131.08    9.61
  -6   6   3  131.21    9.47
   6   6  -3  107.37    8.60
  -6   6   3  131.90    9.75
   6   6  -3  104.95    7.54
  -6   6   3  131.05    9.31
  12  -1  -1   89.53    7.07
 -12  -1   1   65.07    5.49
  12   1  -1   84.71    6.56
 -12  -1   1   87.12    6.43
 -12   1   1   71.07    5.43
 -11   0   5   -0.11    0.77
  11   0  -5   -0.11    0.73
 -11   0   5    0.10    0.84
 -11   0   5    0.34    0.89
  -2   7   2  100.85    7.52
  -2   7   2  102.11    7.66
  -2   7   2   79.35    6.13
  -2   7   2   99.31    7.17
   2   7  -2   89.62    6.23
  -2  -7   2   89.77    6.27
   2   7  -2   93.47    6.94
   2   7  -2   86.22    6.22
  -2   7   2   88.54    6.17
   5  -2   6   17.04    1.50
   5   2   6   21.28    2.26
   5   2   6   20.29    1.91
   5  -2   6   23.10    1.92
   5   2   6   23.69    2.13
   5   2   6   23.79    1.92
   5  -2   6   22.40    1.80
   3   1   7  284.24   19.34
   3  -1   7  268.41   18.45
   3  -1   7  212.32   14.76
   3  -1   7  302.99   21.10
   3   1   7  305.60   20.90
   4  -3   6  218.30   15.50
   4  -3   6  221.40   15.26
   4   3   6  217.38   15.27
   4   3   6  209.82   16.84
   4   3   6  224.71   16.46
   4   3   6  225.84   16.10
   4  -6   3  123.61    9.27
   4   6   3  125.74    9.41
   4   6   3   95.93    7.53
   4   6   3  131.41   10.27
  -4   6  -3  124.49    9.08
   4   6   3  119.09    9.07
  -3   0   8  169.64   11.47
  -3   0   8  194.92   13.67
  -3   0   8  126.00   11.09
  -3   0   8  198.01   14.99
  -8  -1   7    8.78    1.14
  -8  -1   7    7.67    1.05
  -8   1   7    8.33    1.17
  -8   1   7    7.40    1.10
  -8   1   7    7.06    0.95
  -8  -1   7    7.07    1.09
  -8   1   7    8.59    1.10
  -8   1   7    8.66    1.15
  -8  -1   7    7.10    1.08
 -10   0   6  117.43    9.23
 -10   0   6  138.74   10.32
  11  -2   1    0.07    0.89
  11   2   1    0.27    0.87
 -11   2  -1    0.36    0.99
  11   2   1    0.01    0.73
   1   7   2   44.20    3.50
  -1   7  -2   33.40    2.54
   1   7   2   42.76    3.25
  -1   7  -2   37.68    2.82
   1   7   2   40.00    3.15
   1  -7   2   37.32    2.74
   1   7   2   42.23    3.33
  -1   7  -2   41.75    3.25
   7   6  -1   -0.05    1.56
   7   6  -1    0.43    0.73
  -7   6   1    0.49    0.87
   7   6  -1    0.99    1.08
  -7   6   1    1.51    0.96
   7   6  -1    0.67    0.94
  -2   0   8   78.34    6.70
  -2   0   8   73.08    5.08
  -2   0   8   83.42    5.88
  -2   0   8   81.73    5.64
  -2   0   8   70.05    5.00
  10   0   3   -0.07    0.83
  12   1  -3   34.97    2.83
 -12   1   3   30.63    2.43
 -12   1   3   34.63    2.84
  12  -1  -3   34.84    2.76
 -12  -1   3   35.71    2.98
 -12  -1   3   30.78    2.36
 -10   4   3    4.85    1.01
  10   4  -3    5.80    1.03
 -10   4   3    4.49    0.84
  10   4  -3    3.88    1.00
 -10  -4   3    4.72    1.36
 -10   4   3    5.02    1.04
 -10   4   3    5.27    1.16
  10  -4   0   98.71    7.30
  10   4   0  103.77    7.69
 -10   4   0  122.24    9.02
  10   4   0   73.98    5.48
 -10   4   0   87.48    6.76
  10   4   0  100.36    7.28
 -10   4   0  104.89    7.55
 -11   3   3   62.88    4.76
 -11  -3   3   62.85    5.25
 -11   3   3   68.16    5.23
  11   3  -3   62.23    4.94
 -11   3   3   63.54    4.73
   2   6   4   34.90    2.81
   2  -6   4   43.01    3.33
   2   6   4   34.74    3.06
   2   6   4   42.13    3.41
  -2   6  -4   37.99    2.99
   2   6   4   34.49    2.89
  -2   6  -4   43.25    3.23
   2   6   4   39.56    3.64
   7   2   5   72.23    5.52
   7   2   5   68.28    5.39
   7   2   5   73.15    5.18
   7  -2   5   62.61    4.46
   7  -2   5   78.19    5.88
   7  -2   5   76.72    5.43
   7   2   5   64.28    5.90
  -4   0   8  125.77    8.79
  -4   0   8  112.64    7.72
  -4   0   8  100.00    7.29
  -4   0   8  101.88    8.71
   5  -5   4    1.43    0.86
   5   5   4    0.88    0.93
  -5   5  -4    0.49    0.88
   5   5   4    0.58    1.24
   5   5   4    0.58    1.01
   5   5   4    1.04    0.77
 -11  -1   5   -0.27    0.95
 -11   1   5    0.83    0.90
 -11   1   5    0.32    0.94
  11   1  -5    0.59    0.83
 -11   1   5    0.00    0.69
 -11   1   5    0.16    0.76
 -11  -1   5    0.28    0.75
  -9   5   1  207.40   15.41
   9   5  -1  258.38   19.73
  -9   5   1  249.11   17.87
   9   5  -1  187.46   13.72
   9   5  -1  206.80   16.20
  -9   5   1  242.46   18.66
  -9   5   1  235.92   17.67
   5   4   5    0.79    0.78
   5   4   5    0.20    0.73
   5   4   5    1.68    1.03
   5  -4   5    0.87    0.79
   5  -4   5    0.61    0.85
   5   4   5    0.36    1.31
   5   4   5    0.90    0.84
   3   7   1   65.01    5.07
  -3   7  -1   59.28    4.50
   3   7   1   62.07    4.81
   3   7   1   63.85    4.87
  -3   7  -1   65.29    5.03
   3   7   1   66.21    5.28
  -3   7  -1   67.32    5.11
   9   0   4   52.05    4.11
   9   0   4   45.66    3.31
   9   0   4   49.31    3.87
  -5   6   4   39.66    3.17
  -5   6   4   35.48    2.83
  -5   6   4   29.91    2.43
  -5  -6   4   37.88    3.02
   5   6  -4   38.04    3.19
  -5   6   4   37.23    3.16
  -5   6   4   37.20    2.92
   5   6  -4   36.34    2.86
  12   0   0  136.63   10.72
 -12   0   0  148.06   11.30
   9   5  -2    3.00    1.06
  -9   5   2    1.77    0.94
  -9   5   2    2.38    0.99
  -9   5   2    2.92    0.92
   9   5  -2    2.48    0.87
  -9   5   2    2.36    0.87
  -3   1   8   44.02    3.24
  -3  -1   8   40.76    3.94
  -3  -1   8   46.53    3.46
  -3   1   8   45.84    3.63
  -3  -1   8   51.94    3.92
  -3   1   8   53.03    4.51
  -3   1   8   51.82    3.77
  -3   1   8   50.43    3.77
   7   6  -2   20.72    1.91
   7   6  -2   24.13    1.98
  -7   6   2   24.24    2.08
  -7   6   2   22.64    2.14
   7   6  -2   24.52    2.09
  -7   6   2   22.33    1.95
  -7   6   2   20.99    1.85
  -7   6   2   25.09    2.20
   1  -3   7   10.71    1.13
   1   3   7    9.80    1.38
   1   3   7   11.18    1.21
   1   3   7   11.43    1.55
   1  -3   7    9.72    1.13
   1   3   7   10.36    1.13
   1  -3   7   11.16    1.22
   1   3   7   10.78    1.34
   3   7  -2    8.31    1.28
  -3  -7   2    7.33    0.94
  -3   7   2    9.16    1.27
  -3   7   2    6.50    1.01
   3   7  -2    7.44    1.16
  -3   7   2    7.84    1.15
   3   7  -2    7.46    0.90
   3   7  -2    8.67    1.25
 -10   1   6   47.67    3.69
 -10  -1   6   45.54    3.67
 -10  -1   6   53.67    4.55
 -10   1   6   54.67    4.57
  10   1  -6   47.95    3.64
 -10   1   6   48.31    4.05
   3   5   5   41.94    3.57
   3  -5   5   38.09    3.03
   3  -5   5   38.17    3.14
   3   5   5   38.77    3.13
   3   5   5   41.98    3.52
   3   5   5   35.73    3.02
  -8   4  -3    6.60    1.01
   8  -4   3    7.38    0.99
   8   4   3    8.02    1.23
   8   4   3    7.04    1.06
   8   4   3    4.79    1.31
   8  -4   3    8.37    1.21
   8   4   3    4.15    0.84
   6   3  -7    9.50    1.14
  -6   3   7    7.62    1.14
  -6  -3   7    7.24    0.93
  -6   3   7    8.38    1.08
  -6   3   7    9.67    1.22
  -6   3   7    7.20    1.06
  -6   3   7    8.55    1.14
  -6  -3   7    7.74    1.10
  -6  -3   7    7.16    0.98
  -7   6   0    4.79    0.91
   7   6   0    6.15    1.14
   7   6   0    5.66    1.26
  -7   6   0    6.29    1.06
  -1   0   8   -0.02    0.89
  -1   0   8    0.10    0.95
  -1   0   8   -0.11    0.68
  -1   0   8    0.60    0.69
  -2  -1   8   78.38    5.71
  -2   1   8   78.98    5.80
  -2   1   8   59.86    5.76
  -2  -1   8   83.71    7.20
  -2   1   8   75.33    5.40
  -2  -1   8   61.17    4.40
  -2   1   8   70.59    5.07
  -2   1   8   71.96    5.56
  -2  -1   8   74.80    5.32
  10  -1   3  100.21    7.56
  10  -1   3   98.95    8.58
  10   1   3   99.88    7.53
  11   3   0   25.59    2.17
  11  -3   0   26.62    2.35
  11   3   0   19.88    1.80
 -11   3   0   22.08    2.22
 -11   3   0   23.33    2.18
  11   3   0   22.69    2.10
   9   3   3   33.93    2.80
   9   3   3   41.03    3.64
  -9   3  -3   28.92    2.57
   9  -3   3   37.44    3.04
   9   3   3   33.63    2.97
  -9   3  -3   30.44    2.49
   9  -3   3   33.96    2.60
  -8   5   4   52.49    4.13
  -8   5   4   54.26    4.12
  -8  -5   4   51.98    4.05
  -8   5   4   50.66    4.19
  -8   5   4   54.15    4.15
   8   5  -4   55.20    4.59
   8   5  -4   50.07    3.79
   6   0   6    0.66    1.03
   6   0   6    1.12    0.80
   6   0   6    0.55    0.82
  -4  -1   8   11.19    1.06
  -4  -1   8   14.08    1.36
  -4  -1   8   14.70    1.44
  -4   1   8   11.87    1.33
  -4  -1   8   13.41    1.60
  -4   1   8   14.39    1.41
  -4   1   8   11.20    1.19
  -4   1   8   13.60    1.65
  -9   4  -2    8.31    1.11
   9   4   2    7.40    1.25
   9  -4   2   11.56    1.31
   9  -4   2    9.13    0.99
  -9   4  -2    9.79    1.12
   9   4   2   10.09    1.36
   9   4   2    6.33    1.04
  -9   4  -2    8.57    0.96
   9   4   2    9.45    1.15
  -4   7   1   55.20    4.29
   4   7  -1   69.46    6.20
   4   7  -1   54.46    4.12
   4   7  -1   67.06    5.13
   4   7  -1   59.12    4.65
  -4   7   1   62.10    4.90
  -4   7   1   68.47    5.54
  11   0   2   84.05    6.82
   7   4  -6   31.00    2.48
  -7  -4   6   32.55    2.62
  -7   4   6   33.43    2.61
  -7  -4   6   27.26    2.29
  -7   4   6   31.23    2.65
  -7   4   6   35.74    2.95
  -7  -4   6   31.13    2.41
  -7   4   6   33.13    2.66
  -2  -5   6   44.40    3.49
  -5   0   8   24.74    2.08
  -5   0   8   25.00    2.30
  -5   0   8   20.41    1.83
  -5   0   8   26.38    2.15
   4   7   0  159.88   12.00
  -4   7   0  161.08   11.86
  -4   7   0  167.48   14.27
   4   7   0  175.71   15.21
   4   7   0  164.42   14.01
   4   7   0  137.91   10.48
  -4   7   0  164.97   13.87
  -2   7  -2    4.37    0.89
   2   7   2    3.78    1.06
   2   7   2    3.61    1.10
   2   7   2    4.71    1.14
  -2   7  -2    4.04    0.85
  -2   7  -2    4.02    0.90
   2   7   2    4.37    1.07
   2  -7   2    3.20    0.76
   9  -1   4   20.08    1.88
   9   1   4   18.76    1.61
   9   1   4   18.33    1.79
   9   1   4   21.31    2.08
   9  -1   4   18.38    1.69
   9  -1   4   19.64    1.60
 -12   1   0   19.54    1.99
  12  -1   0   19.96    1.87
 -12  -1   0   14.00    1.57
  12   1   0   12.43    1.23
  12   1   0   16.90    1.76
  -3  -5   6   17.63    1.67
 -10   3   5   27.92    2.24
 -10   3   5   26.49    2.45
 -10  -3   5   25.83    2.50
  10   3  -5   32.48    2.68
 -10   3   5   23.80    2.03
 -10   3   5   29.85    2.53
  12  -2  -2   43.18    3.46
  12   2  -2   41.41    3.44
 -12   2   2   46.50    3.71
 -12  -2   2   42.91    3.54
  -1  -5   6    7.46    1.05
  -1   5   6    6.45    1.00
  -1   5   6    5.27    1.25
  -1  -5   6    4.54    0.86
 -10   3  -2  100.98    7.32
 -10   3  -2   94.00    7.72
  10   3   2  112.66    9.67
 -10   3  -2   93.04    6.79
  10   3   2   92.87    7.03
  10  -3   2  109.38    7.69
  10   3   2   87.55    6.45
  10   3   2  107.77    7.77
  10  -3   2  125.62    9.78
  -1   1   8   33.38    3.19
  -1  -1   8   32.70    2.45
  -1   1   8   32.41    2.50
  -1  -1   8   39.37    3.22
  -1  -1   8   37.77    2.85
  -1   1   8   38.98    2.99
  -1  -1   8   34.59    2.61
  -1   1   8   34.58    2.57
  -9   5   0    1.56    0.99
   9   5   0    2.28    1.11
   9   5   0    1.61    0.72
   9  -5   0    1.33    0.77
  -9   5   0    2.65    0.88
  -9   5   0    0.90    0.83
   9   5   0    1.36    0.99
 -12   0   4   10.34    1.30
 -12   0   4    8.58    1.15
  12   0  -4   10.20    1.20
   8   3   4   15.86    1.93
   8  -3   4   18.56    1.84
   8  -3   4   18.04    1.56
   8   3   4   15.49    1.85
   8   3   4   16.28    1.55
   6  -1   6   19.48    1.65
   6  -1   6   17.34    1.70
   6   1   6   14.11    1.43
   6   1   6   21.16    1.76
   6  -1   6   15.93    1.44
   6   1   6   17.09    1.73
   3   4   6   56.34    4.23
   3  -4   6   55.19    4.41
   3   4   6   56.94    4.45
   3   4   6   59.15    4.91
   3  -4   6   56.06    4.33
   3   4   6   56.15    4.75
  12   2  -1   54.58    4.41
  12  -2  -1   49.87    4.04
 -12  -2   1   50.69    4.38
 -12   2   1   59.32    4.89
 -12  -2   1   48.12    3.56
  12   2  -1   47.23    4.10
  11   1   2   17.48    1.66
  11  -1   2   16.79    1.70
   7   4   4    1.34    1.09
   7   4   4    1.96    0.66
   7   4   4    0.88    0.73
   7  -4   4    1.89    0.79
   7   4   4    1.61    1.49
   7  -4   4    2.05    0.88
   7   4   4    1.63    0.90
  -5  -1   8    1.58    1.01
  -5   1   8    2.65    0.91
  -5   1   8    2.03    0.80
  -5  -1   8    1.87    0.83
  -5  -1   8    2.19    0.96
  -5   1   8    1.46    0.77
  -5  -1   8    1.61    0.65
  -5   1   8    1.85    1.01
   3   2   7   18.10    2.08
   3   2   7   19.12    1.77
   3  -2   7   14.77    1.32
   3  -2   7   17.32    1.49
   3   2   7   20.18    1.76
   3  -2   7   19.99    1.67
   3   2   7   18.68    1.70
   3   2   7   16.76    1.71
  -7   5   5   33.62    2.76
   7   5  -5   35.35    2.90
  -7   5   5   36.50    2.71
  -7   5   5   34.61    2.76
  -7   5   5   34.79    2.91
  -7   5   5   25.68    2.05
   0   0   8    0.89    0.91
   0   0   8   -0.09    0.99
   0   0   8   -0.05    0.63
   0   0   8   -0.14    0.68
  -9   5   3    7.30    1.13
  -9  -5   3    8.45    1.42
   9   5  -3    7.93    1.15
  -9   5   3    7.12    1.19
  -9   5   3    8.24    1.08
   9   5  -3    6.99    1.11
  -9   5   3    7.42    0.98
  -8  -2   7    4.74    0.99
  -8   2   7    6.42    1.10
  -8  -2   7    5.36    0.99
  -8  -2   7    5.37    1.01
  -8  -2   7    5.25    1.04
   8   2  -7    5.88    0.93
  -8   2   7    5.40    1.03
  -8   2   7    5.02    0.95
  -8   2   7    5.31    1.10
   6   6   2   53.78    4.28
  -6   6  -2   48.07    3.85
   6  -6   2   44.75    3.70
   6   6   2   39.19    3.82
  -6   6  -2   43.02    3.23
   6   6   2   53.07    4.52
   6   6   2   53.04    4.74
  -4   5   6    8.52    0.97
  -4  -5   6   11.50    1.34
  -4   5   6   10.95    1.19
  -4   5   6    9.57    1.22
   4   5  -6   10.21    1.17
   4   7  -2    4.70    1.26
   4   7  -2    5.98    0.86
  -4   7   2    5.57    1.00
   4   7  -2    5.80    1.12
   4   7  -2    6.16    1.24
   4   7  -2    4.85    0.87
  -4   7   2    5.63    1.21
  -4   7   2    6.29    1.09
   1   7  -3   91.26    7.89
  -1   7   3   83.65    7.02
  -1   7   3   93.96    8.36
  -1   7   3   87.04    7.18
  -1   7   3   90.52    8.04
  -1   7   3   99.09    8.66
  -1  -7   3   88.83    7.62
   1   7  -3   88.92    7.49
  -9   4   5    1.85    0.90
  -9   4   5    0.83    0.63
   9   4  -5    1.66    0.79
  -9   4   5    0.76    0.96
   9   4  -5    1.40    0.91
  -9   4   5    1.66    0.82
  -9  -4   5    1.41    0.98
  -9   4   5    1.37    0.66
   4   0   7   -0.13    0.98
   4   0   7    0.67    0.72
  12  -1  -4  115.13    9.48
  12   1  -4  147.16   12.71
 -12   1   4  134.82   11.07
 -12   1   4  126.27   10.67
 -12   1   4  148.27   12.56
 -12  -1   4  130.96   11.42
 -12   2   3    1.83    1.06
 -12  -2   3    2.12    1.47
  12   2  -3    1.46    0.92
  12  -2  -3    0.97    0.75
 -12   2   3    1.33    0.74
   0   5   6    3.44    1.00
   0   5   6    3.59    1.37
   0  -5   6    3.38    0.93
   0  -5   6    2.90    0.74
   0   5   6    2.70    1.01
   0   5  -6    3.45    0.87
  -3   6  -4    0.55    0.89
   3   6   4   -0.21    1.11
   3  -6   4   -0.74    0.79
   3   6   4    0.19    0.98
   3   6   4    0.39    1.21
   3   6   4   -0.14    0.96
   8   0   5    0.23    0.71
   8   0   5   -0.07    0.94
   8   0   5   -0.20    0.64
   8   0   5    0.08    0.93
  -9   3   6    1.84    0.94
   9   3  -6    1.49    0.90
  -9   3   6    1.98    0.86
  -9  -3   6    1.47    0.93
  -9   3   6    1.19    0.95
  -9  -3   6    0.97    0.70
   7   6  -3    0.83    0.85
  -7   6   3   -0.25    0.88
   7   6  -3    0.03    0.82
   7   6  -3    0.55    0.94
  -7   6   3    0.36    0.88
  -7  -6   3    0.55    0.85
   7   6  -3    0.61    0.78
  -7   6   3    0.56    0.86
  -7   6   3   -0.15    0.85
  -7   6   3   -0.09    1.07
  -9   0   7    0.40    0.95
  -9   0   7    0.11    0.86
  -9   0   7    0.26    0.97
  -2   6   5   17.80    1.67
  -2  -6   5   21.90    2.15
  -2   6   5   19.87    2.30
   2   6  -5   23.27    2.30
   2   7  -3   16.71    1.74
   2   7  -3   13.97    1.42
  -2   7   3   16.03    1.83
  -2   7   3   17.92    1.82
  -2   7   3   17.54    1.74
  -2   7   3   16.53    1.80
  -2  -7   3   14.27    1.50
  -2   4   7   45.57    3.92
  -2  -4   7   56.49    4.86
  -2   4   7   38.66    3.36
  -2   4   7   39.52    4.00
  -3   4   7    1.29    1.11
  -3   4   7    1.76    0.70
  -3   4   7    1.66    0.87
  -3  -4   7    1.71    0.85
  -8   5  -2   18.15    1.85
   8   5   2   19.59    2.03
   8   5   2   15.21    1.80
  -8   5  -2   15.05    1.43
   8   5   2   16.66    1.61
   8  -5   2   18.28    1.97
   8   5   2   17.49    2.06
 -11   2   5   46.96    4.18
 -11   2   5   48.88    4.22
  11   2  -5   45.31    4.12
 -11   2   5   44.77    3.84
 -11   2   5   50.26    4.50
 -11  -2   5   50.84    4.63
 -11   3   4   53.96    4.81
 -11  -3   4   60.48    5.47
  11   3  -4   58.63    5.43
 -11   3   4   55.85    4.89
 -11   3   4   60.92    5.26
   0   7   3    1.98    0.95
   0  -7   3    1.49    0.79
   0   7   3    1.34    0.92
   0   7   3    1.16    0.70
   0   7   3    1.72    1.07
   0   7  -3    1.84    0.98
   0   7   3    1.92    0.89
   7   5   3    6.05    1.07
  -7   5  -3    8.59    1.22
   7   5   3    7.67    1.33
   7  -5   3    7.58    1.19
   7   5   3    7.50    0.98
   7   5   3    8.19    1.47
  -4   7  -1   48.03    4.26
   4   7   1   58.71    5.24
   4   7   1   54.13    5.35
   4   7   1   51.54    4.52
   4   7   1   43.46    4.04
  -4   7  -1   47.54    4.09
  -4   7  -1   48.84    4.31
  -4   7  -1   50.23    4.19
  -1   6   5   40.66    3.79
  -1   6   5   38.25    3.54
  -1  -6   5   39.08    3.57
   1   6  -5   41.82    3.66
  -6   0   8  195.54   17.59
  -6   0   8  219.00   12.23
  -6   0   8  216.32   11.61
  -6   0   8  210.18   17.84
 -10   4   4    4.77    1.07
 -10  -4   4    5.50    1.23
 -10   4   4    3.87    0.87
  10   4  -4    3.40    1.00
 -10   4   4    3.79    0.88
  10   4  -4    5.08    1.10
 -10   4   4    4.04    1.12
  10   4   1   21.94    2.18
  10   4   1   24.37    2.50
  10   4   1   20.85    2.07
 -10   4  -1   21.15    2.14
  10  -4   1   29.71    2.86
 -10   4  -1   26.68    2.52
  10   4   1   24.08    2.14
 -10   4  -1   27.62    2.52
   7   6   1   85.24    8.23
   7  -6   1   75.98    6.26
   7   6   1   93.83    8.16
   7   6   1   88.86    8.04
  -7   6  -1   93.45    8.00
  -7   6  -1   88.09    7.36
   0   1   8    3.19    0.80
   0  -1   8    2.83    0.75
   0   1   8    2.84    0.98
   0  -1   8    4.47    0.99
   0  -1   8    3.55    0.96
   0   1   8    3.91    1.03
   0  -1   8    3.63    0.75
  -3   2   8   46.55    4.46
  -3   2   8   45.25    3.97
  -3   2   8   48.47    4.07
  -3  -2   8   44.75    3.78
  -3  -2   8   46.37    4.31
  -3   2   8   39.96    3.42
  -3   2   8   42.21    3.55
  -3  -2   8   51.00    4.38
  -6   6   4   32.35    3.04
  -6   6   4   31.32    2.91
  -6   6   4   31.94    2.90
   6   6  -4   32.99    3.24
  -6   6   4   36.30    3.27
   6   6  -4   30.70    2.84
  -6   6   4   33.71    3.08
   6   6  -4   33.14    3.02
  -6  -6   4   32.67    3.04
   2   3   7   73.65    7.81
   2  -3   7   86.50    7.62
   2   3   7   88.91    7.39
   2   3   7   77.00    6.41
   2  -3   7   96.19    7.97
   2  -3   7   89.60    7.35
   2   3   7   85.13    7.38
   2   3   7   89.04    7.60
   5   6   3   13.32    1.52
  -5   6  -3   11.54    1.37
   5   6   3   12.76    1.72
   5  -6   3   11.28    1.37
   5   6   3   11.27    1.65
   5   6   3   11.27    1.55
 -10   2   6   12.73    1.49
 -10  -2   6   12.91    1.56
 -10  -2   6   11.27    1.27
 -10   2   6   12.57    1.45
  10   2  -6   12.25    1.40
 -10   2   6   12.75    1.56
   3   6  -5   19.00    1.90
  -3   6   5   20.02    1.92
  -3   6   5   21.50    2.38
   3   6  -5   20.77    2.16
  -3  -6   5   20.78    1.97
  -3   6   5   18.49    1.73
  -7   3   7    4.12    0.90
   7   3  -7    5.40    0.98
  -7  -3   7    4.25    0.95
  -7   3   7    4.14    0.95
  -7   3   7    5.41    1.07
  -7   3   7    5.20    0.91
  -7  -3   7    4.07    0.79
  -7   3   7    5.84    1.02
  -2  -2   8   27.93    2.48
  -2   2   8   21.80    2.06
  -2   2   8   23.26    2.45
  -2   2   8   27.64    2.84
  -2  -2   8   30.61    2.82
  -2   2   8   22.64    2.06
  -2  -2   8   20.73    1.90
   4  -1   7  190.72   15.48
   4  -1   7  173.59   14.28
   4   1   7  177.92   14.59
   4   1   7  165.48   13.47
   3   7   2  148.06   12.92
  -3   7  -2  111.91    9.71
  -3   7  -2  141.89   11.58
  -3   7  -2  144.09   12.01
   3   7   2  142.11   12.82
   3   7   2  112.34    9.75
   3   7   2  133.17   12.56
  10   2   3   35.08    3.20
  10   2   3   38.44    3.66
  10  -2   3   47.51    4.41
  10   2   3   40.21    3.46
  10   2   3   41.20    4.13
  -1  -4   7   62.42    5.31
  -1   4   7   46.45    3.88
  -1   4   7   60.64    5.51
  -1   4   7   49.08    4.31
  -4   4   7    1.33    0.71
   4   4  -7    1.49    0.85
  -4  -4   7    2.19    0.89
  -4   4   7    1.86    0.87
  -4   4   7    1.34    0.67
  -4   4   7    1.58    1.03
   8   1   5  123.50   10.05
   8   1   5   93.70    8.61
   8  -1   5   92.71    7.87
   8  -1   5  123.60   10.39
   8  -1   5  117.54    9.88
   8   1   5  125.33   10.77
   8  -1   5  131.49   10.76
  -4   2   8    8.24    1.09
  -4  -2   8    9.78    1.18
  -4   2   8    8.76    1.08
  -4  -2   8    9.91    1.34
  -4   2   8   10.10    1.36
  -4   2   8    9.70    1.24
  -4  -2   8    8.58    1.17
  -9   1   7    7.93    1.14
  -9  -1   7    6.90    1.13
  -9   1   7    7.19    1.16
  -9   1   7    6.56    0.93
  -9  -1   7    7.49    1.18
  -9  -1   7    7.59    1.01
  -9   1   7    7.24    1.18
  -9  -1   7    6.69    1.11
   3   7  -3    1.54    1.11
   3   7  -3    0.75    0.68
  -3   7   3    0.63    0.84
  -3   7   3    1.10    0.83
  -3  -7   3    1.01    0.78
  -3   7   3    0.61    1.05
   0   6  -5   86.07    7.08
   0  -6   5  118.60   10.04
   0   6   5  125.71   10.77
   0   6  -5  123.66   10.39
   0   6   5  106.56    9.36
   0   6   5  115.74   10.23
   0   6   5  106.90    8.80
   0  -6   5  102.59    8.47
   5   7  -1   29.93    2.90
  -5   7   1   39.10    3.43
   5   7  -1   40.18    3.55
   5   7  -1   39.07    3.80
  -5   7   1   47.97    4.25
   5   7  -1   45.93    4.13
  -5   7   1   41.57    3.63
   5   3   6   29.81    3.01
   5   3   6   30.75    2.72
   5   3   6   31.89    2.91
   5  -3   6   30.90    2.85
   5   3   6   27.75    2.70
   5  -3   6   33.34    2.87
  -6  -1   8    9.45    1.05
  -6   1   8    9.12    1.08
  -6   1   8    7.88    1.03
  -6  -1   8    7.31    1.11
  -6   1   8    7.87    1.10
  -6  -1   8    7.58    0.89
  -6   1   8    8.55    0.98
  -6  -1   8    9.50    1.13
  -5   5   6    5.98    1.01
   5   5  -6    5.69    0.92
  -5   5   6    5.14    0.83
  -5   5   6    6.83    0.94
  -5  -5   6    6.71    0.98
   1   7   3    0.10    0.99
   1   7   3    0.96    1.11
   1   7   3    0.31    0.88
   1  -7   3    0.20    0.85
  -1   7  -3    0.43    0.75
   1   7   3    0.24    1.06
  -1   7  -3    0.41    0.83
   9   2   4    2.99    1.03
   9  -2   4    3.89    0.71
   9  -2   4    4.69    1.07
   9   2   4    3.63    1.01
   9   2   4    3.30    1.21
  -9   2  -4    3.75    0.77
 -12  -2   0   58.75    3.77
 -12   2   0   70.30    4.47
 -12  -2   0   60.66    3.27
  12   2   0   61.83    3.68
  12  -2   0   62.93    3.98
  12   2   0   52.28    3.23
  12   0   1   -0.06    0.84
   4   5   5   75.91    4.56
   4   5   5   69.57    4.08
   4  -5   5   77.50    4.67
   4  -5   5   79.93    4.31
   4   5   5   73.58    4.60
   4   5   5   85.79    5.35
  11   3   1   41.00    3.40
 -11   3  -1   46.20    2.98
 -11   3  -1   41.89    2.53
  11   3   1   47.57    2.86
  11  -3   1   48.03    3.05
   5   7   0  128.90    7.92
  -5   7   0  128.69    6.53
   5   7   0  149.22    8.79
  -5   7   0  150.08    8.18
  -5   7   0  134.88    7.77
   5   7   0  141.23    7.97
  -1   2   8  193.52    9.64
  -1  -2   8  221.70   10.92
  -1  -2   8  178.98    8.54
  -1   2   8  201.38   12.93
  -1  -2   8  214.08   11.49
  -1   2   8  183.59    8.99
  -1  -2   8  198.14    9.43
   1   5   6   -0.32    1.10
   1  -5   6    0.23    0.89
   1   5   6   -0.01    1.13
   1   5   6    0.00    0.90
   1  -5   6    0.21    0.69
  -1   5  -6   -0.36    0.73
   1   5   6   -0.10    0.84
  -4  -6   5   19.74    1.51
  -4   6   5   16.93    1.28
  -4   6   5   14.69    1.10
  -4   6   5   21.26    1.74
  -4   6   5   19.96    1.49
   4   6  -5   19.06    1.48
   4   6  -5   17.96    1.56
   7  -3   5   42.04    2.67
   7   3   5   34.17    2.70
   7   3   5   38.41    2.10
   7  -3   5   40.11    2.20
   7   3   5   39.22    2.76
   7   3   5   38.73    2.46
   1   0   8    9.96    1.14
   1   0   8   11.65    1.04
   1   0   8   10.77    1.13
   6   2   6    0.19    0.90
   6  -2   6    1.09    0.74
   6   2   6    1.18    1.05
   6   2   6   -0.07    1.41
   6   2   6    0.73    0.72
   6  -2   6    1.07    0.80
   9   5   1    1.23    1.20
  -9   5  -1    1.77    0.80
   9   5   1    1.40    0.77
   9  -5   1    1.85    0.87
   9   5   1    1.11    0.91
  -9   5  -1    2.11    0.92
  -9   5  -1    1.61    0.76
  -8   6   1   30.10    1.97
  -8   6   1   29.18    1.72
   8   6  -1   33.96    2.35
  -8   6   1   33.80    2.14
   8   6  -1   31.48    2.24
   8   6  -1   27.46    1.59
 -11   2  -2    7.55    1.08
  11  -2   2    6.76    0.98
  11   2   2    6.90    0.89
 -11   2  -2    5.89    0.82
  11   2   2    6.06    1.16
  -8  -4   6   97.64    4.91
   8   4  -6  126.57    6.93
  -8   4   6  131.41    7.23
  -8  -4   6  116.51    5.82
  -8   4   6  124.26    7.03
  -8   4   6  118.14    6.15
  -6   5  -4   52.43    3.17
   6   5   4   44.65    2.74
   6   5   4   45.37    2.41
   6   5   4   49.09    4.17
   6  -5   4   52.78    3.16
   6  -5   4   46.83    2.85
   6   5   4   52.77    3.94
  -5   2   8    1.09    0.87
  -5   2   8    0.85    0.86
  -5   2   8    1.08    0.98
  -5  -2   8    0.26    0.95
  -5  -2   8    0.66    0.81
  -5  -2   8    0.55    0.80
  -5   2   8    0.38    0.80
   0  -4   7   37.61    2.24
   0  -4   7   32.07    1.78
   0   4   7   35.56    2.24
   0   4   7   35.97    2.80
   0   4   7   34.54    2.07
   0   4   7   33.05    1.98
   0   4   7   36.89    2.24
   0  -4   7   37.51    2.21
  -5   4   7   16.05    1.22
  -5   4   7   19.61    1.46
   5   4  -7   16.73    1.28
  -5   4   7   17.70    1.43
  -5  -4   7   16.15    1.47
  -5   4   7   18.68    1.43
  -5   4   7   14.97    1.07
  -5  -4   7   17.76    1.33
 -11   4   2  273.94   15.56
 -11   4   2  268.63   14.71
  11   4  -2  292.85   16.78
  11   4  -2  287.93   16.13
 -11  -4   2  230.27   18.55
 -11   4   2  258.60   12.23
 -11   4   2  271.30   14.71
  12  -1   1    0.50    0.89
 -12   1  -1    0.33    1.02
  12   1   1    0.30    0.89
   5   7  -2   40.58    2.17
   5   7  -2   41.00    2.68
  -5   7   2   46.68    2.76
   5   7  -2   39.22    2.17
  -5   7   2   41.67    2.54
   5   7  -2   37.05    2.61
  -5   7   2   47.78    2.78
   5   7  -2   48.72    3.05
  -8   6   2   87.39    5.95
   8   6  -2   83.68    4.81
  -8   6   2   87.95    5.03
   8   6  -2  104.03    5.70
   8   6  -2   90.45    4.90
  -8   6   2   92.21    4.72
  -8   6   2   96.16    5.36
   6   4   5   65.48    4.42
   6  -4   5   74.77    3.95
   6   4   5   60.74    3.94
   6   4   5   60.51    3.46
   6  -4   5   76.29    4.86
   6   4   5   75.21    3.87
  11   4  -1   40.30    2.62
 -11   4   1   42.84    2.59
 -11   4   1   38.81    2.10
  11   4  -1   45.37    2.93
 -11   4   1   40.80    2.55
  11  -4  -1   38.78    2.12
 -12   2   4   15.37    1.24
 -12  -2   4   18.34    1.58
 -12   2   4   15.68    1.43
  12   2  -4   18.15    1.43
 -12   2   4   17.92    1.40
 -12   2   4   14.66    1.09
 -11   0   6   69.03    4.12
 -11   0   6   67.39    4.38
  -1   6  -5   47.62    2.58
   1   6   5   42.33    2.57
   1  -6   5   46.51    3.09
   1   6   5   44.24    3.32
  -1   6  -5   42.06    2.46
   1  -6   5   43.82    2.47
   1   6   5   44.27    2.81
   1   1   8    9.69    0.96
   1  -1   8    8.07    0.85
   1  -1   8    9.90    0.84
   1  -1   8    9.27    1.04
   1   1   8    8.95    1.18
   1  -1   8   10.32    1.05
   1   1   8   10.78    1.14
   4   7  -3   24.53    1.55
  -4   7   3   29.44    1.99
   4   7  -3   26.18    2.00
  -4   7   3   24.31    1.64
   4   7  -3   24.33    1.78
  -4   7   3   24.33    1.87
  -7   0   8   58.70    3.41
  -7   0   8   49.99    2.82
  -7   0   8   51.27    3.14
  -7   0   8   45.36    2.78
   9   5  -4    6.17    1.02
   9   5  -4    4.01    0.78
  -9   5   4    5.99    0.91
   9   5  -4    6.71    0.98
  -9   5   4    6.10    0.91
  -9   5   4    7.05    1.12
  -9  -5   4    6.88    1.03
  -9   5   4    6.81    1.01
   2  -7   3   31.71    1.90
   2   7   3   38.93    2.54
  -2   7  -3   29.87    1.87
   2   7   3   36.56    2.47
   2   7   3   35.57    2.41
   2   7   3   29.58    2.14
  -2   7  -3   32.18    1.89
   4   4   6   46.94    2.70
   4  -4   6   47.01    2.55
   4   4   6   46.03    3.12
   4   4   6   42.32    2.70
   4   4   6   43.24    2.62
   4  -4   6   47.03    2.76
   8   6   0   16.41    1.53
   8   6   0   16.95    1.44
  -8   6   0   17.42    1.46
  -8   6   0   18.34    1.39
 -13   0   2    3.80    0.80
  13   0  -2    3.78    0.87
 -13   0   2    3.59    0.94
   0  -2   8  399.20   19.19
   0   2   8  421.65   20.49
   0  -2   8  449.85   26.53
   0   2   8  450.71   26.58
   0  -2   8  419.03   24.79
   0   2   8  438.92   28.84
   0  -2   8  412.49   19.48
  12   0  -5   -0.19    0.69
 -12   0   5   -1.01    0.69
 -12   0   5    0.33    0.82
  -4   6  -4   42.20    2.67
   4   6   4   42.14    2.85
   4   6   4   42.85    2.72
   4  -6   4   45.09    2.79
   4   6   4   33.22    2.59
   4   6   4   40.14    2.95
  12   3  -2   30.80    2.02
 -12   3   2   27.76    2.13
  12   3  -2   24.38    2.06
  12  -3  -2   25.15    1.53
 -12   3   2   28.38    2.14
 -12  -3   2   26.39    2.29
  -8   5   5  194.35   10.10
   8   5  -5  172.42    8.21
  -8   5   5  175.20   10.14
   8   5  -5  137.62    9.50
  -8   5   5  203.01   11.05
  -8   5   5  157.23    8.31
   8   5  -5  185.80   10.25
  -8  -5   5  157.46    7.60
   4  -2   7   39.07    2.10
   4  -2   7   34.80    1.88
   4   2   7   43.70    2.67
   4  -2   7   42.00    2.39
   4   2   7   40.03    2.28
   4   2   7   47.99    2.59
  -6   5   6   10.30    0.95
  -6  -5   6   11.21    1.12
   6   5  -6   10.52    1.09
  -6   5   6   11.27    1.16
  -6  -5   6    7.63    0.84
  -6   5   6    9.24    0.99
   5   7   1   22.82    1.50
  -5   7  -1   23.86    1.48
  -5   7  -1   25.67    1.64
   5   7   1   28.68    2.46
  -5   7  -1   23.86    1.69
   5   7   1   27.03    1.86
 -11   1   6    4.42    0.86
 -11  -1   6    5.14    1.04
 -11   1   6    4.26    0.91
  11   1  -6    3.43    0.75
 -11  -1   6    3.16    0.78
 -11   1   6    4.23    0.97
   4   7   2   -0.09    0.94
  -4   7  -2   -0.10    0.86
  -4   7  -2    0.72    0.68
  -4   7  -2    0.06    0.77
   4   7   2    1.16    1.17
   8   2   5    7.82    0.77
   8   2   5    7.18    1.06
   8   2   5    7.04    1.37
   8  -2   5    7.65    0.80
   8  -2   5    7.23    0.99
   8   2   5    6.26    1.05
 -11   4   3    1.93    0.86
 -11   4   3    0.14    1.02
 -11  -4   3    0.97    1.31
  11   4  -3    1.07    1.01
 -11   4   3    0.81    0.93
  11   4  -3    0.60    0.91
  -5   6   5    6.92    0.81
  -5   6   5    6.78    1.02
  -5  -6   5    7.94    1.04
  -5   6   5    6.40    0.97
   5   6  -5    7.40    1.00
  -5   6   5    6.31    0.84
   5   6  -5    6.77    1.14
  -7  -1   8   24.39    1.91
  -7  -1   8   24.34    1.83
  -7   1   8   24.91    1.86
  -7   1   8   24.70    1.92
  -7  -1   8   25.15    1.96
  -7  -1   8   21.89    1.77
  -7   1   8   25.12    2.00
  -7   1   8   24.92    1.86
  -9   2   7    1.94    0.82
  -9  -2   7    1.70    0.81
  -9   2   7    1.60    0.84
   9   2  -7    1.53    0.71
  -9  -2   7    2.75    0.94
  -9   2   7    1.89    0.95
  -9  -2   7    2.18    0.86
  -9   2   7    1.75    0.86
  10   5  -2    4.17    0.90
 -10   5   2    3.73    0.86
  10   5  -2    4.29    1.07
 -10   5   2    3.85    0.96
 -10   5   2    4.92    1.09
 -10   5   2    4.62    0.84
 -10   5   1  160.53   10.14
  10   5  -1  180.92    9.41
  10   5  -1  211.85   12.69
 -10   5   1  203.76   13.69
 -10   5   1  194.70    9.77
  12   3  -1    2.23    0.85
 -12   3   1    1.49    1.01
  12   3  -1    1.35    0.95
 -12   3   1    1.40    0.94
 -12  -3   1    2.66    1.26
  12  -3  -1    2.27    0.92
   3   3   7  395.30   25.61
   3  -3   7  348.48   22.43
   3  -3   7  355.03   21.34
   3   3   7  418.91   24.79
   3   3   7  381.76   24.18
   3   3   7  375.73   23.20
  -6   2   8   30.78    2.19
  -6  -2   8   30.24    2.29
  -6   2   8   28.44    2.23
  -6   2   8   33.74    2.42
  -6  -2   8   28.38    1.97
  -6   2   8   32.41    2.31
  -6  -2   8   29.71    2.36
 -13   0   1   -0.34    0.90
  13   0  -1    0.13    0.83
  -7   6   4  106.00    7.08
   7   6  -4   90.28    5.58
  -7   6   4  120.91    7.65
  -7   6   4  118.62    7.61
  -7   6   4  118.23    7.66
   7   6  -4  121.03    7.64
   7   6  -4   96.13    6.95
  13   0  -3    0.29    0.80
 -13   0   3   -0.30    0.85
 -13   0   3   -0.11    0.77
 -13   1   2   29.86    2.20
  13  -1  -2   25.78    1.95
  13   1  -2   26.70    2.07
 -13  -1   2   25.50    1.78
 -13  -1   2   26.10    1.99
   7   0   6   19.93    1.68
   7   0   6   19.15    1.45
   7   0   6   21.48    1.55
 -12   1   5   12.05    1.20
 -12   1   5   11.27    1.16
  12   1  -5   10.80    1.13
 -12  -1   5   11.11    1.22
 -12   1   5   12.25    1.14
 -12   1   5   10.77    1.01
  -8  -3   7    2.53    0.85
   8   3  -7    1.68    0.77
  -8  -3   7    2.30    0.75
  -8   3   7    3.38    0.92
  -8   3   7    2.66    0.81
  -8   3   7    2.32    0.76
  -8  -3   7    2.05    0.87
  -8   3   7    2.59    0.84
   1  -4   7  143.37    8.60
   1   4   7  154.26    9.97
   1  -4   7  134.85    8.24
   1   4   7  144.27    8.51
   1  -4   7  162.19    9.90
   1   4   7  142.35    9.62
   1   4   7  140.51    8.47
   2   5   6   41.51    2.96
   2   5   6   39.36    3.04
   2  -5   6   40.53    2.77
   2   5   6   40.02    3.40
   2  -5   6   42.75    3.02
  -6   4   7   13.16    1.20
   6   4  -7   12.81    1.21
  -6  -4   7   12.37    1.21
  -6  -4   7   10.73    1.10
  -6   4   7   11.05    1.13
  -6   4   7   12.10    1.27
 -12  -3   3    9.21    1.41
 -12   3   3   10.37    1.29
 -12   3   3    8.31    0.96
  12   3  -3   10.83    1.22
 -12   3   3   10.09    1.15
  12   3  -3    9.99    1.19
 -11   4   0    0.01    0.82
  11  -4   0    0.48    0.84
 -11   4   0    0.43    0.93
  11   4   0    0.08    0.71
  11   4   0    0.23    0.89
   9   4   3  245.38   16.93
   9   4   3  219.37   13.98
   9  -4   3  228.36   13.83
   9  -4   3  225.83   15.60
  -9   4  -3  221.40   14.00
   9   4   3  207.83   14.00
  -8   6   3   18.26    1.50
   8   6  -3   14.92    1.33
  -8   6   3   18.40    1.53
  -8   6   3   18.58    1.49
   8   6  -3   19.03    1.54
  -8   6   3   17.17    1.44
   8   6  -3   16.75    1.43
  -8  -6   3   16.18    1.40
   7   6   2  101.28    7.13
   7  -6   2   96.60    6.05
   7   6   2   88.02    5.88
   7   6   2   97.21    6.60
  -7   6  -2  100.30    6.53
   5   0   7    0.27    0.77
   5   0   7   -0.32    0.90
   6   7  -1    0.38    1.05
  -6   7   1    0.50    0.93
   6   7  -1    0.53    0.80
   6   7  -1    0.66    0.92
  -6   7   1    0.39    0.88
   6   7  -1    0.97    1.29
 -11   3   5   31.26    2.10
 -11   3   5   31.69    2.04
 -11   3   5   38.59    2.77
  11   3  -5   39.80    2.78
 -11  -3   5   36.99    2.78
 -11   3   5   32.76    2.49
   2   0   8  386.20   23.20
   2   0   8  427.19   25.29
   2   0   8  435.96   25.64
 -13  -1   1    5.88    0.93
  13  -1  -1    5.53    0.92
  13   1  -1    6.77    1.03
 -13  -1   1    5.72    0.91
 -13   1   1    7.17    1.14
  13   1  -1    5.52    0.90
 -10   0   7    0.36    0.83
 -10   0   7    0.08    0.84
   2  -6   5   60.44    3.94
   2  -6   5   60.64    4.09
   2   6   5   69.24    5.28
   2   6   5   63.92    4.14
   2   6   5   58.68    4.22
  -2   6  -5   60.80    3.91
 -13   1   3   68.63    4.47
 -13  -1   3   71.89    4.84
  13   1  -3   75.76    5.18
  13  -1  -3   66.00    4.26
  11   0   3   -0.63    0.82
  11   0   3   -0.29    0.86
   7   1   6    7.75    1.04
   7  -1   6    6.82    0.81
   7   1   6    8.22    1.16
   7   1   6    8.25    0.90
   7  -1   6    6.76    1.02
   7  -1   6    9.09    0.95
  -3   3   8    0.69    0.73
   3   3  -8   -0.03    0.67
  -3  -3   8    0.13    0.67
  -3  -3   8    0.37    0.84
  -3   3   8    0.16    0.71
  -3   3   8   -0.08    0.76
  -3   3   8    0.21    0.98
  -3  -3   8    0.05    0.93
  -6   6  -3   78.80    5.76
   6   6   3   75.32    5.70
   6  -6   3   75.09    4.94
   6   6   3   80.76    5.54
   6   6   3   75.39    5.85
 -12   2  -1   10.37    1.09
 -12  -2  -1    9.37    1.24
  12   2   1   12.14    1.39
 -12   2  -1   12.10    1.35
  12  -2   1   10.05    1.18
  12   2   1   11.50    1.16
  10   0   4   31.86    3.44
  10   0   4   34.07    2.39
  10   0   4   35.12    2.54
 -10   4   5   45.90    3.23
  10   4  -5   40.18    2.94
 -10   4   5   46.72    3.41
 -10   4   5   40.26    2.58
 -10  -4   5   44.86    3.11
  10   4  -5   45.66    3.07
 -10   3   6   13.24    1.38
 -10  -3   6   14.35    1.37
 -10   3   6   12.79    1.10
  10   3  -6   15.54    1.37
 -10   3   6   14.17    1.31
  -5   7   3    0.99    0.85
  -5   7   3    0.50    0.82
   5   7  -3    0.80    0.99
   5   7  -3    0.85    0.93
   5   7  -3    1.02    0.71
  -1   7   4   24.95    2.09
   1   7  -4   25.18    1.93
  -1   7   4   22.18    1.72
  -1  -7   4   24.14    1.80
   1   7  -4   23.36    1.73
   2   7  -4   94.31    5.95
  -2  -7   4   98.26    6.28
  -2   7   4  109.90    6.91
  -2   7   4  102.90    6.32
   2   7  -4  106.20    6.95
  -2   7   4   97.76    6.59
  10   4   2  194.41   13.17
  10   4   2  168.85   10.29
  10   4   2  169.03   10.72
 -10   4  -2  169.93   10.29
  10  -4   2  180.57   12.29
  10   4   2  182.63   11.88
 -10   4  -2  194.60   11.75
  -2  -3   8    1.26    0.66
   2   3  -8    1.26    0.66
  -2   3   8    1.44    0.73
  -2   3   8    0.40    0.74
  -2   3   8    0.52    1.01
  -2  -3   8    1.28    0.97
  10  -3   3   88.27    7.18
  10   3   3   85.70    5.78
  10   3   3   98.58    7.23
 -10   3  -3   77.13    5.04
  10   3   3   76.81    4.96
  -6   7   0  114.04    7.46
   6   7   0  115.74    7.78
  -6   7   0  121.70    7.73
   6   7   0  108.50    8.08
   6   7   0  107.39    7.76
 -10   5   3   28.09    2.14
  10   5  -3   23.56    1.89
 -10   5   3   21.73    1.57
 -10   5   3   24.00    1.79
 -10   5   3   23.69    1.90
  10   5  -3   23.55    1.89
 -10  -5   3   34.91   12.46
 -10   5   0   22.77    1.66
 -10   5   0   19.23    1.53
 -10   5   0   23.66    1.78
  10   5   0   20.65    1.80
   8   4   4  400.00   26.26
   8  -4   4  460.78   35.20
   8  -4   4  452.19   31.74
  -8   4  -4  452.18   33.87
   8   4   4  474.16   38.98
   8   4   4  417.61   30.51
   3  -7   3    3.46    0.82
   3   7   3    3.85    1.09
  -3   7  -3    3.10    0.89
   3   7   3    3.37    1.16
   1   2   8   97.32    5.90
   1  -2   8   97.06    5.92
   1   2   8  105.26    6.32
   1  -2   8  107.34    6.56
   1   2   8   88.31    6.21
   1  -2   8  111.09    6.54
  -4   3   8    6.84    1.12
  -4   3   8    5.85    0.90
  -4   3   8    4.81    0.81
  -4  -3   8    6.80    0.95
  -4  -3   8    6.77    1.08
   5   1   7  346.89   21.44
   5  -1   7  345.88   20.54
   5  -1   7  319.99   19.89
   5   1   7  338.78   20.93
  -6   7   2  297.71   19.18
   6   7  -2  245.37   16.22
   6   7  -2  284.85   19.02
   6   7  -2  287.65   17.54
  -6   7   2  304.43   18.20
  -6   7   2  317.66   20.10
   2  -1   8    2.20    0.76
   2   1   8    3.09    0.80
   2  -1   8    3.07    0.82
   2   1   8    2.52    0.88
   2   1   8    1.85    1.01
  -5   5  -5   45.55    3.65
   5   5   5   43.51    2.86
   5  -5   5   51.06    3.74
   5   5   5   49.00    4.03
   5   5   5   49.58    4.20
   5  -5   5   47.66    3.20
   0   7   4   53.54    3.62
   0   7   4   54.50    3.88
   0   7   4   55.28    4.05
   0  -7   4   51.54    3.17
   0  -7   4   61.63    4.09
   0   7  -4   65.53    4.19
 -10  -1   7    2.29    0.91
 -10   1   7    3.10    0.92
 -10   1   7    3.21    0.94
 -10  -1   7    2.68    0.83
  -8   6  -1   34.70    2.44
  -8   6  -1   32.79    2.19
   8   6   1   31.71    2.66
   8   6   1   34.86    2.66
   9   3   4    3.25    0.93
   9  -3   4    4.01    0.94
   9   3   4    3.67    1.03
   9  -3   4    4.14    0.67
  -9   3  -4    3.72    0.76
 -12   3   0   83.58    6.16
 -12   3   0   94.48    6.32
  12   3   0   90.17    5.79
  12   3   0   99.51    6.32
  12  -3   0   91.31    6.30
  11   1   3  179.42   11.66
  11   1   3  184.50   11.45
  11  -1   3  178.08   11.76
  11  -1   3  136.50    8.41
  11   1   3  217.75   17.09
  -3  -7   4  294.61   15.92
   3   7  -4  278.52   19.65
  -3   7   4  266.12   19.68
  -3   7   4  326.58   17.87
   3   7  -4  269.05   20.34
  -3   7   4  292.94   16.27
  -8   0   8    2.81    0.83
  -8   0   8    3.66    0.87
  -8   0   8    3.64    0.96
  -8   0   8    2.79    1.02
  10   1   4    0.09    0.89
  10  -1   4    0.57    0.80
  10  -1   4    0.18    0.86
  10   1   4   -0.31    0.93
   8   5   3    4.33    0.89
   8   5   3    4.53    1.29
   8  -5   3    4.90    0.81
  -8   5  -3    5.27    0.96
   8  -5   3    5.33    0.96
   8   5   3    4.96    1.09
  -1   3   8  123.85    8.77
  -1   3   8  123.43   10.18
  -1  -3   8  134.34    9.59
  -1   3   8  122.32    9.12
  -6   6   5   74.46    5.44
   6   6  -5   59.81    4.30
  -6   6   5   68.44    5.11
   6   6  -5   73.90    5.52
  -6   6   5   70.79    5.06
   6   6  -5   71.57    5.55
  13   0   0   53.65    4.27
 -13   0   0   54.81    4.20
  11   2  -6   29.56    2.39
 -11   2   6   33.32    2.75
 -11   2   6   27.06    2.17
 -11  -2   6   29.82    2.56
 -11   2   6   29.53    2.31
   6   3   6   28.41    2.37
   6   3   6   28.94    2.36
   6   3   6   30.68    2.75
   6  -3   6   31.49    2.41
   6  -3   6   27.22    2.35
   6   3   6   29.98    2.26
  -9   4   6   24.30    2.13
  -9   4   6   22.76    1.79
  -9  -4   6   21.43    1.76
   9   4  -6   23.58    2.01
  -9   4   6   24.94    2.10
  -7  -2   8   23.02    1.98
  -7  -2   8   27.06    2.20
  -7  -2   8   21.46    1.87
  -7   2   8   27.65    2.15
  -7   2   8   25.68    2.07
  -7   2   8   25.08    2.07
  -7   2   8   27.79    2.33
   9   5   2   17.35    1.79
   9  -5   2   19.59    1.72
   9   5   2   19.60    1.76
  -9   5  -2   20.59    1.77
   9   5   2   16.22    1.53
   9  -5   2   19.50    1.56
 -13   0   4   35.57    2.83
  13   0  -4   35.93    2.73
  11  -3   2    1.99    0.90
  11   3   2    2.95    0.94
 -11   3  -2    2.20    0.94
  11   3   2    2.15    0.93
  11   4  -4    0.49    0.88
 -11   4   4    0.28    0.88
  11   4  -4    0.44    0.88
 -11   4   4    0.20    0.93
 -11   4   4    0.65    0.87
 -11  -4   4    0.30    1.03
  -7   5   6   39.08    2.98
  -7   5   6   43.52    3.14
  -7   5   6   44.00    3.45
   7   5  -6   43.34    3.37
  -5   3   8    1.88    0.77
  -5   3   8    2.24    0.81
  -5   3   8    2.38    0.95
  -5  -3   8    2.25    1.06
  -5  -3   8    1.72    0.84
  -5   3   8    1.60    0.83
   0   8   0  138.02   10.49
   0   8   0  131.52    9.37
   0   8   0  137.98   10.23
  12   0   2   81.41    6.21
  13  -2  -2  202.28   14.58
  13   2  -2  227.25   17.48
  13   2  -2  201.33   15.99
 -13   2   2  245.69   18.43
 -13  -2   2  235.34   18.00
 -13   2   2  217.03   16.24
  12   2  -5   79.64    6.04
 -12   2   5   79.70    5.85
 -12   2   5   88.59    6.33
 -12  -2   5   79.02    6.64
 -12   2   5   83.65    5.86
   2   4   7    9.26    0.99
   2   4   7   10.13    1.37
   2  -4   7    9.88    1.06
   2   4   7    8.86    1.03
   2   4   7   11.24    1.39
   2  -4   7    9.40    1.11
  -8  -1   8   30.50    2.54
  -8   1   8   31.82    2.70
  -8  -1   8   33.98    2.77
  -8   1   8   32.42    2.64
  -8  -1   8   35.26    2.78
  -8   1   8   34.66    2.76
  -8  -1   8   34.96    2.62
  -1   8   0   14.04    1.48
   1   8   0   16.18    1.64
   1   8   0   14.71    1.54
  -1   8   0   15.95    1.58
   1   8   0   14.84    1.53
  -1   8   0   14.77    1.39
   9   0   5   -0.62    0.87
   9   0   5   -0.04    0.85
  -7  -4   7   48.78    3.67
   7   4  -7   49.05    3.80
  -7   4   7   47.58    3.62
  -7   4   7   53.44    4.00
  -7   4   7   55.16    4.13
   1   7   4    0.76    0.96
   1   7   4    1.11    1.03
   1  -7   4    0.71    0.83
  -1   7  -4    0.72    0.75
 -12   3   4   29.87    2.37
 -12  -3   4   31.22    2.70
  12   3  -4   30.87    2.67
 -12   3   4   31.09    2.59
 -12   3   4   32.63    2.67
  12   3  -4   34.19    2.85
  -5   7  -2    1.40    0.83
   5   7   2    2.70    1.19
   5   7   2    0.80    1.41
   5   7   2    1.84    0.91
  13   1   0    8.75    1.11
  13  -1   0    9.93    1.16
 -13  -1   0    8.88    1.05
 -13   1   0    9.01    1.21
   5  -6   4  104.91    7.87
   5   6   4  101.10    8.25
  -5   6  -4  106.46    7.95
   5   6   4  102.04    8.25
   5   6   4   99.71    7.76
   5  -6   4   98.23    7.24
   3   5   6   43.96    3.49
   3   5   6   46.16    3.48
   3   5   6   47.09    3.74
   3  -5   6   43.75    3.25
   3  -5   6   47.58    3.67
  -4  -7   4   28.07    2.20
   4   7  -4   24.45    2.02
   4   7  -4   26.51    2.27
  -4   7   4   25.28    3.14
  -4   7   4   28.52    2.25
   4   7  -4   26.49    2.26
  -4   7   4   24.66    2.03
 -13  -1   4   10.60    1.23
  13   1  -4   10.30    1.15
 -13   1   4   11.83    1.30
 -13   1   4   10.26    1.16
   0   8  -1    1.29    0.95
   0   8   1    0.78    1.03
   0   8  -1    1.75    0.98
   0   8   1    1.42    0.92
   7   5   4   40.32    3.46
   7  -5   4   34.25    2.71
  -7   5  -4   39.70    3.07
   7  -5   4   36.41    2.90
   9   6  -1   74.62    5.59
  -9   6   1   75.42    5.58
  -9   6   1   69.38    5.08
   1   8  -1   30.35    2.45
   1   8  -1   30.55    2.45
  -1   8   1   33.81    2.73
   1   8  -1   30.25    2.52
  -1   8   1   27.64    2.55
   5   4   6   48.02    3.76
   5  -4   6   41.24    3.33
   5   4   6   39.06    2.93
   5   4   6   39.35    3.36
   5  -4   6   37.74    2.86
   5   4   6   40.51    3.03
   6   7   1   -0.08    1.23
  -6   7  -1    0.94    0.70
   6   7   1    0.50    0.86
  -6   7  -1    0.70    0.90
  13   2  -1   18.75    1.75
 -13   2   1   18.93    1.83
  13   2  -1   15.11    1.45
  13  -2  -1   16.06    1.49
 -13   2   1   18.54    1.81
  12  -1   2    3.34    0.89
 -12   1  -2    3.83    1.04
  12   1   2    2.94    0.85
  12  -1   2    3.59    0.83
  13   2  -3   29.94    2.55
 -13   2   3   31.42    2.60
  13   2  -3   30.27    2.49
 -13  -2   3   29.04    2.47
 -13   2   3   31.00    2.54
   0  -3   8   23.01    1.88
   0   3   8   18.88    1.57
   0   3   8   21.57    1.77
   0   3   8   19.63    2.10
   7   2   6    4.37    0.99
   7   2   6    4.55    0.91
   7  -2   6    5.42    0.84
   7   2   6    5.11    0.77
   7  -2   6    4.61    0.79
  -9   6   2   52.23    4.04
   9   6  -2   56.61    4.34
  -9   6   2   55.20    4.39
  -9  -6   2   47.02    3.66
  -3   6  -5   10.59    1.17
   3  -6   5   11.02    1.18
   3  -6   5   10.86    1.12
   3   6   5   10.23    1.56
   3   6   5   10.15    1.19
   3   6   5   11.79    1.48
  11  -4   1   63.27    4.69
  11   4   1   66.80    4.91
  11   4   1   65.23    4.73
 -11   4  -1   63.41    4.74
   9  -1   5    6.60    0.90
   9   1   5    6.77    1.08
   9   1   5    6.90    1.13
   9   5  -5    2.41    0.80
  -9   5   5    2.13    0.93
  -9   5   5    1.90    0.81
  -9   5   5    2.12    0.72
   4  -3   7   40.95    3.03
   4   3   7   42.26    3.37
   4   3   7   43.13    3.17
   4  -3   7   40.84    2.99
   4   3   7   41.98    7.36
   4   3   7   38.81    2.96
   2   8   0   22.71    2.06
  -2   8   0   26.65    2.18
  -2   8   0   25.23    2.10
   2   8   0   27.26    2.33
   2   8   0   27.17    2.33
   1   8   1    4.89    1.04
   1   8   1    3.47    1.10
   1   8   1    3.49    0.82
  -1   8  -1    3.98    0.94
  -1   8  -1    3.53    0.93
   1   8   1    4.16    1.13
  -8   6   4   20.54    1.75
   8   6  -4   22.48    1.91
  -8   6   4   19.63    1.81
  -8   6   4   21.02    1.77
  -8   6   4   22.03    1.85
   8   3   5   26.35    2.52
   8   3   5   24.04    2.05
   8  -3   5   26.83    2.06
   8  -3   5   26.73    2.25
   8   3   5   28.12    2.58
  -8   3  -5   24.30    1.97
  -6   7   3    2.15    0.93
   6   7  -3    1.75    0.82
  -6   7   3    1.65    1.25
   6   7  -3    1.45    0.90
  -6   7   3    1.94    0.78
   7   4   5   98.30    7.63
   7  -4   5   89.71    6.78
   7  -4   5   97.57    6.96
   7   4   5   90.62    6.95
  -7   4  -5  102.32    7.61
   7   4   5   85.39    6.42
   5   2   7    1.52    0.91
   5   2   7    1.08    0.72
   5  -2   7    1.59    0.76
  -9   3   7    4.66    0.87
   9   3  -7    4.09    0.86
  -9   3   7    5.05    0.94
  -9   3   7    4.11    0.81
  -2  -5   7   46.14    3.55
   2   5  -7   52.57    3.83
  -3  -5   7  124.64    9.09
   3   5  -7  120.81    8.70
   2   8  -1    2.41    1.12
   2   8  -1    2.60    1.02
   2   8  -1    1.72    1.05
  -2   8   1    2.60    0.92
   2   6  -6   40.44    3.14
  -2  -6   6   42.80    3.33
   2   6  -6   43.34    3.30
   2  -2   8    9.90    1.05
   2   2   8    8.77    1.09
   2   2   8    9.73    1.10
   2   2   8    8.50    1.10
   3   0   8  209.69   14.99
   3   0   8  213.21   14.64
  -6   3   8   14.23    1.33
  -6   3   8   13.94    1.37
  -6   3   8   14.25    1.38
  -6  -3   8   13.62    1.45
  -6   3   8   13.42    1.23
  -6  -3   8   13.76    1.35
 -10   5   4    0.73    0.88
 -10   5   4    1.19    0.73
  10   5  -4    1.31    0.90
 -10   5   4    0.71    0.92
  10   5  -4    1.27    0.83
 -10  -5   4    0.71    0.89
 -10   2   7    3.09    0.93
 -10  -2   7    3.29    0.87
 -10   2   7    3.15    0.81
   4   7   3    5.93    1.28
  -4   7  -3    5.68    0.97
   4   7   3    6.50    1.17
  10   5   1    9.95    1.17
 -10   5  -1   10.33    1.11
  11   2   3   10.76    1.29
 -11   2  -3   10.45    1.32
  11  -2   3   10.96    1.25
  11   2   3   10.60    1.37
   3   6  -6    0.84    0.87
   3   6  -6    0.68    0.75
  -3  -6   6    1.14    0.82
  10   2   4   22.98    1.89
  10  -2   4   20.48    1.62
  10   2   4   20.54    1.78
  -1  -6   6   64.01    4.09
   1   6  -6   70.28    3.89
  -7   7   1   49.02    3.06
   7   7  -1   46.91    2.81
   7   7  -1   45.54    3.07
  -7   7   1   49.74    3.15
  -9   6   0   42.65    2.52
  -9   6   0   43.21    2.61
   9   6   0   39.90    2.83
  -1  -5   7   93.90    5.29
  -1  -5   7   90.16    4.97
  -4  -5   7   75.52    4.70
   4   5  -7   71.46    4.35
   2   7   4    4.60    1.07
   2  -7   4    4.27    0.84
   2   7   4    4.12    0.98
   2  -7   4    4.61    0.85
 -12   0   6   71.99    4.28
   2   8   1  213.41   14.35
  -2   8  -1  238.12   12.97
   2   8   1  206.29   10.91
   2   8   1  216.50   12.65
   2   8   1  234.08   12.88
  -2   8  -1  257.95   13.48
   3   1   8    6.88    1.02
   3   1   8    6.43    0.86
   3  -1   8    6.29    0.82
  -7   6   5  265.91   14.30
  -7   6   5  254.08   13.72
   7   6  -5  231.89   13.40
   7   6  -5  258.17   14.78
  -7   6   5  237.08   12.66
  -5   7   4   13.64    1.13
   5   7  -4   12.37    1.28
   5   7  -4   13.64    1.13
   5   7  -4   10.07    1.09
  -5   7   4   13.61    1.21
  -9   6   3   10.57    1.14
   9   6  -3    8.66    0.95
  -9   6   3    9.12    1.03
   9   6  -3    9.63    1.04
  -9   6   3   10.80    1.04
  -7   7   2    0.82    0.86
  -7   7   2    0.41    0.79
 -12   3  -1   63.79    3.93
  12  -3   1   72.57    4.37
   4   6  -6   55.88    3.44
   4   6  -6   53.32    3.17
  -4  -6   6   52.98    3.18
  -8   2   8   94.14    5.60
  -8   2   8   99.07    5.86
  -8   2   8  107.83    5.82
  -8  -2   8  103.20    5.93
 -12   4   2   82.07    5.07
  12   4  -2   85.01    5.09
 -12  -4   2   88.14    5.75
 -12   4   2   81.05    5.21
  12   4  -2   86.57    5.32
  -3   0   9   -0.27    0.89
  -3   0   9    0.04    0.88
   1   8  -2   13.93    1.35
  -1   8   2   13.47    1.50
   1   8  -2   14.02    1.31
  -1   8   2   13.21    1.79
  -3   8   0    8.51    1.02
   3   8   0    7.15    1.16
  -3   8   0    8.38    1.20
   3   8   0    8.00    1.20
   3   8   0    7.29    1.07
  -7   7   0    9.63    1.08
   7   7   0   10.49    1.14
  -7   7   0    8.28    0.90
   7   7   0    9.46    1.50
  -3   8   1   -0.22    0.94
  -3   8   1   -0.34    0.86
   3   8  -1    0.41    0.93
   3   8  -1   -0.95    1.05
   3   8  -1    0.16    0.99
   0   8   2   26.98    1.95
   0   8   2   25.79    1.68
   0   8  -2   27.75    1.93
   0   8  -2   30.63    2.05
   0   8   2   28.80    2.25
  -9   0   8   32.04    2.25
  -9   0   8   32.28    2.11
  -9   0   8   32.90    2.08
  -4   0   9   -0.10    0.95
  -4   0   9    0.44    0.94
  -4   0   9    0.05    0.72
 -13   2   0    6.92    1.15
  13  -2   0    6.67    0.95
  13   2   0    6.23    0.90
 -13   2   0    6.62    1.00
   0  -6   6   14.53    1.26
 -12  -1   6    8.24    1.06
 -12   1   6    7.48    0.92
   1   3   8   96.70    5.15
   1   3   8   94.52    5.49
   6   0   7    0.48    0.71
   6   0   7   -0.05    0.81
 -13   2   4    0.43    0.94
 -13  -2   4    0.37    0.91
  13   2  -4    1.36    0.84
 -13   2   4    1.42    0.77
   8   6   2   43.61    2.63
   8  -6   2   46.73    2.66
  -8   6  -2   51.61    3.21
   8   6   2   49.48    3.19
  -2   0   9    0.43    0.88
  -2   0   9    0.28    0.90
 -12   4   1  112.25    6.46
 -12   4   1  105.47    6.43
 -12  -4   1  103.59    6.84
  12   4  -1  102.12    6.58
  12   4  -1  108.89    6.01
  -7   6  -3   34.68    2.34
   7  -6   3   31.15    2.03
   7   6   3   36.18    2.60
   7   6   3   32.07    2.11
 -13   0  -1    0.20    0.98
  13   0   1   -0.04    0.80
   8   5  -6   -0.14    0.85
  -8   5   6    0.90    0.86
  -8   5   6    0.69    0.80
   8   5  -6    0.45    0.86
   2   8  -2  109.42    6.37
  -2   8   2  115.90    7.03
   2   8  -2  108.39    6.46
  -2   8   2  110.39    6.84
   3   4   7   13.06    1.30
   3  -4   7   11.00    0.98
   3  -4   7   11.94    1.07
   3   4   7   13.90    1.50
   3   4   7   12.10    1.08
   0  -5   7   93.30    5.34
  12   2   2   10.48    1.26
  12   2   2   10.59    1.23
 -12   2  -2    9.86    1.12
  12  -2   2    9.80    1.14
 -11   0   7   -0.23    0.84
  -5  -5   7    3.54    0.90
   5   5  -7    3.04    0.85
  -5  -5   7    2.10    0.77
  11   5  -2    3.25    0.94
 -11   5   2    0.72    0.86
 -11  -5   2    0.94    1.19
 -11   5   2    0.60    0.78
  -8   4   7   13.33    1.18
  -8   4   7   13.49    1.18
   8   4  -7   15.38    1.22
  -8   4   7   15.30    1.16
 -13   0   5    0.09    0.77
  -3   1   9   27.70    1.89
  -3  -1   9   26.17    1.64
  -3   1   9   27.56    1.91
  -3  -1   9   25.73    1.98
  -3  -1   9   29.09    1.80
   9   2   5   22.70    1.64
   9  -2   5   21.00    1.49
   9   2   5   23.77    1.75
   1   8   2   28.04    1.78
   1   8   2   28.21    2.20
  -1   8  -2   30.53    1.97
  -1   8  -2   31.22    2.00
   1   8   2   28.43    2.05
   8   0   6   16.81    1.33
   6  -5   5    6.87    0.95
  -6   5  -5    7.67    0.94
   6   5   5    8.04    1.34
   6  -5   5    7.14    0.82
   6   5   5    8.00    1.18
  11   5  -1   35.90    2.65
 -11   5   1   39.94    2.56
 -12   4   3   74.45    4.52
 -12  -4   3   70.67    4.38
 -12   4   3   71.10    4.42
  12   4  -3   71.40    4.16
  12   4  -3   74.80    4.53
  -9   1   8   44.34    2.76
  -9  -1   8   41.09    2.47
  -9   1   8   39.87    2.63
  -9  -1   8   46.08    2.81
  -9   1   8   38.05    2.68
  -5   0   9    0.67    0.93
  -5   0   9    0.44    0.88
  -5   0   9   -0.12    0.70
  -4  -1   9    4.97    0.77
  -4  -1   9    5.05    0.93
  -4   1   9    4.06    0.97
  -4  -1   9    5.18    0.99
  -4   1   9    4.96    0.92
 -11   3   6    9.36    1.03
 -11  -3   6   10.89    1.10
 -11   3   6   10.91    1.14
  11   3  -6   10.22    1.03
   6  -1   7    6.02    0.79
   6   1   7    6.05    0.99
   6   1   7    5.67    0.78
  -7   3   8   23.21    1.58
  -7  -3   8   25.01    1.67
  -7  -3   8   27.28    1.84
  -2  -1   9    6.89    0.98
  -2   1   9    7.18    1.12
  -2   1   9    5.81    0.91
  11   4  -5    0.18    0.85
 -11  -4   5    0.58    0.82
 -11   4   5    0.32    0.87
 -11   4   5    0.40    0.87
 -13   1  -1  177.39   10.50
  13   1   1  187.17   11.02
  13  -1   1  185.06   11.82
  -4   5  -6   57.21    3.33
   4   5   6   62.37    4.13
   4  -5   6   54.89    3.16
   4   5   6   62.71    3.74
   4  -5   6   60.02    3.63
   5   6  -6   17.84    1.35
  -5  -6   6   17.77    1.37
   5   6  -6   16.74    1.42
   3   8   1   51.67    3.19
   3   8   1   55.43    3.64
 -11  -1   7   57.33    3.61
 -11   1   7   65.96    3.76
 -11   1   7   57.69    3.37
  -1   0   9   -0.68    0.84
  -1   0   9   -0.43    0.84
 -13   3   2   68.68    4.19
  13   3  -2   73.65    4.59
  13   3  -2   77.70    4.82
 -13  -3   2   75.80    4.70
 -13   3   2   66.64    4.08
  12   3  -5    1.41    0.81
 -12   3   5    1.67    0.91
  12   3  -5    1.51    0.83
 -12  -3   5    2.30    0.87
  -3  -4   8    1.09    0.82
  -3  -4   8   -0.03    0.85
  -6   7  -2    5.78    0.91
   6   7   2    5.74    1.06
   6   7   2    6.65    1.30
   4  -6   5   42.47    2.56
  -4   6  -5   36.19    2.27
   4  -6   5   43.56    2.84
   4   6   5   46.09    3.06
   4   6   5   45.99    2.91
 -13  -1   5    7.00    0.94
   3   8  -2   18.93    1.49
   3   8  -2   19.99    1.57
  -3   8   2   20.23    1.56
  -3   8   2   19.75    1.53
 -10   4   6   18.69    1.40
 -10   4   6   22.39    1.57
  10   4  -6   19.53    1.46
   8   1   6    6.06    0.98
  -2  -4   8   80.11    4.60
  10  -4   3   -0.24    0.84
  10   4   3    1.20    0.89
   1  -6   6    1.13    0.82
  -5   1   9   25.04    1.71
  -5   1   9   23.27    1.72
  -5  -1   9   23.83    1.71
  -5  -1   9   22.46    1.55
   3  -7   4   72.35    4.06
   3   7   4   83.62    4.80
 -11   5   3  192.92   10.67
  11   5  -3  200.14   11.22
 -11   5   3  180.48   10.58
 -11  -5   3  179.05   10.09
  11   5  -3  198.96   11.07
  -4  -4   8   53.04    3.23
  -4  -4   8   52.78    3.10
  -9   6  -1   12.24    1.12
   9   6   1    9.20    1.14
  -7   7   3   -0.22    0.79
  -7   7   3    0.43    0.77
   2   7  -5    2.07    0.81
  14   0  -2   15.85    1.29
   4   8  -1  116.33    6.58
  -4   8   1  125.38    7.02
   3   2   8   -0.36    0.70
   3  -2   8    0.09    0.68
   3   2   8    0.14    0.84
  -6   6  -4   48.14    3.10
   6  -6   4   48.14    2.83
   6   6   4   51.24    3.94
   4   8   0  127.72    7.39
   4   8   0  111.58    6.93
 -13   3   1   30.34    2.19
  13   3  -1   31.21    2.10
 -13   3   1   31.79    2.18
   2   8   2  246.76   14.75
   9   4   4    3.40    0.96
   9  -4   4    2.81    0.91
  -1   1   9   69.65    4.32
  -1   1   9   69.29    3.68
 -13   3   3   21.70    1.65
  13   3  -3   19.61    1.47
 -13   3   3   20.24    1.53
  13   3  -3   21.14    1.62
   7   7   1    0.33    0.85
   7   7   1   -0.46    1.19
  -7   7  -1    0.09    0.82
 -12  -4   0    4.43    1.28
   7  -3   6    0.38    0.61
   7   3   6    0.85    0.81
  -6   7   4   26.72    1.76
   1  -5   7   43.67    2.77
   5   7   3    0.65    1.17
   5   7   3    0.28    0.84
  -5   7  -3    0.90    0.80
  -6   0   9    0.03    0.96
  -6   0   9    0.25    0.74
   3   7  -5   20.01    1.44
   6   5  -7   14.68    1.19
 -12  -2   6    6.57    0.97
  -6   4  -6  140.55    7.79
   6  -4   6  134.72    7.25
   6   4   6  125.13    7.37
   4   0   8    4.46    0.75
   5  -3   7   16.47    1.17
  14   1  -2    2.43    0.82
  14   0  -1   -0.06    0.74
   2   3   8   77.50    4.43
  -9   6   4   34.09    2.17
  -5  -4   8    3.11    0.98
 -10   3   7   -0.18    0.84
  11  -3   3    0.82    0.83
  10   3   4    0.11    0.85
  10  -3   4    0.54    0.71
 -10   5   5    8.88    0.99
  10   5  -5    8.95    0.96
  -6   1   9   25.09    1.70
  -3   2   9   43.15    2.95
  -4   8   2    1.78    0.79
  12   4  -4    3.97    0.85
 -12   4   4    3.50    0.99
;

_shelx_hkl_checksum   53082

#==============================================================================
#     End of CIF
#==============================================================================
