# Supplementary material for: Solid State Structure and Hydrogen Bonding of Some Cyclic NH Carboximides
Source: MDPI journal article supplement (doi:10.3390/cryst13010150), 2023-01-15
Supplement: s1 [file s1 › 10.cif]

data_10
# start Validation Reply Form
_vrf_PLAT939_10
;
PROBLEM: Large Value of Not (SHELXL) Weight Optimized S .     230.07 Check 
RESPONSE: No obvious outliers.
;
# end Validation Reply Form

_audit_creation_date                               2020-08-27
_audit_creation_method                            'by CrystalStructure 4.3'

_publ_section_references
;
    ENTER OTHER REFERENCES

    Rigaku (2018). CrystalStructure. Version 4.3. 
    Rigaku Corporation, Tokyo, Japan.

    Sheldrick, G. M. (2014). Acta Cryst. (2014). A70, C1437.
    SHELXT Version 2018/2

    Sheldrick, G.M. (2008) SHELXL Version 2018/3, Acta Cryst. A64, 112-122.

    Rigaku (1998). REQAB. 
    Rigaku Corporation, Tokyo, Japan.

;


_chemical_formula_sum                             'C6 H9 N O2'
_chemical_formula_moiety                          'C6 H9 N O2'
_chemical_formula_weight                           127.14
_chemical_melting_point                            ?

#==============================================================================
# CRYSTAL DATA
_space_group_crystal_system                        monoclinic
_space_group_name_H-M_alt                         'P 1 21/c 1'
_space_group_name_Hall                            '-P 2ybc'
_space_group_IT_number                             14
loop_
_space_group_symop_id
_space_group_symop_operation_xyz
1   '+X,+Y,+Z'
2   '-X,1/2+Y,1/2-Z'
3   '-X,-Y,-Z'
4   '+X,-1/2-Y,-1/2+Z'
#------------------------------------------------------------------------------
_cell_length_a                                     10.231(4)
_cell_length_b                                     5.949(2)
_cell_length_c                                     10.412(4)
_cell_angle_alpha                                  90.0000
_cell_angle_beta                                   95.784(8)
_cell_angle_gamma                                  90.0000
_cell_volume                                       630.5(4)
_cell_formula_units_Z                              4
_cell_measurement_reflns_used                      1827
_cell_measurement_theta_min                        2.00
_cell_measurement_theta_max                        27.40
_cell_measurement_temperature                      93
#------------------------------------------------------------------------------
_exptl_crystal_description                         prism
_exptl_crystal_colour                              colorless
_exptl_crystal_size_max                            0.100
_exptl_crystal_size_mid                            0.100
_exptl_crystal_size_min                            0.030
_exptl_crystal_density_diffrn                      1.339
_exptl_crystal_density_meas                        ?
_exptl_crystal_density_method                     'not measured'
_exptl_crystal_F_000                               272.00
_exptl_absorpt_coefficient_mu                      0.101
_exptl_absorpt_correction_type                     multi-scan
_exptl_absorpt_process_details                    'REQAB (Rigaku, 1998)'
_exptl_absorpt_correction_T_min                    0.457
_exptl_absorpt_correction_T_max                    0.997

#==============================================================================
# EXPERIMENTAL DATA

_diffrn_ambient_temperature                        93
_diffrn_radiation_type                            'Mo K\a'
_diffrn_radiation_wavelength                       0.71075
_diffrn_measurement_device_type                   'Rigaku XtaLAB P200'
_diffrn_measurement_method                         \w
_diffrn_detector_area_resol_mean                   5.814
_diffrn_reflns_number                              3953
_diffrn_reflns_av_unetI/netI                       0.0262
_diffrn_reflns_av_R_equivalents                    0.0300
_diffrn_reflns_theta_max                           25.339
_diffrn_reflns_theta_min                           2.001
_diffrn_reflns_theta_full                          25.242
_diffrn_measured_fraction_theta_max                0.993
_diffrn_measured_fraction_theta_full               0.995
_diffrn_reflns_Laue_measured_fraction_max          0.993
_diffrn_reflns_Laue_measured_fraction_full         0.995
_diffrn_reflns_point_group_measured_fraction_max   0.993
_diffrn_reflns_point_group_measured_fraction_full  0.995
_diffrn_reflns_limit_h_min                        -10
_diffrn_reflns_limit_h_max                         12
_diffrn_reflns_limit_k_min                        -5
_diffrn_reflns_limit_k_max                         7
_diffrn_reflns_limit_l_min                        -11
_diffrn_reflns_limit_l_max                         12
_diffrn_standards_number                           0
_diffrn_standards_interval_count                   .
_diffrn_standards_decay_%                          ?
_reflns_number_total                               1145
_reflns_number_gt                                  1067
_reflns_threshold_expression                       F^2^>2.0\s(F^2^)
_reflns_Friedel_coverage          0.000
_reflns_Friedel_fraction_max      .
_reflns_Friedel_fraction_full     .

#==============================================================================
# REFINEMENT DATA

_refine_special_details
;
    Refinement was performed using all reflections. The weighted 
    R-factor (wR) and goodness of fit (S) are based on F^2^.
    R-factor (gt) are based on F. The threshold expression of
    F^2^ > 2.0 sigma(F^2^) is used only for calculating R-factor (gt).
;
_refine_ls_structure_factor_coef                   Fsqd
_refine_ls_R_factor_all                            0.0615
_refine_ls_R_factor_gt                             0.0461
_refine_ls_wR_factor_ref                           0.2137
_refine_ls_wR_factor_gt                            0.1488
_refine_ls_number_restraints                       1
_refine_ls_hydrogen_treatment                      mixed
_refine_ls_number_reflns                           1145
_refine_ls_number_parameters                       87
_refine_ls_goodness_of_fit_ref                     1.090
_refine_ls_weighting_scheme                        calc
_refine_ls_weighting_details
                   'w = 1/[\s^2^(Fo^2^)+(0.1911P)^2^] where P=(Fo^2^+2Fc^2^)/3'
_atom_sites_solution_hydrogens                     geom
_atom_sites_solution_primary                       direct
_atom_sites_solution_secondary                     difmap
_refine_ls_shift/su_max                            0.000
_refine_diff_density_max                           0.49
_refine_diff_density_min                          -0.62
_refine_ls_extinction_method                       none
_refine_ls_extinction_coef                         ?

loop_
_atom_type_symbol
_atom_type_description
_atom_type_scat_dispersion_real
_atom_type_scat_dispersion_imag
_atom_type_scat_source
  'C' 'C'  0.0033 0.0016 
;
International Tables for Crystallography
(Vol. C, Tables 4.2.6.8 and 6.1.1.4)
;
  'H' 'H'  0.0000 0.0000 
;
International Tables for Crystallography
(Vol. C, Table 6.1.1.4)
;
  'N' 'N'  0.0061 0.0033 
;
International Tables for Crystallography
(Vol. C, Tables 4.2.6.8 and 6.1.1.4)
;
  'O' 'O'  0.0106 0.0060 
;
International Tables for Crystallography
(Vol. C, Tables 4.2.6.8 and 6.1.1.4)
;

#==============================================================================
# ATOMIC COORDINATES AND THERMAL PARAMETERS

loop_
 _atom_site_label
 _atom_site_type_symbol
 _atom_site_fract_x
 _atom_site_fract_y
 _atom_site_fract_z
 _atom_site_U_iso_or_equiv
 _atom_site_adp_type
 _atom_site_occupancy
 _atom_site_site_symmetry_order  
 _atom_site_calc_flag
 _atom_site_refinement_flags_posn
 _atom_site_refinement_flags_adp
 _atom_site_refinement_flags_occupancy
 _atom_site_disorder_assembly
 _atom_site_disorder_group
O2 O 0.49366(10) 0.72270(17) 0.11806(9) 0.0170(5) Uani 1 1 d . . . . .
O6 O 0.78368(11) 0.15117(17) 0.12657(10) 0.0192(5) Uani 1 1 d . . . . .
N1 N 0.64383(12) 0.44408(19) 0.12368(11) 0.0130(5) Uani 1 1 d D . . . .
C2 C 0.59302(14) 0.6372(2) 0.17325(13) 0.0122(5) Uani 1 1 d . . . . .
C3 C 0.66372(15) 0.7296(2) 0.29587(12) 0.0136(5) Uani 1 1 d . . . . .
H3A H 0.624945 0.664404 0.370873 0.016 Uiso 1 1 calc R U . . .
H3B H 0.651273 0.894522 0.298034 0.016 Uiso 1 1 calc R U . . .
C4 C 0.81072(14) 0.6769(2) 0.30700(12) 0.0123(5) Uani 1 1 d . . . . .
H4 H 0.849274 0.749032 0.232683 0.015 Uiso 1 1 calc R U . . .
C5 C 0.82733(15) 0.4232(2) 0.29671(13) 0.0153(5) Uani 1 1 d . . . . .
H5A H 0.921858 0.388044 0.296276 0.018 Uiso 1 1 calc R U . . .
H5B H 0.796249 0.351011 0.373724 0.018 Uiso 1 1 calc R U . . .
C6 C 0.75322(15) 0.3259(2) 0.17730(13) 0.0132(5) Uani 1 1 d . . . . .
C7 C 0.88154(15) 0.7694(3) 0.43209(13) 0.0157(5) Uani 1 1 d . . . . .
H7A H 0.870530 0.932926 0.434482 0.019 Uiso 1 1 calc R U . . .
H7B H 0.975264 0.732904 0.435954 0.019 Uiso 1 1 calc R U . . .
H7C H 0.844263 0.701656 0.506070 0.019 Uiso 1 1 calc R U . . .
H1 H 0.5998(17) 0.384(3) 0.0438(10) 0.019(4) Uiso 1 1 d D . . . .

loop_
 _atom_site_aniso_label
 _atom_site_aniso_U_11
 _atom_site_aniso_U_22
 _atom_site_aniso_U_33
 _atom_site_aniso_U_23
 _atom_site_aniso_U_13
 _atom_site_aniso_U_12
O2 0.0135(7) 0.0180(8) 0.0186(7) -0.0025(4) -0.0027(5) 0.0029(4)
O6 0.0226(8) 0.0162(8) 0.0189(8) -0.0035(4) 0.0020(5) 0.0055(4)
N1 0.0129(8) 0.0137(8) 0.0123(8) -0.0026(5) 0.0004(5) 0.0002(5)
C2 0.0112(8) 0.0115(9) 0.0142(8) 0.0004(5) 0.0029(6) -0.0023(5)
C3 0.0131(9) 0.0137(9) 0.0137(8) -0.0034(6) 0.0003(6) 0.0008(5)
C4 0.0122(9) 0.0140(9) 0.0106(8) 0.0007(5) 0.0004(6) 0.0000(5)
C5 0.0147(9) 0.0168(10) 0.0141(9) 0.0003(6) -0.0005(6) 0.0038(6)
C6 0.0155(9) 0.0129(9) 0.0117(8) 0.0022(5) 0.0036(6) 0.0002(5)
C7 0.0155(9) 0.0169(10) 0.0138(8) 0.0006(5) -0.0026(6) -0.0014(5)

#==============================================================================
_computing_data_collection
                                'CrystalClear-SM Expert 2.1 b45 (Rigaku, 2015)'
_computing_cell_refinement
                                               'CrystalClear-SM Expert 2.1 b45'
_computing_data_reduction
                                               'CrystalClear-SM Expert 2.1 b45'
_computing_structure_solution
                                      'SHELXT Version 2018/2 (Sheldrick, 2014)'
_computing_structure_refinement
                                      'SHELXL Version 2018/3 (Sheldrick, 2008)'
_computing_publication_material
                                          'CrystalStructure 4.3 (Rigaku, 2018)'
_computing_molecular_graphics                     'CrystalStructure 4.3'

#==============================================================================
# MOLECULAR GEOMETRY

_geom_special_details
;
 All esds (except the esd in the dihedral angle between two l.s. planes)
 are estimated using the full covariance matrix.  The cell esds are taken
 into account individually in the estimation of esds in distances, angles
 and torsion angles; correlations between esds in cell parameters are only
 used when they are defined by crystal symmetry.  An approximate (isotropic)
 treatment of cell esds is used for estimating esds involving l.s. planes.
;

loop_
 _geom_bond_atom_site_label_1
 _geom_bond_atom_site_label_2
 _geom_bond_distance
 _geom_bond_site_symmetry_2
 _geom_bond_publ_flag
O2 C2 1.2267(18) . ?
O6 C6 1.2204(18) . ?
N1 C2 1.3820(18) . ?
N1 C6 1.3904(19) . ?
N1 H1 0.973(5) . ?
C2 C3 1.506(2) . ?
C3 C4 1.529(2) . ?
C3 H3A 0.9900 . ?
C3 H3B 0.9900 . ?
C4 C5 1.524(2) . ?
C4 C7 1.5276(19) . ?
C4 H4 1.0000 . ?
C5 C6 1.5054(19) . ?
C5 H5A 0.9900 . ?
C5 H5B 0.9900 . ?
C7 H7A 0.9800 . ?
C7 H7B 0.9800 . ?
C7 H7C 0.9800 . ?

loop_
 _geom_angle_atom_site_label_1
 _geom_angle_atom_site_label_2
 _geom_angle_atom_site_label_3
 _geom_angle
 _geom_angle_site_symmetry_1
 _geom_angle_site_symmetry_3
 _geom_angle_publ_flag
C2 N1 C6 126.04(12) . . ?
C2 N1 H1 117.8(11) . . ?
C6 N1 H1 116.1(11) . . ?
O2 C2 N1 119.67(13) . . ?
O2 C2 C3 123.37(13) . . ?
N1 C2 C3 116.95(13) . . ?
C2 C3 C4 111.97(12) . . ?
C2 C3 H3A 109.2 . . ?
C4 C3 H3A 109.2 . . ?
C2 C3 H3B 109.2 . . ?
C4 C3 H3B 109.2 . . ?
H3A C3 H3B 107.9 . . ?
C5 C4 C7 111.71(12) . . ?
C5 C4 C3 108.27(12) . . ?
C7 C4 C3 111.67(12) . . ?
C5 C4 H4 108.4 . . ?
C7 C4 H4 108.4 . . ?
C3 C4 H4 108.4 . . ?
C6 C5 C4 112.88(12) . . ?
C6 C5 H5A 109.0 . . ?
C4 C5 H5A 109.0 . . ?
C6 C5 H5B 109.0 . . ?
C4 C5 H5B 109.0 . . ?
H5A C5 H5B 107.8 . . ?
O6 C6 N1 119.16(12) . . ?
O6 C6 C5 123.77(13) . . ?
N1 C6 C5 117.07(12) . . ?
C4 C7 H7A 109.5 . . ?
C4 C7 H7B 109.5 . . ?
H7A C7 H7B 109.5 . . ?
C4 C7 H7C 109.5 . . ?
H7A C7 H7C 109.5 . . ?
H7B C7 H7C 109.5 . . ?

loop_
 _geom_torsion_atom_site_label_1
 _geom_torsion_atom_site_label_2
 _geom_torsion_atom_site_label_3
 _geom_torsion_atom_site_label_4
 _geom_torsion
 _geom_torsion_site_symmetry_1
 _geom_torsion_site_symmetry_2
 _geom_torsion_site_symmetry_3
 _geom_torsion_site_symmetry_4
 _geom_torsion_publ_flag
C6 N1 C2 O2 -178.26(13) . . . . ?
C6 N1 C2 C3 0.8(2) . . . . ?
O2 C2 C3 C4 -150.94(14) . . . . ?
N1 C2 C3 C4 30.04(17) . . . . ?
C2 C3 C4 C5 -56.12(15) . . . . ?
C2 C3 C4 C7 -179.51(11) . . . . ?
C7 C4 C5 C6 177.28(12) . . . . ?
C3 C4 C5 C6 53.92(16) . . . . ?
C2 N1 C6 O6 176.45(12) . . . . ?
C2 N1 C6 C5 -3.3(2) . . . . ?
C4 C5 C6 O6 154.79(14) . . . . ?
C4 C5 C6 N1 -25.47(19) . . . . ?

loop_
_geom_hbond_atom_site_label_D
_geom_hbond_atom_site_label_H
_geom_hbond_atom_site_label_A
_geom_hbond_site_symmetry_D
_geom_hbond_site_symmetry_H
_geom_hbond_site_symmetry_A
_geom_hbond_distance_DA
_geom_hbond_distance_DH
_geom_hbond_distance_HA
_geom_hbond_angle_DHA
_geom_hbond_publ_flag
N1 H1 O2 . . 3_665 2.9300(17) 0.973(13) 1.957(13) 177.0(16) no

#==============================================================================
# Additional structures and associated data_? identifiers
# should be added at this point if there is more than one 
# structure analysis in the CIF.

_shelx_res_file
;
TITL DSAA20
    shelxl.res
    created by SHELXL-2018/3 at 15:17:32 on 27-Aug-2020
CELL  0.71075 10.23100 5.94900 10.41200 90.00000 95.78400 90.00000
ZERR  4 0.00400 0.00200 0.00400 0.00000 0.00800 0.00000
LATT 1
SYMM    -X, .50+Y, .50-Z
SFAC C H N O
UNIT 24 36 4 8
OMIT     2   0   0
OMIT     0   2   0
L.S. 20
FMAP 2
PLAN 5
WPDB -2
HTAB
BOND $H
CONF
LIST 4
TEMP -180.0
ACTA
SIZE 0.030 0.100 0.100
DFIX 0.9800 0.0050 N1 H1
WGHT    0.191100
FVAR       2.57826
O2    4    0.493662    0.722704    0.118063    11.00000    0.01349    0.01799 =
         0.01864   -0.00248   -0.00271    0.00287
O6    4    0.783678    0.151165    0.126574    11.00000    0.02262    0.01616 =
         0.01886   -0.00353    0.00198    0.00551
N1    3    0.643825    0.444083    0.123680    11.00000    0.01292    0.01369 =
         0.01225   -0.00257    0.00040    0.00017
C2    1    0.593015    0.637157    0.173255    11.00000    0.01120    0.01150 =
         0.01421    0.00042    0.00289   -0.00234
C3    1    0.663723    0.729584    0.295867    11.00000    0.01307    0.01370 =
         0.01368   -0.00339    0.00027    0.00079
AFIX  23
H3A   2    0.624945    0.664404    0.370873    11.00000   -1.20000
H3B   2    0.651273    0.894522    0.298034    11.00000   -1.20000
AFIX   0
C4    1    0.810720    0.676914    0.307005    11.00000    0.01224    0.01402 =
         0.01062    0.00070    0.00041    0.00005
AFIX  13
H4    2    0.849274    0.749032    0.232683    11.00000   -1.20000
AFIX   0
C5    1    0.827328    0.423243    0.296712    11.00000    0.01470    0.01678 =
         0.01405    0.00030   -0.00053    0.00378
AFIX  23
H5A   2    0.921858    0.388044    0.296276    11.00000   -1.20000
H5B   2    0.796249    0.351011    0.373724    11.00000   -1.20000
AFIX   0
C6    1    0.753223    0.325863    0.177304    11.00000    0.01554    0.01295 =
         0.01168    0.00225    0.00365    0.00017
C7    1    0.881541    0.769387    0.432088    11.00000    0.01546    0.01688 =
         0.01385    0.00058   -0.00257   -0.00137
AFIX 137
H7A   2    0.870530    0.932926    0.434482    11.00000   -1.20000
H7B   2    0.975264    0.732904    0.435954    11.00000   -1.20000
H7C   2    0.844263    0.701656    0.506070    11.00000   -1.20000
AFIX   0
H1    2    0.599821    0.383712    0.043823    11.00000    0.01917
HKLF 4


REM  DSAA20
REM wR2 = 0.2137, GooF = S = 1.090, Restrained GooF = 1.090 for all data
REM R1 = 0.0461 for 1067 Fo > 4sig(Fo) and 0.0615 for all 1145 data
REM 87 parameters refined using 1 restraints

END

WGHT      0.1827      0.0000

REM Instructions for potential hydrogen bonds
EQIV $1 -x+1, y+1/2, -z+1/2
HTAB C3 O2_$1
EQIV $2 x, -y+1/2, z+1/2
HTAB C5 O6_$2
EQIV $3 -x+1, -y+1, -z
HTAB N1 O2_$3

REM Highest difference peak  0.495,  deepest hole -0.619,  1-sigma level  0.182
Q1    1   0.6381  0.7170  0.2442  11.00000  0.05    0.49
Q2    1   0.5383  0.2311  0.1536  11.00000  0.05    0.49
Q3    1   0.8182  0.5477  0.2945  11.00000  0.05    0.47
Q4    1   0.7548  0.1282  0.0245  11.00000  0.05    0.45
Q5    1   0.8428  1.1371  0.4213  11.00000  0.05    0.42
;

_shelx_res_checksum   38281

_shelx_hkl_file
;
   1   0   0 5994.07  205.18
   1   0   0 6642.18  225.71
   1   0  -1    0.23    2.00
  -1   0   1    1.19    4.64
   1   0  -1    0.49    3.46
  -1   0   1    0.08    1.90
  -1   0  -1   -0.13    1.32
   1   0   1    0.40    2.13
  -1   0  -1   -0.19    1.43
   1   0   1   20.00    4.64
   0  -1   0    0.14    2.12
   0   0   221890.73  713.22
   0   0   222122.15  719.92
   0   0   222165.53  721.92
   0   1   1 1163.42   45.23
   0  -1  -1 1138.31   44.22
   0  -1   1  777.25   32.46
   0  -1   1  952.20   40.68
   1  -1   0  150.56   10.28
  -1  -1   0  155.94   10.49
  -1  -1   0  154.28   10.98
  -2   0   0 5238.48  180.66
   1   0  -2  639.25   28.11
  -1   0   2  640.61   27.68
  -2   0   1   -0.15    3.40
   2   0  -1    6.50    3.78
   2   0  -1   -0.36    2.52
  -2   0   1    1.07    3.42
  -1   1   127905.40  910.79
   1   1  -123039.12  757.69
   1  -1  -128274.34  917.51
  -1   1  -1   -0.32    2.70
  -1   1  -1    0.78    2.27
  -1   0  -2 7184.23  241.01
   1   0   2 7917.40  263.59
   1   0   2 8350.01  277.09
  -1   0  -2 6947.66  231.97
   2   0   1   -0.19    2.44
   2   0   1    0.75    3.25
  -2   0  -1    0.29    2.76
  -2   0  -1    0.54    2.88
   0   1   210238.11  339.92
   0   1   210255.42  341.00
   0  -1   210190.42  337.91
   0   1   210087.87  332.87
   0  -1   2 9940.01  330.10
   0  -1  -210197.52  335.89
  -2  -1   0  148.15   10.68
  -2  -1   0  140.64   10.35
   2  -1   0  144.46   10.96
   2  -1   0  138.30   10.27
  -2   0   248952.95 1584.91
  -2   0   249352.75 1597.15
   2   0  -240874.44 1326.92
  -1   1   214392.81  471.09
   1  -1  -214735.83  483.64
   1   1  -214368.71  470.24
  -1  -1   214541.71  475.32
  -1   1   214911.31  488.16
   1   1  -214578.07  593.68
  -1  -1   214060.83  463.64
   2   1  -1 4201.20  147.49
  -2   1   1 4771.14  164.17
  -2  -1   1 4756.19  162.48
  -2  -1   1 5041.55  174.16
   2  -1  -1 4761.65  161.19
  -1   1  -2   -0.02    1.34
   2  -1   1   78.12    8.91
   2  -1   1   79.34   11.15
  -2  -1  -1   79.25    7.64
   2   1   1   76.95    7.62
  -2  -1  -1   80.79    7.30
  -2   1  -1   82.38    8.40
  -2   1  -1   72.63   11.51
   2   0   2  286.76   15.80
   2   0   2  274.70   16.31
   0   0   3    0.19    1.93
   0   0   3   -0.17    1.90
   0   0   3    0.37    2.12
  -3   0   019108.23  626.02
  -3   0   017218.26  565.75
   3   0   016256.95  534.66
   3   0   017006.92  559.26
  -1   0   3    1.85    2.46
  -3   0   1    0.67    3.67
   3   0  -1    0.57    3.03
  -3   0   1   -0.36    2.92
   3   0  -1    0.11    2.75
  -2   1   265392.58 1650.36
  -2  -1   261284.13 2033.48
   1   0   3   -0.26    1.88
  -1   0  -3   -0.08    2.00
   1   0   3   -0.15    1.52
  -1   0  -3    0.89    2.49
   1   0   3   -0.12    2.28
  -3   0  -1    1.33    3.12
   3   0   1    0.33    3.17
  -3   0  -1   -0.05    2.74
   3   0   1    0.61    2.82
  -2   0   3   -0.23    2.60
  -2   0   3    0.22    2.27
   2   1   2 7400.13  247.61
   2   1   2 7480.50  249.09
  -2  -1  -2 7615.71  253.09
  -2   1  -2 7110.44  242.49
  -2   1  -2 7488.54  249.48
   2  -1   2 7213.82  241.96
   2  -1   2 7386.84  250.84
  -2  -1  -2 7529.78  251.14
   0   1   3    0.26    2.28
   0   1   3    0.10    1.91
   0  -1   3    1.86    2.57
   0   1   3    7.27    3.48
   0  -1   3    0.40    2.38
   0  -1   3   -0.28    1.78
   3   0  -2 3275.26  113.85
  -3   0   2 3257.03  115.25
  -3   0   2 3376.68  118.12
   0   2   0  459.15   22.05
  -3  -1   015943.77  523.17
   3  -1   016110.88  529.27
   3  -1   015220.75  502.79
  -3  -1   016877.79  552.35
  -1   1   312848.08  422.32
  -1  -1   311889.12  406.57
   1  -1  -312521.23  418.50
   1   1  -312320.30  408.32
  -1  -1   312350.62  407.37
  -1   1   312416.74  409.00
   3  -1  -1  534.93   24.69
   3  -1  -1  555.90   25.24
  -3  -1   1  532.67   25.52
  -3   1   1  563.45   26.45
  -3  -1   1  568.26   27.88
   0  -2  -1  871.79   35.26
   0   2  -1  803.44   33.30
   0   2   1  775.96   32.52
   0   2   1  788.79   33.73
   0   2  -1  666.42   32.79
   1  -2   0  354.14   18.01
  -1   2   0  265.59   14.81
   1   2   0  324.28   17.35
  -1  -2   0  345.43   17.76
  -1   2   0  359.39   18.39
   1   2   0  358.31   18.30
   1  -2   0  364.80   18.21
  -1   1  -3   -0.03    1.13
  -1  -2   1  324.94   16.77
   1   2  -1  360.84   20.84
  -1   2   1  334.33   17.35
   1  -2  -1  321.33   16.99
  -1   2   1  316.76   17.06
   1  -2  -1  322.74   16.72
   1   2  -1  333.32   17.98
   3  -1   1 7529.74  257.28
  -3   1  -1 7065.11  237.96
  -3  -1  -1 7077.65  235.60
   3  -1   1 7499.05  252.38
  -3   1  -1 6981.63  236.67
   3   1   1 7230.78  243.07
  -3  -1  -1 6927.04  231.34
  -1  -2  -1 3005.55  105.60
  -1  -2  -1 3242.51  111.72
   1  -2   1 3025.97  105.63
   1  -2   1 3104.37  107.87
   1   2   1 3050.17  106.64
   2   0   3    0.20    2.43
  -2   0  -3    0.18    1.91
  -2   0  -3    0.70    2.39
   2   0   3    0.35    2.10
   3   0   2 2726.46   96.77
   3   0   2 2753.94   99.36
  -2  -1   3 1550.99   57.61
  -2  -1   3 1555.85   61.02
   2  -1  -3 1558.56   58.35
  -2   1   3 1583.56   58.41
   2   1  -3 1485.96   56.44
   2   1  -3 1521.47   57.09
   3  -1  -2 3035.52  106.74
   3   1  -2 3193.00  113.05
  -3   1   2 2663.50   94.18
   3   1  -2 2929.99  108.52
  -3  -1   2 3185.02  113.89
  -3  -1   2 3168.79  112.84
  -3   1   2 3067.68  107.76
   0   0   420972.36  843.22
   0   0   423079.29  760.94
   0   0   422865.21  779.80
   0   2   2  332.35   17.95
   0  -2  -2  336.31   17.22
   0   2   2  326.03   17.12
   0   2   2  315.03   16.76
  -1   0   4 5455.29  184.02
  -2   2   0  102.26    8.41
   2   2   0  113.66    9.52
  -2   2   0  107.00    9.47
   2  -2   0  104.18    8.21
  -2   2   0  105.40    8.81
  -2  -2   0  107.67    8.35
   2   2   0  102.20    8.75
  -2  -2   0  112.61    9.20
  -3   0   3    0.97    2.52
  -3   0   3    0.82    2.71
   3   0  -3    0.43    2.29
  -4   0   0  964.30   41.42
   4   0   0  936.46   40.66
  -4   0   0  932.27   39.99
   4   0   0  913.00   40.16
   4   0  -1   15.46    4.45
   4   0  -1    0.32    2.79
  -4   0   1    0.73    3.42
  -4   0   1    0.51    3.35
   1  -2  -2 4615.60  157.84
  -1  -2   2 4801.70  164.56
   1  -2  -2 5004.45  169.03
   1   2  -2 4416.15  152.64
  -1   2   2 4536.68  154.13
   1   2  -2 4709.80  160.05
  -2  -2   1 3563.71  123.47
   2   2  -1 3334.50  122.98
  -2   2   1 3288.85  114.17
   2  -2  -1 3459.06  120.21
  -2  -2   1 3447.45  119.57
  -2   2   1 3472.65  119.81
   2   2  -1 3495.61  125.15
  -2   1  -313047.24  428.43
   2  -1   312797.35  590.16
   2   1   313747.64  454.74
  -2   1  -314054.19  463.00
   2  -1   314066.60  465.55
  -2  -1  -312951.70  424.99
   2   1   313281.46  439.16
  -2  -1  -314011.62  460.18
  -2   1  -313638.67  451.27
  -1   2  -2    2.97    2.25
   1  -2   2    9.83    4.79
   1   2   2    8.39    2.96
  -1   2  -2   -0.15    1.39
   1  -2   2    7.49    2.60
  -1  -2  -2    8.78    3.03
  -1  -2  -2    7.26    3.04
   1   2   2    6.99    2.83
   3   1   2 1477.05   55.82
  -3  -1  -2 1369.55   52.31
  -3   1  -2 1402.03   53.61
   3  -1   2 1428.75   56.30
  -3   1  -2 1379.70   55.08
  -3  -1  -2 1419.19   53.13
   3   1   2 1475.91   57.30
   3  -1   2 1349.59   54.14
  -2  -2  -1  816.84   33.57
   2  -2   1  805.58   33.81
  -2  -2  -1  947.94   39.45
   2   2   1  805.56   33.60
  -2   2  -1  873.58   39.11
  -2   2  -1  818.42   34.62
  -2   2  -1  812.95   33.94
   1   0   411959.56  396.76
   1   0   411229.95  373.23
  -1   0  -410177.20  338.94
  -1   0  -411020.44  363.00
   1   0   410544.80  350.34
  -4   0  -1    0.54    2.68
   4   0   1    0.83    3.25
  -4   0  -1   -0.31    2.87
   4   0   1   -0.19    2.62
  -2   0   4   69.53    7.64
  -4   0   2  398.93   21.69
  -4   0   2  374.52   20.50
   4   0  -2  408.76   20.53
   0  -1   4  379.25   18.96
   0   1   4  378.05   19.53
   0   1   4  367.98   18.63
   0  -1   4  390.06   19.80
   0   1   4  367.02   18.64
   0  -1   4  373.24   18.87
  -1   1   4 1933.61   70.34
  -1  -1   4 1850.66   68.31
  -1  -1   4 1810.94   66.72
   1   1  -4 1574.18   60.34
  -1   1   4 1849.93   67.24
   1  -1  -4 1869.03   68.67
  -2  -2   2    0.72    2.40
  -2   2   2    0.88    2.21
   2  -2  -2    0.30    2.23
   2   2  -2   -0.18    2.28
   2   2  -2    0.16    2.22
  -2  -2   2    0.12    1.69
  -3   1   311068.34  365.66
   3   1  -310905.28  360.78
   3  -1  -311142.19  367.42
   3   1  -310744.41  356.55
  -3   1   311228.92  371.01
  -3  -1   310500.98  355.36
  -3  -1   311705.74  386.05
   4  -1   0 1449.77   56.03
  -4  -1   0 1424.93   54.81
  -4   1   0 1216.66   50.17
  -4  -1   0 1421.90   54.50
   4  -1   0 1426.62   55.72
  -4   1   1  355.59   19.72
   4  -1  -1  323.35   17.39
   4  -1  -1  339.70   18.03
  -4  -1   1  334.15   18.60
  -4  -1   1  327.44   18.93
   3   0   3   -0.27    2.28
  -3   0  -3   -0.15    1.79
   3   0   3   -0.49    2.63
   2   2   2 5372.39  182.68
  -2  -2  -2 5434.55  183.22
  -2  -2  -2 5418.40  182.60
  -2   2  -2 5493.66  188.63
  -2   2  -2 5490.84  186.17
   2   2   2 5064.77  171.82
   2  -2   2 5527.19  190.13
   0   2   3  468.09   22.05
   0  -2  -3  487.37   22.40
   0  -2   3  466.94   21.57
   0   2   3  445.18   21.32
   0  -2   3  460.82   21.37
  -4  -1  -1 4196.33  116.28
   4   1   1 4279.01  148.82
   4  -1   1 4286.42  123.74
  -4   1  -1 4212.92  118.38
  -4  -1  -1 4332.21  147.42
   4  -1   1 4265.55  120.48
  -4   1  -1 4170.72  119.30
  -3  -2   0 7172.56  191.27
  -3  -2   0 7116.19  189.00
  -3   2   0 6873.86  184.20
   3   2   0 6716.12  184.62
   3   2   0 7233.55  194.90
  -3   2   0 6459.82  175.20
   3  -2   0 6783.57  180.53
  -3   2   0 7082.71  195.48
   2  -1  -4 4660.15  128.87
  -2   1   4 4600.55  126.75
  -2  -1   4 4484.56  126.91
  -2  -1   4 4506.04  122.66
  -2   1   4 4639.26  126.37
   2   1  -4 4469.99  125.21
   1  -2  -3    0.85    1.80
   1   2  -3    1.07    3.48
  -1  -2   3    0.66    2.07
   1   2  -3    0.56    1.72
  -1   2   3    1.23    2.24
  -1   2   3    1.45    2.10
   1  -2  -3    0.85    2.30
  -2   0  -4   24.19    4.13
   2   0   4   24.67    4.31
   2   0   4   24.39    4.01
  -2   0  -4   24.88    4.31
  -2   0  -4   24.94    4.27
  -3  -2   1 1477.06   46.97
  -3   2   1 1489.65   48.34
   3  -2  -1 1413.36   44.63
  -3   2   1 1449.68   46.61
   3   2  -1 1430.56   47.69
  -3  -2   1 1551.86   49.23
   3   2  -1 1478.87   51.16
   4   1  -2 1464.99   48.26
   4  -1  -2 1507.34   47.48
   4  -1  -2 1525.59   48.74
  -4   1   2 1506.46   49.11
   4   1  -2 1402.51   48.73
  -4  -1   2 1846.82   59.00
  -4  -1   2 1489.94   50.33
   4   0   2  120.81    9.72
   4   0   2  123.56   10.49
  -1   2  -3    0.16    0.88
  -3   0   4 4692.36  127.03
  -3   0   4 4690.82  128.87
   3  -2   1  415.07   18.94
  -3   2  -1  398.23   19.74
  -3   2  -1  431.34   22.16
   3  -2   1  371.65   18.10
  -3  -2  -1  389.41   17.19
  -3   2  -1  400.61   18.24
  -3  -2  -1  414.95   18.71
   3   2   1  388.27   18.33
  -4   0   3   -0.46    2.70
  -4   0   3    0.33    2.81
   4   0  -3    0.14    2.43
   3   1   3 1936.82   59.74
   3   1   3 1942.59   58.75
   3  -1   3 1849.01   59.94
  -3   1  -3 1887.36   57.68
  -3  -1  -3 1960.34   58.94
   3  -1   3 1908.60   58.85
  -3   1  -3 1897.42   59.23
   2   2  -3  777.63   28.52
   2  -2  -3  770.41   28.43
   2   2  -3  763.28   31.59
  -2  -2   3  796.05   29.36
  -2  -2   3  805.62   31.85
  -2   2   3  727.28   26.67
  -3   2   2  258.96   13.68
  -3   2   2  245.64   13.42
   3   2  -2  261.87   15.39
   3   2  -2  257.24   15.74
   3  -2  -2  259.37   13.57
  -3   2   2  227.14   12.98
  -3  -2   2  246.22   13.32
  -3  -2   2  251.84   14.85
   2  -1   4 4237.90  117.33
   2   1   4 4229.27  117.22
   2  -1   4 4224.56  119.97
  -2  -1  -4 4382.32  120.36
  -2  -1  -4 4470.95  122.93
  -2   1  -4 4427.54  122.20
  -2   1  -4 4283.45  119.45
   2   1   4 4302.74  119.61
   0   0   5    0.71    1.92
   0   0   5    0.39    1.88
   0   0   5    1.27    2.29
   0   0   5    0.73    2.36
   1   0  -5   -0.49    2.23
  -1   0   5    0.43    2.04
  -1   0   5    2.41    2.09
  -4   1  -2  982.77   36.79
   4   1   2 1016.30   36.60
  -4  -1  -2 1019.82   35.07
   4  -1   2 1064.52   39.70
  -4   1  -2 1006.54   35.12
   4   1   2 1029.33   36.28
  -4  -1  -2 1039.58   34.81
   4  -1   2 1005.89   37.29
  -5   0   1   -1.44    2.38
   5   0  -1   -0.66    2.31
  -5   0   1   -0.57    2.99
   5   0  -1    7.96    3.72
  -3  -1   4  553.09   22.32
   3   1  -4  556.34   23.34
  -3  -1   4  544.49   24.86
  -3   1   4  575.15   23.60
  -3   1   4  565.89   22.08
   3   1  -4  543.47   22.27
   3  -1  -4  559.43   22.79
  -5   0   0 3109.21   90.92
   5   0   0 3204.50   94.90
   5   0   0 3203.19   95.05
  -5   0   0 3271.22   95.78
  -4   1   3  738.64   28.17
   4   1  -3  722.84   29.16
  -4  -1   3  735.62   30.22
   4   1  -3  682.82   26.37
  -4   1   3  771.05   28.53
  -4  -1   3  714.49   28.94
   4  -1  -3  710.78   26.60
   2  -2   3   11.24    3.24
   2   2   3   10.17    3.14
  -2  -2  -3    9.77    3.17
  -2   2  -3   10.84    3.56
   2  -2   3   10.18    3.38
  -2  -2  -3    9.59    2.98
  -2   2  -3   10.42    2.94
   3   2   2 8582.37  228.86
   3  -2   2 8626.38  232.23
  -3   2  -2 8669.97  234.87
   3  -2   2 8601.30  231.01
  -3  -2  -2 8642.34  226.67
  -3   2  -2 8632.17  230.59
  -3  -2  -2 8273.98  219.26
   3   2   2 8337.99  222.17
  -3   2  -2 8804.00  232.91
   1   0   5    0.59    2.06
   1   0   5    0.08    2.32
   1   0   5    0.99    2.22
   1   0   5    0.38    1.68
  -2   0   5    0.53    1.91
   2   0  -5   -0.01    1.88
   0   3   0    0.72    1.82
   0  -3   0    0.48    2.00
   0   3   0    0.16    1.88
  -3   0  -4    1.89    2.00
   3   0   4    1.64    2.64
   3   0   4    2.64    2.21
  -3   0  -4    1.35    2.11
  -3   0  -4    3.15    2.61
  -5   0   212830.09  337.32
   5   0  -213275.50  356.75
  -5   0   212804.58  340.97
   5   0   1   -0.39    2.44
  -5   0  -1   -0.47    2.28
   5   0   1   -0.32    3.11
   0   1   5 1390.50   45.16
   0  -1   5 1344.08   43.72
   0   1   5 1468.68   47.53
   0  -1   5 1384.60   44.33
   0   1   5 1439.70   45.73
   0  -1   5 1379.50   44.84
   0  -1   5 1456.28   47.00
   0  -1  -5 1277.85   41.71
   4   0   3   -0.16    1.75
  -4   0  -3    0.34    2.44
   4   0   3   -0.15    2.86
   1  -1  -5  230.88   13.03
  -1   1   5  227.54   12.67
   1   1  -5  220.30   13.01
  -1   1   5  235.89   12.79
  -1  -1   5  224.71   12.27
   0  -2  -4  780.66   28.24
   0  -2   4  755.81   27.76
   0   2   4  782.55   28.61
   0  -2   4  756.03   27.61
   0   3   1  317.52   15.63
   0   3   1  304.87   15.66
   0  -3  -1  322.68   15.21
   0   3  -1  338.24   16.08
   0   3  -1  326.54   15.67
   0  -3   1  310.66   14.61
   1  -3   010272.51  270.90
  -1  -3   010324.47  269.63
   1   3   010833.76  284.18
   1   3   010664.33  281.34
  -1   3   010907.02  284.29
   1  -3   010464.84  278.25
   1   3   0 9844.87  265.57
   1  -2  -4  848.36   30.13
   1  -2  -4  834.23   30.19
  -1   2   4  868.71   30.98
   1   2  -4  797.60   31.25
  -1  -2   4  813.02   28.54
  -3  -2   3 4563.15  131.31
  -3  -2   3 4827.48  135.32
   3   2  -3 5004.85  144.63
  -3   2   3 4740.24  129.49
   3   2  -3 5068.15  138.31
   3  -2  -3 4763.40  130.16
   4   2   0 3280.13   95.54
  -4  -2   0 3436.02   96.94
   4  -2   0 3464.25   98.00
   4   2   0 3318.50   97.65
  -4   2   0 3467.64  102.07
  -4  -2   0 3557.56   99.00
   4  -2   0 3529.14  100.12
  -4   2   0 3240.17   94.25
  -4  -2   1  250.10   13.57
   4   2  -1  246.09   15.09
  -4   2   1  257.42   15.28
   4   2  -1  237.03   15.48
   4  -2  -1  244.76   12.96
  -4  -2   1  241.36   13.96
  -5  -1   1  399.23   19.64
   5  -1  -1  441.23   20.07
  -5  -1   1  423.71   20.00
  -5   1   1  433.42   21.01
   5  -1  -1  437.62   20.04
  -5   1   0 7705.20  214.75
  -5  -1   0 8278.55  220.32
  -5  -1   0 8187.28  216.65
   5  -1   0 8198.40  220.36
   5  -1   0 8640.88  230.08
   1  -3  -1 2832.60   83.93
  -1   3   1 2904.57   84.01
   1   3  -1 2917.75   84.71
   1  -3  -1 2933.39   83.13
   1   3  -1 2791.57   83.32
  -1   3   1 2952.73   84.32
  -4   0   4 2130.13   65.84
  -4   0   4 2059.60   61.58
  -1  -3  -1   29.01    4.21
   1   3   1   31.21    4.74
   1   3   1   30.69    5.15
   1   3   1   29.09    4.45
   1  -3   1   29.50    4.46
  -1   3  -1   10.06    3.28
   1  -3   1   28.44    4.14
   1  -2   4    3.98    2.34
   1  -2   4    3.74    2.35
   1  -2   4    2.86    2.18
   1   2   4    2.46    2.73
   1   2   4    3.46    2.34
  -1   2  -4    4.33    2.86
   1   1   5  846.13   30.68
   1  -1   5  820.64   29.88
   1  -1   5  859.73   30.81
   1   1   5  884.41   31.47
   1   1   5  843.12   31.26
   1   1   5  857.01   31.06
   1  -1   5  821.75   29.46
   1  -1   5  862.22   31.96
  -1  -1  -5  832.61   30.04
   2   1  -5 1269.39   42.27
  -2   1   5 1222.28   40.36
  -2  -1   5 1360.76   45.69
   2  -1  -5 1292.29   42.40
  -2   1   5 1293.38   41.41
  -2  -1   5 1267.01   40.43
  -4   2  -1 2448.03   75.31
   4  -2   1 2559.30   74.80
  -4   2  -1 2440.48   75.70
  -4  -2  -1 2537.48   73.53
  -4  -2  -1 2617.91   77.06
   4   2   1 2476.70   74.59
   4  -2   1 2692.22   80.87
  -2  -2   4   39.26    5.21
   2  -2  -4   40.14    5.26
   2   2  -4   37.45    5.08
  -2   2   4   39.15    5.20
   2   2  -4   40.45    5.23
  -2  -2   4   38.20    4.97
  -3   1  -4   -0.06    0.72
  -5  -1   2  696.12   28.56
  -5  -1   2  682.99   28.73
   5   1  -2  641.54   26.48
  -5   1   2  609.05   25.87
   5  -1  -2  676.72   25.87
   5   1  -2  637.78   27.72
   5  -1  -2  687.08   26.55
  -5   1  -1 3626.32  105.87
  -5   1  -1 3892.13  111.79
   5   1   1 3717.01  107.58
   5   1   1 3067.24   93.74
  -5  -1  -1 3766.21  104.62
   5  -1   1 3624.83  105.79
  -5  -1  -1 3475.78   99.12
   5  -1   1 3576.51  103.56
   4   2  -2  709.05   29.11
  -4  -2   2  690.19   26.46
  -4   2   2  686.56   27.14
   4  -2  -2  684.57   25.49
  -4  -2   2  687.28   27.67
   4   2  -2  713.11   30.27
   4  -1   3 4127.70  116.23
   4  -1   3 4218.74  120.56
  -4  -1  -3 4240.84  116.91
   4   1   3 4324.67  120.02
  -4   1  -3 3972.27  112.39
   4   1   3 4292.24  120.79
  -4   1  -3 4261.26  117.10
  -2   0  -5   -0.30    1.83
  -2   0  -5    0.46    1.84
   2   0   5   -0.02    1.94
  -2   0  -5   -0.32    2.29
   2   0   5    0.29    2.19
   3   0  -5   -0.03    2.19
  -3   0   5    0.30    2.01
  -3   0   5   -0.56    1.81
   0  -3  -2  348.02   16.01
   0   3   2  340.30   16.32
   0   3   2  341.49   16.84
   0  -3   2  337.96   15.25
  -2   3   0  680.76   27.14
   2   3   0  684.55   26.68
  -2  -3   0  674.09   25.57
  -2   3   0  701.72   26.70
   2  -3   0  681.82   25.68
   2   3   0  658.51   26.30
   2  -3   0  667.86   25.41
  -5   0   3   -0.24    3.28
  -5   0   3    0.34    2.94
  -1   3   2 8159.26  218.13
   1  -3  -2 8592.19  229.68
   1   3  -2 8446.17  228.01
   1  -3  -2 8224.80  221.98
   1   3  -2 8611.35  226.82
  -1   3   2 8263.08  219.09
   1   3  -2 8238.56  217.59
   5   0   2  121.33   10.21
   5   0   2  123.75   10.75
  -2   3   1 4125.11  116.48
  -2  -3   1 4078.75  113.21
  -2   3   1 4097.80  114.32
   2  -3  -1 3935.51  109.53
   2   3  -1 3979.66  111.40
   2  -3  -1 4083.10  112.83
   2   3  -1 4196.66  122.44
  -3  -2  -3  418.64   19.75
   3  -2   3  371.81   18.02
   3  -2   3  371.13   19.45
  -3   2  -3  362.65   16.66
  -3  -2  -3  374.68   17.28
  -3   2  -3  371.80   19.70
   3   2   3  365.53   17.59
  -4  -1   4 2030.86   62.00
  -4   1   4 2143.95   63.43
   4   1  -4 1996.98   60.75
  -4  -1   4 2034.45   64.67
   4   1  -4 1929.12   59.33
  -4   1   4 2014.23   60.88
   4  -1  -4 2042.67   61.40
  -1  -3  -2 1537.52   48.87
   1   3   2 1415.90   46.82
   1   3   2 1523.75   49.71
   1   3   2 1349.66   46.02
  -1   3  -2 1511.37   49.95
   1  -3   2 1429.98   45.95
   2   1   5 1318.49   44.06
  -2  -1  -5 1287.06   42.79
   2  -1   5 1216.97   43.09
   2  -1   5 1145.07   40.28
  -2  -1  -5 1230.91   40.80
   2   1   5 1271.54   42.33
  -2   1  -5 1211.82   41.24
  -2   1  -5 1305.12   43.78
   3  -1  -5 1669.94   53.08
  -3   1   5 1600.77   50.07
   3   1  -5 1609.99   52.34
  -3  -1   5 1684.14   56.37
  -3  -1   5 1580.66   49.83
   4   2   2 2059.38   65.16
  -4   2  -2 1977.65   64.65
  -4  -2  -2 1977.00   61.48
   4   2   2 1871.71   61.07
   4  -2   2 1945.88   63.78
  -4   2  -2 1922.39   61.10
  -4  -2  -2 1991.45   60.60
   4  -2   2 1989.20   61.89
  -2   3   2  653.69   25.69
   2   3  -2  637.71   26.39
   2  -3  -2  629.43   24.73
  -2   3   2  651.15   25.19
   2   3  -2  677.79   28.16
  -2  -3   2  642.01   24.40
  -5  -1   3 1431.54   49.62
   5   1  -3 1463.55   48.25
   5   1  -3 1410.59   49.81
  -5  -1   3 1444.07   50.70
   5  -1  -3 1381.32   45.12
  -5   1   3 1461.48   49.18
  -5   1   3 1373.74   46.25
   5  -1   2 5929.43  168.51
   5   1   2 5780.50  167.99
  -5   1  -2 5736.29  160.41
  -5  -1  -2 5930.47  163.38
   5  -1   2 5302.78  152.25
  -5  -1  -2 5888.86  162.73
  -5   1  -2 5671.29  160.03
   5   1   2 5837.88  165.10
   3   2  -4 9498.02  262.86
  -3   2   4 8550.40  235.03
  -3  -2   4 9126.99  247.62
   3  -2  -4 9349.19  258.09
  -3  -2   4 9432.86  259.07
   3   2  -4 9349.43  261.49
   4   2  -3 9295.93  253.35
  -4  -2   3 9719.49  266.67
  -4   2   3 9445.22  254.77
  -4  -2   3 9342.80  254.06
   4   2  -3 9045.21  249.19
  -4   2   3 9171.51  248.53
   4  -2  -3 9331.07  253.85
  -1   0   6 8780.61  245.37
  -1   0   6 9417.26  254.53
  -1   0   6 9630.91  265.06
  -4   0  -4 3321.35   95.98
   4   0   4 3375.59   98.32
  -4   0  -4 3307.09   96.11
   4   0   4 3543.69  104.85
   0   0   6 1499.80   48.80
   0   0   6 1577.32   51.70
   0   0   6 1621.86   51.63
   0   0   6 1483.49   47.81
   2   3   2 1074.88   37.26
  -2  -3  -2 1062.75   36.69
   2   3   2  939.53   34.71
  -2   3  -2 1064.38   38.06
  -2  -3  -2 1077.83   36.22
   2  -3   2 1045.87   35.33
   0   3  -3  174.26   12.27
   0   3   3  172.80   10.94
   0  -3  -3  186.71   10.95
   0   3   3  186.63   11.96
   3   3   0   39.16    5.36
   3  -3   0   41.14    4.95
   3   3   0   43.84    5.92
  -3  -3   0   41.27    5.04
  -3   3   0   41.50    6.06
  -3   3   0   41.30    5.26
  -3   3   0   40.02    5.43
  -3  -3   0   44.33    5.84
  -1   3   3 8257.53  230.66
   1   3  -3 8574.18  236.51
  -1   3   3 8157.34  223.52
   1  -3  -3 8248.31  224.56
  -3  -3   1   56.13    5.65
   3  -3  -1   55.70    5.91
  -3  -3   1   62.16    6.47
   3   3  -1   65.92    8.00
   3   3  -1   62.36    7.14
  -3   3   1   57.92    6.44
  -3   3   1   55.23    5.95
  -3   3   1   64.93    6.81
  -6   0   1    0.86    3.30
   6   0  -1    1.15    3.01
  -6   0   1   -0.12    3.50
   6   0  -1   -0.02    2.79
   0   2   5 1880.52   58.73
   0  -2   5 1878.42   59.59
   0  -2   5 1652.88   64.34
  -1  -2   5  473.39   20.46
  -1   2   5  504.19   21.30
  -1  -2   5  485.17   20.00
   6   0   0 4696.53  136.64
  -6   0   0 4900.05  140.30
   6   0   0 4732.47  139.60
  -6   0   0 4412.60  126.68
   3   0   5   -0.32    1.84
  -3   0  -5    0.24    2.09
  -3   0  -5    0.13    1.82
   3   0   5   -0.27    2.08
  -3   0  -5   -0.14    2.23
  -4   0   5   -0.27    2.12
  -4   0   5    1.47    2.45
   4   0  -5    0.04    2.20
   2   0  -6  474.99   20.87
  -2   0   6  488.12   20.19
  -5   0   4 3265.15   96.76
   5   0  -4 3278.43   96.58
  -5   0   4 3370.34  100.98
  -1   3  -3   -0.14    1.06
  -5   0  -3    0.45    2.20
   5   0   3   -1.00    2.29
   5   0   3    0.30    2.97
   5  -2  -1 2695.21   79.64
  -5  -2   1 2722.74   80.80
  -5  -2   1 2798.64   83.19
   5   2  -1 2821.82   88.96
  -5   2   1 2722.64   84.45
   5   2  -1 2800.65   87.59
  -5   2   1 2384.77   75.65
   5  -2   0 2011.86   62.71
  -5  -2   0 2112.73   64.16
   5  -2   0 2078.54   64.67
   5   2   0 1972.52   65.52
  -5  -2   0 1968.56   60.66
   5   2   0 1944.63   63.49
  -5   2   0 1966.77   64.94
  -5   2   0 1919.80   62.15
  -3   3  -1   15.30    3.45
  -3   3  -1   17.71    4.52
   3   3   1   13.68    3.65
  -3  -3  -1   12.46    3.13
   3   3   1   13.81    3.40
  -3  -3  -1   13.03    3.25
   3  -3   1   13.01    2.99
  -3   3  -1   14.17    3.59
   1   0   618748.42  498.33
   1   0   619168.99  528.57
   1   0   620305.36  561.32
   1   0   618732.37  496.89
  -6   0   2 9413.60  260.52
  -6   0   2 9733.41  269.71
   6   0  -2 9578.19  260.60
  -1  -1   6  409.58   18.81
  -1   1   6  460.87   19.63
  -1  -1   6  459.56   19.47
  -1   1   6  487.95   21.44
  -1   1   6  429.34   19.06
  -4   1  -4 5166.26  144.12
  -4  -1  -4 5099.34  141.93
   4   1   4 5621.20  156.84
  -4   1  -4 5493.11  154.85
  -4   1  -4 5113.43  144.20
   4  -1   4 4657.37  132.04
  -4  -1  -4 5169.52  146.45
   4   1   4 5178.99  185.02
   4  -1   4 5408.98  156.01
  -4  -1  -4 5833.96  160.78
   0  -1   6 1979.95   61.43
   0   1   6 2021.82   62.98
   0  -1   6 1958.63   60.24
   0   1   6 2046.03   63.58
   0   1   6 1804.92   57.36
   0  -1   6 1944.75   60.62
   0  -1   6 2076.29   65.01
   0   1   6 1986.57   61.27
   1  -2   5  848.40   32.01
  -1  -2  -5  765.29   28.06
   1   2   5  803.08   30.09
   1  -2   5  807.69   29.20
   1  -2   5  825.90   32.64
   1  -2   5  800.47   28.97
   1   2   5  854.27   30.85
   2   3  -3 1241.21   44.25
  -2   3   3 1153.18   40.98
  -2  -3   3 1225.01   40.65
   2   3  -3 1205.29   40.57
  -2   3   3 1203.69   40.11
   2  -3  -3 1166.01   39.43
  -2  -2   5 1872.86   59.33
   2  -2  -5 1916.69   59.80
   2   2  -5 1965.40   61.83
  -2  -2   5 1970.42   59.98
  -2   2   5 1924.11   59.68
  -3  -3   2  317.86   15.78
   3  -3  -2  306.90   15.19
  -3   3   2  316.35   15.74
  -3  -3   2  320.96   15.27
  -3   3   2  317.09   15.53
   3   3  -2  323.04   18.20
   3   3  -2  317.81   17.09
   6   0   1   -0.06    3.41
   6   0   1    2.78    3.84
  -6   0  -1    0.11    2.81
  -3  -2  -4 4062.23  115.36
   3  -2   4 3912.10  115.21
  -3   2  -4 3474.16  103.03
   3  -2   4 4140.37  120.15
  -3  -2  -4 4135.47  117.57
   3   2   4 4060.10  116.66
  -3   2  -4 4216.06  119.93
  -5  -2   2 3949.50  115.12
  -5  -2   2 3639.30  106.81
  -5   2   2 3903.82  114.67
   5  -2  -2 3689.11  105.03
   5   2  -2 3849.61  113.64
   5   2  -2 3798.53  114.08
  -5   2  -1  392.27   19.87
   5  -2   1  389.13   19.20
  -5   2  -1  383.74   19.90
   5  -2   1  396.14   18.33
   5   2   1  386.99   19.56
  -5  -2  -1  417.92   18.19
  -5  -2  -1  405.06   18.35
  -6   1   1  687.98   28.99
   6  -1  -1  691.82   27.53
  -6  -1   1  670.20   27.33
  -6  -1   1  663.38   27.19
   6  -1  -1  670.08   27.12
  -4  -2  -3   55.99    5.96
   4  -2   3   60.65    7.56
  -4  -2  -3   59.09    6.33
   4   2   3   61.43    6.69
   4  -2   3   58.65    6.68
  -4   2  -3   60.73    7.34
  -4   2  -3   58.75    6.10
  -6   1   0  980.41   37.50
   6  -1   0 1008.37   37.31
  -6  -1   0 1018.14   36.28
  -6  -1   0 1035.19   37.08
   6  -1   0 1053.83   38.35
  -3  -1  -5  226.79   13.40
  -3  -1  -5  214.62   12.46
  -3   1  -5  206.87   12.32
   3   1   5  214.80   12.06
  -3  -1  -5  213.05   12.03
   3  -1   5  228.94   14.50
  -3   1  -5  213.21   12.67
   3  -1   5  227.27   12.57
   3   1   5  227.58   13.28
   4   1  -5 2273.51   69.17
  -4   1   5 2281.01   67.97
  -4  -1   5 2322.55   73.51
  -4   1   5 2289.51   69.24
  -4  -1   5 2244.21   69.80
   4  -1  -5 2271.99   69.24
  -2  -1   6 4437.92  130.01
  -2   1   6 5524.62  154.91
   2  -1  -6 4861.93  141.80
  -2  -1   6 5467.64  151.23
  -2   1   6 5473.75  152.01
   2   1  -6 5405.04  154.13
  -5   1   4   45.40    6.06
   5   1  -4   40.06    5.25
  -5  -1   4   44.67    6.33
   5   1  -4   40.22    5.69
  -5  -1   4   38.69    5.82
   5  -1  -4   41.66    5.26
  -5   1   4   43.51    5.84
  -5   1  -3    2.32    2.12
   5   1   3    2.31    3.15
   5  -1   3    3.67    3.40
  -5   1  -3    1.23    2.44
   5   1   3    0.41    3.05
  -5  -1  -3    0.63    2.23
   5  -1   3    2.17    2.98
   1  -1   6 2014.00   64.21
   1  -1   6 2037.62   63.83
   1   1   6 2046.00   64.08
   1   1   6 2071.70   64.21
   1  -1   6 2095.89   64.06
   1   1   6 2092.05   64.19
   1  -1   6 1923.42   59.39
   1   1   6 2053.89   63.28
  -1  -1  -6 1931.09   59.89
   4  -2  -4 6428.73  179.52
  -4  -2   4 6291.63  175.53
   4   2  -4 6460.40  180.18
  -4   2   4 5835.14  161.98
  -4  -2   4 6468.75  181.59
  -4   2   4 6747.65  185.85
   4   2  -4 6660.73  187.58
  -3   0   6   43.44    5.57
   3   0  -6   49.33    6.27
  -3   0   6   41.40    5.07
  -2   3  -3 2116.64   68.69
  -2  -3  -3 2017.74   61.78
   2   3   3 1984.32   64.90
   2  -3   3 2078.63   63.97
  -2  -3  -3 2030.82   62.25
   3   3   2  511.06   22.06
  -3   3  -2  529.29   22.65
   3   3   2  443.16   20.35
  -3   3  -2  533.15   24.35
  -3  -3  -2  493.95   21.14
  -3   3  -2  515.80   22.75
  -3  -3  -2  557.11   22.14
   3  -3   2  535.24   22.25
   6   1  -2    1.06    2.68
  -6   1   2    2.44    3.20
   6  -1  -2    2.96    2.71
   6  -1  -2    1.39    2.50
  -6  -1   2    1.46    2.89
   6   1  -2    1.87    2.98
  -6  -1   2    3.48    2.80
   6   1   1  780.91   32.97
   6  -1   1  753.30   31.04
  -6  -1  -1  789.42   30.86
   6   1   1  671.62   30.21
  -6  -1  -1  826.15   30.87
  -6   1  -1  727.21   30.66
   6  -1   1  743.58   31.20
  -6   1  -1  725.61   29.50
   6   0  -3   -0.32    2.14
  -6   0   3    1.08    3.20
  -6   0   3    0.28    2.67
   2   0   6 3782.51  111.80
   2   0   6 3980.90  118.00
  -2   0  -6 3740.91  110.66
  -2   0  -6 3767.14  111.62
   0  -3  -4 1984.16   62.00
   0   3   4 1807.58   58.01
   0   3   4 1702.60   59.49
   0   3   4 1978.51   62.53
  -2   2  -5    0.60    1.46
   3  -2  -510007.73  281.13
  -3   2   510304.37  295.70
  -3  -2   510145.14  291.56
   3   2  -510266.35  294.66
  -3  -2   5 9982.39  283.12
  -1   3   4 1449.05   51.31
  -1   3   4 1339.83   44.97
  -1  -3   4 1365.85   45.74
   1  -3  -4 1373.81   45.51
  -1  -3   4 1389.63   49.02
   6   0   2 2220.37   74.06
   6   0   2 2220.69   72.99
  -6   0  -2 1938.35   62.84
  -3   3   3  438.87   19.22
  -3  -3   3  435.65   19.68
   3   3  -3  462.81   23.05
   3   3  -3  412.85   19.09
  -3  -3   3  424.26   19.02
  -3   3   3  436.34   19.70
   3  -3  -3  408.79   19.16
   4  -3   0  137.79    9.29
   4   3   0  138.88   10.60
  -4  -3   0  137.65    9.68
   4   3   0  136.43   11.01
  -4   3   0  149.61   11.98
  -4   3   0  143.53   10.50
  -4  -3   0  134.55    8.95
  -4   3   0  140.45    9.76
  -5  -2   3    0.74    2.23
  -5   2   3    4.15    3.10
   5   2  -3    0.98    2.68
  -5   2   3    0.87    2.71
   5  -2  -3    0.93    2.19
   5   2  -3    0.88    2.26
  -5  -2   3    0.48    3.13
  -4  -3   1  285.68   14.78
   4   3  -1  289.49   17.63
  -4   3   1  274.15   14.76
  -4   3   1  272.83   14.59
   4  -3  -1  274.28   13.94
  -4   3   1  282.65   16.02
   4   3  -1  284.56   16.06
  -4  -3   1  283.23   14.08
   5   2   2 1360.34   47.74
  -5  -2  -2 1364.93   45.04
  -5   2  -2 1420.73   50.85
   5   2   2 1427.70   49.49
  -5   2  -2 1440.92   49.09
   5  -2   2 1406.56   47.84
  -5  -2  -2 1464.58   48.82
   5  -2   2 1421.99   50.42
   3  -1  -6 1012.93   36.71
  -3  -1   6 1146.32   41.98
  -3   1   6 1085.62   38.66
  -3  -1   6 1031.05   35.73
   3   1  -6 1035.35   37.21
  -3   1   6 1037.12   35.77
   1   3   4  446.30   19.99
   1  -3   4  454.86   20.25
   1   3   4  455.00   20.55
   1  -3   4  471.22   23.05
  -1  -3  -4  445.54   19.22
  -1   3  -4  458.61   22.59
   1  -3   4  423.80   18.33
   1   3   4  487.37   22.13
   6   1  -3  326.93   18.03
  -6  -1   3  371.52   19.49
  -6   1   3  375.31   19.25
  -6  -1   3  365.14   18.97
   6   1  -3  362.41   17.89
   6  -1  -3  366.86   17.22
  -6   1   3  378.92   19.30
   2  -1   6    1.29    1.75
   2   1   6    1.67    2.66
   2  -1   6    2.54    2.28
   2   1   6    1.61    2.73
  -2   1  -6    1.58    2.41
  -2  -1  -6    1.77    1.99
   4   0   5    0.41    2.86
  -4   0  -5    0.16    1.78
  -4   0  -5   -0.36    1.77
   4   0   5   -0.03    2.12
  -4   0  -5   -0.38    2.31
  -4  -3  -1   39.05    4.86
  -4   3  -1   39.38    5.76
  -4   3  -1   41.53    5.21
  -4   3  -1   43.18    6.60
   4   3   1   38.54    5.48
   4   3   1   40.44    5.84
  -4  -3  -1   41.84    5.31
   4  -3   1   41.68    5.12
   5   0  -5    0.21    2.00
  -5   0   5   -0.40    2.16
  -5   0   5    0.55    2.59
   2  -3  -4    0.61    2.31
   2   3  -4    1.94    2.07
  -2   3   4    1.26    2.07
   2   3  -4    1.18    2.32
  -2  -3   4    2.73    2.52
  -5   0  -4 3777.41  110.85
  -5   0  -4 3683.09  109.09
   5   0   4 3639.30  108.63
   5   0   4 3834.55  116.65
  -4   3   2 1758.35   56.99
  -4   3   2 1885.97   60.77
   4   3  -2 1832.51   62.14
   4   3  -2 1873.93   62.81
  -4  -3   2 1904.40   60.99
  -4   3   2 1807.21   58.89
  -4  -3   2 1865.99   59.22
   4  -3  -2 1804.52   57.53
  -6   1  -2 2700.02   85.81
   6  -1   2 2813.04   89.17
   6   1   2 2805.49   89.84
  -6  -1  -2 2851.09   85.57
   6  -1   2 2822.90   88.91
  -6  -1  -2 2735.07   83.71
  -6   1  -2 2664.15   81.71
   6   1   2 2740.89   87.62
  -3   3  -3   48.83    6.59
   3  -3   3   56.85    6.62
  -3   3  -3   54.62    5.72
  -3  -3  -3   58.53    6.12
  -3  -3  -3   60.82    6.02
   3   3   3   52.32    5.91
  -4   0   6    8.01    2.72
   4   0  -6    9.07    3.25
  -4   0   6    7.79    3.36
  -1   2   6    0.24    2.07
  -1  -2   6    0.69    1.94
  -1   2   6    0.97    2.25
  -1  -2   6    0.32    1.79
  -1   2   6    1.59    2.72
   4   2   4 2619.71   80.91
   4  -2   4 2521.97   80.70
  -4  -2  -4 2377.66   72.49
   4  -2   4 2650.73   83.60
  -4   2  -4 2569.03   78.27
  -4   2  -4 2711.75   84.79
  -4  -2  -4 2687.91   81.94
   0   2   6    1.58    2.52
   0  -2  -6    3.50    2.29
   0  -2   6    3.59    2.22
   0  -2   6    2.35    1.86
   0   2   6    5.70    3.08
   0   2   6    1.40    2.37
   6   0  -4 1653.90   54.48
  -6   0   4 1693.98   56.65
  -6   0   4 1683.27   57.69
   0   4   0   39.70    5.08
   0  -4   0   34.09    4.44
   0   4   0   37.48    4.93
  -1   0   7   -0.21    2.27
  -1   0   7   -0.18    1.80
  -1   0   7   -0.10    2.49
   4   1   5  457.62   21.44
   4  -1   5  450.63   22.37
  -4  -1  -5  390.17   18.08
  -4   1  -5  431.30   19.68
  -4  -1  -5  429.21   18.89
   4  -1   5  372.53   17.87
  -4   1  -5  435.09   19.44
  -4   1  -5  426.52   19.19
  -4  -1  -5  401.98   18.41
   4   1   5  446.80   19.51
  -5  -1   5  142.88   10.29
   5   1  -5  136.76    9.95
   5   1  -5  143.96   10.02
  -5  -1   5  146.81   11.48
   5  -1  -5  110.03    8.63
  -5   1   5  152.12   10.62
  -5   1   5  142.36    9.79
   0   0   7    0.53    2.29
   0   0   7    3.78    2.56
   0   0   7   -0.44    2.01
   0   0   7    0.18    2.20
  -3   0  -6  472.60   21.69
  -3   0  -6  412.92   18.70
  -3   0  -6  429.20   19.57
   3   0   6  436.03   18.93
   3   0   6  463.81   21.50
   5   1   4    7.94    2.95
   5   1   4    8.78    3.52
  -5   1  -4    8.28    2.89
   5  -1   4    7.63    3.81
  -5  -1  -4    9.25    3.07
   5  -1   4    7.44    3.17
  -5  -1  -4    7.81    2.94
  -5   1  -4    5.90    2.79
  -2   3  -4    0.10    0.70
  -6  -2   1    5.43    3.05
  -6   2   1   12.46    4.39
   6   2  -1    5.23    3.52
  -6  -2   1    6.36    3.05
   6  -2  -1   28.96    8.65
   6  -2  -1   67.87   14.57
   6   2  -1    5.01    3.66
  -6   2   1   32.35    7.51
  -6   2   0  274.17   16.33
   6   2   0  268.94   16.32
  -6  -2   0  279.91   14.61
   6  -2   0  274.73   14.91
   6   2   0  277.82   17.11
  -6   2   0  295.15   17.53
  -6  -2   0  295.33   14.90
   6  -2   0  273.89   14.70
  -4   3  -2 1189.70   41.50
   4   3   2  968.51   36.56
   4   3   2 1190.54   42.25
  -4   3  -2 1155.94   43.02
  -4  -3  -2 1157.94   39.48
  -4   3  -2 1216.71   43.04
   4  -3   2 1222.51   42.36
  -4  -3  -2 1370.71   47.44
   0   4   1 7021.48  199.88
   0   4  -1 6737.17  190.89
   0  -4   1 6534.92  185.71
   0   4   1 6751.55  194.02
   0   4  -1 5228.00  167.85
   0  -4  -1 6636.09  187.61
   0   4  -1 6242.06  183.20
  -3   2  -5  511.47   22.07
   3  -2   5  465.27   20.84
   3   2   5  489.75   21.45
  -3  -2  -5  471.70   20.20
  -3  -2  -5  505.84   21.50
   3  -2   5  504.03   23.26
  -3   2  -5  386.78   18.53
   3   2   5  443.55   19.83
  -1   4   0  134.46    9.42
   1   4   0  150.47   10.14
  -1  -4   0  138.39    9.07
   1  -4   0  139.93    9.15
  -1   4   0  124.55    9.49
   1   4   0  147.20   10.14
   1   4   0  145.51   10.42
   4  -2  -5  139.38    9.78
  -4  -2   5  143.11   10.62
  -4   2   5  156.51   10.52
  -4  -2   5  140.09   10.50
   4   2  -5  137.60    9.99
   4   2  -5  137.28    9.75
  -4   2   5  145.03   10.01
   2  -2  -6  116.92    8.92
  -2   2   6   99.67    7.86
   2   2  -6  114.99    9.10
  -2  -2   6  108.67    8.00
  -2  -2   6  102.51    8.87
  -2   2   6  112.37    8.57
  -5  -2   4 1135.42   40.41
   5  -2  -4 1161.80   40.21
  -5   2   4 1097.15   38.93
  -5   2   4 1124.88   39.36
   5   2  -4 1173.90   40.83
  -5  -2   4 1151.80   42.57
   5   2  -4 1140.07   42.38
   6   0   3    0.26    2.89
   6   0   3    0.95    3.05
  -6   0  -3   -0.21    2.37
  -6   0  -3   -0.02    2.31
   5   2   3  270.31   15.27
  -5  -2  -3  267.68   14.31
  -5   2  -3  288.17   14.86
   5  -2   3  269.63   16.29
  -5  -2  -3  265.05   13.73
  -5   2  -3  258.12   16.03
   5  -2   3  277.87   15.44
  -3   3   4   20.00    3.76
  -3  -3   4   20.04    4.25
   3   3  -4   19.84    3.67
   3  -3  -4   19.18    3.81
  -3   3   4   19.10    3.85
   3   3  -4   20.14    4.66
  -3  -3   4   19.84    3.77
  -2   0   7   -0.15    1.85
   2   0  -7   -0.48    2.01
  -2   0   7   -0.49    1.97
  -7   0   1   -0.45    2.96
   7   0  -1    0.46    2.85
   7   0  -1    0.30    3.50
  -7   0   1   -0.71    2.81
  -1  -4   1  124.34    8.45
  -1   4   1  125.95    9.50
   1   4  -1  115.73    9.56
  -1   4   1  132.07    9.28
   1   4  -1  132.48    9.90
   1  -4  -1  122.85    8.50
   1  -2   6  248.20   13.15
   1  -2   6  246.83   13.13
   1   2   6  260.15   14.28
   1   2   6  266.64   14.86
   1  -2   6  248.07   14.83
  -1  -2  -6  232.00   12.76
   1  -2   6  249.49   13.58
   1   2   6  248.97   13.34
  -4   3   3  962.85   34.80
   4   3  -3  975.05   35.99
  -4  -3   3  973.27   35.63
  -4  -3   3  952.79   34.44
  -4   3   3  902.91   33.19
   4   3  -3  987.90   39.13
   4  -3  -3  907.11   33.05
   4  -1  -6 1443.30   48.39
   4   1  -6 1504.10   50.37
  -4   1   6 1570.03   51.55
  -4  -1   6 1644.08   56.40
  -4  -1   6 1529.72   49.81
   7   0   0 8017.06  229.97
   7   0   0 8211.63  236.91
  -1   4  -1  963.58   37.36
  -1   4  -1  923.40   34.05
   1  -4   1  852.50   30.46
   1   4   1  944.54   34.50
   1   4   1  899.61   33.04
   1   4   1  916.13   34.69
  -1  -4  -1  912.86   32.50
   6   2  -2  144.37   11.70
  -6  -2   2  147.28   10.48
   6   2  -2  154.36   11.64
   6  -2  -2  145.30    9.80
  -6   2   2  128.16   10.65
  -6  -2   2  135.32   10.22
   6  -1  -4 2989.07   89.80
   6   1  -4 2898.40   88.95
  -6  -1   4 2900.53   91.39
  -6   1   4 3014.93   92.99
   6   1  -4 2882.69   90.90
  -6  -1   4 3089.26   96.32
   1   0   7   -0.58    1.87
   1   0   7    0.17    2.13
   1   0   7   -0.01    2.31
   1   0   7    0.25    2.27
  -1  -1   7 1581.96   53.44
  -1  -1   7 1471.92   49.28
  -1  -1   7 1602.45   54.71
  -1   1   7 1485.81   50.25
  -1  -1   7 1455.95   49.31
  -1   1   7 1554.15   53.27
   6  -2   1  186.39   11.83
  -6  -2  -1  182.89   11.42
  -6  -2  -1  196.65   11.58
  -6   2  -1  179.48   12.42
   6   2   1  188.26   13.58
   6  -2   1  189.18   12.57
  -6   2  -1  195.38   13.54
  -7   0   2 6469.56  191.11
   7   0  -2 6518.94  268.92
   0   1   7  658.38   26.59
   0   1   7  681.72   27.68
   0  -1   7  674.07   27.39
   0  -1   7  663.66   26.40
   0  -1   7  642.15   25.56
   0   1   7  756.56   30.84
   0  -1   7  635.96   25.98
  -3   1  -6   -0.30    1.56
   3  -1   6    1.04    2.17
   3   1   6   -0.49    2.01
  -3   1  -6   -0.26    2.01
  -3  -1  -6   -0.22    1.96
   3  -1   6    0.08    2.24
   3   1   6   -0.01    2.31
   0   3   5  337.83   16.63
   0  -3   5  338.38   15.97
   0   3   5  364.25   18.28
   0   3   5  353.56   17.05
   0  -3   5  353.43   16.59
  -1  -3   5   25.80    4.46
  -1   3   5   24.96    4.60
  -1  -3   5   25.92    4.07
  -1   3   5   24.34    4.22
  -1   3   5   24.68    4.33
   0  -4   2  752.92   28.16
   0   4   2  779.12   30.52
   0   4  -2  743.99   31.93
   0   4   2  801.87   30.67
   0  -4  -2  704.47   26.95
  -2  -4   0 2203.35   69.81
  -2   4   0 2320.55   75.19
   2   4   0 2315.14   76.53
   2   4   0 2340.51   76.99
   2  -4   0 2340.25   74.35
   2  -4   0 2284.11   72.10
  -2  -4   0 2239.84   71.21
  -6   1  -3  575.05   23.71
   6  -1   3  582.90   26.96
   6  -1   3  579.11   26.32
   6   1   3  607.93   26.49
   6   1   3  619.71   27.68
  -6   1  -3  590.66   25.66
   1  -4  -2 2793.33   86.15
  -1   4   2 2750.31   88.81
  -1  -4   2 2674.18   84.14
  -1   4   2 2783.74   90.95
  -1   4   2 2697.60   84.73
   1   4  -2 2896.25   91.94
  -5   3   1 1897.98   61.91
  -5   3   1 1838.28   61.58
   5   3  -1 1874.33   64.02
   5  -3  -1 1862.14   60.04
  -5   3   1 1949.67   66.70
  -5  -3   1 1898.58   61.05
  -5  -3   1 1869.14   60.83
   5   3  -1 1893.54   65.93
   5   3   0 4649.47  144.57
  -5   3   0 4633.06  138.18
   5  -3   0 4522.30  134.68
  -5   3   0 4387.93  135.39
   5   3   0 4269.75  130.14
  -5   3   0 4502.93  136.99
  -5  -3   0 4596.26  136.81
  -5  -3   0 4546.29  135.03
   7   0   1   -0.47    2.97
   7   0   1   -1.08    3.27
  -2   4   1  678.28   27.05
  -2  -4   1  635.91   25.83
   2   4  -1  655.20   29.06
  -2   4   1  650.81   26.36
   2  -4  -1  652.27   26.31
   2   4  -1  675.10   27.85
   2  -4  -1  615.67   24.48
  -2   1   7  399.62   18.50
  -2  -1   7  442.54   20.59
  -2  -1   7  410.00   18.23
   2   1  -7  408.04   19.47
   7  -1  -1  112.98    9.49
   7  -1  -1  103.87    8.80
   3  -2  -6   14.81    3.84
  -3  -2   6   19.12    4.23
  -3  -2   6   16.23    3.39
   3   2  -6   15.64    3.53
  -3   2   6   16.22    3.85
   7  -1   0   84.68    8.28
   7  -1   0   67.99    7.59
   1  -4   2  985.37   35.08
   1   4   2 1010.57   37.33
  -1  -4  -2 1070.29   37.39
   1   4   2 1081.70   39.09
   1   4   2 1075.49   38.40
   3   0  -7    0.83    2.18
  -3   0   7   -0.58    2.06
  -3   0   7    0.18    2.03
  -2   4  -1   -0.05    1.01
   2  -4   1   12.48    3.08
  -2  -4  -1   13.43    3.20
   2   4   1   13.25    3.59
   2  -4   1   14.14    3.30
  -2   4  -1   14.45    3.63
   2   4   1   14.28    3.34
   1   3   5   74.12    7.83
   1   3   5   62.58    6.58
   1  -3   5   56.44    5.66
   1  -3   5   62.22    6.60
   1  -3   5   61.50    6.24
   1   3   5   58.11    6.40
   2   3  -5  891.81   34.45
   2  -3  -5  913.06   34.06
  -2   3   5  899.11   33.71
  -2   3   5  876.99   32.38
   1   1   7  281.73   14.90
   1   1   7  288.82   14.97
   1  -1   7  266.34   14.14
   1  -1   7  275.63   14.37
   1   1   7  274.52   14.90
   1  -1   7  297.93   16.01
  -1  -1  -7  275.29   14.44
   1  -1   7  275.13   14.30
  -6  -2   3  286.99   15.45
   6   2  -3  286.76   17.28
   6  -2  -3  288.98   14.73
   6   2  -3  285.76   15.87
  -6  -2   3  302.04   17.15
  -2   2  -6    0.09    1.20
   7   1  -2  217.79   14.43
   7  -1  -2  221.25   13.02
  -7  -1   2  208.84   13.33
   7  -1  -2  224.28   13.25
   7   1  -2  211.53   13.51
  -3   3  -4    2.79    2.62
   3   3   4    1.95    2.44
   3  -3   4    3.32    2.97
  -3  -3  -4    1.89    2.64
  -3   3  -4    1.46    1.88
   3   3   4    2.10    2.93
  -5  -3   2   18.44    3.70
  -5   3   2   18.62    4.60
   5   3  -2   20.13    4.78
  -5  -3   2   21.73    3.96
  -5   3   2   16.13    3.89
   5   3  -2   18.54    4.70
   5  -3  -2   19.91    3.82
  -5   3  -1  524.39   24.56
   5   3   1  487.59   23.25
  -5   3  -1  496.46   23.96
   5  -3   1  515.91   21.95
  -5  -3  -1  522.58   22.31
  -5  -3  -1  493.84   20.71
   5   3   1  499.61   22.87
  -5   3  -1  511.70   22.09
   4   3   3    3.26    2.66
  -4   3  -3    3.96    2.22
  -4   3  -3    4.90    3.28
  -4  -3  -3    4.63    2.77
   4  -3   3    3.13    2.70
   7   0  -3   -0.34    2.25
  -5   0   6  116.81    9.82
   5   0  -6  110.50    8.75
  -2  -4   2    0.95    1.77
   2   4  -2    0.78    2.05
   2  -4  -2    0.70    1.90
  -2   4   2    0.36    2.26
   2   4  -2    0.65    1.86
   2  -4  -2   -0.16    2.14
  -2   4   2    0.96    1.94
  -6   2  -2   13.65    3.68
  -6   2  -2   13.91    4.15
   6  -2   2   12.35    3.51
   6   2   2   13.01    3.99
   6  -2   2   13.64    4.60
   6   2   2   12.10    4.23
   2   0   7   -0.02    1.73
   2   0   7   -0.34    1.92
   2   0   7    0.48    1.99
  -5   0  -5   -0.08    1.83
   5   0   5   -0.07    2.57
  -5   0  -5   -0.38    2.26
   5   0   5   -0.26    2.16
   6   0  -5   -0.18    2.32
  -6   0   5    0.16    2.61
   7   1   1   28.44    6.08
   7  -1   1   30.97    5.78
   7  -1   1   34.93    5.80
   7   1   1   37.00    6.12
  -4  -3   4  223.01   14.03
   4  -3  -4  217.77   12.51
   4   3  -4  230.49   12.96
  -4  -3   4  221.81   12.90
   4   3  -4  231.61   15.25
  -4   3   4  223.87   12.59
  -4   3   4  226.31   13.06
   3   1  -7  374.72   18.28
  -3   1   7  389.68   18.18
  -3  -1   7  361.75   16.56
  -3  -1   7  411.71   20.57
   2   4   2   59.70    6.34
   2   4   2   57.88    6.62
  -2   4  -2   55.61    5.93
  -2   4  -2   56.81    6.24
   2  -4   2   56.86    5.81
   2   4   2   58.59    6.46
   2  -4   2   57.80    6.14
   4   0   6  532.28   23.97
  -4   0  -6  520.63   22.64
   4   0   6  514.52   21.75
  -4   0  -6  477.35   20.70
   0   4   3  216.61   12.58
   0  -4   3  217.07   11.79
   0   4   3  220.68   13.03
   0   4  -3  222.82   13.25
   7   0   2 1582.47   56.02
   7   0   2 1662.35   59.65
  -4   2  -5   80.95    7.23
   4  -2   5   76.27    7.97
   4   2   5   75.05    6.97
   4   2   5   78.63    7.48
  -4   2  -5   81.16    7.66
  -4  -2  -5   77.28    6.82
   4  -2   5   81.46    7.88
  -3   4   0   29.58    4.75
   3   4   0   25.99    4.61
   3   4   0   28.92    4.95
  -3   4   0   29.95    4.56
   3  -4   0   30.09    4.48
  -3   4   0   29.52    5.45
  -3  -4   0   26.75    4.28
   5   2  -5 3121.13   96.68
  -5  -2   5 3079.62   96.13
   5   2  -5 2970.51   97.73
   5  -2  -5 3111.47   95.76
  -5  -2   5 3019.55   94.91
  -1   4   3   61.60    6.72
  -1   4   3   63.81    6.41
   1   4  -3   67.47    6.97
  -1   4   3   62.10    6.36
  -5   2  -4   10.39    3.34
   5  -2   4   19.29    4.62
   5   2   4   21.14    4.71
  -5   2  -4   19.27    3.65
   5  -2   4   19.88    4.40
   6   0   4  734.10   29.93
   6   0   4  789.47   33.12
  -6   0  -4  709.38   28.11
  -3  -4   1   92.49    7.58
  -3   4   1   93.68    8.07
  -3   4   1   98.12    8.19
   3  -4  -1   91.80    7.70
   3   4  -1   97.56    9.56
   3   4  -1   92.44    8.34
   7  -1  -3   64.12    6.44
   7   1  -3   63.50    7.52
   7   1  -3   57.87    6.59
  -7  -1   3   62.10    7.19
   2   3   5  696.34   28.05
   2  -3   5  687.16   28.95
   2   3   5  745.87   29.77
  -2   3  -5  682.41   27.68
  -3  -3   5 1064.97   40.62
   3  -3  -5 1094.50   39.22
   3   3  -5 1106.94   40.88
   3   3  -5 1114.79   40.03
  -5  -1   6 2235.19   79.62
  -5  -1   6 2218.01   70.70
   5   1  -6 2116.51   69.29
  -5   1   6 2182.44   70.89
   5  -1  -6 2193.57   70.52
   2   1   7  333.39   16.88
   2  -1   7  341.36   16.23
   2  -1   7  352.27   16.92
   2  -1   7  339.90   17.76
  -2  -1  -7  343.46   16.55
   2   1   7  337.33   16.33
   5   1   5  460.27   21.74
  -5   1  -5  483.91   20.95
  -5  -1  -5  457.08   19.66
  -5   1  -5  464.49   20.02
   5   1   5  485.52   21.45
   5  -1   5  481.26   23.31
   5  -1   5  495.79   22.28
  -5   1  -5  459.69   20.68
   5  -3  -3  426.55   19.16
  -5   3   3  462.14   21.09
   5   3  -3  476.24   23.94
  -5  -3   3  451.87   20.65
  -5  -3   3  455.03   20.37
   5   3  -3  469.40   21.79
  -5   3   3  454.72   20.43
   6   1  -5 2576.13   81.50
  -6  -1   5 2535.18   81.36
  -6  -1   5 2733.33   88.21
   6  -1  -5 2733.09   85.40
   6   1  -5 2560.74   80.40
  -1   4  -3 2941.86   91.96
   1   4   3 2988.04   92.65
   1   4   3 3184.05  100.10
   1   4   3 2871.26  110.70
   5   3   2 1465.23   51.62
  -5   3  -2 1652.51   55.02
   5   3   2 1678.55   56.97
   5  -3   2 1707.65   56.86
  -5   3  -2 1653.52   58.27
  -5  -3  -2 1696.02   55.25
  -5   3  -2 1657.59   56.37
   3   4   1 1152.47   41.45
  -3   4  -1 1163.02   41.87
   3   4   1 1196.88   42.57
  -3  -4  -1 1168.54   41.06
  -3   4  -1 1241.22   47.00
   3  -4   1 1134.29   41.03
  -4  -2   6  439.78   23.86
  -4   2   6  461.13   24.41
  -4  -2   6  444.32   25.13
   4  -2  -6  453.21   24.14
   4   2  -6  448.77   24.27
   4   0  -7   -0.11    2.43
  -4   0   7   -0.37    2.36
   2   4  -3 1536.99   69.79
  -2   4   3 1478.34   66.11
   2  -4  -3 1454.05   65.08
  -2   4   3 1436.36   63.96
   6   2  -4  456.42   24.62
  -6  -2   4  447.92   25.60
  -6  -2   4  430.83   23.76
   6   2  -4  455.67   26.09
   6  -2  -4  445.97   23.74
   4   1   6   17.39    4.19
  -4   1  -6   12.88    3.52
  -4  -1  -6   15.51    4.00
   4   1   6   13.82    3.50
  -4   1  -6   11.27    3.19
   4  -1   6   13.45    3.50
  -4  -1  -6   11.62    3.03
   4  -1   6   13.83    4.49
  -4   1  -6   12.48    3.09
   3   4  -2  514.69   27.90
   3   4  -2  495.67   27.59
  -3   4   2  494.20   25.80
  -3   4   2  512.95   26.96
   3  -4  -2  484.33   25.32
   7  -1   2 2062.73   91.83
   7  -1   2 1989.35   89.33
   7   1   2 2116.94   95.06
   7   1   2 2091.66   93.98
  -1  -2   7   96.59    8.14
  -1   2   7  108.08    9.48
  -1   2   7  102.00    8.77
  -1  -2   7   97.68    8.59
   7   0  -4  358.45   20.56
   0  -2   7   55.10    6.07
   0   2   7   55.31    6.64
   0   2   7   55.67    6.62
   0   2   7   58.34    6.55
   0  -2   7   53.62    6.05
   0  -2   7   55.17    6.13
   3  -2   6  543.45   29.47
  -3   2  -6  593.89   30.52
  -3   2  -6  597.81   30.40
   3   2   6  591.28   29.58
   3  -2   6  582.85   29.45
   3   2   6  587.11   29.96
   6   1   4   34.42    5.84
   6  -1   4   35.80    6.02
   6  -1   4   36.10    6.04
   6   1   4   37.39    5.79
  -6   1  -4   35.93    5.02
  -6   1  -4   32.59    5.32
   6   2   3   84.16    8.73
   6  -2   3   80.99    8.85
  -6   2  -3   88.38    8.13
   6  -2   3   72.79    7.83
  -6   2  -3   78.22    8.53
  -2  -2   7  444.56   23.20
  -2   2   7  492.38   25.69
   2  -2  -7  463.44   24.61
   2   2  -7  473.81   25.58
   7  -2  -1  443.47   23.76
   7  -2  -1  432.22   23.61
   7   2  -1  418.80   24.91
   7   2  -1  447.08   26.19
   3   0   7   -0.50    1.88
   3   0   7    0.10    2.83
  -3   0  -7    0.39    1.74
  -4  -1   7  261.06   15.56
   4   1  -7  245.87   15.60
  -4   1   7  275.40   16.71
  -4  -1   7  264.53   18.22
   7   2   0  599.15   32.81
   7  -2   0  609.76   31.82
   7   2   0  586.99   32.27
   7  -2   0  598.26   30.32
   2   4   3  333.60   19.27
   2   4   3  301.46   17.70
  -2   4  -3  307.63   19.36
   2   4   3  317.50   19.10
   3   4   2  924.59   43.70
  -3  -4  -2  862.35   40.64
   3  -4   2  833.81   41.11
  -3   4  -2  931.81   45.18
   3   4   2  907.40   43.42
  -1   3   6  259.97   16.63
  -1   3   6  255.06   15.75
  -1  -3   6  259.37   15.81
   4   3   4  145.66   11.11
   4  -3   4  157.60   12.70
  -4   3  -4  143.10   10.42
   4   3   4  138.39   10.56
   4  -3   4  155.51   11.64
  -4   3  -4  150.06   12.38
   0   3   6 9347.24  381.23
   0  -3   6 9261.47  377.07
   0   3   6 9069.88  384.36
  -1   0   8 8405.62  345.56
  -1   0   8 8615.27  352.81
  -1   0   8 8683.60  356.61
   1   2   7  533.62   27.21
   1  -2   7  509.01   25.95
   1  -2   7  519.55   26.91
   1   2   7  540.22   27.96
   1   2   7  565.81   29.26
   0   0   8  256.14   15.75
   0   0   8  237.85   15.14
   0   0   8  233.76   15.23
   7  -2  -2 1100.58   50.32
   7   2  -2 1102.58   52.60
   7   2  -2 1086.17   52.57
   7  -1  -4  812.49   38.64
   7   1  -4  768.73   38.26
  -7  -1   4  819.25   41.08
   7   1  -4  759.68   36.88
   7   0   3    0.24    3.14
   7   0   3    1.69    3.57
   6   3  -1  311.72   20.14
   6  -3  -1  314.10   17.94
  -6  -3   1  332.02   18.64
  -6  -3   1  316.55   18.35
  -6   3   1  328.21   20.95
   6   3  -1  317.55   20.65
   0   4  -4   66.11    7.08
   0   4   4   68.16    7.16
   0   4   4   67.75    6.96
   0   4  -4   70.14    7.78
  -6  -3   0  258.38   15.35
   6   3   0  237.36   16.35
  -6   3   0  255.45   17.78
   6  -3   0  246.50   15.16
   6   3   0  250.68   17.78
   3  -3   5   72.82    8.17
   3   3   5   73.08    7.59
  -3   3  -5   69.35    7.56
   3   3   5   68.91    6.96
  -3   3  -5   71.77    7.30
  -1   4   4   96.00    8.42
   1   4  -4  104.57    9.87
  -1   4   4   99.26    8.53
  -1   4   4   96.96    8.89
   4   3  -5    7.10    2.72
   4   3  -5    7.34    3.05
   4  -3  -5    7.18    2.97
   2   0  -8  831.75   40.20
  -2   0   8  902.63   42.37
   2  -3  -6   19.89    4.21
  -2   3   6   20.84    4.43
  -2  -3   6   20.15    3.93
  -3   4   3  164.27   11.87
   3  -4  -3  164.09   11.63
  -3   4   3  173.04   12.04
   3   4  -3  179.45   13.67
   3   4  -3  156.10   11.25
   5  -3  -4  892.80   41.85
  -5   3   4  898.19   42.57
   5   3  -4  926.03   43.66
  -5  -3   4  918.45   43.13
   5   3  -4  948.55   47.04
  -5  -3   4  925.58   44.88
  -4   4   0  101.36    9.06
   4   4   0   98.19    9.26
   4  -4   0   97.80    8.33
  -4   4   0  103.41   10.19
   4   4   0   93.62    9.28
  -4   4   0   97.89    8.70
  -4  -4   0   95.62    8.16
   5   3   3  466.75   25.26
  -5   3  -3  487.02   25.46
  -5   3  -3  476.03   25.05
   5  -3   3  450.08   25.00
  -5   3  -3  472.07   27.12
   5  -3   3  475.24   25.40
   4   4  -1  238.18   16.00
  -4  -4   1  223.67   13.88
   4   4  -1  228.52   16.51
  -4   4   1  240.71   15.25
   4  -4  -1  223.53   14.10
  -4   4   1  225.42   15.48
   7  -2   1    7.73    3.23
   7  -2   1   14.36    4.21
   7   2   1    8.07    4.30
   1   3   6 1224.94   55.43
   1   3   6 1299.76   59.37
   1  -3   6 1220.33   55.10
   1   3   6 1257.33   57.40
   8   0  -1   -0.51    2.89
   8   0  -1    0.10    3.34
   3   1   7  102.31    9.14
   3  -1   7   97.63    9.45
  -3  -1  -7  103.76    8.62
   3  -1   7   96.00    8.21
  -3   1  -7   97.36    8.67
   3   1   7   97.19    8.35
  -6   0   6  546.20   29.57
   6   0  -6  497.62   26.19
   6   3  -2  216.25   16.28
  -6  -3   2  203.91   13.37
   6  -3  -2  198.50   12.96
   6   3  -2  204.82   15.04
  -6  -3   2  205.49   13.44
  -3  -2   7    6.84    2.74
   3   2  -7    8.16    3.16
   3  -2  -7    6.68    3.24
  -3   2   7    8.06    3.26
   8   0   0 1485.81   68.70
   8   0   0 1393.07   64.56
  -1   4  -4  574.78   30.50
   1   4   4  509.37   26.66
   1   4   4  509.72   26.55
  -1   1   8 2777.41  118.14
  -1  -1   8 2858.10  120.75
  -1  -1   8 2940.07  124.49
  -1  -1   8 2731.60  116.74
  -1  -1   8 2897.82  123.17
  -1   1   8 2860.06  123.18
   1   0   8   29.45    4.54
   1   0   8   25.69    4.36
   1   0   8   33.22    5.05
   6   3   1   82.07    8.64
   6   3   1   87.23    9.41
  -6   3  -1   74.58    8.30
   6  -3   1   83.04    7.80
   4  -4   1  901.76   41.96
  -4   4  -1 1008.40   49.56
   4   4   1  921.24   45.35
   4   4   1  894.29   42.78
  -4   4  -1  972.69   45.78
  -4  -4  -1  955.34   44.23
  -4   4  -1  937.49   45.12
   8   0  -2 2022.13   88.50
  -2   4   4   65.07    6.77
  -2   4   4   65.15    6.85
  -2   4   4   58.94    6.92
   2   4  -4   65.12    7.95
   0   1   8   28.51    4.95
   0  -1   8   25.93    4.47
   0  -1   8   27.69    4.34
   0   1   8   30.83    4.93
   0   1   8   30.06    4.82
   0  -1   8   28.74    4.60
   0  -1   8   27.30    4.51
   7  -1   3   72.24    8.49
   7   1   3   66.82    7.94
   7  -1   3   64.25    7.74
   7   1   3   75.28    8.89
  -4   4   2  335.33   19.58
   4  -4  -2  315.30   18.12
   4   4  -2  337.91   21.12
   4   4  -2  347.73   21.07
  -4   4   2  327.30   19.04
   7   2  -3   33.77    5.98
   7   2  -3   32.58    5.48
   7  -2  -3   31.15    4.95
  -7  -2   3   28.56    4.83
  -5   0   7   -0.08    3.02
   5   0  -7    0.45    2.54
   5  -2  -6  533.93   27.45
  -5   2   6  541.20   27.86
   5   2  -6  523.55   27.25
  -5  -2   6  548.64   29.03
  -2  -1   8   13.24    3.49
  -2   1   8   12.53    4.04
  -2  -1   8   11.66    2.97
  -2   1   8   10.70    3.20
  -5   0  -611057.34  449.68
   5   0   611760.93  361.15
   5   0   612185.21  376.92
  -5   0  -611709.59  359.26
   2  -2   7  323.34   18.26
   2   2   7  340.25   19.74
   2  -2   7  322.48   18.51
   2   2   7  336.09   19.17
   5  -2   5   12.07    3.79
   5   2   5   13.77    3.70
  -5   2  -5    9.29    3.23
   5  -2   5   14.69    4.03
   5   2   5   13.72    4.38
  -5   2  -5   13.14    3.28
  -5   2  -5   12.63    3.75
   6   2  -5    0.53    2.33
  -6  -2   5    0.73    2.30
   6   2  -5    0.84    2.57
  -6  -2   5    1.04    2.79
   6  -2  -5    1.05    2.67
   3   0  -8    5.19    3.02
  -3   0   8    5.92    2.82
   6   0   5    0.02    3.47
   6   0   5    0.98    2.74
   7   0  -5   -0.48    2.56
   7   0  -5    0.62    2.70
   8  -1  -1   80.09    8.36
   8   1  -1   69.31    8.49
   8  -1  -1   86.91    8.58
  -3   4  -3 1125.65   53.76
   3   4   3 1026.59   48.23
   3   4   3 1052.66   48.51
  -3  -4  -3 1083.11   49.56
  -3   3   6   32.67    5.01
   3   3  -6   35.98    5.23
   3  -3  -6   33.01    4.95
   8   0   1   -0.18    3.31
   8   0   1    0.08    3.43
  -6  -1   6  257.22   17.49
   6   1  -6  234.39   14.96
   6  -1  -6  245.51   15.36
   8  -1   0  756.62   37.91
   8  -1   0  781.58   38.74
  -4   2  -6   27.19    4.56
   4   2   6   26.45    4.37
   4  -2   6   28.63    4.72
  -4   2  -6   28.59    4.69
   4   2   6   30.59    4.90
   4  -2   6   36.12    5.82
   1   1   8 1902.32   65.61
   1   1   8 1852.37   64.06
   1  -1   8 1820.46   62.84
   1  -1   8 1862.47   63.98
   1   1   8 1915.39   66.92
   1  -1   8 1832.77   64.70
   1  -1   8 1829.37   63.06
   7   2   2    7.36    3.66
   7  -2   2    8.55    3.96
   7   2   2    8.56    4.10
   7  -2   2    7.34    3.58
  -6  -3   3 2821.02   93.40
  -6   3   3 2956.10   98.12
  -6  -3   3 2792.19   92.28
   6   3  -3 2868.15   98.90
   6  -3  -3 2804.62   92.45
   6   3  -3 2841.74   95.36
   2   3   6   34.52    5.02
   2   3   6   36.74    5.38
   8   1  -2  119.22   10.08
   8   1  -2  143.18   11.41
   8  -1  -2  126.19    9.80
   8  -1  -2  117.32    9.21
  -2   4  -4 4023.79  137.81
   6  -2   4  378.47   19.67
   6   2   4  340.71   18.33
   6  -2   4  323.47   18.47
  -6   2  -4  345.62   16.93
   8   0  -3   -1.40    2.53
  -4   4  -2   90.39    8.09
   4   4   2   95.40    8.39
  -4   4  -2  102.10    9.42
   4   4   2   92.53    8.31
  -4  -4  -2   96.52    7.94
  -5  -1   7  358.88   19.78
   5   1  -7  334.03   17.29
   6  -3   2 1207.03   45.15
   6   3   2 1078.60   42.02
  -6   3  -2 1219.74   49.74
   6  -3   2 1186.62   44.11
  -6   3  -2 1187.59   44.92
   6   3   2 1173.68   45.27
  -6   3  -2 1214.12   44.71
  -5   1  -6 3206.01  128.77
  -5   1  -6 3603.51  116.44
   5  -1   6 3568.96  123.14
   5  -1   6 3340.36  109.44
   5   1   6 3513.99  119.59
   5   1   6 3590.81  117.18
  -5  -1  -6 3337.08  108.35
   4   0   7   -1.03    2.32
  -4   0  -7    0.14    2.01
   4   0   7   -0.68    2.37
  -4   0  -7    0.55    2.28
   3   4  -4  290.95   18.03
   3  -4  -4  263.06   14.40
  -3   4   4  279.20   15.28
   3   4  -4  225.43   13.08
   2   0   8  451.42   20.48
   2   0   8  490.08   22.60
  -3   1   8   22.35    4.24
   3   1  -8   23.56    4.44
   6   1   5 2582.34   88.30
   6  -1   5 2676.45   99.29
   6  -1   5 2600.49   88.80
  -6   1  -5 2462.89   83.20
   6   1   5 2703.46   90.96
  -6   1  -5 2930.18   95.75
  -6  -1  -5 2668.93   89.25
   7   1  -5    2.47    2.93
   7   1  -5    2.86    2.49
   7  -1  -5    5.05    3.22
   4   4  -3   39.54    5.46
  -4   4   3   42.04    5.49
   4  -4  -3   42.54    5.29
   4   4  -3   43.59    6.60
  -4   4   3   40.24    5.51
   4   2  -7 3781.39  123.58
   4  -2  -7 3827.79  124.49
  -4   2   7 3934.30  126.78
  -4  -2   7 3935.46  127.26
   8  -1   1 1646.06   59.62
   8   1   1 1705.43   62.76
   8  -1   1 1759.87   63.48
   8   1   1 1530.07   59.81
   7   0   419146.50  596.24
   7   0   421019.15  628.47
  -4   3  -5   31.21    4.61
   4  -3   5   27.31    5.05
   4   3   5   29.71    4.83
  -4   3  -5   17.19    3.95
   4   3   5   26.99    4.64
   4  -3   5   29.40    4.65
   5   3  -5 1133.58   42.40
   5  -3  -5 1157.25   42.77
  -5   3   5 1146.10   43.11
   5   3  -5 1232.93   47.77
   7   2  -4  637.30   27.28
  -7  -2   4  652.50   28.06
   7  -2  -4  643.38   27.13
   7   2  -4  645.67   29.11
   5  -3   4  205.26   13.79
  -5   3  -4  184.28   13.44
   5  -3   4  208.56   12.65
   5   3   4  202.51   12.75
  -5   3  -4  206.54   12.00
   5   3   4  217.71   13.62
   8  -1  -3  748.29   30.29
   8   1  -3  714.40   30.02
   8   1  -3  741.99   31.90
   0   4   5  968.76   38.03
  -1   4   5 3239.77  108.41
   8   0   2  484.66   24.12
   8   0   2  511.64   25.35
  -4   0   8 2682.41   90.33
   4   0  -8 2432.50   82.52
  -4  -1  -7 2836.53   93.55
   4   1   7 2784.42   93.77
   4   1   7 2635.48   87.55
  -4   1  -7 2845.86   94.31
   4  -1   7 2700.30   93.20
  -4   1  -7 2955.57   98.29
   4  -1   7 2892.42   96.10
  -5   4   1  220.74   13.04
   5   4  -1  213.90   13.99
  -5  -4   1  225.32   13.22
   5  -4  -1  217.36   12.46
  -5   4   1  226.89   14.80
   5   4  -1  211.09   14.76
   5   4   0 6011.10  193.01
   5   4   0 6107.23  207.24
  -5   4   0 6013.59  208.01
   5  -4   0 5688.43  179.26
  -5  -4   0 5995.99  187.87
  -5   4   0 6031.08  194.20
  -2  -1  -8    0.41    2.15
   2  -1   8    0.09    2.17
   2   1   8    0.47    2.28
   2   1   8    0.47    2.49
   2  -1   8    0.01    1.90
   3   2   7 2083.87   78.69
  -3   2  -7 1957.50   67.50
  -3   2  -7 1942.24   68.66
   3  -2   7 2039.30   69.46
   3   2   7 2133.77   73.31
   4   3  -6  100.59    8.33
   4  -3  -6   99.66    8.25
  -1   2   8  809.84   32.09
  -1  -2   8  817.10   33.05
  -1   2   8  891.36   35.59
  -1  -2   8  831.78   32.68
   7   1   4 3088.88  105.14
   7  -1   4 2810.63  100.44
   7  -1   4 2919.89   98.84
   7   1   4 3129.65  106.90
   1   4   5 6773.90  215.66
   1   4   5 6918.81  227.91
  -2   4   5  481.44   22.74
  -2   4   5  467.76   21.72
   6   3  -4   37.65    5.35
  -6  -3   4   32.91    5.13
   6  -3  -4   33.75    4.96
   6   3  -4   34.67    6.05
  -6   3   4   29.53    4.91
   8   0  -4  909.77   35.87
   0   5   0    0.28    2.74
   0   5   0    0.93    1.66
   0  -5   0    0.52    1.84
   0   5   0    0.33    1.75
  -1   3   7 4223.53  169.04
  -1   3   7 4947.60  157.41
   0   2   8  583.45   25.03
   0   2   8  584.75   25.79
   0  -2   8  569.18   24.60
   0   2   8  610.04   26.68
   7  -2   3  304.35   16.79
   7   2   3  317.03   18.15
   7  -2   3  314.67   18.18
   0   3   7  101.42    8.65
   0   3   7  101.76    9.08
  -3   4  -4   92.50    7.98
   3   4   4  109.38    8.57
  -3   4  -4  104.89   10.01
  -3   3  -6 1055.40   40.30
   3   3   6  938.04   36.62
   3   3   6 1034.38   39.79
  -5   4   2  701.59   28.85
  -5  -4   2  680.74   27.74
   5  -4  -2  674.77   27.71
  -5   4   2  718.73   30.58
   5   4  -2  700.18   31.28
   5   4  -2  695.61   30.98
  -5   4  -1 1469.59   55.25
  -5   4  -1 1561.40   56.21
  -5  -4  -1 1539.44   53.61
   5   4   1 1424.14   53.32
   5  -4   1 1469.74   51.43
   5   4   1 1578.52   57.56
  -5   4  -1 1520.78   56.20
   4   4   3 1234.44   46.07
  -4   4  -3 1172.92   46.55
   4   4   3 1327.93   48.64
  -4   4  -3 1283.24   46.21
   8  -1   2   -0.26    3.01
   8   1   2   -0.15    3.20
   8   1   2   -2.03    3.42
   8  -1   2    5.34    3.70
   0   5  -1  127.12    9.87
   0   5  -1  131.79   10.04
   0   5   1  136.19   10.39
   0   5  -1  143.57   10.74
   0  -5   1  118.46    8.34
   0   5   1  137.56    9.77
   0   5   1  134.71    9.70
  -1   5   0  262.98   14.90
   1  -5   0  236.01   12.63
   1   5   0  269.33   14.83
   1   5   0  259.11   15.05
  -1   5   0  249.50   13.86
   1   5   0  275.07   15.60
  -2  -2   8 1919.99   67.41
  -2   2   8 1828.86   63.66
  -2   2   8 1900.64   66.60
   4   1  -8  136.69   10.09
  -4   1   8  140.73    9.81
   6   3   3  167.65   11.93
   6  -3   3  183.81   12.49
  -6   3  -3  176.22   11.10
  -6   3  -3  182.53   11.53
   6  -3   3  171.13   11.28
  -6   3  -3  180.39   13.27
  -2   3   7  509.23   25.69
  -2   3   7  627.28   26.56
   7   3  -1 1096.74   44.22
   7  -3  -1 1117.42   41.21
   7   3  -1 1146.32   45.82
   1   5  -1  166.10   12.40
  -1   5   1  169.11   10.80
   1   5  -1  181.69   12.14
  -1  -5   1  159.36    9.98
  -1   5   1  166.17   11.19
   1   5  -1  164.27   10.52
   6   0  -7    3.28    2.95
   8  -2  -1  198.50   12.41
   8   2  -1  192.10   13.81
   8   2  -1  202.69   14.30
   8  -2  -1  209.84   12.72
  -4   4   4  119.83    9.26
   4   4  -4  124.27   11.02
   4  -4  -4  116.43    8.88
   4   4  -4  115.03    8.55
   6   2  -6  125.87    9.50
   6  -2  -6  123.69    9.35
   6   2  -6  113.03    9.28
   7  -3   0  495.75   22.04
   7   3   0  477.13   24.07
   7   3   0  490.77   24.88
  -1   5  -1   80.12    7.16
   1   5   1   88.70    8.23
   1   5   1   86.23    7.66
  -1   5  -1   83.60    8.73
   1   5   1   85.72    7.59
   7   0  -6 1268.85   46.51
   3   0   8   49.63    5.63
   3   0   8   54.53    6.70
   8   2   0  642.73   30.55
   8   2   0  666.97   30.67
   8  -2   0  661.22   27.96
   8  -2   0  660.12   27.85
   8   1  -4 2490.04   83.72
   8  -1  -4 2581.45   85.57
   8  -1  -4 2280.57   78.14
   8   1  -4 2494.51   85.24
   1   3   7 2157.47   74.38
   1   3   7 2355.94   78.64
   1  -2   8    0.78    1.94
   1   2   8    0.88    2.95
   1   2   8    1.05    2.42
   1   2   8    0.57    2.60
   8   2  -2  281.08   17.27
   8   2  -2  256.31   15.75
   8  -2  -2  274.88   15.47
   8  -2  -2  248.08   13.93
   7   3  -2 7161.79  227.10
   7   3  -2 7343.89  234.33
   7  -3  -2 7020.53  219.05
  -2   4  -5   73.83    7.67
   2   4   5   78.80    7.37
   2   4   5   82.16    8.17
   3   4  -5  877.16   39.29
   3   4  -5  889.07   35.44
  -3   4   5  819.24   33.64
   3  -4  -5  850.52   33.44
   0   5  -2  112.17    9.11
   0   5   2  110.18    9.17
   0   5   2  113.07    8.78
   0   5   2  111.63    8.89
   5  -2  -7 1547.26   54.70
   5   2  -7 1521.63   54.28
  -5   2   7 1567.32   55.43
  -5  -2   7 1532.58   54.98
   2   5   0 1231.86   46.47
  -2   5   0 1129.23   43.15
   2   5   0 1186.15   45.40
   2   5   0 1222.10   45.15
  -2   5   0 1194.52   44.94
   5  -2   6  474.92   23.10
   5   2   6  474.61   22.66
  -5   2  -6  377.33   18.62
   5  -2   6  448.73   21.82
   5   2   6  482.67   21.36
  -5   2  -6  453.38   20.76
  -1   0   9    0.42    2.34
  -1   0   9    0.33    2.15
  -1   0   9   -0.33    2.34
   8   0   3    0.00    3.56
   8   0   3   -0.63    3.64
  -5   4   3   -0.21    2.41
   5   4  -3    0.91    3.16
   5  -4  -3    0.53    2.38
   5   4  -3    1.26    2.37
  -1   5   2  318.66   16.00
  -1   5   2  309.35   16.21
   1   5  -2  326.32   17.22
  -5   4  -2   11.15    3.32
   5   4   2   10.11    3.68
  -5   4  -2   10.35    3.99
   5   4   2    9.72    3.90
  -5   4  -2   11.77    3.12
   7   3   1  197.22   14.58
   7   3   1  209.36   14.74
   7  -3   1  213.84   12.77
   7  -3   1  214.65   12.89
   3  -2  -8 1561.49   54.28
  -3   2   8 1527.74   52.86
   3   2  -8 1493.03   53.74
   2   5  -1    0.16    0.81
  -6   2  -5  214.40   12.20
   6   2   5  275.31   15.77
   6  -2   5  281.11   17.00
   6   2   5  279.67   15.32
   6  -2   5  279.86   16.25
  -6   2  -5  232.50   18.35
   6   0   6 3884.91  124.31
   6   0   6 3036.74  100.90
  -6   0  -6 3968.32  122.64
   7  -2  -5   18.30    4.23
   7   2  -5   16.79    4.20
  -7  -2   5   16.98    4.17
   7   2  -5   17.13    4.28
   6   1  -7  339.59   17.16
   0   0   9   -0.53    2.38
   0   0   9   -0.54    2.00
   0   0   9   -0.03    1.99
   8   2   1  500.23   24.95
   8  -2   1  465.97   21.51
   8  -2   1  426.44   20.53
   7   1  -6 1116.50   41.03
   7  -1  -6 1114.71   40.48
   7   1  -6 1158.72   43.33
   1   5   2   12.62    3.18
   1   5   2   15.38    4.23
   1   5   2   16.23    3.72
   3   1   8 1397.42   48.02
   3  -1   8 1398.37   51.24
   3   1   8 1375.98   48.93
   3  -1   8 1471.53   50.22
  -3   3   7  283.59   14.87
   3   3  -7  283.68   15.45
   3  -3  -7  289.93   15.22
   2   5   1   20.70    4.15
  -2   5  -1   18.03    3.79
   2   5   1   16.99    4.22
  -2   5  -1   18.45    3.96
   2   5   1   17.90    3.82
  -2   5  -1   18.51    4.37
  -2   0   9    0.87    2.47
  -2   0   9    0.07    2.33
  -5   0   8   41.80    5.94
   5   0  -8   39.39    5.60
   5   0   7   -0.07    3.16
   5   0   7   -0.00    2.55
  -5   0  -7    0.26    1.90
   8   2  -3  511.37   24.68
   8   2  -3  515.77   23.48
   8  -2  -3  532.94   22.68
   7   3  -3  902.55   37.41
   7  -3  -3  864.99   32.76
   7   3  -3  871.89   34.73
   7   0   5    1.71    3.18
   7   0   5   -0.08    3.79
   5   3  -6   85.05    7.88
   5   3  -6   81.86    7.31
   5  -3  -6   85.58    7.54
   9   0  -1    1.04    3.22
   9   0  -1    0.16    3.80
   8   0  -5    0.55    2.70
   8   0  -5   -0.57    2.74
  -2   5   2    0.67    1.90
   2   5  -2    1.13    2.35
   2   5  -2    1.14    2.19
  -2   5   2    0.61    2.26
   2   5  -2    1.02    2.46
  -1   1   9  187.05   12.00
  -1   1   9  190.35   11.86
  -1  -1   9  182.33   11.30
  -1   1   9  196.90   12.59
  -1  -1   9  187.66   11.93
   8  -1   3 1390.43   51.86
   8   1   3 1652.67   59.93
   8  -1   3 1456.33   53.33
   8   1   3 1513.11   56.40
   2   3   7   21.78    4.50
   5  -3   5  365.53   19.64
   5   3   5  376.45   18.62
  -5   3  -5  317.93   22.24
  -5   3  -5  375.29   17.68
   5   3   5  379.33   18.45
   6   3  -5 2852.36   98.99
   6   3  -5 2874.58   91.97
   6  -3  -5 2789.02   89.39
  -6   3   5 2657.82   85.99
  -4   2  -7  624.41   26.32
   4   2   7  666.73   26.78
  -4   2  -7  634.65   26.33
   4   2   7  627.64   26.32
   4  -2   7  615.60   25.99
   2   2   8  277.30   15.22
   2   2   8  274.82   14.69
   2  -2   8  268.21   14.04
   6   1   6 2943.99   94.37
  -6   1  -6 2905.47   92.49
   6   1   6 2795.02   98.21
   6  -1   6 2921.79   97.54
   6  -1   6 2514.43   82.48
   1   0   9   -0.80    2.31
   1   0   9    0.18    2.45
   1   0   9    0.43    2.15
   9   0   0   18.00    5.09
   9   0   0   14.61    5.30
   0   1   9  328.16   16.88
   0  -1   9  315.18   16.05
   0   1   9  319.82   16.66
   0  -1   9  296.89   15.26
   0   1   9  324.61   16.44
   9   0  -2    5.91    3.72
  -1   4   6   17.29    3.90
  -1   4   6   21.42    4.74
  -4   4  -4    1.37    1.85
  -4   4  -4    0.83    2.81
   4   4   4    0.63    2.39
  -2  -1   9 1338.37   46.76
  -2   1   9 1481.66   52.65
  -2  -1   9 1456.87   50.91
  -2   1   9 1424.15   49.36
   0   4   6 1750.38   60.58
   0   4   6 1582.82   55.34
   0   4   6 1670.03   56.82
   7  -2   4 1505.03   53.70
   7   2   4 1732.16   61.18
   7  -2   4 1600.41   57.45
   5   1  -8  597.19   25.61
  -2   5  -2 1594.87   55.52
   2   5   2 1643.55   58.12
   2   5   2 1605.04   55.81
   2   5   2 1586.84   54.45
   3   0  -9    0.11    2.75
  -3   0   9    0.30    2.64
  -4   3  -6  111.68    8.85
   4   3   6  106.94    8.44
  -4   3  -6  100.08    9.00
   4   3   6  108.88    8.95
   0   5   3    1.61    2.52
   0   5   3    2.88    2.44
   0   5   3    3.52    3.23
   0   5  -3    2.84    2.43
   7   3   2   58.97    7.46
   7  -3   2   56.27    6.48
   7   3   2   58.15    7.71
   7  -3   2   58.78    6.36
   5  -1   7  689.71   28.27
   5   1   7  748.99   29.70
  -5   1  -7  646.59   27.03
   5   1   7  735.56   31.30
   5  -1   7  736.92   31.92
  -5   1  -7  717.94   28.44
  -3   5   0 1339.08   49.86
   3   5   0 1331.49   49.49
   3   5   0 1402.20   49.91
   3   5   0 1388.98   48.49
  -1   5   3  195.38   11.81
  -1   5   3  175.77   11.75
   1   5  -3  187.05   12.12
  -6   3  -4 1650.78   59.07
  -6   3  -4 1631.99   55.27
   6  -3   4 1608.33   57.03
   6   3   4 1648.80   57.44
   6  -3   4 1573.48   54.15
   6   3   4 1578.70   55.77
  -6   3  -4 1677.96   56.66
   3   5  -1    5.34    2.84
  -3   5   1    7.67    3.00
   3   5  -1    5.34    3.30
  -3   5   1    4.80    2.86
   6   4  -1 4216.86  135.73
  -6   4   1 4218.19  131.64
   6  -4  -1 4133.92  127.40
   6   4  -1 4421.63  139.84
   8  -2   2 1323.11   47.48
   8  -2   2 1393.57   50.66
   8   2   2 1503.91   55.21
   8   2   2 1338.96   51.42
   6  -4   0 2320.59   74.83
   6   4   0 2336.31   80.54
  -6   4   0 2541.37   86.20
   6   4   0 2406.97   80.36
  -6   4   0 2291.02   77.71
   3   4   5  245.82   13.64
   3   4   5  265.06   14.98
   7  -1   5  465.52   23.22
   7  -1   5  457.99   22.82
   7   1   5  468.23   23.18
   7   1   5  435.78   20.99
   4   4  -5 1026.73   41.31
   4  -4  -5  964.71   35.80
   4   4  -5  862.40   46.42
  -4   4   5  999.71   37.42
   9   1  -1    8.35    4.36
   9  -1  -1    5.72    3.69
   9  -1  -1    8.37    3.70
   8  -1  -5  267.30   14.35
   8   1  -5  245.00   13.77
   8   1  -5  250.97   14.46
  -4   2   8  751.89   29.40
   4   2  -8  755.73   30.22
   4  -2  -8  782.96   31.01
  -2   4   6  804.75   32.23
   5   4  -4  588.27   27.84
   5  -4  -4  537.33   22.78
   5   4  -4  570.13   24.11
  -5   4   4  555.47   23.91
  -1   5  -3  252.73   15.19
   1   5   3  219.78   12.71
  -1   5  -3  210.11   12.78
   1   5   3  220.34   12.96
   1   5   3  209.55   12.90
   5   4   3   80.02    7.93
  -5   4  -3   79.97    8.68
   5   4   3   85.02    8.19
  -5   4  -3   81.60    7.15
   9   0   1   -0.27    4.57
   9   0   1    0.64    3.86
  -3   5  -1 1860.53   63.26
   3   5   1 1820.64   61.03
   3   5   1 1823.83   63.38
   3   5   1 1843.33   63.17
   1   4   6   38.41    5.39
   1   4   6   46.22    6.67
   1   1   9 1005.55   37.07
   1   1   9  964.17   36.14
   1  -1   9  948.62   35.46
   1   1   9 1021.02   38.42
   9  -1   0  797.01   32.29
   9  -1   0  787.30   31.99
  -4   3   7 1071.98   39.37
   4  -3  -7 1010.18   37.40
   4   3  -7  993.09   37.24
   4   0   8  493.24   21.26
   4   0   8  485.98   22.68
  -4   0  -8  492.07   21.61
   9  -1  -2 1522.89   53.03
   9   1  -2 1442.10   52.44
   9   1  -2 1365.35   49.34
   9  -1  -2 1495.32   52.19
  -6   4   2  205.43   12.38
   6   4  -2  223.80   15.07
   6  -4  -2  210.41   12.14
   6   4  -2  212.43   14.02
   9   0  -3    0.33    3.29
  -2   5   3   54.29    6.28
  -2   5   3   60.96    6.23
  -2   5   3   58.95    6.33
   2   5  -3   63.81    7.23
   3   1  -9    1.12    2.54
   3  -1  -9    1.81    2.90
  -3   1   9   -0.26    2.50
   8   2  -4    1.27    3.24
   8   2  -4   -0.06    2.49
   8  -2  -4    0.92    3.04
   3   5  -2 1298.05   48.33
  -3   5   2 1329.05   47.61
   3  -5  -2 1296.99   46.85
   3   5  -2 1425.10   51.45
  -3   5   2 1340.94   47.42
  -6   4  -1 1649.57   58.55
   6  -4   1 1718.53   57.24
   6   4   1 1840.31   65.34
   6   4   1 1736.14   61.27
  -6   4  -1 1766.20   59.86
   7   3  -4   15.61    3.97
   7   3  -4   17.88    4.92
   7  -3  -4   15.20    3.75
   2   0   9   -0.16    2.49
   2   0   9    0.10    2.07
   8   0   4 3359.58  110.85
   8   0   4 3427.65  114.53
   7   0  -7   -0.32    2.89
   9  -1   1   24.23    5.28
   9   1   1   17.25    5.62
   9  -1   1   14.95    4.28
   9   1   1   16.78    5.07
   6   2  -7  513.02   22.56
   6  -2  -7  525.62   22.84
   3   3   7  181.26   11.80
   3  -4  -6 1143.17   41.24
   4   1   8 1636.11   55.65
   4  -1   8 1647.33   56.43
   4   1   8 1644.57   58.14
   2   5   3    0.25    3.23
   2   5   3   -0.07    2.54
  -2   5  -3    0.24    2.57
   4   0  -9   -1.25    2.64
   7  -2  -6    3.71    3.23
   7   2  -6    3.43    3.03
   7   2  -6    3.15    2.63
   3   5   2 5207.72  161.09
  -3   5  -2 5365.99   64.47
   3   5   2 5468.84   64.07
   3   5   2 5140.24  157.11
   3   2   8 1466.92   51.67
   3  -2   8 1449.49   43.20
   3   2   8 1473.99   50.50
   9  -1  -3  244.11   13.72
   9   1  -3  237.18   14.68
   9   1  -3  233.51   13.79
  -1   3   8   92.44    7.51
   6  -4  -3  100.84    7.51
  -6   4   3  105.24    8.02
   6   4  -3  106.53    9.70
   6   4  -3  101.72    8.29
   2   4   6  353.38   14.21
   2   4   6  387.47   15.59
   0   3   8  144.75    9.15
   0   3   8  172.35   11.53
   7  -3   3  909.06   30.73
   7  -3   3  942.58   32.61
   7   3   3  925.18   32.88
   6   0  -8  300.35   13.46
   9   0   2  457.16   21.35
   9   0   2  463.12   22.00
   0   5  -4  270.83   13.11
   0   5   4  275.08   13.63
   0   5   4  270.52   12.60
   2  -1   9  161.98    9.08
   2   1   9  183.69   10.10
   2   1   9  154.17    9.78
   8   1   4  658.19   27.41
   8   1   4  628.78   26.02
   8  -1   4  606.96   25.85
   8  -1   4  641.01   26.18
  -1   5   4 1691.80   49.67
   1   5  -4 1856.67   56.63
  -2   3   8 2283.37   63.11
   6   4   2  271.07   13.62
  -6   4  -2  280.11   13.27
   6   4   2  268.81   13.84
  -6   4  -2  287.01   12.86
   3  -5  -3  524.51   21.41
  -3   5   3  554.59   21.66
  -3   5   3  533.96   20.92
   3   5  -3  545.85   23.38
  -1   2   9  578.50   23.14
  -1  -2   9  557.84   21.84
  -1   2   9  515.83   20.78
  -1   2   9  535.27   21.33
   8  -2   3  363.89   15.91
   8  -2   3  373.73   16.70
   8   2   3  385.62   17.32
  -4   5   0  270.56   12.20
   4   5   0  252.05   13.78
  -4   5   0  257.20   14.01
   4   5   0  269.54   13.34
   8   0  -6 2530.40   68.46
   9   0  -4  467.51   19.96
  -4   5   1   15.27    4.19
   4   5  -1   17.22    4.58
  -4   5   1   18.34    3.84
   4   5  -1   14.36    4.09
   7   1  -7    2.55    3.01
   6   2   6   26.54    4.81
   6  -2   6   33.59    5.72
   6   2   6   35.28    5.44
   6  -2   6   32.54    5.59
  -6   2  -6   34.27    5.04
   8   3  -1    5.16    4.15
   8  -3  -1    4.89    3.03
   8   3  -1    2.32    3.71
   0   2   9  104.12    7.85
   0   2   9  107.60    8.38
   0   2   9  103.34    8.23
   0  -2   9  102.58    7.69
  -6   3   6 1280.97   39.60
   6   3  -6 1383.74   41.98
   6  -3  -6 1351.91   40.88
   6   3  -6 1351.52   42.92
   4   1  -9 1314.29   40.99
   4  -1  -9 1262.12   39.74
  -4   1   9 1295.41   39.56
   8   3   0  598.84   26.03
   8  -3   0  592.31   22.23
   8   3   0  576.66   25.21
  -2   2   9  292.99   13.71
  -2   2   9  295.81   12.81
  -2  -2   9  290.83   13.25
   1   5   4  792.26   27.51
  -1   5  -4  873.77   31.78
   1   5   4  811.47   29.14
   5  -2  -8   10.75    3.62
   5   2  -8    9.37    3.41
  -5   2   8   10.90    3.10
   1   3   8  347.61   14.58
   1   3   8  361.62   13.94
   4   4   5   16.61    3.87
   4   4   5   14.92    4.15
   4   5   1  616.47   24.29
   4   5   1  573.08   23.68
   5   2   7   31.26    4.91
   5   2   7   34.61    5.69
   5  -2   7   34.44    5.24
  -5   2  -7   33.00    4.99
   5  -4  -5  409.27   14.90
   5   4  -5  437.88   21.26
   5   4  -5  405.06   14.48
  -5   4   5  401.85   15.01
   8   3  -2  986.17   35.70
   8  -3  -2 1039.36   33.13
   8   3  -2 1066.53   38.03
  -2   5   4  211.10   10.90
   2   5  -4  240.48   13.47
  -2   5   4  201.20   12.40
   6   1  -8  160.18    9.81
  -5   4  -4 1360.15   51.12
   5   4   4 1400.74   43.19
   9  -1   2 6408.14  166.97
   9   1   2 6681.48  174.21
   9  -1   2 6736.33  168.89
   9   1   2 6518.19  166.15
  -4   5   2 1621.02   47.62
  -4   5   2 1613.17   48.77
   4   5  -2 1657.57   50.72
   4   5  -2 1537.68   48.93
  -6   0  -7    0.97    2.03
   6   0   7    0.36    2.93
   6   0   7   -0.07    2.63
   5   3  -7  444.78   18.69
   5  -3  -7  459.67   18.94
   7  -2   5    8.16    4.31
   7  -2   5    8.61    3.86
   7   2   5    7.55    3.19
   7   2   5    8.93    4.17
   9   2  -1  272.02   14.85
   9  -2  -1  287.58   12.84
   9  -2  -1  277.30   12.79
   9   2  -1  285.51   14.96
   8  -2  -5 1214.73   37.50
   8   2  -5 1196.94   39.08
   8   2  -5 1203.85   37.90
  -5   3  -6  135.77    8.77
   5   3   6  133.53    8.96
   5   3   6  134.06    9.37
   7   0   6 1068.09   37.92
   7   0   6  969.81   33.30
  -7   0  -6  985.12   31.11
   8  -1  -6   16.19    4.24
   8   1  -6   13.79    3.89
   8   1  -6   12.74    3.63
   9   1  -4  454.40   20.02
   9  -1  -4  474.90   19.26
   9  -1  -4  430.96   18.96
   9   1  -4  457.54   19.24
   3  -3  -8   10.57    3.90
  -3   3   8   10.95    3.24
   6   3   5  537.00   22.42
   6   3   5  472.63   20.45
  -6   3  -5  489.48   21.28
  -6   3  -5  499.11   19.44
  -7   3   5  297.52   13.09
   7   3  -5  337.36   15.90
   7  -3  -5  329.17   13.36
   7   3  -5  325.92   13.61
   3   0   9    0.87    2.38
   3   0   9    0.11    2.47
   3   5   3  202.84   10.92
   3   5   3  198.93   11.41
   1   2   9    6.75    3.20
   1   2   9    6.48    3.48
   1  -2   9    6.27    2.61
   1   2   9    8.03    3.38
   9   2   0  179.36   12.56
   9  -2   0  184.21   10.59
   9   2   0  177.75   12.22
   9  -2   0  186.05   10.79
  -4   4   6 1396.73   42.52
   4  -4  -6 1406.47   42.23
   4   4  -6 1355.33   45.67
   8  -3   1 1624.16   48.07
   8  -3   1 1684.28   49.13
   8   3   1 1637.66   51.86
   8   3   1 1721.79   54.65
   9  -2  -2   70.24    6.78
   9   2  -2   76.11    7.90
   9  -2  -2   67.67    6.78
   9   2  -2   65.26    7.62
   6   4  -4 1258.59   38.95
   6  -4  -4 1175.25   36.53
  -6   4   4 1202.22   38.02
   6   4  -4 1268.96   43.69
  -3   2   9 3627.07   94.36
  -3  -2   9 3748.03   98.28
   3  -2  -9 3716.96   97.80
  -1   4   7 2644.68   73.88
  -1   4   7 2642.78   71.12
   0   4   7  482.82   21.86
   0   4   7  423.75   17.67
   0   4   7  387.46   15.37
   3   4   6   67.98    6.39
   3   4   6   74.00    7.37
   2   5   4 3982.85  106.39
   2   5   4 3719.01   97.40
   8  -3  -3 2876.42   76.09
   8   3  -3 2651.31   76.60
   8   3  -3 2895.62   83.46
   5   0  -9    0.84    3.07
   6  -1   7  806.97   29.34
   6   1   7  888.03   29.94
   6   1   7  703.19   27.24
   6  -1   7  837.84   31.45
  -4   5  -2 7405.01  186.73
   4   5   2 7688.21  190.03
   4   5   2 8010.32   78.39
   5   0   8  469.73   19.05
   5   0   8  498.70   21.99
  -5   0  -8  479.41   19.15
   7  -1   6   76.74    8.68
   7   1   6   77.31    7.43
   7  -1   6   77.32    7.86
   7   1   6   84.48    8.51
   9   0   3   -1.93    3.54
   9   0   3    0.29    3.72
   6   4   3   20.81    4.90
  -6   4  -3   18.10    3.69
   6   4   3   21.86    5.01
   4   3   7  333.14   14.10
  -3   5   4 3770.39  120.16
   3   5  -4 3942.78  111.87
  -3   5   4 3891.78  100.38
   2   3   8  162.40   10.20
  -2   4   7    0.27    3.34
  -2   4   7    0.59    3.21
   7   4  -1 1799.08   56.57
   7   4  -1 1792.09   56.25
  -7   4   1 1856.23   52.86
   7  -4  -1 1714.10   49.62
   9  -2   1  554.35   22.63
   9   2   1  534.25   24.25
   9  -2   1  532.73   21.48
   3  -1   9 1114.90   35.45
   3   1   9 1045.62   33.36
   3   1   9 1169.10   37.65
  -4   5   3  492.72   21.97
   4  -5  -3  525.82   20.78
   4   5  -3  508.15   22.75
  -1   0  10  574.90   22.59
  -1   0  10  570.83   21.89
   7  -4   0   62.54    5.82
   7   4   0   67.16    8.00
   7   4   0   59.65    7.38
  -7   4   0   62.57    6.10
   4  -2   8 2355.06   65.48
   4   2   8 2573.21   70.96
   4   2   8 2576.20   69.09
   9  -2  -3  748.43   26.06
   9   2  -3  762.38   29.52
   9   2  -3  755.28   27.66
   8   0   5   -0.86    3.20
   8   0   5    2.23    3.49
   9   0  -5   -0.05    2.16
   9   0  -5    0.11    3.05
   7  -3   4  542.52   22.93
   7   3   4  485.49   21.02
   7   3   4  495.50   21.42
   7  -3   4  517.71   20.81
   1   4   7  316.96   14.40
   1   4   7  286.30   13.13
   0   0  10 1673.65   48.55
   0   0  10 1636.35   48.87
  -2   0  10 1871.90   54.56
  -2   0  10 1685.97   48.93
   7   4  -2   89.40    8.45
  -7   4   2   94.74    7.69
   7  -4  -2   84.23    6.97
   7   4  -2   87.69    8.88
  -5   1   9   64.61    6.36
   5  -1  -9   61.71    6.61
   5   1  -9   61.41    6.53
   0   5   5  329.75   14.12
   0   5   5  361.26   16.26
  -1   5   5  642.51   24.67
   8  -3   2  394.65   15.38
   8   3   2  422.45   21.32
   8  -3   2  374.67   14.57
   8   3   2  364.98   16.75
   2   2   9 1381.60   42.31
   2   2   9 1400.81   42.61
   8  -2   4  720.04   28.36
   8   2   4  753.14   29.68
   8  -2   4  747.21   27.91
   5   1   8  200.55   11.88
   5  -1   8  193.36   10.55
   5   1   8  190.36   10.18
   4   3  -8  108.48    8.13
   4  -3  -8  119.78    8.56
  -4   3   8  120.09    8.25
   9   1   3  286.89   15.42
   9   1   3  252.27   14.35
   9  -1   3  259.36   14.45
   9  -1   3  277.96   14.30
   5   5  -1  628.76   26.22
   5   5  -1  641.21   25.75
  -5   5   1  519.90   26.45
  -5   5   1  659.31   24.40
   5   5   0  616.46   26.34
   5   5   0  589.73   24.51
  -5   5   0  609.93   23.01
   7   4   1  308.48   17.01
   7   4   1  297.27   14.85
   7  -4   1  291.05   12.07
  -7   4  -1  302.04   12.70
   7  -2  -7   72.01    6.85
   7   2  -7   69.18    6.62
  -1  -1  10  405.80   15.65
  -1   1  10  408.46   15.78
  -1   1  10  424.92   18.20
  -1   1  10  440.84   19.46
  -4   2   9  146.49    9.09
   4   2  -9  150.56    9.63
   4  -2  -9  161.12    9.94
  10   0  -1   -0.85    3.55
  10   0  -1   -0.40    3.69
   8   1   5   32.89    5.50
   8  -1   5   38.74    6.32
   8  -1   5   34.71    6.28
   8   1   5   37.48    6.40
  -3   4   7  272.86   12.91
   9   1  -5  503.97   20.30
   9   1  -5  501.82   20.80
   9  -1  -5  533.50   20.84
   1   5   5   43.64    5.46
   1   5   5   46.66    6.12
  -2   5   5    0.09    2.80
  -2   5   5    0.50    2.39
   8  -3  -4   50.47    5.70
   8   3  -4   54.51    7.12
   8   3  -4   48.49    5.98
   0   1  10  250.97   13.59
   0   1  10  255.93   14.27
   0  -1  10  243.30   11.67
   0   1  10  249.04   13.92
  -2  -1  10    7.21    3.43
  -2  -1  10    8.20    2.82
  -2   1  10    8.62    3.39
  -2   1  10    8.25    3.97
   1   0  10  108.61    7.90
  -3   0  10  159.30    9.79
  -3   0  10  169.37    9.60
   7   0  -8 2615.00   80.95
  10   0  -2  211.52   11.64
   6   2  -8  110.22    8.20
  -6   2   8  113.79    8.23
   6  -2  -8  110.59    8.15
  10   0   0  256.01   15.30
  10   0   0  225.58   12.96
   3   5   4    5.92    3.70
   3   5   4    8.90    3.38
   5   5  -2    2.35    2.87
  -5   5   2    1.75    2.78
   5   5  -2    1.76    2.91
   9  -2   2  743.01   29.12
   9   2   2  763.23   32.09
   9  -2   2  765.43   30.58
   9   2   2  667.42   29.53
   5   5   1  223.47   12.63
   5   5   1  217.64   12.84
  -5   5  -1  219.35   10.89
   8   0  -7    2.79    2.86
   4   5   3  886.62   33.37
   4   5   3  961.37   35.29
   7  -4  -3  159.63    9.36
  -7   4   3  168.02    9.96
   7   4  -3  160.62   10.22
   7   4  -3  179.51   12.44
   5  -4  -6  532.61   22.09
   5   4  -6  526.80   21.87
  -5   4   6  509.01   21.72
   2   4   7   30.40    5.49
   2   4   7   25.29    4.25
   5   4   5  638.79   25.57
   5   4   5  620.12   25.74
   8   2  -6  394.51   18.66
   8  -2  -6  439.59   19.53
   8   2  -6  420.59   19.04
   9   2  -4 1322.78   46.79
   9   2  -4 1285.00   43.99
   9  -2  -4 1361.20   45.40
  -6   4   5 1897.09   60.55
   6   4  -5 2007.64   67.66
   6   4  -5 1860.41   58.84
   6  -4  -5 1892.39   60.31
   4   0   9    0.79    2.92
   4   0   9   -0.73    3.09
   6  -3  -7  314.68   15.61
   6   3  -7  311.49   15.56
  -4   5   4  272.56   14.53
   4   5  -4  294.77   17.63
   4  -5  -4  274.64   14.46
   7  -3  -6 3041.46   91.53
   7   3  -6 3068.08   93.79
  -7   3   6 2858.29   87.32
   7   3  -6 2988.65   91.24
   3   3   8   47.42    6.22
  10  -1  -1   87.37    7.52
  10   1  -1   83.96    8.52
  10  -1  -1   93.47    8.30
   4   4   6  354.40   17.44
   4   4   6  328.26   16.02
   1  -1  10    6.85    2.70
   1   1  10    7.41    3.27
   1   1  10    6.69    3.42
   1   1  10   10.65    3.87
   7   4   2  638.62   27.10
   7   4   2  705.53   30.35
  -3  -1  10 1580.34   52.38
  -3  -1  10 1653.59   53.24
  -3   1  10 1842.27   59.64
  -3   1  10 1523.06   50.09
   7   1  -8   67.26    6.80
  10   0  -3   -0.32    2.92
  10  -1  -2  825.38   31.29
  10  -1  -2  800.67   30.25
  10   1  -2  773.28   30.32
  10   1  -2  772.31   31.34
  10  -1   0  414.63   19.98
  10  -1   0  432.00   20.37
  10   0   1    0.67    3.77
  10   0   1    0.71    4.08
   6   4   4   67.48    6.99
   8   1  -7  351.44   17.01
   2   5   5  810.10   31.24
   2   5   5  866.99   33.01
   6   2   7  128.77    9.50
   6  -2   7  112.44    8.99
   6   2   7  129.76    8.84
  -3   5   5   23.75    4.60
  -3   5   5   23.31    4.79
   6   0  -9    0.12    2.99
   9   0   4  620.41   27.37
   9   0   4  691.06   29.74
  -1   3   9 1642.48   56.73
  -1   3   9 1728.19   55.84
   7   2   6   43.00    6.12
   7  -2   6   35.34    5.69
   7  -2   6   30.94    6.09
   7   2   6   39.13    6.17
   8  -3   3   11.22    4.05
   8  -3   3    9.57    3.56
   8   3   3   10.37    4.23
   5   5  -3   56.91    7.31
  -5   5   3   49.26    5.66
   5  -5  -3   51.46    5.77
   5   5   2  266.70   15.43
   5   5   2  252.98   14.66
   6   3   6 2477.67   77.82
   6   3   6 2426.52   75.93
   4   1   9  486.37   20.30
   4  -1   9  524.86   21.89
   4   1   9  506.59   22.92
   3   2   9  257.25   14.23
   3   2   9  260.85   13.87
   2   0  10   22.76    4.02
   0   3   9 1377.26   45.77
   0   3   9 1369.51   46.93
   4  -4  -7 1182.85   40.59
  -4   0  10    3.68    3.00
   4   0 -10    2.91    3.04
  -2   3   9  553.55   22.82
   9   0  -6  374.97   17.65
  -5   3   8   97.85    7.68
   5  -3  -8   77.48    6.75
   5   3  -8   89.65    7.38
   0   6   0   12.09    3.74
   5   3   7   46.01    6.03
  10   1  -3  192.12   11.68
  10   1  -3  185.06   10.90
  10  -1  -3  192.95   10.59
   7   4  -4   30.06    4.71
  -7   4   4   28.34    4.62
   7  -4  -4   31.16    4.78
   7   4  -4   30.64    5.77
  10   1   1  857.00   35.17
  10  -1   1  820.45   32.11
  10   1   1  825.05   33.61
  10  -1   1  876.24   33.84
  -5   2   9  187.94   10.20
   5  -2  -9  191.41   10.72
   5   2  -9  192.21   10.73
   7   0   7    1.01    3.60
   7   0   7   -0.02    3.07
   0   6   1  104.81    8.35
   0   6  -1  104.89    8.27
   1   6   0   53.65    6.32
  -1   6   0   50.38    5.87
   7   3   5  296.20   16.00
   7   3   5  323.50   17.21
   5   2   8   31.44    5.07
   5  -2   8   28.03    4.88
   5   2   8   25.29    4.94
   6  -1  -9  710.54   27.78
   6   1  -9  739.00   28.59
   9  -1   4   38.85    6.03
   9   1   4   51.98    7.56
   9  -1   4   48.82    6.52
   9   1   4   52.20    7.48
   9   3  -1    4.75    4.04
   9  -3  -1    5.10    2.91
   9   3  -1    4.34    3.77
   8  -3  -5 1629.10   53.16
   8   3  -5 1642.79   55.85
   8   3  -5 1635.94   53.37
   9   2   3 1152.44   43.54
   9  -2   3 1090.69   40.45
   9  -2   3 1032.86   37.72
   1   6  -1  473.41   21.52
  -1   2  10  197.04   11.88
  -1   2  10  184.10   11.10
  -1   2  10  175.85   10.16
   6   0   8  493.08   23.16
   6   0   8  646.61   25.74
   3   4   7    9.65    4.03
   3   4   7    7.68    3.45
   1   3   9 1185.14   41.81
   9   3   0  111.96    9.97
   9   3   0  108.55   10.06
   9  -3   0  112.87    8.13
   2  -1  10  558.68   22.63
   2   1  10  606.26   25.14
   2   1  10  584.78   23.52
  10   0  -4  234.12   11.89
   1   6   1  250.22   14.32
  -1   6  -1  272.84   15.60
   4   1 -10  558.61   23.65
  -4   1  10  583.02   23.41
   4  -1 -10  571.31   24.02
   9   3  -2   35.71    6.31
   9  -3  -2   37.51    5.11
   9   3  -2   38.71    6.20
  -1   5   6    0.19    2.67
  -1   5   6    0.38    2.70
   8  -2   5  206.43   12.54
   8   2   5  230.90   13.39
   8   2   5  230.31   12.70
   8  -2   5  232.19   12.72
   4   5   4  839.58   32.19
   4   5   4  902.30   33.16
  10   0   2  712.52   29.89
  10   0   2  680.52   29.29
   9  -2  -5    4.13    3.74
   9   2  -5    4.69    2.92
   9   2  -5    3.38    3.32
   0   5   6  159.05    9.82
   9   1  -6  559.75   23.20
   9  -1  -6  580.90   23.62
   9   1  -6  565.65   23.86
  -1   4   8  498.02   21.07
  -1   4   8  503.86   22.25
  -3   3   9  722.34   27.91
   0   2  10  166.83   10.33
   0   2  10  171.28   10.44
   0   2  10  166.86    9.74
   8   0   6  240.89   13.63
   8   0   6  273.21   15.79
  -2   2  10 1477.62   50.19
  -2   2  10 1401.35   46.77
   0   4   8   17.58    4.23
   0   4   8   15.61    3.87
   0   4   8   13.34    4.09
   7   4   3 1402.61   48.93
   7   4   3 1560.44   53.37
   7   1   7   36.44    5.31
   7  -1   7   32.30    5.46
   7   1   7   36.78    6.34
   7  -1   7   36.83    6.08
   6   5  -1   42.16    6.43
   6   5  -1   44.48    6.20
  -6   5   1   44.36    5.38
  -6   5   0  171.74    9.88
   6   5   0  170.02   11.14
   6   5   0  164.42   11.74
   0   6   2   96.27    8.46
   0   6   2   86.42    7.16
   0   6  -2   90.40    7.86
   3   5   5  135.15    9.67
   3   5   5  129.23    8.61
  -4   5   5    4.69    2.68
   4  -5  -5    4.53    3.15
   2   6   0  820.63   31.58
  -2   4   8  477.88   21.63
  -2   4   8  488.35   21.05
  -2   5   6  157.53    9.96
  -2   5   6  176.70   10.15
   5  -5  -4  536.98   22.24
  -5   5   4  571.07   23.66
   5   5  -4  593.44   27.29
   5   5   3  239.93   12.58
   5   5   3  246.53   14.30
   1   6  -2  995.70   36.55
  -1   6   2  943.88   34.31
   2   6  -1  913.57   34.20
   9   3   1  813.03   33.82
   9  -3   1  807.54   30.35
   9  -3   1  834.69   30.98
   9   3   1  839.78   34.75
   1   5   6  220.09   11.17
   8   4  -1 1275.47   47.49
  -8   4   1 1243.54   42.66
   8  -4  -1 1223.66   41.31
   8   4  -1 1258.54   45.88
   6   1   8  142.23   10.32
   6  -1   8  141.58    9.43
   6   1   8  133.02    8.83
  10   1  -4  238.94   12.51
  10   1  -4  244.05   11.91
  10  -1  -4  259.68   13.80
  10  -1  -4  233.80   12.14
   6   4  -6    0.38    1.96
  -6   4   6    0.76    2.68
   6  -4  -6   -0.03    2.95
   4   3   8  228.74   11.72
   1   6   2  591.08   24.68
   1   6   2  633.25   25.61
  -1   6  -2  689.91   28.30
  -6   5   2    9.65    3.39
   6   5  -2   10.03    3.82
   6   5  -2   11.39    4.29
   9   3  -3  580.24   26.29
   9  -3  -3  573.80   23.04
   9   3  -3  525.52   23.04
  10   2  -1 3133.23   97.68
  10  -2  -1 3160.07   95.51
  10   2  -1 3274.93   50.26
  10  -2  -1 3071.90  101.20
  10  -1   2  675.31   28.00
  10   1   2  679.46   29.38
  10  -1   2  706.27   29.40
  10   1   2  690.70   29.95
   2   6   1  112.65    8.64
   8  -4   0  558.14   22.28
   8   4   0  572.67   26.37
   8   4   0  588.53   26.87
  -8   4   0  603.27   24.48
   8   1   6  679.49   27.93
   8   1   6  708.57   30.38
   8  -1   6  705.62   29.76
   8  -1   6  710.17   30.23
   1   4   8  865.20   32.58
   1   4   8  941.40   35.45
   1   2  10  471.14   20.25
   1   2  10  488.27   21.63
   1   2  10  440.36   19.57
  -3   2  10   19.62    4.16
  -3   2  10   21.48    4.85
   6   5   1   82.83    7.93
   6   5   1   80.62    8.34
  -7   2   8   -0.84    2.22
   7   2  -8   -1.12    2.36
   3   0  10  179.74    9.62
   8   4  -2   13.60    4.78
   8  -4  -2   13.50    3.58
  10  -2  -2   46.32    5.76
  10  -2  -2   48.23    6.26
  10   2  -2   48.19    7.04
  10   2  -2   47.84    6.72
   5   0 -10 1386.27   47.09
  10   2   0  656.72   28.73
  10  -2   0  721.20   28.19
  10   2   0  662.54   28.78
  10  -2   0  674.53   26.78
   8  -2  -7  657.60   23.78
   8   2  -7  654.70   24.08
   8   2  -7  650.47   26.84
   5   0   9    0.42    2.99
   5   0   9   -0.07    2.94
   2   3   9  641.42   23.64
   2   3   9  705.97   25.98
   8   3   4 1028.65   35.59
   8  -3   4 1065.04   33.91
   8   3   4 1150.22   38.39
   8  -3   4 1057.39   35.37
  -5   4   7   20.20    4.41
   5  -4  -7   21.75    4.31
  -2   6   2  122.12    8.73
   2   6  -2  122.59    9.00
   5   4   6  179.18   10.81
   5   4   6  182.07   11.46
  -3   4   8   29.08    5.18
  -3   4   8   31.50    4.92
   6   4   5  143.24   10.25
   6   4   5  128.38    9.37
   7   3  -7  198.38   12.04
   7   3  -7  184.59   10.97
  -7   3   7  157.50    9.91
   7  -3  -7  183.80   10.87
   7  -4  -5    3.93    3.29
   7   4  -5    3.51    3.60
  -7   4   5    6.34    3.27
   7   4  -5    4.50    2.48
   4   2   9  666.78   24.02
   4   2   9  683.97   25.20
   8   0  -8  316.32   15.30
  -3   5   6  227.70   12.34
  -3   5   6  209.24   12.17
  -8   4  -1  134.30    8.55
   8   4   1  134.14   10.74
   8   4   1  138.25   10.74
   4   3  -9  155.91   10.30
  -4   3   9  172.49   10.54
   4  -3  -9  157.97   10.32
   2   6   2  188.56   11.69
   2   6   2  189.57   11.52
   9   0   5   -2.58    3.83
   9   0   5   -0.04    3.69
   0   6   3  288.23   15.30
   0   6   3  278.31   13.83
  10   0  -5    0.17    2.67
  10   0  -5    1.02    3.20
   6   5  -3   -0.49    3.48
  -6   5   3    1.47    2.85
   2   5   6   37.01    5.08
   3   1  10  425.32   18.63
   3  -1  10  401.66   16.84
   3   1  10  408.13   16.94
  10   2  -3   34.13    6.19
  10  -2  -3   32.89    4.92
  10   2  -3   35.53    5.54
  -1   6   3  604.86   22.72
  -5   1  10 1898.35   52.42
   5  -1 -10 1913.34   54.12
   5   1 -10 1819.62   61.67
  10   0   3    0.85    3.58
  10   0   3   -0.59    3.04
   6   3  -8 1331.59   40.28
  -6   3   8 1365.77   40.36
   6  -3  -8 1415.52   41.67
  10  -2   1  482.01   19.99
  10  -2   1  550.05   22.02
  10   2   1  532.89   23.74
   7   0  -9    0.56    2.90
   3   6  -1    9.15    3.49
   9  -3   2  249.18   13.43
   9  -3   2  237.57   12.77
   9   3   2  254.98   15.87
   9   3   2  201.91   13.42
   8   4  -3  737.09   26.96
   8  -4  -3  723.00   24.97
  -8   4   3  768.73   26.88
   5   1   9  482.27   19.33
   5   1   9  505.88   21.55
   5  -1   9  455.63   18.69
  -6   2   9   10.41    3.78
   6  -2  -9    8.83    3.54
   9  -2   4   13.01    4.29
   9   2   4   13.08    5.32
   9  -2   4   12.38    4.76
   6   5   2    8.48    4.21
   8  -3  -6  267.57   13.66
   8   3  -6  268.66   14.52
  -8   3   6  262.75   13.54
  -1   0  11   -1.14    2.57
   9   3  -4  670.76   25.41
   9  -3  -4  710.36   24.82
   9   3  -4  711.26   27.89
   1   6   3 1971.29   54.34
   1   6   3 1951.22   55.32
   4   4   7   37.32    5.62
   4   4   7   29.82    4.49
   2   4   8  405.12   18.25
   2   4   8  394.17   17.69
   9   0  -7    0.45    2.33
   3   6   1   88.45    7.82
   8   1  -8  211.89   12.15
   2   2  10 1005.91   34.99
   2   2  10 1040.45   33.02
   4   2 -10  398.60   17.97
  -4   2  10  419.69   17.45
  -2   0  11    0.09    2.85
  -2   0  11    0.84    2.53
   9   2  -6  511.42   20.22
   9  -2  -6  528.66   20.59
   9   2  -6  492.60   20.42
   0   0  11   -0.25    2.54
   7   4   4   -0.00    3.48
  -2   6   3    3.00    2.69
   9  -1   5   15.89    5.32
   9   1   5   16.79    5.03
   9  -1   5   16.55    4.76
   9   1   5   16.96    5.00
   3   6  -2  407.37   19.07
  -3   6   2  360.08   16.91
  10  -1  -5   33.60    4.70
  10   1  -5   27.15    5.13
  10   1  -5   39.53    5.44
   4   5   5   11.65    4.46
   4   5   5   10.85    3.36
   5  -5  -5  179.82   10.78
  -5   5   5  205.58   11.93
  10   1   3   68.44    8.11
  10   1   3   82.00    8.91
  10  -1   3   59.99    7.45
  10  -1   3   58.69    7.05
   5   5   4  391.51   17.62
   5   5   4  442.22   19.05
   7  -1  -9   11.07    3.79
   7   1  -9   13.92    3.91
   7   2   7   93.22    8.19
   7  -2   7  126.86    9.99
   7   2   7  113.64    8.54
   8   4   2  374.95   19.52
   8   4   2  347.80   17.86
   6   3   7 1146.75   36.90
   4  -4  -8   64.01    6.47
   7   3   6   81.11    7.61
   7   3   6   79.61    7.72
  -1   1  11  213.19   12.75
  -1   1  11  206.49   11.79
  -1  -1  11  206.51   11.84
   9   1  -7    6.35    3.32
   3   3   9   71.36    7.06
   3   3   9   69.15    6.85
   6   2   8   51.38    6.50
   4  -5  -6   29.87    4.75
  -4   5   6   24.73    4.55
  10   2  -4  695.64   26.59
  10  -2  -4  687.39   24.42
  10   2  -4  685.83   24.97
   2   6   3 1708.82   48.96
   2   6   3 1631.14   47.88
  -3   0  11    1.03    2.94
  -3   0  11   -0.37    2.68
  -2   1  11  101.71    8.16
  -2  -1  11  107.40    8.21
  -2   1  11   97.44    7.65
   3   6   2   -0.28    2.35
   3   6   2    0.22    3.04
  10   2   2  126.03   10.99
  10  -2   2  134.04    9.34
  10   2   2  150.92   11.55
  10  -2   2  129.49    9.58
   0   1  11   11.11    3.73
   0  -1  11   11.08    3.26
   0   1  11   10.87    3.31
  11   0  -1    0.77    3.57
  11   0  -1    2.34    3.89
   6   5  -4   44.13    6.69
  -6   5   4   41.35    5.31
   6  -5  -4   38.18    5.05
  -8   4   4  223.89   12.36
   8   4  -4  227.19   12.50
   8  -4  -4  230.71   12.26
   8   2   6    1.02    3.89
   8  -2   6   -1.19    3.59
   8   2   6   -0.68    3.90
   1   0  11   -0.12    2.55
  -1   5   7  819.41   28.85
  -1   5   7  801.23   28.21
   4   0  10   52.40    5.69
   0   5   7    1.09    3.49
   0   5   7    0.29    2.85
  11   0  -2   34.62    5.37
   3   5   6 1084.25   33.90
   5  -3  -9  249.88   13.31
   5   3  -9  244.06   12.93
   6   0 -10  547.44   21.56
   0   6   4   96.06    7.51
   0   6   4  100.78    8.82
  11   0   0  214.18   13.16
  11   0   0  226.61   13.58
  -1   6   4    2.99    3.23
  -1   6   4    6.17    2.79
   5   3   8   69.90    6.75
  -3   6   3   70.84    6.90
   9  -3   3  304.28   14.62
   9   3   3  311.83   17.73
   9  -3   3  334.44   16.20
   4   6   0 1038.22   34.43
   6   5   3   56.66    6.89
   6   5   3   57.79    6.72
   4   6  -1  427.84   19.73
  -2   5   7   -0.14    2.84
  -2   5   7   -0.00    2.92
   7   5  -1    2.75    3.47
   7   5  -1    2.17    3.68
  -7   5   1    1.68    2.71
  -6   4   7 1221.58   37.61
   6  -4  -7 1269.72   38.18
   7   0   8 1714.81   52.41
   7   0   8 1559.65   46.06
  -1   3  10    4.81    4.00
  -1   3  10    4.44    3.32
  -1   3  10    5.33    3.69
  -7   5   0  249.70   14.16
   7   5   0  297.30   16.31
   7   5   0  290.79   16.48
  -3   1  11   85.59    7.66
  -3  -1  11   89.85    7.61
  -3   1  11   80.61    6.72
  -7   4   6  151.79    9.79
   7  -4  -6  155.88    9.91
   7   4  -6  163.96   10.00
   3   4   8   99.85    7.67
   3   4   8  107.34    8.69
   8   0   7    0.16    3.57
   8   0   7    0.85    3.27
   8   3   5   24.57    5.20
   8   3   5   22.43    5.20
   9   3  -5   37.88    5.05
   9  -3  -5   36.82    5.43
   9   3  -5   40.89    5.88
   1   6   4  731.03   26.87
   1   6   4  707.52   24.89
  11   1  -1  315.39   16.67
  11  -1  -1  350.23   16.47
  10   0  -6   18.14    4.36
   1   5   7   -0.62    3.59
   1   5   7    1.47    2.58
   0   3  10 1971.72   56.08
   0   3  10 1935.67   56.17
   0   3  10 1753.91   50.33
   1   1  11  209.77   11.61
   1  -1  11  220.94   11.75
  -2   3  10   17.11    4.43
  -2   3  10   13.52    4.26
   4   6   1   93.54    8.12
  11   0  -3   -0.10    3.03
   3   2  10  135.17    9.28
   3   2  10  132.23    8.60
  -2   6   4   16.89    4.04
   7   5  -2  395.00   18.60
  -7   5   2  381.79   16.79
   7   5  -2  416.37   20.72
  -5   2  10    1.98    3.03
   5   2 -10    1.57    2.69
  10   0   4 1964.99   59.36
  10   0   4 2025.98   40.05
   4   1  10  192.10   10.85
   4  -1  10  186.59   10.77
   4   1  10  206.66   12.88
  11   1  -2  161.38   10.86
  11   1  -2  168.07   11.64
  11  -1  -2  179.69   11.01
  11  -1  -2  174.05   11.21
   6   1 -10  444.94   18.80
   6  -1 -10  445.83   18.88
  -6   1  10  478.95   19.15
  -4   6   2    6.36    2.77
   4   6  -2    9.61    3.77
   5   2   9  309.23   14.42
   5   2   9  301.05   18.19
  11  -1   0   38.89    5.75
  11  -1   0   37.85    5.98
  -4   0  11    0.68    2.77
  -4   0  11    2.58    2.78
  11   0   1    1.83    4.40
  11   0   1    2.82    3.98
  -1   4   9    5.35    3.82
  -1   4   9    6.86    3.85
  -1   4   9    6.82    3.65
   8   4   3  194.93   12.63
   8   4   3  209.37   13.55
   7   5   1    1.64    3.93
   7   5   1    5.89    3.88
   6   4   6  516.78   20.68
   6   4   6  593.98   23.82
   7   1   8  189.50   12.84
   7  -1   8  184.93   11.91
   7   1   8  165.65   10.66
   8   2  -8   88.21    7.53
   8  -2  -8   84.12    7.54
   3   6   3  497.85   20.21
   3   6   3  469.98   20.04
   6   0   9    0.12    2.84
   0   4   9    0.52    4.15
   0   4   9    1.96    3.17
   0   4   9    1.56    3.12
   2   0  11   -0.12    2.51
   8   1   7   38.19    6.60
   8   1   7   37.44    5.70
   8  -1   7   43.00    6.73
   8  -1   7   41.49    6.40
  10   3  -1   18.72    4.81
  10   3  -1   26.21    5.90
  10  -3  -1   21.53    4.40
  -3   5   7  421.65   17.76
  -3   5   7  405.60   18.20
  -2   4   9    5.49    3.59
  -2   4   9    1.43    3.39
   5  -4  -8  171.07   10.70
   9  -2   5    1.17    3.84
   9  -2   5   -1.33    2.69
   9   2   5    0.74    3.94
   9   2   5   -0.33    3.75
  10  -1  -6  275.05   13.73
  10   1  -6  268.73   13.52
  10   1  -6  268.00   14.02
   1   3  10 1129.74   35.29
   1   3  10 1096.88   35.56
  10   2  -5 1984.74   54.90
  10  -2  -5 2012.75   54.76
  10   2  -5 2079.92   36.64
  -3   3  10  154.73   10.11
  -3   3  10  148.30    9.74
   7  -3  -8  250.60   13.08
   7   3  -8  234.02   12.46
  11   1  -3  195.37   11.74
  11   1  -3  189.04   11.93
  11  -1  -3  197.96   11.43
   5   4   7 1050.83   56.05
   5   4   7 1144.39   60.88
  10   3  -2  100.95    9.44
  10  -3  -2   94.18    7.38
  10   3  -2  100.80    8.69
  10   1   4  510.45   31.75
  10  -1   4  460.86   28.79
  10   1   4  424.13   27.20
  10  -1   4  466.10   29.12
  10  -2   3  258.72   17.72
  10  -2   3  244.94   17.58
  10   2   3  257.64   19.03
  10  -3   0   39.31    5.13
  10   3   0   41.27    6.73
  10   3   0   42.68    6.97
   2   6   4 1756.79   90.26
   2   6   4 1653.17   85.58
   7  -2  -9    8.24    3.35
   7   2  -9    8.21    3.20
  -7   2   9    8.62    3.18
   9   0   6   22.00    5.13
   9   0   6   22.52    5.43
  -8   3   7   -0.39    3.18
   8   3  -7    0.02    2.65
   8  -3  -7   -0.11    3.21
   8   3  -7   -0.96    2.77
   7   5  -3    0.92    3.40
  -7   5   3   -0.29    2.63
   4   6   2  359.59   22.87
   4   6   2  377.67   24.22
   7   4   5  903.44   50.08
   7   4   5  925.22   51.17
  -5   5   6  694.58   38.79
   5  -5  -6  661.42   36.87
  -9   4   1   71.22    6.69
   9   4  -1   66.48    7.75
   9  -4  -1   70.58    6.37
   9   4  -1   71.36    8.20
  -4  -1  11  147.29   10.28
  -4   1  11  155.31   12.23
  -4   1  11  145.70    8.75
   8   4  -5  153.14   13.25
  -8   4   5  135.18    8.91
   8  -4  -5  151.49   11.81
   8   4  -5  141.73    8.83
  11  -1   1  264.34   18.32
  11   1   1  257.97   19.13
  11  -1   1  240.66   17.37
  11   1   1  264.62   19.15
   2   5   7    4.42    4.28
   2   5   7    5.28    3.32
   5   5   5   75.58    7.56
   5   5   5   81.53    7.33
  -1   2  11   94.09    8.27
  -1   2  11   94.18    7.83
  -1   2  11   91.58    7.48
   6  -5  -5  318.03   20.05
  -6   5   5  326.22   20.91
  -3   6   4   13.63    3.66
  -3   6   4   15.70    3.90
   9  -2  -7  583.44   33.39
   9   2  -7  535.77   31.47
   9   2  -7  567.02   32.59
   4   3   9  545.90   31.83
   4   3   9  530.65   30.65
  -4   6   3  192.73   14.26
  -4   6   3  192.01   13.84
  11   0  -4  974.75   52.60
   6  -1   9   97.67    8.05
   6   1   9   93.47    7.56
   6   1   9   95.37    8.60
   1   4   9  640.61   36.80
   1   4   9  573.51   33.08
   9   4   0   56.91    7.58
   9   4   0   62.46    8.01
  -9   4   0   65.60    6.34
   8   0  -9   -0.34    3.23
   2   1  11    4.13    3.30
   2  -1  11    3.96    2.66
   9   4  -2   82.08    7.85
   9  -4  -2   88.23    7.12
  -9   4   2   90.84    7.55
   9   4  -2   93.75    9.24
  -2   2  11 1173.48   61.75
  -2   2  11 1116.75   59.66
  -2   2  11 1086.55   57.94
   9   0  -8   25.27    4.70
   0   2  11   28.34    4.65
   0   2  11   26.04    4.91
   0   2  11   23.90    4.64
  -3   4   9   27.36    5.20
  -3   4   9   28.70    4.99
   4   5   6  870.71   47.14
   7   5   2  259.19   18.92
   7   5   2  260.74   18.43
  10  -3  -3  149.10   10.09
  10   3  -3  145.24    9.85
  10   3  -3  148.10   11.90
  11   0   2  481.93   29.57
  11   0   2  558.75   33.70
  10  -3   1    0.60    3.28
  10   3   1   -0.25    3.86
  10  -3   1    1.03    3.14
  10   3   1    1.89    3.97
   9   1   6  741.51   42.47
   9  -1   6  766.15   43.67
   9  -1   6  680.11   39.87
   9   1   6  817.91   47.21
   6   5   4    6.68    3.60
   6   5   4    4.31    2.98
   0   6   5  121.07    9.17
   0   6   5  114.89    8.25
  -1   6   5  254.75   17.21
  -1   6   5  248.12   17.37
   6   3  -9 2042.25  105.33
  -6   3   9 2266.88   79.38
   6  -3  -9 2264.73   78.22
   9   3   4   59.55    7.07
   9  -3   4   59.89    6.35
   9   3   4   62.78    7.53
   5   6  -1  508.58   30.77
  -5   6   1  490.07   28.66
   5   6   0 1437.39   75.79
   9   4   1  174.89   14.51
   9   4   1  182.45   15.20
  11   1  -4  170.72   13.32
  11   1  -4  167.49   12.97
  11  -1  -4  167.96   13.18
  11  -1  -4  180.96   13.45
   2   3  10  152.95   12.03
   2   3  10  149.47   12.09
   8  -1  -9  145.65    9.47
   8   1  -9  146.89   10.49
  -5   0  11    0.12    2.65
   5   0 -11    0.99    3.37
  -4   5   7  193.41   14.18
  -4   5   7  198.06   14.45
   4   4   8  669.14   37.75
   4   4   8  630.03   35.43
  -4   3  10   81.94    7.21
  -4   3  10   77.87    7.35
  -3   2  11  443.94   26.27
  -3   2  11  468.66   27.91
  -9   4   3    4.60    3.14
   9   4  -3    3.83    4.46
   9  -4  -3    4.30    2.89
   9   4  -3    6.05    3.63
   9   3  -6    3.74    3.14
   9  -3  -6    4.42    3.62
   9   3  -6    4.90    3.35
   5   0  10  364.00   22.28
   9   1  -8  700.53   39.28
  11   2  -1  126.60   10.04
  11  -2  -1  122.12    8.77
  11  -2  -1  122.11    8.54
  11   2  -1  122.69   10.14
   1   6   5    4.13    3.76
   1   6   5    2.36    2.59
  -2   6   5  129.05    8.88
   7   0 -10  764.84   42.45
   1   2  11  450.07   27.14
   1   2  11  440.49   26.51
   1   2  11  498.09   28.85
   7  -5  -4    1.84    2.94
  -7   5   4    3.59    3.00
  11   1   2  382.57   25.33
  11   1   2  398.97   26.18
  11  -1   2  385.53   24.74
  11  -1   2  377.34   24.13
   4   2  10   -0.00    3.01
   4   2  10   -0.18    3.19
  11   2  -2   86.23    7.88
  11  -2  -2   79.21    7.38
  11   2  -2   91.35    8.95
  11  -2  -2   75.37    6.57
   3   6   4  209.65   14.85
   3   6   4  193.93   14.64
  -5   6   2  280.54   18.20
   5   6  -2  291.15   20.46
   5   6   1  382.38   24.57
   7   3   7   14.27    4.51
   3   0  11   -0.92    2.34
  -6   2  10  439.36   26.21
   6   2 -10  446.85   26.75
   4   6   3  802.02   44.52
   4   6   3  756.74   42.30
   2   4   9  236.34   16.33
   2   4   9  233.77   16.46
   8   4   4  108.99    9.37
  11   2   0 1049.31   57.77
  11   2   0 1090.87   60.20
  11  -2   0 1013.86   54.07
  11  -2   0 1074.79   57.43
  10   0  -7   -1.62    3.23
   7  -4  -7 1673.50   85.83
  -7   4   7 1643.52   84.46
   7   2   8   12.05    4.12
   7   2   8   11.10    4.07
   6   3   8   47.39    6.29
   3   5   7   95.72    8.48
   3   5   7   76.95    6.87
  -4   6   4   12.32    3.75
  -4   6   4   10.97    3.64
   5  -1 -11 1002.66   53.93
  -5   1  11  968.49   51.75
   5   1 -11 1011.51   54.38
  10   3  -4   74.03    7.94
  10   3  -4   61.69    6.59
  10  -3  -4   62.61    6.08
  -4   4   9  169.52   12.81
  -4   4   9  162.72   12.71
  10   0   5   -1.84    4.08
  10   0   5    0.63    4.58
   8   2   7   51.00    6.39
   8  -2   7   46.15    6.61
   8   2   7   39.57    5.95
  10  -3   2  121.38    8.43
  10  -3   2  130.39    8.92
  10   3   2  124.61   10.50
  10   3   2  116.86   10.11
  11   0  -5   -0.90    3.18
  11   0  -5    0.37    3.14
   5   1  10  605.06   35.63
   5   1  10  574.25   32.74
   5  -1  10  605.38   34.16
  -1   5   8   20.08    4.69
  -1   5   8   18.78    4.48
  -1   5   8   15.48    4.30
  10  -2  -6  266.11   17.75
  10   2  -6  251.07   17.30
  10   2  -6  252.10   16.99
   8   3   6   40.16    6.06
   8   3   6   44.00    6.49
   7   1 -10  357.30   22.57
   7  -1 -10  367.02   22.99
  11   2  -3  444.21   26.92
  11  -2  -3  466.07   27.32
  11   2  -3  452.70   28.26
   0   5   8    9.71    3.69
   0   5   8   10.62    4.01
   7   5   3    3.25    3.54
   7   5   3    3.70    3.54
  10  -2   4  828.74   46.15
  10  -2   4  832.51   46.84
  10   2   4  878.86   49.77
  -6   4   8  117.77    8.43
   6  -4  -8  111.50    7.94
   9   4   2   85.89    8.79
   9   4   2   85.57    9.06
   3   1  11    2.19    3.04
   3  -1  11    0.29    2.16
   2   6   5  195.15   13.90
   2   6   5  194.27   14.60
  -3   6   5  106.13    8.22
  -3   6   5  109.24    8.33
  -2   5   8   38.65    5.56
  -4   2  11  811.11   44.58
  -4   2  11  870.88   46.89
  11  -2   1 1047.45   55.93
  11  -2   1 1071.62   57.46
  11   2   1  977.78   54.29
   8  -4  -6   89.60    7.38
  -8   4   6   89.26    7.64
  -5   6   3   75.05    6.75
   9   4  -4  632.93   37.65
   9   4  -4  609.68   34.65
   9  -4  -4  600.85   33.88
  -9   4   4  611.75   34.66
  11   0   3    0.87    4.51
  11   0   3    2.25    4.26
   5   6   2   94.91    8.43
   5   6   2  100.56    8.65
  10   1  -7  123.44    8.60
   8   5  -1  893.35   50.66
   8   5  -1  849.20   47.82
  -8   5   1  678.06   48.02
   6   2   9  154.92   12.05
   6   2   9  156.72   12.90
   6  -5  -6   67.07    6.29
  -6   5   6   70.77    6.76
   2   2  11  232.57   15.95
   2   2  11  221.14   15.80
  10  -1   5  114.05    9.67
  10   1   5  118.29   10.23
  10  -1   5  128.54    9.92
  10   1   5  101.52    9.21
  11   1  -5 1132.83   60.34
  11  -1  -5 1160.51   60.97
  11   1  -5 1118.31   59.29
   8   5   0  820.58   46.76
   8   5   0  798.01   45.63
   1   5   8    7.43    4.18
   1   5   8    6.65    3.49
  -1   0  12   99.45    7.96
   3   3  10   18.40    4.49
   3   3  10   19.58    4.71
   8   5  -2  181.64   15.20
   8   5  -2  176.69   13.86
  -8   5   2  174.71   12.97
   5  -3 -10  441.57   26.53
  -5   3  10  463.96   27.22
   9   2   6  302.06   21.08
   9  -2   6  286.57   20.13
   9   2   6  256.54   18.09
  -2   0  12  302.90   19.71
   5   3   9  549.11   31.98
   5   3   9  536.19   30.89
   8   0   8  431.99   26.73
   8   0   8  497.74   31.17
   6   4   7  241.23   16.53
   6   4   7  296.13   19.98
   5  -5  -7   62.60    6.36
  -5   5   7   62.99    6.52
   5   5   6   40.44    5.49
   7   4   6    8.10    4.14
   7   4   6    4.82    3.85
   0   0  12 1613.75   82.96
  11   1   3   10.19    5.21
  11  -1   3   10.29    4.46
  11   1   3    9.25    4.28
  11  -1   3   12.16    4.67
  -3   5   8   15.15    4.45
   6   5   5  105.23    8.30
   6   5   5   89.01    8.00
   7  -5  -5    7.00    3.32
  -7   5   5   10.34    3.50
   3   4   9  946.71   51.42
   3   4   9  896.39   48.49
  11   2  -4  700.93   39.99
  11   2  -4  717.46   39.98
  11  -2  -4  717.59   39.52
  -8   3   8  109.30    8.24
   8   3  -8  140.00    9.00
   8  -3  -8  141.95    9.12
   8  -2  -9    0.80    3.38
  -8   2   9    0.75    3.22
   8   2  -9    2.97    3.27
   7   0   9   -0.06    3.31
   8   5   1   27.01    5.86
   8   5   1   29.18    5.93
  -6   0  11   -0.23    3.06
   6   0 -11    0.99    3.28
  -1   6   6  116.43   10.06
  -1   6   6  114.57    9.08
   4   6   4   29.83    4.93
   4   6   4   28.01    5.50
   0   6   6  741.36   30.50
   0   6   6  752.61   32.27
   9  -2  -8 1108.72   42.40
   9   2  -8 1079.36   41.46
   9   3   5  109.87   10.03
   9   3   5  132.14   11.15
  10   3  -5  166.87   12.16
  10  -3  -5  161.06   10.84
  10   3  -5  152.43   10.45
  -1   1  12    6.95    3.85
   9   0   7   -2.55    3.62
   9   0   7   -1.11    3.75
  -3   0  12    2.27    2.90
  11   2   2   78.61    9.38
  11  -2   2   78.97    8.17
  11   2   2   78.70    8.93
  11  -2   2   80.57    7.88
  10  -3   3    1.52    2.89
  10   3   3    2.05    4.35
  10  -3   3    0.57    2.74
   7  -3  -9   70.82    7.32
   7   3  -9   71.77    7.05
  -7   3   9   80.80    7.58
  -8   5   3  925.20   36.55
   8   5  -3  957.68   40.66
  -5   4   9   46.77    5.98
   5  -4  -9   44.32    5.70
   6   6  -1   55.55    7.26
  -2   1  12  925.21   36.36
  -2   1  12  892.69   35.65
   6   6   0 1544.61   58.26
   8   1   8 1299.33   48.76
   8  -1   8 1253.91   48.31
   8   1   8 1369.92   53.78
   3   6   5  493.02   23.17
   3   6   5  497.11   22.40
   4   0  11    1.34    2.92
   5   4   8    4.38    3.61
   5   4   8    4.84    3.68
  -4   6   5   30.41    5.00
  -4   6   5   24.78    4.69
  -2   6   6   21.26    4.43
   9   4   3    2.59    3.90
   9   4   3    3.62    4.37
  -5   6   4  159.21   10.83
   0   1  12    8.88    3.78
  -1   3  11   -0.19    2.87
  -1   3  11    1.27    3.99
  -1   3  11    0.09    3.16
   4   5   7  225.55   13.84
   4   5   7  214.29   12.73
   5   6   3    7.69    3.94
   5   6   3    8.37    3.63
   2   5   8  791.66   33.13
   2   5   8  684.85   28.74
   9   3  -7  115.37    8.87
  -9   3   7  113.88    8.99
   9  -3  -7  121.66    9.19
   1   6   6  118.84    9.81
   1   6   6  115.24    8.85
   1   0  12  105.35    8.47
  -1   4  10  483.53   23.22
  -1   4  10  454.02   21.63
  -1   4  10  412.88   19.42
  12   0  -1   -0.93    3.97
  12   0  -1   -1.76    4.04
   7  -1   9  566.80   25.63
   7   1   9  463.92   23.28
   7   1   9  548.36   24.46
   5   2 -11  435.77   20.71
  -5   2  11  416.69   19.81
  -6   1  11  660.56   27.45
   6  -1 -11  646.16   27.70
   6   1 -11  681.29   28.93
  11   0  -6   72.22    7.18
  -2   3  11  657.60   28.51
  -2   3  11  681.22   29.03
  -2   3  11  642.92   27.19
   6   6  -2  502.02   25.08
  -6   6   2  492.54   22.09
   8   4   5  224.89   14.48
   8   4   5  248.24   15.37
  -9   4   5   33.34    5.05
   9   4  -5   32.49    4.81
   9  -4  -5   31.97    5.05
   9   4  -5   33.50    5.86
  12   0  -2  395.18   19.43
   9   0  -9   -0.44    3.27
   5   2  10   46.27    6.56
   5   2  10   48.16    5.68
   0   3  11  433.47   20.94
   0   3  11  444.58   21.57
   0   3  11  436.89   20.40
   7   5   4   22.25    5.00
   7   5   4   24.46    5.42
   0   4  10   36.90    5.65
   0   4  10   38.45    5.19
   0   4  10   33.81    5.32
   7   2 -10  238.58   13.85
  -7   2  10  256.84   14.04
  -2   4  10   55.59    6.42
  -2   4  10   54.78    6.76
   0   7   0   -0.32    2.18
   6   6   1 1728.07   63.50
   9   1   7  971.00   39.72
   9  -1   7 1076.82   43.88
   9   1   7 1083.56   44.58
  -3   1  12   39.23    5.84
  -3   1  12   42.16    5.54
  12   0   0  977.33   39.26
  12   0   0  993.48   40.07
   3   2  11 1716.04   61.87
   3   2  11 1802.34   63.38
   8   5   2  428.01   22.18
   8   5   2  479.75   24.82
   0   7   1  390.93   19.70
   6   0  10 2389.48   82.57
  -1   7   0  433.59   21.12
   1   7   0  440.32   21.34
   4   1  11  102.23    8.27
  -4   5   8 1154.51   44.63
  -4   5   8 1225.00   45.99
   8   0 -10  104.96    8.93
  10  -2  -7  736.25   30.50
  10   2  -7  703.23   29.90
  10   2  -7  690.46   28.95
  11   0   4   10.64    4.80
  11   0   4   15.61    5.63
  -1   7   1  497.53   23.85
   1   1  12   46.68    5.82
  12  -1  -1   85.84    8.19
  12  -1  -1   91.34    8.46
  12   1  -1   84.76    8.79
  -4   0  12  113.11    8.60
  -4   0  12  128.41    9.59
  12   0  -3   -0.27    3.45
  -3   6   6  534.71   23.89
  -3   6   6  525.57   24.01
  11   1  -6  167.80   11.38
  11  -1  -6  165.04   10.81
  11   1  -6  170.84   11.16
   1   7   1  321.04   17.36
  -3   3  11   38.72    5.36
  -3   3  11   45.68    6.40
  10  -2   5  127.78   10.18
  10   2   5  128.17   11.67
  10  -2   5  129.81   11.17
  10   2   5  138.15   11.97
  10   4  -1  654.44   30.61
  10   4  -1  624.20   28.51
  10  -4  -1  607.21   25.56
 -10   4   1  492.18   28.84
  10   0  -8   10.73    3.74
  11  -2  -5  178.62   11.23
  11   2  -5  182.15   12.42
  11   2  -5  163.18   10.92
  12   1  -2  351.67   18.38
  12  -1  -2  376.37   18.45
  12   1  -2  353.71   18.82
  12  -1  -2  346.26   17.98
   9  -1  -9  143.71   10.25
   9   1  -9  156.71   10.84
  11   3  -1   -1.22    4.25
  11   3  -1    0.26    4.04
  11  -3  -1    3.99    3.22
  -8   5   4   43.13    5.68
   1   3  11  179.18   11.89
   1   3  11  191.59   12.71
   1   4  10  161.17   10.99
   1   4  10  170.77   11.91
  -3   4  10   68.05    7.33
  -3   4  10   72.40    7.21
  -6   6   3  207.53   12.48
   2   6   6  333.46   17.98
   2   6   6  325.12   16.47
  -7   4   8   32.50    5.12
   7  -4  -8   32.52    5.18
  10   0   6   73.38    8.40
  10   0   6   80.37    9.02
  10   4  -2 1393.35   54.26
 -10   4   2 1472.37   53.72
  10  -4  -2 1383.28   50.71
  10   4  -2 1390.43   52.28
   4   3  10    5.74    3.06
   4   3  10    7.01    3.55
  10   4   0   82.22    9.34
  10   4   0   77.78    9.01
  11  -3  -2  236.00   13.31
  11   3  -2  227.26   14.24
  11   3  -2  227.58   15.10
  12  -1   0  368.07   18.79
  12  -1   0  336.43   17.71
  -6   3  10   88.44    7.81
   6  -3 -10   92.14    8.34
   8  -4  -7 1575.37   56.86
  -8   4   7 1522.15   55.57
   0   7   2  768.97   31.95
  12   0   1   -0.22    4.31
  12   0   1   -0.01    4.14
  11   3   0  190.07   13.83
  11   3   0  180.88   13.29
  11  -3   0  192.26   11.83
   6   1  10   17.88    4.20
   6  -1  10   18.37    4.36
  -2   7   0  224.92   13.67
   2   7   0  237.99   14.20
   6   6   2  319.20   17.80
   8   1 -10  113.65    9.08
   8  -1 -10  108.60    8.85
   2   0  12  123.44    9.09
  -1   7   2   59.31    7.24
  11   2   3   -1.53    3.62
  11  -2   3    2.16    3.56
  11  -2   3    1.02    4.34
  -2   7   1   10.18    3.60
  11   1   4   40.81    7.13
  11   1   4   35.77    6.57
  11  -1   4   36.44    6.67
  11  -1   4   35.97    5.99
   4   4   9   12.58    4.67
   4   4   9   12.15    4.17
  -6   5   7    2.80    3.32
   6  -5  -7    2.65    2.92
   7   3   8  216.08   14.05
  -4   1  12  956.97   36.65
  -4   1  12 1027.20   39.89
  12   1  -3  202.82   13.28
  12  -1  -3  214.30   12.84
  12   1  -3  204.32   12.91
  -7   5   6  128.47    9.54
   7  -5  -6  133.47    9.60
   1   7   2   78.92    7.88
   3   5   8  846.00   34.65
   3   5   8  782.32   31.55
   8   3   7  344.94   18.76
   2   7   1   24.72    4.86
  10   1  -8   94.86    8.42
  10   3  -6   62.31    6.96
  10  -3  -6   64.69    6.90
  10   3  -6   62.80    6.53
  -1   2  12   55.44    6.80
  -1   2  12   62.94    6.69
   4   6   5   21.81    4.39
   4   6   5   20.92    4.84
  11  -3  -3  740.27   30.17
  11   3  -3  758.97   31.79
  11   3  -3  783.11   34.17
  10  -1   6   -0.26    3.79
  10  -1   6   -0.70    3.87
  10   1   6    0.10    3.97
  10   1   6    1.47    4.41
  -5   6   5  566.24   24.84
  10   4  -3  220.01   13.44
  10  -4  -3  238.61   13.39
  10   4  -3  234.63   15.54
 -10   4   3  233.24   13.62
  10   3   4    2.04    4.86
  10   4   1    7.83    4.85
  10   4   1    2.18    4.64
   5   6   4  513.74   23.92
   5   6   4  493.52   23.22
  12   0  -4  393.30   19.31
  12  -1   1  325.22   17.65
  12  -1   1  335.30   18.02
;

_shelx_hkl_checksum   87269

#==============================================================================
#     End of CIF
#==============================================================================
