# Supplementary material for: Solid State Structure and Hydrogen Bonding of Some Cyclic NH Carboximides
Source: MDPI journal article supplement (doi:10.3390/cryst13010150), 2023-01-15
Supplement: s1 [file s1 › 11.cif]

data_11
_audit_creation_date                               2020-08-27
_audit_creation_method                            'by CrystalStructure 4.3'

_publ_section_references
;
    ENTER OTHER REFERENCES

    Rigaku (2018). CrystalStructure. Version 4.3. 
    Rigaku Corporation, Tokyo, Japan.

    Sheldrick, G. M. (2014). Acta Cryst. (2014). A70, C1437.
    SHELXT Version 2018/2

    Sheldrick, G.M. (2008) SHELXL Version 2018/3, Acta Cryst. A64, 112-122.

    Rigaku (1998). REQAB. 
    Rigaku Corporation, Tokyo, Japan.

;


_chemical_formula_sum                             'C7 H11 N O2'
_chemical_formula_moiety                          'C7 H11 N O2'
_chemical_formula_weight                           141.17
_chemical_melting_point                            ?

#==============================================================================
# CRYSTAL DATA
_space_group_crystal_system                        monoclinic
_space_group_name_H-M_alt                         'P 1 21/n 1'
_space_group_name_Hall                            '-P 2yn'
_space_group_IT_number                             14
loop_
_space_group_symop_id
_space_group_symop_operation_xyz
1   '+X,+Y,+Z'
2   '1/2-X,1/2+Y,1/2-Z'
3   '-X,-Y,-Z'
4   '-1/2+X,-1/2-Y,-1/2+Z'
#------------------------------------------------------------------------------
_cell_length_a                                     15.276(3)
_cell_length_b                                     6.3447(11)
_cell_length_c                                     15.358(3)
_cell_angle_alpha                                  90.0000
_cell_angle_beta                                   90.108(5)
_cell_angle_gamma                                  90.0000
_cell_volume                                       1488.5(5)
_cell_formula_units_Z                              8
_cell_measurement_reflns_used                      4231
_cell_measurement_theta_min                        1.90
_cell_measurement_theta_max                        27.50
_cell_measurement_temperature                      93
#------------------------------------------------------------------------------
_exptl_crystal_description                         prism
_exptl_crystal_colour                              colorless
_exptl_crystal_size_max                            0.200
_exptl_crystal_size_mid                            0.030
_exptl_crystal_size_min                            0.030
_exptl_crystal_density_diffrn                      1.260
_exptl_crystal_density_meas                        ?
_exptl_crystal_density_method                     'not measured'
_exptl_crystal_F_000                               608.00
_exptl_absorpt_coefficient_mu                      0.092
_exptl_absorpt_correction_type                     multi-scan
_exptl_absorpt_process_details                    'REQAB (Rigaku, 1998)'
_exptl_absorpt_correction_T_min                    0.590
_exptl_absorpt_correction_T_max                    0.997

#==============================================================================
# EXPERIMENTAL DATA

_diffrn_ambient_temperature                        93
_diffrn_radiation_type                            'Mo K\a'
_diffrn_radiation_wavelength                       0.71075
_diffrn_measurement_device_type                   'Rigaku XtaLAB P200'
_diffrn_measurement_method                         \w
_diffrn_detector_area_resol_mean                   5.814
_diffrn_reflns_number                              15821
_diffrn_reflns_av_unetI/netI                       0.0243
_diffrn_reflns_av_R_equivalents                    0.0399
_diffrn_reflns_theta_max                           25.335
_diffrn_reflns_theta_min                           2.653
_diffrn_reflns_theta_full                          25.242
_diffrn_measured_fraction_theta_max                0.993
_diffrn_measured_fraction_theta_full               0.993
_diffrn_reflns_Laue_measured_fraction_max          0.993
_diffrn_reflns_Laue_measured_fraction_full         0.993
_diffrn_reflns_point_group_measured_fraction_max   0.993
_diffrn_reflns_point_group_measured_fraction_full  0.993
_diffrn_reflns_limit_h_min                        -18
_diffrn_reflns_limit_h_max                         18
_diffrn_reflns_limit_k_min                        -7
_diffrn_reflns_limit_k_max                         7
_diffrn_reflns_limit_l_min                        -18
_diffrn_reflns_limit_l_max                         18
_diffrn_standards_number                           0
_diffrn_standards_interval_count                   .
_diffrn_standards_decay_%                          ?
_reflns_number_total                               2699
_reflns_number_gt                                  2490
_reflns_threshold_expression                       F^2^>2.0\s(F^2^)
_reflns_Friedel_coverage          0.000
_reflns_Friedel_fraction_max      .
_reflns_Friedel_fraction_full     .

#==============================================================================
# REFINEMENT DATA

_refine_special_details
;
    Refinement was performed using all reflections. The weighted 
    R-factor (wR) and goodness of fit (S) are based on F^2^.
    R-factor (gt) are based on F. The threshold expression of
    F^2^ > 2.0 sigma(F^2^) is used only for calculating R-factor (gt).
;
_refine_ls_structure_factor_coef                   Fsqd
_refine_ls_R_factor_all                            0.0486
_refine_ls_R_factor_gt                             0.0452
_refine_ls_wR_factor_ref                           0.1618
_refine_ls_wR_factor_gt                            0.1592
_refine_ls_number_restraints                       2
_refine_ls_hydrogen_treatment                      mixed
_refine_ls_number_reflns                           2699
_refine_ls_number_parameters                       194
_refine_ls_goodness_of_fit_ref                     1.196
_refine_ls_weighting_scheme                        calc
_refine_ls_weighting_details
           'w = 1/[\s^2^(Fo^2^)+(0.0988P)^2^+0.5139P] where P=(Fo^2^+2Fc^2^)/3'
_atom_sites_solution_hydrogens                     geom
_atom_sites_solution_primary                       direct
_atom_sites_solution_secondary                     difmap
_refine_ls_shift/su_max                            0.000
_refine_diff_density_max                           0.27
_refine_diff_density_min                          -0.17
_refine_ls_extinction_method                       SHELXL
_refine_ls_extinction_coef                         0.015(6)

loop_
_atom_type_symbol
_atom_type_description
_atom_type_scat_dispersion_real
_atom_type_scat_dispersion_imag
_atom_type_scat_source
  'C' 'C'  0.0033 0.0016 
;
International Tables for Crystallography
(Vol. C, Tables 4.2.6.8 and 6.1.1.4)
;
  'H' 'H'  0.0000 0.0000 
;
International Tables for Crystallography
(Vol. C, Table 6.1.1.4)
;
  'N' 'N'  0.0061 0.0033 
;
International Tables for Crystallography
(Vol. C, Tables 4.2.6.8 and 6.1.1.4)
;
  'O' 'O'  0.0106 0.0060 
;
International Tables for Crystallography
(Vol. C, Tables 4.2.6.8 and 6.1.1.4)
;

#==============================================================================
# ATOMIC COORDINATES AND THERMAL PARAMETERS

loop_
 _atom_site_label
 _atom_site_type_symbol
 _atom_site_fract_x
 _atom_site_fract_y
 _atom_site_fract_z
 _atom_site_U_iso_or_equiv
 _atom_site_adp_type
 _atom_site_occupancy
 _atom_site_site_symmetry_order  
 _atom_site_calc_flag
 _atom_site_refinement_flags_posn
 _atom_site_refinement_flags_adp
 _atom_site_refinement_flags_occupancy
 _atom_site_disorder_assembly
 _atom_site_disorder_group
O2 O 0.72388(8) 0.3686(2) 0.43577(8) 0.0225(4) Uani 1 1 d . . . . .
O6 O 0.49917(8) 0.5110(2) 0.61548(8) 0.0206(4) Uani 1 1 d . . . . .
O12 O 0.44026(8) 1.0451(2) 0.26907(9) 0.0244(4) Uani 1 1 d . . . . .
O16 O 0.61275(8) 0.9241(2) 0.50152(8) 0.0217(4) Uani 1 1 d . . . . .
N1 N 0.61429(10) 0.4293(2) 0.52984(10) 0.0175(4) Uani 1 1 d D . . . .
N11 N 0.53134(10) 0.9944(2) 0.38225(10) 0.0181(4) Uani 1 1 d D . . . .
C2 C 0.70186(12) 0.3922(3) 0.51146(11) 0.0172(4) Uani 1 1 d . . . . .
C3 C 0.76604(11) 0.3918(3) 0.58712(11) 0.0180(4) Uani 1 1 d . . . . .
C4 C 0.71884(11) 0.3311(3) 0.67161(12) 0.0205(4) Uani 1 1 d . . . . .
H4A H 0.702486 0.180240 0.668972 0.025 Uiso 1 1 calc R U . . .
H4B H 0.759428 0.350001 0.721329 0.025 Uiso 1 1 calc R U . . .
C5 C 0.63679(12) 0.4623(3) 0.68714(12) 0.0203(4) Uani 1 1 d . . . . .
H5A H 0.604449 0.402742 0.737219 0.024 Uiso 1 1 calc R U . . .
H5B H 0.654338 0.607830 0.702609 0.024 Uiso 1 1 calc R U . . .
C6 C 0.57724(12) 0.4699(3) 0.60994(12) 0.0169(4) Uani 1 1 d . . . . .
C7 C 0.80381(12) 0.6181(3) 0.59356(12) 0.0226(4) Uani 1 1 d . . . . .
H7A H 0.755858 0.718730 0.601678 0.027 Uiso 1 1 calc R U . . .
H7B H 0.835394 0.651972 0.539869 0.027 Uiso 1 1 calc R U . . .
H7C H 0.844066 0.626552 0.643198 0.027 Uiso 1 1 calc R U . . .
C8 C 0.83973(12) 0.2341(3) 0.56826(13) 0.0242(5) Uani 1 1 d . . . . .
H8A H 0.870626 0.276401 0.515195 0.029 Uiso 1 1 calc R U . . .
H8B H 0.814752 0.093177 0.560255 0.029 Uiso 1 1 calc R U . . .
H8C H 0.880874 0.232098 0.617288 0.029 Uiso 1 1 calc R U . . .
C12 C 0.51442(11) 1.0085(3) 0.29361(12) 0.0174(4) Uani 1 1 d . . . . .
C13 C 0.59060(11) 0.9708(3) 0.23104(12) 0.0178(4) Uani 1 1 d . . . . .
C14 C 0.67753(12) 1.0119(3) 0.27763(12) 0.0197(4) Uani 1 1 d . . . . .
H14A H 0.726280 0.969488 0.239032 0.024 Uiso 1 1 calc R U . . .
H14B H 0.683278 1.164843 0.289075 0.024 Uiso 1 1 calc R U . . .
C15 C 0.68510(12) 0.8924(3) 0.36355(12) 0.0206(4) Uani 1 1 d . . . . .
H15A H 0.687729 0.739206 0.351635 0.025 Uiso 1 1 calc R U . . .
H15B H 0.740082 0.933426 0.393274 0.025 Uiso 1 1 calc R U . . .
C16 C 0.60886(12) 0.9378(3) 0.42224(12) 0.0179(4) Uani 1 1 d . . . . .
C17 C 0.58160(13) 1.1197(3) 0.15321(13) 0.0239(5) Uani 1 1 d . . . . .
H17A H 0.631387 1.099934 0.113904 0.029 Uiso 1 1 calc R U . . .
H17B H 0.580577 1.265881 0.173842 0.029 Uiso 1 1 calc R U . . .
H17C H 0.527061 1.088837 0.122021 0.029 Uiso 1 1 calc R U . . .
C18 C 0.58436(12) 0.7403(3) 0.19924(12) 0.0227(4) Uani 1 1 d . . . . .
H18A H 0.586034 0.645051 0.249455 0.027 Uiso 1 1 calc R U . . .
H18B H 0.633766 0.709380 0.160675 0.027 Uiso 1 1 calc R U . . .
H18C H 0.529333 0.720156 0.167407 0.027 Uiso 1 1 calc R U . . .
H1 H 0.5758(12) 0.451(4) 0.4797(10) 0.032(6) Uiso 1 1 d D . . . .
H11 H 0.4823(11) 1.018(4) 0.4218(13) 0.033(6) Uiso 1 1 d D . . . .

loop_
 _atom_site_aniso_label
 _atom_site_aniso_U_11
 _atom_site_aniso_U_22
 _atom_site_aniso_U_33
 _atom_site_aniso_U_23
 _atom_site_aniso_U_13
 _atom_site_aniso_U_12
O2 0.0242(7) 0.0261(7) 0.0172(7) -0.0028(5) 0.0005(5) -0.0005(5)
O6 0.0185(7) 0.0233(7) 0.0200(7) -0.0005(5) -0.0012(5) 0.0010(5)
O12 0.0188(7) 0.0311(8) 0.0233(7) -0.0039(6) -0.0009(5) 0.0004(5)
O16 0.0234(7) 0.0229(7) 0.0188(7) 0.0022(5) 0.0027(5) 0.0036(5)
N1 0.0181(8) 0.0186(8) 0.0158(8) 0.0000(6) -0.0022(6) 0.0001(6)
N11 0.0182(8) 0.0190(8) 0.0171(8) 0.0001(6) 0.0034(6) 0.0020(6)
C2 0.0196(9) 0.0130(8) 0.0190(9) 0.0004(7) -0.0011(7) -0.0015(7)
C3 0.0174(9) 0.0187(9) 0.0180(9) 0.0016(7) -0.0013(7) -0.0004(7)
C4 0.0198(9) 0.0229(10) 0.0186(9) 0.0044(7) -0.0019(7) 0.0003(7)
C5 0.0194(9) 0.0246(10) 0.0169(9) 0.0005(7) -0.0010(7) -0.0003(7)
C6 0.0197(9) 0.0125(8) 0.0184(9) 0.0002(6) -0.0002(7) -0.0017(7)
C7 0.0234(9) 0.0226(10) 0.0218(10) -0.0005(7) -0.0011(7) -0.0051(7)
C8 0.0221(9) 0.0257(10) 0.0248(10) 0.0012(8) -0.0009(7) 0.0044(8)
C12 0.0185(9) 0.0139(8) 0.0197(9) -0.0020(7) 0.0019(7) -0.0003(7)
C13 0.0181(9) 0.0186(9) 0.0167(9) -0.0012(7) 0.0021(7) -0.0005(7)
C14 0.0182(9) 0.0201(9) 0.0208(10) 0.0000(7) 0.0035(7) -0.0012(7)
C15 0.0186(9) 0.0232(9) 0.0202(10) -0.0001(7) 0.0018(7) 0.0028(7)
C16 0.0196(9) 0.0136(8) 0.0207(9) 0.0000(7) 0.0023(7) -0.0004(7)
C17 0.0248(10) 0.0251(10) 0.0220(10) 0.0026(8) 0.0026(8) 0.0017(8)
C18 0.0250(9) 0.0206(10) 0.0225(10) -0.0047(8) 0.0041(7) -0.0014(8)

#==============================================================================
_computing_data_collection
                                'CrystalClear-SM Expert 2.1 b45 (Rigaku, 2015)'
_computing_cell_refinement
                                               'CrystalClear-SM Expert 2.1 b45'
_computing_data_reduction
                                               'CrystalClear-SM Expert 2.1 b45'
_computing_structure_solution
                                      'SHELXT Version 2018/2 (Sheldrick, 2014)'
_computing_structure_refinement
                                      'SHELXL Version 2018/3 (Sheldrick, 2008)'
_computing_publication_material
                                          'CrystalStructure 4.3 (Rigaku, 2018)'
_computing_molecular_graphics                     'CrystalStructure 4.3'

#==============================================================================
# MOLECULAR GEOMETRY

_geom_special_details
;
 All esds (except the esd in the dihedral angle between two l.s. planes)
 are estimated using the full covariance matrix.  The cell esds are taken
 into account individually in the estimation of esds in distances, angles
 and torsion angles; correlations between esds in cell parameters are only
 used when they are defined by crystal symmetry.  An approximate (isotropic)
 treatment of cell esds is used for estimating esds involving l.s. planes.
;

loop_
 _geom_bond_atom_site_label_1
 _geom_bond_atom_site_label_2
 _geom_bond_distance
 _geom_bond_site_symmetry_2
 _geom_bond_publ_flag
O2 C2 1.220(2) . ?
O6 C6 1.224(2) . ?
O12 C12 1.216(2) . ?
O16 C16 1.222(2) . ?
N1 C6 1.379(2) . ?
N1 C2 1.388(2) . ?
N1 H1 0.978(5) . ?
N11 C16 1.380(2) . ?
N11 C12 1.388(2) . ?
N11 H11 0.977(5) . ?
C2 C3 1.519(3) . ?
C3 C8 1.534(2) . ?
C3 C4 1.535(2) . ?
C3 C7 1.550(3) . ?
C4 C5 1.524(2) . ?
C4 H4A 0.9900 . ?
C4 H4B 0.9900 . ?
C5 C6 1.494(3) . ?
C5 H5A 0.9900 . ?
C5 H5B 0.9900 . ?
C7 H7A 0.9800 . ?
C7 H7B 0.9800 . ?
C7 H7C 0.9800 . ?
C8 H8A 0.9800 . ?
C8 H8B 0.9800 . ?
C8 H8C 0.9800 . ?
C12 C13 1.529(2) . ?
C13 C17 1.530(3) . ?
C13 C14 1.530(3) . ?
C13 C18 1.545(3) . ?
C14 C15 1.526(3) . ?
C14 H14A 0.9900 . ?
C14 H14B 0.9900 . ?
C15 C16 1.502(2) . ?
C15 H15A 0.9900 . ?
C15 H15B 0.9900 . ?
C17 H17A 0.9800 . ?
C17 H17B 0.9800 . ?
C17 H17C 0.9800 . ?
C18 H18A 0.9800 . ?
C18 H18B 0.9800 . ?
C18 H18C 0.9800 . ?

loop_
 _geom_angle_atom_site_label_1
 _geom_angle_atom_site_label_2
 _geom_angle_atom_site_label_3
 _geom_angle
 _geom_angle_site_symmetry_1
 _geom_angle_site_symmetry_3
 _geom_angle_publ_flag
C6 N1 C2 127.63(16) . . ?
C6 N1 H1 115.5(14) . . ?
C2 N1 H1 116.2(14) . . ?
C16 N11 C12 127.65(15) . . ?
C16 N11 H11 114.9(15) . . ?
C12 N11 H11 117.3(15) . . ?
O2 C2 N1 118.84(16) . . ?
O2 C2 C3 123.37(16) . . ?
N1 C2 C3 117.75(15) . . ?
C2 C3 C8 109.23(15) . . ?
C2 C3 C4 110.09(14) . . ?
C8 C3 C4 110.00(15) . . ?
C2 C3 C7 106.68(14) . . ?
C8 C3 C7 110.05(15) . . ?
C4 C3 C7 110.73(15) . . ?
C5 C4 C3 112.52(15) . . ?
C5 C4 H4A 109.1 . . ?
C3 C4 H4A 109.1 . . ?
C5 C4 H4B 109.1 . . ?
C3 C4 H4B 109.1 . . ?
H4A C4 H4B 107.8 . . ?
C6 C5 C4 113.15(15) . . ?
C6 C5 H5A 108.9 . . ?
C4 C5 H5A 108.9 . . ?
C6 C5 H5B 108.9 . . ?
C4 C5 H5B 108.9 . . ?
H5A C5 H5B 107.8 . . ?
O6 C6 N1 120.23(17) . . ?
O6 C6 C5 122.93(16) . . ?
N1 C6 C5 116.84(16) . . ?
C3 C7 H7A 109.5 . . ?
C3 C7 H7B 109.5 . . ?
H7A C7 H7B 109.5 . . ?
C3 C7 H7C 109.5 . . ?
H7A C7 H7C 109.5 . . ?
H7B C7 H7C 109.5 . . ?
C3 C8 H8A 109.5 . . ?
C3 C8 H8B 109.5 . . ?
H8A C8 H8B 109.5 . . ?
C3 C8 H8C 109.5 . . ?
H8A C8 H8C 109.5 . . ?
H8B C8 H8C 109.5 . . ?
O12 C12 N11 119.20(16) . . ?
O12 C12 C13 123.02(17) . . ?
N11 C12 C13 117.76(16) . . ?
C17 C13 C14 109.68(15) . . ?
C17 C13 C12 109.09(15) . . ?
C14 C13 C12 109.90(15) . . ?
C17 C13 C18 109.42(15) . . ?
C14 C13 C18 111.24(15) . . ?
C12 C13 C18 107.46(14) . . ?
C15 C14 C13 112.58(15) . . ?
C15 C14 H14A 109.1 . . ?
C13 C14 H14A 109.1 . . ?
C15 C14 H14B 109.1 . . ?
C13 C14 H14B 109.1 . . ?
H14A C14 H14B 107.8 . . ?
C16 C15 C14 111.47(15) . . ?
C16 C15 H15A 109.3 . . ?
C14 C15 H15A 109.3 . . ?
C16 C15 H15B 109.3 . . ?
C14 C15 H15B 109.3 . . ?
H15A C15 H15B 108.0 . . ?
O16 C16 N11 120.12(16) . . ?
O16 C16 C15 123.22(17) . . ?
N11 C16 C15 116.65(16) . . ?
C13 C17 H17A 109.5 . . ?
C13 C17 H17B 109.5 . . ?
H17A C17 H17B 109.5 . . ?
C13 C17 H17C 109.5 . . ?
H17A C17 H17C 109.5 . . ?
H17B C17 H17C 109.5 . . ?
C13 C18 H18A 109.5 . . ?
C13 C18 H18B 109.5 . . ?
H18A C18 H18B 109.5 . . ?
C13 C18 H18C 109.5 . . ?
H18A C18 H18C 109.5 . . ?
H18B C18 H18C 109.5 . . ?

loop_
 _geom_torsion_atom_site_label_1
 _geom_torsion_atom_site_label_2
 _geom_torsion_atom_site_label_3
 _geom_torsion_atom_site_label_4
 _geom_torsion
 _geom_torsion_site_symmetry_1
 _geom_torsion_site_symmetry_2
 _geom_torsion_site_symmetry_3
 _geom_torsion_site_symmetry_4
 _geom_torsion_publ_flag
C6 N1 C2 O2 -176.58(17) . . . . ?
C6 N1 C2 C3 1.1(3) . . . . ?
O2 C2 C3 C8 -35.1(2) . . . . ?
N1 C2 C3 C8 147.34(16) . . . . ?
O2 C2 C3 C4 -156.02(17) . . . . ?
N1 C2 C3 C4 26.5(2) . . . . ?
O2 C2 C3 C7 83.8(2) . . . . ?
N1 C2 C3 C7 -93.74(18) . . . . ?
C2 C3 C4 C5 -51.3(2) . . . . ?
C8 C3 C4 C5 -171.71(15) . . . . ?
C7 C3 C4 C5 66.43(19) . . . . ?
C3 C4 C5 C6 50.2(2) . . . . ?
C2 N1 C6 O6 176.01(16) . . . . ?
C2 N1 C6 C5 -3.6(3) . . . . ?
C4 C5 C6 O6 157.98(17) . . . . ?
C4 C5 C6 N1 -22.5(2) . . . . ?
C16 N11 C12 O12 174.34(17) . . . . ?
C16 N11 C12 C13 -4.1(3) . . . . ?
O12 C12 C13 C17 38.4(2) . . . . ?
N11 C12 C13 C17 -143.24(16) . . . . ?
O12 C12 C13 C14 158.71(17) . . . . ?
N11 C12 C13 C14 -23.0(2) . . . . ?
O12 C12 C13 C18 -80.1(2) . . . . ?
N11 C12 C13 C18 98.23(18) . . . . ?
C17 C13 C14 C15 171.47(15) . . . . ?
C12 C13 C14 C15 51.6(2) . . . . ?
C18 C13 C14 C15 -67.34(19) . . . . ?
C13 C14 C15 C16 -54.4(2) . . . . ?
C12 N11 C16 O16 -176.94(16) . . . . ?
C12 N11 C16 C15 2.1(3) . . . . ?
C14 C15 C16 O16 -154.04(17) . . . . ?
C14 C15 C16 N11 26.9(2) . . . . ?

loop_
_geom_hbond_atom_site_label_D
_geom_hbond_atom_site_label_H
_geom_hbond_atom_site_label_A
_geom_hbond_site_symmetry_D
_geom_hbond_site_symmetry_H
_geom_hbond_site_symmetry_A
_geom_hbond_distance_DA
_geom_hbond_distance_DH
_geom_hbond_distance_HA
_geom_hbond_angle_DHA
_geom_hbond_publ_flag
N1 H1 O6 . . 3_666 2.849(2) 0.977(17) 1.871(17) 179.1(18) no
N11 H11 O16 . . 3_676 2.883(2) 0.977(19) 1.907(19) 178(2) no

#==============================================================================
# Additional structures and associated data_? identifiers
# should be added at this point if there is more than one 
# structure analysis in the CIF.

_shelx_res_file
;
TITL DSAA21
    shelxl.res
    created by SHELXL-2018/3 at 22:23:53 on 27-Aug-2020
CELL  0.71075 15.27600 6.34470 15.35800 90.00000 90.10800 90.00000
ZERR  8 0.00300 0.00110 0.00300 0.00000 0.00500 0.00000
LATT 1
SYMM .50-X, .50+Y, .50-Z
SFAC C H N O
UNIT 56 88 8 16
OMIT    -1   1   2
OMIT     3   0   5
OMIT    -1   0   1
OMIT    -2   0   2
OMIT     0   2   0
OMIT     1   1   0
L.S. 20
FMAP 2
PLAN 5
WPDB -2
HTAB
BOND $H
CONF
LIST 4
TEMP -180.0
ACTA
SIZE 0.030 0.030 0.200
DFIX 0.9800 0.0050 N1 H1 N11 H11
WGHT    0.098800    0.513900
EXTI    0.014692
FVAR       0.47256
O2    4    0.723877    0.368611    0.435770    11.00000    0.02416    0.02606 =
         0.01716   -0.00282    0.00051   -0.00047
O6    4    0.499166    0.511019    0.615484    11.00000    0.01855    0.02334 =
         0.01996   -0.00052   -0.00118    0.00104
O12   4    0.440257    1.045074    0.269069    11.00000    0.01879    0.03109 =
         0.02332   -0.00386   -0.00093    0.00036
O16   4    0.612747    0.924064    0.501525    11.00000    0.02339    0.02295 =
         0.01885    0.00220    0.00272    0.00356
N1    3    0.614294    0.429251    0.529843    11.00000    0.01809    0.01862 =
         0.01579   -0.00005   -0.00220    0.00012
N11   3    0.531335    0.994411    0.382252    11.00000    0.01820    0.01902 =
         0.01714    0.00006    0.00343    0.00197
C2    1    0.701857    0.392194    0.511455    11.00000    0.01956    0.01298 =
         0.01903    0.00043   -0.00109   -0.00153
C3    1    0.766045    0.391833    0.587124    11.00000    0.01736    0.01874 =
         0.01800    0.00162   -0.00129   -0.00036
C4    1    0.718842    0.331093    0.671609    11.00000    0.01984    0.02288 =
         0.01862    0.00442   -0.00189    0.00030
AFIX  23
H4A   2    0.702486    0.180240    0.668972    11.00000   -1.20000
H4B   2    0.759428    0.350001    0.721329    11.00000   -1.20000
AFIX   0
C5    1    0.636795    0.462341    0.687140    11.00000    0.01941    0.02465 =
         0.01686    0.00052   -0.00098   -0.00030
AFIX  23
H5A   2    0.604449    0.402742    0.737219    11.00000   -1.20000
H5B   2    0.654338    0.607830    0.702609    11.00000   -1.20000
AFIX   0
C6    1    0.577237    0.469894    0.609939    11.00000    0.01970    0.01249 =
         0.01845    0.00025   -0.00017   -0.00169
C7    1    0.803813    0.618074    0.593559    11.00000    0.02344    0.02260 =
         0.02183   -0.00050   -0.00107   -0.00506
AFIX 137
H7A   2    0.755858    0.718730    0.601678    11.00000   -1.20000
H7B   2    0.835394    0.651972    0.539869    11.00000   -1.20000
H7C   2    0.844066    0.626552    0.643198    11.00000   -1.20000
AFIX   0
C8    1    0.839726    0.234140    0.568263    11.00000    0.02211    0.02575 =
         0.02476    0.00120   -0.00092    0.00440
AFIX 137
H8A   2    0.870626    0.276401    0.515195    11.00000   -1.20000
H8B   2    0.814752    0.093177    0.560255    11.00000   -1.20000
H8C   2    0.880874    0.232098    0.617288    11.00000   -1.20000
AFIX   0
C12   1    0.514423    1.008455    0.293606    11.00000    0.01854    0.01394 =
         0.01966   -0.00197    0.00194   -0.00033
C13   1    0.590597    0.970778    0.231038    11.00000    0.01815    0.01858 =
         0.01674   -0.00116    0.00208   -0.00053
C14   1    0.677530    1.011906    0.277631    11.00000    0.01823    0.02012 =
         0.02081    0.00003    0.00348   -0.00120
AFIX  23
H14A  2    0.726280    0.969488    0.239032    11.00000   -1.20000
H14B  2    0.683278    1.164843    0.289075    11.00000   -1.20000
AFIX   0
C15   1    0.685100    0.892421    0.363549    11.00000    0.01856    0.02321 =
         0.02018   -0.00010    0.00185    0.00275
AFIX  23
H15A  2    0.687729    0.739206    0.351635    11.00000   -1.20000
H15B  2    0.740082    0.933426    0.393274    11.00000   -1.20000
AFIX   0
C16   1    0.608857    0.937825    0.422236    11.00000    0.01958    0.01357 =
         0.02066    0.00003    0.00231   -0.00045
C17   1    0.581597    1.119742    0.153209    11.00000    0.02477    0.02510 =
         0.02198    0.00263    0.00263    0.00169
AFIX 137
H17A  2    0.631387    1.099934    0.113904    11.00000   -1.20000
H17B  2    0.580577    1.265881    0.173842    11.00000   -1.20000
H17C  2    0.527061    1.088837    0.122021    11.00000   -1.20000
AFIX   0
C18   1    0.584363    0.740273    0.199237    11.00000    0.02501    0.02056 =
         0.02247   -0.00466    0.00414   -0.00144
AFIX 137
H18A  2    0.586034    0.645051    0.249455    11.00000   -1.20000
H18B  2    0.633766    0.709380    0.160675    11.00000   -1.20000
H18C  2    0.529333    0.720156    0.167407    11.00000   -1.20000
AFIX   0
H1    2    0.575842    0.450638    0.479667    11.00000    0.03238
H11   2    0.482311    1.018056    0.421797    11.00000    0.03311
HKLF 4


REM  DSAA21
REM wR2 = 0.1618, GooF = S = 1.196, Restrained GooF = 1.196 for all data
REM R1 = 0.0452 for 2490 Fo > 4sig(Fo) and 0.0486 for all 2699 data
REM 194 parameters refined using 2 restraints

END

WGHT      0.0432      1.0698

REM Instructions for potential hydrogen bonds
EQIV $1 -x+1, -y+1, -z+1
HTAB N1 O6_$1
EQIV $2 -x+1, -y+2, -z+1
HTAB N11 O16_$2

REM Highest difference peak  0.274,  deepest hole -0.167,  1-sigma level  0.046
Q1    1   0.5538  1.0017  0.2647  11.00000  0.05    0.27
Q2    1   0.7391  0.3621  0.6253  11.00000  0.05    0.26
Q3    1   0.6483  0.9108  0.3912  11.00000  0.05    0.25
Q4    1   0.8029  0.3234  0.5776  11.00000  0.05    0.23
Q5    1   0.7774  0.5076  0.5899  11.00000  0.05    0.23
;

_shelx_res_checksum   58165

_shelx_hkl_file
;
   0   0   1   -0.03    1.20
   0   0   1   -0.31    0.34
   0   0  -1   -3.81    2.14
   1   0   0    0.08    0.40
  -1   0   0    0.12    2.32
   1   0   0   -0.09    0.38
  -1   0   1   -0.57    0.38
   0   0   2    6.76    1.88
   0   0  -2   -0.12    0.73
   0   0   2    0.06    1.85
   0   0  -2    6.18    2.73
   0   0   2    6.38    1.51
  -2   0   0    0.06    0.20
   2   0   0   -0.17    1.23
   2   0   0    6.18    0.96
   2   0   0    6.14    0.68
  -2   0   0    5.82    2.41
  -2   0   0   -0.16    0.46
  -1   0   2    0.11    0.66
   1   0  -2   -0.24    0.87
  -1   0   2    0.12    1.33
  -1   0   2    0.29    0.70
   1   0  -2   -0.01    0.73
   1   0   2   -0.14    0.41
  -1   0  -2   -0.57    0.66
   1   0   2   -0.22    1.06
   1   0   2   -0.12    1.53
   2   0  -1    0.07    0.49
  -2   0   1    0.05    0.36
  -2   0   1    0.09    0.36
  -2   0   1   -0.24    1.57
   2   0  -1   -0.21    0.34
   2   0  -1    0.24    1.21
  -2   0  -1   -0.01    0.23
   2   0   1    0.01    0.36
   2   0   1   -0.01    0.65
   2   0   1   -0.75    1.08
   0   1   0   -0.17    0.65
   0  -1   0   -0.06    0.70
   0   1   0    0.22    0.62
   0   1   0    0.38    1.92
   0  -1   0   -0.14    0.64
  -1   1   0  198.29    7.76
   1   1  -1   62.88    2.91
   2   0  -2   -0.75    1.15
   2   0   2  954.25   33.35
   2   0   2  952.08   34.18
   2   0   2  938.44   33.21
   0   0  -3    0.16    0.52
   0   0  -3   -0.14    1.06
   0   0   3    0.33    1.08
   0   0   3    0.78    2.61
   0   0   3   -0.14    1.23
   0   0  -3    0.90    2.46
  -3   0   0   -0.13    2.14
   3   0   0   -0.02    0.38
   3   0   0   -0.11    0.40
  -3   0   0    0.07    0.35
   3   0   0   -0.72    1.91
   0   1  -2  385.84   14.87
   0   1  -2  370.81   15.95
   0   1   2  396.04   14.32
   0  -1   2  386.30   14.17
   0  -1   2  392.23   14.96
   0   1   2  372.74   13.65
   0   1  -2  395.15   15.17
   0   1   2  365.54   13.92
   2   1   0   86.88    3.90
  -2   1   0   89.58    4.43
  -2  -1   0   97.29    4.30
   2  -1   0   90.71    5.21
   2   1   0   87.84    4.45
   2  -1   0   91.74    5.04
   2   1   0  113.35    6.31
  -2   1   0   94.38    4.44
   1   0  -3  349.04   13.67
  -1   0   3  299.92   10.96
  -1   0   3  327.27   12.45
  -1   0   3  364.87   14.30
  -1   0   3  324.25   13.45
  -1   0  -3  311.20   14.09
  -1   0  -3  354.85   13.55
   1   0   3  349.57   13.40
   1   0   3  338.21   13.23
  -1   0  -3  298.04   11.89
   1   0   3  355.77   13.06
   1   0   3  424.23   19.69
   3   0  -1  354.93   12.83
   3   0  -1  359.74   12.88
  -3   0   1  354.33   12.94
  -3   0   1  364.69   13.05
  -3   0   1  372.70   15.28
   3   0   1  357.47   12.86
   3   0   1  312.86   13.17
   3   0   1  356.04   12.71
  -3   0  -1  365.34   15.00
   1  -1  -2   -2.32    1.41
   1  -1   2   72.54   15.80
   1   1   2   95.74    6.27
  -1   1  -2   85.54   12.74
   1   1   2  130.22    6.17
  -1   1  -2   67.76   11.93
  -1  -1  -2  127.12    5.20
   1   1   2   88.78    8.78
  -2  -1   1  363.60   14.37
   2   1  -1  345.92   13.40
  -2   1   1  361.06   19.46
   2  -1  -1  363.05   20.99
  -2   1   1  508.22   20.48
  -2  -1   1  342.92   14.94
   2   1  -1  356.30   23.15
   2   1  -1  361.02   16.95
  -2   1   1  367.96   13.30
   2  -1  -1  358.15   18.79
   2   0  -3   -0.02    0.63
  -2   0   3   -0.04    0.44
  -2   0   3    0.05    0.87
  -2   0   3   -0.04    1.36
   2   0  -3    0.91    1.48
  -2   0  -3   -1.23    0.38
  -2   0  -3    0.42    0.97
   2   0   3   -0.62    1.02
  -2   0  -3    0.14    1.37
   2   0   3    0.26    0.71
  -3   0   2   -0.18    1.74
  -3   0   2   -0.14    0.55
   3   0  -2    0.17    0.45
  -3   0   2    0.13    0.42
   3   0  -2    0.07    1.68
   3   0   2   -0.17    0.40
   3   0   2   -0.32    0.98
  -2   1  -2   24.76    2.43
   2   1   2   21.91    1.89
  -2  -1  -2   19.40    1.85
   2   1   2   24.63    3.12
   2  -1   2   21.98    1.92
   2  -1   2   22.01    1.93
   2   1   2   20.93    2.55
   2   1   2   22.72    2.17
   0   1   3    3.53    2.16
   0   1   3    3.01    1.19
   0   1  -3    4.05    1.51
   0  -1   3    4.22    1.49
   0   1   3    3.87    0.83
   0  -1  -3    4.09    0.88
   0   1   3    3.92    0.62
   0  -1  -3    3.44    0.67
   0  -1   3    3.83    0.82
   0  -1   3    3.30    3.03
   0   1  -3    2.23    2.56
   3  -1   0    0.03    0.56
  -3   1   0    0.46    0.46
   3   1   0    0.29    0.67
  -3   1   0    0.40    0.51
   3   1   0    0.03    2.14
   3   1   0    0.37    1.08
  -3  -1   0    0.47    0.78
   3  -1   0    0.27    0.53
   3  -1   0    0.03    1.59
  -3   1   0    0.38    1.75
  -3  -1   0    0.73    2.30
  -1   1   3   88.28    4.51
  -1   1   3   72.26    3.03
   1  -1  -3   67.66    3.09
  -1  -1   3   70.76    3.87
   1   1  -3   77.74    4.98
  -1   1   3   65.35    2.68
   1  -1  -3   81.57    4.16
   1   1  -3   80.58    4.22
   1   1  -3   69.46    3.74
   1   1   3    2.46    1.11
   1   1   3   14.27    3.54
   1   1   3    2.54    0.90
  -1  -1  -3    1.94    0.63
  -1  -1  -3   13.15    2.78
   3  -1  -1   20.47    1.73
  -3  -1   1   19.35    1.77
   3   1  -1   20.35    1.79
  -3   1   1   20.17    1.65
   3  -1  -1   19.53    1.74
   3   1  -1   19.74    3.07
  -3  -1   1   25.61    3.48
  -3   1   1   20.41    3.16
   3   1  -1   20.57    2.40
  -3   1   1   21.57    1.68
   3   1   1  541.35   20.12
   3   1   1  505.14   19.88
   3  -1   1  549.57   19.65
   3  -1   1  542.85   19.55
   3  -1   1  490.34   19.22
   3   1   1  501.59   18.05
  -3   1  -1  539.06   19.13
   0   0  -4   47.56    4.70
   0   0  -4   44.52    3.19
   0   0   4   44.25    3.64
   0   0  -4   48.09    3.88
   0   0   4   47.01    3.86
   0   0  -4   40.69    3.23
   0   0   4   47.27    4.98
   4   0   0   59.32    2.47
   4   0   0   55.48    5.14
  -4   0   0   60.85    4.52
   4   0   0   60.11    2.45
  -4   0   0   59.79    2.47
  -1   0   4    0.92    2.38
  -1   0   4    0.28    0.92
   1   0  -4    0.46    1.31
  -1   0   4   -0.16    1.16
  -1   0   4   -0.02    0.56
   1   0  -4    0.05    0.35
   1   0   4    0.37    3.35
  -1   0  -4   -0.79    1.19
   1   0   4   -0.48    1.17
  -1   0  -4    0.11    0.95
   1   0   4   -0.12    0.64
   1   0   4   -0.18    0.98
  -4   0   1   -0.00    0.35
   4   0  -1   -0.19    0.39
  -4   0   1   -0.84    1.82
   4   0  -1   -0.08    0.35
  -4   0  -1   -0.14    2.03
   4   0   1    0.03    0.44
   4   0   1   -0.79    2.25
   4   0   1   -0.15    0.38
  -4   0  -1    0.16    0.40
  -3   0   3  203.53    8.93
  -3   0   3  199.99    7.76
  -3   0   3  194.89    7.22
   3   0  -3  212.76    7.99
   3   0   3  108.85    4.18
  -3   0  -3  103.94    4.02
   3   0   3  112.07    4.74
   3   0   3  117.31    5.32
  -2  -1   3    2.60    1.70
   2   1  -3    2.18    1.65
  -2   1   3    2.93    1.58
  -2   1   3    2.88    0.62
   2  -1  -3    3.24    1.42
   2  -1  -3    2.76    0.77
  -2  -1   3    2.94    0.99
  -2  -1   3    2.77    1.26
   2   1  -3    2.78    1.27
  -2   1   3    3.05    0.55
  -2   1  -3  212.73    8.08
   2   1   3  224.18    8.54
  -2   1  -3  227.22    9.12
  -2  -1  -3  298.72   15.48
   2  -1   3  225.45    8.59
  -2  -1  -3  198.08    7.82
  -2  -1  -3  207.36    8.03
  -2   1  -3  185.60    7.23
   2   1   3  218.53    8.82
   2   1   3  229.57    8.61
  -3   1   2  105.24    5.54
   3   1  -2  112.86    5.73
  -3  -1   2  108.25    5.12
   3  -1  -2  105.93    4.22
   3  -1  -2  115.43    5.77
  -3  -1   2  111.85    6.04
  -3   1   2  115.48    4.42
  -3  -1   2  124.03    5.13
  -3   1   2  112.38    4.36
   3   1  -2  109.71    4.52
   3   1  -2  112.16    5.26
  -3  -1  -2    2.85    0.78
   3   1   2    4.14    2.03
   3   1   2    2.93    0.63
   3  -1   2    0.99    1.03
   3   1   2   11.87    2.41
  -2   0   4 1722.81   61.33
  -2   0   4 1585.13   55.80
   2   0  -4 1727.00   60.10
  -2   0   4 1702.01   59.30
   2   0  -4 1638.01   58.54
   2   0   4 1375.61   48.10
   2   0   4 1441.68   51.11
  -2   0  -4 1385.11   49.18
   2   0   4 1389.64   49.49
  -2   0  -4 1414.41   50.41
  -4   0   2 1073.52   41.39
  -4   0   2 1058.03   37.27
   4   0  -2  896.79   31.80
   4   0  -2 1083.27   38.01
  -4   0   2 1058.18   36.98
   4   0   2 1961.94   70.09
   0  -1   4   20.50    2.28
   0   1   4   20.92    1.81
   0   1  -4   25.90    3.83
   0   1   4   25.18    3.46
   0   1  -4   26.87    2.73
   0  -1   4   19.33    1.70
   0   1  -4   21.29    2.17
   0  -1  -4   22.57    1.97
   0  -1  -4   18.48    1.67
   0  -1   4   20.31    3.58
   0  -1  -4   29.29    2.73
   0   1   4   31.50    2.87
   0   1   4   18.94    1.53
  -4   1   0  205.72    9.36
  -4  -1   0  210.88    9.81
   4  -1   0  206.35    7.72
   4   1   0  211.74    9.69
   4  -1   0  206.22    7.79
  -4   1   0  229.44    8.36
   4   1   0  215.10    8.03
  -4  -1   0  209.99    7.98
   4   1   0  219.52    8.79
  -4  -1   0  221.18    9.08
   4  -1   0  206.84    9.65
   1   1  -4  304.89   11.30
   1  -1  -4  319.68   11.89
   1   1  -4  304.15   11.49
   1  -1  -4  293.79   10.67
  -1  -1   4  324.34   12.64
  -1   1   4  328.89   11.85
  -1   1   4  313.37   11.29
   1   1  -4  322.39   12.68
  -1   1   4  311.26   12.29
  -1  -1   4  286.11   12.74
   1   1  -4  321.34   13.52
   1  -1  -4  307.68   12.05
  -1   1   4  291.36   12.10
  -1  -1  -4  252.59   11.42
   1  -1   4  247.78    9.48
   1   1   4  216.84    8.54
   1   1   4  231.59   11.18
  -1   1  -4  238.71    9.60
   1   1   4  249.53    9.09
  -1  -1  -4  232.65    8.68
  -1   1  -4  206.17    8.57
  -1   1  -4  225.05    8.67
   1   1   4  248.57    9.89
   1  -1   4  239.31    9.65
  -1   1  -4  229.97   11.16
   1   1   4  263.11    9.96
  -4   1   1  204.11    9.46
  -4   1   1  215.60    7.90
  -4  -1   1  206.02    9.61
   4  -1  -1  198.70    9.16
  -4  -1   1  203.19    7.76
   4  -1  -1  204.88    7.66
   4   1  -1  199.49    9.34
   4  -1  -1  199.31    7.49
   4   1  -1  175.94    7.29
  -4   1   1  209.04    7.71
   4   1  -1  197.99    7.47
   4   1   1  242.65    8.95
  -4   1  -1  238.32    8.75
  -4  -1  -1  265.18   11.60
   4   1   1  224.95    8.98
   4  -1   1  219.91    8.34
   4  -1   1  238.27    8.90
  -4  -1  -1  242.21    9.82
   4   1   1  245.11   10.91
   4  -1   1  231.37   10.34
   0  -2   0 4336.29  149.56
   0   2   0 4260.39  151.58
   0  -2   0 4143.66  153.46
   0   2   0 4326.07  146.23
   0   2   0 4240.03  150.81
   3   1  -3   43.47    3.53
   3  -1  -3   41.72    3.61
  -3  -1   3   43.19    3.61
  -3   1   3   44.40    3.05
   3  -1  -3   41.67    2.92
  -3   1   3   41.45    3.71
  -3  -1   3   44.07    3.30
  -3   1   3   44.52    3.03
   3  -1  -3   37.74    2.68
  -3  -1   3   40.99    3.85
   3   1  -3   41.57    3.69
  -3  -1  -3    2.19    0.75
  -3   1  -3    1.84    0.52
   3   1   3    1.63    0.54
   3  -1   3    3.23    1.18
   3   1   3    2.06    1.34
  -3   1  -3    1.92    0.69
   3  -1   3    2.06    0.75
   3  -1   3    1.48    0.71
   3   1   3    3.32    1.10
  -3   1  -3    3.23    1.07
   3   1   3    2.17    0.77
   0  -2   1  211.03   14.27
   0   2  -1  187.07    7.27
   0   2  -1  186.76    9.83
   0   2  -1  209.03   11.36
   0  -2   1  164.12    7.32
   0   2  -1  175.49    6.91
   0   2   1  166.97    7.32
   0   2   1  174.55    6.84
   1   2   0 1753.34   61.33
  -1   2   0 1656.88   57.95
  -1  -2   0 1743.81   61.04
  -1   2   0 1740.82   60.86
  -1   2   0 1660.87   58.86
   1  -2   0 1595.94   57.68
  -1  -2   0 1681.30   60.87
   1  -2   0 1767.29   62.01
   1  -2   0 1719.42   60.28
   1   2   0 1769.59   61.89
   1   2   0 1578.50   56.67
   1   2   0 1716.00   60.71
   1   2   0 1840.80   66.40
   0   0   5    0.01    1.08
   0   0  -5   -0.13    0.61
   0   0   5   -0.09    2.39
   0   0  -5    0.35    1.18
   0   0  -5   -0.03    0.47
   0   0   5   -0.68    0.96
  -3   0   4   -0.01    0.38
   3   0  -4    0.05    0.34
  -3   0   4   -0.36    1.44
   3   0  -4   -0.11    0.52
  -3   0   4   -0.04    0.80
  -4   0   3   -0.37    1.57
   4   0  -3   -0.28    0.45
  -4   0   3    0.13    0.71
  -4   0   3    0.07    0.38
   3   0   4   -0.24    0.34
  -3   0  -4    0.11    0.27
  -3   0  -4    0.56    1.44
   3   0   4    0.30    0.96
  -3   0  -4    0.57    1.06
   4   0   3   -0.08    0.49
   4   0   3   -0.03    0.31
  -4   0  -3    0.09    0.35
   4   0   3    0.10    0.96
  -5   0   0   -0.08    0.39
  -5   0   0   -0.43    1.86
  -5   0   0   -0.08    0.43
   5   0   0   -0.20    0.33
   5   0   0   -0.12    0.35
   1   2   1 2451.74   88.65
   1   2   1 2641.13   92.05
   1   2   1 2683.66   94.46
  -1   2  -1 2648.16   92.22
   1  -2   1 2779.19   99.19
  -1   2  -1 2550.80   89.76
   1  -2   1 2541.51   91.74
  -1   2  -1 2547.99   88.77
  -1  -2  -1 2531.13   89.89
   1  -2   1 2577.91   90.00
  -2  -1   4  409.34   15.55
   2  -1  -4  394.27   15.13
  -2  -1   4  421.13   15.52
  -2   1   4  404.09   15.59
  -2   1   4  415.59   14.83
   2   1  -4  424.40   16.15
   2  -1  -4  381.31   13.83
  -2  -1   4  405.73   15.82
   2   1  -4  391.77   15.10
  -2   1   4  436.84   15.50
   2   1  -4  410.37   15.04
  -2   1  -4   75.51    3.40
   2   1   4   75.32    3.32
   2   1   4   82.23    3.58
  -2   1  -4   97.82    7.98
  -2  -1  -4   73.39    5.27
  -2   1  -4   75.77    3.33
   2   1   4   77.28    3.14
   2  -1   4   72.19    3.21
  -2  -1  -4   61.52    3.77
  -2   1  -4   79.48    3.98
  -2   1  -4   71.27    3.80
   2   1   4   83.08    4.10
  -1   0   5   35.20    3.21
   1   0  -5   30.73    3.32
  -1   0   5   31.56    2.81
   1   0  -5   33.97    2.41
   1   0  -5   33.04    3.02
  -1   0   5   37.25    4.10
  -1   0   5   34.22    2.66
   1   0  -5   32.89    2.62
   4   1  -2  164.04    6.89
   4   1  -2  173.78    6.63
  -4   1   2  162.17    6.01
   4  -1  -2  156.82    5.98
  -4   1   2  165.69    6.19
   4   1  -2  150.01    7.43
   4  -1  -2  151.45    7.29
  -4  -1   2  154.45    6.09
  -4   1   2  148.56    7.28
  -4  -1   2  154.20    8.21
  -1   0  -5    6.41    1.29
  -1   0  -5    5.61    1.18
   1   0   5    4.52    3.15
   1   0   5    5.19    1.16
  -1   0  -5    6.51    0.74
   1   0   5    5.72    1.25
   1   0   5    5.67    0.83
  -4   1  -2   16.35    1.47
   4  -1   2   27.60    2.48
   4   1   2   36.44    3.83
   4   1   2   16.60    1.66
   4   1   2   16.28    1.33
   4  -1   2   16.46    1.48
   4  -1   2   18.11    1.64
  -4  -1  -2   17.64    1.58
   5   0  -1    1.22    0.44
  -5   0   1    2.07    2.06
   5   0  -1    1.27    0.40
  -5   0   1    1.42    0.40
   5   0   1   50.92    3.43
  -5   0  -1   52.89    4.81
   5   0   1   53.36    3.63
  -5   0  -1   50.64    3.47
   0   2  -2  113.18    4.78
   0   2  -2  119.48    4.94
   0  -2  -2   78.66    8.51
   0  -2   2  100.17    4.95
   0   2  -2  145.64   10.41
   0   2   2  103.59    7.79
   0   2   2  108.67    4.47
   0   2  -2  100.22    4.87
   0   2  -2  115.42    6.90
   0   2   2  139.51    8.12
   0   2   2  153.91    6.72
   0  -2   2  145.07   11.76
   0  -2  -2  105.70    4.47
   2   2   0 1437.94   50.41
   2  -2   0 1397.97   49.17
   2   2   0 1370.00   48.43
  -2   2   0 1465.94   51.35
   2   2   0 1456.52   51.87
   2  -2   0 1349.95   49.31
  -2   2   0 1449.85   50.80
   2   2   0 1288.02   46.74
   2  -2   0 1442.53   50.66
  -2  -2   0 1387.47   50.74
   2  -2   0 1244.49   45.21
   1   2  -2  636.52   23.54
  -1   2   2  690.67   25.53
  -1   2   2  645.28   22.96
  -1  -2   2  628.81   22.62
  -1  -2   2  686.24   27.27
   1   2  -2  629.23   22.59
  -1  -2   2  658.97   24.12
  -1   2   2  625.60   22.50
  -1  -2   2  617.53   24.88
   1   2  -2  721.92   27.69
   1   2  -2  664.99   25.16
   1  -2   2  241.14   29.17
  -1   2  -2  187.14   24.45
   1   2   2  228.36   17.90
  -1   2  -2  248.74    9.97
   1   2   2  233.93   10.23
  -1   2  -2  230.64    8.77
   1   2   2  224.07    8.70
  -1  -2  -2  210.68   13.44
   1  -2   2  233.24   16.91
  -1  -2  -2  192.76   15.70
  -2   2  -1 2873.59  100.46
   2  -2   1 2910.07  101.73
   2   2   1 2760.19   97.77
  -2  -2  -1 2616.86   93.44
  -2   2  -1 3046.81  105.92
   2   2   1 2892.60  100.65
   2  -2   1 2766.77   97.10
   2   2   1 2804.12   97.61
   2  -2   1 2842.40   99.18
  -2  -2  -1 2861.06  101.42
   2   2   1 2926.85  102.55
   2   2   1 2926.31  102.09
  -2   2  -1 2993.40  104.08
  -2   0   5   -0.18    0.49
   2   0  -5   -0.11    0.28
  -2   0   5   -0.34    0.74
  -2   0   5    0.30    1.21
  -2   0   5    0.54    1.63
   2   0   5    0.20    0.95
  -2   0  -5   -0.16    1.02
   2   0   5   -0.16    1.06
  -2   0  -5   -0.16    1.03
   2   0   5   -0.03    0.89
  -5   0   2   -0.38    1.75
  -5   0   2    0.13    0.33
   5   0  -2   -0.00    0.35
   5   0  -2   -0.02    0.38
   5   0   2   -0.03    0.44
  -5   0  -2   -0.02    0.33
  -5   0  -2    0.03    0.30
   5   0   2   -0.15    0.36
   0   1  -5  247.58    9.99
   0   1   5  271.88    9.94
   0  -1  -5  269.77    9.84
   0  -1   5  291.91   11.54
   0   1  -5  290.14   10.92
   0  -1  -5  275.00   10.81
   0   1  -5  272.08   10.82
   0   1   5  265.14   10.54
   0   1   5  298.55   10.88
   0  -1  -5  253.38    9.80
   0  -1   5  252.58   11.74
   0  -1   5  285.09   10.65
   0   1   5  236.76   10.97
   0   1  -5  295.45   13.18
   3   1  -4   18.86    1.63
  -3  -1   4   21.53    1.89
   3  -1  -4   22.77    8.93
  -3  -1   4   19.61    2.14
  -3   1   4   16.97    1.37
   3   1  -4   18.58    2.05
  -3   1   4   26.39    9.39
  -3   1   4   18.16    1.39
   3  -1  -4   15.76    3.62
  -4   1   3 2275.11   79.02
  -4   1   3 2442.57   84.70
  -4  -1   3 2229.04   77.70
  -4  -1   3 2273.52   80.78
   4  -1  -3 2200.50   77.82
   4   1  -3 2232.16   78.86
  -4   1   3 2094.67   74.38
  -4  -1   3 2283.86   80.20
   4  -1  -3 2257.23   78.50
   4   1  -3 2239.73   78.62
  -3  -1  -4 1203.46   42.47
   3   1   4 1127.93   39.75
   3  -1   4 1214.95   42.87
  -3   1  -4 1230.25   43.76
   3   1   4 1016.98   36.55
   3   1   4 1192.46   41.78
  -3   1  -4 1143.66   40.30
  -3   1  -4 1150.05   40.32
   3   1   4 1211.02   43.12
  -4   1  -3  227.12    9.32
   4   1   3  298.73   12.47
   4   1   3  267.40   11.09
   4   1   3  252.69    9.24
  -4   1  -3  237.68    9.28
   4  -1   3  239.45   10.77
   4  -1   3  237.58    9.99
  -4  -1  -3  247.64    9.34
   4  -1   3  221.43    9.55
  -5  -1   0   21.08    1.76
  -5  -1   0   21.38    2.24
   5   1   0   21.21    1.90
   5   1   0   23.92    1.89
  -5   1   0   21.39    1.75
   5  -1   0   20.80    1.91
  -5   1   0   30.93    3.42
  -5  -1   0   36.40    4.44
   5  -1   0   21.85    1.80
   5  -1   0   30.51    3.51
   5   1   0   30.62    3.77
  -2   2   2    2.51    0.63
   2   2  -2    2.32    0.72
  -2  -2   2    2.03    2.13
   2   2  -2    3.00    0.84
   2   2  -2    3.67    1.34
  -2   2   2    3.82    1.57
  -2   2   2    2.85    0.69
  -2  -2   2    3.73    1.71
   2   2  -2    2.62    1.18
  -2   2  -2   38.00    3.13
   2   2   2   38.77    2.89
   2   2   2   38.85    2.90
   2  -2   2   36.81    2.80
   2   2   2   38.75    3.00
   2  -2   2   39.37    2.98
   2  -2   2   38.19    3.31
  -2   2  -2   35.97    2.73
   2   2   2   40.82    3.40
   2   2   2   34.07    3.47
   1   1  -5  114.50    4.91
   1  -1  -5  113.50    5.23
   1   1  -5  124.31    5.73
  -1   1   5  118.68    5.53
  -1  -1   5  106.17    5.24
  -1  -1   5  123.41    5.64
  -1   1   5  116.44    4.60
   1  -1  -5  115.09    4.47
  -1  -1   5  114.38    6.58
   1   1  -5  120.93    6.45
  -1   1   5  113.05    5.97
   1   1  -5  112.12    4.65
   1  -1  -5  121.55    5.00
  -1   1   5  115.78    4.41
  -1   1  -5   73.46    5.41
   1   1   5   70.83    2.99
   1  -1   5   72.31    3.78
  -1  -1  -5   71.21    2.94
  -1  -1  -5   60.11    3.26
  -1   1  -5   62.32    3.49
   1   1   5   66.77    3.49
   1  -1   5   68.47    3.07
  -1   1  -5   68.92    3.10
   1   1   5   59.47    3.07
   1   1   5   77.17    3.51
  -1   1  -5   72.80    3.73
   1  -1   5   91.06    7.53
   1   1   5   64.17    4.81
  -1  -1  -5   71.95    4.72
  -5  -1   1   24.00    2.35
   5  -1  -1   25.69    1.91
  -5   1   1   24.51    3.13
   5   1  -1   25.50    2.23
   5   1  -1   28.76    3.39
   5  -1  -1   23.80    1.84
   5  -1  -1   24.55    3.05
  -5  -1   1   28.23    3.60
  -5  -1   1   24.44    1.94
   5   1  -1   24.48    1.84
  -5   1   1   27.12    1.94
  -4   0   4  983.26   36.92
  -4   0   4 1078.34   37.73
   4   0  -4  961.11   33.62
   4   0  -4  894.33   31.54
  -4   0   4  888.43   31.57
   5   1   1   27.78    2.28
  -5   1  -1   23.75    1.75
  -5  -1  -1   26.83    2.54
  -5  -1  -1   32.27    3.71
   5   1   1   34.18    3.79
   5  -1   1   26.64    2.01
  -5   1  -1   26.13    1.96
   5  -1   1   27.47    2.14
   5   1   1   26.66    1.98
   5  -1   1   29.29    3.41
  -4   0  -4 1365.01   47.55
   4   0   4 1373.40   47.95
   4   0   4 1375.10   48.32
   4   0   4 1412.28   50.06
   0   2  -3  458.12   17.38
   0  -2   3  442.13   17.02
   0  -2  -3  439.28   16.21
   0   2   3  452.15   16.27
   0   2  -3  461.79   17.44
   0  -2   3  442.39   16.13
   0   2   3  455.50   17.00
   0   2   3  449.86   16.31
   0   2  -3  438.68   18.25
   0  -2  -3  443.93   16.83
   3  -2   0   36.22    3.26
  -3  -2   0   35.63    4.77
   3   2   0   25.74    2.23
   3  -2   0   23.11    2.05
  -3   2   0   21.39    2.97
   3   2   0   21.12    2.24
  -3  -2   0   18.95    2.05
   3   2   0   33.57    4.27
  -3   2   0   22.34    1.79
   3  -2   0   24.36    2.06
   3   2   0   21.16    1.81
  -1   2  -3  310.03   12.09
  -1   2  -3  282.05   11.20
   1   2   3  302.46   11.16
  -1  -2  -3  292.47   10.96
  -1   2  -3  343.53   15.95
   1   2   3  245.19   11.46
   1  -2   3  308.06   11.59
  -1  -2  -3  293.94   11.05
   1   2   3  287.80   11.20
   1  -2   3  294.54   11.89
   1   2   3  329.72   12.31
  -3  -2   1  175.68    9.44
   3   2  -1  180.53    8.63
   3   2  -1  191.25    7.36
   3   2  -1  180.72    7.66
  -3   2   1  183.09    6.97
   3  -2  -1  187.31    7.27
  -3  -2   1  163.67    7.63
   3  -2  -1  188.68    8.49
  -3   2   1  177.20    6.88
  -3  -2   1  166.39    7.23
   3   2  -1  170.90    6.84
  -3   2   1  147.51    7.55
   3   2   1  199.37    8.34
   3   2   1  228.16    8.83
   3  -2   1  236.36    9.32
   3   2   1  239.24    9.10
   3  -2   1  222.51    8.99
   3   2   1  242.18   10.77
  -3  -2  -1  243.61   10.94
  -3   2  -1  233.42    8.81
   3  -2   1  239.40    9.12
  -3   2  -1  236.92    9.08
  -3   0   5  370.86   13.87
   3   0  -5  373.57   13.36
  -3   0   5  377.27   13.58
  -3   0   5  396.83   27.73
  -3   0  -5   -0.04    0.20
  -5   0   3 3176.50  112.02
  -5   0   3 3281.73  114.16
   5   0  -3 3355.08  116.40
  -5   0   3 3481.77  120.68
   5   0   3  746.69   27.00
   5   0   3  636.43   31.82
   5   0   3  741.52   26.09
  -5   0  -3  758.99   26.68
   2   1  -5  132.32    6.00
   2  -1  -5  138.81    6.21
   2  -1  -5  136.13    5.33
  -2   1   5  142.04    6.46
  -2  -1   5  134.89    5.61
  -2  -1   5  128.04    6.91
  -2   1   5  132.97    5.13
   2  -1  -5  129.67    4.98
  -2   1   5  140.77    5.26
   2   1  -5  130.61    5.32
  -2  -1   5  133.13    5.94
  -2  -1   5  140.61    6.55
   2   1   5   43.53    3.06
   2   1   5   47.69    3.46
   2   1   5   53.69    3.80
   2  -1   5   46.40    3.57
  -2   1  -5   46.87    3.49
  -2   1  -5   44.50    3.71
  -2   1  -5   53.05    4.13
   2   1   5   55.62    4.26
  -2  -1  -5   44.10    4.67
  -2   1  -5   48.25    5.43
  -2  -1  -5   45.21    3.20
   5   1  -2  136.85    6.79
  -5   1   2  146.33    5.51
  -5   1   2  141.11    5.28
   5   1  -2  142.09    5.93
  -5  -1   2  136.22    5.38
   5   1  -2  141.62    5.45
  -5   1   2  135.16    6.83
  -5  -1   2  140.43    7.22
   5  -1  -2  141.57    5.43
   5  -1  -2  126.97    6.32
   5   1   2  212.14    8.03
  -5   1  -2  208.74    7.82
   5  -1   2  214.39    8.16
   5   1   2  209.01    9.44
  -5  -1  -2  208.85    7.89
   5  -1   2  202.32    9.23
   5   1   2  221.71    8.16
   5  -1   2  214.76    7.98
  -5  -1  -2  215.74    9.72
   0   0   6  239.79    9.60
   0   0  -6  242.53    8.95
   0   0  -6  230.98    8.97
   0   0  -6  246.64    9.90
   0   0   6  227.72    9.21
   0   0   6  225.92   10.65
   6   0   0  162.45    5.90
   6   0   0  167.65    6.13
  -6   0   0  158.53    5.96
  -6   0   0  169.57    8.25
  -6   0   0  169.46    6.17
   2   2  -3   33.87    2.58
  -2   2   3   36.59    1.88
   2   2  -3   35.43    2.43
  -2  -2   3   37.91    2.69
  -2  -2   3   31.64    2.89
  -2  -2   3   34.93    3.66
   2   2  -3   32.51    2.82
   2  -2  -3   33.80    1.94
  -2   2   3   34.83    2.50
  -2   2   3   35.68    1.75
   2   2   3  149.00    6.02
   2  -2   3  149.32    5.88
   2  -2   3  139.93    6.18
  -2  -2  -3  145.69    7.20
  -2  -2  -3  140.10    5.58
   2   2   3  152.14    5.87
   2   2   3  139.17    6.70
  -2   2  -3  148.29    6.26
   2   2   3  144.06    6.07
   2   2   3  151.67    5.88
  -3  -2   2   28.97    2.93
  -3   2   2   29.24    2.73
  -3   2   2   26.00    1.42
   3   2  -2   25.17    2.09
   3  -2  -2   25.84    1.57
   3   2  -2   27.32    1.74
   3   2  -2   30.01    2.67
   3   2  -2   26.14    1.59
  -3  -2   2   28.83    2.74
  -3   2   2   26.41    1.46
   3   2   2    1.23    1.87
   3   2   2    1.15    0.68
   3  -2   2    0.99    0.68
   3  -2   2    2.60    1.04
  -3   2  -2    2.54    0.96
   3   2   2    1.60    1.12
   3   2   2    1.47    0.60
   3  -2   2    1.08    0.71
   1   0  -6   -0.45    1.10
   1   0  -6   -0.07    0.27
  -1   0   6   -0.14    0.58
  -1   0   6   -0.65    2.10
   1   0  -6   -0.01    0.69
  -1   0   6    0.05    0.98
  -1   0   6   -0.04    1.24
  -1   0  -6   -0.30    0.64
  -1   0  -6   -0.07    0.34
   1   0   6    0.07    1.06
  -1   0  -6   -0.17    0.54
   1   0   6   -0.08    0.96
   1   0   6    0.78    2.69
  -1   0  -6    0.71    1.07
   6   0  -1   -0.12    0.35
  -6   0   1    0.01    0.48
   6   0  -1    0.03    0.35
  -6   0   1    0.11    0.34
  -6   0   1   -0.39    1.70
   6   0   1    0.09    0.34
   6   0   1   -0.01    0.35
  -6   0  -1   -0.31    1.84
  -6   0  -1    0.05    0.37
   4  -1  -4   18.84    1.10
   4  -1  -4   21.32    1.21
   4   1  -4   25.09    1.41
  -4  -1   4   30.91    1.80
  -4   1   4   24.04    1.19
  -4  -1   4   28.95    2.14
   4   1  -4   29.96    2.11
  -4   1   4   20.23    1.14
  -4   1  -4  917.16   30.43
   4   1   4  944.63   31.18
  -4   1  -4  895.92   31.22
  -4  -1  -4  935.24   31.23
   4  -1   4  853.01   30.13
   4  -1   4  963.90   32.44
  -4   1  -4  893.09   31.33
   4   1   4  900.96   31.59
   4  -1   4  929.79   31.47
   0  -2   4   41.93    2.16
   0   2   4   41.76    3.30
   0  -2   4   39.58    2.78
   0   2  -4   43.98    4.09
   0   2   4   40.17    2.52
   0   2   4   40.83    2.09
   0   2  -4   44.01    2.30
   0  -2  -4   41.73    2.21
   0  -2  -4   41.89    2.16
   0  -2   4   52.18    5.70
   0   2  -4   42.76    2.75
   0  -2  -4   40.35    2.46
   0  -2   4   44.55    2.78
   0   2   4   42.71    1.98
  -4   2   0    7.83    0.83
   4  -2   0    8.15    0.98
   4   2   0    7.64    0.89
   4  -2   0    8.24    0.90
  -4   2   0    8.43    0.84
   4   2   0    8.35    1.38
  -4  -2   0    8.16    1.39
   4   2   0    8.71    2.16
  -4  -2   0    8.72    2.19
   3   1  -5  137.64    5.93
   3  -1  -5  129.08    5.80
  -3   1   5  133.94    5.05
   3   1  -5  128.75    5.83
  -3   1   5  128.53    5.98
   3  -1  -5  132.67    5.00
   3   1  -5  130.74    5.10
  -3  -1   5  142.48    5.71
  -3   1   5  145.24    5.29
  -3  -1   5  141.59    6.54
  -3  -1   5  137.16    5.95
  -2   0   6  340.47   12.21
   2   0  -6  323.70   11.36
  -2   0   6  365.94   14.10
  -2   0   6  325.51   12.17
   2   0  -6  337.48   12.14
  -2   0   6  345.99   13.98
  -3  -1  -5  127.77    7.83
  -5   1   3   10.77    0.74
  -5   1   3   16.57    2.22
   5   1  -3   13.08    1.33
  -5   1   3   11.63    0.84
  -5  -1   3   12.15    0.99
   5  -1  -3   10.75    0.84
   5   1  -3   16.89    2.30
  -5  -1   3   15.75    2.56
   5  -1  -3   18.03    2.16
  -2   0  -6  282.72   10.92
  -2   0  -6  289.39   11.13
   2   0   6  256.38    9.44
   2   0   6  276.00   10.75
   2   0   6  270.60   10.55
   5   1   3    8.82    0.68
  -5   1  -3    8.11    0.73
   5  -1   3    7.61    0.94
   5  -1   3   11.86    1.40
   5   1   3   17.61    2.47
   5   1   3    8.13    0.69
   5  -1   3    8.37    1.03
  -5  -1  -3    8.65    0.86
  -5   1  -3    7.81    1.04
  -6   0   2  409.17   14.24
   6   0  -2  384.46   13.37
  -6   0   2  387.40   15.49
   6   0  -2  408.67   14.43
   1   2  -4  115.53    6.36
  -1  -2   4   95.67    6.02
   1  -2  -4  107.65    4.37
  -1   2   4  109.45    5.05
   1   2  -4  105.55    4.34
   1  -2  -4  109.41    4.91
  -1  -2   4  109.95    5.42
   1   2  -4  110.84    5.16
   1  -2  -4  102.30    4.30
  -1   2   4  110.38    4.43
  -1   2   4  113.98    4.37
   1   2  -4  110.39    5.14
  -1  -2   4  117.45    5.35
   6   0   2  477.32   16.68
   6   0   2  499.23   17.23
  -6   0  -2  477.81   16.62
  -6   0  -2  482.86   16.71
   1   2   4  106.42    4.42
   1   2   4   95.72    5.95
  -1  -2  -4  107.00    4.43
  -1  -2  -4  105.54    4.39
  -1   2  -4  112.59    5.12
   1  -2   4  105.94    5.11
   1   2   4  103.57    4.74
  -1   2  -4   97.11    6.23
   1  -2   4  110.84    4.59
  -1   2  -4  103.48    4.31
   1   2   4  108.75    4.27
   4   2  -1   84.87    3.69
  -4  -2   1   81.65    3.69
  -4   2   1   83.84    3.42
   4   2  -1   82.47    4.15
  -4   2   1   84.63    3.40
  -4  -2   1   76.03    3.99
  -4   2   1   79.98    4.68
   4   2  -1   76.99    4.61
   4  -2  -1   75.25    3.30
  -4  -2   1   80.62    5.20
   4  -2  -1   85.47    3.64
   4   2   1  106.73    4.93
   4  -2   1  109.08    4.93
   4   2   1  109.31    5.94
  -4  -2  -1  113.80    6.22
  -4  -2  -1  111.89    5.15
  -4   0   5    0.15    1.15
  -4   0   5    0.17    0.44
  -4   0   5    0.16    0.80
   4   0  -5    0.25    0.49
   4   0  -5   -0.03    0.31
  -5   0   4   -0.08    0.63
  -5   0   4   -0.24    0.36
   5   0  -4   -0.03    0.33
  -5   0   4   -0.19    1.55
   5   0  -4   -0.11    0.43
   4   0   5   -0.07    0.82
  -4   0  -5    0.31    0.86
  -4   0  -5    0.09    0.28
   4   0   5   -0.03    0.33
  -4   0  -5   -0.42    0.98
   5   0   4    0.11    0.33
   5   0   4   -0.01    0.71
  -5   0  -4   -0.03    0.28
   5   0   4   -0.20    0.47
   3  -2   3  110.15    5.05
  -3   2  -3   75.40    3.31
   3   2   3   88.16    3.77
   3  -2   3   89.71    3.83
   3   2   3   91.16    3.96
   3   2   3  120.08    6.13
  -3  -2  -3  136.54    9.24
   3   2   3   85.66    3.64
   3   2   3   87.12    4.30
  -3   2  -3  111.73    4.97
   3  -2   3   86.54    3.74
   0   1  -6  123.60    5.14
   0   1   6  115.30    4.30
   0   1   6  113.26    4.54
   0  -1  -6  114.46    4.40
   0   1   6  120.76    6.85
   0   1  -6  127.27    7.00
   0  -1   6  101.53    6.10
   0  -1  -6  109.97    5.74
   0   1   6  120.57    5.53
   0   1  -6  111.41    5.20
   0  -1   6  110.56    5.12
   0  -1  -6  100.64    4.44
   0   1  -6  125.50    5.67
   0  -1  -6  117.04    5.28
   0   1  -6  103.28    4.44
   6  -1   0  267.65    9.66
   6   1   0  262.55    9.58
  -6   1   0  264.41    9.38
   6  -1   0  262.48    9.34
   6   1   0  277.45   11.75
  -6   1   0  266.20   11.29
  -6  -1   0  250.67    9.78
   6   1   0  274.50    9.74
  -6  -1   0  268.64   11.61
  -6   1   0  279.67    9.83
   6  -1   0  263.26   11.39
  -1  -1   6   57.24    3.22
  -1   1   6   54.76    2.23
   1  -1  -6   55.69    2.71
   1   1  -6   53.69    2.55
   1  -1  -6   52.29    3.06
  -1   1   6   55.13    3.30
  -1  -1   6   55.31    3.44
   1   1  -6   55.25    3.96
  -1   1   6   57.64    4.18
   1   1  -6   57.06    3.37
   1   1  -6   55.13    2.71
   1   1  -6   55.96    3.20
  -1   1   6   55.43    2.50
   1  -1  -6   58.82    2.47
  -1  -1   6   56.93    4.47
   1   1   6  112.50    4.62
  -1   1  -6  122.06    5.40
  -1   1  -6  117.88    6.87
   1   1   6  100.61    6.13
  -1  -1  -6  112.05    4.29
   1  -1   6  148.03    9.37
   1  -1   6  117.05    5.35
   1   1   6  120.91    5.38
  -1   1  -6  108.53    4.44
   1  -1   6  109.06    4.44
  -1  -1  -6  115.28    6.28
   1   1   6  112.73    4.54
  -1   1  -6  105.64    4.95
   1   1   6  120.24    4.69
  -1  -1  -6  115.35    5.15
   6  -1  -1  164.77    7.78
  -6  -1   1  178.18    8.47
  -6  -1   1  176.07    6.57
   6  -1  -1  181.92    6.61
  -6  -1   1  165.69    6.89
  -6   1   1  167.91    8.06
   6   1  -1  174.82    8.09
  -6   1   1  182.02    6.54
   6   1  -1  187.80    6.86
   6   1  -1  169.40    6.52
   6  -1  -1  173.55    6.44
   6   1   1    1.49    2.15
  -6   1  -1    1.00    0.46
   6  -1   1    1.16    0.58
   6   1   1    1.30    0.44
   6  -1   1    3.53    1.89
   6  -1   1    1.17    0.52
  -6  -1  -1    4.10    2.36
  -6  -1  -1    1.29    1.05
   6   1   1    0.83    0.47
  -2   2   4   37.73    2.66
   2   2  -4   36.32    2.69
   2   2  -4   35.47    2.99
   2   2  -4   35.55    1.90
   2  -2  -4   36.83    2.40
   2  -2  -4   36.61    2.06
  -2  -2   4   38.24    3.11
  -2   2   4   39.82    1.93
  -2  -2   4   40.71    2.68
   2   2  -4   38.64    2.51
  -2   2   4   40.25    1.85
  -2  -2   4   34.76    3.52
   2  -2  -4   37.22    1.90
   2   2   4  409.85   14.65
   2   2   4  400.44   14.80
   2   2   4  390.54   14.15
   2   2   4  408.35   14.40
   2  -2   4  440.79   15.80
  -2   2  -4  530.19   22.90
  -2   2  -4  388.88   13.91
  -2  -2  -4  403.59   14.50
  -2   2  -4  406.41   14.99
  -2   2  -4  401.04   14.29
   2  -2   4  383.58   14.44
  -2  -2  -4  388.01   15.37
  -4   2   2   53.30    2.30
  -4  -2   2   64.09    3.07
   4   2  -2   66.28    3.99
  -4   2   2   55.89    2.43
  -4   2   2   67.98    4.42
  -4  -2   2   65.59    4.31
   4  -2  -2   56.90    2.61
   4   2  -2   60.30    2.86
   4   2  -2   59.19    3.35
   4  -2   2    7.12    0.96
   4   2   2   13.75    2.77
   4  -2   2    6.92    1.16
  -4  -2  -2    6.88    1.03
   4   2   2    7.01    0.89
   4  -2   2    6.30    0.86
   4   2   2    6.02    1.14
  -4  -2  -2   14.41    2.74
   3   0  -6    0.07    0.27
  -3   0   6   -0.01    0.44
  -3   0   6   -0.78    1.24
  -3   0   6    0.09    1.41
  -3   0   6   -0.05    0.82
  -3   0  -6    0.12    0.81
  -3   0  -6   -0.03    1.06
   3   0   6   -0.11    0.98
   3   0   6    0.17    0.43
   6   0  -3   -0.00    0.40
  -6   0   3    0.13    0.39
  -6   0   3   -1.06    1.58
   6   0   3   -0.23    0.38
   6   0   3   -0.02    0.32
  -6   0  -3    0.11    0.30
  -6   0  -3   -0.05    0.32
  -2   1   6   83.77    4.31
   2   1  -6   91.19    4.48
   2  -1  -6   79.31    3.29
   2  -1  -6   84.29    4.21
  -2   1   6   79.43    4.54
  -2   1   6   80.55    3.11
  -2  -1   6   87.99    4.63
   2   1  -6   73.91    3.34
   2  -1  -6   85.14    3.36
  -2   1   6   81.95    3.38
  -2  -1   6   89.29    5.53
  -2  -1   6   87.05    4.25
   2   1   6   18.06    1.11
  -2  -1  -6   16.91    1.09
   2   1   6   18.66    1.41
   2   1   6   17.40    1.47
  -2   1  -6   17.89    1.34
  -2   1  -6   21.60    1.96
   2  -1   6   18.79    1.53
  -2  -1  -6   20.73    3.10
   2  -1   6   18.25    1.71
  -2   1  -6   18.12    1.77
   2   1   6   21.53    1.82
  -2   1  -6   19.64    3.49
  -6   1   2  108.03    4.05
   6  -1  -2  109.78    4.23
  -6  -1   2  103.39    4.12
   6   1  -2  110.24    4.57
  -6  -1   2   98.67    4.60
  -6   1   2  102.86    5.71
   6   1  -2  107.98    4.14
   6  -1  -2  105.41    5.56
   6   1  -2  105.68    5.61
  -6  -1   2  106.83    5.87
   6   1   2  112.40    4.35
  -6  -1  -2  118.32    6.23
   6   1   2  112.51    6.09
   6   1   2  112.09    4.24
   6  -1   2  110.34    4.44
   6  -1   2  109.25    5.89
  -6  -1  -2  108.95    5.02
  -6  -1  -2  103.90    4.14
  -6   1  -2  108.95    4.21
   6  -1   2  108.77    4.18
   4   1  -5  403.90   14.24
  -4   1   5  439.63   15.33
   4   1  -5  454.26   16.52
  -4  -1   5  433.65   15.95
  -4   1   5  426.52   14.75
  -4  -1   5  486.41   17.23
   4  -1  -5  454.53   15.82
   4  -1  -5  430.02   16.14
   4   1  -5  445.42   16.66
  -4   1   5  426.29   16.30
  -4  -1   5  448.74   17.28
  -5   1   4  342.18   12.02
   5  -1  -4  316.23   12.52
   5  -1  -4  344.72   12.08
   5   1  -4  335.16   13.20
  -5  -1   4  336.68   12.69
  -5   1   4  327.92   13.25
  -5   1   4  326.41   11.39
   5  -1  -4  354.01   12.42
   5   1  -4  354.84   13.01
  -5  -1   4  328.93   11.80
  -5  -1   4  341.56   14.10
   4  -1   5  134.71    5.83
  -4   1  -5  140.25    5.51
   4  -1   5  148.06    5.76
  -4   1  -5  160.93    6.68
   4   1   5  157.12    6.55
  -4   1  -5  135.29    5.96
  -4  -1  -5  148.43    5.84
   4   1   5  145.40    5.35
  -4   1  -5  141.89    5.27
   5  -1   4   27.04    2.06
  -5  -1  -4   10.84    1.49
   5   1   4   12.38    0.90
  -5   1  -4    7.48    0.75
  -5  -1  -4   14.56    1.09
   5   1   4   11.85    0.77
  -5   1  -4    9.75    1.11
   5  -1   4   14.11    1.22
   5  -1   4   11.23    1.24
   0   2  -5   29.70    2.33
   0  -2   5   34.73    5.16
   0  -2  -5   29.00    2.07
   0   2   5   27.20    3.00
   0   2  -5   28.13    3.16
   0  -2   5   29.36    2.57
   0   2   5   30.48    2.27
   0  -2  -5   24.02    1.47
   0  -2   5   23.95    1.50
   0  -2   5   25.37    2.07
   0  -2  -5   23.61    1.65
   0   2   5   24.42    1.31
   0   2  -5   25.43    1.65
   0   2   5   25.65    1.56
  -3  -2   4  300.47   12.72
   3  -2  -4  321.09   12.27
  -3  -2   4  297.39   12.07
  -3   2   4  306.53   10.84
   3   2  -4  282.85   11.10
  -3   2   4  319.01   12.45
  -3  -2   4  304.19   11.72
   3  -2  -4  317.45   11.54
  -3   2   4  327.65   11.51
   3   2  -4  325.11   12.41
   3   2  -4  286.55   10.42
   4   2  -3    8.27    1.45
  -4  -2   3   15.74    3.74
   4  -2  -3   18.65    1.96
   4  -2  -3    7.61    0.84
  -4   2   3   17.18    2.11
   4   2  -3   17.86    2.53
  -4  -2   3   14.87    2.06
   4  -2  -3    8.54    0.92
  -4   2   3    7.10    0.68
  -4  -2   3   10.15    1.15
  -4   2   3    5.84    0.67
   3  -2   4  311.97   11.93
  -3   2  -4  333.47   12.52
   3   2   4  319.95   12.04
  -3   2  -4  327.95   11.79
  -3   2  -4  312.74   11.34
  -3  -2  -4  292.33   12.86
   3   2   4  335.27   12.05
   3   2   4  316.17   12.03
   3   2   4  307.10   12.49
   3   2   4  325.21   11.66
   3  -2   4  318.17   11.55
   3   2   4  336.27   12.30
   4  -2   3   63.24    3.91
   4   2   3   61.25    3.36
   4  -2   3   64.15    2.97
   4   2   3   62.46    2.85
  -4   2  -3   58.14    2.88
   4   2   3   65.70    3.09
   4  -2   3   68.21    3.49
   4   2   3   67.83    4.65
  -4   2  -3   68.64    3.44
  -4  -2  -3   61.41    3.00
  -4   2  -3   61.38    2.81
   5  -2   0  173.77    6.60
   5  -2   0  163.17    7.88
   5   2   0  171.50    6.50
   5  -2   0  169.84    6.49
  -5   2   0  163.36    6.00
  -5  -2   0  167.94    7.13
   5   2   0  160.04    7.55
   5   2   0  168.96    7.09
  -5  -2   0  147.95    7.44
   0   0  -7    0.30    0.71
   0   0  -7    0.19    0.81
   0   0   7    0.44    1.01
   0   0  -7   -0.00    0.39
   0   0   7    1.21    2.34
   0   0  -7   -0.53    0.54
   0   0   7   -0.00    0.82
  -1   2   5    8.96    0.83
   1   2  -5    8.03    1.04
   1  -2  -5    8.14    0.83
   1  -2  -5    8.31    0.93
  -1  -2   5    8.10    2.51
  -1   2   5    9.83    1.75
  -1  -2   5   10.66    1.68
  -1  -2   5    8.14    1.38
  -1   2   5    9.69    1.32
   1   2  -5    9.72    2.28
   1   2  -5   10.16    1.50
  -1   2   5    7.77    0.64
   1   2  -5    8.47    0.90
   1  -2  -5   10.18    1.30
   1  -2   5   30.89    1.78
   1  -2   5   29.24    2.37
  -1   2  -5   27.89    1.64
   1   2   5   29.46    1.70
   1   2   5   29.50    2.12
  -1  -2  -5   31.30    1.82
  -1   2  -5   32.40    3.41
   1   2   5   32.56    1.58
  -1  -2  -5   31.31    1.79
  -1  -2  -5   28.35    2.05
   1   2   5   27.57    3.22
  -1   2  -5   30.85    2.23
   7   0   0    0.04    0.34
   7   0   0   -0.14    0.35
  -7   0   0   -0.37    1.81
  -7   0   0   -0.04    0.40
  -7   0   0   -0.17    0.31
   5   2  -1   10.32    0.92
   5  -2  -1   10.39    0.93
  -5   2   1   10.69    0.89
   5   2  -1   10.48    1.33
   5  -2  -1   10.81    0.95
  -5  -2   1   10.11    1.15
  -5   2   1   11.27    0.81
   5  -2  -1    9.76    1.68
   5   2  -1   10.81    2.13
  -5   2   1   11.42    1.92
  -5  -2   1   10.03    1.50
   5   2   1   79.00    4.87
  -5   2  -1   79.39    3.19
   5  -2   1   74.75    4.71
  -5  -2  -1   77.87    4.02
   5  -2   1   81.42    3.50
   5   2   1   78.08    3.94
  -5  -2  -1   70.40    4.50
   5   2   1   79.73    3.40
   5  -2   1   70.41    3.53
   5  -2   1   76.58    3.37
  -5  -2  -1   77.13    3.52
  -1   0   7  142.96    7.47
  -1   0   7  135.64    5.85
  -1   0   7  137.36    6.10
   1   0  -7  115.97    5.29
   1   0  -7  136.35    5.06
   1   0  -7  144.24    5.69
  -1   0   7  134.92    5.48
   1   0   7   32.32    4.08
  -1   0  -7   33.64    2.33
  -1   0  -7   28.61    1.50
   1   0   7   31.78    2.26
   1   0   7   32.30    2.36
  -1   0  -7   32.03    1.50
  -1   0  -7   30.49    1.97
  -5   0   5   73.16    2.97
  -5   0   5   67.07    3.14
   5   0  -5   79.68    3.26
   5   0  -5   73.94    2.93
  -5   0   5   78.07    4.53
   5   0   5   83.20    3.25
   5   0   5   86.97    4.16
  -5   0  -5   86.52    3.36
   7   0  -1   31.77    1.48
   7   0  -1   32.68    1.56
  -7   0   1   29.54    1.61
  -7   0   1   31.26    3.10
  -7   0   1   35.15    1.64
   7   0   1   22.55    1.16
   7   0   1   22.21    1.21
  -7   0  -1   22.00    1.27
  -7   0  -1   29.26    3.03
   3  -1  -6  101.95    3.93
   3   1  -6  100.77    4.06
  -3  -1   6   96.44    5.52
  -3   1   6  100.00    3.79
  -3  -1   6  103.03    4.78
  -3   1   6   98.95    3.94
  -3  -1   6  112.50    5.49
   3   1  -6  113.24    5.30
   3  -1  -6  107.09    5.03
   3  -1  -6   96.47    3.78
  -3   1   6  109.46    5.26
  -3  -1   6  103.77    4.41
   3   1   6   70.54    3.66
  -3  -1  -6   65.68    2.95
  -3   1  -6   69.65    3.69
   3   1   6   77.52    3.87
  -3   1  -6   84.70    6.67
  -3  -1  -6   65.79    4.95
  -3   1  -6   74.98    3.75
   3  -1   6   69.85    3.28
  -3   1  -6   70.35    3.22
  -3   1  -6   70.99    3.04
   3   1   6   71.16    2.82
  -6  -1   3   45.48    3.81
   6  -1  -3   46.01    3.27
  -6   1   3   44.89    3.41
   6   1  -3   43.41    2.28
   6  -1  -3   44.43    2.00
  -6   1   3   45.90    2.01
  -6  -1   3   42.51    2.07
  -6   1   3   44.92    1.91
   6   1  -3   45.78    3.39
   4   0  -6   88.93    3.44
  -4   0   6   84.25    3.40
  -4   0   6   92.78    6.17
  -4   0   6   84.93    3.87
  -4   0  -6  867.55   30.47
  -4   0  -6  838.12   29.71
   4   0   6  888.85   30.50
  -4   0  -6  884.46   30.20
   4   0   6  874.29   30.75
  -6   0   4  654.47   24.23
  -6   0   4  655.47   22.53
   6   0  -4  609.10   20.94
  -6   0   4  676.95   23.67
   6   0  -4  692.91   23.87
   2   2  -5    0.54    1.12
  -2   2   5    0.26    0.41
   2  -2  -5    0.66    0.90
   2  -2  -5    0.74    0.60
   2   2  -5    0.83    0.62
   2   2  -5    0.46    0.57
  -2  -2   5   -0.04    1.12
  -2  -2   5    0.67    1.25
  -2   2   5    1.01    0.97
   2  -2  -5    0.36    0.49
   2   2  -5    0.98    1.02
   2   2  -5    0.59    1.64
  -2  -2   5    1.23    2.10
  -2   2   5    0.31    0.37
   6   0   4   66.85    3.11
  -6   0  -4   68.50    2.77
   2   2   5   90.26    3.96
   2   2   5  101.40    4.25
   2   2   5   94.19    3.70
   2  -2   5  101.74    4.35
  -2   2  -5   89.02    4.20
  -2   2  -5   88.67    3.78
  -2   2  -5   87.63    3.72
   2   2   5   86.98    4.15
   2  -2   5   85.84    4.32
  -2  -2  -5   86.47    4.96
  -2   2  -5   88.71    6.13
  -2   2  -5   91.24    4.49
  -2  -2  -5   86.63    3.72
   5   2  -2    2.93    0.61
   5  -2  -2    5.93    1.43
  -5   2   2    1.94    0.48
   5  -2  -2    2.57    0.65
  -5   2   2    1.40    0.41
   5   2  -2    5.58    1.82
  -5   2   2    5.34    1.83
  -5  -2   2    2.71    1.21
   5   2  -2    1.94    0.95
  -5  -2   2    2.98    0.82
   0   3   0    0.09    0.56
   0   3   0   -0.32    1.84
   0   3   0    0.10    0.56
   0  -3   0    0.28    1.48
   0   3   0   -0.11    0.73
   0  -3   0    0.35    0.54
   5  -2   2    6.03    1.04
  -5  -2  -2    6.57    0.91
  -5  -2  -2    7.33    1.88
   5   2   2    6.94    1.98
   5  -2   2    6.78    0.90
  -5   2  -2    6.04    0.73
  -5  -2  -2    5.86    1.13
   5  -2   2    6.20    1.73
   5   2   2    6.70    0.70
   5  -2   2    7.33    0.98
   5   2   2    6.46    1.05
  -2   0   7   -1.23    1.61
   2   0  -7   -0.08    0.53
  -2   0   7   -0.08    0.46
   2   0  -7   -0.07    0.28
  -2   0   7    0.04    1.05
  -2   0   7    0.39    0.97
  -2   0  -7    0.04    0.36
  -2   0  -7    0.09    0.59
   2   0   7   -0.01    0.94
   2   0   7    0.27    0.87
  -2   0  -7   -0.00    0.87
   2   0   7   -0.16    0.62
  -7   0   2   -0.05    0.47
  -7   0   2    0.86    1.68
   7   0  -2    0.02    0.33
  -7   0   2    0.05    0.40
   7   0  -2   -0.12    0.36
   7   0  -2    0.15    1.37
   7   0   2   -0.01    0.39
  -7   0  -2   -0.19    0.34
  -7   0  -2    0.13    0.36
   7   0   2   -0.22    0.33
   0   3  -1  178.98    6.82
   0  -3  -1  165.05    6.43
   0   3  -1  163.50    8.43
   0   3   1  175.19    6.68
   0  -3   1  169.72    7.98
   0   3  -1  173.00    6.61
   0  -3   1  176.15    6.77
   0   3  -1  167.81    7.15
   0   3   1  177.76    6.74
   0   3   1  165.90    7.48
   0   3  -1  176.08    7.31
   1   3   0  104.54    4.88
  -1   3   0  103.21    4.25
  -1  -3   0  101.98    5.78
   1  -3   0   99.99    6.16
   1   3   0  116.57    4.83
   1  -3   0  107.66    4.52
   1   3   0  105.61    4.32
   1   3   0  114.88    6.23
  -1   3   0  104.88    4.28
  -1   3   0  104.16    4.96
   1   3   0  100.85    5.15
   1   3  -1    5.27    1.87
   1   3  -1    5.71    1.37
  -1   3   1    4.97    0.81
  -1  -3   1    5.75    1.83
  -1  -3   1    5.48    0.82
   1   3  -1    5.40    1.28
   1   3  -1    5.93    0.97
  -1   3   1    5.75    1.15
  -1   3   1    5.38    0.80
   1   3  -1    5.19    0.84
  -1   3   1    5.29    1.04
  -1   3  -1   18.26    1.31
   1  -3   1   17.74    1.34
  -1   3  -1   17.66    1.71
   1  -3   1   17.62    2.19
   1   3   1   19.08    1.41
  -1   3  -1   17.45    1.25
   1   3   1   17.59    2.10
  -1  -3  -1   18.15    2.34
   1   3   1   17.55    1.22
   1  -3   1   17.91    1.32
   1   3   1   18.67    2.50
   0   1  -7   15.63    1.69
   0   1   7   14.66    0.88
   0   1  -7   15.72    1.27
   0  -1  -7   14.71    1.20
   0  -1  -7   16.56    2.13
   0   1   7   18.95    3.02
   0  -1  -7   20.29    1.80
   0   1  -7   20.86    1.95
   0   1   7   19.54    1.89
   0  -1   7   19.29    1.93
   0  -1   7   15.94    1.70
   0  -1  -7   15.15    0.94
   0  -1   7   18.14    2.90
   0   1  -7   20.24    2.95
   0   1   7   15.00    1.22
   0   1  -7   18.20    1.41
   7   1   0  132.24    4.92
   7   1   0  128.08    4.95
  -7  -1   0  120.09    5.31
  -7   1   0  126.48    4.73
  -7   1   0  124.89    6.42
  -7  -1   0  128.44    6.76
   7   1   0  135.79    6.85
   7  -1   0  126.54    6.54
   7  -1   0  128.05    4.78
   7  -1   0  126.35    4.87
  -7   1   0  137.70    5.04
   4  -2  -4  528.00   18.60
   4   2  -4  522.88   19.39
  -4   2   4  534.99   18.46
  -4  -2   4  528.68   18.76
   4  -2  -4  533.58   19.57
  -4   2   4  524.20   19.64
  -4  -2   4  556.98   20.21
   4   2  -4  570.26   20.70
  -4  -2   4  495.54   18.95
  -4   2   4  563.24   19.42
   4   2   4  171.55    6.54
  -4   2  -4  153.07    5.92
   4   2   4  185.36    8.37
   4   2   4  174.31    7.11
  -4   2  -4  186.73    7.53
  -4  -2  -4  168.08    6.64
  -4   2  -4  160.64    6.08
   4  -2   4  176.79    6.83
   4   2   4  172.46    7.21
   4  -2   4  172.05    7.12
   4   2   4  171.64    6.54
   4  -2   4  174.72    6.73
   1   1  -7  391.84   14.68
   1  -1  -7  379.89   13.29
  -1  -1   7  364.29   13.89
   1  -1  -7  374.59   13.53
  -1  -1   7  374.07   13.98
  -1   1   7  379.79   14.29
  -1   1   7  376.24   13.08
   1   1  -7  359.84   13.55
   1  -1  -7  364.68   13.64
   1   1  -7  341.57   12.36
   1   1  -7  372.24   13.44
   1   1  -7  370.01   14.84
  -1   1   7  387.27   15.66
  -1  -1   7  357.54   14.96
  -1   1   7  371.23   13.30
  -1   1  -7  137.30    7.43
  -1  -1  -7  124.21    5.43
  -1   1  -7  127.54    5.08
   1   1   7  120.86    7.03
  -1   1  -7  131.94    5.86
  -1  -1  -7  126.68    6.60
   1  -1   7  176.03   10.57
  -1   1  -7  131.27    5.72
   1   1   7  123.36    5.19
  -1  -1  -7  136.00    5.08
   1  -1   7  139.03    6.11
   1  -1   7  133.02    5.25
   1   1   7  129.32    5.72
  -5  -1   5  386.82   15.45
   5   1  -5  382.51   14.68
  -5   1   5  379.41   14.82
   5   1  -5  355.29   12.52
   5  -1  -5  336.40   11.84
  -5   1   5  368.46   12.96
   5   1  -5  384.32   14.04
  -5   1   5  368.85   12.83
  -5  -1   5  365.13   13.62
  -5  -1   5  370.04   13.21
   5  -1  -5  388.84   13.57
   5  -1  -5  373.66   14.28
   5   1   5  349.60   12.21
   5  -1   5  349.05   12.67
   5  -1   5  339.45   12.78
   5   1   5  352.47   13.13
   5  -1   5  356.33   12.83
  -5   1  -5  339.54   12.26
  -5   1  -5  354.09   12.39
  -5  -1  -5  349.76   12.54
  -7   1   1    6.63    0.63
   7   1  -1   11.53    2.76
   7  -1  -1   10.23    2.18
  -7  -1   1   12.32    3.77
  -7   1   1   12.20    2.28
  -7  -1   1    6.98    1.20
   7   1  -1    6.53    0.75
  -7   1   1    5.95    0.61
   7  -1  -1    7.08    0.73
   7  -1  -1    7.24    0.68
  -7  -1   1    6.90    0.73
   7   1  -1    6.85    0.64
  -7  -1  -1   61.33    3.21
   7  -1   1   63.40    2.72
  -7   1  -1   73.11    4.43
   7   1   1   65.40    2.60
   7  -1   1   64.70    2.62
   7   1   1   60.36    2.53
   7   1   1   77.18    4.85
   7  -1   1   75.74    4.72
  -7  -1  -1   78.76    4.96
  -7   1  -1   61.25    2.47
   0   3  -2  191.78    7.07
   0  -3  -2  176.12    6.63
   0  -3   2  184.22    6.83
   0  -3   2  188.48    8.36
   0   3   2  189.67    6.92
   0   3   2  186.18    8.33
   0   3  -2  189.57    6.99
   0  -3  -2  180.28    6.76
   0   3  -2  182.82    7.43
   0   3  -2  195.79    7.87
   0   3   2  181.60    7.17
   0   3  -2  168.85    8.41
   0   3   2  181.78    6.72
   2  -3   0  122.19    4.94
   2   3   0  120.15    4.72
   2   3   0  119.46    4.89
  -2   3   0  121.65    4.75
   2   3   0  118.57    4.70
   2  -3   0  121.57    4.82
  -2  -3   0  125.25    6.55
  -2   3   0  122.21    4.73
   2   3   0  116.03    5.27
   2   3   0  113.22    5.73
  -3   2   5  247.77    8.55
   3  -2  -5  225.11    7.99
  -3  -2   5  226.66   10.06
  -3  -2   5  218.73    9.20
   3   2  -5  234.31    8.41
  -3   2   5  227.48    7.88
   3   2  -5  225.64    8.90
  -3   2   5  226.03    9.07
   3   2  -5  244.15    9.42
   3   2  -5  232.06    8.49
  -3  -2   5  249.60    9.63
   3  -2  -5  225.61    8.80
   3  -2  -5  237.57    8.59
  -3   2  -5  123.29    4.83
   3   2   5  124.66    4.84
  -3   2  -5  121.85    5.40
   3  -2   5  126.56    5.53
  -3   2  -5  131.08    5.55
   3   2   5  131.75    5.56
  -3  -2  -5  133.65    7.20
   3  -2   5  127.86    5.01
  -3   2  -5  129.83    5.00
   3   2   5  125.20    4.66
   3   2   5  120.79    4.79
  -5   2   3  134.71    4.84
   5  -2  -3  130.58    5.99
  -5   2   3  135.60    4.92
   5   2  -3  135.81    5.85
   5  -2  -3  126.71    4.86
   5   2  -3  132.35    6.17
  -5   2   3  129.91    6.34
   5   2  -3  117.57    4.57
  -5  -2   3  140.81    5.51
   5  -2  -3  127.78    4.83
  -1  -3   2  235.71   11.56
  -1   3   2  225.44   10.09
   1   3  -2  235.36    9.19
   1   3  -2  264.40    9.60
  -1  -3   2  241.58    8.70
   1   3  -2  212.50    8.95
   1   3  -2  238.40    8.60
  -1   3   2  233.33    8.51
   1  -3  -2  240.86    9.15
  -1   3   2  229.24    8.17
   1  -3  -2  229.51    8.38
   1   3  -2  216.40    9.69
  -1   3   2  218.45    8.48
  -1   3  -2  154.62    5.84
  -1  -3  -2  146.15    5.58
  -1   3  -2  179.02    7.24
   1  -3   2  174.79    7.63
   1   3   2  172.94    7.93
   1   3   2  161.89    6.04
  -1   3  -2  163.98    6.15
  -1  -3  -2  161.79    6.16
   1  -3   2  160.90    6.11
   1   3   2  161.66    6.09
  -1   3  -2  238.43   12.70
   5   2   3   76.22    3.76
   5  -2   3   81.14    3.48
  -5   2  -3   73.06    2.96
   5   2   3   75.73    3.12
   5  -2   3   82.67    3.95
   5   2   3   81.46    4.75
  -5  -2  -3   81.16    3.61
   5  -2   3   77.08    3.32
  -5   2  -3   74.29    3.13
   2   3  -1  688.14   23.21
   2   3  -1  666.29   23.34
  -2  -3   1  660.98   24.22
   2   3  -1  661.73   22.43
  -2   3   1  697.34   23.46
   2   3  -1  651.18   22.24
   2   3  -1  650.51   23.02
  -2   3   1  662.91   22.29
   2   3   1    6.73    1.09
   2   3   1    8.27    0.94
   2   3   1    5.41    1.11
  -2   3  -1    7.31    0.82
   2  -3   1    8.97    0.98
  -2   3  -1   14.63    1.40
  -2   3  -1    6.11    0.76
   2  -3   1    8.42    1.09
   2   3   1   12.81    2.63
  -2  -3  -1   16.45    2.27
   2  -3   1   14.10    2.08
  -4   1   6    3.85    0.45
   4   1  -6    4.03    0.53
  -4  -1   6    4.09    0.78
   4   1  -6    4.24    1.24
   4  -1  -6    4.08    0.53
  -4   1   6    4.32    1.44
  -4   1   6    3.47    0.64
   4   1  -6    4.24    0.99
  -4  -1   6    3.72    1.06
  -4  -1   6    3.75    1.42
   4  -1  -6    3.65    1.18
  -3   0   7  133.00    6.41
   3   0  -7  141.12    5.08
  -3   0   7  143.03    6.62
  -3   0   7  132.67    5.08
   3   0  -7  141.60    5.34
  -3   0   7  141.33    5.81
  -4  -1  -6    4.42    2.88
  -4  -1  -6    5.66    0.78
  -4   1  -6    4.97    0.56
   4  -1   6    5.34    0.76
   4   1   6    5.06    0.48
   4   1   6    4.91    1.14
  -4   1  -6    5.08    1.12
   4  -1   6    4.34    1.02
  -4   1  -6    5.43    1.18
  -4   1  -6    4.91    0.72
   6   1  -4    1.03    1.45
  -6  -1   4    0.05    1.63
  -6   1   4    1.12    0.35
   6  -1  -4    0.85    0.40
   6   1  -4    0.93    0.64
  -6   1   4    0.73    0.41
  -6   1   4    0.58    1.22
   6  -1  -4    0.79    0.43
   6  -1  -4    0.96    1.27
  -6  -1   4    0.83    0.49
  -3   0  -7  171.60    8.75
  -3   0  -7  212.55    8.28
   3   0   7  194.07    7.15
   3   0   7  193.63    7.70
   3   0   7  198.37    7.83
  -3   0  -7  201.16    7.95
  -6  -1  -4   11.51    0.92
   6   1   4   11.63    2.00
  -6   1  -4   12.05    0.76
  -6   1  -4   11.51    0.91
   6  -1   4   11.59    1.01
   6   1   4   12.13    0.78
   6  -1   4   11.80    0.91
   6  -1   4   10.73    1.36
   6   1   4   10.41    0.79
   7   0  -3  298.09   11.82
  -7   0   3  313.34   12.58
   7   0  -3  314.58   10.75
  -7   0   3  322.19   10.96
   7   0   3  191.09    6.65
  -7   0  -3  190.57    6.76
  -7   0  -3  184.19    6.46
   7   0   3  188.39    6.83
   2   1  -7  426.72   14.69
  -2   1   7  424.04   14.55
  -2  -1   7  443.03   16.16
   2  -1  -7  435.54   15.64
   2  -1  -7  437.65   14.94
   2   1  -7  401.32   13.86
  -2   1   7  424.38   16.07
  -2  -1   7  436.28   17.11
   2  -1  -7  441.16   14.85
  -2   1   7  407.76   13.68
   2   1  -7  434.71   15.66
  -2   1   7  432.81   15.69
  -2  -1   7  433.63   15.51
   2   1  -7  436.29   15.60
  -2   1  -7  165.71    6.92
  -2   1  -7  153.75    6.46
  -2  -1  -7  155.73    8.07
  -2   1  -7  156.34    8.11
   2   1   7  155.87    6.34
  -2   1  -7  158.24    6.18
   2   1   7  148.94    5.26
   2  -1   7  152.27    5.88
   2   1   7  155.85    6.44
   2   1   7  161.18    6.07
  -2  -1  -7  151.55    5.57
  -2  -1  -7  151.25    6.27
   2  -1   7  156.74    6.46
  -7  -1   2   93.46    4.30
  -7  -1   2   97.75    3.82
  -7   1   2  101.46    3.75
   7  -1  -2   96.67    3.73
   7   1  -2  100.15    5.79
   7   1  -2  100.30    3.76
  -7   1   2  104.96    5.78
   7   1  -2  100.52    4.02
  -7  -1   2  102.71    6.45
   7  -1  -2   98.64    5.74
   0  -2   6  231.32    9.18
   0   2  -6  247.06    9.48
   0   2   6  234.84    9.05
   0  -2  -6  232.82    8.91
   0  -2   6  256.10    9.16
   0  -2  -6  224.51    8.23
   0   2  -6  239.40    8.67
   0   2  -6  255.55   11.28
   0  -2   6  307.27   14.99
   0   2   6  241.02    8.56
   0   2   6  247.16   10.80
   0  -2  -6  231.69    8.27
   0   2   6  231.75    8.01
   0   2  -6  214.88    8.48
   0  -2   6  240.38    9.25
   7   1   2  499.91   18.78
  -7   1  -2  462.67   15.47
   7   1   2  505.95   16.91
  -7  -1  -2  487.33   17.29
  -7  -1  -2  468.56   15.87
   7  -1   2  497.17   16.71
   7  -1   2  504.42   17.15
  -7  -1  -2  529.15   19.72
  -7   1  -2  492.31   16.52
   7   1   2  503.36   16.97
   7  -1   2  467.94   17.78
   6  -2   0   17.99    1.28
  -6  -2   0   17.82    1.75
   6   2   0   23.30    2.81
   6  -2   0   17.19    1.20
   6   2   0   19.34    1.74
  -6   2   0   16.39    1.14
   6   2   0   16.75    1.13
   6  -2   0   23.64    2.56
   1  -2  -6   81.28    3.72
   1   2  -6   81.66    3.47
  -1   2   6   79.30    4.07
  -1  -2   6   84.63    4.52
  -1  -2   6   87.16    4.24
  -1   2   6   85.34    3.24
   1  -2  -6   83.24    3.40
   1   2  -6   87.42    4.33
  -1  -2   6   73.41    5.06
   1   2  -6   87.46    5.24
  -1   2   6   78.14    4.63
   1  -2  -6   86.71    4.12
   1   2  -6   77.90    3.50
  -1   2   6   86.82    3.41
   1  -2   6  253.90    9.08
  -1   2  -6  244.11    8.76
   1  -2   6  261.68   10.15
  -1  -2  -6  258.20    9.71
   1   2   6  266.17   10.01
  -1   2  -6  251.47    9.69
  -1  -2  -6  254.48    9.08
   1   2   6  241.17    8.32
  -1   2  -6  277.99   10.44
  -1   2  -6  258.28   11.55
  -1  -2  -6  262.41    9.40
   1   2   6  257.34    9.16
   1   2   6  233.74   10.60
  -2  -3   2    1.15    1.50
   2  -3  -2    0.92    0.67
   2   3  -2    1.75    1.10
  -2  -3   2    0.96    2.15
   2   3  -2    1.45    1.37
   2   3  -2    0.69    0.62
  -2   3   2    0.86    0.56
  -2   3   2    1.28    0.63
   2   3  -2    0.65    0.70
   2   3  -2    0.59    1.13
   2   3   2   37.98    2.00
   2  -3   2   37.80    2.07
   2   3   2   34.49    1.83
   2  -3   2   35.62    1.94
  -2   3  -2   35.02    2.21
   2   3   2   35.39    2.31
  -2   3  -2   35.97    1.92
   2   3   2   35.40    2.00
  -2   3  -2   36.18    1.89
   2  -3   2   35.37    2.58
   2   3   2   32.83    2.82
  -6  -2   1  254.06    9.74
   6  -2  -1  256.00    9.09
   6  -2  -1  256.85    9.08
  -6   2   1  252.50   10.51
   6   2  -1  259.31    9.86
  -6  -2   1  251.74    9.11
   6  -2  -1  241.74   10.11
  -6   2   1  258.35    8.85
   6   2  -1  244.37   10.19
   6   2  -1  235.19    8.33
  -6  -2  -1   89.98    4.36
   6   2   1   90.56    4.22
  -6   2  -1   85.19    3.37
   6  -2   1   92.76    5.34
  -6  -2  -1   89.22    3.81
   6  -2   1   89.94    3.86
   6   2   1   89.91    5.17
   6   2   1   87.86    3.51
  -6   2  -1   87.09    3.42
   6  -2   1   89.78    3.71
   5   0  -6    0.05    0.29
  -5   0   6   -0.19    1.32
  -5   0   6   -0.28    0.35
  -5   0   6   -0.13    0.71
   5   0  -6   -0.19    0.42
   6   0  -5    0.08    0.37
  -6   0   5    0.12    0.31
  -6   0   5    0.61    0.77
  -6   0   5    0.20    1.47
   6   0  -5    0.51    1.14
   6   0  -5    0.06    0.32
  -5   0  -6   -0.13    0.72
  -5   0  -6   -0.02    0.26
   5   0   6    0.38    0.92
   5   0   6   -0.03    0.29
   6   0   5   -0.00    0.43
  -6   0  -5    0.03    0.29
   6   0   5    0.25    0.83
   6   0   5   -0.05    0.30
   0   3   3    0.91    0.72
   0  -3   3    1.02    0.65
   0  -3  -3    0.96    0.64
   0   3   3    1.05    0.56
   0   3   3    0.13    1.32
   0  -3   3    1.36    1.19
   0   3  -3    1.00    0.91
   0   3   3    1.00    0.44
   0  -3  -3    0.64    0.54
   0   3  -3    0.58    1.95
   0   3  -3    0.33    1.04
   0   3  -3    1.41    0.69
   3   3   0    0.27    0.56
   3  -3   0   -0.03    0.59
  -3   3   0    0.51    0.59
   3   3   0    0.24    0.72
   3  -3   0    0.45    0.58
   3   3   0    0.63    0.63
   3   3   0   -0.41    1.39
  -3  -3   0    1.05    1.63
   3   3   0    0.20    0.84
  -3   3   0    0.48    0.49
   1   3  -3   71.02    3.72
   1   3  -3   68.81    4.59
   1   3  -3   57.35    2.66
  -1   3   3   70.36    4.15
  -1   3   3   48.54    2.30
  -1   3   3   46.30    2.15
  -1  -3   3   74.41    4.42
  -1  -3   3   45.17    2.21
  -1   3   3   73.03    3.62
   1  -3  -3   48.82    2.47
   1   3  -3   47.32    2.85
   1  -3  -3   51.63    2.47
   1  -3   3  465.14   17.57
  -1   3  -3  484.85   16.62
   1   3   3  462.71   15.97
  -1   3  -3  494.83   17.62
   1   3   3  482.21   16.63
  -1   3  -3  432.37   17.46
   1  -3   3  482.68   16.62
  -1  -3  -3  457.99   16.44
  -1   3  -3  454.59   16.35
   1   3   3  425.81   16.18
  -1  -3  -3  464.94   16.07
   1   3   3  459.40   16.25
   3  -3  -1   23.50    1.54
  -3   3   1   21.86    1.33
  -3  -3   1   35.51    3.95
   3   3  -1   22.42    1.61
  -3   3   1   21.94    1.34
   3   3  -1   20.38    1.34
   3   3  -1   34.11    2.92
   3   3  -1   21.12    1.94
  -3  -3   1   26.72    2.93
   3   3   1  807.94   27.86
   3   3   1  713.23   24.28
  -3   3  -1  818.62   27.42
   3   3   1  797.78   26.79
   3   3   1  769.60   27.46
  -3  -3  -1  803.11   28.84
   3  -3   1  717.30   25.47
   3  -3   1  822.89   27.65
   3  -3   1  784.00   26.41
  -3   3  -1  820.55   27.49
   3   3   1  789.79   26.50
   2  -2  -6   12.49    1.96
   2   2  -6   12.64    1.06
   2  -2  -6   12.76    2.15
  -2   2   6   11.86    0.80
   2   2  -6   12.68    2.16
  -2  -2   6   12.29    2.34
   2   2  -6   12.61    1.14
   2  -2  -6   12.59    0.93
  -2   2   6   14.68    0.88
  -2  -2   6   14.53    1.59
  -2  -2   6   12.17    3.85
  -2   2   6   11.82    2.83
   2   2  -6   11.99    3.09
  -2  -2  -6  236.54    9.98
   2   2   6  261.59    9.82
  -2  -2  -6  243.06    9.20
  -2   2  -6  233.41    9.17
  -2   2  -6  238.49    8.58
  -2   2  -6  233.19   10.76
   2   2   6  244.69    8.81
   2   2   6  247.19    8.99
  -2   2  -6  239.37    8.64
  -2  -2  -6  225.19    8.18
   2  -2   6  245.42    9.53
  -2   2  -6  263.05    9.87
   2  -2   6  250.29    9.05
   2   2   6  246.90    8.51
  -6  -2   2  630.40   21.42
   6   2  -2  561.43   20.52
  -6   2   2  588.16   19.67
  -6   2   2  559.14   20.80
   6   2  -2  547.09   19.19
   6  -2  -2  582.22   19.69
  -6  -2   2  541.37   19.09
   6  -2  -2  565.67   20.53
  -6   2   2  570.54   18.97
   6   2  -2  552.48   18.63
   6   2   2    1.26    0.57
   6  -2   2    1.31    0.77
   6   2   2    5.07    2.16
   6  -2   2    1.04    1.36
  -6  -2  -2    3.59    2.45
  -6  -2  -2    1.34    0.94
   6  -2   2    1.19    0.58
  -6   2  -2    1.08    0.45
   6  -2   2    1.34    0.64
   3   1  -7    5.06    1.21
  -3   1   7    5.12    1.36
  -3  -1   7    2.47    0.71
  -3  -1   7    6.07    1.50
  -3  -1   7    2.34    0.99
   3  -1  -7    1.72    0.43
   3   1  -7    2.31    0.51
  -3   1   7    2.10    0.57
   3  -1  -7    1.84    0.44
   3  -1  -7    5.14    1.14
  -3  -1   7    3.90    1.75
  -3   1   7    2.38    1.27
  -3   1   7    1.77    0.34
   0   0  -8  149.69    5.78
   0   0   8  128.33    6.98
   0   0   8  142.01    5.95
   0   0  -8  138.95    5.10
   0   0  -8  141.46    5.46
   0   0  -8  137.00    5.82
   0   0   8  151.80    6.46
  -3   1  -7    8.23    1.25
  -3   1  -7    9.47    2.68
  -3  -1  -7    8.78    2.20
   3   1   7    8.24    0.59
  -3   1  -7    8.47    0.81
   3  -1   7    7.58    0.92
   3   1   7   11.41    0.95
   3   1   7   11.17    1.38
  -3   1  -7   10.31    1.38
   3   1   7    8.41    1.18
  -3  -1  -7    9.19    0.76
  -3   1  -7    9.07    0.93
  -7  -1   3   41.64    3.48
  -7   1   3   41.67    1.76
   7  -1  -3   38.71    2.88
   7   1  -3   40.53    2.99
  -7   1   3   39.22    3.16
  -7  -1   3   38.77    2.44
   7   1  -3   40.00    2.03
   7  -1  -3   40.43    1.84
  -7  -1   3   39.21    1.91
   7   1   3   86.34    3.44
   7  -1   3   82.24    4.73
   7   1   3   79.11    4.73
  -7   1  -3   84.97    3.30
   7   1   3   86.24    3.25
   7  -1   3   85.07    3.51
  -7   1  -3   86.93    3.26
   7  -1   3   74.62    3.59
   7  -1   3   84.42    3.28
  -7  -1  -3   80.47    3.25
  -7  -1  -3   86.05    4.12
   4   2  -5   67.84    3.57
  -4   2   5   64.30    2.56
  -4   2   5   58.95    3.52
  -4   2   5   63.81    2.51
   4   2  -5   59.00    2.68
   4  -2  -5   60.13    2.70
  -4  -2   5   58.65    4.05
  -4  -2   5   63.33    3.36
   4  -2  -5   60.62    3.30
   4   2  -5   57.98    3.36
  -4  -2   5   65.88    3.06
  -5   2   4   24.03    2.37
   5  -2  -4   23.89    1.42
   5  -2  -4   23.50    2.00
  -5   2   4   26.67    1.28
  -5  -2   4   23.30    1.62
   5   2  -4   26.67    2.07
  -5  -2   4   22.29    2.23
   5   2  -4   24.85    2.30
  -5   2   4   26.20    1.29
   4   2   5    6.53    1.22
  -4   2  -5    5.98    1.11
   4  -2   5    5.12    1.11
   4   2   5    5.40    1.07
  -4  -2  -5    7.22    2.41
   4   2   5    4.84    0.61
   4   2   5    5.82    0.78
   4   2   5    6.89    1.87
   4   2   5    4.96    0.64
  -4   2  -5    4.49    0.68
  -4   2  -5    4.71    0.75
   4  -2   5    4.44    0.74
  -8   0   0   16.81    2.57
   8   0   0   13.87    2.40
   8   0   0   10.67    0.73
   8   0   0   10.45    0.77
  -8   0   0   10.28    0.86
  -8   0   0   10.75    0.81
  -5  -2  -4   39.09    2.16
  -5   2  -4   36.22    1.87
   5   2   4   38.22    1.97
   5   2   4   36.71    1.80
   5   2   4   38.82    3.15
   5  -2   4   38.05    2.39
   5  -2   4   37.67    2.00
  -5   2  -4   36.11    1.69
   5  -2   4   39.64    2.06
   5   2   4   38.33    2.41
  -1   0   8   -0.20    1.20
  -1   0   8    0.06    0.92
   1   0  -8   -0.02    0.53
  -1   0   8    0.04    1.73
   1   0  -8    0.03    0.24
  -1   0  -8    0.09    0.57
   1   0   8    0.45    2.20
  -1   0  -8   -0.11    1.00
   1   0   8   -0.09    0.80
   1   0   8    0.26    0.84
  -4   0   7   -0.82    1.09
  -4   0   7   -0.21    1.21
  -4   0   7   -0.22    0.67
  -4   0   7   -0.00    0.39
   4   0  -7    0.08    0.29
  -4   0  -7   -0.03    0.19
  -4   0  -7   -0.32    2.83
  -4   0  -7   -0.14    0.73
  -4   0  -7   -0.01    0.80
   4   0   7    0.38    1.02
   4   0   7   -0.04    0.37
  -7   0   4    0.99    1.45
   7   0  -4   -0.50    1.06
   7   0  -4    0.01    0.29
  -7   0   4   -0.05    0.37
   7   0  -4    0.07    0.40
   7   0   4    0.17    0.41
  -7   0  -4   -0.06    0.28
  -7   0  -4   -0.07    0.32
   7   0   4    0.07    0.28
   8   0  -1   -0.24    0.30
   8   0  -1   -1.39    1.63
   8   0  -1   -0.09    0.35
  -8   0   1    0.32    0.53
  -8   0   1   -1.07    1.99
  -8   0   1    0.13    0.39
   8   0   1   -0.22    0.34
  -8   0  -1   -0.30    0.38
   8   0   1    0.08    0.30
   8   0   1    1.10    1.84
  -8   0  -1    0.77    1.24
   2  -3  -3   25.29    1.57
   2  -3  -3   24.75    2.12
  -2   3   3   25.51    1.48
   2   3  -3   27.03    2.16
  -2   3   3   24.85    1.39
   2   3  -3   24.38    2.39
  -2  -3   3   26.14    3.38
   2   3  -3   22.48    1.57
  -2   3   3   25.96    2.18
  -2  -3   3   25.97    3.84
   2   3  -3   25.49    2.49
  -2   3  -3    9.53    0.98
   2   3   3    9.91    0.90
   2  -3   3   21.07    2.00
   2   3   3   19.70    2.21
   2   3   3   21.02    1.63
  -2   3  -3   23.43    1.81
   2  -3   3   10.04    1.07
   2   3   3    9.29    0.98
   2   3   3    8.79    0.97
  -3  -3   2  377.35   13.70
   3   3  -2  366.96   13.72
   3   3  -2  389.30   13.70
  -3   3   2  386.11   13.35
   3  -3  -2  328.63   11.62
   3   3  -2  381.55   13.20
  -3  -3   2  386.37   15.11
  -3  -3   2  349.23   14.47
  -3   3   2  377.79   12.94
   3   3  -2  374.31   13.72
   3   3   2   65.98    4.12
   3  -3   2   70.03    3.70
  -3   3  -2   69.01    2.98
   3   3   2   70.24    3.22
   3  -3   2   69.97    3.10
   3  -3   2   73.48    3.23
   3   3   2   72.07    3.70
   3   3   2   73.40    3.15
  -3   3  -2   72.37    3.12
   3   3   2   70.00    3.04
  -3   3  -2   69.61    3.42
   5   1  -6  212.05    7.47
  -5  -1   6  236.22   10.21
  -5   1   6  215.95    7.47
  -5  -1   6  233.66    8.94
   5   1  -6  251.49    9.23
  -5   1   6  233.14    8.23
  -5   1   6  239.25    9.95
   5  -1  -6  229.43    7.96
   5  -1  -6  232.11    9.40
   5   1  -6  238.48    9.51
  -5  -1   6  229.20    8.28
   6   1  -5  557.20   18.66
  -6   1   5  514.26   18.84
   6   1  -5  530.03   19.02
   6   1  -5  532.97   18.48
  -6  -1   5  490.91   17.30
   6  -1  -5  529.10   17.71
   6  -1  -5  512.50   18.48
  -6   1   5  551.94   18.36
  -6  -1   5  524.54   17.81
  -6   1   5  515.97   17.36
  -6  -1   5  533.91   19.66
   6  -1  -5  552.30   18.51
  -5   1  -6  546.00   18.58
  -5   1  -6  574.62   19.15
   5   1   6  580.12   20.19
  -5   1  -6  559.94   19.77
  -5  -1  -6  594.50   20.16
   5   1   6  555.77   18.48
   5  -1   6  573.90   19.50
  -5   1  -6  565.52   19.70
   5  -1   6  542.99   19.06
  -6   1  -5  266.61    9.51
   6   1   5  307.80   12.24
   6  -1   5  277.96    9.90
  -6   1  -5  289.09    9.87
   6  -1   5  272.56   10.27
  -6  -1  -5  282.80    9.93
   6   1   5  284.23   10.53
   6   1   5  281.11    9.57
   6  -1   5  267.84    9.59
  -2   0   8 1189.78   39.66
  -2   0   8 1187.34   40.31
   2   0  -8 1199.55   41.47
   2   0  -8 1156.36   38.03
  -2   0   8 1161.83   39.10
  -2   0   8 1272.50   46.04
   2   0   8  122.70    5.38
   2   0   8  125.29    7.33
  -2   0  -8  119.28    7.66
  -2   0  -8  110.97    4.60
  -2   0  -8  134.01    4.89
  -2   0  -8  121.44    5.80
  -2   0  -8  122.55    5.07
   3   2  -6   10.04    0.98
   3  -2  -6    8.43    0.76
  -3   2   6    8.15    0.67
  -3  -2   6   12.43    2.56
   3   2  -6    9.39    1.40
  -3  -2   6   10.87    1.38
   3  -2  -6   15.39    1.57
   3  -2  -6   10.12    0.95
   3   2  -6    9.45    0.93
   3   2  -6   14.82    1.60
  -3  -2   6   13.48    1.76
  -3   2   6    9.09    0.67
  -3   2   6   15.17    1.73
   3  -2   6   45.10    2.28
  -3  -2  -6   46.31    3.90
  -3   2  -6   54.55    5.32
  -3  -2  -6   42.29    2.20
  -3   2  -6   43.45    2.19
   3   2   6   45.47    1.96
  -3   2  -6   43.20    2.72
  -3   2  -6   41.49    2.52
   3   2   6   43.13    2.59
   3   2   6   42.75    2.21
  -3   2  -6   45.37    2.35
   3   2   6   41.15    2.05
   3  -2   6   41.85    2.66
  -8   0   2   55.68    7.09
  -8   0   2   60.33    2.44
   8   0  -2   56.75    6.75
   8   0  -2   54.43    2.19
  -8   0   2   54.37    2.53
   8   0  -2   54.79    2.26
   0   3   4   11.08    1.20
   0  -3   4   10.63    1.72
   0   3  -4    8.71    0.94
   0  -3  -4    8.88    0.97
   0   3  -4    9.20    1.44
   0  -3   4    8.08    0.86
   0   3  -4   10.35    2.47
   0  -3  -4    7.86    1.02
   0   3   4    9.80    1.71
   0   3   4   10.02    1.70
   0   3   4    8.13    0.86
   0   3   4    8.40    0.81
   0   3  -4   11.63    1.43
   0   3  -4    9.44    0.97
   8   0   2 1066.55   35.13
  -8   0  -2 1060.74   37.02
  -8   0  -2 1079.77   35.54
  -8   0  -2  991.88   32.84
   8   0   2 1021.64   33.83
  -6   2   3    3.45    0.50
  -6  -2   3    3.99    1.13
   6   2  -3    3.98    1.09
  -6  -2   3    4.37    0.78
   6  -2  -3    3.70    0.65
  -6   2   3    4.12    0.48
   6  -2  -3    5.46    1.37
   6   2  -3    3.84    0.62
  -6   2   3    5.63    1.61
   6   2  -3    4.62    1.40
   6  -2  -3    4.15    0.62
   6   2   3  190.34    7.48
  -6   2  -3  180.08    6.35
   6  -2   3  180.90    6.71
  -6  -2  -3  199.99    7.47
  -6   2  -3  177.75    6.47
   6   2   3  186.77    6.68
   6   2   3  182.32    8.16
  -6  -2  -3  177.48    7.20
   6  -2   3  197.60    7.23
   6  -2   3  170.43    7.73
   6  -2   3  175.41    7.03
   4  -3   0   83.24    3.54
   4   3   0   80.49    3.37
  -4   3   0   83.55    3.38
   4  -3   0   75.04    3.85
   4  -3   0   82.60    3.53
   4   3   0   87.74    3.79
  -4   3   0   80.99    3.32
   4   3   0   76.61    4.48
   4   3   0   81.30    4.03
   4  -3   0   76.27    4.50
  -4  -3   0   80.55    4.97
   1   3  -4  132.84    5.81
  -1   3   4  138.52    5.11
  -1   3   4  145.15    5.50
   1  -3  -4  135.53    5.28
   1   3  -4  137.62    5.40
  -1  -3   4  146.36    5.60
   1  -3  -4  145.89    5.78
   1   3  -4  141.53    7.05
  -1  -3   4  135.25    6.49
   1   3  -4  133.32    5.82
  -1   3   4  139.24    5.92
  -1  -3  -4  552.04   18.86
  -1   3  -4  504.15   19.59
  -1  -3  -4  548.88   18.80
   1   3   4  544.62   18.53
  -1   3  -4  515.80   17.62
   1  -3   4  520.93   18.74
   1   3   4  513.84   18.90
   1  -3   4  552.83   18.89
  -1   3  -4  545.51   19.35
   1   3   4  542.59   18.33
  -1   3  -4  561.47   19.68
   1   3   4  541.36   18.91
   0   1  -8  197.73    7.29
   0  -1  -8  214.11    7.48
   0  -1  -8  202.95    7.97
   0   1   8  196.39    7.48
   0   1  -8  217.81    8.58
   0  -1   8  203.96    9.74
   0   1  -8  229.31   10.23
   0   1   8  200.74    8.05
   0   1   8  205.26    9.57
   0  -1   8  210.02    8.42
   0  -1   8  212.75    8.34
   0  -1  -8  189.45    8.23
   0   1  -8  216.80    8.48
   0   1  -8  219.15    8.10
   4   3  -1   87.84    4.22
  -4   3   1   88.18    3.51
  -4  -3   1  100.12    5.61
   4  -3  -1   95.68    3.94
  -4  -3   1   80.28    3.90
  -4   3   1   91.26    3.61
   4   3  -1   99.94    4.18
   4   3  -1   88.30    3.63
   4   3  -1  101.10    5.22
  -4  -3   1  101.66    5.88
   4   3   1  101.93    4.24
   4   3   1  103.71    6.40
   4  -3   1  110.94    4.46
  -4   3  -1   98.74    3.94
   4  -3   1   94.76    4.49
   4   3   1  100.96    4.68
   4   3   1  100.57    4.26
   4  -3   1  101.80    4.19
  -4  -3  -1  105.57    6.66
   4   3   1  105.09    4.21
  -4   3  -1  102.24    4.04
  -8   1   0  147.26    7.18
   8  -1   0  141.29    5.07
  -8  -1   0  145.31    7.36
   8  -1   0  138.34    7.03
   8   1   0  141.91    5.09
  -8  -1   0  140.11    5.85
  -8   1   0  139.22    4.95
   8   1   0  145.01    7.24
  -8   1   0  137.92    4.97
   8  -1   0  139.95    5.36
   8   1   0  121.74    4.76
  -3   3   3   39.72    1.90
  -3  -3   3   36.60    3.44
   3  -3  -3   37.30    2.01
   3   3  -3   40.99    2.80
  -3  -3   3   40.99    3.40
  -3   3   3   39.68    3.25
   3   3  -3   40.88    2.27
  -3   3   3   42.10    2.06
   3   3  -3   39.58    2.57
   3  -3  -3   39.81    2.49
   1  -1  -8  118.26    4.85
  -1  -1   8  133.03    5.82
  -1   1   8  126.56    4.80
  -1   1   8  128.46    5.28
   1   1  -8  134.59    5.36
  -1   1   8  135.49    7.18
  -1  -1   8  138.17    6.23
   1   1  -8  133.34    6.67
   1  -1  -8  136.74    5.14
   1   1  -8  130.73    5.23
   1   1  -8  134.62    5.92
   1   1  -8  135.73    5.96
  -1   1   8  133.58    5.99
   1  -1  -8  120.43    5.35
  -1  -1   8  125.94    7.00
   3  -3   3   95.30    4.07
   3   3   3   93.93    4.12
   3   3   3   94.44    4.52
   3  -3   3   98.13    4.17
   3   3   3   88.64    4.98
   3   3   3   94.58    3.94
   3  -3   3   93.80    4.62
  -3   3  -3   95.84    4.43
   3   3   3   96.70    4.05
   1   1   8   11.28    2.69
  -1  -1  -8   13.03    1.42
  -1   1  -8   13.06    1.06
   1   1   8   11.96    1.27
  -1  -1  -8   13.32    0.86
  -1   1  -8   14.11    1.49
   1   1   8   12.89    1.60
   1  -1   8   17.18    4.60
   1  -1   8   13.02    1.50
  -1   1  -8   12.70    2.75
  -1  -1  -8   10.46    2.11
  -1   1  -8   12.99    1.46
  -1   1  -8   12.55    1.14
  -4  -1   7   33.52    2.95
  -4  -1   7   36.62    2.39
  -4  -1   7   39.82    3.42
  -4   1   7   37.18    3.09
   4  -1  -7   38.17    2.61
   4   1  -7   37.62    2.65
   4  -1  -7   33.30    1.60
   4  -1  -7   34.72    1.64
   4   1  -7   33.67    1.68
  -4  -1   7   35.77    2.02
  -4   1   7   34.06    1.55
  -4   1   7   36.22    1.88
   4  -1   7  102.73    4.29
  -4  -1  -7   92.70    5.87
   4   1   7  107.32    4.86
  -4   1  -7  101.62    4.85
  -4   1  -7   98.68    4.16
  -4   1  -7  158.44   10.23
   4   1   7   98.96    3.76
  -4   1  -7  101.56    3.93
  -4   1  -7  111.16    4.98
  -7   1   4  244.32    8.84
   7   1  -4  244.24    9.15
  -7   1   4  224.44    9.69
  -7  -1   4  239.71   10.37
   7   1  -4  238.07    9.91
   7  -1  -4  236.50    9.83
   7  -1  -4  235.71    8.48
  -7   1   4  233.63    8.34
  -7  -1   4  218.30    8.07
   7  -1  -4  242.06    8.73
  -7  -1  -4   64.42    2.79
   7   1   4   66.65    2.69
   7   1   4   67.01    4.23
   7  -1   4   63.63    2.91
   7  -1   4   60.91    3.22
   7  -1   4   65.75    2.82
  -7   1  -4   64.43    2.60
   7  -1   4   61.03    4.03
   7   1   4   62.47    2.73
  -7   1  -4   63.96    2.73
  -8  -1   1   13.75    2.41
  -8   1   1   14.92    0.93
   8  -1  -1   14.53    0.92
   8  -1  -1   14.85    1.03
  -8   1   1   14.94    2.18
  -8  -1   1   15.37    1.04
  -8  -1   1   14.29    1.51
  -8   1   1   13.97    0.84
   8   1  -1   14.44    2.28
   8  -1  -1   15.13    2.34
   8   1  -1   16.08    0.96
   8   1  -1   13.96    1.01
  -8  -1  -1    9.42    1.94
   8  -1   1    8.04    1.86
   8  -1   1    2.41    0.46
   8   1   1    2.11    0.40
  -8  -1  -1    3.43    0.54
  -8  -1  -1    3.02    0.91
  -8   1  -1    8.70    1.76
   8   1   1    8.69    2.00
  -8   1  -1    1.69    0.38
   8   1   1    2.07    0.46
   8  -1   1    3.39    0.63
  -6   0   6    3.38    0.77
  -6   0   6    4.62    1.67
   6   0  -6    4.44    1.22
  -6   0   6    3.07    0.51
   6   0  -6    3.35    0.47
   6   0  -6    3.75    0.56
   0   2  -7  142.12    6.25
   0  -2   7  130.44    5.77
   0   2  -7  123.07    4.99
   0   2   7  128.57    4.86
   0  -2  -7  136.12    5.94
   0  -2  -7  120.89    5.14
   0  -2  -7  126.25    4.98
   0   2  -7  125.74    5.66
   0   2   7  128.83    4.98
   0   2   7  129.98    5.92
   0   2   7  136.69    7.34
   0   2  -7  141.12    7.43
   0  -2   7  134.18    6.35
   6   0   6   21.42    1.78
  -6   0  -6   21.50    1.86
   6   0   6   22.71    1.19
  -6   0  -6   25.06    1.27
  -2  -3   4  109.29    5.69
  -2  -3   4  110.27    5.03
   2  -3  -4  103.71    4.39
  -2   3   4  106.61    4.30
   2   3  -4  100.12    4.79
  -2   3   4  104.10    4.09
  -2   3   4  103.64    4.92
   2   3  -4  106.62    4.98
   2  -3  -4  106.49    4.42
  -2  -3   4   94.81    5.99
   2   3  -4  100.85    5.38
  -2  -3  -4    8.49    0.93
   2   3   4    8.32    0.78
   2   3   4    8.05    1.53
   2  -3   4    7.98    1.64
  -2   3  -4    8.62    1.18
   2   3   4    8.39    1.12
  -2   3  -4   10.36    2.83
   2   3   4    8.40    0.96
  -2   3  -4    8.06    1.06
   2   3   4    8.74    1.10
   2  -3   4    9.27    1.05
   4   3  -2    4.74    0.79
  -4   3   2    4.69    0.60
   4   3  -2    4.30    0.85
  -4  -3   2    4.87    1.68
  -4   3   2    4.80    0.63
   4  -3  -2    4.00    0.71
   4   3  -2    4.71    1.22
  -4  -3   2    4.54    1.06
  -4  -3   2    3.96    1.86
   4   3  -2    3.65    1.56
   4   3   2  179.17    6.82
   4   3   2  176.57    6.78
   4   3   2  181.02    7.05
   4  -3   2  169.13    6.55
   4   3   2  167.54    7.83
   4  -3   2  168.28    7.14
  -4  -3  -2  174.95    8.26
   4   3   2  169.74    7.17
   4  -3   2  177.53    6.88
  -4  -3  -2  165.39    7.81
   7  -2   0  408.41   16.35
   7   2   0  430.78   15.27
  -7  -2   0  402.28   15.14
   7  -2   0  397.03   14.25
   7   2   0  362.08   13.48
  -7   2   0  378.85   13.39
   7   2   0  384.88   15.31
   7  -2   0  398.40   14.20
  -7   2   0  432.30   15.11
   3   0  -8    0.20    0.26
  -3   0   8   -0.23    0.88
  -3   0   8   -0.48    1.01
   3   0  -8   -0.37    0.40
  -3   0   8   -0.11    1.77
  -3   0   8   -0.08    0.41
  -3   0  -8    0.09    0.62
   3   0   8   -0.13    0.41
  -3   0  -8    0.33    0.89
  -3   0  -8    0.04    0.24
   3   0   8    0.38    0.74
   3   0   8   -0.11    0.76
  -3   0  -8   -0.05    1.89
   1   2  -7   18.79    2.46
   1  -2  -7   10.32    1.02
   1   2  -7   10.49    1.02
   1   2  -7   12.48    1.19
  -1   2   7    7.06    0.63
  -1   2   7   19.92    2.49
  -1   2   7   23.58    1.99
  -1  -2   7   22.09    2.20
   1  -2  -7   20.53    1.72
   1   2  -7    9.22    1.42
   1  -2  -7    9.88    0.85
  -1  -2   7   14.45    2.68
   1   2  -7   23.31    2.03
  -1   2   7    9.66    0.70
  -1  -2   7   10.35    1.52
   1   2   7  154.49    5.99
  -1  -2  -7  143.75    6.20
   1  -2   7  150.80    5.89
   1   2   7  143.32    6.27
  -1   2  -7  138.32    5.50
   1   2   7  147.10    5.96
  -1   2  -7  158.27    8.21
   1   2   7  135.52    7.31
  -1   2  -7  153.30    6.51
   1  -2   7  146.91    6.73
   1   2   7  157.87    5.84
  -1  -2  -7  151.09    5.87
  -1   2  -7  148.75    6.44
   1  -2   7  159.81    6.74
  -8   0   3   -0.02    0.33
   8   0  -3   -0.40    1.32
  -8   0   3    0.08    1.47
   8   0  -3    0.25    0.32
  -8   0   3   -0.15    0.51
  -5  -2   5   27.40    2.49
  -5  -2   5   22.62    1.89
  -5   2   5   20.40    1.08
  -5   2   5   18.30    1.06
   5  -2  -5   36.51    2.56
   5   2  -5   21.62    1.85
   5   2  -5   33.35    2.52
   5  -2  -5   21.46    1.34
  -5   2   5   32.73    2.61
   5   2  -5   21.95    1.39
  -5  -2   5   25.39    1.65
   8   0   3    0.13    0.28
  -8   0  -3   -0.06    0.28
  -8   0  -3    0.09    0.31
   8   0   3    0.14    0.39
   5   2   5  409.13   16.04
  -5   2  -5  401.09   14.42
   5   2   5  410.12   14.54
   5   2   5  413.95   15.45
   5   2   5  391.12   14.56
  -5   2  -5  398.31   14.77
   5   2   5  403.24   14.40
   5  -2   5  420.55   15.23
   5  -2   5  410.38   14.79
  -5   2  -5  407.41   14.53
   5  -2   5  376.90   14.11
  -5  -2  -5  423.86   15.41
  -2   1   8    3.60    1.83
  -2  -1   8    3.73    2.10
  -2   1   8    3.23    1.21
   2   1  -8    1.15    0.50
   2  -1  -8    2.72    1.05
   2   1  -8    3.47    1.27
  -2  -1   8    3.25    1.27
  -2  -1   8    1.58    0.88
   2   1  -8    1.42    0.95
  -2   1   8    1.43    0.60
   2   1  -8    1.30    0.43
   2  -1  -8    1.40    0.45
   2  -1  -8    1.11    0.34
  -2   1   8    1.40    0.34
   7   2  -1   15.11    1.01
  -7   2   1   18.69    2.29
   7   2  -1   19.56    2.49
  -7  -2   1   14.45    1.54
   7  -2  -1   18.56    2.25
  -7   2   1   14.26    0.86
  -7  -2   1   15.75    1.22
   7  -2  -1   15.04    1.08
   7  -2  -1   14.91    1.08
   7   2  -1   15.19    1.47
  -2   1  -8    4.28    0.67
  -2  -1  -8    4.53    1.94
  -2   1  -8    3.57    1.05
  -2  -1  -8    3.89    0.49
   2  -1   8    4.52    1.08
   2   1   8    5.49    1.18
  -2   1  -8    5.68    2.32
  -2   1  -8    5.97    1.23
   2   1   8    3.73    0.89
  -2  -1  -8    5.45    1.10
   2  -1   8    3.53    0.63
   7  -2   1  390.90   13.96
   7   2   1  361.42   14.54
   7  -2   1  361.25   14.85
  -7  -2  -1  386.37   14.61
  -7   2  -1  364.07   12.93
   7   2   1  367.86   13.67
   7  -2   1  377.56   13.60
  -7  -2  -1  380.43   13.78
   7   2   1  366.95   13.07
  -7   2  -1  363.07   12.77
   5   0  -7  187.30    7.94
  -5   0   7  182.54    7.26
  -5   0   7  193.64    8.57
   5   0  -7  183.02    6.66
  -5   0   7  187.96    6.97
  -7   0   5  265.39   11.18
   7   0  -5  244.41    8.95
   7   0  -5  265.45    9.45
  -7   0   5  267.53    9.59
   7   0  -5  271.12   10.99
  -7   0   5  265.57    9.95
   5   0   7  371.16   13.90
  -5   0  -7  374.38   13.97
  -5   0  -7  374.56   14.21
   5   0   7  362.00   12.89
  -5   0  -7  364.25   12.93
  -8  -1   2   47.50    2.73
  -8   1   2   51.64    2.23
   8  -1  -2   53.08    2.32
   8   1  -2   50.95    3.57
   8  -1  -2   50.96    2.17
   8  -1  -2   48.11    3.45
  -8   1   2   51.18    2.14
  -8  -1   2   50.18    3.88
  -8  -1   2   49.27    2.26
   8   1  -2   54.82    2.32
  -8   1   2   49.74    3.80
   8   1  -2   53.33    2.42
  -8  -1  -2   43.72    2.61
  -8   1  -2   43.54    1.94
   8  -1   2   41.72    3.45
   8   1   2   44.45    3.64
  -8  -1  -2   42.03    2.00
  -8  -1  -2   43.97    3.51
   8   1   2   44.80    2.02
   8  -1   2   43.38    2.12
   8  -1   2   44.54    1.97
  -8   1  -2   43.37    1.87
   8   1   2   44.34    1.92
  -4  -2   6   62.71    3.01
  -4   2   6   68.87    3.87
   4   2  -6   63.22    3.47
  -4   2   6   63.10    2.60
   4  -2  -6   63.39    2.86
   4   2  -6   61.10    2.81
  -4   2   6   65.28    2.62
   4   2  -6   71.55    3.77
  -4  -2   6   67.94    3.58
   4  -2  -6   69.65    3.68
   4  -2  -6   59.92    2.63
  -4  -2   6   68.50    4.54
   4   2   6   99.12    4.75
   4   2   6  106.84    4.10
   4  -2   6   96.58    4.07
   4   2   6  100.87    4.04
   4   2   6  101.21    4.67
  -4   2  -6   99.68    4.14
  -4  -2  -6   94.84    5.87
  -4   2  -6  100.11    4.07
  -4   2  -6  103.37    4.71
   4  -2   6   95.30    4.54
   4   2   6  104.83    4.32
  -4   2  -6  102.80    4.90
   6   2  -4   18.18    2.02
   6  -2  -4   14.30    1.05
   6  -2  -4   13.26    0.97
   6   2  -4   14.30    1.48
   6  -2  -4   18.21    1.85
  -6   2   4   14.46    0.85
  -6  -2   4   14.07    1.21
  -6   2   4   16.69    2.09
  -6   2   4   14.58    0.92
  -6   2  -4  184.33    6.94
   6   2   4  186.25    8.42
   6  -2   4  182.88    7.49
   6  -2   4  193.47    7.40
   6   2   4  201.00    7.63
   6  -2   4  196.12    7.44
   6   2   4  195.00    7.20
  -6   2  -4  191.76    7.00
  -6  -2  -4  200.38    7.77
   6   2   4  184.01    7.39
  -2   2   7  149.04    7.00
  -2   2   7  155.58    5.76
   2  -2  -7  154.18    5.85
   2   2  -7  147.30    5.77
  -2  -2   7  132.75    7.21
  -2  -2   7  171.25    7.22
   2   2  -7  153.57    7.23
   2  -2  -7  146.25    6.29
  -2  -2   7  150.83    6.96
   2   2  -7  160.51    6.85
  -2   2   7  157.63    5.78
   2   2  -7  161.28    6.39
   2  -2  -7  147.82    5.99
  -2   2   7  158.00    6.94
   2   2   7   33.94    1.61
  -2  -2  -7   32.92    1.82
  -2   2  -7   29.33    1.69
  -2   2  -7   40.01    3.95
  -2  -2  -7   43.31    2.62
  -2   2  -7   34.46    2.39
  -2  -2  -7   37.43    3.03
   2   2   7   40.15    2.46
   2   2   7   33.76    1.83
   2  -2   7   43.21    2.79
  -2   2  -7   33.83    1.88
   2  -2   7   30.99    1.82
   2   2   7   35.26    1.95
  -2   2  -7   45.80    2.72
   7  -2  -2  306.27   12.44
   7   2  -2  312.87   12.64
  -7   2   2  304.30   12.76
  -7   2   2  324.99   11.44
   7   2  -2  324.27   12.19
   7  -2  -2  311.54   11.26
   7   2  -2  317.18   11.39
  -7  -2   2  309.67   11.35
  -7  -2   2  296.37   11.46
   7  -2   2   92.78    4.32
  -7  -2  -2  102.79    4.90
   7   2   2  102.11    5.61
   7  -2   2   98.21    5.53
   7  -2   2  101.92    4.23
   7  -2   2   98.52    4.03
  -7   2  -2   97.83    3.90
   7   2   2  101.99    4.48
  -7  -2  -2   97.92    4.16
   7   2   2   99.82    3.94
   0   3   5   37.19    1.95
   0   3   5   35.66    1.73
   0  -3  -5   34.84    1.93
   0   3   5   35.58    2.29
   0   3  -5   38.68    3.73
   0  -3   5   36.75    1.96
   0  -3   5   35.08    2.66
   0   3   5   39.19    3.29
   0  -3  -5   35.31    1.96
   0   3  -5   34.85    1.91
   0   3  -5   37.76    2.44
   3   3  -4    0.46    0.86
   3  -3  -4   -0.27    0.47
  -3   3   4    0.23    0.43
  -3  -3   4    0.71    1.78
  -3   3   4    0.45    0.90
  -3   3   4    0.25    0.45
   4   3  -3  105.99    4.34
  -4   3   3  100.96    5.58
  -4   3   3  113.11    4.39
  -4  -3   3  107.55    6.13
   4   3  -3  112.99    5.22
   4   3  -3  107.31    5.18
  -4  -3   3  113.31    6.08
   4  -3  -3  106.89    4.86
  -4  -3   3  102.92    4.89
   4  -3  -3  107.61    4.48
   4   3  -3  118.47    4.92
  -4   3   3  116.97    4.52
  -3   3  -4    6.18    0.79
   3   3   4    9.81    1.79
   3  -3   4    6.59    0.87
   3   3   4    6.66    0.93
  -3   3  -4    6.03    0.80
   3   3   4    6.06    0.71
   3   3   4    8.78    1.10
  -3   3  -4   10.64    1.26
   3   3   4    5.68    1.07
   3  -3   4    9.94    1.36
   3   3   4    6.22    0.78
   4   3   3    0.71    1.32
   4  -3   3    1.04    0.62
   4  -3   3    1.21    0.59
  -4   3  -3    1.59    0.71
   4   3   3    1.24    0.52
  -4   3  -3    1.32    0.57
   4   3   3    1.60    0.92
  -4  -3  -3    1.60    1.43
   4   3   3    1.43    0.49
   4  -3   3    1.51    0.80
   4   3   3    1.58    0.70
   5   3   0   43.28    2.67
  -5  -3   0   42.09    2.64
  -5  -3   0   39.00    2.85
   5  -3   0   38.08    2.36
  -5  -3   0   42.48    3.60
   5   3   0   40.42    3.11
   5  -3   0   44.76    2.27
  -5   3   0   44.05    2.11
   5   3   0   44.75    2.31
  -5   3   0   43.82    2.01
   5  -3   0   44.19    2.25
   5   3   0   43.36    2.15
  -6  -1   6   27.15    1.56
   6   1  -6   28.03    1.42
  -6  -1   6   26.50    2.05
   6   1  -6   28.10    1.76
   6   1  -6   28.41    2.32
  -6   1   6   27.12    1.50
  -6   1   6   25.19    1.23
   6  -1  -6   26.96    1.34
   6  -1  -6   29.45    2.32
  -6   1   6   29.41    2.60
  -6  -1   6   29.26    2.78
   6   1   6   97.56    3.71
  -6   1  -6  101.26    3.86
   6  -1   6   98.04    4.04
   6   1   6   92.16    4.30
   6  -1   6   94.64    4.43
  -6   1  -6   93.06    3.86
  -6  -1  -6   99.81    4.10
  -1  -3   5    5.53    0.83
   1  -3  -5    6.38    1.16
   1   3  -5    8.19    1.27
   1   3  -5    5.76    0.85
  -1   3   5    8.52    1.25
  -1   3   5    5.85    0.72
  -1  -3   5    5.34    1.12
   1   3  -5    5.34    1.19
  -1  -3   5    8.17    1.97
  -1  -3   5    7.43    2.97
   1  -3  -5    7.81    1.04
   1  -3  -5    6.33    0.85
  -1   3   5    5.45    0.59
   1   3  -5    8.59    1.93
  -1  -3  -5   89.63    3.87
  -1   3  -5   78.84    3.43
   1   3   5   83.25    3.55
   1   3   5   86.92    4.12
  -1  -3  -5   82.18    3.60
   1  -3   5   83.13    3.60
   1   3   5   91.59    6.23
  -1   3  -5   89.26    4.30
   1  -3   5   87.62    4.55
   1   3   5   83.69    3.42
  -1   3  -5   81.96    5.54
   3   1  -8  332.84   11.94
  -3   1   8  326.75   11.61
  -3  -1   8  353.57   14.71
  -3  -1   8  319.19   12.14
  -3  -1   8  331.91   12.23
   3  -1  -8  323.32   12.39
  -3   1   8  325.65   11.88
  -3  -1   8  355.80   13.83
  -3   1   8  314.30   12.72
   3  -1  -8  326.34   11.59
   3  -1  -8  296.21   10.76
   3   1  -8  302.79   11.45
  -3   1   8  325.36   12.65
   3   1  -8  336.70   12.88
   5  -3  -1  129.40    5.61
   5  -3  -1  143.53    6.58
  -5  -3   1  139.18    6.13
   5  -3  -1  146.14    5.76
   5   3  -1  136.90    5.50
  -5   3   1  134.47    5.13
  -5  -3   1  142.58    7.27
  -5   3   1  143.60    5.48
   5   3  -1  147.80    5.75
  -5  -3   1  123.74    6.10
   5   3  -1  141.69    6.74
   5   3  -1  141.72    6.18
   5  -3   1   98.65    4.17
   5   3   1  100.46    4.14
   5   3   1   93.31    5.21
  -5  -3  -1   95.11    5.46
   5  -3   1   95.44    4.05
   5   3   1   92.42    4.43
  -5   3  -1   94.43    3.79
   5  -3   1   89.01    4.23
   5   3   1   93.91    4.00
  -3   1  -8   76.47    5.41
  -3   1  -8   81.08    4.08
   3   1   8   80.65    3.97
  -3   1  -8   85.19    4.17
   3  -1   8   84.08    3.81
  -3  -1  -8   74.96    3.10
   3   1   8   83.21    4.17
  -3   1  -8   81.47    3.41
   3   1   8   93.12    4.03
  -3  -1  -8   84.03    5.58
   3   1   8   80.31    3.25
   8  -1  -3   53.94    2.33
   8   1  -3   53.01    2.45
  -8  -1   3   52.56    2.94
   8   1  -3   58.95    3.83
   8  -1  -3   54.30    3.80
  -8   1   3   54.25    2.25
   8   1  -3   48.11    2.09
  -8  -1   3   54.99    4.72
  -8   1   3   55.62    3.96
  -8  -1   3   53.12    2.39
   8   1   3  311.73   12.87
  -8  -1  -3  300.48   11.59
   8   1   3  267.19    9.82
   8  -1   3  305.34   12.67
  -8   1  -3  310.45   11.04
   8  -1   3  303.30   10.81
   8   1   3  299.31   10.60
   8  -1   3  313.16   11.38
  -8  -1  -3  299.93   10.80
  -8   1  -3  310.98   10.98
   5  -1  -7    1.22    0.43
  -5   1   7    1.43    0.34
  -5  -1   7    2.52    0.67
   5   1  -7    1.85    0.44
  -5   1   7    1.30    0.54
   5   1  -7    1.56    0.71
  -5  -1   7    1.34    0.92
  -5  -1   7    1.89    1.44
  -5   1   7    2.94    1.22
   5   1  -7    2.71    1.14
   5  -1  -7    3.08    1.17
   5  -1  -7    1.44    0.38
  -4   0   8  314.76   12.46
   4   0  -8  287.14   10.19
  -4   0   8  282.26   10.28
   4   0  -8  299.69   10.83
  -4   0   8  287.12   11.81
  -4   0   8  278.92   10.64
   7  -1  -5    0.37    0.35
  -7   1   5    0.41    0.43
  -7  -1   5    0.94    1.45
  -7   1   5    0.16    1.28
  -7  -1   5    0.34    0.41
   7   1  -5    0.14    0.49
  -7   1   5    0.16    0.27
   7   1  -5    0.51    1.19
   7  -1  -5    0.10    0.36
   7  -1  -5    0.97    1.12
   7   1  -5    0.04    0.31
  -5   1  -7    0.29    0.88
  -5   1  -7    0.15    0.29
   5   1   7    1.17    0.83
  -5   1  -7    0.22    0.84
   5   1   7    0.31    0.24
  -5  -1  -7    0.15    2.91
  -5  -1  -7    0.17    0.44
   5  -1   7    0.20    0.81
  -4   0  -8  255.62   11.85
   4   0   8  283.23   10.40
  -4   0  -8  303.23   11.62
  -4   0  -8  300.09   11.57
   4   0   8  309.49   11.86
   7  -1   5   36.10    1.78
   7   1   5   34.65    1.56
  -7   1  -5   36.04    1.61
  -7  -1  -5   35.52    2.50
   7  -1   5   33.87    2.26
  -7   1  -5   34.58    1.72
   7   1   5   35.63    3.10
  -7  -1  -5   33.51    1.72
   7  -1   5   33.89    1.85
   7   1   5   32.46    1.75
   7   1   5   32.66    2.13
  -8   0   4  225.47    9.82
   8   0  -4  199.87    7.24
  -8   0   4  238.72    8.58
   8   0  -4  220.31    8.39
   8   0  -4  231.08    9.80
   8   0   4  383.40   13.44
  -8   0  -4  384.72   13.53
  -8   0  -4  385.45   13.64
   8   0   4  381.99   13.75
   0   0   9    0.44    1.81
   0   0  -9    0.04    0.30
   0   0  -9   -0.06    0.53
   0   0   9   -0.29    0.78
   0   0   9   -0.22    0.87
   0   0  -9    0.46    1.34
   0   0  -9    0.04    0.48
   3  -2  -7  120.93    4.69
   3  -2  -7  115.30    5.21
  -3   2   7  126.40    4.70
   3   2  -7  116.09    4.78
  -3  -2   7  126.37    5.62
   3  -2  -7  125.12    5.06
  -3   2   7  117.67    5.52
   3   2  -7  116.92    4.71
   3   2  -7  118.02    5.39
  -3  -2   7  117.67    6.59
  -3   2   7  121.32    4.61
  -3  -2  -7   17.80    2.49
   3  -2   7   17.05    1.72
   3   2   7   18.39    1.66
  -3   2  -7   17.20    1.57
   3   2   7   13.24    1.09
   3  -2   7   13.48    1.15
  -3   2  -7   13.74    1.05
   3   2   7   14.28    1.03
   3   2   7   13.41    0.89
  -3   2  -7   14.28    2.78
  -3   2  -7   13.90    1.13
  -3  -2  -7   14.03    1.10
  -3   2  -7   14.58    1.67
  -2   3   5    1.10    0.45
   2   3  -5    1.45    0.56
  -2   3   5    0.78    0.41
   2  -3  -5    1.17    0.61
   2   3  -5    1.32    0.93
  -2  -3   5    1.06    1.04
  -2  -3   5    1.58    1.18
   2   3  -5    1.41    1.22
   2  -3  -5    1.39    0.68
   2   3  -5    0.93    0.69
   2   3  -5    2.03    1.07
  -2   3   5    1.61    0.93
  -2  -3   5    0.44    2.08
   2  -3  -5    1.37    0.57
   2   3   5  190.72    7.45
  -2   3  -5  187.41    7.12
   2   3   5  182.72    8.16
   2  -3   5  200.05    7.65
   2   3   5  202.98    7.72
   2  -3   5  189.27    8.00
   2   3   5  194.75    7.85
  -2   3  -5  190.49    7.72
   2   3   5  192.11    7.15
  -2   3  -5  187.74    7.17
  -2  -3  -5  194.97    7.47
  -2   3  -5  179.79    9.19
   9   0   0    0.09    0.31
  -9   0   0   -0.08    0.46
  -9   0   0    1.17    1.42
   9   0   0   -0.16    1.38
   9   0   0   -0.20    0.29
   7   2  -3  102.08    4.63
   7  -2  -3  108.08    4.29
  -7   2   3  114.34    4.34
   7  -2  -3  104.28    5.26
  -7  -2   3  104.36    4.82
  -7   2   3  106.36    5.79
   7   2  -3  105.10    5.33
   7  -2  -3   93.03    3.78
  -7  -2   3  112.36    4.64
   7   2  -3  105.10    4.19
  -7   2   3  112.79    4.23
  -5  -3   2   23.52    2.76
  -5  -3   2   16.47    1.76
   5   3  -2   21.63    2.09
   5  -3  -2   23.30    1.93
  -5  -3   2   18.42    2.19
   5  -3  -2   17.13    1.23
   5   3  -2   16.73    1.63
  -5   3   2   15.11    1.02
  -5   3   2   16.03    1.02
   5   3  -2   17.83    1.31
   5   3  -2   15.53    1.14
  -1   0   9  460.16   16.94
  -1   0   9  503.31   19.66
   1   0  -9  466.11   16.32
   1   0  -9  488.95   17.39
  -1   0   9  454.57   18.32
   5   3   2   10.60    1.23
   5   3   2   11.27    2.37
   5   3   2   10.97    1.05
   5  -3   2   10.36    1.69
  -5  -3  -2   12.05    2.47
   5  -3   2   10.78    1.01
   5  -3   2   10.89    1.00
   5  -3   2   10.24    1.23
   5   3   2   11.05    0.99
   5   3   2   11.53    1.03
  -7   2  -3    2.05    0.40
   7  -2   3    2.73    0.66
   7   2   3    6.64    1.85
  -7   2  -3    1.17    0.42
  -7  -2  -3    4.12    0.77
   7   2   3    3.12    0.50
   7  -2   3    6.12    1.76
   7   2   3    1.90    0.56
  -7  -2  -3    3.70    1.02
   7  -2   3    6.44    1.10
   7  -2   3    3.82    0.74
   1   0   9 1194.83   44.64
  -1   0  -9 1135.65   39.49
   1   0   9 1049.84   37.00
  -1   0  -9 1065.48   39.10
  -1   0  -9 1137.27   39.98
   1   0   9 1076.00   38.01
  -9   0   1 1245.60   43.02
  -9   0   1 1277.45   46.00
   9   0  -1 1331.70   60.32
   9   0  -1 1279.00   45.81
  -9   0   1 1341.95   60.80
   9   0  -1 1223.82   44.97
  -9   0  -1  348.49   14.50
   9   0   1  336.39   11.86
  -9   0  -1  319.59   11.52
   9   0   1  328.08   14.15
   9   0   1  332.23   11.82
  -5   2   6  187.19    8.15
   5   2  -6  186.70    7.84
  -5   2   6  213.61    7.65
  -5  -2   6  178.83    8.21
   5  -2  -6  180.43    6.72
   5  -2  -6  188.26    7.85
   5  -2  -6  190.68    7.16
  -5   2   6  199.87    7.26
   5   2  -6  185.04    6.99
   5   2  -6  201.20    8.18
  -5  -2   6  193.34    7.50
  -5  -2   6  199.18    8.11
   6   2  -5  175.03    7.25
  -6  -2   5  158.60    7.25
   6  -2  -5  174.01    6.55
  -6   2   5  191.81    6.93
   6   2  -5  167.54    6.34
  -6  -2   5  192.54    7.43
  -6   2   5  167.31    7.63
   6   2  -5  176.00    7.59
   6  -2  -5  177.01    7.60
  -6   2   5  177.27    6.48
  -5   2  -6  265.11    9.55
   5   2   6  279.91   10.21
  -5  -2  -6  297.23   14.10
  -5   2  -6  283.17   11.10
   5   2   6  263.58   10.22
  -5  -2  -6  272.19   10.24
   5   2   6  275.06    9.92
   5  -2   6  269.03    9.95
   5   2   6  280.46   10.94
   5   2   6  271.13   11.31
  -5   2  -6  263.54    9.75
   5  -2   6  263.49   10.28
  -5   2  -6  275.14   10.57
   4   3  -4  205.42    8.38
  -4  -3   4  197.83    9.13
  -4  -3   4  196.39    9.38
  -4   3   4  193.89    8.56
   4   3  -4  200.54    8.37
   4  -3  -4  200.08    7.65
  -4   3   4  208.35    7.59
   4  -3  -4  148.71    5.89
  -4   3   4  195.31    7.18
   6   2   5   12.91    0.90
   6  -2   5   11.04    1.01
   6   2   5   31.12    2.86
   6   2   5   20.86    1.67
   6  -2   5   15.78    1.49
  -6   2  -5    8.69    0.89
   6   2   5    9.09    1.01
  -6  -2  -5   13.78    1.25
   6   2   5    9.87    1.03
  -6   2  -5    8.26    1.25
   6  -2   5   10.37    1.92
  -4   3  -4  169.12    8.15
   4   3   4  168.92    8.20
  -4   3  -4  166.33    8.08
  -4  -3  -4  190.61   10.69
   4   3   4  178.05    9.14
   4   3   4  170.27    8.61
   4  -3   4  174.25    8.53
   4  -3   4  171.04    8.83
  -4   3  -4  180.22    9.07
   4   3   4  168.28    9.31
   4   3   4  174.49    8.55
   4   3   4  175.71    8.49
  -2   0   9   -0.12    0.51
   2   0  -9   -0.14    0.51
  -2   0   9   -0.46    0.68
  -2   0   9   -0.29    1.16
   2   0  -9   -0.03    0.25
  -2   0   9    0.79    1.78
  -2   0  -9    0.13    0.56
   2   0   9   -0.03    0.95
  -2   0  -9   -0.29    0.75
  -2   0  -9   -0.37    1.74
   2   0   9    0.01    0.73
  -6   0   7   -0.11    0.78
   6   0  -7   -0.37    0.94
   6   0  -7   -0.13    0.29
  -6   0   7    0.38    1.11
  -6   0   7   -0.02    0.30
   7   0  -6   -0.16    0.36
  -7   0   6   -0.06    0.76
  -7   0   6    0.09    1.37
   7   0  -6    0.40    1.07
  -7   0   6   -0.07    0.29
   7   0  -6    0.03    0.29
   6   0   7   -0.21    0.83
  -6   0  -7   -0.02    0.26
  -6   0  -7   -0.19    0.59
   6   0   7    0.11    0.33
   7   0   6   -0.02    0.41
   7   0   6   -0.05    0.25
  -7   0  -6   -0.02    0.29
  -9   0   2    0.03    0.38
   9   0  -2    0.18    0.30
   9   0  -2    0.29    1.33
   9   0  -2   -0.17    0.29
  -9   0   2   -0.05    0.45
  -9   0   2    0.59    1.66
  -4   1   8   27.08    2.42
   4  -1  -8   25.90    1.55
   4  -1  -8   28.04    2.28
  -4   1   8   25.75    1.76
  -4  -1   8   27.62    2.15
  -4  -1   8   28.17    2.66
   4  -1  -8   26.96    1.60
  -4  -1   8   26.02    1.84
   4   1  -8   24.61    1.52
   4   1  -8   24.76    2.22
  -4   1   8   25.48    1.47
  -4  -1   8   27.48    2.92
  -4   1   8   26.21    2.63
   9   0   2   -0.13    0.28
   9   0   2   -0.04    0.38
  -9   0  -2    0.10    0.32
   9   0   2    0.32    1.77
  -9   0  -2   -0.01    0.28
  -9   0  -2   -0.54    1.33
  -4   1  -8    5.30    1.18
  -4  -1  -8    4.10    0.62
  -4  -1  -8    4.92    2.37
  -4   1  -8    3.93    0.98
   4  -1   8    3.46    0.65
   4   1   8    4.30    0.47
  -4   1  -8    4.00    0.68
  -4  -1  -8    4.08    0.61
  -4   1  -8    3.96    0.50
  -4   1  -8    1.97    2.58
   4   1   8    5.55    1.19
  -8  -1   4   14.01    2.35
  -8   1   4   12.53    2.12
   8  -1  -4   15.57    1.08
   8   1  -4   14.86    1.18
   8  -1  -4   14.11    1.97
   8  -1  -4   14.48    0.98
   8   1  -4   14.68    1.90
  -8  -1   4   13.57    1.47
  -8   1   4   16.15    1.04
  -8  -1   4   14.62    1.12
   8  -1   4   44.43    2.56
   8   1   4   47.13    3.87
   8  -1   4   44.03    2.91
   8  -1   4   44.10    3.64
   3   3  -5    0.99    0.90
  -3  -3   5    1.13    0.96
   3  -3  -5    1.54    0.72
  -3   3   5    1.06    0.46
   3   3  -5    1.50    0.72
   3  -3  -5    0.99    0.51
  -3   3   5    1.15    0.39
  -3  -3   5    1.15    1.86
   3   3  -5    1.68    0.56
   0  -1   9  132.15    8.29
   0   1  -9  148.59    8.66
   0  -1  -9  141.34    6.75
   0   1   9  121.61    7.72
   0   1  -9  129.19    6.45
   0   1   9  133.68    6.90
   0   1   9  146.32    7.74
   0   1  -9  150.07    7.80
   0  -1   9  143.85    7.68
   0  -1  -9  143.50    7.50
   0   1  -9  152.19    7.95
   0  -1   9  141.67    7.46
   0   1  -9  140.48    7.00
  -3   3  -5   58.28    3.20
   3   3   5   61.68    4.30
   3   3   5   57.21    3.06
  -3   3  -5   85.34    7.64
  -3   3  -5   57.98    3.20
  -3   3  -5   56.26    3.61
   3  -3   5   64.12    4.03
   3   3   5   61.36    3.36
   3  -3   5   65.93    3.69
   3   3   5   58.87    3.34
  -3   3  -5   62.89    3.76
   3   3   5   64.00    3.82
   5   3  -3  146.03    7.91
  -5   3   3  153.61    7.30
   5   3  -3  163.74    7.95
  -5  -3   3  155.61    8.85
  -5  -3   3  161.64    8.43
   5   3  -3  158.91    8.38
  -5   3   3  154.52    8.78
  -5   3   3  163.68    7.78
   5  -3  -3  161.68    7.92
  -5  -3   3  149.46    8.53
   5   3  -3  162.42    7.96
   5   3   3    1.83    0.57
   5   3   3    1.73    1.65
   5   3   3    2.32    0.59
  -5   3  -3    1.63    0.55
   5   3   3    2.07    0.57
   5  -3   3    1.83    0.76
   5   3   3    1.51    0.89
  -5   3  -3    1.58    0.51
   5  -3   3    2.02    0.61
   5  -3   3    2.26    0.64
   0   2  -8  676.00   23.33
   0   2   8  670.75   22.31
   0   2  -8  631.56   29.29
   0   2  -8  637.72   29.86
   0  -2   8  686.87   23.71
   0   2  -8  717.25   26.25
   0   2   8  603.19   29.45
   0  -2  -8  629.52   29.09
   0   2  -8  605.97   27.92
   0   2   8  608.22   28.51
   0   2   8  649.82   21.63
   0  -2  -8  654.27   21.93
   0  -2  -8  654.26   22.60
   0  -2   8  611.49   28.80
   9  -1   0  174.53    9.72
   9  -1   0  171.85    8.10
   9  -1   0  166.79    7.99
  -9   1   0  167.74    7.93
   9   1   0  164.56    7.98
   9   1   0  175.08    9.62
  -9  -1   0  174.74    9.84
  -9  -1   0  151.34    7.76
  -9   1   0  173.09    9.56
   9   1   0  167.03    7.88
  -9   1   0  172.92    8.11
  -1  -1   9   53.45    3.41
  -1   1   9   59.28    4.82
   1   1  -9   55.56    3.51
   1   1  -9   55.63    3.52
   1  -1  -9   55.92    3.53
   1  -1  -9   49.17    2.82
  -1  -1   9   58.95    3.86
  -1   1   9   52.34    2.91
  -1   1   9   54.57    3.58
   1   1  -9   54.43    3.01
   1   1  -9   53.09    4.00
   1   1  -9   53.11    3.02
  -1  -1   9   52.64    4.48
   1  -1  -9   56.29    2.92
  -1   1   9   50.06    3.01
  -1  -1  -9  121.71    6.49
   1   1   9  125.51    6.62
  -1  -1  -9  131.78    6.32
  -1   1  -9  109.84    5.69
   1  -1   9  166.13   11.25
  -1   1  -9  133.26    7.13
   1  -1   9  128.27    6.86
   1   1   9  122.94    8.02
  -1   1  -9  122.35    6.11
  -1  -1  -9  116.15    6.98
  -1   1  -9  138.87    8.47
   1   1   9  118.67    6.42
  -1   1  -9  127.22    6.73
   8  -2   0   92.45    4.72
  -8   2   0  107.62    6.48
  -8  -2   0   87.78    5.03
   8   2   0   88.79    4.73
  -8   2   0   93.22    4.55
  -8   2   0   83.94    4.17
   8  -2   0   91.16    4.68
   8   2   0  104.47    7.49
   8  -2   0  112.31    6.85
   8   2   0   86.37    4.33
   1   2  -8   21.99    2.79
   1   2  -8   26.41    2.28
  -1   2   8   15.52    1.08
   1   2  -8   17.81    1.79
   1   2  -8   17.53    1.41
   1  -2  -8   17.48    1.81
  -1   2   8   15.91    1.02
   1   2  -8   18.01    1.46
   1  -2  -8   16.85    1.22
  -1  -2   8   17.20    1.77
  -1   2   8   23.52    2.80
  -1  -2   8   23.16    2.45
   1  -2  -8   20.82    1.87
  -1   2   8   26.30    2.46
  -1  -2  -8   13.08    1.07
   1   2   8   13.83    1.06
   1   2   8   18.15    2.84
  -1   2  -8   22.17    3.14
   1   2   8   23.00    2.14
  -1   2  -8   26.30    2.17
  -1  -2  -8   18.99    1.83
   1  -2   8   14.37    1.20
  -1   2  -8   11.15    1.16
   1   2   8   13.51    1.21
   1  -2   8   13.04    1.45
   1  -2   8   22.23    2.20
  -1   2  -8   14.86    1.70
   1   2   8   13.01    0.99
   4   2  -7   20.97    1.99
  -4  -2   7   21.20    1.91
   4  -2  -7   19.72    1.32
   4   2  -7   17.43    1.77
  -4  -2   7   19.49    2.55
  -4   2   7   19.84    2.13
   4   2  -7   20.41    1.45
   4   2  -7   19.48    1.42
  -4   2   7   21.08    1.25
   4  -2  -7   18.67    1.86
   4  -2  -7   19.34    1.42
  -4   2   7   20.35    1.30
  -9   1   1    1.49    0.37
  -9  -1   1    6.90    1.95
  -9  -1   1    3.61    0.89
   9  -1  -1    6.62    1.67
  -9   1   1    2.10    0.42
   9  -1  -1    2.62    0.49
   9   1  -1    2.73    0.44
   9  -1  -1    2.71    0.47
   9   1  -1    2.42    0.53
  -9  -1   1    3.10    0.58
   9   1  -1    8.37    1.96
  -9   1   1    6.95    1.83
  -4   2  -7   39.10    2.35
  -4   2  -7   45.49    2.95
  -4  -2  -7   41.70    3.95
   4   2   7   37.10    2.13
  -4   2  -7   62.00    6.59
  -4   2  -7   41.74    2.36
   4  -2   7   44.90    3.04
   4  -2   7   40.56    2.43
   4   2   7   40.59    2.79
   4   2   7   40.56    2.38
   4   2   7   43.88    2.90
  -4   2  -7   41.94    3.05
   4   2   7   42.80    2.39
   0   3  -6   19.39    1.86
   0  -3  -6   20.29    1.51
   0   3  -6   18.11    1.38
   0  -3   6   20.82    1.53
   0   3   6   19.00    1.76
   0  -3   6   18.63    2.02
   0   3   6   20.06    1.28
   0  -3  -6   20.18    1.51
   0   3  -6   20.28    2.89
   0   3   6   20.39    1.46
   0   3   6   18.93    2.53
  -9  -1  -1   74.01    5.21
   9  -1   1   69.34    3.49
  -9  -1  -1   64.60    3.85
   9   1   1   70.96    3.58
   9  -1   1   68.30    3.57
  -9   1  -1   68.32    4.70
   9  -1   1   68.02    4.91
  -9  -1  -1   63.16    3.29
  -9   1  -1   70.88    3.55
   9   1   1   71.59    4.96
   9   1   1   70.80    3.53
   7   2  -4  138.56    7.15
  -7   2   4  125.53    7.35
  -7   2   4  140.65    6.69
  -7   2   4  130.41    6.18
  -7  -2   4  115.95    6.24
   7  -2  -4  124.35    6.08
   7  -2  -4  132.50    6.44
   7   2  -4  128.34    7.16
   7  -2  -4  133.83    7.37
  -7  -2   4  137.76    6.86
   7  -2   4    0.37    0.53
  -7  -2  -4    0.02    0.48
   7  -2   4    0.62    0.72
  -7   2  -4    0.14    0.43
   7  -2   4    0.58    1.15
   7   2   4    0.61    0.30
  -7   2  -4    0.07    0.34
  -7  -2  -4    0.95    0.62
   7  -2   4    0.66    0.55
   7   2   4    2.12    1.53
   7   2   4    0.43    0.42
   8  -2  -1  266.37   12.48
   8  -2  -1  250.59   13.04
  -8   2   1  259.14   13.44
  -8  -2   1  251.45   12.41
  -8   2   1  263.35   12.17
   8   2  -1  272.36   12.70
  -8  -2   1  250.09   11.90
   8   2  -1  254.31   13.11
   8  -2  -1  254.44   11.99
  -8   2   1  253.16   11.77
   8   2  -1  252.92   12.22
   5   0  -8    0.10    0.29
  -5   0   8   -0.11    0.30
   5   0  -8    0.15    0.97
  -5   0   8   -0.26    1.16
   5   0  -8    0.08    0.39
  -5   0   8   -0.63    1.27
  -5   0   8   -0.29    0.86
  -6  -3   0    3.85    1.73
   6   3   0    3.66    0.69
   6  -3   0    3.21    0.78
  -6  -3   0    3.11    1.01
   6   3   0    3.95    1.68
  -6   3   0    3.28    0.54
   6  -3   0    4.11    0.85
   6   3   0    2.76    1.00
   6  -3   0    3.60    0.69
   8   2   1  221.14   10.37
  -8  -2  -1  212.42   10.21
   8   2   1  216.56   11.52
   8  -2   1  218.00   10.42
   8  -2   1  221.95   10.50
   8  -2   1  214.12   11.58
  -8   2  -1  214.31   10.06
   8   2   1  220.16   10.62
  -8  -2  -1  216.18   10.85
  -5   0  -8    0.43    0.85
  -5   0  -8    0.23    2.80
  -5   0  -8    0.02    0.24
   5   0   8   -0.01    0.36
   5   0   8   -0.07    0.90
  -5   0  -8    0.31    0.68
   8   0  -5    0.01    0.25
   8   0  -5   -0.07    1.27
  -8   0   5    0.38    0.38
   8   0  -5   -0.09    0.38
  -8   0   5   -0.80    1.40
  -1  -3   6  114.21    6.17
   1   3  -6  112.92    6.95
  -1  -3   6  111.80    6.42
  -1  -3   6  149.93   10.47
   1   3  -6  107.33    5.88
  -1   3   6  111.63    5.40
   1  -3  -6  112.95    5.71
   1   3  -6   98.84    5.21
  -1   3   6  111.26    5.53
   1   3  -6  117.67    5.99
   1  -3  -6  115.52    5.90
  -1   3   6  103.01    6.17
  -1   3   6  111.97    6.11
   1  -3  -6  103.66    5.61
  -1  -3  -6   13.87    1.20
  -1   3  -6   11.63    1.60
  -1   3  -6   13.32    1.17
   1  -3   6   14.14    1.67
  -1   3  -6   15.10    1.55
  -1  -3  -6   13.63    1.19
  -1   3  -6   14.33    1.22
   1   3   6   13.00    2.52
   1   3   6   13.42    1.12
   1   3   6   13.77    1.00
   1  -3   6   13.54    1.17
   1   3   6   14.28    1.52
  -1   3  -6   15.39    2.65
   8   0   5   -0.06    0.38
   8   0   5   -0.07    0.27
  -8   0  -5    0.11    0.32
  -8   0  -5   -0.02    0.27
  -3   0   9  538.32   25.52
  -3   0   9  529.03   24.51
   3   0  -9  491.71   23.04
  -3   0   9  513.31   24.12
   3   0  -9  542.31   24.96
  -3   0   9  545.47   26.48
   6  -3  -1   29.97    1.95
   6   3  -1   31.06    2.43
   6   3  -1   29.41    1.93
  -6   3   1   28.96    1.69
  -6  -3   1   29.10    2.43
   6   3  -1   28.87    2.80
  -6  -3   1   30.05    3.17
  -6   3   1   28.69    1.72
  -6   3  -1   37.56    2.10
  -6  -3  -1   37.27    2.67
   6   3   1   37.92    2.27
   6  -3   1   41.04    2.46
  -6  -3  -1   35.17    2.28
   6  -3   1   33.16    3.11
   6  -3   1   37.81    2.30
   6   3   1   37.19    2.68
  -6  -3  -1   41.38    3.55
   6   3   1   38.33    3.27
   6  -3   1   39.38    2.67
  -3   0  -9    6.02    0.75
   3   0   9    1.12    0.77
   3   0   9   14.28    1.37
  -9   0   3    4.51    0.77
  -9   0   3    4.08    1.66
   9   0  -3    5.08    0.59
  -9   0   3    4.83    0.55
  -2   1   9   28.35    1.68
  -2   1   9   31.86    2.52
  -2  -1   9   33.09    2.71
   2   1  -9   29.34    1.79
   2  -1  -9   28.56    1.66
   2  -1  -9   33.40    2.45
  -2  -1   9   30.13    2.29
  -2   1   9   28.06    1.99
  -2  -1   9   33.16    3.57
   2   1  -9   28.14    1.83
   2  -1  -9   28.93    1.83
   2   1  -9   30.89    2.29
   2   1  -9   35.14    2.59
  -2   1   9   30.54    3.26
   2  -1   9    4.52    0.67
  -2   1  -9    4.18    0.68
  -2  -1  -9    4.69    1.97
  -2   1  -9    4.06    2.17
   2   1   9    3.93    0.94
   2   1   9    4.62    1.09
  -2  -1  -9    3.86    1.03
  -2   1  -9    4.40    1.17
   2  -1   9    3.93    1.03
  -2   1  -9    4.58    1.07
  -2  -1  -9    4.29    0.53
   9   0   3  644.46   29.53
   9   0   3  685.30   22.64
  -9   0  -3  627.87   28.63
  -9   0  -3  613.81   28.11
   9   0   3  595.47   28.71
   6  -1  -7   23.81    1.43
  -6   1   7   24.73    1.64
   6   1  -7   25.25    1.53
   6   1  -7   24.51    2.22
  -6  -1   7   23.15    1.61
   6   1  -7   25.09    1.79
  -6  -1   7   21.97    1.92
   6  -1  -7   23.28    2.25
  -6   1   7   23.43    2.47
  -6  -1   7   22.48    2.67
  -6   1   7   22.85    1.35
   7   1  -6  135.36    7.35
  -7   1   6  124.04    7.16
   7   1  -6  136.55    6.75
  -7   1   6  130.83    6.38
   7  -1  -6  138.06    6.61
  -7  -1   6  133.01    6.97
  -7  -1   6  127.56    7.38
  -7  -1   6  128.06    6.30
   7   1  -6  133.45    6.41
  -7   1   6  126.62    6.03
   7  -1  -6  132.72    6.33
   7  -1  -6  128.93    7.09
  -6   1  -7   88.26    4.53
   6   1   7  100.60    5.48
   6  -1   7   93.14    5.16
   6  -1   7   99.18    5.02
  -6   1  -7   99.90    4.83
   6   1   7   94.27    4.55
  -6  -1  -7   97.52    4.98
  -6   1  -7   94.70    5.38
   2   2  -8  139.03    7.36
  -2  -2   8  125.60    7.85
   2  -2  -8  148.30    7.70
   2   2  -8  137.65    6.79
  -2   2   8  145.34    7.69
  -2   2   8  140.79    6.68
  -2  -2   8  146.52    7.67
   2  -2  -8  142.10    7.05
  -2  -2   8  132.62    7.31
  -2   2   8  148.91    8.40
   2   2  -8  155.58    7.70
   2   2  -8  142.72    8.06
   2   2  -8  153.32    7.97
   2  -2  -8  147.51    7.11
  -2   2   8  151.34    7.23
  -2   2  -8   67.29    5.48
  -2  -2  -8   63.69    4.46
  -2  -2  -8   66.10    3.55
  -2   2  -8   64.91    4.01
   2   2   8   68.59    3.58
   2   2   8   64.84    3.53
  -2  -2  -8   64.24    3.83
   2   2   8   65.83    3.52
  -2   2  -8   63.72    3.48
  -2   2  -8   70.76    4.16
   2   2   8   67.22    4.05
   2  -2   8   68.17    4.23
   2  -2   8   66.72    3.59
   7  -1   6    2.66    0.64
   7  -1   6    3.29    1.04
  -7   1  -6    2.52    0.47
  -7  -1  -6    3.70    0.61
   7   1   6    4.39    1.02
   7   1   6    4.43    0.48
  -7   1  -6    2.51    0.59
   7   1   6    7.08    1.84
   7  -1   6    2.76    0.66
   9  -1  -2    6.36    1.62
   9   1  -2    5.83    1.84
  -9   1   2    7.02    0.70
   9  -1  -2    6.94    0.69
  -9  -1   2    7.03    1.11
   9  -1  -2    7.35    0.68
   9   1  -2    7.64    0.78
  -9  -1   2    6.84    0.74
  -9  -1   2    5.47    1.82
  -9   1   2    7.55    0.65
  -9   1   2    8.13    1.83
   9   1  -2    7.38    0.66
   9   1   2  116.83    7.07
  -9  -1  -2  106.44    5.78
   9   1   2  112.78    5.56
   9  -1   2  113.92    5.66
   9  -1   2  108.42    6.77
  -9  -1  -2  106.75    5.27
  -9   1  -2  114.41    5.51
   9   1   2  113.22    5.43
  -9   1  -2  109.19    5.24
   9  -1   2  113.46    5.49
  -9  -1  -2  119.15    7.18
  -8   2   2   54.27    4.18
  -8  -2   2   51.19    3.35
   8   2  -2   55.05    2.90
   8   2  -2   56.28    4.14
   8  -2  -2   54.73    3.96
  -8   2   2   57.55    2.90
  -8  -2   2   57.64    3.20
   8  -2  -2   53.00    2.90
   8   2  -2   52.91    3.17
   8  -2   2  109.67    5.55
   8  -2   2  104.87    5.24
   8   2   2   97.44    4.79
  -8  -2  -2  101.21    5.19
   8   2   2  103.63    5.30
   8   2   2  105.39    6.47
   8  -2   2   98.28    5.36
  -8   2  -2  103.30    5.07
  -8  -2  -2  104.07    5.78
   8  -2   2  105.20    6.61
   2   3  -6    7.87    1.65
   2   3  -6    6.74    0.81
   2   3  -6    6.38    0.91
  -2   3   6    6.22    2.08
   2  -3  -6    7.50    0.86
   2  -3  -6    6.45    2.25
  -2   3   6    7.58    0.68
   2   3  -6    7.89    1.70
  -2  -3   6    7.68    2.27
   2  -3  -6    6.78    1.06
   2   3  -6    6.90    1.26
  -2  -3   6    6.68    1.27
  -2   3   6    7.34    0.71
   2   3   6   57.15    3.51
   2  -3   6   62.15    3.97
  -2   3  -6   45.20    4.21
   2  -3   6   39.20    2.39
  -2   3  -6   60.80    3.67
  -2  -3  -6   45.96    2.69
   2   3   6   39.19    2.17
   2   3   6   43.03    2.51
  -2   3  -6   36.03    2.19
   2   3   6   43.19    2.66
  -2   3  -6   46.58    2.70
  -2   3  -6   39.32    2.87
  -6   3   2  515.97   24.90
   6   3  -2  571.90   26.40
  -6   3   2  589.05   26.96
  -6  -3   2  565.57   26.23
   6  -3  -2  582.57   26.86
  -6  -3   2  504.96   24.31
  -6  -3   2  569.61   27.74
  -6  -3   2  579.57   27.29
   6   3  -2  589.68   27.69
  -6   3   2  548.56   25.08
   6   3  -2  569.35   27.18
  -6  -3  -2    0.08    0.62
   6  -3   2   -0.06    0.58
  -6   3  -2   -0.08    0.49
   6  -3   2   -0.42    1.13
   6  -3   2    0.50    0.59
   6  -3   2    0.10    0.68
   0   4   0   52.08    2.91
   0  -4   0   53.55    4.10
   0   4   0   44.48    3.91
   0   4   0   51.40    3.38
   0   4   0   50.68    2.85
   4  -3  -5  217.38   10.81
   4   3  -5  204.73    9.80
   4  -3  -5  214.61   10.33
  -4   3   5  216.37   10.13
   4   3  -5  213.22   10.31
  -4  -3   5  214.49   11.82
  -4  -3   5  214.92   11.36
  -4   3   5  224.06   10.47
   4   3  -5  220.51   11.04
   4  -3  -5  210.21   10.04
  -4  -3   5  221.57   11.14
  -4   3   5  210.84   10.88
   4   3  -5  203.48   10.31
  -5  -3   4   20.48    2.99
  -5   3   4   20.78    2.34
  -5  -3   4   19.45    1.91
   5   3  -4   21.30    2.05
  -5   3   4   20.71    1.29
   5  -3  -4   20.87    1.56
  -5  -3   4   19.28    2.46
   5   3  -4   20.27    2.19
  -5   3   4   21.52    1.33
   4   3   5    3.42    1.02
  -4   3  -5    3.34    0.95
   4   3   5    3.36    0.79
   4  -3   5    3.10    0.70
   4  -3   5    3.53    0.96
   4   3   5    4.37    1.12
  -4   3  -5    3.75    0.85
  -4  -3  -5    6.23    1.51
  -4   3  -5    2.63    0.61
   4   3   5    3.06    0.61
   4   3   5    3.95    1.54
   4   3   5    3.71    0.70
  -4   3  -5    2.55    0.56
   5  -3   4  120.52    6.05
   5   3   4  123.03    6.12
   5   3   4  126.07    6.24
   5   3   4  114.37    6.79
   5   3   4  119.04    6.44
   5   3   4  124.08    6.20
  -5   3  -4  116.19    5.71
   5  -3   4  129.77    6.50
  -5  -3  -4  128.52    8.67
   5  -3   4  121.32    6.51
  -5   3  -4  115.42    5.77
   0   4   1   17.78    2.50
   0   4  -1   21.50    2.84
   0   4   1   26.39    2.29
   0  -4   1   27.51    2.90
   0   4  -1   26.86    2.19
   0  -4   1   14.50    1.24
   0   4  -1   13.24    1.63
   0   4  -1   15.10    1.23
   0   4   1   15.31    1.28
   0   4   1   15.84    1.25
   0   4  -1   16.88    1.30
   1   4   0  341.81   16.00
  -1   4   0  332.16   16.06
   1   4   0  338.46   16.53
   1   4   0  325.91   16.44
   1   4   0  341.08   15.96
  -1   4   0  348.78   16.30
  -1   4   0  411.46   22.20
  -1  -4   0  343.32   17.45
   1   4   0  339.50   16.40
  -1   4   0  344.64   16.11
  -5  -1   8    7.99    1.67
   5   1  -8    6.59    0.66
   5  -1  -8    6.99    0.67
   5   1  -8    7.50    1.31
  -5   1   8    5.85    1.42
  -5  -1   8    5.50    1.78
  -5   1   8    7.73    0.88
  -5  -1   8    7.94    1.21
  -5  -1   8    7.24    0.87
  -5   1   8    6.87    0.62
   5  -1  -8    6.95    0.65
   5  -1  -8    6.25    1.20
   5  -1   8   52.17    2.93
  -5   1  -8   53.00    3.29
  -5   1  -8   52.10    3.40
  -5   1  -8   56.65    2.88
   5   1   8   54.88    2.78
  -5   1  -8   45.61    2.63
  -5  -1  -8   50.00    4.74
   5   1   8   53.36    3.35
   5  -1   8   47.16    3.08
   8  -1  -5    4.18    0.55
   8  -1  -5    5.81    1.51
  -8  -1   5    4.16    0.62
   8   1  -5    3.99    0.50
  -8   1   5    4.08    0.47
   8   1  -5    5.09    1.38
   8   1  -5    4.49    0.69
  -8  -1   5    6.32    1.75
  -8   1   5    4.88    1.51
  -8   1   5    3.98    0.58
   8  -1  -5    3.86    0.50
   6   2  -6   50.71    3.44
  -6   2   6   48.98    2.51
   6  -2  -6   48.67    3.27
   6   2  -6   45.21    2.51
  -6  -2   6   51.87    3.34
  -6   2   6   47.35    3.48
   6  -2  -6   46.24    2.58
   6   2  -6   53.99    3.37
  -6  -2   6   47.74    2.83
  -6   2   6   51.63    2.69
  -6  -2   6   48.92    3.63
   8   1   5    2.12    1.65
   8  -1   5    0.53    0.72
  -8  -1  -5    1.18    0.48
   8   1   5    1.67    0.36
  -8   1  -5    0.95    0.33
   8  -1   5    1.02    0.54
   8  -1   5    0.78    0.39
   8  -1   5    1.92    1.32
   8   1   5    2.09    0.47
   8   1   5    1.71    0.95
  -8   1  -5    1.18    0.39
  -1   4   1   12.41    1.08
  -1  -4   1   15.98    2.24
   1   4  -1   11.10    1.12
   1   4  -1   13.91    2.12
   1  -4  -1   11.86    1.20
  -1   4   1   10.74    1.06
  -1  -4   1   11.86    1.10
   1   4  -1   14.90    1.68
   1   4  -1   12.22    1.57
   1   4  -1   12.44    1.12
  -1   4  -1  120.23    6.44
   1   4   1  119.54    6.76
   1   4   1  123.70    6.61
  -1   4  -1  119.09    5.94
   1   4   1  122.16    6.09
  -1   4  -1  131.91    8.84
  -1   4  -1  122.53    6.10
   1  -4   1  123.98    6.23
   1   4   1  125.89    6.25
   1  -4   1  113.23    6.99
   1   4   1  116.62    6.88
  -1  -4  -1  111.95    5.67
   3   1  -9  165.20    7.90
   3  -1  -9  170.39    8.06
   3   1  -9  155.97    7.88
  -3   1   9  164.60    8.12
  -3  -1   9  168.73    8.61
  -3   1   9  165.25    9.15
  -3  -1   9  178.70   10.11
   3   1  -9  163.82    8.49
  -3  -1   9  169.44    8.94
   3  -1  -9  162.58    8.40
   3   1  -9  169.91    8.33
   3  -1  -9  160.03    7.68
  -3   1   9  153.59    7.38
  -3   1   9  160.86    8.48
  -6   2  -6   85.37    4.22
   6  -2   6   81.33    4.66
   6   2   6   91.00    4.48
  -6   2  -6   85.58    4.41
  -6  -2  -6   90.99    4.85
   6  -2   6   90.74    4.75
   6   2   6   90.09    4.99
   6   2   6   83.54    5.32
   3   1   9    0.11    0.69
  -3   1  -9   -0.31    0.82
  -3  -1  -9    0.15    0.76
   3  -1   9    0.22    0.38
   3   1   9    0.87    0.93
  -3  -1  -9    1.62    2.02
  -3   1  -9   -0.14    0.66
   3   2  -8  171.35    8.34
  -3   2   8  176.34    8.25
  -3   2   8  180.29    9.37
   3   2  -8  167.19    8.62
   3  -2  -8  164.95    8.47
   3   2  -8  171.88    8.33
   3  -2  -8  186.61    9.06
  -3  -2   8  157.66    9.32
  -3  -2   8  182.27    9.27
  -3   2   8  165.12    8.93
  -3   2   8  179.77    8.50
   3  -2  -8  172.33    8.22
   3   2   8   43.63    2.40
  -3   2  -8   42.62    2.44
   3  -2   8   45.99    2.68
  -3   2  -8   43.87    2.58
  -3   2  -8   43.39    4.33
  -3   2  -8   49.69    3.18
   3   2   8   45.99    3.03
  -3   2  -8   45.17    3.09
   3   2   8   43.21    2.52
  -3  -2  -8   45.38    3.83
   3  -2   8   43.09    3.02
  -3  -2  -8   41.01    2.43
   3   2   8   44.61    2.56
  -3  -2  -8   41.92    2.78
   9  -1  -3    0.75    0.37
   9   1  -3    0.55    0.34
  -9  -1   3    0.55    0.48
   9   1  -3    0.44    1.58
   9  -1  -3    0.73    1.21
  -9   1   3    0.92    0.34
  -9  -1   3    0.40    0.79
   9   1  -3    0.77    0.44
  -9   1   3    0.79    0.42
  -9   1   3    0.46    1.40
   9  -1   3   54.26    4.17
   9   1   3   54.83    4.16
   9   1   3   49.82    2.64
  -9  -1  -3   49.22    2.66
   9  -1   3   50.49    2.65
  -9   1  -3   51.91    2.70
  -9  -1  -3   52.25    3.34
   9  -1   3   52.13    2.88
  -9   1  -3   45.66    2.38
   9   1   3   51.01    2.63
  -8   2   3  138.47    4.90
   8   2  -3  134.08    5.39
   8  -2  -3  133.61    4.97
   8   2  -3  141.85    6.52
  -8   2   3  135.80    6.71
   8  -2  -3  133.87    6.23
  -8  -2   3  142.95    5.46
  -8  -2   3  128.68    5.50
   8   2  -3  138.51    5.06
  -4   0   9    0.69    1.28
  -4   0   9   -0.65    1.32
   4   0  -9   -0.21    0.99
  -4   0   9    0.00    0.74
  -4   0   9   -0.25    0.40
   4   0  -9   -0.09    0.24
   4   0  -9    0.31    0.44
   8  -2   3    9.17    0.89
  -8  -2  -3    9.00    1.22
  -8   2  -3    7.92    0.62
  -8  -2  -3    9.29    0.93
   8   2   3   14.96    2.24
  -8   2  -3    8.23    0.72
   8  -2   3    9.87    0.88
   8   2   3    9.30    0.72
   8  -2   3   14.02    2.05
   8   2   3    8.40    0.82
   8  -2   3   14.73    1.38
  -4   0  -9    0.15    0.35
   4   0   9   -0.05    0.38
  -4   0  -9    0.26    0.82
   4   0   9    0.21    0.80
  -4   0  -9   -0.08    0.54
  -4   0  -9    0.19    1.87
  -5  -2   7   76.63    3.76
   5   2  -7   77.21    3.75
   5   2  -7   75.64    3.13
  -5   2   7   70.94    3.94
   5  -2  -7   78.43    3.24
  -5   2   7   76.57    2.88
   5  -2  -7   72.51    2.93
   5   2  -7   71.53    3.72
  -5   2   7   75.39    2.94
  -5  -2   7   75.77    3.37
   5  -2  -7   72.46    3.69
  -5  -2   7   69.37    4.34
   9   0  -4   -0.30    1.26
  -9   0   4    0.11    0.57
   9   0  -4    0.04    0.34
  -9   0   4   -0.17    0.30
  -9   0   4   -0.82    1.41
   0   4  -2  496.07   16.87
   0   4   2  483.73   16.45
   0  -4  -2  478.27   16.73
   0   4  -2  495.93   19.06
   0   4   2  478.63   18.96
   0   4  -2  544.03   18.42
   0   4  -2  516.15   18.26
   0  -4   2  494.84   16.90
   0   4   2  517.40   18.07
   0   4  -2  528.88   18.64
   0   4   2  506.43   18.96
   0  -4  -2  502.66   17.25
   0  -4   2  526.69   19.58
   0   4   2  502.06   17.04
   3   3  -6  185.02    7.43
  -3  -3   6  217.71    8.54
   3   3  -6  183.95    6.74
   3   3  -6  190.68    7.17
   3  -3  -6  198.97    7.78
  -3  -3   6  175.01    8.45
  -3   3   6  195.42    6.88
   3  -3  -6  194.18    7.17
  -3   3   6  204.92    7.12
  -3  -3   6  200.49    8.51
   3  -3  -6  193.98    7.06
   3   3  -6  216.00    8.47
  -3   3   6  198.08    8.04
  -2  -4   0 1064.30   37.26
   2   4   0 1063.20   36.07
  -2   4   0 1101.27   38.97
  -2   4   0 1094.50   36.23
   2   4   0 1093.98   36.32
   2   4   0 1214.13   43.03
   2   4   0 1057.09   36.20
   7   2  -5    1.13    0.43
  -7   2   5    1.28    0.32
  -7   2   5    1.55    0.40
   7  -2  -5    1.55    0.47
   7   2  -5    1.23    0.78
  -7   2   5    1.51    1.38
   7   2  -5    2.15    1.20
   7  -2  -5    1.97    1.10
  -7  -2   5    1.94    0.64
   7  -2  -5    1.33    0.47
  -5   2  -7    9.34    1.19
  -5   2  -7    8.63    0.87
  -5  -2  -7    9.37    2.30
   5  -2   7    8.96    0.87
   5   2   7   10.21    0.91
  -5   2  -7    8.51    1.27
   5  -2   7    8.25    1.14
   5   2   7    9.01    1.24
   5   2   7    9.33    0.70
  -5   2  -7    8.42    0.71
  -3   3  -6   78.94    5.71
  -3   3  -6   89.30    4.10
   3   3   6   85.70    4.01
   3   3   6   86.80    3.71
  -3   3  -6   83.03    3.44
   3   3   6   95.93    4.01
   3  -3   6   92.35    3.88
   3  -3   6   88.04    4.32
   3   3   6   83.76    4.63
  -3   3  -6   83.88    4.16
   3   3   6   83.26    3.27
  -3  -3  -6   84.25    3.59
  -3   3  -6   81.12    3.41
  -9   0  -4   -0.21    0.33
   9   0   4    0.22    1.43
   9   0   4   -0.16    0.41
  -9   0  -4   -0.00    0.32
   9   0   4   -0.13    0.28
  -6  -3   3   62.75    3.87
   6  -3  -3   69.95    3.01
  -6  -3   3   69.20    3.14
   6   3  -3   73.46    3.15
  -6   3   3   72.23    2.81
   6  -3  -3   70.02    3.06
   6   3  -3   69.41    3.90
  -6  -3   3   72.45    4.66
  -6   3   3   70.59    2.81
   6   3  -3   75.69    3.84
  -6  -3   3   70.22    3.66
  -6   3   3   69.79    4.29
   7   2   5    8.44    0.84
   7   2   5   10.93    1.33
   7  -2   5    8.99    0.94
   7   2   5   10.12    1.83
  -7   2  -5    7.44    0.77
   7   2   5    6.27    0.63
  -7  -2  -5    8.84    0.96
   7   2   5    8.73    0.67
  -7   2  -5    7.87    0.63
   7  -2   5   11.62    1.40
   7  -2   5    8.62    0.89
   6  -3   3  126.09    6.18
   6   3   3  124.58    6.20
   6   3   3  133.61    5.11
   6  -3   3  127.83    4.99
   6  -3   3  125.97    4.93
  -6   3  -3  117.21    4.38
   6   3   3  127.91    4.96
   6   3   3  123.73    5.36
   6  -3   3  117.14    5.06
   6   3   3  121.36    4.67
  -6   3  -3  119.79    4.59
   7   0  -7    1.96    0.51
  -7   0   7    1.30    0.86
  -7   0   7    2.33    1.49
   7   0  -7    1.60    1.05
   7   0  -7    1.76    0.40
  -7   0   7    2.00    0.42
  -7   0  -7    2.46    0.41
  -7   0  -7    2.28    0.80
   7   0   7    2.35    0.42
   1  -4  -2   49.80    2.46
   1   4  -2   51.79    2.43
   1   4  -2   60.10    3.27
  -1   4   2   54.23    3.02
  -1   4   2   56.97    3.18
  -1  -4   2   47.64    2.31
   1   4  -2   59.59    3.99
  -1   4   2   49.21    2.30
   1   4  -2   50.93    2.43
   1   4  -2   47.57    2.91
  -1  -4   2   63.19    4.11
   1  -4  -2   45.29    2.28
  -1   4   2   49.46    2.28
  -1   4  -2   63.85    3.40
  -1   4  -2   63.32    2.81
   1   4   2   64.10    2.85
  -1   4  -2   65.11    2.85
   1  -4   2   65.45    4.07
   1   4   2   65.42    3.24
   1   4   2   65.22    3.95
  -1   4  -2   68.94    3.48
   1   4   2   63.84    2.81
  -1  -4  -2   57.38    2.66
   1  -4   2   63.49    2.86
  -1   4  -2   59.77    4.50
   2   4  -1  166.79    6.96
  -2   4   1  168.40    6.25
   2   4  -1  166.31    6.20
  -2   4   1  167.76    6.16
   2   4  -1  170.78    6.55
  -2  -4   1  163.54    7.81
   2   4  -1  165.67    7.01
   2   4  -1  185.21    6.92
   2  -4   1  462.88   17.93
  -2   4  -1  494.01   16.83
   2  -4   1  505.41   17.39
  -2  -4  -1  484.43   18.28
   2   4   1  504.52   17.24
  -2   4  -1  475.24   16.21
   2   4   1  480.05   16.37
   2  -4   1  495.91   17.02
   2   4   1  463.97   16.53
  -2  -4  -1  468.47   16.08
  -2   4  -1  453.90   16.15
   2   4   1  453.64   16.78
   0   0 -10  283.03   11.51
   0   0  10  300.14   11.40
   0   0 -10  295.20   10.38
   0   0  10  279.71   10.43
   0   0  10  278.18   11.96
  -6   0   8   29.50    1.93
  -6   0   8   32.62    1.63
   6   0  -8   33.91    2.39
  -6   0   8   37.45    2.80
   6   0  -8   34.61    1.55
  -8   0   6    4.46    1.58
   8   0  -6    4.42    0.48
  -8   0   6    4.25    0.56
   8   0  -6    3.59    1.25
   8   0  -6    4.67    0.58
  -8   0   6    3.85    0.81
  -6   0  -8    7.16    3.55
  -6   0  -8    6.20    1.03
   6   0   8    8.05    0.71
   6   0   8    6.67    1.25
  -6   0  -8    6.64    0.57
   8   0   6   40.67    2.05
   8   0   6   40.22    1.73
  -8   0  -6   43.03    1.86
   1   0 -10    0.07    0.21
   1   0 -10    0.05    0.40
  -1   0  10    0.20    0.92
  -1   0  10    0.13    0.73
   1   0 -10    0.16    0.48
  -1   0  10    0.96    1.84
   1   0  10   -0.03    0.63
  -1   0 -10   -0.14    0.41
   1   0  10    0.24    2.23
  -1   0 -10   -0.27    0.84
   1   0  10   -0.15    0.84
  -1   0 -10   -0.27    1.47
  10   0   0  525.83   17.46
  10   0   0  503.78   17.28
 -10   0   0  464.89   15.84
  10   0   0  502.47   18.72
 -10   0   0  509.94   19.04
   0   3   7  104.46    4.73
   0  -3  -7   99.58    4.45
   0   3  -7  108.33    6.15
   0   3   7  105.53    3.93
   0  -3  -7  106.06    4.25
   0   3   7  104.00    5.87
   0   3   7  106.10    4.14
   0   3  -7   95.42    4.52
   0  -3  -7  100.66    4.11
   0   3  -7   98.96    4.00
   0  -3   7  106.42    5.16
   0   3  -7  109.91    4.87
   0  -3   7  108.22    4.31
  -2  -4   2   48.68    3.65
   2   4  -2   49.44    2.99
  -2   4   2   49.48    2.27
   2  -4  -2   47.39    2.35
   2  -4  -2   49.66    2.55
   2   4  -2   46.05    2.41
  -2   4   2   48.31    2.26
   2   4  -2   45.37    2.82
   2   4  -2   49.85    2.38
   2   4  -2   56.34    2.69
   2   4   2    1.21    0.51
   2   4   2    0.73    0.83
  -2   4  -2    1.03    0.52
   2  -4   2    1.29    0.61
   2  -4   2    1.82    1.15
   2   4   2    1.19    0.54
  -2   4  -2    0.79    0.54
  -2  -4  -2    0.97    0.57
  -2   4  -2    2.40    0.76
  -2   4  -2    4.02    3.17
   2   4   2    2.35    1.16
 -10   0   1    0.30    1.72
  10   0  -1   -0.45    1.45
 -10   0   1   -0.15    0.33
  10   0  -1   -0.08    0.35
  10   0  -1   -0.04    0.31
 -10   0   1   -0.03    0.46
 -10   0  -1   -0.02    0.46
 -10   0  -1    0.20    1.51
  10   0   1   -0.12    0.33
 -10   0  -1   -0.17    0.30
  10   0   1    0.25    1.53
  10   0   1    0.10    0.32
  -7  -3   0   91.52    3.92
  -7  -3   0  100.78    5.62
  -7  -3   0  110.21    5.03
  -7   3   0  110.94    4.08
   7  -3   0  111.50    4.43
   7  -3   0  114.95    4.55
   7   3   0  105.89    4.80
   7   3   0  105.79    4.14
   7  -3   0  101.16    4.47
   7  -3   0  103.34    5.42
   7   3   0  106.42    5.44
  -1  -3   7   21.67    4.16
   1  -3  -7   18.27    1.29
   1   3  -7   19.41    1.78
   1  -3  -7   17.33    1.49
  -1   3   7   19.51    2.31
   1  -3  -7   19.72    1.47
   1   3  -7   18.51    1.31
   1   3  -7   18.02    1.38
  -1   3   7   18.79    1.14
   1   3  -7   19.44    2.63
  -1   3   7   19.52    1.80
  -1  -3   7   18.44    2.01
  -1  -3   7   19.80    1.77
  -1   3   7   19.54    1.06
   0   4  -3   17.44    1.25
   0   4   3   14.36    1.13
   0  -4   3   28.42    3.74
   0  -4  -3   16.31    1.24
   0   4   3   14.40    1.04
   0   4  -3   12.32    1.55
   0   4   3   30.52    2.64
   0  -4   3   11.00    1.04
   0  -4  -3   11.70    2.81
   0   4  -3   25.93    3.02
   1  -3   7   16.20    1.20
  -1   3  -7   17.47    1.26
   1   3   7   18.52    2.74
  -1   3  -7   15.64    2.92
  -1  -3  -7   16.90    1.20
   1  -3   7   19.12    1.96
  -1   3  -7   20.53    1.70
  -1   3  -7   14.19    1.61
   1   3   7   15.55    0.92
  -1   3  -7   15.47    1.13
   1   3   7   15.93    1.15
   1   3   7   18.71    1.61
  -1  -3  -7   16.19    1.18
  -3   4   0  569.31   19.19
   3   4   0  553.99   19.57
   3   4   0  592.08   20.03
  -3   4   0  593.34   20.00
   3   4   0  604.51   20.72
   3   4   0  579.95   19.61
   3  -4   0  559.13   19.11
   3  -4   0  555.05   19.05
   3   4   0  538.93   19.47
  -3  -4   0  539.67   20.20
  -4   1   9   22.84    1.52
  -4  -1   9   26.95    2.35
  -4   1   9   25.08    2.44
   4   1  -9   29.33    2.20
  -4  -1   9   23.12    1.80
  -4   1   9   27.65    2.29
   4  -1  -9   25.95    1.32
  -4   1   9   23.04    1.19
  -4  -1   9   29.04    3.00
   4   1  -9   24.72    1.30
  -4  -1   9   25.63    1.64
   4  -1  -9   23.34    1.24
   4  -1  -9   23.63    1.90
   4   1  -9   24.02    1.65
   5  -3  -5   14.68    1.17
   5   3  -5   11.64    0.99
   5   3  -5   15.24    1.65
  -5  -3   5   25.34    2.78
   5   3  -5   14.56    1.17
  -5   3   5   26.85    2.42
   5   3  -5   28.80    2.26
  -5   3   5   10.61    0.76
  -5   3   5   11.66    0.79
  -5  -3   5   22.96    2.72
   5  -3  -5   13.59    1.06
   5   3   5  443.80   16.80
   5   3   5  458.92   16.37
   5   3   5  465.21   15.85
   5   3   5  464.84   15.89
  -5   3  -5  442.01   15.11
   5   3   5  479.94   16.42
  -5   3  -5  451.06   15.88
  -5   3  -5  447.48   15.28
   5  -3   5  456.45   16.27
   5   3   5  446.71   15.79
   5  -3   5  456.11   15.66
  -5  -3  -5  417.68   16.75
   4   1   9   70.70    3.54
   4   1   9   70.60    3.03
   4  -1   9   77.05    3.36
  -4   1  -9   70.83    3.12
  -4   1  -9   77.71    3.73
   4   1   9   67.48    2.77
  -4  -1  -9   69.81    4.96
  -4   1  -9   74.37    2.87
  -4  -1  -9   71.09    2.98
  -4   1  -9   73.35    3.71
  -7  -3   1  106.92    5.85
   7   3  -1  103.69    5.30
   7  -3  -1  105.22    5.28
   7   3  -1  113.04    5.03
  -7  -3   1  115.27    5.23
   7   3  -1  116.28    4.49
   7  -3  -1  113.88    4.50
  -7   3   1  120.08    4.36
   7  -3  -1  109.91    4.37
   7   3   1   21.20    1.81
  -7   3  -1   18.61    1.14
   7  -3   1   19.61    1.36
   7  -3   1   19.50    1.33
  -7  -3  -1   21.15    2.57
   7  -3   1   19.73    2.37
  -7  -3  -1   18.85    1.41
  -7  -3  -1   19.54    1.72
   7   3   1   19.07    2.40
   7  -3   1   18.98    1.57
  -7   3  -1   20.94    1.14
   7   3   1   19.17    1.25
  -4  -2   8    4.63    2.15
  -4  -2   8    4.85    1.12
   4  -2  -8    5.38    1.14
  -4   2   8    4.15    0.55
   4   2  -8    4.28    0.65
   4  -2  -8    4.79    0.69
  -4   2   8    4.57    1.16
  -4   2   8    4.30    0.45
   4  -2  -8    4.30    0.58
   4   2  -8    4.22    0.66
   4   2  -8    5.02    1.17
  -9  -1   4  113.12    4.31
  -9  -1   4  107.76    5.73
   9  -1  -4  108.00    5.25
   9   1  -4  110.03    4.21
  -9   1   4  114.28    4.14
   9  -1  -4  113.26    4.14
  -9   1   4  108.88    5.68
  -9  -1   4  102.37    4.52
   9  -1  -4  114.05    4.22
  -4   2  -8   78.70    3.96
   4   2   8   73.36    3.49
   4   2   8   79.69    3.80
  -4   2  -8   75.66    3.23
  -4   2  -8   82.10    5.90
  -4   2  -8   74.46    3.03
   4  -2   8   75.75    3.81
  -4  -2  -8   82.51    5.25
   4   2   8   79.15    3.32
   4  -2   8   82.52    3.53
  -4   2  -8   84.35    3.96
   4   2   8   78.46    3.08
   1   4  -3   50.71    3.01
  -1  -4   3   55.78    4.32
  -1   4   3   53.66    3.57
   1   4  -3   57.27    3.11
  -1   4   3   57.22    3.09
  -1  -4   3   55.03    2.56
  -1   4   3   53.47    2.44
   1   4  -3   58.17    3.93
   1   4  -3   55.82    2.59
   1   4  -3   49.49    2.38
   1  -4  -3   51.79    2.53
   1  -4  -3   51.96    2.50
  -1   4   3   52.80    2.36
   1  -4   3  454.60   15.60
  -1   4  -3  409.48   16.43
  -1   4  -3  452.67   16.18
   1   4   3  440.94   15.58
   1   4   3  455.75   17.10
  -1   4  -3  468.40   15.99
  -1   4  -3  462.28   16.42
  -1  -4  -3  443.14   15.29
   1   4   3  449.19   15.32
  -1  -4  -3  445.51   15.35
   1   4   3  435.48   14.92
   1  -4   3  454.70   16.98
  -3   4   1  281.03    9.82
   3   4  -1  283.39   10.73
  -3  -4   1  283.50   11.80
   3   4  -1  288.17   11.13
   3   4  -1  278.17   10.07
  -3   4   1  287.06   10.05
   3   4  -1  285.81   10.08
   3   4  -1  287.19   10.14
   3  -4   1  223.05    8.22
  -3  -4  -1  202.48    8.98
   3   4   1  188.79    7.65
  -3   4  -1  209.44    7.55
   3   4   1  204.29    7.42
   3  -4   1  205.66    7.57
   3   4   1  202.90    7.59
  -3   4  -1  209.50    7.56
   3   4   1  209.14    7.63
   3   4   1  194.57    8.62
  -9  -1  -4   65.85    2.74
   9   1   4   64.68    2.68
   9  -1   4   67.17    2.92
   9  -1   4   59.94    3.10
   9   1   4   66.27    4.25
   9   1   4   65.88    2.55
  -9   1  -4   60.41    2.38
  -9   1  -4   67.07    2.66
   9  -1   4   64.36    2.61
   9  -1   4   62.75    4.07
  -9  -1  -4   66.04    3.40
  -2   0  10  315.51   11.54
  -2   0  10  345.87   14.04
   2   0 -10  323.90   10.95
  -2   0  10  323.59   12.12
   2   0 -10  332.26   11.49
  -8  -2   4   20.68    1.39
  -8  -2   4   17.88    1.63
   8   2  -4   21.28    2.14
   8  -2  -4   19.62    2.00
  -8   2   4   20.47    2.47
   8  -2  -4   18.31    1.12
   8  -2  -4   17.87    1.14
  -8   2   4   15.35    0.86
  -8   2   4   18.56    1.04
   8   2  -4   19.85    1.54
   2   0  10   14.90    1.55
  -2   0 -10   15.06    1.91
   2   0  10   14.37    2.18
  -2   0 -10   15.22    1.18
  -2   0 -10   15.99    2.58
  -7   1   7   11.06    0.73
  -7  -1   7   11.95    1.99
   7   1  -7   11.83    1.60
   7  -1  -7   11.85    1.52
   7   1  -7   11.62    1.02
   7  -1  -7   11.05    0.74
   7   1  -7   12.02    0.84
  -7  -1   7   12.24    0.99
  -7   1   7    9.96    1.84
  -7  -1   7   11.21    1.35
  -7   1   7   10.68    0.94
   8  -2   4   33.48    1.78
  -8   2  -4   34.95    1.56
   8   2   4   33.18    2.93
   8  -2   4   34.97    1.88
  -8   2  -4   33.77    1.66
   8   2   4   32.38    1.61
  -8  -2  -4   36.39    1.97
   8   2   4   35.37    1.61
  -8  -2  -4   27.96    2.02
   8  -2   4   34.50    2.95
   8  -2   4   33.07    2.15
   0  -2   9   61.30    3.43
   0  -2   9   64.17    3.40
   0  -2  -9   63.36    2.68
   0   2   9   57.91    2.27
   0   2  -9   62.93    2.98
   0   2   9   56.77    4.15
   0  -2  -9   64.38    3.29
   0   2  -9   64.78    3.44
   0   2  -9   58.90    2.66
   0   2   9   66.82    2.84
   0   2  -9   71.89    4.74
   0   2   9   64.58    3.42
   0  -2  -9   63.15    2.80
   0   2  -9   65.02    3.36
  -7   1  -7    8.47    0.64
  -7   1  -7    7.42    0.73
   7  -1   7    7.86    1.14
   7   1   7    7.73    1.15
  -7   1  -7    8.56    1.19
   7  -1   7    8.52    0.80
  -7  -1  -7    8.23    0.79
   7   1   7    8.24    0.60
  -4   3   6  217.73    8.79
   4  -3  -6  215.88    7.90
   4   3  -6  213.69    7.85
  -4  -3   6  220.53    9.28
  -4  -3   6  244.10    9.40
   4   3  -6  233.19    9.03
  -4   3   6  239.56    8.23
   4  -3  -6  219.66    7.88
  -4  -3   6  217.11    9.85
  -4   3   6  239.60    8.25
   4   3  -6  212.83    7.67
   4  -3  -6  214.00    8.28
   4   3  -6  211.06    8.32
  -4   3  -6   15.90    1.45
   4  -3   6   15.83    1.58
  -4   3  -6   13.98    1.11
   4  -3   6   15.78    1.27
  -4  -3  -6   16.37    2.05
  -4   3  -6   17.24    3.94
  -4   3  -6   12.63    1.60
   4   3   6   14.19    1.46
   4   3   6   15.86    2.18
   4   3   6   14.02    0.95
   4   3   6   15.17    1.16
  -4   3  -6   14.14    1.04
   4   3   6   14.19    1.07
   4   3   6   15.83    1.46
  10   0  -2    0.54    0.36
  10   0  -2    0.47    0.38
 -10   0   2    0.72    0.62
 -10   0   2    1.48    1.60
 -10   0   2    0.61    0.35
   6   3  -4   81.06    4.20
  -6  -3   4   84.08    3.64
  -6   3   4   88.57    3.35
  -6  -3   4   80.25    5.14
  -6   3   4   87.95    3.31
  -6  -3   4   74.25    4.38
   6   3  -4   83.15    4.07
   6  -3  -4   82.75    4.07
  -6  -3   4   86.72    4.20
  -6   3   4   80.58    4.69
   6  -3  -4   84.68    3.56
 -10   0  -2  346.11   11.71
  10   0   2  341.40   11.49
  10   0   2  330.47   13.17
 -10   0  -2  337.09   11.64
 -10   0  -2  345.01   13.60
  10   0   2  342.75   11.73
   6   3   4   13.86    1.05
  -6   3  -4   13.83    1.03
   6   3   4   16.10    1.17
   6  -3   4   16.70    1.25
   6   3   4   14.65    1.04
   6  -3   4   14.27    1.16
  -6   3  -4   13.29    0.95
   6  -3   4   21.72    1.73
   6   3   4   22.74    2.56
   6   3   4   13.37    1.39
   9   2   0    5.49    0.77
  -9   2   0    4.97    0.55
  -9   2   0    7.90    1.84
   9  -2   0    4.48    0.66
  -9  -2   0    4.73    0.98
   9  -2   0    6.72    1.66
   9   2   0    6.96    1.84
   9  -2   0    5.84    0.66
  -9   2   0    3.82    0.44
   9   2   0    5.97    0.59
  -1   2   9  346.65   11.90
  -1   2   9  350.08   14.10
   1   2  -9  340.73   13.45
  -1  -2   9  355.78   13.02
  -1   2   9  320.91   10.80
   1  -2  -9  343.78   12.50
  -1   2   9  350.32   12.86
   1  -2  -9  343.53   12.10
   1   2  -9  364.43   12.76
   1  -2  -9  339.63   11.67
   1   2  -9  343.76   12.54
   1   2  -9  341.63   12.59
  -1  -2   9  326.61   12.30
   1   2  -9  336.45   11.91
   1  -2   9  309.72   11.63
  -1   2  -9  325.32   12.07
   1   2   9  347.14   12.02
  -1  -2  -9  326.28   11.30
   1  -2   9  346.04   12.02
  -1  -2  -9  340.23   12.38
  -1   2  -9  302.99   10.66
   1  -2   9  334.24   12.20
   1   2   9  325.69   11.03
   1   2   9  334.84   11.79
   1   2   9  319.47   13.69
  -1   2  -9  357.36   14.68
  -1   2  -9  338.19   12.31
   1   2   9  316.86   11.71
  -2   3   7   45.93    3.13
   2   3  -7   45.23    3.26
  -2  -3   7   40.48    3.70
   2   3  -7   46.48    2.28
  -2  -3   7   49.70    3.18
  -2  -3   7   48.79    2.83
  -2   3   7   49.75    2.06
  -2   3   7   46.24    2.79
   2   3  -7   46.83    2.75
   2  -3  -7   45.14    2.62
  -2   3   7   46.27    2.01
   2  -3  -7   49.09    2.44
   2  -3  -7   47.56    2.27
   2   3  -7   42.50    2.30
  -2   3  -7    6.72    1.08
   2   3   7    5.63    1.05
   2  -3   7    6.61    0.79
   2   3   7    5.70    0.71
   2   3   7    6.44    0.57
   2  -3   7    6.23    1.20
   2   3   7    6.39    0.85
  -2   3  -7    6.06    0.80
  -2   3  -7    6.34    0.77
  -2   3  -7    6.99    2.23
  -2  -3  -7    6.26    0.75
  -2   3  -7    6.47    1.31
   0  -1 -10    7.13    0.63
   0   1  10    7.47    1.12
   0  -1  10    9.74    1.50
   0   1 -10    9.71    1.28
   0  -1 -10   10.25    1.31
   0   1 -10    7.58    0.79
   0   1  10    8.64    1.34
   0   1 -10    8.55    2.14
   0   1 -10    6.90    1.18
   0   1 -10    6.41    0.76
   0  -1  10    9.80    2.59
   0  -1  10    7.07    1.25
   0   1  10    7.96    2.23
  -6   1   8    0.71    0.52
   6  -1  -8    0.85    0.42
   6  -1  -8    0.90    0.36
   6   1  -8    0.99    0.39
   6   1  -8    2.39    1.20
  -6  -1   8    1.51    0.56
  -6   1   8    1.07    0.32
  -6  -1   8    1.83    0.88
  -6  -1   8    1.63    1.39
  -6   1   8    1.90    1.27
   6  -1  -8    2.09    1.00
  -5   0   9   24.35    2.22
   5   0  -9   25.35    1.38
  -5   0   9   23.65    1.35
  -5   0   9   23.24    1.75
   5   0  -9   25.14    1.23
  -5   0   9   23.57    2.41
   5   0  -9   23.28    2.00
  -7   3   2    4.16    0.50
  -7  -3   2    4.58    0.86
   7  -3  -2    3.89    1.08
  -7   3   2    4.18    0.57
   7   3  -2    4.36    1.09
  -7  -3   2    3.87    1.05
  -7   3   2    4.15    1.34
  -7  -3   2    4.05    1.83
   7   3  -2    4.58    0.70
   7   3  -2    3.13    1.44
   7  -3  -2    4.12    0.72
  -9   2   1   10.88    0.77
   9  -2  -1   21.44    2.32
  -9   2   1   27.26    2.59
   9  -2  -1   15.08    1.09
  -9   2   1   13.44    0.89
   9   2  -1   25.20    2.89
   9   2  -1   13.93    1.14
   9  -2  -1   14.10    0.97
  -9  -2   1   15.70    1.52
   9   2  -1   14.17    0.92
  -7  -3  -2   17.78    1.61
  -7  -3  -2   20.54    2.49
   7  -3   2   21.32    1.41
  -7   3  -2   18.32    1.15
   7  -3   2   19.40    1.33
   7   3   2   18.95    1.65
   7   3   2   18.98    1.20
  -7  -3  -2   18.61    1.38
   7  -3   2   20.58    2.48
   7   3   2   19.13    2.20
   7  -3   2   21.66    1.71
  -9  -2  -1  120.21    4.69
   9   2   1  129.30    6.52
   9  -2   1  129.90    6.61
   9   2   1  129.87    4.72
   9  -2   1  122.43    4.71
  -9   2  -1  122.10    4.46
  -9  -2  -1  122.94    5.38
   9   2   1  124.09    4.77
   9  -2   1  125.95    4.73
   8  -1  -6   48.60    3.07
  -8  -1   6   49.96    2.26
   8  -1  -6   50.43    2.09
  -8   1   6   49.72    2.04
   8   1  -6   52.79    2.20
  -8   1   6   47.31    2.18
   8  -1  -6   49.37    2.10
   8   1  -6   49.64    2.30
  -8   1   6   49.88    3.41
  -8  -1   6   48.19    3.45
   8   1  -6   40.54    2.74
  -6   1  -8   39.10    2.36
  -6  -1  -8   38.42    1.99
   6  -1   8   36.11    1.86
  -6   1  -8   37.36    2.46
  -6  -1  -8   38.50    4.50
   6  -1   8   35.92    2.32
  -6   1  -8   33.85    1.77
   6   1   8   40.13    2.45
   6   1   8   35.94    1.55
  -6   1  -8   39.13    1.68
   5   0   9   -0.06    0.99
  -5   0  -9   -0.09    0.17
  -5   0  -9    1.54    2.37
  -5   0  -9    0.59    0.58
   5   0   9    0.66    0.45
  -5   0  -9    0.18    0.78
   9   0  -5    3.00    1.21
  -9   0   5    4.05    1.68
   9   0  -5    3.51    0.49
  -9   0   5    3.52    0.51
   9   0  -5    3.34    0.48
   8  -1   6   19.47    1.69
  -8  -1  -6   21.62    1.28
   8  -1   6   20.54    1.22
   8   1   6   18.89    1.65
   8   1   6   20.74    1.05
   8  -1   6   20.60    1.34
  -8   1  -6   21.15    1.20
  -8  -1  -6   18.87    1.62
   8  -1   6   16.52    2.09
   8   1   6   21.24    2.34
  -8   1  -6   21.36    1.08
   2   4  -3  132.24    5.37
   2   4  -3  130.91    5.74
   2   4  -3  140.58    5.46
   2   4  -3  119.38    5.30
  -2  -4   3  129.11    6.66
   2   4  -3  120.45    4.90
   2  -4  -3  132.28    5.24
  -2   4   3  128.99    4.83
   2   4  -3  117.58    5.89
   2  -4  -3  125.69    4.96
  -2   4   3  125.09    5.02
  -2   4  -3    1.73    0.64
   2   4   3    1.67    1.17
   2  -4   3    1.52    1.00
  -2   4  -3    2.36    2.13
   2   4   3    1.94    0.60
  -2   4  -3    1.64    0.75
   2   4   3    2.24    0.81
   2  -4   3    1.60    0.66
  -2   4  -3    0.86    0.92
   2   4   3    1.29    0.83
   2   4   3    1.75    0.63
   2   4   3    2.24    0.59
   3   4  -2    0.71    0.99
   3   4  -2    0.92    0.60
   3   4  -2    0.11    0.69
   3   4  -2    0.79    0.57
  -3   4   2    0.60    0.56
   3   4  -2    0.64    0.92
  -3   4   2    0.82    0.48
  -1   1  10   13.86    1.34
  -1  -1  10   12.97    1.40
   1   1 -10   15.55    1.20
  -1   1  10   14.72    1.66
  -1  -1  10   15.02    1.70
   1   1 -10   14.26    1.39
   1   1 -10   15.19    2.14
  -1   1  10   14.72    2.77
  -1  -1  10   14.08    2.60
   1  -1 -10   14.90    0.93
   1   1 -10   14.49    1.00
   1  -1 -10   14.03    1.10
   1  -1 -10   14.67    1.51
   1   1 -10   15.83    1.60
  -3   4  -2    3.59    0.74
   3   4   2    3.31    0.94
   3  -4   2    4.55    0.86
   3  -4   2    4.51    0.83
  -3   4  -2    4.00    0.70
   3   4   2    4.57    0.86
   3   4   2    4.83    0.69
   3   4   2    3.58    0.67
  -3   4  -2    7.68    1.01
   3   4   2    7.82    1.39
   3  -4   2    7.67    1.43
  -1   1 -10    4.49    0.71
  -1  -1 -10    4.36    0.49
   1  -1  10    3.90    1.12
   1  -1  10    5.67    3.14
   1   1  10    5.03    2.47
  -1   1 -10    5.20    2.19
  -1   1 -10    3.97    1.01
   1   1  10    3.76    0.97
  -1  -1 -10    4.61    1.71
  -1   1 -10    3.30    0.56
   1  -1  10    4.14    1.01
  -1  -1 -10    5.76    1.10
   1   1  10    5.28    1.16
  -1   1 -10    4.75    1.04
 -10  -1   0   60.32    4.14
 -10   1   0   60.76    2.46
 -10   1   0   59.06    3.92
  10   1   0   61.12    3.98
 -10  -1   0   57.61    3.03
 -10   1   0   60.71    2.40
  10   1   0   59.54    2.50
  10  -1   0   59.47    3.95
  10   1   0   64.05    2.52
  10  -1   0   64.53    2.55
  10  -1   0   60.75    2.57
  -9   0  -5    0.45    0.30
   9   0   5    0.64    0.45
  -9   0  -5    0.42    0.31
   9   0   5    0.86    1.43
   9   0   5    0.69    0.30
 -10   1   1   36.89    1.67
  10  -1  -1   37.04    1.71
 -10  -1   1   33.93    3.19
 -10   1   1   35.16    1.70
  10   1  -1   32.18    2.88
  10   1  -1   34.23    1.66
  10  -1  -1   36.28    3.12
 -10   1   1   36.42    3.23
 -10  -1   1   33.36    2.17
  10   1  -1   37.22    1.71
 -10  -1   1   38.24    1.87
  10  -1  -1   35.27    1.74
  10  -1   1   19.94    1.11
  10  -1   1   19.43    1.21
 -10  -1  -1   20.74    2.55
 -10   1  -1   17.50    2.29
 -10  -1  -1   18.23    1.55
 -10   1  -1   20.10    1.12
  10  -1   1   19.61    2.39
  10   1   1   16.65    2.37
  10   1   1   19.69    1.06
 -10  -1  -1   18.21    1.13
  10   1   1   17.59    1.03
   2   2  -9    1.00    0.55
   2   2  -9    1.15    1.27
  -2   2   9    0.57    1.33
   2  -2  -9    2.20    0.97
  -2  -2   9    0.93    1.23
  -2   2   9    1.32    0.94
   2  -2  -9    0.73    0.48
  -2   2   9    0.65    0.44
  -2  -2   9    0.14    0.84
   2   2  -9    0.66    0.90
   2   2  -9    2.44    1.07
   2   2  -9    0.36    0.50
   2  -2  -9    0.73    0.49
  -2   2   9    0.65    0.26
  -2  -2  -9   20.46    2.13
  -2   2  -9   23.36    1.85
   2   2   9   22.19    1.46
  -2   2  -9   22.86    1.94
  -2  -2  -9   22.35    1.38
   2   2   9   21.23    1.76
  -2   2  -9   22.47    3.14
   2  -2   9   21.56    1.96
   2   2   9   20.92    1.23
   2   2   9   21.43    1.27
  -2   2  -9   21.94    1.40
   2  -2   9   21.72    1.39
  -2  -2  -9   20.73    1.74
   6   2  -7   30.64    1.61
  -6  -2   7   29.56    2.82
   6   2  -7   31.77    2.37
  -6   2   7   34.34    2.72
  -6  -2   7   30.83    2.17
   6   2  -7   32.49    2.16
  -6   2   7   31.26    1.56
  -6  -2   7   30.02    1.83
   6  -2  -7   31.03    1.69
  -6   2   7   32.02    1.47
   6  -2  -7   32.86    2.33
   6  -2  -7   29.44    1.54
  -7  -2   6   18.28    2.07
   7   2  -6   20.23    2.06
  -7  -2   6   22.20    1.51
  -7   2   6   20.81    1.08
  -7   2   6   18.54    2.07
   7  -2  -6   19.53    1.21
   7  -2  -6   21.46    1.98
   7   2  -6   18.88    1.56
   7   2  -6   20.34    1.24
  -7   2   6   20.84    1.18
   3   0 -10   -0.18    0.40
  -3   0  10    0.02    0.76
  -3   0  10   -1.02    1.76
  -3   0  10    0.15    1.04
   3   0 -10   -0.10    0.89
   3   0 -10   -0.11    0.24
  -3   0  10    0.02    0.43
  -6   2  -7    1.90    0.87
   6  -2   7    2.46    0.94
   6   2   7    3.80    1.00
  -6   2  -7    2.38    0.86
  -6   2  -7    1.54    0.46
  -6  -2  -7    2.27    0.64
   6   2   7    2.64    0.41
   6  -2   7    1.27    0.52
   6   2   7    6.25    1.66
  -6  -2  -7    2.82    2.24
  -6   2  -7    1.26    0.51
  -7   2  -6   79.62    3.40
   7  -2   6   91.65    3.95
   7  -2   6   91.08    3.89
  -7   2  -6   92.71    3.65
   7   2   6   88.98    4.22
   7  -2   6   88.81    4.26
   7   2   6   89.60    5.03
  -7  -2  -6   93.41    4.14
   7   2   6   94.96    3.75
  -3   0 -10    1.32    1.91
  -3   0 -10   -0.24    0.44
   3   0  10   -0.05    0.65
   3   0  10    0.20    0.88
  -3   0 -10   -0.09    0.85
  -9   2   2   16.88    0.99
   9   2  -2   17.42    2.26
  -9   2   2   18.90    1.02
  -9   2   2   16.76    2.37
   9  -2  -2   16.82    1.14
   9  -2  -2   16.99    2.01
  -9  -2   2   18.08    1.26
   9   2  -2   17.48    1.06
  -9  -2   2   19.69    1.72
   9   2  -2   16.95    1.28
  -9  -2  -2   31.94    2.27
   9   2   2   30.91    1.52
   9  -2   2   29.27    2.94
   9  -2   2   30.67    1.73
  -9   2  -2   29.73    1.48
   9   2   2   28.69    1.58
   9   2   2   29.26    2.80
   9  -2   2   30.23    1.63
  -9   2  -2   28.26    1.36
  -9  -2  -2   29.08    1.70
   0   4  -4   -0.33    0.96
   0   4   4    0.43    0.46
   0   4   4    0.55    1.14
   0  -4  -4    0.55    0.59
   0  -4   4    0.51    0.57
   0   4   4    0.25    0.56
   0   4  -4    0.86    0.83
   0   4   4   -0.37    1.81
   0   4   4    0.18    0.41
   0  -4  -4    0.38    0.50
   0  -4   4    0.08    1.06
   0   4  -4    0.73    1.66
   2  -1 -10    5.84    0.69
  -2   1  10    5.21    1.23
   2  -1 -10    6.41    0.60
   2   1 -10    5.61    0.69
  -2   1  10    6.27    1.98
   2   1 -10    6.26    1.00
  -2  -1  10    6.01    1.36
  -2  -1  10    5.53    2.16
   2   1 -10    5.59    1.16
  -2   1  10    5.50    0.91
  -2  -1  10    5.92    1.11
   2  -1 -10    5.86    1.08
   2   1 -10    6.56    0.65
  -2   1  10    6.20    0.69
  -4   4   0    4.60    0.70
   4   4   0    4.81    0.87
  -4  -4   0    4.87    1.60
   4   4   0    5.20    1.43
   4   4   0    4.65    0.70
   4  -4   0    4.02    0.77
   4   4   0    5.23    0.79
   4  -4   0    4.98    0.79
   4   4   0    4.76    1.21
 -10   0   3   -0.08    0.36
 -10   0   3   -0.61    1.87
  10   0  -3   -0.36    1.20
 -10   0   3   -0.00    0.51
  10   0  -3    0.11    0.38
  -2   1 -10   24.60    1.88
  -2  -1 -10   22.96    1.23
  -2   1 -10   21.10    1.50
  -2  -1 -10   20.97    1.79
   2   1  10   21.85    1.76
   2  -1  10   23.03    1.88
  -2   1 -10   22.25    1.87
   2   1  10   22.18    1.86
  -2  -1 -10   20.79    2.59
  -2   1 -10   15.30    1.01
  10   0   3   -0.05    0.27
  10   0   3   -0.17    1.41
 -10   0  -3   -0.00    0.28
 -10   0  -3   -0.15    0.37
  10   0   3   -0.04    0.39
  -1   4   4  131.67    5.86
   1   4  -4  131.95    5.91
  -1   4   4  127.78    6.48
   1   4  -4  133.68    6.82
   1  -4  -4  128.86    5.30
   1   4  -4  138.27    6.23
  -1  -4   4  140.40    5.65
  -1  -4   4  133.31    6.61
   1  -4  -4  130.01    5.36
  -1   4   4  136.42    5.43
  -1   4   4  130.30    5.11
   3  -3  -7   20.98    1.33
   3  -3  -7   21.38    1.71
   3   3  -7   21.71    1.85
  -3   3   7   22.46    1.96
  -3  -3   7   22.72    2.34
  -3  -3   7   20.94    1.87
   3   3  -7   22.33    1.92
   3   3  -7   21.47    1.40
   3  -3  -7   21.13    1.40
  -3   3   7   23.14    1.24
  -3  -3   7   19.45    2.76
   3   3  -7   22.45    1.58
  -3   3   7   22.11    1.17
  -1   4  -4    1.50    0.59
  -1   4  -4    1.74    2.00
   1  -4   4    0.71    0.63
   1  -4   4    3.30    1.27
  -1   4  -4    4.09    0.95
   1   4   4    3.64    0.80
  -1  -4  -4    1.02    0.59
   1   4   4    1.46    0.46
  -1   4  -4    2.19    1.17
   1   4   4    4.10    1.41
  -1  -4  -4    2.19    0.65
   1   4   4    2.17    0.56
  10  -1  -2    2.25    0.47
 -10   1   2    2.62    1.52
  10   1  -2    2.36    0.44
 -10   1   2    1.89    0.46
  10   1  -2    1.74    0.46
 -10  -1   2    2.86    1.80
  10  -1  -2    1.96    0.41
  10  -1  -2    2.85    1.50
 -10  -1   2    2.83    0.93
   4   4  -1   73.26    3.84
  -4   4   1   68.07    2.97
  -4   4   1   70.52    3.07
   4   4  -1   68.25    3.07
   4  -4  -1   67.04    3.13
   4   4  -1   75.29    3.36
   4   4  -1   78.66    3.64
   4   4  -1   69.88    3.98
  -4  -4   1   69.04    4.68
  -3   3  -7   13.74    1.07
  -3   3  -7   11.71    2.66
  -3  -3  -7   13.51    1.11
   3   3   7   14.32    1.16
   3   3   7   14.00    1.11
  -3   3  -7   13.84    1.12
  -3   3  -7   14.64    1.69
   3  -3   7   16.10    1.66
  -3   3  -7   15.29    1.46
   3   3   7   14.16    1.51
   3  -3   7   13.58    1.14
   3   3   7   12.31    0.81
   4  -4   1   16.77    1.32
   4   4   1   15.31    1.18
  -4  -4  -1   20.28    2.32
   4   4   1   15.45    1.32
   4   4   1   14.99    1.62
   4   4   1   19.13    2.10
   4  -4   1   15.91    1.27
   4   4   1   17.47    1.27
  10  -1   2    8.83    0.72
  10   1   2    8.66    0.65
 -10  -1  -2    8.71    1.93
 -10  -1  -2    8.71    1.22
  10  -1   2    9.65    1.91
  10   1   2    9.25    0.72
 -10   1  -2    8.56    0.67
  10  -1   2    9.04    0.86
 -10  -1  -2    9.02    0.81
 -10   1  -2    8.76    0.67
  -7   3   3   32.25    1.51
   7  -3  -3   30.15    1.72
  -7   3   3   29.62    2.72
  -7  -3   3   28.69    2.40
   7  -3  -3   31.59    2.39
   7   3  -3   33.04    2.60
  -7  -3   3   34.61    3.24
   7   3  -3   32.05    1.74
   7  -3  -3   32.29    1.79
   7   3  -3   34.41    2.36
  -7  -3   3   32.78    2.37
  -7  -3  -3   26.55    1.73
   7   3   3   25.73    2.70
   7   3   3   24.49    1.85
  -7   3  -3   24.54    1.42
   7   3   3   26.89    1.49
   7  -3   3   26.03    1.63
  -7   3  -3   23.82    1.27
   7  -3   3   26.63    2.59
   7  -3   3   28.17    1.70
   7  -3   3   23.42    1.79
   3   4  -3    1.50    0.70
  -3  -4   3    3.86    2.78
   3  -4  -3    1.99    0.71
  -3   4   3    1.12    0.53
   3   4  -3    0.81    1.04
  -3  -4   3    2.53    1.70
  -3   4   3    1.60    0.53
   3  -4  -3    1.58    0.64
   3   4  -3    2.39    1.06
   3   4   3   36.71    2.03
   3  -4   3   35.12    2.03
   3   4   3   34.15    1.82
   3   4   3   32.97    2.77
   3   4   3   33.51    2.28
   3   4   3   31.45    1.92
   3  -4   3   33.38    2.52
  -3   4  -3   34.58    2.19
   5   1  -9   65.58    3.12
  -5   1   9   63.79    3.85
   5  -1  -9   67.24    2.81
  -5   1   9   61.77    2.94
  -5   1   9   64.04    2.67
  -5  -1   9   73.82    3.39
  -5  -1   9   68.68    4.09
   5   1  -9   70.89    2.96
  -5  -1   9   66.07    3.47
   5  -1  -9   71.97    3.80
  -5   1   9   67.45    3.92
   5  -1  -9   70.51    2.93
  -5   1  -9   66.52    3.04
  -5   1  -9   72.70    2.93
  -5  -1  -9   65.89    4.90
   5   1   9   61.78    2.62
   5  -1   9   65.36    3.00
  -5   1  -9   73.94    3.71
   5   1   9   72.16    3.66
  -5   1  -9   69.56    3.69
   5  -1   9   59.12    3.24
   5  -2  -8   28.91    1.63
   5  -2  -8   28.11    2.16
  -5   2   8   28.35    2.42
   5   2  -8   25.61    1.99
  -5   2   8   26.60    1.41
   5  -2  -8   27.76    1.47
  -5  -2   8   27.49    2.97
   5   2  -8   28.38    2.17
  -5  -2   8   28.24    1.76
   5   2  -8   27.73    1.54
  -5   2   8   26.02    1.26
   9  -1  -5   95.00    4.91
  -9   1   5   90.29    5.04
   9  -1  -5   95.08    3.79
   9  -1  -5   90.83    3.59
   9   1  -5   86.29    3.45
  -9  -1   5   91.84    3.80
   9   1  -5   93.75    4.00
  -9  -1   5   86.59    4.16
  -9  -1   5   92.38    5.28
  -9   1   5   93.55    3.66
   5   2   8   23.15    1.22
   5   2   8   22.40    1.80
  -5   2  -8   21.18    1.39
  -5   2  -8   22.32    1.25
  -5  -2  -8   21.70    2.71
  -5   2  -8   22.32    1.93
   5   2   8   22.63    1.39
  -5   2  -8   35.37    5.43
  -5   2  -8   21.15    1.70
   5  -2   8   20.13    1.76
   5  -2   8   20.98    1.39
   9   1   5   38.15    1.91
   9  -1   5   37.50    2.37
  -9   1  -5   38.02    1.78
   9  -1   5   37.71    1.98
  -9  -1  -5   36.45    1.84
  -9   1  -5   36.59    1.68
   9   1   5   38.34    1.72
   9  -1   5   37.22    1.81
   9  -1   5   36.52    3.10
  -8  -2   5    5.94    0.80
   8   2  -5    5.80    0.62
  -8  -2   5    4.69    1.81
   8  -2  -5    5.91    1.19
   8  -2  -5    5.20    0.64
   8  -2  -5    5.64    0.68
   8   2  -5    6.18    0.98
  -8  -2   5    4.17    1.06
  -8   2   5    5.89    1.61
  -8   2   5    5.02    0.49
   8   2   5   41.77    3.27
   8  -2   5   38.86    3.05
  -8  -2  -5   45.21    2.36
   8  -2   5   43.23    2.22
  -8   2  -5   40.56    1.97
   8   2   5   35.64    1.79
   8   2   5   46.78    2.06
  -8   2  -5   44.47    1.94
   8  -2   5   44.52    2.22
   8  -2   5   39.75    2.47
  -7   0   8   -0.03    0.38
  -7   0   8    0.03    1.44
   7   0  -8    0.33    0.94
   7   0  -8   -0.23    0.31
   3  -2  -9   96.58    4.56
  -3  -2   9   89.79    5.58
  -3   2   9   96.70    5.22
   3   2  -9   98.68    4.14
  -3   2   9   92.65    3.60
   3  -2  -9   96.79    4.16
   3   2  -9   90.89    3.88
   3   2  -9   99.50    4.72
  -3   2   9  101.00    4.97
  -3  -2   9  104.51    4.90
   3   2  -9   99.22    4.74
  -3   2   9   95.24    3.88
   3  -2  -9   92.87    3.77
   8   0  -7   -0.35    1.00
   8   0  -7   -0.13    0.28
  -8   0   7   -0.01    0.31
   8   0  -7    0.14    0.40
  -8   0   7   -0.04    1.33
  -3  -2  -9   92.34    3.98
  -3   2  -9   89.96    3.89
   3   2   9   90.72    4.38
  -3   2  -9   93.94    6.01
   3   2   9   95.64    3.80
  -3   2  -9   96.59    4.06
  -3  -2  -9   92.29    5.31
  -3   2  -9   91.21    4.48
   3   2   9   90.98    4.15
   3   2   9   89.11    3.81
   3  -2   9   91.52    3.91
  -3  -2  -9   91.60    4.34
   3  -2   9   89.01    4.48
  -3   2  -9   95.86    4.50
   7   0   8   -0.30    0.83
  -7   0  -8    0.03    0.29
   7   0   8   -0.07    0.30
  -7   0  -8   -0.02    0.23
  -7   0  -8    0.12    0.62
  -2   4   4  147.21    5.78
   2   4  -4  141.40    6.26
  -2  -4   4  140.71    7.00
  -2   4   4  142.37    6.46
  -2   4   4  142.05    7.16
   2   4  -4  139.28    6.23
  -2   4   4  145.67    5.64
   2  -4  -4  144.72    5.84
   2   4  -4  139.59    6.76
   2  -4  -4  156.96    6.38
   2   4   4   60.59    2.79
  -2   4  -4   58.29    4.68
   2   4   4   58.68    3.85
   2  -4   4   62.83    3.72
   2   4   4   61.40    3.00
  -2   4  -4   55.73    2.64
  -2   4  -4   60.84    3.21
   2   4   4   61.87    2.78
   2  -4   4   61.20    2.90
   2   4   4   60.29    3.17
  -2   4  -4   57.46    3.30
  -5  -3   6  328.80   13.53
  -5   3   6  332.26   13.36
  -5  -3   6  344.08    8.38
  -5   3   6  351.18    3.32
   5   3  -6  327.60   12.83
   5  -3  -6  337.23   13.06
   5   3  -6  330.23   12.29
   5   3  -6  337.24   12.44
   5  -3  -6  358.59    4.80
   5  -3  -6  338.64   12.49
  -5   3   6  362.55    3.45
   5   3  -6  370.26    6.25
   4   4  -2   75.16    4.15
   4  -4  -2   71.52    3.29
  -4  -4   2   75.64    5.08
   4   4  -2   78.61    4.04
  -4   4   2   77.47    3.29
   4   4  -2   79.50    3.67
  -4  -4   2   65.83    4.94
   8   0   7   -0.09    0.30
  -8   0  -7    0.11    0.29
  -8   0  -7   -0.17    0.65
   4   4   2   23.65    1.46
   4  -4   2   28.14    2.25
   4   4   2   23.40    1.91
   4  -4   2   25.48    1.62
   4   4   2   25.68    1.52
   4  -4   2   26.57    1.70
   4   4   2   24.70    1.66
   4   4   2   29.00    2.63
  -6  -3   5   31.30    2.88
  -6  -3   5   30.42    3.73
   6   3  -5   30.47    2.34
  -6   3   5   30.75    2.65
  -6  -3   5   29.64    2.25
   6   3  -5   25.86    1.55
  -6   3   5   32.40    1.52
   6  -3  -5   33.01    1.87
   6  -3  -5   30.07    2.19
  -6   3   5   30.86    1.50
   6   3  -5   34.42    2.40
   5   3   6    3.76    1.63
   5  -3   6    3.03    0.66
  -5   3  -6    3.61    0.99
   5   3   6    5.05    1.01
   5   3   6    3.40    0.56
  -5   3  -6    3.54    0.66
  -5  -3  -6   10.30    2.13
  -5   3  -6    2.97    0.56
   5   3   6    4.47    0.64
   5   3   6    4.26    0.77
  -5   3  -6    4.27    0.88
   5   3   6    6.42    1.17
   5  -3   6    4.79    1.06
   9  -2  -3    4.90    0.67
  -9   2   3    5.01    0.51
   9  -2  -3    6.75    1.59
   9   2  -3    5.72    0.61
  -9  -2   3    4.77    1.02
  -9   2   3    8.52    1.90
  -9  -2   3    7.33    2.36
   9   2  -3    5.73    0.84
  -6  -3  -5  133.45    8.91
   6   3   5   93.35    3.94
   6  -3   5   97.62    4.22
  -6   3  -5   93.96    3.95
   6   3   5   95.39    4.57
   6   3   5  101.58    5.50
   6  -3   5  106.21    4.92
   6   3   5   98.00    4.54
   6   3   5  102.55    4.27
   6  -3   5   95.02    4.07
  -6   3  -5   93.08    3.78
   6   3   5   97.02    4.00
   9  -2   3  157.74    6.66
  -9  -2  -3  175.86    7.50
   9  -2   3  166.59    8.01
   9  -2   3  173.85    6.69
  -9  -2  -3  171.69    6.75
  -9   2  -3  165.87    6.19
  -9   2  -3  166.40    6.29
   9   2   3  163.59    6.28
   9  -2   3  175.05    6.84
   9   2   3  186.39    6.94
   3   1 -10   10.45    0.93
   3   1 -10    9.94    0.77
  -3   1  10   10.37    0.81
  -3   1  10   12.29    2.22
   3  -1 -10   10.77    0.82
   3   1 -10    9.37    1.10
  -3  -1  10   10.84    1.33
  -3   1  10   10.79    1.20
  -3  -1  10   10.50    1.68
  -3   1  10   11.13    1.65
   3  -1 -10   10.50    0.84
   3  -1 -10   10.63    1.42
  -3   1 -10   44.82    2.01
  -3  -1 -10   52.08    4.08
  -3   1 -10   50.47    2.98
   3   1  10   48.01    2.81
  -3  -1 -10   45.57    2.69
  -3  -1 -10   47.76    2.13
   3   1  10   50.49    2.96
   3  -1  10   46.27    2.27
  10  -1  -3   38.95    2.98
  10   1  -3   38.37    1.89
  10   1  -3   37.24    1.71
 -10   1   3   38.56    3.32
 -10  -1   3   35.85    2.29
  10  -1  -3   37.52    1.80
 -10  -1   3   37.48    3.37
 -10   1   3   35.22    1.75
   4   0 -10   79.30    4.06
   4   0 -10   86.70    3.62
  -4   0  10   86.19    4.14
  -4   0  10   88.46    4.64
  -4   0  10   85.81    3.77
   4   0 -10   87.11    3.46
 -10  -1  -3    8.20    1.11
  10   1   3    7.74    0.66
  10  -1   3    7.46    1.97
  10  -1   3    7.98    0.84
 -10   1  -3    7.26    0.59
 -10   1  -3    8.25    0.65
 -10  -1  -3    7.78    0.72
  10  -1   3    8.07    0.72
  10   1   3    8.05    0.62
  -4   0 -10   29.97    1.57
  -4   0 -10   27.00    1.75
   4   0  10   29.04    2.15
   4   0  10   27.39    1.60
  -4   0 -10   26.83    3.28
   0   3  -8   87.94    3.79
   0   3  -8   88.38    4.39
   0   3  -8  101.13    5.99
   0  -3  -8   93.00    3.98
   0   3  -8   84.35    3.87
   0  -3   8  104.40    4.85
   0  -3   8   89.53    4.63
   0   3  -8   95.15    4.54
   0   3   8   90.02    4.38
   0  -3  -8   94.78    4.45
   0   3   8   80.51    3.22
   0   3   8   86.00    5.36
   0  -3  -8   93.76    4.00
   0   3   8   93.46    3.85
  10   0  -4   18.66    2.04
 -10   0   4   22.54    2.62
  10   0  -4   21.55    1.20
 -10   0   4   17.35    1.34
   6   0  -9   -0.34    0.39
   6   0  -9   -0.64    0.88
  -6   0   9    0.23    0.84
  -6   0   9   -0.96    1.16
  -6   0   9   -0.02    0.35
   6   0  -9   -0.23    0.28
  10   0   4   32.81    1.52
 -10   0  -4   31.98    1.66
  10   0   4   31.34    2.88
  10   0   4   32.93    1.75
 -10   0  -4   33.22    1.59
   8  -3   0    5.45    0.94
   8  -3   0    2.51    0.65
   8  -3   0    5.06    1.41
  -8  -3   0    2.02    0.99
  -8  -3   0    4.78    1.91
   8   3   0    2.29    0.51
   8   3   0    4.25    1.60
   8   3   0    1.98    0.82
   8  -3   0    2.44    0.65
   6   0   9   -0.03    0.38
   6   0   9   -0.23    0.79
  -6   0  -9    0.11    0.64
  -6   0  -9    1.04    2.59
  -6   0  -9    0.10    0.27
   9   0  -6    0.34    1.13
   9   0  -6   -0.19    0.29
  -9   0   6    0.21    0.34
   9   0  -6    0.10    0.44
  -9   0   6   -0.51    1.37
   1   3  -8    0.26    0.53
  -1  -3   8    0.88    0.91
  -1   3   8    0.49    0.30
  -1   3   8    0.58    0.32
   1  -3  -8    0.46    0.45
  -1   3   8    0.43    1.51
   1  -3  -8   -0.12    0.74
  -1   3   8    0.15    0.77
  -1  -3   8    0.88    3.08
   1   3  -8   -0.35    1.43
   1   3  -8    0.15    0.85
   1   3  -8    0.32    0.88
   1  -3  -8    0.63    0.53
   1   3  -8    0.82    0.60
  -1  -3   8    0.79    1.13
   1   3   8   11.76    2.27
   1   3   8   12.81    1.14
   1   3   8   13.80    1.48
   1   3   8   13.77    1.04
   1   3   8   13.01    0.83
  -1   3  -8   16.32    2.73
  -1   3  -8   12.01    1.50
   1  -3   8   14.70    1.67
   1  -3   8   13.76    1.10
  -1   3  -8   13.42    1.43
  -1   3  -8   12.47    1.06
  -1  -3  -8   13.65    1.10
  -1  -3  -8   12.76    1.29
   4   3  -7   65.53    2.97
  -4  -3   7   66.74    4.70
   4   3  -7   72.13    3.80
  -4   3   7   71.03    2.90
   4   3  -7   64.52    3.05
  -4   3   7   61.02    2.53
   4   3  -7   69.91    3.71
   4  -3  -7   66.49    3.45
   4  -3  -7   68.11    3.13
  -4   3   7   70.70    3.92
   4  -3  -7   67.30    3.01
  -4  -3   7   67.81    4.07
  -4   3  -7  107.50    4.91
   4   3   7  106.64    4.20
   4  -3   7  101.27    4.89
  -4  -3  -7  101.40    5.45
  -4   3  -7  120.07    7.86
  -4   3  -7  100.99    4.24
   4   3   7  109.47    5.00
  -4   3  -7  101.02    4.91
   4  -3   7  123.55    5.20
  -4   3  -7  102.33    4.26
   4   3   7  111.05    4.62
   4   3   7   98.97    5.30
   4   3   7  104.99    4.36
   4   3   7  104.13    4.83
  -9   0  -6    0.04    0.26
   9   0   6   -0.05    0.39
  -9   0  -6   -0.09    0.28
   9   0   6   -0.04    0.27
   7  -3  -4    7.30    1.17
   7   3  -4    3.65    1.16
  -7  -3   4    2.87    1.00
  -7  -3   4    7.44    1.97
   7  -3  -4    3.25    0.64
  -7  -3   4    4.64    1.30
  -7   3   4    2.80    0.44
   7  -3  -4    4.16    0.72
  -7   3   4    7.68    1.73
   7   3  -4    6.93    1.48
   7  -3   4  124.69    5.54
   7   3   4  118.29    6.13
   7  -3   4  117.82    6.05
   7   3   4  126.74    5.64
  -7   3  -4  118.45    4.75
   7  -3   4  129.86    5.29
   7   3   4  127.51    5.05
  -7   3  -4  122.03    4.75
  -7  -3  -4  120.93    5.14
   7  -3   4  127.64    5.22
   7   3   4  126.65    5.16
  -8  -3   1   19.17    2.55
   8   3  -1   20.12    1.26
   8   3  -1   21.12    2.32
   8   3  -1   21.20    1.82
   8  -3  -1   20.84    2.14
  -8  -3   1   22.95    1.91
   8  -3  -1   21.10    1.40
   8  -3  -1   21.11    1.39
  -8  -3  -1    0.47    1.52
   8  -3   1    0.53    0.64
   8  -3   1   -0.06    0.56
   8   3   1    0.59    0.43
  -8  -3  -1    0.47    0.58
  -8   3  -1    0.54    0.41
   8   3   1    1.30    1.29
   8  -3   1    0.08    1.37
   8  -3   1    0.46    0.54
  -8  -3  -1    0.24    0.76
   8   3   1    0.24    0.77
   0   4  -5   62.95    4.47
   0   4   5   62.97    2.74
   0   4  -5   63.86    3.60
   0   4   5   57.89    3.74
   0  -4   5   60.34    3.72
   0   4  -5   64.75    3.47
   0   4   5   62.52    3.29
   0  -4   5   65.06    3.00
   0  -4  -5   63.23    2.97
   0   4   5   63.69    2.89
   0  -4  -5   62.65    2.97
   0   4   5   65.61    4.50
  -3  -4   4   88.48    5.11
   3   4  -4   87.31    4.35
  -3  -4   4  123.90    8.55
   3  -4  -4   89.74    3.91
  -3   4   4   91.50    3.78
  -3   4   4   91.06    3.70
   3   4  -4   91.95    4.52
   3  -4  -4   94.32    4.12
  -4  -4   3    5.47    1.76
   4   4  -3    2.78    1.11
  -4   4   3    2.96    0.54
   4  -4  -3    2.40    0.66
   4   4  -3    3.77    0.85
   4   4  -3    4.68    1.20
   4  -4  -3    2.67    0.75
  -4  -4   3    3.36    1.90
   3   4   4   73.96    3.22
   3  -4   4   79.12    3.58
   3   4   4   79.50    3.53
   3   4   4   70.41    3.36
  -3   4  -4   72.45    3.62
  -3   4  -4  102.58    7.74
   3   4   4   74.03    3.76
   3   4   4   68.74    4.21
   3  -4   4   73.10    4.00
   3   4   4   72.81    3.60
   4  -4   3    3.53    0.80
   4   4   3    3.44    0.60
   4  -4   3    3.42    0.70
   4   4   3    3.31    0.58
   4   4   3    3.58    0.68
   4   4   3    5.51    1.54
   4  -4   3    6.46    1.20
   4   4   3    2.64    0.84
   5   4   0    5.88    0.76
   5  -4   0    4.88    0.79
   5   4   0    3.90    0.84
   5  -4   0    4.05    0.78
   5   4   0    6.94    1.70
  -5  -4   0    6.55    1.88
   5   4   0    4.84    1.13
   7   1  -8    2.60    0.67
  -7  -1   8    2.86    1.55
   7  -1  -8    2.65    1.06
   7  -1  -8    2.49    0.43
   7   1  -8    2.62    0.44
  -7  -1   8    2.41    0.59
  -7   1   8    4.68    1.52
  -7   1   8    2.98    0.45
  -8   1   7   60.53    3.92
   8  -1  -7   65.28    2.72
  -8  -1   7   63.09    4.07
   8   1  -7   67.66    3.08
   8  -1  -7   66.99    2.81
   8   1  -7   63.97    2.70
  -8   1   7   66.05    2.72
  -8  -1   7   59.76    2.72
   8  -1  -7   68.11    3.81
  -7   1  -8   68.59    3.71
  -7   1  -8   60.58    2.73
  -7   1  -8   66.30    2.70
   7   1   8   63.56    2.59
   7   1   8   65.37    3.40
  -7  -1  -8   66.06    3.00
   7  -1   8   58.62    3.16
   7  -1   8   65.47    2.94
   1  -4  -5  163.09    5.93
  -1   4   5  158.42    5.49
   1  -4  -5  161.01    5.87
   1   4  -5  155.07    7.17
  -1  -4   5  176.55    6.28
  -1   4   5  166.07    6.54
   1   4  -5  160.83    6.39
  -1  -4   5  158.42    6.96
  -1   4   5  152.52    6.77
   1   4  -5  162.32    6.55
  -1   4   5  169.58    5.97
  -8  -1  -7   18.08    1.20
   8   1   7   18.90    1.00
  -8   1  -7   17.74    0.78
  -8   1  -7   17.47    0.94
   8  -1   7   15.94    1.55
   8   1   7   18.22    1.64
   8  -1   7   18.00    1.22
   1  -4   5   59.55    2.63
   1   4   5   56.71    2.88
  -1  -4  -5   57.86    2.61
   1   4   5   56.48    2.48
  -1   4  -5   53.91    4.21
  -1  -4  -5   59.81    2.69
   1   4   5   52.37    3.43
  -1   4  -5   56.94    3.23
  -1   4  -5   59.56    3.08
   1   4   5   57.11    2.38
   1  -4   5   60.09    3.51
   5   4  -1    7.03    1.50
  -5  -4   1    5.84    2.29
   5   4  -1    4.74    0.87
  -5  -4   1    6.30    1.78
   5  -4  -1    4.34    0.76
   5   4  -1    4.10    1.11
   5   4   1   37.39    2.00
   5  -4   1   34.17    1.88
   5   4   1   32.53    1.70
   5  -4   1   40.12    2.76
   5   4   1   35.19    2.29
   5   4   1   35.17    2.76
   5  -4   1   36.07    2.93
   5  -4   1   36.82    1.97
   5   4   1   37.33    1.90
  -5  -4  -1   37.65    3.99
  -5  -4  -1   41.66    3.37
  -4   2   9   92.78    3.47
   4  -2  -9   95.57    3.54
  -4   2   9   93.85    4.72
   4   2  -9   96.36    3.67
  -4   2   9   87.98    3.12
   4  -2  -9  100.11    3.91
   4   2  -9   94.06    3.67
   4  -2  -9   97.64    4.36
  -4   2   9   95.91    4.52
   2  -3  -8  136.70    5.17
   2   3  -8  120.86    4.71
  -2  -3   8  122.43    5.58
  -2   3   8  120.02    5.18
   2   3  -8  124.70    4.70
   2  -3  -8  121.41    4.50
  -2  -3   8  115.34    6.65
  -2   3   8  131.26    4.52
   2  -3  -8  115.18    4.83
  -2   3   8  126.38    4.40
   2   3  -8  119.98    5.76
  -2   3   8  120.09    5.78
   2   3  -8  122.96    5.19
  -4   2  -9    2.28    0.93
  -4   2  -9    1.37    0.53
  -4  -2  -9    3.03    2.00
  -4   2  -9    0.24    2.01
   4  -2   9    2.63    1.21
  -4  -2  -9    2.42    0.56
   4   2   9    1.98    0.71
   4   2   9    2.35    0.36
   4  -2   9    1.86    0.67
  -4   2  -9    4.10    1.08
   4   2   9    3.60    1.08
   4   2   9    1.94    0.79
   2   3   8   69.36    2.68
   2  -3   8   66.73    2.83
   2   3   8   71.32    2.95
  -2   3  -8   71.53    2.98
  -2   3  -8   69.92    4.87
  -2   3  -8   65.17    2.80
  -2  -3  -8   72.48    3.06
   2   3   8   72.39    3.14
  -2   3  -8   75.54    3.81
   2  -3   8   70.21    3.66
   2   3   8   65.58    3.28
  -2   3  -8   71.91    3.44
   0   0  11   -0.37    1.02
   0   0 -11   -0.21    1.15
   0   0  11   -0.16    0.79
   0   0 -11    0.07    0.41
   9  -2  -4   26.08    2.17
   9  -2  -4   24.78    1.07
   9  -2  -4   25.38    1.12
  -9  -2   4   25.29    2.77
   9   2  -4   30.37    1.79
  -9   2   4   26.27    2.49
  -9  -2   4   24.92    1.74
  -8  -3   2    5.89    1.18
  -8   3   2    6.96    1.50
   8   3  -2    6.51    1.66
   8  -3  -2    7.88    1.40
   8   3  -2    5.56    0.65
  -8  -3   2    9.06    2.40
   8   3  -2    5.43    1.18
   8  -3  -2    5.89    0.75
   9  -2   4  193.51    8.29
   9   2   4  170.20    6.45
  -9  -2  -4  199.01    7.01
   9  -2   4  186.92    7.07
   9  -2   4  197.20    6.91
   9   2   4  206.29    6.84
   9  -2   4  204.46    7.01
  -9   2  -4  189.93    6.42
  -9   2  -4  199.04    6.55
  -9  -2  -4  198.09    7.64
   8  -3   2   13.63    1.28
   8   3   2   10.74    1.17
   8   3   2   10.72    0.80
   8  -3   2   11.06    0.96
   8   3   2   12.05    1.97
  -8  -3  -2    9.38    1.24
   8  -3   2   10.91    0.96
  -8  -3  -2    9.12    0.96
  -8   3  -2    9.47    0.73
  -8  -3  -2   14.29    2.22
   8  -3   2   13.67    2.01
  -7  -2   7   12.12    1.81
   7   2  -7   11.56    0.78
  -7   2   7   11.93    1.83
   7  -2  -7   12.30    1.41
   7  -2  -7   12.63    0.83
  -7   2   7   12.20    0.63
  -7  -2   7   12.92    1.10
   7   2  -7   12.28    1.22
   4  -1 -10   82.34    3.06
  -4  -1  10   81.26    3.45
   4   1 -10   83.82    3.56
   4   1 -10   90.98    3.35
  -4  -1  10   84.14    4.31
   4  -1 -10   83.44    3.15
  -4   1  10   82.78    4.63
   4  -1 -10   80.10    3.81
  -4   1  10   78.05    3.37
  -4   1  10   81.67    4.13
  -4   1  10   79.02    2.99
  -4  -1  10   79.93    3.71
  -1   0  11   55.26    3.11
   1   0 -11   56.13    2.43
   1   0 -11   53.04    2.43
   1   0 -11   52.67    2.08
  -1   0  11   52.35    2.80
   1   0  11   68.29    6.10
  -1   0 -11   50.53    3.65
   1   0  11   49.30    2.73
  -1   0 -11   53.60    2.40
   1   0  11   52.01    3.00
  -7   2  -7    6.26    0.67
   7  -2   7    7.92    1.13
   7   2   7    7.95    1.14
   7  -2   7    7.52    0.84
  -7   2  -7    7.18    0.57
   7   2   7    7.67    0.55
  -7  -2  -7    8.14    0.93
  -4  -1 -10   34.20    3.44
  -4  -1 -10   36.05    1.67
   4   1  10   34.90    2.17
   4   1  10   34.37    2.24
  -4   1 -10   36.60    1.56
  -4   1 -10   37.07    2.37
   4  -1  10   36.09    1.85
  -4   1 -10   33.99    1.80
 -11   0   0   -0.11    0.48
  11   0   0    0.03    0.32
  11   0   0   -0.03    0.34
 -11   0   0    0.24    1.47
   2   4  -5   43.10    2.26
   2  -4  -5   45.19    2.19
  -2  -4   5   52.40    3.56
  -2   4   5   49.58    2.86
   2   4  -5   47.30    2.74
   2  -4  -5   48.86    2.40
  -2   4   5   45.91    2.07
  -2   4   5   44.27    1.90
   2   4  -5   45.48    3.15
  -2   4   5   46.21    3.14
   2   4  -5   46.87    2.79
  10  -1  -4   22.00    0.89
 -10  -1   4   22.01    2.70
  10   1  -4   22.89    1.03
  10  -1  -4   23.69    1.00
 -10  -1   4   20.14    1.59
 -10   1   4   25.13    2.59
  10  -1  -4   23.45    2.10
  -2   4  -5    2.89    1.96
  -2   4  -5    3.33    0.91
   2  -4   5    3.17    1.32
   2   4   5    3.05    0.67
   2   4   5    3.12    0.51
   2   4   5    3.33    0.79
   2   4   5    3.39    0.80
  -2  -4  -5    3.39    0.64
   2  -4   5    3.68    0.72
   2   4   5    3.81    1.34
   5  -4  -2    0.11    0.56
   5   4  -2    0.40    0.58
  -5  -4   2   -0.37    1.25
   5   4  -2    1.25    1.22
   5   4  -2   -0.31    0.94
  -6   1   9   73.23    2.73
   6   1  -9   74.05    2.82
   6  -1  -9   71.33    2.70
   6  -1  -9   78.62    3.90
  -6  -1   9   79.31    4.26
  -6   1   9   73.71    4.00
   6  -1  -9   72.17    2.74
  -6  -1   9   77.37    3.23
   5   4   2  145.94    5.93
   5  -4   2  139.19    5.13
   5   4   2  143.92    5.37
   5   4   2  152.55    5.51
   5   4   2  140.32    6.43
   5  -4   2  147.84    5.45
   5   4   2  141.39    5.13
  -5  -4  -2  143.87    6.86
   5  -4   2  140.43    5.90
  10   1   4    3.90    0.47
 -10   1  -4    3.29    0.45
 -10  -1  -4    3.88    0.57
  10  -1   4    3.76    0.50
  10  -1   4    6.15    1.04
  10  -1   4    7.17    1.78
  10   1   4    4.20    0.53
 -10   1  -4    3.51    0.43
  10  -1   4    5.08    0.71
 -10  -1  -4    4.62    0.97
  11   0  -1   59.52    2.27
  11   0  -1   56.79    2.32
 -11   0   1   60.30    2.69
 -11   0   1   56.26    3.96
  11   0   1   74.91    2.92
 -11   0  -1   75.22    4.51
  11   0   1   75.99    2.77
 -11   0  -1   70.59    2.94
   0   2 -10  159.27    5.91
   0   2 -10  150.56    5.46
   0  -2 -10  164.67    6.43
   0  -2  10  150.33    6.26
   0   2 -10  157.09    6.31
   0   2  10  146.47    7.26
   0   2  10  157.88    5.73
   0  -2 -10  160.88    5.61
   0   2 -10  168.03    7.72
   0   2  10  143.94    5.42
   0   2  10  164.30    6.55
   0  -2  10  160.44    6.36
  -6   1  -9   35.79    1.82
  -6   1  -9   37.38    1.58
  -6   1  -9   34.98    2.31
   6  -1   9   31.95    2.13
   6   1   9   38.49    2.38
   6   1   9   34.60    1.49
   6  -1   9   36.40    1.87
  -6  -1  -9   32.94    3.49
  -6  -1  -9   39.40    2.04
   9   1  -6   14.62    0.77
   9  -1  -6   15.38    1.70
  -9   1   6   15.68    0.75
  -9  -1   6   13.88    0.90
  -9   1   6   15.33    2.03
  -9  -1   6   15.80    2.22
   9  -1  -6   15.79    0.83
   9   1  -6   14.19    0.92
   9  -1  -6   15.43    0.78
   6   2  -8   30.10    1.51
  -6  -2   8   32.99    1.88
   6  -2  -8   29.36    1.14
  -6   2   8   29.25    0.94
   6  -2  -8   30.56    1.58
   6  -2  -8   29.42    1.93
  -6   2   8   30.90    2.49
   6   2  -8   31.87    2.07
   9  -1   6   50.65    2.32
   9   1   6   49.24    2.23
  -9   1  -6   50.14    2.06
  -9   1  -6   53.16    2.07
   9  -1   6   51.08    2.15
   9  -1   6   51.66    3.53
   9  -1   6   53.55    2.84
   9   1   6   51.65    2.80
  -9  -1  -6   51.60    2.86
  -9  -1  -6   54.17    2.31
   9   1   6   54.29    2.09
   8   2  -6  144.67    5.58
   8  -2  -6  138.15    4.87
   8   2  -6  130.32    4.60
  -8   2   6  141.58    4.77
   8  -2  -6  134.10    4.73
   8  -2  -6  126.26    5.50
  -8   2   6  128.08    6.01
  -8  -2   6  132.34    6.35
   6  -2   8    8.02    1.27
   6   2   8    7.76    1.21
  -6   2  -8    5.68    1.05
   6  -2   8    3.01    0.64
   6   2   8    2.99    0.40
  -6  -2  -8    2.98    0.66
  -6   2  -8    6.73    3.93
  -6  -2  -8    5.14    2.04
  -6   2  -8    0.21    0.40
  -6   2  -8    2.23    0.39
  -6   2  -8    3.02    0.98
   8  -2   6    4.72    1.00
  -8   2  -6    3.09    0.55
   8  -2   6    2.86    0.60
  -8  -2  -6    4.36    0.77
  -8   2  -6    3.28    0.46
   8  -2   6    3.40    0.67
   8   2   6    3.89    0.43
   8   2   6    4.51    0.95
   1   2 -10   31.62    1.77
  -1  -2  10   30.10    2.14
  -1   2  10   28.86    2.06
   1  -2 -10   30.28    2.06
   1  -2 -10   27.98    1.35
   1   2 -10   31.10    1.75
   1   2 -10   30.02    2.14
  -1   2  10   30.87    1.67
   1  -2 -10   30.17    1.51
   1   2 -10   29.92    2.87
  -1   2  10   30.50    3.06
  -1  -2  10   27.43    2.23
   1   2  10   61.30    2.52
  -1   2 -10   64.21    4.53
  -1  -2 -10   67.12    3.30
   1  -2  10   59.41    3.07
   1   2  10   61.66    3.23
  -1  -2 -10   57.55    2.43
   1  -2  10   62.24    3.39
   1   2  10   59.75    2.73
  -1   2 -10   58.14    2.58
  -1   2 -10   58.76    2.76
  -1   2 -10   64.07    3.34
   1   2  10   57.33    4.57
  10   2   0  116.39    4.11
 -10  -2   0  100.60    5.47
  10  -2   0  116.22    5.83
 -10   2   0  110.89    5.54
 -10   2   0  103.83    3.68
 -10  -2   0  106.06    4.63
  10   2   0   92.50    3.57
  10  -2   0  108.02    4.06
  10  -2   0  110.04    3.99
   2   0 -11   -0.08    0.38
  -2   0  11   -0.59    1.03
   2   0 -11   -0.04    0.22
  -2   0  11    0.14    0.78
   6   3  -6    1.68    0.54
  -6   3   6    1.80    0.38
   6  -3  -6    1.19    0.56
   6  -3  -6    1.63    0.82
  -6   3   6    1.31    1.13
  -6  -3   6    1.40    1.47
   6  -3  -6    1.13    0.54
   6   3  -6    1.39    1.01
  -6  -3   6    0.68    1.64
   5   0 -10    0.12    0.26
  -5   0  10   -0.10    0.85
  -5   0  10    0.30    1.14
   5   0 -10    0.35    0.43
  -5   0  10   -0.08    0.43
   2   0  11   -0.02    0.71
   2   0  11   -0.10    1.11
  -2   0 -11   -0.20    0.40
  -2   0 -11    1.29    1.68
   6  -3   6    1.75    0.92
  -6   3  -6    1.34    0.48
   6   3   6    1.72    0.44
   6  -3   6    1.38    0.58
   6   3   6    1.59    0.52
  -6  -3  -6    1.29    1.61
   6   3   6    1.31    0.74
  -6   3  -6    1.73    0.55
   6   3   6    1.39    0.42
   6   3   6    1.20    0.89
   6   3   6    2.26    1.49
  -5   0 -10   -0.10    0.46
  -5   0 -10   -0.37    1.76
   5   0  10   -0.18    0.36
   5   0  10   -0.09    0.93
  10  -2  -1  115.98    4.18
 -10  -2   1  110.53    4.77
  10   2  -1  117.80    4.37
  10  -2  -1  119.76    4.38
 -10  -2   1  115.89    6.02
  10   2  -1  122.03    4.27
 -10   2   1  121.22    5.97
  10  -2  -1  117.49    5.76
 -10   2  -1    0.26    0.31
  10  -2   1    0.36    1.55
  10   2   1    0.29    0.42
  10  -2   1    0.45    0.44
 -10  -2  -1    0.59    0.76
  10  -2   1    0.80    0.54
  10   2   1    0.38    0.33
   3  -3  -8   26.08    1.71
  -3   3   8   26.44    0.94
   3   3  -8   26.04    1.43
   3   3  -8   24.94    1.75
  -3   3   8   23.80    1.80
  -3  -3   8   25.83    2.27
  -3   3   8   26.45    0.97
   3  -3  -8   24.77    1.19
   3   3  -8   23.92    1.25
  -3  -3   8   20.68    2.62
   3  -3  -8   25.30    1.32
  -3   3   8   24.11    2.08
   4   4  -4  115.37    5.07
   4   4  -4  125.74    5.34
   4  -4  -4  118.64    4.58
  -4   4   4  122.13    4.38
  -4  -4   4  103.28    6.02
   4  -4  -4  118.63    4.50
  -4  -4   4  128.89    6.34
  10   0  -5   -0.11    0.34
  10   0  -5   -0.00    0.40
 -10   0   5    1.00    1.58
   3   3   8    4.96    0.99
   3  -3   8    6.30    1.20
  -3   3  -8    6.50    1.08
  -3   3  -8    4.36    0.74
   3  -3   8    2.28    0.60
  -3  -3  -8    3.81    0.65
   3   3   8    2.36    0.37
  -3   3  -8    4.63    1.16
  -3   3  -8    2.63    0.56
   3   3   8    3.40    0.59
  -3   3  -8    4.87    2.44
   3   3   8    3.90    0.65
  -4   4  -4    9.50    1.10
   4   4   4    9.22    1.56
   4   4   4    4.83    1.10
   4   4   4    5.46    0.78
   4   4   4    8.19    1.02
   4   4   4    5.71    0.66
   4  -4   4    8.42    1.27
   4   4   4    6.04    0.84
   4  -4   4    4.39    0.81
 -11   0   2   -0.29    1.45
 -11   0   2   -0.15    0.47
  11   0  -2   -0.00    0.37
  11   0  -2   -0.10    0.32
  10   0   5    0.06    0.35
 -10   0  -5    0.09    0.35
  10   0   5    0.23    0.41
 -10   0  -5   -0.06    0.28
  -8   3   3   68.59    4.19
   8   3  -3   73.91    3.57
   8  -3  -3   69.72    2.89
   8  -3  -3   66.30    2.80
   8   3  -3   67.57    2.75
  -8  -3   3   71.31    3.58
   8  -3  -3   62.37    3.50
  -8  -3   3   66.23    4.38
  11   0   2    0.19    0.30
  11   0   2   -0.06    0.36
 -11   0  -2   -0.28    0.46
  -8   3  -3    3.91    0.56
   8  -3   3    5.68    1.65
   8   3   3    4.35    0.54
  -8  -3  -3    4.12    0.81
   8   3   3    3.88    0.83
   8  -3   3    4.47    0.76
  -8  -3  -3    4.03    0.91
   8  -3   3    3.89    0.72
   8  -3   3    4.59    0.82
   8   3   3    5.73    1.61
   0   1 -11   61.70    3.06
   0  -1  11   60.82    3.15
   0   1  11   60.73    3.09
   0   1 -11   59.49    4.02
   0  -1  11   62.33    3.36
   0   1  11   59.37    3.18
   0   1  11   55.70    4.18
   0   1 -11   62.40    2.61
   0   1 -11   46.86    2.20
   0  -1 -11   60.54    2.43
   5   3  -7   11.98    1.44
   5  -3  -7   10.84    0.86
  -5  -3   7   16.58    2.40
  -5   3   7    9.97    0.62
   5  -3  -7   11.64    0.96
   5   3  -7    9.87    0.88
  -5  -3   7   17.35    2.06
  -5   3   7   17.52    1.81
   5   3  -7   12.08    0.95
   5  -3  -7   17.44    1.44
   7  -3  -5   15.05    1.47
  -7  -3   5   15.00    2.01
   7  -3  -5   16.23    1.07
  -7  -3   5   15.87    2.42
  -7   3   5   16.74    2.10
   7   3  -5   16.50    1.57
  -7   3   5   14.80    0.73
   5   3   7    0.59    1.42
  -5   3  -7    1.42    0.59
  -5   3  -7    0.93    3.26
   5   3   7    1.05    0.69
   5  -3   7    1.21    0.59
  -5  -3  -7    2.13    1.59
  -5   3  -7    1.15    0.77
  -5   3  -7    1.41    1.01
   5   3   7    2.21    0.98
   5  -3   7    1.19    0.92
   5   3   7    1.20    0.49
   7   3   5  177.62    6.29
  -7   3  -5  174.66    6.10
   7  -3   5  175.05    6.74
   7  -3   5  188.02    6.65
  -7   3  -5  172.55    5.85
   7   3   5  184.40    6.33
  -7  -3  -5  183.73    6.68
   7   3   5  176.79    6.88
   7   3   5  171.65    7.48
   7  -3   5  183.79    6.53
   2   2 -10   80.80    3.30
   2   2 -10   88.87    4.76
   2   2 -10   84.30    3.96
   2  -2 -10   78.08    3.26
   2  -2 -10   81.86    3.11
  -2   2  10   97.48    5.42
   2  -2 -10   84.43    3.86
  -2   2  10   88.59    4.18
  -2   2  10   82.79    3.30
   2   2 -10   87.28    3.51
  -2  -2  10   88.09    4.09
   2   2  10    1.92    0.65
   2  -2  10    2.09    0.55
  -2  -2 -10    1.81    1.03
  -2   2 -10    2.07    2.13
   2   2  10    2.48    1.40
  -2   2 -10    1.67    0.92
  -2  -2 -10    1.95    0.58
  -2  -2 -10    1.37    1.40
  -3  -4   5   57.00    4.88
   3  -4  -5   52.39    2.41
  -3  -4   5   54.81    3.68
   3   4  -5   52.91    2.95
   3  -4  -5   56.64    2.63
  -3   4   5   55.46    2.32
  -3   4   5   54.34    2.21
   3   4  -5   55.31    2.69
  -3   4   5   55.71    3.27
   3   4  -5   57.55    3.17
   1   1 -11    8.42    0.81
  -1  -1  11    7.07    1.39
  -1   1  11    8.85    2.26
   1   1 -11    8.63    0.69
  -1  -1  11    8.96    1.23
   1  -1 -11    8.41    0.62
  -1   1  11    7.85    1.27
   1   1 -11    8.35    1.08
  -1   1  11    8.54    1.13
   1   1 -11    7.81    1.85
  -3   4  -5    6.46    1.02
   3  -4   5    2.62    0.72
   3   4   5    2.69    0.83
   3   4   5    3.38    0.64
   3   4   5    4.37    0.75
   3   4   5    3.36    0.53
   3   4   5    4.86    1.38
   3   4   5    5.67    0.97
  -3   4  -5    4.60    2.73
   3  -4   5    5.44    1.21
   1  -1  11   78.92    3.89
  -1  -1 -11   82.51    3.07
   1   1  11   87.53    6.02
  -1   1 -11   77.78    3.21
   1   1  11   78.05    3.79
   1  -1  11   77.44    3.75
  -1   1 -11   79.29    3.74
  -1  -1 -11   69.99    4.13
   1   1  11   77.84    3.67
   5   4  -3   78.63    3.35
  -5  -4   3   74.57    4.68
  -5  -4   3   67.72    4.54
   5  -4  -3   72.58    3.08
   5   4  -3   76.40    3.73
   5   4  -3   74.03    3.86
   5  -4   3   12.69    1.39
   5   4   3   11.87    0.89
   5  -4   3   11.51    1.04
   5  -4   3   11.48    1.02
   5   4   3   12.09    0.97
   5   4   3   11.49    0.89
   5   4   3   10.73    1.30
   5   4   3   11.75    1.91
  11  -1   0   34.91    1.54
  11  -1   0   36.98    3.08
  11  -1   0   35.16    1.67
 -11  -1   0   39.21    3.38
  11   1   0   36.70    1.57
 -11   1   0   33.77    1.55
  11   1   0   33.73    1.53
 -11  -1   0   34.08    2.12
 -11   1   0   36.25    3.10
 -10  -2   2    3.20    2.08
  10  -2  -2    3.14    1.45
  10   2  -2    3.00    0.46
 -10   2   2    2.74    1.55
  10  -2  -2    2.83    0.57
 -10  -2   2    3.19    1.00
  10   2  -2    2.87    0.60
  -8   0   8   85.91    4.62
   8   0  -8   86.95    3.15
  -8   0   8   84.44    3.18
   8   0  -8   88.00    3.27
  10   2   2  287.72    9.35
 -10   2  -2  273.03    8.90
  10   2   2  255.24    9.47
  10  -2   2  280.62   11.25
 -10  -2  -2  282.90   10.21
  10  -2   2  285.98    9.46
  10  -2   2  283.56    9.54
  -8   0  -8    3.43    0.89
   8   0   8    2.55    0.41
  -8   0  -8    2.62    0.39
  -8   0  -8    3.27    0.44
  11   1  -1   39.45    1.66
  11  -1  -1   38.63    1.67
  11  -1  -1   40.27    3.14
 -11  -1   1   41.53    3.40
 -11   1   1   42.56    3.36
  11  -1  -1   38.14    1.77
 -11   1   1   36.66    1.66
  11   1  -1   37.39    1.66
 -11  -1   1   34.85    2.15
  11   1   1    2.75    0.41
  11  -1   1    3.21    0.46
 -11   1  -1    3.01    0.48
  11   1   1    2.78    0.45
  11  -1   1    2.62    0.59
  11  -1   1    2.35    1.63
 -11  -1  -1    2.97    0.91
 -11   1  -1    2.37    1.62
 -11  -1  -1    1.79    1.78
  -5   2   9   46.31    1.83
   5  -2  -9   51.82    2.17
   5  -2  -9   51.11    2.31
   5   2  -9   54.18    2.42
   5  -2  -9   50.95    2.83
  -5   2   9   48.79    3.03
  -5   2   9   50.04    2.14
   5   2  -9   50.11    2.18
   0   4  -6   70.74    4.75
   0  -4  -6   69.50    2.98
   0   4   6   64.47    2.54
   0  -4  -6   67.17    2.91
   0   4   6   70.47    3.44
   0  -4   6   71.20    2.99
   0   4   6   64.22    3.78
   0  -4   6   70.58    4.00
   0   4   6   68.17    2.83
   0   4  -6   69.75    3.45
  -5   2  -9  114.03    4.76
   5  -2   9  112.68    4.34
   5   2   9  112.39    4.75
  -5  -2  -9  105.77    6.05
   5   2   9  107.91    3.98
  -5   2  -9  118.24    5.16
   5  -2   9  109.78    4.77
  -5   2  -9  112.07    4.26
  -5   2  -9  114.78    4.07
  -5   2  -9  115.94    7.20
  -3   0  11    1.06    0.86
  -3   0  11    2.09    1.16
   3   0 -11    0.71    0.28
   3   0 -11    0.37    0.41
   9   2  -5    2.74    0.48
   9   2  -5    3.96    0.78
   9  -2  -5    3.06    0.58
  -9   2   5    7.21    1.83
   9  -2  -5    2.50    0.50
   9  -2  -5    8.34    1.47
  -9  -2   5    5.42    1.92
  -3   0 -11   31.47    1.72
   3   0  11   29.48    1.83
  -3   0 -11   31.47    3.43
   3   0  11   28.72    1.94
   7   0  -9    0.23    0.31
  -7   0   9    0.84    0.44
  -9   2  -5   16.98    0.90
   9   2   5   15.74    0.79
   9  -2   5   17.25    1.09
   9  -2   5   19.17    2.16
   9  -2   5   18.39    1.20
  -9   2  -5   18.26    0.81
   9   2   5   18.78    0.85
   9  -2   5   18.41    1.46
  -9  -2  -5   19.19    1.18
  -9   0   7  207.86    8.61
   9   0  -7  203.30    7.38
  -9   0   7  187.03    6.31
   9   0  -7  201.48    6.68
  -1   4   6  103.44    3.73
   1   4  -6  100.91    4.12
   1   4  -6  107.33    4.81
   1  -4  -6  103.87    4.06
  -1   4   6  106.49    3.98
   1   4  -6  106.01    5.56
   1  -4  -6   99.60    4.06
   1   4  -6  108.15    4.70
  -1  -4   6  100.80    4.99
  -1   4   6  104.41    4.61
  -7   0  -9  309.34   10.05
   7   0   9  302.57    9.98
  -7   0  -9  310.37   11.06
   7   0   9  303.15   10.66
  -7   0  -9  381.96   12.57
  -7   0  -9  279.24    9.24
   1   4   6   72.84    2.97
  -1   4  -6   77.69    3.65
   1  -4   6   76.09    4.05
   1   4   6   69.11    2.69
   1   4   6   71.58    4.07
  -1   4  -6   74.52    4.92
  -1  -4  -6   75.91    3.19
   1  -4   6   74.15    3.08
   1   4   6   72.68    3.45
  -1  -4  -6   70.44    3.01
   2  -1 -11    1.02    0.41
  -2   1  11    0.43    0.81
  -2  -1  11    0.91    0.81
   2   1 -11    0.98    0.45
   2   1 -11    1.04    0.36
  -2   1  11   -0.58    1.56
   2   1 -11    1.17    0.75
  -5   1  10   28.87    1.06
  -5  -1  10   32.55    2.62
  -5   1  10   27.47    1.50
  -5   1  10   28.54    2.21
   5  -1 -10   30.35    2.19
  -5  -1  10   31.59    1.81
   5   1 -10   28.80    1.49
   5   1 -10   30.45    1.46
   5  -1 -10   28.63    1.07
   5  -1 -10   29.83    1.08
  -2  -1 -11  228.36    7.56
   2   1  11  221.14    8.29
  -2   1 -11  226.58    8.43
   2  -1  11  220.38    8.17
  -2  -1 -11  213.28    9.03
  -2   1 -11  217.89    7.70
   2   1  11  207.90    7.76
   9   0   7   24.37    1.13
  -9   0  -7   26.25    1.03
  -6  -4   1   76.36    4.77
   6   4  -1   78.88    4.22
  -6  -4   1   77.05    4.77
   6   4  -1   76.23    3.19
  -6  -4   1   80.19    3.80
   6   4  -1   77.19    3.74
   6  -4  -1   78.61    3.25
   6  -4   1   87.53    4.75
   6   4   1   87.29    3.54
   6   4   1   87.90    4.71
   6  -4   1   76.69    3.77
   6   4   1   85.61    3.99
   6  -4   1   88.81    3.59
   6   4   1   93.38    3.69
  -6  -4  -1   92.99    5.15
   6  -4   1   85.87    3.48
 -11   0   3    2.28    1.80
  11   0  -3    2.32    0.41
  -5   1 -10    1.53    0.84
   5   1  10    2.40    0.92
   5  -1  10    0.92    0.50
  -5   1 -10    1.25    0.52
  -5   1 -10    0.98    0.31
  -5  -1 -10    0.68    1.89
  11   0   3   39.48    1.63
  11   0   3   39.67    1.84
 -11   0  -3   36.04    1.77
 -10   1   5   23.73    2.44
 -10  -1   5   23.23    2.46
  10  -1  -5   22.40    2.06
  10  -1  -5   24.91    0.95
  10   1  -5   22.77    0.91
  10  -1  -5   23.98    1.00
  10   1  -5   25.86    1.11
  11   1  -2  248.75    8.19
 -11   1   2  241.04    9.93
  11  -1  -2  240.39    7.99
  11  -1  -2  244.88    8.01
  11  -1  -2  232.65    9.36
  11   1  -2  243.97    7.96
 -11  -1   2  242.18    9.99
 -11  -1   2  231.65    8.46
 -10   1  -5   16.02    0.75
  10   1   5   17.72    0.76
 -10   1  -5   17.22    0.80
  10  -1   5   17.13    0.88
 -10  -1  -5   17.25    0.94
  10  -1   5   17.59    1.51
  10   1   5   17.82    0.96
  10  -1   5   17.02    1.05
  11  -1   2    0.92    0.47
  11   1   2    0.73    0.34
 -11   1  -2    0.67    0.37
 -11  -1  -2    0.46    0.64
  11  -1   2    0.93    0.46
  11   1   2    0.82    0.38
   3  -2 -10   86.94    3.97
   3   2 -10   90.42    4.17
  -3   2  10   83.32    4.13
   3   2 -10   85.59    3.38
   3   2 -10   83.37    3.37
  -3   2  10   92.09    3.57
  -3   2  10   90.02    4.90
   3  -2 -10   89.23    3.34
  -3  -2 -10   33.41    1.76
   3   2  10   39.10    2.41
  -3  -2 -10   36.45    3.05
  -3   2 -10   31.63    2.17
  -3   2 -10   35.46    1.86
  -3   2 -10   37.83    3.80
   3  -2  10   33.06    1.73
   3  -2  10   35.49    2.43
  -3   2 -10   34.25    1.70
   4   3  -8    6.62    1.24
   4   3  -8    8.14    0.89
   4  -3  -8    8.12    0.89
   4   3  -8    6.20    0.74
   4  -3  -8    8.11    1.13
  -4  -3   8    8.30    1.66
  -4   3   8    7.77    0.59
  -4   3   8    8.77    1.40
  -4  -3   8    7.31    2.10
   4  -3  -8    8.22    0.78
  -4   3   8    6.73    0.50
  -4   3  -8   13.39    2.93
  -4   3  -8   12.71    1.37
  -4   3  -8   11.08    0.91
   4   3   8   12.82    1.00
   4   3   8   12.10    1.33
  -4   3  -8   12.21    0.87
   4   3   8   12.22    0.87
   4  -3   8   12.64    1.43
   4   3   8   12.35    1.22
  -4   3  -8   12.19    1.52
   4  -3   8   13.91    1.08
  -8  -3   4   15.22    2.42
  -8   3   4   15.75    2.18
   8   3  -4   15.61    1.50
   8  -3  -4   15.90    1.12
   8  -3  -4   15.69    1.63
   8  -3  -4   15.90    1.15
 -10   2   3  116.29    5.82
  10  -2  -3  114.49    5.29
  10   2  -3  118.47    4.05
  10  -2  -3  120.02    4.22
 -10  -2   3  120.13    6.13
  10   2  -3  103.09    3.92
 -10  -2   3  109.88    4.60
   8  -3   4   29.18    1.64
   8  -3   4   26.36    1.83
  -8   3  -4   26.80    1.39
   8   3   4   26.36    1.32
  -8  -3  -4   28.26    1.71
   8  -3   4   28.70    1.63
   8   3   4   28.79    1.81
   8  -3   4   27.96    2.60
  10   2   3   26.77    1.25
 -10  -2  -3   26.75    1.96
  10  -2   3   27.76    2.70
  10   2   3   25.59    1.28
 -10  -2  -3   25.74    1.51
 -10   2  -3   26.37    1.27
  10  -2   3   27.16    1.54
  10  -2   3   29.52    2.02
  10  -2   3   27.42    1.44
   0   3  -9    2.30    0.68
   0   3  -9    3.42    1.05
   0  -3  -9    2.27    0.54
   0   3   9    1.78    0.95
   0   3   9    1.56    1.58
   0  -3  -9    2.60    0.57
   0   3  -9    1.75    0.51
   0  -3  -9    2.28    0.82
   0   3  -9    2.40    1.84
   0   3   9    2.24    0.38
   0   3  -9    2.05    1.07
   0  -3   9    1.90    1.08
   2   4  -6   59.15    3.14
   2   4  -6   52.22    2.86
  -2   4   6   54.65    2.13
   2  -4  -6   55.40    2.47
   2   4  -6   54.03    3.47
  -2   4   6   51.50    2.88
  -2  -4   6   51.85    3.44
   2  -4  -6   60.68    2.74
  -2   4   6   58.44    2.36
   2   4  -6   50.82    2.47
   2   4   6   56.43    2.41
   2   4   6   58.27    3.56
   2  -4   6   58.01    2.52
   2   4   6   53.20    2.16
   2  -4   6   58.78    3.32
   2   4   6   57.49    2.66
   2   4   6   56.66    2.85
  -2   4  -6   54.61    4.32
  -2  -4  -6   56.06    2.52
  -2   4  -6   57.48    2.88
   6   4  -2   33.00    1.79
   6   4  -2   34.36    2.58
   6  -4  -2   31.97    1.75
  -6  -4   2   33.08    3.07
   6   4  -2   33.96    2.33
  -6  -4   2   37.50    3.26
  -6  -4   2   34.02    2.25
   6  -4  -2   34.18    1.82
   6   4   2    3.38    0.58
   6  -4   2    2.93    0.74
   6   4   2    3.32    1.70
   6  -4   2    4.61    0.93
  -6  -4  -2    3.54    1.69
  -6  -4  -2    3.16    1.68
   6   4   2    2.95    0.65
   6   4   2    2.39    0.87
   6  -4   2    3.69    0.76
   8   1  -8  143.08    4.95
   8  -1  -8  136.70    5.67
  -8  -1   8  142.50    6.37
   8  -1  -8  145.06    4.77
  -8   1   8  139.38    6.20
   8   1  -8  145.44    5.06
  -8   1   8  132.18    4.38
  -8  -1   8  141.79    4.94
   9   3   0    0.28    0.76
  -9  -3   0    0.03    1.57
   9  -3   0   -0.32    1.15
   9  -3   0    0.71    0.62
   9   3   0    0.21    0.39
   9  -3   0    0.44    0.58
  -9  -3   0    0.36    0.86
  -1   3   9    4.59    1.04
   1   3  -9    5.04    1.07
  -1   3   9    5.39    1.74
   1   3  -9    3.58    1.76
  -1   3   9    4.67    0.51
   1   3  -9    3.97    0.77
  -1   3   9    3.98    0.43
   1  -3  -9    4.21    0.62
   1   3  -9    4.55    1.13
  -1  -3   9    4.85    1.35
   1   3  -9    4.27    0.73
   1  -3  -9    4.34    0.69
   1  -3  -9    5.60    0.99
   1   3   9    2.49    0.41
  -1   3  -9    2.25    1.08
   1   3   9    3.39    2.15
   1  -3   9    2.33    0.57
  -1   3  -9    2.01    0.57
  -1  -3  -9    2.64    0.61
   1   3   9    2.24    0.62
   1  -3   9    1.94    1.03
   1   3   9    1.78    0.86
  -1   3  -9    1.76    2.09
  -1  -3  -9    2.16    0.82
  -1   3  -9    2.45    0.93
   8   1   8    8.10    0.55
   8  -1   8    6.90    0.68
   8   1   8   12.11    1.31
   8  -1   8   12.25    1.31
  -8   1  -8    7.93    1.16
  -8   1  -8    7.53    0.69
  -8  -1  -8    9.18    0.79
  -8   1  -8    8.11    0.55
  -4  -4   5   24.64    2.82
  -4   4   5   25.88    1.31
   4  -4  -5   26.07    1.57
   4  -4  -5   27.92    1.60
   4   4  -5   27.31    2.11
   4   4  -5   26.77    2.04
  -4  -4   5   26.71    2.65
  -5  -4   4   10.78    1.96
   5  -4  -4   11.73    0.98
   5   4  -4   12.23    1.47
  -5  -4   4    9.91    2.12
   5  -4  -4   10.85    0.96
   5   4  -4   12.26    1.51
   4  -4   5    9.86    1.35
   4   4   5    8.15    1.60
  -4   4  -5    9.81    1.31
   4   4   5    9.86    1.25
  -4   4  -5   11.69    3.61
   4   4   5    9.72    0.78
   4   4   5   10.75    1.01
   4  -4   5   10.67    1.06
   4   4   5   10.18    1.15
   4   4   5   10.53    0.92
  -4   4  -5   10.13    1.14
   5  -4   4   23.87    1.50
   5   4   4   24.58    1.42
   5   4   4   24.48    1.85
   5   4   4   25.20    1.51
   5   4   4   23.71    2.37
   5  -4   4   23.32    1.91
   5  -4   4   22.47    1.44
   5   4   4   24.06    1.39
  -9  -3   1   -0.31    1.54
   9   3  -1   -0.10    0.67
   9   3  -1    0.10    0.45
  -9  -3   1   -0.15    0.78
   9  -3  -1   -0.08    0.54
   9  -3  -1   -0.04    1.08
   9  -3  -1   -0.00    0.56
  -9  -3  -1   11.81    2.15
   9  -3   1   11.57    0.96
   9  -3   1   10.72    1.84
   9  -3   1   10.94    1.16
   9   3   1   11.45    0.78
   9  -3   1   12.14    0.94
   9   3   1   11.17    1.14
  -9  -3  -1   11.10    1.31
  -3   1  11    2.34    1.14
   3   1 -11    3.05    0.78
  -3  -1  11    3.13    1.37
   3   1 -11    2.54    0.44
   3  -1 -11    2.61    0.44
   3   1 -11    2.25    0.52
  -3  -1  11    2.29    0.92
   3  -1 -11    2.27    0.47
  -3   1  11    2.17    0.81
  -3  -1 -11   59.46    2.28
  -3  -1 -11   59.41    4.09
   3   1  11   57.99    3.06
  -3   1 -11   59.50    3.12
  -7   1   9   13.54    0.71
  -7   1   9   15.53    1.89
  -7  -1   9   14.70    1.02
   7  -1  -9   12.86    0.75
  -7  -1   9   14.03    1.86
   7  -1  -9   14.08    1.51
   7   1  -9   14.48    0.77
   7  -1  -9   14.11    0.76
   6   0 -10    0.27    0.28
  -6   0  10    0.72    1.30
  -6   0  10    0.47    0.46
   6   0 -10    1.12    0.49
   9  -1  -7    5.22    1.22
   9   1  -7    4.79    0.52
  -9   1   7    4.97    0.49
   9   1  -7    4.82    0.66
  -9   1   7    4.41    1.59
   9  -1  -7    4.57    0.59
  -9  -1   7    4.44    1.68
   9  -1  -7    4.88    0.51
  -6   0 -10   59.76    2.83
   6   0  10   59.60    3.05
  -6   0 -10   61.15    2.36
  -6   0 -10   58.08    4.85
   6   0  10   57.11    2.45
  -7  -1  -9    5.37    2.79
  -7  -1  -9    3.52    0.62
   7   1   9    4.03    1.09
   7  -1   9    2.95    1.04
  -7   1  -9    3.18    0.94
  -7   1  -9    3.54    0.42
   7   1   9    3.88    0.42
   7  -1   9    3.28    0.62
  -7   1  -9    2.81    0.54
  -7   2   8    1.22    1.19
   7  -2  -8    1.80    0.46
   7   2  -8    1.66    0.88
  -7  -2   8    1.88    0.61
  -7  -2   8    3.10    1.67
  -7   2   8    1.68    0.34
   7  -2  -8    1.84    0.50
   7   2  -8    1.89    0.49
   7  -2  -8    0.52    0.92
  10   0  -6   98.07    3.46
 -10   0   6   99.11    5.12
  10   0  -6   93.47    3.23
   8  -2  -7   16.73    1.04
  -8   2   7   17.62    0.91
  -8   2   7   19.17    2.18
  -8  -2   7   20.22    2.45
   8   2  -7   16.29    1.01
   8  -2  -7   18.34    1.74
   8   2  -7   18.44    1.44
   9  -1   7   23.82    1.30
   9  -1   7   22.65    1.39
  -9   1  -7   23.07    1.19
   9  -1   7   21.85    1.75
   9   1   7   22.70    1.77
  -9  -1  -7   22.83    1.28
   9   1   7   23.07    1.08
  -9   1  -7   22.53    1.08
  -4   0  11    0.33    0.83
   4   0 -11   -0.20    0.25
  -4   0  11    0.38    1.09
   4   0 -11   -0.13    0.46
 -11  -1   3   32.83    3.02
 -11   1   3   30.99    3.02
  11   1  -3   31.75    1.39
  11  -1  -3   29.52    2.51
  11  -1  -3   29.80    1.44
  11   1  -3   29.93    1.45
   7   2   8   93.03    3.19
   7  -2   8   89.23    3.98
   7  -2   8   88.47    3.45
  -7   2  -8   77.41    3.02
  -7  -2  -8   98.86    3.95
  -7  -2  -8   87.19    6.28
  -7   2  -8   90.98    4.17
   7   2   8   89.65    3.94
  -7   2  -8   97.32    3.36
  11  -1   3    8.03    1.85
 -11   1  -3    9.61    0.66
  11   1   3    9.24    0.66
  11  -1   3    8.77    0.77
  11  -1   3    9.34    0.66
  11   1   3    9.34    0.60
 -11  -1  -3    8.21    1.10
 -10   0  -6    8.69    0.70
  10   0   6    8.67    0.80
 -10   0  -6    9.76    0.67
  10   0   6    8.75    0.62
   8  -2   7    1.38    0.88
  -8   2  -7    1.00    0.36
   8  -2   7    1.71    0.56
   8   2   7    4.10    1.09
  -8   2  -7    1.54    0.49
  -8  -2  -7    2.21    0.61
   8   2   7    2.33    0.37
   4   0  11    0.56    1.01
  -4   0 -11    0.15    0.45
  -4   0 -11    0.63    2.14
   2   3  -9   38.79    2.43
   2   3  -9   40.85    2.12
  -2   3   9   39.72    1.67
  -2   3   9   37.18    1.54
  -2   3   9   40.71    2.55
  -2   3   9   42.97    3.24
   2   3  -9   38.66    3.10
   2  -3  -9   39.21    1.85
   2  -3  -9   34.77    2.15
   2  -3  -9   42.18    2.16
   2   3  -9   41.08    2.03
  -2  -3   9   41.11    2.83
  -2   3  -9   15.97    1.13
   2   3   9   16.03    1.18
   2  -3   9   14.22    1.59
  -2   3  -9   16.84    2.81
  -2   3  -9   17.05    1.55
   2  -3   9   16.98    1.17
  -2   3  -9   16.49    1.64
  -2  -3  -9   17.04    1.19
  -2   3  -9   14.11    1.01
   2   3   9   15.77    1.49
  -6  -3   7   10.15    2.04
   6  -3  -7    9.78    0.88
  -6   3   7   11.19    0.62
   6   3  -7    9.60    0.86
   6  -3  -7    9.59    0.82
   6   3  -7    9.21    1.33
  -6  -3   7   10.30    2.03
  -6   3   7    9.49    1.56
   6  -3  -7   10.31    1.24
  -7   3   6   12.22    1.80
   7   3  -6    7.68    1.30
  -7  -3   6   11.22    1.90
   7  -3  -6    6.55    0.78
  -7   3   6    5.58    0.49
   7   3  -6    7.15    0.74
  -7  -3   6   11.87    2.06
   7  -3  -6   12.83    1.38
 -11   0   4   -0.33    1.49
  11   0  -4    0.33    0.40
  -6   3  -7  148.03    4.96
   6   3   7  154.48    5.19
   6   3   7  151.83    5.26
  -6   3  -7  153.53    6.05
  -6   3  -7  148.28    5.63
   6   3   7  153.27    5.83
   6   3   7  148.54    6.59
  -6   3  -7  148.54    5.18
   6  -3   7  147.87    5.84
   6  -3   7  144.34    5.15
  -7   3  -6    1.66    0.52
   7  -3   6    1.90    0.82
  -7  -3  -6    4.45    2.82
   7   3   6    2.37    0.87
   7  -3   6    1.97    0.73
   7   3   6    2.31    0.44
   7   3   6    3.05    1.00
  11   0   4   -0.18    0.30
  11   0   4    0.20    0.43
 -11   0  -4   -0.13    0.42
   9   3  -2    4.12    0.60
   9  -3  -2    4.61    1.29
  -9  -3   2    4.40    1.99
   9   3  -2    4.68    0.98
   9  -3  -2    5.16    0.73
  -9   3   2    4.36    1.44
  -9  -3   2    4.77    1.10
   9   3   2   51.86    2.56
   9  -3   2   52.22    2.33
   9   3   2   53.27    2.15
   9  -3   2   54.91    3.82
  -9  -3  -2   53.19    2.94
  -9  -3  -2   55.02    3.77
   9  -3   2   54.47    2.36
   9  -3   2   55.25    2.83
   3  -4  -6    2.64    0.68
   3   4  -6    1.88    1.03
  -3  -4   6    3.83    1.43
   3   4  -6    4.13    1.13
   3  -4  -6    2.04    0.63
  -3   4   6    2.25    0.46
   3   4  -6    2.21    0.77
  -3   4   6    4.64    1.11
  -3  -4   6    5.05    2.48
  -3   4  -6    5.19    1.21
   3   4   6    5.62    0.58
   3  -4   6    5.97    1.19
   3   4   6    5.77    0.92
  -3   4  -6    5.90    1.05
   3  -4   6    6.37    0.88
   3   4   6    6.30    0.99
   3   4   6    6.01    0.88
   3   4   6    5.84    0.73
  -3   4  -6    5.57    2.27
   3   4   6    6.56    1.41
  -6  -4   3    0.83    1.67
  -6  -4   3   -0.75    1.64
   6   4  -3    0.58    1.17
   6   4  -3    0.20    0.54
   6  -4  -3    0.59    0.56
   6   4  -3   -0.03    0.91
   6   4   3   79.38    3.68
   6  -4   3   76.62    4.30
   6  -4   3   81.78    3.28
   6   4   3   80.72    3.20
   6   4   3   74.94    4.18
   6   4   3   82.49    3.24
   6  -4   3   82.27    3.33
   6  -4   3   75.72    3.66
  -4   2  10  181.56    6.07
   4   2 -10  169.06    5.70
   4  -2 -10  181.77    6.23
   4  -2 -10  185.39    6.08
  -4   2  10  170.27    7.20
   4   2 -10  180.57    6.15
   4  -2 -10  173.38    6.55
  -4   2  10  184.56    7.17
   4   2 -10  178.43    6.63
   4  -2  10   32.18    1.70
  -4   2 -10   30.96    3.49
  -4  -2 -10   31.87    1.69
  -4   2 -10   31.56    1.68
  -4  -2 -10   31.85    3.08
  -4   2 -10   30.68    1.47
  -4   2 -10   32.49    2.20
   4  -2  10   32.75    2.26
   4   2  10   30.01    2.01
 -10   2   4   19.04    2.55
 -10  -2   4   18.89    2.86
  10  -2  -4   17.08    1.88
  10  -2  -4   17.88    1.08
  10  -2  -4   18.14    1.12
  10   2  -4   18.93    1.29
   6   2  -9    6.87    0.66
   6  -2  -9    7.20    0.72
  -6   2   9    6.31    0.51
   6  -2  -9    7.42    0.72
   6  -2  -9    9.09    1.31
  -6   2   9    7.49    1.53
  -6  -2   9    7.58    0.90
  10   2   4    6.96    0.57
  10  -2   4   10.53    1.86
 -10  -2  -4    7.32    1.13
  10   2   4    4.97    0.50
 -10  -2  -4    8.80    0.85
 -10   2  -4    5.95    0.56
  10  -2   4   12.58    1.27
  10  -2   4    7.87    0.76
  10  -2   4    7.02    0.79
  -6  -2  -9   39.30    3.69
   6   2   9   42.42    1.68
   6  -2   9   42.24    2.03
  -6   2  -9   40.26    1.94
  -6   2  -9   43.49    1.77
  -6   2  -9   51.65    5.15
   6   2   9   40.06    2.39
   6  -2   9   37.19    2.33
  -6   2  -9   43.29    2.66
   9  -2  -6    5.03    1.20
   9  -2  -6    3.04    0.53
   9   2  -6    3.82    0.79
  -9  -2   6    4.16    1.93
   9   2  -6    3.66    0.53
   9  -2  -6    3.66    0.62
  -9   2   6    3.66    1.51
   9  -2   6   23.37    2.31
   9  -2   6   24.16    1.46
   9   2   6   24.41    1.80
  -9  -2  -6   27.04    1.60
   9  -2   6   24.32    1.80
   9   2   6   26.88    1.24
  -9   2  -6   25.93    1.20
  -9   2  -6   24.66    1.28
   9  -2   6   25.38    1.43
   5  -3  -8  122.51    5.00
   5   3  -8  114.46    4.19
  -5   3   8  118.56    5.24
   5  -3  -8  121.19    4.47
   5  -3  -8  113.03    4.06
   5   3  -8  125.73    5.17
  -5  -3   8  113.50    5.41
  -5   3   8   97.10    3.28
   6  -1 -10    9.54    0.67
   6   1 -10    9.32    0.64
  -6   1  10    9.05    0.64
  -6  -1  10    9.49    0.91
   6  -1 -10    9.58    0.67
   6   1 -10    9.15    0.90
  -6   1  10    9.91    1.64
  -6  -1  10    9.68    1.79
  -5  -3  -8   27.44    2.82
   5   3   8   26.09    1.92
   5  -3   8   23.88    1.90
   5   3   8   24.75    2.51
  -5   3  -8   24.71    2.04
  -5   3  -8   24.45    1.45
   5  -3   8   26.76    1.62
  -5   3  -8   25.03    1.80
  -5   3  -8   22.88    1.45
   5   3   8   25.02    1.34
  -5   3  -8   28.51    4.14
   8  -3  -5   89.40    3.44
   8  -3  -5   83.27    3.98
  -8  -3   5   88.73    4.99
  -8   3   5   90.94    4.93
  -8  -3   5   82.26    4.31
   8   3  -5   85.99    3.87
   8  -3  -5   83.92    3.19
  -6   1 -10   12.69    0.91
   6  -1  10   12.90    0.94
  -6  -1 -10   12.85    2.53
   6   1  10   12.91    1.39
  -6   1 -10   14.29    1.37
  -6   1 -10   14.45    0.70
   6  -1  10   12.72    1.44
   8  -3   5  173.42    7.35
   8  -3   5  198.18    6.72
   8   3   5  188.50    6.17
  -8  -3  -5  194.05    6.78
   8  -3   5  182.67    6.77
  -8   3  -5  178.96    5.97
   8   3   5  176.31    6.31
   8  -3   5  189.82    6.46
 -10   1   6    1.09    1.57
  10  -1  -6    1.73    1.12
  10   1  -6    0.67    0.37
 -10  -1   6    1.23    1.62
  10  -1  -6    0.69    0.41
  10   1  -6    0.51    0.47
  10  -1  -6    0.73    0.41
  -3   3   9   13.07    1.81
  -3   3   9    2.88    0.45
  -3   3   9   15.90    1.70
   3   3  -9    5.20    0.72
   3  -3  -9    6.13    0.79
  -3   3   9    3.90    0.43
   3   3  -9    7.83    0.91
   3  -3  -9    6.57    0.72
  -3  -3   9   16.09    1.93
   3  -3  -9   13.98    1.33
   0  -4   7   12.55    0.99
   0  -4   7   15.60    1.91
   0   4   7   10.93    0.68
   0   4  -7   15.01    2.37
   0  -4  -7   11.73    1.04
   0   4   7   15.15    1.43
   0   4   7   12.77    0.88
   0   4  -7   14.99    1.40
   0  -4  -7   13.03    1.00
   4   1 -11   99.96    3.76
   4   1 -11   97.94    3.46
  -4  -1  11   97.41    4.63
  -4   1  11   80.34    3.46
   4  -1 -11   94.40    3.41
  -4   1  11   99.95    4.61
   4  -1 -11   97.51    3.41
   4   1 -11  102.70    4.00
   3   3   9   14.93    0.97
  -3   3  -9   15.04    1.08
  -3  -3  -9   15.11    1.18
  -3   3  -9   13.30    2.61
  -3   3  -9   13.61    1.48
   3   3   9   15.04    1.57
   3  -3   9   13.41    1.89
  -3   3  -9   15.27    1.41
   3  -3   9   14.55    1.01
  -3   3  -9   14.87    1.34
 -10  -1  -6    3.46    0.86
  10  -1   6    4.06    1.01
  10  -1   6    4.24    0.58
  10   1   6    4.51    0.98
 -10  -1  -6    3.65    0.54
 -10   1  -6    3.11    0.40
 -10   1  -6    3.77    0.46
  10  -1   6    3.97    0.66
  10   1   6    4.61    0.45
  -4   1 -11   65.27    2.78
  -4   1 -11   71.65    3.51
   4  -1  11   54.89    2.41
  -4  -1 -11   69.71    2.64
   4   1  11   69.80    3.41
  -4  -1 -11   71.20    4.80
  -4   1 -11   61.97    2.27
   7  -4   0  106.00    4.02
  -7  -4   0   95.02    4.88
   7  -4   0   94.02    4.20
  -7  -4   0  102.38    5.46
   7  -4   0  108.31    4.07
   7  -4   0   98.17    4.74
   7   4   0   94.62    4.73
   7   4   0  103.66    3.86
   7   4   0  101.94    4.44
  -9  -3   3    0.90    1.93
   9   3  -3    1.48    0.50
   9  -3  -3    1.45    0.56
   9  -3  -3    2.08    1.09
  -9   3   3    2.26    1.43
   9  -3  -3    1.51    0.63
   9   3  -3    1.74    0.80
   9  -3   3  270.12    9.33
   9   3   3  290.39    3.45
  -9  -3  -3  277.91    5.32
   9   3   3  258.68    8.70
   9  -3   3  266.70   10.44
   9  -3   3  269.62    8.92
   9  -3   3  287.82    4.02
  -1  -4   7   16.30    2.05
  -1   4   7   15.54    1.47
  -1   4   7   12.77    0.73
   1  -4  -7   14.22    1.04
   1   4  -7   16.51    1.58
   1  -4  -7   14.25    1.04
   1   4  -7   17.01    2.27
   1   4  -7   14.72    1.19
  -1   4   7   14.52    0.88
   1  -4   7    1.58    1.08
   1   4   7    2.07    1.14
  -1   4  -7    2.26    0.85
  -1  -4  -7    1.66    0.66
   1   4   7    1.27    0.83
  -1   4  -7    0.60    2.25
   1  -4   7    1.59    0.64
   1   4   7    1.51    0.50
  -1  -4  -7    2.05    0.57
   1   4   7    1.67    0.39
  -1   4  -7    1.60    1.08
   5  -4  -5   12.58    1.00
  -5  -4   5   12.27    2.25
   5   4  -5   15.08    1.55
   5  -4  -5   12.56    1.02
   5   4  -5   12.51    1.48
   5  -4  -5   12.17    1.18
  -5  -4   5   13.55    2.13
  11   1  -4   55.61    2.21
  11  -1  -4   56.56    2.23
  11  -1  -4   56.18    3.37
  11  -1  -4   53.18    2.05
 -11  -1   4   59.63    4.04
 -11   1   4   59.33    3.88
   0   0 -12    9.03    0.76
   0   0  12    8.20    1.15
   0   0  12    7.96    1.33
   0   0 -12    7.18    1.70
   5   4   5   14.57    1.06
   5  -4   5   13.67    1.44
   5   4   5   14.22    0.99
   5   4   5   12.78    1.33
   5  -4   5   12.51    1.09
   5   4   5   13.33    1.33
   5   4   5   12.81    0.89
   5   4   5   14.36    1.94
  -7  -4   1    2.65    0.95
  -7  -4   1    3.75    1.91
   7   4  -1    3.16    1.37
  -7  -4   1    2.49    1.23
   7  -4  -1    3.15    0.72
   7  -4  -1    2.49    1.15
   7   4  -1    2.72    0.67
   7   4  -1    3.02    1.15
   7   4   1   59.04    3.61
   7  -4   1   61.78    2.67
   7  -4   1   56.91    2.95
   7  -4   1   62.13    2.69
   7   4   1   62.57    3.18
  -7  -4  -1   58.71    3.91
   7   4   1   61.18    2.60
  11   1   4   42.99    1.71
  11  -1   4   47.33    2.16
  11   1   4   47.36    2.00
 -11   1  -4   47.08    1.88
 -11  -1  -4   46.70    2.60
  11  -1   4   44.05    1.83
  11  -1   4   46.91    2.59
   0  -2  11   50.61    2.78
   0   2 -11   57.97    4.03
   0   2  11   55.85    3.05
   0  -2 -11   52.98    2.20
   0   2  11   51.02    2.48
   0   2  11   47.02    3.80
   0  -2  11   50.19    2.95
   0   2 -11   54.14    2.50
   0   2 -11   48.02    2.19
   0   2 -11   52.82    2.94
   1   0 -12   -0.00    0.37
  -1   0  12   -0.05    0.78
   1   0 -12    0.02    0.50
  -1   0  12   -0.14    1.05
   1   0 -12   -0.20    0.45
  -1   0 -12    0.40    1.67
   1   0  12    0.74    1.02
   1   0  12    0.14    0.82
  -1   0 -12    0.16    0.40
   1  -2 -11   70.12    2.68
   1   2 -11   66.26    2.78
  -1   2  11   68.13    2.91
   1   2 -11   72.55    3.52
   1   2 -11   69.82    2.91
   1   2 -11   72.45    4.25
  -1   2  11   68.95    4.51
  -1  -2  11   71.25    3.74
  -1   2  11   71.73    3.62
   1  -2 -11   75.86    3.56
   1  -2 -11   64.60    2.68
  -8   0   9   -0.07    0.36
  -8   0   9   -0.72    1.50
   8   0  -9   -0.03    0.32
   1  -2  11   29.69    2.03
  -1   2 -11   29.59    2.14
  -1  -2 -11   30.93    1.54
   1   2  11   33.57    3.87
  -1   2 -11   32.33    3.33
  -1   2 -11   26.46    1.65
  -1   2 -11   27.09    1.62
   1   2  11   26.98    2.10
   1  -2  11   29.21    2.27
  12   0   0   13.68    0.84
 -12   0   0   12.65    2.19
 -12   0   0   12.62    0.99
  12   0   0   13.89    0.71
   9   0  -8    0.19    0.33
  -9   0   8    0.30    0.37
  -9   0   8    0.10    1.60
   9   0  -8   -0.06    0.43
  11  -2   0  102.07    3.76
  11  -2   0  100.30    3.57
  11  -2   0   96.64    5.05
 -11  -2   0   98.06    5.30
 -11  -2   0   93.62    4.13
  11   2   0   98.79    3.41
  11   2   0   84.05    3.50
  -4   4   6  280.15    3.26
   4  -4  -6  264.81    8.66
   4  -4  -6  270.50    8.91
   4   4  -6  251.10    8.92
   4   4  -6  265.49    9.35
  -4  -4   6  272.41   10.49
  -4  -4   6  230.43    9.86
   4   4  -6  262.77    8.74
  -8   0  -9   -0.01    0.28
   8   0   9   -0.19    0.36
  -8   0  -9   -0.07    0.64
   4   4   6   28.06    1.69
   4  -4   6   33.23    1.89
   4   4   6   27.38    2.49
  -4   4  -6   26.94    2.03
   4   4   6   27.83    1.99
  -4   4  -6   31.72    4.11
   4  -4   6   27.92    2.17
  -4   4  -6   29.99    1.94
   4   4   6   27.44    1.87
   4   4   6   32.84    1.96
   6  -4  -4   36.83    2.27
   6  -4  -4   38.00    1.94
  -6  -4   4   40.78    3.85
   6   4  -4   38.94    2.44
  -6  -4   4   36.91    3.20
   6   4  -4   36.35    2.60
  -5   0  11  267.09    9.80
   5   0 -11  254.06    8.42
   5   0 -11  274.69    3.47
  -9   0  -8   -0.07    0.27
  -9   0  -8    0.08    0.27
  -9   0  -8   -0.12    0.67
   9   0   8    0.06    0.30
   6   4   4  217.13    7.18
   6  -4   4  227.38    7.59
   6  -4   4  216.71    7.96
   6   4   4  219.87    7.95
   6   4   4  218.64    7.26
   6   4   4  210.67    8.48
   6   4   4  224.22    7.45
   6  -4   4  202.32    6.83
   5   0  11  143.54    5.63
  -5   0 -11  142.63    7.32
  -5   0 -11  150.18    5.36
  -5   0 -11  147.10    5.03
   0   5   0   -0.57    0.87
 -12   0   1    0.05    0.57
 -12   0   1   -0.28    1.58
  12   0  -1   -0.00    0.34
  12   0  -1    0.09    0.36
 -12   0  -1   -0.86    1.65
  12   0   1    0.05    0.44
  12   0   1   -0.20    0.38
 -12   0  -1   -0.03    0.46
 -11   2   1   17.77    2.25
 -11  -2   1   16.03    1.59
  11   2  -1   16.52    1.06
 -11  -2   1   16.51    2.51
  11  -2  -1   16.16    1.09
  11   2  -1   17.91    1.01
  11  -2  -1   17.23    1.06
  11  -2  -1   16.54    2.21
   2   4  -7   19.39    2.17
  -2   4   7   18.85    1.08
   2   4  -7   19.92    1.78
   2   4  -7   19.50    1.47
   2   4  -7   17.56    1.78
  -2   4   7   18.12    0.99
   2  -4  -7   20.10    1.39
  -2   4   7   20.75    1.79
  -2  -4   7   19.24    2.13
   2  -4  -7   17.95    1.24
  11  -2   1  213.77    6.92
  11   2   1  218.86    7.01
  11  -2   1  214.85    8.88
  11  -2   1  218.70    7.24
  11   2   1  207.72    7.07
 -11  -2  -1  214.16    7.81
 -11  -2  -1  211.17    8.72
  -2  -4  -7   26.91    1.58
  -2   4  -7   27.83    3.26
   2  -4   7   28.36    1.61
   2   4   7   29.62    2.48
  -2   4  -7   29.18    2.19
   2   4   7   27.63    1.68
   2  -4   7   29.08    2.32
   2   4   7   27.83    1.53
  -2   4  -7   30.46    2.03
   2   4   7   28.23    1.94
   2   4   7   26.03    1.28
  11   0  -5  165.51    5.54
 -11   0   5  179.63    7.71
  11   0  -5  188.55    6.08
   7  -4  -2   45.41    2.15
  -7  -4   2   43.07    3.54
  -7  -4   2   43.56    3.28
   7   4  -2   44.71    2.66
   7  -4  -2   44.01    2.46
   7   4  -2   45.10    2.11
   7  -4  -2   44.70    2.73
   7  -4  -2   37.56    1.93
   7   4  -2   44.05    2.94
   0   5   1   52.94    2.80
   0   5  -1   48.86    2.73
   0  -5   1   46.10    3.31
   0   5  -1   48.16    3.65
   0  -5  -1   44.83    2.06
   0  -5   1   47.16    2.14
  -1  -5   0   10.85    1.74
   1   5   0    8.99    1.33
  -1   5   0    8.48    1.91
  11   0   5   52.12    2.74
  11   0   5   50.21    1.96
 -11   0  -5   52.24    2.07
 -11   0  -5   48.17    2.14
  11   0   5   51.53    2.30
  -2   0  12   23.60    2.71
  -2   0  12   23.18    1.73
   2   0 -12   24.58    1.30
   2   0 -12   23.42    1.08
  -2   0 -12  653.56    5.92
  -2   0 -12  628.15   19.80
   2   0  12  631.34   18.45
   2  -2 -11   76.75    3.02
   2   2 -11   78.38    3.55
   2  -2 -11   74.06    2.62
  -2   2  11   74.64    2.91
  -2   2  11   78.61    4.69
   2  -2 -11   72.64    3.30
   2   2 -11   72.29    2.86
   2   2 -11   74.85    2.83
   2   2 -11   76.44    4.21
  -2   2  11   75.65    3.60
   1   5  -1   18.77    1.74
  -1  -5   1   18.83    2.32
   1  -5  -1   16.78    1.15
   1  -5   1    2.47    0.67
  -1  -5  -1    2.24    0.73
   1   5   1    2.42    1.03
  -1   5  -1    1.95    1.54
   1  -5   1    2.75    1.26
  -1   5  -1    2.49    1.04
   5   2 -10   39.74    1.72
   5   2 -10   37.41    1.77
   5  -2 -10   37.48    1.62
   5   2 -10   34.43    2.08
   5  -2 -10   37.75    2.29
  -5   2  10   38.82    2.68
   5  -2 -10   37.40    1.79
  -2   2 -11    2.44    1.07
   2  -2  11    5.98    1.27
  -2   2 -11    1.31    0.61
   2   2  11    5.61    1.27
  -2   2 -11    2.59    0.68
  -2  -2 -11    1.85    0.52
  -2   2 -11    4.95    2.46
  -2  -2 -11    4.26    1.52
  -5  -2 -10   48.84    3.82
   5   2  10   47.60    2.57
   5  -2  10   52.18    2.35
   5  -2  10   45.22    2.58
  -5   2 -10   42.89    1.70
  -5   2 -10   46.21    4.13
  -5   2 -10   45.61    2.05
  -5   2 -10   45.42    2.61
   7   0 -10    0.11    0.30
  -7   0  10    0.57    1.33
  -7   0  10    0.10    0.38
   7   0 -10    0.26    0.43
  10  -2  -5   66.18    2.44
  10  -2  -5   65.18    2.37
  10   2  -5   69.65    2.76
 -10   2   5   65.69    4.02
  10  -2  -5   65.86    3.47
 -10  -2   5   68.90    4.29
 -12   0   2  481.51   15.60
  12   0  -2  468.43   13.43
  12   0  -2  509.06   13.89
  12   0   2    6.36    0.63
  12   0   2    6.30    1.08
 -12   0  -2    6.11    0.92
  11  -2  -2   95.88    3.29
 -11  -2   2   95.00    5.16
  11  -2  -2   95.13    4.68
  11   2  -2   92.40    3.19
 -11  -2   2   87.63    3.76
  11   2  -2   97.99    3.19
 -11   2   2  100.33    5.04
  11  -2  -2   86.59    2.97
  10  -2   5   32.08    1.56
 -10  -2  -5   31.69    1.65
  10  -2   5   32.22    1.64
  10  -2   5   32.32    2.05
 -10   2  -5   32.03    1.41
  10  -2   5   32.51    2.80
  10   2   5   32.82    1.36
  -4   3   9   14.44    0.67
   4   3  -9   15.01    1.06
   4  -3  -9   15.43    0.95
  -4  -3   9   15.59    1.99
  -4   3   9   16.49    1.68
   4  -3  -9   14.76    1.38
  -4   3   9   15.64    1.92
   4   3  -9   15.01    1.01
   4  -3  -9   15.28    1.03
   7   0  10    0.14    0.43
  -7   0 -10    0.06    0.32
  -7   0 -10    0.05    0.52
  -7   0 -10    0.88    2.62
  -7   0 -10    0.04    0.27
   7   0  10   -0.32    0.96
  10   0  -7   -0.11    0.37
 -10   0   7    0.45    1.64
  10   0  -7   -0.11    0.33
 -11  -2  -2   91.80    4.89
 -11   2  -2   93.64    3.02
  11   2   2  101.28    3.22
  11  -2   2   99.58    3.33
 -11  -2  -2   95.37    4.04
  11   2   2   93.12    3.49
  11  -2   2  101.37    5.23
  11  -2   2  100.26    3.53
   0   1 -12    1.96    0.86
   0   1 -12    2.00    0.42
   0  -1  12    3.49    1.28
   0   1  12    2.83    1.13
   0  -1  12    0.97    0.84
   0   1  12    1.63    0.75
   0  -1 -12    1.85    0.41
  -4   3  -9   -2.26    1.70
  -4   3  -9    0.14    0.48
   4   3   9    1.12    0.90
   4  -3   9    0.72    0.92
  -4   3  -9    1.38    0.95
   4  -3   9    0.26    0.55
  -4   3  -9    0.36    0.91
   4   3   9    0.34    0.33
  -4   3  -9    0.04    0.43
  -4  -3  -9    1.08    1.11
 -10   0  -7    0.17    0.32
  10   0   7    0.17    0.31
   9  -3  -4   15.39    1.02
   9   3  -4   16.08    1.34
   9  -3  -4   15.32    1.01
   9  -3  -4   16.16    1.65
  -9  -3   4   16.37    2.47
  -9   3   4   15.22    2.14
   0  -5   2   24.94    1.47
   0  -5   2   28.54    2.71
   0  -5  -2   24.62    1.57
   0   5  -2   24.17    2.00
   0   5  -2   28.05    2.82
  -2  -5   0  131.01    6.03
   2   5   0  122.38    4.88
   2   5   0  124.84    4.43
  -2   5   0  151.82    8.55
   9   3   4    5.86    0.78
   9  -3   4    5.37    0.93
   9  -3   4    5.78    0.77
   9   3   4    5.99    0.59
   9  -3   4    6.09    0.81
   9  -3   4    5.87    1.54
  -1  -1  12   52.30    3.17
  -1  -1  12   47.15    2.59
  -1   1  12   45.53    2.44
   1   1 -12   46.76    3.27
   1   1 -12   51.82    2.00
   1   1 -12   44.69    1.99
   1  -1 -12   50.15    1.90
   1   1 -12   48.71    2.40
  -1   1  12   53.24    3.07
   1  -1  12  308.47    9.94
  -1   1 -12  309.19    9.64
   1   1  12  300.17    9.63
  -1   1 -12  305.19    8.96
   1  -1  12  301.45    9.61
  -1  -1 -12  286.96   10.07
  -1  -1 -12  310.87    8.98
   7  -3  -7    8.18    1.20
  -7  -3   7    7.35    1.88
   7  -3  -7    3.59    0.61
   7   3  -7    3.39    1.13
   7   3  -7    3.50    0.61
  -7   3   7    8.66    1.70
   7  -3  -7    3.75    0.68
  -7   3   7    3.28    0.43
   8  -1  -9   44.23    1.71
  -8   1   9   45.04    3.01
   8   1  -9   44.09    1.75
  -8   1   9   45.45    1.72
  -8  -1   9   45.57    3.15
   8   1  -9   43.85    1.93
  -8  -1   9   44.84    2.02
 -12  -1   0    8.08    2.03
 -12  -1   0    6.03    1.03
  12   1   0    6.72    0.59
  12  -1   0    6.02    0.65
  12   1   0    6.54    0.55
  12  -1   0    6.71    0.57
 -12   1   0    6.55    1.75
  -7  -3  -7  130.24    6.74
   7  -3   7  138.04    5.17
   7  -3   7  134.97    4.50
   7   3   7  150.32    4.62
   7   3   7  145.55    5.28
  -7   3  -7  157.40    5.80
   7   3   7  156.47    5.02
  -7   3  -7  132.61    4.33
   9  -1  -8   12.89    0.76
   9  -1  -8   13.03    0.78
   9   1  -8   14.16    0.77
  -9   1   8   12.84    0.71
   9   1  -8   14.44    0.97
  -9   1   8   15.17    2.03
  -9  -1   8   16.62    2.24
   1   5  -2    5.59    1.34
  -1  -5   2    7.03    1.72
   1   5  -2    7.31    1.53
   1  -5  -2    7.10    0.96
   1  -5  -2    6.36    0.87
  -1  -5   2    8.10    0.91
  -1   5  -2   53.00    3.89
   1   5   2   54.96    2.82
   1  -5   2   55.37    3.69
   1  -5   2   55.60    2.37
  -1  -5  -2   54.02    2.33
  -1   5  -2   56.55    2.95
   2   5  -1   96.31    3.67
  -2  -5   1   94.76    5.00
   2   5  -1   93.67    4.10
   2  -5  -1   93.33    3.46
   2  -5  -1   95.97    3.55
  -2   5  -1    9.74    2.70
   2   5   1   10.88    1.37
   2   5   1   11.35    1.14
   2  -5   1   10.04    0.96
   3  -4  -7    2.06    0.68
   3   4  -7    2.67    1.17
  -3   4   7    2.07    0.42
   3   4  -7    1.90    0.75
  -3  -4   7    2.91    1.43
   3   4  -7    1.93    0.99
   3  -4  -7    2.04    0.71
   3  -4  -7    1.97    0.69
  -3  -4   7    0.72    2.13
  -8   1  -9   89.95    4.01
   8   1   9   89.29    2.86
   8  -1   9   90.55    3.24
   8  -1   9   83.86    3.60
  -8  -1  -9   92.27    3.33
   8   1   9   89.71    3.77
  -8   1  -9   88.00    2.85
  -8  -1  -9   93.52    7.08
  -8   1  -9   85.73    2.99
   8  -2  -8    8.28    1.25
   8   2  -8    6.63    0.64
   8   2  -8    5.57    0.92
  -8   2   8    7.55    1.66
   8  -2  -8    7.16    0.72
  -8   2   8    5.61    0.48
  -8  -2   8    9.90    1.90
  -5  -1  11   26.73    2.39
  -5   1  11   26.22    2.26
   5  -1 -11   18.10    1.01
   5   1 -11   19.56    1.02
  -5  -1  11   20.52    1.38
   5  -1 -11   21.56    1.11
   5   1 -11   21.58    1.41
  -3   4  -7   58.42    3.15
  -3   4  -7   53.94    4.13
   3   4   7   56.88    2.50
  -3   4  -7   59.40    2.83
   3   4   7   54.87    2.24
   3  -4   7   55.98    3.04
   3   4   7   57.07    2.76
   3   4   7   54.52    3.34
   3  -4   7   57.08    2.40
   9  -1   8   17.79    1.59
   9   1   8   20.36    0.97
  -9   1  -8   18.13    1.03
   9  -1   8   18.55    1.15
  -9   1  -8   18.99    0.95
  -9   1  -8   20.16    1.70
   9   1   8   22.99    1.73
  -9  -1  -8   19.14    1.16
   7   4  -3   28.72    1.56
   7  -4  -3   26.07    1.53
  -7  -4   3   27.56    2.59
   7  -4  -3   29.91    1.62
   7   4  -3   28.09    2.10
   7  -4  -3   30.28    2.16
  -7  -4   3   26.82    2.99
   5   1  11    3.19    1.21
  -5   1 -11    5.00    0.49
  -5   1 -11    4.77    0.78
  -5  -1 -11    5.62    2.14
  -5   1 -11    5.21    1.07
   7  -4   3    1.30    0.79
   7   4   3    0.06    1.35
   7   4   3    0.57    0.43
   7   4   3    0.39    0.73
   7  -4   3    0.59    0.59
   7   4   3    1.00    0.48
   7  -4   3    1.22    0.65
   7  -4   3    0.84    1.14
 -12  -1   1  264.62    9.83
  12  -1  -1  264.93    7.56
  12   1  -1  246.53    7.05
 -12   1   1  281.80   10.19
 -12  -1   1  264.04    8.48
  12  -1  -1  272.06    7.90
   8   2   8   66.97    3.10
   8  -2   8   62.04    3.04
  -8  -2  -8   70.89    2.94
  -8  -2  -8   76.72    6.40
   8   2   8   67.03    2.26
  -8   2  -8   69.44    2.34
  -8   2  -8   63.51    2.43
   8  -2   8   68.26    2.70
  -8   2  -8   67.50    3.27
 -12  -1  -1   69.53    3.22
  12   1   1   70.67    2.55
  12  -1   1   67.46    2.51
 -12   1  -1   65.69    2.35
  12   1   1   70.32    2.35
  12  -1   1   71.04    2.43
 -12  -1  -1   69.71    4.35
 -12   1  -1   67.95    4.04
   0   3 -10    2.12    1.95
   0  -3 -10    1.10    0.48
   0   3 -10    0.95    0.66
   0   3 -10    1.44    1.00
   0  -3  10    2.14    1.26
   0  -3 -10    1.15    0.53
   0  -3 -10    1.16    0.74
   0   3 -10    0.79    0.49
   0   3  10    1.35    0.90
  -6   3   8   10.73    0.61
   6  -3  -8   10.65    1.26
   6   3  -8    9.71    0.84
  -6  -3   8    8.37    1.83
   6  -3  -8   10.28    0.96
  -6   3   8   11.29    1.68
   6  -3  -8   10.31    0.82
   6   3  -8   11.04    1.44
 -11   1   5    1.30    1.55
 -11  -1   5   -0.72    1.65
  11   1  -5    0.54    0.48
  11   1  -5    0.70    0.37
  11  -1  -5    0.39    0.41
  11  -1  -5    0.75    0.43
  -3   0  12   -0.31    0.86
   3   0 -12    0.08    0.25
   3   0 -12    0.11    0.42
   3   0 -12   -0.01    0.33
  -3   0  12   -0.26    1.23
  -3   0 -12   -1.32    1.70
  -3   0 -12   -0.02    0.39
   3   0  12   -0.40    1.04
  -8  -3   6  109.25    5.08
  -8   3   6  130.58    5.83
   8   3  -6  126.76    4.79
   8  -3  -6  129.52    4.31
   8  -3  -6  118.08    4.84
  -8  -3   6  125.24    5.88
   8   3  -6  118.09    3.87
  -6   3  -8   48.39    2.51
   6   3   8   43.29    1.75
  -6   3  -8   42.78    2.60
   6  -3   8   42.75    2.02
  -6   3  -8   40.46    1.87
  -6   3  -8   55.75    5.70
  -6  -3  -8   46.92    3.77
  -6   3  -8   40.23    1.67
   6   3   8   45.53    2.47
   6  -3   8   46.33    2.61
  11  -1   5  151.91    4.64
  11   1   5  152.93    4.52
 -11  -1  -5  142.02    4.49
 -11   1  -5  159.97    4.78
  11  -1   5  155.45    5.03
 -11  -1  -5  155.43    5.68
  11  -1   5  144.92    5.26
  -3   2  11    5.94    1.38
   3   2 -11    4.21    1.06
   3  -2 -11    4.70    0.65
  -3   2  11    5.90    1.79
   3  -2 -11    5.04    0.98
   3   2 -11    4.55    0.69
   3  -2 -11    4.48    0.57
  -3   2  11    5.18    0.75
   3   2 -11    5.09    0.64
   8   3   6    7.06    1.12
  -8   3  -6    5.67    0.66
   8  -3   6    6.27    0.78
   8   3   6    6.69    0.58
   8  -3   6    6.59    0.81
   8  -3   6    6.04    1.11
  -8  -3  -6    7.32    0.88
  -3  -2 -11   62.91    3.84
   3  -2  11   65.87    3.30
  -3   2 -11   72.68    5.08
  -3  -2 -11   67.09    2.62
  -3   2 -11   65.33    3.20
  -3   2 -11   63.91    2.59
   3   2  11   61.02    2.97
   3  -2  11   69.42    2.67
  -3   2 -11   63.48    2.39
   1   3 -10    1.37    0.98
   1  -3 -10    0.88    0.74
   1  -3 -10    0.93    0.47
   1   3 -10    1.23    0.55
  -1  -3  10    0.73    1.32
   1   3 -10    1.54    0.63
   1   3 -10    2.19    1.64
  -1   3  10    2.27    1.74
   1  -3 -10    1.22    0.52
  -1   3  10    1.08    0.86
  -1   3  10    1.06    0.39
  -7   2   9    2.67    1.35
  -7  -2   9    2.72    1.43
  -7   2   9    2.42    0.37
   7  -2  -9    2.76    1.00
   7   2  -9    2.74    0.85
   7   2  -9    2.65    0.48
   7  -2  -9    2.68    0.53
   7  -2  -9    2.24    0.51
   1  -3  10    4.53    1.21
   1   3  10    3.30    1.04
  -1  -3 -10    3.08    0.91
  -1   3 -10    2.67    2.10
  -1   3 -10    3.04    0.78
  -1   3 -10    3.15    1.05
  -1   3 -10    3.12    0.65
  -1  -3 -10    3.34    0.63
 -10  -3   0    7.91    2.04
 -10  -3   0    9.74    1.28
  10  -3   0    8.69    1.72
  10   3   0    8.58    1.00
  10  -3   0    8.41    0.80
  10  -3   0    8.55    0.92
  10   3   0    9.42    0.71
   2  -1 -12    7.27    0.86
  -2  -1  12    7.56    1.49
  -2   1  12    6.63    1.35
   2   1 -12    7.53    0.59
   2   1 -12    7.73    0.78
   2  -1 -12    8.58    0.65
  -2   1  12    7.57    1.18
   2   1 -12    7.24    0.94
   2   1  12    6.96    1.31
  -2  -1 -12    7.52    0.59
  -2   1 -12    7.85    1.15
   2  -1  12    7.04    1.16
  -2   1 -12    7.40    0.76
  -2  -1 -12    8.18    1.80
   9  -2  -7  175.37    6.47
  -9   2   7  164.84    6.76
   9  -2  -7  184.07    5.57
   9   2  -7  187.88    5.60
  -9  -2   7  182.12    7.34
   9   2  -7  175.18    5.73
   9  -2  -7  171.13    5.21
  -7   2  -9   11.92    1.49
  -7   2  -9    7.69    0.88
  -7   2  -9   15.35    4.07
  -7  -2  -9   10.26    0.97
  -7  -2  -9   11.97    2.54
  -7   2  -9    9.37    0.62
   7  -2   9    9.77    0.92
   7   2   9    9.96    0.57
   7   2   9   12.59    1.30
   7  -2   9   14.49    1.41
 -12   0   3    0.73    1.76
  12   0  -3   -0.24    0.33
  12   0  -3    0.06    0.33
   2   5  -2    9.83    1.42
  -2  -5   2   10.60    1.96
   2   5  -2   10.27    1.12
   2  -5  -2   10.24    0.97
   2  -5  -2    9.60    1.01
   2   5   2    9.07    1.33
  -2   5  -2    7.43    2.06
   2   5   2    7.72    0.96
   2  -5   2    8.64    1.68
  -2   5  -2    7.83    1.32
   2  -5   2    8.93    0.91
   9   2   7    9.13    0.58
  -9  -2  -7   10.49    1.00
   9  -2   7    9.23    0.85
   9  -2   7    8.65    1.18
  -9   2  -7    8.85    0.56
   9  -2   7    8.96    0.87
  -9   2  -7    8.88    0.71
   9   2   7   10.78    1.25
 -11  -2   3    4.36    2.03
  11   2  -3    1.95    0.60
 -11   2   3    5.72    1.72
  11  -2  -3    2.36    0.54
  11  -2  -3    6.20    1.54
  11   2  -3    2.06    0.46
  12   0   3   -0.22    0.31
  12   0   3   -0.03    0.43
 -12   0  -3   -0.22    0.39
  10   3  -1   17.03    1.25
 -10  -3   1   18.15    2.41
  10  -3  -1   15.56    1.89
  10  -3  -1   19.38    1.23
 -10  -3   1   18.41    1.68
  10  -3  -1   19.19    1.24
  10   3  -1   18.48    1.04
  10  -3   1    9.48    1.82
  10  -3   1   10.75    0.94
  10   3   1    8.75    0.92
 -10  -3  -1   10.68    2.08
  10  -3   1    9.81    1.13
  10  -3   1   10.12    0.91
  10   3   1   10.69    0.75
 -10  -3  -1    9.36    1.26
  11  -2   3   27.02    1.84
  11  -2   3   28.82    2.74
 -11  -2  -3   30.26    2.06
  11  -2   3   30.43    1.47
 -11   2  -3   30.84    1.33
  11  -2   3   32.07    1.65
  11   2   3   29.15    1.36
  11   2   3   30.61    1.31
   5  -4  -6   70.59    2.76
  -5  -4   6   66.86    4.03
   5  -4  -6   70.56    2.82
  -5  -4   6   60.86    4.21
   5   4  -6   69.64    2.83
   5   4  -6   79.05    3.64
   6  -4  -5   51.37    2.26
   6   4  -5   53.32    2.89
  -6  -4   5   55.00    4.02
   6  -4  -5   50.87    2.21
  -6  -4   5   55.17    3.79
   6  -4  -5   50.89    2.58
  -7   1  10   42.51    2.97
  -7   1  10   37.31    1.52
   7   1 -10   36.75    1.52
  -7  -1  10   41.47    2.99
   7  -1 -10   43.25    1.72
   7  -1 -10   36.55    1.50
  -7  -1  10   43.35    2.01
   5  -4   6   91.16    4.02
   5   4   6   92.15    3.83
   5   4   6   95.31    3.43
   5   4   6   96.21    3.46
   5   4   6   90.16    3.89
   5  -4   6  102.09    3.74
  -5   4  -6  118.99    7.88
  -5   4  -6   86.53    3.79
   5   4   6   86.18    4.46
   6   4   5   12.22    1.26
   6   4   5   10.14    1.26
   6   4   5    9.18    0.88
   6  -4   5    9.60    0.95
   6   4   5   12.01    1.92
   6   4   5    9.55    0.86
   6  -4   5   12.07    1.35
  12  -1  -2    3.58    0.51
 -12   1   2    4.07    1.84
  12   1  -2    3.50    0.49
 -12  -1   2    3.26    1.90
  12  -1  -2    3.22    0.57
  12   1  -2    3.12    0.49
   0  -5  -3   -0.13    0.58
   0  -5  -3    0.28    0.58
   0   5  -3    0.15    1.51
   0   5  -3    0.11    0.95
   0  -5   3    1.28    1.31
   0  -5   3    0.57    0.59
  12  -1   2    3.28    0.51
  12   1   2    2.50    0.47
 -12  -1  -2    3.04    1.71
  12   1   2    2.88    0.42
 -12   1  -2    2.61    0.45
  12  -1   2    2.92    0.57
 -12  -1  -2    2.05    0.74
   3   5   0   14.56    1.60
   3   5   0   13.70    1.19
  -3  -5   0   15.50    2.08
  -7  -1 -10  126.11    4.37
   7  -1  10  115.40    4.53
  -7   1 -10  121.31    7.60
  -7   1 -10  114.30    3.86
  -7   1 -10  119.38    4.75
  -7  -1 -10  115.06    6.57
   7  -1  10  116.12    3.98
  -7   1 -10  118.93    3.64
   7   1  10  118.40    4.57
 -10  -1   7   48.88    3.42
 -10   1   7   51.33    3.44
  10   1  -7   52.86    2.09
  10  -1  -7   49.53    1.86
  10   1  -7   49.39    1.84
  10  -1  -7   50.23    2.01
 -10   1  -7   10.44    0.71
  10  -1   7   10.88    0.93
 -10  -1  -7   11.38    0.81
 -10   1  -7    9.77    0.62
  10   1   7   11.47    0.65
  10  -1   7    9.51    0.83
  10   1   7   11.19    1.29
  10  -1   7   11.69    1.33
   1   5  -3   54.62    3.45
  -1  -5   3   58.79    2.43
   1  -5  -3   53.47    2.34
   1   5  -3   56.65    3.02
  -1  -5   3   56.41    3.69
   1  -5  -3   53.71    2.35
  -1   5  -3    1.27    1.02
  -1   5  -3    3.67    1.88
   1  -5   3    1.13    0.63
  -1  -5  -3    1.01    0.62
   1  -5   3    3.35    1.36
   3  -5  -1   70.51    2.85
   3   5  -1   85.53    3.82
   3   5  -1   76.97    3.13
  -3  -5   1   76.34    4.46
   3  -5  -1   72.68    2.92
   3  -5   1   12.66    1.11
   3   5   1   13.28    1.22
   3   5   1   12.80    1.48
   3  -5   1   14.08    1.15
   2   3 -10   50.65    3.33
   2  -3 -10   48.69    2.58
  -2   3  10   49.95    2.77
   2   3 -10   55.75    2.43
   2   3 -10   49.68    2.27
   2  -3 -10   54.92    2.39
  -2   3  10   53.37    3.70
  -2  -3  10   49.89    3.03
   2   3 -10   50.79    2.77
  -2   3  10   53.99    2.01
   2  -3 -10   52.76    2.16
   2   3  10   42.59    2.44
  -2   3 -10   40.54    2.46
   2  -3  10   40.45    2.54
  -2  -3 -10   42.46    1.96
   2  -3  10   44.09    1.99
  -2   3 -10   41.81    1.90
  -2  -3 -10   36.48    2.12
  -2   3 -10   48.85    4.08
  -6   0  11   -0.32    1.31
   6   0 -11   -0.06    0.26
   6   0 -11   -0.24    0.38
  -6   0 -11   -0.04    0.40
   6   0  11   -0.17    0.96
  -6   0 -11   -1.55    1.99
  10   3  -2   25.40    1.67
 -10  -3   2   28.71    2.98
  10   3  -2   27.57    1.33
  10  -3  -2   28.26    2.34
 -10   3   2   25.43    2.41
  10  -3  -2   26.87    1.45
   0  -4   8    7.19    1.42
   0   4  -8    9.51    2.04
   0   4   8    8.35    1.20
   0   4  -8    6.67    1.27
   0  -4  -8    7.26    0.78
   0  -4   8    7.48    0.82
   0  -4  -8    7.18    0.81
   0   4   8    7.77    0.59
   0   4  -8   10.39    1.28
  10  -3   2    1.23    0.58
  10  -3   2    2.20    0.67
  10  -3   2    2.40    1.52
 -10  -3  -2    3.27    1.57
 -10  -3  -2    1.08    0.87
  10   3   2    1.35    0.46
  10  -3   2    3.81    0.92
  10   3   2    1.12    0.63
  11   0  -6    0.05    0.40
  11   0  -6   -0.04    0.35
 -11   0   6   -1.03    1.52
  -8  -4   0   18.13    1.61
   8  -4   0   17.90    1.27
   8   4   0   19.65    1.69
  -8  -4   0   18.62    2.43
   8  -4   0   19.77    1.33
   8   4   0   18.35    1.19
  -8  -4   0   14.54    1.64
   8  -4   0   14.24    1.27
  11   0   6   -0.57    0.82
 -11   0  -6    0.08    0.36
  11   0   6    0.13    0.29
 -11   0  -6   -0.09    0.32
  -1   4   8   42.22    2.47
   1  -4  -8   41.19    1.95
  -1  -4   8   43.78    2.92
   1  -4  -8   38.17    1.87
  -1   4   8   39.94    1.57
   1   4  -8   40.48    3.14
   1   4  -8   39.94    2.07
   1   4  -8   42.19    2.45
  -1   4  -8   10.77    2.38
   1   4   8    9.03    0.96
   1   4   8    9.25    1.25
  -1   4  -8   10.17    1.21
   1  -4   8   10.14    0.89
  -1   4  -8    9.02    1.45
  -1  -4  -8    9.52    0.93
   1  -4   8   10.10    1.62
   4  -4  -7   12.18    1.07
  -4   4   7   10.15    0.68
   4  -4  -7   12.04    0.97
  -4  -4   7    9.71    2.33
   4   4  -7   11.72    1.12
   4   4  -7   10.92    1.47
  -4  -4   7   14.38    2.09
   4  -4  -7   12.97    1.22
   3   1 -12  133.88    4.62
   3  -1 -12  118.50    3.99
   3   1 -12  116.75    3.97
  -3  -1  12  131.25    5.36
   3  -1 -12  138.16    4.25
   3   1 -12  127.55    3.99
  -3   1  12  127.39    4.74
  -3   1  12  128.36    5.15
  -5  -3   9   11.01    1.85
   5  -3  -9   12.49    1.02
   5   3  -9   10.72    0.85
  -5   3   9    9.19    0.56
  -5   3   9   11.97    1.62
   5  -3  -9   11.00    0.85
   5  -3  -9   12.41    1.29
   4   4   7   76.33    3.34
   4   4   7   78.79    4.16
   4  -4   7   88.05    3.32
   4   4   7   83.30    3.16
   4   4   7   82.02    3.04
  -4   4  -7   76.97    5.23
  -4   4  -7   82.29    3.79
   4   4   7   81.10    3.57
   4  -4   7   79.20    3.73
   3   1  12   30.61    2.08
  -3  -1 -12   34.55    3.21
  -3  -1 -12   34.86    1.47
  -3   1 -12   35.71    2.19
  -3   1 -12   34.06    1.82
   7  -4  -4    3.01    0.67
  -7  -4   4    4.46    1.74
   7  -4  -4    6.06    0.98
  -7  -4   4    7.43    2.09
   7   4  -4    4.24    1.17
   7   4  -4    2.99    0.72
  -5  -3  -9    3.71    1.56
   5   3   9    5.04    1.13
  -5   3  -9    3.40    0.56
  -5   3  -9    3.46    1.19
   5  -3   9    4.39    1.14
  -5   3  -9    2.40    0.60
  -5   3  -9    3.37    2.44
   5   3   9    2.51    0.44
   5  -3   9    3.21    0.73
   7   4   4   83.18    3.61
   7  -4   4   82.55    3.14
  -7  -4  -4   73.59    5.01
   7  -4   4   84.26    3.17
   7   4   4   82.77    2.99
   7  -4   4   78.58    3.55
   7  -4   4   75.05    4.15
  -8  -4   1    9.35    2.25
   8  -4  -1   10.68    0.97
   8   4  -1   11.52    1.38
   8  -4  -1   10.64    1.39
  -8  -4   1    9.49    1.58
   8   4  -1   10.78    0.89
   8  -4  -1   10.16    1.13
  -9   3   5   31.22    2.88
  -9  -3   5   28.51    2.36
   9  -3  -5   30.29    2.18
   9  -3  -5   31.32    1.57
   9  -3  -5   30.25    1.52
  -9  -3   5   31.05    2.93
   9   3  -5   32.83    2.03
   8   4   1   61.45    2.40
   8  -4   1   64.23    2.63
   8  -4   1   51.29    2.61
   8  -4   1   63.47    2.60
  -8  -4  -1   63.60    4.04
   8   4   1   63.13    3.08
   2   5  -3   36.63    2.39
   2   5  -3   36.12    1.95
   2  -5  -3   35.66    1.85
  -2  -5   3   39.58    3.19
   2  -5  -3   37.27    1.91
   2  -5   3   83.34    3.14
   2   5   3   87.17    3.38
  -2   5  -3   84.13    3.73
   2   5   3   83.92    3.67
  -2   5  -3   82.80    5.04
   2  -5   3   89.76    4.61
  -3  -5   2   75.18    4.49
   3   5  -2   71.49    2.96
   3  -5  -2   76.31    3.06
   3   5  -2   74.84    3.55
   3  -5  -2   73.55    2.92
   6  -2 -10   35.20    1.54
   6  -2 -10   39.35    2.38
  -6   2  10   35.63    2.60
  -6  -2  10   34.54    1.83
   6   2 -10   36.67    1.59
   6  -2 -10   36.72    1.71
  -6  -2  10   31.17    2.58
   3   5   2   26.41    1.98
   3  -5   2   27.51    2.81
  -3   5  -2   38.30    4.91
   3   5   2   28.49    1.68
   3  -5   2   29.52    1.66
   9  -3   5   12.80    1.27
   9  -3   5   16.29    1.10
   9  -3   5   15.56    1.13
   9   3   5   15.18    0.81
  -9  -3  -5   15.69    1.19
   9  -3   5   13.48    1.88
   4   0 -12  483.47   13.24
  -4   0  12  478.46   14.67
   4   0 -12  471.87   13.14
   6  -2  10  102.81    4.26
  -6   2 -10  107.89    3.74
  -6  -2 -10   98.85    6.00
  -6   2 -10  114.99    4.73
  -6   2 -10  122.61    7.25
   6   2  10  109.73    4.30
  -6   2 -10  110.47    3.45
   6  -2  10  104.03    3.68
  12   1  -3   16.82    0.89
  12  -1  -3   18.52    1.05
  12   1  -3   17.71    0.94
 -12  -1   3   16.82    2.49
 -12   1   3   19.62    2.56
  10   2  -6   13.96    0.78
  10  -2  -6   14.52    0.90
  10  -2  -6   13.91    0.83
  10  -2  -6   15.53    1.68
 -10  -2   6   20.89    2.66
 -10   2   6   17.35    2.18
  10   2  -6   15.13    1.09
  -4   0 -12   98.96    5.76
  -4   0 -12  101.65    3.68
   4   0  12  101.14    4.57
   4   2 -11    5.48    0.70
   4   2 -11    5.80    1.04
  -4   2  11   15.92    1.70
   4  -2 -11    4.74    0.60
   4   2 -11    7.45    0.68
   4  -2 -11    6.76    0.78
  12   1   3   34.01    1.61
 -12   1  -3   32.96    1.46
  12  -1   3   35.07    1.72
 -12  -1  -3   32.82    2.11
  12  -1   3   32.34    1.42
  12   1   3   31.82    1.35
  10   2   6  107.71    4.39
  10  -2   6  107.14    3.81
  10   2   6  111.03    3.65
 -10  -2  -6  117.60    4.27
  10  -2   6  110.05    4.01
 -10   2  -6  106.33    3.62
  10  -2   6  104.12    4.31
  -4  -2 -11   24.92    1.35
  -4  -2 -11   28.27    2.77
  -4   2 -11   27.14    1.32
  -4   2 -11   28.21    1.88
   4  -2  11   27.56    2.15
  -4   2 -11   30.86    3.50
   4  -2  11   28.52    1.31
   4   2  11   25.02    1.80
  -4   2 -11   26.46    1.29
 -12   0   4   64.50    4.30
  12   0  -4   62.63    2.33
 -11   2   4   27.92    2.64
  11  -2  -4   24.18    2.12
 -11  -2   4   26.12    2.91
  11   2  -4   23.11    1.17
  11  -2  -4   25.50    1.15
  11  -2  -4   23.53    1.03
   3  -3 -10   35.73    1.83
   3   3 -10   35.41    1.79
   3   3 -10   37.58    1.89
  -3   3  10   37.06    2.96
  -3  -3  10   35.99    2.70
  -3   3  10   37.92    2.47
   3   3 -10   35.92    2.38
  -3   3  10   29.81    1.10
   3  -3 -10   40.28    2.33
   3  -3 -10   36.74    1.73
  -2  -4   8   15.58    1.86
   2  -4  -8   16.10    1.34
   2  -4  -8   12.18    0.98
  -2   4   8   14.82    1.47
  -2   4   8   10.80    0.70
  -2   4   8   10.01    0.64
   2  -4  -8   11.43    1.01
   2   4  -8   13.42    1.94
   2   4  -8   12.05    1.14
 -12   0  -4  441.62   13.40
  12   0   4  448.67   13.20
  12   0   4  452.98   13.69
  -2   4  -8   82.20    3.61
   2  -4   8   76.51    3.87
   2  -4   8   81.72    3.17
   2   4   8   80.57    3.28
   2   4   8   76.04    3.44
  -2   4  -8   87.21    5.37
  -2  -4  -8   82.36    3.26
  -2   4  -8   77.33    3.74
  11  -2   4  308.62    9.48
  11  -2   4  284.48    9.51
  11   2   4  307.67    9.25
  11  -2   4  293.41    9.46
 -11   2  -4  311.01    9.36
 -11  -2  -4  308.41   10.40
  11  -2   4  293.71   11.01
  -3   3 -10    1.58    2.28
   3   3  10    0.22    0.85
   3  -3  10    0.14    0.52
  -3   3 -10    0.06    0.92
   3  -3  10    0.36    0.91
  -3   3 -10    0.14    0.54
   8  -4  -2   77.20    3.71
  -8  -4   2   68.44    3.86
  -8  -4   2   77.57    4.80
   8   4  -2   80.86    3.09
   8   4  -2   81.92    3.78
   8  -4  -2   84.35    3.29
   8  -4  -2   74.26    3.38
   0  -5  -4  289.18    9.22
   0  -5  -4  284.84    9.07
   0   5  -4  296.88   10.15
   0   5  -4  290.06   11.09
   0  -5   4  296.49    9.33
   0  -5   4  279.21   10.47
   8   4   2  145.49    5.60
   8   4   2  143.17    4.84
   8  -4   2  150.69    5.22
   8  -4   2  127.15    4.99
   8  -4   2  153.53    5.29
   8  -4   2  140.18    6.50
  -8  -4  -2  142.63    6.61
   9   0  -9  105.76    3.61
   9   0  -9  110.06    3.63
  -9   0   9  113.70    5.44
   4   5   0    8.70    1.40
  -4  -5   0   19.62    2.36
   4   5   0    9.73    1.07
  10  -3  -3   10.78    1.50
  10  -3  -3   10.04    0.85
 -10   3   3   10.31    1.88
  10   3  -3   10.39    0.76
  10  -3  -3   10.77    0.89
  10   3  -3   10.32    1.16
 -10  -3   3    9.53    2.29
  10  -3   3   69.06    4.22
  10  -3   3   73.35    2.91
 -10  -3  -3   72.67    3.48
  10  -3   3   66.68    3.16
  10   3   3   74.87    2.72
  10  -3   3   71.24    2.88
  10   3   3   73.33    3.01
   6   1 -11  273.47    8.82
  -6  -1  11  269.84    9.78
   6  -1 -11  251.10    7.69
   6  -1 -11  265.78    8.17
   6   1 -11  234.22    7.54
  -6   1  11  265.60    9.58
  -9   0  -9   83.70    3.82
  -9   0  -9   87.05    3.11
  -9   0  -9   86.40    3.03
   9   0   9   86.08    3.05
   1   5  -4  270.12   10.10
   1  -5  -4  277.01    8.86
  -1  -5   4  286.78   10.76
  -1  -5   4  303.45    9.54
   1  -5  -4  270.53    8.65
   1   5  -4  294.55   10.12
  -6  -1 -11    0.38    0.45
  -6   1 -11    0.09    0.75
  -6   1 -11   -0.72    2.06
   6   1  11    0.95    1.10
  -6   1 -11    0.41    0.30
   6  -1  11    0.38    1.05
   1  -5   4    7.30    1.56
  -1  -5  -4    6.02    0.85
   1  -5   4    6.28    0.83
  -1   5  -4    5.88    1.87
  -1   5  -4    5.70    1.18
   4   5  -1   53.52    2.97
   4   5  -1   53.16    2.52
  -4  -5   1   51.28    3.61
   4  -5   1   18.32    1.25
  -4  -5  -1   25.88    2.44
   4   5   1   15.10    1.57
   4  -5   1   16.95    1.30
   4   5   1   15.94    1.24
 -11  -1   6   -0.47    1.65
  11   1  -6    0.21    0.36
  11  -1  -6    0.15    0.41
  11   1  -6    0.07    0.44
  11  -1  -6    0.36    0.37
 -11   1   6    0.66    1.54
  -8   0  10   39.27    2.98
   8   0 -10   39.03    1.70
  -8   0  10   37.64    1.71
  11  -1   6  124.23    4.39
 -11   1  -6  127.50    4.15
 -11  -1  -6  121.89    4.18
  11   1   6  124.95    4.01
  11  -1   6  124.21    4.15
  11   1   6  129.89    5.03
  11  -1   6  124.59    4.89
   3   5  -3   64.37    2.88
   3  -5  -3   66.75    2.86
   3  -5  -3   63.71    2.72
  -3  -5   3   66.86    4.19
   3   5  -3   65.92    3.40
   3   5   3   15.71    1.15
   3  -5   3   18.71    2.01
   3   5   3   17.47    1.38
   3  -5   3   17.42    1.24
  -3   5  -3   18.46    3.23
   3   5   3   17.03    1.52
  -3   5  -3   16.02    1.61
 -10   0   8  438.05   14.88
  10   0  -8  412.37   13.56
  10   0  -8  452.10   13.72
  -8   0 -10  457.09   13.51
  -8   0 -10  505.26   15.79
  -8   0 -10  447.38   13.28
  -8   0 -10  644.75   24.67
  10   0   8   28.66    1.49
 -10   0  -8   28.36    1.83
 -10   0  -8   31.30    1.16
   4  -1 -12   47.96    1.93
   4   1 -12   46.40    2.24
  -4  -1  12   47.95    3.03
  -4   1  12   46.95    2.87
   4   1 -12   39.76    1.88
   4   1 -12   43.33    1.77
   4  -1 -12   44.69    1.93
   6   4  -6    8.45    0.86
   6   4  -6    9.57    1.36
   6  -4  -6    7.40    0.83
  -6  -4   6   10.12    2.17
   6  -4  -6    8.98    0.93
  -6  -4   6    8.74    2.00
   7  -3  -8   47.38    2.16
   7   3  -8   44.57    1.95
   7  -3  -8   47.56    2.69
  -7   3   8   47.28    3.16
  -7  -3   8   45.99    3.32
   7  -3  -8   45.85    1.99
   7   3  -8   48.89    2.69
  -7   3   8   50.10    1.86
  -8   3   7   43.19    3.11
   8  -3  -7   41.82    1.97
  -8  -3   7   41.32    3.28
   8   3  -7   44.20    2.49
   8   3  -7   41.01    1.81
   8  -3  -7   41.43    2.51
   4   1  12    2.12    1.08
  -4  -1 -12    2.00    0.45
  -4   1 -12    2.66    0.94
  -4  -1 -12    3.77    1.93
  -4   1 -12    2.41    0.58
  -6   4  -6    4.27    1.13
   6   4   6    3.81    0.68
   6  -4   6    3.69    1.05
   6   4   6    3.81    0.94
   6   4   6    4.83    0.68
   6   4   6    4.50    1.45
   6  -4   6    5.18    0.83
  -7   3  -8   25.08    1.20
  -7   3  -8   30.34    2.00
   7  -3   8   29.08    1.86
  -7  -3  -8   29.56    2.99
   7  -3   8   30.26    1.45
   7   3   8   30.64    1.09
   7   3   8   30.67    1.88
   2   5  -4    5.53    1.31
  -2  -5   4    3.85    1.69
   2  -5  -4    5.06    0.84
   2  -5  -4    5.24    0.87
   2   5   4   25.32    1.71
   2  -5   4   34.68    2.73
   2   5   4   27.74    1.46
  -2   5  -4   28.72    2.86
  -2   5  -4   26.48    1.88
   2  -5   4   25.63    1.36
   4  -5  -2  257.23    8.30
   4   5  -2  270.15    9.32
   4   5  -2  266.48    8.67
   4  -5  -2  302.33    9.73
  -4  -5   2  253.01    9.99
   8  -3   7   22.60    1.64
   8   3   7   24.71    0.97
   8  -3   7   24.49    1.29
   8   3   7   26.16    1.73
  -8  -3  -7   31.93    4.55
   4   5   2   13.30    1.43
   4  -5   2   15.97    1.24
   4  -5   2   15.04    1.17
   4   5   2   15.36    1.17
  -3  -4   8   22.55    2.28
   3   4  -8   22.20    1.84
   3  -4  -8   21.18    1.20
   3  -4  -8   23.92    1.46
  -3   4   8   20.34    0.89
   3  -4  -8   22.03    1.53
   3   4  -8   22.50    1.35
  -3   4  -8    3.95    2.26
   3   4   8    4.67    0.95
  -3   4  -8    6.26    1.04
   3  -4   8    5.53    1.23
  -3   4  -8    2.61    1.21
   3   4   8    3.35    0.72
   3   4   8    4.55    1.29
   3  -4   8    1.16    0.62
 -12   1   4   12.16    2.15
  12   1  -4   12.01    0.77
 -12  -1   4   13.58    2.47
  12  -1  -4   13.14    0.82
  12  -1  -4   10.94    0.69
   8  -4  -3   85.38    3.31
   8   4  -3   87.92    3.99
   8  -4  -3   85.02    3.88
  -8  -4   3   78.38    4.30
   8   4  -3   87.40    3.24
  -8  -4   3   90.11    5.17
   8  -4  -3   96.06    3.62
   0   2 -12   47.81    2.69
   0   2  12   41.55    3.65
   0  -2 -12   48.12    2.02
   0  -2  12   42.89    2.73
   0   2  12   44.55    2.65
   0   2 -12   43.30    2.01
   0   2 -12   47.53    2.20
   0   2 -12   43.86    3.32
   8  -4   3   41.48    2.01
   8  -4   3   38.69    1.94
   8   4   3   40.59    1.83
   8   4   3   41.40    2.40
   8  -4   3   39.02    3.11
   8  -4   3   38.56    2.28
  12  -1   4   72.50    2.60
 -12  -1  -4   72.20    3.40
 -12   1  -4   76.89    2.72
  12  -1   4   76.42    2.98
  12   1   4   76.99    2.65
  12  -1   4   68.20    3.19
  -5  -4   7   67.76    4.11
   5  -4  -7   73.22    2.99
  -5  -4   7   62.18    4.27
   5  -4  -7   71.89    2.89
   5  -4  -7   66.82    3.14
   5   4  -7   70.05    2.90
   5   4  -7   75.37    3.64
   7   4  -5   84.82    3.86
  -7  -4   5   87.94    5.01
   7  -4  -5   84.82    3.34
  -7  -4   5   88.31    5.00
   5   4   7   66.08    3.15
  -5   4  -7   67.56    5.59
  -5   4  -7   58.54    3.10
   5   4   7   63.34    3.84
   5  -4   7   63.91    3.30
   5  -4   7   73.87    3.12
   5   4   7   66.17    2.70
   1   2 -12    1.30    0.46
  -1  -2  12    4.38    1.34
   1   2 -12    5.80    1.86
   1   2 -12    3.04    1.03
  -1   2  12    3.51    1.22
   1   2 -12    2.47    0.53
   1  -2 -12    2.33    0.47
   7   4   5   40.23    1.83
  -7  -4  -5   41.74    3.51
   7  -4   5   39.97    1.99
   7  -4   5   40.13    1.97
   7   4   5   41.94    2.36
   7  -4   5   42.38    2.51
   9   1  -9   22.72    0.95
   9  -1  -9   22.36    0.94
  -9  -1   9   21.91    2.45
  -9   1   9   19.81    2.19
   9   1  -9   21.52    1.11
  -1   2 -12   98.58    5.40
  -1   2 -12   91.99    3.46
   1   2  12  100.67    6.38
  -1  -2 -12   91.03    3.29
  -1   2 -12   97.58    4.27
   1  -2  12   89.68    4.14
   1   2  12   92.86    4.13
  -1   2 -12   99.96    3.83
  -4   3  10    5.67    1.49
   4   3 -10    4.75    1.10
  -4  -3  10    4.68    1.49
  -4   3  10    5.30    1.27
   4  -3 -10    5.49    1.00
   4   3 -10    4.95    0.73
   4  -3 -10    5.50    0.68
   4  -3 -10    5.16    0.75
  -8  -2   9   17.86    2.19
  -8   2   9   17.17    2.05
   8  -2  -9   17.44    1.63
   8  -2  -9   15.81    0.92
  -8   2   9   17.48    0.76
   8   2  -9   18.56    0.92
   8  -2  -9   17.23    0.92
   8   2  -9   19.51    1.35
  12   2   0    0.63    0.39
  12  -2   0    1.07    0.58
 -12  -2   0    3.68    2.04
  12  -2   0    2.35    1.46
 -12  -2   0    0.93    0.87
  12  -2   0    0.94    0.52
  12   2   0    0.60    0.38
   0   0  13   -0.62    0.93
   0   0 -13    0.20    0.42
   0   0 -13    0.04    1.44
  -9   2   8  272.30   10.08
   9  -2  -8  286.84    9.93
   9   2  -8  291.36    8.89
   9  -2  -8  287.38    8.85
  -9  -2   8  293.36   10.89
   9   2  -8  316.96   10.11
  -9  -1  -9   14.64    0.98
  -9   1  -9   14.74    1.53
   9   1   9   13.94    0.68
   9  -1   9   14.88    0.97
  -9   1  -9   14.28    0.71
   9   1   9   15.16    1.49
   9  -1   9   14.57    1.39
  -9   1  -9   13.41    0.79
   5   0 -12   -0.21    0.43
  -5   0  12    0.17    1.25
   5   0 -12   -0.07    0.29
  -4   3 -10    2.75    2.20
  -4  -3 -10    0.34    1.13
   4  -3  10    0.68    1.01
   4   3  10    1.18    0.87
   4  -3  10    1.14    0.60
  -4   3 -10    0.82    0.44
  -4   3 -10    0.89    0.99
  -8  -2  -9   15.03    2.98
  -8  -2  -9    9.30    0.94
   8   2   9    8.71    0.54
  -8   2  -9    4.97    0.62
   8  -2   9   18.08    1.53
   8   2   9   20.47    1.64
   8  -2   9    9.00    0.87
  -8   2  -9    6.45    0.59
  -8   2  -9   10.74    1.43
  -5   0 -12   -0.12    0.40
  -5   0 -12   -0.58    0.33
  -5   0 -12    1.44    2.13
  -5   0 -12    0.03    0.43
   5   0  12    0.31    0.98
  -5   2  11  250.16    9.02
   5   2 -11  247.19    8.32
   5  -2 -11  233.66    7.26
   5  -2 -11  248.10    8.00
   5   2 -11  250.74    7.78
   5   2 -11  248.61    7.93
  -9   2  -8   19.24    1.70
  -9   2  -8   19.59    0.98
   9  -2   8   20.38    1.16
   9   2   8   21.67    1.56
  -9  -2  -8   21.48    1.32
   9  -2   8   18.36    1.51
  -9   2  -8   20.82    0.82
   9   2   8   19.03    0.78
  10  -3  -4    3.98    1.15
 -10   3   4    4.49    1.65
 -10  -3   4    4.27    1.93
  10   3  -4    2.94    0.52
  10  -3  -4    3.41    0.64
  10  -3  -4    3.50    0.69
  10   3  -4    4.44    0.92
  -5   2 -11   20.29    1.62
  -5   2 -11   19.71    1.13
  -5   2 -11   20.22    3.17
   5  -2  11   19.68    1.13
  -5  -2 -11   19.28    2.61
   5  -2  11   19.97    1.72
  -5   2 -11   20.16    0.87
   5   2  11   19.69    1.63
   6   3  -9  154.76    5.87
   6  -3  -9  148.47    5.15
   6  -3  -9  139.67    4.74
  -6   3   9  146.39    6.14
  -6  -3   9  139.87    6.14
   6   3  -9  137.71    4.67
   6  -3  -9  142.36    5.52
  12  -2  -1   45.03    3.26
  12  -2  -1   42.92    1.82
  12  -2  -1   42.09    1.91
 -12  -2   1   38.92    2.36
  12   2  -1   43.24    1.85
  12   2  -1   46.27    1.83
 -12   2   1   45.49    3.37
 -12  -2   1   46.98    3.66
   1   0 -13  142.04    4.74
  -1   0  13  135.66    5.24
  -1   0  13  135.91    5.60
 -10  -3  -4   31.19    1.87
  10  -3   4   29.96    2.56
  10   3   4   32.40    1.44
  10  -3   4   30.86    1.42
  10  -3   4   31.98    1.66
  10  -3   4   29.49    1.79
  12  -2   1   64.06    4.05
 -12  -2  -1   64.92    4.19
  12   2   1   66.56    2.40
  12  -2   1   61.37    2.36
 -12  -2  -1   64.62    3.19
  12   2   1   67.85    2.58
  12  -2   1   68.49    2.71
  -1   0 -13  661.36   19.48
  -1   0 -13  632.85   20.61
   1   0  13  697.93   21.49
   7   0 -11   85.81    2.96
  -7   0  11   96.94    4.70
   7   0 -11   96.38    3.36
   8   1 -10   55.22    2.40
  -8  -1  10   58.14    2.48
  -8   1  10   51.95    2.00
  -8   1  10   60.41    3.66
   8  -1 -10   61.60    2.29
  -8  -1  10   59.76    3.68
   8  -1 -10   59.97    2.26
 -12   0   5   -0.33    1.48
  12   0  -5   -0.23    0.38
  12   0  -5   -0.05    0.40
  -6   3  -9   27.79    3.98
  -6  -3  -9   25.38    2.71
  -6   3  -9   25.43    1.05
   6  -3   9   27.77    1.40
  -6   3  -9   29.97    2.06
   6   3   9   25.14    1.71
   6  -3   9   25.27    1.76
   9  -3  -6    2.53    0.65
   9   3  -6    3.05    0.90
   9  -3  -6    2.77    0.63
   9  -3  -6    3.02    0.94
  -9  -3   6    2.51    1.79
  -9   3   6    4.03    1.58
   9   3  -6    3.01    0.54
  11  -2  -5    2.48    0.58
  11   2  -5    2.07    0.64
  11  -2  -5    3.60    1.41
  11  -2  -5    2.05    0.51
 -11  -2   5    3.07    2.16
 -11   2   5    3.22    1.67
  10  -1  -8  210.62    6.61
 -10   1   8  197.59    7.93
 -10  -1   8  199.10    8.07
  10  -1  -8  187.74    5.86
  10   1  -8  206.51    6.39
  10   1  -8  222.10    7.06
  12   0   5   -0.34    0.77
 -12   0  -5    0.24    0.43
  12   0   5   -0.13    0.33
   9  -3   6   76.01    3.04
   9   3   6   83.77    2.94
   9  -3   6   77.37    3.07
   9   3   6   75.87    3.43
  -9  -3  -6   78.56    3.28
   9  -3   6   66.68    3.19
   9  -3   6   66.62    3.90
 -13   0   0   -1.01    1.63
  13   0   0   -0.14    0.33
  13   0   0    0.12    0.40
  -7   0 -11  343.01   10.38
   7   0  11  352.57   11.49
  -7   0 -11  349.00   10.58
  -7   0 -11  325.36   13.11
  -7   0 -11  349.34   10.98
  -8   1 -10   54.38    2.02
  -8   1 -10   50.12    2.11
  -8   1 -10   56.71    2.99
   8  -1  10   56.40    2.89
   8   1  10   60.11    3.00
  -8  -1 -10   69.47    5.73
  -8  -1 -10   58.98    2.56
   8  -1  10   55.10    2.40
  -8   1 -10   70.14    6.54
  11  -2   5   49.39    2.09
 -11   2  -5   51.38    2.00
  11  -2   5   58.36    2.94
  11  -2   5   53.73    2.35
  11   2   5   51.85    1.95
 -11   0   7  342.31   12.22
  11   0  -7  308.00    9.33
  11   0  -7  357.31   10.63
  10  -1   8    1.11    0.59
  10  -1   8    1.84    0.93
  10   1   8    4.52    1.06
  10   1   8    1.61    0.34
 -10  -1  -8    1.71    0.46
 -10   1  -8    0.85    0.32
 -10   1  -8    0.68    0.33
   2   2 -12   26.40    1.39
   2   2 -12   25.47    1.20
   2  -2 -12   25.22    1.07
   2   2 -12   24.57    1.76
   2  -2 -12   23.66    1.23
  -2   2  12   24.01    1.44
  -2   2  12   24.73    2.00
   0  -5   5    7.83    0.91
   0   5  -5    6.85    1.29
   0  -5  -5    8.04    0.90
   0  -5  -5    6.98    0.86
   0   5  -5    7.22    1.80
   0  -5   5    7.17    1.64
   3  -5  -4   27.14    1.39
   3   5  -4   27.25    1.97
  -3  -5   4   25.54    2.50
   3  -5  -4   29.85    1.54
  -2   2 -12   32.96    2.19
   2   2  12   39.25    2.44
  -2  -2 -12   32.04    1.59
   2  -2  12   37.48    2.47
  -2   2 -12   31.89    1.81
  -2   2 -12   43.11    3.76
  -2   2 -12   31.72    1.61
  11   0   7   27.72    1.94
 -11   0  -7   26.32    1.02
 -11   0  -7   29.67    1.41
  11   0   7   29.44    1.30
   4  -5  -3    5.49    0.81
   4   5  -3    6.40    0.99
   4  -5  -3    6.47    0.93
  -4  -5   3    6.43    1.74
   4   5  -3    6.35    1.22
   3  -5   4   49.12    3.16
   3   5   4   47.68    2.63
   3   5   4   50.41    2.16
  -3   5  -4   48.26    2.73
  -3   5  -4   46.61    4.03
   3  -5   4   52.02    2.36
   3   5   4   53.58    2.49
   4  -5   3    8.17    0.96
   4   5   3    8.01    0.88
  -4   5  -3    8.42    3.42
   4   5   3    7.11    0.72
   4   5   3    7.76    1.16
   4  -5   3    7.67    1.50
   5  -5   0   18.84    1.23
   5   5   0   19.73    1.68
  -5  -5   0   20.05    2.39
   5   5   0   19.80    1.33
  13   0  -1  780.42   22.70
  13   0  -1  808.51    6.21
 -13   0   1  811.35   12.07
  13   0   1  104.22    3.43
 -13   0  -1  109.33    5.48
 -13   0  -1   99.63    3.78
  13   0   1  106.11    3.66
   1   5  -5   13.61    1.90
   1  -5  -5   12.16    1.07
   1   5  -5   10.19    1.46
  -1  -5   5   16.35    2.14
   1   5  -5    8.72    1.03
   1  -5  -5    9.35    0.92
  -1   5  -5    2.34    1.79
   1  -5   5    2.04    1.25
   1  -5   5    1.41    0.62
  -1  -5  -5    2.25    0.64
  -1   5  -5    0.65    1.06
   7  -2 -10    0.98    0.46
   7   2 -10    0.76    0.40
   7  -2 -10    0.86    0.44
  -7  -2  10    2.57    1.64
  -7   2  10    1.21    1.47
   5   5  -1   35.03    1.94
  -5  -5   1   33.63    2.99
   5   5  -1   36.06    2.37
   5  -5   1  239.16    7.80
   5   5   1  233.69    7.69
   5  -5   1  259.86    8.44
  -5  -5  -1  230.65    9.21
   5   5   1  224.54    7.95
  12  -2  -2  173.55    5.56
 -12  -2   2  186.21    8.04
  12  -2  -2  176.35    7.21
  12   2  -2  178.32    5.62
  12  -2  -2  176.29    5.73
 -12   2   2  190.33    7.90
  12   2  -2  187.14    6.01
  -2   0  13    0.96    1.16
  -2   0  13    0.07    0.71
   2   0 -13   -0.19    0.35
   2   0 -13   -0.02    0.25
   2   0 -13    0.03    0.43
  12  -2   2    9.49    0.78
 -12  -2  -2    9.01    2.15
 -12  -2  -2   10.14    1.28
  12   2   2    8.23    0.65
  12  -2   2    9.59    0.88
  12   2   2    9.79    0.67
   2   0  13    0.24    1.16
  -2   0 -13    0.30    1.57
  -2   0 -13   -0.10    0.42
  -7   2 -10  135.53    5.49
  -7   2 -10  130.32    4.54
   7  -2  10  131.22    4.63
   7   2  10  136.34    5.25
  -7   2 -10  138.69    4.42
  -7  -2 -10  121.36    6.48
  -7   2 -10  157.97    8.82
   7  -2  10  128.25    5.11
 -10  -2   7  138.54    6.38
  10  -2  -7  119.22    4.05
  10  -2  -7   97.72    4.42
  10   2  -7  127.53    4.22
  10   2  -7  133.16    4.67
 -10   2   7  131.52    6.02
  10  -2  -7  126.96    4.26
   0   3 -11    0.28    0.52
   0  -3  11    2.12    1.21
   0   3 -11    1.23    1.08
   0  -3 -11    1.02    0.45
   0   3 -11    3.53    1.87
   0   3  11    1.93    1.08
   0   3 -11    1.67    0.60
  10  -2   7   40.77    1.95
  10  -2   7   42.40    1.96
  10   2   7   44.27    1.72
 -10  -2  -7   44.40    2.14
 -10   2  -7   42.37    1.80
  10   2   7   40.67    2.41
  10  -2   7   40.17    2.38
  -4   4   8   44.72    1.75
   4   4  -8   55.58    2.52
   4  -4  -8   51.24    2.46
   4  -4  -8   49.15    2.61
  -4  -4   8   49.45    3.39
   4  -4  -8   53.28    2.33
   4   4  -8   55.63    3.03
   4  -4   8  220.73    7.37
   4   4   8  228.14    8.77
  -4   4  -8  225.22    8.13
   4   4   8  223.89    7.29
   4  -4   8  220.26    7.97
   4   4   8  231.80    7.95
  -4   4  -8  224.64    9.88
   8   4  -4  183.38    6.00
  -8  -4   4  183.79    7.70
   8  -4  -4  189.70    6.27
   8   4  -4  191.21    6.96
  -8  -4   4  192.26    8.25
   8  -4  -4  183.61    6.16
   8  -4   4    7.05    1.06
   8  -4   4    5.40    0.80
   8  -4   4    7.01    1.61
   8  -4   4    5.04    0.75
   8   4   4    4.80    0.66
  -1  -3  11    1.24    1.24
   1  -3 -11    0.88    0.44
   1   3 -11    1.19    0.55
   1  -3 -11    1.28    0.83
   1   3 -11    0.67    1.69
  -1   3  11    1.62    1.01
   1   3 -11    0.99    0.66
   1  -3 -11    0.99    0.48
   1   3 -11    1.24    1.04
 -13   0   2    0.40    1.54
  13   0  -2   -0.10    0.35
  13   0  -2    0.05    0.40
   0  -4  -9   12.39    0.98
   0   4  -9   12.35    1.14
   0  -4  -9   12.35    1.01
   0   4  -9   11.10    1.46
   0  -4   9   11.93    1.64
   0   4   9   12.31    1.37
   0   4  -9   13.14    2.33
  -1  -3 -11    0.19    0.40
  -1   3 -11    0.04    0.56
  -1   3 -11   -1.35    1.75
   1   3  11    0.60    0.90
  -1   3 -11    0.70    0.99
   1  -3  11    1.12    1.09
  -1   3 -11    0.48    0.48
   0  -1  13   91.93    4.01
   0  -1 -13   97.58    3.33
   0   1 -13   97.56    3.90
   0  -1  13   99.87    4.47
   0   1  13   94.02    4.22
   0   1 -13   96.60    3.37
   5   1 -12  483.36   14.57
  -5   1  12  511.11   16.45
  -5  -1  12  499.18   16.23
   5  -1 -12  497.09   14.64
   5   1 -12  505.30   15.33
   5  -1 -12  489.11   14.52
  13   0   2   -0.20    0.39
  13   0   2    0.44    0.37
 -13   0  -2    0.36    0.58
  11   3   0   40.65    2.02
  11  -3   0   41.23    3.13
  11  -3   0   42.59    1.97
  11  -3   0   42.59    1.99
 -11  -3   0   43.24    2.58
 -11  -3   0   39.77    3.24
  11   3   0   42.22    1.76
  -5   1 -12    6.72    2.56
  -5  -1 -12    6.34    2.80
  -5   1 -12    4.95    0.56
   5   1  12    4.81    1.81
  -5  -1 -12    4.73    0.61
  -5   1 -12    5.51    1.08
  -5   1 -12    4.98    0.78
  -2  -5   5    9.48    1.82
   2  -5  -5    8.91    0.93
   2   5  -5    8.43    1.63
   2   5  -5    9.89    1.57
   2  -5  -5    7.43    0.95
  -2   5  -5   72.79    4.74
   2   5   5   76.75    3.47
  -2   5  -5   78.39    3.79
   2  -5   5   77.66    3.09
   2   5   5   73.51    2.78
   2  -5   5   74.63    3.99
   2   5   5   74.29    3.12
   9   4   0    4.75    1.06
  -9  -4   0    5.44    1.91
   9  -4   0    5.03    0.79
   9  -4   0    0.35    0.83
   9  -4   0    4.32    0.87
  -9  -4   0    4.53    1.02
   9  -4   0    4.45    0.79
   9   4   0    4.60    0.65
   5  -5  -2   31.53    1.78
   5   5  -2   31.90    1.85
   5   5  -2   26.84    1.88
  -5  -5   2   35.22    3.21
   1   4  -9  117.30    4.90
   1  -4  -9  115.27    4.16
   1  -4  -9  118.54    4.27
   1   4  -9  112.22    4.27
   1   4  -9  113.23    5.52
  -1  -4   9  119.24    5.32
  -1   4   9  115.86    4.80
   5  -5   2   61.36    2.73
   5   5   2   60.00    2.66
   5   5   2   56.31    2.95
   5  -5   2   59.30    2.60
   1   4   9   46.20    2.26
  -1   4  -9   48.75    3.94
  -1  -4  -9   47.74    2.23
  -1   4  -9   47.02    2.81
   1  -4   9   47.63    2.96
   1  -4   9   51.68    2.29
   1   4   9   45.50    2.59
  -1   1  13    3.42    1.10
   1   1 -13    2.94    0.41
   1  -1 -13    3.36    0.50
  -1  -1  13    4.18    1.40
   1   1 -13    3.58    0.73
   1  -1  13    5.70    1.36
   1   1  13    5.85    1.32
  -1   1 -13    5.70    0.57
  -1  -1 -13    5.77    1.73
  -1  -1 -13    6.45    0.58
  -1   1 -13    5.37    0.89
  -1   1 -13    5.77    0.57
 -11  -3   1    9.84    2.20
  11   3  -1    9.39    0.93
  11   3  -1    9.79    0.74
  11  -3  -1   11.34    0.94
  11  -3  -1    9.83    0.93
  11  -3  -1    8.43    1.54
  11  -3   1    4.56    0.77
  11  -3   1    3.82    0.72
  11   3   1    4.27    0.67
 -11  -3  -1    4.25    1.01
  11   3   1    3.85    0.51
 -11  -3  -1    4.71    1.84
  11  -3   1    3.62    0.83
  11  -3   1    3.53    1.45
  -7   1  11   83.23    4.29
   7   1 -11   74.49    2.92
   7  -1 -11   84.32    2.97
   7   1 -11   82.39    3.14
  -7  -1  11   81.23    4.30
   7  -1 -11   77.46    2.77
  12  -1  -5    0.49    0.42
  12   1  -5    0.70    0.38
  12  -1  -5    0.50    0.40
  12   1  -5    0.58    0.41
 -12  -1   5   -0.04    1.67
 -12   1   5   -0.95    1.53
   3  -2 -12   58.25    5.58
   3   2 -12   55.30    5.33
   3   2 -12   52.28    2.33
   3   2 -12   52.75    1.88
  -3   2  12   58.47    6.04
   3  -2 -12   52.27    1.89
   9   4  -1    6.00    0.74
   9  -4  -1    5.85    0.82
   9   4  -1    6.27    1.23
  -9  -4   1    5.68    1.93
   9  -4  -1    7.24    0.98
  12  -1   5  409.04   38.09
  12  -1   5  419.28   38.75
 -12   1  -5  423.52   39.13
  12  -1   5  419.28   38.87
  12   1   5  421.76   38.97
 -12  -1  -5  419.51   39.10
   9  -4   1    3.70    0.75
  -9  -4  -1    2.12    0.87
   9  -4   1    6.37    1.48
   9  -4   1    3.17    0.76
   9   4   1    2.37    0.88
   9   4   1    2.32    0.60
   9  -4   1    7.56    1.02
  -9  -4  -1    7.07    2.02
  -3   2 -12  121.94   11.78
  -3  -2 -12  121.90   11.50
  -3   2 -12  115.29   10.91
  -3  -2 -12  108.87   10.93
  -3   2 -12  113.97   10.72
   3  -2  12  109.10   10.62
   3   2  12  112.11   10.86
  -3   2 -12  124.14   12.71
  13   1   0  128.44   11.98
 -13  -1   0  124.45   11.95
  13  -1   0  130.41   12.25
 -13   1   0  132.66   13.17
 -13  -1   0  129.17   12.85
  13  -1   0  123.19   11.50
  13   1   0  132.91   12.47
  -7   1 -11    2.76    0.40
  -7   1 -11    4.84    2.39
  -7   1 -11    2.57    0.92
  -7   1 -11    1.66    0.51
   7   1  11    6.66    1.19
  -7  -1 -11    3.91    2.24
   7  -1  11    6.21    1.23
  11  -1  -7   84.36    7.94
  11  -1  -7   89.54    8.43
  11   1  -7   81.82    7.70
 -11   1   7   82.55    8.54
  11   1  -7   86.61    8.24
 -11  -1   7   81.72    8.53
  11  -1   7    3.36    0.56
  11   1   7    6.62    1.17
  11  -1   7    6.87    1.16
 -11  -1  -7    3.65    0.89
 -11   1  -7    2.97    0.42
 -11  -1  -7    3.31    0.55
  11   1   7    2.78    0.42
  13   1  -1    0.45    0.42
 -13  -1   1    1.07    1.77
 -13   1   1    1.09    1.61
  13  -1  -1   -0.14    0.47
  13  -1  -1    0.40    0.40
  13   1  -1   -0.04    0.36
   2  -3 -11   88.96    8.51
   2   3 -11   96.11    9.71
  -2   3  11   97.15    9.54
  -2  -3  11   93.62    9.34
   2   3 -11   91.68    9.02
   2   3 -11  100.22    9.55
   2   3 -11   96.75    9.23
   2  -3 -11   94.09    8.94
   2  -3 -11   97.38    9.46
 -13  -1  -1   38.72    2.05
  13  -1   1   40.22    1.29
  13   1   1   41.73    1.24
 -13  -1  -1   39.52    3.07
  13   1   1   37.75    1.38
  13  -1   1   42.21    1.54
  -5  -3  10    5.75    1.68
  -5   3  10    6.32    1.44
   5  -3 -10    5.01    0.69
   5  -3 -10    6.32    1.02
   5   3 -10    4.79    0.65
   5  -3 -10    4.90    0.75
  12  -2  -3    4.44    0.63
  12   2  -3    4.17    0.61
 -12  -2   3    9.95    2.38
 -12   2   3    9.34    1.95
  12  -2  -3    7.84    1.53
  12   2  -3    5.19    0.57
   2  -3  11    2.07    1.02
  -2  -3 -11    0.29    0.46
  -2   3 -11    2.11    2.34
  -2   3 -11    0.49    0.47
   2   3  11    1.60    0.99
  -2   3 -11    0.63    0.95
   2  -3  11    0.39    0.48
   3   0 -13  154.84   14.42
  -3   0  13  161.34   15.48
   3   0 -13  168.14   15.69
  12  -2   3   72.44    6.97
 -12  -2  -3   75.99    7.54
  12  -2   3   74.33    7.34
  12  -2   3   79.15    7.51
  12   2   3   77.71    7.31
  -5  -3 -10    2.86    1.39
   5  -3  10    1.69    0.61
  -5   3 -10    2.35    0.50
   5   3  10    2.32    1.00
  -5   3 -10    1.43    2.15
   5  -3  10    2.04    1.12
  -5   3 -10    2.12    0.98
   3   0  13    2.78    1.32
  -3   0 -13    5.62    2.01
  -3   0 -13    2.60    0.51
   4   5  -4   24.22    1.91
   4  -5  -4   22.23    1.33
  -4  -5   4   23.66    2.62
   4  -5  -4   22.69    1.39
   4   5  -4   21.02    1.40
  10   3  -5   13.87    1.25
 -10   3   5   16.67    2.20
 -10  -3   5   15.30    2.27
  10  -3  -5   14.19    1.56
  10  -3  -5   15.65    1.05
  10  -3  -5   14.54    1.00
   4  -5   4   65.81    6.40
   4   5   4   66.97    6.53
   4   5   4   61.89    6.25
   4  -5   4   55.92    5.95
   4   5   4   62.76    6.25
  -4   5  -4   94.00   10.96
   2  -4  -9   10.96    0.94
   2  -4  -9   11.36    0.98
   2   4  -9   10.68    1.07
   2   4  -9    9.31    1.71
  -2  -4   9   10.18    1.70
   2  -4  -9   10.03    1.14
  -2  -1  13   24.40    2.02
   2  -1 -13   25.81    1.06
   2   1 -13   24.98    1.41
  -2   1  13   22.50    1.91
   2   1 -13   24.86    1.31
   2   1 -13   22.97    0.99
  -2   4  -9   61.24    6.99
  -2  -4  -9   61.65    6.01
   2  -4   9   55.73    5.80
   2   4   9   53.40    2.39
  -2   4  -9   55.04    5.69
   2  -4   9   60.18    5.85
  11   3  -2   46.33    1.45
  11  -3  -2   44.95    2.71
 -11  -3   2   43.55    3.30
  11  -3  -2   45.23    1.67
 -11   3   2   44.20    2.90
  11   3  -2   42.88    1.82
   6  -4  -7   26.39    1.38
   6   4  -7   27.46    1.93
   6  -4  -7   26.18    1.40
  -6  -4   7   24.59    2.52
   6   4  -7   24.73    1.31
   6  -4  -7   22.66    1.55
  10   3   5   44.83    1.39
  10  -3   5   41.60    1.69
  10  -3   5   38.78    2.89
  10  -3   5   36.15    1.97
  10  -3   5   42.20    1.67
  -2   1 -13   39.72    1.23
  -2   1 -13   42.12    2.03
   2   1  13   41.26    2.28
   2  -1  13   40.98    2.40
  -2  -1 -13   44.39    1.38
  -2  -1 -13   38.96    2.91
  -2   1 -13   42.54    1.54
  -7  -4   6    0.47    1.63
   7  -4  -6    0.45    0.62
   7  -4  -6   -0.19    0.48
  -7  -4   6    1.69    1.63
   7  -4  -6    0.34    0.59
   7   4  -6    0.45    1.05
   7   4  -6    0.33    0.58
 -11  -3  -2   34.79    2.08
  11  -3   2   35.51    1.56
  11  -3   2   33.39    1.45
  11   3   2   31.42    1.40
 -11  -3  -2   36.49    2.91
  11  -3   2   38.22    2.91
  11   3   2   36.03    1.25
  11  -3   2   34.70    1.89
  -6   4  -7    9.48    1.35
   6   4   7   11.82    1.33
   6  -4   7   10.01    1.38
   6   4   7    8.99    0.76
   6  -4   7   10.59    0.97
  -6   4  -7   16.21    3.98
   7  -4   6    3.68    0.79
   7   4   6    3.24    0.93
   7  -4   6    3.70    1.03
  -7  -4  -6    4.38    1.61
   7   4   6    2.55    0.55
   9  -4  -2   28.47    1.44
  -9  -4   2   24.39    2.07
   9   4  -2   28.38    1.28
  -9  -4   2   29.48    3.01
   9   4  -2   28.80    1.93
   9  -4  -2   24.01    1.58
  13   0  -3   24.82    1.06
 -13   0   3   30.05    2.81
  13   0  -3   27.35    1.02
   9  -4   2    5.82    0.96
   9   4   2    6.90    1.14
  -9  -4  -2    6.41    1.92
   9  -4   2    7.44    0.93
   9   4   2    6.74    0.69
   9  -4   2    7.86    1.64
   9  -4   2    6.95    0.84
  13   0   3  268.10   24.91
  13   0   3  242.12   22.42
 -13   0  -3  245.87   22.97
  -6   0  12  222.24   21.15
   6   0 -12  227.79   21.16
   6   0 -12  220.85   20.63
   3  -5  -5   22.96    1.34
   3   5  -5   26.14    1.90
  -3  -5   5   21.70    2.46
   3  -5  -5   22.13    1.41
   6   2 -11   14.90    1.29
   6   2 -11   12.15    0.93
   6   2 -11   12.15    0.78
   6  -2 -11   13.80    0.97
   6  -2 -11   12.39    0.82
  -6   2  11   21.38    1.99
  -6  -2  11   18.98    1.95
 -13   1   2   65.03    7.03
  13   1  -2   66.13    6.28
  13  -1  -2   63.50    6.02
 -13  -1   2   62.57    6.80
  13   1  -2   57.55    5.48
  13  -1  -2   60.96    5.84
   3   5   5    0.88    0.72
  -3   5  -5    1.25    2.18
   3  -5   5    1.61    1.10
   3  -5   5    0.48    0.67
   3   5   5    0.09    0.61
  -6   0 -12   57.89    5.60
  -6   0 -12   52.10    4.06
   6   0  12   55.63    5.71
  -6   0 -12   59.65    5.77
   5  -5  -3   18.26    1.30
   5  -5  -3   15.56    1.12
   5   5  -3   16.00    1.63
   5   5  -3   18.92    1.29
  -5  -5   3   15.35    2.33
  13   1   2    0.32    0.41
 -13  -1  -2    1.96    1.64
  13  -1   2    0.66    0.40
  13   1   2    0.46    0.37
 -13  -1  -2    0.62    0.83
  13  -1   2    0.80    0.49
   5  -5   3    3.60    0.84
   5  -5   3    3.49    1.17
   5  -5   3    3.32    1.33
   5   5   3    2.85    0.93
   5   5   3    3.05    0.67
  -6   2 -11   12.57    1.39
  -6  -2 -11   13.07    2.37
   6  -2  11   13.35    1.11
   6   2  11   15.05    1.57
   6  -2  11   13.37    1.64
  -6   2 -11   11.91    3.14
  -6   2 -11   12.21    1.05
  -6   2 -11   12.21    0.79
   8  -3  -8   31.05    1.98
   8  -3  -8   27.17    1.31
   8   3  -8   28.64    1.21
   8  -3  -8   27.68    1.26
   8   3  -8   30.61    1.85
  -8  -3   8   28.70    2.69
  -8   3   8   30.54    2.46
  12   0  -6   25.64    1.12
 -12   0   6   26.25    2.60
  12   0  -6   26.22    1.01
  11  -2  -6   41.93    1.47
  11   2  -6   42.65    1.65
  11  -2  -6   37.26    2.37
 -11   2   6   42.39    3.06
  11  -2  -6   39.12    1.36
 -11  -2   6   43.64    3.26
  11   2  -6   42.90    1.37
  -9   0  10   -0.30    1.45
   9   0 -10    0.03    0.32
   8   3   8   51.45    2.41
   8  -3   8   49.40    2.36
  -8   3  -8   52.52    2.52
  -8  -3  -8   45.46    3.71
   8   3   8   56.43    5.38
   8  -3   8   51.91    1.88
  10   0  -9    0.13    0.42
 -10   0   9   -0.60    1.74
  10   0  -9    0.02    0.35
 -12   0  -6  150.34   14.14
  12   0   6  142.85   13.31
  12   0   6  135.79   12.96
  11   2   6  201.27   18.71
  11  -2   6  186.43   17.63
 -11  -2  -6  187.84   17.82
  11  -2   6  199.44   18.64
 -11   2  -6  202.41   18.82
  11   2   6  194.34   18.34
  11  -2   6  205.49   19.17
  -9   0 -10   -2.68    3.46
  -9   0 -10   -0.07    0.26
 -10   0  -9   -0.04    0.67
  10   0   9    0.24    0.35
 -10   0  -9   -0.23    0.40
 -10   0  -9   -0.09    0.27
   0  -5  -6    2.68    0.70
   0  -5   6    2.88    0.73
   0   5  -6    2.01    1.45
   0   5  -6    2.18    1.21
   0  -5   6    2.99    1.34
   0  -5  -6    3.18    0.74
   3   3 -11   14.83    1.58
   3   3 -11   14.83    1.02
   3  -3 -11   14.47    1.35
   3   3 -11   14.70    1.07
   3  -3 -11   14.88    0.97
  -3  -3  11   17.87    1.99
  -3   3  11   17.20    1.69
   3  -3 -11   16.31    1.17
   5   4  -8   62.71    6.11
   5  -4  -8   63.78    6.20
   5  -4  -8   64.03    6.19
   5   4  -8   66.90    6.76
   5  -4  -8   52.26    2.32
  -5  -4   8   63.26    6.75
   6   5   0   38.07    1.71
   6   5   0   37.74    2.21
   6  -5   0   41.42    1.78
  -6  -5   0   40.13    3.02
  -3  -3 -11   54.43    1.87
   3  -3  11   56.66    5.85
  -3   3 -11   55.47    5.38
   3   3  11   57.61    5.84
   3  -3  11   60.10    5.83
  -3   3 -11   66.93    7.59
  -3   3 -11   58.74    6.01
   7  -3  -9   45.94    1.74
   7   3  -9   49.10    2.34
   7  -3  -9   44.08    2.26
  -7   3   9   48.16    2.84
   7  -3  -9   47.28    1.62
   7   3  -9   48.54    1.61
  -7  -3   9   44.18    3.03
  -5   4  -8   11.11    1.53
   5  -4   8    9.82    1.43
   5   4   8   10.04    0.85
   5  -4   8   12.06    1.06
  -5   4  -8    7.22    2.51
   5   4   8    9.80    1.23
   8  -4  -5   10.19    0.99
  -8  -4   5    9.84    2.14
   8   4  -5    9.90    1.45
  -8  -4   5   11.52    1.89
  -9   3   7   19.15    2.13
   9   3  -7   21.64    1.51
   9  -3  -7   19.08    1.13
   9   3  -7   18.28    0.98
  -9  -3   7   19.30    2.41
   9  -3  -7   19.83    1.70
   4   2 -12  232.19   21.80
   4   2 -12  229.48   21.40
   4  -2 -12  241.33   22.41
   4  -2 -12  236.30   22.07
   4   2 -12  248.60   23.09
  -4   2  12  236.60   22.39
  -1  -5   6   21.53    2.29
   1  -5  -6   21.31    1.29
   1   5  -6   18.37    1.31
   1   5  -6   20.31    2.19
   1   5  -6   21.90    1.89
   1  -5  -6   20.11    1.22
   7  -3   9    3.54    0.70
   7   3   9    3.46    1.02
  -7   3  -9    3.93    1.13
  -7   3  -9    3.57    4.18
   7  -3   9    3.81    1.04
  -7  -3  -9    3.65    1.84
  -1  -5  -6    0.86    0.59
   1  -5   6    0.82    0.60
  -1   5  -6    1.42    1.97
  -1   5  -6    0.40    1.08
  -1  -5  -6    1.18    0.60
   1  -5   6    2.58    1.15
   8  -4   5    1.22    0.72
   8  -4   5    1.25    0.70
  -8  -4  -5    2.86    2.16
   8  -4   5    3.81    0.99
   8   4   5    0.87    0.42
   8  -4   5    3.13    1.37
   3  -4  -9   24.04    1.63
   3   4  -9   25.30    1.43
   3  -4  -9   24.99    1.31
  -3  -4   9   25.14    2.31
   3  -4  -9   27.94    1.55
   4   2  12   11.56    1.43
  -4   2 -12   11.76    0.74
   4  -2  12   10.36    1.53
  -4   2 -12   12.71    3.08
  -4   2 -12   13.67    1.47
  -4  -2 -12   13.18    2.14
  -4  -2 -12   11.51    0.91
  -4   2 -12   12.43    0.98
   3   1 -13   29.39    1.47
   3  -1 -13   35.32    1.26
   3   1 -13   28.16    1.33
  -3   1  13   34.36    2.24
   3   1 -13   27.76    1.07
   3  -1 -13   30.33    1.43
  -3  -1  13   39.52    2.51
   9  -3   7    4.89    1.10
   9   3   7    4.86    1.07
   9  -3   7    2.98    0.72
  -9  -3  -7    3.20    0.73
   9   3   7    3.51    0.44
   6  -5  -1   38.71    1.70
   6   5  -1   34.20    2.05
   6   5  -1   37.17    1.67
  -6  -5   1   33.21    2.95
   6  -5   1   24.32    1.39
  -6  -5  -1   22.18    2.46
   6   5   1   22.81    1.72
   6  -5   1   23.19    1.36
   6   5   1   21.60    1.35
  11  -3  -3   32.64    1.41
  11   3  -3   32.61    1.22
  11  -3  -3   32.97    2.32
 -11  -3   3   33.23    3.06
  11   3  -3   35.59    1.69
  11  -3  -3   29.27    1.34
  -3   4  -9   19.35    1.77
   3  -4   9   19.48    1.18
  -3   4  -9   20.31    2.97
   3  -4   9   20.82    1.79
   3   4   9   19.49    1.54
  -3  -4  -9   19.05    1.20
  -3   1 -13  249.75   23.29
  -3   1 -13  222.77   21.63
  -3  -1 -13  243.22   23.35
  -3   1 -13  241.82   22.43
  -3   1 -13  235.08   22.09
   3   1  13  245.10   23.08
  -3  -1 -13  245.50   22.82
  11  -3   3   51.73    3.44
  11  -3   3   49.71    2.30
  11  -3   3   56.03    5.46
  11  -3   3   53.07    1.90
  11   3   3   56.35    5.38
 -11  -3  -3   53.57    2.48
   9   4  -3  100.62    9.80
  -9  -4   3   86.53    8.78
   9  -4  -3   89.75    8.55
  -9  -4   3   92.40    9.61
   9  -4  -3   92.16    8.79
   9   4  -3   96.06    9.09
   9   4   3    2.55    0.54
   9  -4   3    2.48    0.75
   9  -4   3    2.64    1.41
   9  -4   3    2.80    0.83
   9   4   3    2.38    0.76
   9  -4   3    2.15    0.72
  12   2  -4    0.98    0.47
 -12  -2   4    1.49    2.03
  12  -2  -4    0.91    0.51
  12  -2  -4    0.49    0.54
 -12   2   4    1.04    1.57
  12  -2  -4    1.36    1.18
  -4   0  13   -0.68    1.28
   4   0 -13   -0.05    0.43
   4   0 -13   -0.12    0.25
  12  -2   4   60.90    5.85
  12   2   4   56.63    5.38
  12  -2   4   62.28    6.25
  12  -2   4   52.42    1.85
 -12  -2  -4   57.97    5.90
  -8   0  11   -1.22    1.42
   8   0 -11   -0.09    0.33
   8   0 -11   -0.16    0.43
  -4   0 -13    0.56    1.97
   4   0  13    0.51    0.99
  -4   0 -13   -0.04    0.34
 -13   1   3  120.03   12.04
 -13  -1   3  119.25   11.99
  13  -1  -3  108.07   10.16
  13   1  -3  109.67   10.28
  13   1  -3   85.33    8.10
  13  -1   3  103.00    9.66
  13   1   3  100.45    9.41
  13  -1   3  103.44    9.79
 -13   1  -3  103.17    9.69
 -13  -1  -3  106.71   10.34
  11   0  -8   -0.22    0.43
  11   0  -8   -0.23    0.43
 -11   0   8    0.72    1.48
  -6   1  12  112.84   11.12
   6   1 -12  106.28   10.07
   6   1 -12  110.20   10.35
   6  -1 -12  103.40    9.71
  -6  -1  12  114.82   11.30
   6  -1 -12  113.93   10.68
   9  -2  -9   17.05    0.99
   9   2  -9   15.48    0.83
  -9   2   9   14.26    2.00
   9  -2  -9   14.40    0.90
  -9  -2   9   15.90    2.36
   9   2  -9   14.06    1.04
  -8   0 -11    0.03    0.32
   8   0  11   -0.48    0.96
  -8   0 -11   -2.63    2.81
   2   5  -6   79.21    8.08
   2  -5  -6   84.46    8.10
  -2  -5   6   79.62    8.23
   2   5  -6   84.86    8.19
   2  -5  -6   83.36    8.01
   2   5  -6   87.63    8.67
  -6  -1 -12    9.36    2.50
   6   1  12   10.55    1.47
  -6   1 -12   12.15    1.37
   6  -1  12    8.92    1.41
  -6   1 -12    9.41    0.83
  -6   1 -12   11.62    2.78
  -6   1 -12   10.75    0.63
   2   5   6    0.10    0.61
   2  -5   6    0.21    1.10
   2  -5   6    0.23    0.58
  -2   5  -6    0.15    1.82
   9   2   9    1.52    0.99
   9  -2   9    0.82    0.54
  -9   2  -9    0.60    0.29
  -9  -2  -9    1.23    0.63
  -9   2  -9    1.27    1.00
  -9  -2  -9    2.48    3.60
   9  -2   9    1.35    0.92
  -9   2  -9    0.59    0.38
 -13   0   4   -1.45    1.75
  13   0  -4   -0.06    0.40
 -11   0  -8   -0.10    0.29
  11   0   8    0.12    0.33
  11   0   8    0.50    0.91
  -6  -5   2    7.69    2.43
   6   5  -2    6.17    0.91
   6   5  -2    5.75    1.19
   6  -5  -2    5.67    0.77
  -6  -5   2    4.60    1.80
   6   5   2   15.86    1.49
   6  -5   2   17.34    1.24
   6   5   2   16.07    1.16
   6  -5   2   16.29    1.15
 -13   0  -4   -0.10    0.52
  13   0   4    0.17    0.32
  12   1  -6    0.23    0.46
  12   1  -6    0.25    0.39
 -12  -1   6   -0.59    1.76
  12  -1  -6    0.10    0.35
  12  -1  -6    0.37    0.47
 -12   1   6    0.86    1.63
   9   1 -10   61.09    5.80
   9  -1 -10   61.41    5.85
  -9   1  10   69.71    7.28
   9   1 -10   74.68    7.14
   9  -1 -10   71.96    6.80
  -9  -1  10   69.59    7.35
   4  -5  -5   31.60    1.50
   4   5  -5   33.62    2.15
  -4  -5   5   38.94    3.02
   4  -5  -5   35.71    1.77
  10   1  -9   57.79    5.50
 -10  -1   9   61.56    6.65
  10  -1  -9   58.39    5.56
 -10   1   9   55.11    5.99
  10   1  -9   57.58    5.60
  -5  -5   4   64.05    8.11
   5   5  -4   48.45    2.47
   5  -5  -4   47.74    1.95
  -5  -5   4   47.83    3.36
   5  -5  -4   44.03    1.79
   5   5  -4   49.23    1.99
  12   1   6   75.19    7.08
  12  -1   6   70.04    6.94
  12   1   6   73.10    7.23
 -12   1  -6   73.66    6.96
  12  -1   6   72.08    6.84
  -4   5  -5    7.68    2.67
   4   5   5    6.60    1.19
   4   5   5    6.84    0.89
   4  -5   5    8.34    1.30
   4  -5   5    5.70    0.82
   8   2 -10   68.40    6.66
   8  -2 -10   63.06    6.05
  -8   2  10   66.25    6.90
   8   2 -10   66.13    6.29
  -8  -2  10   65.99    6.99
   8  -2 -10   64.09    6.12
   5   5   4   81.01    7.93
   5  -5   4   79.61    8.01
   5  -5   4   95.32    9.15
   5   5   4   90.37    8.65
   5   5   4   87.00    8.56
  -9  -1 -10   66.91    6.46
  -9  -1 -10  100.29   11.78
  -9   1 -10   65.23    6.59
   9  -1  10   56.17    5.66
   9  -1  10   62.12    6.02
  -9   1 -10   64.84    6.13
   9   1  10   66.66    6.66
  -9   1 -10   66.08    6.30
  10  -2  -8   68.88    6.57
 -10  -2   8   91.59    9.40
 -10   2   8   88.68    9.07
  10   2  -8   73.93    7.13
  10   2  -8   75.11    7.10
  10   1   9   63.33    6.34
  10  -1   9   62.60    6.03
  10   1   9   58.68    5.62
 -10   1  -9   66.81    6.75
 -10   1  -9   64.25    6.12
 -10   1  -9   64.47    6.10
  10  -1   9   58.58    5.91
 -10  -1  -9   59.13    5.71
  -8   2 -10  425.65   39.30
   8  -2  10  390.19   36.17
  -8   2 -10  433.86    7.09
   8   2  10  391.87   36.51
  -8  -2 -10  373.12   35.72
  -8  -2 -10  418.62   38.88
   8  -2  10  390.40   36.41
  -8   2 -10  411.28   38.09
 -10   2  -8    2.51    0.46
 -10  -2  -8    6.84    0.82
  10  -2   8    6.15    1.13
  10   2   8   12.91    1.42
  10   2   8    8.47    0.64
   6   3 -10    2.45    0.53
   6  -3 -10    3.22    0.72
   6  -3 -10    3.71    0.99
  -6   3  10    3.86    1.40
   6  -3 -10    2.51    0.59
  -6  -3  10    3.49    1.63
  -6   3 -10  119.78   12.50
  -6   3 -10  125.22   11.72
   6   3  10  124.13   11.91
  -6  -3 -10  135.32   13.52
  -6   3 -10  138.81   13.38
   6  -3  10  120.79   11.67
   6  -3  10  148.87   14.05
  10  -3  -6   24.31    1.89
 -10  -3   6   25.02    2.76
  10  -3  -6   22.19    1.16
  10   3  -6   20.57    0.99
  10  -3  -6   19.39    1.12
  10   3  -6   19.90    1.44
   4  -3 -11   22.07    1.34
   4   3 -11   22.10    1.21
   4   3 -11   23.41    1.87
   4  -3 -11   25.05    1.71
  -4   3  11   25.37    2.13
   4  -3 -11   21.65    1.14
  -4  -3  11   25.65    2.30
  10  -3   6   31.07    1.88
  10  -3   6   35.92    1.55
  10  -3   6   34.32    2.71
  10   3   6   37.06    1.22
  10   3   6   32.75    1.96
  10  -3   6   33.79    1.55
   4  -3  11   65.08    6.64
  -4   3 -11   68.83    6.94
  -4   3 -11   63.79    6.14
   4  -3  11   64.48    6.24
  -4   3 -11   66.63    7.59
   4   3  11   70.10    6.97
  -4  -4   9   29.03    2.49
   4   4  -9   30.91    1.57
   4  -4  -9   29.83    1.80
   4  -4  -9   28.57    1.40
   4   4  -9   29.50    2.07
   4  -4  -9   32.30    1.57
   4   1 -13  146.77   13.79
   4  -1 -13  151.78   14.24
   4   1 -13  145.61   13.68
  -4   1  13  161.21   15.47
  -4  -1  13  155.55   14.96
   4   1 -13  147.62   13.89
   4  -1 -13  161.10   15.01
  11   3  -4  161.66   15.07
  11  -3  -4  159.92   14.97
  11  -3  -4  158.55   15.25
  11   3  -4  178.55   16.78
 -11  -3   4  157.63   15.61
  11  -3  -4  168.17   15.73
  -4   4  -9    8.35    1.43
  -4   4  -9    8.58    2.55
   4  -4   9    8.68    1.33
   4  -4   9    9.27    0.93
   4   4   9   10.56    1.27
  11  -3   4  124.71   11.78
  11  -3   4  104.17   10.07
  11  -3   4  122.15   11.52
  11  -3   4  117.85   11.81
 -11  -3  -4  116.19   11.23
  11   3   4  123.64   11.55
   8   1 -11   64.09    6.08
   8  -1 -11   66.61    6.32
   8  -1 -11   67.16    6.37
  -8   1  11   64.08    6.69
  -8  -1  11   67.75    7.09
  -4   1 -13   68.49    6.80
  -4   1 -13   66.26    7.41
  -4  -1 -13   68.74    7.48
  -4  -1 -13   67.82    6.45
   4   1  13   58.79    5.98
  -4   1 -13   64.01    6.22
  -4   1 -13   65.23    6.37
  -9  -4   4   15.24    2.48
   9   4  -4   17.47    1.61
   9  -4  -4   16.66    1.14
  -9  -4   4   13.94    1.87
   9   4  -4   16.92    0.97
   9  -4  -4   18.40    1.18
   3   5  -6   54.62    2.58
   3  -5  -6   53.41    1.96
  -3  -5   6   53.60    3.23
   3   5  -6   48.99    2.03
   3  -5  -6   54.83    1.97
   3   5   6   50.32    2.35
   3  -5   6   48.62    1.84
   3  -5   6   49.02    2.74
  -3   5  -6   48.25    3.71
   3   5   6   50.33    1.97
   9  -4   4    1.24    0.66
   9  -4   4    1.54    1.32
   9  -4   4    1.02    0.68
   9  -4   4    2.31    0.84
   9   4   4    0.83    0.44
  -6  -5   3   15.19    2.34
   6   5  -3   14.04    1.60
  -6  -5   3   15.14    2.63
   6   5  -3   13.79    1.10
   6  -5  -3   13.29    1.13
  11   1  -8  109.60   10.27
  11   1  -8  123.23   11.74
  11  -1  -8  118.29   11.07
 -11  -1   8  131.71   13.03
 -11   1   8  125.95   12.48
  11  -1  -8  125.58   11.74
  -8  -1 -11  250.67   23.40
  -8   1 -11  224.90   20.94
  -8  -1 -11  231.29   22.68
  -8   1 -11  262.51   25.99
   8  -1  11  219.36   20.69
  -8   1 -11  240.70   22.68
  -8   1 -11  210.76   19.56
   8   1  11  241.90   22.72
   6  -5   3   55.38    5.44
   6   5   3   54.28    1.87
   6   5   3   52.89    2.43
   6  -5   3   56.45    5.56
   6  -5   3   54.26    2.71
   7  -4  -7    0.53    0.65
   7   4  -7   -0.20    0.52
  -7  -4   7    0.49    1.71
   7   4  -7   -0.35    1.15
   7  -4  -7    0.07    0.57
   7  -4  -7   -0.11    0.65
   0   2  13  117.54   11.38
   0  -2 -13  121.97   11.45
   0   2 -13  113.31   11.39
   0   2 -13  115.56   10.92
   0   2 -13  111.96   10.60
   0   2 -13  124.68   12.00
   0  -2  13  108.60   10.64
   7  -4   7    7.30    1.17
   7  -4   7    8.45    1.01
   7   4   7    7.36    0.68
  -7   4  -7    7.80    1.19
   7   4   7    8.12    1.19
  -7  -4  -7    7.84    1.69
   5  -2 -12    1.25    0.53
   5   2 -12    1.00    0.39
   5   2 -12    1.59    0.59
  -5   2  12    0.43    1.09
   5   2 -12    1.74    0.86
   5  -2 -12    1.09    0.46
 -13  -1   4   94.40    9.73
 -13   1   4   92.67    9.51
  13   1  -4   93.13    8.81
  13  -1  -4   90.86    8.57
  11   1   8   98.89    9.61
  11  -1   8   92.64    8.78
  11   1   8   94.37    8.84
  11  -1   8   89.47    8.74
 -11  -1  -8   94.29    8.94
 -11   1  -8   95.85    9.02
  13  -1   4  154.63   14.52
 -13   1  -4  150.59   14.05
 -13  -1  -4  149.31   14.26
  13   1   4  152.58   14.19
  13  -1   4  140.82   13.45
  13  -1   4  145.96   13.61
   5   2  12   35.38    2.07
   5  -2  12   31.14    2.07
  -5   2 -12   33.35    1.49
  -5   2 -12   33.08    3.63
  -5   2 -12   34.01    1.15
  -5  -2 -12   36.93    3.15
  -5   2 -12   34.16    2.04
   7   0 -12   -0.14    0.34
   7   0 -12    0.11    0.45
  -7   0  12    0.33    1.38
   1   2 -13   17.12    1.07
   1   2 -13   19.53    1.07
   1   2 -13   23.45    2.57
  -1   2  13   22.19    1.89
   1  -2 -13   20.10    1.03
   1   2 -13   18.65    1.59
  -1   2 -13  137.60   13.21
  -1  -2 -13  130.36   12.23
  -1   2 -13  144.16   14.32
  -1   2 -13  129.20   12.17
  -1   2 -13  127.83   12.08
   1   2  13  131.67   12.68
   1  -2  13  123.65   11.99
   7  -2 -11   52.71    1.75
   7   2 -11   50.95    1.81
  -7   2  11   52.32    3.09
  -7  -2  11   56.37    3.46
   7  -2 -11   44.62    1.68
   0  -4  10   66.20    3.43
   0   4 -10   63.18    3.08
   0  -4 -10   66.30    2.48
   0   4  10   66.57    3.05
   0   4 -10   64.63    2.63
   0   4 -10   69.43    4.10
   0  -4 -10   64.82    2.47
 -12   2   5    5.29    2.00
 -12  -2   5    4.51    2.11
  12  -2  -5    4.68    0.64
  12   2  -5    3.31    0.61
  12  -2  -5    4.07    0.57
  -7   0 -12    0.03    0.31
  -7   0 -12    2.22    2.43
   7   0  12   -0.39    0.93
   6  -4  -8   37.39    1.57
  -6  -4   8   39.03    2.83
   6  -4  -8   40.40    2.00
   6   4  -8   43.00    2.49
   6   4  -8   35.99    1.48
   6  -4  -8   38.28    1.50
   5   0 -13    5.08    0.63
   5   0 -13    4.77    0.47
  -5   0  13   10.00    1.77
 -12  -2  -5   20.12    1.59
  12  -2   5   19.02    1.13
  12   2   5   21.80    0.86
  12  -2   5   19.40    1.51
  12  -2   5   20.75    1.08
 -12   0   7   -0.99    1.77
  12   0  -7    0.10    0.38
  12   0  -7    0.28    0.44
   8  -4  -6    2.14    0.68
   8  -4  -6    2.79    0.69
  -8  -4   6    3.47    1.70
   8   4  -6    2.53    1.14
   8   4  -6    2.83    0.64
   8  -4  -6    2.62    0.79
  13   2   0   19.80    0.94
  13  -2   0   20.91    1.13
  13   2   0   19.56    0.85
  13  -2   0   21.18    1.03
 -13  -2   0   24.88    2.93
   7   2  11  108.39    3.98
  -7  -2 -11  111.39    5.94
  -7   2 -11  113.60    3.11
   7  -2  11  100.48    3.94
  -7   2 -11  107.99    3.40
  -7   2 -11  105.58    6.19
  -7   2 -11  110.23    4.26
  -6   4  -8   -0.95    2.88
   6   4   8    1.72    1.03
   6   4   8    1.11    0.44
   6  -4   8    1.36    0.70
   6  -4   8    1.17    1.02
  -6   4  -8    1.68    1.05
  11  -2  -7   24.06    1.09
  11   2  -7   24.00    1.25
 -11   2   7   27.40    2.53
  11   2  -7   21.39    0.93
  11  -2  -7   24.48    1.06
 -11  -2   7   28.77    2.72
  -5   0 -13   55.19    4.19
  -5   0 -13   53.70    1.97
   5   0  13   51.63    2.74
   8  -4   6   70.48    3.84
   8  -4   6   75.61    3.29
   8   4   6   80.20    3.28
   8  -4   6   75.67    2.71
   8   4   6   78.75    2.55
  -8  -4  -6   64.44    4.28
   1  -4 -10   13.73    1.07
   1  -4 -10   12.83    0.99
   1  -4 -10   11.68    1.17
   1   4 -10   14.29    2.04
  -1  -4  10   14.42    1.86
   1   4 -10   14.30    1.63
   1   4 -10   14.30    1.16
  -1   4 -10  143.50    5.11
   1  -4  10  147.29    5.41
  -1   4 -10  151.98    6.58
  -1  -4 -10  142.69    4.30
   1   4  10  140.24    4.84
  10  -4   0   14.95    1.14
  10   4   0   12.90    1.30
  10   4   0   14.53    0.90
  10  -4   0   14.67    1.74
 -10  -4   0   14.64    2.40
  10  -4   0   15.36    1.31
  10  -4   0   14.24    1.12
  12   0   7   -0.22    0.94
 -12   0  -7   -0.04    0.44
  12   0   7    0.19    0.35
  11  -2   7   56.04    2.68
  11   2   7   57.08    2.70
 -11   2  -7   51.86    1.81
  11  -2   7   55.46    2.20
  11  -2   7   53.90    2.09
  11   2   7   53.02    1.80
 -13   2   1  159.88    6.32
  13  -2  -1  153.06    4.18
  13   2  -1  130.32    5.43
  13  -2  -1  158.12    4.46
  13   2  -1  161.48    4.27
 -13  -2   1  162.99    6.65
  13  -2   1   96.09    3.10
  13   2   1   99.20    2.83
  13  -2   1  100.99    3.02
 -13  -2  -1   96.47    4.95
 -13  -2  -1   93.15    3.69
  13   2   1   78.63    2.60
   0  -5   7   92.34    3.08
   0  -5  -7   90.37    3.07
   0   5  -7   91.78    4.80
   0  -5  -7   87.79    3.05
   0  -5   7   89.58    4.19
  13   0  -5   62.56    1.98
 -13   0   5   61.96    3.91
  13   0  -5   61.22    2.14
  10  -4  -1  110.63    3.53
  10   4  -1  105.55    3.17
  10  -4  -1  101.17    3.76
 -10  -4   1  103.36    5.18
  10   4  -1   99.89    3.76
 -10  -4  -1   21.29    2.55
  10  -4   1   22.29    1.27
  10   4   1   21.39    1.06
  10   4   1   22.60    1.54
  10  -4   1   24.14    1.32
  10  -4   1   22.56    1.58
  10  -4   1   20.01    2.06
 -10  -4  -1   21.82    1.67
   0   0 -14   39.02    1.36
   0   0  14   36.31    2.21
   7  -5   0    2.52    0.81
   7   5   0    2.21    0.73
   7   5   0    2.11    1.06
   7  -5   0    2.99    0.83
  -7  -5   0    4.91    1.73
  13   0   5  107.12    2.98
 -13   0  -5  107.36    3.51
  13   0   5   93.74    3.62
  -2   2  13  150.85    5.31
   2  -2 -13  154.41    4.24
   2   2 -13  152.56    4.30
   2   2 -13  137.37    4.63
   2  -2 -13  136.49    4.13
   2   2 -13  135.92    4.11
  -1  -5   7   17.18    1.96
   1   5  -7   17.68    1.73
   1  -5  -7   14.24    1.07
   1  -5  -7   14.83    1.11
   1   5  -7   15.18    1.21
   1   5  -7   16.62    2.09
  -1  -5  -7    8.63    0.90
  -1   5  -7   10.01    2.29
   1  -5   7    7.58    0.90
  -1  -5  -7    8.42    0.90
   1  -5   7    6.66    1.49
   2  -2  13   10.45    1.52
  -2   2 -13    9.10    1.26
  -2  -2 -13    8.84    0.77
  -2   2 -13   12.74    2.64
  -2   2 -13    8.88    0.91
  -2   2 -13    8.20    0.72
   2   2  13   10.36    1.42
  -5  -5   5    2.62    2.74
   5   5  -5    2.96    1.25
   5  -5  -5    2.56    0.73
   5  -5  -5    3.03    0.74
  -5  -5   5    2.78    1.67
   0  -3  12  119.49    4.65
   0   3 -12  128.82    5.72
   0   3 -12  125.99    4.05
   0   3 -12  112.09    3.48
   0   3  12  125.53    4.61
   0   3 -12  126.41    4.62
   0  -3 -12  121.04    3.67
   5   5   5    0.62    0.81
  -5   5  -5    0.70    3.41
  -5   5  -5    1.04    0.98
   5  -5   5    0.83    0.95
   5   5   5    0.58    0.67
   5   5   5    0.84    0.61
   5  -5   5    1.37    0.76
  -1   0  14    0.37    1.06
   1   0 -14   -0.03    0.44
   7  -5  -1   29.77    1.46
   7   5  -1   26.85    1.89
  -7  -5   1   28.47    2.73
   7   5  -1   27.65    1.39
   7   5   1    6.53    0.87
   7  -5   1    6.26    0.91
   7  -5   1    5.48    0.78
  -7  -5  -1    8.60    1.83
   7   5   1    6.37    1.15
  -1   0 -14   -0.94    1.46
   1   0  14    0.06    1.06
  -1   0 -14   -0.12    0.38
  -1  -3  12    9.12    1.61
   1  -3 -12    9.52    0.81
   1   3 -12    9.95    2.00
   1   3 -12    8.87    1.35
   1   3 -12    9.48    0.94
  -1   3  12    9.39    1.41
   1  -3 -12    9.10    0.79
   1   3 -12    9.11    0.84
   2  -4 -10   65.79    2.49
   2   4 -10   68.78    3.78
   2   4 -10   71.40    2.76
   2  -4 -10   62.49    2.79
   2  -4 -10   72.39    2.61
   2   4 -10   66.69    3.16
  -2  -4  10   68.87    3.57
  -1  -3 -12   12.23    0.97
   1  -3  12   17.43    1.72
   1   3  12   13.34    1.79
  -1   3 -12   19.27    2.72
  -1   3 -12   14.36    1.53
  -1   3 -12   14.34    1.18
  -1   3 -12   12.14    0.97
  -2   4 -10  103.24    4.11
   2  -4  10  100.18    4.14
   2   4  10  104.82    3.96
  -2   4 -10  115.03    5.82
  -2  -4 -10  105.49    3.49
   2  -4  10  109.66    3.47
  14   0   0    5.70    0.57
 -14   0   0    6.20    1.93
  14   0   0    5.35    0.66
   8  -3  -9   45.27    2.50
  -8  -3   9   39.60    2.88
   8  -3  -9   40.38    1.43
   8  -3  -9   43.26    1.86
  -8   3   9   39.64    2.76
   8   3  -9   41.85    1.97
   8   3  -9   41.28    1.37
  13   2  -2   33.13    1.11
 -13  -2   2   31.47    3.05
 -13   2   2   33.76    2.74
  13   2  -2   31.33    1.25
  13  -2  -2   31.73    1.30
  13  -2  -2   32.94    1.20
 -12  -3   0   10.11    2.26
  12  -3   0   10.18    1.83
  12   3   0    6.41    0.62
  12  -3   0    5.86    0.79
  12   3   0    4.92    0.70
  12  -3   0    6.56    0.84
   9  -3  -8   21.74    1.73
  -9  -3   8   21.30    2.65
   9  -3  -8   19.69    1.09
   9   3  -8   20.25    0.99
   9   3  -8   19.42    1.43
   9  -3  -8   22.04    1.18
 -13  -2  -2    6.49    1.05
 -13  -2  -2   10.45    2.10
  13   2   2    5.33    0.52
  13  -2   2    5.29    0.66
  13  -2   2    6.67    0.81
   4  -5  -6    2.61    0.69
   4  -5  -6    2.86    0.85
  -4  -5   6    3.65    1.70
   4   5  -6    2.54    1.17
   4   5  -6    2.10    0.74
   8  -3   9    3.73    0.72
  -8   3  -9    5.32    1.24
   8  -3   9    5.13    1.07
  -8  -3  -9    7.01    2.03
  -8   3  -9    6.20    4.00
   8   3   9    5.69    1.07
   4   5   6    3.40    1.04
   4  -5   6    3.41    0.80
  -4   5  -6    2.97    1.22
   4  -5   6    4.37    1.19
  -4   5  -6    4.27    2.35
   4   5   6    3.45    0.76
  10   4  -2   77.95    3.22
 -10  -4   2   78.90    4.58
  10  -4  -2   80.89    2.82
  10   4  -2   80.73    2.60
  10  -4  -2   71.05    2.96
   6  -5  -4   34.07    1.56
  -6  -5   4   33.16    3.34
  -6  -5   4   36.48    2.97
   6  -5  -4   35.11    1.55
   6   5  -4   37.84    2.24
   6   5  -4   37.82    1.64
   5  -3 -11   13.13    1.36
  -5   3  11   12.83    1.61
   5  -3 -11    8.18    0.79
  -5  -3  11   11.72    1.98
   5   3 -11    6.71    1.20
   5   3 -11    8.15    0.74
   5  -3 -11    8.29    0.83
  -9  -3  -8  100.05    3.46
  -9  -3  -8   94.23    6.48
  -9   3  -8  103.56    4.02
   9   3   8  107.97    3.06
   9  -3   8   94.85    3.72
   9  -3   8  102.19    3.30
   9   3   8   97.37    3.73
  10   4   2   16.09    0.90
  10  -4   2   17.23    1.20
  10  -4   2   17.43    1.38
  10   4   2   14.97    1.30
 -10  -4  -2   16.99    2.51
  10  -4   2   17.12    2.10
  10  -4   2   17.35    1.18
   6  -5   4   56.37    2.95
   6  -5   4   65.61    2.61
   6   5   4   59.34    2.81
   6   5   4   59.53    2.30
  14   0  -1   -0.51    0.41
  14   0  -1    0.08    0.38
 -14   0   1   -0.68    1.66
  -7  -1  12   18.62    2.15
  -7   1  12   16.41    1.98
   7   1 -12   13.22    0.96
   7  -1 -12   13.11    0.78
   7   1 -12   14.29    0.79
   7  -1 -12   12.52    0.77
  14   0   1   -0.03    0.41
 -14   0  -1    1.23    1.57
  14   0   1   -0.05    0.34
   5  -3  11   36.23    2.20
  -5   3 -11   36.22    2.13
   5   3  11   38.22    2.07
  -5   3 -11   40.24    3.65
  -5   3 -11   36.15    1.32
   5  -3  11   36.41    1.52
  -5  -3 -11   36.44    2.77
  12   3  -1  218.67    6.00
  12  -3  -1  212.68    5.82
 -12  -3   1  204.16    7.71
  12  -3  -1  200.83    7.07
  12  -3  -1  228.57    6.07
  12   3  -1  227.17    5.90
  12  -3   1    2.05    0.87
  12  -3   1    1.85    0.68
 -12  -3  -1    1.60    1.81
  12  -3   1    1.53    0.70
  12   3   1    1.67    0.52
  12  -3   1    2.92    1.38
 -12  -3  -1    1.83    0.88
  12   3   1    1.48    0.47
   2  -5  -7   97.93    3.28
   2  -5  -7  100.82    3.37
   2   5  -7  109.23    4.24
  -2  -5   7   97.17    4.61
   2   5  -7   91.01    4.27
   2   5  -7   85.64    3.18
  -2   5  -7    4.01    1.30
   2  -5   7    4.80    1.32
  -2   5  -7    3.92    2.15
   2  -5   7    4.52    0.77
   2   5   7    4.03    0.75
   7  -1  12   13.88    1.51
  -7  -1 -12   10.55    2.51
   7   1  12   13.70    1.42
  -7   1 -12   15.24    1.44
  -7   1 -12   14.36    2.85
  11   3  -5    3.99    0.83
  11  -3  -5    3.82    0.72
  11  -3  -5    4.52    0.73
 -11  -3   5    7.33    2.26
  11  -3  -5    4.91    1.21
   5  -4  -9  300.15    7.80
   5  -4  -9  291.52    8.26
   5   4  -9  296.19    7.75
  -5  -4   9  296.30    9.44
   5   4  -9  317.52    9.04
   5  -4  -9  299.64    7.84
  -5   1  13   36.68    2.41
   5   1 -13   32.28    1.18
   5  -1 -13   34.64    1.17
   5   1 -13   35.92    1.46
   5   1 -13   36.73    1.48
   5  -1 -13   35.07    1.28
  -5  -1  13   40.51    2.68
  -2   0  14    6.01    1.45
   2   0 -14    4.59    0.62
   7   5  -2   24.17    1.89
   7  -5  -2   26.70    1.42
   7   5  -2   24.33    1.30
   7  -5  -2   20.36    1.20
  -7  -5   2   24.33    2.70
   7   5   2   12.88    1.02
   7   5   2   11.02    1.26
   7  -5   2   11.23    1.07
   7  -5   2   12.94    1.10
  12  -1  -7    1.72    0.51
  12  -1  -7    1.66    0.47
  12   1  -7    1.24    0.41
  12   1  -7    1.73    0.51
 -12  -1   7    2.88    1.92
 -12   1   7    2.49    1.74
  -2   0 -14  134.75    3.84
  -2   0 -14  114.78    5.16
   2   0  14  126.07    4.69
   5  -4   9   62.20    3.21
   5   4   9   66.25    2.95
   5  -4   9   67.95    2.56
  -5   4  -9   65.12    3.19
  -5   4  -9   61.55    4.57
  11  -3   5  145.18    4.33
  11  -3   5  130.69    4.50
  11   3   5  147.10    3.94
  11  -3   5  141.31    4.18
  -5  -1 -13   24.82    3.11
  -5   1 -13   27.86    1.73
  -5   1 -13   25.72    3.34
  -5   1 -13   25.35    1.27
   5   1  13   23.28    1.82
   9   4  -5    2.57    1.12
  -9  -4   5    3.97    2.55
   9  -4  -5    1.52    0.63
   9  -4  -5    1.30    0.70
   2   3 -12   24.26    1.28
   2   3 -12   25.32    1.31
   2  -3 -12   24.38    1.23
  -2   3  12   24.32    1.94
   2   3 -12   25.59    1.87
   2   3 -12   25.43    2.49
   2  -3 -12   26.36    1.21
  -2  -3  12   23.02    2.10
  10   0 -10   35.57    1.23
 -10   0  10   45.04    3.25
  10   0 -10   45.42    1.60
  12   1   7   72.13    3.11
  12  -1   7   71.54    2.35
  12  -1   7   70.89    3.05
  12   1   7   73.64    2.18
 -12   1  -7   76.06    2.34
   9  -4   5  245.23    6.60
   9   4   5  241.05    6.30
   9  -4   5  239.74    8.23
   9  -4   5  244.33    7.23
   9  -4   5  243.91    6.57
  -2  -3 -12   50.82    2.08
  -2   3 -12   50.51    2.67
   2  -3  12   50.97    2.83
   2   3  12   48.14    2.59
  -2   3 -12   49.78    2.00
  -2   3 -12   50.63    2.26
  -2   3 -12   56.92    4.19
   3   2 -13   27.40    1.67
  -3   2  13   29.20    2.09
   3  -2 -13   27.58    1.36
   3  -2 -13   27.92    1.13
   3   2 -13   26.70    1.10
   3   2 -13   27.71    1.39
  13   1  -5    8.99    0.62
  13  -1  -5   10.26    0.68
  13  -1  -5   11.77    0.78
 -13   1   5   12.49    2.12
 -13  -1   5   13.50    2.36
  13   1  -5   10.79    0.75
 -10   0 -10   49.49    1.77
  -3  -2 -13  108.05    3.38
   3   2  13  106.23    4.07
  -3   2 -13  100.53    3.49
   3  -2  13   92.94    3.83
  -3   2 -13  107.75    4.13
  -3   2 -13  123.21    6.18
  -3  -2 -13   88.21    4.29
   0  -1 -14   28.97    1.07
   0   1 -14   24.57    0.95
   0  -1  14   27.40    2.12
   0   1  14   27.13    1.98
   0   1 -14   27.15    1.48
  13  -1   5   26.99    1.80
  13  -1   5   27.82    1.09
  13   1   5   26.93    0.94
 -13   1  -5   27.57    1.05
   7  -3 -10    4.21    0.97
   7   3 -10    5.23    1.10
   7   3 -10    5.78    0.64
  -7   3  10    4.35    1.54
   7  -3 -10    5.51    0.70
  -7  -3  10    5.03    1.79
   7  -3 -10    5.24    0.74
  14   0  -2   70.33    2.28
 -14   0   2   74.09    4.17
  14   0  -2   74.64    2.25
  12   3  -2   27.65    1.05
  12  -3  -2   26.87    2.22
 -12  -3   2   24.43    2.82
  12   3  -2   27.76    1.35
  12  -3  -2   26.31    1.28
  14   0   2   22.35    1.09
 -14   0  -2   22.02    1.30
  14   0   2   22.68    0.90
 -12  -3  -2    2.75    0.99
  12   3   2    2.52    0.48
  12  -3   2    2.95    0.98
  12  -3   2    2.66    0.65
  12  -3   2    3.32    0.74
 -12  -3  -2    3.30    1.88
  12  -3   2    4.03    1.67
   9   0 -11    4.90    0.61
   9   0 -11    5.52    0.52
  -9   0  11    7.17    1.92
  -7   3 -10   64.44    3.21
   7  -3  10   65.68    2.52
  -7  -3 -10   59.56    4.05
   7  -3  10   59.76    2.94
   7   3  10   62.56    2.83
  -7   3 -10   61.98    5.04
  10  -3  -7   11.23    0.88
  10   3  -7   11.53    0.80
  10  -3  -7   14.24    1.52
 -10  -3   7   12.81    2.39
  10   3  -7   11.07    1.13
   3  -4 -10   32.72    1.83
  -3  -4  10   32.37    2.52
   3  -4 -10   33.54    1.45
   3   4 -10   26.79    1.90
   3   4 -10   32.81    1.55
   3  -4 -10   33.23    1.55
   1  -1 -14  103.08    2.99
   1   1 -14  106.33    3.57
  -1  -1  14   95.16    4.01
  -1   1  14   91.47    4.06
   1   1 -14   78.47    2.42
   1  -1  14  270.48    8.17
  -1   1 -14  300.96    8.12
   1   1  14  274.92    8.05
  -1  -1 -14  274.28    6.82
 -11   0   9  264.40    8.76
  11   0  -9  251.62    6.28
  11   0  -9  291.42    7.40
   3  -4  10    4.79    0.80
  -3  -4 -10    4.54    0.70
   3  -4  10    4.53    1.23
  -3   4 -10    4.33    1.23
  -3   4 -10    3.03    2.36
   3   4  10    5.77    1.14
  10  -3   7    0.16    0.53
  10   3   7    0.46    0.32
  10   3   7    1.00    1.01
  10  -3   7    0.32    0.60
  10  -3   7   -0.12    0.81
 -13   2   3    7.90    1.79
  13  -2  -3    2.69    0.65
  13   2  -3    2.19    0.52
  13   2  -3    2.51    0.40
 -13  -2   3    6.56    2.10
  -9   0 -11  255.16   10.97
  -9   0 -11  228.34    5.91
  13  -2   3  107.92    3.44
  13  -2   3  100.16    3.05
  13   2   3  102.26    2.90
 -13  -2  -3  101.26    3.93
  13  -2   3   94.31    3.63
   6   2 -12  252.67    6.49
  -6  -2  12  268.64    8.53
   6  -2 -12  258.01    6.53
   6  -2 -12  257.62    6.81
   6   2 -12  261.31    7.19
  -6   2  12  261.24    8.14
  11   0   9   15.99    0.92
 -11   0  -9    9.08    1.26
 -11   0  -9   15.39    0.82
  10   4  -3   36.14    1.96
  10   4  -3   35.24    1.30
  10  -4  -3   38.20    1.58
  10  -4  -3   33.73    1.52
 -10  -4   3   32.91    3.09
 -10  -4   3   33.28    2.34
  10  -4   3   52.25    2.15
  10  -4   3   50.67    3.45
  10  -4   3   44.86    2.32
  10  -4   3   52.04    2.14
  10   4   3   50.75    1.84
  14   1   0   10.06    0.64
  14  -1   0   10.51    0.84
  14  -1   0   10.35    0.72
 -14   1   0   11.86    2.21
  14   1   0    9.48    0.71
 -14  -1   0   10.65    2.23
  -6   2 -12   14.65    1.01
  -6   2 -12   14.30    3.07
   6  -2  12   14.38    1.58
  -6   2 -12   15.00    1.52
  -6  -2 -12   13.52    2.43
   6   2  12   14.54    1.51
  -6   2 -12   14.70    0.72
   3   5  -7    0.35    0.75
   3   5  -7   -0.53    1.12
  -3  -5   7    0.58    1.59
   3  -5  -7    0.27    0.64
  -3   5  -7    7.89    2.41
   3  -5   7    8.98    1.38
   3  -5   7    7.11    0.89
  -3   5  -7    5.80    1.36
   3   5   7    7.00    0.96
  12  -2  -6   39.38    1.34
  12   2  -6   44.47    1.79
 -12  -2   6   42.07    3.33
  12  -2  -6   36.43    1.28
  12   2  -6   40.04    1.22
 -12   2   6   37.54    2.97
  14  -1  -1  427.08    3.84
 -14  -1   1  421.74   12.61
 -14   1   1  419.19   12.56
  14  -1  -1  416.67   10.20
  14   1  -1  426.56    4.45
  14   1  -1  441.33    3.86
   7  -5  -3   77.25    2.79
   7   5  -3   84.82    3.56
  -7  -5   3   81.05    4.63
   7   5  -3   84.80    2.97
  -3   0  14   -0.58    1.23
   3   0 -14   -0.14    0.43
   3   0 -14   -0.08    0.24
  -9  -2  10   22.41    2.57
   9  -2 -10   19.53    1.01
   9   2 -10   20.79    0.93
  -9   2  10   20.85    2.20
   9   2 -10   19.57    1.19
   9  -2 -10   21.11    1.01
  14  -1   1   38.03    1.39
  14   1   1   35.88    1.09
  14  -1   1   39.53    1.20
 -14  -1  -1   40.05    3.34
  14   1   1   35.54    1.30
   7   5   3   11.66    0.93
   7  -5   3   11.94    1.10
   7   5   3    9.95    1.21
   7  -5   3    8.89    1.26
   7  -5   3   11.64    1.10
   6   0 -13   -0.10    0.31
   6   0 -13   -0.07    0.44
  -6   0  13   -0.06    1.49
 -10   2   9   60.46    3.59
  10   2  -9   62.35    2.37
  10   2  -9   63.55    2.16
  10  -2  -9   64.36    2.21
 -10  -2   9   70.83    3.89
  -3   0 -14   -0.15    0.37
  -3   0 -14   -0.15    1.86
   3   0  14   -0.18    1.19
 -12   2  -6    2.45    0.42
  12  -2   6   15.38    1.42
  12  -2   6    7.13    0.77
  12   2   6    5.74    0.53
  12   2   6   13.78    1.30
  12  -2   6    7.00    0.81
  -9   2 -10   39.01    1.37
  -9  -2 -10   43.57    4.26
   9   2  10   44.53    2.38
   9  -2  10   43.35    1.87
  -9   2 -10   43.94    1.52
   9  -2  10   42.59    2.35
  -9   2 -10   48.23    2.70
  -9  -2 -10   43.20    2.06
  -6   0 -13   -0.85    2.14
  -6   0 -13    0.09    0.30
   6   0  13   -1.29    1.02
   3  -3 -12  182.27    5.00
   3   3 -12  181.08    5.85
   3  -3 -12  200.04    5.72
  -3   3  12  187.53    6.18
  -3  -3  12  181.81    6.39
   3   3 -12  181.04    5.05
   2   1 -14   21.35    1.27
  -2   1  14   19.04    1.82
   2   1 -14   18.48    0.86
  -2  -1  14   19.50    1.96
   2  -1 -14   21.47    0.93
 -10   2  -9    4.44    1.03
  10  -2   9    3.97    0.73
  10   2   9    6.48    1.21
 -10  -2  -9    5.03    0.80
  10  -2   9    5.56    1.13
 -10   2  -9    4.56    0.58
  -3   3 -12   58.03    4.35
   3   3  12   49.80    2.59
  -3   3 -12   54.43    2.07
   3  -3  12   48.48    2.69
  -3   3 -12   50.74    2.70
  -3  -3 -12   51.56    2.12
   2   1  14   72.75    3.35
  -2  -1 -14   68.93    3.83
  -2   1 -14   70.92    4.26
  -2  -1 -14   80.29    2.47
  -2   1 -14   74.95    2.93
   2  -1  14   69.17    3.27
 -13   0   6   -0.09    1.94
  13   0  -6   -0.13    0.41
  13   0  -6   -0.16    0.40
 -10   1  10   37.79    2.86
  10   1 -10   37.78    1.65
 -10  -1  10   39.50    2.99
  10  -1 -10   38.60    1.22
  10   1 -10   37.90    1.24
  14   0  -3   -0.10    0.37
 -14   0   3   -0.24    1.82
  14   0  -3    0.25    0.40
   7  -4  -8   52.59    2.21
  -7  -4   8   50.87    3.49
   7  -4  -8   52.02    2.07
   7   4  -8   48.55    1.93
   7   4  -8   55.55    2.83
  13   0   6    0.55    0.94
  13   0   6    0.01    0.39
  12   3  -3   56.53    2.23
  12  -3  -3   52.73    2.05
  12  -3  -3   52.48    3.00
 -12  -3   3   46.14    3.58
  12   3  -3   54.28    1.88
   8  -4  -7   78.77    2.81
  -8  -4   7   80.90    4.43
   8  -4  -7   78.91    2.73
   8   4  -7   74.36    2.54
   8   4  -7   76.24    3.31
 -14   0  -3    0.19    0.51
  14   0   3    0.16    0.39
 -10   1 -10    0.30    0.69
 -10   1 -10    0.24    0.27
 -10  -1 -10    0.90    0.51
 -10  -1 -10    0.43    3.63
  10  -1  10    0.73    0.88
  10   1  10    1.11    0.98
  12  -3   3   32.46    2.76
  12   3   3   27.65    1.02
  12  -3   3   28.91    1.32
  12  -3   3   34.59    1.92
  12  -3   3   29.97    1.41
 -12  -3  -3   29.13    1.92
  -7   4  -8   35.75    2.14
  -7   4  -8   48.57    5.45
   7  -4   8   42.20    2.41
   7   4   8   41.12    1.38
   7  -4   8   42.78    1.94
   7   4   8   40.82    2.08
  -7  -4  -8   40.40    2.79
  -5  -5   6   77.05    4.31
   5  -5  -6   74.24    2.69
  -5  -5   6   89.20    6.61
   5   5  -6   73.42    2.76
   5  -5  -6   74.40    2.80
   5   5  -6   78.72    3.46
   8   4   7   22.21    1.01
  -8  -4  -7   21.82    2.66
  -8   4  -7   20.78    1.68
   8  -4   7   25.36    1.79
   8   4   7   24.19    1.69
   8  -4   7   19.03    1.16
   6  -5  -5   10.43    0.89
   6  -5  -5   10.51    1.00
  -6  -5   5    9.41    2.23
   6   5  -5   10.60    1.48
  -6  -5   5    7.79    2.06
 -14  -1   2    2.78    1.93
 -14   1   2    5.58    1.97
  14   1  -2    1.15    0.43
  14  -1  -2    1.24    0.58
  14   1  -2    1.14    0.43
  14  -1  -2    1.05    0.46
   5  -5   6    3.64    0.89
   5   5   6    4.36    0.98
   5  -5   6    3.69    1.14
  -5   5  -6    4.29    1.18
  -5   5  -6    3.79    2.80
   5   5   6    3.47    0.72
   6   5   5   69.96    2.55
   6   5   5   70.58    3.01
   6  -5   5   69.02    3.31
   6  -5   5   81.08    3.06
  14  -1   2   11.26    0.73
  14   1   2   12.16    0.71
 -14  -1  -2   11.40    2.22
 -14  -1  -2   12.31    1.27
  14  -1   2   11.65    0.92
  -8   0  12    5.32    1.71
   8   0 -12    3.57    0.48
   8   0 -12    2.82    0.50
   9   1 -11    0.29    0.38
  -9  -1  11    0.36    1.48
   9  -1 -11    0.63    0.42
   9  -1 -11    0.23    0.36
  -9   1  11    1.52    1.56
   4   2 -13    3.63    0.50
  -4   2  13    5.42    1.36
   4  -2 -13    3.04    0.52
   4  -2 -13    3.10    0.60
   4   2 -13    2.93    0.60
   4   2 -13    3.17    0.85
  11  -1  -9    0.49    0.47
  11   1  -9    0.10    0.35
  11  -1  -9   -0.07    0.38
 -11  -1   9   -0.05    1.73
 -11   1   9   -0.74    1.49
  11   1  -9    0.35    0.39
   8  -2 -11   39.29    1.43
   8   2 -11   36.58    1.24
  -8  -2  11   38.06    2.76
   8  -2 -11   37.93    1.29
  -8   2  11   38.71    2.62
   4   2  13   11.55    1.50
  -4   2 -13   10.56    1.34
  -4  -2 -13    9.93    1.92
  -4   2 -13   13.52    2.77
   4  -2  13   11.01    1.50
  -4   2 -13   11.08    0.91
   8   0  12    3.26    1.15
  -8   0 -12    2.48    2.46
   9  -1  11    3.64    1.13
  -9   1 -11    4.38    1.01
   9   1  11    3.15    1.07
  -9   1 -11    3.44    4.43
  -9  -1 -11    1.91    2.58
  -9   1 -11    3.85    0.44
 -12   0   8   36.55    2.90
  12   0  -8   38.59    1.24
  12   0  -8   42.10    1.51
  11  -2  -8   81.66    2.58
  11   2  -8   91.15    2.71
 -11  -2   8   95.05    4.77
  11  -2  -8   88.52    2.75
 -11   2   8   84.25    4.32
  11   2  -8   95.43    3.12
   8   2  11    5.40    1.25
  -8   2 -11    0.29    0.47
  -8   2 -11    1.50    1.04
  -8   2 -11    2.14    3.48
  -8  -2 -11    3.95    2.18
  -8   2 -11    0.52    0.30
   8  -2  11    3.42    1.17
 -11   1  -9   17.84    1.54
  11   1   9   19.96    1.65
 -11  -1  -9   17.91    1.04
  11  -1   9   17.04    1.52
  11  -1   9   18.42    1.01
   4  -4 -10   37.83    1.82
  -4  -4  10   33.56    2.60
   4  -4 -10   33.14    1.54
   4  -4 -10   34.50    1.97
   4   4 -10   35.87    1.70
   6  -3 -11   31.02    1.28
  -6  -3  11   33.67    2.72
  -6   3  11   33.35    2.47
   6  -3 -11   32.02    1.56
   6   3 -11   30.23    1.20
  12   0   8   39.06    1.40
  12   0   8   35.64    2.11
 -13   2   4    7.35    2.01
  13   2  -4    7.27    0.63
  13  -2  -4    8.67    0.76
 -13  -2   4   11.51    2.29
  13   2  -4    8.46    0.74
  13  -2  -4    7.80    0.69
   4  -4  10    5.03    0.77
  -4   4 -10    3.59    2.63
   4  -4  10    5.81    1.24
   4   4  10    5.03    1.02
  -4   4 -10    4.27    1.31
  11   2   8   47.00    1.49
 -11   2  -8   44.40    1.55
  11   2   8   41.73    2.21
  11  -2   8   44.78    1.80
  11  -2   8   41.11    2.18
   6  -3  11    0.30    0.57
  -6   3 -11    2.62    2.58
   6   3  11    0.82    0.89
   6  -3  11    0.61    0.99
  -6  -3 -11    1.13    1.49
  -6   3 -11    0.67    0.96
  13  -2   4   99.61    2.83
  13  -2   4   98.44    3.56
  13  -2   4  103.55    3.16
  13   2   4  103.18    2.62
   0  -5   8    4.68    1.43
   0   5  -8    2.04    1.65
   0  -5  -8    1.84    0.69
   0   5  -8    2.61    0.80
   0  -5  -8    3.29    0.70
  10   4  -4   17.31    1.48
  10   4  -4   18.08    1.00
 -10  -4   4   15.80    2.71
  10  -4  -4   16.61    1.06
  10  -4  -4   16.59    1.12
  11  -3  -6   12.68    0.94
  11  -3  -6   11.22    1.40
  11   3  -6   11.84    0.77
  11  -3  -6   13.05    0.95
  11   3  -6   13.34    1.16
   3  -1 -14   97.08    2.66
   3   1 -14   88.81    2.50
  -3   1  14   88.91    3.72
  -3  -1  14   90.36    3.85
   3   1 -14   95.78    3.01
  -6  -4   9   68.79    3.81
   6   4  -9   67.91    2.33
   6  -4  -9   70.39    2.37
   6   4  -9   77.49    3.30
   6  -4  -9   66.53    2.43
   0  -6   0    2.97    0.64
   0   6   0    4.02    1.20
   6  -1 -13   43.94    1.60
   6   1 -13   39.49    1.52
  -6  -1  13   46.93    2.96
  -6   1  13   47.84    2.98
   6  -1 -13   46.77    1.61
   6   1 -13   43.23    1.74
  10  -4   4   35.35    2.91
  10  -4   4   42.43    2.22
  10  -4   4   45.46    1.92
  10   4   4   43.66    1.56
  10  -4   4   46.41    1.93
  -3   1 -14  240.20    8.24
  -3  -1 -14  237.03    7.85
   3   1  14  235.03    6.59
  -3   1 -14  240.53    6.27
  -3  -1 -14  233.15    5.25
  -8  -5   0   75.51    4.21
   8   5   0   74.14    3.13
   8   5   0   73.06    2.45
   8  -5   0   71.26    2.50
   8  -5   0   70.79    2.50
  11  -3   6    7.82    1.13
  11   3   6    7.46    0.61
  11  -3   6    7.83    0.87
  11  -3   6    7.39    0.86
  11   3   6    8.18    1.22
   6   4   9   -0.54    0.76
   6  -4   9   -0.04    0.68
  -6   4  -9    0.15    2.45
  -6   4  -9    0.27    0.99
   6  -4   9    0.91    1.00
  -9  -4   6    0.59    1.96
   9   4  -6    0.11    0.55
   9  -4  -6    0.22    0.64
   9   4  -6    0.88    1.05
   1  -5  -8    5.81    0.83
   1   5  -8    5.85    0.97
   1   5  -8    4.91    1.69
   1  -5  -8    5.58    0.84
  -1  -5   8    6.58    1.59
  -1  -5  -8    2.44    0.67
  -1   5  -8    3.02    1.87
   1   5   8    2.55    0.79
  -1   5  -8    1.16    1.18
   1  -5   8    2.74    1.23
   1  -5   8    2.45    0.73
   6  -1  13   -0.07    1.10
  -6   1 -13    0.90    2.22
  -6  -1 -13   -0.53    1.89
   6   1  13    0.40    1.04
  -6   1 -13   -0.03    0.72
   4   5  -7    3.21    0.82
   4   5  -7    2.49    1.21
  -4  -5   7    3.46    1.60
   4  -5  -7    2.32    0.73
   4  -5  -7    2.47    0.79
   4   5   7   41.45    1.88
   4  -5   7   39.66    2.50
  -4   5  -7   39.37    2.44
  -4   5  -7   36.12    3.53
   4  -5   7   41.48    1.79
   9  -4   6   28.47    2.44
   9  -4   6   28.20    1.37
   9   4   6   32.65    1.96
  -9  -4  -6   31.41    3.63
   9  -4   6   30.26    1.45
   9  -4   6   29.45    1.84
   9   4   6   29.59    1.12
  -7  -5   4   18.13    2.51
   7   5  -4   22.09    1.76
  -7  -5   4   21.59    2.72
   7  -5  -4   19.10    1.24
   7   5  -4   21.75    1.31
   0  -6  -1   21.90    1.29
   0   6   1   22.17    1.75
   0   6  -1   23.17    1.88
  -1  -6   0    0.40    0.67
  -1   6   0    1.01    1.08
   1   6   0    0.60    1.17
   4   0 -14    3.95    0.56
   4   0 -14    3.79    0.44
  -4   0  14    3.85    1.44
   7  -5   4   23.37    1.36
   7  -5   4   19.99    1.67
   7   5   4   23.51    1.23
   7  -5   4   22.84    1.39
  -8  -5   1   28.19    2.78
   8   5  -1   32.35    1.48
   8   5  -1   31.24    1.97
   8  -5  -1   30.56    1.49
   8   5   1    1.46    0.63
   8  -5   1    1.73    0.71
   8   5   1    2.00    0.91
  -8  -5  -1    0.92    1.66
   8  -5   1    1.28    0.78
  13  -1  -6    3.80    0.56
 -13   1   6    3.53    1.88
  13   1  -6    4.91    0.54
 -13  -1   6    6.43    2.12
  13  -1  -6    4.04    0.54
  13   1  -6    4.29    0.57
   4   0  14   73.92    3.22
  -4   0 -14   77.74    2.35
  -4   0 -14   76.83    4.56
   4   3 -12   29.90    1.28
   4  -3 -12   30.61    1.44
   4  -3 -12   31.08    1.27
  -4  -3  12   29.28    2.18
   4   3 -12   29.83    1.94
  -4   3  12   31.08    2.12
  14   1  -3  220.28    5.06
  14   1  -3  216.68    4.98
  14  -1  -3  210.19    4.97
 -14  -1   3  205.49    7.22
 -14   1   3  219.76    7.44
   1   6  -1    1.97    1.19
  -1   6   1    2.51    1.07
   1  -6  -1    1.75    0.72
  -1  -6   1    2.52    1.25
  -1   6  -1    5.48    1.09
   1   6   1    5.48    1.24
  -1  -6  -1    6.37    0.83
  13  -1   6   31.83    1.29
  13   1   6   33.47    1.19
  13   1   6   29.78    1.86
  13  -1   6   32.58    2.01
 -13   1  -6   32.53    1.27
  -4   3 -12   94.89    3.71
  -4   3 -12   84.99    2.50
   4   3  12   95.39    3.54
  -4   3 -12  100.75    5.57
   4  -3  12   89.05    3.63
  14   1   3    1.07    0.43
 -14  -1  -3    1.95    0.95
  14  -1   3    1.68    0.54
  14  -1   3    1.89    0.65
  14   0  -4  128.75    3.33
 -14   0   4  122.41    5.37
  12   3  -4   40.22    1.92
  12   3  -4   43.39    1.52
  12  -3  -4   43.52    1.76
  12  -3  -4   43.66    1.74
  12  -3  -4   45.88    2.71
   8   1 -12   55.36    1.98
  -8   1  12   57.21    3.32
  -8  -1  12   56.50    3.44
   8  -1 -12   53.03    1.77
   8  -1 -12   43.75    1.54
   8   1 -12   53.90    1.74
  14   0   4    4.41    0.51
 -14   0  -4    3.82    0.76
   2   5  -8    8.56    1.23
   2   5  -8    8.13    1.72
   2  -5  -8    7.93    0.89
  -2  -5   8    7.62    1.60
   2  -5  -8    7.46    0.86
   2   5  -8    6.39    0.91
  12  -3   4    1.61    0.93
  12  -3   4    1.03    0.66
  12   3   4    0.98    0.42
  12  -3   4    0.60    0.67
   2  -5   8   23.49    1.28
   2   5   8   24.80    1.40
  -2   5  -8   23.32    1.83
  -2   5  -8   25.66    3.01
   2  -5   8   24.52    2.08
  -2  -5  -8   24.31    1.34
   0   4 -11   35.60    2.24
   0  -4  11   32.91    2.39
   0   4 -11   38.72    1.91
   0   4 -11   34.51    2.97
   0  -4 -11   35.09    1.64
  -8  -1 -12    0.82    2.01
  -8   1 -12    0.68    2.76
  -8   1 -12   -0.01    0.72
   8   1  12   -0.11    0.89
   8  -1  12    0.59    1.03
   0  -6  -2  158.21    4.27
   0  -6   2  159.22    4.22
   0   6  -2  166.35    5.32
   0   6   2  160.76    5.05
  -2   6   0   47.54    2.42
   2   6   0   46.06    2.07
   2   6   0   46.07    2.57
  12  -1  -8    4.01    0.53
 -12  -1   8    4.09    1.80
  12   1  -8    4.11    0.52
  12  -1  -8    4.70    0.61
  12   1  -8    4.37    0.63
 -12   1   8    4.01    1.91
  -8  -5   2   37.09    3.09
   8   5  -2   37.76    2.25
   8  -5  -2   36.65    1.75
   8   5  -2   36.49    1.64
   8  -5  -2   32.82    1.62
   8  -5   2    7.23    0.97
   8   5   2    6.38    0.78
   8  -5   2    5.87    0.83
   8   5   2    6.06    1.09
   9   3  -9   72.17    2.20
   9  -3  -9   72.35    3.15
   9  -3  -9   75.42    2.38
   9   3  -9   83.08    3.05
  -9  -3   9   67.78    3.92
   9  -3  -9   80.84    2.63
   1   4 -11   81.90    4.18
   1  -4 -11   86.85    2.81
  -1  -4  11   85.03    3.80
   1  -4 -11   82.43    3.15
   1   4 -11   88.63    2.99
   1   4 -11   77.94    3.35
   1  -4 -11   81.70    2.66
  12   1   8    3.05    1.04
  12   1   8    0.66    0.34
  12  -1   8    0.56    0.49
  12  -1   8    2.54    1.01
  -1  -4 -11   25.52    1.30
  -1   4 -11   25.23    1.91
  -1   4 -11   25.63    1.49
   1  -4  11   27.32    2.19
  -1   4 -11   26.86    2.91
   1   4  11   24.32    1.83
   9  -3   9    7.38    1.25
  -9   3  -9    5.54    1.20
   9   3   9    8.33    1.26
   9  -3   9    4.71    0.76
  -9  -3  -9    5.99    2.08
   1   6  -2   66.52    3.10
  -1  -6   2   60.29    3.58
  -1  -6   2   69.54    2.44
   1  -6  -2   63.10    2.36
  -1  -6  -2    0.69    0.64
   1   6   2    0.85    1.02
  -1   6  -2    1.62    1.12
   1  -6   2    0.66    0.77
  -2  -6   1   12.96    1.81
   2  -6  -1   14.49    1.12
   2   6  -1   12.56    1.19
   2   6  -1   15.86    1.65
   2   6   1    1.12    1.09
  -2   6  -1    2.13    1.04
   2   6   1    3.19    0.86
  11   4   0   10.11    1.18
  11  -4   0   10.09    1.12
  11  -4   0   10.03    0.97
  11   4   0    9.87    0.76
 -11  -4   0   11.57    2.13
  11  -4   0   10.42    0.99
   7   2 -12   -0.20    0.35
   7  -2 -12    0.11    0.46
  -7   2  12   -0.17    1.16
  -7  -2  12   -0.64    1.63
   7   2 -12    0.46    0.72
 -11  -4   1   10.06    2.36
  11   4  -1   10.87    1.17
  11   4  -1   10.68    0.72
  11  -4  -1   10.93    1.01
  11  -4  -1    9.06    0.86
  11  -4  -1    9.47    1.08
  11  -4   1   81.03    3.13
  11   4   1   80.54    2.32
 -11  -4  -1   84.09    4.47
  11  -4   1   82.94    2.71
  11  -4   1   85.53    2.78
  11   4   1   80.30    2.91
   8   3 -10   14.22    0.84
   8  -3 -10   14.75    1.04
   8  -3 -10   12.56    0.84
   8   3 -10   15.62    1.39
   8  -3 -10   14.80    1.44
  -8  -3  10   12.67    2.14
   7   2  12  121.29    4.05
  -7   2 -12  111.62    3.39
   7  -2  12  115.48    4.11
  -7  -2 -12  127.76    6.05
  -7   2 -12  118.93    6.34
  -7   2 -12  125.55    4.39
   5   2 -13   12.87    0.77
  -5  -2  13   10.44    1.84
   5  -2 -13   10.94    0.77
   5   2 -13   12.00    0.93
  -5   2  13   11.88    1.69
   5   2 -13   12.27    1.20
   5  -2 -13   11.96    0.96
  10   3  -8   14.37    0.85
  10  -3  -8   15.79    1.55
 -10  -3   8   12.16    2.20
  10  -3  -8   14.41    1.00
  10   3  -8   17.07    1.35
  12  -2  -7  104.56    2.88
 -12  -2   7  100.08    4.86
  12  -2  -7   93.59    2.62
 -12   2   7  105.38    4.87
  12   2  -7  101.05    2.95
  12   2  -7  103.10    2.71
  -8  -3 -10    3.59    1.86
   8  -3  10    2.93    1.00
   8  -3  10    2.14    0.65
  -8   3 -10    3.04    1.19
  -8   3 -10    8.02    4.66
   8   3  10    4.31    1.11
   4   1 -14    0.04    0.57
  -4  -1  14    2.36    1.47
   4  -1 -14    0.26    0.37
  -4   1  14    0.24    1.21
   4   1 -14    0.56    0.31
  -5   2 -13    5.29    1.06
   5   2  13    4.94    1.16
   5  -2  13    7.55    1.37
  -5   2 -13    8.38    2.85
  -5   2 -13    3.83    0.72
  -5  -2 -13    8.02    2.00
 -10  -3  -8   19.33    3.82
  10  -3   8   17.68    1.14
  10   3   8   17.36    1.49
  10  -3   8   15.24    1.34
   7   0 -13   37.12    1.45
   7   0 -13   31.24    1.06
  -7   0  13   39.04    2.79
   4   1  14   14.52    1.66
  -4  -1 -14   13.70    2.21
  -4   1 -14   18.30    3.02
  -4   1 -14   14.38    1.26
  12  -2   7    0.05    0.55
 -12   2  -7    0.43    0.32
  12   2   7    0.63    1.10
  12   2   7    0.57    0.39
  12  -2   7    0.46    0.93
   2  -4 -11   31.47    1.84
  -2  -4  11   32.55    2.56
   2   4 -11   36.23    2.79
   2  -4 -11   32.01    1.57
   2   4 -11   28.77    2.00
   2  -4 -11   29.52    1.36
   2   4 -11   29.42    1.49
  -6  -5   6   27.90    2.92
   6  -5  -6   40.68    1.81
   6   5  -6   40.51    1.83
   6  -5  -6   39.89    1.82
  -6  -5   6   41.83    3.26
   6   5  -6   42.66    2.46
   5   4 -10   36.05    1.65
   5  -4 -10   33.68    1.63
   5  -4 -10   36.60    1.63
  -5  -4  10   35.29    2.80
  -7   0 -13   74.54    4.91
   7   0  13   76.94    3.16
   2  -4  11   18.49    1.13
  -2   4 -11   19.98    2.77
  -2  -4 -11   17.38    1.12
  -2   4 -11   15.96    1.66
   2   4  11   18.10    1.57
   2  -4  11   20.01    1.93
   2   6  -2   17.99    1.35
   2   6  -2   18.62    1.84
  -2  -6   2   19.12    2.21
   2  -6  -2   19.51    1.28
   2   6   2    2.53    1.21
  -2   6  -2    1.23    1.00
   2  -6   2    1.13    0.69
   2   6   2    1.63    0.75
  -6   5  -6   14.09    1.48
   6   5   6   13.99    1.34
  -6   5  -6   24.54    4.48
   6  -5   6   15.38    1.26
   6  -5   6   17.11    1.61
   6   5   6   13.53    0.97
 -13  -2   5  101.17    4.99
  13  -2  -5   93.14    2.68
  13  -2  -5   85.28    2.44
  13   2  -5   93.10    2.69
 -13   2   5   90.74    4.56
   5  -4  10   32.33    2.17
   5  -4  10   31.04    1.43
  -5   4 -10   31.19    2.09
  -5   4 -10   27.23    3.34
   5   4  10   29.69    1.77
   0   2  14    8.60    1.43
   0   2 -14    8.74    0.75
   0  -2 -14    8.61    0.70
   0   2 -14    8.12    1.11
   0  -2  14    9.41    1.35
   0   2 -14    8.64    2.15
  13   0  -7   15.51    0.79
  13   0  -7   14.36    0.82
 -13   0   7   16.87    2.47
   3  -5  -8    0.91    0.64
   3  -5  -8    1.01    0.64
   3   5  -8    0.94    1.31
  -3  -5   8    1.22    1.37
   3   5  -8    1.27    0.76
  13  -2   5    0.95    0.60
  13   2   5    1.85    0.45
  13  -2   5    1.67    0.66
  13  -2   5    1.92    0.95
 -10  -4   5   42.08    3.62
  10  -4  -5   41.09    1.75
  10   4  -5   41.86    2.25
  10  -4  -5   39.15    1.75
   3  -5   8   21.00    1.20
   3  -5   8   21.71    1.95
  -3   5  -8   19.46    1.87
  -3   5  -8   22.54    2.95
   3   5   8   21.45    1.34
  14  -1  -4    6.79    0.67
 -14   1   4    6.72    2.01
 -14  -1   4    5.44    1.98
  14   1  -4    6.93    0.64
   0   6   3    6.91    1.28
   0   6  -3    9.27    1.51
   0  -6  -3    8.84    1.10
   0  -6   3    9.35    1.01
   0  -6   3   19.16    2.24
  11  -4  -2   72.66    2.47
  11   4  -2   76.50    2.32
 -11  -4   2   67.08    4.21
  11   4  -2   74.33    2.91
  10  -4   5   13.32    1.35
  10  -4   5   11.10    1.00
  10  -4   5   11.10    0.99
  10   4   5   12.60    0.78
   3   6   0  294.85    7.79
  -3  -6   0  291.04    8.93
   3   6   0  301.18    4.63
   8  -5  -3    0.14    0.67
   8   5  -3    0.65    0.65
   8  -5  -3    0.21    0.67
   8   5  -3    0.88    1.15
  -8  -5   3    1.87    1.77
  11  -4   2   78.45    3.06
  11  -4   2   86.90    2.81
  11  -4   2   84.29    2.74
 -11  -4  -2   82.29    3.30
 -11  -4  -2   76.68    4.22
  11   4   2   83.44    2.40
  13   0   7   22.13    1.69
  13   0   7   21.30    0.91
  14  -1   4   32.70    1.29
  14  -1   4   29.55    1.85
  14   1   4   32.62    1.19
   8  -5   3    5.12    0.85
   8   5   3    5.68    0.70
   8  -5   3    5.37    0.85
   1   2 -14    1.00    0.40
   1   2 -14    0.95    0.82
   1  -2 -14    0.40    0.39
   1   2 -14   -0.26    1.69
  -1   2  14    0.91    1.14
  -1   2 -14   50.42    2.49
  -1  -2 -14   50.45    1.80
   1   2  14   53.84    2.73
  -1   2 -14   52.18    1.98
   1  -2  14   47.56    2.63
  -1   2 -14   55.58    3.73
  -5  -5   7   38.83    3.00
   5   5  -7   42.62    2.47
   5  -5  -7   37.62    1.71
   5   5  -7   35.90    1.76
   5  -5  -7   41.23    1.92
  -7  -5   5   10.46    2.11
   7  -5  -5   10.40    1.00
  -7  -5   5    6.98    2.06
   7   5  -5    9.85    1.42
   7  -5  -5    9.57    0.99
   5  -5   7   21.21    1.84
   5   5   7   23.07    1.25
  -5   5  -7   24.38    3.28
  -5   5  -7   19.89    1.81
   5  -5   7   22.84    1.33
  -1  -6   3  150.78    6.05
   1   6  -3  165.49    5.26
   1  -6  -3  159.81    4.33
   1   6  -3  151.66    4.33
   1  -6   3   96.83    2.96
   1   6   3   98.33    3.64
  -1  -6  -3  107.16    3.25
  -1   6  -3  100.43    3.84
   5   0 -14   -0.18    0.45
  -5   0  14    0.31    1.44
   5   0 -14   -0.03    0.25
   3  -6  -1   37.80    1.78
  -3  -6   1   42.46    3.00
   3   6  -1   39.44    1.90
   3  -6  -1   37.04    1.77
   3   6  -1   36.07    2.27
   3  -6   1   43.50    1.94
   3   6   1   48.34    2.60
   3   6   1   52.32    2.23
   7   5   5   39.83    1.65
   7   5   5   42.53    2.20
   7  -5   5   39.49    2.33
   7  -5   5   43.88    1.95
   5   0  14    0.71    1.12
  -5   0 -14   -0.75    2.02
  14  -2   0    9.68    0.90
  14   2   0    7.78    0.67
 -14  -2   0    8.31    2.33
  14   2   0    9.10    0.64
  14  -2   0    9.37    0.77
 -10   0  11   -1.19    1.44
  10   0 -11   -0.13    0.33
   0   3 -13  103.86    3.88
   0   3  13  104.33    3.91
   0  -3 -13  106.55    3.11
   0  -3  13  103.74    4.12
   0   3 -13   95.34    2.94
   0   3 -13  105.21    3.28
   0   3 -13  107.91    4.96
   5  -3 -12    9.99    0.90
   5   3 -12    9.70    0.77
   5  -3 -12   10.67    0.86
   5   3 -12    8.97    1.28
  -5  -3  12   10.88    1.91
  -5   3  12   15.50    1.80
  11   0 -10   -0.07    0.35
 -11   0  10    0.71    1.83
  11   0 -10   -0.11    0.46
   8   4  -8  282.99    7.43
   8   4  -8  247.37    5.76
   8  -4  -8  254.92    6.20
   8  -4  -8  258.57    6.09
  -8  -4   8  267.77    8.43
  -5   3 -12    0.39    0.45
  -5  -3 -12    1.15    1.31
  -5   3 -12   -0.17    2.49
  -5   3 -12    0.37    1.02
   5  -3  12    0.41    1.02
   5   3  12    1.49    0.98
 -10   0 -11    3.50    4.13
  14  -2  -1   91.89    2.74
 -14  -2   1   93.00    4.59
  14  -2  -1   93.38    2.62
 -14   2   1   92.19    4.48
  14   2  -1   78.09    2.82
  14   2  -1   87.10    2.42
  14   2   1    0.10    0.30
 -14  -2  -1    1.33    1.49
  14  -2   1    0.12    0.58
  14  -2   1   -0.42    0.49
   8  -4   8   84.54    2.74
   8   4   8  105.20    3.70
   8  -4   8   99.62    3.77
  -8   4  -8   90.21    3.56
   1   3 -13   52.49    2.05
   1  -3 -13   54.73    1.99
   1   3 -13   42.15    1.73
  -1   3  13   51.25    2.65
  -1  -3  13   51.55    2.90
   1   3 -13   53.05    2.65
   1   3 -13   57.22    3.44
 -11   0 -10   -0.22    0.28
   1  -3  13    0.32    1.21
  -1   3 -13   -1.38    1.99
  -1   3 -13    0.38    1.00
  -1   3 -13    0.13    0.55
  14   0  -5    0.42    0.43
 -14   0   5   -0.24    1.70
  14   0  -5    0.19    0.37
   7  -3 -11  165.39    4.40
   7   3 -11  150.98    3.79
   7  -3 -11  156.67    3.98
  -7  -3  11  156.29    5.81
  12  -3  -5   30.70    1.32
  12  -3  -5   30.74    1.33
  12  -3  -5   20.07    1.99
  12   3  -5   27.21    1.37
  -2   2  14    0.26    1.14
   2   2 -14    1.04    0.86
   2   2 -14    0.53    0.37
   2  -2 -14    0.14    0.40
  14   0   5   -0.12    0.40
  14   0   5    0.22    0.90
  12   3   5   78.69    2.18
  12  -3   5   80.75    2.67
  12  -3   5   71.99    2.96
  12  -3   5   75.28    2.48
 -13  -3   0   18.11    2.64
  13  -3   0   15.56    1.02
  13  -3   0   15.64    1.09
  13  -3   0   16.12    2.03
  13   3   0   15.34    0.82
  13   3   0   12.42    0.86
  -7   3 -11    0.52    1.00
   7   3  11    1.33    1.03
   7  -3  11    1.02    0.62
   7  -3  11    1.20    1.06
  -7  -3 -11    0.88    1.72
  -7   3 -11   -0.43    2.69
  -2   2 -14   42.50    2.31
  -2   2 -14   41.16    1.82
   2  -2  14   38.44    2.35
   2   2  14   39.80    2.37
  -2  -2 -14   40.51    1.61
  -2   2 -14   40.64    3.51
   3  -4 -11   21.18    1.23
  -3  -4  11   22.04    2.21
   3   4 -11   20.33    1.23
   3   4 -11   20.35    1.61
   3  -4 -11   21.57    1.20
  11   3  -7   21.81    0.98
  11  -3  -7   22.95    1.17
  11   3  -7   24.18    1.40
  11  -3  -7   18.26    1.67
  11  -3  -7   20.63    1.14
   2  -6  -3   18.23    1.23
  -2  -6   3   17.67    2.24
   2  -6  -3   18.77    1.23
   2   6  -3   17.71    1.29
   2   6  -3   19.16    1.77
   3   4  11    5.00    1.21
   3  -4  11    3.94    1.38
  -3   4 -11    4.68    1.31
  -3  -4 -11    3.98    0.67
   3  -4  11    4.03    0.72
  -3   4 -11    6.04    2.68
   2   6   3   11.10    1.36
   2  -6   3   11.85    1.03
  -2   6  -3    9.54    1.28
   2   6   3   11.16    0.97
   3   6  -2   24.25    1.48
   3   6  -2   23.56    1.86
   3  -6  -2   22.70    1.32
  -3  -6   2   24.74    2.50
   3  -6  -2   23.66    1.38
   7  -4  -9    6.44    0.82
   7  -4  -9    7.66    0.82
   7   4  -9    6.80    0.74
   7   4  -9    6.55    1.10
  -7  -4   9    7.92    1.92
   7  -1 -13   38.69    1.44
  -7   1  13   43.79    2.88
  -7  -1  13   48.94    3.13
   7  -1 -13   46.33    1.61
   7   1 -13   46.51    1.80
   7   1 -13   39.58    1.42
   3  -6   2    5.70    0.91
   3   6   2    6.62    0.91
   3   6   2    6.15    1.21
  -3   6  -2    6.29    1.31
 -10  -2  10    1.37    1.70
 -10   2  10    0.07    1.44
  10  -2 -10    1.33    0.54
  10   2 -10    0.98    0.66
  10   2 -10    0.63    0.41
  10  -2 -10    0.97    0.51
  11  -3   7   72.87    2.48
  11   3   7   74.34    3.02
  11  -3   7   71.56    2.49
  11   3   7   74.56    2.10
  11  -3   7   71.50    2.97
   9   4  -7   26.52    1.82
   9   4  -7   23.55    1.13
   9  -4  -7   24.59    1.36
  -9  -4   7   26.91    2.81
   9  -4  -7   22.99    1.23
  13  -3  -1    4.01    0.71
  13   3  -1    3.04    0.44
 -13  -3   1    1.47    1.82
  13   3  -1    3.34    0.64
  13  -3  -1    3.63    1.43
  13  -3  -1    3.77    0.73
  -7   4  -9    3.66    3.45
   7  -4   9    3.31    0.84
   7   4   9    3.93    1.07
  -7   4  -9    2.87    1.15
   7  -4   9    4.71    1.15
  13  -3   1  114.96    3.89
  13  -3   1  125.68    3.46
  13   3   1  132.20    3.34
 -13  -3  -1  110.98    5.12
  13  -3   1  118.36    3.52
   7   1  13    4.69    1.23
  -7  -1 -13    3.14    2.22
  -7   1 -13    2.48    2.58
  -7   1 -13    2.48    0.88
   7  -1  13    2.44    0.88
   9  -4   7   12.90    1.32
   9  -4   7   14.17    1.93
   9   4   7   15.06    0.82
   9   4   7   14.05    1.40
   9  -4   7   14.07    1.10
 -10  -2 -10    4.92    3.02
  10  -2  10    4.27    0.69
  10   2  10    3.68    1.19
 -10   2 -10    4.71    1.06
  10  -2  10    4.68    1.17
  11   4  -3   18.03    1.41
  11  -4  -3   18.30    1.19
  11  -4  -3   18.48    1.17
 -11  -4   3   20.82    2.48
  11   4  -3   19.30    1.01
   0   0  15    1.08    1.28
   0   0 -15    0.03    0.44
  11  -4   3   17.15    1.42
  11  -4   3   18.13    1.19
  11  -4   3   19.09    1.19
  11   4   3   18.52    0.91
  13   1  -7   32.77    1.30
  13  -1  -7   38.08    1.36
  13   1  -7   43.22    1.47
  13  -1  -7   37.32    1.39
 -13   1   7   40.98    3.12
 -13  -1   7   44.71    3.39
 -14  -2   2   24.36    2.75
 -14   2   2   24.19    2.52
  14   2  -2   19.91    0.97
  14  -2  -2   22.00    1.15
  14  -2  -2   23.27    1.05
  14   2  -2   22.34    0.92
   9   0 -12    0.07    0.47
  -9   0  12   -0.08    1.62
   9   0 -12   -0.22    0.30
  14  -2   2    0.27    0.52
 -14  -2  -2   -0.56    1.65
  14  -2   2    0.46    0.59
  14   2   2    0.25    0.37
   2  -3 -13    2.76    0.58
   2   3 -13    2.18    0.55
   2   3 -13    2.21    0.59
  -2   3  13    2.72    1.08
  -2  -3  13    0.17    1.21
   2   3 -13    3.32    1.08
  -2   3 -13    1.53    2.34
  -2  -3 -13    0.33    0.44
  -2   3 -13    1.10    0.69
   2  -3  13    1.50    1.06
  -2   3 -13    1.49    1.07
   2   3  13    1.33    1.03
   9  -2 -11    3.92    0.62
   9   2 -11    3.78    0.79
  -9  -2  11    2.76    1.85
  -9   2  11    3.47    1.49
   9  -2 -11    3.42    0.56
   9   2 -11    3.85    0.52
   1   0 -15    0.43    0.46
  -1   0  15    1.27    1.25
  13  -1   7   21.05    1.64
  13   1   7   19.45    0.81
  13   1   7   21.69    1.69
  13  -1   7   19.10    0.95
  -1   0 -15    0.83    0.46
   1   0  15    0.95    1.25
  -1   0 -15   -0.35    1.49
  12   0  -9    0.03    0.46
  12   0  -9    0.05    0.40
 -12   0   9   -0.33    1.70
  -9   0 -12   -2.35    2.46
  11   2  -9   32.83    1.28
 -11   2   9   37.07    2.87
  11  -2  -9   36.04    1.45
 -11  -2   9   40.64    3.14
  11   2  -9   39.87    1.70
   4  -5  -8    6.29    0.83
   4  -5  -8    8.20    1.03
   4   5  -8    5.34    0.94
   4   5  -8    6.20    1.33
  -4  -5   8    6.24    1.81
  -9  -2 -11  134.00    6.43
  -9   2 -11  145.90    3.42
   9   2  11  148.86    4.62
  -9   2 -11  155.44    5.07
   9  -2  11  137.93    4.48
   4  -5   8   10.97    1.46
  -4   5  -8   11.58    1.52
   4  -5   8   11.67    1.02
  -4   5  -8   11.89    2.70
   5   1 -14    3.14    0.44
  -5   1  14    3.44    1.49
  -5  -1  14    3.47    1.25
   5   1 -14    3.10    0.66
   5  -1 -14    3.19    0.54
   0  -6   4   38.46    2.73
   0  -6   4   42.66    3.86
   0   6  -4   38.13    3.19
   0  -6  -4   36.99    2.69
  12   0   9   -0.05    0.93
   8   5  -4   27.64    1.91
   8  -5  -4   24.80    1.34
   8   5  -4   29.76    1.41
  -8  -5   4   30.75    3.04
  -4  -6   0  193.35   12.57
   4   6   0  205.15    3.75
   4   6   0  195.88   12.14
 -11  -2  -9    1.34    0.61
  11   2   9    3.21    0.91
  11  -2   9    0.47    0.87
 -11   2  -9    0.50    0.86
   8   5   4    0.70    0.44
   8  -5   4    0.58    0.56
   8  -5   4    1.07    0.72
  -5   1 -14   86.83    3.14
   5   1  14   85.85    5.79
  -5   1 -14   95.08    5.36
  -5  -1 -14   87.36    4.73
 -15   0   0   -0.92    1.71
  15   0   0   -0.28    0.44
  15   0   0    0.04    0.40
  13   3  -2   27.18    1.06
  13  -3  -2   26.43    1.29
  13   3  -2   21.20    1.17
   0  -5  -9    0.54    0.59
   0   5  -9    0.29    1.58
   0  -5   9   -0.21    1.29
   0   5  -9   -0.17    1.08
   0  -5  -9   -0.21    0.49
   0   5  -9   -0.08    0.67
 -10  -1  11    0.92    1.84
  10   1 -11    0.39    0.40
  10  -1 -11    0.11    0.49
 -10   1  11   -0.52    1.62
  10  -1 -11    0.59    0.41
  13  -3   2    1.41    0.77
  13  -3   2    1.60    0.65
 -13  -3  -2   -0.11    1.80
  13   3   2    1.26    0.45
  13  -3   2    1.45    0.69
 -11  -1  10   76.05    5.84
  11  -1 -10   76.74    4.72
  11   1 -10   77.43    4.97
 -11   1  10   78.40    5.85
  11   1 -10   78.30    4.80
  -1  -6   4   16.61    2.21
   1  -6  -4   13.56    1.10
   1   6  -4   15.75    1.74
   1  -6  -4   15.92    1.18
   1   6  -4   11.83    1.15
  -1   6  -4   20.87    1.73
   1   6   4   21.48    1.65
  -1  -6  -4   23.24    1.31
   1  -6   4   21.76    1.21
   4   6  -1   52.12    3.90
   4   6  -1   54.65    3.74
  -4  -6   1   55.20    4.56
   4  -6  -1   51.75    3.54
   4  -6  -1   54.00    3.68
   4   6   1   40.95    2.92
   4  -6   1   41.85    2.98
   4   6   1   39.16    3.18
  10   1  11  134.47    8.50
 -10   1 -11  184.46   14.11
 -10  -1 -11  133.91   10.76
  10  -1  11  121.89    7.79
   9  -5   0    5.98    0.87
   9  -5   0    7.09    0.96
   9   5   0    6.50    1.30
  -9  -5   0    6.54    1.92
   9   5   0    6.49    0.80
 -15   0   1    0.57    1.65
  15   0  -1    1.60    0.43
  15   0  -1    1.69    0.51
   3   2 -14    0.48    0.74
   3   2 -14    0.24    0.35
   3  -2 -14    0.50    0.50
  -3   2  14    0.83    1.08
   1  -5  -9   20.36    1.25
   1   5  -9   20.25    2.24
   1  -5  -9   21.42    1.28
   1   5  -9   22.09    1.44
  -1  -5   9   20.65    2.11
  15   0   1   25.18    1.15
 -15   0  -1   20.02    2.52
  15   0   1   23.63    0.92
   1  -5   9    2.42    1.32
  -1   5  -9    0.41    1.15
   1  -5   9    1.07    0.66
  -1  -5  -9    1.59    0.68
  -1   5  -9    2.44    2.11
   6   2 -13   20.80    0.94
   6  -2 -13   22.06    1.02
  -6  -2  13   24.12    2.41
   6  -2 -13   21.24    1.17
  -6   2  13   21.22    2.02
   6   2 -13   20.65    1.33
 -11   1 -10    0.13    0.80
  11   1  10    0.98    1.03
  11  -1  10   -0.75    0.91
  -3   2 -14   72.06    6.09
  -3   2 -14   61.07    4.08
   3   2  14   61.33    4.41
  -3  -2 -14   58.23    4.63
  -3   2 -14   67.95    4.77
   3  -2  14   56.77    4.22
  14  -1  -5   19.15    0.97
  14  -1  -5   18.59    0.87
 -14  -1   5   22.00    2.88
 -14   1   5   21.48    2.48
  14   1  -5   19.70    0.94
   2   0 -15   -0.31    0.41
  -2   0  15    0.13    0.98
   3   6  -3    5.44    1.30
   3  -6  -3    6.06    0.79
  -3  -6   3    7.33    1.72
   3  -6  -3    6.15    0.77
   3   6  -3    7.75    0.99
   3   6   3    5.83    1.09
  -3   6  -3    5.76    1.35
   3   6   3    6.40    0.86
   3  -6   3    7.25    0.91
   6  -2  13   -0.45    1.10
  -6  -2 -13   -0.84    1.69
   6   2  13    0.15    0.96
  -6   2 -13   -0.34    2.35
  -6   2 -13    0.16    0.87
  -2   0 -15   -0.06    0.34
  -2   0 -15   -0.83    1.55
   2   0  15   -0.91    1.08
  14  -1   5   18.28    0.92
  14  -1   5   17.12    1.49
  14   1   5   19.04    0.81
   9  -5  -1   48.26    3.29
   9   5  -1   51.35    3.81
   9   5  -1   46.04    3.06
  -9  -5   1   50.43    4.51
   9  -5   1    4.27    0.86
   9  -5   1    5.47    0.90
   9   5   1    4.91    0.74
   9   5   1    6.37    1.17
  -9  -5  -1    5.85    1.75
  -6  -4  10   30.57    3.12
   6  -4 -10   29.69    2.17
   6  -4 -10   30.67    2.29
   6   4 -10   30.57    2.22
   6   4 -10   34.40    2.95
  13   2  -6    0.57    0.50
  13  -2  -6    0.72    0.54
 -13  -2   6   -0.23    2.08
 -13   2   6   -1.28    1.65
  13  -2  -6    0.66    0.58
  13   2  -6    0.16    0.38
   6  -4  10   15.96    1.60
  -6   4 -10   16.34    1.75
   6  -4  10   17.49    1.15
   6   4  10   16.86    1.52
  -6   4 -10   17.12    2.97
 -14   2   3    9.90    2.03
 -14  -2   3    8.63    2.28
  14   2  -3    5.10    0.64
  14  -2  -3    7.03    0.77
  14   2  -3    6.41    0.60
  13  -2   6   38.61    3.01
  13  -2   6   41.28    2.78
  13   2   6   42.20    3.22
  13   2   6   39.62    2.54
  10  -4  -6    0.37    0.60
 -10  -4   6    1.11    1.54
  10   4  -6    0.60    0.85
  10   4  -6    1.02    0.49
   3  -3 -13   84.94    5.30
  -3  -3  13   83.98    5.98
  -3   3  13   84.89    5.82
   3   3 -13   80.77    5.48
   3   3 -13   82.07    5.15
  14   2   3    9.64    0.63
  14  -2   3    9.98    1.21
  14  -2   3   11.36    0.98
  14  -2   3   10.44    0.83
   4  -4 -11   25.56    1.25
   4  -4 -11   27.35    1.49
   4   4 -11   25.74    1.32
   4   4 -11   23.97    1.82
  -4  -4  11   23.63    2.27
   0  -1 -15   88.99    5.45
   0   1  15   90.32    6.14
   0  -1  15   87.34    5.97
   0   1 -15   85.46    5.46
   2   6  -4    9.87    1.51
   2  -6  -4   11.04    1.04
   2  -6  -4    9.92    0.98
   2   6  -4    9.01    1.14
  -2  -6   4   13.33    2.14
  -3   3 -13  154.71    9.79
  -3   3 -13  171.61   11.78
   3  -3  13  138.26    8.86
  -3   3 -13  147.03    9.07
   3   3  13  150.95    9.53
   2   6   4   86.60    5.80
   2  -6   4   90.48    5.70
  -2   6  -4   88.22    6.01
   2   6   4   81.96    5.28
  10  -4   6   53.40    3.57
  10   4   6   54.13    3.88
  10   4   6   56.02    3.54
  10  -4   6   52.14    3.80
  10  -4   6   57.46    3.81
   4   6  -2    7.53    1.04
  -4  -6   2    8.99    1.91
   4  -6  -2    6.50    0.92
   4   6  -2    6.30    1.34
   4  -6  -2    6.38    0.82
   4   4  11   25.56    1.68
  -4   4 -11   29.04    3.89
   4  -4  11   26.02    1.93
   4  -4  11   27.59    2.07
  -4   4 -11   28.23    2.58
   4   6   2   88.57    5.96
   4  -6   2   91.76    5.81
   4   6   2   89.06    5.72
  15   0  -2   -0.03    0.40
  15   0  -2   -0.08    0.43
 -15   0   2   -0.37    1.67
  -9  -1  12   88.59    6.43
   9  -1 -12   83.70    5.13
   9  -1 -12   86.96    5.32
   9   1 -12   89.47    5.55
  -9   1  12   87.91    6.32
   9   1 -12   77.36    4.81
   2   5  -9    1.83    1.53
   2  -5  -9    2.85    0.65
   2   5  -9    3.44    0.88
   2  -5  -9    3.64    0.66
  -2  -5   9    3.17    1.44
  15   0   2   -0.05    0.29
  -2   5  -9   88.33    6.03
  -2   5  -9   90.60    7.05
   2  -5   9   92.53    5.81
   2  -5   9   90.40    6.28
  -2  -5  -9   92.00    5.81
   6  -5  -7    4.49    0.76
   6  -5  -7    4.98    0.83
   6   5  -7    5.25    0.85
  -6  -5   7    4.27    1.73
   6   5  -7    5.48    1.44
   8  -2 -12    1.50    0.54
   8   2 -12    1.24    0.40
  -8  -2  12    1.20    1.71
  -8   2  12    1.35    1.36
   8  -2 -12    1.20    0.50
   1  -1 -15    6.92    0.63
  -1   1  15    8.56    1.45
  -1  -1  15    7.50    1.53
   1   1 -15    6.96    0.89
   7  -5  -6   11.88    1.05
   7   5  -6    9.97    0.96
  -7  -5   6   11.28    2.11
   7  -5  -6    9.88    0.98
   7   5  -6    9.48    1.27
  11   4  -4   20.33    1.02
  11  -4  -4   19.39    1.18
  11  -4  -4   18.26    1.09
  11   4  -4   17.38    1.35
 -11  -4   4   21.06    2.75
  -1   1 -15    1.28    1.73
  -1  -1 -15    0.24    0.30
   1  -1  15    1.18    1.22
   1   1  15    0.41    1.07
  -1   1 -15    0.55    0.59
  12   1  -9  103.30    6.31
 -12  -1   9  108.46    7.68
 -12   1   9  108.29    7.58
  12  -1  -9  124.25    7.48
  12   1  -9  110.17    6.80
  12  -1  -9  118.53    7.12
   6   5   7   57.68    4.09
  -6   5  -7   56.02    4.11
   6  -5   7   65.35    4.32
   6   5   7   58.22    3.80
   6  -5   7   54.12    4.06
  -6   5  -7   70.43    6.73
   6   0 -14   50.95    3.28
   6   0 -14   51.47    3.24
  -6   0  14   55.43    4.34
  -9   1 -12   49.51    5.31
   9  -1  12   45.19    3.41
  -9  -1 -12   39.90    4.44
   9   1  12   47.64    3.54
  -7   5  -6   14.77    1.54
   7   5   6   17.12    1.50
   7  -5   6   16.69    1.23
   7   5   6   17.57    1.03
   7  -5   6   16.07    1.52
  11  -4   4   13.09    1.30
  11  -4   4   12.80    1.04
  11   4   4   12.53    0.77
  11  -4   4   13.34    1.09
   9   5  -2    5.48    1.26
  -9  -5   2    7.33    2.23
   9  -5  -2    6.20    0.86
   9  -5  -2    5.24    0.87
   9   5  -2    5.55    0.73
  13   3  -3   33.63    2.39
  13  -3  -3   35.22    2.49
  13   3  -3   34.57    2.30
   9  -5   2   16.12    1.18
   9   5   2   15.03    0.99
   9  -5   2   15.03    1.18
   8   2  12   11.21    1.43
  -8   2 -12    5.51    1.17
  -8  -2 -12   11.19    2.52
   8  -2  12    4.45    1.13
  12   2  -8  179.91   11.44
  12   2  -8  151.89    9.04
 -12  -2   8  200.50    5.99
  12  -2  -8  181.35   10.79
 -12   2   8  195.00   12.66
  12  -2  -8  198.56    2.86
  13  -3   3   52.34    3.75
  13  -3   3   57.12    3.74
  13  -3   3   55.22    3.67
  13   3   3   53.57    3.37
   6   0  14   34.53    2.87
  -6   0 -14   37.72    4.30
  12  -1   9   19.41    1.60
 -12   1  -9   16.19    1.47
  12  -1   9   16.32    0.99
  12   1   9   20.55    1.69
  -6  -3  12  118.16    8.03
   6  -3 -12  123.90    7.53
   6  -3 -12  126.32    7.77
   6   3 -12  122.66    7.43
   6   3 -12  121.25    7.71
  -6   3  12  125.07    8.27
  15  -1   0   99.73    6.03
  15  -1   0   99.94    6.15
  15   1   0   98.11    6.03
 -15   1   0  108.05    7.70
  15   1   0   89.57    5.41
 -15  -1   0  100.93    7.29
   8   0 -13   -0.26    0.47
   8   0 -13   -0.13    0.33
  -8   0  13   -0.12    1.50
  12  -2   8    7.65    1.19
  12  -2   8    8.13    0.82
  12   2   8    8.74    1.33
   6   3  12   10.89    1.37
   6  -3  12   10.93    1.50
  -6  -3 -12   10.68    1.99
  -6   3 -12    9.79    2.78
  -6   3 -12   11.89    1.50
  14   0  -6   41.56    2.67
 -14   0   6   40.20    3.93
  14   0  -6   34.25    2.30
   3   0 -15  105.16    6.41
  -3   0  15  106.82    7.14
  12   3  -6    1.98    0.48
  12   3  -6    2.25    0.77
  12  -3  -6    2.06    0.58
  12  -3  -6    2.05    0.70
  -8   0 -13   -1.07    2.09
   8   0  13   -0.80    0.99
  15  -1  -1   21.12    0.93
 -15  -1   1   20.30    2.71
  15   1  -1   19.35    1.05
  15   1  -1   22.24    0.90
  15  -1  -1   22.42    1.10
 -15   1   1   17.13    2.29
   9  -3 -10   22.81    1.22
   9   3 -10   23.57    1.56
   9  -3 -10   22.85    1.14
  -9  -3  10   19.93    2.46
   9   3 -10   21.96    0.99
  -3   0 -15   12.85    0.79
  -3   0 -15   14.47    2.34
   3   0  15   12.88    1.68
 -15  -1  -1   49.04    4.38
  15  -1   1   46.31    3.08
  15   1   1   49.05    3.11
  15  -1   1   45.61    2.91
  13   0  -8   -0.10    0.33
 -13   0   8   -0.00    1.76
  13   0  -8    0.25    0.41
  14   0   6   75.72    5.14
  14   0   6   77.12    4.71
  10  -3  -9   27.01    1.25
  10   3  -9   30.80    2.41
  10   3  -9   30.53    2.10
  10  -3  -9   28.79    2.08
  12  -3   6   52.28    3.48
  12  -3   6   50.76    3.42
  12  -3   6   48.56    3.57
  12   3   6   52.49    3.84
  12   3   6   52.82    3.32
   2  -1 -15    6.12    0.62
   2   1 -15    5.00    0.77
  -2  -1  15    5.21    1.60
  -2   1  15    7.74    1.55
   9   3  10    2.73    1.06
  -9  -3 -10    3.56    2.09
   9  -3  10    1.96    1.06
  -9   3 -10    2.60    3.81
  -9   3 -10    0.58    0.98
   9  -3  10    0.91    0.66
  -2   1 -15    8.95    2.25
   2   1  15    7.68    1.43
  -2  -1 -15    9.24    1.77
  -2  -1 -15    8.86    0.64
  -2   1 -15    9.76    1.04
   2  -1  15    8.77    1.30
  10  -3   9   60.54    3.98
 -10  -3  -9   54.89    5.36
  10  -3   9   54.58    3.96
 -10   3  -9   58.00    4.21
  10   3   9   58.11    4.13
  13   0   8   -0.04    0.71
  13   0   8   -0.08    0.41
   4   2 -14  107.65    6.54
   4  -2 -14  102.53    6.24
  -4   2  14  107.05    7.17
   4   2 -14   99.19    6.36
   5   5  -8   18.06    1.81
   5  -5  -8   18.00    1.27
   5   5  -8   17.06    1.22
  -5  -5   8   13.33    1.98
   5  -5  -8   15.86    1.11
   4  -2  14   66.78    4.77
  -4   2 -14   78.72    5.42
  -4   2 -14   87.18    6.97
   4   2  14   75.06    5.19
  -4  -2 -14   73.39    5.57
   5  -5   8    3.77    1.05
  -5   5  -8    3.06    2.62
  -5   5  -8    4.15    1.31
   5  -5   8    3.75    0.81
   0  -6   5    0.99    1.42
   0  -6  -5    0.86    0.62
   0  -6   5   -0.07    0.68
   0   6  -5    1.03    1.21
   3   6  -4    0.90    1.17
   3  -6  -4    0.61    0.71
   3   6  -4   -0.28    0.74
  -3  -6   4   -0.09    1.52
   3  -6  -4   -0.12    0.66
   8  -5  -5    1.80    0.72
   8  -5  -5    1.66    0.67
  -8  -5   5    2.00    1.77
   8   5  -5    1.21    1.11
   4   6  -3    1.68    0.85
  -4  -6   3    0.60    1.50
   4  -6  -3    2.06    0.73
   4   6  -3    1.03    1.19
   4  -6  -3    1.51    0.69
   3   6   4    2.90    0.71
  -3   6  -4    4.02    1.23
   3  -6   4    3.16    0.75
   3   6   4    2.64    0.89
  -4   6  -3    0.23    1.11
   4  -6   3   -0.00    0.73
   4   6   3    0.36    0.65
   4   6   3    0.65    0.98
   5   6   0    0.40    0.59
  -5  -6   0    0.35    1.38
   5   6   0    0.93    1.10
  15   0  -3    0.65    0.49
 -15   0   3   -0.49    1.79
  15   0  -3    0.95    0.41
   8  -5   5    9.73    1.05
   8   5   5   11.23    0.83
   8   5   5   11.12    1.27
   3  -5  -9   20.76    1.24
   3   5  -9   21.37    1.38
   3   5  -9   21.38    1.93
   3  -5  -9   18.27    1.12
  -3  -5   9   22.84    2.29
  15   0   3   52.92    3.31
  -3   5  -9   14.96    2.78
   3  -5   9   12.77    1.62
   3  -5   9   13.37    1.03
  -3   5  -9   11.59    1.57
   1   6  -5  153.66    9.80
  -1  -6   5  160.42   10.66
   1  -6  -5  151.51    9.23
   1  -6  -5  149.71    9.17
   1   6   5   17.61    1.49
  -1  -6  -5   18.08    1.26
   1  -6   5   18.82    1.26
  -1   6  -5   18.69    1.89
  15  -1  -2    0.90    0.37
  15   1  -2    1.09    0.45
 -15   1   2    2.82    1.87
  15   1  -2    1.03    0.47
 -15  -1   2    1.22    1.89
  15  -1  -2    1.21    0.41
   5   6  -1   74.34    5.16
   5   6  -1   81.04    5.24
  -5  -6   1   77.34    5.87
   5  -6  -1   79.83    5.18
   5   6   1   80.06    5.18
   5  -6   1   81.75    5.27
   5  -6   1   78.57    5.07
   5   6   1   71.90    5.00
   9   5  -3   -0.30    1.10
   9  -5  -3    0.94    0.72
  -9  -5   3    1.12    1.79
   9  -5  -3    0.98    0.69
   9   5  -3    1.00    0.67
  14  -2  -4   10.81    0.83
  14  -2  -4    9.09    0.76
 -14  -2   4   14.89    2.55
 -14   2   4   16.47    2.45
  14   2  -4    8.11    0.77
  14   2  -4    9.23    0.68
  15  -1   2   23.67    0.98
  15  -1   2   24.57    1.21
  15   1   2   25.41    0.91
   9  -5   3   27.45    2.14
   9  -5   3   27.38    2.12
   9   5   3   27.24    1.21
  -4   3  13    6.13    1.37
  -4  -3  13    7.40    1.61
   4  -3 -13    6.38    0.76
   4   3 -13    5.43    0.65
   4   3 -13    5.70    1.14
   0   4 -12  184.91   11.52
   0  -4  12  195.18   12.32
   0   4 -12  196.49   12.73
   0  -4 -12  202.81    3.46
   0   4 -12  188.55   11.45
  14   2   4   98.65    5.97
  14  -2   4   96.70    6.35
  14  -2   4   99.55    6.10
  14  -2   4  109.35    6.78
   6   1 -14   81.44    5.16
  -6   1  14   85.78    6.02
   6  -1 -14   62.78    4.60
   6   1 -14   74.18    4.65
   6  -1 -14   80.93    4.97
  -6  -1  14   82.08    5.88
   8   3 -11    9.81    0.72
   8  -3 -11   10.00    0.83
   8   3 -11   10.47    1.21
   8  -3 -11   10.07    0.89
  -8  -3  11   11.55    2.16
   4  -3  13    4.62    1.36
   4   3  13    6.33    1.30
  -4   3 -13    2.04    1.15
  -4   3 -13    4.86    2.22
  -6   1 -14    9.43    2.69
  -6   1 -14    9.86    1.10
  -6  -1 -14   10.39    2.33
   6   1  14   11.10    1.50
  11   3  -8    2.05    0.76
  11   3  -8    2.01    0.49
  11  -3  -8    2.33    0.67
   1   4 -12    0.55    1.73
   1   4 -12    1.41    0.74
  -1  -4  12    3.37    1.48
   1  -4 -12    1.30    0.59
   1   4 -12    1.29    1.20
   8  -3  11   33.63    2.82
  -8  -3 -11   37.18    3.99
   8   3  11   32.67    2.66
  -8   3 -11   37.61    3.10
  -8   3 -11   36.51    4.64
  -1   4 -12   11.00    2.48
  -1  -4 -12    7.23    0.79
  -1   4 -12    8.37    1.04
  -1   4 -12    8.92    1.37
   1  -4  12   11.56    1.65
   8  -1 -13   96.64    5.93
   8   1 -13   99.14    6.11
   8  -1 -13  102.60    6.23
  -8  -1  13  106.58    7.42
  -8   1  13  106.22    7.30
   8   1 -13   95.64    5.86
  -8  -4   9    2.92    2.02
   8  -4  -9    6.10    0.89
   8   4  -9    6.14    0.73
   8  -4  -9    5.80    0.77
   8   4  -9    8.27    1.36
  12  -4   0  122.08    7.52
  12  -4   0  122.35    7.54
  12  -4   0  111.97    7.18
  12   4   0  106.81    6.46
 -12  -4   0  122.07    8.63
   9   4  -8  114.32    7.35
   9  -4  -8   92.19    5.74
   9  -4  -8  111.85    6.96
   9   4  -8   99.02    6.08
  -9  -4   8  110.61    7.87
  13   3  -4   77.06    4.74
  13   3  -4   88.44    5.55
  13  -3  -4   84.53    5.28
  13  -3  -4   84.58    5.29
  11   3   8   52.80    3.81
  11  -3   8   57.19    3.77
  11  -3   8   50.36    3.68
 -14  -1   6   21.66    2.78
  14  -1  -6   18.70    0.87
 -14   1   6   17.23    2.34
  14   1  -6   18.32    0.83
  14   1  -6   16.29    0.88
  14  -1  -6   18.31    0.95
  -8   4  -9    5.91    1.17
   8  -4   9    7.50    0.93
  -8   4  -9   19.76    4.93
   8   4   9    9.31    1.25
   8  -4   9   12.21    1.39
  13  -3   4   12.99    1.35
  13  -3   4   12.98    1.04
  13   3   4   13.42    0.75
  13  -3   4   13.79    1.05
  -3   1  15    0.89    1.33
   3   1 -15    0.53    0.56
   3  -1 -15    0.30    0.39
  -3  -1  15    1.20    1.37
  -5  -4  11    8.92    1.80
   5  -4 -11    7.65    0.82
   5  -4 -11    8.04    0.89
   5   4 -11    8.45    0.83
  -9   4  -8    3.50    1.11
   9  -4   8    2.44    0.74
   9   4   8    4.46    1.07
   9  -4   8    3.81    1.07
  -2  -6   5    5.00    1.61
   2   6  -5    5.41    1.32
   2  -6  -5    4.72    0.87
   2  -6  -5    4.52    0.77
   8  -1  13    0.10    1.06
   8   1  13    2.07    1.10
  -8   1 -13    1.16    2.66
  -8  -1 -13    0.49    2.18
  -2   6  -5    6.69    1.47
   2  -6   5    8.33    0.97
   2   6   5    7.38    1.13
   2   6   5    7.51    0.90
  -3   1 -15    2.95    0.74
   3   1  15    3.47    1.17
  -3  -1 -15    3.29    1.70
  -3   1 -15    4.34    2.11
  -5  -6   2    4.97    1.72
   5  -6  -2    4.76    0.95
   5   6  -2    5.75    1.29
   5  -6  -2    4.16    0.92
   5   6  -2    5.90    0.98
  -5   4 -11   11.83    2.98
  -5   4 -11   13.26    1.65
   5  -4  11   12.76    0.98
   5  -4  11   14.46    1.60
   5   4  11   12.68    1.33
   5   6   2   41.84    2.96
   5   6   2   40.44    3.17
   5  -6   2   39.87    2.84
  12   4  -1   64.65    4.32
  12  -4  -1   58.41    4.11
  12   4  -1   69.79    4.35
  12  -4  -1   69.63    4.50
  12  -4  -1   65.41    4.28
 -12  -4   1   65.46    5.47
 -13   1   8    2.41    1.83
  13  -1  -8    3.12    0.61
  13   1  -8    2.40    0.55
 -13  -1   8    1.95    2.03
  13  -1  -8    2.70    0.51
  13   1  -8    2.45    0.50
  14  -1   6    5.16    0.62
  14  -1   6    8.24    1.23
  14   1   6    5.72    0.53
  12  -4   1   51.46    3.69
  12   4   1   55.79    3.54
  12  -4   1   58.88    3.89
  12  -4   1   59.47    3.91
 -12  -4  -1   56.97    4.86
 -11  -4   5   13.22    2.48
  11  -4  -5   11.94    0.98
  11  -4  -5   11.87    0.99
  11   4  -5   11.32    1.22
   4   0 -15   -0.07    0.38
  -4   0  15   -0.71    1.30
  13  -1   8  119.87    7.27
  13   1   8  121.23    7.76
  13  -1   8  110.17    7.11
  13   1   8  115.99    6.97
  11   4   5   11.51    0.71
  11  -4   5   10.56    0.98
  11  -4   5   10.16    1.24
  11  -4   5   12.00    1.06
   4   0  15   -0.02    1.25
  -4   0 -15   -0.09    1.93
   7  -2 -13    8.77    0.84
   7   2 -13    7.14    0.60
  -7  -2  13   10.52    1.89
  -7   2  13    9.23    1.72
   7   2 -13    7.77    0.91
   7  -2 -13    7.79    0.73
   2  -4 -12    1.08    0.52
   2   4 -12    0.92    0.63
   2  -4 -12    1.61    0.61
  -2  -4  12    2.07    1.35
   2   4 -12    2.49    1.19
  -2   4 -12   35.83    3.66
  -2  -4 -12   31.71    2.34
  -2   4 -12   29.91    2.69
   2  -4  12   30.30    2.84
   2   4  12   32.02    2.69
  -2   4 -12   29.40    2.29
  15   1  -3   58.59    3.82
 -15  -1   3   59.81    5.07
 -15   1   3   62.51    5.12
  15  -1  -3   62.32    3.95
  15   1  -3   58.82    3.66
  -7   2 -13   29.19    2.56
   7  -2  13   26.47    1.91
   7   2  13   25.40    1.76
  -7  -2 -13   25.76    2.88
  15   1   3   10.64    0.66
  15  -1   3   11.11    0.75
 -11   0  11    1.34    1.66
  11   0 -11    2.57    0.44
  13   2  -7    0.82    0.42
  13  -2  -7    0.31    0.45
  13  -2  -7    0.24    0.40
  13   2  -7    0.32    0.54
 -13  -2   7    2.22    2.10
 -13   2   7    1.76    1.77
   7  -4 -10    1.66    0.68
   7   4 -10    1.57    0.55
  -7  -4  10    1.75    1.55
   7   4 -10    1.26    1.17
   7  -4 -10    1.62    0.59
   4   6  -4    1.26    0.68
   4  -6  -4    0.84    0.74
   4   6  -4    1.12    1.19
   4  -6  -4    1.16    0.67
  -4  -6   4    1.00    1.77
   4   6   4    5.73    0.80
   4  -6   4    7.21    0.98
   4   6   4    5.97    1.09
  -4   6  -4    6.06    1.30
 -15   0   4    0.66    1.90
  15   0  -4    0.04    0.39
  12  -4  -2    8.22    0.84
 -12  -4   2    7.56    1.88
  12   4  -2    7.45    1.01
  12   4  -2    9.16    0.75
 -12  -4  -2   23.93    2.67
  12  -4   2   27.48    2.11
  12   4   2   23.58    1.01
  12  -4   2   24.62    1.35
  12  -4   2   22.15    1.56
   4   5  -9    4.71    0.86
   4  -5  -9    4.83    0.88
  -4  -5   9    3.66    1.62
   4  -5  -9    4.99    0.82
   4   5  -9    4.42    1.38
   7  -4  10  132.86    8.19
   7  -4  10  114.35    7.47
  -7   4 -10  124.63    8.12
  -7   4 -10  114.72    8.79
   7   4  10  115.11    7.39
  10  -4  -7   21.98    1.28
 -10  -4   7   25.05    2.82
  10   4  -7   19.84    1.03
  10   4  -7   21.40    1.56
  13   2   7   54.68    3.46
  13   2   7   53.73    3.89
  13  -2   7   55.39    3.61
  13  -2   7   44.69    3.35
  15   0   4   -0.34    0.38
 -11   0 -11   16.32    4.78
  -4   5  -9  105.47    8.03
   4  -5   9  104.49    6.55
   4  -5   9  102.87    6.92
  -4   5  -9  101.22    6.77
  10   4   7   13.66    1.41
  10  -4   7   15.51    1.48
  10  -4   7   15.66    1.12
  10   4   7   15.66    0.81
   9   5  -4   13.97    1.63
  -9  -5   4   15.79    2.57
   9  -5  -4   11.03    1.03
   9   5  -4   11.51    0.94
  -5  -2  14   38.54    3.44
   5  -2 -14   38.38    2.56
   5   2 -14   37.07    2.45
   5   2 -14   39.39    2.89
  -5   2  14   36.34    3.13
   9   5   4    4.49    0.64
   9  -5   4    4.45    0.85
   9  -5   4    5.23    0.96
  10   0 -12    8.10    0.59
 -10   0  12    9.05    1.90
  10   0 -12    9.46    0.75
   7   5  -7   25.71    1.33
  -7  -5   7   29.74    3.31
   7   5  -7   26.13    2.04
   7  -5  -7   26.17    1.35
   7  -5  -7   25.48    1.38
  -5   2 -14   34.34    2.87
   5  -2  14   33.77    2.92
   5   2  14   32.29    2.71
  -5  -2 -14   32.96    3.32
  -3  -6   5   -0.32    1.35
   3  -6  -5   -0.23    0.63
   3  -6  -5   -0.10    0.70
   3   6  -5    0.04    1.21
   3   6   5    3.04    0.98
  -3   6  -5    2.40    1.30
   3  -6   5    2.54    0.83
   3   6   5    2.10    0.67
 -12   0  10   25.01    2.59
  12   0 -10   28.60    1.98
  12   0 -10   28.50    1.93
  10   2 -11   -0.58    0.65
 -10   2  11    0.66    1.61
  10   2 -11    0.02    0.33
  10  -2 -11    0.15    0.47
 -10  -2  11    2.90    2.03
  10  -2 -11   -0.44    0.48
   5  -6  -3    2.28    0.78
   5  -6  -3    2.00    0.85
   5   6  -3    2.70    0.92
   5   6  -3    3.40    1.22
  -5  -6   3    2.16    1.75
   7   0 -14    0.33    0.49
   7   0 -14   -0.15    0.32
  -7   0  14    0.90    1.58
   7   5   7    2.28    0.93
   7  -5   7    2.35    1.04
   7   5   7    1.62    0.53
  -7   5  -7    8.49    4.24
  -7   5  -7    0.78    1.06
   7  -5   7    1.57    0.80
   5   6   3    0.97    0.89
   5  -6   3    1.33    0.67
   5   6   3    1.09    0.63
  11   2 -10    0.96    0.43
  11  -2 -10    1.04    0.52
 -11  -2  10    2.58    1.83
  11   2 -10    0.98    0.60
 -11   2  10    2.35    1.68
 -10   0 -12    4.14    2.97
  -7   0 -14    0.40    2.34
   7   0  14   -1.21    1.09
 -10  -2 -11   25.28    3.33
 -10   2 -11   30.51    2.69
  10   2  11   25.92    1.77
  10  -2  11   30.13    2.17
   7  -3 -12    0.72    0.56
   7   3 -12    0.60    0.40
  -7  -3  12    0.81    1.51
   7  -3 -12    0.40    0.49
  12   0  10    7.22    1.22
  11  -2  10    9.37    1.29
  11   2  10   10.17    1.35
 -11  -2 -10   12.45    4.31
 -11   2 -10   11.55    1.42
  14   2  -5   14.22    0.88
 -14   2   5   15.90    2.44
 -14  -2   5   20.34    2.67
  14  -2  -5   13.90    0.88
  14  -2  -5   15.37    0.94
   0   5 -10   55.98    2.85
   0  -5  10   54.53    3.46
   0   5 -10   56.36    3.96
   0   5 -10   56.95    3.28
   0  -5 -10   59.68    2.85
   7   3  12    3.36    1.05
  -7   3 -12    3.54    2.65
  -7   3 -12    2.86    1.07
   7  -3  12    3.54    1.19
  -7  -3 -12    2.51    1.56
  -6  -5   8   17.94    2.26
   6  -5  -8   16.33    1.16
   6   5  -8   16.03    1.69
   6  -5  -8   17.24    1.19
   6   5  -8   15.41    1.12
   3   4 -12   64.95    3.00
   3  -4 -12   56.96    2.74
   3  -4 -12   68.17    3.09
  -3  -4  12   66.55    3.97
   3   4 -12   64.58    3.52
 -14   0   7   -0.27    1.82
  14   0  -7    0.01    0.38
  14   0  -7   -0.20    0.44
  -5   3  13   30.76    2.42
   5   3 -13   29.46    1.79
   5  -3 -13   28.31    1.25
  -5  -3  13   28.07    2.38
   5   3 -13   29.19    1.17
   4   1 -15    6.49    0.80
  -4  -1  15    5.61    1.67
  -4   1  15    6.21    1.49
   4  -1 -15    6.20    0.64
  14   2   5   48.34    2.08
  14  -2   5   50.39    2.87
  14  -2   5   49.13    2.28
   0   6  -6   10.78    1.58
   0  -6  -6   12.86    1.09
   0  -6   6   13.87    1.92
   0  -6   6   12.90    1.07
   0  -6  -6   11.51    1.02
  12  -3  -7    0.69    0.60
  12  -3  -7    0.34    0.58
  12   3  -7    0.07    0.67
  12   3  -7    0.46    0.44
   3   4  12    4.23    1.11
   3  -4  12    5.42    1.23
  -3   4 -12    5.39    2.03
  -3   4 -12    5.78    1.21
   8  -5  -6   26.14    1.41
   8   5  -6   25.81    1.97
   8   5  -6   20.44    1.15
   8  -5  -6   23.56    1.31
  -8  -5   6   25.94    2.76
   6  -5   8    7.45    0.95
  -6   5  -8    7.18    2.58
  -6   5  -8    7.44    1.33
   6  -5   8    7.04    1.34
  -5   3 -13   12.27    1.48
   5   3  13   10.87    1.37
  -5   3 -13   13.14    2.54
  -5  -3 -13   10.94    1.70
   5  -3  13   10.20    1.45
  -4  -1 -15   56.19    3.96
  -4   1 -15   63.63    4.67
  -4   1 -15   58.47    2.91
   4   1  15   61.56    3.44
   6   6   0   54.25    2.70
   6  -6   0   60.98    2.95
  -6  -6   0   54.84    3.87
   6   6   0   53.62    3.08
   8   5   6   97.74    4.55
   8   5   6   94.61    3.89
   8  -5   6  105.90    4.50
   1   5 -10   -0.07    1.01
   1  -5 -10   -0.10    0.60
   1   5 -10    0.97    1.52
   1  -5 -10    0.37    0.53
  -1  -5  10    0.61    1.24
   1   5 -10    0.60    0.74
  14   0   7    0.07    0.37
  14   0   7   -1.06    1.00
  -1   5 -10    4.91    2.09
  -1   5 -10    4.81    0.89
  -1  -5 -10    4.72    0.75
  -1   5 -10    5.43    1.25
   1  -5  10    5.98    1.42
  10  -5   0    1.21    0.76
 -10  -5   0    3.05    1.76
  10   5   0    2.13    1.13
  10  -5   0    1.21    0.78
  10   5   0    1.73    0.64
  12  -3   7   12.80    1.01
  12  -3   7   12.19    1.00
  12   3   7   13.38    0.70
  12   3   7   13.89    1.48
   1  -6  -6    7.90    0.94
   1   6  -6    7.16    1.01
   1   6  -6    7.70    1.46
  -1  -6   6    8.14    1.83
   1  -6  -6    7.56    0.88
   1   6   6   15.84    1.16
   1  -6   6   14.69    1.12
  -1   6  -6   17.31    1.79
  12  -4  -3    3.04    0.75
  12   4  -3    2.31    0.80
 -12  -4   3    3.41    2.00
  12   4  -3    3.38    0.61
  12  -4  -3    4.21    0.78
  -6  -6   1  109.06    5.89
   6  -6  -1  121.02    5.14
   6   6  -1  114.75    4.81
   6   6  -1  111.71    5.17
  13  -3  -5    1.07    0.66
  13   3  -5    1.10    0.62
  13  -3  -5    0.87    0.63
   6  -6   1   27.29    1.60
   6   6   1   24.01    1.80
   6  -6   1   26.00    1.45
   6   6   1   25.64    1.44
  12  -4   3   63.92    2.97
  12  -4   3   54.61    2.95
  12   4   3   69.66    2.89
  12  -4   3   68.53    3.15
   0  -2 -15   11.20    0.79
   0   2 -15    9.48    2.00
   0   2 -15    9.82    1.15
   0  -2  15    9.46    1.53
   0   2  15   13.00    1.61
 -10  -5   1   38.84    3.41
  10   5  -1   40.65    2.00
  10  -5  -1   41.43    2.20
  10   5  -1   41.38    2.61
 -10  -5  -1    5.84    1.98
  10  -5   1    4.79    0.76
  10   5   1    5.04    0.67
  10  -5   1    4.47    0.84
 -11   1  11   18.69    2.21
  11   1 -11   19.74    1.02
 -11  -1  11   19.51    2.51
  11  -1 -11   18.95    0.89
  11   1 -11   18.19    0.88
   0  -3 -14    1.46    0.50
   0   3 -14    0.50    0.96
   0   3 -14    1.25    0.59
   0   3 -14    0.95    1.98
   0  -3  14    1.78    1.40
   0   3  14    0.33    1.10
  13  -3   5    3.23    1.01
  13  -3   5    4.36    0.74
  13   3   5    4.02    0.50
  13  -3   5    5.15    0.83
   9  -2 -12   11.38    0.79
   9  -2 -12   12.54    0.89
   9   2 -12   12.05    0.78
  -9   2  12   11.53    2.04
  -9  -2  12   13.55    2.28
 -15   1   4   85.62    5.14
 -15  -1   4   82.84    5.01
  15  -1  -4   79.81    3.32
  15   1  -4   61.00    2.65
  -1   2  15   -0.00    1.08
   1  -2 -15    1.09    0.43
   1   2 -15    1.15    0.82
   1  -2  15   36.59    2.61
  -1   2 -15   37.60    2.34
  -1  -2 -15   30.67    1.78
  -1   2 -15   36.55    3.04
   1   2  15   38.12    2.64
  15   1   4    0.30    0.42
  15  -1   4    0.23    0.48
  15  -1   4    0.77    0.92
  12  -2  -9   90.30    3.68
  12   2  -9   82.75    3.42
  12   2  -9   79.37    3.59
 -12   2   9   88.24    5.03
 -12  -2   9   91.52    5.33
  12  -2  -9   84.55    3.48
  11   1  11    5.20    1.20
  11  -1  11    4.12    1.13
 -11  -1 -11    5.64    3.81
  -1  -3  14  136.89    6.34
   1   3 -14  143.41    5.69
   1   3 -14  146.18    6.36
  -1   3  14  138.45    6.13
   1  -3 -14  156.86    6.12
   1   3 -14  144.32    6.98
  -9  -2 -12   72.22    5.22
  -9   2 -12   86.69    4.31
   9   2  12   81.23    3.96
   9  -2  12   87.11    4.27
  -1   3 -14    1.47    1.10
  -1   3 -14    2.46    2.08
  -1  -3 -14    0.77    0.51
   1   3  14    3.63    1.33
  -1   3 -14    1.67    0.65
   1  -3  14    3.43    1.44
   5   0 -15   80.03    3.30
  -5   0  15   86.95    4.55
  12  -2   9    0.97    0.64
 -12   2  -9    1.33    0.94
  12  -2   9    1.87    0.96
  12   2   9    2.63    1.12
   9   0 -13   43.42    2.02
   9   0 -13   42.49    1.90
  -9   0  13   41.00    3.20
   2  -5 -10    1.58    0.64
   2   5 -10    1.54    0.77
  -2  -5  10    2.08    1.43
  10  -1 -12    4.94    0.56
 -10   1  12    5.47    1.76
  10  -1 -12    5.66    0.65
 -10  -1  12    5.88    1.91
  -5   0 -15   -0.89    2.06
   5   0  15    0.09    1.21
   2  -5  10    0.54    1.25
   2  -5  10    0.13    0.65
  -2   5 -10    0.64    1.15
  -2  -5 -10    0.47    0.60
  -2   5 -10    1.43    2.22
  14  -3   0    5.36    0.82
  14  -3   0    5.86    0.70
  14   3   0    6.20    0.63
  15   2   0   13.48    0.76
 -15  -2   0   13.40    2.45
  15  -2   0   13.64    0.90
  15  -2   0   14.15    0.97
  -6  -4  11   16.05    2.10
   6  -4 -11   12.73    1.02
   6  -4 -11   13.38    1.01
   6   4 -11   13.23    0.92
   2   6  -6   67.58    3.26
   2  -6  -6   68.61    3.17
  -2  -6   6   70.73    4.41
   2  -6  -6   67.57    3.14
   2   6  -6   72.84    3.91
 -12   1  10   32.91    2.98
 -12  -1  10   32.75    3.04
  12  -1 -10   35.93    1.71
  12   1 -10   34.44    1.63
  12  -1 -10   35.07    1.75
  12   1 -10   35.37    1.79
  -7   1  14   48.06    3.30
  -7  -1  14   47.58    3.40
   7  -1 -14   38.46    1.90
   7  -1 -14   45.85    2.08
   7   1 -14   37.90    1.87
   7   1 -14   47.27    2.28
   2  -6   6   -0.13    0.62
  -2   6  -6    0.49    1.19
   2   6   6    0.85    0.60
   2   6   6    0.38    0.68
   6   6  -2    8.20    1.36
  -6  -6   2    9.02    1.90
   6   6  -2   10.12    1.07
   6  -6  -2    9.34    1.14
  -9   0 -13    7.07    2.76
   6  -6   2    2.35    0.87
   6   6   2    2.44    0.80
   6  -6   2    3.29    0.88
   6   6   2    2.77    0.99
  13   0  -9    4.60    0.63
  13   0  -9    3.79    0.50
 -13   0   9    4.96    1.86
  -6   4 -11  104.39    5.01
   6   4  11   94.58    4.42
   6  -4  11   95.32    4.65
  -6   4 -11  105.21    6.63
   6  -4  11   98.70    4.23
  10  -1  12   10.52    1.20
  10   1  12   13.33    1.45
 -10  -1 -12   12.64    3.17
 -10   1 -12   11.79    3.60
 -10  -5   2   16.45    2.44
  10  -5  -2   16.03    1.14
  10   5  -2   18.63    1.07
  10  -5  -2   17.47    1.18
  10   5  -2   18.61    1.65
  10  -5   2   40.65    2.18
  10   5   2   40.77    2.00
  10  -5   2   41.92    2.22
   7   1  14    3.80    1.29
  -7  -1 -14    2.04    2.08
[truncated: 110,468 more chars]
