# Supplementary material for: Solid State Structure and Hydrogen Bonding of Some Cyclic NH Carboximides
Source: MDPI journal article supplement (doi:10.3390/cryst13010150), 2023-01-15
Supplement: s1 [file s1 › 12.cif]

data_12
_audit_creation_date                               2020-08-06
_audit_creation_method                            'by CrystalStructure 4.3'

_publ_section_references
;
    ENTER OTHER REFERENCES

    Rigaku (2018). CrystalStructure. Version 4.3. 
    Rigaku Corporation, Tokyo, Japan.

    Sheldrick, G. M. (2014). Acta Cryst. (2014). A70, C1437.
    SHELXT Version 2018/2

    Sheldrick, G.M. (2008) SHELXL Version 2018/3, Acta Cryst. A64, 112-122.

    Rigaku Oxford Diffraction (2015), CrysAlisPro. version 1.171.38.46.
    Rigaku Corporation, Tokyo, Japan

;


_chemical_formula_sum                             'C4 H5 N O3'
_chemical_formula_moiety                          'C4 H5 N O3'
_chemical_formula_weight                           115.09
_chemical_melting_point                            ?

#==============================================================================
# CRYSTAL DATA
_space_group_crystal_system                        triclinic
_space_group_name_H-M_alt                         'P -1'
_space_group_name_Hall                            '-P 1'
_space_group_IT_number                             2
loop_
_space_group_symop_id
_space_group_symop_operation_xyz
1   '+X,+Y,+Z'
2   '-X,-Y,-Z'
#------------------------------------------------------------------------------
_cell_length_a                                     3.92406(12)
_cell_length_b                                     6.67474(18)
_cell_length_c                                     9.7328(3)
_cell_angle_alpha                                  76.716(2)
_cell_angle_beta                                   82.516(2)
_cell_angle_gamma                                  77.665(2)
_cell_volume                                       241.489(13)
_cell_formula_units_Z                              2
_cell_measurement_reflns_used                      5210
_cell_measurement_theta_min                        2.14
_cell_measurement_theta_max                        28.23
_cell_measurement_temperature                      173
#------------------------------------------------------------------------------
_exptl_crystal_description                         prism
_exptl_crystal_colour                              colourless
_exptl_crystal_size_max                            0.150
_exptl_crystal_size_mid                            0.050
_exptl_crystal_size_min                            0.050
_exptl_crystal_density_diffrn                      1.583
_exptl_crystal_density_meas                        ?
_exptl_crystal_density_method                     'not measured'
_exptl_crystal_F_000                               120.00
_exptl_absorpt_coefficient_mu                      0.137
_exptl_absorpt_correction_type                     multi-scan
_exptl_absorpt_process_details
;
CrysAlisPro 1.171.38.46 (Rigaku Oxford Diffraction, 2015)
Empirical absorption correction using spherical harmonics,
 implemented in SCALE3 ABSPACK scaling algorithm.
;
_exptl_absorpt_correction_T_min                    0.894
_exptl_absorpt_correction_T_max                    0.993

#==============================================================================
# EXPERIMENTAL DATA

_diffrn_ambient_temperature                        173
_diffrn_radiation_type                            'Mo K\a'
_diffrn_radiation_wavelength                       0.71073
_diffrn_measurement_device_type                   'Rigaku XtaLAB P200'
_diffrn_measurement_method                         \w
_diffrn_detector_area_resol_mean                   5.811
_diffrn_reflns_number                              7485
_diffrn_reflns_av_unetI/netI                       0.0124
_diffrn_reflns_av_R_equivalents                    0.0254
_diffrn_reflns_theta_max                           28.247
_diffrn_reflns_theta_min                           2.158
_diffrn_reflns_theta_full                          25.242
_diffrn_measured_fraction_theta_max                0.882
_diffrn_measured_fraction_theta_full               0.995
_diffrn_reflns_Laue_measured_fraction_max          0.882
_diffrn_reflns_Laue_measured_fraction_full         0.995
_diffrn_reflns_point_group_measured_fraction_max   0.882
_diffrn_reflns_point_group_measured_fraction_full  0.995
_diffrn_reflns_limit_h_min                        -5
_diffrn_reflns_limit_h_max                         4
_diffrn_reflns_limit_k_min                        -8
_diffrn_reflns_limit_k_max                         8
_diffrn_reflns_limit_l_min                        -12
_diffrn_reflns_limit_l_max                         12
_diffrn_standards_number                           0
_diffrn_standards_interval_count                   .
_diffrn_standards_decay_%                          ?
_reflns_number_total                               1052
_reflns_number_gt                                  965
_reflns_threshold_expression                       F^2^>2.0\s(F^2^)
_reflns_Friedel_coverage          0.000
_reflns_Friedel_fraction_max      .
_reflns_Friedel_fraction_full     .

#==============================================================================
# REFINEMENT DATA

_refine_special_details
;
    Refinement was performed using all reflections. The weighted 
    R-factor (wR) and goodness of fit (S) are based on F^2^.
    R-factor (gt) are based on F. The threshold expression of
    F^2^ > 2.0 sigma(F^2^) is used only for calculating R-factor (gt).
;
_refine_ls_structure_factor_coef                   Fsqd
_refine_ls_R_factor_all                            0.0318
_refine_ls_R_factor_gt                             0.0292
_refine_ls_wR_factor_ref                           0.0853
_refine_ls_wR_factor_gt                            0.0838
_refine_ls_number_restraints                       1
_refine_ls_hydrogen_treatment                      mixed
_refine_ls_number_reflns                           1052
_refine_ls_number_parameters                       77
_refine_ls_goodness_of_fit_ref                     1.076
_refine_ls_weighting_scheme                        calc
_refine_ls_weighting_details
           'w = 1/[\s^2^(Fo^2^)+(0.0491P)^2^+0.0535P] where P=(Fo^2^+2Fc^2^)/3'
_atom_sites_solution_hydrogens                     geom
_atom_sites_solution_primary                       direct
_atom_sites_solution_secondary                     difmap
_refine_ls_shift/su_max                            0.000
_refine_diff_density_max                           0.32
_refine_diff_density_min                          -0.21
_refine_ls_extinction_method                       none
_refine_ls_extinction_coef                         ?

loop_
_atom_type_symbol
_atom_type_description
_atom_type_scat_dispersion_real
_atom_type_scat_dispersion_imag
_atom_type_scat_source
  'C' 'C'  0.0033 0.0016 
;
International Tables for Crystallography
(Vol. C, Tables 4.2.6.8 and 6.1.1.4)
;
  'H' 'H'  0.0000 0.0000 
;
International Tables for Crystallography
(Vol. C, Table 6.1.1.4)
;
  'N' 'N'  0.0061 0.0033 
;
International Tables for Crystallography
(Vol. C, Tables 4.2.6.8 and 6.1.1.4)
;
  'O' 'O'  0.0106 0.0060 
;
International Tables for Crystallography
(Vol. C, Tables 4.2.6.8 and 6.1.1.4)
;

#==============================================================================
# ATOMIC COORDINATES AND THERMAL PARAMETERS

loop_
 _atom_site_label
 _atom_site_type_symbol
 _atom_site_fract_x
 _atom_site_fract_y
 _atom_site_fract_z
 _atom_site_U_iso_or_equiv
 _atom_site_adp_type
 _atom_site_occupancy
 _atom_site_site_symmetry_order  
 _atom_site_calc_flag
 _atom_site_refinement_flags_posn
 _atom_site_refinement_flags_adp
 _atom_site_refinement_flags_occupancy
 _atom_site_disorder_assembly
 _atom_site_disorder_group
O2 O 0.8013(2) 0.26907(12) 0.48031(8) 0.0322(2) Uani 1 1 d . . . . .
O4 O 0.32191(19) 0.36199(12) 0.17804(8) 0.0243(2) Uani 1 1 d . . . . .
O6 O 0.8635(2) -0.12858(12) 0.15822(8) 0.0303(2) Uani 1 1 d . . . . .
N1 N 0.7777(2) 0.05967(13) 0.33000(9) 0.0236(2) Uani 1 1 d D . . . .
C2 C 0.7020(3) 0.24969(16) 0.37136(11) 0.0224(2) Uani 1 1 d . . . . .
C3 C 0.4926(3) 0.43082(16) 0.27414(11) 0.0230(2) Uani 1 1 d . . . . .
H3A H 0.314934 0.513184 0.331877 0.028 Uiso 1 1 calc R U . . .
H3B H 0.650726 0.523981 0.219744 0.028 Uiso 1 1 calc R U . . .
C5 C 0.5618(3) 0.22999(16) 0.09908(11) 0.0238(3) Uani 1 1 d . . . . .
H5A H 0.738244 0.308775 0.042839 0.029 Uiso 1 1 calc R U . . .
H5B H 0.434438 0.187756 0.032346 0.029 Uiso 1 1 calc R U . . .
C6 C 0.7452(3) 0.03607(16) 0.19508(11) 0.0213(2) Uani 1 1 d . . . . .
H1 H 0.909(4) -0.0583(16) 0.3926(13) 0.040(4) Uiso 1 1 d D . . . .

loop_
 _atom_site_aniso_label
 _atom_site_aniso_U_11
 _atom_site_aniso_U_22
 _atom_site_aniso_U_33
 _atom_site_aniso_U_23
 _atom_site_aniso_U_13
 _atom_site_aniso_U_12
O2 0.0487(5) 0.0247(4) 0.0239(4) -0.0087(3) -0.0129(4) 0.0009(3)
O4 0.0226(4) 0.0253(4) 0.0253(4) -0.0092(3) -0.0057(3) 0.0015(3)
O6 0.0414(5) 0.0218(4) 0.0277(4) -0.0095(3) -0.0062(3) 0.0006(3)
N1 0.0344(5) 0.0167(4) 0.0192(5) -0.0025(3) -0.0070(4) -0.0024(3)
C2 0.0274(5) 0.0200(5) 0.0196(5) -0.0047(4) -0.0022(4) -0.0035(4)
C3 0.0263(5) 0.0197(5) 0.0231(5) -0.0067(4) -0.0048(4) -0.0004(4)
C5 0.0278(5) 0.0232(5) 0.0196(5) -0.0060(4) -0.0042(4) 0.0001(4)
C6 0.0236(5) 0.0204(5) 0.0205(5) -0.0049(4) -0.0019(4) -0.0047(4)

#==============================================================================
_computing_data_collection
                                    'CrysAlisPro 1.171.38.46 (Rigaku OD, 2015)'
_computing_cell_refinement
                                    'CrysAlisPro 1.171.38.46 (Rigaku OD, 2015)'
_computing_data_reduction
                                    'CrysAlisPro 1.171.38.46 (Rigaku OD, 2015)'
_computing_structure_solution
                                      'SHELXT Version 2018/2 (Sheldrick, 2014)'
_computing_structure_refinement
                                      'SHELXL Version 2018/3 (Sheldrick, 2008)'
_computing_publication_material
                                          'CrystalStructure 4.3 (Rigaku, 2018)'
_computing_molecular_graphics                     'CrystalStructure 4.3'

#==============================================================================
# MOLECULAR GEOMETRY

_geom_special_details
;
 All esds (except the esd in the dihedral angle between two l.s. planes)
 are estimated using the full covariance matrix.  The cell esds are taken
 into account individually in the estimation of esds in distances, angles
 and torsion angles; correlations between esds in cell parameters are only
 used when they are defined by crystal symmetry.  An approximate (isotropic)
 treatment of cell esds is used for estimating esds involving l.s. planes.
;

loop_
 _geom_bond_atom_site_label_1
 _geom_bond_atom_site_label_2
 _geom_bond_distance
 _geom_bond_site_symmetry_2
 _geom_bond_publ_flag
O2 C2 1.2188(13) . ?
O4 C5 1.4217(12) . ?
O4 C3 1.4236(13) . ?
O6 C6 1.2132(13) . ?
N1 C2 1.3789(13) . ?
N1 C6 1.3831(14) . ?
N1 H1 0.971(5) . ?
C2 C3 1.5115(14) . ?
C3 H3A 0.9900 . ?
C3 H3B 0.9900 . ?
C5 C6 1.5125(14) . ?
C5 H5A 0.9900 . ?
C5 H5B 0.9900 . ?

loop_
 _geom_angle_atom_site_label_1
 _geom_angle_atom_site_label_2
 _geom_angle_atom_site_label_3
 _geom_angle
 _geom_angle_site_symmetry_1
 _geom_angle_site_symmetry_3
 _geom_angle_publ_flag
C5 O4 C3 111.74(8) . . ?
C2 N1 C6 124.06(8) . . ?
C2 N1 H1 117.1(9) . . ?
C6 N1 H1 117.5(9) . . ?
O2 C2 N1 121.30(9) . . ?
O2 C2 C3 122.30(9) . . ?
N1 C2 C3 116.40(9) . . ?
O4 C3 C2 112.12(8) . . ?
O4 C3 H3A 109.2 . . ?
C2 C3 H3A 109.2 . . ?
O4 C3 H3B 109.2 . . ?
C2 C3 H3B 109.2 . . ?
H3A C3 H3B 107.9 . . ?
O4 C5 C6 111.44(8) . . ?
O4 C5 H5A 109.3 . . ?
C6 C5 H5A 109.3 . . ?
O4 C5 H5B 109.3 . . ?
C6 C5 H5B 109.3 . . ?
H5A C5 H5B 108.0 . . ?
O6 C6 N1 121.25(9) . . ?
O6 C6 C5 123.69(9) . . ?
N1 C6 C5 115.05(9) . . ?

loop_
 _geom_torsion_atom_site_label_1
 _geom_torsion_atom_site_label_2
 _geom_torsion_atom_site_label_3
 _geom_torsion_atom_site_label_4
 _geom_torsion
 _geom_torsion_site_symmetry_1
 _geom_torsion_site_symmetry_2
 _geom_torsion_site_symmetry_3
 _geom_torsion_site_symmetry_4
 _geom_torsion_publ_flag
C6 N1 C2 O2 -164.64(10) . . . . ?
C6 N1 C2 C3 15.04(15) . . . . ?
C5 O4 C3 C2 -54.67(11) . . . . ?
O2 C2 C3 O4 -163.06(10) . . . . ?
N1 C2 C3 O4 17.27(13) . . . . ?
C3 O4 C5 C6 60.11(11) . . . . ?
C2 N1 C6 O6 168.88(10) . . . . ?
C2 N1 C6 C5 -9.74(15) . . . . ?
O4 C5 C6 O6 153.85(10) . . . . ?
O4 C5 C6 N1 -27.56(12) . . . . ?

loop_
_geom_hbond_atom_site_label_D
_geom_hbond_atom_site_label_H
_geom_hbond_atom_site_label_A
_geom_hbond_site_symmetry_D
_geom_hbond_site_symmetry_H
_geom_hbond_site_symmetry_A
_geom_hbond_distance_DA
_geom_hbond_distance_DH
_geom_hbond_distance_HA
_geom_hbond_angle_DHA
_geom_hbond_publ_flag
N1 H1 O2 . . 2_756 2.8872(11) 0.971(11) 1.920(11) 173.3(13) no

#==============================================================================
# Additional structures and associated data_? identifiers
# should be added at this point if there is more than one 
# structure analysis in the CIF.

_shelx_res_file
;
TITL dsaa7
    shelxl.res
    created by SHELXL-2018/3 at 22:04:42 on 06-Aug-2020
CELL  0.71073 3.92406 6.67474 9.73280 76.71600 82.51600 77.66500
ZERR  2 0.00012 0.00018 0.00030 0.00200 0.00200 0.00200
LATT 1
SFAC C H N O
UNIT 8 10 2 6
L.S. 20
FMAP 2
PLAN 3
WPDB -2
HTAB
BOND $H
CONF
LIST 4
TEMP -100.0
ACTA
SIZE 0.150 0.050 0.050
DFIX 0.9800 0.0050 N1 H1
WGHT    0.049100    0.053500
FVAR       1.58511
O2    4    0.801331    0.269073    0.480311    11.00000    0.04875    0.02469 =
         0.02392   -0.00869   -0.01293    0.00092
O4    4    0.321914    0.361987    0.178044    11.00000    0.02257    0.02529 =
         0.02535   -0.00921   -0.00567    0.00147
O6    4    0.863525   -0.128582    0.158221    11.00000    0.04144    0.02184 =
         0.02771   -0.00949   -0.00621    0.00065
N1    3    0.777710    0.059672    0.330004    11.00000    0.03435    0.01670 =
         0.01924   -0.00252   -0.00700   -0.00235
C2    1    0.702030    0.249688    0.371356    11.00000    0.02741    0.02003 =
         0.01958   -0.00469   -0.00216   -0.00352
C3    1    0.492579    0.430819    0.274144    11.00000    0.02634    0.01967 =
         0.02313   -0.00665   -0.00480   -0.00036
AFIX  23
H3A   2    0.314934    0.513184    0.331877    11.00000   -1.20000
H3B   2    0.650726    0.523981    0.219744    11.00000   -1.20000
AFIX   0
C5    1    0.561807    0.229989    0.099084    11.00000    0.02776    0.02316 =
         0.01959   -0.00602   -0.00421    0.00011
AFIX  23
H5A   2    0.738244    0.308775    0.042839    11.00000   -1.20000
H5B   2    0.434438    0.187756    0.032346    11.00000   -1.20000
AFIX   0
C6    1    0.745193    0.036070    0.195079    11.00000    0.02363    0.02038 =
         0.02052   -0.00495   -0.00194   -0.00473
H1    2    0.908651   -0.058318    0.392555    11.00000    0.03961
HKLF 4


REM  dsaa7
REM wR2 = 0.0853, GooF = S = 1.076, Restrained GooF = 1.077 for all data
REM R1 = 0.0292 for 965 Fo > 4sig(Fo) and 0.0318 for all 1052 data
REM 77 parameters refined using 1 restraints

END

WGHT      0.0452      0.0586

REM Instructions for potential hydrogen bonds
EQIV $1 -x+1, -y+1, -z+1
HTAB C3 O2_$1
EQIV $2 x, y+1, z
HTAB C3 O6_$2
EQIV $3 -x+1, -y, -z
HTAB C5 O6_$3
EQIV $4 -x+2, -y, -z+1
HTAB N1 O2_$4

REM Highest difference peak  0.323,  deepest hole -0.208,  1-sigma level  0.039
Q1    1   0.5914  0.3377  0.3194  11.00000  0.05    0.32
Q2    1   0.6477  0.1350  0.1460  11.00000  0.05    0.30
Q3    1   0.7667  0.1592  0.3401  11.00000  0.05    0.17
;

_shelx_res_checksum   50591

_shelx_hkl_file
;
   0   0   1    5.85    0.49
   0   0  -1    6.47    0.20
   0   0  -1    6.26    0.46
   0   0   1    6.86    0.20
   0   0   1    6.79    0.20
   0   0   1    6.74    0.53
   0   0  -1    6.28    0.48
   0  -1   0  305.54    7.27
   0   1   0  294.88    7.30
   0  -1   0  310.13    7.30
   0   1   0  310.57    7.33
   0   1   0  290.36    7.26
   0  -1   0  297.16    7.23
   0  -1   0  302.65    7.51
   0   1   0  320.29    7.50
   0  -1   0  301.15    7.37
   0   1   0  301.21    7.29
   0   1   0  309.81    7.40
   0  -1   0  287.05    7.29
   0  -1   0  346.02    7.42
   0  -1  -1 1431.53   33.43
   0   1   1 1413.07   33.50
   0   1   1 1415.19   33.50
   0   1   1 1419.71   33.45
   0   1   1 1425.97   33.55
   0   1   1 1397.83   33.43
   0  -1  -1 1300.32   33.52
   0  -1  -1 1419.38   33.52
   0   1   1 1332.81   33.46
   0  -1  -1 1421.54   33.48
   0   1   1 1407.39   33.54
   0  -1  -1 1414.97   33.58
   0  -1  -1 1387.38   33.53
   0  -1  -1 1432.59   33.49
   0  -1   1 2067.11   48.04
   0   1  -1 1956.08   47.55
   0  -1   1 1953.19   47.93
   0  -1   1 1994.66   47.77
   0   1  -1 2073.03   47.73
   0  -1   1 1989.52   47.67
   0   1  -1 1930.44   47.88
   0  -1   1 1986.73   47.54
   0  -1   1 1984.07   47.55
   0  -1   1 2013.73   47.48
   0   1  -1 2013.87   47.93
   0  -1   1 1987.68   47.58
   0   0   2  998.85   24.69
   0   0  -2 1078.06   25.23
   0   0   2 1136.89   24.69
   0   0   2 1050.92   25.14
   0   0   2 1059.95   24.78
   0   0  -2  961.95   24.69
   0   0  -2 1002.64   25.13
   0   0   2 1029.87   25.15
   0   1   2   54.11    1.43
   0   1   2   55.94    1.60
   0   1   2   57.89    1.78
   0  -1  -2   51.45    1.63
   0   1   2   54.78    1.69
   0  -1  -2   57.66    1.45
   0   1   2   55.03    1.52
   0   1   2   56.65    1.51
   0   1   2   58.51    1.45
   0  -1  -2   53.39    1.82
   0  -1  -2   54.69    1.37
  -1   0   0  399.07    9.54
   1   0   0  406.26    9.64
   1   0   0  398.13    9.54
   1   0   0  395.75    9.49
   1   0   0  404.42    9.52
   1   0   0  399.61    9.52
   1   0   0  391.64    9.51
  -1   0   0  380.52    9.49
  -1   0   0  401.13    9.52
   1   0   0  386.27    9.46
   1   0   1  651.60   15.74
  -1   0  -1  623.30   15.72
  -1   0  -1  653.36   15.70
   1   0   1  674.57   15.72
   1   0   1  651.55   15.69
   1   0   1  660.01   15.67
   1   0   1  668.72   15.66
   1   0   1  646.66   15.72
   1   1   1 1647.13   38.08
   1   1   1 1573.99   38.07
   1   1   1 1667.12   38.02
   1   1   1 1612.06   38.07
  -1  -1  -1 1580.75   38.08
  -1  -1  -1 1499.70   38.11
   1   1   1 1582.50   38.05
   1   1   1 1639.53   38.07
  -1  -1  -1 1571.03   38.06
  -1  -1  -1 1566.90   38.08
   1   1   1 1528.42   38.11
   1   1   0 2512.69   58.91
  -1  -1   0 2506.97   58.90
  -1  -1   0 2434.79   59.05
   1   1   0 2545.55   58.89
   1   1   0 2521.32   58.87
  -1  -1   0 2529.84   58.89
   1   1   0 2534.52   58.87
   1   1   0 2571.60   59.12
   1   1   0 2395.26   58.88
  -1  -1   0 2468.94   58.96
  -1  -1   0 2549.41   58.83
   1   1   0 2472.45   58.99
   1   1   0 2413.15   58.90
   0   1  -2  158.13    3.86
   0  -1   2  159.17    4.44
   0  -1   2  135.04    4.28
   0   1  -2  160.02    4.53
   0  -1   2  154.36    3.94
   0  -1   2  160.28    3.78
   0   1  -2  158.93    4.29
   0  -1   2  155.43    3.85
   0   1  -2  155.80    3.78
   0   1  -2  149.11    3.97
  -1   0   1 2406.85   57.98
  -1   0   1 2301.81   57.94
   1   0  -1 2452.92   58.04
   1   0  -1 2411.36   57.97
  -1   0   1 2410.95   58.01
   1   0  -1 2408.99   57.94
  -1   0   1 2576.85   57.92
   1   0  -1 2428.45   58.22
  -1   0   1 2415.73   57.99
  -1   0   1 2486.03   58.14
   1   0  -1 2394.94   58.32
   0  -2  -1 1198.36   29.53
   0   2   1 1227.71   29.66
   0   2   1 1270.41   29.71
   0  -2  -1 1252.62   29.51
   0  -2  -1 1233.62   29.53
   0   2   1 1243.29   29.57
   0   2   1 1250.20   29.57
   0  -2  -1 1226.06   29.62
   0  -2  -1 1229.97   29.67
   0  -2  -1 1219.45   29.42
   0  -2  -1 1224.45   29.45
   0   2   0  192.54    4.85
   0  -2   0  202.72    4.86
   0   2   0  215.29    4.94
   0  -2   0  176.75    5.30
   0  -2   0  195.34    4.89
   0   2   0  189.28    5.06
   0   2   0  199.43    5.17
   0  -2   0  194.01    4.81
   0  -2   0  196.41    4.72
   0   2   0  181.64    4.72
   0  -2   0  206.10    5.04
   1   1   2 1402.51   33.35
   1   1   2 1391.95   33.29
   1   1   2 1409.73   33.32
  -1  -1  -2 1380.56   33.24
   1   1   2 1437.92   33.39
   1   1   2 1364.85   33.25
   1   1   2 1433.47   33.28
  -1  -1  -2 1438.65   33.52
   1   1   2 1414.16   33.43
   1   1   2 1339.59   33.26
  -1  -1   1 9844.06  234.11
   1   1  -1 9811.71  234.58
   1   1  -1 9866.55  234.08
   1   1  -1 9817.35  234.30
  -1  -1   1 9999.00  234.51
  -1  -1   1 9897.63  234.39
  -1  -1   1 9907.72  234.21
   1   1  -1 9870.10  234.09
  -1  -1   1 9692.04  234.11
   0   0  -3 1133.83   29.86
   0   0  -3 1206.16   29.40
   0   0   3 1187.26   29.76
   0   0   3 1226.91   29.10
   0   0   3 1231.85   29.20
   0   0   3 1251.91   29.10
   0   0  -3 1175.34   29.77
   0   0  -3 1244.89   29.10
   0   0   3 1184.90   29.07
   0   0   3 1220.88   29.76
   1   0   2    5.94    0.38
   1   0   2    5.07    0.31
   1   0   2    5.64    0.28
   1   0   2    5.41    0.73
   1   0   2    5.14    0.29
   1   0   2    5.15    0.50
   1   0   2    5.87    0.27
   1   0   2    5.87    0.37
  -1   0  -2    5.13    0.28
  -1   0  -2    6.07    0.47
   1   0   2    5.80    0.28
   0  -1  -3  268.71    7.77
   0   1   3  288.61    7.27
   0   1   3  299.40    7.21
   0  -1  -3  296.20    7.25
   0   1   3  283.75    7.67
   0   1   3  300.74    7.11
   0  -1  -3  297.92    7.12
   0   1   3  282.05    7.47
   0   1   3  290.90    7.62
   0   1   3  294.18    7.22
   0   1   3  302.73    7.18
  -1   1   0   63.90    1.76
   1  -1   0   64.07    1.67
   1  -1   0   67.54    1.84
   1  -1   0   67.54    1.70
  -1   1   0   60.81    1.64
   1  -1   0   69.99    1.82
   1  -1   0   67.19    1.64
   1  -1   0   71.46    1.82
   1  -1   0   68.61    1.79
  -1   1   0   68.65    1.79
   1  -1   0   68.68    1.76
  -1   1   0   71.38    1.78
   0  -2  -2  240.45    5.86
   0   2   2  241.38    6.07
   0  -2  -2  236.29    5.97
   0  -2  -2  232.69    6.04
   0  -2  -2  250.00    5.98
   0  -2  -2  241.13    6.07
   0   2   2  237.08    6.07
   0   2   2  233.69    5.86
   0   2   2  249.99    6.02
   0  -2  -2  230.65    6.18
   0   2   2  236.83    5.85
  -1   1   1  327.98    7.94
  -1   1   1  326.53    7.76
   1  -1  -1  327.72    7.90
   1  -1  -1  326.28    8.06
   1  -1  -1  318.27    8.11
  -1   1   1  323.33    7.81
  -1   1   1  291.74    7.80
   1  -1  -1  322.21    7.75
   1  -1  -1  319.09    7.81
  -1   1   1  328.59    7.87
  -1   1   1  335.28    7.85
  -1   1   1  333.36    7.89
   1  -1   1 2433.62   57.55
   1  -1   1 2476.19   57.45
  -1   1  -1 2453.91   57.51
   1  -1   1 2270.30   57.39
  -1   1  -1 2470.19   57.53
   1  -1   1 2435.63   57.55
   1  -1   1 2485.25   57.60
  -1   1  -1 2431.78   57.43
   1  -1   1 2466.27   57.44
  -1   1  -1 2407.80   57.57
   1  -1   1 2445.45   57.59
  -1   1  -1 2459.99   57.46
   1   0  -2  696.72   16.67
   1   0  -2  700.32   16.67
  -1   0   2  670.46   16.67
   1   0  -2  688.03   17.27
   1   0  -2  678.26   16.71
  -1   0   2  732.77   16.75
  -1   0   2  699.48   17.11
   1   0  -2  658.01   17.20
  -1   0   2  702.07   16.70
  -1   0   2  712.65   16.70
   0  -2   1  291.04    7.37
   0  -2   1  294.10    7.98
   0  -2   1  301.28    7.36
   0  -2   1  316.61    7.61
   0  -2   1  295.50    7.24
   0   2  -1  299.32    7.22
   0  -2   1  292.56    8.04
   0   2  -1  319.95    7.42
   0   2  -1  305.10    7.92
   0   2  -1  306.50    7.40
   0   2  -1  310.99    7.24
   0   2  -1  288.25    7.65
   0  -2   1  298.69    7.43
   1   2   1  227.75    6.22
  -1  -2  -1  256.92    6.28
   1   2   1  264.61    6.26
  -1  -2  -1  257.22    6.32
   1   2   1  268.40    6.35
   1   2   1  253.81    6.49
  -1  -2  -1  265.53    6.26
   1   2   1  268.15    6.29
  -1  -2  -1  248.52    6.34
   1   2   1  259.33    6.29
   1   2   0  263.37    6.45
  -1  -2   0  267.05    6.48
  -1  -2   0  277.47    6.44
   1   2   0  283.05    6.57
  -1  -2   0  265.17    6.48
  -1  -2   0  271.51    6.45
   1   2   0  258.35    6.43
  -1  -2   0  264.13    6.46
   1   2   0  251.83    6.52
   1   2   0  255.08    6.76
   1   2   0  247.25    6.42
  -1  -2   0  276.87    6.83
  -1  -2  -2   58.78    1.65
   1   2   2   55.92    1.58
   1   2   2   56.89    1.62
  -1  -2  -2   55.60    1.53
   1   2   2   58.22    1.65
   1   2   2   55.17    1.69
   1   2   2   57.22    1.59
  -1  -2  -2   56.41    1.56
  -1  -2  -2   58.69    1.57
   1   2   2   59.67    1.65
   1   2   2   58.87    1.61
  -1  -2  -2   57.19    1.76
  -1  -1  -3  162.17    4.43
   1   1   3  155.45    3.88
   1   1   3  167.50    4.35
   1   1   3  172.00    4.08
   1   1   3  162.89    3.93
  -1  -1  -3  162.38    3.87
   1   1   3  160.34    4.06
  -1  -1  -3  159.61    3.89
  -1  -1  -3  157.02    4.17
   1   1   3  158.10    3.95
   1   1   3  172.08    4.28
   1   1   3  142.66    3.85
   1   1  -2  549.46   13.05
  -1  -1   2  578.25   13.06
  -1  -1   2  562.86   13.64
   1   1  -2  585.73   13.88
  -1  -1   2  489.11   13.65
  -1  -1   2  518.71   13.08
   1   1  -2  554.71   13.53
   1   1  -2  566.48   13.10
  -1  -1   2  559.12   13.21
  -1  -1   2  556.13   13.06
   1   1  -2  472.05   13.04
   1   1  -2  558.15   13.08
   1   1  -2  557.90   13.05
   0  -1   3  248.76    5.87
   0   1  -3  241.37    5.92
   0   1  -3  213.93    6.04
   0  -1   3  241.29    6.00
   0  -1   3  237.31    6.63
   0  -1   3  254.56    6.02
   0  -1   3  249.11    6.85
   0  -1   3  252.12    5.92
   0  -1   3  232.93    6.40
   0   1  -3  241.91    6.67
   0   1  -3  235.73    6.57
  -1   1   2 1112.58   26.88
   1  -1  -2 1114.30   26.59
   1  -1  -2 1130.77   27.06
  -1   1   2 1078.74   26.59
   1  -1  -2 1121.08   26.53
   1  -1  -2 1047.30   27.00
  -1   1   2 1098.91   26.65
  -1   1   2 1127.18   26.62
   1  -1  -2 1118.98   26.63
  -1   1   2 1113.19   26.58
  -1   1   2 1148.61   26.93
   1   0   3   24.83    0.72
   1   0   3   22.98    0.70
   1   0   3   24.05    0.91
  -1   0  -3   28.32    0.90
   1   0   3   25.13    0.73
   1   0   3   23.43    1.27
   1   0   3   23.44    0.80
   1   0   3   25.20    0.74
   1   0   3   25.49    1.05
   1   0   3   23.92    1.21
   0   2   3  180.62    4.82
   0   2   3  186.42    4.95
   0  -2  -3  182.56    4.58
   0  -2  -3  190.93    4.64
   0  -2  -3  184.29    4.84
   0   2   3  189.36    4.59
   0  -2  -3  160.21    4.90
   0   2   3  187.64    4.45
   0   2   3  189.15    4.73
   0   2   3  180.12    4.72
   0  -2  -3  169.73    4.68
   0  -2  -3  171.02    5.06
   1  -1   2 2597.90   61.62
  -1   1  -2 2549.74   61.33
  -1   1  -2 2477.96   61.44
   1  -1   2 2581.32   61.35
   1  -1   2 2624.65   61.41
   1  -1   2 2610.52   61.57
   1  -1   2 2606.42   61.49
   1  -1   2 2540.40   61.43
   1  -1   2 2572.94   61.45
   1  -1   2 2600.11   61.32
  -1   1  -2 2574.23   61.39
   1   2  -1   53.05    1.79
  -1  -2   1   50.04    1.34
   1   2  -1   50.26    1.39
  -1  -2   1   51.37    1.64
   1   2  -1   49.02    1.33
  -1  -2   1   51.59    1.34
  -1  -2   1   48.53    1.40
  -1  -2   1   52.07    1.42
  -1  -2   1   49.09    1.35
  -1  -2   1   53.94    2.11
   1   2  -1   47.29    1.82
   1   2  -1   52.28    1.38
   0   2  -2 3981.39   96.42
   0   2  -2 4264.82   96.03
   0  -2   2 3992.46   96.69
   0   2  -2 4067.24   96.15
   0   2  -2 4232.67   96.76
   0  -2   2 3947.41   96.87
   0  -2   2 3833.57   97.08
   0  -2   2 4164.49   96.24
   0   2  -2 3955.36   96.83
   0  -2   2 3812.21   96.02
   0  -2   2 3981.59   96.11
   0  -2   2 3985.87   96.35
   0  -2   2 4056.07   96.17
   0  -1  -4  601.93   13.85
   0   1   4  523.98   14.16
   0   1   4  601.79   13.71
   0  -1  -4  538.57   14.63
   0   1   4  576.15   14.44
   0  -1  -4  586.99   13.81
   0   1   4  570.22   13.88
   0  -1  -4  503.83   13.82
   0   1   4  557.54   13.69
   0   1   4  595.18   13.85
   0   1   4  587.62   13.82
   0   1   4  580.23   14.54
   0   0   4  165.21    5.16
   0   0   4  175.34    4.31
   0   0   4  167.26    5.19
   0   0  -4  162.67    4.73
   0   0  -4  147.90    5.14
   0   0  -4  179.98    4.33
   0   0   4  173.57    4.26
   0   0   4  176.22    4.31
   0   0   4  184.29    4.45
  -1  -2  -3    0.07    0.41
   1   2   3    0.14    0.22
   1   2   3    0.55    0.50
   1   2   3    0.24    0.26
   1   2   3   -0.23    0.31
  -1  -2  -3    0.03    0.71
   1   2   3    0.21    0.35
   1   2   3    0.17    0.30
  -1  -2  -3    0.11    0.18
  -1  -2  -3   -0.25    0.51
   1   2   3    0.13    0.25
   1   2   3    0.21    0.43
  -1  -2  -3    0.13    0.21
   1   0  -3  542.40   14.67
   1   0  -3  569.20   14.01
  -1   0   3  598.39   14.04
   1   0  -3  550.25   14.80
   1   0  -3  559.99   13.96
   1   0  -3  569.34   13.94
   1   0  -3  576.13   14.10
  -1   0   3  588.97   13.98
  -1   0   3  579.27   14.63
  -1   0   3  603.93   14.00
  -1   0   3  602.76   13.98
   1  -2   0   64.85    1.89
   1  -2   0   66.42    1.97
   1  -2   0   64.09    1.64
  -1   2   0   66.07    1.89
   1  -2   0   65.60    1.72
   1  -2   0   63.60    1.93
  -1   2   0   67.38    1.71
  -1   2   0   68.20    1.72
  -1   2   0   66.46    1.63
   1  -2   0   67.04    2.04
   1  -2   0   66.41    1.77
  -1   2   0   66.15    1.86
  -1   2   0   65.88    1.79
   1  -2  -1    0.85    0.45
  -1   2   1    0.59    0.13
  -1   2   1    0.37    0.19
   1  -2  -1    0.46    0.16
  -1   2   1    0.76    0.31
  -1   2   1    0.47    0.27
   1  -2  -1    0.38    0.31
   1  -2  -1    0.64    0.24
  -1   2   1    0.11    0.43
  -1   2   1    0.86    0.32
   1  -2  -1    0.25    0.41
   1  -1  -3   41.11    1.18
  -1   1   3   41.25    1.13
  -1   1   3   40.67    1.19
   1  -1  -3   41.31    1.27
  -1   1   3   40.72    1.65
  -1   1   3   40.41    1.17
   1  -1  -3   40.55    1.19
  -1   1   3   40.89    1.61
   1  -1  -3   38.32    1.13
  -1   1   3   42.55    1.24
   1  -1  -3   42.45    1.88
   1  -1  -3   42.01    1.20
   1  -1  -3   39.01    1.85
   1   1   4    7.59    0.37
   1   1   4    7.25    0.33
   1   1   4    8.47    0.41
  -1  -1  -4    7.77    0.82
  -1  -1  -4    7.90    0.43
   1   1   4    8.10    0.63
   1   1   4    8.21    1.05
  -1  -1  -4    7.52    1.09
  -1  -1  -4    7.66    0.34
   1   1   4    7.63    0.31
   1   1   4    7.20    0.95
   1   1   4    8.48    0.30
   0   3   1  289.56    6.77
   0   3   1  282.22    6.93
   0  -3  -1  274.66    6.92
   0  -3  -1  243.05    7.05
   0  -3  -1  282.21    6.82
   0  -3  -1  276.57    7.02
   0  -3  -1  271.23    7.12
   0   3   1  284.34    7.21
   0  -3  -1  267.14    7.49
   0   3   1  275.68    7.08
   0  -3  -1  267.25    6.92
   0  -3  -1  275.39    6.75
   1   1  -3   98.01    3.46
  -1  -1   3   94.92    2.38
   1   1  -3   97.84    2.41
   1   1  -3   82.58    2.70
   1   1  -3   93.24    2.36
  -1  -1   3   94.90    3.16
  -1  -1   3   98.19    2.58
   1   1  -3   94.18    3.04
  -1  -1   3   95.94    2.39
  -1  -1   3   92.30    2.35
  -1  -1   3   89.26    2.41
   1   1  -3   91.54    2.37
  -1   1  -3  773.84   18.74
  -1   1  -3  765.52   18.56
  -1   1  -3  785.95   18.53
   1  -1   3  757.30   18.61
   1  -1   3  754.86   18.48
   1  -1   3  816.42   19.12
   1  -1   3  789.63   18.49
   1  -1   3  777.42   18.98
  -1   1  -3  765.74   18.47
   1  -1   3  761.66   18.99
   1  -1   3  736.40   18.78
   1  -1   3  765.11   18.56
   1  -1   3  773.75   18.41
  -1  -2   2  753.69   18.14
   1   2  -2  746.96   18.12
  -1  -2   2  779.36   18.75
   1   2  -2  774.21   18.90
   1   2  -2  747.56   18.31
   1   2  -2  742.15   18.76
   1   2  -2  750.85   18.14
  -1  -2   2  771.44   18.20
  -1  -2   2  785.19   18.14
  -1  -2   2  752.66   18.46
   1   2  -2  754.27   18.18
   1   2  -2  740.22   18.11
  -1  -2   2  776.91   18.23
  -1  -2   2  744.93   18.11
  -1  -2   2  785.31   19.06
   1  -2   1  412.33   10.22
   1  -2   1  403.30    9.88
   1  -2   1  410.30   10.06
  -1   2  -1  417.43   10.02
   1  -2   1  430.98   10.22
   1  -2   1  386.46   10.20
  -1   2  -1  415.56    9.90
  -1   2  -1  418.76    9.88
   1  -2   1  420.04   10.10
   1  -2   1  399.04    9.93
  -1   2  -1  422.80   10.07
  -1   2  -1  394.34   10.01
   0  -3   0  114.83    2.90
   0   3   0  131.36    3.19
   0  -3   0  116.88    3.09
   0   3   0  108.85    3.05
   0   3   0  119.25    2.90
   0   3   0  119.92    3.41
   0   3   0  119.02    3.15
   0   3   0  116.33    3.45
   0  -3   0  117.89    3.50
   0  -3   0  113.43    3.06
   0  -3   0  101.24    3.16
   0   3   0  114.25    2.84
   0  -3   0  110.74    3.29
   0   2   4  534.94   12.68
   0  -2  -4  522.60   12.70
   0  -2  -4  521.40   12.74
   0  -2  -4  529.39   12.67
   0   2   4  509.50   12.79
   0  -2  -4  456.58   13.42
   0   2   4  520.31   13.15
   0   2   4  520.81   13.02
   0   2   4  521.03   12.71
   0   2   4  510.12   12.62
   0  -2  -4  502.93   13.29
   0  -2  -4  530.72   12.50
   0   3   2    7.71    0.42
   0  -3  -2    7.51    0.42
   0   3   2    9.19    0.65
   0  -3  -2    8.71    0.61
   0  -3  -2    7.99    0.54
   0  -3  -2    8.05    1.06
   0   3   2    8.79    0.55
   0  -3  -2    8.37    0.60
   0   3   2    8.78    0.77
   0  -3  -2    6.36    0.70
   0  -3  -2    8.81    0.51
   0   3   2    8.36    0.65
   1  -2  -2  422.46   10.61
  -1   2   2  434.51   10.50
   1  -2  -2  426.05   10.45
   1  -2  -2  417.56   10.37
   1  -2  -2  400.67   10.85
  -1   2   2  429.15   10.50
  -1   2   2  434.79   10.69
   1  -2  -2  417.89   10.49
   1  -2  -2  426.24   10.88
   1  -2  -2  407.70   10.62
   1  -2  -2  438.96   10.47
  -1   2   2  419.48   10.56
  -1   2   2  453.19   10.36
  -1   2   2  455.63   10.53
   1   3   1   19.39    1.05
   1   3   1   17.37    1.32
  -1  -3  -1   18.05    0.75
   1   3   1   18.72    0.88
   1   3   1   18.29    0.74
   1   3   1   18.90    0.64
   1   3   1   18.55    0.69
  -1  -3  -1   19.36    0.95
  -1  -3  -1   19.55    0.71
  -1  -3  -1   19.58    0.83
   1   3   1   19.48    0.75
  -1  -3  -1   18.93    0.83
   1   0   4    0.47    0.47
   1   0   4    0.28    0.18
   1   0   4    0.68    0.94
   1   0   4    0.15    0.20
  -1   0  -4    0.22    0.56
  -1   0  -4    0.20    0.16
  -1   0  -4    0.21    0.39
   1   0   4    0.50    0.93
   1   0   4    0.24    1.04
   1   0   4    0.15    0.19
   1   0   4    0.55    0.44
   1   0   4    0.07    0.14
  -1   0  -4   -0.31    0.81
   1   0   4    0.21    0.15
   0  -1   4  212.97    5.28
   0  -1   4  215.79    6.43
   0  -1   4  217.94    5.36
   0   1  -4  210.10    6.05
   0  -1   4  228.72    5.33
   0  -1   4  215.20    5.43
   0  -1   4  209.38    6.24
   0  -1   4  203.02    5.80
   0   1  -4  222.76    6.34
   0   1  -4  227.60    5.35
   0   1  -4  217.82    5.43
   0   1  -4  216.26    5.29
   1   3   2  731.41   18.20
  -1  -3  -2  749.26   18.22
  -1  -3  -2  730.25   18.27
   1   3   2  761.81   18.11
   1   3   2  727.15   18.32
   1   3   2  717.60   18.65
   1   3   2  746.57   18.23
  -1  -3  -2  764.15   18.37
  -1  -3  -2  739.75   18.13
  -1  -2  -4  713.80   17.05
  -1  -2  -4  711.44   17.76
   1   2   4  729.14   17.23
   1   2   4  733.18   17.26
  -1  -2  -4  681.03   17.49
   1   2   4  709.09   17.37
   1   2   4  716.58   17.12
   1   2   4  696.29   17.46
  -1  -2  -4  701.39   17.39
  -1  -2  -4  704.21   16.97
   1   2   4  692.29   17.05
   1   2   4  672.99   17.00
   1   2   4  757.32   17.10
   0  -2   3  335.25    9.54
   0  -2   3  357.96    8.97
   0  -2   3  368.25    9.06
   0  -2   3  366.66    8.76
   0   2  -3  356.10    8.75
   0   2  -3  363.01    9.38
   0   2  -3  357.50    9.12
   0   2  -3  367.29    8.78
   0  -2   3  372.19    8.75
   0   2  -3  350.45    9.65
   0  -2   3  367.75    8.90
   0  -2   3  361.24    9.74
   1   3   0  550.23   13.04
   1   3   0  544.17   13.13
  -1  -3   0  576.40   13.55
  -1  -3   0  533.57   13.20
   1   3   0  571.67   13.97
  -1  -3   0  569.28   13.12
  -1  -3   0  528.14   13.18
   1   3   0  497.24   13.34
   1   3   0  542.13   13.07
   1   3   0  514.43   13.88
   1   3   0  539.34   13.19
   1   3   0  528.00   13.13
   0   3  -1    0.66    0.15
   0  -3   1    1.08    0.30
   0   3  -1    1.73    0.80
   0   3  -1    0.63    0.52
   0   3  -1    0.66    0.11
   0  -3   1   -0.20    0.34
   0  -3   1    0.35    1.20
   0  -3   1   -0.05    0.54
   0   3  -1    0.53    0.39
   0   3  -1    0.90    0.36
   0  -3   1    0.57    0.39
   0   3   3  649.31   15.77
   0  -3  -3  677.68   16.09
   0  -3  -3  574.17   16.33
   0  -3  -3  687.99   16.26
   0   3   3  664.98   15.86
   0   3   3  696.97   16.15
   0  -3  -3  649.33   16.16
   0   3   3  631.23   15.77
   0  -3  -3  658.42   16.19
   0  -3  -3  644.89   15.94
   0  -3  -3  664.62   16.04
   0   3   3  657.18   16.09
   0  -3  -3  679.05   15.82
   0   3   3  627.33   16.03
   1  -2   2  321.72    7.77
   1  -2   2  326.80    8.18
  -1   2  -2  315.39    8.01
  -1   2  -2  326.80    7.76
   1  -2   2  319.44    8.33
  -1   2  -2  324.64    7.84
  -1   2  -2  316.84    7.94
  -1   2  -2  322.12    7.91
   1  -2   2  323.72    7.96
   1  -2   2  325.65    8.01
   1  -2   2  311.33    8.27
   1  -2   2  323.01    7.86
   2   1   1   38.18    1.17
   2   1   1   39.24    1.27
   2   1   1   38.52    1.32
  -2  -1  -1   40.19    1.20
   2   1   1   38.56    1.16
  -2  -1  -1   39.55    1.18
   2   1   1   40.60    1.06
   2   1   1   43.40    1.22
   2   1   1   39.32    1.12
  -1   0   4    7.30    0.35
  -1   0   4    8.27    0.47
   1   0  -4    5.38    1.10
   1   0  -4    7.35    0.57
   1   0  -4    7.57    0.31
   1   0  -4    7.72    0.40
   1   0  -4    6.22    1.29
  -1   0   4    8.22    1.21
  -1   0   4    6.54    1.13
   1   0  -4    6.76    0.36
   1   0  -4    7.56    0.42
  -1   0   4    7.08    0.36
  -1   0   4    7.80    0.38
   1   0  -4    7.89    0.31
  -1  -3  -3  495.80   11.66
   1   3   3  483.81   11.99
  -1  -3  -3  470.38   11.54
  -1  -3  -3  472.16   11.94
  -1  -3  -3  494.98   11.53
   1   3   3  471.13   11.64
  -1  -3  -3  459.02   11.53
   1   3   3  473.11   11.72
  -1  -3  -3  494.64   11.75
   1   3   3  446.78   11.52
   1   3   3  482.52   11.66
   1   3   3  453.27   11.68
   2   1   0  322.72    7.67
  -2  -1   0  328.14    7.82
  -2  -1   0  345.08    7.95
   2   1   0  329.14    8.19
  -2  -1   0  340.58    7.74
  -2  -1   0  316.90    7.84
   2   1   0  308.96    7.94
   2   1   0  305.79    7.74
   2   1   0  315.52    7.79
   0   1   5   -0.05    1.10
   0  -1  -5    0.33    0.42
   0   1   5    0.79    0.22
   0   1   5    0.48    0.21
   0   1   5    0.79    0.29
   0   1   5    0.47    1.00
   0  -1  -5    0.42    0.26
   0  -1  -5    0.82    0.28
   0  -1  -5    0.44    1.16
   0   1   5    0.58    0.13
  -1   2   3  854.81   20.17
   1  -2  -3  829.32   19.70
   1  -2  -3  800.77   19.74
  -1   2   3  805.51   19.74
  -1   2   3  803.60   20.07
   1  -2  -3  815.35   19.92
  -1   2   3  809.46   19.89
   1  -2  -3  738.92   20.28
  -1   2   3  830.13   19.86
  -1   2   3  846.21   19.77
  -1   2   3  804.08   19.91
   1  -2  -3  825.23   19.68
   1  -2  -3  819.73   19.75
  -1   2   3  838.28   19.67
   1  -2  -3  802.02   20.32
   2   0   0  923.41   22.02
   2   0   0  928.87   21.72
   2   0   0  925.79   21.80
   2   0   0  878.76   21.60
  -2   0   0  907.74   21.65
   2   0   0  899.59   21.77
   2   0   0  894.24   21.68
  -2   0   0  910.02   21.75
   2   0   0  905.90   21.75
  -2   0   0  883.82   21.77
   2   0   1  929.58   22.05
   2   0   1  920.71   21.93
  -2   0  -1  924.94   22.07
   2   0   1  893.72   22.10
   2   0   1  895.72   21.98
   2   0   1  959.39   22.24
   2   0   1  909.09   21.95
   2   0   1  896.78   22.05
  -2   0  -1  930.88   21.97
  -2  -1  -2   61.96    1.79
   2   1   2   62.14    1.75
  -2  -1  -2   68.66    1.84
   2   1   2   65.45    1.71
   2   1   2   62.04    1.78
   2   1   2   62.94    1.74
   2   1   2   63.42    1.78
   2   1   2   64.03    1.82
   2   1   2   65.06    1.71
   1  -1  -4   20.37    0.70
   1  -1  -4   18.81    0.67
  -1   1   4   18.96    0.69
   1  -1  -4   18.72    0.81
  -1   1   4   20.33    0.70
   1  -1  -4   18.13    1.45
   1  -1  -4   20.71    0.74
  -1   1   4   21.00    0.75
  -1   1   4   19.31    1.28
  -1   1   4   18.41    1.29
  -1   1   4   20.03    0.67
   1  -1  -4   16.83    1.43
  -1  -3   1   11.85    0.47
   1   3  -1   12.30    0.55
   1   3  -1   12.51    1.54
  -1  -3   1   12.85    0.64
   1   3  -1   12.47    0.57
   1   3  -1   11.98    0.55
   1   3  -1   12.42    0.46
  -1  -3   1   12.73    1.24
   1   3  -1    9.66    1.26
  -1  -3   1   12.32    0.51
  -1  -3   1   11.37    0.59
  -1  -3   1   11.28    0.87
   1   3  -1   12.15    0.45
   0   0   5    8.51    0.31
   0   0  -5    8.46    0.95
   0   0   5    7.75    0.38
   0   0   5    7.31    1.31
   0   0   5    8.30    0.52
   0   0  -5    8.34    0.42
   0   0  -5    8.50    0.40
   0   0   5    7.82    0.37
   0   0  -5    5.13    1.17
   0   0   5    7.94    1.40
  -1  -2   3  138.98    3.64
   1   2  -3  150.91    3.58
  -1  -2   3  138.14    4.66
   1   2  -3  146.58    4.60
   1   2  -3  143.02    3.56
   1   2  -3  141.43    3.66
   1   2  -3  139.77    3.58
   1   2  -3  149.27    3.56
  -1  -2   3  142.17    3.57
   1   2  -3  139.69    3.76
  -1  -2   3  140.41    4.41
  -1  -2   3  143.14    3.94
  -1  -2   3  145.82    3.60
  -2   0   1    8.93    0.49
   2   0  -1    7.26    0.36
  -2   0   1   10.09    0.45
   2   0  -1    7.39    0.87
   2   0  -1    7.62    0.42
  -2   0   1    8.64    0.73
   2   0  -1    7.96    0.52
  -2   0   1    7.37    0.37
  -2   0   1    8.90    0.47
   2   0  -1    6.78    0.75
  -2   0   1    8.38    0.28
  -2   0   1    9.18    0.54
  -2  -1   1  230.91    5.85
  -2  -1   1  233.86    6.00
  -2  -1   1  247.57    6.16
  -2  -1   1  248.14    5.89
   2   1  -1  232.72    5.79
  -2  -1   1  250.07    5.77
  -2  -1   1  248.29    5.96
   2   1  -1  227.99    6.01
   2   1  -1  229.17    5.87
  -2  -1   1  212.82    5.80
   2   1  -1  239.89    5.73
   2   1  -1  221.88    6.39
   1  -1   4  212.50    5.07
   1  -1   4  204.44    5.70
  -1   1  -4  209.93    5.14
  -1   1  -4  209.52    5.26
   1  -1   4  201.08    5.92
   1  -1   4  205.50    5.04
   1  -1   4  214.04    5.06
   1  -1   4  202.72    5.29
  -1   1  -4  205.85    5.45
   1  -1   4  214.69    6.02
   1  -1   4  201.00    6.03
   1  -1   4  206.25    5.10
   1  -1   4  200.69    5.16
  -1   1  -4  206.68    5.08
  -2  -2  -1  222.00    5.46
   2   2   1  214.77    5.43
  -2  -2  -1  208.62    5.28
   2   2   1  210.86    5.36
  -2  -2  -1  226.07    5.44
   2   2   1  212.08    5.40
   2   2   1  210.40    5.46
  -2  -2  -1  212.64    5.41
   2   2   1  228.91    5.35
   2   2   1  210.41    5.30
   2   2   1  220.29    5.39
   2   2   1  212.39    5.55
   1   1   5 2419.81   58.91
  -1  -1  -5 2491.65   58.11
   1   1   5 2407.55   58.18
   1   1   5 2407.66   58.28
   1   1   5 2434.22   58.06
  -1  -1  -5 2415.96   58.95
  -1  -1  -5 2469.21   58.35
   1   1   5 2442.07   58.06
   1   1   5 2423.87   58.08
   1   1   5 2450.23   58.20
  -1  -1  -5 2392.12   59.11
   1   1   5 2360.09   58.95
   1   1   5 2432.18   58.52
   2   0   2  178.17    4.45
  -2   0  -2  181.51    4.48
  -2   0  -2  179.43    4.51
   2   0   2  177.45    4.51
   2   0   2  179.37    4.57
   2   0   2  178.93    4.41
   2   0   2  165.70    4.39
   2   0   2  185.37    4.52
   2   0   2  185.66    4.40
  -2   0  -2  172.78    4.56
   2   0   2  181.06    4.66
   1   1  -4  188.50    4.56
  -1  -1   4  175.73    4.55
   1   1  -4  181.24    5.42
  -1  -1   4  196.32    5.59
   1   1  -4  187.24    4.53
   1   1  -4  187.69    4.59
   1   1  -4  197.50    5.95
  -1  -1   4  189.91    4.51
  -1  -1   4  190.03    4.57
   1   1  -4  170.38    4.55
  -1  -1   4  193.30    4.77
  -1  -1   4  174.03    4.62
   1   1  -4  186.27    5.08
   0   3  -2   71.33    2.49
   0  -3   2   74.69    2.01
   0   3  -2   76.48    2.04
   0  -3   2   76.78    2.30
   0   3  -2   78.66    2.76
   0  -3   2   74.28    1.97
   0   3  -2   74.36    2.39
   0  -3   2   72.88    2.97
   0   3  -2   65.87    1.76
   0  -3   2   76.43    2.13
   0   3  -2   73.26    2.02
   0   3  -2   72.78    1.78
   0  -3   2   76.16    1.81
   2   2   2    3.50    0.21
   2   2   2    3.99    0.37
  -2  -2  -2    3.98    0.45
   2   2   2    4.10    0.35
   2   2   2    3.41    0.34
   2   2   2    4.46    0.37
  -2  -2  -2    4.33    0.50
   2   2   2    4.83    0.43
   2   2   2    3.78    0.31
   2   2   2    3.66    0.44
  -2  -2  -2    3.60    0.35
  -2  -2  -2    3.87    0.37
   0   2   5    5.75    0.37
   0  -2  -5    5.64    1.10
   0   2   5    6.12    0.90
   0  -2  -5    5.37    0.24
   0  -2  -5    6.27    0.38
   0   2   5    5.80    0.99
   0   2   5    5.43    0.51
   0  -2  -5    5.82    0.49
   0  -2  -5    5.11    1.16
   0   2   5    5.97    0.41
   0   2   5    6.18    0.37
   2   2   0  366.03    9.31
  -2  -2   0  372.36    9.36
  -2  -2   0  374.31    9.40
  -2  -2   0  376.77    9.52
   2   2   0  390.55    9.44
   2   2   0  359.42    9.61
  -2  -2   0  396.90    9.40
   2   2   0  398.11    9.32
   2   2   0  391.66    9.81
  -2  -2   0  395.00    9.26
   0  -3  -4    1.58    0.61
   0   3   4    1.01    0.50
   0   3   4    1.84    0.30
   0  -3  -4    1.27    0.32
   0   3   4    1.44    0.16
   0  -3  -4    1.47    0.73
   0   3   4    1.36    0.46
   0   3   4    1.66    0.67
   0   3   4    1.43    0.28
   0   3   4    1.02    0.50
   0  -3  -4    1.20    0.62
   0  -3  -4    1.77    0.84
   0  -3  -4    2.07    0.54
   2   1   3   91.70    2.38
  -2  -1  -3   86.33    2.32
   2   1   3   85.78    2.27
  -2  -1  -3   80.63    2.34
  -2  -1  -3   87.74    2.44
   2   1   3   84.03    2.47
   2   1   3   90.10    2.34
   2   1   3   83.00    2.42
   2   1   3   88.22    2.29
   2   1   3   89.19    2.34
   2   1   3   87.37    2.29
   2   1   3   81.42    2.28
  -1  -3  -4   93.24    2.47
   1   3   4   96.07    2.74
   1   3   4   93.73    2.64
   1   3   4   94.85    2.82
  -1  -3  -4   94.73    2.40
   1   3   4   96.10    2.54
  -1  -3  -4   87.54    2.76
  -1  -3  -4   93.52    2.88
   1   3   4   91.80    2.61
   1   3   4   85.06    2.74
   1   3   4   95.47    2.70
  -1  -3  -4   93.31    3.13
   1   2   5   40.81    1.24
  -1  -2  -5   39.27    1.87
  -1  -2  -5   37.74    1.64
   1   2   5   42.55    1.83
   1   2   5   41.53    1.64
   1   2   5   38.81    1.18
  -1  -2  -5   38.58    1.14
   1   2   5   40.14    1.43
  -1  -2  -5   35.85    1.98
  -1  -2  -5   42.45    1.20
   1   2   5   39.28    1.27
  -1   0  -5   11.30    1.27
  -1   0  -5   12.37    0.82
   1   0   5   13.05    0.53
  -1   0  -5   14.25    0.51
  -1   0  -5   15.17    1.12
   1   0   5   13.44    0.95
   1   0   5   12.05    1.51
   1   0   5   14.17    0.51
   1   0   5   13.26    0.47
   1   0   5   13.05    0.51
   1   0   5   12.81    0.90
   1   0   5   13.83    0.47
   1   0   5   12.01    0.50
   1   0   5   14.53    1.44
  -1   2  -3  695.41   16.53
   1  -2   3  731.07   16.68
   1  -2   3  710.93   16.81
   1  -2   3  665.47   16.48
   1  -2   3  706.76   17.42
  -1   2  -3  739.73   16.81
   1  -2   3  715.84   17.00
  -1   2  -3  650.15   16.84
  -1   2  -3  710.53   16.65
   1  -2   3  721.62   17.25
   1  -2   3  709.62   16.72
   1  -2   3  698.98   16.52
   1  -2   3  758.31   17.47
   2  -1   0  148.75    3.72
   2  -1   0  152.35    3.76
  -2   1   0  151.24    3.73
   2  -1   0  150.56    3.85
   2  -1   0  147.47    4.12
  -2   1   0  152.93    3.78
  -2   1   0  142.84    3.72
  -2   1   0  150.89    3.66
  -2   1   0  142.39    3.81
   2  -1   0  146.06    3.85
   2  -1   0  139.64    3.62
   2  -1   0  146.29    3.90
   2  -1   0  141.30    3.85
   1  -3  -1   13.93    0.91
  -1   3   1   13.82    0.78
  -1   3   1   13.47    0.73
   1  -3  -1   13.17    0.80
  -1   3   1   13.84    0.55
   1  -3  -1   14.07    0.58
   1  -3  -1   13.44    0.89
  -1   3   1   15.10    0.45
   1  -3  -1   14.75    0.72
   1  -3  -1   11.91    0.95
  -1   3   1   14.30    0.60
   1  -3  -1   14.05    0.64
  -1   3   1   13.49    0.60
   0   2  -4  630.26   15.94
   0  -2   4  653.97   15.13
   0  -2   4  638.38   15.95
   0   2  -4  567.93   16.06
   0  -2   4  593.17   14.79
   0   2  -4  610.22   14.80
   0   2  -4  633.03   15.68
   0  -2   4  610.70   15.65
   0  -2   4  667.08   14.88
   0  -2   4  617.16   16.22
   0  -2   4  668.81   15.06
   0   2  -4  642.39   14.89
   0   2  -4  667.24   15.23
   1  -3   0  282.58    6.93
  -1   3   0  293.34    6.82
  -1   3   0  292.01    6.96
  -1   3   0  273.92    6.97
  -1   3   0  278.43    7.13
  -1   3   0  282.82    7.17
   1  -3   0  270.28    7.28
   1  -3   0  276.63    7.09
   1  -3   0  280.51    7.24
  -1   3   0  279.36    7.24
   1  -3   0  282.99    6.97
  -1   3   0  274.52    7.14
   1  -3   0  278.30    7.45
   2   0  -2   51.95    2.01
   2   0  -2   50.57    1.42
   2   0  -2   49.61    1.48
  -2   0   2   53.85    1.58
  -2   0   2   55.05    1.92
  -2   0   2   51.39    1.51
  -2   0   2   53.12    1.74
   2   0  -2   50.56    1.54
  -2   0   2   49.36    1.47
   2   0  -2   51.55    1.48
   2   0  -2   49.74    2.18
  -2   0   2   53.40    1.36
  -2   1  -1   39.58    1.09
  -2   1  -1   40.99    1.15
   2  -1   1   42.17    1.28
   2  -1   1   37.99    1.21
   2  -1   1   34.02    1.27
   2  -1   1   40.13    1.29
   2  -1   1   40.84    1.07
   2  -1   1   41.00    1.16
  -2   1  -1   42.02    1.23
  -2   1  -1   39.31    1.16
  -2   1  -1   37.12    1.06
   2  -1   1   41.28    1.29
   1   3  -2   37.86    1.18
  -1  -3   2   37.66    2.12
  -1  -3   2   38.14    1.09
  -1  -3   2   36.23    1.22
   1   3  -2   37.14    1.55
   1   3  -2   29.73    2.35
   1   3  -2   36.88    1.05
  -1  -3   2   39.43    1.09
   1   3  -2   37.53    1.04
   1   3  -2   37.84    1.18
  -1  -3   2   37.43    1.20
   1   3  -2   39.03    1.44
  -1  -3   2   34.96    1.55
   1   3  -2   39.79    2.19
  -1  -3   2   38.76    1.08
   0   1  -5   48.82    1.35
   0   1  -5   42.93    2.62
   0  -1   5   47.45    2.44
   0   1  -5   49.93    2.11
   0   1  -5   49.00    1.36
   0  -1   5   47.04    1.32
   0  -1   5   43.38    1.71
   0  -1   5   51.27    2.56
   0  -1   5   48.46    1.27
   0   1  -5   45.43    2.38
   0  -1   5   49.38    1.45
   0   1  -5   50.37    1.29
   0  -1   5   48.04    1.29
   2   2   3  397.00    9.21
   2   2   3  378.94    9.13
   2   2   3  366.27    9.17
   2   2   3  349.93    9.19
  -2  -2  -3  392.59    9.43
   2   2   3  366.83    9.17
   2   2   3  379.33    9.21
  -2  -2  -3  385.35    9.34
   2   2   3  374.76    9.17
  -2  -2  -3  363.10    9.14
  -1   2   4  264.55    6.94
  -1   2   4  263.70    6.93
  -1   2   4  254.09    6.36
   1  -2  -4  262.32    6.46
   1  -2  -4  256.49    7.29
  -1   2   4  263.61    6.55
   1  -2  -4  249.65    6.39
   1  -2  -4  247.79    6.59
  -1   2   4  273.52    6.41
   1  -2  -4  251.28    6.55
  -1   2   4  253.48    6.73
  -1   2   4  257.75    6.44
   1  -2  -4  250.95    7.25
   1  -2  -4  263.80    6.40
   1  -2  -4  260.99    6.34
  -2   1   1  271.36    6.58
   2  -1  -1  249.28    6.56
   2  -1  -1  255.16    6.79
  -2   1   1  268.74    6.38
  -2   1   1  268.19    6.52
   2  -1  -1  278.31    6.61
  -2   1   1  276.22    6.55
  -2   1   1  277.99    6.51
   2  -1  -1  261.24    6.45
  -2   1   1  253.15    6.25
   2  -1  -1  267.04    6.97
   2  -1  -1  261.19    6.37
  -2  -2   1 1048.31   25.63
  -2  -2   1 1099.54   26.00
   2   2  -1 1050.24   25.59
  -2  -2   1 1120.32   26.10
   2   2  -1 1059.62   25.56
  -2  -2   1 1108.14   25.78
   2   2  -1 1033.15   25.56
  -2  -2   1 1081.90   25.62
   2   2  -1 1077.75   25.64
   2   2  -1 1063.45   25.97
   2   2  -1 1047.18   25.62
  -2  -2   1 1099.14   25.62
  -2  -2   1 1074.83   25.54
   2   2  -1 1016.29   26.31
   2   1  -2  607.65   16.85
   2   1  -2  576.48   16.00
  -2  -1   2  660.40   16.06
  -2  -1   2  719.35   16.00
  -2  -1   2  682.41   16.05
   2   1  -2  652.06   15.99
   2   1  -2  680.46   16.44
   2   1  -2  680.13   16.06
   2   1  -2  637.25   16.27
  -2  -1   2  686.91   16.47
  -2  -1   2  682.58   16.03
   2   1  -2  669.86   16.06
  -2  -1   2  661.81   16.15
  -2  -1   2  708.64   16.60
   2   0   3   47.00    1.34
   2   0   3   43.68    1.45
   2   0   3   48.55    1.36
  -2   0  -3   47.98    1.41
  -2   0  -3   49.29    1.43
   2   0   3   50.21    1.44
   2   0   3   49.07    1.43
   2   0   3   56.63    1.60
   2   0   3   48.49    1.81
   2   0   3   47.23    1.34
   2   0   3   51.40    1.64
  -2   0  -3   48.56    1.56
   2   0   3   51.07    1.43
   1  -3  -2 1139.53   27.67
  -1   3   2 1186.66   27.48
   1  -3  -2 1107.00   27.40
   1  -3  -2 1091.15   27.63
  -1   3   2 1143.13   27.28
   1  -3  -2 1083.25   27.87
   1  -3  -2 1122.74   27.80
  -1   3   2 1169.77   27.34
  -1   3   2 1150.12   27.60
   1  -3  -2 1132.73   27.61
  -1   3   2 1147.35   27.40
  -1   3   2 1173.77   27.40
  -1   3   2 1122.57   27.64
   1  -3  -2 1136.89   27.94
  -1   3   2 1119.30   27.57
  -1   3  -1  405.89    9.60
  -1   3  -1  383.54    9.41
   1  -3   1  385.56    9.49
   1  -3   1  377.32   10.09
   1  -3   1  375.09    9.67
   1  -3   1  392.22    9.36
   1  -3   1  378.27    9.86
  -1   3  -1  391.66    9.35
   1  -3   1  397.18    9.95
  -1   3  -1  364.32    9.55
  -1   3  -1  384.11    9.61
   1  -3   1  394.52    9.66
   2  -1   2  375.31    9.19
   2  -1   2  371.55    9.23
   2  -1   2  372.67    9.14
   2  -1   2  368.11    8.97
   2  -1   2  380.89    8.95
   2  -1   2  372.06    9.05
  -2   1  -2  374.59    9.16
  -2   1  -2  366.64    9.07
   2  -1   2  368.57    9.23
   2  -1   2  362.42    9.19
  -1   0   5  138.55    4.63
   1   0  -5  139.05    4.77
  -1   0   5  142.00    3.67
  -1   0   5  151.87    3.74
  -1   0   5  145.17    3.66
   1   0  -5  143.52    3.68
   1   0  -5  139.35    3.55
   1   0  -5  136.05    3.68
   1   0  -5  131.62    4.93
  -1   0   5  139.78    4.65
   1   0  -5  150.65    3.58
   1   0  -5  151.48    3.97
  -1   0   5  146.06    3.61
   0   4   1  774.34   18.84
   0  -4  -1  768.47   18.71
   0   4   1  804.96   19.22
   0   4   1  780.88   18.62
   0  -4  -1  735.39   18.84
   0  -4  -1  782.32   18.84
   0  -4  -1  781.92   19.71
   0   4   1  738.86   19.00
   0  -4  -1  740.55   19.09
   0  -4  -1  773.44   19.02
   0   4   1  778.39   18.70
   0  -4  -1  761.55   19.10
   0   4   1  777.30   18.94
   0  -4  -1  792.23   18.61
  -1  -4  -1   98.57    2.75
   1   4   1  102.35    2.64
   1   4   1   96.95    3.68
   1   4   1  104.71    2.72
   1   4   1  102.68    2.78
  -1  -4  -1  100.66    2.97
   1   4   1  101.96    2.82
  -1  -4  -1  102.76    2.98
   1   4   1  100.80    2.96
   1   4   1  102.33    2.71
   1   4   1  106.38    3.20
  -1  -4  -1  105.64    2.87
  -1  -4  -1  100.80    3.14
  -1  -4  -1  103.49    2.94
   1   4   1  103.39    2.92
  -1   1   5  640.21   16.02
   1  -1  -5  632.48   15.35
   1  -1  -5  573.46   16.32
   1  -1  -5  627.79   15.26
   1  -1  -5  602.28   15.18
   1  -1  -5  587.84   16.32
  -1   1   5  656.35   15.22
   1  -1  -5  618.73   15.22
  -1   1   5  630.17   15.24
  -1   1   5  663.76   15.22
  -1   1   5  615.95   16.03
   1  -1  -5  638.42   15.30
  -1   1   5  617.51   15.25
   1   4   2   30.58    1.43
  -1  -4  -2   32.66    1.18
  -1  -4  -2   31.68    1.42
  -1  -4  -2   32.52    1.29
   1   4   2   30.85    1.15
   1   4   2   31.50    1.05
  -1  -4  -2   30.32    1.32
  -1  -4  -2   30.88    1.09
   1   4   2   35.44    1.09
   1   4   2   31.41    1.81
   1   4   2   29.03    1.17
   2  -1  -2    6.57    0.97
  -2   1   2    7.01    0.47
  -2   1   2    7.26    0.46
  -2   1   2    6.78    0.34
   2  -1  -2    6.42    0.40
  -2   1   2    7.52    0.43
   2  -1  -2    6.40    0.48
  -2   1   2    6.87    0.61
  -2   1   2    5.79    0.49
   2  -1  -2    6.47    0.35
   2  -1  -2    5.02    0.92
   2   1   4   24.49    0.80
   2   1   4   22.58    0.80
   2   1   4   23.78    0.91
   2   1   4   22.18    0.74
   2   1   4   25.45    0.86
   2   1   4   24.37    1.31
   2   1   4   21.82    1.01
   2   1   4   24.70    0.82
   2   1   4   22.26    0.82
   2   1   4   24.97    1.32
  -2  -1  -4   23.23    1.08
   2   3   1   49.44    1.45
   2   3   1   48.88    1.57
  -2  -3  -1   47.58    1.58
   2   3   1   48.87    1.44
  -2  -3  -1   51.55    1.50
   2   3   1   50.37    1.36
  -2  -3  -1   48.83    1.44
  -2  -3  -1   50.01    1.53
   2   3   1   47.85    1.82
  -2  -3  -1   49.07    1.47
  -2  -3  -1   51.54    1.58
   0   4   2  440.67   11.05
   0  -4  -2  430.91   10.66
   0  -4  -2  440.44   10.72
   0   4   2  436.12   10.52
   0   4   2  404.72   10.70
   0  -4  -2  435.20   10.77
   0  -4  -2  442.86   10.51
   0   4   2  417.31   10.72
   0   4   2  439.43   10.60
   0  -4  -2  424.27   10.80
   0  -4  -2  397.64   10.91
   0  -4  -2  441.74   11.47
   0   3  -3  877.14   21.20
   0   3  -3  899.22   21.35
   0  -3   3  824.12   21.61
   0   3  -3  911.02   22.12
   0  -3   3  942.99   21.22
   0  -3   3  860.61   21.30
   0  -3   3  906.69   21.44
   0   3  -3  813.89   21.71
   0  -3   3  818.31   22.28
   0  -3   3  856.97   21.51
  -2  -3  -2   98.05    2.57
   2   3   2   95.79    2.54
   2   3   2   94.16    2.49
   2   3   2   95.89    2.68
   2   3   2   92.38    2.64
  -2  -3  -2  104.02    2.76
   2   3   2   91.22    2.84
  -2  -3  -2  101.35    2.66
  -2  -3  -2   96.28    2.79
   2   3   2   95.93    2.60
   0  -1  -6  143.64    5.20
   0  -1  -6  125.36    4.18
   0  -1  -6  170.44    4.03
   0  -1  -6  175.54    3.96
   0   1   6  150.50    3.97
   0   1   6  150.79    3.99
   0   1   6  150.46    4.92
   0   1   6  159.42    3.86
   0  -1  -6  147.01    5.15
   0   1   6  146.58    4.95
   0   1   6  153.00    4.00
  -1   3   3  371.18    8.86
  -1   3   3  360.73    8.62
  -1   3   3  343.92    8.91
   1  -3  -3  342.45    8.75
   1  -3  -3  333.40    9.30
   1  -3  -3  341.91    9.37
  -1   3   3  369.70    8.77
   1  -3  -3  333.99    8.96
   1  -3  -3  360.49    9.10
  -1   3   3  372.64    8.83
   1  -3  -3  343.08    8.82
   1  -3  -3  348.73    8.74
  -1   3   3  368.21    9.07
   1   2  -4   82.15    3.15
  -1  -2   4   92.64    3.36
  -1  -2   4   88.95    2.30
   1   2  -4   85.11    2.23
   1   2  -4   85.26    3.42
   1   2  -4   85.71    2.49
   1   2  -4   87.69    2.21
   1   2  -4   86.07    2.22
  -1  -2   4   88.31    2.28
  -1  -2   4   88.47    2.64
  -1  -2   4   88.22    3.58
   1   2  -4   89.87    2.29
  -1  -2   4   90.01    2.24
   0   4   0   36.85    1.01
   0  -4   0   38.03    1.59
   0  -4   0   34.09    2.19
   0   4   0   39.20    1.71
   0   4   0   35.43    1.29
   0  -4   0   37.57    1.09
   0  -4   0   36.38    1.30
   0  -4   0   36.01    1.44
   0  -4   0   40.65    1.41
   0   4   0   36.18    1.36
   0   4   0   37.68    1.19
   0   4   0   35.09    1.66
   0   4   0   39.47    1.10
   0  -4   0   34.11    1.90
  -1  -3  -5   11.33    0.58
   1   3   5   11.39    0.58
  -1  -3  -5   12.94    1.37
   1   3   5   10.45    0.69
  -1  -3  -5    9.95    0.48
   1   3   5   11.88    0.88
   1   3   5   10.24    0.75
  -1  -3  -5   11.70    0.95
  -1  -3  -5    9.95    1.04
   1   3   5   10.92    0.48
   1   3   5   11.77    0.73
   1   3   5   10.25    1.00
   1   3   5   10.44    0.72
   2   2   4 1476.87   35.14
  -2  -2  -4 1488.40   35.46
  -2  -2  -4 1491.82   34.94
   2   2   4 1416.06   34.98
   2   2   4 1450.29   35.01
   2   2   4 1452.56   35.00
   2   2   4 1410.29   34.92
  -2  -2  -4 1492.98   34.92
   2   2   4 1473.33   34.88
  -2  -2  -4 1436.30   35.23
   2   2   4 1452.59   34.98
   2   2   4 1471.34   35.15
   0   3   5   82.07    2.34
   0  -3  -5   84.89    2.14
   0  -3  -5   80.41    3.24
   0   3   5   83.94    2.44
   0  -3  -5   82.12    2.46
   0  -3  -5   87.34    2.44
   0  -3  -5   87.64    2.35
   0  -3  -5   81.27    2.44
   0   3   5   85.45    2.75
   0   3   5   85.81    2.54
   0  -3  -5   82.91    3.09
   0   3   5   85.62    2.84
   0   3   5   83.67    2.52
   1   4   0   86.54    2.97
  -1  -4   0   98.88    2.69
   1   4   0   87.94    2.61
   1   4   0   92.31    2.43
   1   4   0   90.82    2.40
   1   4   0   90.59    2.50
   1   4   0   91.98    2.99
  -1  -4   0   83.88    2.95
  -1  -4   0   89.97    2.60
  -1  -4   0   89.50    2.67
  -1  -4   0   93.28    2.49
  -1  -4   0   92.77    2.95
   1   4   0   85.09    2.52
   1   4   0   93.39    3.63
   1   4   0   98.03    2.38
   1  -1   5    8.89    1.43
   1  -1   5    8.38    1.34
   1  -1   5    7.09    1.21
   1  -1   5    8.01    0.35
   1  -1   5    8.11    0.34
   1  -1   5    9.02    0.34
  -1   1  -5    7.90    0.37
   1  -1   5    8.62    0.31
   1  -1   5    7.60    0.46
  -1   1  -5    7.78    0.51
  -1   1  -5    9.27    0.78
   1  -1   5    8.87    0.37
   1  -1   5    7.80    0.58
   1  -1   5    7.80    1.65
  -2  -2   2  809.75   19.51
  -2  -2   2  819.95   19.48
   2   2  -2  775.12   19.97
   2   2  -2  803.12   19.48
  -2  -2   2  818.20   20.12
   2   2  -2  782.42   19.57
   2   2  -2  801.53   19.51
  -2  -2   2  844.79   19.71
  -2  -2   2  803.58   19.52
  -2  -2   2  882.67   20.30
   2   2  -2  787.22   20.48
   2   2  -2  800.84   19.49
  -2  -2   2  843.59   19.51
   2   2  -2  797.08   19.47
  -2  -3   0  219.54    5.28
  -2  -3   0  215.92    5.70
   2   3   0  207.51    5.77
   2   3   0  214.82    5.26
   2   3   0  208.08    5.24
   2   3   0  196.84    5.38
  -2  -3   0  205.65    5.23
  -2  -3   0  203.78    5.30
  -2  -3   0  189.78    5.40
   2   3   0  205.68    5.30
  -2  -3   0  219.19    5.39
   2   3   0  214.91    5.43
  -2  -3   0  222.78    5.31
  -1  -4  -3   84.56    2.69
  -1  -4  -3   88.27    2.56
  -1  -4  -3   88.54    2.85
  -1  -4  -3   79.00    2.54
  -1  -4  -3   87.77    2.43
   1   4   3   82.97    2.99
   1   4   3   89.06    2.56
   1   4   3   81.62    2.56
   1   4   3   87.86    2.78
   1   4   3   80.39    2.36
  -1  -4  -3   87.00    2.53
   1   4   3   96.93    2.58
  -1  -4  -3   86.69    2.41
   2   0  -3  165.05    4.51
  -2   0   3  170.68    4.43
   2   0  -3  166.70    4.41
  -2   0   3  176.99    4.93
   2   0  -3  166.22    4.29
   2   0  -3  166.13    5.31
  -2   0   3  172.36    4.37
  -2   0   3  175.36    4.36
   2   0  -3  173.85    4.33
  -2   0   3  174.42    4.82
   2   0  -3  167.37    5.07
  -2   0   3  173.87    4.25
   0   0   6  889.56   21.40
   0   0   6  908.82   21.40
   0   0   6  867.84   22.60
   0   0  -6  843.72   22.60
   0   0  -6  906.38   21.40
   0   0  -6  920.06   21.45
   0   0   6  868.19   21.28
   0   0  -6  910.16   21.98
   0   0   6  915.48   21.52
   0   4   3  156.85    4.38
   0  -4  -3  153.79    4.42
   0   4   3  148.08    4.01
   0  -4  -3  163.08    4.09
   0  -4  -3  163.81    4.52
   0   4   3  159.72    4.38
   0  -4  -3  151.56    4.80
   0   4   3  167.31    4.24
   0  -4  -3  147.32    4.28
   0   4   3  164.07    4.16
   0  -4  -3  150.44    4.60
   0   4   3  163.05    4.53
   0   4   3  160.30    4.10
   0  -4  -3  170.85    4.49
   0  -4  -3  159.22    4.28
   0  -4  -3  164.13    4.19
   1   1   6   64.07    2.01
  -1  -1  -6   71.55    1.75
  -1  -1  -6   69.58    2.21
   1   1   6   59.58    1.69
  -1  -1  -6   64.33    2.74
   1   1   6   70.53    2.28
   1   1   6   66.86    1.87
   1   1   6   67.30    2.82
   1   1   6   68.81    1.69
   1   1   6   65.90    2.77
  -1  -1  -6   64.30    2.87
   1   1   6   71.16    1.71
   1   1   6   64.42    1.84
   1   1   6   60.79    1.84
  -2  -3  -3  299.16    7.52
  -2  -3  -3  296.44    7.52
  -2  -3  -3  308.83    7.52
   2   3   3  315.10    7.53
   2   3   3  299.40    7.76
  -2  -3  -3  311.21    7.88
   2   3   3  301.60    7.56
   2   3   3  303.54    7.63
   2   3   3  294.66    7.61
  -2  -3  -3  284.50    7.81
   2   3   3  328.42    7.65
  -1   3  -2    2.65    0.31
  -1   3  -2    2.71    0.35
   1  -3   2    3.52    0.89
   1  -3   2    2.84    0.79
  -1   3  -2    2.72    0.18
   1  -3   2    2.87    1.06
  -1   3  -2    2.99    0.50
   1  -3   2    3.54    0.52
   1  -3   2    1.77    0.48
   1  -3   2    2.52    0.33
   1  -3   2    2.89    0.21
  -1   3  -2    3.09    0.50
  -1   3  -2    2.14    0.42
  -1   2  -4   70.91    2.09
   1  -2   4   71.56    2.05
   1  -2   4   72.40    1.91
   1  -2   4   72.21    2.78
   1  -2   4   59.53    1.69
   1  -2   4   67.95    2.77
  -1   2  -4   72.49    1.82
   1  -2   4   69.19    3.04
   1  -2   4   69.94    1.69
  -1   2  -4   72.91    1.97
   1  -2   4   74.48    2.26
   1  -2   4   72.46    1.91
   1  -2   4   75.05    1.72
  -2   0  -4  132.22    3.67
   2   0   4  134.07    4.10
   2   0   4  136.13    3.70
   2   0   4  143.26    3.71
   2   0   4  161.85    3.75
   2   0   4  144.25    4.31
   2   0   4  143.20    3.67
   2   0   4  145.66    3.62
   2   0   4  149.03    3.71
   2   0   4  136.20    3.63
   2   0   4  138.31    3.91
   2   0   4  148.72    3.65
  -1  -1   5  123.97    3.24
  -1  -1   5  127.78    3.45
   1   1  -5  124.48    3.19
  -1  -1   5  120.76    3.32
   1   1  -5  122.93    4.71
  -1  -1   5  130.75    4.44
   1   1  -5  124.99    3.24
   1   1  -5  129.44    3.24
   1   1  -5  132.59    3.13
   1   1  -5  121.90    4.25
   1   1  -5  131.43    3.29
   1   1  -5  125.56    3.87
  -1  -1   5  125.51    3.22
  -2  -1   3  208.78    5.11
   2   1  -3  204.78    5.11
  -2  -1   3  204.68    5.13
  -2  -1   3  205.14    5.26
  -2  -1   3  205.23    5.13
  -2  -1   3  212.80    5.08
   2   1  -3  197.73    5.71
   2   1  -3  194.86    5.07
   2   1  -3  202.00    5.14
  -2  -1   3  192.43    5.74
   2   1  -3  198.71    6.23
   2   1  -3  199.18    5.11
  -2  -1   3  220.69    5.92
   0   2   6   14.46    0.62
   0   2   6   13.76    1.34
   0  -2  -6   13.48    0.62
   0  -2  -6   11.57    0.37
   0   2   6   12.22    0.69
   0  -2  -6   10.05    0.44
   0  -2  -6   13.55    1.69
   0   2   6   14.18    0.59
   0  -2  -6   12.31    1.56
   0   2   6   14.51    1.29
   0  -2  -6   13.81    0.65
   0   2   6   12.56    0.44
   1   3  -3 1076.27   26.82
  -1  -3   3 1077.41   26.24
  -1  -3   3 1101.82   27.42
   1   3  -3 1067.17   26.47
  -1  -3   3 1084.68   26.02
   1   3  -3 1108.85   26.03
  -1  -3   3 1090.52   26.00
  -1  -3   3 1133.89   26.65
  -1  -3   3 1126.18   27.03
   1   3  -3 1018.86   27.75
  -1  -3   3 1087.99   26.16
  -1  -3   3 1070.87   26.06
   1   3  -3 1066.84   26.10
   1   3  -3 1094.47   25.98
   1   3  -3 1080.02   26.14
   2  -1   3   11.35    0.47
   2  -1   3   11.31    0.77
   2  -1   3    9.68    0.61
   2  -1   3   11.11    0.58
   2  -1   3   11.77    0.40
   2  -1   3   11.19    0.65
   2  -1   3   11.48    0.60
   2  -1   3   11.10    0.41
  -2   1  -3   11.51    0.54
  -2   1  -3   11.52    0.54
  -2   1  -3   10.76    0.48
   2  -1   3   10.80    0.67
   1   2   6  105.74    2.89
  -1  -2  -6  108.11    2.99
   1   2   6  105.84    2.94
   1   2   6  106.29    2.83
   1   2   6  105.80    3.43
   1   2   6  103.24    3.16
  -1  -2  -6  116.20    2.84
  -1  -2  -6  101.57    3.87
  -1  -2  -6  108.00    3.81
   1   2   6  103.68    3.57
   0   4  -1   67.94    2.20
   0  -4   1   69.49    3.12
   0   4  -1   68.96    1.77
   0  -4   1   65.30    1.97
   0   4  -1   63.62    2.00
   0  -4   1   66.06    2.01
   0  -4   1   66.50    2.29
   0   4  -1   70.57    2.09
   0   4  -1   67.92    1.69
   0  -4   1   64.80    2.13
   0   4  -1   67.89    1.92
   0   4  -1   70.45    2.62
  -1   2   5   17.72    0.72
  -1   2   5   16.02    1.29
   1  -2  -5   17.93    0.69
  -1   2   5   17.72    0.80
  -1   2   5   17.00    1.26
   1  -2  -5   14.77    1.58
  -1   2   5   17.82    0.67
  -1   2   5   17.31    0.62
   1  -2  -5   15.64    1.69
   1  -2  -5   16.36    0.83
   1  -2  -5   15.43    0.89
   1  -2  -5   17.20    0.70
  -1   2   5   18.52    1.14
  -2   2   0  387.31    8.91
   2  -2   0  359.52    9.01
   2  -2   0  373.61    9.28
   2  -2   0  334.41    8.98
  -2   2   0  371.65    9.11
  -2   2   0  369.67    9.13
   2  -2   0  356.93    9.21
   2  -2   0  362.51    9.16
   2  -2   0  371.18    8.89
   2  -2   0  375.19    9.24
   2  -2   0  379.50    9.33
  -2   2   0  378.66    9.02
  -2   1   3    3.58    0.38
   2  -1  -3    3.58    0.36
  -2   1   3    3.30    0.34
   2  -1  -3    3.91    0.42
   2  -1  -3    3.13    1.04
   2  -1  -3    3.59    0.30
   2  -1  -3    3.54    0.49
  -2   1   3    3.71    0.44
  -2   1   3    3.13    0.80
   2  -1  -3    3.21    1.09
   2  -1  -3    3.65    0.43
  -2   1   3    3.48    0.30
  -2   1   3    3.24    0.70
  -2   2   1   24.33    0.90
   2  -2  -1   22.30    1.18
  -2   2   1   24.72    0.83
   2  -2  -1   22.03    0.82
  -2   2   1   24.34    0.73
   2  -2  -1   22.30    1.01
   2  -2  -1   23.42    1.34
  -2   2   1   22.74    0.97
   2  -2  -1   22.62    0.71
  -2   2   1   22.69    0.94
  -1  -4   1  281.68    7.27
  -1  -4   1  282.14    7.07
   1   4  -1  297.49    7.02
  -1  -4   1  285.80    7.23
   1   4  -1  280.77    6.97
   1   4  -1  292.11    7.24
   1   4  -1  284.07    7.13
  -1  -4   1  286.43    7.25
  -1  -4   1  273.81    7.85
   1   4  -1  299.29    8.04
   1   4  -1  274.28    8.44
   1   4  -1  275.50    7.15
   1   4  -1  292.30    6.99
   2   3  -1   18.22    1.18
  -2  -3   1   20.58    0.77
  -2  -3   1   21.06    0.79
  -2  -3   1   20.28    0.79
  -2  -3   1   20.16    1.26
   2   3  -1   18.47    1.26
   2   3  -1   20.72    0.73
   2   3  -1   21.30    0.80
  -2  -3   1   18.72    1.43
   2   3  -1   19.67    0.70
   2   3  -1   20.00    0.77
   2   3  -1   19.57    0.76
  -2  -3   1   21.14    0.85
  -2  -3   1   20.76    0.78
   1   0   6  113.68    3.48
   1   0   6  114.82    2.97
  -1   0  -6  118.85    3.81
  -1   0  -6  111.93    3.44
  -1   0  -6  118.52    2.95
   1   0   6  110.92    3.56
   1   0   6  117.36    2.89
  -1   0  -6  119.90    4.07
   1   0   6  119.90    4.23
   1   0   6  113.65    2.91
   1   0   6  110.39    4.11
   1   0   6  111.65    2.98
   1   0   6  114.93    2.96
   0  -2   5  157.26    4.10
   0   2  -5  158.85    3.96
   0  -2   5  158.30    5.16
   0  -2   5  149.69    4.71
   0  -2   5  161.13    5.53
   0  -2   5  157.63    3.82
   0   2  -5  162.65    4.90
   0   2  -5  159.17    4.18
   0   2  -5  161.94    4.94
   0  -2   5  155.75    4.08
   0  -2   5  164.33    3.94
   1   4   4    0.15    0.65
  -1  -4  -4    0.18    0.69
  -1  -4  -4    0.36    0.47
  -1  -4  -4    0.39    0.58
   1   4   4    0.38    0.54
  -1  -4  -4    0.67    0.35
  -1  -4  -4    0.38    0.79
  -1  -4  -4    0.71    0.52
   1   4   4    0.40    0.74
   1   4   4    0.83    0.50
   1   4   4    0.25    0.57
  -2   2  -1   14.73    0.66
  -2   2  -1   14.87    0.69
   2  -2   1   15.69    0.87
   2  -2   1   14.98    0.77
   2  -2   1   14.55    0.80
   2  -2   1   14.62    0.77
  -2   2  -1   15.91    0.50
   2  -2   1   14.94    0.59
   2  -2   1   14.91    0.80
   2  -2   1   16.11    0.48
  -2   2  -1   15.24    0.59
  -2   2  -1   14.61    0.69
   2  -2   1   16.44    0.56
  -1   3   4  244.82    6.35
   1  -3  -4  250.51    6.24
   1  -3  -4  250.40    6.56
  -1   3   4  255.88    6.42
   1  -3  -4  245.45    6.16
   1  -3  -4  247.20    6.24
  -1   3   4  253.07    6.27
  -1   3   4  253.01    6.12
  -1   3   4  246.25    6.39
  -1   3   4  244.72    6.62
   1  -3  -4  226.95    6.96
   1  -3  -4  231.34    6.44
   1  -3  -4  248.40    6.20
   2   3   4  113.44    3.07
   2   3   4  108.17    3.02
   2   3   4  117.69    3.13
  -2  -3  -4  111.31    2.89
   2   3   4  113.40    3.12
   2   3   4  112.87    3.00
   2   3   4  103.37    2.99
  -2  -3  -4  108.46    3.52
   0  -4  -4  166.74    5.48
   0   4   4  189.15    4.90
   0  -4  -4  195.16    5.15
   0  -4  -4  184.33    5.19
   0   4   4  189.98    5.16
   0   4   4  187.55    5.19
   0   4   4  188.88    5.19
   0   4   4  193.34    4.76
   0  -4  -4  171.16    5.41
   0   4   4  192.46    5.03
   0  -4  -4  184.06    5.35
   0   4   4  193.58    4.78
   0  -4  -4  190.77    4.86
   2   1   5   38.41    1.18
   2   1   5   38.09    1.13
  -2  -1  -5   34.10    1.70
   2   1   5   34.24    1.80
   2   1   5   35.10    1.15
   2   1   5   37.04    1.14
  -2  -1  -5   35.15    1.56
   2   1   5   39.78    1.32
   2   1   5   32.96    1.46
   2   1   5   37.09    1.13
   2   1   5   39.23    1.89
   2   1   5   40.46    1.20
   0   1  -6  159.32    5.57
   0   1  -6  163.66    4.06
   0   1  -6  157.08    3.95
   0  -1   6  151.97    4.38
   0  -1   6  156.18    3.92
   0  -1   6  152.34    5.31
   0  -1   6  157.57    5.49
   0   1  -6  168.70    4.90
   0  -1   6  166.93    4.03
   0  -1   6  160.14    4.16
   0   1  -6  165.81    3.99
   0  -1   6  161.36    3.97
  -2   2   2   42.08    1.41
   2  -2  -2   41.16    1.30
   2  -2  -2   39.06    1.81
  -2   2   2   41.92    1.20
  -2   2   2   40.51    1.28
   2  -2  -2   40.37    1.46
  -2   2   2   40.59    1.31
  -2   2   2   40.01    1.34
   2  -2  -2   41.49    1.18
   2  -2  -2   41.76    1.92
   2  -2  -2   41.25    1.39
  -2   2   2   43.66    1.19
  -2   2   2   40.90    1.47
   2  -2  -2   41.66    1.48
   2  -2  -2   41.75    1.29
   2   2   5  222.96    5.69
   2   2   5  220.88    5.93
  -2  -2  -5  230.40    6.39
   2   2   5  225.99    5.80
   2   2   5  228.27    5.70
  -2  -2  -5  227.72    5.62
   2   2   5  221.93    5.62
  -2  -2  -5  218.08    6.06
  -2  -2  -5  229.80    5.58
   2   2   5  225.41    6.08
   2   2   5  216.75    5.86
   2   2   5  227.14    5.65
   2   2   5  225.06    5.85
  -2  -2   3  355.62    9.16
  -2  -2   3  333.91    8.99
  -2  -2   3  336.10    8.15
   2   2  -3  328.84    8.11
   2   2  -3  326.97    9.45
   2   2  -3  329.30    8.22
   2   2  -3  325.83    8.11
  -2  -2   3  324.69    8.15
  -2  -2   3  352.94    8.20
   2   2  -3  323.03    8.13
  -2  -2   3  323.79    8.35
   0   3  -4  103.96    2.69
   0  -3   4  102.32    3.07
   0   3  -4  110.06    3.19
   0   3  -4  106.02    3.76
   0  -3   4  114.05    3.05
   0  -3   4  108.90    2.93
   0  -3   4  100.36    3.76
   0  -3   4  106.05    2.69
   0   3  -4  108.55    2.73
   0   3  -4  108.82    3.80
   0  -3   4  111.35    2.69
   0  -3   4  103.77    4.07
   1  -3   3    0.77    1.19
  -1   3  -3    0.85    0.09
   1  -3   3    0.17    1.12
   1  -3   3    0.65    0.10
   1  -3   3    0.41    0.44
  -1   3  -3    0.51    0.30
   1  -3   3    0.98    0.31
   1  -3   3    0.49    0.45
  -1   3  -3    0.71    0.29
   1  -3   3    0.59    0.82
  -1   3  -3    0.71    0.43
   1  -3   3    0.90    0.79
  -2   2  -2   80.30    2.17
   2  -2   2   80.77    2.41
  -2   2  -2   79.04    2.25
   2  -2   2   78.54    2.48
   2  -2   2   80.48    2.52
   2  -2   2   79.89    2.39
   2  -2   2   82.45    2.17
   2  -2   2   84.90    2.04
   2  -2   2   85.10    2.14
   2  -2   2   83.37    2.39
   2  -2   2   92.04    2.64
  -2   2  -2   74.58    2.29
  -2   2  -2   79.72    2.29
  -2   0   4  306.19    7.41
   2   0  -4  305.99    7.36
   2   0  -4  287.48    7.57
   2   0  -4  282.59    8.61
   2   0  -4  284.58    8.32
   2   0  -4  296.58    7.39
  -2   0   4  314.54    8.16
  -2   0   4  298.66    8.05
  -2   0   4  306.19    7.49
   2   0  -4  296.72    7.34
  -2   0   4  257.49    7.33
  -2   0   4  317.00    7.34
  -2   0   4  307.44    7.41
   2   0  -4  312.72    7.49
   0   4  -2  153.24    4.31
   0   4  -2  153.44    4.38
   0  -4   2  134.40    5.30
   0   4  -2  149.96    3.94
   0  -4   2  136.76    4.94
   0   4  -2  154.04    3.60
   0   4  -2  152.92    4.63
   0  -4   2  152.90    3.93
   0   4  -2  143.70    3.93
   0  -4   2  148.77    4.21
   0  -4   2  147.63    4.55
   0  -4   2  153.66    3.87
   0   4  -2  145.13    3.83
   0   4  -2  138.05    3.61
   0  -4   2  152.51    4.08
   1   3   6  303.53    7.67
   1   3   6  290.66    7.72
   1   3   6  295.27    7.47
  -1  -3  -6  292.03    8.02
  -1  -3  -6  298.62    8.60
  -1  -3  -6  296.17    8.27
   1   3   6  290.86    7.57
   1   3   6  293.85    7.59
  -1  -3  -6  315.20    7.42
  -1  -3  -6  304.56    7.28
   1   3   6  303.60    8.06
  -1  -3  -6  282.77    7.29
   1   3   6  309.87    7.86
   2  -1   4   27.72    0.82
   2  -1   4   28.02    1.49
   2  -1   4   25.82    1.06
   2  -1   4   29.35    0.87
   2  -1   4   29.06    1.00
   2  -1   4   27.75    1.22
   2  -1   4   26.64    0.99
  -2   1  -4   26.25    0.90
   2  -1   4   30.38    0.99
  -2   1  -4   28.50    0.95
   2  -1   4   28.39    0.85
  -2   1  -4   28.57    0.95
   2  -1   4   27.21    1.09
   2  -1   4   27.77    1.60
   2  -1   4   27.03    1.39
  -1   1   6   -0.13    0.26
  -1   1   6    0.13    0.28
   1  -1  -6   -0.29    0.41
   1  -1  -6    0.07    1.32
   1  -1  -6    0.47    0.34
   1  -1  -6   -0.47    1.49
  -1   1   6   -1.06    1.09
  -1   1   6   -0.28    1.18
   1  -1  -6    0.04    0.28
  -1   1   6   -0.21    0.26
   1  -1  -6    0.40    0.44
  -1   1   6    0.06    0.28
   1  -1  -6    0.10    0.30
   0   3   6   45.79    2.03
   0   3   6   42.75    1.58
   0  -3  -6   44.93    2.49
   0   3   6   42.01    1.88
   0  -3  -6   43.84    1.15
   0   3   6   44.06    1.68
   0  -3  -6   42.50    1.37
   0  -3  -6   44.25    1.50
   0   3   6   45.26    1.42
   0   3   6   43.04    1.40
   0  -3  -6   45.41    2.32
  -1   0   6  133.19    4.83
   1   0  -6  135.19    4.06
   1   0  -6  142.97    3.58
   1   0  -6  143.19    3.73
   1   0  -6  152.83    3.58
  -1   0   6  140.65    3.70
  -1   0   6  152.00    3.78
  -1   0   6  141.36    3.70
   1   0  -6  134.97    5.19
  -1   0   6  142.43    3.62
   1   0  -6  129.76    4.90
   1   0  -6  146.10    3.73
  -1   0   6  134.06    4.82
  -2  -3   2   64.37    2.09
  -2  -3   2   63.39    1.85
  -2  -3   2   64.46    1.90
   2   3  -2   62.96    1.78
   2   3  -2   64.53    1.78
   2   3  -2   65.58    1.84
  -2  -3   2   66.20    1.84
   2   3  -2   64.71    1.84
   2   3  -2   65.09    2.01
   2   3  -2   61.78    2.51
   2   3  -2   58.59    2.56
  -2  -3   2   66.04    1.88
  -2  -3   2   63.97    2.78
  -2  -3   2   67.32    2.56
  -2  -3   2   66.03    1.85
   2   3  -2   69.62    1.87
   2   0   5  361.40    9.22
   2   0   5  371.25    9.26
   2   0   5  365.78   10.07
   2   0   5  374.68    9.32
   2   0   5  364.97    9.83
   2   0   5  405.71    9.33
   2   0   5  396.01    9.44
   2   0   5  382.79   10.15
   2   0   5  385.18    9.23
   2   0   5  369.74    9.42
  -1  -4   2    0.73    1.41
   1   4  -2   -0.13    0.18
  -1  -4   2   -0.24    0.40
   1   4  -2   -1.04    1.33
  -1  -4   2    0.22    0.24
  -1  -4   2   -0.10    0.28
   1   4  -2    0.08    0.18
  -1  -4   2    0.10    0.44
   1   4  -2    0.40    0.72
   1   4  -2   -0.11    0.33
  -1  -4   2   -0.08    0.78
   1   4  -2   -0.24    1.49
  -1  -4   2    0.32    0.40
   1   4  -2    0.10    0.41
  -1  -2   5  194.70    5.09
  -1  -2   5  187.61    5.95
   1   2  -5  179.62    4.54
  -1  -2   5  191.50    4.60
  -1  -2   5  190.05    4.66
  -1  -2   5  183.26    4.63
   1   2  -5  184.78    4.60
  -1  -2   5  181.24    6.11
   1   2  -5  190.06    6.12
   1   2  -5  181.53    5.77
   1   2  -5  185.95    4.64
   1   2  -5  194.51    4.92
   1  -4  -1  300.20    8.05
  -1   4   1  294.38    7.96
   1  -4  -1  300.76    7.72
  -1   4   1  309.03    8.07
   1  -4  -1  260.40    8.22
   1  -4  -1  321.29    7.80
  -1   4   1  306.12    7.96
   1  -4  -1  304.86    8.41
   1  -4  -1  287.65    8.17
  -1   4   1  307.26    7.86
  -1   4   1  315.17    7.75
   1  -4  -1  306.45    7.95
  -1   4   1  332.83    7.57
   1  -4  -1  338.89    8.14
  -1   4   1  313.68    7.71
   2   1  -4  214.96    7.21
  -2  -1   4  229.62    5.88
   2   1  -4  232.47    5.86
   2   1  -4  225.34    6.71
   2   1  -4  232.10    5.87
  -2  -1   4  240.40    5.88
   2   1  -4  240.96    5.91
  -2  -1   4  231.32    5.86
  -2  -1   4  240.40    6.04
   2   1  -4  236.64    5.86
  -2  -1   4  229.24    6.76
  -2  -1   4  250.91    6.90
  -2  -1   4  239.32    5.87
   2   1  -4  237.23    6.28
   2   4   2  308.29    7.63
   2   4   2  312.72    8.31
   2   4   2  297.55    7.60
  -2  -4  -2  305.26    7.64
  -2  -4  -2  317.70    7.90
   2   4   2  320.71    7.70
   2   4   2  300.21    7.91
  -2  -4  -2  313.50    7.78
   2   4   2  281.63    8.23
  -2  -4  -2  311.13    7.93
   2   4   2  310.57    7.66
   2   4   1  192.74    5.98
   2   4   1  206.33    5.58
  -2  -4  -1  218.33    5.38
   2   4   1  206.48    5.26
  -2  -4  -1  215.94    5.53
  -2  -4  -1  208.57    5.50
   2   4   1  207.83    5.32
  -2  -4  -1  198.53    5.28
   2   4   1  191.67    6.22
   2   4   1  212.97    5.44
  -2  -4  -1  219.81    5.49
   2   4   1  209.49    5.25
   2   4   1  211.97    5.29
  -2  -4  -1  220.88    5.78
  -1  -4  -5   21.67    0.85
   1   4   5   22.73    1.09
  -1  -4  -5   19.79    0.80
  -1  -4  -5   23.37    1.38
  -1  -4  -5   24.04    1.25
  -1  -4  -5   19.81    1.55
   1   4   5   21.52    1.23
   1   4   5   21.58    0.90
  -1  -4  -5   21.93    0.79
  -1  -4  -5   21.92    0.93
   1   4   5   22.28    1.11
   1   4   5   20.94    0.88
   1   4   5   21.13    1.20
   2  -1  -4  608.48   14.79
  -2   1   4  607.95   14.80
  -2   1   4  607.77   15.49
   2  -1  -4  575.41   15.99
  -2   1   4  632.02   14.93
  -2   1   4  598.10   14.90
   2  -1  -4  621.72   15.00
   2  -1  -4  620.62   14.89
  -2   1   4  618.26   14.88
   2  -1  -4  589.12   15.84
   2  -1  -4  593.15   14.99
  -2   1   4  636.67   15.43
   2  -2  -3  772.39   19.14
   2  -2  -3  818.04   19.24
   2  -2  -3  778.57   19.25
   2  -2  -3  783.59   19.33
   2  -2  -3  792.05   20.07
  -2   2   3  813.45   19.27
  -2   2   3  840.98   19.40
  -2   2   3  798.74   19.15
  -2   2   3  819.28   19.55
   2  -2  -3  784.56   19.41
  -2   2   3  793.49   19.25
   2  -2  -3  749.27   20.07
  -1   4   2   40.11    1.49
   1  -4  -2   35.35    1.76
  -1   4   2   39.26    1.23
  -1   4   2   40.24    1.09
   1  -4  -2   41.07    1.54
   1  -4  -2   39.82    1.43
   1  -4  -2   35.22    1.53
   1  -4  -2   38.20    1.26
  -1   4   2   39.25    1.27
  -1   4   2   40.17    1.30
  -1   4   2   40.19    1.53
   1  -4  -2   36.74    1.73
   1  -4  -2   41.86    1.79
   1  -2   5   24.02    0.83
   1  -2   5   26.36    2.35
  -1   2  -5   23.96    0.65
   1  -2   5   23.46    0.75
   1  -2   5   21.79    1.80
   1  -2   5   20.06    0.52
   1  -2   5   22.01    1.14
   1  -2   5   23.14    0.93
  -1   2  -5   23.34    0.83
  -1   2  -5   24.55    1.02
   1  -2   5   28.03    2.05
   1  -2   5   20.97    1.81
  -1   2  -5   24.50    1.22
   1  -2   5   24.08    0.61
   1  -4   0  302.19    7.70
  -1   4   0  313.62    7.52
  -1   4   0  317.74    8.10
   1  -4   0  307.08    8.16
   1  -4   0  301.61    8.04
  -1   4   0  303.10    7.93
   1  -4   0  317.49    7.92
  -1   4   0  308.86    7.95
  -1   4   0  315.71    7.95
   1  -4   0  305.27    8.18
   1  -4   0  310.95    8.40
  -1   4   0  324.19    7.76
  -1   4   0  317.26    7.67
   1  -4   0  328.81    7.72
   1   3  -4   24.46    0.92
   1   3  -4   24.05    0.83
   1   3  -4   23.27    0.72
   1   3  -4   25.24    1.25
   1   3  -4   24.23    2.42
   1   3  -4   24.46    0.74
  -1  -3   4   22.89    1.84
  -1  -3   4   25.72    0.80
  -1  -3   4   23.10    1.00
  -1  -3   4   25.60    0.76
  -1  -3   4   23.10    1.34
  -1  -3   4   23.62    0.90
   1   3  -4   25.65    0.80
  -1  -3   4   24.53    2.22
   1   3  -4   22.01    1.61
   1   3  -4   24.76    2.09
   1  -1   6   92.41    2.42
   1  -1   6   97.14    2.41
  -1   1  -6   94.72    2.44
  -1   1  -6   95.25    3.19
   1  -1   6   93.05    3.49
   1  -1   6   94.78    2.45
   1  -1   6   98.61    2.43
   1  -1   6   95.46    2.38
  -1   1  -6   97.86    3.09
   1  -1   6   93.86    3.78
   1  -1   6   95.67    2.60
  -1   1  -6   98.91    2.69
   1  -1   6   88.99    2.69
   1  -1   6   87.19    3.87
   0  -1  -7  102.69    2.40
   0   1   7   85.98    2.43
   0   1   7   85.72    2.43
   0   1   7   81.03    3.53
   0   1   7   88.93    2.46
   0   1   7   81.05    3.03
   0   1   7   91.90    2.31
   0  -1  -7   72.92    3.66
   0  -1  -7   82.02    2.64
   0  -1  -7   98.80    2.49
   0  -1  -7   82.62    3.86
   0   1   7   84.87    3.50
  -2  -3  -5   72.13    1.90
   2   3   5   71.55    2.12
   2   3   5   71.98    2.29
   2   3   5   71.88    2.11
   2   3   5   70.46    2.07
   2   3   5   70.37    2.08
   2   3   5   74.43    2.29
  -2  -3  -5   73.49    2.01
  -2  -3  -5   66.21    2.73
  -2  -3  -5   60.01    2.30
   2   3   5   67.87    2.06
  -2  -4  -3  174.93    4.53
  -2  -4  -3  190.10    4.77
  -2  -4  -3  184.77    5.11
   2   4   3  201.61    4.90
  -2  -4  -3  200.99    4.73
   2   4   3  169.28    5.18
   2   4   3  187.82    4.95
   2   4   3  196.99    4.83
   2   4   3  179.72    4.76
   2   4   3  187.25    4.71
  -2  -4  -3  186.46    4.91
  -2  -4  -3  157.72    4.58
  -2  -4  -3  191.72    4.72
  -2  -4  -3  187.11    5.08
   0  -4  -5    4.83    0.64
   0   4   5    4.50    0.39
   0   4   5    4.73    0.70
   0  -4  -5    4.29    1.04
   0  -4  -5    4.79    0.86
   0   4   5    4.76    0.65
   0   4   5    3.05    0.79
   0  -4  -5    5.53    1.24
   0   4   5    3.90    0.67
   0  -4  -5    4.38    0.65
   0  -4  -5    4.82    0.49
   0  -4  -5    3.52    0.96
   0   4   5    5.01    0.61
  -1   3   5  154.02    4.53
  -1   3   5  156.69    4.26
  -1   3   5  156.27    3.94
  -1   3   5  149.77    4.11
   1  -3  -5  148.95    3.88
  -1   3   5  151.00    4.20
   1  -3  -5  140.14    4.97
  -1   3   5  145.56    4.45
   1  -3  -5  151.95    4.27
   1  -3  -5  151.14    3.98
  -1   3   5  151.70    3.86
   1  -3  -5  145.19    4.18
  -1   3   5  155.87    3.97
   1  -3  -5  148.47    3.91
  -2  -4   0    0.21    1.07
   2   4   0    0.43    0.99
   2   4   0    0.21    0.26
   2   4   0    0.13    0.39
  -2  -4   0    0.18    0.55
   2   4   0    0.23    0.26
  -2  -4   0    0.40    0.30
   2   4   0   -0.52    0.54
  -2  -4   0    0.65    0.46
   2   4   0    0.37    0.38
  -2  -4   0    0.74    0.37
  -2  -4   0    0.45    0.58
   1   1   7   15.10    0.50
   1   1   7   19.16    1.84
   1   1   7   16.66    0.52
  -1  -1  -7   13.61    1.07
   1   1   7   15.22    0.50
   1   1   7   18.68    1.86
  -1  -1  -7   18.75    0.58
  -1  -1  -7   16.24    1.80
   1   1   7   17.23    0.70
  -1  -1  -7   16.34    1.64
   1   1   7   17.67    1.15
   1   1   7   17.47    0.70
   1   1   7   17.85    0.72
   1   1   7   15.14    0.68
  -1   2   6  164.33    4.09
  -1   2   6  147.97    4.65
  -1   2   6  163.19    4.25
  -1   2   6  164.69    5.00
   1  -2  -6  156.55    4.33
  -1   2   6  160.65    4.18
  -1   2   6  164.40    4.02
  -1   2   6  163.98    4.92
   1  -2  -6  165.04    4.14
   1  -2  -6  163.71    4.16
   1  -2  -6  160.37    4.28
   1  -2  -6  144.53    5.36
   1  -2  -6  145.24    4.17
   2  -2   3   60.55    1.62
  -2   2  -3   64.05    1.86
  -2   2  -3   63.38    1.72
   2  -2   3   64.21    1.99
   2  -2   3   64.58    1.97
   2  -2   3   63.16    1.58
  -2   2  -3   65.07    1.83
   2  -2   3   65.75    1.72
   2  -2   3   60.91    2.19
   2  -2   3   61.37    2.22
   2  -2   3   66.02    1.71
   2  -2   3   64.51    1.93
   2  -2   3   68.01    2.14
   0   0   7   55.23    2.99
   0   0   7   52.69    2.92
   0   0  -7   46.04    3.00
   0   0   7   59.00    1.69
   0   0  -7   63.54    1.71
   0   0   7   60.62    1.51
   0   0   7   56.66    1.67
   0   0  -7   58.98    2.25
   0   0   7   61.27    1.79
   0   0  -7   62.25    1.75
   0   0  -7   53.79    2.94
   0  -2  -7  292.28    6.53
   0  -2  -7  256.83    6.22
   0   2   7  250.82    6.22
   0  -2  -7  248.46    7.90
   0   2   7  253.34    6.60
   0  -2  -7  244.35    7.93
   0   2   7  271.70    6.54
   0  -2  -7  285.46    6.55
   0   2   7  254.58    7.43
   0   2   7  267.49    7.39
   0   2   7  270.10    6.48
   1   1  -6    1.63    1.75
  -1  -1   6    1.05    1.48
  -1  -1   6    2.21    0.39
   1   1  -6    2.01    0.16
   1   1  -6    1.85    0.32
   1   1  -6    2.00    0.37
  -1  -1   6    1.83    0.48
  -1  -1   6    2.38    0.30
   1   1  -6   -0.06    1.23
   1   1  -6    1.84    0.31
  -1  -1   6    2.29    0.28
   1   1  -6    2.03    0.95
  -1  -2  -7   11.75    0.96
   1   2   7   14.37    1.37
   1   2   7   11.08    0.62
   1   2   7   11.67    0.71
  -1  -2  -7   10.50    1.55
  -1  -2  -7    8.26    1.61
   1   2   7   13.66    1.00
   1   2   7   12.70    0.65
  -1  -2  -7   13.16    0.56
   1   2   7   13.14    0.61
   1   2   7   12.83    1.56
   1  -4  -3    9.59    1.09
   1  -4  -3   11.91    1.23
   1  -4  -3   12.02    0.91
  -1   4   3   13.20    0.80
   1  -4  -3   11.59    0.97
  -1   4   3   10.46    0.80
  -1   4   3   10.64    0.90
  -1   4   3   12.61    0.60
  -1   4   3   11.40    0.47
   1  -4  -3   11.72    0.65
   1  -4  -3   10.80    0.63
  -1   4   3   10.25    0.72
   1  -4   1  247.84    7.43
   1  -4   1  248.10    6.71
  -1   4  -1  262.39    6.61
  -1   4  -1  262.12    6.52
  -1   4  -1  264.27    6.22
  -1   4  -1  233.80    6.47
   1  -4   1  250.93    6.24
   1  -4   1  269.61    6.51
  -1   4  -1  248.62    6.32
   1  -4   1  245.90    6.61
   1  -4   1  235.77    6.95
   1   5   2   91.23    3.09
   1   5   2   87.84    2.51
   1   5   2   90.32    2.43
  -1  -5  -2   91.12    2.76
  -1  -5  -2   87.17    2.93
  -1  -5  -2   88.47    2.58
   1   5   2   88.03    3.40
  -1  -5  -2   85.13    2.50
  -1  -5  -2   82.36    2.82
   1   5   2   86.53    2.59
   1   5   2   78.60    2.67
   2   1   6   57.83    2.59
   2   1   6   59.94    1.69
   2   1   6   57.31    2.55
   2   1   6   58.23    1.67
   2   1   6   63.06    1.98
   2   1   6   62.30    1.69
   2   1   6   65.88    1.75
   2   1   6   60.63    1.76
   2   1   6   54.05    1.77
  -2  -1  -6   60.34    2.47
   2   1   6   60.21    1.74
   2   1   6   55.07    2.58
   2   1   6   63.12    1.77
   2   4   4    7.80    0.68
   2   4   4    9.28    0.67
  -2  -4  -4    7.61    0.54
  -2  -4  -4    7.00    1.01
  -2  -4  -4    7.92    0.77
   2   4   4    6.87    0.96
   2   4   4    8.26    0.70
  -2  -4  -4    6.19    0.87
  -2  -4  -4    6.98    0.52
   2   4   4    9.43    0.80
   2   4   4    7.04    0.56
  -2  -4  -4    7.77    0.50
  -2  -2  -6  125.31    3.21
  -2  -2  -6  123.69    4.00
   2   2   6  111.10    3.06
   2   2   6  114.08    2.89
   2   2   6  108.60    3.41
   2   2   6  111.10    3.06
   2   2   6  115.12    2.93
  -2  -2  -6  112.93    3.60
   2   2   6  105.39    2.97
   2   2   6  115.24    3.48
   2   2   6  119.05    3.68
   2   2   6  112.57    3.08
   2   2   6  116.54    3.24
   1   5   1  126.15    3.58
   1   5   1  136.13    4.17
   1   5   1  133.40    4.62
  -1  -5  -1  125.63    3.52
  -1  -5  -1  133.29    3.85
   1   5   1  133.09    3.36
   1   5   1  132.22    3.44
  -1  -5  -1  125.92    4.05
  -1  -5  -1  123.67    3.65
   1   5   1  138.85    3.71
  -1  -5  -1  130.23    3.84
  -1  -5  -1  133.05    3.76
   1   5   1  131.52    3.45
   1   5   1  132.50    3.53
   1   5   1  134.43    3.77
   0   4  -3   63.87    1.87
   0  -4   3   61.20    2.81
   0  -4   3   61.52    1.80
   0  -4   3   64.66    2.09
   0  -4   3   62.97    2.18
   0   4  -3   64.38    1.62
   0  -4   3   61.11    2.99
   0   4  -3   55.77    2.55
   0   4  -3   65.43    2.43
   0  -4   3   64.96    1.94
   0   4  -3   65.69    2.33
   0   4  -3   65.39    1.87
   1  -3   4  236.31    6.14
  -1   3  -4  235.49    6.08
   1  -3   4  240.53    5.97
   1  -3   4  228.48    5.98
   1  -3   4  206.50    7.08
  -1   3  -4  238.50    5.86
   1  -3   4  222.58    7.30
   1  -3   4  229.80    6.42
   1  -3   4  233.20    6.93
  -1   3  -4  248.97    6.27
   2   2  -4   15.91    0.65
   2   2  -4   14.43    1.96
  -2  -2   4   16.62    0.67
   2   2  -4   16.60    0.65
  -2  -2   4   17.02    0.73
  -2  -2   4   16.12    0.88
   2   2  -4   16.87    0.64
  -2  -2   4   18.84    1.81
   2   2  -4   17.59    0.78
  -2  -2   4   18.64    1.71
   2   2  -4   16.02    0.66
  -2  -2   4   15.63    0.66
   2   2  -4   16.15    1.20
   3   1   1   86.26    2.17
   3   1   1   86.60    2.45
   3   1   1   73.73    1.96
   3   1   1   88.16    2.34
   3   1   1   86.02    2.29
  -3  -1  -1   89.76    2.38
   3   1   1   85.48    2.24
   3   1   1   92.90    2.75
   3   1   1   83.44    2.25
  -1   0  -7   56.11    2.51
   1   0   7   53.70    2.16
   1   0   7   52.81    1.49
  -1   0  -7   58.11    1.54
   1   0   7   52.89    2.10
   1   0   7   51.71    2.89
  -1   0  -7   48.58    2.58
   1   0   7   54.05    1.55
   1   0   7   50.94    1.54
   1   0   7   55.39    1.43
   1   0   7   51.86    2.82
   1   0   7   53.61    1.54
  -1   0  -7   56.11    2.18
   0  -2   6   26.71    2.42
   0  -2   6   29.69    1.06
   0   2  -6   31.96    1.93
   0   2  -6   29.36    0.94
   0  -2   6   28.17    1.61
   0  -2   6   24.74    2.27
   0   2  -6   28.87    1.08
   0   2  -6   30.99    1.96
   0  -2   6   29.63    0.78
   0   2  -6   28.05    2.15
   0  -2   6   29.72    0.90
   0  -2   6   28.25    0.97
   1   5   3   54.96    2.28
   1   5   3   52.27    1.84
   1   5   3   61.03    2.49
  -1  -5  -3   54.90    1.79
  -1  -5  -3   54.77    2.05
   1   5   3   54.73    1.67
  -1  -5  -3   55.20    1.75
  -1  -5  -3   52.14    2.03
  -1  -5  -3   52.81    2.15
  -1  -5  -3   50.70    1.81
   1   5   3   54.15    1.81
  -1  -5  -3   53.32    1.90
   2  -3  -1    9.30    0.41
   2  -3  -1    7.84    1.02
   2  -3  -1    9.85    0.54
  -2   3   1    9.06    0.42
  -2   3   1    9.12    0.37
   2  -3  -1    8.75    0.72
   2  -3  -1    9.69    0.95
   2  -3  -1    9.75    0.79
  -2   3   1    9.99    0.51
  -2   3   1   10.25    0.64
  -2   3   1    9.03    0.73
  -2   3   0  279.17    7.17
   2  -3   0  278.45    6.86
  -2   3   0  286.47    7.22
   2  -3   0  288.76    7.54
  -2   3   0  302.19    7.24
   2  -3   0  273.19    7.44
   2  -3   0  257.36    7.21
  -2   3   0  286.76    7.02
  -2   3   0  291.06    6.86
   2  -3   0  282.48    7.09
   2  -3   0  281.08    7.02
  -2   3   0  285.75    6.91
   2  -3   0  274.14    7.31
   0  -5  -2    0.07    0.52
   0   5   2    0.49    0.60
   0  -5  -2    0.11    0.36
   0  -5  -2   -0.45    1.42
   0   5   2    0.14    0.31
   0   5   2    0.20    0.52
   0   5   2    0.36    0.58
   0  -5  -2   -0.44    0.90
   0   5   2    0.80    0.75
   0  -5  -2    0.48    0.60
   0   5   2    0.20    0.47
   0  -5  -2    0.02    0.49
   0  -5  -2    0.20    0.73
   2   4  -1   57.49    1.80
   2   4  -1   51.88    1.97
   2   4  -1   58.33    1.64
   2   4  -1   51.06    2.55
   2   4  -1   60.07    1.64
  -2  -4   1   59.15    1.87
  -2  -4   1   62.22    2.69
  -2  -4   1   56.54    1.74
  -2  -4   1   59.90    1.79
  -2  -4   1   61.25    1.84
  -2  -4   1   56.39    1.66
   2   4  -1   58.56    1.73
   0   5   1  143.81    4.35
   0  -5  -1  149.41    4.48
   0  -5  -1  153.74    4.88
   0   5   1  152.93    4.30
   0  -5  -1  143.92    4.42
   0  -5  -1  144.26    5.20
   0  -5  -1  155.51    4.06
   0   5   1  150.40    4.18
   0  -5  -1  146.38    4.16
   0   5   1  157.76    4.65
   0   5   1  161.55    3.94
   0   5   1  151.07    4.02
   0  -5  -1  153.85    3.93
   0  -5  -1  154.52    4.25
   2   3  -3  159.20    4.07
  -2  -3   3  163.86    4.10
  -2  -3   3  159.57    4.39
   2   3  -3  156.71    4.03
   2   3  -3  156.51    4.03
  -2  -3   3  160.31    4.16
   2   3  -3  158.47    4.08
   2   3  -3  164.27    5.22
   2   3  -3  131.49    4.79
  -2  -3   3  145.86    5.16
   2   3  -3  155.90    4.11
   2   3  -3  151.76    4.27
  -2  -3   3  167.18    4.13
  -2  -3   3  160.23    5.07
  -2  -3   3  161.51    4.18
  -2  -3   3  168.68    4.12
  -3  -1   0  177.30    4.51
  -3  -1   0  165.41    4.27
   3   1   0  175.84    4.66
   3   1   0  173.90    4.33
   3   1   0  171.21    4.42
   3   1   0  160.19    4.42
   3   1   0  186.01    5.13
  -3  -1   0  171.46    4.41
  -3  -1   0  180.16    4.48
  -2   2   4    1.11    0.54
  -2   2   4    1.68    0.34
  -2   2   4    2.30    0.80
   2  -2  -4    1.54    0.51
  -2   2   4    1.53    0.32
   2  -2  -4    2.52    1.23
   2  -2  -4    1.64    0.41
   2  -2  -4    1.31    0.36
   2  -2  -4    1.55    1.19
   2  -2  -4    2.29    0.61
  -2   2   4    2.24    0.46
   2  -2  -4    1.70    0.30
  -2   2   4    1.61    0.28
   3   1   2    1.12    0.47
  -3  -1  -2    0.79    0.34
   3   1   2    1.02    0.32
  -3  -1  -2    1.27    0.40
  -3  -1  -2    0.98    0.44
   3   1   2    0.96    0.41
   3   1   2    0.77    0.29
   3   1   2    0.63    0.33
   3   1   2    1.43    0.60
   3   1   2    0.85    0.14
   3   1   2    1.21    0.33
   1   4  -3    3.27    0.89
  -1  -4   3    3.54    0.33
  -1  -4   3    3.73    1.68
   1   4  -3    2.97    1.44
   1   4  -3    3.09    0.23
   1   4  -3    3.24    0.45
   1   4  -3    3.56    1.69
  -1  -4   3    2.35    0.46
   1   4  -3    2.94    0.48
  -1  -4   3    4.50    0.99
  -1  -4   3    3.42    0.56
   1   4  -3    3.20    0.28
  -1  -4   3    3.09    0.30
  -1  -4   3    2.95    0.46
   2  -1   5   15.76    1.13
   2  -1   5   15.75    0.57
  -2   1  -5   16.71    0.65
   2  -1   5   15.83    0.69
   2  -1   5   15.44    1.39
   2  -1   5   16.00    0.77
   2  -1   5   15.75    0.63
   2  -1   5   14.93    1.49
   2  -1   5   14.05    1.41
   2  -1   5   16.12    0.82
   2  -1   5   15.79    0.85
   2  -1   5   15.97    0.77
  -2   1  -5   14.76    0.63
   2   0  -5   13.45    0.89
  -2   0   5   12.84    0.61
   2   0  -5   13.53    0.57
  -2   0   5   15.13    1.49
  -2   0   5   13.29    0.62
  -2   0   5   13.04    0.59
  -2   0   5   13.27    0.70
   2   0  -5   12.75    0.59
  -2   0   5   13.40    1.50
   2   0  -5   13.06    0.73
   2   0  -5   13.46    0.60
  -2   0   5   13.52    0.63
   2   0  -5   12.25    0.62
   2   0  -5   11.43    1.94
   2   0  -5   13.75    1.74
  -3  -2  -1   58.53    1.84
  -3  -2  -1   59.86    1.80
   3   2   1   62.89    1.61
   3   2   1   56.11    1.98
   3   2   1   55.30    1.76
   3   2   1   61.45    1.72
   3   2   1   58.53    1.76
   3   2   1   59.49    1.84
   3   2   1   62.81    2.20
  -3  -2  -1   65.41    1.91
  -1  -5   0  408.97   10.36
   1   5   0  395.71   10.93
  -1  -5   0  453.08   10.50
   1   5   0  416.92   10.10
  -1  -5   0  402.70   10.84
   1   5   0  400.18   10.55
   1   5   0  403.43   10.06
   1   5   0  426.60   10.01
   1   5   0  395.79   10.39
  -1  -5   0  420.66   10.19
  -1  -5   0  420.37   10.83
   1   5   0  389.29   11.43
  -1  -5   0  426.75   10.51
   1   5   0  402.85   10.19
   1   5   0  385.80   10.25
   0   3  -5   36.79    1.00
   0   3  -5   40.43    2.16
   0  -3   5   33.31    2.25
   0  -3   5   33.59    2.61
   0  -3   5   31.26    0.87
   0  -3   5   37.41    0.98
   0   3  -5   31.85    1.99
   0  -3   5   35.36    1.21
   0   3  -5   33.76    0.88
   0  -3   5   30.17    1.90
   0   3  -5   35.19    1.39
   0  -3   5   37.06    1.33
   0  -3   5   34.78    1.30
  -1  -4  -6  657.35   15.81
  -1  -4  -6  620.86   16.50
  -1  -4  -6  639.39   15.69
   1   4   6  681.20   16.21
   1   4   6  620.62   16.03
   1   4   6  659.33   16.31
   1   4   6  637.10   15.83
   1   4   6  631.96   16.12
  -1  -4  -6  590.24   16.82
   1   4   6  658.50   15.50
  -1  -4  -6  632.13   16.39
   3   2   2   70.91    2.03
   3   2   2   70.77    1.96
   3   2   2   67.27    2.01
  -3  -2  -2   66.42    2.04
   3   2   2   69.97    1.82
   3   2   2   64.24    2.13
   3   2   2   68.92    1.90
  -3  -2  -2   70.02    2.05
   3   2   2   66.20    1.99
   3   2   2   59.65    2.05
   2  -3  -2  291.22    8.33
   2  -3  -2  300.70    7.49
   2  -3  -2  297.56    7.78
   2  -3  -2  294.74    7.98
  -2   3   2  321.22    7.83
  -2   3   2  317.71    7.52
  -2   3   2  299.87    7.47
   2  -3  -2  293.46    7.91
  -2   3   2  315.53    7.73
  -2   3   2  306.95    7.84
  -2   3   2  316.75    7.63
   2  -3  -2  302.04    8.27
   2  -3  -2  307.98    7.65
   2  -3  -2  303.33    7.76
   2  -3   1   19.59    1.20
  -2   3  -1   19.99    0.69
   2  -3   1   21.35    1.09
  -2   3  -1   19.03    0.85
   2  -3   1   16.17    0.52
   2  -3   1   19.81    0.95
   2  -3   1   21.02    1.14
   2  -3   1   18.72    0.99
  -2   3  -1   20.41    0.87
   2  -3   1   22.10    1.18
  -2   3  -1   20.25    0.64
   2  -3   1   21.89    0.79
   2  -3   1   20.67    0.72
   0   5   3    5.48    0.72
   0  -5  -3    4.36    0.80
   0  -5  -3    6.15    1.59
   0   5   3    5.15    0.75
   0   5   3    3.80    0.82
   0   5   3    5.63    0.63
   0   5   3    5.19    0.78
   0  -5  -3    4.97    0.96
   0  -5  -3    4.13    0.82
   0   5   3    6.69    0.49
   0  -5  -3    5.19    0.82
   0  -5  -3    5.95    0.52
   0  -5  -3    5.37    0.68
   0  -5  -3    6.02    0.68
   0   5   3    6.10    0.42
   0  -5  -3    5.99    0.84
  -1   4   4   51.10    1.60
  -1   4   4   52.46    1.75
  -1   4   4   56.45    1.78
   1  -4  -4   48.86    1.86
  -1   4   4   53.80    1.85
   1  -4  -4   50.61    1.63
  -1   4   4   51.99    1.64
   1  -4  -4   48.03    2.37
  -1   4   4   50.67    1.99
   1  -4  -4   49.90    1.60
  -1   4   4   55.64    1.49
   1  -4  -4   54.68    2.13
  -3   0  -1    2.88    0.37
   3   0   1    3.21    0.79
   3   0   1    2.85    0.50
  -3   0  -1    2.63    0.43
   3   0   1    2.74    0.38
   3   0   1    2.60    0.48
  -3   0  -1    2.33    0.37
  -3   0  -1    2.18    0.35
   3   0   1    3.88    0.30
   3   0   1    2.42    0.44
  -1  -3  -7   37.33    1.21
   1   3   7   37.10    1.70
   1   3   7   35.64    1.73
  -1  -3  -7   37.74    1.34
  -1  -3  -7   37.59    2.28
   1   3   7   36.44    1.38
   1   3   7   34.39    1.97
  -1  -3  -7   34.31    2.34
  -1  -3  -7   36.39    1.03
   1   3   7   34.99    1.40
   1   3   7   36.13    1.53
   1   3   7   35.43    1.25
   1   3   7   33.55    1.22
   0   5   0    0.88    0.50
   0   5   0    2.03    0.29
   0   5   0    1.46    0.19
   0  -5   0    1.21    0.74
   0   5   0    2.24    0.82
   0   5   0    1.45    0.85
   0  -5   0    2.20    1.54
   0  -5   0    0.48    0.48
   0  -5   0    3.33    1.76
   0  -5   0    1.42    0.69
   0   5   0    1.23    0.42
   0   5   0    2.73    0.62
   0  -5   0    0.91    0.60
   1  -4   2    0.97    0.45
   1  -4   2    0.69    0.60
  -1   4  -2    1.11    0.48
  -1   4  -2    0.80    0.15
  -1   4  -2    0.50    0.40
   1  -4   2    2.57    1.44
  -1   4  -2    0.61    0.54
  -1   4  -2    0.32    0.50
   1  -4   2    0.52    0.20
  -1   4  -2    0.38    0.32
   1  -4   2    0.42    0.88
   1  -4   2    0.54    0.54
  -3   0   0   38.37    1.19
   3   0   0   38.17    1.23
   3   0   0   31.14    1.29
   3   0   0   37.60    1.29
   3   0   0   36.58    1.74
   3   0   0   36.93    1.35
  -3   0   0   37.54    1.37
   3   0   0   36.36    1.39
   3   0   0   38.11    1.13
  -3   0   0   40.00    1.33
  -3  -2   0   96.82    2.56
   3   2   0   93.69    2.88
   3   2   0   89.37    3.19
   3   2   0   97.06    2.42
   3   2   0   95.88    2.52
  -3  -2   0   92.52    2.64
   3   2   0   94.60    2.64
   3   2   0   83.96    2.62
   2   0   6  775.78   18.49
   2   0   6  775.53   18.56
   2   0   6  759.51   18.47
   2   0   6  769.73   18.56
   2   0   6  770.35   18.76
   2   0   6  778.51   18.47
   2   0   6  704.49   19.62
   2   0   6  763.73   19.62
   2   0   6  729.15   18.83
   2   0   6  735.00   19.56
   2   0   6  765.93   18.49
   0   1  -7    2.39    0.99
   0   1  -7    2.24    0.15
   0  -1   7    2.19    0.68
   0   1  -7    1.98    0.38
   0  -1   7    2.36    0.43
   0  -1   7    2.32    0.24
   0  -1   7    0.68    1.74
   0   1  -7    2.07    0.30
   0  -1   7    1.93    0.13
   0   1  -7    2.41    1.69
   0  -1   7    2.68    0.31
   0  -1   7    4.60    1.67
  -2   1   5   -0.05    1.06
  -2   1   5   -0.02    0.35
   2  -1  -5    0.31    0.49
   2  -1  -5    0.02    0.31
   2  -1  -5    0.20    0.43
  -2   1   5   -0.07    0.40
   2  -1  -5    0.31    0.36
   2  -1  -5   -0.69    1.47
  -2   1   5    0.25    0.31
   2  -1  -5    0.21    1.31
   2  -1  -5    0.10    0.35
  -2   1   5   -0.09    0.92
  -2  -3  -6   24.12    0.90
   2   3   6   22.88    0.97
  -2  -3  -6   24.11    1.41
   2   3   6   23.92    1.02
   2   3   6   23.63    1.37
  -2  -3  -6   26.89    1.88
   2   3   6   22.33    0.97
   2   3   6   23.79    0.94
   2   3   6   22.65    1.24
   2   3   6   22.73    0.95
   2   3   6   24.16    0.98
  -2  -3  -6   25.29    0.76
  -2  -3  -6   24.12    1.13
   0   3   7  295.41    7.91
   0  -3  -7  299.05    7.31
   0   3   7  295.94    7.69
   0   3   7  289.79    7.30
   0  -3  -7  275.89    8.44
   0   3   7  259.59    7.19
   0   3   7  283.40    7.44
   0  -3  -7  298.42    7.12
   0   3   7  291.32    8.07
   0  -3  -7  243.60    8.57
   0  -3  -7  293.05    7.32
   0   3   7  301.30    7.13
  -3  -1   1  240.82    6.17
  -3  -1   1  241.05    6.27
   3   1  -1  229.96    6.37
  -3  -1   1  264.74    6.00
   3   1  -1  239.40    6.05
  -3  -1   1  235.52    6.19
   3   1  -1  242.05    6.12
  -3  -1   1  238.27    6.11
   3   1  -1  245.42    6.16
   3   1  -1  239.62    6.97
   3   1  -1  233.07    6.19
   1   5   4   63.33    2.08
  -1  -5  -4   57.60    1.88
   1   5   4   60.16    1.84
  -1  -5  -4   56.32    2.03
   1   5   4   62.80    2.41
  -1  -5  -4   56.19    1.88
  -1  -5  -4   59.59    2.25
  -1  -5  -4   55.89    2.43
   1   5   4   63.19    2.14
  -1  -5  -4   61.52    2.15
   1   5   4   56.07    2.16
  -1  -5  -4   62.96    2.12
  -1  -5  -4   54.54    2.33
   1   5   4   56.78    2.06
   2   1  -5   99.98    2.67
  -2  -1   5  101.26    2.72
   2   1  -5  104.80    2.74
   2   1  -5   93.22    4.25
   2   1  -5  106.72    3.27
   2   1  -5   97.62    2.71
   2   1  -5   96.86    3.73
  -2  -1   5  101.81    2.74
  -2  -1   5   95.13    3.73
  -2  -1   5  104.20    2.74
   2   1  -5   99.44    2.74
  -2  -1   5  101.73    2.70
  -2  -1   5  105.96    2.91
  -2  -1   5  107.13    3.88
   0   4   6  224.86    6.13
   0  -4  -6  242.57    6.89
   0  -4  -6  232.14    5.88
   0  -4  -6  232.90    6.00
   0   4   6  237.42    5.81
   0   4   6  225.05    5.99
   0  -4  -6  227.59    5.63
   0  -4  -6  231.98    5.97
   0  -4  -6  194.27    6.93
   0   4   6  227.96    6.40
   0   4   6  225.18    6.04
   0  -4  -6  221.48    6.15
   0   4   6  229.42    6.20
   0   4   6  231.95    5.90
   2  -2   4    0.28    1.01
   2  -2   4    0.40    0.11
   2  -2   4    0.24    0.45
   2  -2   4    0.45    0.42
   2  -2   4    0.45    0.34
   2  -2   4    0.53    0.20
  -2   2  -4    0.30    0.29
   2  -2   4    0.53    0.29
  -2   2  -4    0.72    0.33
   2  -2   4    0.90    0.63
   2  -2   4    0.32    0.15
  -2   2  -4    0.39    0.33
   2  -2   4   -0.60    0.90
   2  -2   4    0.84    0.88
   3   1   3   84.97    2.27
  -3  -1  -3   82.21    2.40
   3   1   3   78.98    2.47
   3   1   3   85.76    2.34
   3   1   3   84.90    2.49
  -3  -1  -3   86.69    2.44
   3   1   3   86.00    2.38
   3   1   3   83.78    2.41
  -3  -1  -3   85.55    2.50
   3   1   3   76.51    2.33
   3   1   3   88.06    2.20
   3   0   2   79.27    2.04
   3   0   2   73.34    2.47
   3   0   2   74.96    2.29
   3   0   2   77.51    2.14
   3   0   2   75.84    2.26
   3   0   2   71.18    2.05
  -3   0  -2   79.23    2.17
   3   0   2   76.86    2.24
  -3   0  -2   78.09    2.19
   2   4   5   83.18    2.91
  -2  -4  -5   81.62    2.88
   2   4   5   92.40    2.61
   2   4   5   91.27    2.79
  -2  -4  -5   88.73    2.57
  -2  -4  -5   98.65    2.57
  -2  -4  -5   96.57    3.38
   2   4   5   90.67    2.75
   2   4   5   92.81    2.74
  -2  -4  -5   87.43    2.42
   2   4   5   93.03    2.64
  -2  -4  -5   94.80    2.50
   2   4   5   88.34    2.74
  -3  -2  -3   20.04    0.95
   3   2   3   21.75    0.90
   3   2   3   19.42    0.76
   3   2   3   18.53    0.92
   3   2   3   18.30    0.75
  -3  -2  -3   19.23    0.85
   3   2   3   18.04    0.82
   3   2   3   17.79    0.79
   3   2   3   19.04    0.82
   3   0  -1   51.20    1.47
  -3   0   1   53.65    1.67
   3   0  -1   51.16    1.57
  -3   0   1   51.95    1.53
   3   0  -1   51.93    1.63
   3   0  -1   49.12    1.86
   3   0  -1   53.82    2.34
  -3   0   1   49.09    1.59
  -3   0   1   48.92    1.43
  -3   0   1   54.22    1.73
   3   0  -1   53.74    1.79
  -1   1   7    3.23    1.25
   1  -1  -7    3.38    0.44
  -1   1   7    1.99    1.39
  -1   1   7    2.50    0.37
   1  -1  -7    2.82    0.19
  -1   1   7    3.22    0.38
   1  -1  -7    2.35    1.58
   1  -1  -7    2.83    0.60
   1  -1  -7    2.19    0.49
   1  -1  -7    2.68    0.43
  -1   1   7    2.41    0.35
  -1   1   7    2.80    0.35
   1  -1  -7    3.43    1.74
  -1   3   6   73.61    2.36
   1  -3  -6   74.52    2.24
   1  -3  -6   73.31    2.43
  -1   3   6   80.96    2.60
   1  -3  -6   71.92    2.46
  -1   3   6   75.97    2.88
  -1   3   6   75.75    2.14
   1  -3  -6   76.91    2.12
  -1   3   6   82.29    2.67
   1  -3  -6   76.57    3.48
  -1   3   6   83.06    2.16
   1  -3  -6   76.78    2.14
  -1   3   6   80.18    2.24
  -1   3   6   77.68    2.85
   1   3  -5  163.97    5.67
  -1  -3   5  155.24    5.40
  -1  -3   5  164.54    4.31
  -1  -3   5  158.88    5.74
  -1  -3   5  162.77    4.05
   1   3  -5  152.27    4.00
  -1  -3   5  164.46    4.12
  -1  -3   5  161.33    4.65
   1   3  -5  160.41    4.57
   1   3  -5  154.69    6.24
   1   3  -5  154.26    4.03
   1   3  -5  161.27    5.18
  -1  -3   5  164.78    3.98
   1   3  -5  160.26    3.96
   1   2  -6    4.08    1.51
   1   2  -6    2.14    0.15
   1   2  -6    2.99    0.32
   1   2  -6    3.60    1.59
   1   2  -6    3.14    0.31
   1   2  -6    2.39    0.59
  -1  -2   6    3.33    0.28
  -1  -2   6    3.30    0.68
  -1  -2   6    3.16    0.30
  -1  -2   6    3.03    0.30
  -1  -2   6    3.95    1.74
   1   0  -7   25.84    1.46
  -1   0   7   28.41    0.95
   1   0  -7   25.91    0.94
   1   0  -7   20.26    2.08
  -1   0   7   27.27    2.17
   1   0  -7   27.92    0.98
   1   0  -7   25.80    0.95
  -1   0   7   27.07    0.95
  -1   0   7   29.52    1.03
   1   0  -7   25.09    0.80
  -1   0   7   27.33    0.83
  -1   0   7   25.71    2.22
   1   0  -7   24.64    2.60
  -1  -5   1    5.13    0.60
   1   5  -1    4.55    0.38
   1   5  -1    4.39    0.50
  -1  -5   1    5.43    1.36
   1   5  -1    5.21    0.98
  -1  -5   1    5.26    0.75
  -1  -5   1    5.33    0.73
   1   5  -1    5.08    0.35
   1   5  -1    4.45    0.31
  -1  -5   1    4.03    0.45
   1   5  -1    3.78    0.56
   1   5  -1    4.29    0.63
   1   5  -1    3.86    1.06
   1   5  -1    4.63    1.63
  -1  -5   1    3.06    1.08
   0  -5  -4   26.32    1.01
   0  -5  -4   25.33    1.17
   0  -5  -4   21.74    1.83
   0   5   4   24.49    1.27
   0   5   4   24.86    0.89
   0  -5  -4   26.18    1.33
   0   5   4   25.02    1.36
   0  -5  -4   24.88    1.33
   0  -5  -4   21.75    1.64
   0   5   4   23.29    0.94
   0  -5  -4   23.70    1.47
   0  -5  -4   22.88    1.13
   0   5   4   26.68    1.24
   0   5   4   23.23    1.31
   0   5   4   25.49    0.99
   0  -5  -4   24.34    1.43
   2  -3  -3    2.15    0.77
   2  -3  -3    1.79    0.42
  -2   3   3    2.33    0.41
   2  -3  -3    2.23    0.45
  -2   3   3    1.92    0.38
  -2   3   3    2.89    0.65
   2  -3  -3    2.10    0.48
   2  -3  -3    0.32    1.00
  -2   3   3    2.60    0.51
   2  -3  -3    2.29    0.34
  -2   3   3    2.27    0.44
  -2   3   3    2.26    0.43
  -2   3   3    1.76    0.26
   2  -3  -3    2.57    1.12
   2  -3   2   -0.25    0.76
  -2   3  -2   -0.08    0.45
  -2   3  -2   -0.24    0.32
   2  -3   2    0.37    0.65
   2  -3   2   -0.01    0.40
   2  -3   2    0.45    0.80
  -2   3  -2   -0.08    0.37
  -2   3  -2   -0.14    0.25
   2  -3   2   -0.23    0.26
  -2   3  -2    0.24    0.33
   2  -3   2    0.69    0.55
  -2   3  -2    0.15    0.21
   2  -3   2    0.47    0.75
  -1   2  -6    2.07    0.56
   1  -2   6    2.14    1.70
  -1   2  -6    1.75    0.34
   1  -2   6    1.38    0.15
   1  -2   6    1.55    0.70
   1  -2   6    1.80    0.48
   1  -2   6    1.87    1.61
   1  -2   6    1.76    0.21
  -1   2  -6    1.74    0.73
   1  -2   6    1.74    0.38
   1  -2   6    1.73    1.53
   0   5  -1  544.29   12.72
   0   5  -1  516.95   13.11
   0   5  -1  519.50   12.89
   0  -5   1  501.31   13.49
   0  -5   1  514.55   13.07
   0  -5   1  521.12   13.26
   0   5  -1  513.69   13.04
   0  -5   1  511.10   13.37
   0  -5   1  507.08   12.99
   0  -5   1  531.56   14.57
   0   5  -1  525.93   13.62
   0   5  -1  524.10   12.62
   3   2  -1   38.98    1.31
   3   2  -1   40.06    1.24
   3   2  -1   40.11    1.37
  -3  -2   1   44.80    1.33
   3   2  -1   36.17    1.34
   3   2  -1   41.17    1.69
  -3  -2   1   41.83    1.61
  -3  -2   1   40.73    1.37
   3   2  -1   39.26    1.29
   3   2  -1   41.60    1.18
  -3  -2   1   39.28    1.44
   3   2  -1   38.54    2.18
  -2  -4   2   80.35    2.66
  -2  -4   2   86.80    3.52
   2   4  -2   79.48    2.74
   2   4  -2   82.08    2.18
  -2  -4   2   82.51    2.39
  -2  -4   2   85.44    3.17
   2   4  -2   79.19    2.17
   2   4  -2   80.00    2.30
   2   4  -2   80.61    2.61
  -2  -4   2   78.27    2.27
  -2  -4   2   81.79    2.32
   2   4  -2   75.42    3.32
   2   4  -2   81.90    2.24
  -2  -4   2   80.43    2.25
  -2  -4   2   81.82    2.39
   2   4  -2   82.38    2.34
  -3  -3  -2  218.42    5.90
   3   3   2  224.06    5.77
   3   3   2  212.97    6.11
  -3  -3  -2  221.06    5.98
   3   3   2  228.68    5.70
   3   3   2  232.68    5.86
   3   3   2  231.69    5.74
   3   3   2  233.21    5.89
  -3  -3  -2  238.66    5.88
   3   3   2  228.06    5.90
   3   3   1   20.48    0.92
  -3  -3  -1   21.38    0.94
   3   3   1   21.69    0.80
  -3  -3  -1   20.21    0.97
   3   3   1   18.52    1.18
  -3  -3  -1   21.55    0.98
   3   3   1   18.98    0.92
   3   3   1   22.32    0.81
   1  -1   7 1248.41   29.90
  -1   1  -7 1225.13   30.67
  -1   1  -7 1308.98   30.18
   1  -1   7 1269.44   30.12
   1  -1   7 1200.43   31.75
   1  -1   7 1129.34   30.87
   1  -1   7 1252.09   29.95
  -1   1  -7 1246.38   29.89
   1  -1   7 1201.36   31.51
  -1   1  -7 1256.77   30.88
   3   0   3   18.92    0.71
   3   0   3   18.94    0.90
   3   0   3   19.82    0.90
  -3   0  -3   17.92    0.84
   3   0   3   20.22    0.70
  -3   0  -3   19.02    0.92
  -3   0  -3   19.44    0.82
   3   0   3   19.64    0.78
   3   0   3   19.72    0.85
   3   0   3   21.13    0.93
   3   1  -2   19.54    1.84
   3   1  -2   20.06    0.76
   3   1  -2   18.94    1.06
  -3  -1   2   21.15    0.94
   3   1  -2   19.71    0.90
   3   1  -2   20.93    0.85
  -3  -1   2   20.00    0.85
   3   1  -2   19.10    0.82
  -3  -1   2   20.16    1.27
  -3  -1   2   20.58    0.71
  -3  -1   2   20.79    0.97
  -3  -1   2   17.71    0.79
  -3  -1   2   20.72    0.87
   0  -4   4    5.86    0.76
   0  -4   4    6.79    0.32
   0  -4   4    6.72    0.71
   0   4  -4    8.04    1.15
   0   4  -4    6.86    0.56
   0   4  -4    6.77    0.46
   0   4  -4    5.37    0.86
   0  -4   4    4.76    1.44
   0  -4   4    7.11    0.59
   0   4  -4    6.61    0.30
  -1   2   7   24.44    1.52
  -1   2   7   26.31    0.86
   1  -2  -7   22.88    1.02
  -1   2   7   25.91    1.74
  -1   2   7   24.06    1.82
  -1   2   7   21.31    0.86
   1  -2  -7   24.75    1.12
   1  -2  -7   24.55    0.95
  -1   2   7   25.08    1.01
  -1   2   7   24.27    0.95
   1  -2  -7   24.56    0.97
   1  -2  -7   23.71    0.98
   1  -2  -7   20.38    2.22
   0  -1  -8   66.29    1.86
   0  -1  -8   56.92    3.30
   0   1   8   59.38    1.79
   0   1   8   58.54    3.14
   0  -1  -8   58.50    3.44
   0   1   8   53.73    2.46
   0  -1  -8   60.07    1.97
   0   1   8   60.65    1.76
   0   1   8   58.72    1.80
   0  -1  -8   69.89    1.71
   0   1   8   56.29    3.04
   3  -1   0   -0.02    0.46
  -3   1   0   -0.44    0.39
   3  -1   0    0.14    0.25
  -3   1   0    0.16    0.26
   3  -1   0   -0.55    0.73
   3  -1   0   -0.25    0.35
  -3   1   0   -0.17    0.31
   3  -1   0   -0.90    0.93
   3  -1   0   -0.11    0.44
   3  -1   0   -0.25    0.48
  -3   1   0    0.10    0.28
   3   2   4   20.80    0.86
   3   2   4   19.70    0.86
   3   2   4   21.26    0.87
  -3  -2  -4   20.04    1.09
   3   2   4   19.86    0.80
   3   2   4   18.66    0.92
   3   2   4   20.90    0.90
   3   2   4   19.90    0.86
  -3  -2  -4   19.46    0.87
   1   5   5  243.61    6.70
  -1  -5  -5  254.43    7.28
  -1  -5  -5  243.62    6.64
   1   5   5  252.10    6.72
  -1  -5  -5  241.70    6.80
   1   5   5  269.05    7.02
  -1  -5  -5  251.63    6.86
  -1  -5  -5  252.50    6.44
   1   5   5  250.93    6.45
  -1  -5  -5  249.67    6.41
   2   5   2   62.21    1.93
  -2  -5  -2   60.60    2.23
  -2  -5  -2   67.84    1.95
   2   5   2   63.63    2.21
   2   5   2   62.89    1.94
   2   5   2   60.61    2.32
   2   5   2   67.71    1.86
   2   5   2   60.76    2.09
  -2  -5  -2   60.91    2.37
  -2  -5  -2   67.65    2.20
   2   5   2   60.18    3.06
   2   5   2   67.68    1.93
  -2  -5  -2   62.32    2.23
   2   5   2   63.90    1.97
   3   1   4  207.75    5.14
   3   1   4  204.27    5.15
   3   1   4  206.89    5.10
   3   1   4  187.15    5.16
  -3  -1  -4  201.73    5.26
   3   1   4  202.77    5.28
   3   1   4  199.09    5.23
   3   1   4  208.18    5.20
  -3  -1  -4  204.31    5.43
   3   0  -2  161.07    4.29
  -3   0   2  159.41    3.91
   3   0  -2  156.38    4.07
  -3   0   2  167.87    4.32
   3   0  -2  157.27    5.20
   3   0  -2  160.05    4.20
  -3   0   2  163.88    4.18
  -3   0   2  161.05    4.25
  -3   0   2  154.84    4.11
   3   0  -2  156.14    4.66
  -3   0   2  159.89    4.18
  -1   4   5    0.37    0.25
   1  -4  -5    0.72    1.21
  -1   4   5   -0.11    0.80
  -1   4   5   -0.02    0.44
  -1   4   5    0.69    0.55
   1  -4  -5    0.55    0.44
   1  -4  -5    0.71    1.06
   1  -4  -5    0.21    0.66
   1  -4  -5    0.24    0.32
  -1   4   5    0.39    0.58
  -1   4   5    0.61    0.61
   1  -4  -5    0.39    0.63
   1  -4  -5   -0.18    0.90
   3  -1   1  108.78    3.09
  -3   1  -1  111.80    2.79
   3  -1   1  107.14    3.45
  -3   1  -1  108.87    2.94
   3  -1   1  110.86    2.78
   3  -1   1  113.50    2.93
   3  -1   1  109.59    3.10
   3  -1   1  106.32    3.10
   3  -1   1  108.81    2.99
  -3   1  -1  100.80    2.76
   3   3   3  162.68    4.15
   3   3   3  157.21    4.47
   3   3   3  160.66    4.30
  -3  -3  -3  160.07    4.41
  -3  -3  -3  156.37    4.23
   3   3   3  166.90    4.30
   3   3   3  159.41    4.16
   2  -2  -5   98.20    2.71
   2  -2  -5   91.13    3.91
   2  -2  -5   98.70    3.00
  -2   2   5   97.65    2.87
   2  -2  -5  102.82    2.86
  -2   2   5  100.90    3.32
   2  -2  -5   96.91    2.91
   2  -2  -5   91.37    4.01
  -2   2   5  104.23    2.79
  -2   2   5  100.41    2.69
  -2   2   5  104.83    2.84
   1  -4   3    0.08    1.57
  -1   4  -3    0.40    0.35
  -1   4  -3    0.16    0.50
   1  -4   3    0.09    0.89
   1  -4   3    1.00    0.55
  -1   4  -3    0.46    0.39
   1  -4   3    0.16    0.41
   1  -4   3    1.42    0.69
   2   2   7  161.20    4.27
  -2  -2  -7  158.94    5.30
  -2  -2  -7  176.24    4.58
   2   2   7  154.17    4.13
   2   2   7  153.54    4.26
   2   2   7  154.86    4.83
   2   2   7  166.56    4.20
   2   2   7  162.19    5.07
   2   2   7  159.84    4.06
   2   2   7  162.15    4.26
   2   2   7  170.14    4.09
   2   2   7  167.87    4.49
   3   3   0    0.51    0.40
   3   3   0    0.35    0.35
  -3  -3   0    0.69    0.40
  -3  -3   0    0.74    0.50
   3   3   0    0.84    0.35
  -3  -3   0    1.10    0.50
  -3  -3   0    0.79    0.57
   3   3   0    0.95    0.34
   3   3   0    1.70    0.75
  -3  -3   0    0.56    0.25
   3   3   0    0.28    0.80
   1  -3   5    2.91    0.89
  -1   3  -5    3.51    0.50
  -1   3  -5    4.01    0.65
   1  -3   5    3.21    1.56
   1  -3   5    3.19    2.11
   1  -3   5    3.07    0.46
   1  -3   5    3.43    1.54
  -1   3  -5    3.09    0.29
   1  -3   5    1.24    1.75
   1  -3   5    3.18    0.58
  -2  -5  -1   20.31    1.56
  -2  -5  -1   20.53    1.16
  -2  -5  -1   18.92    1.10
   2   5   1   19.32    0.89
   2   5   1   18.21    1.49
   2   5   1   19.19    0.88
   2   5   1   20.60    0.78
   2   5   1   18.71    1.02
   2   5   1   17.86    2.01
   2   5   1   19.33    0.81
   2   5   1   22.72    1.32
  -2  -5  -1   21.27    1.12
  -2  -5  -1   19.81    0.85
  -2  -5  -3    0.22    0.42
   2   5   3    0.07    0.41
   2   5   3   -0.05    0.40
  -2  -5  -3   -0.03    0.56
  -2  -5  -3    0.54    0.70
  -2  -5  -3   -0.20    0.50
  -2  -5  -3   -0.15    0.42
   2   5   3   -0.05    0.35
   2   5   3    0.06    1.37
   2   5   3    0.05    0.40
  -2  -5  -3    0.15    0.62
   2   5   3   -0.15    0.53
  -2  -5  -3   -0.49    0.77
   2   5   3   -0.11    0.71
   2   5   3   -0.12    0.58
  -2  -3   4   33.59    1.18
  -2  -3   4   33.03    1.19
   2   3  -4   30.81    1.04
   2   3  -4   32.90    2.27
   2   3  -4   31.99    1.04
  -2  -3   4   33.32    2.26
  -2  -3   4   34.15    1.41
  -2  -3   4   30.05    1.05
   2   3  -4   30.32    1.28
   2   3  -4   33.16    1.03
   2   3  -4   31.22    1.03
  -2  -3   4   32.60    1.07
  -2  -3   4   31.39    2.46
   1   1   8  166.79    5.70
   1   1   8  175.34    4.52
   1   1   8  172.47    4.51
  -1  -1  -8  161.00    5.88
   1   1   8  167.56    5.88
  -1  -1  -8  164.79    5.01
  -1  -1  -8  178.86    5.86
   1   1   8  168.67    4.50
  -1  -1  -8  181.30    4.33
   1   1   8  181.16    5.17
   2   1   7   78.46    2.43
   2   1   7   73.76    1.99
   2   1   7   68.40    2.09
   2   1   7   75.73    3.17
   2   1   7   78.42    2.07
   2   1   7   68.95    2.05
   2   1   7   74.66    2.01
   2   1   7   67.39    3.02
   2   1   7   73.06    2.09
  -2  -1  -7   70.72    3.04
   2   1   7   75.48    2.04
  -1  -2  -8   47.49    2.92
   1   2   8   51.42    1.73
   1   2   8   49.68    2.49
   1   2   8   50.45    1.60
   1   2   8   50.66    1.63
   1   2   8   49.39    2.69
  -1  -2  -8   56.37    1.52
  -1  -2  -8   55.29    2.09
  -1  -2  -8   47.98    2.95
   0   2   8    7.19    1.48
   0   2   8    6.71    0.58
   0  -2  -8    6.41    1.84
   0   2   8    7.40    0.55
   0   2   8    6.83    0.49
   0  -2  -8    8.32    0.54
   0  -2  -8    8.12    0.59
   0  -2  -8    5.06    1.86
  -3   1   1  116.28    2.87
   3  -1  -1  108.67    2.81
   3  -1  -1  104.34    2.91
  -3   1   1  108.55    3.03
   3  -1  -1  103.44    3.09
  -3   1   1  104.17    2.87
  -3   1   1  105.33    2.94
   3  -1  -1  105.53    3.67
   3  -1  -1  104.07    3.41
  -2  -2   5    7.47    0.46
   2   2  -5    7.82    1.16
   2   2  -5    6.50    0.55
  -2  -2   5    6.22    0.71
   2   2  -5    6.59    0.45
  -2  -2   5    8.55    1.70
   2   2  -5    6.07    1.95
  -2  -2   5    6.71    0.55
   2   2  -5    6.93    0.40
  -2  -2   5    8.37    1.72
  -2  -2   5    7.40    0.48
   2   2  -5    7.03    0.46
   2   2  -5    6.99    0.46
  -1  -4   4  374.35   11.13
  -1  -4   4  373.56   10.62
   1   4  -4  372.64    9.23
   1   4  -4  403.76   10.15
   1   4  -4  382.44    9.32
  -1  -4   4  393.47    9.37
  -1  -4   4  403.98    9.61
   1   4  -4  371.48    9.46
  -1  -4   4  386.31    9.54
   1   4  -4  428.89   11.44
  -1  -4   4  387.57    9.68
   1   1  -7  239.99    5.96
   1   1  -7  244.97    6.00
   1   1  -7  235.14    5.74
   1   1  -7  237.49    7.93
  -1  -1   7  240.87    6.09
   1   1  -7  236.94    6.02
  -1  -1   7  246.87    6.16
   1   1  -7  216.10    6.97
  -1  -1   7  225.90    7.48
  -1  -1   7  247.68    5.94
  -1  -1   7  248.71    5.98
   1   1  -7  238.90    7.44
   1   1  -7  233.39    5.79
   0   0  -8    8.21    1.69
   0   0  -8   10.50    0.55
   0   0  -8   10.62    2.13
   0   0   8    8.31    1.92
   0   0  -8    8.71    1.99
   0   0   8   10.62    0.52
   0   0  -8    9.33    0.99
   0   0   8    9.75    0.53
   3  -1   2   64.15    2.02
  -3   1  -2   64.45    1.94
   3  -1   2   67.84    1.78
  -3   1  -2   67.84    2.05
   3  -1   2   68.66    2.11
   3  -1   2   67.60    2.12
   3  -1   2   66.54    1.91
   2  -1   6  207.00    5.47
   2  -1   6  206.25    5.37
   2  -1   6  215.24    5.24
   2  -1   6  202.02    6.55
   2  -1   6  206.09    5.16
   2  -1   6  206.96    5.13
   2  -1   6  204.05    6.52
   2  -1   6  206.31    5.37
   2  -1   6  204.16    5.45
   2  -1   6  203.17    5.98
   2  -1   6  211.68    5.23
   2  -1   6  203.68    6.43
   2  -1   6  199.84    5.14
   0  -5  -5   31.41    1.19
   0  -5  -5   31.24    1.64
   0  -5  -5   29.81    1.41
   0   5   5   32.64    1.40
   0   5   5   29.07    1.49
   0   5   5   29.70    0.98
   0   5   5   30.85    1.15
   0   5   5   27.87    1.43
   0  -5  -5   33.53    1.24
   0  -5  -5   32.69    1.81
   0   5   5   30.53    1.06
   0  -5  -5   30.34    1.96
   1   4   7   -0.04    0.41
  -1  -4  -7    0.32    1.44
   1   4   7    0.58    0.72
  -1  -4  -7    0.88    0.95
   1   4   7    0.36    0.70
  -1  -4  -7    0.46    0.32
   1   4   7   -0.05    0.99
   1   4   7   -0.36    0.64
  -1  -4  -7    0.38    0.11
   1   4   7    0.35    0.40
  -1  -4  -7   -0.02    0.44
  -1  -4  -7   -0.12    1.27
  -3  -2   2  298.24    7.45
  -3  -2   2  293.81    7.81
  -3  -2   2  299.31    7.53
   3   2  -2  287.06    7.55
   3   2  -2  299.22    7.51
   3   2  -2  281.27    8.64
   3   2  -2  298.70    7.50
   3   2  -2  309.94    8.03
   3   2  -2  307.35    7.62
  -3  -2   2  308.95    7.58
  -3  -2   2  306.55    7.36
  -3  -2   2  298.88    8.00
  -2  -4  -6   22.30    0.73
  -2  -4  -6   22.48    0.92
  -2  -4  -6   21.22    1.22
   2   4   6   20.14    1.06
  -2  -4  -6   21.56    0.84
   2   4   6   23.10    1.22
  -2  -4  -6   21.13    1.89
   2   4   6   22.40    1.08
   2   4   6   19.32    1.34
   2   4   6   21.96    0.98
   2   4   6   21.09    1.22
   2  -3  -4   27.13    1.09
  -2   3   4   28.16    1.05
   2  -3  -4   26.98    1.38
   2  -3  -4   27.97    0.98
  -2   3   4   29.04    0.93
  -2   3   4   28.64    1.42
   2  -3  -4   26.60    1.93
  -2   3   4   27.60    1.12
   2  -3  -4   27.30    1.88
  -2   3   4   27.79    1.19
   2  -3  -4   26.52    1.10
  -2   3  -3    8.12    0.41
  -2   3  -3    8.77    0.61
   2  -3   3    6.89    1.01
  -2   3  -3    7.54    0.53
   2  -3   3    7.71    0.81
   2  -3   3    7.70    0.71
   2  -3   3    8.51    0.54
   1   5  -2   -0.13    0.25
  -1  -5   2    0.09    0.56
   1   5  -2    2.77    1.76
  -1  -5   2    1.75    1.57
   1   5  -2    0.15    0.97
  -1  -5   2    0.89    0.52
  -1  -5   2    0.03    0.61
   1   5  -2    0.05    0.21
   1   5  -2   -0.15    0.20
   1   5  -2   -0.77    0.53
  -1  -5   2    0.05    0.35
   1   5  -2    1.93    1.06
   0   5  -2   99.80    2.44
   0  -5   2  101.36    3.07
   0   5  -2   99.83    2.47
   0  -5   2   85.19    4.57
   0  -5   2   89.31    3.51
   0   5  -2   97.38    2.87
   0   5  -2  104.22    3.59
   0  -5   2   99.88    2.90
   0  -5   2   94.19    3.13
   0   5  -2  104.97    3.22
   0   5  -2   98.06    3.33
   0   5  -2   94.19    2.73
   0  -5   2   92.57    2.77
  -2  -5   0   29.47    1.33
   2   5   0   26.65    1.07
   2   5   0   27.81    0.94
   2   5   0   29.97    2.18
  -2  -5   0   27.75    1.26
   2   5   0   29.93    1.12
  -2  -5   0   27.83    2.02
   2   5   0   27.24    1.18
   2   5   0   24.50    2.37
  -2  -5   0   26.16    1.01
  -2  -5   0   27.30    1.39
   2   5   0   28.71    0.97
   2   0  -6  261.21    6.27
   2   0  -6  249.00    6.36
   2   0  -6  242.24    6.41
  -2   0   6  252.54    6.32
   2   0  -6  248.33    6.28
   2   0  -6  257.67    6.75
  -2   0   6  259.50    6.35
  -2   0   6  254.19    6.32
   2   0  -6  227.07    7.63
  -2   0   6  244.57    6.36
  -2   0   6  255.96    7.49
  -2   0   6  250.46    6.42
   2   0  -6  235.69    8.13
  -2  -5  -4   32.18    1.19
   2   5   4   31.57    1.56
   2   5   4   32.64    1.22
  -2  -5  -4   33.26    1.47
   2   5   4   28.82    2.06
   2   5   4   32.22    1.32
   2   5   4   29.99    1.36
  -2  -5  -4   32.97    1.77
  -2  -5  -4   30.51    1.18
   2   5   4   34.40    1.40
  -2  -5  -4   33.44    1.24
  -2  -5  -4   29.04    1.58
   3   3   4  188.65    4.93
   3   3   4  182.58    4.92
  -3  -3  -4  163.37    4.84
  -3  -3  -4  186.03    4.84
   3   3   4  210.70    4.92
   3   3   4  191.80    5.09
  -3  -3  -4  194.00    5.17
   2  -2   5    6.45    1.37
   2  -2   5    6.66    1.38
   2  -2   5    6.91    0.87
  -2   2  -5    7.57    0.50
   2  -2   5    8.03    0.60
   2  -2   5    8.36    1.63
   2  -2   5    7.84    0.67
   2  -2   5    7.64    0.49
   2  -2   5    8.25    1.45
  -2   2  -5    7.92    0.49
  -2   2  -5    7.99    0.53
  -3   0  -4   44.21    1.47
   3   0   4   44.94    1.84
   3   0   4   43.76    1.54
   3   0   4   49.64    1.71
   3   0   4   43.20    1.42
   3   0   4   48.49    1.34
   3   0   4   47.43    1.57
   3   0   4   46.65    1.41
   3   0   4   43.85    1.51
   3   0   4   44.86    1.49
  -3   0  -4   42.20    1.65
   3   0   4   44.51    1.36
   2   3   7   46.40    1.59
  -2  -3  -7   44.56    2.11
  -2  -3  -7   45.34    1.40
   2   3   7   43.37    1.50
   2   3   7   44.87    1.54
   2   3   7   43.87    1.49
   2   3   7   44.47    1.89
  -2  -3  -7   42.47    2.54
   2   3   7   41.21    2.04
  -2  -3  -7   44.10    1.80
   1  -5  -1   27.54    1.39
   1  -5  -1   28.67    2.29
  -1   5   1   28.08    1.04
   1  -5  -1   27.30    1.53
  -1   5   1   27.34    1.13
   1  -5  -1   27.11    1.00
   1  -5  -1   28.27    1.29
  -1   5   1   26.55    0.94
  -1   5   1   27.77    1.25
   1  -5  -1   26.98    1.09
  -1   5   1   26.51    1.32
   1  -5  -1   27.54    1.54
  -1   5   1   28.38    0.77
   3   3  -1   19.71    1.36
  -3  -3   1   19.67    0.74
  -3  -3   1   20.21    0.90
   3   3  -1   18.70    0.91
  -3  -3   1   18.91    1.22
  -3  -3   1   20.80    0.97
  -3  -3   1   19.17    1.27
   3   3  -1   20.66    1.64
   3   3  -1   20.00    0.85
  -3  -3   1   19.76    0.85
   3   3  -1   19.53    0.89
   3   3  -1   19.67    0.76
   3   3  -1   18.37    0.80
   0  -2   7    3.56    0.50
   0   2  -7    3.88    1.37
   0   2  -7    2.55    0.39
   0   2  -7    2.02    1.62
   0  -2   7    3.07    0.93
   0   2  -7    2.39    0.35
   0   2  -7    2.53    1.23
   0  -2   7    2.93    0.31
   1  -5  -2   24.86    1.58
   1  -5  -2   23.78    1.14
  -1   5   2   23.95    1.00
  -1   5   2   23.34    1.24
   1  -5  -2   22.10    1.25
   1  -5  -2   23.23    0.94
   1  -5  -2   23.61    1.97
  -1   5   2   26.06    0.76
  -1   5   2   25.58    0.92
   1  -5  -2   25.99    1.33
  -1   5   2   22.50    0.98
  -3   1   2   16.89    0.85
  -3   1   2   15.90    0.82
   3  -1  -2   16.42    1.65
   3  -1  -2   15.21    1.41
   3  -1  -2   17.65    0.69
  -3   1   2   16.35    0.68
   1   0   8  145.80    3.84
   1   0   8  141.85    5.44
   1   0   8  146.43    5.44
  -1   0  -8  155.63    4.61
   1   0   8  149.36    3.86
  -1   0  -8  147.63    5.24
   1   0   8  144.46    4.56
  -1   0  -8  154.43    3.82
  -1   0  -8  158.48    5.11
  -2   1   6    3.09    0.50
  -2   1   6    2.19    0.41
   2  -1  -6    3.38    1.81
   2  -1  -6    2.30    0.56
  -2   1   6    4.41    1.21
   2  -1  -6    2.49    0.45
  -2   1   6    2.14    0.40
   2  -1  -6    2.80    1.62
   2  -1  -6    3.07    0.60
   0   4   7 1083.91   26.91
   0   4   7 1069.83   26.63
   0   4   7 1135.62   26.39
   0   4   7 1121.46   26.31
   0   4   7 1152.55   26.68
   0  -4  -7 1055.44   26.05
   0  -4  -7 1099.48   26.35
   0  -4  -7 1146.84   26.50
   0  -4  -7 1035.24   27.55
   0   4   7 1075.68   26.42
   0  -3   6   87.41    2.26
   0  -3   6   87.92    2.52
   0  -3   6   86.20    2.48
   0   3  -6   87.53    2.29
   0  -3   6   81.22    3.26
   0   3  -6   87.76    3.40
   0   3  -6   85.12    2.60
   0   3  -6   86.94    3.24
   0  -3   6   87.39    2.64
   2   4  -3    1.43    0.30
  -2  -4   3    1.90    0.44
   2   4  -3    1.57    0.36
  -2  -4   3    1.85    0.36
   2   4  -3    1.99    0.30
   2   4  -3    1.25    1.44
  -2  -4   3    1.67    0.53
  -2  -4   3    1.78    0.48
   2   4  -3    1.90    0.47
  -2  -4   3    1.82    0.35
  -2  -4   3   -0.45    1.67
   2   4  -3    1.25    0.90
   2   4  -3    1.76    0.42
  -2  -4   3    2.82    1.45
   2   4  -3    2.81    0.74
   1   3   8   36.43    1.30
   1   3   8   38.52    1.50
  -1  -3  -8   36.03    2.68
   1   3   8   35.97    1.90
  -1  -3  -8   37.12    2.53
   1   3   8   35.55    2.15
   1   3   8   36.51    1.34
  -1  -3  -8   43.51    1.65
  -1  -3  -8   41.26    1.28
   2   0   7  873.52   22.93
   2   0   7  871.44   21.59
   2   0   7  874.66   22.24
   2   0   7  873.11   21.58
   2   0   7  896.45   21.96
   2   0   7  904.82   21.65
   2   0   7  894.29   23.08
   2   0   7  937.60   21.58
   2   0   7  899.66   21.57
   3   1  -3    2.36    0.96
   3   1  -3    1.56    0.41
  -3  -1   3    1.28    0.79
   3   1  -3    1.93    0.39
   3   1  -3    1.77    0.50
  -3  -1   3    1.69    0.39
   3   1  -3   -1.24    1.56
  -3  -1   3    1.18    0.96
  -3  -1   3    2.15    0.43
  -3  -1   3    1.86    0.33
   3   0  -3   11.90    0.70
  -3   0   3   14.41    0.53
  -3   0   3   13.70    0.75
  -3   0   3   12.79    0.63
   3   0  -3   12.19    0.81
   3   0  -3   12.27    0.88
  -3   0   3   12.73    0.69
   3   0  -3   11.29    1.41
   3   0  -3   12.07    1.68
  -3   0   3   11.52    0.90
  -3   0   3   16.13    1.26
   1  -5   0 1287.53   31.44
  -1   5   0 1366.78   31.37
  -1   5   0 1443.25   31.16
   1  -5   0 1346.91   31.10
  -1   5   0 1347.28   31.00
   1  -5   0 1303.66   31.03
  -1   5   0 1253.69   30.78
   1  -5   0 1319.34   31.36
  -1   5   0 1332.97   31.36
   1  -5   0 1362.04   31.74
  -1   5   0 1381.71   31.58
   3   2   5   81.96    2.30
   3   2   5   83.96    2.41
   3   2   5   79.15    2.33
   3   2   5   83.02    2.39
  -3  -2  -5   82.75    2.34
   3   2   5   76.54    2.37
  -3  -2  -5   81.98    2.72
   3   2   5   84.07    2.41
   3   2   5   83.03    2.31
  -3   1  -3   82.47    2.39
  -3   1  -3   76.22    2.28
   3  -1   3   82.27    2.36
   3  -1   3   83.46    2.25
   3  -1   3   80.76    2.45
   3  -1   3   97.92    2.77
   3  -1   3   80.00    2.48
   3   1   5   44.45    1.43
   3   1   5   46.76    1.44
   3   1   5   44.67    1.51
  -3  -1  -5   43.19    1.82
   3   1   5   46.67    1.49
   3   1   5   45.17    1.50
   3   1   5   44.59    1.45
   3   1   5   44.78    1.39
   3   1   5   45.59    1.64
   2   1  -6    7.31    0.51
   2   1  -6    8.93    1.09
   2   1  -6    7.56    1.62
  -2  -1   6    8.16    0.52
   2   1  -6    6.42    0.43
   2   1  -6    7.77    0.50
  -2  -1   6    6.39    0.45
   2   1  -6    4.81    2.08
  -2  -1   6    7.78    0.55
  -2  -1   6    7.04    0.48
   2   1  -6    6.75    0.54
  -2  -1   6    6.70    0.66
  -2  -1   6    7.10    1.72
  -1   5   3  190.44    5.39
   1  -5  -3  227.85    5.51
   1  -5  -3  193.36    5.12
  -1   5   3  199.88    5.41
  -1   5   3  192.22    5.07
   1  -5  -3  199.60    6.04
   1  -5  -3  189.06    5.55
  -1   5   3  200.05    4.91
  -1   5   3  203.94    5.09
  -1   5   3  196.55    5.15
   1  -5  -3  187.90    5.92
   1  -5  -3  183.81    5.80
  -1  -5  -6  318.60    8.96
  -1  -5  -6  350.12    8.44
  -1  -5  -6  338.75    9.17
   1   5   6  326.44    8.79
   1   5   6  328.05    8.85
  -1  -5  -6  342.62    8.33
  -1  -5  -6  314.76    9.50
   1   5   6  334.66    8.97
   0  -3  -8  174.85    6.75
   0   3   8  202.94    6.07
   0  -3  -8  219.35    5.38
   0  -3  -8  189.89    6.82
   0   3   8  211.43    5.37
   0  -3  -8  202.90    5.06
   0   3   8  205.59    5.28
   0   3   8  209.59    5.50
   1  -3  -7    1.74    0.34
   1  -3  -7    2.17    1.72
   1  -3  -7    2.42    0.73
  -1   3   7    1.25    0.30
   1  -3  -7    0.60    1.55
   1  -3  -7    1.72    0.69
   1  -3  -7    2.02    0.37
  -1   3   7    1.84    0.35
  -1   3   7    2.09    0.44
  -1   3   7    1.54    0.86
  -1   3   7    2.22    0.58
  -1   3   7    1.98    0.99
   3   4   2    8.78    0.74
   3   4   2    8.20    1.06
  -3  -4  -2    8.74    0.88
   3   4   2    9.82    0.61
  -3  -4  -2    9.27    0.74
  -3  -4  -2   10.36    0.75
  -2   4   1 1236.61   30.21
   2  -4  -1 1243.63   31.17
   2  -4  -1 1277.60   30.56
  -2   4   1 1252.58   30.55
   2  -4  -1 1243.92   30.33
   2  -4  -1 1214.93   30.98
  -2   4   1 1303.41   30.60
  -2   4   1 1279.89   30.54
  -2   4   1 1282.17   30.10
   2  -4  -1 1195.86   30.55
  -2   4   1 1265.27   30.30
  -2  -5   1   36.03    1.19
   2   5  -1   34.46    2.71
  -2  -5   1   36.70    1.47
  -2  -5   1   36.54    2.44
   2   5  -1   35.65    1.14
   2   5  -1   34.87    1.74
   2   5  -1   32.01    2.63
  -2  -5   1   34.54    1.48
   2   5  -1   36.86    1.14
   2   5  -1   37.63    1.41
   1  -4  -6   37.56    1.22
  -1   4   6   39.56    1.33
   1  -4  -6   37.90    1.75
   1  -4  -6   36.63    2.33
  -1   4   6   35.86    1.49
  -1   4   6   33.33    1.28
   1  -4  -6   36.17    2.51
  -1   4   6   38.21    1.60
   1  -4  -6   37.85    1.50
  -1   4   6   36.88    1.19
  -1   4   6   39.73    1.54
  -3  -4  -1   75.30    2.34
   3   4   1   76.20    2.46
   3   4   1   75.11    2.89
  -3  -4  -1   78.39    2.28
  -3  -4  -1   76.78    2.47
   3   4   1   78.04    2.34
   3   4   1   80.58    2.21
  -3  -4  -1   76.78    2.45
  -2   4   0   87.75    2.34
   2  -4   0   86.86    2.37
   2  -4   0   86.13    2.55
  -2   4   0   79.99    2.26
  -2   4   0   84.51    2.11
  -2   4   0   90.90    2.61
  -2   4   0   84.54    2.56
  -2   4   0   96.88    2.68
   2  -4   0   83.11    2.92
  -2  -5  -5  299.34    8.30
   2   5   5  279.92    7.65
   2   5   5  298.83    7.61
   2   5   5  295.92    8.31
  -2  -5  -5  285.72    7.54
  -2  -5  -5  285.88    7.81
   2   5   5  301.65    7.90
  -2  -5  -5  291.76    7.39
  -2  -5  -5  302.97    7.35
  -1   4  -4   19.54    0.81
   1  -4   4   20.19    0.93
   1  -4   4   21.16    1.16
   1  -4   4   23.62    1.56
  -1   4  -4   20.85    0.87
  -1   4  -4   21.16    1.07
  -1   4  -4   22.51    1.19
   3   4   3  149.73    4.64
  -3  -4  -3  163.48    4.43
  -3  -4  -3  164.32    4.24
   3   4   3  144.24    4.30
  -3  -4  -3  158.13    4.40
  -3  -4  -3  153.72    4.53
   3   4   3  165.47    4.18
   3   4   3  159.63    4.30
   0  -1   8  268.11    6.93
   0   1  -8  263.87    8.63
   0  -1   8  270.16    7.11
   0  -1   8  261.00    6.67
   0  -1   8  278.77    6.77
   0   1  -8  278.10    7.59
   0   1  -8  283.77    6.72
  -1  -3   6   17.57    0.96
   1   3  -6   17.26    2.75
   1   3  -6   19.87    0.64
   1   3  -6   18.81    1.20
   1   3  -6   19.02    0.72
  -1  -3   6   18.42    0.71
  -1  -3   6   18.02    1.27
   1   3  -6   21.79    2.28
   1   3  -6   16.57    1.77
   2  -4  -2   45.63    1.49
  -2   4   2   45.01    1.36
  -2   4   2   44.32    1.25
  -2   4   2   44.00    1.43
   2  -4  -2   44.60    2.16
  -2   4   2   49.76    1.69
   2  -4  -2   48.61    2.25
   2  -4  -2   44.44    1.59
  -2   4   2   45.79    1.73
  -1   5  -1   12.65    0.82
  -1   5  -1   12.00    0.87
  -1   5  -1   11.69    0.68
   1  -5   1   12.73    1.09
   1  -5   1   12.74    0.91
   1  -5   1   12.47    0.97
  -1   5  -1   13.24    0.51
   3   3   5  118.31    3.36
  -3  -3  -5  115.60    3.63
  -3  -3  -5  126.91    3.62
  -3  -3  -5  123.70    3.26
   3   3   5  126.95    3.42
   3   3   5  124.09    3.48
   3   3   5  116.81    3.34
  -3  -2   3   64.57    2.61
  -3  -2   3   68.45    2.06
  -3  -2   3   70.34    1.99
  -3  -2   3   71.05    2.05
  -3  -2   3   69.48    2.71
   3   2  -3   63.99    2.05
   3   2  -3   66.74    3.41
   3   2  -3   72.37    2.13
   3   2  -3   68.58    2.01
   3  -2   0   16.93    0.95
  -3   2   0   17.52    0.65
   3  -2   0   18.68    1.44
   3  -2   0   19.61    1.25
  -3   2   0   18.67    0.86
  -3   2   0   17.17    0.77
   3  -2   0   16.77    0.77
  -3   2   0   17.73    0.79
   1  -1  -8   40.19    1.73
  -1   1   8   44.80    1.34
   1  -1  -8   41.57    1.39
   1  -1  -8   34.54    2.81
   1  -1  -8   36.43    1.11
  -1   1   8   42.93    1.34
   1  -1  -8   40.61    1.39
  -1   1   8   42.45    1.30
   0  -5  -6   10.52    0.90
   0  -5  -6   10.33    1.34
   0   5   6   10.05    0.60
   0   5   6   10.86    0.99
   0  -5  -6    9.15    0.52
   0   5   6   11.06    0.97
   0   5   6   10.66    0.85
   0  -5  -6   10.63    1.48
   0  -5  -6    9.35    1.24
   3  -1  -3    5.07    1.38
  -3   1   3    4.95    0.50
   3  -1  -3    6.43    1.60
   3  -1  -3    5.52    0.68
  -3   1   3    5.46    0.27
  -3   1   3    4.46    0.52
  -3   1   3    4.70    0.41
   3  -1  -3    5.14    0.43
  -3   1   3    4.74    0.71
  -1   2  -7   49.12    2.10
  -1   2  -7   44.47    1.37
   1  -2   7   44.57    1.51
   1  -2   7   47.00    1.31
  -1   2  -7   49.28    1.72
   1  -2   7   38.44    2.65
   1  -2   7   48.41    1.68
   1   6   2   12.44    1.39
  -1  -6  -2   15.85    1.26
   1   6   2   10.36    1.39
   1   6   2   13.06    1.05
  -1  -6  -2   12.68    0.90
   1   6   2   13.20    0.60
  -1  -6  -2   11.55    1.33
   1   6   2   12.54    0.70
  -1  -6  -2   12.46    1.05
  -3  -3   2  180.49    4.67
   3   3  -2  185.98    5.36
  -3  -3   2  180.26    5.26
  -3  -3   2  176.10    4.52
   3   3  -2  179.81    4.63
   3   3  -2  176.12    4.63
  -3  -3   2  177.21    4.63
   3   3  -2  178.30    4.75
  -3  -3   2  180.53    4.66
   3   3  -2  171.19    4.53
   3   3  -2  184.40    5.72
  -3  -3   2  174.85    5.23
   0  -4   5  190.58    5.30
   0   4  -5  196.48    6.06
   0   4  -5  202.67    4.89
   0   4  -5  202.60    5.50
   0   4  -5  197.22    4.87
   0   4  -5  192.31    6.01
   0  -4   5  185.01    5.33
   0  -4   5  197.14    5.19
  -2   2   6   14.04    0.80
   2  -2  -6   13.43    0.81
   2  -2  -6   12.60    0.99
   2  -2  -6   14.56    2.11
  -2   2   6   14.72    0.80
  -2   2   6   16.03    0.77
   2  -2  -6   12.63    2.04
  -2   2   6   14.53    0.65
  -2   2   6   14.49    1.40
   2  -2  -6   12.84    0.90
  -2   3   5  103.34    2.81
  -2   3   5   99.96    3.31
  -2   3   5  102.41    3.01
   2  -3  -5  102.32    2.89
   2  -3  -5   96.80    3.18
   2  -3  -5   99.21    4.12
   2  -3  -5   94.30    3.99
   2  -3  -5  101.52    2.84
  -2   3   5  103.65    3.13
   2  -3  -5  102.70    2.79
  -2   3   5  101.35    3.00
  -2   3   5  104.55    2.74
  -2   3  -4    3.31    0.45
  -2   3  -4    2.98    0.28
  -2   3  -4    3.47    0.49
   2  -3   4    3.68    0.45
   2  -3   4    2.78    0.96
   2  -3   4    3.01    0.71
   2  -3   4    3.13    0.62
  -2   3  -4    3.33    0.42
  -1  -2   7  200.95    5.01
   1   2  -7  194.41    5.28
  -1  -2   7  199.71    5.40
   1   2  -7  190.83    4.94
   1   2  -7  191.20    6.47
   1   2  -7  201.12    5.02
  -1  -2   7  201.13    4.93
   1   2  -7  182.68    6.67
   0   5  -3   24.94    0.70
   0  -5   3   24.84    1.14
   0   5  -3   25.55    1.47
   0   5  -3   25.09    1.06
   0   5  -3   28.21    1.54
   0   5  -3   27.41    1.79
   0  -5   3   24.19    1.34
  -3   2  -1   17.62    0.79
   3  -2   1   18.19    1.34
  -3   2  -1   18.38    0.79
  -3   2  -1   18.48    0.88
   3  -2   1   17.56    0.76
  -3   2  -1   18.53    0.90
   3  -2   1   19.41    1.01
   3  -2   1   18.91    1.14
   3  -2  -1   58.17    2.52
  -3   2   1   60.26    1.73
  -3   2   1   64.72    1.62
  -3   2   1   61.96    1.78
  -3   2   1   61.00    1.87
   3  -2  -1   60.55    1.56
   3  -2  -1   58.71    2.34
  -1   5   4  133.07    3.55
   1  -5  -4  126.15    4.37
   1  -5  -4  126.57    4.26
  -1   5   4  134.01    3.79
   1  -5  -4  115.56    4.38
  -1   5   4  133.46    3.69
   1  -5  -4  129.47    3.59
  -1   5   4  129.59    3.85
  -1   5   4  133.91    3.38
  -1  -6  -3   21.23    1.34
   1   6   3   17.35    1.52
   1   6   3   18.43    0.89
  -1  -6  -3   17.08    1.43
   1   6   3   18.48    1.52
  -1  -6  -3   20.86    1.15
  -1  -6  -3   18.94    1.23
  -1  -6  -3   18.49    1.45
  -2   4  -1  228.90    5.65
   2  -4   1  215.78    5.61
   2  -4   1  217.20    6.02
  -2   4  -1  218.59    5.69
  -2   4  -1  215.65    5.41
  -2   4  -1  216.39    5.67
  -2   4  -1  213.12    5.42
   3   4   0   79.96    2.46
  -3  -4   0   89.98    2.41
  -3  -4   0   82.53    2.50
   3   4   0   74.14    3.04
  -3  -4   0   80.58    2.80
  -3  -4   0   85.39    2.60
  -3  -4   0   86.63    2.65
   3   4   0   85.07    2.35
   1   5  -3   10.05    0.45
   1   5  -3    8.97    0.37
  -1  -5   3   11.07    0.79
   1   5  -3    8.76    0.42
  -1  -5   3    8.56    0.84
   1   5  -3   10.28    1.25
   1   5  -3    9.02    2.02
  -1  -5   3    8.83    2.09
   1   5  -3    8.97    1.43
   1   5  -3    9.44    0.75
   1   6   1   12.12    1.00
   1   6   1   10.97    1.39
   1   6   1   13.64    0.94
   1   6   1    9.99    1.59
   1   6   1   10.57    0.61
  -1  -6  -1    9.68    1.16
  -1  -6  -1    9.89    1.05
   1   6   1   10.74    0.63
  -1  -6  -1   10.99    0.97
   1   6   1   10.70    0.52
   1   0  -8   66.45    2.78
   1   0  -8   68.22    3.53
   1   0  -8   64.71    3.95
   1   0  -8   71.30    2.05
  -1   0   8   72.54    2.04
   1   0  -8   67.57    1.94
  -1   0   8   72.39    2.03
   3   0   5  205.40    5.10
   3   0   5  195.50    5.58
   3   0   5  206.27    5.37
   3   0   5  204.41    5.28
   3   0   5  194.71    5.19
   3   0   5  210.83    5.34
   3   0   5  204.11    5.16
   3   0   5  205.09    5.35
   2   4   7   98.96    2.89
   2   4   7   97.21    2.99
   2   4   7  102.78    3.29
   2   4   7  102.89    3.05
  -2  -4  -7  102.25    3.34
  -2  -4  -7   94.04    3.97
   2   3  -5   12.59    1.89
  -2  -3   5   12.39    0.60
  -2  -3   5   12.84    1.97
   2   3  -5   11.25    0.55
  -2  -3   5    9.15    2.03
   2   3  -5   10.35    1.64
  -2  -3   5   11.75    0.60
   2   3  -5   11.98    0.55
  -2  -3   5   12.37    0.76
   2   3  -5   11.70    0.57
  -2  -3   5   13.23    0.80
   2   3  -5   10.88    0.86
  -3  -4  -4   14.43    0.77
   3   4   4   15.94    0.93
  -3  -4  -4   15.00    1.21
  -3  -4  -4   16.75    1.06
   3   4   4   15.96    0.89
   3   4   4   14.68    1.16
   3   4   4   16.26    0.93
  -1   3  -6    0.35    0.17
  -1   3  -6    0.36    0.40
   1  -3   6    0.76    0.84
  -1   3  -6   -0.21    0.60
   1  -3   6    0.45    0.43
  -1   3  -6    1.34    0.83
   1  -3   6    0.61    0.55
   3  -1   4    5.30    0.43
   3  -1   4    4.58    0.93
   3  -1   4    5.02    0.88
   3  -1   4    4.18    0.59
   3  -1   4    4.85    0.61
  -3   1  -4    4.43    0.51
  -3   1  -4    4.62    0.45
   3  -1   4    4.61    0.60
  -2   4   3    3.17    0.52
  -2   4   3    2.63    0.29
   2  -4  -3    2.29    0.50
  -2   4   3    2.54    0.59
  -2   4   3    2.41    0.41
   2  -4  -3    2.59    1.16
  -2   4   3    2.90    0.54
   2  -4  -3    0.64    1.16
   2   2   8  115.40    4.16
   2   2   8  117.89    3.19
  -2  -2  -8  121.39    3.67
  -2  -2  -8  114.20    4.39
   2   2   8  112.71    3.19
   2   2   8  109.45    3.16
   2   2   8  117.57    3.08
   1   4  -5    6.93    0.48
  -1  -4   5    7.14    0.44
   1   4  -5    3.82    2.09
   1   4  -5    6.44    1.18
  -1  -4   5    5.62    0.67
   1   4  -5    6.02    0.32
  -1  -4   5    5.67    0.55
  -1  -4   5    7.37    0.63
   1   4  -5    4.17    1.99
   1   4  -5    5.55    1.00
   1   4  -5    6.83    0.41
   1  -2  -8   21.71    0.89
   1  -2  -8   19.47    1.03
  -1   2   8   19.08    0.86
  -1   2   8   19.04    0.82
   1  -2  -8   20.08    1.00
  -1   2   8   20.28    0.91
   1  -2  -8   20.31    2.39
  -1   1  -8  156.76    5.01
   1  -1   8  155.68    4.01
  -1   1  -8  165.09    4.20
  -1   1  -8  145.44    4.75
   1  -1   8  160.76    4.22
   0  -6  -2  223.80    5.65
   0   6   2  227.48    6.06
   0  -6  -2  220.56    5.91
   0   6   2  222.61    5.65
   0  -6  -2  222.57    6.71
   0   6   2  214.07    6.33
   0   6   2  224.93    5.53
   0  -6  -2  209.20    7.12
   0   6   2  217.99    6.09
   0  -6  -2  210.45    6.10
   3  -2   2   24.17    1.20
   3  -2   2   24.19    0.89
  -3   2  -2   23.65    1.01
  -3   2  -2   22.52    0.90
   3  -2   2   22.79    1.12
   3   0  -4   25.86    1.96
  -3   0   4   29.17    0.91
   3   0  -4   26.44    1.30
  -3   0   4   26.91    1.00
  -3   0   4   29.47    1.51
  -3   0   4   29.08    1.76
   3   0  -4   24.62    1.05
  -3   0   4   27.14    1.06
   3   0  -4   25.68    2.32
  -3   0   4   27.03    1.11
  -2  -2   6   54.30    1.59
   2   2  -6   55.05    1.50
   2   2  -6   53.89    3.44
   2   2  -6   51.15    1.56
  -2  -2   6   53.72    1.61
   2   2  -6   50.89    2.56
  -2  -2   6   54.20    3.08
  -2  -2   6   50.66    1.69
   2   2  -6   53.72    1.58
   2   2  -6   49.50    1.70
  -1  -6  -4   71.12    2.52
  -1  -6  -4   71.13    2.46
  -1  -6  -4   64.10    2.47
   1   6   4   68.65    2.80
   1   6   4   69.06    2.49
  -1  -6  -4   69.13    2.89
  -1  -6  -4   70.36    2.66
   1   6   4   68.25    2.11
   1   6   4   68.81    2.48
  -3   2   2   83.89    2.52
  -3   2   2   84.11    2.43
   3  -2  -2   82.37    2.27
  -3   2   2   86.99    2.57
   3  -2  -2   80.11    3.15
   3  -2  -2   83.17    2.59
   3  -2  -2   78.99    3.28
  -3   2   2   87.65    2.30
   0   6   1   44.36    1.38
   0  -6  -1   44.49    1.78
   0   6   1   38.83    1.83
   0  -6  -1   41.51    1.57
   0   6   1   44.81    1.24
   0   6   1   40.67    2.05
   0   6   1   46.91    1.83
   0  -6  -1   44.67    2.88
   2   1   8   11.05    0.65
   2   1   8   10.41    0.61
   2   1   8   10.67    0.65
   2   1   8   11.30    0.96
  -2  -1  -8   10.99    1.07
  -2  -1  -8   12.39    1.71
   2   1   8    7.83    1.63
   2   1   8   11.81    0.62
   2   1   8   10.08    1.79
   3   2   6    0.35    0.45
   3   2   6    0.33    0.39
   3   2   6    0.12    0.32
   3   2   6    0.37    0.45
  -3  -2  -6    0.12    0.78
  -1  -4  -8  270.74    6.53
   1   4   8  245.00    6.94
  -1  -4  -8  232.16    7.69
  -1  -4  -8  235.27    8.04
   1   4   8  250.69    6.52
   1   4   8  253.69    6.58
  -1  -4  -8  259.05    6.31
   1   4   8  246.54    6.78
   3   1  -4    3.99    0.46
  -3  -1   4    4.38    0.52
  -3  -1   4    3.94    1.05
   3   1  -4    4.09    0.57
   3   1  -4    3.37    0.77
  -3  -1   4    5.32    0.47
   3   1  -4    2.84    1.99
  -3  -1   4    4.23    1.23
   3   1  -4    3.98    1.32
  -3  -1   4    3.82    0.45
   3   1  -4    4.03    0.49
   1   6   0   92.38    2.95
  -1  -6   0   90.24    3.04
   1   6   0   95.51    2.42
   1   6   0   92.36    2.96
   1   6   0   87.68    3.85
  -1  -6   0   92.03    2.65
   1   6   0   89.07    2.52
  -1  -6   0   92.93    2.96
  -1  -6   0   94.23    3.48
   1   6   0   90.36    2.49
   0  -6  -3   41.85    2.09
   0   6   3   39.75    1.41
   0   6   3   42.91    1.30
   0   6   3   42.71    1.59
   0  -6  -3   41.85    1.89
   0  -6  -3   41.84    1.42
   0  -6  -3   42.36    1.98
   0  -6  -3   38.74    1.63
   0   6   3   41.98    2.00
   0  -6  -3   36.93    2.66
   2  -1   7   47.43    3.27
   2  -1   7   50.04    1.54
   2  -1   7   49.20    1.63
   2  -1   7   46.75    1.67
   2  -1   7   41.55    3.02
   2  -1   7   43.59    2.79
   2  -1   7   43.55    2.50
   2  -1   7   48.76    1.40
   2  -2   6  105.51    3.09
   2  -2   6  104.50    4.05
   2  -2   6  103.71    4.16
  -2   2  -6  102.18    2.85
  -2   2  -6  104.23    2.79
  -2   2  -6  109.99    2.94
   2  -2   6  109.27    2.88
   2  -2   6  105.87    3.32
   2   5  -2  127.86    5.40
  -2  -5   2  134.16    3.76
  -2  -5   2  139.99    5.04
  -2  -5   2  139.25    3.79
   2   5  -2  131.00    3.43
  -2  -5   2  131.00    3.48
   2   5  -2  133.64    3.44
   2   5  -2  137.29    4.22
   2   5  -2  129.85    3.69
   2   5  -2  139.96    5.42
   1  -5   2   79.48    2.44
  -1   5  -2   75.11    2.51
   1  -5   2   77.86    2.68
  -1   5  -2   77.14    2.60
  -1   5  -2   83.21    2.39
   1  -5   2   74.51    2.45
  -1   5  -2   77.56    1.98
  -1   5  -2   73.72    2.20
  -2  -4   4  104.48    3.10
   2   4  -4  105.83    2.85
   2   4  -4  109.74    2.83
  -2  -4   4  103.49    4.18
  -2  -4   4  107.96    2.90
  -2  -4   4  109.40    4.58
  -2  -4   4  111.48    2.99
  -2  -4   4  110.99    3.09
   2   4  -4  101.25    3.33
   2   4  -4  107.84    2.96
   2   4  -4  102.93    3.84
  -2  -4   4  109.79    2.94
   0   1   9   35.90    1.28
   0  -1  -9   45.17    1.15
   0   1   9   36.56    1.27
   0  -1  -9   41.76    1.36
   0  -1  -9   33.89    2.84
   0  -1  -9   35.75    1.31
   0  -1  -9   33.33    3.11
   3   1   6  903.56   21.90
   3   1   6  912.25   21.88
   3   1   6  917.02   21.79
   3   1   6  882.49   21.86
   3   1   6  904.93   21.85
   3   1   6  918.95   21.82
   3   1   6  871.62   21.85
  -2  -5  -6  184.22    5.21
   2   5   6  179.34    5.13
   2   5   6  178.10    4.92
  -2  -5  -6  173.06    5.83
  -2  -5  -6  191.05    4.67
   2   5   6  179.71    5.29
  -2  -5  -6  185.44    5.43
  -2  -5  -6  186.09    4.78
   2   5   6  189.56    5.16
  -2   4  -2  113.33    3.17
  -2   4  -2  116.65    3.30
   2  -4   2  124.99    3.20
  -2   4  -2  109.55    2.89
   2  -4   2  108.67    3.37
   2  -4   2  113.42    3.49
  -2   4  -2  108.65    2.94
  -2   4  -2  112.61    3.16
   3   4  -1   69.28    2.00
  -3  -4   1   68.71    2.07
  -3  -4   1   69.58    2.62
  -3  -4   1   65.45    2.64
   3   4  -1   60.88    2.77
   3   4  -1   67.94    2.09
   3   4  -1   64.89    2.25
  -3  -4   1   78.36    2.34
  -3  -4   1   66.92    2.02
  -3  -4   1   64.98    2.09
   1   2   9   -0.45    1.49
  -1  -2  -9   -0.83    1.04
  -1  -2  -9    0.07    0.29
  -1  -2  -9   -0.69    1.79
   1   2   9    0.28    0.43
  -1  -2  -9   -0.67    1.65
   1   2   9   -0.38    0.55
   1   2   9    0.77    0.42
   2   3   8   35.34    2.03
   2   3   8   31.82    1.28
  -2  -3  -8   35.19    2.56
  -2  -3  -8   31.03    1.75
  -2  -3  -8   37.67    1.19
   2   3   8   34.40    1.39
   1   5   7  804.30   18.15
   1   5   7  782.15   18.54
  -1  -5  -7  778.06   17.96
  -1  -5  -7  734.27   18.81
  -1  -5  -7  724.42   17.67
  -1  -5  -7  733.91   19.53
  -1  -5  -7  690.40   17.81
   1   5   7  764.62   18.05
  -1  -5  -7  745.27   19.02
   1   5   7  750.10   18.43
  -1  -1  -9  104.20    4.32
   1   1   9  106.81    2.87
   1   1   9   97.58    4.24
   1   1   9  105.06    2.89
  -1  -1  -9  105.21    3.54
  -1  -1  -9   98.60    4.33
   0   2   9   54.56    1.72
   0  -2  -9   59.10    1.64
   0  -2  -9   42.64    3.25
   0  -2  -9   51.60    3.38
   0   2   9   51.08    1.65
   0  -6   0  134.79    4.63
   0   6   0  145.11    4.84
   0   6   0  158.03    3.89
   0   6   0  159.96    4.51
   0   6   0  164.03    4.04
   0  -6   0  161.93    4.53
   0   6   0  157.21    4.75
   1   1  -8   23.46    2.14
   1   1  -8   25.28    2.30
  -1  -1   8   25.04    0.89
   1   1  -8   24.01    2.74
   1   1  -8   23.81    0.92
  -1  -1   8   25.39    1.06
  -1  -1   8   25.48    0.93
   0   4   8  317.53    7.70
   0  -4  -8  309.61    7.50
   0   4   8  276.30    7.54
   0  -4  -8  311.66    7.73
   0  -4  -8  280.06    8.95
   0   4   8  306.75    7.91
  -2   0   7    7.45    0.51
   2   0  -7    5.56    0.65
   2   0  -7    7.37    0.46
  -2   0   7    8.10    0.56
   2   0  -7    6.79    0.50
   2   0  -7    6.35    0.95
  -2   0   7    7.58    0.59
  -2   0   7    7.10    0.52
  -2   0   7    6.92    0.64
   2   0  -7    4.74    2.26
   2   0  -7    8.76    1.89
  -3  -3  -6   35.41    1.19
   3   3   6   33.02    1.33
   3   3   6   37.38    1.46
  -3  -3  -6   34.64    1.71
   3   3   6   32.35    1.28
  -3  -3  -6   38.40    1.89
   3   3   6   36.46    1.39
  -1   5   5   10.17    0.91
  -1   5   5   10.49    0.54
   1  -5  -5    9.76    1.29
   1  -5  -5    9.44    0.64
  -1   5   5    9.72    0.65
  -1   5   5    9.61    0.79
   1  -5  -5    9.45    1.63
  -1   5   5    9.33    0.89
   1  -5  -5   10.43    1.43
   3   4   5   28.52    1.27
  -3  -4  -5   29.81    1.09
   3   4   5   34.22    1.41
  -3  -4  -5   31.02    1.73
   3   4   5   27.77    1.27
  -3  -4  -5   30.35    1.49
   3   4   5   28.16    1.46
   3  -1  -4  165.83    5.82
   3  -1  -4  156.80    4.54
  -3   1   4  155.50    4.42
  -3   1   4  169.27    4.28
  -3   1   4  168.60    4.38
  -3   1   4  167.43    4.12
   3  -1  -4  161.04    5.46
  -3   1   4  161.70    4.66
  -2   1   7   86.40    2.47
   2  -1  -7   82.72    2.62
   2  -1  -7   90.92    2.74
   2  -1  -7   79.83    2.43
  -2   1   7   87.11    2.44
   2  -1  -7   76.45    4.24
  -2   1   7   87.35    2.49
   2  -1  -7   81.48    4.01
   0   6   4   44.80    2.09
   0   6   4   47.97    1.44
   0  -6  -4   46.48    2.16
   0   6   4   43.80    1.93
   0  -6  -4   44.33    2.72
   0   6   4   46.46    1.58
   0  -6  -4   44.03    1.92
   0   6   4   48.22    1.59
   0  -6  -4   46.92    2.00
   0  -6  -4   46.43    2.19
  -2   4   4   32.25    1.22
  -2   4   4   34.27    1.06
  -2   4   4   39.21    1.37
  -2   4   4   33.93    1.29
   2  -4  -4   32.00    1.29
  -2   4   4   33.88    1.40
   2  -4  -4   32.50    2.12
   2  -4  -4   31.55    2.16
  -2   4   4   32.51    1.16
  -3  -3   3    1.69    1.27
   3   3  -3    3.26    0.50
   3   3  -3    3.79    0.48
   3   3  -3    3.90    1.70
  -3  -3   3    3.17    1.30
   3   3  -3    4.24    1.09
  -3  -3   3    4.48    0.49
  -3  -3   3    3.82    0.49
   3   3  -3    3.93    0.60
  -3  -3   3    4.17    0.55
  -3  -3   3    3.03    0.47
  -3   2  -3   68.58    2.01
  -3   2  -3   73.15    2.14
   3  -2   3   68.48    2.26
  -3   2  -3   69.74    2.13
   3  -2   3   71.08    2.29
   1   6   5   12.60    0.91
  -1  -6  -5   12.06    1.64
  -1  -6  -5   12.65    1.23
  -1  -6  -5   11.21    1.14
   1   6   5   11.95    0.76
  -1  -6  -5   11.56    1.00
  -1  -6  -5   13.52    1.48
   1   6   5   12.15    1.08
  -1  -6  -5   11.53    1.31
   1   6   5   11.64    1.40
   0   0  -9   65.88    3.97
   0   0  -9   71.96    2.48
   0   0  -9   74.70    3.98
   0   0   9   73.71    2.10
   0   0  -9   65.79    3.63
   0   0   9   71.09    2.06
   0   0  -9   81.32    2.13
  -3   2   3   94.29    2.84
   3  -2  -3   91.78    2.84
   3  -2  -3   89.34    2.53
  -3   2   3   97.02    2.37
   3  -2  -3   92.41    3.63
  -3   2   3   92.77    2.79
   3  -2  -3   80.05    3.70
  -3   2   3   96.14    2.56
  -3  -2   4   61.59    1.76
  -3  -2   4   58.68    1.77
  -3  -2   4   60.32    2.70
   3   2  -4   53.25    1.80
   3   2  -4   56.39    2.38
   3   2  -4   53.92    3.46
   3   2  -4   54.70    1.70
   3   2  -4   55.59    1.81
  -3  -2   4   56.99    1.79
  -3  -2   4   58.31    2.64
   1  -4  -7    5.11    0.91
  -1   4   7    6.13    0.50
  -1   4   7    6.20    0.58
   1  -4  -7    6.52    1.99
  -1   4   7    7.07    0.57
  -1   4   7    6.08    0.77
   1  -4  -7    7.76    0.78
  -1   4   7    6.24    0.90
   1  -4  -7    5.70    0.47
   1  -4  -7    4.25    1.71
   2   6   2    4.34    1.06
   2   6   2    4.60    0.63
   2   6   2    5.31    0.57
   2   6   2    4.93    0.76
   2   6   2    3.90    1.99
  -2  -6  -2    5.20    1.27
  -2  -6  -2    4.03    0.92
  -2  -6  -2    6.10    0.93
   0  -3   7    0.13    0.47
   0   3  -7    0.41    0.49
   0   3  -7    0.23    1.10
   0   3  -7   -0.36    1.31
   0  -3   7    0.11    0.60
   0   3  -7    0.06    1.12
   0  -3   7    0.10    0.26
   0   3  -7   -0.14    0.33
   2   0   8  154.90    5.60
   2   0   8  154.86    3.94
   2   0   8  157.61    4.42
   2   0   8  147.61    3.93
   2   0   8  136.55    5.32
  -1  -6   1  159.35    4.39
  -1  -6   1  190.71    4.88
   1   6  -1  168.57    4.28
   1   6  -1  155.38    5.23
  -1  -6   1  162.51    4.83
   1   6  -1  169.30    4.18
   1   6  -1  161.66    4.71
  -1  -6   1  152.28    5.44
   1   6  -1  167.73    4.23
   1   6  -1  163.08    4.92
   1   6  -1  169.78    5.97
   2   6   3   24.82    1.66
  -2  -6  -3   24.53    1.48
   2   6   3   21.47    1.29
  -2  -6  -3   24.21    1.39
   2   6   3   20.41    2.26
   2   6   3   25.14    1.07
  -2  -6  -3   24.04    1.55
  -2  -6  -3   25.36    1.17
  -2  -6  -3   25.03    1.28
   2   6   3   24.11    1.15
  -2  -6  -3   25.76    1.29
   1  -4   5   50.97    1.94
  -1   4  -5   50.71    1.50
   1  -4   5   55.71    1.75
   1  -4   5   49.00    2.18
  -1   4  -5   52.69    1.83
  -1   4  -5   55.52    2.03
   0   5   7    1.03    0.68
   0  -5  -7   -0.66    1.43
   0   5   7    0.55    0.73
   0  -5  -7    0.66    0.26
   0  -5  -7    0.79    0.60
   0   5   7    0.89    0.41
   0   5   7    0.81    0.46
   0  -5  -7    0.97    0.95
  -1  -3  -9  394.40    8.97
   1   3   9  344.68    9.21
  -1  -3  -9  322.55   10.69
   1   3   9  359.30    9.81
  -1  -3  -9  377.91    9.41
   1   3   9  350.87    9.07
   1   3   9  344.02    9.01
  -1  -3  -9  366.43   10.71
  -2   3   6    0.38    0.33
   2  -3  -6    0.82    0.74
   2  -3  -6    0.47    0.45
   2  -3  -6    1.30    1.67
   2  -3  -6    0.67    0.43
  -2   3   6    0.94    0.43
   2  -3  -6   -0.80    1.94
  -2   3   6    0.52    0.33
  -2   3   6    0.09    0.75
  -2   3   6    0.10    0.77
  -2   3   6    0.08    0.51
   2  -3   5   34.89    1.55
  -2   3  -5   39.09    1.38
  -2   3  -5   36.91    1.33
  -2   3  -5   38.78    1.24
   2  -3   5   38.03    1.29
  -1   3   8  766.52   17.99
   1  -3  -8  692.36   19.77
   1  -3  -8  691.31   19.66
   1  -3  -8  715.48   17.84
   1  -3  -8  758.21   18.14
   1  -3  -8  742.25   17.75
  -1   3   8  703.57   17.86
   1  -3  -8  730.65   18.02
  -1   3   8  771.15   18.09
   0  -2   8  536.29   13.08
   0  -2   8  506.16   13.65
   0   2  -8  539.98   13.01
   0   2  -8  561.03   15.07
   0   2  -8  545.59   13.14
   0   2  -8  559.24   14.13
   0  -2   8  532.89   13.30
  -2  -6  -1   82.15    3.28
   2   6   1   81.43    2.81
  -2  -6  -1   77.51    2.69
   2   6   1   79.54    2.23
   2   6   1   80.40    3.02
   2   6   1   75.47    2.28
   2   6   1   75.40    2.35
   2   6   1   77.31    2.59
   2   6   1   75.94    4.01
  -2  -6  -1   78.56    2.68
  -2  -1   7   67.79    1.96
   2   1  -7   63.90    3.33
   2   1  -7   70.23    1.98
   2   1  -7   68.14    1.99
  -2  -1   7   66.79    2.04
  -2  -1   7   69.79    1.99
   2   1  -7   61.77    2.70
   2   1  -7   63.60    1.98
  -2  -1   7   69.90    2.16
   2   1  -7   64.19    3.99
   2   1  -7   64.91    1.85
   3  -1   5   87.42    2.48
  -3   1  -5   81.51    2.37
   3  -1   5   85.24    2.54
  -3   1  -5   78.15    2.34
   0   5  -4   16.13    1.27
   0   5  -4   18.00    0.82
   0   5  -4   17.49    1.43
   0  -5   4   17.46    0.95
   0   5  -4   17.87    0.55
   0  -5   4   17.21    1.17
  -1   0  -9   41.19    2.13
  -1   0  -9   46.34    1.33
  -1   0  -9   46.03    2.60
   1   0   9   43.13    1.38
   3   0   6   21.00    0.98
   3   0   6   17.43    0.80
   3   0   6   20.58    0.91
   3   0   6   20.16    1.10
   3   0   6   19.39    0.94
   0  -6   1  440.22   11.33
   0   6  -1  460.89   11.49
   0   6  -1  445.32   11.02
   0   6  -1  419.01   11.89
   0   6  -1  473.42   12.03
   0  -6   1  498.50   11.64
   0  -6   1  404.46   11.65
   0   6  -1  473.16   11.00
   0   6  -1  450.26   10.89
  -1  -5   4  155.41    3.77
   1   5  -4  151.48    5.27
   1   5  -4  158.54    3.70
  -1  -5   4  142.41    4.05
  -1  -5   4  150.03    4.21
   1   5  -4  134.03    3.59
   1   5  -4  150.51    3.96
   1   5  -4  148.72    4.65
   0  -3  -9  139.87    3.53
   0  -3  -9  119.57    5.30
   0   3   9  122.50    3.44
   0   3   9  129.15    3.54
   0   3   9  124.63    3.61
   3   5   2  101.39    3.01
  -3  -5  -2   98.37    3.10
  -3  -5  -2  103.88    3.24
   3   5   2   96.89    3.11
   3   5   2   92.30    3.69
  -2  -6  -4  114.18    3.32
   2   6   4  115.48    3.32
  -2  -6  -4  113.89    3.29
  -2  -6  -4  116.97    3.56
  -2  -6  -4  108.85    3.90
   2   6   4  112.55    3.24
  -2  -6  -4  118.11    3.32
   2   6   4  111.83    4.34
   2   6   4  117.59    3.87
  -2  -6  -4  106.98    3.73
   2   6   4  107.79    3.48
  -2   4  -3    0.56    0.55
   2  -4   3    1.35    0.59
  -2   4  -3    0.99    0.45
   2  -4   3    0.66    0.74
   2  -4   3    1.19    0.87
  -2   4  -3    1.08    0.25
   3   4  -2    1.34    0.48
   3   4  -2    0.73    0.64
  -3  -4   2    0.73    0.44
  -3  -4   2    1.05    0.41
  -3  -4   2    0.53    1.33
  -3  -4   2    0.61    0.51
  -3  -4   2    0.29    0.68
   3   4  -2    0.88    0.44
   3   4  -2    0.39    1.15
  -3  -4   2    1.64    1.41
  -3  -5  -3   60.45    2.27
   3   5   3   54.97    2.09
   3   5   3   50.11    2.58
  -3  -5  -3   59.12    2.32
  -3  -5  -3   62.36    1.97
  -1   5  -3   65.89    2.32
  -1   5  -3   69.73    2.06
   1  -5   3   65.58    2.16
  -1   5  -3   70.26    2.38
   1  -5   3   59.84    2.35
   2  -2  -7   73.79    2.48
   2  -2  -7   74.46    2.33
  -2   2   7   74.52    2.28
   2  -2  -7   71.54    2.38
  -2   2   7   75.15    2.24
   2  -2  -7   68.92    3.78
  -2   2   7   76.19    2.16
   2  -2  -7   69.94    3.84
   0  -6  -5  588.14   15.13
   0   6   5  607.17   14.44
   0   6   5  593.28   15.01
   0   6   5  607.82   14.59
   0  -6  -5  567.98   14.77
   0   6   5  583.47   14.43
   0  -6  -5  552.36   15.44
   0  -6  -5  569.63   15.32
   0   6   5  600.11   15.07
   3   5   1  174.38    4.94
  -3  -5  -1  177.81    4.87
  -3  -5  -1  173.90    4.69
   3   5   1  164.64    4.68
   3   5   1  165.04    5.57
  -2  -4  -8  223.72    6.10
   2   4   8  202.40    5.52
   2   4   8  205.95    5.93
   2   4   8  198.93    5.36
  -2  -4  -8  190.08    6.67
   0   4  -6    1.62    0.70
   0   4  -6    2.33    1.22
   0   4  -6    1.60    0.30
   0   4  -6    1.62    1.26
   0  -4   6    1.85    0.56
   0  -4   6    2.41    0.68
   2   5  -3    2.06    0.57
   2   5  -3    1.47    0.41
  -2  -5   3    1.68    0.42
   2   5  -3    0.91    1.01
   2   5  -3    1.90    0.32
   2   5  -3    1.75    2.09
  -2  -5   3    1.55    0.70
   2   5  -3    1.21    2.14
  -2  -5   3    2.13    2.02
  -2  -5   3    0.63    0.63
   3   0  -5  117.18    3.14
  -3   0   5  108.75    3.76
  -3   0   5  117.91    3.23
   3   0  -5  113.67    3.55
  -3   0   5  117.34    3.03
   3   0  -5  112.08    3.19
   3   0  -5  103.29    4.84
  -3   0   5  112.81    3.13
  -3   0   5  113.20    3.19
   3   0  -5  108.92    4.28
   1   3  -7   29.78    2.71
   1   3  -7   30.79    1.50
   1   3  -7   29.94    2.27
  -1  -3   7   32.42    1.08
   1   3  -7   33.08    1.09
  -1  -3   7   33.29    1.39
   2   6   0   24.82    2.75
   2   6   0   24.84    1.14
   2   6   0   24.26    1.73
   2   6   0   27.39    0.98
  -2  -6   0   22.60    2.17
  -2  -6   0   28.19    1.44
   2   6   0   27.70    1.06
  -2  -6   0   28.08    1.45
   2   6   0   25.41    1.31
  -2  -5  -7  114.10    2.99
  -2  -5  -7  107.94    4.42
   2   5   7  110.06    3.40
   2   5   7  105.66    3.19
   2   5   7  108.83    3.58
  -2  -5  -7  103.21    3.75
  -2  -5  -7  112.01    3.64
   2   5   7  114.77    3.51
   3   2   7    0.67    0.49
  -3  -2  -7    0.99    1.04
   3   2   7    0.77    0.42
   3   2   7    0.61    0.45
  -3  -4  -6   84.89    2.39
  -3  -4  -6   86.61    3.25
   3   4   6   84.83    2.64
  -3  -4  -6   86.90    3.01
   3   4   6   88.23    2.61
   3   4   6   84.30    2.66
  -3   3   0  136.13    3.46
  -3   3   0  135.46    3.82
   3  -3   0  132.26    4.22
   3  -3   0  141.21    4.52
  -3   3   0  144.64    3.79
   3  -3   0  132.79    3.90
  -3   3   0  134.06    3.70
  -3   3   0  136.47    3.64
  -3  -1   5  275.28    6.62
  -3  -1   5  267.04    6.70
  -3  -1   5  275.68    7.57
  -3  -1   5  265.62    6.67
   3   1  -5  270.71    8.72
   3   1  -5  249.31    7.61
   3   1  -5  260.38    6.78
   3   1  -5  254.48    7.23
  -3  -1   5  261.55    6.71
   3   1  -5  251.76    6.64
   3   1  -5  259.99    6.69
  -3  -5  -4    8.51    1.21
  -3  -5  -4    7.06    0.91
   3   5   4    9.61    0.88
   3   5   4   10.54    0.93
  -3  -5  -4   10.03    1.21
   3   5   4    9.89    1.45
  -3  -5  -4   11.19    0.74
   2  -4  -5   53.00    3.09
   2  -4  -5   58.52    2.05
   2  -4  -5   56.19    2.96
  -2   4   5   61.03    1.93
   2  -4  -5   55.29    1.89
  -2   4   5   61.67    1.89
  -2   4   5   59.13    1.89
  -2   4   5   60.11    2.07
  -2   4   5   60.90    1.99
  -2   4   5   61.00    1.72
   2  -4  -5   56.85    1.80
  -3   3   1  293.43    7.38
  -3   3   1  302.94    7.21
   3  -3  -1  269.56    8.01
  -3   3   1  284.30    7.45
  -3   3   1  289.35    7.47
   3  -3  -1  269.94    8.30
  -1   5   6  363.53    9.06
   1  -5  -6  324.60   10.13
   1  -5  -6  333.38   10.37
  -1   5   6  373.51    9.37
   1  -5  -6  352.36    8.94
  -1   5   6  356.70    9.06
   1  -5  -6  352.63    9.58
   1  -5  -6  343.13    9.55
  -1   5   6  376.50    9.16
  -1   5   6  361.44    8.87
  -1  -6  -6    6.10    0.74
   1   6   6    6.42    0.64
   1   6   6    5.69    0.96
   1   6   6    5.14    1.16
  -1  -6  -6    5.04    1.08
  -1  -6  -6    5.97    1.58
  -1  -6  -6    6.75    1.29
  -3   2  -4    0.22    0.37
  -3   2  -4    0.37    0.37
   3  -2   4    1.67    0.72
  -3   2  -4    0.49    0.42
   3  -2   4    0.43    0.51
   2   3  -6   78.89    3.80
  -2  -3   6   89.56    2.47
  -2  -3   6   90.97    2.63
   2   3  -6   84.12    2.35
   2   3  -6   90.10    2.80
  -2  -3   6   92.16    2.67
   2   3  -6   81.49    3.94
   2   3  -6   86.91    2.38
  -1   2  -8  104.90    3.51
   1  -2   8   99.52    2.98
   1  -2   8   97.56    2.81
  -1   2  -8   95.23    2.92
  -1   2  -8   97.36    2.55
   3  -2  -4    1.15    1.64
   3  -2  -4    1.25    1.55
  -3   2   4   -0.02    0.50
   3  -2  -4    0.79    0.55
  -3   2   4    0.35    0.31
  -3   2   4   -0.28    0.26
  -3   2   4   -0.03    0.72
   0   1  -9   55.94    3.59
   0   1  -9   51.08    3.14
   0   1  -9   65.56    1.74
   0   1  -9   61.17    2.40
   0  -1   9   60.71    1.79
   0  -1   9   59.23    1.98
   3  -3   1   22.05    1.65
  -3   3  -1   20.29    0.83
  -3   3  -1   21.52    1.02
   3  -3   1   20.75    1.34
  -3   3  -1   21.12    0.95
   3  -3   1   17.56    1.07
  -3   3  -1   17.53    0.95
   3   1   7   22.17    0.96
   3   1   7   21.45    0.90
   3   1   7   21.93    0.95
   3   5   0   21.16    1.95
  -3  -5   0   21.85    1.24
  -3  -5   0   24.39    1.13
   3   5   0   20.31    1.06
   2   6   5   12.84    0.84
   2   6   5   11.71    1.02
  -2  -6  -5   14.19    1.22
  -2  -6  -5   12.99    0.82
  -2  -6  -5   12.34    1.54
  -2  -6  -5   15.06    1.13
   2   6   5   14.28    1.41
  -2  -6  -5   13.39    1.41
   2   6   5   13.94    1.15
   1   6  -2  226.27    6.84
   1   6  -2  247.81    7.69
   1   6  -2  235.44    5.69
   1   6  -2  227.90    5.73
  -1  -6   2  228.88    6.35
   1   6  -2  225.05    6.17
  -1  -6   2  228.40    6.25
   1   6  -2  226.45    6.63
   1   4  -6    2.75    2.18
  -1  -4   6    1.23    0.61
   1   4  -6    1.60    0.93
   1   4  -6    1.96    1.18
  -1  -4   6    2.31    0.36
  -1  -4   6    1.61    0.58
   1   4  -6    3.20    1.99
   1   4  -6    2.41    0.35
   1  -1  -9   26.16    2.78
   1  -1  -9   27.32    1.05
   1  -1  -9   27.34    1.69
  -1   1   9   25.86    1.04
  -1   1   9   28.87    1.05
  -1   3  -7   48.00    1.52
  -1   3  -7   43.30    2.04
   1  -3   7   44.14    1.76
  -1   3  -7   49.36    1.86
   1  -3   7   45.23    1.59
  -3  -3  -7   48.91    2.33
   3   3   7   45.49    1.64
   3   3   7   46.81    1.58
   3   3   7   45.16    1.65
  -3  -3  -7   50.20    2.27
   1   2  -8   40.73    3.73
  -1  -2   8   42.92    1.34
   1   2  -8   39.97    2.98
   1   2  -8   41.02    1.28
   1   2  -8   43.03    1.48
  -1  -2   8   39.20    1.67
   1   2  -8   37.56    2.79
  -3   1   5   31.94    1.66
  -3   1   5   29.70    1.16
  -3   1   5   28.31    1.06
   3  -1  -5   27.63    2.56
  -3   1   5   30.59    0.98
   3  -1  -5   27.95    2.38
   3  -1  -5   29.47    1.38
  -3   1   5   29.08    1.20
   1   5   8   52.65    1.84
  -1  -5  -8   57.37    1.66
  -1  -5  -8   58.13    3.43
   1   5   8   52.80    1.77
  -1  -5  -8   54.65    2.95
   1   5   8   54.18    2.16
  -2  -4   5  101.95    2.96
   2   4  -5   97.55    3.82
   2   4  -5   96.22    2.72
   2   4  -5   95.35    2.62
  -2  -4   5  109.34    2.78
   2   4  -5  101.67    3.28
   2   4  -5   92.42    4.50
   2   4  -5   94.94    2.60
  -2  -4   5   99.02    2.91
  -2  -2  -9   32.91    1.82
  -2  -2  -9   31.86    2.50
   2   2   9   30.01    1.20
   2   2   9   31.25    1.21
  -3   3   2  266.57    7.09
  -3   3   2  271.74    6.99
   3  -3  -2  265.61    7.86
  -3   3   2  283.05    7.08
   3  -3  -2  265.65    8.01
   3  -3  -2  271.44    7.20
  -3   3   2  279.81    6.82
  -3   3   2  278.17    7.17
   0   6  -2   68.95    2.70
   0  -6   2   68.59    2.37
   0  -6   2   62.22    2.49
   0   6  -2   65.46    2.78
   0   6  -2   81.60    2.68
   0   6  -2   68.43    2.24
   0   6  -2   67.94    1.75
  -2   2  -7    0.76    0.35
  -2   2  -7    0.64    0.41
   2  -2   7    0.31    0.47
   2  -2   7   -0.53    0.62
   1   4   9    0.14    0.74
   1   4   9   -0.02    0.48
  -1  -4  -9    1.25    2.01
   1   4   9    0.30    0.46
  -1  -4  -9    0.77    1.87
  -3  -3   4   68.04    2.03
  -3  -3   4   71.56    2.08
   3   3  -4   63.37    2.00
   3   3  -4   65.25    1.99
   3   3  -4   65.17    2.17
  -3  -3   4   70.74    3.15
  -3  -3   4   67.65    3.10
  -3  -3   4   66.53    2.07
  -3  -3   4   68.34    2.06
   3   3  -4   67.87    3.57
  -1   6   2   -0.54    0.70
  -1   6   2    0.09    0.20
  -1   6   2    0.60    0.70
  -1   6   2    0.09    0.43
   1  -6  -2    0.16    0.86
  -1   6   2    0.06    0.37
   1  -6  -2   -0.17    1.07
   1   0  -9   20.73    2.45
   1   0  -9   19.21    2.94
   1   0  -9   24.89    1.00
   1   0  -9   22.59    1.99
  -1   0   9   25.59    1.10
  -1   0   9   23.36    0.95
  -1   0   9   24.87    0.95
  -1   6   1    8.69    0.89
   1  -6  -1    8.76    1.18
  -1   6   1   10.29    1.01
  -1   6   1    9.30    0.54
  -1   6   1    8.08    0.71
   1  -6  -1    7.29    1.00
   2   2  -7   16.70    0.64
  -2  -2   7   17.55    0.75
  -2  -2   7   18.28    0.90
  -2  -2   7   15.59    0.74
   2   2  -7   16.68    2.72
   2   2  -7   15.25    0.74
   2   2  -7   15.87    0.94
   2   2  -7   16.79    1.85
   1  -2  -9  152.01    6.57
  -1   2   9  169.13    4.53
   1  -2  -9  156.05    6.42
   1  -2  -9  171.16    4.60
  -1   2   9  178.29    4.52
   1  -2  -9  166.02    4.73
   2  -1   8  118.69    3.35
   2  -1   8  120.94    3.31
   2  -1   8  121.21    3.47
   2   1   9   16.50    0.81
  -2  -1  -9   18.26    1.40
   2   1   9   16.37    0.81
  -2   5   1   25.27    0.96
  -2   5   1   25.17    1.22
   2  -5  -1   24.74    1.69
  -2   5   1   24.81    1.20
   2  -5  -1   23.10    1.21
  -2   5   1   23.44    0.92
   2  -5  -1   25.78    1.78
  -3  -5  -5    2.47    0.85
  -3  -5  -5    2.93    1.26
  -3  -5  -5    2.83    0.51
   3   5   5    2.05    0.71
   3   5   5    2.13    0.69
   3   5   5    1.72    0.56
  -2  -6   1  221.98    7.12
   2   6  -1  199.04    6.37
   2   6  -1  201.98    7.60
   2   6  -1  208.96    6.67
  -2  -6   1  210.74    5.93
   2   6  -1  210.21    5.84
   2   6  -1  214.23    5.53
  -2  -6   1  249.66    6.12
   2   6  -1  216.85    5.44
  -3   3  -2    6.99    0.64
   3  -3   2    7.74    0.98
  -3   3  -2    8.59    0.68
   3  -3   2    7.34    0.77
  -3   3  -2    8.15    0.54
   1  -1   9  132.84    3.48
  -1   1  -9  131.76    4.33
  -1   1  -9  134.89    4.61
   1  -1   9  133.92    3.70
  -1   1  -9  135.94    3.60
  -1   6   3   51.46    1.69
  -1   6   3   54.49    1.75
   1  -6  -3   54.75    2.57
  -1   6   3   55.39    1.50
   1  -6  -3   48.95    2.58
  -1   6   3   56.69    2.12
   1  -6  -3   53.64    2.34
   2   3   9   80.64    2.52
  -2  -3  -9   74.81    3.07
   2   3   9   76.15    2.37
  -2  -3  -9   82.00    2.24
   2   3   9   77.96    2.41
  -2  -3  -9   76.15    3.88
  -2   5   2   28.06    1.26
  -2   5   2   24.00    0.95
   2  -5  -2   20.59    1.74
   2  -5  -2   22.13    1.17
   2  -5  -2   21.84    1.82
  -2   5   2   25.07    1.00
  -2   5   2   21.21    1.19
  -2   5   2   25.99    0.77
   0  -6  -6   10.83    1.63
   0  -6  -6   11.07    0.94
   0  -6  -6   11.64    1.61
   0   6   6   10.40    0.66
   0   6   6   10.80    1.08
   0   6   6   10.95    1.10
   0   6   6   11.00    0.76
   0  -6  -6   10.93    1.43
   3   2  -5   15.21    0.83
   3   2  -5   14.10    0.82
   3   2  -5   15.26    1.45
  -3  -2   5   16.76    0.83
  -3  -2   5   16.51    1.82
   3   2  -5   14.37    2.66
  -3  -2   5   16.32    0.80
   3   2  -5   13.10    0.70
  -3  -2   5   15.80    0.77
   4   1   1   46.39    1.59
   4   1   1   45.55    1.84
  -4  -1  -1   48.20    1.62
  -2   5   0   25.98    0.97
   2  -5   0   27.96    1.31
  -2   5   0   26.42    1.24
  -2   5   0   31.39    1.35
  -2   5   0   27.07    0.96
   2  -5   0   25.62    1.68
  -2   4  -4    0.31    0.48
   2  -4   4    0.63    0.90
  -2   4  -4   -0.14    0.58
  -2   4  -4   -0.12    0.40
   1  -6   0    0.40    0.96
  -1   6   0    1.02    0.65
  -1   6   0   -0.14    0.55
  -1   6   0    0.28    0.31
   1  -6   0    0.45    0.77
  -1   6   0    0.52    0.75
   4   2   1    1.48    0.70
  -4  -2  -1    0.40    0.48
   4   2   1    0.70    0.49
   3  -1   6    5.32    0.49
   3  -1   6    5.78    0.68
   4   2   2   15.58    0.89
  -4  -2  -2   17.12    0.99
   4   2   2   16.29    0.86
   4   2   2   16.51    1.10
  -3  -4   3    0.52    0.62
  -3  -4   3    0.83    0.52
  -3  -4   3    0.65    0.44
  -3  -4   3    1.54    0.48
   3   4  -3    0.06    1.34
  -3  -4   3    0.62    1.61
   3   4  -3   -0.43    1.34
   3   4  -3    1.62    0.49
  -3  -4   3    1.15    1.50
   3   4  -3    1.63    0.65
  -4  -1  -2    1.54    0.52
  -4  -1  -2    0.67    0.51
   4   1   2    0.83    0.44
   4   1   2    1.39    0.64
   0   4   9   87.08    2.60
   0   4   9   87.38    2.81
   0  -4  -9   75.67    4.17
   0   5   8   18.84    0.88
   0  -5  -8   16.92    0.92
   0   5   8   19.77    1.28
   0   5   8   19.01    0.95
   0  -5  -8   14.16    2.18
   3   5  -1    3.39    1.56
   3   5  -1    3.78    0.65
  -3  -5   1    4.81    0.90
  -3  -5   1    4.09    0.71
   3   5  -1    4.08    0.88
  -3  -5   1    4.70    1.46
  -4  -1   0   19.18    0.92
   4   1   0   17.71    1.17
   1  -4  -8   49.09    1.97
  -1   4   8   54.38    1.78
  -1   4   8   53.85    1.66
   1  -4  -8   50.26    1.60
  -1   4   8   56.13    1.97
   1  -4  -8   47.98    3.27
   1  -4  -8   56.21    3.54
   2  -3  -7   87.23    2.56
   2  -3  -7   87.98    2.96
  -2   3   7   96.19    2.60
  -2   3   7   92.71    2.81
   2  -3  -7   84.99    4.31
   2  -3  -7   90.21    2.69
   2  -3  -7   87.88    4.38
  -2   3   7   94.13    3.07
  -2   3   7   94.87    2.73
  -3   3   3   86.46    2.75
  -3   3   3   88.97    2.58
   3  -3  -3   92.89    3.78
  -3   3   3   86.99    2.60
   3  -3  -3   82.74    3.60
  -3   3   3   86.43    2.71
  -3   3   3   90.59    2.39
   3  -3  -3   84.31    2.70
  -1   5  -4    0.45    0.41
   1  -5   4   -0.07    0.85
  -1   5  -4    0.48    0.66
   1  -5   4    0.28    0.62
   2  -3   6    5.15    0.84
  -2   3  -6    5.15    0.57
  -2   3  -6    5.68    0.55
  -2   3  -6    5.05    0.43
   2  -3   6    6.16    0.63
  -1   4  -6   14.96    0.57
   1  -4   6   16.08    0.91
   1  -4   6   15.93    1.09
  -1   4  -6   16.97    0.95
  -1   4  -6   15.00    1.13
   3   0   7  129.67    3.50
   3   0   7  121.07    3.35
   2   0  -8    0.06    0.30
  -2   0   8   -0.15    0.35
   2   0  -8    0.25    2.26
   2   0  -8    0.32    1.02
   2   0  -8    1.24    2.02
  -2   0   8   -0.12    0.49
  -2   0   8    0.11    0.39
   0   5  -5    3.71    1.29
   0   5  -5    1.54    0.36
   0   5  -5    3.16    1.08
   0  -5   5    1.32    0.60
   0  -5   5    1.45    0.78
   0   5  -5    1.79    0.84
   2  -1  -8    7.75    0.45
  -2   1   8    8.42    0.58
   2  -1  -8    5.20    2.49
  -2   1   8    8.25    0.63
   2  -1  -8    7.99    0.84
   2  -1  -8    5.28    2.15
   2  -1  -8    8.37    0.96
   2   6   6  455.79   11.64
  -2  -6  -6  433.59   11.99
   2   6   6  416.95   10.93
  -2  -6  -6  440.32   11.25
  -2  -6  -6  454.32   11.51
   2   6   6  435.21   11.29
   4   2   0   57.66    2.26
   4   2   0   58.14    1.90
  -4  -2   0   61.74    1.99
  -2   5   3   72.10    2.44
   2  -5  -3   69.39    3.13
   2  -5  -3   68.82    2.30
  -2   5   3   71.60    2.09
  -2   5   3   77.25    2.42
  -2   5   3   71.61    1.92
   2  -5  -3   61.27    3.06
  -2   5   3   73.56    2.16
  -1  -2 -10  285.70    7.87
  -1  -2 -10  278.19    9.27
  -1  -2 -10  281.44    9.06
   1   2  10  289.67    7.27
   1   2  10  288.06    7.32
  -4  -2  -3   57.98    2.00
  -4  -2  -3   62.56    2.13
   4   2   3   57.24    1.93
   4   2   3   60.95    2.16
   4   2   3   60.72    1.97
   0   1  10   78.56    2.28
   0  -1 -10   74.13    4.40
   0  -1 -10   73.84    4.17
   0  -1 -10   72.60    4.03
   0   1  10   79.58    2.29
  -3  -4  -7   14.38    1.39
  -3  -4  -7   13.22    1.78
   3   4   7   13.33    0.88
   3   4   7   14.25    0.96
   3   4   7   14.97    0.96
   1  -6  -4   19.41    1.04
   1  -6  -4   18.89    1.89
  -1   6   4   18.21    1.16
  -1   6   4   19.67    0.92
  -1   6   4   20.28    1.25
  -1   6   4   21.09    0.75
   1  -6  -4   17.48    1.69
  -2   5  -1   12.97    0.80
  -2   5  -1   13.93    0.68
  -2   5  -1   15.12    0.94
  -2   5  -1   13.90    0.62
   2  -5   1   12.27    1.29
   4   1   3   44.53    1.55
  -4  -1  -3   43.29    1.60
  -4  -1  -3   44.20    1.67
   4   1   3   45.33    1.74
   0  -2 -10  192.69    7.36
   0   2  10  193.77    4.99
   0   2  10  191.58    5.02
   1   5  -5   -1.84    1.97
  -1  -5   5   -0.24    0.60
   1   5  -5    0.78    1.62
   1   5  -5    0.33    0.42
   1   5  -5    0.25    1.05
  -1  -5   5    0.19    0.65
   1   5  -5    0.15    0.29
   1   1  10   11.23    0.65
  -1  -1 -10   12.50    2.20
  -1  -1 -10   12.25    2.04
   1   1  10   10.72    0.67
  -1  -1 -10   11.72    1.42
   1   6   7    1.65    1.08
  -1  -6  -7    0.53    1.70
   1   6   7    0.05    0.88
  -1  -6  -7    0.06    1.10
   1   6   7    1.42    0.52
  -1  -6  -7    1.35    1.45
   2  -4  -6    9.63    2.09
  -2   4   6   11.52    0.71
  -2   4   6   13.79    0.66
  -2   4   6   12.75    0.92
  -2   4   6   12.72    0.98
   2  -4  -6   12.34    0.80
   2  -4  -6   12.73    2.09
  -2   4   6   12.93    1.00
  -3   2  -5   18.17    0.80
   3  -2   5   19.23    1.07
  -3   2  -5   19.32    0.90
   2   5  -4   31.33    1.84
   2   5  -4   27.48    1.19
  -2  -5   4   29.08    1.09
   2   5  -4   28.32    3.29
  -2  -5   4   28.57    1.34
  -2  -5   4   30.43    1.34
   4   0   1   80.83    2.67
  -4   0  -1   82.88    2.49
  -4   0  -1   82.82    2.36
  -4   0  -1   81.58    2.54
  -3   2   5   15.13    0.72
  -3   2   5   17.14    1.30
   3  -2  -5   14.95    2.17
   3  -2  -5   19.31    2.52
  -3   2   5   16.20    0.85
  -3   2   5   16.13    0.66
   3  -2  -5   16.00    1.02
  -3   2   5   16.40    0.94
  -1  -1   9   22.19    0.90
   1   1  -9   21.80    0.91
   1   1  -9   19.93    2.22
  -1  -1   9   23.16    1.08
   1   1  -9   19.26    2.77
   1  -6   1   30.58    1.75
  -1   6  -1   32.15    0.98
  -1   6  -1   32.90    1.42
   1  -6   1   29.83    1.50
  -1   6  -1   30.79    1.44
   4   1  -1    1.98    0.71
  -4  -1   1    1.44    0.45
   4   1  -1    2.89    0.54
  -4  -1   1    1.64    0.50
   4   1  -1    1.70    0.47
   4   3   2    1.05    0.83
   4   3   2    2.38    0.58
  -4  -3  -2    1.82    0.75
  -4  -3  -2    0.71    0.54
   4   3   2    2.02    0.53
  -4   0   0   34.62    1.35
   4   0   0   35.98    1.58
  -4   0   0   36.21    1.42
  -4   0   0   34.32    1.25
  -2  -5  -8    8.13    1.40
   2   5   8    9.06    0.75
  -2  -5  -8    8.83    1.50
  -2  -5  -8    7.70    1.92
   2   5   8    8.88    1.04
   2   0   9    7.97    0.54
  -3   3  -3    8.54    0.66
  -3   3  -3    7.78    0.66
   3  -3   3    7.14    0.99
  -3   3  -3    8.67    0.55
   3  -3   3    8.64    0.81
   1   6  -3   20.92    1.72
   1   6  -3   23.12    1.19
   1   6  -3   22.30    1.76
   1   6  -3   22.71    2.47
  -1  -6   3   25.33    1.29
  -1  -6   3   22.87    1.40
  -1   3   9    8.20    0.78
  -1   3   9    8.56    0.66
   1  -3  -9    7.96    2.48
   1  -3  -9    5.98    2.25
   4   3   1   35.77    1.80
   4   3   1   34.84    1.43
  -4  -3  -1   32.61    1.38
  -4  -3  -1   34.37    1.39
   1  -5  -7    0.70    0.40
   1  -5  -7    0.97    0.95
   1  -5  -7   -1.88    1.84
  -1   5   7   -0.10    0.39
   1  -5  -7    0.09    1.63
  -1   5   7    0.97    0.74
  -1   5   7    0.29    0.50
  -1  -7  -2   -0.52    0.89
   1   7   2    0.81    0.88
   1   7   2    1.00    1.22
   1   7   2   -0.04    0.45
  -1  -7  -2    0.25    0.73
   1   7   2    0.59    0.33
  -1  -7  -2   -0.26    1.00
   1   7   2   -0.72    1.24
   4   0   2  115.87    3.45
  -4   0  -2  119.69    3.18
  -4   0  -2  106.89    3.27
  -4   0  -2  115.22    3.26
  -1  -7  -3  158.95    4.89
  -1  -7  -3  165.37    5.18
  -1  -7  -3  159.56    4.58
   1   7   3  149.49    4.72
   1   7   3  160.42    4.93
   1   7   3  155.67    5.18
   1   7   3  156.70    4.23
  -1  -7  -3  155.22    4.74
   0  -3   8    3.31    0.72
   0   3  -8    3.06    0.45
   0  -3   8    3.40    0.60
   0   3  -8    2.87    0.47
   0   3  -8    1.45    1.56
   0   3  -8    2.32    1.33
   0   3  -8    3.75    1.29
   3   0  -6   35.86    2.64
  -3   0   6   41.13    1.44
  -3   0   6   37.42    2.20
   3   0  -6   39.58    1.84
  -3   0   6   40.25    1.32
   3   0  -6   39.89    1.36
   3   0  -6   38.47    1.45
  -3   0   6   41.32    1.45
   3   0  -6   36.40    3.32
  -3  -5  -6   81.34    3.39
  -3  -5  -6   84.76    3.02
   3   5   6   82.19    2.73
   3   5   6   78.87    2.73
   3   5   6   85.52    2.59
   1   3  10    0.40    0.47
   1   3  10    0.52    0.54
  -1  -3 -10    0.61    2.20
  -1  -3 -10    1.06    0.41
  -1  -3 -10    0.45    2.14
   0   6  -3   26.59    1.20
   0  -6   3   24.83    1.52
   0  -6   3   26.62    1.38
   0   6  -3   31.60    1.69
   0   6  -3   29.02    1.74
   0   6  -3   24.93    1.79
   4   3   3    6.47    0.92
   4   3   3    6.81    0.70
   4   3   3    5.51    0.65
  -4  -3  -3    4.93    0.70
  -4  -3  -3    6.07    0.84
   4   2  -1   37.63    1.46
  -4  -2   1   38.75    1.41
   4   2  -1   36.85    1.39
   4   2  -1   36.52    1.80
  -4  -2   1   36.42    1.43
   3   2   8   12.51    0.81
   3   2   8   13.46    0.85
  -2  -1   8   -0.10    0.36
  -2  -1   8    0.58    0.51
   2   1  -8    0.17    0.26
   2   1  -8    1.08    1.31
   2   1  -8    2.00    2.52
   2   1  -8    0.27    1.78
  -2  -1   8   -0.06    0.37
   2   1  -8    0.05    0.43
   2   4   9    7.04    0.89
  -2  -4  -9    3.90    2.04
   2   4   9    6.10    0.69
  -2  -4  -9    6.25    1.50
  -4  -2  -4   13.17    1.04
   4   2   4   12.64    0.82
   4   2   4   13.02    1.00
  -4  -2  -4   13.49    0.92
   4   2   4   13.06    0.84
   2  -2  -8   43.99    1.72
  -2   2   8   45.30    1.49
   2  -2  -8   41.26    3.26
  -2   2   8   47.00    1.59
  -2   2   8   44.17    1.57
   2  -2  -8   36.37    3.35
   2   6  -2   10.99    2.44
   2   6  -2    7.04    1.68
  -2  -6   2    9.65    1.05
   2   6  -2    9.12    0.59
   2   6  -2    8.31    1.39
   2   6  -2    9.10    0.90
  -2  -6   2    8.52    1.07
   1   7   1   62.61    2.98
   1   7   1   61.84    1.70
   1   7   1   61.46    1.83
   1   7   1   60.63    1.85
  -1  -7  -1   57.18    2.12
   1   7   1   53.01    2.75
  -1  -7  -1   58.86    2.34
   1   7   1   56.90    2.36
  -1  -7  -1   57.56    2.50
   0   0  10    9.22    0.59
   0   0 -10    7.96    2.36
   0   0 -10    7.22    0.85
   0   0 -10    6.72    2.09
   0   0 -10    9.53    2.56
  -2   5   4   10.48    0.81
  -2   5   4   12.29    0.89
   2  -5  -4   11.50    1.66
   2  -5  -4   11.51    0.84
  -2   5   4   10.28    0.94
  -2   5   4   11.77    0.74
   2  -5  -4    8.89    1.68
  -2   5   4   11.75    0.55
  -3  -1   6    2.90    0.51
  -3  -1   6    2.96    0.50
  -3  -1   6    2.95    0.45
   3   1  -6    2.32    0.95
   3   1  -6    2.99    0.61
   3   1  -6    2.58    0.49
  -3  -1   6    3.19    0.51
   3   1  -6    2.98    0.45
  -3  -1   6    2.35    1.46
   3   1  -6    3.77    2.58
   4   0  -1    2.59    0.71
  -4   0   1    2.60    0.48
  -4   0   1    2.68    0.57
  -4  -3   0   11.69    0.81
   4   3   0   11.11    1.25
   4   3   0   10.80    0.78
  -4  -3   0   10.88    0.81
   1   7   4  232.56    6.57
  -1  -7  -4  237.32    7.20
   1   7   4  248.22    7.21
  -1  -7  -4  236.01    6.92
   1   7   4  247.72    6.25
  -1  -7  -4  236.26    6.65
  -1  -7  -4  229.70    6.74
  -3   3   4    0.58    0.55
   3  -3  -4    0.68    1.59
  -3   3   4    0.76    0.45
   3  -3  -4    0.20    0.59
  -3   3   4    0.85    0.34
  -3   3   4    0.48    0.44
   3  -3  -4    0.77    1.78
   0   2  -9    0.75    1.86
   0  -2   9   -0.10    0.54
   0   2  -9    0.05    1.03
   0  -2   9    0.14    0.32
   4   1   4   64.08    2.20
  -4  -1  -4   61.86    2.06
  -4  -1  -4   63.27    2.20
   4   1   4   58.98    1.96
   3   3   8   37.37    1.46
  -3  -3  -8   38.14    2.29
   3   3   8   35.88    1.49
  -3  -3  -8   37.73    2.19
   0   3  10    1.48    0.44
   0   3  10    0.76    0.50
   0  -3 -10    1.06    2.40
   3  -1  -6   12.97    1.02
   3  -1  -6    9.18    2.32
  -3   1   6   15.04    0.71
  -3   1   6   16.31    0.88
  -3   1   6   15.23    0.83
  -3   1   6   14.35    0.75
   3  -1  -6   15.28    2.38
   0   4  -7    1.38    1.23
   0   4  -7    0.23    0.59
   0  -4   7    0.92    0.69
   0  -4   7   -0.35    0.65
  -3  -5   2    0.11    0.67
   3   5  -2   -0.05    0.57
   3   5  -2    0.09    1.71
  -3  -5   2   -0.09    0.54
   3   5  -2    0.04    0.78
  -3  -5   2    0.29    0.78
  -2   5  -2   31.97    1.31
  -2   5  -2   30.71    0.98
  -2   5  -2   31.73    1.29
  -2   5  -2   34.07    1.44
   2  -5   2   31.60    1.79
   4   0   3    8.77    0.70
   4   0   3   10.18    0.88
  -4   0  -3    9.77    0.75
   1   0  10   52.44    1.60
  -1   0 -10   52.45    2.93
  -1   0 -10   48.26    2.36
   1  -6  -5   28.04    1.22
  -1   6   5   29.48    1.44
  -1   6   5   30.43    1.21
  -1   6   5   31.19    1.02
  -1   6   5   31.32    1.56
   1  -6  -5   27.39    2.31
   1  -6  -5   25.97    2.14
   3   1   8    1.18    0.48
   0  -6  -7   20.86    2.09
   0  -6  -7   19.45    0.80
   0   6   7   20.93    0.92
   0   6   7   19.98    1.29
   0   6   7   22.03    1.39
   0   6   7   21.08    1.05
   4   3   4   21.65    1.11
   4   3   4   22.65    1.10
  -4  -3  -4   23.38    1.34
   4   3   4   21.31    1.31
   0   7   2    4.20    0.51
   0   7   2    6.59    1.17
   0   7   2    4.07    0.96
   0   7   2    5.24    0.43
   0  -7  -2    5.23    1.08
   0   7   2    5.05    0.87
  -3  -3   5    8.03    0.65
  -3  -3   5    7.53    1.95
   3   3  -5    5.77    2.39
  -3  -3   5    6.73    0.66
   3   3  -5    5.66    1.43
   3   3  -5    6.98    0.60
   3   3  -5    8.29    0.78
  -3  -3   5    6.61    0.64
  -3  -3   5    7.42    0.61
   3   3  -5    6.13    0.59
   3   6   2    9.36    0.95
   3   6   2   11.26    2.20
  -3  -6  -2    8.67    1.10
   3   6   2   10.63    1.16
  -3  -6  -2    9.03    1.09
   3   6   2    8.63    0.75
   3   6   3   13.91    1.06
  -3  -6  -3   14.00    1.34
  -3  -6  -3   14.70    1.40
   3   6   3   14.57    1.35
  -3  -6  -3   16.64    1.17
   3   6   3   14.70    0.92
   3   6   3   12.98    2.19
   4   1  -2   22.36    1.08
  -4  -1   2   24.66    1.11
  -4  -1   2   24.09    1.03
   4   1  -2   24.43    1.41
   1   5   9   39.02    1.52
   1   5   9   41.78    1.89
  -1  -5  -9   34.69    2.79
  -1  -5  -9   35.53    3.17
   0   7   3    8.39    0.85
   0   7   3    7.90    1.25
   0   7   3    9.15    1.06
   0   7   3    8.59    0.53
   0  -7  -3    9.52    1.25
   0  -7  -3    7.09    1.30
   0   7   3    9.47    0.67
   2   3  -7   26.07    1.42
   2   3  -7   24.21    2.60
  -2  -3   7   30.10    1.09
  -2  -3   7   28.97    1.27
   2   3  -7   25.84    2.77
  -1  -7   0   18.11    1.44
   1   7   0   15.52    1.27
   1   7   0   18.31    0.81
   1   7   0   15.58    1.94
  -1  -7   0   17.15    1.27
   1   7   0   20.26    1.30
  -2   4  -5   76.27    2.21
  -2   4  -5   81.56    2.44
   2  -4   5   73.97    2.69
  -2   4  -5   77.14    2.41
   2   6   7    3.68    0.99
   2   6   7    3.97    1.28
  -2  -6  -7    4.13    1.17
  -2  -6  -7    4.46    1.91
   1   3  -8   36.48    2.99
  -1  -3   8   40.51    1.30
  -1  -3   8   42.23    1.67
   1   3  -8   36.41    2.74
  -1   6  -2   46.21    1.96
  -1   6  -2   47.70    1.73
   1  -6   2   44.73    2.10
  -1   6  -2   44.71    1.87
   1  -6   2   50.70    1.99
   0  -7  -1   33.08    1.74
   0   7   1   35.29    1.74
   0   7   1   32.89    1.94
   0   7   1   35.29    1.19
   0   7   1   33.70    1.65
  -2  -4   6    9.88    0.85
   2   4  -6    8.27    1.71
   2   4  -6    7.27    3.09
   2   4  -6    9.26    1.22
  -2  -4   6    9.51    0.81
  -2  -4   6   11.40    0.66
   2   4  -6    9.72    2.45
   3   4  -4   47.08    1.53
  -3  -4   4   47.07    1.58
   3   4  -4   45.50    1.53
  -3  -4   4   43.50    1.59
   3   4  -4   43.29    2.64
   3   4  -4   43.42    1.84
  -3  -4   4   46.52    1.68
  -3  -4   4   44.78    1.55
   3   6   1    8.83    1.14
  -3  -6  -1    8.03    0.95
  -3  -6  -1    8.77    1.05
   3   6   1    7.46    0.87
   3   6   1   10.65    2.30
  -1  -4   7   61.40    2.18
  -1  -4   7   63.94    2.11
   1   4  -7   56.25    2.34
   1   4  -7   56.73    3.59
   1   4  -7   53.48    2.88
   1   4  -7   60.97    3.76
  -3  -6  -4   50.53    2.38
   3   6   4   47.93    3.05
  -3  -6  -4   50.17    2.12
  -3  -6  -4   51.83    2.35
   3   6   4   49.47    2.24
   3   6   4   52.20    1.83
  -1  -7  -5   62.92    2.59
  -1  -7  -5   67.08    2.69
  -1  -7  -5   59.38    3.10
   1   7   5   63.94    2.87
  -1  -7  -5   61.27    2.88
   1   7   5   66.71    2.14
   1   7   5   63.77    2.57
  -4   0   2    8.74    0.65
  -4   0   2    8.60    0.69
   4   0  -2    5.83    1.97
  -4   0   2    9.48    0.77
   4   2  -2   82.19    2.47
  -4  -2   2   82.99    2.54
  -4  -2   2   82.80    2.47
   4   2  -2   82.37    2.99
   4   2  -2   80.94    2.55
   4   3  -1  117.46    3.37
  -4  -3   1  119.33    3.46
  -4  -3   1  124.51    3.37
   4   3  -1  117.06    4.02
   4   3  -1  118.96    3.50
   4  -1   1   43.09    1.76
  -4   1  -1   44.50    1.57
  -1   3  -8   11.38    1.29
   1  -3   8   11.40    0.84
  -1   3  -8   10.14    0.59
   1  -3   8   10.61    1.00
  -1   3  -8   10.15    0.91
   4  -1   0   36.31    2.31
  -4   1   0   39.06    1.32
   4  -1   0   40.12    1.68
  -4   1   0   38.82    1.45
  -4   1   0   40.19    1.57
   3  -3   4  137.88    3.97
  -3   3  -4  130.75    3.57
  -3   3  -4  136.25    3.75
  -3   3  -4  143.77    3.80
   4   2   5  253.32    6.67
   4   2   5  244.72    6.53
  -4  -2  -5  249.80    6.87
   4   2   5  254.12    6.53
  -2  -7  -3   40.00    1.69
  -2  -7  -3   40.13    1.79
  -2  -7  -3   39.18    2.20
   2   7   3   37.66    2.87
   2   7   3   40.11    1.88
   2   7   3   38.30    1.49
   2   7   3   36.66    2.27
   3  -1   7   11.43    0.85
   2  -2   8   34.65    1.34
  -2   2  -8   36.81    1.29
   2  -2   8   36.50    1.56
  -2  -7  -2    6.68    0.95
   2   7   2    5.75    0.62
   2   7   2    5.65    0.99
   2   7   2    8.41    1.49
  -2  -7  -2    7.22    1.23
   2   7   2    7.28    2.29
  -1   2  -9   81.54    2.50
  -1   2  -9   83.54    3.18
   1  -2   9   80.68    2.66
   1  -2   9   79.87    2.47
   0  -7  -4   86.11    3.30
   0   7   4   84.28    2.57
   0  -7  -4   74.43    2.91
   0  -7  -4   75.87    3.28
   0   7   4   86.73    2.54
   0   7   4   86.44    2.37
   0  -7  -4   83.94    3.30
   0   7   4   78.05    3.13
  -1   5  -5    3.69    0.80
  -1   5  -5    3.24    0.69
   1  -5   5    3.38    0.68
  -1   5  -5    3.10    0.42
   1  -5   5    3.53    0.93
   4   4   2    1.13    0.61
   4   4   2    1.82    1.01
  -4  -4  -2    1.73    0.85
  -4  -4  -2    2.04    0.60
  -3  -2   6   81.24    2.34
   3   2  -6   68.86    3.09
   3   2  -6   72.58    2.16
   3   2  -6   72.58    4.50
  -3  -2   6   77.53    2.29
  -3  -2   6   79.20    2.28
   3   2  -6   73.04    2.33
  -3   4   1    0.39    0.52
  -3   4   1    0.29    0.56
   3  -4  -1    0.53    0.65
  -3   4   1   -0.28    0.43
   3  -4  -1    0.61    1.33
   3  -4  -1    0.35    1.29
  -1  -4 -10   25.38    2.84
   1   4  10   25.51    1.13
   1   4  10   27.22    1.22
  -1  -4 -10   26.58    2.89
   1   4  10   28.67    1.48
  -3   4   0   24.90    1.00
   3  -4   0   26.17    1.78
  -3   4   0   26.11    1.22
   3  -4   0   24.98    1.96
  -3   4   0   26.02    1.18
  -2  -2 -10    4.35    2.02
   2   2  10    5.41    0.64
  -2  -2 -10    5.97    1.34
   2   2  10    6.16    0.63
  -2   5   5   76.36    2.54
   2  -5  -5   64.08    3.48
  -2   5   5   74.53    2.05
   2  -5  -5   69.22    2.30
  -2   5   5   73.99    2.28
  -2   5   5   74.47    2.35
   2  -5  -5   62.68    3.45
   4   0   4   38.29    1.42
   4   0   4   40.51    1.64
  -4   0  -4   40.12    1.49
   4   4   3   65.77    2.67
   4   4   3   66.24    2.24
  -4  -4  -3   71.41    2.43
   4   4   3   65.02    2.27
   4   4   1   41.78    1.69
   4   4   1   40.56    1.59
  -4  -4  -1   42.35    1.65
   4   4   1   43.57    2.23
  -4  -4  -1   41.79    1.72
   4  -1   2    9.94    0.92
  -4   1  -2   10.25    0.79
  -4   1  -2    9.51    0.73
   0   7   0    0.04    0.33
   0  -7   0    0.24    0.88
   0   7   0   -0.56    0.75
   0   7   0    0.05    0.90
  -3  -5  -7  116.76    3.96
   3   5   7  119.25    3.54
   3   5   7  110.20    3.33
  -3  -5  -7  110.04    4.28
   3   5   7  109.56    3.51
   3   4   8    0.62    0.74
   3   4   8    0.13    0.58
  -3  -4  -8    0.35    1.66
  -3  -4  -8   -0.12    1.20
   4  -1  -1    4.02    1.71
  -4   1   1    4.54    0.69
   4  -1  -1    4.09    0.76
  -4   1   1    4.60    0.60
  -4   1   1    5.32    0.51
  -2  -7  -4   26.02    1.52
   2   7   4   25.46    1.19
  -2  -7  -4   26.44    1.96
  -2  -7  -4   23.68    1.74
   2   7   4   27.26    1.95
   1   6   8    1.55    0.55
   1   6   8    2.13    0.58
  -1  -6  -8   -0.31    2.08
  -1  -6  -8    1.14    1.34
  -1  -6  -8    0.73    1.64
   1   6   8    1.49    0.92
  -1   1  10   52.15    1.68
  -1   1  10   52.11    1.69
   1  -1 -10   49.47    3.60
   4   1   5   91.53    2.71
   4   1   5   94.76    2.88
   4   1   5   89.94    2.71
  -4  -1  -5   90.79    3.08
   3  -2   6    3.61    0.72
  -3   2  -6    3.43    0.50
   0   5   9   18.55    0.89
   0  -5  -9   17.95    2.51
   0   5   9   17.15    1.22
   0   5   9   17.23    0.98
   1   2  -9  168.52    6.15
  -1  -2   9  173.44    4.48
   1   2  -9  169.81    6.53
   1   2  -9  160.50    7.26
   4   3   5    5.90    0.74
  -4  -3  -5    5.83    1.05
   4   3   5    6.79    0.74
   4   3   5    6.00    0.91
   2   7   1   14.97    0.86
  -2  -7  -1   16.09    1.35
   2   7   1   14.51    2.62
   2   7   1   17.63    1.79
   2   7   1   16.37    1.26
   2  -4  -7   93.53    4.65
   2  -4  -7  100.53    3.03
  -2   4   7  109.20    2.93
  -2   4   7  109.20    3.10
  -2   4   7  105.16    3.24
   2  -4  -7   91.97    4.78
  -2  -2   8  116.96    3.23
   2   2  -8  101.33    4.56
  -2  -2   8  122.29    3.38
   2   2  -8  111.16    5.46
   3  -2  -6   70.33    2.50
  -3   2   6   77.85    2.15
   3  -2  -6   75.55    4.00
  -3   2   6   78.83    2.38
  -3   2   6   77.64    2.24
  -3   2   6   75.02    2.42
   3  -2  -6   68.77    4.05
  -3   4   2   40.11    1.51
   3  -4  -2   39.71    1.64
   3  -4  -2   38.86    2.47
  -3   4   2   40.67    1.21
   3  -4  -2   40.26    2.47
  -3   4   2   41.72    1.44
   2  -1   9    5.46    0.80
   2  -1   9    4.63    0.64
   0  -1  10   70.79    2.30
   0   1 -10   69.87    3.85
   0   1 -10   79.98    4.29
   0   1 -10   69.01    2.54
   0  -1  10   72.62    2.08
  -2   3   8    9.43    0.83
  -2   3   8    8.43    0.70
   2  -3  -8    5.41    2.25
  -2   3   8    9.69    0.64
   2  -3  -8    8.21    2.29
   2  -3  -8    8.39    0.76
   2  -3   7    3.58    0.62
  -2   3  -7    3.49    0.49
   2  -3   7    3.87    0.81
  -2   3  -7    3.68    0.55
  -3  -6   0   15.94    1.27
  -3  -6   0   16.39    1.13
   3   6   0   16.43    2.57
   3   6   0   16.29    1.10
  -2   5  -3    2.93    0.56
  -2   5  -3    3.16    0.66
   2  -5   3    3.20    1.09
  -2  -3 -10   42.55    2.44
   2   3  10   40.45    1.53
  -2  -3 -10   43.73    3.20
   2   3  10   42.50    1.57
   3   6   5  205.51    5.68
   3   6   5  198.54    5.89
   3   6   5  200.35    5.47
  -3  -6  -5  210.77    6.28
   3  -4   1    3.93    0.77
  -3   4  -1    2.83    0.64
   3  -4   1    3.36    1.12
  -3   4  -1    3.52    0.45
   1   6  -4    8.47    1.65
  -1  -6   4    8.45    0.95
   1   6  -4    8.72    0.79
  -1  -6   4    8.50    1.09
   1   6  -4    9.96    2.21
   1   6  -4    9.75    1.42
  -2  -6   3   10.61    1.11
   2   6  -3   10.82    0.62
  -2  -6   3   12.73    1.09
   2   6  -3   11.14    2.21
   2   6  -3    9.47    0.92
   2   6  -3   13.30    1.50
   2   6  -3   12.85    2.74
   2   1  10    3.01    0.47
  -2  -1 -10    3.26    1.17
  -3   3   5    0.45    0.61
   3  -3  -5    0.10    1.76
   3  -3  -5    0.72    0.66
  -3   3   5    0.66    0.37
   3  -3  -5   -1.62    1.97
   0  -5   6   60.32    2.27
   0   5  -6   57.28    2.29
   0   5  -6   59.53    2.81
   0   5  -6   65.03    2.84
   0  -5   6   61.50    2.09
   1  -4  -9   15.20    2.67
  -1   4   9   17.00    0.83
   1  -4  -9   16.60    2.64
  -1   4   9   18.43    1.09
  -1   4   9   18.55    0.96
   1   7  -1  100.15    3.27
   1   7  -1   93.88    3.73
  -1  -7   1   90.86    3.29
  -1  -7   1   94.17    3.15
   1   7  -1   88.00    3.06
   1   7  -1   98.38    4.18
   1  -2 -10   30.87    3.29
  -1   2  10   37.52    1.35
  -1   2  10   37.58    1.38
   1  -2 -10   32.99    3.57
  -1   6   6   15.58    0.90
   1  -6  -6   16.82    1.99
   1  -6  -6   13.14    2.10
  -1   6   6   16.85    0.74
  -1   6   6   16.33    1.05
  -1   6   6   17.50    1.24
   1  -6  -6   15.82    0.87
   0   6  -4   13.94    1.34
   0  -6   4   12.64    1.06
   0  -6   4   11.10    1.20
   0   6  -4   12.10    0.77
   0   6  -4   13.83    1.33
   4   4   4   43.65    1.64
   4   4   4   41.97    1.99
  -4  -4  -4   40.08    1.82
   4   4   4   38.08    1.60
   2   5  -5   16.39    2.85
   2   5  -5   18.35    1.62
   2   5  -5   21.28    3.24
  -2  -5   5   21.55    1.23
  -2  -5   5   21.43    0.95
  -2  -5   5   21.41    1.15
   1  -4   7   15.11    0.96
  -1   4  -7   15.07    1.12
   1  -4   7   14.32    1.11
  -1   4  -7   14.65    1.42
  -1   4  -7   13.82    0.84
   4   1  -3   30.03    1.26
  -4  -1   3   29.37    1.18
  -4  -1   3   29.94    1.25
   1   0 -10    9.41    1.79
  -1   0  10    7.31    0.75
   1   0 -10    7.81    2.28
  -1   0  10    6.56    0.57
   0  -4 -10   24.06    3.11
   0   4  10   30.77    1.30
  -4  -4   0    8.40    0.88
   4   4   0    8.00    1.39
  -4  -4   0    9.31    0.83
   4   4   0    8.49    0.77
  -1   5   8    7.30    0.92
  -1   5   8    6.87    0.68
   1  -5  -8    4.93    2.17
   1  -5  -8    6.71    2.24
  -1   5   8    6.61    0.57
   0   7   5   -0.36    0.40
   0   7   5   -0.60    0.85
   0  -7  -5    0.64    1.24
   0   7   5   -0.19    0.97
   0   7   5   -0.16    0.52
   0  -7  -5    1.29    1.12
  -3  -5   3   23.96    1.07
   3   5  -3   23.84    1.13
   3   5  -3   22.20    1.47
   3   5  -3   19.92    2.41
  -3  -5   3   26.72    1.26
  -3  -5   3   25.09    1.36
   2   5   9    0.60    0.58
  -2  -5  -9   -0.30    2.20
   2   5   9    0.63    0.87
  -2  -5  -9   -0.65    1.27
  -1  -5   6   86.64    2.78
   1   5  -6   83.27    4.09
   1   5  -6   91.24    3.26
  -1  -5   6   91.16    2.96
   1   5  -6   91.51    4.48
   1   7   6   57.42    2.67
  -1  -7  -6   55.21    3.13
   1   7   6   54.72    2.39
  -1  -7  -6   55.10    2.65
   1   7   6   56.41    1.94
  -1  -7  -6   54.16    2.51
  -4   1  -3   58.65    1.90
   4  -1   3   56.65    2.10
  -4   1  -3   58.97    1.99
   2   7   5    0.68    1.35
   2   7   5    1.79    0.93
  -2  -7  -5    4.28    1.54
  -2  -7  -5    2.27    1.26
  -2  -7  -5    1.65    0.98
   2   7   5    1.90    0.63
  -4   1   2    2.02    0.51
  -4   1   2    2.44    0.50
   4  -1  -2    5.18    1.99
  -4   1   2    3.14    0.65
  -1   1 -10    3.87    1.24
   1  -1  10    5.13    0.70
  -1   1 -10    5.87    0.55
  -1   1 -10    6.10    1.58
  -4   0   3   28.91    1.16
   4   0  -3   25.98    1.45
   4   0  -3   24.69    2.67
  -4   0   3   29.65    1.28
  -4   0   3   26.86    1.18
  -4  -3   2    4.53    0.66
   4   3  -2    5.38    0.74
   4   3  -2    5.49    1.27
  -4  -3   2    6.23    0.65
   4   3  -2    6.14    0.63
   3  -4  -3   31.96    2.42
   3  -4  -3   38.10    1.59
  -3   4   3   39.10    1.58
   3  -4  -3   37.59    2.52
  -3   4   3   36.30    1.38
  -3   4   3   36.79    1.45
  -3   4   3   37.01    1.17
  -1   6  -3   49.62    1.70
  -1   6  -3   46.61    1.95
   1  -6   3   45.02    1.90
  -1   6  -3   46.45    1.99
   1  -6   3   49.35    2.22
  -2  -7   0   57.14    2.32
   2   7   0   51.78    1.71
   2   7   0   49.02    2.10
   2   7   0   53.76    3.80
   2  -1  -9   -0.29    0.92
   2  -1  -9    0.14    2.56
  -2   1   9    0.83    0.49
   2  -1  -9    1.04    2.28
  -2   1   9    0.82    0.56
  -2   1   9    0.71    0.44
   0   7  -1    0.40    1.09
   0   7  -1    0.68    0.75
   0   7  -1    0.25    0.90
   0  -7   1    1.09    0.95
   3   0  -7    0.79    2.63
   3   0  -7    0.70    0.43
   3   0  -7    1.77    0.96
  -3   0   7    1.32    0.49
  -3   0   7    0.58    0.44
   2   0  -9    1.43    2.68
   2   0  -9   -0.10    2.09
  -2   0   9    0.32    0.40
   2   0  -9    1.48    1.23
  -2   0   9    0.49    0.56
  -2   0   9    0.60    0.45
   4   2  -3   31.39    1.34
   4   2  -3   28.97    1.19
  -4  -2   3   30.05    1.28
   3  -4   2   -0.43    0.64
  -3   4  -2    0.31    0.58
  -3   4  -2   -0.26    0.52
  -3   4  -2   -0.07    0.35
   0   6   8   61.95    2.54
   0  -6  -8   69.30    3.58
   0   6   8   70.66    2.10
   4   2   6    3.23    0.68
   4   2   6    3.38    0.59
  -4  -2  -6    2.68    1.08
   3   2   9   29.48    1.27
   2   6   8    6.90    0.78
  -2  -6  -8    2.44    2.05
  -2  -6  -8    5.08    1.32
   2   6   8    5.85    1.08
  -4   0  -5   -0.12    0.57
   4   0   5    0.06    0.49
   4   0   5   -0.06    0.63
   4   4   5    1.09    0.64
   4   4   5    1.13    0.66
  -4  -4  -5    0.94    0.95
   3   6  -1   -0.90    2.14
   3   6  -1   -0.03    0.65
  -3  -6   1   -0.34    0.79
   3   6  -1    0.10    1.07
  -3  -6   1   -0.04    0.95
  -3   1   7    3.83    0.51
  -3   1   7    4.68    0.52
  -3   1   7    4.43    0.59
  -3   1   7    4.22    0.61
   3  -1  -7    3.23    2.58
   3  -1  -7    4.03    0.50
   3  -1  -7    4.67    0.95
   1   2  11    2.42    0.55
   1   2  11    2.64    0.51
  -1  -2 -11    1.27    2.25
   3   6   6    0.50    0.77
   3   6   6    0.19    0.96
  -3  -6  -6    1.55    1.70
  -3  -3  -9   70.59    3.25
   3   3   9   63.17    2.18
   3   3   9   61.31    2.09
  -3   3  -5    4.06    0.57
  -3   3  -5    4.99    0.61
   3  -3   5    4.53    0.79
  -3  -1   7   68.35    2.05
  -3  -1   7   69.10    2.07
   3   1  -7   64.27    1.93
  -3  -1   7   65.28    2.08
   3   1  -7   61.32    2.75
   3   1  -7   66.69    2.06
   3   1  -7   65.47    4.39
   2   4  10    4.29    0.71
   2   4  10    4.00    0.66
  -2  -4 -10    4.99    2.29
  -4  -3  -6    0.46    0.98
   4   3   6    0.31    0.58
   4   3   6    0.05    0.62
  -4  -4   1    0.31    0.67
   4   4  -1    1.12    0.69
   4   4  -1    1.54    1.24
  -4  -4   1    0.98    0.60
   4   4  -1    0.35    0.60
   2  -5  -6    6.30    0.68
   2  -5  -6    5.33    2.15
  -2   5   6    5.92    0.65
  -2   5   6    6.35    0.67
  -2   5   6    5.62    0.86
  -2   5   6    6.96    0.53
  -1   3  10   41.23    1.51
   1  -3 -10   39.16    3.79
   1  -3 -10   36.09    3.51
   2   0  10   17.27    0.96
   0   2  11   34.53    1.33
   0   2  11   36.44    1.31
   0  -2 -11   30.79    3.61
   2  -2  -9  144.65    6.61
   2  -2  -9  138.26    6.24
   2  -2  -9  147.85    4.52
  -2   2   9  162.47    4.30
  -2   4  -6   26.49    1.18
   2  -4   6   27.52    1.55
  -2   4  -6   26.19    1.21
   0  -1 -11  154.44    6.43
   0  -1 -11  132.83    6.16
   0  -1 -11  153.97    6.67
   0   1  11  159.70    4.21
  -1  -1 -11    2.39    1.94
   1   1  11    1.12    0.47
  -1  -1 -11    1.18    1.22
  -1  -1 -11    1.19    2.15
   4   1   6   17.38    1.09
   4   1   6   16.51    0.92
   4   1   6   17.50    0.90
  -3  -3   6    1.28    0.47
  -3  -3   6    0.90    0.58
  -3  -3   6    1.29    0.60
   3   3  -6    2.14    1.68
   3   3  -6    0.43    0.43
   3   3  -6    1.41    0.69
  -3  -4   5    0.74    0.49
   3   4  -5    1.39    0.50
  -3  -4   5    1.52    0.68
   3   4  -5    1.04    0.81
   3   4  -5    1.81    1.78
   3   4  -5    1.56    1.73
  -3  -4   5    1.21    0.63
  -1  -7   2   40.75    2.11
   1   7  -2   42.80    2.99
  -1  -7   2   48.84    2.15
   1   7  -2   45.96    1.88
   1   7  -2   44.78    2.21
   1   7  -2   41.07    2.53
   4  -1   4   15.98    1.07
  -4   1  -4   16.24    0.90
  -4   1  -4   17.60    0.97
   2   7   6    1.04    0.63
  -2  -7  -6    1.38    1.04
  -2  -7  -6    1.17    1.62
   2   7   6    2.28    1.50
   2   7   6    1.97    1.00
  -1  -1  10   19.69    1.07
   1   1 -10   15.93    2.15
   1   1 -10   19.99    2.97
  -1  -1  10   20.41    0.90
   0   3  -9   43.28    2.24
   0   3  -9   50.60    3.04
   0   3  -9   45.67    2.66
   0  -3   9   44.65    1.69
   0  -3   9   45.53    1.86
   0  -7  -6    1.60    1.43
   0  -7  -6    4.07    1.38
   0   7   6    3.79    1.00
   0   7   6    3.59    0.52
   0   7   6    3.86    0.68
   0   7   6    3.92    1.10
   4  -2   0    1.09    1.51
   4  -2   0    1.39    0.68
  -4   2   0    0.83    0.52
  -1  -3 -11    1.87    2.43
   1   3  11    3.92    0.58
  -1  -3 -11    3.12    2.46
   1   3  11    4.90    0.65
   4  -1  -3   35.34    2.98
  -4   1   3   36.30    1.52
  -4   1   3   37.71    1.35
   4  -1  -3   35.68    1.67
  -3   4   4   98.30    2.90
  -3   4   4   96.63    3.06
  -3   4   4   97.16    2.87
   3  -4  -4   88.69    4.20
   3  -4  -4   91.16    2.99
   3  -4  -4   96.79    4.28
  -3   4   4   99.50    2.63
   2   1  -9   35.90    2.54
   2   1  -9   32.22    3.60
  -2  -1   9   38.67    1.37
  -2  -1   9   38.98    1.48
   3   5   8   -0.88    0.81
  -3  -5  -8   -0.44    1.19
   3   5   8    0.26    0.56
  -2   5  -4    0.42    0.56
  -2   5  -4    0.19    0.64
  -2   5  -4    0.50    0.48
   2  -5   4   -0.35    1.07
  -2   6   1   17.10    0.79
  -2   6   1   17.76    1.12
   2  -6  -1   15.34    1.77
   2  -6  -1   14.41    1.10
   2  -6  -1   16.12    1.74
  -2   6   1   16.79    1.13
   4  -2   1    8.97    1.70
  -4   2  -1    6.72    0.66
   4  -2   1    6.53    0.87
  -4   2  -1    8.37    0.80
  -2   6   2   53.38    2.03
  -2   6   2   52.23    1.67
  -2   6   2   52.40    2.04
   2  -6  -2   49.25    2.74
   2  -6  -2   50.73    1.95
   2  -6  -2   53.24    2.76
   2   7  -1    4.90    1.29
  -2  -7   1    2.79    1.07
   2   7  -1    5.27    1.02
   2   7  -1    6.51    1.64
  -2  -7   1    5.21    1.06
   2   7  -1    4.48    0.54
   2   7  -1    7.12    2.60
   0  -4   8    0.33    0.80
   0   4  -8    0.39    1.43
   0  -4   8    0.85    0.71
   0   4  -8    2.12    1.24
   1   5  10    8.87    0.81
  -1  -5 -10    9.09    2.40
   1   5  10    8.88    1.08
  -1  -5 -10    7.07    2.59
  -4   2   1   13.64    0.96
  -4   2   1   13.59    0.70
  -4   2   1   12.34    0.84
   4  -2  -1   14.86    2.09
   4   5   2   35.98    1.58
   4   5   2   36.38    2.35
   4   5   2   36.13    1.70
  -4  -5  -2   38.62    1.84
   4   5   3    0.81    1.41
  -4  -5  -3   -0.67    1.03
   4   5   3    0.82    0.75
  -4  -5  -3    0.30    0.84
  -3   4  -3    9.95    0.77
   3  -4   3    7.83    0.95
  -3   4  -3    9.79    0.79
  -1   6   7    6.82    0.68
   1  -6  -7    7.20    2.09
  -1   6   7    6.39    0.53
  -1   6   7    6.63    0.99
   1  -6  -7    4.50    2.16
  -1   7   2    3.08    0.93
  -1   7   2    3.02    0.63
  -1   7   2    2.67    0.45
   1  -7  -2    2.61    1.39
   1  -7  -2    1.83    1.05
  -1   7   2    2.11    0.86
   1  -7  -2    0.20    1.33
  -1  -7  -7   48.67    2.51
  -1  -7  -7   42.55    2.59
  -1  -7  -7   43.23    3.13
   1   7   7   44.36    2.18
   1   7   7   45.52    1.64
   1   7   7   46.26    1.73
   1   7   7   43.67    2.30
   4   1  -4    2.90    0.62
  -4  -1   4    2.40    0.56
  -4  -1   4    1.75    0.54
   4   1  -4    3.83    1.02
  -3   3   6   18.24    1.09
   3  -3  -6   17.97    2.59
   3  -3  -6   18.10    1.13
  -3   3   6   17.67    0.98
   3  -3  -6   17.65    2.65
  -3   3   6   18.83    0.85
  -1   5  -6   47.96    1.81
  -1   5  -6   48.05    2.04
   1  -5   6   46.52    1.77
   1  -5   6   47.79    2.10
   0   7  -2   22.61    1.25
   0  -7   2   26.60    1.62
   0   7  -2   26.53    1.77
   0   7  -2   21.85    1.67
  -2   6   0   15.78    1.07
   2  -6   0   10.68    1.53
  -2   6   0   13.99    0.67
  -2   6   0   13.57    1.07
   1  -7  -1   39.69    2.33
  -1   7   1   42.21    1.90
  -1   7   1   40.63    1.79
  -1   7   1   39.73    1.31
  -1   7   1   41.66    1.65
   1  -7  -1   37.71    1.98
  -4  -3   3  108.34    3.16
   4   3  -3  100.24    3.92
   4   3  -3  105.71    3.21
  -4  -3   3  105.95    3.08
   4   3  -3  105.24    3.06
   0   3  11   50.58    1.66
   0  -3 -11   40.34    3.69
   0   3  11   47.37    1.71
  -2   6   3    2.20    0.51
   2  -6  -3    0.92    1.54
  -2   6   3    2.80    0.76
   2  -6  -3    1.75    0.67
   4   0  -4    1.67    0.51
   4   0  -4    3.92    2.42
  -4   0   4    1.33    0.50
  -4   0   4    1.94    0.59
  -4   0   4    1.49    0.60
   4   0  -4    1.10    0.84
  -1   7   3   39.42    1.83
  -1   7   3   37.68    1.45
  -1   7   3   39.22    1.38
  -1   7   3   41.81    1.91
   1  -7  -3   36.83    2.43
   1  -7  -3   39.49    2.18
   1  -7  -3   39.60    2.42
   1   6   9    8.87    0.81
   1   6   9    8.81    1.20
  -1  -6  -9    9.30    2.21
   1   6   9    9.71    0.77
  -1  -6  -9    7.04    2.41
   2   4  -7    1.15    2.89
   2   4  -7    0.74    1.58
   2   4  -7   -1.12    2.63
  -2  -4   7    0.72    0.43
  -2  -4   7    0.08    0.64
   2   4  -7   -0.05    1.04
  -2  -4   7    0.73    0.75
  -3  -4  -9   30.58    2.59
  -3  -4  -9   27.64    2.14
   3   4   9   29.06    1.33
   3   4   9   29.08    1.47
   4  -2   2   27.65    1.42
  -4   2  -2   27.92    1.19
  -4   2  -2   30.08    1.34
   2   6  -4    5.32    2.24
  -2  -6   4    7.39    1.01
  -2  -6   4    7.57    1.04
   2   6  -4    2.27    2.49
   2   6  -4    7.80    1.55
  -4  -5  -1   24.50    1.45
   4   5   1   23.43    2.06
   4   5   1   22.10    1.23
   4   5   1   21.76    1.32
   3  -2   7   38.22    1.59
   0   0  11   89.11    2.57
   0   0 -11   83.47    4.49
   0   0 -11   80.80    4.58
   0   0  11   91.54    2.81
   0   0 -11   94.62    4.84
   0   2 -10   58.39    2.45
   0  -2  10   56.33    1.97
   0   2 -10   48.94    3.27
  -3   2   7   10.43    0.85
   3  -2  -7   11.27    2.52
  -3   2   7   10.51    0.69
  -3   2   7    9.95    0.78
   3  -2  -7   10.09    0.99
   2   3  -8   92.92    4.79
  -2  -3   8   95.36    2.76
  -2  -3   8  102.58    2.98
   2   3  -8   89.47    4.90
   4   5   4    5.37    0.91
  -4  -5  -4    4.97    1.04
   4   5   4    5.12    0.81
  -4  -4  -6    9.87    1.32
   4   4   6    9.83    0.86
   4   4   6    9.81    0.91
   2  -4  -8    0.90    0.56
  -2   4   8    0.24    0.44
  -2   4   8   -0.06    0.71
  -2   4   8    0.72    0.54
   2  -4  -8   -0.72    2.48
  -3  -2   7    3.27    0.55
   3   2  -7    2.91    1.53
   3   2  -7    3.09    0.66
  -3  -2   7    2.71    0.52
   3   2  -7    2.12    2.77
  -3  -2   7    3.43    0.66
   1   6  -5   29.84    2.01
  -1  -6   5   33.30    1.52
   1   6  -5   27.37    2.77
   1   6  -5   29.12    2.28
  -1  -6   5   31.97    1.70
  -3  -5   4    6.93    0.67
   3   5  -4    6.72    0.75
   3   5  -4    5.97    2.24
  -3  -5   4    7.12    0.96
  -3  -5   4    7.19    0.88
   3   5  -4    6.02    1.18
   0  -6   5    6.40    0.94
   0   6  -5    5.01    1.29
   0   6  -5    6.80    1.15
   0  -6   5    7.54    1.17
   0   6  -5    6.26    1.20
  -1   6  -4    4.77    0.90
   1  -6   4    3.65    0.93
   1  -6   4    5.37    1.20
   1   0  11   18.46    0.87
  -1   0 -11   19.83    1.74
  -1   0 -11   16.17    2.17
   1   0  11   20.24    1.11
  -4   2   2  143.69    3.83
  -4   2   2  145.77    4.02
   4  -2  -2  128.63    5.25
   4  -2  -2  147.33    4.30
  -4   2   2  143.54    4.15
   3   6  -2   29.43    3.26
   3   6  -2   34.02    2.06
   3   6  -2   26.94    3.24
   3   6  -2   30.85    1.48
  -3  -6   2   38.77    1.89
  -3  -6   2   35.80    1.62
  -1  -4   8    0.21    0.69
   1   4  -8    1.68    2.11
  -1  -4   8    0.83    0.82
   1   4  -8    0.47    1.50
   1   4  -8   -2.15    2.52
   4   4  -2   -1.00    0.80
   4   4  -2    0.07    0.59
   4   4  -2    0.07    1.30
  -4  -4   2   -0.08    0.61
  -4  -4   2    0.64    0.75
  -4  -4   2    0.60    0.57
   3   6   7   35.39    1.75
   3   6   7   33.49    1.49
   3   6   7   36.50    1.97
   4   2  -4    0.45    0.59
   4   2  -4   -1.03    1.14
  -4  -2   4   -0.44    0.53
   4   2  -4   -0.25    0.50
   1   3  -9   66.29    4.62
  -1  -3   9   61.65    2.25
   1   3  -9   52.76    3.36
   1   3  -9   55.44    3.58
  -1   7   0    2.34    0.70
  -1   7   0    1.85    0.88
   1  -7   0    3.26    1.29
  -1   7   0    3.07    0.82
   1  -7   0    1.82    1.00
   2  -2   9  255.24    6.63
   2  -2   9  254.46    6.87
  -2   2  -9  256.87    6.53
   4   0   6   13.19    0.83
   4   0   6   14.18    1.00
   1  -7  -4   12.90    2.01
  -1   7   4   14.24    1.17
  -1   7   4   13.51    0.82
   1  -7  -4   12.59    1.84
   1  -7  -4   13.53    0.98
  -2   6  -1  195.03    5.24
  -2   6  -1  194.68    5.32
   2  -6   1  186.10    5.91
  -1   3  -9   80.64    2.61
   1  -3   9   72.40    2.62
  -1   3  -9   77.05    3.08
   1  -3   9   75.68    2.44
  -4  -2  -7   13.28    1.49
   4   2   7   14.31    0.95
   4   2   7   13.89    0.88
   0  -5 -10   75.54    4.49
   0   5  10   87.15    2.69
   0   5  10   86.04    2.53
   0   5  10   80.03    2.86
   2  -3  -9   48.46    4.09
  -2   3   9   64.82    2.00
   2  -3  -9   62.36    4.28
  -2   3   9   64.12    2.12
  -2   6   4    0.20    0.67
   2  -6  -4    1.56    1.71
  -2   6   4    0.60    0.49
  -2   6   4   -0.69    0.80
   2  -6  -4    0.60    0.61
  -2   3  -8   32.10    1.31
   2  -3   8   30.96    1.55
  -2   3  -8   32.80    1.17
  -4  -5   0   10.93    1.09
   4   5   0    9.51    1.86
   4   5   0   10.76    0.91
   1   4  11   11.63    0.90
  -1  -4 -11   14.63    2.84
  -1  -4 -11   13.53    2.85
   1   4  11   13.94    0.86
   2   5  -6   23.11    3.27
  -2  -5   6   25.38    1.37
  -2  -5   6   23.91    1.29
   2   5  -6   26.18    1.92
   2   5  -6   29.29    3.71
  -1   5   9   59.19    1.88
  -1   5   9   59.08    2.24
  -1   5   9   59.46    2.03
   1  -5  -9   63.90    4.18
   1  -5  -9   53.16    3.82
   4   3   7   47.13    1.84
   4   3   7   51.91    1.84
  -4  -3  -7   49.16    2.44
   4  -1   5    6.10    0.66
   4  -1   5    5.19    0.84
  -4   1  -5    6.80    0.71
   2   7   7   13.60    0.98
   2   7   7   15.09    1.75
  -2  -7  -7   15.33    2.16
  -2  -7  -7   13.52    1.54
   2   7   7   15.21    1.40
   4  -2   3   62.64    2.34
  -4   2  -3   68.11    2.24
  -4   2  -3   66.52    2.09
   3   7   3   30.69    3.29
   3   7   3   35.59    2.21
  -3  -7  -3   39.75    2.13
  -3  -7  -3   34.72    1.74
   3   7   3   33.35    1.77
   3   7   3   35.63    1.50
   0  -5   7    0.47    0.69
   0   5  -7    0.98    0.76
   0   5  -7   -0.68    1.39
   0  -5   7    0.79    0.90
   0   5  -7    0.41    1.29
  -3   4   5   21.01    1.06
  -3   4   5   22.18    1.08
   3  -4  -5   22.07    2.64
  -3   4   5   22.53    0.88
   3  -4  -5   20.08    1.17
   3  -4  -5   22.15    2.52
  -3   4   5   20.70    1.23
   4  -1  -4   11.99    2.68
  -4   1   4   12.44    0.76
  -4   1   4   13.74    0.96
   4  -1  -4   12.48    1.13
  -4  -5  -5   78.05    2.96
   4   5   5   77.93    2.72
  -2  -2 -11    9.60    1.54
  -2  -2 -11    7.80    2.32
   2   2  11    8.87    0.75
  -1   2 -10   20.05    1.72
   1  -2  10   21.55    1.28
   1  -2  10   19.44    1.08
  -1   2 -10   20.38    1.03
  -3  -7  -2    4.08    1.18
  -3  -7  -2    3.63    1.08
   3   7   2    4.10    0.71
   3   7   2    2.74    2.62
   3   7   2    4.22    0.97
   2   5  10    2.23    0.97
  -2  -5 -10    1.92    2.39
   2   5  10    3.42    0.71
   0   7   7    0.43    0.94
   0   7   7    1.39    0.51
   0   7   7    0.97    0.93
   0  -7  -7    0.40    1.71
   0   7   7    1.48    0.64
   1  -4 -10   71.41    4.68
  -1   4  10   84.81    2.51
  -1   4  10   85.42    2.63
   1  -4 -10   85.16    4.92
  -2   5   7   11.25    1.02
  -2   5   7    9.82    0.62
   2  -5  -7    8.16    0.73
  -2   5   7   10.10    0.81
   2  -5  -7    7.68    2.40
   0  -6  -9   52.88    3.49
   0   6   9   49.91    2.25
   0   6   9   56.62    1.82
   2   7  -2  176.44    6.01
  -2  -7   2  180.42    5.35
   2   7  -2  172.66    5.17
  -2  -7   2  198.69    5.45
   2   7  -2  172.75    5.83
   2   7  -2  163.01    6.99
   2   6   9   72.60    2.77
  -2  -6  -9   73.36    4.13
   3   7   4    3.52    0.75
   3   7   4    2.36    1.24
  -3  -7  -4    3.38    1.25
   3  -3   6    0.10    0.72
  -3   3  -6    0.72    0.53
  -3   3  -6    0.30    0.46
   1   7  -3   39.83    2.17
   1   7  -3   34.54    2.34
  -1  -7   3   39.57    2.04
  -1   4  -8   17.41    1.22
   1  -4   8   14.83    1.04
  -1   4  -8   16.86    1.54
   1  -4   8   13.17    1.16
   2  -1  10   24.93    1.17
   2  -1  10   23.10    1.33
   2   3  11   -0.23    0.55
  -2  -3 -11    0.11    2.31
   2   3  11   -0.03    0.57
   4   1   7   14.51    0.87
   4   1   7   16.15    0.95
   2   2  -9   -0.66    2.58
   2   2  -9    3.14    2.17
  -2  -2   9    1.85    0.46
  -2  -2   9    2.03    0.69
   1   5  -7    8.02    2.41
  -1  -5   7    9.58    1.05
   1   5  -7    7.57    1.21
   3  -4   4    1.07    0.71
  -3   4  -4    0.67    0.56
  -3   4  -4   -0.02    0.55
   4  -2  -3    7.69    1.00
   4  -2  -3    7.41    2.17
  -4   2   3    6.82    0.62
  -1  -8  -3   21.10    1.68
  -1  -8  -3   24.59    1.52
   1   8   3   24.59    1.67
  -1  -8  -3   22.95    2.02
   1   8   3   23.03    1.66
   1   8   3   23.74    1.09
  -1   7  -1    5.87    0.89
   1  -7   1    7.57    1.11
   1   8   2   26.60    1.90
   1   8   2   26.24    1.71
   1   8   2   28.02    1.14
  -1  -8  -2   25.65    1.52
  -1  -8  -2   23.97    1.93
   3   7   1   -0.17    0.61
   3   7   1   -0.96    0.85
  -3  -7  -1    0.99    1.02
   3   7   1    2.04    2.66
  -3  -7  -1    0.45    1.05
   1   2 -10    5.69    3.21
   1   2 -10    5.67    2.09
  -1  -2  10    7.89    0.61
  -1   7   5    3.88    0.62
  -1   7   5    3.11    0.89
   1  -7  -5    3.49    0.69
   1  -7  -5    2.22    1.61
   2   1  11   11.44    0.74
  -2  -1 -11    8.69    1.51
   0   4  11    4.61    0.68
   0  -4 -11    5.26    2.94
  -3   0   8   20.41    1.03
  -3   0   8   20.72    0.97
   3   0  -8   16.35    3.41
   3   0  -8   20.43    1.63
   0  -7   3   79.07    2.86
   0   7  -3   74.66    3.04
  -2   5  -5    6.97    0.76
  -2   5  -5    6.22    0.83
   2  -5   5    4.35    1.17
   2  -6   2  103.68    3.85
  -2   6  -2  111.65    3.29
   1   8   4   20.13    1.06
   1   8   4   21.39    1.96
  -1  -8  -4   18.81    1.49
  -1  -8  -4   19.04    1.74
  -1  -8  -4   18.37    2.07
  -1   2  11    2.52    0.55
  -1  -7  -8   31.90    2.27
   1   7   8   31.54    1.32
  -1  -7  -8   27.00    2.96
  -1  -7  -8   28.32    2.52
  -3   5   1    6.53    0.61
   0  -1  11    9.06    0.63
   0   1 -11    8.87    2.61
   3   7   5   80.86    2.64
  -3  -7  -5   80.57    3.38
   3   7   5   80.47    3.33
   3   2  10    3.94    0.66
   4   4   7    5.13    0.82
  -4  -4  -7    5.27    1.29
   4   4   7    5.58    0.86
   4   5  -1   39.94    1.66
  -4  -5   1   41.07    1.79
  -4  -5   1   40.78    1.68
  -3   1   8    7.71    0.72
  -3   1   8    6.97    0.67
   3  -1  -8    7.00    1.13
  -3   5   0   57.11    1.77
  -3   5   0   55.84    2.07
   3   5   9    2.34    0.87
  -2   6   5   19.36    1.14
  -2   6   5   19.23    1.00
   2  -6  -5   19.35    1.12
   2  -6  -5   17.63    2.42
   1   8   1   12.63    1.34
  -1  -8  -1   11.92    1.50
  -1  -8  -1   10.68    1.09
   1   8   1   14.06    1.70
   4   1  -5   24.04    1.06
   4   1  -5   22.67    1.69
   4   1  -5   24.97    1.17
  -4  -3   4   -0.05    0.60
   4   3  -4   -0.18    0.70
   4   3  -4    0.02    0.54
  -3   5   2   12.26    0.77
   3  -5  -2   12.56    1.05
   3   3  10    1.10    0.64
  -3  -3 -10    2.27    1.83
  -2   4  -7    1.08    0.57
   2  -4   7    1.00    0.95
  -2   4  -7    1.19    0.52
  -1   6   8   16.14    1.30
   1  -6  -8   13.64    2.45
  -1   6   8   14.02    0.77
   4   0  -5    4.29    1.05
  -4   0   5    5.38    0.75
   4   0  -5    4.52    2.69
  -4   0   5    4.35    0.59
   4   0  -5    4.58    0.65
  -2   1  10   43.55    1.61
  -2   1  10   48.47    1.71
   2  -1 -10   43.23    3.67
  -3  -4   6    0.41    0.52
  -3  -4   6    0.68    0.68
  -3  -4   6    0.99    0.71
   3   4  -6    0.52    0.88
   3   4  -6    0.54    1.89
  -1   0  11  103.14    2.94
  -4   2  -4   11.31    0.76
   4  -2   4   12.28    1.08
  -4   2  -4   13.54    0.91
   4   4  -3    2.35    0.87
  -4  -4   3    3.32    0.90
   4   4  -3    3.15    0.66
  -4  -4   3    1.94    0.66
   4   5   6    2.46    0.81
  -4  -5  -6    2.09    1.11
   3   1  -8    6.04    3.24
   3   1  -8    4.58    1.44
  -3  -1   8    6.34    0.68
  -3  -1   8    6.61    0.72
  -3   3   7    0.44    0.67
  -3   3   7    0.02    0.45
   3  -3  -7   -0.15    0.73
   3   6  -3   27.45    1.37
   3   6  -3   28.23    3.57
  -3  -6   3   24.93    1.44
  -3  -6   3   29.59    1.66
   3   6  -3   30.13    1.97
  -1   1 -11   -1.62    1.59
  -1   1 -11    0.42    1.24
   2   0 -10    5.40    2.49
  -2   0  10    5.07    0.76
   2   4  11   39.91    1.59
  -2  -4 -11   35.41    3.35
   3   3  -7   41.66    2.93
   3   3  -7   45.01    3.68
  -3  -3   7   46.73    1.72
  -3  -3   7   43.21    1.71
  -3  -7   0   69.40    2.63
   3   7   0   56.17    4.27
   3   7   0   65.63    2.15
   3   7   0   62.71    2.48
   1   8   5    3.38    1.52
  -1  -8  -5    1.96    1.45
  -1  -8  -5    2.97    1.76
   1   8   5    2.56    0.66
  -1  -8  -5    3.25    1.18
  -3   5  -1  154.59    4.39
   2   8   3    8.61    0.80
  -2  -8  -3    9.26    1.64
   4  -3   0   12.42    1.94
  -4   3   0   12.05    0.83
   3  -5  -3   47.22    1.92
  -3   5   3   49.77    1.71
  -2  -6   5   83.29    2.86
   2   6  -5   74.21    3.34
   0   8   2   59.51    2.40
   0  -8  -2   53.15    2.60
   0   8   2   55.61    2.19
   0   8   3   42.86    1.49
   0  -8  -3   39.97    2.29
   0   8   3   40.26    1.71
   0  -8  -3   39.34    2.39
  -1   6  -5    1.93    0.83
   2   8   2   93.00    3.39
  -2  -8  -2   97.83    3.69
   2   8   2   95.08    4.41
   2   8   2   95.02    2.83
  -2   2  10   10.43    0.80
   2  -2 -10    7.41    2.87
   4   2  -5   11.15    0.77
   4   2  -5   11.38    0.90
  -4  -2   5   11.99    0.88
  -2  -7  -8   19.72    2.68
   4  -3  -1   18.53    2.12
  -4   3   1   15.68    0.92
  -1   7  -2  255.33    6.66
   1  -7   2  240.37    6.85
   4  -1   6   38.85    1.70
   1   8   0   44.29    2.07
   2   8   4   73.83    2.42
  -2  -8  -4   77.36    3.48
  -1   3  11    0.60    0.56
  -4   3  -1    5.70    0.64
   4  -3   1    6.29    1.74
   4  -2  -4   33.45    3.17
  -4   2   4   37.32    1.34
   1  -5   7   48.46    1.87
  -1   5  -7   53.86    2.19
  -1   5  -7   50.35    1.86
  -3   4   6   24.61    0.98
   3  -4  -6   22.86    1.28
   3   7   6    0.45    1.20
  -3  -5   5    2.04    0.78
  -3  -5   5    2.63    0.85
   3   5  -5    3.77    1.18
  -3  -5   5    2.53    0.60
  -1   7   6   -0.04    0.79
  -1   7   6   -0.44    0.55
  -4   1   5    1.07    0.50
  -4   1   5    1.46    0.67
   4  -1  -5   -0.84    2.50
   4   2   8   60.95    2.12
   4   2   8   60.12    2.09
   3   4  10    1.24    0.70
   4   6   3    0.77    1.76
  -4  -6  -3    0.15    1.15
   2   0  11    7.15    0.83
  -1  -2 -12    3.50    2.39
   0   8   1    1.29    0.94
   0   8   1    1.13    0.85
  -1  -5 -11   46.53    3.58
   3  -2  -8   69.61    2.55
  -4  -6  -2   58.54    2.47
   4   6   2   52.24    3.34
   4   3   8    6.89    0.82
   4   3   8    7.18    0.84
   0   8   4   21.32    1.05
   0  -8  -4   17.64    1.98
   2   7  -3   21.21    2.23
  -2  -7   3   22.16    1.60
   0   7   8    6.89    0.67
   0  -7  -8    4.78    2.14
  -2   4   9    7.42    0.90
   0   6  -6   19.38    1.44
   1   6  -6    4.12    1.25
   2   8   1   13.39    1.42
   2   8   1   14.49    2.66
  -2  -8  -1   12.74    1.54
  -2   6  -3  147.83    4.12
  -3   4  -5   31.89    1.29
  -3   4  -5   31.16    1.35
   4  -3  -2   26.41    2.49
   4   5  -2   17.62    1.14
  -4  -5   2   21.85    1.39
  -4  -5   2   20.78    1.17
   0   3 -10   52.51    2.43
  -3   5  -2   49.95    1.85
   0   4  -9    4.12    1.36
  -1  -3 -12    2.44    2.46
   1   3  12    3.84    0.71
   2   8   5   44.89    1.78
  -2  -8  -5   45.64    2.89
   1   1  12   29.13    1.17
  -1  -1 -12   29.06    2.81
   2   1 -10    3.18    2.05
  -4   3  -2   19.52    0.97
   4  -3   2   19.60    1.97
   1   7  -4   17.71    1.85
  -4  -6  -1    9.12    1.24
   0  -1 -12    3.21    2.62
   2  -6  -6    0.26    0.62
  -2   6   6    0.51    0.64
  -2  -4   8    1.09    0.84
   2   4  -8    3.19    2.81
  -1  -8  -6   26.65    1.98
   1   8   6   29.75    2.13
   1   8   6   25.34    1.18
  -2   5   8   16.28    0.83
   3  -5  -4   19.26    1.19
  -1  -1  11   19.19    0.90
  -3  -2   8    2.58    0.71
   3   2  -8    3.23    1.84
   3   7  -1   38.23    1.78
   3   7  -1   36.49    1.43
   0   8   0   19.57    1.38
   4   5   7    4.46    0.94
   3  -3   7   29.71    1.50
  -4   2  -5   24.24    1.17
   0  -8  -5   -0.07    1.61
   0   8   5    1.84    0.62
   2   3  -9   99.75    5.15
  -2  -3   9  100.47    2.88
  -2  -6 -10   77.38    4.57
   2   6  10   80.16    3.04
  -4  -4  -8   93.03    3.78
   1   8  -1   -0.04    0.90
   0   3  12   30.21    1.31
   0  -5 -11    3.46    2.79
   0   6  10    2.04    0.95
   0  -6 -10   -2.15    2.44
  -2  -8   0    3.55    1.25
   2   8   0    4.92    1.15
  -2   5  -6   39.98    1.62
  -2   3  -9   16.35    0.91
   1   4  -9    3.41    2.26
   3   7   7    3.16    1.50
  -2  -5 -11   13.56    2.91
   4   4  -4    0.60    0.58
  -4  -4   4    0.60    0.67
  -4  -6   0   56.74    2.33
   4   3  -5   12.87    0.85
   4   3  -5   14.09    1.08
  -2  -8  -6    0.90    1.91
   4   0  -6    8.09    3.06
   4   0  -6   13.40    0.88
   1  -7   3    0.91    1.12
   0   0 -12   11.44    2.63
   4   1  -6    0.33    0.59
   4   1  -6   -0.14    0.50
  -1   3 -10   62.13    2.24
   1   3 -10   11.81    2.39
  -4   2   5    2.00    0.53
  -1   7   7   56.72    1.75
  -1  -4 -12    3.64    2.72
  -3   5  -3    4.44    0.73
   3   5  10   28.81    1.69
   0   8  -1    7.83    1.04
  -1   4  -9   12.72    1.10
   3  -5  -5   11.78    1.02
   3  -3  -8   34.02    1.61
   0  -8  -6   14.42    2.05
   1   8   7   12.68    0.89
   1   8   7   12.99    1.62
  -2  -7  -9   21.51    3.04
  -3   4   7   26.69    1.09
   3  -4  -7   25.05    1.36
   3   0  -9    0.83    1.32
  -3   0   9   -0.02    0.60
  -4  -5   3    7.72    1.20
   4   5  -3    7.65    0.90
   3  -1  -9   37.01    2.13
   3   7  -2   63.35    2.41
   2   2 -10   17.12    2.91
  -3  -4   7   20.85    1.24
  -5  -3  -1    6.97    1.04
   4   2  -6   69.47    2.34
  -2   6   7    0.21    0.45
  -1   6  -6   51.02    2.04
   2   8  -1    3.96    1.09
   0  -7  -9   10.04    2.57
  -4   3   4   37.47    1.34
  -4  -6   1    1.03    1.02
  -2   7   3    3.25    0.59
   2   6  -6   12.85    1.77
   3   1  -9    1.04    1.62
  -3  -1   9    1.22    0.64
  -3  -5   6   17.51    1.19
   3   5  -6   15.96    1.59
  -3  -3   8    0.12    0.78
   3   8   2    1.63    0.71
  -3   5  -4   20.23    1.07
  -4   4   0   51.74    1.80
  -5  -4  -3    2.82    1.10
  -1   8   4    6.07    0.69
  -1   7   8    6.48    0.64
  -1   1 -12    7.48    1.53
  -2   5  -7   45.71    1.71
   4   3  -6    1.07    0.79
  -3   6   2    0.26    0.53
   0   0   0    0.00    0.00

_computing_structure_solution     'SHELXT 2018/2 (Sheldrick, 2018)'
;

_shelx_hkl_checksum   52144

#==============================================================================
#     End of CIF
#==============================================================================
