# Supplementary material for: Solid State Structure and Hydrogen Bonding of Some Cyclic NH Carboximides
Source: MDPI journal article supplement (doi:10.3390/cryst13010150), 2023-01-15
Supplement: s1 [file s1 › 13.cif]

data_13
_audit_creation_date                               2020-08-25
_audit_creation_method                            'by CrystalStructure 4.3'

_publ_section_references
;
    ENTER OTHER REFERENCES

    Rigaku (2018). CrystalStructure. Version 4.3. 
    Rigaku Corporation, Tokyo, Japan.

    Sheldrick, G. M. (2014). Acta Cryst. (2014). A70, C1437.
    SHELXT Version 2018/2

    Sheldrick, G.M. (2008) SHELXL Version 2018/3, Acta Cryst. A64, 112-122.

    Rigaku Oxford Diffraction (2018), CrysAlisPro. version 1.171.40.14a.
    Rigaku Corporation, Tokyo, Japan

;


_chemical_formula_sum                             'C6 H9 N O2'
_chemical_formula_moiety                          'C6 H9 N O2'
_chemical_formula_weight                           127.14
_chemical_melting_point                            ?

#==============================================================================
# CRYSTAL DATA
_space_group_crystal_system                        monoclinic
_space_group_name_H-M_alt                         'P 1 21/c 1'
_space_group_name_Hall                            '-P 2ybc'
_space_group_IT_number                             14
loop_
_space_group_symop_id
_space_group_symop_operation_xyz
1   '+X,+Y,+Z'
2   '-X,1/2+Y,1/2-Z'
3   '-X,-Y,-Z'
4   '+X,-1/2-Y,-1/2+Z'
#------------------------------------------------------------------------------
_cell_length_a                                     10.9883(2)
_cell_length_b                                     7.18070(11)
_cell_length_c                                     8.21778(18)
_cell_angle_alpha                                  90.0000
_cell_angle_beta                                   109.066(2)
_cell_angle_gamma                                  90.0000
_cell_volume                                       612.84(2)
_cell_formula_units_Z                              4
_cell_measurement_reflns_used                      4980
_cell_measurement_theta_min                        5.71
_cell_measurement_theta_max                        67.92
_cell_measurement_temperature                      173
#------------------------------------------------------------------------------
_exptl_crystal_description                         prism
_exptl_crystal_colour                              colourless
_exptl_crystal_size_max                            0.150
_exptl_crystal_size_mid                            0.120
_exptl_crystal_size_min                            0.030
_exptl_crystal_density_diffrn                      1.378
_exptl_crystal_density_meas                        ?
_exptl_crystal_density_method                     'not measured'
_exptl_crystal_F_000                               272.00
_exptl_absorpt_coefficient_mu                      0.868
_exptl_absorpt_correction_type                     multi-scan
_exptl_absorpt_process_details
;
CrysAlisPro 1.171.40.14a (Rigaku Oxford Diffraction, 2018)
Empirical absorption correction using spherical harmonics,
 implemented in SCALE3 ABSPACK scaling algorithm.
;
_exptl_absorpt_correction_T_min                    0.831
_exptl_absorpt_correction_T_max                    0.974

#==============================================================================
# EXPERIMENTAL DATA

_diffrn_ambient_temperature                        173
_diffrn_radiation_type                            'Cu K\a'
_diffrn_radiation_wavelength                       1.54184
_diffrn_measurement_device_type                   'Rigaku XtaLAB P100'
_diffrn_measurement_method                         \w
_diffrn_detector_area_resol_mean                   5.811
_diffrn_reflns_number                              5849
_diffrn_reflns_av_unetI/netI                       0.0102
_diffrn_reflns_av_R_equivalents                    0.0174
_diffrn_reflns_theta_max                           68.071
_diffrn_reflns_theta_min                           4.257
_diffrn_reflns_theta_full                          67.684
_diffrn_measured_fraction_theta_max                0.994
_diffrn_measured_fraction_theta_full               0.996
_diffrn_reflns_Laue_measured_fraction_max          0.994
_diffrn_reflns_Laue_measured_fraction_full         0.996
_diffrn_reflns_point_group_measured_fraction_max   0.994
_diffrn_reflns_point_group_measured_fraction_full  0.996
_diffrn_reflns_limit_h_min                        -13
_diffrn_reflns_limit_h_max                         12
_diffrn_reflns_limit_k_min                        -5
_diffrn_reflns_limit_k_max                         8
_diffrn_reflns_limit_l_min                        -9
_diffrn_reflns_limit_l_max                         9
_diffrn_standards_number                           0
_diffrn_standards_interval_count                   .
_diffrn_standards_decay_%                          ?
_reflns_number_total                               1111
_reflns_number_gt                                  1100
_reflns_threshold_expression                       F^2^>2.0\s(F^2^)
_reflns_Friedel_coverage          0.000
_reflns_Friedel_fraction_max      .
_reflns_Friedel_fraction_full     .

#==============================================================================
# REFINEMENT DATA

_refine_special_details
;
    Refinement was performed using all reflections. The weighted 
    R-factor (wR) and goodness of fit (S) are based on F^2^.
    R-factor (gt) are based on F. The threshold expression of
    F^2^ > 2.0 sigma(F^2^) is used only for calculating R-factor (gt).
;
_refine_ls_structure_factor_coef                   Fsqd
_refine_ls_R_factor_all                            0.0666
_refine_ls_R_factor_gt                             0.0664
_refine_ls_wR_factor_ref                           0.1433
_refine_ls_wR_factor_gt                            0.1431
_refine_ls_number_restraints                       1
_refine_ls_hydrogen_treatment                      mixed
_refine_ls_number_reflns                           1111
_refine_ls_number_parameters                       87
_refine_ls_goodness_of_fit_ref                     1.273
_refine_ls_weighting_scheme                        calc
_refine_ls_weighting_details
           'w = 1/[\s^2^(Fo^2^)+(0.0888P)^2^+0.1118P] where P=(Fo^2^+2Fc^2^)/3'
_atom_sites_solution_hydrogens                     geom
_atom_sites_solution_primary                       direct
_atom_sites_solution_secondary                     difmap
_refine_ls_shift/su_max                            0.000
_refine_diff_density_max                           0.40
_refine_diff_density_min                          -0.65
_refine_ls_extinction_method                       SHELXL
_refine_ls_extinction_coef                         0.277(18)

loop_
_atom_type_symbol
_atom_type_description
_atom_type_scat_dispersion_real
_atom_type_scat_dispersion_imag
_atom_type_scat_source
  'C' 'C'  0.0181 0.0091 
;
International Tables for Crystallography
(Vol. C, Tables 4.2.6.8 and 6.1.1.4)
;
  'H' 'H'  0.0000 0.0000 
;
International Tables for Crystallography
(Vol. C, Table 6.1.1.4)
;
  'N' 'N'  0.0311 0.0180 
;
International Tables for Crystallography
(Vol. C, Tables 4.2.6.8 and 6.1.1.4)
;
  'O' 'O'  0.0492 0.0322 
;
International Tables for Crystallography
(Vol. C, Tables 4.2.6.8 and 6.1.1.4)
;

#==============================================================================
# ATOMIC COORDINATES AND THERMAL PARAMETERS

loop_
 _atom_site_label
 _atom_site_type_symbol
 _atom_site_fract_x
 _atom_site_fract_y
 _atom_site_fract_z
 _atom_site_U_iso_or_equiv
 _atom_site_adp_type
 _atom_site_occupancy
 _atom_site_site_symmetry_order  
 _atom_site_calc_flag
 _atom_site_refinement_flags_posn
 _atom_site_refinement_flags_adp
 _atom_site_refinement_flags_occupancy
 _atom_site_disorder_assembly
 _atom_site_disorder_group
O2 O 0.76285(11) 0.91108(15) 0.63596(15) 0.0362(4) Uani 1 1 d . . . . .
O7 O 0.49647(10) 0.48137(14) 0.71690(15) 0.0338(4) Uani 1 1 d . . . . .
N1 N 0.64272(11) 0.67862(15) 0.68262(15) 0.0256(4) Uani 1 1 d D . . . .
C2 C 0.74365(13) 0.74441(18) 0.63151(16) 0.0255(5) Uani 1 1 d . . . . .
C3 C 0.82313(14) 0.6088(2) 0.56948(18) 0.0300(5) Uani 1 1 d . . . . .
H3A H 0.882778 0.680212 0.525250 0.036 Uiso 1 1 calc R U . . .
H3B H 0.764912 0.537465 0.471866 0.036 Uiso 1 1 calc R U . . .
C4 C 0.90191(14) 0.4710(2) 0.7047(2) 0.0352(5) Uani 1 1 d . . . . .
H4A H 0.967988 0.541086 0.795156 0.042 Uiso 1 1 calc R U . . .
H4B H 0.947483 0.385651 0.649573 0.042 Uiso 1 1 calc R U . . .
C5 C 0.82316(14) 0.3545(2) 0.79040(19) 0.0315(5) Uani 1 1 d . . . . .
H5A H 0.828704 0.412737 0.901795 0.038 Uiso 1 1 calc R U . . .
H5B H 0.862014 0.228927 0.815080 0.038 Uiso 1 1 calc R U . . .
C6 C 0.68077(14) 0.33398(19) 0.6819(2) 0.0294(5) Uani 1 1 d . . . . .
H6A H 0.674356 0.315034 0.560001 0.035 Uiso 1 1 calc R U . . .
H6B H 0.645569 0.221613 0.720260 0.035 Uiso 1 1 calc R U . . .
C7 C 0.60003(14) 0.49929(18) 0.69333(18) 0.0250(4) Uani 1 1 d . . . . .
H1 H 0.5904(16) 0.7729(19) 0.714(2) 0.034(4) Uiso 1 1 d D . . . .

loop_
 _atom_site_aniso_label
 _atom_site_aniso_U_11
 _atom_site_aniso_U_22
 _atom_site_aniso_U_33
 _atom_site_aniso_U_23
 _atom_site_aniso_U_13
 _atom_site_aniso_U_12
O2 0.0400(7) 0.0230(7) 0.0510(8) 0.0005(4) 0.0223(5) -0.0049(4)
O7 0.0281(7) 0.0255(6) 0.0533(8) 0.0006(4) 0.0208(5) -0.0011(4)
N1 0.0249(7) 0.0193(7) 0.0352(7) -0.0012(4) 0.0132(5) 0.0008(4)
C2 0.0244(8) 0.0243(8) 0.0281(8) 0.0015(5) 0.0089(6) -0.0019(5)
C3 0.0287(8) 0.0298(8) 0.0366(8) 0.0007(6) 0.0174(6) -0.0001(6)
C4 0.0248(8) 0.0338(9) 0.0473(9) 0.0030(6) 0.0123(7) 0.0031(6)
C5 0.0291(8) 0.0283(8) 0.0375(8) 0.0048(6) 0.0114(6) 0.0069(6)
C6 0.0289(9) 0.0201(8) 0.0420(9) -0.0012(5) 0.0155(6) 0.0007(5)
C7 0.0238(7) 0.0214(8) 0.0297(8) -0.0002(5) 0.0086(6) -0.0019(5)

#==============================================================================
_computing_data_collection
                                   'CrysAlisPro 1.171.40.14a (Rigaku OD, 2018)'
_computing_cell_refinement
                                   'CrysAlisPro 1.171.40.14a (Rigaku OD, 2018)'
_computing_data_reduction
                                   'CrysAlisPro 1.171.40.14a (Rigaku OD, 2018)'
_computing_structure_solution
                                      'SHELXT Version 2018/2 (Sheldrick, 2014)'
_computing_structure_refinement
                                      'SHELXL Version 2018/3 (Sheldrick, 2008)'
_computing_publication_material
                                          'CrystalStructure 4.3 (Rigaku, 2018)'
_computing_molecular_graphics                     'CrystalStructure 4.3'

#==============================================================================
# MOLECULAR GEOMETRY

_geom_special_details
;
 All esds (except the esd in the dihedral angle between two l.s. planes)
 are estimated using the full covariance matrix.  The cell esds are taken
 into account individually in the estimation of esds in distances, angles
 and torsion angles; correlations between esds in cell parameters are only
 used when they are defined by crystal symmetry.  An approximate (isotropic)
 treatment of cell esds is used for estimating esds involving l.s. planes.
;

loop_
 _geom_bond_atom_site_label_1
 _geom_bond_atom_site_label_2
 _geom_bond_distance
 _geom_bond_site_symmetry_2
 _geom_bond_publ_flag
O2 C2 1.2137(18) . ?
O7 C7 1.2219(19) . ?
N1 C7 1.3831(17) . ?
N1 C2 1.3907(18) . ?
N1 H1 0.975(5) . ?
C2 C3 1.5037(19) . ?
C3 C4 1.528(2) . ?
C3 H3A 0.9900 . ?
C3 H3B 0.9900 . ?
C4 C5 1.530(2) . ?
C4 H4A 0.9900 . ?
C4 H4B 0.9900 . ?
C5 C6 1.534(2) . ?
C5 H5A 0.9900 . ?
C5 H5B 0.9900 . ?
C6 C7 1.5033(19) . ?
C6 H6A 0.9900 . ?
C6 H6B 0.9900 . ?

loop_
 _geom_angle_atom_site_label_1
 _geom_angle_atom_site_label_2
 _geom_angle_atom_site_label_3
 _geom_angle
 _geom_angle_site_symmetry_1
 _geom_angle_site_symmetry_3
 _geom_angle_publ_flag
C7 N1 C2 131.00(12) . . ?
C7 N1 H1 112.8(11) . . ?
C2 N1 H1 116.2(11) . . ?
O2 C2 N1 118.28(12) . . ?
O2 C2 C3 122.29(12) . . ?
N1 C2 C3 119.42(12) . . ?
C2 C3 C4 115.25(12) . . ?
C2 C3 H3A 108.5 . . ?
C4 C3 H3A 108.5 . . ?
C2 C3 H3B 108.5 . . ?
C4 C3 H3B 108.5 . . ?
H3A C3 H3B 107.5 . . ?
C3 C4 C5 114.67(12) . . ?
C3 C4 H4A 108.6 . . ?
C5 C4 H4A 108.6 . . ?
C3 C4 H4B 108.6 . . ?
C5 C4 H4B 108.6 . . ?
H4A C4 H4B 107.6 . . ?
C4 C5 C6 114.06(12) . . ?
C4 C5 H5A 108.7 . . ?
C6 C5 H5A 108.7 . . ?
C4 C5 H5B 108.7 . . ?
C6 C5 H5B 108.7 . . ?
H5A C5 H5B 107.6 . . ?
C7 C6 C5 113.48(12) . . ?
C7 C6 H6A 108.9 . . ?
C5 C6 H6A 108.9 . . ?
C7 C6 H6B 108.9 . . ?
C5 C6 H6B 108.9 . . ?
H6A C6 H6B 107.7 . . ?
O7 C7 N1 117.45(12) . . ?
O7 C7 C6 121.74(12) . . ?
N1 C7 C6 120.78(12) . . ?

loop_
 _geom_torsion_atom_site_label_1
 _geom_torsion_atom_site_label_2
 _geom_torsion_atom_site_label_3
 _geom_torsion_atom_site_label_4
 _geom_torsion
 _geom_torsion_site_symmetry_1
 _geom_torsion_site_symmetry_2
 _geom_torsion_site_symmetry_3
 _geom_torsion_site_symmetry_4
 _geom_torsion_publ_flag
C7 N1 C2 O2 -178.94(13) . . . . ?
C7 N1 C2 C3 2.3(2) . . . . ?
O2 C2 C3 C4 116.17(15) . . . . ?
N1 C2 C3 C4 -65.16(17) . . . . ?
C2 C3 C4 C5 56.11(18) . . . . ?
C3 C4 C5 C6 23.91(19) . . . . ?
C4 C5 C6 C7 -81.00(16) . . . . ?
C2 N1 C7 O7 -168.86(13) . . . . ?
C2 N1 C7 C6 13.0(2) . . . . ?
C5 C6 C7 O7 -133.21(14) . . . . ?
C5 C6 C7 N1 44.81(18) . . . . ?

loop_
_geom_hbond_atom_site_label_D
_geom_hbond_atom_site_label_H
_geom_hbond_atom_site_label_A
_geom_hbond_site_symmetry_D
_geom_hbond_site_symmetry_H
_geom_hbond_site_symmetry_A
_geom_hbond_distance_DA
_geom_hbond_distance_DH
_geom_hbond_distance_HA
_geom_hbond_angle_DHA
_geom_hbond_publ_flag
N1 H1 O7 . . 2_656 2.9278(17) 0.975(17) 1.957(17) 173.1(14) no

#==============================================================================
# Additional structures and associated data_? identifiers
# should be added at this point if there is more than one 
# structure analysis in the CIF.

_shelx_res_file
;
TITL DSAA18
    shelxl.res
    created by SHELXL-2018/3 at 22:57:44 on 25-Aug-2020
CELL  1.54184 10.98830 7.18070 8.21778 90.00000 109.06600 90.00000
ZERR  4 0.00020 0.00011 0.00018 0.00000 0.00200 0.00000
LATT 1
SYMM    -X, .50+Y, .50-Z
SFAC C H N O
UNIT 24 36 4 8
L.S. 20
FMAP 2
PLAN 5
WPDB -2
HTAB
BOND $H
CONF
LIST 4
TEMP -100.0
ACTA
SIZE 0.150 0.120 0.030
DFIX 0.9800 0.0050 N1 H1
WGHT    0.088800    0.111800
EXTI    0.276640
FVAR       7.14379
O2    4    0.762848    0.911080    0.635964    11.00000    0.04004    0.02298 =
         0.05097    0.00045    0.02229   -0.00490
O7    4    0.496468    0.481372    0.716903    11.00000    0.02808    0.02551 =
         0.05326    0.00055    0.02083   -0.00111
N1    3    0.642721    0.678621    0.682623    11.00000    0.02491    0.01934 =
         0.03517   -0.00118    0.01322    0.00076
C2    1    0.743653    0.744415    0.631506    11.00000    0.02444    0.02428 =
         0.02812    0.00153    0.00888   -0.00191
C3    1    0.823131    0.608828    0.569484    11.00000    0.02871    0.02983 =
         0.03655    0.00069    0.01744   -0.00015
AFIX  23
H3A   2    0.882778    0.680212    0.525250    11.00000   -1.20000
H3B   2    0.764912    0.537465    0.471866    11.00000   -1.20000
AFIX   0
C4    1    0.901914    0.470994    0.704739    11.00000    0.02478    0.03383 =
         0.04733    0.00298    0.01233    0.00306
AFIX  23
H4A   2    0.967988    0.541086    0.795156    11.00000   -1.20000
H4B   2    0.947483    0.385651    0.649573    11.00000   -1.20000
AFIX   0
C5    1    0.823158    0.354513    0.790396    11.00000    0.02914    0.02832 =
         0.03746    0.00476    0.01139    0.00689
AFIX  23
H5A   2    0.828704    0.412737    0.901795    11.00000   -1.20000
H5B   2    0.862014    0.228927    0.815080    11.00000   -1.20000
AFIX   0
C6    1    0.680775    0.333983    0.681856    11.00000    0.02893    0.02007 =
         0.04199   -0.00119    0.01554    0.00070
AFIX  23
H6A   2    0.674356    0.315034    0.560001    11.00000   -1.20000
H6B   2    0.645569    0.221613    0.720260    11.00000   -1.20000
AFIX   0
C7    1    0.600029    0.499289    0.693330    11.00000    0.02384    0.02145 =
         0.02969   -0.00015    0.00861   -0.00187
H1    2    0.590365    0.772858    0.713860    11.00000    0.03351
HKLF 4


REM  DSAA18
REM wR2 = 0.1433, GooF = S = 1.273, Restrained GooF = 1.273 for all data
REM R1 = 0.0664 for 1100 Fo > 4sig(Fo) and 0.0666 for all 1111 data
REM 87 parameters refined using 1 restraints

END

WGHT      0.0880      0.1146

REM Instructions for potential hydrogen bonds
EQIV $1 -x+1, y-1/2, -z+3/2
HTAB C6 O7_$1
EQIV $2 -x+1, y+1/2, -z+3/2
HTAB N1 O7_$2

REM Highest difference peak  0.398,  deepest hole -0.647,  1-sigma level  0.147
Q1    1   0.5584  0.7464  0.9343  11.00000  0.05    0.40
Q2    1   0.4832  0.7636  0.5069  11.00000  0.05    0.39
Q3    1   0.7070  0.4817  0.3525  11.00000  0.05    0.34
Q4    1   0.8205  0.9870  0.7984  11.00000  0.05    0.34
Q5    1   0.6720  0.6395  0.9040  11.00000  0.05    0.30
;

_shelx_res_checksum    5557

_shelx_hkl_file
;
   1   0   010187.70   18.22
   0   0   1   42.43    1.07
   1   0  -1    0.50    0.49
  -1   0   1    0.78    0.61
   1   0  -1    1.17    0.43
   0  -1   0    1.35    1.19
   0  -1   0    0.90    0.31
   1   1   015948.70   29.47
   1  -1   016852.80   29.40
   1   0   1    6.34    0.84
   0  -1   113709.90   24.59
   0   1   114011.70   26.78
  -1   1   119190.50   33.85
   1  -1  -119042.70   40.99
   2   0  -1    0.33    0.96
   1  -1   117682.50   34.38
   1   1   116633.20   35.02
   2  -1   0 6696.45   17.25
   2   1   0 6798.35   15.44
   2   1  -1 6282.59   17.21
   2   1  -1 6227.28   13.50
   1   0  -235499.30   60.98
  -1   0   241597.00   63.25
   0   0   254354.70   88.26
   2   0   1    0.49    1.17
   2   0  -2 1235.93    6.92
   2   0  -2 1250.40    6.35
   3   0  -1    1.03    1.22
   0  -2   023436.20   47.07
   0  -2   020386.50   33.34
  -1  -1   218383.20   34.00
   1  -1  -218244.80   41.22
   3   0   029871.60   54.29
   0   1   225717.40   47.33
   0  -1   224277.20   45.44
   1   2   0 2206.16    5.30
   1  -2   0 2440.70    8.30
   1   2   0 2251.92    9.81
   1  -2   0 2505.96   13.71
   2  -1   1 7531.34   21.67
   2   1   1 6121.17   18.14
   2  -1  -2 4830.42   18.00
   2  -1  -2 4840.70   16.28
   1   0   252560.40   87.79
   0  -2  -129553.60   59.90
   0   2   128652.30   46.83
   3  -1  -128226.50   50.97
   3   1  -126819.30   50.85
  -1   2   1  897.46    5.27
   1  -2  -1  931.32    5.73
   3   0  -2 9967.31   24.55
   3   1   014371.50   30.64
   3  -1   014103.10   32.36
   1   1   2 5831.51   19.40
   1  -1   2 6783.05   20.01
   1   2   1 4925.08   14.10
   1  -2   1 4899.74   17.46
   2  -2   029634.70   60.94
   2   2   028381.00   59.27
   2  -2  -129024.20   53.13
   2  -2  -129593.50   58.99
   3  -1  -218292.00   43.39
   3  -1  -218831.30   39.86
   3   1  -219081.60   36.18
   3   1  -217987.40   40.49
   3   0   1   20.64    1.64
   4   0  -1    0.15    1.21
  -1   0   3    2.35    1.46
   1   0  -3    2.14    0.63
   2   0   221303.50   46.94
  -1   2   213648.00   31.38
  -1  -2   212805.50   29.38
  -1  -2   213356.90   24.50
   1  -2  -213036.90   39.94
   2   0  -3    1.33    0.64
  -2   0   3   55.51    2.04
   3   1   145559.90   73.43
   3  -1   139297.60   79.73
   0  -2   220136.50   39.75
   0   2   219780.80   42.29
   0  -2  -219590.40   52.26
   0  -2   220104.40   38.39
   2   2   1 1588.91    9.31
   2   2   1 1579.62    8.51
   4   0   0  218.47    3.70
   2  -2  -247921.40   87.38
   2   2  -246878.80   88.68
   0   0   3    0.70    1.45
   4   0  -2 1052.99    8.08
   4   1  -117187.40   36.70
   3  -2  -135668.30   65.73
   3  -2  -135564.80   75.36
  -1   1   334839.30   70.90
  -1  -1   333608.90   68.32
   2   1   248925.40   87.82
   2  -1   249334.70   85.60
  -2   1   332905.70   68.97
  -2  -1   335525.60   63.67
   3   0  -3    0.10    0.77
   3   0  -3    2.54    1.41
   3   2   025937.30   59.28
   3  -2   030007.90   63.25
   4   1   0 3944.80   17.19
   4  -1   0 3372.97   15.69
   0  -1   317009.40   37.60
   0   1   316803.40   39.85
   4  -1  -2   17.81    1.80
   4   1  -2   12.71    1.51
   4  -1  -2   15.33    1.56
   4   1  -2   10.85    1.25
   4  -1  -2   21.12    2.09
   1   2   2  898.56    6.11
   1  -2   2  909.46    6.65
   0   3   0    0.27    1.27
   0  -3   0    9.78    0.48
   3   2  -2 3487.29   10.33
   3   2  -2 3560.02   16.75
  -3   1   3 3789.96   16.60
   3  -1  -3 3799.87   17.15
   1   0   3    0.85    1.54
   1   0   3   -0.05    1.32
   1  -3   0 2922.51   18.35
   1   3   0 2908.88   14.13
   1  -3   0 2924.15   10.17
  -1   3   0 3074.82   14.42
   1   3   0 3045.73   15.45
   0  -3  -1 1527.76   13.78
   0   3   1 1658.17    7.74
   0   3  -1 1629.48   11.03
   0   3   1 1638.77   10.91
   0  -3  -1 1543.80    7.83
   0   3  -1 1604.41   10.37
   0   3  -1 1594.84    9.89
   1  -3  -117474.80   35.91
   1   3  -117756.90   40.54
   1  -3  -118530.20   54.49
   1   3  -118142.20   42.67
   4   0   1   21.83    1.76
   4   0   1    9.69    1.63
   3   0   2 6624.65   25.31
   3   0   2 5915.02   22.99
   4   0  -3   -0.03    1.51
   4   0  -3    0.36    1.22
   3   2   1 2560.58   14.76
   3  -2   1 2534.25   13.15
  -1   1  -3 3649.12   16.20
   1   1   3 3243.68   15.84
   1  -1   3 3626.14   16.43
   1   1   3 3189.87   15.88
   1  -1   3 3533.79   16.30
   5   0  -1    0.40    1.51
   5   0  -1    0.65    1.31
   1   3   120729.50   45.91
  -1   3  -121098.80   47.94
   1  -3   120532.20   52.61
   1  -3   120951.80   37.96
   1   3   120690.60   50.28
   1   3   121578.40   39.95
   1   3   120275.40   46.69
   4   2  -139969.90   79.58
   4  -2  -139858.50   76.96
   2   3   0 1211.69   10.01
  -2   3   0 1236.75    9.68
   2  -3   0 1231.16    7.80
   2   3   0 1229.76    9.91
  -1  -2   314599.10   32.82
   1   2  -314672.30   38.90
  -1   2   314646.50   38.40
   2   3  -1   64.59    2.42
   2   3  -1   58.55    2.39
   2  -3  -1   57.08    3.32
   2   2   211412.40   34.83
   2  -2   211468.40   30.09
   2  -2  -3 4194.24   20.28
   2   2  -3 4298.08   15.21
  -2  -2   3 3594.22   12.50
   2   2  -3 3662.74   17.16
  -2   2   3 3589.32   16.57
   2  -2  -3 3387.49   20.00
  -2   2   3 3762.72   17.73
   2  -2  -3 3752.24   18.13
   4   1   1 4244.05   18.52
   4   1   1 4242.90   18.22
   4  -1   1 4238.22   18.70
   4   1   1 4238.82   18.29
   5   0  -2 3120.53   16.93
   5   0  -2 2671.89   14.49
   3   1   2 3054.45   15.57
   3   1   2 3089.22   15.95
   3  -1   2 3094.98   15.68
   4  -1  -336904.80   73.94
   4  -1  -336801.10   74.54
   4  -2   0 8025.82   25.75
   4  -2   0 7933.79   25.42
   0   2   3 6341.54   23.57
   0   2   3 6516.35   23.83
   0  -2   3 6315.98   20.33
   0  -2  -3 6193.11   28.57
   0   2  -3 6459.66   23.60
   5   1  -121866.20   47.86
   5  -1  -121931.30   51.35
   4  -2  -2  578.30    7.09
   4   2  -2  556.51    7.05
   4  -2  -2  531.13    7.63
   4  -2  -2  577.84    6.82
   4   2  -2  536.17    6.84
   4   2  -2  588.55    4.67
   5   0   0   99.63    2.80
   5   0   0   97.58    3.04
   5   0   0   92.92    2.96
   1   3  -214302.80   36.23
   1  -3  -212676.00   32.94
   1  -3  -213762.00   48.41
  -1  -3   213016.50   38.51
   1   3  -214000.40   39.28
   1   3  -213647.60   36.45
   2   0   3    5.12    2.03
   2   0   3    7.23    1.73
   5  -1  -2 7614.40   26.78
   5  -1  -2 7536.35   26.94
   3   2  -344427.90   95.67
   3   2  -346231.10   78.03
   3  -2  -350424.20   98.79
   3  -2  -341802.40   90.94
  -3   2   350111.70   89.26
  -3   2   349107.10   87.68
   3  -2  -348343.20   89.00
  -2   0   4  178.20    4.07
  -2   0   4  176.40    4.06
   0   3  -2 1562.76   11.36
   0   3  -2 1480.49    9.70
   0  -3   2 1562.46   10.58
   0   3  -2 1537.96   11.02
   0   3   2 1563.96    9.79
   0  -3   2 1496.52    5.83
  -1   0   4 6909.42   25.72
  -1   0   4 7206.83   26.43
   2  -3   117371.30   36.31
   2   3   117678.30   47.06
   2   3   117063.90   40.67
   2   3   117655.90   43.19
   2  -3   117224.10   46.54
  -2   3  -116800.80   42.99
   2  -3  -2 4122.85   17.71
   2  -3  -2 4070.71   17.65
   2  -3  -2 3873.34   23.90
   2   3  -2 3911.28   16.64
   2   3  -2 4151.01   19.97
  -2  -3   2 3692.49   19.12
   2   3  -2 3686.50   16.62
   3  -3  -127755.90   64.27
   3  -3  -131405.10   72.07
   3   3  -127113.20   67.55
   3   3  -134110.90   69.26
   5   1   012049.30   34.14
   5  -1   012046.00   36.17
   5   1   012198.80   36.08
   5  -1   012242.40   36.05
   3   0  -4  732.25    8.16
  -3   0   4  745.38    7.95
   2  -1   322608.10   53.82
  -2   1  -322673.10   51.02
   2  -1   322726.10   52.95
   2  -1  -4   86.00    2.72
  -2   1   4  139.09    3.45
  -2  -1   4   94.79    2.86
  -2  -1   4   94.62    2.88
  -2   1   4  123.17    3.49
   3  -3   0 9887.63   28.27
   3   3   010368.50   34.64
   3  -3   0 9824.94   36.24
   3   3   010348.60   21.33
   3   3   010345.30   33.52
  -3   3   010083.20   32.09
   3   3   010245.50   30.75
   3  -3   0 9888.80   28.42
   5   0  -3    8.59    1.67
   5   0  -3    8.47    1.48
   1  -2   3  858.88    7.73
   1   2   3  866.63    8.92
   1  -2   3  858.32    7.73
  -1   2  -3  847.53    8.53
  -1  -1   412971.40   35.77
  -1  -1   411831.60   33.38
   1  -1  -413273.90   36.97
  -1   1   414648.70   40.79
  -1   1   414045.70   40.65
   0   0   4 1669.91   12.36
   0   0   4 1720.97   12.37
   1   3   2 1119.80   10.61
   1  -3   2 1122.13    9.12
  -1   3  -2 1160.39   10.04
   1   3   2 1137.06    8.86
   1   3   2 1182.93    8.86
   1   3   2 1164.26    8.19
  -1   3  -2 1195.32    8.86
   1  -3   2 1144.66    7.24
   3   1  -410143.20   31.08
   3  -1  -4 9985.30   33.64
  -3  -1   410238.30   30.13
  -3   1   4 9941.10   32.60
  -3  -1   4 9952.35   29.44
   3  -1  -410140.60   31.18
   3  -1  -4 9825.99   33.81
   3   1  -410136.20   30.87
  -3   1   4 9957.64   32.46
   4   2   1  430.98    5.65
  -4   2  -1  456.12    5.82
   4  -2   1  437.06    6.12
   4   2   1  443.43    5.83
   4   2   1  448.45    6.82
   3   3  -2 4830.23   18.55
   3  -3  -2 5043.27   21.01
   3   3  -2 4881.32   23.00
   3   3  -2 4969.11   20.92
   3  -3  -2 4990.12   20.49
   3   3  -2 4907.66   24.48
   3  -2   237114.60   74.03
  -3   2  -236399.90   74.25
   3  -2   237458.50   74.32
   3   2   236674.60   78.62
   3   2   237004.90   74.70
   4  -2  -3   46.93    2.51
   4  -2  -3   42.91    2.88
   4   2  -3   42.69    2.43
   4   2  -3   43.58    1.55
   5   1  -333026.00   65.57
   5   1  -333447.30   65.58
   5  -1  -333337.40   71.06
   5   1  -333287.80   69.64
   5  -1  -333007.40   71.46
   4   0   2 9732.98   32.34
   4   0   2 9946.25   32.73
  -4   0   4 6149.89   23.32
  -4   0   4 6176.35   24.12
   0   1   4 1114.12   10.89
   0   1  -4 1011.46    9.27
   0  -1   4 1068.72    9.72
   0   1   4 1048.04   10.25
   0  -1   4 1045.15    9.34
   0  -1  -4  979.62    9.66
   5  -2  -1 5256.79   22.90
   5   2  -1 5311.89   24.36
   5  -2  -1 5318.89   23.02
   5   0   1    0.28    1.60
   5   0   1   -0.21    1.50
   5  -2  -210989.60   35.78
   5  -2  -210546.10   34.73
   5   2  -210490.50   35.69
   5  -2  -210633.00   40.08
   5   2  -210524.80   36.56
   5   2  -210993.50   27.65
   4   1   2 7870.92   29.87
  -4   1  -2 8050.84   25.14
   4  -1   2 7793.45   29.27
   4  -1   2 7850.15   29.66
   4   1   2 8105.61   28.59
   3  -3   1 1183.99   11.10
  -3   3  -1 1247.43   10.68
   3   3   1 1210.15   11.81
   3   3   1 1208.72   10.25
   3  -3   1 1212.74    9.36
   3   3   1 1195.84    8.16
   3  -3   1 1226.20    9.32
   6   0  -1    0.40    1.55
   6   0  -1    0.09    1.48
   6   0  -229500.90   65.67
   6   0  -229652.80   66.62
   4   1  -4 5982.19   22.51
   4  -1  -4 6056.46   24.63
   4  -1  -4 5574.62   24.04
   4   1  -4 5878.14   22.49
   4   1  -4 6262.57   24.17
  -4   1   4 5477.83   23.87
  -4   1   4 5401.72   23.24
   3   0   3    5.10    1.87
   3   0   3   24.45    2.34
   1   0   424214.50   59.71
   1   0   423970.60   59.27
   4  -3  -1 5942.90   23.79
   4  -3  -1 6008.37   30.25
   4   3  -1 6050.06   25.00
   4   3  -1 6134.37   26.80
   4  -3  -1 6092.96   24.33
   4   3  -1 5969.60   26.76
   5  -1   126836.10   61.62
   5   1   126260.50   61.05
  -5   1  -127007.00   53.54
   5   1   126911.00   61.32
   5   1   126418.20   61.72
   5  -1   126567.00   61.21
   1   3  -3  113.64    1.71
  -1  -3   3  163.69    2.07
  -1   3   3  218.01    4.94
  -1   3   3  170.40    4.00
   1  -3  -3  157.28    3.92
   1  -3  -3  159.27    3.87
  -1  -3   3  125.41    1.93
   1  -3  -3  164.10    5.69
   1   3  -3  170.37    4.39
   1   3  -3  160.14    4.10
   5  -2   0 1999.65   13.77
   5  -2   0 2110.40   14.29
  -5   2   0 2078.77   13.26
   5   2   0 2012.50   12.13
   0   4   0 2383.71   13.83
   0  -4   0 2378.22   20.27
   2   3   219007.70   45.34
   2   3   218617.60   52.95
  -2   3  -218975.80   44.12
   2   3   218830.00   46.04
  -2   3  -218782.60   49.82
   2   3   218549.10   43.79
   2  -3  -3 5708.96   30.94
  -2   3   3 5850.69   23.27
   2   3  -3 5783.48   23.88
   2   3  -3 6028.46   25.81
   2  -3  -3 5754.83   23.45
   2  -3  -3 6020.67   24.36
  -2   3   3 6138.19   24.39
   2  -2   3 1278.89   10.46
   2  -2   3 1383.94   10.98
  -2   2  -3 1347.55   11.17
   2   2   3 1309.86   11.24
   2   2   3 1241.59   11.19
   2   2  -417165.10   45.44
   2  -2  -416432.00   48.35
  -2   2   416909.00   46.47
   2  -2  -416569.60   47.37
   2   2  -417209.00   45.40
   2  -2  -416193.20   50.19
  -2   2   416301.70   46.81
  -2  -2   416944.10   39.48
   1   4   021196.60   52.97
   1  -4   020918.20   63.94
  -1   4   020997.80   50.97
   1   4   021171.00   52.79
   1   4   020880.30   47.10
   1  -4   020988.10   36.54
   1   4   021121.10   52.23
  -1   4   020665.50   54.14
  -1  -4   020633.20   65.90
  -1   2   4 2263.03   15.55
  -1   2   4 2277.52   15.73
   1   2  -4 2288.54   13.88
   1   2  -4 2284.13   15.59
  -1  -2   4 2274.52   13.02
   6   1  -1 2022.81   14.69
   6  -1  -1 2020.76   14.26
   6   1  -1 2061.02   13.24
   6   1  -1 2050.25   13.16
   6   1  -210181.00   31.58
   6   1  -210151.90   31.48
   6  -1  -210072.70   34.88
   4  -3   0 7670.22   27.09
   4  -3   0 7577.52   26.88
   4  -3   0 7906.61   34.15
   4   3   0 7837.55   21.43
   4   3   0 7621.08   30.42
  -4   3   0 7899.88   29.38
   4   3   0 7941.79   27.24
   4   3   0 7692.51   31.44
   0   3   3 2593.17   15.03
   0  -3   3 2711.47   11.75
   0   3  -3 2709.89   16.85
   0   3  -3 2537.95   15.53
   0   3  -3 2655.89   12.90
   0   3   3 2568.37   14.08
   0  -3  -3 2554.80   20.79
   4   3  -2   16.57    1.97
   4  -3  -2   14.40    1.68
   4   3  -2   16.42    2.28
   4  -3  -2   15.09    1.65
   4  -3  -2   17.68    2.40
   4   3  -2   18.84    2.05
  -3   1  -3 7007.36   25.00
   3   1   3 7014.08   28.67
   3   1   3 7077.80   25.75
   3  -1   3 7081.52   28.47
   1  -1   424582.80   57.98
   1  -1   424601.30   58.21
   1   1   424690.20   61.23
   0   4   120173.50   44.04
   0   4   120101.80   50.14
   0  -4   120010.10   57.80
   0   4  -120033.40   48.47
   1  -4  -1   10.16    2.84
   1   4  -1   12.33    1.56
   1   4  -1   10.76    1.49
  -1  -4   1    8.23    2.04
   1   4  -1   14.26    1.84
  -1   4   1    8.77    1.52
   1   4  -1   10.81    1.85
  -3   2   4 1943.26   14.34
   3  -2  -4 1948.88   14.64
   3   2  -4 1928.87   11.08
  -3   2   4 1948.65   14.39
   6   0   0 6573.30   26.92
   6   0   0 6474.50   25.17
   3   3  -355430.00  105.95
   3   3  -355133.00  114.55
   3  -3  -355252.80  108.74
   5   0  -4 7309.89   28.49
   5   0  -4 7422.50   28.24
   5   2  -315428.50   46.46
   5  -2  -315099.50   44.86
   5  -2  -315435.10   45.17
   5   2  -315731.50   46.37
   5  -2  -314847.40   48.15
   6   0  -3    1.29    1.56
   6   0  -3    0.73    1.46
   0   2  -410355.80   35.35
   0  -2   410130.90   31.27
   0   2   410273.40   36.04
   0  -2  -410374.50   41.24
   0   2  -410217.10   30.69
   0  -2   410047.60   31.45
   0   2   4 9941.54   35.17
  -1  -4  -1 8019.38   18.74
  -1  -4  -1 7843.41   38.34
  -1   4  -1 8906.16   31.77
   1   4   1 8847.51   31.12
   1   4   1 8864.97   25.57
   1   4   1 8937.05   32.95
  -1   4  -1 8488.15   30.15
  -2   4   041922.50   86.36
   2   4   041459.90   85.35
  -2  -4   041606.10  103.85
   2   4   042134.80   87.82
   2   4   042382.20   89.09
   2   4   042074.30   84.86
   2  -4   041768.30   72.27
   2   4  -1  324.90    5.74
   2   4  -1  335.73    4.97
   2   4  -1  318.26    5.66
   2  -4  -1  321.77    4.52
   6   1   0 7249.59   28.86
   6   1   0 7270.71   27.59
   6  -1   0 7373.75   29.26
   6  -1   0 7395.17   29.41
  -6   1   0 7379.50   24.00
   6  -1   0 7322.99   25.36
   5  -1  -421060.80   39.95
   5  -1  -421102.00   55.75
   5   1  -422051.10   52.78
   5   1  -421323.60   51.22
   5   1  -421314.10   52.64
   5  -1  -420399.70   54.84
   6  -1  -3  495.49    7.43
   6  -1  -3  480.16    7.31
   6   1  -3  484.08    6.61
   4  -2   214479.00   42.82
   4   2   214392.50   42.12
   4  -2   214390.40   42.67
   4   2   214486.20   45.14
   1   3   3  454.74    5.43
   1   3   3  444.57    4.14
  -1   3  -3  532.54    7.82
   1  -3   3  484.74    5.62
  -1  -3  -3  465.29    9.54
  -1   3  -3  483.80    5.25
   1   3   3  519.09    7.19
   1  -3   3  501.78    5.85
   1   3   3  491.11    6.98
   4  -2  -4  331.38    6.15
   4   2  -4  354.16    4.88
   4  -2  -4  347.13    6.88
   4  -2  -4  321.21    6.12
   4   2  -4  324.20    4.49
  -5   2  -120401.00   50.36
   5   2   119946.70   56.00
   5   2   120523.70   51.89
   5  -2   120032.80   52.11
   5  -2   119778.30   53.19
   2   0   493142.10  158.17
   2   0   490558.80  166.99
   1  -4  -2 7704.74   25.33
   1   4  -2 7415.56   30.55
   1  -4  -2 7851.41   42.60
  -1  -4   2 7180.05   31.30
   1   4  -2 7658.40   28.59
   1   4  -2 7514.91   28.52
   1  -4  -2 7336.67   24.88
  -2   0   5    2.08    1.64
  -2   0   5    0.67    1.77
   4   3   1   91.29    2.45
  -4   3  -1  105.86    3.56
   4   3   1  111.12    4.26
   4  -3   1  110.79    3.25
   4   3   1  132.66    4.32
   4   3   1  123.09    3.27
   4  -3   1  108.57    3.30
   3   3   2 7615.02   27.58
   3   3   2 8258.79   34.47
   3  -3   2 7985.58   27.45
  -3   3  -2 8096.17   31.19
   3   3   2 7540.25   26.61
  -3   3  -2 8037.43   25.90
   3   3   2 7978.10   27.72
   3  -3   2 7830.34   27.22
   4   3  -3  745.82    9.59
   4  -3  -3  757.70    9.02
   4   3  -3  750.21    8.93
   4  -3  -3  744.22   11.13
   4  -3  -3  777.18    9.34
  -3   0   5    0.74    1.73
   3   0  -5    1.93    1.65
  -3   0   5   -0.45    1.77
   3   0  -5    0.92    1.57
   0  -4  -214338.70   35.72
   0   4  -213922.90   43.98
   0   4   214240.60   42.49
   0   4  -214435.80   40.83
   0   4   214226.60   37.01
   0   4   213986.60   34.67
   0   4  -214127.80   42.56
   0  -4  -214204.20   57.96
   0  -4  -213906.30   35.66
   5   0   213223.90   44.10
   5   0   212875.40   35.94
   6  -2  -1 1673.20   13.60
   6   2  -1 1659.62   11.31
   6   2  -1 1701.27   15.00
   6  -2  -1 1635.56   13.53
   6   2  -1 1620.26   11.09
  -2   4  -1  456.22    7.19
  -2  -4  -1  576.34   12.15
   2   4   1  618.11    9.15
   2  -4   1  478.07    4.80
   2  -4   1  465.68    8.03
   2   4   1  464.41    7.90
   2   4   1  445.34    6.52
  -2   4  -1  479.63    7.29
   6   2  -2  151.15    4.65
   6   2  -2  156.45    3.37
   6   2  -2  160.84    3.45
   6  -2  -2  157.93    4.52
   6  -2  -2  150.85    4.35
   2   4  -210236.30   37.12
  -2  -4   210438.40   40.77
   2   4  -210694.50   33.27
   2   4  -210133.10   32.63
   2  -4  -210556.60   31.54
   2   4  -210298.50   33.95
   2  -4  -210346.90   31.53
   5   3  -112746.70   44.18
   5   3  -113053.50   41.18
   5  -3  -113375.70   41.15
   5  -3  -112717.90   48.59
   5  -3  -113229.80   40.52
   5   3  -113367.10   28.79
   5   3  -113119.90   44.81
   3   2   3 1205.76   11.47
   3   2   3 1229.17   11.54
   3  -2   3 1293.82   11.83
  -3   2  -3 1275.58   11.38
   3   2   3 1298.14   12.19
   3  -2   3 1306.32   11.80
  -1   0   5    1.03    1.82
  -1   0   5    0.42    1.92
  -1  -2  -4 3358.52   23.87
   1  -2   4 3483.04   18.50
   1   2   4 3718.32   21.61
  -1   2  -4 3717.13   20.71
   1  -2   4 3686.78   19.40
   1   2   4 3947.64   22.66
   3   4  -1  655.07    8.84
   3  -4  -1  647.63    7.18
   3   4  -1  637.60    8.25
   3   4  -1  656.80    6.39
   3  -4  -1  649.88    7.16
  -2   1  -4 1138.79   10.39
   2   1   4 1178.39   12.17
   2  -1   4 1148.87   12.05
  -2   1   5  238.99    5.46
  -2  -1   5  243.44    5.18
   2  -1  -5  240.49    3.89
   2   1  -5  234.92    4.52
  -2  -1   5  251.47    5.20
   5  -3  -2 4399.40   21.96
   5   3  -2 4412.43   23.60
   3  -4   0   33.34    3.03
   3   4   0   34.89    2.28
   3   4   0   33.25    2.91
   3  -4   0   31.78    1.74
   3   4   0   29.71    2.36
   3   4   0   36.92    2.69
   3  -4   0   32.13    1.78
  -3   4   0   32.28    2.45
   4   0   3    1.99    1.90
   3   1  -5 8155.39   31.50
  -3   1   5 8212.20   33.24
  -3  -1   5 7671.75   29.01
  -3  -1   5 8066.94   30.54
   3  -1  -5 8031.00   34.10
   3  -1  -5 7797.37   25.16
  -5   1  -216202.20   40.16
   5  -1   215197.20   46.96
   5   1   215043.80   47.53
   5   1   214863.30   44.61
   5   1   216009.10   50.29
   6   0   1    1.20    1.96
   6   0   1    1.33    1.29
   4   0  -5    0.54    1.51
  -4   0   5    0.29    1.64
  -4   0   5    0.64    1.70
   4   0  -5    0.78    1.76
  -1   4  -2 3434.01   18.14
  -1  -4  -2 3486.95   15.70
   1  -4   2 3498.56   20.18
   1   4   2 3494.15   15.27
  -1   4  -2 3482.30   20.29
   1   4   2 3448.71   14.72
   1   4   2 3534.53   15.18
   1   1  -532047.20   65.68
  -1  -1   532125.10   75.13
   6   0  -434450.20   72.19
   6   0  -434495.00   78.80
   5   3   0  340.25    5.58
   5   3   0  329.29    4.49
   5  -3   0  335.36    5.92
  -5   3   0  352.57    6.40
   5  -3   0  330.11    5.89
   5   3   0  327.40    6.95
   7   0  -267433.50  126.21
  -2   3  -311932.60   40.01
   2   3   311870.20   37.38
   2  -3   312152.80   35.21
   2  -3   312122.10   35.11
   2   3   310602.80   34.94
   2   3   311931.00   30.73
   2   3   310692.80   29.11
  -6   2   0 1285.53   10.85
   6   2   0 1280.73   13.02
   6   2   0 1244.46   10.68
   6  -2   0 1251.41   12.09
   3   4  -2  730.51    7.81
   3  -4  -2  725.47    8.01
   3   4  -2  806.22   10.39
   3  -4  -2  728.69    7.99
   3   4  -2  787.11    9.34
  -2   3   4  235.05    5.23
   2  -3  -4  266.25    6.01
   2  -3  -4  250.71    5.55
  -2   3   4  240.63    5.31
   2   3  -4  253.22    5.71
   2   3  -4  252.94    5.73
   5   2  -4 2603.28   17.88
   5   2  -4 2776.03   14.33
   5  -2  -4 2735.36   18.70
   5   2  -4 2849.46   14.47
   5  -2  -4 2530.54   18.43
   4  -1   3 4359.79   23.72
   4   1   3 4360.52   23.72
   7   0  -1    2.68    1.88
   7   0  -1   43.58    2.72
   0   0   5    1.44    1.87
   6   2  -3 4297.47   24.33
   6   2  -3 4289.74   18.08
   1  -3  -4  865.24   10.63
   1   3  -4  821.73    9.51
  -1   3   4  852.26    9.93
  -1   3   4  875.67   10.26
   1   3  -4  848.02   10.17
   1  -3  -4  815.61   10.11
  -6   1  -1 7549.87   24.60
   6   1   1 7049.90   29.66
   6   1   1 7274.04   29.93
   6  -1   1 6806.80   30.50
   4   1  -5 3545.93   19.08
  -4   1   5 3857.74   22.30
  -4  -1   5 3570.56   19.15
   4  -1  -5 3751.98   22.17
  -4  -1   5 3572.85   18.40
   6  -1  -4  113.31    2.70
   6   1  -4  110.37    3.43
   6  -1  -4  115.74    4.20
   6   1  -4  108.35    3.43
   6   1  -4  111.73    3.71
   3  -3  -4  328.99    7.54
   3  -3  -4  330.40    6.43
  -3   3   4  337.87    7.03
   7   1  -2 1827.59   15.74
   7   1  -2 1812.92   13.63
   7   1  -2 1849.52   13.69
   7   0  -3   20.26    2.42
   7   1  -1  758.55    9.02
   7   1  -1  752.66    9.99
   7  -1  -1  753.11    9.78
   0  -1   529297.70   71.77
   0   1   529714.60   74.04
   5   3  -3    8.80    2.06
   5  -3  -3    8.15    2.08
   3  -4   1   40.66    1.92
   3   4   1   32.44    2.94
  -3   4  -1   33.20    2.59
   3   4   1   34.21    2.39
   3  -4   1   38.54    1.92
   3   4   1   30.01    2.24
   0   3  -4 6445.84   26.58
   0   3  -4 6838.53   30.33
   0  -3   4 6542.03   22.77
   0  -3  -4 6760.39   37.88
   0   3   4 6660.72   22.95
   0   3   4 6518.91   28.78
  -4   4   1  308.11    6.37
   4  -4  -1  300.92    5.42
   4  -4  -1  302.99    5.43
   4   4  -1  311.21    6.43
   4   4  -1  312.81    6.81
   5   0  -5    3.65    1.82
   1   4  -3 5437.65   26.89
   1   4  -3 6794.87   28.88
   1   4  -3 5218.85   25.60
  -1   4   3 4503.88   21.67
   1  -4  -3 6518.11   28.45
   1  -4  -3 5108.91   22.75
  -1   4   3 4876.31   21.66
   2  -2   4  508.51    7.61
   2   2   4  487.75    8.01
  -2   2  -4  486.27    7.66
   3   0   422350.90   63.44
   2   4   216497.90   53.48
   2  -4   217128.00   50.06
  -2   4  -216592.00   50.35
   2   4   216190.50   40.02
   2   4   216890.20   46.29
  -2   4  -216666.60   45.70
   2   4   216978.40   40.22
   2   4   216751.70   46.18
   2  -4  -3 7018.60   27.78
   2  -4  -3 7170.18   29.06
   2   4  -3 6635.25   29.05
   2   4  -3 6558.28   30.47
   2   4  -3 6979.86   24.39
  -2  -2   5 8392.60   29.28
  -2  -2   5 8557.21   29.97
   2   2  -5 8468.54   32.00
  -2   2   5 8597.33   35.46
   7   1  -3 3110.22   18.20
   7   1  -3 3306.68   18.82
  -3   2   5 2106.85   16.66
   3  -2  -5 2164.12   16.39
   3   2  -5 2232.23   14.83
   3   2  -5 2160.45   14.09
  -3  -2   5 2170.06   13.68
  -3  -2   5 2115.78   13.55
   3   2  -5 2186.81   16.31
  -4   3  -2 1369.23   12.94
   4  -3   2 1336.11   11.87
   4   3   2 1335.67   11.54
   4   3   2 1363.30   14.45
   4   3   2 1356.92   11.71
   7   0   025913.90   66.08
   7   0   025525.50   62.17
   5   2   2 6408.77   30.23
  -5   2  -2 6402.58   25.94
   4  -3  -4  133.77    4.46
   4   3  -4  132.67    4.01
   4   3  -4  145.46    4.90
  -4   4   0 1511.89   13.68
   4   4   0 1512.31   15.11
   4   4   0 1508.75   12.79
   4  -4   0 1476.89   11.54
   0   4   3   91.61    3.07
   0   4   3  102.79    3.60
   0  -4  -3   92.72    3.21
   0   4   3   95.95    3.16
   0   4  -3   99.20    3.82
   0   4  -3  100.70    3.97
   0  -4  -3  103.10    3.50
   0   4  -3   92.25    2.96
   4   4  -2  183.68    5.20
   4  -4  -2  160.59    4.13
   4   4  -2  175.82    5.01
   4  -4  -2  166.29    4.30
   1  -2  -5 3579.63   22.83
  -1   2   5 3837.46   23.20
   1   2  -5 3507.40   18.17
  -1  -2   5 3842.55   20.76
  -1  -2   5 3757.70   20.08
   5   1  -515453.10   45.59
   5   1  -515518.50   45.34
  -5   3  -113805.80   43.22
   5  -3   113883.30   42.93
   5   3   113782.10   40.31
   5   3   113789.30   39.72
   1   0   5    4.07    2.30
   3   1   4 9001.53   36.73
   3  -1   4 9152.09   37.32
   3  -4  -3  464.06    7.22
   3   4  -3  447.09    8.29
   3   4  -3  442.40    7.06
   3   4  -3  468.33    6.88
  -4   2  -3 4049.40   21.16
   4   2   3 4037.42   22.98
   4  -2   3 4053.66   22.94
  -7   1   017538.20   42.43
   7  -1   017536.90   46.14
   6   3  -1 1400.68   13.03
   6  -3  -1 1400.19   13.07
   6   2   1  248.87    6.16
   6   2   1  231.49    5.33
  -6   2  -1  236.41    4.87
   6  -2   1  229.29    5.61
   6  -3  -2 1025.62   11.58
   6   3  -2 1024.78   12.36
   4   2  -5  182.38    4.14
  -4   2   5  142.13    4.86
   4   2  -5  162.60    3.92
   4  -2  -5  191.06    6.21
   4  -2  -5  205.38    5.58
   3  -3   312537.80   39.60
   3   3   312212.30   40.43
   3   3   311955.70   35.94
  -3   3  -312146.60   42.21
   3   3   311761.40   44.09
  -1   3  -4  834.62   10.81
   1  -3   4  850.89    8.76
   6   2  -4   16.85    1.58
   6   2  -4   15.05    1.57
   1  -1   5 1982.27   16.29
   1   1   5 1973.68   17.24
   7   2  -2 8492.13   38.04
   7   2  -2 8426.21   29.44
   0   5   0    0.21    2.00
   0   5   0    0.74    1.35
   7   2  -1 4481.51   21.71
   7   2  -1 4394.32   26.06
  -7   2   1 4503.65   22.39
   7   2  -1 4405.55   21.38
   7  -2  -1 4357.07   24.82
   0  -2   5 3125.62   18.69
   0   2  -5 3092.13   15.70
   7   0  -433733.40   75.15
   7   0  -433294.30   78.96
   1   4   314617.50   42.28
  -1   4  -314298.90   39.12
  -1  -4  -313824.20   43.04
   1   4   313837.40   40.78
   1   4   313634.80   40.46
  -1  -4  -314567.70   42.88
   1   5   0 7895.68   28.85
  -1   5   0 8037.23   32.00
   6   0   2   67.65    3.85
   0   5   1 8113.39   34.69
   0   5   1 8342.81   30.47
   0   5  -1 8174.60   32.82
   0   5  -1 8438.17   34.27
   5   0   3    0.09    2.21
  -1   5   130002.00   71.23
   1   5  -130281.30   73.21
   6   0  -5    1.13    1.93
   4   4   1   51.73    3.70
   4  -4   1   57.98    2.59
  -4   4  -1   58.15    3.29
   4  -4   1   59.71    2.61
   6  -3   0 2818.06   19.09
   6   3   0 2791.17   15.57
   6   3   0 2807.27   16.66
  -6   3   0 2856.90   18.54
   6   3   0 2890.70   22.09
   3   4   2 9884.43   35.98
   3   4   2 9763.95   41.33
   3  -4   210217.60   32.20
  -3   4  -2 9645.13   38.79
  -3   4  -210402.70   34.89
   5  -3  -4  663.18    9.74
   5   3  -4  670.84   10.36
   5   3  -4  656.19    9.23
   4  -4  -3 4386.17   23.30
   4   4  -3 4334.10   26.30
   7   2  -3  122.01    3.34
   7   2  -3  112.37    4.65
   7   2  -3  118.93    3.32
   6   3  -3 2555.90   20.15
   6  -3  -3 2930.67   20.22
   7  -1  -4 9744.47   38.78
   7   1  -4 9819.90   34.88
   6   1   2  114.08    4.05
   6   1   2  120.36    4.49
  -5   4   1   29.31    2.67
   5  -4  -1   26.34    2.27
   5   4  -1   30.80    3.13
   5   4  -1   28.20    2.64
  -1   5  -1 5715.21   27.95
   1   5   1 5618.76   22.43
  -1   5  -1 5619.75   27.94
   1   5   1 5685.57   27.93
   5   2  -5  420.43    6.15
   5   2  -5  440.55    6.44
   5  -1   3 2406.47   19.05
   5   1   3 2432.26   16.31
  -2   5   0   44.26    3.38
   2   5   0   42.04    3.09
  -2   5   0   42.38    2.96
   2   5   0   43.11    2.01
   2   5   0   40.67    3.02
   2   5  -1 3243.37   17.78
  -2   5   1 3637.14   23.60
  -2   5   1 3112.95   20.08
   2   5  -1 3394.08   20.85
   2   5  -1 3362.39   21.92
   2   5  -1 3436.38   20.98
   3   2   4 4989.90   27.60
  -3   2  -4 4962.37   25.23
   6  -1  -5 4085.68   24.61
   6   1  -5 4325.07   22.85
   5  -4  -2  305.66    6.22
   5   4  -2  317.75    7.08
   5   4  -2  295.53    7.00
   7   0   1   -0.35    2.10
   7   0   1    1.38    1.44
   8   0  -2  864.32   11.16
   8   0  -2  856.98   11.00
   7   2   0 3856.93   24.75
   7  -2   0 3919.53   23.67
   2   0   5    1.90    2.25
   3   0  -6 2535.32   20.52
  -3   0   6 2741.07   20.21
  -2   0   6  894.60   11.21
  -2   3  -4 2203.33   18.06
   2   3   4 2198.46   17.72
   1  -2   5   22.64    2.29
   1   2   5   24.46    3.03
   5   4   012044.60   39.73
   5   4   011932.10   47.95
   4   0   433061.60   85.11
   1   5  -2 1457.49   13.45
   1   5  -2 1453.83   13.68
  -1   5   2 1457.79   14.72
  -2   3   514903.70   48.64
   2  -3  -515103.70   50.72
   8   0  -1    1.84    1.65
   8   0  -1   -0.28    1.90
   2   4   3 2869.03   16.02
   2   4   3 2908.09   17.20
   7   1   1    2.56    1.85
   7  -1   1    3.03    2.48
   7   1   1    5.99    2.32
   2   4  -412325.10   44.94
   2   4  -412293.60   45.60
   2  -4  -412410.30   42.16
   8   0  -3    0.51    1.81
   8   1  -214218.20   45.39
   8  -1  -214175.30   48.13
   4   0  -612012.10   44.18
  -4   0   612076.40   43.63
   3   3  -529284.90   75.29
   3  -3  -528867.20   76.83
   0   5  -2   99.86    4.03
   0   5   2   93.25    3.93
   0   5  -2   93.78    4.05
   2  -1   513207.40   47.75
   2   1   512984.10   47.71
  -1   4   4 1231.91   11.95
   1   4  -4 1220.09   13.55
   1   4  -4 1198.08   12.84
   5   3   211646.70   46.63
  -5   3  -211700.00   40.77
   3  -1  -6  992.05   12.72
   3   1  -6 1005.55   11.76
   3   1  -6  900.83    9.95
  -3   1   6  936.47   11.97
  -3  -1   6 1046.43   11.52
   2   5   111066.10   40.67
   2   5   111529.40   44.22
  -2   5  -111470.30   42.84
  -2   5  -111112.60   42.60
   2   5  -2 8874.23   34.20
  -2   5   2 9010.98   35.83
   2   5  -2 9436.09   33.70
  -2   5   2 9012.68   39.57
   2   5  -2 9149.73   39.15
   2   5  -2 9365.82   36.98
  -2  -1   6  140.38    4.54
  -2   1   6  141.93    5.05
  -1   0   6  594.60    9.85
   1  -3  -5   26.40    2.93
  -1   3   5   28.80    2.97
   1   3  -5   32.37    2.44
   1   3  -5   26.47    2.79
   3   5  -1  405.42    7.78
  -3   5   1  419.41    7.79
   3   4  -4  268.07    7.03
   3  -4  -4  249.29    5.91
   4   1   4    6.76    2.15
   4  -1   4    4.02    2.41
   8   1  -1 3233.38   20.11
   8  -1  -1 3217.78   22.02
   8   1  -1 3175.16   21.16
  -8   1   1 3189.24   16.50
   8  -1  -3 4532.47   26.49
   8   1  -3 4534.82   28.06
  -3   5   016411.70   54.35
   3   5   016066.30   55.39
   3   5   016298.90   51.43
  -3   5   016030.20   52.69
  -4   3  -3  376.28    7.39
   4  -3   3  373.14    7.01
   4   3   3  345.57    6.89
   4   3   3  351.19    7.67
   5   4  -3 1317.93   13.87
   5   4  -3 1350.23   14.98
  -4  -1   6 8878.82   35.29
  -4   1   6 9203.22   39.53
   7  -2  -416665.60   54.82
   7   2  -416938.60   56.90
   6  -3   1 3993.08   23.68
   6   3   1 3993.86   26.54
  -6   3  -1 3914.03   22.58
   6   3   1 3897.67   20.97
   6   2   2 2373.87   19.01
   6  -2   2 2434.75   19.00
   4   3  -5 2300.68   15.86
   4  -3  -5 2376.58   19.41
   0   4  -4 2585.58   20.21
   0  -4  -4 2553.27   18.45
  -1   5  -2  508.78    8.94
  -1   5  -2  512.50    8.05
   1   5   2  505.75    8.16
  -1  -1   6  722.69   10.33
  -1   1   6  705.15   10.80
   6  -3  -4  157.01    5.00
   6   3  -4  445.44    8.36
   5   2   3 3792.73   23.78
   5   2   3 3770.89   23.26
   7  -3  -2    1.60    2.18
   7   3  -2    0.27    2.15
   6   2  -5 1269.69   10.81
   6  -2  -5 1275.97   14.24
   7   0  -5    0.14    1.80
   5   0  -617281.20   55.42
   3   5  -2 9677.53   37.53
   3   5  -2 9673.86   41.11
   7   3  -126275.40   76.57
  -7   3   126344.60   68.02
   7  -3  -126522.60   69.82
   0   3  -5 6777.79   33.59
   0   3   5 6385.89   31.90
  -4   4  -2   51.89    2.57
   4   4   2   56.53    4.04
  -4   4  -2   53.80    3.46
   8   0   010943.80   42.31
   8   0   010266.20   37.76
   4   4  -4 5426.21   25.72
   4  -4  -4 5488.20   28.41
   0   0   6 5499.50   31.14
   5  -4   1 2677.18   17.92
  -5   4  -1 2672.69   19.89
   8   0  -413586.00   47.21
   7   1  -5 5124.76   25.78
   7  -1  -5 4982.87   28.12
   5  -1  -6 4681.82   28.27
   5   1  -6 4777.01   25.12
   7  -2   1 3026.44   21.58
   7   2   1 3074.09   20.73
   7   2   1 3010.85   22.15
   8  -2  -2 9934.56   40.38
   8   2  -2 9658.90   33.82
   7  -3  -3 5713.33   30.51
   7   3  -3 5614.77   31.65
   3   5   1 2522.72   21.29
  -3   5  -1 2430.62   19.78
   2   2   5 1908.83   17.66
   2  -2   5 1937.35   16.81
   3   2  -6 1244.22   12.61
   3  -2  -6 1208.46   14.45
  -3   2   6 1227.58   14.05
   6  -4  -1  287.02    6.19
   6   4  -1  274.70    7.46
  -6   4   1  275.44    6.58
   6   4  -1  293.81    6.67
   8   1   0  473.60    8.51
   8   1   0  490.48    8.42
   6  -4  -2 1320.83   13.36
   6   4  -2 1288.26   15.24
   2   2  -6  483.97    7.86
  -2  -2   6  508.68    7.88
   2   2  -6  461.85    6.96
  -2   2   6  518.45    9.44
   2  -2  -6  493.37    9.55
   3   4   3   62.33    3.05
  -3   4  -3   56.80    3.55
   0   1   6  800.41   12.44
   0  -1   6  781.97   11.12
   1   4   4 8158.17   33.91
  -1  -4  -4 8274.17   35.15
  -4   5   1  254.71    6.53
   4   5  -1  250.08    6.79
   5   3  -5 1344.32   13.14
   5  -3  -5 1356.62   14.93
   8   1  -4 3547.74   21.22
   8  -1  -4 3500.24   23.06
  -1   5   3 8067.46   31.72
  -1   5   3 8136.92   35.57
   3   0   5    3.61    2.68
   3  -3   4  476.23    7.87
   3   3   4  498.64    8.61
  -2   5  -2 3698.34   21.70
  -2   5  -2 3579.58   23.74
   4   2   4 5840.78   31.77
   4  -2   4 5426.13   30.24
   2   5  -3 2084.57   16.84
  -2   5   3 2055.62   18.23
   8   2  -1 4217.14   26.93
   8  -2  -1 4286.21   26.09
  -8   2   1 4218.68   21.79
   8   2  -3 9478.90   42.21
   8   2  -3 9401.05   32.63
   4  -2  -6   81.38    4.93
   4   2  -6   74.09    3.14
   6   0   3    4.56    2.56
   7  -3   0 1106.59   12.91
   7   3   0 1089.14   14.32
  -4   5   0  386.75    8.06
   4   5   0  412.83    8.90
   7   0   2  139.71    5.46
   0   5   336021.40   83.68
   0   5  -336153.60   88.54
   0   5  -335939.90   81.87
   4   5  -213867.60   51.33
   4  -5  -213959.70   42.13
  -1  -2   6  480.20    7.97
  -1   2   6  480.69    9.07
   1  -3   5   25.56    2.17
   1   3   5   27.47    2.98
  -1   3  -5   25.88    2.98
   3  -1   5  500.30    9.58
   3   1   5  595.66   10.50
   6   0  -6 3077.10   21.44
  -6   4   010072.70   41.60
   6  -4   010255.60   38.57
   3   5  -3 3378.15   24.34
   3  -5  -3 3401.45   19.87
   5  -4  -4 1991.78   17.13
   5   4  -4 2020.31   19.17
   6   4  -314178.10   53.95
   6  -4  -314265.20   48.51
   6  -1   3  691.87   11.15
   6   1   3  668.82   10.64
   7  -1   2 6140.39   34.17
   7   1   2 6084.16   28.91
   1   0   6 3856.89   25.77
   6   1  -615552.00   48.70
   6  -1  -615177.00   53.96
   5   0   4 1202.70   14.73
   7   2  -5  414.95    8.80
   7  -2  -5  381.63    8.08
   5  -2  -6  281.99    7.23
   5   2  -6  273.39    6.69
   7  -3  -4   22.57    2.75
   7   3  -4   37.56    3.27
  -1   5  -3 1696.85   17.08
   1   5   3 1653.10   14.56
   8   2   0 2964.91   22.90
   8  -2   0 3004.47   21.76
   9   0  -2   63.60    3.59
   9   0  -2   64.68    3.68
  -6   3  -2  421.19    7.51
   6   3   2  428.99    9.19
   6  -3   2  423.69    8.47
   1  -1   6    3.97    2.30
   1   1   6   13.02    3.10
   0   2   6  860.01   12.68
   0  -2   6  881.23   11.55
   8   0   1    0.07    2.22
   8  -2  -4 9073.48   40.11
   8   2  -4 9356.78   42.64
  -5   3  -3 1959.07   16.40
   5   3   3 1952.86   18.22
   2   4   4   20.10    2.28
  -2   4  -4   23.83    2.96
   5  -1   4   10.33    2.72
   5   1   4   72.53    3.82
   6  -3  -5  507.26    9.48
   6   3  -5  528.06    9.13
   6   3  -5  512.88   10.04
   2   4  -5 5825.59   30.62
   2  -4  -5 5874.26   30.32
   9   0  -3    1.15    2.19
   9   0  -3    5.53    2.21
  -4   5  -1 3070.35   21.17
   4   5   1 3066.49   24.52
  -3   5  -2    3.89    2.14
  -3   5  -2    9.62    1.79
   8   0  -5    0.09    1.54
   4   5  -3   84.54    4.53
   4   5  -3   82.93    3.78
   3  -4  -5 4133.42   26.17
   3   4  -5 4000.44   25.93
  -5   4  -2 3267.32   22.50
   5   4   2 3179.59   25.12
   9  -1  -2 9883.74   40.95
   9   1  -210019.70   43.32
   5  -5  -1  933.86    9.97
   5   5  -1  902.49   11.70
   5   5  -1  924.02   13.29
  -5   5   1  942.93   12.50
   1   4  -5  117.67    4.38
  -1   4   5  124.34    4.85
   1  -4  -5  125.74    4.87
   1   4  -5  116.07    4.92
   8  -1   1  131.88    5.28
   8   1   1  118.88    4.87
   9   0  -1   -0.15    1.99
   9   0  -1    2.22    1.92
   3  -2   5  127.53    4.98
   3   2   5  135.34    5.34
   0   6   0 7948.27   36.45
   0   6   0 7738.82   39.18
   0   6   0 7333.74   31.66
   0   6   0 7353.88   35.96
   9   1  -3  741.16    9.89
   9  -1  -3  737.20   10.84
   9  -1  -3  724.12   10.93
   9   1  -3  734.11   11.43
  -5   5   2  379.16    8.19
   5  -5  -2  352.89    6.43
  -5   5   2  413.36    9.14
  -5   5   2  384.81    7.95
   5   5  -2  390.47    8.56
   5   5  -2  391.47    8.42
   5   5  -2  378.31    8.25
   5   5  -2  404.70    9.51
   5   5  -2  366.22    8.55
  -7   3  -118636.70   54.84
   7   3   118311.10   68.70
   7   3   117748.80   52.21
   7  -3   117807.30   58.41
  -7   3  -118575.40   67.20
   7   3   118619.00   63.95
   7   3   117811.50   63.05
   8   1  -512515.40   54.23
   8  -1  -512349.90   47.22
   8   1  -512632.10   49.61
   8   1  -512177.80   42.86
   8  -1  -511968.10   47.12
   8  -3  -2 1032.66   12.91
   8  -3  -2 1004.79   12.74
   8   3  -2  960.49   14.11
   8   3  -2  991.61   12.41
  -8   3   2  995.30   13.58
   8   3  -2 1057.74   14.92
  -8   3   2 1027.64   12.20
   8   3  -2 1014.94   14.28
  -4   4  -3  205.00    6.15
   4   4   3  197.72    5.15
   4   4   3  204.25    6.82
   4   4   3  210.34    6.24
  -4   4  -3  203.67    7.17
  -4   4  -3  215.93    7.34
   6   2   3 9126.31   37.61
   6  -2   3 9169.13   40.37
   6   2   3 9219.44   39.85
  -2   3  -5  144.26    5.66
   2   3   5  157.83    5.73
  -2   3  -5  155.82    5.38
  -2   3  -5  123.11    5.90
   2  -3   5  131.13    4.33
   2   3   5  145.43    5.35
  -2   3  -5  151.27    6.06
   1   6   010581.10   36.41
  -1   6   010605.50   42.76
   1   6   010756.10   42.73
   1   6   010834.50   44.41
  -1   6   010333.40   42.10
  -1   6   010812.40   41.25
  -1   6   010795.00   43.81
   1   6   010685.80   43.08
   1   6   010996.70   47.31
  -1   6   010517.60   47.25
  -3   3   6   26.28    3.00
   3   3  -6   26.88    3.20
   3   3  -6   22.87    3.56
  -3   3   6   28.38    3.08
   3   3  -6   24.31    2.49
   3  -3  -6   31.95    3.80
   6   4   1 4217.74   29.13
   6   4   1 4281.22   27.05
   6  -4   1 4139.56   24.27
  -6   4  -1 4244.48   32.16
  -6   4  -1 4170.69   25.67
   6   4   1 4184.94   29.67
   7   0  -6  995.37   13.50
   7   0  -6  973.35   12.96
   7   0  -6  988.77   14.79
   7   0  -6 1009.07   12.36
   4   4  -5  311.31    7.88
   4   4  -5  304.22    7.48
   4  -4  -5  308.26    7.36
   4   4  -5  296.65    7.75
   4   4  -5  321.99    7.96
   4   4  -5  292.94    7.90
   2   3  -6 1201.20   15.07
  -2   3   6 1170.25   13.68
   2   3  -6 1151.39   12.20
   2  -3  -6 1222.03   14.88
   2   3  -6 1167.44   13.94
  -2   3   6 1193.43   14.27
   7   2   2    0.36    3.28
   7   2   2    2.18    2.83
   7  -2   2    2.61    2.39
   7  -2   2    0.78    2.50
   7   2   2    0.97    2.04
   7   2   2    0.95    2.17
   7   2   2    2.36    2.12
   9   1  -1 2198.35   17.90
   9  -1  -1 2219.07   19.23
   9  -1  -1 2166.04   19.20
   0   6   1  124.23    4.81
   0   6   1  117.24    4.88
   0   6   1  121.67    3.86
   0   6   1  128.91    5.01
   0   6  -1  120.65    4.94
   0   6  -1   99.24    5.46
   0   6   1   99.97    5.00
   0   6  -1  124.30    5.10
   0   6   1  119.35    5.35
   0   6  -1  117.79    4.76
   0   6  -1   91.83    5.29
   0   6  -1  120.84    4.39
   0   6   1  120.84    4.97
   6   4  -4 2866.05   23.76
   6   4  -4 2697.56   22.12
   6   4  -4 2810.05   21.64
  -6   4   4 2805.98   23.21
   6  -4  -4 2780.95   21.20
   6  -4  -4 2802.67   21.14
   6   4  -4 2690.80   21.70
   6   4  -4 2909.77   24.30
  -6   4   4 2832.56   20.61
   6   4  -4 2722.49   22.49
   6   4  -4 2797.02   23.41
   1   6  -1    5.97    1.65
  -1   6   1    7.20    2.82
   1   6  -1   25.72    3.19
   1   6  -1    5.66    2.67
  -1   6   1    6.19    2.49
  -1   6   1    9.44    2.52
  -1   6   1    6.67    2.82
   1   6  -1   13.53    3.54
   1   6  -1    8.05    2.39
  -1   6   1    6.64    2.71
  -1   6   1    9.98    1.93
   1   6  -1    5.92    3.20
  -1   6   1   21.30    2.76
   6  -2  -6 2786.99   21.56
   6   2  -6 2829.95   21.77
   6  -2  -6 2844.24   22.23
   6   2  -6 2817.70   20.80
   6   2  -6 2793.60   23.65
  -6   2   6 2788.01   20.60
   5   5   0 3731.34   26.79
   5   5   0 3757.12   27.56
   5   5   0 3686.80   27.62
   5   5   0 3794.60   24.01
   5   5   0 3629.37   27.51
  -5   5   0 3706.60   25.57
  -5   5   0 3686.95   24.99
  -5   5   0 3739.00   23.87
  -5   5   0 3679.53   23.24
   5   5   0 3721.73   26.12
  -7   4   211653.50   48.98
  -7   4   211752.10   46.21
   7  -4  -211278.90   43.25
   7  -4  -211567.20   44.00
   7   4  -211436.30   45.57
   7   4  -211267.80   45.73
   7   4  -211728.00   51.81
   7   4  -211754.70   51.47
   7   4  -211707.30   49.78
  -4   3  -4 2188.77   18.14
  -4   3  -4 2273.88   19.86
   4  -3   4 2121.20   18.03
   4   3   4 2182.17   19.28
  -4   3  -4 2085.63   20.92
  -4   3  -4 2267.11   21.33
   4   3   4 2154.45   18.69
  -4   3  -4 2168.21   21.23
  -8   3   1  163.90    6.57
   8   3  -1  154.48    6.08
   8   3  -1  164.49    6.54
   8  -3  -1  154.38    5.34
   8   3  -1  158.05    6.03
   8  -3  -1  166.43    5.58
   8   3  -1  151.23    5.86
  -8   3   1  150.69    4.65
  -8   3   1  166.41    5.79
   8   3  -1  166.13    4.96
   2   5   3  812.68   10.69
  -2   5  -3  854.16   13.15
   2   5   3  825.48   11.32
  -2   5  -3  836.07   13.32
   2   5   3  831.57   13.38
  -2   5  -3  833.00   12.21
   2   5   3  858.24   11.57
  -2   5  -3  878.91   13.98
  -2   5  -3  870.08   12.22
   2   5   3  814.67    9.75
   2  -5  -4 2637.93   18.38
   2   5  -4 2650.82   20.96
   2   5  -4 2653.17   21.95
   2   5  -4 2631.62   21.69
   2   5  -4 2617.43   21.56
  -2   5   4 2629.36   20.10
  -2   5   4 2650.22   21.46
  -2   5   4 2690.48   20.15
  -2   5   4 2698.48   21.09
   2   5  -4 2703.84   21.14
   2   5  -4 2683.38   21.88
   2   5  -4 2777.01   23.50
   8   3  -3  152.38    6.15
   8  -3  -3  133.27    5.14
   8   3  -3  142.91    5.47
   8   3  -3  144.97    6.02
   8   3  -3  133.90    6.00
   8  -3  -3  136.06    5.31
  -8   3   3  153.79    6.01
   8   3  -3  130.81    5.44
  -7   4   121679.60   68.29
   7   4  -121935.70   66.83
  -7   4   121372.10   73.89
   7   4  -121292.30   70.13
   7  -4  -121659.70   62.45
   7  -4  -121953.60   62.36
   7   4  -121559.60   61.94
   7   4  -121742.20   72.09
   7   4  -121470.40   62.23
   7   4  -121840.70   72.85
   7   4  -121697.20   72.15
  -7   4   121885.70   63.97
   9   0  -4 1450.82   14.81
   9   0  -4 1442.05   16.40
   0   4   5 2217.77   18.41
   0  -4  -5 2406.74   19.82
   0   4  -5 2353.54   20.74
   0   4  -5 2237.46   19.90
   0   4  -5 2323.08   22.22
   0   4   5 2330.43   19.60
   0   4  -5 2523.63   23.51
   0   4  -5 2280.64   18.82
   4   0   5    0.89    2.56
   4   0   5    2.54    2.97
   4   3  -6   17.13    3.26
   4   3  -6   17.20    2.56
   4   3  -6   14.51    3.44
  -4   3   6   26.00    3.13
   4  -3  -6   27.75    3.25
   4   3  -6   17.68    3.01
   4   3  -6   15.12    3.17
   3   0  -7    2.43    2.18
  -3   0   7    0.48    2.08
  -3   0   7   -0.16    2.41
   1   5  -4 1459.66   15.68
   1   5  -4 1432.14   17.17
  -1   5   4 1405.73   16.16
  -1   5   4 1448.85   12.66
  -1   5   4 1407.67   13.56
   1   5  -4 1428.37   15.74
  -1   5   4 1436.38   15.17
   1   5  -4 1438.93   15.71
   1   5  -4 1470.35   16.74
   1   5  -4 1450.28   15.96
   7  -1  -6 3959.44   25.94
   7   1  -6 3857.75   26.07
   7   1  -6 4041.96   24.58
   7   1  -6 3881.57   28.58
   7  -1  -6 3870.82   25.73
   7  -1  -6 3961.56   25.72
   7  -1  -6 3850.28   26.26
   7  -1  -6 3924.94   28.48
   7   1  -6 3834.89   23.02
  -7   1   6 4146.06   25.53
   7   1  -6 4033.15   28.48
   2   0   6 6908.21   36.57
   2   0   6 6973.75   37.42
  -1   3   6  119.93    5.10
  -1   3   6  113.33    5.16
   1   3  -6  120.62    5.45
   1  -3  -6  127.58    5.53
   1   3  -6  120.49    5.03
   1   6   1  500.63    8.64
  -1   6  -1  498.28    8.76
   1   6   1  489.51    9.92
  -1   6  -1  464.21   10.01
  -1   6  -1  518.73    9.19
   1   6   1  552.94    9.66
   1   6   1  526.55    9.42
  -1   6  -1  529.96    9.40
   1   6   1  531.93    8.90
  -1   6  -1  494.88   10.42
  -1   6  -1  526.63    9.29
   1   6   1  533.52   10.34
   1   6   1  503.22    9.11
   1   2   6 2752.54   22.93
   1   2   6 2617.29   21.44
   1  -2   6 2553.78   19.94
  -1   2  -6 2570.41   21.20
   1  -2   6 2600.21   19.91
  -1   2  -6 2685.60   23.96
   1   2   6 2523.22   21.35
   4   0  -7    4.92    2.42
   4   0  -7    3.03    2.58
  -4   0   7    4.70    2.32
  -4   0   7    4.52    2.24
   4   0  -7    3.17    3.09
  -2   6   011301.50   42.09
  -2   6   011284.90   44.99
   2   6   011436.20   40.69
  -2   6   011479.30   49.46
  -2   6   011189.70   45.53
  -2   6   010813.90   43.64
  -2   6   011315.30   45.70
   2   6   011274.50   45.07
   2   6   010990.50   43.16
   2   6   011281.60   47.53
   2   6   011259.60   44.81
  -2   6   010965.10   47.11
   2   6   011355.90   43.87
   2   6   011108.40   48.93
   2   6   011393.90   45.14
   2   6  -111102.00   44.46
   2   6  -111052.80   43.41
   2   6  -110901.60   43.41
   2   6  -110796.40   39.66
  -2   6   111144.70   40.10
   2   6  -110666.00   44.03
   2   6  -111137.00   48.52
  -2   6   110465.20   41.53
  -2   6   111117.00   45.10
  -2   6   110977.70   43.92
  -2   6   110817.10   43.84
   2   6  -110680.00   47.59
   2   6  -110659.70   46.18
  -2   6   110991.40   46.52
   2   6  -110893.30   44.35
  -2   6   111359.40   47.53
   2   0  -7    0.74    2.17
   2   0  -7    2.28    2.67
  -2   0   7    0.49    2.13
  -2   0   7    0.78    2.40
  -3   5   4   49.91    3.89
  -3   5   4   33.88    3.37
   3  -5  -4   27.09    2.42
   3   5  -4   28.52    3.16
   3   5  -4   33.48    3.52
   3   5  -4   33.09    3.62
   3   5  -4   33.49    4.06
   3   5  -4   48.28    4.18
   3   5  -4   28.65    3.23
  -3   5   4   32.59    3.19
   3   5  -4   26.15    3.95
  -5   2  -4 5741.55   34.30
   5   2   4 5841.42   31.54
   5   2   4 5862.56   32.47
   5   2   4 5881.56   32.34
   5   2   4 6009.96   33.08
  -5   2  -4 5745.53   26.53
   5  -2   4 5854.29   32.02
   5  -2   4 5893.66   32.78
  -5   2  -4 5870.36   34.21
   7   4  -3 7413.77   40.98
   7   4  -3 7534.72   37.27
   7   4  -3 7243.45   35.96
   7   4  -3 7454.84   34.23
   7   4  -3 7363.43   38.22
   7   4  -3 7653.50   38.84
  -7   4   3 7429.44   39.00
   7  -4  -3 7447.41   35.27
  -7   4   3 7400.72   30.83
   7   4  -3 7457.32   39.65
   7   4  -3 7410.28   36.25
   9   1  -4 1539.67   16.46
   9   1  -4 1521.38   18.32
   9   1  -4 1550.66   15.94
   9  -1  -4 1582.72   16.27
   9  -1  -4 1587.40   16.03
   9   1  -4 1633.07   14.81
   9   1  -4 1662.42   17.23
   9   1  -4 1554.14   14.26
   9   1  -4 1674.60   17.78
   4  -1   5 2093.95   19.58
   4   1   5 2087.84   19.99
   4   1   5 2137.32   20.11
   4   1   5 2119.08   20.14
  -4   1  -5 2058.85   17.77
   5   5  -3 4410.86   26.91
   5   5  -3 4578.17   27.72
   5   5  -3 4558.37   29.25
   5  -5  -3 4437.88   24.83
  -5   5   3 4403.67   25.50
  -5   5   3 4676.27   31.08
   5  -5  -3 4436.17   24.79
  -5   5   3 4485.28   27.08
   5   5  -3 4428.81   26.69
   5   5  -3 4466.76   29.09
   5   5  -3 4628.48   29.61
   5   5  -3 4517.14   26.92
   5   5  -3 4351.61   28.58
   5   5  -3 4704.04   31.41
   3   1  -7  243.68    6.44
  -3   1   7  231.21    6.53
  -3  -1   7  233.70    5.95
   3   1  -7  218.49    6.68
  -3   1   7  229.99    6.49
   3   1  -7  245.90    6.88
  -3  -1   7  242.13    6.28
   3  -1  -7  244.44    6.97
   9  -2  -211908.50   46.30
   9   2  -211990.90   49.10
   9   2  -211665.20   48.43
   9  -2  -211875.70   46.51
  -9   2   211371.60   39.31
   9   2  -211891.10   43.85
   9   2  -211822.40   39.67
   9  -2  -211206.10   40.83
   9   2  -211765.60   49.54
   0   5   4 1905.75   17.55
   0   5   4 1780.84   14.75
   0   5   4 1791.73   14.63
   0   5   4 1785.00   18.70
   0   5   4 1778.49   15.04
   0   5  -4 1759.87   17.89
   0   5  -4 1821.60   17.83
   0   5  -4 1747.72   18.86
   0   5  -4 1897.30   19.68
   0   5  -4 1736.83   16.91
   2  -1   6 3380.53   24.60
   2  -1   6 3263.62   23.98
  -2   1  -6 3413.68   22.17
   2   1   6 3315.51   25.76
   2   1   6 3193.83   24.73
   9   0   0 3659.79   24.46
   9   0   0 3652.37   25.08
   8  -2   1   41.76    3.54
   8   2   1   47.35    3.39
   8   2   1   42.93    3.37
   8   2   1   46.56    3.15
   8   2   1   45.05    4.33
   8  -2   1   45.53    3.71
   8   2   1   39.49    3.15
  -4  -1   7 1253.64   12.62
   4   1  -7 1238.83   14.90
   4   1  -7 1492.71   14.49
   4  -1  -7 1530.49   18.30
  -4   1   7 1217.60   13.63
   4   1  -7 1256.03   13.56
  -4  -1   7 1226.25   14.34
  -4   1   7 1252.92   14.68
   4   1  -7 1310.79   15.39
  -5   4   513345.40   48.57
   5  -4  -512992.20   48.92
  -5   4   512791.50   46.14
  -5   4   513210.10   46.42
  -5   4   513347.90   50.57
   5  -4  -513860.20   50.79
   5   4  -513084.00   53.02
   5   4  -512967.90   52.24
   5   4  -513676.60   54.69
   5   4  -513264.30   51.47
   5   4  -513392.70   46.40
   5   4  -513141.30   52.30
   5   4  -513274.40   49.77
   2  -1  -7  669.07   11.51
  -2   1   7  680.76   10.93
  -2  -1   7  694.99   10.19
   2   1  -7  702.14   10.75
  -2  -1   7  734.18   10.90
  -2   1   7  711.29   11.51
   2   1  -7  686.26   10.63
   2   1  -7  698.12   10.97
  -3   4  -4 4321.92   30.08
   3   4   4 4128.26   24.10
   3   4   4 4197.15   28.92
  -3   4  -4 4183.39   27.39
  -3   4  -4 4153.08   30.32
   3   4   4 3976.72   24.04
   3   4   4 4112.93   26.02
  -3   4  -4 4389.67   27.91
   3   4   4 4121.17   23.35
  -3   4  -4 3845.44   29.11
   1   6  -2 9802.44   40.68
   1   6  -2 9639.31   39.27
  -1   6   2 9273.23   43.09
   1   6  -2 9284.97   44.17
  -1   6   2 9542.77   40.36
   1   6  -2 9030.76   42.30
   1   6  -2 9617.09   40.18
  -1   6   2 9357.54   41.13
  -1   6   2 9022.14   35.39
   1   6  -2 9507.77   45.26
  -1   6   2 9369.48   39.20
  -1   6   2 9400.66   40.90
   1   6  -2 9357.96   38.23
   1   6  -2 9336.31   37.53
   1   6  -2 9650.54   39.69
  -1   6   2 9114.73   40.16
  -9   2   3 7681.08   35.56
   9   2  -3 7486.52   39.24
   9   2  -3 7782.04   39.27
   9   2  -3 7923.87   39.46
   9  -2  -3 7701.45   36.67
   9  -2  -3 7712.68   37.20
   9   2  -3 7645.86   36.02
   7   3  -5   19.00    3.57
   7   3  -5   21.40    3.11
  -7   3   5   17.95    3.34
   7  -3  -5   20.41    2.83
   7   3  -5   22.13    2.88
   7   3  -5   19.56    3.77
   7  -3  -5   20.07    3.02
   7   3  -5   21.94    3.23
   7   3  -5   16.62    2.54
   7   3  -5   22.27    3.77
  -5   3   6 2795.27   18.17
   5   3  -6 2752.69   22.39
  -5   3   6 2720.47   20.77
   5  -3  -6 2774.90   22.34
   5  -3  -6 2709.53   21.63
   5   3  -6 2697.20   21.51
   5   3  -6 2624.46   23.26
   5   3  -6 2742.02   20.62
  -5   3   6 2715.46   20.40
   5   3  -6 2874.03   24.10
   5   3  -6 2731.96   21.61
  -5   0   7    8.07    2.46
   5   0  -7    0.22    2.99
   5   0  -7    1.41    3.02
   5   0  -7    5.76    2.33
   8  -2  -5 1314.27   15.36
   8   2  -5 1354.76   15.80
   8   2  -5 1360.25   12.62
   8   2  -5 1395.09   16.08
   8   2  -5 1354.15   15.19
   8   2  -5 1337.14   16.68
  -4   5  -2  971.62   12.42
   4   5   2  969.51   12.93
  -4   5  -2  976.72   14.63
  -4   5  -2 1012.66   13.61
   4   5   2  940.48   14.60
  -4   5  -2  902.28   12.37
  -4   5  -2  849.56    9.64
  -4   5  -2  968.49   15.29
   4   5   2  908.64   14.51
   4   5   2  839.50   11.24
   4   5   2  954.37   11.84
   0   6   219644.20   61.02
   0   6  -219580.00   61.14
   0   6   219834.90   61.05
   0   6  -220143.10   59.65
   0   6   219611.50   55.19
   0   6  -219710.70   61.29
   0   6   219883.50   66.45
   0   6  -220317.10   59.13
   0   6  -220232.40   64.67
   0   6  -219804.90   60.78
   0   6  -219887.00   59.40
   0   6   219797.50   61.51
   0   6   220204.30   61.49
   0   6   219864.00   63.62
   0   6  -219703.90   68.29
   0   6  -219853.00   67.88
   7   4   0  139.04    6.35
   7   4   0  117.26    4.38
  -7   4   0  120.87    4.21
  -7   4   0  120.32    6.31
   7   4   0  121.35    5.68
   7  -4   0  119.00    4.49
   7   4   0  127.10    5.31
   7   4   0  119.03    5.55
   7  -4   0  125.71    4.71
  -7   4   0  126.10    4.60
  -7   4   0  116.81    4.74
   7   4   0  125.72    6.21
  -1   0   7    0.94    2.37
  -1   0   7   -0.24    2.23
   1   0  -7    1.86    2.57
   8   3   0  216.51    7.54
   8   3   0  222.49    7.17
  -8   3   0  196.17    7.20
   8   3   0  200.53    6.71
  -8   3   0  196.24    4.93
   8  -3   0  212.20    6.06
   8   3   0  209.89    5.95
   8   3   0  205.17    6.65
   8  -3   0  220.11    6.29
  -8   3   0  215.71    5.77
   2   6   1  843.42   11.76
   2   6   1  800.86   11.04
  -2   6  -1  852.36   12.98
   2   6   1  811.45   13.17
  -2   6  -1  835.13   11.26
  -2   6  -1  844.66   13.89
  -2   6  -1  846.37   11.69
   2   6   1  799.33   10.86
  -2   6  -1  796.13   11.72
  -2   6  -1  850.40   11.96
   2   6   1  818.60   11.53
  -2   6  -1  841.53   11.51
   2   6   1  855.95   10.77
  -2   6  -1  849.85   10.36
  -4   5   4 4381.78   26.53
   4   5  -4 4269.57   27.43
   4   5  -4 4325.68   27.89
   4   5  -4 4376.71   29.99
   4   5  -4 4318.29   29.43
   4  -5  -4 4313.45   24.70
   4   5  -4 4291.05   27.63
   4   5  -4 4337.41   27.32
  -4   5   4 4333.82   28.46
  -4   5   4 4334.29   26.52
   4  -5  -4 4293.32   24.65
   2   6  -2 4716.30   28.59
   2   6  -2 4765.85   27.95
  -2   6   2 4625.29   26.19
  -2   6   2 4761.52   27.84
   2   6  -2 4776.85   29.34
   2   6  -2 4730.26   28.85
   2   6  -2 4761.64   31.31
   2   6  -2 4624.09   30.23
  -2   6   2 4743.03   28.39
  -2   6   2 4616.33   29.03
   2   6  -2 4745.08   30.56
  -2   6   2 4591.16   29.23
  -2   6   2 4477.76   25.43
   2   6  -2 4743.90   25.47
  -2   6   2 4672.29   28.75
   2   6  -2 4558.60   29.16
   9   1   012247.30   45.74
   9   1   012066.40   49.13
   9   1   012177.00   45.59
   9   1   012363.70   46.89
   9  -1   012420.50   48.48
   0   3  -6  173.91    6.63
   0   3   6  184.63    6.10
   0   3  -6  191.50    5.81
   0   3  -6  193.78    6.71
   0   3   6  190.63    6.10
   0   3   6  182.66    5.54
   9   2  -1  700.09   11.51
   9  -2  -1  729.91   11.25
   9  -2  -1  687.09   10.91
  -9   2   1  710.91   10.80
   9   2  -1  703.40   12.13
   9   2  -1  734.19   10.06
   9   2  -1  708.03    9.49
   9   2  -1  706.20    9.26
   7   0   3   -0.31    2.52
   7   0   3    1.10    2.23
   7   0   3   -0.04    2.70
   5   5   1   23.60    4.12
  -5   5  -1   14.94    4.00
  -5   5  -1   21.53    2.59
  -5   5  -1   16.20    2.52
  -5   5  -1   15.15    2.57
   5   5   1   16.73    3.14
   5   5   1   17.63    3.02
   5   5   1   26.23    3.03
   5   5   1   17.31    3.73
  -5   5  -1   18.60    2.32
   5   5   1   14.95    3.16
  -3   6   1 1031.56   14.12
   3   6  -1 1005.95   13.17
   3   6  -1  994.28   12.16
   3   6  -1 1012.93   13.15
   3   6  -1  958.52   14.16
  -3   6   1 1027.82   13.85
  -3   6   1  988.53   12.57
  -3   6   1 1048.09   13.73
   3   6  -1 1058.92   13.54
   3   6  -1 1009.92   13.98
  -3   6   1  982.73   12.69
  -3   6   1 1019.79   10.78
   3   6  -1 1000.82   13.07
  -3   6   1 1045.46   13.12
   3   6  -1 1026.47   13.42
   8   3  -4  794.59   12.88
   8  -3  -4  776.53   11.76
   8   3  -4  772.70   10.66
  -8   3   4  776.05   12.53
   8   3  -4  793.24   12.19
   8   3  -4  754.60   12.49
   8   3  -4  823.29   12.57
   8  -3  -4  761.23   11.54
   8   3  -4  755.88   12.69
   1   4   5  639.48    9.73
  -1   4  -5  657.69   11.19
  -1   4  -5  657.60    9.84
  -1   4  -5  659.26   10.36
   1   4   5  674.26    9.96
  -1   4  -5  629.80   12.47
   1   4   5  683.35   10.93
   1   4   5  681.32   10.42
  -1  -4  -5  669.57   10.49
  -1   4  -5  672.05   12.21
  -1   4  -5  675.67   11.20
   5   1  -7 2089.51   17.40
   5   1  -7 2110.54   17.52
  -5   1   7 2188.16   18.60
   5   1  -7 2048.73   19.20
   5   1  -7 2096.81   20.18
   5   1  -7 2108.24   17.17
   5   1  -7 2095.50   17.27
   5  -1  -7 2220.85   20.22
  -5  -1   7 2223.60   16.87
   3   6   0 1934.77   19.37
  -3   6   0 1959.43   17.05
   3   6   0 1880.45   18.04
   3   6   0 1869.45   17.36
  -3   6   0 1906.76   16.41
  -3   6   0 1874.25   17.65
   3   6   0 1816.99   17.72
   3   6   0 1844.63   17.46
   3   6   0 1885.19   17.78
  -3   6   0 2029.97   18.92
  -3   6   0 1866.70   17.99
  -3   6   0 1896.60   17.73
  -3   6   0 1894.44   19.94
  -3   6   0 1901.16   17.94
  -1   1   7  543.39    9.98
  -1   1   7  582.38   10.36
   1   1  -7  538.41   10.38
   1   1  -7  570.93    9.44
  -1  -1   7  524.41    9.39
   1   1  -7  549.75    9.56
  -1  -1   7  563.86    9.47
   6   5  -1 6752.00   38.18
   6   5  -1 6913.71   34.30
   6   5  -1 6733.22   35.53
   6   5  -1 6897.09   38.92
   6   5  -1 7077.47   38.90
   6   5  -1 6859.95   36.82
   6   5  -1 6714.70   32.34
   6  -5  -1 6979.58   30.36
   6   5  -1 6422.21   30.96
  -6   5   1 6653.77   35.53
  -6   5   1 6814.17   35.36
  -6   5   1 6768.83   32.05
  -6   5   1 6711.31   38.52
   6  -5  -1 6617.52   29.50
   6   5  -2 3533.73   27.09
   6   5  -2 3521.92   25.47
   6   5  -2 3373.78   24.30
   6   5  -2 3573.77   25.35
   6   5  -2 3493.68   24.64
   6   5  -2 3629.02   22.00
   6   5  -2 3297.58   25.48
   6   5  -2 3546.55   24.81
   6   5  -2 3674.14   28.33
  -6   5   2 3613.99   24.91
   6  -5  -2 3535.44   21.68
   6  -5  -2 3506.17   21.71
  -6   5   2 3421.55   22.16
  -6   5   2 3548.29   26.64
  -6   5   2 3518.73   23.61
  -6   5   2 3544.09   25.74
   7   2  -6 9093.53   40.94
   7   2  -6 9153.96   38.04
   7   2  -6 8889.53   44.04
   7   2  -6 8787.05   44.50
   7  -2  -6 9089.37   41.06
   7   2  -6 8869.48   42.17
  -7   2   6 9008.09   40.78
   7  -2  -6 9122.83   40.98
  -7   2   6 9232.11   40.13
   7  -2  -6 8811.29   36.60
   8   0   2 7807.61   31.41
   8   0   2 7873.11   38.60
   1   6   2  486.26    8.94
  -1   6  -2  481.83    9.10
   1   6   2  485.88    9.12
  -1   6  -2  474.92    9.21
   1   6   2  499.93    8.50
   1   6   2  445.32    8.30
   1   6   2  462.15   10.07
  -1   6  -2  487.41    9.60
  -1   6  -2  535.33   10.65
  -1   6  -2  462.36   10.14
   1   6   2  462.04    8.52
  -1   6  -2  508.57    8.77
  -1   6  -2  489.15    9.41
  -1   6  -2  461.95    8.32
   3   5   3 2912.85   19.55
  -3   5  -3 2860.62   22.34
  -3   5  -3 2741.32   22.14
  -3   5  -3 2692.50   25.22
  -3   5  -3 2783.96   24.48
   3   5   3 2728.94   21.34
   3   5   3 2803.82   20.47
  -3   5  -3 2749.19   18.85
   3   5   3 2749.89   24.72
  -3   5  -3 2879.11   23.97
  -1   5  -4 1581.38   17.05
   1   5   4 1510.39   15.60
   1   5   4 1493.46   14.52
  -1   5  -4 1554.98   18.04
  -1   5  -4 1513.84   17.86
  -1   5  -4 1482.75   15.18
  -1   5  -4 1468.14   16.96
   1   5   4 1421.55   11.96
   1   5   4 1450.03   17.09
   7   1   3 7155.41   37.64
  -7   1  -3 7408.69   35.23
   7  -1   3 7247.00   31.90
   7   1   3 7370.58   36.84
   7  -1   3 7220.78   37.22
   7   1   3 7138.96   33.73
   7   1   3 7149.47   35.32
   7  -1   3 7254.45   37.68
   6   0   4 3601.89   26.40
   6   0   4 3602.44   27.24
   6   0   4 3633.21   24.61
  -3   3  -510555.20   44.72
  -3   3  -510457.40   42.50
   3   3   510728.30   46.28
   3   3   510629.20   43.75
   3  -3   510568.30   40.94
  -3   3  -511098.50   49.38
  -3   3  -510687.30   47.48
   3   3   510355.90   37.51
   3  -3   510046.30   40.09
  -3   3  -510512.90   45.47
   3   3   510486.40   42.81
   3   3   510667.70   44.21
  -3   6   210860.10   46.03
   3   6  -210333.80   44.70
   3   6  -210515.60   46.81
  -3   6   210181.60   37.92
   3   6  -210673.00   47.34
   3   6  -210207.30   44.89
  -3   6   2 9929.33   41.85
   3   6  -210644.00   44.41
  -3   6   210618.90   43.42
  -3   6   210420.60   45.64
   3   6  -210452.70   47.04
  -3   6   210194.60   43.19
   3   6  -210529.80   44.51
   3   6  -210428.20   45.03
  -3   6   210288.40   43.42
   9   0  -5    0.55    2.40
   9   0  -5   -0.76    2.03
   9   0  -5    0.87    2.46
   9   0  -5    1.72    3.36
   9   0  -5    0.30    4.04
   8   0  -6 2569.49   21.63
   8   0  -6 2541.70   24.02
   8   0  -6 2549.95   18.48
   8   0  -6 2503.94   21.16
   8   0  -6 2578.82   20.10
   8   0  -6 2513.81   20.05
   9   2  -4 9661.63   47.42
   9   2  -4 9589.23   44.23
   9  -2  -4 9821.61   42.84
   9   2  -4 9905.26   45.57
   9  -2  -4 9904.09   42.62
   9   2  -410028.40   43.20
   4   2   5 3166.61   24.30
  -4   2  -5 3123.03   23.61
  -4   2  -5 3229.06   26.02
   4  -2   5 3100.40   22.91
   4   2   5 3073.08   24.61
   4   2   5 3274.00   24.68
   4  -2   5 3198.18   23.81
  -4   2  -5 3097.85   23.50
  -7   4   4 7384.00   39.12
   7   4  -4 7575.03   32.57
   7  -4  -4 7345.56   36.24
   7   4  -4 7180.76   38.02
   7  -4  -4 7232.81   35.41
   7   4  -4 7332.46   39.62
   7   4  -4 7273.02   36.34
   7   4  -4 7144.10   37.38
   7   4  -4 7453.07   40.86
   7   4  -4 7622.34   39.46
  -7   4   4 7311.36   30.62
   7   4  -4 7273.37   37.17
   3   2  -7 2158.63   19.03
   3   2  -7 2166.14   18.25
  -3   2   7 1879.42   17.51
   3  -2  -7 2037.62   19.78
  -3   2   7 1939.75   18.91
   3   2  -7 1897.83   18.87
   3   2  -7 1863.95   17.89
   6   3   3 1933.84   16.55
   6   3   3 1956.16   17.31
  -6   3  -3 2096.66   17.91
   6   3   3 1983.66   18.26
   6  -3   3 1966.18   17.86
   6   3   3 1905.61   17.10
  -6   3  -3 2036.67   16.27
  -6   3  -3 2109.71   22.38
   6  -3   3 1938.24   17.71
   6   3   3 2030.55   19.86
  -6   0   7    1.14    2.16
   6   0  -7   -1.01    3.28
   6   0  -7   -1.72    2.68
   6   0  -7    5.34    2.42
   6   0  -7    0.95    2.04
   6   0  -7    0.47    2.31
   6   4   2   27.78    4.58
   6   4   2   27.94    3.39
   6  -4   2   20.73    2.62
   6   4   2   21.78    2.87
   6   4   2   22.25    3.20
   6   4   2   25.18    2.39
  -6   4  -2   39.13    4.52
  -6   4  -2   23.09    2.50
   6  -4   2   18.87    2.32
  -6   4  -2   30.74    3.77
  -6   4  -2   27.75    2.93
   7  -3   2  515.46    9.25
   7   3   2  524.56    8.51
   7   3   2  505.10    8.51
   7  -3   2  572.26   10.07
   7   3   2  566.79   10.32
   7   3   2  524.29    9.47
   7   3   2  554.31    9.51
  -7   3  -2  569.19   11.96
  -7   3  -2  565.47    8.89
   7   3   2  541.66   11.63
   7   3   2  551.29   11.00
  -7   3  -2  547.14    8.39
  -2   2  -6  891.27   14.34
   2  -2   6  946.67   12.39
   2   2   6 1011.95   14.24
   2   2   6  866.57   12.92
   2  -2   6  927.12   12.49
   2   2   6  963.40   13.41
  -2   2  -6  958.65   13.02
   8   1   2 1217.37   12.51
   8   1   2 1215.00   14.39
   8  -1   2 1248.35   15.28
   8   1   2 1234.37   14.91
   4  -2  -7 4063.92   27.53
   4   2  -7 3921.83   22.96
   4   2  -7 4093.27   24.48
  -4   2   7 3878.66   25.09
   4   2  -7 3805.99   26.05
   4   2  -7 4008.87   28.00
   0   0   7    1.17    2.71
   0   0   7    0.42    2.40
   0   0  -7    0.09    2.25
  -5   4  -3 1081.51   13.03
   5   4   3 1021.03   14.72
  -5   4  -3 1079.66   13.45
   5  -4   3  944.15   11.11
   5   4   3  990.45   10.74
  -5   4  -3 1035.63   14.19
   5  -4   3  956.96   11.30
  -5   4  -3  993.87   15.13
  -5   4  -3  986.46   15.54
   5   4   3  985.00   13.18
   6   1   4  341.12    8.26
   6  -1   4  349.27    8.36
  -6   1  -4  345.87    8.50
  -6   1  -4  355.76    7.88
   6  -1   4  372.52    8.60
   6   1   4  352.65    7.53
   6   1   4  345.09    8.16
   6   3  -6  358.55    7.25
   6   3  -6  377.80    7.94
   6  -3  -6  381.08    8.45
   6   3  -6  392.38    8.78
  -6   3   6  404.73    8.38
   6   3  -6  382.77    8.21
   6   3  -6  349.66    9.22
   6   3  -6  386.92    9.21
  -6   3   6  375.07    8.12
   6  -3  -6  379.90    8.32
  -6   3   6  367.13    6.79
  -2  -2   7 1493.48   13.65
  -2  -2   7 1538.11   13.77
  -2   2   7 1542.01   16.40
  -2   2   7 1601.58   17.29
   2   2  -7 1659.76   16.96
   2   2  -7 1488.07   14.23
   2  -2  -7 1683.45   18.32
  -2   2   7 1529.43   14.34
   2   2  -7 1581.02   16.22
   2   2  -7 1598.38   16.87
   6  -4  -5 3291.76   23.52
   6   4  -5 3007.57   24.23
  -6   4   5 3259.11   22.01
   6  -4  -5 3093.71   22.79
  -6   4   5 3226.99   24.68
  -6   4   5 3128.73   20.39
   6   4  -5 3185.39   24.74
   6   4  -5 3241.97   25.36
   6   4  -5 3121.48   22.36
   6   4  -5 3101.80   25.41
   6   4  -5 2870.51   24.68
   6   4  -5 2990.90   21.13
  -6   5   0  251.80    6.64
  -6   5   0  265.63    6.69
   6   5   0  249.72    7.81
   6   5   0  259.05    7.84
   6   5   0  260.49    8.43
   6   5   0  255.22    7.51
   6   5   0  265.47    7.39
   6   5   0  263.01    6.70
  -6   5   0  244.35    8.18
  -6   5   0  243.25    6.51
   5   5  -4 2606.84   22.14
  -5   5   4 2607.39   20.23
  -5   5   4 2437.98   19.12
   5   5  -4 2559.80   18.70
   5   5  -4 2514.72   22.23
   5  -5  -4 2325.31   17.63
  -5   5   4 2519.39   17.84
   5   5  -4 2493.66   23.18
   5  -5  -4 2512.71   19.10
   5   5  -4 2578.54   22.24
   5   5  -4 2338.64   19.47
   5   5  -4 2531.83   20.48
  -5   5   4 2591.32   22.06
   5   5  -4 2462.54   20.62
   9   1  -5    7.07    2.18
   9   1  -5    5.84    2.64
   9   1  -5   10.43    1.86
   9  -1  -5   10.40    2.59
   9   1  -5    6.85    4.78
   9   1  -5    8.17    2.38
   9  -1  -5    8.74    2.80
   9  -1  -5    9.36    3.30
   9   1  -5    8.96    2.97
   8   1  -6 6650.05   30.40
   8   1  -6 6523.05   39.46
   8  -1  -6 6556.14   32.52
   8   1  -6 6402.33   29.61
   8   1  -6 6634.87   36.19
   8  -1  -6 6599.63   33.49
   8   1  -6 6693.97   30.64
   8  -1  -6 6567.45   34.49
   8  -1  -6 6717.07   30.95
   8   1  -6 6577.71   35.12
   8  -1  -6 6689.68   35.54
  -6   5   3  309.23    8.19
   6   5  -3  304.45    7.51
   6   5  -3  312.07    8.06
   6   5  -3  280.44    7.36
   6   5  -3  322.74    7.15
   6   5  -3  312.35    8.89
  -6   5   3  315.14    7.71
   6  -5  -3  299.07    6.52
   6   5  -3  282.26    7.97
  -6   5   3  320.00    6.94
  -6   5   3  305.03    7.45
   6  -5  -3  319.06    6.81
   6   5  -3  327.71    8.69
   6   5  -3  297.59    7.13
  -3   6  -1 2533.33   19.62
   3   6   1 2489.73   23.12
  -3   6  -1 2469.08   19.38
  -3   6  -1 2443.52   20.67
  -3   6  -1 2509.84   23.61
   3   6   1 2442.23   18.90
   3   6   1 2538.81   20.57
  -3   6  -1 2498.43   21.10
  -3   6  -1 2452.01   17.39
   3   6   1 2421.57   20.47
   3   6   1 2503.11   19.58
  -3   6  -1 2542.73   21.36
   3   6   1 2481.88   21.37
   3   6   1 2575.13   17.12
   6   1  -7   79.10    5.41
  -6  -1   7   79.97    3.61
   6  -1  -7   87.90    4.43
   6  -1  -7   90.84    4.05
   6   1  -7   79.67    4.68
   6  -1  -7   78.94    4.81
   6  -1  -7   77.61    4.39
   6   1  -7   81.86    4.08
   6   1  -7   77.20    3.87
   6   1  -7   79.69    3.63
  -6   1   7   79.68    4.23
   3   0   637796.30   98.38
   3   0   637336.50   98.85
   9   2   0 2126.36   21.26
   9   2   0 2005.02   16.82
   9   2   0 2022.31   15.89
   9  -2   0 2169.23   19.40
   9   2   0 2008.74   16.62
   9   2   0 2088.85   19.39
   9  -2   0 2131.17   19.16
   1   3   6  804.48   12.01
   1   3   6  774.95   11.19
   1   3   6  797.87   11.66
  -1   3  -6  787.06   13.08
  -1   3  -6  829.79   12.89
  -1   3  -6  823.70   10.53
  -4   6   1   37.72    3.77
  -4   6   1   36.55    3.31
   4   6  -1   38.54    3.55
  -4   6   1   37.25    3.29
   4   6  -1   36.68    3.15
   4   6  -1   40.60    3.54
   4   6  -1   37.79    3.69
   4   6  -1   36.57    3.57
  -4   6   1   34.16    3.85
   4   6  -1   43.16    4.33
   4   6  -1   41.54    3.80
  -4   6   1   37.46    3.46
  -4   6   1   40.30    3.61
   4   6  -1   38.37    3.69
  10   0  -2 8553.92   37.10
  10   0  -2 8467.42   37.23
   0   1  -710478.60   40.57
   0   1   710667.50   45.05
   0   1  -710628.80   40.68
   0  -1   710436.30   43.29
   0   1   711278.40   46.47
   0  -1   711006.20   45.52
   0   1  -710403.80   48.48
   0  -1  -710443.30   41.85
  -1   6   3 1005.11   13.77
   1   6  -3  956.16   12.18
   1   6  -3 1003.77   12.34
   1   6  -3  970.51   12.52
   1   6  -3  995.16   13.93
  -1   6   3  995.82   12.59
   1   6  -3  984.62   13.63
  -1   6   3  997.49   12.49
   1   6  -3 1038.69   12.66
   1   6  -3 1028.54   14.80
  -1   6   3 1000.77   12.71
  10   0  -3    0.57    2.24
  10   0  -3    1.86    2.54
  10   0  -3    0.68    2.26
  10   0  -3    0.17    2.70
   5  -3   4  446.67    8.59
   5   3   4  452.38    8.67
   5   3   4  474.01    9.51
   5   3   4  492.87    9.44
  -5   3  -4  482.09    9.16
   5  -3   4  452.00    8.72
  -5   3  -4  484.16    8.26
  -5   3  -4  467.45   10.29
  -5   3  -4  490.91   10.59
   5   3   4  459.34    8.99
  -5   3  -4  463.38    9.76
  -2   6  -2 8535.21   35.43
   2   6   2 8588.15   37.86
   2   6   2 8539.81   36.00
  -2   6  -2 8743.62   42.64
  -2   6  -2 8654.13   40.64
  -2   6  -2 8724.64   44.80
  -2   6  -2 8821.18   36.59
   2   6   2 8613.26   36.77
   2   6   2 8686.17   43.95
  -2   6  -2 8371.99   39.04
   2   6   2 8743.71   38.96
  -2   6  -2 8574.97   39.95
   2   6   2 8832.27   35.59
  -2   6   3 7860.09   38.49
  -2   6   3 7783.93   33.45
  -2   6   3 7819.93   34.70
   2   6  -3 7880.01   38.93
   2   6  -3 7875.08   41.28
  -2   6   3 7851.05   37.15
   2   6  -3 7849.05   39.14
   2   6  -3 8178.85   37.04
  -2   6   3 8078.84   38.10
   2   6  -3 7851.00   35.65
   2   6  -3 7949.95   35.68
  -2   6   3 7984.00   35.46
  -2   6   3 8124.27   37.49
   2   6  -3 7812.74   33.31
   2   6  -3 7679.06   38.66
  -7   4  -1  733.99   13.76
  -7   4  -1  800.46   10.59
   7  -4   1  760.25   10.55
   7   4   1  783.86   14.62
   7   4   1  751.16   11.95
   7   4   1  795.62   13.28
   7   4   1  815.10   13.02
   7   4   1  790.31   11.83
   7   4   1  756.84    9.43
  -7   4  -1  780.11   10.80
   7  -4   1  761.49   10.57
  -5   2   7 1854.31   17.87
   5   2  -7 1774.71   17.60
   5   2  -7 1803.74   19.36
   5   2  -7 1797.82   16.79
   5  -2  -7 1753.89   17.76
   5   2  -7 1849.31   20.16
   5   2  -7 1799.92   16.36
   5  -2  -7 1863.20   18.27
   8   4  -211527.30   44.18
  -8   4   211838.50   48.56
   8  -4  -211365.80   44.53
  -8   4   211476.80   48.31
  -8   4   211295.80   44.28
   8  -4  -211377.70   44.41
   8   4  -211235.00   43.93
   8   4  -211663.50   51.55
   8   4  -211848.80   49.08
   8   4  -211807.40   45.55
   8   4  -210969.20   51.17
   8   4  -211563.30   51.14
   9   0   1    4.35    2.50
   9   0   1    0.03    2.63
   1   2  -7 5838.48   30.36
  -1  -2   7 6045.07   29.73
   1   2  -7 6178.30   33.27
   1   2  -7 6101.23   31.65
  -1   2   7 6210.01   33.97
  -1   2   7 6087.83   30.91
   1   2  -7 5929.25   34.03
  -1   2   7 6049.28   34.94
  -1  -2   7 6220.66   29.04
  -2   4  -5  658.88    9.02
  -2   4  -5  629.51   10.91
  -2   4  -5  662.32   11.26
  -2   4  -5  658.88   12.39
  -2   4  -5  664.41   12.02
  -2   4  -5  681.50   10.99
   2   4   5  650.41    9.60
   2   4   5  662.56   10.80
   2   4   5  669.67    9.95
   2   4   5  619.89   10.06
   2   4   5  617.51    9.61
  -3   4   6 6241.24   28.54
  -3   4   6 6357.94   31.95
   3   4  -6 6043.85   31.81
   3   4  -6 6037.49   35.28
   3   4  -6 6157.64   32.36
   3   4  -6 6073.77   33.58
   3   4  -6 6256.54   33.60
   3   4  -6 6028.39   33.70
   3   1   6  712.10   11.68
   3  -1   6  668.74   11.29
   3   1   6  695.76   11.65
   3  -1   6  691.58   11.58
  -3   1  -6  729.05   13.31
   3   1   6  693.96   11.80
  -9   3   2  144.53    5.90
  -9   3   2  133.79    4.46
   9   3  -2  145.12    5.07
   9   3  -2  139.09    4.82
   9   3  -2  139.75    5.69
   9  -3  -2  137.82    5.05
   9  -3  -2  138.79    5.36
   9   3  -2  146.81    4.78
   9   3  -2  143.11    6.09
   9   3  -2  143.10    5.82
   9   3  -2  144.45    6.19
   4   6   011907.70   46.91
  -4   6   011810.30   46.68
   4   6   012071.50   50.62
  -4   6   011911.90   52.74
  -4   6   011943.80   46.07
  -4   6   011788.00   46.51
  -4   6   011734.00   47.64
   4   6   011786.80   47.84
   4   6   011775.80   47.73
  -4   6   011464.60   42.15
   4   6   012275.80   47.58
   4   6   012070.40   49.11
  -4   6   011504.40   46.89
  -4   6   012092.20   45.16
   4   6   011699.40   49.23
   2  -4  -6  713.25   11.08
   2   4  -6  710.07   10.80
   2   4  -6  699.94   12.01
   2   4  -6  693.55   10.25
   2   4  -6  742.23   11.65
   2   4  -6  759.52   12.42
   2   4  -6  665.73    9.82
  -2   4   6  707.89   10.30
  -2   4   6  753.01    9.90
   0   6   3   14.26    2.78
   0   6  -3   15.34    3.64
   0   6  -3   16.77    3.68
   0   6  -3   13.38    2.48
   0   6  -3   14.59    2.90
   0   6   3   26.01    3.31
   0   6   3   12.26    2.71
   0   6  -3   19.64    2.68
   0   6  -3   11.09    2.70
   0   6   3   13.18    2.30
   0   6  -3   12.63    3.29
   0   6   3   12.07    3.35
  -4   6   2  880.61   12.16
   4   6  -2  888.96   13.89
  -4   6   2  849.22   11.97
   4   6  -2  884.32   11.39
   4   6  -2  879.91   13.25
   4   6  -2  922.10   13.00
   4   6  -2  881.17   13.06
   4   6  -2  906.13   12.65
  -4   6   2  917.34   12.24
  -4   6   2  921.56   13.26
   4   6  -2  913.63   11.41
  -4   6   2  911.05   13.18
  -4   6   2  884.80   12.25
   4   6  -2  860.59   12.02
   4   6  -2  881.98   12.83
   5   0   5   -0.46    3.05
   5   0   5   -0.75    2.40
   5   0   5    1.15    2.83
   8  -3   1 2639.51   20.75
   8   3   1 2681.74   24.85
  -8   3  -1 2654.99   17.86
  -8   3  -1 2745.55   25.21
   8  -3   1 2714.69   21.21
   8   3   1 2646.00   23.58
   8   3   1 2714.92   22.34
   8   3   1 2678.03   22.55
   8   3   1 2725.95   20.56
  10  -1  -2 6537.57   31.41
  10   1  -2 6746.06   31.81
  10   1  -2 6562.94   34.24
  10  -1  -2 6615.18   32.79
  10   1  -2 6718.88   31.06
  10   1  -2 6582.90   31.19
  10  -1  -2 6704.98   34.24
  10   1  -2 6462.46   33.71
  10  -1  -2 6781.45   34.31
  -7   2  -3 1001.55   12.48
   7   2   3 1037.94   14.08
   7   2   3 1001.25   12.49
   7  -2   3 1081.59   13.81
   7   2   3 1032.18   13.08
  -7   2  -3  940.47   14.56
   7  -2   3  980.83   13.36
  -2   5  -4  711.15   12.59
  -2   5  -4  821.30   13.25
   2   5   4  803.66   12.80
  -2   5  -4  879.44   12.62
  -2   5  -4  858.24   12.61
  -2   5  -4  799.19   12.80
  -2   5  -4  774.91   10.47
   2   5   4  763.96   10.98
   2   5   4  826.68   11.20
  10   1  -3 2818.73   19.38
  10  -1  -3 2750.81   21.21
  10   1  -3 2719.95   21.51
  10  -1  -3 2740.64   22.00
  10   1  -3 2776.79   19.69
  10   1  -3 2794.50   22.19
  10  -1  -3 2759.12   21.17
  10  -1  -3 2839.28   21.21
  10   1  -3 2749.28   22.62
  10   1  -3 2785.23   21.35
  -4   4  -4 4868.62   29.51
  -4   4  -4 4692.30   31.99
  -4   4  -4 4910.08   32.12
   4   4   4 4768.07   31.09
  -4   4  -4 4980.36   29.04
   4   4   4 4649.55   24.79
   4   4   4 4620.30   26.02
   4   4   4 4730.76   28.21
  -4   4  -4 4677.06   32.32
   4   4   4 4550.61   23.97
  -2   5   5  830.83   10.15
   2   5  -5  845.64   12.90
   2   5  -5  838.89   10.98
  -2   5   5  836.82   10.18
  -2   5   5  902.61   12.14
   2  -5  -5  865.18   11.16
   2  -5  -5  856.64   10.80
   2   5  -5  813.50   12.95
   2   5  -5  874.04   12.33
  -2   5   5  832.96   10.21
   2   5  -5  869.87   11.16
   2   5  -5  869.61   12.93
  -8   4   1 7994.08   42.70
  -8   4   1 8300.59   38.37
   8   4  -1 7678.22   40.77
   8   4  -1 8128.70   41.68
   8   4  -1 7835.58   41.68
   8   4  -1 7585.33   42.60
   8   4  -1 7962.02   37.10
  -8   4   1 7636.37   35.19
   8  -4  -1 8051.60   36.25
   8  -4  -1 7840.07   35.70
   9   3  -3 2350.20   19.65
   9   3  -3 2524.81   23.07
   9  -3  -3 2397.05   20.09
  -9   3   3 2352.06   21.78
   9  -3  -3 2355.87   19.96
   9   3  -3 2361.63   19.88
   9   3  -3 2450.55   17.98
   9   3  -3 2472.80   20.57
   9   3  -3 2368.84   22.35
   9   3  -3 2360.44   21.41
   9   3  -3 2375.20   20.48
  -3   6   3  575.78   10.33
   3   6  -3  570.09   10.98
  -3   6   3  582.68    9.85
  -3   6   3  570.09    9.21
  -3   6   3  586.24   10.22
   3   6  -3  554.44    9.13
   3   6  -3  555.79   11.11
  -3   6   3  573.71    8.91
   3   6  -3  548.06   10.59
  -3   6   3  587.63   10.44
   3   6  -3  596.38   10.85
  -3   6   3  630.15    9.36
   3   6  -3  567.72   10.43
   3   6  -3  582.36   10.51
   8   3  -5 2850.98   23.23
  -8   3   5 2965.24   24.06
   8  -3  -5 2912.80   22.60
   8   3  -5 2835.67   23.59
   8   3  -5 2880.86   24.54
   8   3  -5 2852.49   21.93
   8   3  -5 2818.98   24.29
   8   3  -5 2809.01   18.35
   8   3  -5 2946.50   24.32
   8   4  -3  939.15   14.44
   8   4  -3  940.12   13.81
   8   4  -3  890.92   12.53
   8  -4  -3  898.12   12.09
  -8   4   3  935.23   13.89
   8   4  -3  911.95   12.15
   8   4  -3  947.32   14.71
   8   4  -3  929.30   12.96
   8  -4  -3  894.58   12.00
   8   4  -3  895.51   12.58
   8   4  -3  902.58   11.88
   9   1   1 9652.04   40.90
   9   1   1 9454.25   43.37
   9  -1   1 9561.16   42.32
   9   1   1 9571.77   34.33
   9  -1   1 9363.08   41.93
   9   1   1 9542.75   41.54
  -4   4   6   95.39    4.36
  -4   4   6   69.83    3.59
   4   4  -6   69.53    3.95
   4   4  -6   75.20    4.51
   4   4  -6  106.71    4.64
   4   4  -6   73.67    4.71
   4   4  -6   76.94    4.61
   4  -4  -6   88.07    4.63
  -4   4   6   73.21    3.60
   4  -4  -6   90.95    4.46
   4   4  -6   74.81    4.67
   3   5  -5 1714.81   17.66
   3   5  -5 1768.54   18.17
   3   5  -5 1788.66   17.64
   3   5  -5 1768.10   18.40
   3   5  -5 1798.83   15.94
   3   5  -5 1699.03   14.30
   3   5  -5 1768.94   16.20
  -3   5   5 1787.79   16.03
  -3   5   5 1788.81   15.25
   3  -5  -5 1746.50   15.80
  -3   5   5 1796.32   16.09
  -3   5   5 1786.18   16.86
   3  -5  -5 1833.58   16.08
  -3   5   5 1779.67   17.13
   3   5  -5 1741.46   18.19
  10   0  -1    8.96    2.55
  10   0  -1    0.79    1.77
  10   0  -1    5.29    2.68
  -5   5  -2  678.73   10.87
  -5   5  -2  678.70   13.29
  -5   5  -2  660.03   10.75
  -5   5  -2  674.09   12.25
   5   5   2  677.63   12.63
   5   5   2  648.76   12.95
   5   5   2  658.49    9.75
   5   5   2  668.61   11.08
   8   2   2 1895.40   17.24
   8   2   2 1845.69   17.33
   8  -2   2 1940.96   18.31
   8   2   2 1877.32   16.43
   8   2   2 1952.89   19.23
   8   2   2 1871.33   17.12
   8  -2   2 1894.51   18.59
  -1   4   6    6.54    2.40
   1  -4  -6    8.92    2.51
  -1   4   6   10.35    2.35
   1   4  -6   12.48    3.44
   1   4  -6    9.90    2.93
   1   4  -6    7.64    3.31
  -1   4   6    7.03    2.41
   1   5  -5  638.64    9.78
   1   5  -5  622.86   10.25
   1   5  -5  654.20   10.50
   1   5  -5  634.20   10.22
   1   5  -5  640.52   11.68
  -1   5   5  621.75   10.13
   1  -5  -5  638.78    9.19
   1   5  -5  638.01   10.90
   1  -5  -5  652.35    9.35
  -1   5   5  653.05    8.83
   1   5  -5  648.59   11.42
  -1   5   5  654.16   10.65
   5  -1   5  857.35   12.68
   5  -1   5  907.65   13.41
   5   1   5  886.23   13.19
   5   1   5  919.80   12.93
  -5   1  -5  885.31   13.81
  -5   1  -5  853.98   12.17
   5   1   5  870.29   13.16
  10   0  -434372.60   85.87
  10   0  -434392.40   85.29
  10   0  -434388.10   83.92
  10   0  -434436.30   91.41
  10   0  -434118.90   83.75
   9   3  -1  401.64    9.46
  -9   3   1  383.45    9.47
  -9   3   1  397.45    8.28
  -9   3   1  394.09    7.04
   9   3  -1  395.94    7.52
   9   3  -1  419.19    9.38
   9  -3  -1  402.17    8.28
   9  -3  -1  406.32    8.38
   9   3  -1  391.30    9.06
   7   0  -7    5.21    3.00
   7   0  -7    6.46    3.95
   7   0  -7   -0.77    2.68
   7   0  -7    2.97    2.56
   7   0  -7    2.26    2.12
   7   0  -7    2.76    2.51
  -7   0   7    3.01    2.37
   6   2   4  136.31    5.23
  -6   2  -4  130.27    5.63
  -6   2  -4  153.04    6.08
   6   2   4  128.48    5.25
   6  -2   4  133.55    5.57
   6   2   4  132.26    5.35
   6   2   4  135.95    5.50
   6  -2   4  134.87    5.46
  -6   2  -4  145.09    6.24
  -1   0  -7    9.88    2.30
   1   0   7    0.55    2.92
   1   0   7    3.40    2.72
   9   2  -5 5105.75   32.76
   9   2  -5 5675.61   32.82
   9  -2  -5 5140.88   30.40
   9   2  -5 5308.31   30.43
   9  -2  -5 5583.03   31.31
   9   2  -5 5283.58   34.45
   9   2  -5 5381.93   32.80
   8   2  -6 2456.42   22.40
   8   2  -6 2442.34   23.04
   8   2  -6 2480.39   18.18
   8  -2  -6 2521.89   20.98
   8   2  -6 2398.02   21.67
   8  -2  -6 2412.58   20.89
  -8   2   6 2403.37   21.30
   8   2  -6 2567.19   21.30
   8  -2  -6 2518.87   21.24
   4   5   3  367.31    7.33
   4   5   3  405.04    8.54
  -4   5  -3  366.45    9.82
  -4   5  -3  364.58    8.08
   4   5   3  389.26    9.66
  -4   5  -3  365.46    9.37
  -4   5  -3  393.57    8.87
  -1   6  -3  295.88    7.43
   1   6   3  324.05    8.68
   1   6   3  306.39    6.65
  -1   6  -3  311.49    8.01
   1   6   3  286.86    6.28
   1   6   3  302.42    6.92
  -1   6  -3  283.22    8.23
   1   6   3  290.29    6.33
  -1   6  -3  290.63    6.19
  -1   6  -3  269.57    8.04
   1   6   3  289.49    7.31
  -1   6  -3  299.57    7.49
  -1   6  -3  301.13    7.51
  10  -1  -1 5324.80   30.51
  10  -1  -1 5247.67   30.19
  10   1  -1 5399.90   30.05
  10  -1  -1 5418.09   27.40
  10   1  -1 5338.75   30.89
  10   1  -1 5442.95   28.47
  10   1  -1 5352.87   28.66
  -6   2   7 3125.44   20.04
   6   2  -7 3137.72   26.16
  -6   2   7 3049.65   21.91
   6  -2  -7 3126.73   23.95
   6   2  -7 3109.18   22.26
   6   2  -7 3074.22   25.38
   6  -2  -7 3057.27   19.79
   6   2  -7 3122.64   23.32
   6  -2  -7 3029.95   23.00
   6   5   1    1.36    2.76
   6   5   1    7.94    3.85
  -6   5  -1    4.12    1.92
   6   5   1    6.66    2.82
   6   5   1    2.76    2.35
   6   5   1    4.15    2.84
   6   5   1    9.79    3.92
  -6   5  -1    3.85    2.41
  -6   5  -1    6.30    3.79
  -6   5  -1    3.77    2.05
   7   3  -6  364.32    8.54
   7   3  -6  351.55    9.01
   7   3  -6  331.28    7.39
   7   3  -6  344.72    9.21
   7  -3  -6  349.49    7.78
  -7   3   6  339.64    8.07
   7  -3  -6  333.03    7.75
   7   3  -6  332.90    7.53
  -4   5   5 7728.17   36.86
   4  -5  -5 7820.94   34.34
  -4   5   5 7408.21   34.15
  -4   5   5 7870.04   36.03
  -4   5   5 7823.14   35.24
   4   5  -5 7666.98   37.12
  -4   5   5 7687.66   36.44
   4   5  -5 7694.67   36.36
   4   5  -5 7557.05   38.57
   4   5  -5 8021.16   39.11
   4   5  -5 7869.41   38.97
   4   5  -5 7862.87   38.89
  10  -1  -4 5497.83   31.11
  10   1  -4 5378.00   30.59
  10  -1  -4 5716.59   30.71
  10   1  -4 5499.82   27.06
  10  -1  -4 5409.88   29.93
  10   1  -4 5635.26   31.69
  10   1  -4 5564.27   30.70
  10  -1  -4 5651.36   32.90
  10   1  -4 5396.46   31.98
   7   1  -7 6142.98   35.96
   7   1  -7 6210.44   31.71
   7  -1  -7 6184.06   32.56
   7   1  -7 6063.89   28.76
   7  -1  -7 6090.89   33.74
  -7   1   7 6380.64   32.44
  -7   1   7 5960.47   29.80
   7  -1  -7 6151.07   32.70
   7  -1  -7 5853.14   30.28
   7   1  -7 6273.11   36.25
   7  -1  -7 6022.44   33.19
   7   1  -7 6078.57   32.72
   7  -1  -7 6267.94   33.86
  -6   5   4 1784.64   15.70
   6   5  -4 1797.18   18.67
   6   5  -4 1830.93   16.86
   6   5  -4 1920.10   19.96
   6   5  -4 1673.59   17.72
  -6   5   4 1750.78   16.81
  -6   5   4 1868.90   14.09
   6   5  -4 1772.50   17.35
   6   5  -4 1811.56   18.61
   6  -5  -4 1753.22   15.94
  -6   5   4 1800.62   19.08
   0   2  -7   31.12    3.44
   0   2  -7   31.51    3.07
   0   2  -7   35.04    4.10
   0  -2   7   27.34    2.84
   0   2   7   26.65    3.65
   0   2   7   25.80    3.31
   0   2   7   25.72    3.06
   7   5  -2  492.98   10.46
  -7   5   2  458.67    7.89
  -7   5   2  500.54    9.19
   7   5  -2  453.72    9.09
   7  -5  -2  484.30    8.19
   7   5  -2  470.62    8.96
  -7   5   2  456.95    9.40
   7   5  -2  494.52    9.51
   7   5  -2  459.72    9.71
  -7   5   2  469.53    9.86
   7   5  -2  463.11   10.67
  -4   6  -1 1416.08   15.23
  -4   6  -1 1442.03   16.24
  -4   6  -1 1426.59   18.13
   4   6   1 1417.00   15.82
   4   6   1 1447.90   15.33
   4   6   1 1449.71   15.94
  -4   6  -1 1418.26   15.60
   4   6   1 1378.03   14.26
   4   6   1 1416.96   17.46
  -4   6  -1 1493.53   15.93
  -4   6  -1 1406.00   14.06
   4   6   1 1406.08   16.80
  -7   4   5  520.29    7.71
   7  -4  -5  551.94    9.76
  -7   4   5  550.13   10.61
   7   4  -5  522.96   10.34
   7   4  -5  540.76   10.93
   7   4  -5  547.72   10.56
   7   4  -5  570.59   11.13
   7   4  -5  533.80   10.65
   7   4  -5  544.15    8.97
   5   4  -6 3338.20   24.30
   5   4  -6 3218.06   20.70
   5  -4  -6 3344.75   23.79
   5   4  -6 3282.32   25.45
   5   4  -6 3400.32   24.75
  -5   4   6 3225.60   21.75
  -5   4   6 3273.56   22.94
  -5   4   6 3263.26   22.16
   5   4  -6 3226.44   25.55
  -5   4   6 3320.24   20.77
  -3   6  -213099.30   51.40
   3   6   212870.50   46.44
  -3   6  -212742.30   43.40
  -3   6  -212940.60   50.45
   3   6   213159.40   41.57
   3   6   213019.20   47.97
   3   6   213314.60   49.19
  -3   6  -213207.90   55.87
   3   6   212932.40   54.88
  -3   6  -212909.10   51.70
  -1   1  -7 5473.15   26.07
  -1   1  -7 5642.99   35.44
   1   1   7 5940.35   33.16
   1  -1   7 5680.36   31.17
  -1  -1  -7 5750.06   27.73
  -4   6   3  891.49   12.97
   4   6  -3  870.41   12.89
   4   6  -3  890.00   13.77
   4   6  -3  862.99   11.11
   4   6  -3  900.49   12.61
   4   6  -3  871.55   12.80
   4   6  -3  880.36   12.81
   4   6  -3  831.12   11.13
  -4   6   3  881.13   12.00
  -4   6   3  899.15   12.08
  -4   6   3  850.55   10.13
  -7   5   1 2222.19   21.60
  -7   5   1 2186.24   17.30
   7   5  -1 2279.56   20.39
   7  -5  -1 2278.17   16.86
   7   5  -1 2161.27   21.45
   7   5  -1 2297.73   18.99
   7   5  -1 2237.98   22.28
  -7   5   1 2308.67   20.06
   7   5  -1 2239.28   20.99
   7   5  -1 2222.49   16.78
   9   3  -4  225.52    5.77
   9  -3  -4  233.63    6.65
   9   3  -4  236.28    7.70
   9   3  -4  229.28    7.08
  -9   3   4  229.09    7.18
   9   3  -4  228.48    7.38
   9   3  -4  212.30    7.10
   0   5  -510389.70   44.51
   0   5  -510613.80   47.83
   0   5  -510807.20   42.57
   0   5   510748.90   44.58
   0   5   510631.60   42.79
   0   5  -510598.20   42.90
   0   5  -510923.10   48.51
   0   5   510304.10   36.87
   0   5   510515.50   37.23
   4   3   5 3198.69   23.42
   4   3   5 3152.69   23.07
  -4   3  -5 3184.52   23.91
  -4   3  -5 3152.50   24.62
   4   3   5 3131.42   22.36
   3   3  -7  681.62   11.65
   3   3  -7  673.54   11.65
   3   3  -7  647.47   10.44
   3   3  -7  663.37    9.17
   3   3  -7  633.50   10.80
  -3   3   7  643.03   10.29
  -3   2  -6   78.54    4.34
   3   2   6   80.24    4.77
   3  -2   6   80.55    4.40
   3   2   6   75.41    4.74
  -8   4   015598.80   62.53
   8   4   014952.60   59.86
   8  -4   014919.80   51.35
   8   4   014976.40   54.20
   8   4   015479.00   63.70
  -8   4   015232.30   50.68
   8   4   015643.50   58.47
  -2   3  -6  457.89   10.17
   2  -3   6  451.52    7.62
   2   3   6  451.24    8.85
   2   3   6  454.46    9.01
   2   3   6  438.33    7.41
  -2   3  -6  459.13    9.70
   5   6  -1 7406.42   33.63
  -5   6   1 7239.38   36.84
   5   6  -1 7428.06   37.99
   5   6  -1 7610.72   39.56
   5   6  -1 7395.99   38.55
  -5   6   1 7313.29   34.05
  -5   6   1 7494.74   35.80
   5   6  -1 7443.96   37.44
  -5   6   1 7528.71   39.03
  -5   6   1 7346.36   33.80
   0   4   6  170.22    5.40
   0   4  -6  179.68    6.61
   0   4  -6  173.42    5.58
   0   4  -6  176.28    6.86
   0   4   6  173.15    5.05
   0   4   6  171.64    4.88
  -4   3   7 1646.26   16.52
   4   3  -7 1645.58   18.56
   4   3  -7 1660.08   15.07
   4   3  -7 1596.42   16.84
   4   3  -7 1676.07   18.14
   4   3  -7 1600.04   15.05
  10   2  -212119.20   42.30
  10   2  -211967.00   49.86
  10   2  -211897.80   50.12
 -10   2   212171.70   47.63
 -10   2   211833.10   48.16
   8  -4  -4 6724.21   33.80
   8   4  -4 6749.63   33.00
  -8   4   4 6734.95   37.60
   8   4  -4 6817.91   38.01
   8   4  -4 6757.04   38.50
   9   0  -618867.20   63.80
   9   0  -618853.10   68.43
   9   0  -618903.40   57.65
   2   3  -7 4453.67   29.51
   2   3  -7 4545.06   27.86
 -10   2   314370.40   49.86
  10  -2  -314268.00   51.19
  10   2  -314261.20   54.22
   5   6  -210896.30   46.51
   5   6  -211223.70   46.66
  -5   6   211101.80   43.14
  -5   6   211045.80   44.49
  -5   6   211022.20   43.47
  -5   6   210853.70   47.75
   5   6  -210945.80   44.56
   5   6  -211027.00   41.98
   5   6  -211157.70   49.69
   5   6  -210656.60   45.88
   9   2   1   12.72    3.32
   9   2   1    7.58    2.33
   9  -2   1   11.63    2.91
   9   2   1    8.44    2.14
   9   2   1   10.29    3.49
  -7   5   3 6240.99   29.12
  -7   5   3 6229.21   35.86
   7  -5  -3 6475.86   30.54
   7   5  -3 6294.75   36.39
   7   5  -3 6481.07   34.32
   7   5  -3 6381.09   31.64
   7   5  -3 6343.62   37.66
   7   5  -3 6515.45   34.59
   7   5  -3 6457.17   28.56
   9   3   0   12.75    2.53
  -9   3   0   14.72    3.87
   9  -3   0   11.07    2.91
   9   3   0   11.67    2.96
   9   3   0   11.79    3.67
   9   3   0   11.43    3.53
  -5   2  -5  323.39    8.45
  -5   2  -5  361.14    8.01
  -5   2  -5  338.60    8.17
   5  -2   5  340.01    7.93
   5   2   5  367.46    8.42
   5   2   5  378.12    8.21
  10   0   0  943.30   12.33
   5   5  -5  145.77    5.73
   5   5  -5  123.39    5.99
   5   5  -5  131.63    5.85
  -5   5   5  164.85    5.36
  -5   5   5  134.50    5.37
  -5   5   5  137.87    5.05
   5  -5  -5  155.37    5.19
   5   5  -5  135.19    5.52
   5   5  -5  110.86    4.65
   5   5  -5  130.79    5.65
  -3   4  -5 1562.23   16.59
  -3   4  -5 1573.16   18.05
  -3   4  -5 1570.39   18.33
   3   4   5 1557.40   13.92
   3   4   5 1601.13   15.94
   3   4   5 1553.93   16.22
   3   4   5 1514.80   14.43
   9  -1  -6  735.61   10.05
   9  -1  -6  735.59   11.21
   9   1  -6  775.28   11.96
   9   1  -6  771.04   13.88
   9  -1  -6  778.61   12.11
   9   1  -6  770.36    9.63
   9   1  -6  726.18   11.87
   5   6   0 1699.14   18.71
  -5   6   0 1720.38   16.85
  -5   6   0 1654.80   16.21
   5   6   0 1630.29   18.26
   5   6   0 1603.75   17.21
   5   6   0 1685.12   17.50
   5   6   0 1678.28   16.71
  -5   6   0 1663.15   19.16
  -5   6   0 1650.27   16.85
   3   5   4 4349.58   23.74
  -3   5  -4 4598.39   28.83
  -3   5  -4 4119.51   29.07
  -3   5  -4 4275.93   29.95
  -3   5  -4 4126.85   21.64
  -3   5  -4 4363.39   29.99
   3   5   4 4188.65   26.22
   3   5   4 4317.03   24.88
   3   5   4 4323.78   29.50
   2   6   3    4.58    2.15
  -2   6  -3   -0.04    2.90
   2   6   3    1.23    1.95
  -2   6  -3   13.03    3.51
   2   6   3    1.49    2.33
  -2   6  -3    9.19    2.81
   2   6   3    0.37    3.30
   2   6   3    5.14    2.88
  -2   6  -3    9.09    3.18
   5   3  -7  890.57   11.86
   5   3  -7  857.75   13.20
  -5   3   7  835.50   11.82
   5  -3  -7  821.20   12.25
   5   3  -7  849.70   12.25
   5   3  -7  882.64   13.42
   2   6  -414997.80   57.08
   2   6  -414300.80   46.79
   2   6  -414547.80   52.57
  -2   6   415036.80   53.84
   2   6  -414644.60   54.61
   2   6  -414729.10   53.90
  -2   6   414627.10   52.31
  -2   6   414693.10   49.50
  -2   6   414613.00   50.55
   2   6  -414866.60   53.33
  10   0  -5    8.71    2.58
  10   0  -5    1.08    3.21
   8   0   3    0.99    2.75
   8   0   3   -0.68    1.85
   8   0   3    0.83    2.05
  -6   4  -3  786.43   11.16
   6   4   3  716.02   12.39
  -6   4  -3  755.39   13.34
   6   4   3  760.45   11.36
  -6   4  -3  727.51   12.99
  -6   4  -3  759.21   11.01
   6  -4   3  701.62    9.70
   7   5   0  819.26   13.27
   7   5   0  772.11   12.63
   7   5   0  816.83   10.95
   7   5   0  853.65   14.34
   7   5   0  822.11   12.38
  -7   5   0  823.66   10.72
   7  -5   0  795.00    9.68
  -7   5   0  820.70   11.04
  -7   5   0  782.76   13.77
   1   3  -7 2640.44   22.17
  -1   3   7 2689.96   20.79
   1   3  -7 2613.47   20.15
   4   0   6  150.68    6.16
  -1   6   4 2827.10   19.81
  -1   6   4 2801.28   22.35
  -1   6   4 2779.68   21.03
   1   6  -4 2678.29   22.13
   1   6  -4 2729.85   21.83
   1   6  -4 2755.06   23.89
   1   6  -4 2692.75   21.82
   1   6  -4 2665.29   20.24
  -1   6   4 2783.47   20.76
  10   2  -110187.90   36.66
  10   2  -110320.40   46.01
  10   2  -110362.30   46.17
  10  -2  -110259.20   43.01
 -10   2   110287.70   40.46
   7   4   2 1343.66   17.12
  -7   4  -2 1430.15   13.96
   7  -4   2 1374.95   13.82
  -7   4  -2 1471.14   19.21
   7   4   2 1470.93   19.08
   7   4   2 1488.90   15.77
   7   4   2 1421.52   15.14
  10   2  -4 1144.07   14.94
  10  -2  -4 1096.37   13.55
  10   2  -4 1121.29   14.36
   7   0   4 6027.82   33.27
   7   0   4 5895.08   29.72
  10  -1   0  919.52   12.51
  10   1   0  919.59   12.40
  10   1   0  934.02   11.81
   7   2  -7 4319.21   29.78
   7   2  -7 4245.43   29.98
   7  -2  -7 4239.01   25.06
   7   2  -7 4342.53   25.82
   7  -2  -7 4348.15   27.60
   7   2  -7 4259.13   26.98
  -7   2   7 4340.26   26.90
  -7   2   7 4271.59   24.87
   7   3   3 1216.30   13.09
   7  -3   3 1213.01   13.98
  -7   3  -3 1240.25   13.47
  -7   3  -3 1268.68   16.07
   7   3   3 1215.47   15.38
  -7   3  -3 1307.67   17.27
   7   3   3 1168.46   12.75
   7   3   3 1263.88   14.17
   1   5   513354.70   47.65
   1   5   513109.10   44.57
   1   5   513428.60   50.46
  -1   5  -513263.80   54.47
  -1   5  -513354.30   46.45
  -1   5  -513489.00   54.65
  -1   5  -513070.60   47.94
  -1   5  -513162.10   51.25
   6   4  -6 2619.62   22.12
   6   4  -6 2715.20   23.19
   6  -4  -6 2582.94   20.61
  -6   4   6 2737.46   20.97
  -6   4   6 2676.27   21.40
  -6   4   6 2560.16   18.29
   6   4  -6 2620.53   21.06
   6   4  -6 2737.96   21.02
   6   4  -6 2738.41   23.07
  -3   6   4  140.28    4.99
   3   6  -4  103.60    4.86
   3   6  -4  128.60    5.88
   3   6  -4   90.27    5.31
  -3   6   4   91.16    4.50
   3   6  -4  104.45    5.40
   3   6  -4  100.15    4.67
  -3   6   4   93.91    4.69
  -3   6   4   92.75    4.63
   3   0  -8  540.53   10.02
  -3   0   8  539.30    9.20
   4   0  -818804.50   62.87
  -4   0   819113.20   56.92
   0   7   0   11.89    3.02
   0   7   0    1.13    2.41
   0   7   0    8.16    3.43
   0   7   0   -0.86    2.50
   0   7   0    2.67    2.40
   8   0  -7    2.00    2.77
   8   0  -7    0.21    3.86
   8   0  -7   -0.42    2.27
   8   0  -7   -0.35    2.68
   1  -2   7 2573.54   19.09
   1   2   7 2660.04   21.34
   1   2   7 2643.55   21.17
  -1   2  -7 2523.94   17.02
  -1   2  -7 2582.67   19.88
  10   1  -5 5356.42   25.52
  10   1  -5 5330.73   27.72
  10  -1  -5 5363.53   31.78
  10  -1  -5 5317.80   29.36
  10   1  -5 5306.63   30.61
   8  -1   3  154.76    4.13
   8   1   3  168.44    5.96
   8   1   3  164.13    5.00
   8   1   3  165.79    5.54
  -8   1  -3  180.62    5.26
   8  -1   3  172.35    6.09
  -5   6   3 3766.53   24.54
   5   6  -3 3857.01   26.65
  -5   6   3 3814.67   24.38
   5   6  -3 3789.64   24.64
   5   6  -3 3726.44   24.70
  -5   6   3 3672.48   26.13
   5   6  -3 3807.13   28.12
   5   6  -3 3671.31   26.14
   4   1   6 3823.58   26.87
  -4   1  -6 3891.48   28.27
   1   7   0 8581.73   35.83
  -1   7   0 8812.48   38.54
  -1   7   0 8522.71   35.07
   1   7   0 8541.63   37.39
   1   7   0 8933.75   42.89
  -1   7   0 8832.66   39.76
  -1   7   0 8541.76   42.05
  -1   7   0 8663.48   35.76
   1   7   0 8849.58   38.96
   1   7   0 8680.37   37.99
   1   7   0 8583.27   35.86
   2   0   7    2.25    3.06
   9   0   2 2945.19   22.85
   0   6  -410491.70   47.80
   0   6  -410516.20   43.39
   0   6   4 9842.91   36.83
   0   6  -410168.50   42.15
   0   6  -410252.00   44.34
   0   6  -410041.80   44.21
   0   6   410180.40   41.38
   0   6   410360.50   42.11
   0   6   410022.90   45.40
   8  -3   2 1499.25   15.53
  -8   3  -2 1424.79   18.18
   8   3   2 1506.01   15.08
   8   3   2 1519.07   17.87
   8   3   2 1464.96   15.45
   8   3   2 1459.80   13.43
  -1   4  -6  576.11   11.56
   1   4   6  583.81    9.32
  -1   4  -6  585.19    8.82
   1   4   6  579.70    9.00
   1   4   6  569.85    8.56
   1   4   6  571.48    8.87
  -1   4  -6  577.29   10.95
   7   1   4   44.05    3.29
   7   1   4   44.55    3.98
   7  -1   4   45.94    4.15
   7   1   4   42.54    3.13
   7  -1   4   38.02    2.97
  -7   1  -4   44.69    3.15
  -7   1  -4   32.56    3.42
   0   7  -1 1246.12   13.83
   0   7  -1 1168.58   11.60
   0   7  -1 1187.68   13.84
   0   7  -1 1216.70   15.44
   0   7   1 1173.77   15.13
   0   7  -1 1234.84   13.24
   0   7   1 1182.81   14.17
   0   7   1 1183.79   13.27
   0   7  -1 1170.09   15.34
   0   7   1 1268.87   14.51
   0   7   1 1230.08   13.55
   6   3   4 1078.52   13.71
   6   3   4 1073.60   13.22
   6  -3   4 1063.32   12.81
  -6   3  -4 1081.02   15.19
  -6   3  -4 1025.43   13.06
  -6   3  -4 1110.00   14.89
   6   3   4 1044.36   12.53
  -1   7   1 9170.85   39.45
   1   7  -1 9149.95   44.19
   1   7  -1 9407.53   40.31
  -1   7   1 9093.62   42.01
  -1   7   1 9466.98   39.78
   1   7  -1 9047.09   38.79
  -1   7   1 9282.27   37.40
   1   7  -1 9390.30   37.49
  -1   7   1 9199.67   40.37
   1   7  -1 9052.53   35.37
   2   0  -8  459.46    8.62
  -2   0   8  478.98    8.91
   2   0  -8  457.08    8.93
  -5   0   8  766.12   10.45
   5   0  -8  745.11   10.89
   5   4   4    0.89    2.98
  -5   4  -4   -0.23    2.91
  -5   4  -4    1.89    3.14
   5  -4   4    1.13    1.79
   5   4   4   -0.07    1.71
  -5   4  -4    1.80    2.52
   5   4   4   -0.16    1.59
  -5   4  -4    0.46    2.93
   3  -1  -8  999.88   13.37
  -3   1   8 1074.51   12.91
   3   1  -8 1002.64   12.97
   3   1  -8 1079.09   12.95
  -3  -1   8  979.47   11.11
   3   1  -8  930.35   11.08
   4   1  -8 1190.53   14.60
   4   1  -8 1267.52   14.58
  -4  -1   8 1260.37   12.49
   4  -1  -8 1213.72   14.86
  -4   1   8 1249.53   13.80
   8   1  -7 2810.08   22.20
   8   1  -7 2845.42   25.17
   8   1  -7 2768.13   19.52
   8  -1  -7 2892.10   20.52
   8  -1  -7 2762.11   20.76
   8   1  -7 2782.60   22.95
  -8   1   7 2622.42   19.89
   8   1  -7 2769.25   18.17
   8  -1  -7 2726.29   20.59
   8  -1  -7 2736.52   20.99
   9   3  -510846.10   46.16
  -9   3   510739.20   46.96
   9   3  -510594.70   47.56
   9  -3  -510851.30   43.63
   9   3  -510621.90   47.91
   9   3  -510742.70   45.80
   8   3  -6 2669.03   18.47
   8   3  -6 2617.25   19.78
   8   3  -6 2615.62   23.72
  -8   3   6 2644.15   21.87
   8  -3  -6 2648.87   21.48
   8   3  -6 2676.26   22.04
   7   5  -4   62.28    3.60
   7   5  -4   58.56    4.45
   7   5  -4   72.03    5.13
   7   5  -4   73.83    4.91
  -7   5   4   55.12    3.15
   7  -5  -4   60.84    3.53
  -7   5   4   59.65    4.37
   7   5  -4   60.83    4.12
   4   6   2 6397.94   31.55
   4   6   2 6338.84   33.27
  -4   6  -2 6378.84   35.53
  -4   6  -2 6295.51   37.98
  -4   6  -2 6388.39   33.09
  -4   6  -2 6312.83   26.86
  -4   6  -2 6440.20   33.04
   6  -3  -7    5.52    3.00
  -6   3   7    4.44    1.86
  -6   3   7    7.27    2.01
  -6   3   7    4.11    2.71
   6   3  -7   10.99    3.47
   6   3  -7    6.91    2.98
   6   3  -7    2.45    3.60
   9   4  -2 2846.78   19.23
   9   4  -2 2895.54   24.94
   9   4  -2 2888.69   24.47
  -9   4   2 2811.85   22.05
  -9   4   2 2798.67   22.33
   9   4  -2 2869.08   22.82
   9  -4  -2 2972.49   21.32
   9   4  -2 2892.06   20.61
   6   5   2 2468.12   17.33
  -6   5  -2 2616.00   23.90
  -6   5  -2 2368.48   23.79
  -6   5  -2 2565.14   18.30
   6   5   2 2499.75   18.60
   6   5   2 2407.82   23.16
   6   5   2 2664.50   21.34
   2  -1   7 1630.40   16.41
   2   1   7 1643.74   17.38
   2   1   7 1676.84   17.33
  -4   6   413166.10   47.69
  -4   6   413383.30   47.66
   4   6  -413032.60   47.64
   4   6  -413623.80   52.22
   4   6  -412983.20   50.47
   4   6  -413484.00   51.17
  -4   6   413391.20   49.75
  -4   6   413097.50   44.33
   9   1   2  383.37    8.15
   9   1   2  379.21    8.21
   1   7   1 3786.82   25.85
   1   7   1 3681.48   22.19
  -1   7  -1 3817.17   27.66
  -1   7  -1 3628.27   19.99
   1   7   1 3669.91   24.52
   1   7   1 3702.07   22.50
  -1   7  -1 3919.41   24.81
  -1   7  -1 3516.95   25.81
  -1   7  -1 3839.95   21.59
  -1   7  -1 3655.59   24.90
   1   7   1 3710.15   24.42
   8   4   115383.70   52.33
   8   4   115340.50   61.59
   8   4   115307.40   55.61
  -8   4  -115385.50   62.66
   8   4   115504.90   59.10
   0   3  -7 3298.58   21.24
   0   3  -7 3332.30   26.05
   0   3  -7 3327.23   24.29
   5   6   1 1335.61   17.07
   5   6   1 1298.85   13.68
  -5   6  -1 1324.49   13.10
   5   6   1 1346.51   16.76
  -5   6  -1 1429.16   17.84
  -5   6  -1 1331.63   15.59
  -5   6  -1 1408.32   14.46
  -5   6  -1 1284.83   12.58
   5   6   1 1370.25   14.32
   5   6   1 1381.75   15.38
   5   5   3  812.83   13.41
   5   5   3  911.28   12.21
   5   5   3  826.79   10.15
  -5   5  -3  819.15   13.79
  -5   5  -3  856.51   13.55
  -5   5  -3  849.44   11.84
  -5   5  -3  887.09   12.23
  -2   7   0 3532.23   23.94
   2   7   0 3474.85   23.79
  -2   7   0 3472.38   19.71
  -2   7   0 3294.17   20.85
   2   7   0 3540.72   24.25
  -2   7   0 3541.80   25.90
   2   7   0 3436.35   23.62
   2   7   0 3414.67   20.07
   2   7   0 3416.01   22.98
   2   7  -1    0.19    2.38
   2   7  -1   10.41    3.18
  -2   7   1    1.43    2.68
  -2   7   1    1.98    2.76
  -2   7   1    4.99    2.03
   2   7  -1    3.62    2.22
   2   7  -1    1.30    1.81
  -2   7   1    2.95    2.81
   2   7  -1    5.64    3.30
   2   7  -1    2.18    2.77
  -2   7   1    4.66    2.70
   2   1  -8  106.87    4.75
   2  -1  -8  116.21    5.11
   2   1  -8  113.56    4.52
  -2  -1   8  105.98    4.21
  -2   1   8  108.18    4.79
   2   1  -8  100.67    4.43
   2  -1  -8  109.72    4.52
   9  -2  -6 1497.16   15.59
   9   2  -6 1491.89   16.78
   9   2  -6 1495.81   16.49
   9   2  -6 1467.79   18.06
   5   1  -8 1500.12   16.22
   5   1  -8 1433.87   15.67
   5  -1  -8 1458.28   15.69
  -5  -1   8 1454.02   13.00
   5  -1  -8 1423.51   15.86
   5   1  -8 1445.17   13.55
  -5   1   8 1516.15   15.33
  -6   5   5 6678.52   34.75
   6  -5  -5 6330.99   31.15
  -6   5   5 6364.39   29.59
  -6   5   5 6622.94   31.89
   6   5  -5 6628.60   35.17
   6   5  -5 6364.15   35.30
   6   5  -5 6433.38   34.59
   6   5  -5 6586.36   36.08
  -6   5   5 6522.12   27.95
   6   5  -5 6666.38   32.48
  -6   0  -5    0.48    2.12
   6   0   5    0.73    2.77
   6   0   5    0.46    2.75
  -9   4   3 1175.72   14.86
   9  -4  -3 1234.66   13.64
   9   4  -3 1242.41   16.41
   9   4  -3 1174.65   13.32
   9   4  -3 1241.60   13.14
   9   4  -3 1238.17   16.12
   9   4  -3 1236.29   13.75
   8   4  -5 1382.53   16.36
   8   4  -5 1440.08   17.11
   8   4  -5 1321.96   12.30
   8   4  -5 1422.90   16.22
   8  -4  -5 1388.65   15.10
  -8   4   5 1371.07   15.96
   6   6  -1   58.27    4.21
   6   6  -1   58.92    4.62
  -6   6   1   53.57    3.65
   6   6  -1   59.57    4.72
   6   6  -1   59.26    4.25
   6   6  -1   63.26    4.16
  -6   6   1   58.06    3.67
  -6   6   1   76.67    4.28
  -6   6   1   62.28    4.28
   3   3   6   32.35    3.35
   3  -3   6   31.21    2.67
   3   3   6   29.02    2.28
  -3   3  -6   35.98    3.63
   3   3   6   33.70    3.30
   6   6  -2 3229.12   21.72
   6   6  -2 3298.13   24.46
  -6   6   2 3175.09   24.47
  -6   6   2 3119.71   22.16
   6   6  -2 3209.24   22.02
   6   6  -2 3113.25   25.28
  -6   6   2 3196.77   22.18
  -6   6   2 3336.62   21.97
   6   6  -2 3270.48   24.61
   3   6   3  200.06    5.92
   3   6   3  205.18    4.92
  -3   6  -3  196.37    6.68
   3   6   3  174.88    4.88
   3   6   3  212.56    6.11
  -3   6  -3  224.29    6.71
   3   6   3  191.41    7.08
  -3   6  -3  207.72    7.13
  -3   6  -3  195.22    6.58
  11   0  -3    2.80    2.13
  11   0  -3    5.45    2.42
  11   0  -3    0.09    2.34
  10   2   014984.20   55.86
  10   2   015148.10   55.86
  10  -2   015019.20   53.09
  10   2   015148.40   56.90
   9   4  -1 2630.33   22.95
   9   4  -1 2515.87   23.35
   9  -4  -1 2539.15   19.42
  -9   4   1 2612.65   22.82
   9   4  -1 2612.39   19.37
  -9   4   1 2570.15   19.46
   9   4  -1 2545.10   22.56
  -1   6  -4 3202.47   23.31
   1   6   4 3175.40   24.38
  -1   6  -4 3267.41   24.23
   1   6   4 3301.76   22.34
  -1   6  -4 3221.56   22.04
   1   6   4 3138.51   19.42
   1   6   4 3317.73   21.86
  -1   6  -4 3303.68   25.93
  -1   6  -4 3174.39   24.32
   1   0  -8   17.48    3.01
   1   0  -8   25.77    3.08
   6   0  -810507.50   43.35
   6   0  -810432.90   40.48
  10   3  -2 1011.66   10.30
  10   3  -2  991.02   14.13
  10   3  -2 1054.81   11.03
 -10   3   2 1069.72   13.75
  10  -3  -2 1125.67   13.37
  10   3  -2 1075.00   14.68
 -10   3   2 1096.12   13.45
  10   3  -2 1100.47   13.97
  10   3  -3 6987.90   32.59
  10  -3  -3 6748.31   34.08
  10   3  -3 6911.76   36.98
  10   3  -3 7032.59   33.76
 -10   3   3 7055.15   36.51
  10   3  -3 7252.50   38.32
  -1   7   2  179.62    5.49
   1   7  -2  189.35    5.89
  -1   7   2  177.50    5.78
  -1   7   2  176.96    5.74
  -1   7   2  182.28    6.16
   1   7  -2  185.96    6.85
   1   7  -2  170.91    4.96
  -1   7   2  183.57    6.12
   1   7  -2  191.81    6.85
  11   0  -2 5438.86   26.64
  11   0  -2 5726.81   29.25
   6  -1   5  487.40    8.76
   6   1   5  505.58    9.00
   6  -1   5  498.74    9.61
  -6   1  -5  479.70    9.01
   6   1   5  506.33    9.90
  -7   5  -1 9036.21   45.98
   7   5   1 8929.46   39.88
   7   5   1 8748.99   33.85
   7   5   1 9044.43   45.87
   7   5   1 9100.43   44.63
  -7   5  -1 9355.36   36.98
   7   5   1 9646.34   42.16
  10   2  -5 1073.28   12.93
  10  -2  -5 1028.42   12.79
  10  -2  -5 1102.70   13.98
  10   2  -5 1044.90   14.52
  10   2  -5 1109.73   14.30
  10   2  -5 1042.03   13.75
   8   2   3  827.57   11.34
  -8   2  -3  844.18   12.26
   8   2   3  841.13   10.78
  -8   2  -3  879.09   13.71
   8  -2   3  843.92   11.96
   8   2   3  863.50   12.38
   8   5  -2  648.74    9.43
   8   5  -2  711.85   12.67
  -8   5   2  708.06   11.54
   8   5  -2  680.45   10.65
  -8   5   2  658.54    8.45
   8   5  -2  651.45   10.57
   8   5  -2  720.14   12.52
  -8   5   2  683.69   10.76
   8  -5  -2  675.47    9.29
   9   3   1 2526.49   23.31
   9   3   1 2463.24   22.39
   9   3   1 2486.23   18.19
   9   3   1 2534.19   21.29
   9  -3   1 2602.57   20.00
  -9   3  -1 2443.93   23.46
   0   7   2 8464.24   36.32
   0   7   2 8563.05   40.25
   0   7   2 8520.56   36.97
   0   7  -2 8244.59   35.21
   0   7  -2 8996.67   42.15
   0   7  -2 8756.49   37.06
   0   7  -2 8431.53   41.55
   0   7   2 8759.20   37.85
   4  -2   6  286.05    7.02
  -4   2  -6  286.32    6.68
   4   2   6  307.27    7.51
   4   2   6  293.50    7.53
  -2   5  -5 1466.73   17.09
   2   5   5 1452.99   15.57
  -2   5  -5 1462.84   17.36
  -2   5  -5 1425.87   12.76
  -2   5  -5 1431.62   15.76
   2   5   5 1419.21   14.07
   2   5   5 1449.35   14.07
  -3   5   6  310.18    6.31
   3   5  -6  300.95    7.56
   3   5  -6  335.23    8.26
  -3   5   6  309.87    6.50
   3   5  -6  310.10    7.40
   3  -5  -6  317.69    6.68
   3   5  -6  302.39    6.33
  -3   5   6  321.71    7.38
   3   5  -6  305.40    7.78
  -2   7  -1  144.35    6.10
   2   7   1  133.75    5.07
  -2   7  -1  149.10    5.40
   2   7   1  119.24    5.10
  -2   7  -1  134.18    4.91
   2   7   1  129.17    4.67
   2   7   1  129.96    4.16
  -2   7  -1  128.96    5.46
  -2   7  -1  128.39    3.92
   2   7   1  124.60    5.51
   7   4  -6 3953.97   27.68
   7   4  -6 3978.27   23.97
   7   4  -6 3873.86   27.92
  -7   4   6 3847.71   20.28
  -7   4   6 3949.14   25.50
   7   4  -6 4032.16   26.71
   7  -4  -6 3996.91   25.68
   7   4  -6 3963.27   25.24
   2   7  -2 5732.69   30.63
   2   7  -2 5966.11   31.68
   2   7  -2 5731.82   33.87
  -2   7   2 5751.58   30.30
   2   7  -2 5637.17   33.31
  -2   7   2 5860.31   30.87
   2   7  -2 5691.04   25.82
  -2   7   2 5675.12   27.57
  -2   7   2 5757.68   30.48
  -2   7   2 5873.41   30.51
   2  -5  -6  829.95   10.40
   2   5  -6  862.57   12.13
   2   5  -6  852.52   12.86
   2   5  -6  848.84   12.63
  -2   5   6  854.50   10.46
  11   1  -3  547.36    8.72
  11   1  -3  555.99    9.93
 -11   1   3  545.32    8.66
  11   1  -3  526.84    8.91
  11  -1  -3  546.30    9.19
  11   1  -3  553.64    8.22
   5   3   5   56.12    3.89
   5   3   5   52.87    3.40
  -5   3  -5   67.24    4.26
  -5   3  -5   60.81    4.04
   5   3   5   51.39    3.57
  -5   3  -5   67.30    4.38
   5  -3   5   54.12    3.49
   7  -2   4 1966.37   14.52
   7   2   4 2118.42   18.57
   7  -2   4 2154.69   19.00
  -7   2  -4 2140.87   18.56
   7   2   4 2066.30   17.59
  -7   2  -4 2065.21   17.30
  -7   2  -4 2187.40   20.71
   7   2   4 2034.05   15.52
   7   2   4 2139.41   17.37
  10   0   1   -1.21    2.64
   1   1  -8  296.73    7.54
  -1  -1   8  351.24    7.20
   1  -1  -8  341.86    7.42
   1  -1  -8  299.72    7.23
  -1   1   8  346.32    7.93
   1   1  -8  333.33    7.02
  -6  -1   8 4778.65   23.65
  -6   1   8 4960.25   27.10
   6   1  -8 4843.27   24.58
   6  -1  -8 5040.25   28.39
   6   1  -8 5017.75   29.06
   6   1  -8 4962.56   30.27
   6   1  -8 5224.45   32.28
   6   1  -8 4885.42   24.04
   6  -1  -8 5148.47   29.40
   3   7  -1   27.02    3.05
  -3   7   1   23.73    3.10
   3   7  -1   21.39    2.63
  -3   7   1   24.94    3.39
  -3   7   1   31.19    3.41
   3   7  -1   30.93    3.35
   3   7  -1   24.65    3.36
  -3   7   1   21.46    2.95
   3   2  -8 1056.41   12.94
  -3   2   8 1069.72   13.22
   4   2  -8    5.26    2.97
  -4   2   8    1.77    2.63
   4   2  -8    0.14    2.85
  -4   5  -4    5.33    2.93
   4   5   4    1.39    2.54
   4   5   4    1.64    1.55
   4   5   4    5.73    2.21
  -4   5  -4    6.60    3.41
  -4   5  -4    2.46    3.09
  -4   5  -4    4.36    2.95
   4   5   4    6.67    3.25
  11  -1  -2 3700.94   22.16
  11   1  -2 3710.15   25.34
  11   1  -2 3701.28   21.07
  11  -1  -2 3751.87   24.07
  11   1  -2 3723.12   21.52
   8   2  -7 1178.97   12.45
   8  -2  -7 1097.23   12.65
  -8   2   7 1068.36   12.61
   8   2  -7 1117.69   15.80
   8   2  -7 1103.61   13.77
   8  -2  -7 1085.90   13.37
   8  -2  -7 1136.17   12.54
   8   2  -7 1171.29   15.10
   8   5  -1 7032.04   38.68
  -8   5   1 7157.46   33.90
  -8   5   1 6805.31   28.49
   8  -5  -1 7222.06   30.17
   8   5  -1 7384.27   34.88
   8   5  -1 7000.77   36.68
   8   5  -1 7256.66   39.61
  -8   5   1 7226.71   37.74
  11   0  -4  150.68    4.93
  11   0  -4  146.62    4.74
  11   0  -4  150.12    5.60
   6   6   0 9890.57   42.57
   6   6   010098.90   40.85
  -6   6   010032.80   38.84
   6   6   0 9900.49   45.46
  -6   6   0 9880.94   42.65
   6   6   0 9969.26   46.04
  -6   6   0 9943.90   46.41
  -6   6   010187.50   39.32
   6   6   010218.70   43.19
  -8   5   3  537.71    7.44
   8   5  -3  588.99    9.89
   8   5  -3  550.73    8.48
  -8   5   3  600.47   10.77
   8   5  -3  564.32   10.76
   8  -5  -3  561.72    8.69
   8   5  -3  566.09    9.63
   8   5  -3  513.16   10.98
  -5   6   4 3913.43   24.06
   5   6  -4 4059.74   27.92
  -5   6   4 3978.78   26.27
  -5   6   4 3853.51   20.24
   5   6  -4 3755.02   23.56
   5   6  -4 3883.16   23.77
   5   6  -4 3793.55   26.43
   5   6  -4 4100.10   25.35
  -5   6   4 3529.12   23.10
  -3   7   0 3701.01   21.53
  -3   7   0 3802.73   24.24
  -3   7   0 3825.38   26.96
   3   7   0 3752.04   24.84
   3   7   0 3886.75   24.48
   3   7   0 3978.95   25.62
  -3   7   0 3931.06   24.96
   3   7   0 4033.97   25.69
  -9   4   4 2214.34   20.12
   9   4  -4 2059.70   21.36
   9   4  -4 2235.99   21.26
   9   4  -4 2310.58   19.61
   9  -4  -4 2258.37   18.29
   9   4  -4 2133.61   19.09
  -4   4  -5   22.27    3.26
   4   4   5   17.18    2.32
  -4   4  -5   27.96    3.83
   4   4   5   17.59    2.05
   4   4   5   19.48    2.99
  -4   4  -5   19.52    3.45
   4   4   5   21.19    2.98
  -6   6   3 2977.14   21.34
   6   6  -3 3121.96   23.21
   6   6  -3 2992.78   22.45
  -6   6   3 2961.26   20.40
  -6   6   3 3005.11   23.34
   6   6  -3 3169.44   24.98
   6   6  -3 2990.44   22.66
   4  -5  -6  421.74    7.87
   4   5  -6  420.14    8.58
   4   5  -6  393.25    7.92
  -4   5   6  405.91    6.85
   4   5  -6  441.83    9.42
   4   5  -6  396.65    7.79
   4   5  -6  426.55    9.04
  -4   5   6  420.94    7.34
  -4   5   6  442.44    8.30
  -4   5   6  385.30    7.44
   3   4  -7  805.40   11.59
   3   4  -7  876.13   12.92
   3   4  -7  831.20   11.40
   3   4  -7  838.59   10.13
   3  -4  -7  866.69   11.68
   3   4  -7  814.69   11.39
  -3   4   7  851.37   11.18
 -10   3   1   40.64    3.04
  10   3  -1   42.19    2.66
 -10   3   1   46.97    4.28
  10  -3  -1   44.17    3.62
  10   3  -1   45.42    4.34
  10   3  -1   46.81    4.28
  10   3  -1   40.95    4.02
  10   0  -6 1365.16   15.52
  10   0  -6 1366.25   13.31
  -2   2  -7 1112.12   15.06
   2   2   7 1143.00   13.95
   2  -2   7 1145.81   12.65
  -2   2  -7 1093.32   12.08
   9  -2   2  423.16    8.50
  -9   2  -2  414.85    9.79
   9   2   2  436.53    9.15
   9   2   2  407.27    7.66
   9   2   2  427.36    7.37
   2   4   6   19.84    2.61
  -2   4  -6   24.83    3.72
   2   4   6   22.48    2.36
   2   4   6   21.09    2.54
   2   4   6   26.58    2.85
  -2   4  -6   17.69    4.05
   1   7   2  375.05    8.51
   1   7   2  339.31    6.31
   1   7   2  363.95    7.08
   1   7   2  411.41    7.77
  -1   7  -2  352.06    6.59
  -1   7  -2  428.47    7.77
  -1   7  -2  374.05    8.70
   1   7   2  368.92    7.84
  -1   7  -2  360.49    8.83
  -1   7  -2  329.06    7.33
   1   5  -6  114.01    5.39
  -1   5   6  104.43    4.17
   1  -5  -6   98.62    3.98
   1   5  -6  100.58    5.22
  -1   5   6   97.57    3.76
   1   5  -6   95.59    4.52
  -1   5   6   97.88    4.49
  10   3  -4   31.94    3.81
  10   3  -4   32.72    2.77
  10   3  -4   41.20    4.12
  10   3  -4   30.92    3.55
  10  -3  -4   31.41    3.46
 -10   3   4   42.90    4.02
  10  -1   1   30.70    3.45
  10   1   1   31.28    3.22
   4   4  -7 2390.68   20.14
   4   4  -7 2383.64   20.15
   4   4  -7 2478.61   21.74
   4  -4  -7 2459.63   19.43
   4   4  -7 2511.84   18.59
  -4   4   7 2472.02   18.60
   7   3  -7 6585.55   36.17
   7  -3  -7 5943.58   27.46
   7   3  -7 6291.28   31.19
   7  -3  -7 6409.63   32.38
   7   3  -7 6143.46   32.22
   7   3  -7 6307.95   35.96
  -7   3   7 6182.74   29.08
   2   2  -8    2.32    2.63
  -2  -2   8    1.46    1.54
  -2   2   8    3.88    2.65
   2   2  -8    2.76    2.40
   2   2  -8    3.11    2.49
  -2   4   7   92.79    4.31
   2   4  -7   86.25    4.95
   2   4  -7   81.61    4.34
   2   4  -7   80.40    4.42
   2   4  -7   87.65    3.89
  -5   2   8  349.76    7.60
   5   2  -8  350.93    8.32
   5  -2  -8  333.70    7.85
   5   2  -8  336.07    7.72
   5   2  -8  354.62    8.69
  11   0  -1    1.14    2.23
  11   1  -4   15.29    2.15
  11   1  -4   15.79    2.75
  11   1  -4   13.76    2.61
  11  -1  -4   12.60    2.59
  11   1  -4   19.90    3.06
  11  -1  -4   14.21    3.12
  -3   7   2 1647.84   16.35
  -3   7   2 1583.28   15.14
  -3   7   2 1681.73   15.59
   3   7  -2 1695.41   17.17
  -3   7   2 1675.17   16.14
  -3   7   2 1587.85   12.98
   1   3   7  177.74    5.74
  -1   3  -7  170.10    5.76
  -1   3  -7  152.23    4.26
  -1   3  -7  159.65    6.32
   1   3   7  160.31    5.19
   9   0  -7    0.37    2.54
   9   0  -7    0.79    1.85
   9   0  -7    4.16    2.80
  10  -1  -6   12.83    2.75
  10   1  -6   11.31    1.93
  10   1  -6   10.87    3.52
  10  -1  -6   12.50    3.38
  10   1  -6   12.72    2.91
   0   0  -8 4856.42   24.14
   0   0  -8 4770.81   29.65
   9  -4   0 1273.27   13.21
   9   4   0 1351.85   15.76
   9   4   0 1342.29   16.21
   9   4   0 1346.13   16.94
  -9   4   0 1346.79   16.87
   9   4   0 1284.34   13.47
   7   0  -8   52.91    4.10
  -7   0   8   48.64    3.40
   7   0  -8   44.22    3.63
   7   0  -8   42.01    2.96
   7   0  -8   44.49    3.30
   7   0  -8   48.03    4.28
  -2   6  -4  613.61   10.65
   2   6   4  620.35    9.07
   2   6   4  612.14   10.71
   2   6   4  614.32    9.42
   2   6   4  600.79    8.73
  -2   6  -4  600.23   10.90
  -2   6  -4  631.06   11.09
  -2   6  -4  632.76   10.29
   3   0   7   -1.64    2.94
  -3   0  -7    1.46    3.43
  -2   6   5  616.51    9.48
   2   6  -5  589.16    9.04
  -2   6   5  627.12    8.39
   2   6  -5  554.72    7.98
   2   6  -5  606.21   10.14
  -2   6   5  610.61    9.83
  -2   6   5  619.76    9.81
   2   6  -5  606.24   10.25
   2   6  -5  573.82   10.41
  11  -1  -1   -0.48    2.49
  11   1  -1    1.85    2.16
  11   1  -1    5.31    2.20
 -11   1   1    0.71    1.79
  -6   2  -5 1457.10   15.66
  -6   2  -5 1366.16   14.89
   6  -2   5 1383.22   13.38
  -6   2  -5 1437.73   14.08
   6   2   5 1425.62   15.15
   6  -2   5 1418.65   14.99
   6   2   5 1443.90   14.54
   7   5  -5  964.63   13.36
   7   5  -5  998.00   11.38
   7  -5  -5  996.60   11.69
   7   5  -5  932.60   12.66
  -7   5   5  936.92   10.20
   7   5  -5  941.53   13.30
   7   5  -5  995.67   13.47
  -7   5   5  973.31   12.96
   5   5  -6  309.58    7.17
   5   5  -6  300.30    7.47
   5   5  -6  293.01    7.53
  -5   5   6  296.85    6.28
  -5   5   6  292.47    6.44
  -5   5   6  306.34    6.46
   5   5  -6  315.17    7.86
   5  -5  -6  294.34    6.57
   5   5  -6  284.85    6.15
   5   4  -7 1645.61   16.82
   5   4  -7 1674.90   17.84
   5   4  -7 1642.79   15.55
   5  -4  -7 1668.34   16.23
   5   4  -7 1609.31   16.06
  -5   4   7 1667.17   14.62
  -5   4   7 1609.81   15.60
   5   0   6 4104.28   27.47
   5   0   6 4111.11   25.92
   9  -1  -7  804.42   10.22
  -9   1   7  823.15   11.08
   9   1  -7  826.55    8.88
   9   1  -7  856.70   12.13
   9   1  -7  850.26   12.20
   9   1  -7  804.57    9.21
   9  -1  -7  800.14    9.17
   9   1  -7  885.65   13.72
   9  -1  -7  869.67   11.66
   9  -1  -7  825.50   11.24
  -3   6   5   95.59    4.19
  -3   6   5   97.93    4.52
  -3   6   5   96.13    4.48
   3   6  -5   99.28    4.87
  -3   6   5   87.84    3.69
   3   6  -5  102.10    4.76
   3   6  -5   90.00    4.92
   3   6  -5   92.97    4.78
   3   7   1  149.68    5.54
  -3   7  -1  183.34    5.80
   3   7   1  158.91    6.08
  -3   7  -1  193.00    5.79
   3   7   1  155.07    5.24
  -3   7  -1  146.09    4.37
  -3   7  -1  164.40    6.26
   3   7   1  137.45    5.17
  -3   7  -1  160.82    5.00
   1   4  -7  108.71    4.52
  -1   4   7  105.89    4.31
   1   4  -7  115.67    5.32
   1   4  -7  109.72    5.22
  -5   6  -2 5777.37   35.41
   5   6   2 5862.21   31.59
   5   6   2 5979.21   34.64
  -5   6  -2 5740.06   33.01
  -5   6  -2 5857.62   28.14
  -5   6  -2 6078.65   31.05
   5   6   2 5856.89   28.09
   8  -5   0 1600.89   13.13
   8   5   0 1637.02   18.77
  -8   5   0 1587.44   13.38
   8   5   0 1592.50   15.80
  -8   5   0 1636.92   18.39
   8   5   0 1644.35   17.79
   8   5   0 1576.22   17.01
   0   1  -8    0.99    1.97
   0   1   8    2.14    2.87
   0   1  -8    4.56    3.14
   0   1   8    1.15    2.77
   0  -1  -8    5.12    2.07
   0  -1   8    1.53    2.30
   0  -1  -8    2.11    2.78
   7   1  -8 1569.60   12.85
   7   1  -8 1667.60   15.52
   7  -1  -8 1640.47   16.18
  -7   1   8 1705.34   15.54
   7   1  -8 1513.57   13.69
   7   1  -8 1583.07   17.30
   7  -1  -8 1710.31   15.86
   7  -1  -8 1557.84   12.66
   7   1  -8 1610.60   17.34
   7  -1  -8 1716.09   16.29
  11   2  -3 1550.33   15.23
  11   2  -3 1487.53   13.97
  11   2  -3 1524.63   15.64
  11  -2  -3 1555.22   15.25
  11   2  -3 1554.20   16.55
  11  -2  -3 1520.30   15.22
 -11   2   3 1602.83   16.04
  -1   6   5   23.88    3.33
   1   6  -5   27.14    3.51
   1   6  -5   29.22    3.60
   1   6  -5   20.92    3.72
   1   6  -5   24.72    2.80
  -1   6   5   31.09    3.38
   1   6  -5   30.82    2.89
  -1   6   5   25.15    2.01
  -1   6   5   30.83    3.23
   0   5  -6 8724.24   40.91
   0   5  -6 8597.54   40.51
   0   5   6 8291.96   31.17
   0   5   6 8601.89   33.75
   0   5   6 8643.54   36.37
   0   5  -6 8408.14   35.08
  -4   7   1 1310.65   13.25
   4   7  -1 1285.53   13.11
   4   7  -1 1317.49   14.98
  -4   7   1 1306.30   14.19
  -4   7   1 1330.73   14.90
   4   7  -1 1320.85   14.58
   4   7  -1 1312.44   14.43
  -1   2   8  582.16   10.01
   1   2  -8  546.76    9.82
  -1  -2   8  539.61    7.28
   1   2  -8  581.02    9.11
   1  -2  -8  580.46    9.15
   1   2  -8  557.37    8.65
  -1   2   8  533.66    8.14
   6   2  -8 3523.51   20.58
   6  -2  -8 3628.58   23.75
   6   2  -8 3609.00   23.24
   6   2  -8 3531.20   26.28
   6   2  -8 3782.92   26.40
  -6   2   8 3710.06   23.07
  -7   4  -3  487.85    7.95
  -7   4  -3  461.55    7.04
  -7   4  -3  497.30   10.30
  -7   4  -3  491.39   10.09
   7  -4   3  465.83    7.62
   7   4   3  494.48    9.91
  -8   5   4 1607.97   12.26
  -8   5   4 1775.73   17.79
   8   5  -4 1739.05   18.53
   8   5  -4 1735.47   16.94
   8  -5  -4 1762.64   15.02
   8   5  -4 1697.85   15.69
   8   5  -4 1850.21   18.55
  -1   7   3 4044.80   26.23
   1   7  -3 3912.17   21.55
   1   7  -3 4209.51   28.26
   1   7  -3 4409.32   28.00
  -1   7   3 4118.19   24.03
   1   7  -3 3996.90   24.45
  -1   7   3 4192.76   24.90
  -1   7   3 4263.13   24.83
  -9   3   6 1089.98   13.94
   9   3  -6 1105.78   14.25
   9  -3  -6 1015.80   12.94
   9   3  -6 1033.98   14.62
   9  -3  -6 1142.95   13.56
   9   3  -6 1041.67   13.57
   9   3  -6 1017.30   11.54
  -3   1  -7 2374.78   21.20
   3  -1   7 2347.56   19.25
   2   7   2 1330.31   12.04
   2   7   2 1349.31   13.68
   2   7   2 1307.72   12.74
  -2   7  -2 1409.80   14.74
  -2   7  -2 1426.63   15.70
  -2   7  -2 1268.30   11.97
  -2   7  -2 1288.75   12.78
   2   7   2 1374.26   14.41
   2   7   2 1359.14   15.63
  -2   7  -2 1402.81   15.97
 -11   2   2   99.71    4.29
  11   2  -2  112.51    4.89
  11   2  -2  114.22    5.08
  11  -2  -2  108.27    4.76
  11   2  -2  106.63    5.14
 -11   2   2  102.53    4.65
  -2   7   3   89.53    4.25
  -2   7   3   98.01    4.52
   2   7  -3   85.79    5.12
   2   7  -3   94.16    4.95
  -2   7   3   80.88    4.50
   2   7  -3   80.65    3.28
  -2   7   3   88.74    3.95
  11   0  -5    3.97    3.08
  11   0  -5    0.29    2.05
  -5   1  -6  942.45   13.10
   5  -1   6  939.53   12.52
   5  -1   6  904.77   11.88
   5   1   6  934.30   12.45
   4   6   3  772.01   12.31
  -4   6  -3  759.28   11.87
   4   6   3  782.97   10.23
   4   6   3  746.36   10.76
  -4   6  -3  764.29   12.45
   6   6   1   23.38    2.93
   6   6   1   21.77    3.28
  -6   6  -1   21.68    3.24
   6   6   1   19.72    3.75
   6   6   1   24.38    4.23
  -6   6  -1   23.62    2.85
  -6   6  -1   19.98    3.93
   6   6   1   19.57    2.68
  -6   6  -1   21.56    2.00
  -4   7   0   58.12    3.49
  -4   7   0   69.98    3.97
  -4   7   0   59.10    4.27
   4   7   0   58.00    4.27
   4   7   0   57.46    3.88
   4   7   0   56.51    3.86
  -4   6   5  111.03    4.61
   4   6  -5  103.53    5.01
  -4   6   5  101.07    4.12
  -4   6   5  105.53    4.53
   4   6  -5  105.12    4.79
  -4   6   5   99.92    4.11
   4   6  -5  108.79    5.29
   4   6  -5  108.38    4.82
   0   7  -3 3139.51   20.91
   0   7   3 3051.31   22.89
   0   7  -3 3093.58   23.63
   0   7   3 3111.17   20.60
   0   7  -3 3119.32   20.28
   0   7  -3 3122.14   23.80
   0   7   3 3145.11   21.23
   0   7   3 3095.12   19.67
   8   4   2   70.88    3.70
   8  -4   2   70.86    3.56
   8   4   2   76.58    5.03
   8   4   2   68.56    3.88
  -8   4  -2   76.28    5.33
   4   7  -2 1439.88   14.95
  -4   7   2 1340.53   13.64
  -4   7   2 1363.32   13.39
  -4   7   2 1379.56   14.58
  -4   7   2 1463.00   14.95
  10   3   0  584.06   10.27
  10   3   0  595.79   10.72
 -10   3   0  519.91   10.48
  10   3   0  551.45   10.48
  10   3   0  504.42    7.34
  10  -3   0  524.79    9.09
  10   2   1  420.70    9.09
  10  -2   1  422.12    8.29
  10   2   1  380.69    8.12
 -10   2  -1  381.74    9.26
  10   2   1  396.46    6.15
  10   2   1  398.48    6.96
  -6   6   4  577.85    9.91
   6   6  -4  524.30    8.53
  -6   6   4  540.03    9.07
   6   6  -4  517.30    9.60
   6   6  -4  490.90    7.99
   6   6  -4  581.46   10.70
  -6   6   4  511.47    8.12
   6   6  -4  515.51    8.93
   6  -4   4   72.40    3.15
   6   4   4   76.51    4.37
  -6   4  -4   80.85    4.88
   6   4   4   84.25    4.30
  -6   4  -4   80.88    4.65
  -6   4  -4   72.94    3.85
  -3   5  -5  480.98    8.55
   3   5   5  504.68    7.56
   3   5   5  498.33    7.63
  -3   5  -5  497.83    9.25
   3   5   5  502.57    8.99
  -3   5  -5  494.89   10.06
  -3   5  -5  484.46    9.66
  -7   6   2   31.78    2.57
  -7   6   2   46.08    3.73
   7   6  -2   43.85    3.73
  -7   6   2   40.09    3.08
   7   6  -2   33.47    2.93
   7   6  -2   40.08    4.03
   7   6  -2   36.44    2.95
  -7   6   2   38.69    2.88
   7   6  -2   35.51    3.73
  11  -2  -4  750.41   10.70
  11  -2  -4  768.14   11.13
  11   2  -4  739.37   10.74
  11   2  -4  749.38   11.03
  11   2  -4  743.63    9.65
  11   2  -4  775.88   10.70
 -11   2   4  725.47   11.35
  -3   7   3   24.88    3.13
  -3   7   3   26.58    3.36
  -3   7   3   25.59    3.09
  -3   7   3   23.75    2.41
  11   1  -5 1391.82   11.11
  11  -1  -5 1430.78   15.46
  11   1  -5 1451.84   12.77
  11  -1  -5 1480.76   14.10
  11   1  -5 1394.72   13.93
  11   1  -5 1407.92   14.64
  10  -3  -5 5677.35   29.92
  10   3  -5 5940.34   33.42
 -10   3   5 5626.54   32.57
  10   3  -5 5650.21   31.36
  10   3  -5 5711.68   30.27
  10   3  -5 5938.37   31.09
   9   4  -5    8.11    3.26
   9  -4  -5    9.23    2.58
   9   4  -5    9.02    3.59
   9   4  -5    8.22    3.54
   9   4  -5    7.09    3.12
  -9   4   5    7.54    3.02
   8   3   3  587.44   10.04
   8  -3   3  564.96    9.04
  -8   3  -3  602.61   10.48
   8   3   3  550.80    7.85
   8   3   3  534.04    8.05
   8   3   3  585.36    8.96
  -8   3  -3  582.78   11.18
   8   4  -6  273.26    5.70
   8  -4  -6  284.53    6.79
   8   4  -6  258.46    6.46
   8   4  -6  270.52    7.64
   8   4  -6  257.87    7.31
  -8   4   6  284.07    6.93
   8   4  -6  294.08    7.75
  -7   6   1   77.11    3.87
  -7   6   1   62.22    3.63
  -7   6   1   69.46    3.37
   7   6  -1   87.00    4.38
   7   6  -1   76.63    4.70
   7   6  -1   71.16    4.76
   7   6  -1   69.15    4.13
  -7   6   1   73.89    4.33
   0   6  -5 1846.84   18.57
   0   6   5 1907.65   16.76
   0   6  -5 1911.90   17.96
   0   6  -5 1828.90   15.98
   0   6   5 1834.31   16.07
   0   6  -5 1792.11   15.96
   0   6   5 1917.12   16.30
   0   6  -5 1824.11   15.52
  -6   5  -3   98.75    5.40
   6   5   3  110.29    4.82
  -6   5  -3  109.09    5.56
   6   5   3  100.50    3.38
  -6   5  -3  116.56    4.63
   6   5   3  108.10    5.49
  -4   3  -6    7.82    2.57
  -4   3  -6    4.28    2.81
   4   3   6    6.76    2.42
   4  -3   6   10.14    2.06
   4   3   6    5.58    2.54
  10  -2  -6 1963.86   17.12
 -10   2   6 1995.14   18.13
  10   2  -6 2028.75   19.45
  10   2  -6 2034.41   18.34
  10  -2  -6 2047.37   18.09
  10   2  -6 1981.10   18.24
   6   4  -7   18.64    3.29
   6   4  -7   21.32    3.22
  -6   4   7   17.43    2.04
  -6   4   7   18.13    2.25
   6   4  -7   21.26    3.89
   6  -4  -7   21.83    3.10
   6   4  -7   21.71    3.03
   8   0   4  381.28    6.44
  -8   0  -4  365.99    7.12
   8   0   4  385.47    8.22
   7   5   2 6797.31   29.20
   7   5   2 6654.36   25.37
  -7   5  -2 7278.54   38.64
   7   5   2 7184.74   37.92
  -7   5  -2 7390.46   38.33
  -7   5  -2 7230.07   30.83
   7   5   2 7230.63   34.19
   9   0   3    0.49    2.03
   9   0   3   -0.06    2.73
   7  -3   4   26.73    2.82
   7   3   4   34.04    3.15
  -7   3  -4   27.87    3.31
   7   3   4   29.93    2.72
   7   3   4   25.70    3.04
  -7   3  -4   24.28    3.50
  11   0   0   27.92    3.00
   0   4  -7   24.94    3.28
   0   4   7   17.08    1.92
   0   4   7   18.07    2.48
   0   4  -7   28.63    3.67
   0   4   7   21.02    2.57
   0   4  -7   18.80    2.57
   6  -5  -6   64.03    3.55
   6   5  -6   69.80    4.64
  -6   5   6   62.80    3.22
   6   5  -6   63.96    4.11
  -6   5   6   62.06    3.21
   6   5  -6   65.99    4.41
   6   5  -6   64.64    3.81
  -6   5   6   61.37    3.51
   3   3  -8  190.15    5.68
   3   3  -8  183.15    5.89
  -3   3   8  179.59    5.53
   3   3  -8  181.96    6.12
   3   3  -8  183.15    4.97
   4   3  -8  547.40    9.32
   4   3  -8  560.41    9.94
   4  -3  -8  564.75    9.52
  -4   3   8  561.94    9.20
   8   3  -7 5227.47   30.43
   8   3  -7 4966.76   30.71
  -8   3   7 4707.58   25.15
   8  -3  -7 5108.11   28.26
   8   3  -7 4792.66   27.91
   8   3  -7 4964.98   24.74
   8  -3  -7 4827.12   24.65
  11  -2  -1 1550.04   12.10
  11   2  -1 1690.00   16.40
 -11   2   1 1626.88   16.76
 -11   2   1 1445.89   12.31
  11   2  -1 1588.31   15.70
  11  -2  -1 1721.47   15.48
  11   2  -1 1653.56   17.34
   9  -2  -7  104.99    4.44
   9   2  -7   86.27    3.37
   9  -2  -7  104.72    3.51
   9  -2  -7  100.41    4.50
   9   2  -7  104.36    5.85
   9   2  -7  101.41    4.77
   9   2  -7   97.87    4.82
   7   6  -3 1003.14   13.13
  -7   6   3  985.72   12.83
  -7   6   3 1003.73   10.68
   7   6  -3 1022.73   12.06
   7   6  -3 1003.32   13.83
   7   6  -3 1033.67   12.78
  -1   7  -3  415.02    8.66
   1   7   3  454.63    8.96
   1   7   3  431.97    8.05
  -1   7  -3  428.64    9.02
  -1   7  -3  405.77    7.37
  -1   7  -3  399.12    6.58
   1   7   3  427.06    7.15
   1   7   3  436.91    7.30
  -1   0  -8 2288.85   20.18
   1   0   8 2434.67   18.84
   8   0  -8 4338.23   26.05
   8   0  -8 4299.19   26.04
   3   4   6  611.56    9.16
   3   4   6  552.23    8.06
  -3   4  -6  603.41   10.83
   3   4   6  563.51    7.25
  -3   4  -6  613.02   10.30
  -8   1  -4  759.35    9.40
   8   1   4  860.37   11.37
   8   1   4  800.77    9.16
  -8   1  -4  819.42   11.87
   8  -1   4  857.18   11.54
   8   1   4  817.11    9.65
   8  -1   4  781.43    8.04
   2   3   7   19.35    2.62
  -2   3  -7   19.51    2.77
   2   3   7   15.01    1.81
   9   3   2  489.90    8.58
  -9   3  -2  510.49   10.61
   9  -3   2  528.20    8.67
   9   3   2  510.35    8.00
   9   3   2  538.77    9.85
   9   1   3  388.00    7.50
   9  -1   3  408.03    8.11
   9  -1   3  353.63    5.98
   9   1   3  358.33    5.96
  -9   1  -3  364.21    6.60
   9   1   3  388.05    7.70
   0   2  -8  800.09   11.31
   0   2  -8  725.39    9.28
   0  -2  -8  773.98    9.31
   0   2  -8  732.56    8.71
   0   2   8  745.93    9.62
   0   2   8  814.92   11.19
   0  -2   8  714.86    8.42
   7  -2  -8 1967.26   17.07
   7   2  -8 1993.67   18.90
   7  -2  -8 1919.60   15.54
  -7   2   8 2073.15   17.78
   7   2  -8 1858.89   15.14
   7  -2  -8 1986.50   16.61
   7   2  -8 1942.49   18.72
   7   2  -8 2018.63   16.53
   1   5   6  629.71    8.42
   1   5   6  665.60    9.11
  -1   5  -6  690.67   11.09
  -1   5  -6  645.20    8.48
   1   5   6  603.25    7.79
  -1   5  -6  595.86   10.64
   1   5   6  615.19    7.32
  11   1   0 1495.66   13.55
  11  -1   0 1526.71   14.66
  10   4  -2 2039.36   19.12
  10   4  -2 1914.84   14.38
  10  -4  -2 1989.10   15.98
  10   4  -2 1989.86   17.37
 -10   4   2 1964.68   16.54
 -10   4   2 2028.38   16.79
  10   4  -2 2072.92   19.69
   5   6  -5  208.10    6.52
  -5   6   5  208.08    5.67
  -5   6   5  208.76    4.94
  -5   6   5  206.31    5.49
   5   6  -5  201.00    5.07
   5   6  -5  195.87    5.80
  -5   6   5  213.01    5.72
   2   3  -8   85.13    4.13
   2   3  -8   94.56    4.56
   2   3  -8   83.02    4.11
   2   3  -8   92.45    4.21
  -2   3   8   91.62    3.91
   5   3  -8  214.21    4.88
  -5   3   8  220.70    5.90
   5   3  -8  228.72    6.68
   5  -3  -8  214.47    6.08
   5   3  -8  223.63    6.28
   5   3  -8  227.52    6.87
   3  -2   7  584.64    8.76
   3   2   7  593.65    9.60
  -3   2  -7  577.60    7.62
 -10   4   3   59.48    3.87
  10   4  -3   54.02    3.33
  10  -4  -3   65.87    3.72
  10   4  -3   51.61    2.71
  10   4  -3   65.86    4.53
  10   4  -3   63.25    4.62
  10   4  -3   52.49    3.17
  -5   5  -4 1862.95   18.31
  -5   5  -4 1956.99   18.49
   5   5   4 1801.55   12.80
  -5   5  -4 1945.17   16.77
  -5   5  -4 1977.83   16.80
   5   5   4 1879.70   17.69
   5   5   4 2036.57   17.04
   3   6   4 7043.93   35.24
  -3   6  -4 7106.73   35.88
   3   6   4 6911.42   31.00
  -3   6  -4 7033.84   34.35
   3   6   4 6975.24   30.15
   3   6   4 7011.98   26.42
  -3   6  -4 6918.32   34.86
   4   7   1  387.39    7.77
   4   7   1  365.11    7.37
  -4   7  -1  377.75    8.59
   4   7   1  382.01    8.36
  -4   7  -1  353.38    6.43
  -4   7  -1  390.27    7.47
  -4   7  -1  354.74    6.74
  -4   7  -1  347.51    6.50
  -3   7  -2 1577.68   15.28
   3   7   2 1537.36   16.26
   3   7   2 1605.70   14.77
  -3   7  -2 1459.76   13.63
   3   7   2 1479.02   13.94
  -3   7  -2 1488.91   16.42
  -3   7  -2 1367.89   11.36
  -3   7  -2 1547.02   15.15
   3   7   2 1530.01   14.07
  -5   2  -6 1713.52   17.03
   5  -2   6 1770.86   15.81
  -5   2  -6 1735.07   13.42
   5   2   6 1750.17   16.29
  -4   7   3  387.78    7.54
  -4   7   3  414.45    7.74
  -4   7   3  397.53    7.86
   9   4   1  443.51    7.68
   9   4   1  463.01    9.83
   9  -4   1  429.42    7.41
   9   4   1  434.77    8.35
   9   4   1  455.41    9.37
  -9   4  -1  444.20    9.82
  -7   0  -5    1.50    2.06
  -7   0  -5   -1.01    2.41
   7   0   5    1.79    2.01
   7   0   5    0.89    2.80
   7   6   0 1638.27   15.69
  -7   6   0 1711.01   13.29
  -7   6   0 1722.35   17.76
  -7   6   0 1714.48   14.11
   7   6   0 1689.36   14.70
   7   6   0 1711.78   17.41
   7   6   0 1733.18   17.69
  -7   6   0 1655.13   15.89
   7   6   0 1795.58   16.39
   1  -1   8 1300.72   12.93
  -1   1  -8 1296.96   15.12
   1   1   8 1325.34   13.89
   8  -1  -8 2560.16   18.52
   8   1  -8 2647.01   20.78
   8   1  -8 2531.83   17.90
   8  -1  -8 2720.70   19.31
   8   1  -8 2632.49   17.60
   8   1  -8 2686.66   21.62
   8  -1  -8 2690.88   18.16
   8  -1  -8 2490.09   16.62
  10   0   2 1518.77   14.14
  10   0   2 1596.69   15.31
   9   5  -2 1656.79   15.38
  -9   5   2 1677.48   14.70
   9  -5  -2 1702.89   13.59
   9   5  -2 1758.98   18.30
   9   5  -2 1731.83   14.96
  -9   5   2 1700.41   15.59
   9   5  -2 1770.97   17.94
  -5   7   1  122.41    4.72
   5   7  -1  111.31    3.99
   5   7  -1  127.65    5.11
   5   7  -1  117.76    4.82
   5   7  -1  114.24    4.27
  -5   7   1  117.49    4.53
  -5   7   1  112.51    4.63
   5   7  -1  110.66    4.77
   5   4   5    0.12    1.48
  -5   4  -5    3.12    2.40
  -5   4  -5   -0.29    2.68
  -5   4  -5    1.77    2.49
   5   4   5    0.99    2.33
   5   4   5    1.53    2.12
  -8   5  -1  229.84    6.77
   8   5   1  234.05    7.26
   8   5   1  247.52    7.72
  -8   5  -1  208.81    4.72
  -8   5  -1  220.10    7.25
   8  -5   1  223.49    4.65
   8   5   1  228.82    6.09
   8   5   1  248.19    6.21
  -1   6  -5  322.79    7.98
  -1   6  -5  326.12    7.60
   1   6   5  348.46    7.04
  -1   6  -5  308.45    6.42
   1   6   5  325.79    6.54
  -1   6  -5  317.86    6.49
  -1   6  -5  311.46    6.95
   1   6   5  338.29    7.19
   6  -3   5  703.38    9.29
  -6   3  -5  734.11   10.31
  -6   3  -5  692.02   10.02
   6   3   5  751.96   10.11
   6   3   5  686.27    9.28
   6   3   5  654.73    8.33
   6  -3   5  659.94    8.00
   9   5  -3 1578.34   17.20
   9   5  -3 1623.84   17.24
   9   5  -3 1517.43   12.54
   9  -5  -3 1645.83   13.70
  -9   5   3 1695.49   16.43
   9   5  -3 1546.30   13.62
   9   5  -3 1648.65   14.52
   5   7  -2 2695.86   20.76
  -5   7   2 2513.43   18.94
   5   7  -2 2649.50   20.13
  -5   7   2 2396.83   16.76
  -5   7   2 2731.39   18.94
  -5   7   2 2531.90   17.96
  11   2  -5 1888.89   16.83
 -11   2   5 1944.04   17.60
  11   2  -5 1939.10   17.10
  11  -2  -5 1887.12   15.99
  11  -2  -5 1900.43   16.98
  11   2  -5 1879.64   15.38
  -8   5   5    6.97    1.47
   8   5  -5    8.25    2.00
  -8   5   5    5.91    2.83
   8  -5  -5    5.82    2.22
   8   5  -5    8.62    3.02
   8   5  -5    7.96    3.29
   8   5  -5   16.31    3.33
   7   1   5 1257.15   14.03
   7   1   5 1192.64   12.07
  -7   1  -5 1120.33   12.57
   7  -1   5 1270.79   13.83
   7  -1   5 1155.66   11.00
  -7   1  -5 1099.06   12.20
  10   0  -7    0.50    2.53
  10   0  -7    4.78    2.10
  10   0  -7   -0.42    1.76
 -10   4   1  420.86    8.48
 -10   4   1  390.53    6.48
  10   4  -1  408.83    9.18
  10  -4  -1  403.01    7.16
  10   4  -1  409.14    8.45
  10   4  -1  425.57    8.81
  10   4  -1  390.69    6.53
  10   1   2 2274.89   17.32
  10  -1   2 2319.38   18.40
  10   1   2 2308.94   17.95
  11   3  -3  474.44    7.03
  11   3  -3  522.34    8.50
  11   3  -3  505.85    9.13
 -11   3   3  505.68    8.71
  11   3  -3  524.34    9.53
  11  -3  -3  480.92    8.22
  10   4  -4   43.41    3.96
  10   4  -4   41.27    3.24
  10  -4  -4   38.74    3.06
 -10   4   4   44.41    3.62
   9   5  -1  579.09    8.76
  -9   5   1  578.42    8.11
  -9   5   1  550.29    9.50
   9   5  -1  563.76    9.64
   9   5  -1  564.46   10.13
   9  -5  -1  565.97    7.58
   1   3  -8  215.16    5.89
  -1   3   8  213.56    5.61
   1   3  -8  226.56    6.23
   1   3  -8  211.44    5.30
  -7   4   7 1112.31   10.83
   7   4  -7 1184.94   13.93
   7   4  -7 1212.15   14.79
   7   4  -7 1195.19   12.23
  -7   4   7 1039.95    9.03
   7  -4  -7 1002.51    9.08
   7  -4  -7 1240.34   13.35
   7   4  -7 1177.58   13.14
   6  -3  -8   27.79    2.30
   6   3  -8   30.02    3.52
  -6   3   8   29.07    3.22
   6   3  -8   30.18    3.32
   6   3  -8   29.26    2.62
   6  -3  -8   27.59    3.24
   6   3  -8   26.82    4.04
  -6   3   8   26.13    2.11
  -5   7   0 2160.54   16.60
   5   7   0 2106.07   17.75
  -5   7   0 2169.97   15.78
   5   7   0 2139.38   17.64
  -5   7   0 2101.31   18.51
  11   0  -6 5727.89   24.81
  11   0  -6 5609.47   23.97
  11   3  -2  493.26    9.17
  11  -3  -2  498.96    8.11
  11   3  -2  508.81    8.91
 -11   3   2  460.28    7.91
  11   3  -2  510.37    9.48
 -11   3   2  475.90    7.69
   2   7   3   67.81    4.29
  -2   7  -3   46.55    3.19
   2   7   3   60.09    2.88
   2   7   3   47.89    3.44
  -2   7  -3   66.81    4.47
  -2   7  -3   52.38    4.05
   2   7   3   47.72    2.60
  -2   7  -3   55.67    3.90
   2   7   3   42.71    2.79
   4   0   7    2.68    2.56
   4   0   7    6.59    2.88
  -4   0  -7    3.26    3.32
   2   7  -4  350.05    6.47
  -2   7   4  385.85    7.43
  -2   7   4  366.58    6.63
  -2   7   4  353.33    6.68
   2   7  -4  348.84    7.30
   2   7  -4  377.03    8.13
   2   7  -4  341.79    5.27
   2   7  -4  340.32    7.68
  -2   7   4  399.51    7.65
  -1   4  -7  181.82    6.24
   1   4   7  178.46    4.44
   1   4   7  187.47    4.89
  -1   4  -7  185.20    4.10
   1   4   7  204.33    4.83
  -1   4  -7  203.45    5.94
   7   6  -4  426.02    8.15
  -7   6   4  432.76    6.78
   7   6  -4  439.68    8.26
  -7   6   4  414.60    8.31
   7   6  -4  426.13    8.78
  10   1  -7 2520.84   18.87
  10  -1  -7 2520.38   17.51
 -10   1   7 2536.30   18.47
  10  -1  -7 2481.74   18.44
   1   7  -4 1445.08   13.21
  -1   7   4 1583.70   14.96
   1   7  -4 1501.55   14.69
   1   7  -4 1425.36   12.43
  -1   7   4 1495.27   13.56
   1   7  -4 1518.82   15.85
  -1   7   4 1433.69   11.90
  -1   7   4 1528.93   13.64
  12   0  -3    0.61    1.90
  12   0  -3    0.57    1.83
  12   0  -3   -0.02    2.02
  -8   2  -4  272.55    5.85
   8   2   4  279.70    6.33
  -8   2  -4  248.82    5.09
   8  -2   4  274.79    6.47
   8   2   4  253.38    5.56
  -8   2  -4  273.72    7.10
   8   2   4  278.90    5.87
   6   6   2 2164.41   17.54
  -6   6  -2 2168.67   19.88
   6   6   2 2185.65   19.35
   6   6   2 2146.36   15.19
  -7   5   6 1855.88   12.94
  -7   5   6 2015.25   16.05
   7   5  -6 2039.34   17.24
   7   5  -6 1966.81   15.19
   7   5  -6 2041.15   17.70
  -7   5   6 1891.86   12.46
   7   5  -6 2006.10   17.59
   7  -5  -6 2005.20   15.50
   9  -2   3  218.03    5.78
  -9   2  -3  199.35    6.55
   9   2   3  206.07    5.69
   9   2   3  201.31    5.32
   9   2   3  202.83    4.86
   9   2   3  192.21    4.97
  -9   2  -3  209.42    5.58
 -10   3  -1 2740.23   22.34
  10  -3   1 2730.97   18.84
  10   3   1 2695.36   19.65
  10   3   1 2736.91   21.30
  11   2   0 3018.76   21.65
 -11   2   0 2815.62   21.78
  11   2   0 2830.14   20.91
  11   2   0 2687.42   14.85
  11  -2   0 2924.76   19.86
   4   0  -9    4.48    2.24
  -4   0   9    3.63    2.09
   4   0  -9    2.64    2.53
  -5   6  -3 1958.68   18.42
  -5   6  -3 2011.75   17.94
   5   6   3 2204.32   17.41
  -5   6  -3 2177.12   16.90
   5   6   3 2104.03   18.94
   5   6   3 2046.47   14.63
  -5   6  -3 1979.58   15.16
  -3   7   4 3604.00   20.98
   3   7  -4 3665.08   23.69
  -3   7   4 3838.07   22.44
   3   7  -4 3430.48   19.04
  -3   7   4 3699.20   22.10
   3   7  -4 3580.09   22.74
  -3   7   4 3521.93   19.44
   6   6  -5   27.93    3.05
   6   6  -5   38.25    3.79
   6   6  -5   33.47    2.83
  -6   6   5   23.84    2.47
  -6   6   5   23.78    1.82
  -6   6   5   25.51    2.81
   6   6  -5   23.24    2.95
  11   1  -6 1329.69   12.98
  11  -1  -6 1302.12   12.31
  11  -1  -6 1340.51   13.90
  11  -3  -4  528.76    8.19
  11   3  -4  565.39    8.34
  11   3  -4  534.77    9.24
  11   3  -4  561.36    9.35
 -11   3   4  567.13    9.36
   4   1   7   18.44    2.88
   4   1   7   17.97    3.15
   4  -1   7   22.07    2.84
   4  -1   7   16.19    3.02
  12   0  -2 3190.70   19.01
  12   0  -2 3059.03   20.07
   3   0  -9    0.58    2.40
  -3   0   9    1.20    2.08
  -9   5   4 2968.88   21.50
   9   5  -4 2827.37   19.42
   9  -5  -4 2914.77   17.97
   9   5  -4 2881.95   22.14
   9   5  -4 2899.59   21.74
   4   5   5  593.69    6.40
   4   5   5  630.55    9.08
  -4   5  -5  664.85   10.65
  -4   5  -5  614.38    8.88
   4   5   5  653.05    9.08
  -4   5  -5  662.92    9.95
   4   5   5  600.99    7.10
  -5   7   3  198.62    5.42
  -5   7   3  188.08    5.47
   5   0  -9    0.48    2.52
   5   0  -9   -0.27    1.94
  -5   0   9    0.06    1.90
  -3   5   7 2369.61   15.85
   3   5  -7 2476.68   18.66
   3   5  -7 2596.74   20.45
  -3   5   7 2495.18   17.60
   3   5  -7 2514.73   17.70
  -3   5   7 2655.42   18.40
   3  -5  -7 2487.91   16.69
  12   0  -4  857.09    9.26
  12   0  -4  845.92    8.98
  12   1  -3  341.72    5.77
  12  -1  -3  358.13    6.67
  12   1  -3  371.13    7.23
  12   1  -3  343.79    5.35
 -12   1   3  362.29    7.15
  12  -1  -3  371.10    6.20
  12  -1  -3  371.62    6.46
  10   3  -6  135.18    5.23
 -10   3   6  144.43    5.28
  10  -3  -6  127.37    4.67
  10   3  -6  136.83    5.62
  10   3  -6  126.88    4.00
  10  -3  -6  141.72    5.04
  10   3  -6  138.95    5.18
   1  -2   8  477.19    6.63
   1   2   8  483.42    7.60
   8  -2  -8  390.95    6.94
   8   2  -8  418.19    9.01
   8   2  -8  406.03    8.30
   8  -2  -8  409.85    7.74
   8   2  -8  386.12    6.76
   8   2  -8  368.15    6.88
   0   7   4  153.96    4.56
   0   7  -4  147.20    5.49
   0   7  -4  156.90    4.79
   0   7   4  134.01    3.72
   0   7  -4  148.44    5.05
   0   7   4  157.52    4.85
   0   7   4  157.15    5.29
   0   7  -4  148.66    4.51
  -2   5  -6  533.39    9.23
   2   5   6  503.16    7.50
   2   5   6  477.37    7.08
  -2   5  -6  523.30    9.27
   2   5   6  463.46    6.64
   2   5   6  520.88    7.43
   4   5  -7   43.01    3.13
   4   5  -7   42.78    2.59
   4   5  -7   47.84    2.89
   4  -5  -7   38.83    2.84
   4   5  -7   44.33    3.70
   4   5  -7   50.31    4.01
  -4   5   7   37.74    2.84
  -4   5   7   46.40    3.13
  -4   5   7   43.93    3.13
  -4   1   9   23.30    2.78
   4   1  -9   21.65    2.07
  -4  -1   9   19.69    1.89
   4  -1  -9   21.59    3.03
   4   1  -9   23.97    3.00
   4  -1  -9   26.14    2.91
   9   4  -6  150.39    4.78
   9  -4  -6  165.92    5.02
   9   4  -6  155.63    5.34
   9   4  -6  154.61    5.81
  -9   4   6  150.17    5.01
   9   4  -6  160.89    5.62
  -2   5   7  183.47    4.38
  -2   5   7  212.83    5.50
   2   5  -7  211.85    6.22
   2   5  -7  184.31    5.50
  -2   5   7  192.02    5.28
   2  -5  -7  196.78    4.71
   2   5  -7  184.04    5.26
   6   0   6  297.70    6.38
  -6   0  -6  287.65    7.01
  11   3  -1 3009.88   21.64
  11  -3  -1 2747.96   15.67
  11   3  -1 2926.08   21.19
 -11   3   1 3011.11   21.25
  11   3  -1 3135.74   21.86
  11  -3  -1 2905.45   19.08
  -7   6  -1 1225.21   13.40
  -7   6  -1 1254.96   14.78
   7   6   1 1275.20   14.56
   7   6   1 1250.43   13.20
   7   6   1 1213.16   11.01
  12   1  -2  547.63    6.94
  12  -1  -2  513.72    6.29
  12   1  -2  568.43    9.09
  12  -1  -2  569.81    8.29
 -12   1   2  520.56    8.14
  -3  -1   9   11.86    1.92
   3   1  -9   14.01    2.62
   3   1  -9    9.85    1.95
  -3   1   9   13.86    2.64
  11   0   1    0.65    2.20
  11   0   1    0.56    2.43
   9  -3  -7 4269.91   23.84
   9  -3  -7 4232.91   22.20
   9   3  -7 3847.40   18.38
   9   3  -7 4343.55   26.10
   9   3  -7 4354.20   24.92
   9   3  -7 4452.40   27.68
  -9   3   7 4122.34   22.51
   9  -3  -7 3851.92   17.85
   2   0   8  397.41    7.80
   2   0   8  401.30    7.39
  -2   0  -8  379.09    7.97
  -8   6   2  124.28    3.80
   8   6  -2  155.99    5.77
   8   6  -2  147.84    5.60
  -8   6   2  146.60    4.72
   8   6  -2  150.23    5.03
   8   6  -2  134.65    4.16
  -8   6   2  147.38    4.09
  -8   6   2  132.05    3.47
   9   0  -8   51.05    2.61
   9   0  -8   44.72    2.60
   9   0  -8   49.00    3.14
   9   0  -8   46.21    3.31
   5  -1  -9 2611.51   18.62
   5   1  -9 2538.48   17.12
   5  -1  -9 2647.60   18.20
   5   1  -9 2443.30   14.21
  -5   1   9 2754.53   17.55
  -5  -1   9 2489.56   13.96
   5   1  -9 2754.67   21.14
   5   1  -9 2738.81   18.79
   4   7   2 6346.84   28.60
  -4   7  -2 6169.59   27.20
  -4   7  -2 6484.40   32.68
   4   7   2 6428.28   32.06
  -4   7  -2 6680.37   30.55
   4   7   2 6664.15   29.16
  -4   7  -2 6122.05   28.13
  -7   2  -5   50.35    2.57
  -7   2  -5   49.56    3.04
   7  -2   5   56.94    3.50
   7  -2   5   46.09    2.28
   7   2   5   54.72    3.18
   7   2   5   52.25    3.34
  -7   2  -5   46.14    3.18
   2   6   5 1596.74   13.30
  -2   6  -5 1616.84   15.44
  -2   6  -5 1530.92   13.21
   2   6   5 1610.09   14.34
  -2   6  -5 1639.64   14.59
   2   6   5 1551.37   12.22
   2   6   5 1476.93   11.65
  -2   6  -5 1564.20   15.69
  12  -1  -4    2.60    2.04
  12   1  -4    3.88    2.22
  12  -1  -4    7.45    2.39
  12   1  -4    3.00    1.95
  12   1  -4    3.84    1.71
  -3   6   6 3124.93   17.68
  -3   6   6 3138.75   19.78
   3   6  -6 3062.48   20.23
   3   6  -6 3057.43   20.41
   3   6  -6 3126.61   21.39
  -3   6   6 3116.59   19.11
  10   2   2 3646.75   23.07
  10   2   2 3393.42   16.50
 -10   2  -2 3520.03   24.55
  10  -2   2 3621.35   22.06
  10   2   2 3524.64   21.30
  10   2   2 3378.36   18.43
   2   0  -9   -0.65    2.12
  -2   0   9    3.51    2.02
  -4   7   4  989.11   10.97
  -4   7   4  975.32   10.88
  -2   6   6 1740.38   14.71
   2   6  -6 1775.70   15.90
   2   6  -6 1750.65   15.04
   2   6  -6 1696.50   15.49
  -2   6   6 1759.88   14.52
  -2   6   6 1679.57   12.91
   0  -3  -8    1.56    1.61
   0   3  -8    0.12    2.56
   0   3  -8    2.95    2.07
   0   3  -8    0.87    1.60
   0   3   8    1.87    2.18
   0   3   8    2.14    1.48
   0   3   8    0.97    1.68
   9   5   0    8.16    3.13
  -9   5   0    0.92    2.91
   9   5   0    1.53    1.99
   9   5   0    0.35    2.98
   9   5   0    0.80    2.70
   9  -5   0    1.60    1.55
   7  -3  -8 1482.24   14.17
   7   3  -8 1444.77   12.79
   7   3  -8 1499.18   13.53
   7   3  -8 1476.31   15.34
  10   4   0 3240.19   22.02
  10   4   0 3262.90   22.69
  10   4   0 3094.10   17.50
  10  -4   0 3207.11   18.82
  10   4   0 3133.39   23.24
 -10   4   0 3242.49   22.73
   6   0  -9    1.25    1.96
  -6   0   9    1.02    1.75
   6   0  -9    0.21    2.62
   6   0  -9    0.48    2.41
   5   7   1   73.14    3.84
   5   7   1   76.94    3.86
  -5   7  -1   72.32    3.26
   5   7   1   70.42    4.16
  -5   7  -1   72.55    3.64
  -5   7  -1   84.16    2.91
  -5   7  -1   81.90    4.43
  -3   3  -7 2262.06   15.64
   3   3   7 2274.97   16.15
   0   8   0 2400.49   17.50
   0   8   0 2372.37   14.50
   0   8   0 2360.11   15.75
   4   6   4  720.58    8.52
  -4   6  -4  724.98   10.65
  -4   6  -4  732.96    9.89
   4   6   4  693.57   10.17
   4   6   4  704.09    9.34
  -4   6  -4  710.36    9.72
   6   1   6  956.34   10.65
  -6   1  -6  921.79   11.58
   6   1   6  952.70   11.53
   6  -1   6  935.82   11.33
   6  -1   6  931.28   10.16
  -8   6   1 1154.53   12.19
  -8   6   1 1141.29   10.84
   8   6  -1 1209.96   12.59
  -8   6   1 1095.34   11.51
  -8   6   1 1130.50    9.74
   8   6  -1 1206.32   13.38
   8   6  -1 1169.12   12.51
   8   6  -1 1162.59   14.01
   5  -5  -7 5539.22   25.56
   5   5  -7 5710.25   27.49
  -5   5   7 5680.28   25.03
   5   5  -7 5566.47   25.37
  -5   5   7 5689.12   25.38
   5   5  -7 5659.33   26.62
   5   5  -7 5837.50   30.39
   5   3   6    0.41    1.93
  -5   3  -6    5.69    2.72
  -5   3  -6    5.09    2.07
   5   3   6    8.13    2.37
   5  -3   6   -0.49    1.61
  -8   6   3 2957.43   20.16
   8   6  -3 3029.11   21.63
   8   6  -3 2979.35   19.36
   8   6  -3 2906.59   20.83
   8   6  -3 2893.03   17.53
  10  -4  -5   69.51    3.55
  10   4  -5   60.69    3.75
  10   4  -5   70.76    4.31
 -10   4   5   64.99    3.69
  10   4  -5   62.88    3.86
  11   1   1  665.60    9.55
  11  -1   1  640.39    9.11
  -2   1  -8    7.15    2.82
   2   1   8    9.03    2.66
   2  -1   8    8.99    2.22
  -2  -1  -8    8.17    2.89
   2   1   8    9.54    2.58
  -8   4  -3 1697.89   15.91
  -8   4  -3 1744.20   17.05
   8   4   3 1723.55   14.46
   8   4   3 1728.51   15.95
   9  -1  -8  188.11    4.26
   9  -1  -8  203.71    5.07
   9   1  -8  198.96    5.66
   9  -1  -8  182.73    4.41
   9   1  -8  200.91    5.20
   9  -1  -8  210.65    4.98
   9   1  -8  202.64    6.33
   9   1  -8  185.36    4.24
   4   6  -6 8397.77   35.16
  -4   6   6 8302.56   32.39
  -4   6   6 8242.57   31.33
   4   6  -6 8240.27   32.08
   4   6  -6 8411.76   34.56
   1  -5  -7   86.49    3.18
  -1   5   7  102.85    4.06
  -1   5   7   99.34    3.95
  -1   5   7   86.16    2.97
   1   5  -7  103.96    4.54
   1   5  -7  102.95    4.53
   1   5  -7   94.48    3.86
   4   4   6 1420.00   12.91
  -4   4  -6 1434.06   13.90
  10  -2  -7    2.40    2.20
  10   2  -7    1.14    3.51
  10   2  -7   10.94    2.71
 -10   2   7   12.39    2.46
  10   2  -7    1.94    2.86
  10  -2  -7    3.21    2.45
  -1   8   0   23.99    2.08
   1   8   0   21.52    2.17
  -1   8   0   25.00    2.70
   1   8   0   24.86    2.65
   1   8   0   28.73    2.09
   1   8   0   25.47    3.01
  -1   8   0   25.29    3.11
  -1   8   0   23.77    2.50
  -6   7   1 1399.88   13.10
  -6   7   1 1493.21   12.83
  -6   7   1 1470.78   12.83
   6   7  -1 1422.97   12.86
   6   7  -1 1405.10   12.16
   6   7  -1 1437.72   13.45
   6   7  -2   45.42    3.45
   6   7  -2   49.22    3.83
  -6   7   2   55.23    3.23
  -6   7   2   50.31    2.59
   6   7  -2   49.38    2.81
  -6   7   2   53.06    3.06
   2   1  -9 1077.17   10.67
   2  -1  -9 1074.37   10.76
  -2   1   9 1162.42   11.61
  -2   1   9 1000.13    8.83
   2   1  -9  957.83    9.44
  -2  -1   9 1112.58    9.96
  12   0  -1    1.25    1.99
  -1   6   6 7389.74   30.89
   1   6  -6 7487.09   33.62
   1   6  -6 7416.87   30.71
  -1   6   6 7309.63   30.08
  -1   6   6 7368.96   27.73
  -3   7  -3 1425.23   13.48
   3   7   3 1381.06   14.39
  -3   7  -3 1377.52   14.39
   3   7   3 1373.98   12.71
   3   7   3 1328.96   11.64
  -3   7  -3 1321.18   12.64
  -7   4  -4  283.75    6.76
  -7   4  -4  280.96    6.81
   7   4   4  273.20    6.31
   7   4   4  285.33    6.23
  -1   7  -4 1460.13   13.81
   1   7   4 1514.22   12.17
  -1   7  -4 1527.94   13.30
  -1   7  -4 1532.73   15.04
  -1   7  -4 1445.26   13.20
   1   7   4 1508.34   14.22
   1   7   4 1436.43   13.06
   0   8   1 3992.37   20.73
   0   8  -1 3921.31   22.53
   0   8   1 3945.65   20.34
   0   8   1 3872.14   22.00
   0   8  -1 3991.07   24.78
   0   8   1 3908.39   20.78
   0   8  -1 3968.76   20.34
  -7   5  -3  614.11   10.01
   7   5   3  628.91   10.00
   6  -1  -9  225.71    5.48
   6  -1  -9  217.62    5.88
   6   1  -9  201.60    5.31
   6   1  -9  223.55    6.38
  -6   1   9  229.13    5.42
   6  -1  -9  215.39    5.58
   6   1  -9  215.39    5.55
  -1   8   1   15.20    2.26
  -1   8   1   14.20    2.32
  -1   8   1   15.54    2.32
  -1   8   1   15.73    2.00
   1   8  -1   16.19    2.54
   1   8  -1   14.23    1.80
   3  -4  -8   22.78    2.61
   3   4  -8   19.53    2.22
   3   4  -8   21.84    3.21
  -3   4   8   20.63    2.49
   3   4  -8   19.22    2.19
   3   4  -8   24.04    2.81
   4   4  -8  201.81    6.04
  -4   4   8  194.02    4.82
   4   4  -8  187.37    4.95
   4  -4  -8  189.65    5.10
   4   4  -8  188.38    5.23
  -4   4   8  186.71    4.83
  11   2  -6  213.74    5.70
  11   2  -6  223.31    5.91
 -11   2   6  213.84    5.86
  11  -2  -6  206.75    5.16
  11  -2  -6  219.22    5.81
   8   4  -7 1101.80   13.38
   8   4  -7 1033.07   11.84
   8  -4  -7 1009.01    9.27
   8  -4  -7 1075.17   11.51
   8   4  -7 1023.93    9.83
   8   4  -7 1101.76   12.64
  -8   4   7 1029.31   10.08
  12   0  -5    1.50    2.41
  12   0  -5    0.30    1.47
   4  -2   7 2477.24   16.19
   4   2   7 2514.51   17.87
  11   3  -5   17.41    2.50
  11  -3  -5   16.47    2.55
 -11   3   5   19.85    2.96
  11  -3  -5   17.54    2.96
  11   3  -5   18.10    2.79
  12   2  -3  401.48    6.91
  12   2  -3  439.75    7.28
  12  -2  -3  450.58    7.18
  12   2  -3  431.60    7.79
  12  -2  -3  438.89    6.80
 -12   2   3  415.34    7.14
   2   4   7  436.71    5.63
   2   4   7  428.12    6.34
  -2   4  -7  460.65    7.77
   2   4   7  465.98    6.74
  -2   4  -7  483.69    8.79
   9  -4   2  918.38    9.41
  -9   4  -2  934.49   12.01
   9   4   2  875.08    9.51
   9   4   2  977.52   12.02
  -9   4  -2  975.45   12.73
   9   4   2 1000.63   10.57
  12   1  -1  477.58    8.22
  12   1  -1  467.30    8.00
  12   1  -1  460.74    6.32
  12  -1  -1  454.80    7.32
 -12   1   1  440.11    7.75
  -8   5  -2 1792.52   17.23
  -8   5  -2 1786.04   16.54
   8   5   2 1813.09   16.91
   8   5   2 1844.90   14.95
   1   8   1   32.36    3.02
  -1   8  -1   34.09    2.66
   1   8   1   32.48    2.19
   1   8   1   37.28    2.86
   1   8   1   33.17    2.68
  -1   8  -1   35.89    2.76
  -1   8  -1   38.96    3.35
   4   2  -9    5.65    2.51
   4   2  -9    4.62    2.31
   4  -2  -9    7.78    2.54
   4   2  -9    3.67    2.43
   4  -2  -9    4.80    2.30
  -4   2   9    4.48    2.09
  -6   5  -4   25.74    2.26
   6   5   4   16.61    2.59
   6   5   4   14.62    2.67
  -6   5  -4   20.28    3.06
  -6   5  -4   20.39    2.92
  -2   8   0  240.41    5.49
  -2   8   0  251.68    6.27
   2   8   0  236.42    4.83
   2   8   0  247.32    6.22
   2   8   0  249.47    5.68
  -2   8   0  231.93    5.34
  -2   8   0  221.51    4.22
  -2   8   1  720.33    8.21
  -2   8   1  734.67    9.16
  -2   8   1  698.94    8.93
  -2   8   1  720.31    9.43
   2   4  -8 1272.45   11.83
  -2   4   8 1285.71   11.59
   2  -4  -8 1297.41   12.26
   5  -4  -8  474.89    7.73
   5   4  -8  425.93    7.36
   5   4  -8  436.68    7.51
  -5   4   8  431.81    6.47
  -5   4   8  436.64    7.15
   5   4  -8  466.99    8.59
   1   0  -9    1.48    1.68
   1   0  -9   -0.02    1.68
  -1   0   9    0.40    2.28
  -1   0   9    4.90    2.08
  12  -1  -5  528.71    7.41
 -12   1   5  511.63    8.44
  12  -1  -5  518.11    8.13
  -7   6   5 1607.20   14.07
   7   6  -5 1638.17   14.65
   7   6  -5 1576.18   11.92
  -7   6   5 1553.41   11.41
   7   6  -5 1593.15   13.51
   5   6  -6  591.33    8.68
   5   6  -6  601.33    8.74
   5   6  -6  605.51    8.97
  -5   6   6  586.05    7.35
  -5   6   6  577.07    7.82
   6   7   0  686.31    9.07
   6   7   0  680.08    9.30
   6   7   0  677.94    9.31
  -6   7   0  694.77    9.72
  -6   7   0  711.54    8.80
  -6   7   0  705.54    7.88
 -12   2   2  167.20    4.00
  12  -2  -2  185.62    4.92
  12   2  -2  172.56    4.45
  12   2  -2  194.65    5.55
 -12   2   2  180.52    4.64
  12   2  -2  197.93    5.45
   3   2  -9   26.80    2.66
  -3   2   9   39.89    2.96
   3  -2  -9   36.79    3.03
   3  -2  -9   28.26    2.89
   3   2  -9   28.81    3.02
  -5   7   4  959.04   10.38
  -5   7   4  974.75   10.35
   9   5  -5  560.35    8.61
   9  -5  -5  549.19    7.47
   9   5  -5  567.00    9.13
  -9   5   5  551.35    8.68
   9   5  -5  532.76    8.67
   8  -5  -6 1154.99   10.85
   8   5  -6 1194.99   12.89
   8   5  -6 1221.48   13.05
   8   5  -6 1189.51   12.62
  -8   5   6 1150.61   11.57
   7   0  -9   -0.09    2.19
   7   0  -9    0.11    1.64
   7   0  -9    0.79    2.42
  -6   7   3 1290.14   12.40
  -6   7   3 1304.87   11.48
   5   2  -9  660.38    9.09
   5  -2  -9  668.93    9.19
  -5   2   9  714.53    9.04
   5   2  -9  698.26   10.05
   5   2  -9  655.60    9.06
   5  -2  -9  682.74    9.45
  12   2  -4  730.82    8.92
  12   2  -4  770.35    8.34
  12   2  -4  789.63    9.59
 -12   2   4  763.79    9.90
  12  -2  -4  759.32    9.04
  12   2  -4  794.38    8.72
  12  -2  -4  765.62    9.31
   6   5  -7  574.88    8.08
   6   5  -7  595.36    9.59
   6   5  -7  592.73    8.36
   6  -5  -7  568.39    7.73
   6   5  -7  597.33    8.56
  -6   5   7  588.36    7.36
  -6   5   7  587.96    7.07
   8   6   0  664.45   10.29
  -8   6   0  597.95    8.72
  -8   6   0  608.95    6.96
   8   6   0  627.93    8.58
   8   6   0  650.61    9.71
   8   6   0  665.01    9.08
  -8   6   0  641.63    9.58
  -8   3  -4  200.22    5.01
   8   3   4  196.91    4.85
   8   3   4  195.35    4.91
   8  -3   4  209.59    4.90
   9  -3   3 4607.34   22.65
  -9   3  -3 4501.22   26.60
   9   3   3 4499.24   23.78
  -9   3  -3 4477.85   23.73
   9   3   3 4386.34   20.89
   0   6  -6 1081.70   10.26
   0   6   6 1155.11   10.98
   0   6  -6 1208.30   12.63
   0   6  -6 1144.05   12.77
   0   6   6 1142.30   10.89
   0   6   6 1088.83    9.65
  11   3   0   14.02    2.57
  11  -3   0   13.50    2.28
  11   3   0   20.75    2.97
 -11   3   0   19.78    2.97
   0   5  -7   27.35    2.32
   0   5  -7   28.59    3.14
   0   5   7   21.91    2.49
   0   5   7   23.91    2.49
   0   5  -7   22.55    3.00
   8   6  -4 2648.78   18.66
   8   6  -4 2623.48   17.29
   8   6  -4 2587.09   19.12
   1  -1  -9 2155.31   13.32
  -1  -1   9 2192.07   13.21
   1   1  -9 2178.50   15.24
   1   1  -9 2189.31   13.34
   6   2   6 1025.19   10.59
   6  -2   6 1047.07   10.62
   6   2   6 1035.97   10.98
  -1   8   2  138.49    3.93
  -1   8   2  148.87    4.24
  -1   8   2  144.41    4.31
  -1   8   2  153.35    4.48
  -6   4  -5  125.45    4.53
  -6   4  -5  133.04    4.14
  -6   4  -5  122.10    4.04
  11   2   1 1701.49   14.97
  11   2   1 1597.13   14.00
  11  -2   1 1647.78   13.73
 -11   2  -1 1557.15   15.27
   2   2   8   61.44    3.29
   2   2   8   61.72    3.16
   7   1  -9 1496.61   12.98
   7   1  -9 1481.54   12.64
   7  -1  -9 1458.02   12.72
   7  -1  -9 1533.69   12.64
   7   1  -9 1595.25   14.66
   7  -1  -9 1535.66   13.34
   9   2  -8  464.98    8.83
   9   2  -8  449.53    7.83
   9  -2  -8  458.60    7.21
   0   8   2  221.72    5.00
   0   8   2  230.73    5.22
   0   8  -2  231.07    5.23
   0   8   2  236.07    5.36
   0   8   2  230.61    4.83
  -9   0  -4  634.21    8.68
   9   0   4  715.76    9.47
  -1   3  -8   17.51    2.07
   1   3   8   18.89    1.90
   1   3   8   19.20    2.43
  -1   3  -8   25.48    2.99
  11   0  -7  107.39    4.63
   8   3  -8  191.00    4.50
   8   3  -8  209.90    6.48
   8  -3  -8  191.26    4.50
   8  -3  -8  198.01    5.19
   8   3  -8  196.72    5.63
   8   3  -8  187.30    4.84
   3   5   6 3064.82   17.00
   3   5   6 3023.55   15.12
  -3   5  -6 3041.79   20.20
  -2   8  -1  194.82    5.52
   2   8   1  190.91    4.97
   2   8   1  181.31    4.69
   2   8   1  190.93    5.17
  -2   8  -1  196.43    4.79
  -2   8  -1  185.57    4.44
   2   2  -9  192.75    4.58
   2  -2  -9  208.19    4.87
   2   2  -9  188.16    5.10
  -2   2   9  218.58    5.25
  -2   8   2 2337.85   15.86
  -2   8   2 2350.82   15.45
  11   4  -3   10.55    2.84
 -11   4   3   12.10    2.29
  11  -4  -3   14.53    2.24
  11   4  -3   17.69    2.98
   1  -4  -8 1133.21   10.87
   1   4  -8 1023.74   11.01
   1   4  -8 1049.26    9.52
   1   4  -8 1129.75   11.74
  -1   4   8 1069.04   10.35
  -1   4   8 1075.15   10.00
   6   4  -8 3554.67   20.06
   6   4  -8 3539.64   22.86
   6  -4  -8 3581.14   20.05
 -10   5   2  623.40    7.73
  10  -5  -2  580.93    6.84
  10   5  -2  585.70    7.17
  10   5  -2  609.39    9.52
  10   5  -2  578.95    7.82
  10   5  -2  644.19    9.99
   6  -2  -9   13.14    2.26
   6  -2  -9   17.51    2.70
   6   2  -9   12.69    2.70
   6  -2  -9   15.71    2.53
   6   2  -9   14.01    2.90
  -6   2   9   14.95    2.37
  -3   8   1  544.90    7.79
  -3   8   1  559.07    8.00
   2   7   4  478.25    7.80
  -2   7  -4  442.37    7.35
   2   7   4  478.58    7.28
  -2   7  -4  475.76    7.37
  -2   7  -4  436.36    7.76
  -2   7  -4  507.19    7.68
  -3   6  -5  335.32    6.84
  -3   6  -5  327.13    5.73
   3   6   5  340.69    5.57
  -3   6  -5  363.87    7.16
   3   6   5  349.42    6.28
   3   6   5  355.52    5.69
 -10   5   3 1705.99   13.86
  10   5  -3 1642.81   15.40
  10   5  -3 1731.58   15.63
  10  -5  -3 1659.11   11.96
  10   0   3   -0.84    2.09
  11   4  -2  504.87    7.62
 -11   4   2  488.55    6.50
  11   4  -2  531.53    8.82
  11  -4  -2  517.10    7.21
   2   7  -5  413.56    7.35
  -2   7   5  428.69    6.95
  -2   7   5  441.04    6.72
  -2   7   5  453.09    6.97
   2   7  -5  420.47    6.69
   2   7  -5  416.66    7.54
  -3   8   0 5001.63   25.07
   3   8   0 4809.07   23.65
  -3   8   0 4934.67   23.06
  -3   8   0 4706.41   21.78
   3   8   0 4867.08   20.83
   9   5   1  430.64    6.91
  -9   5  -1  428.92    8.16
   9   5   1  422.13    8.04
  -3   7   5  176.09    4.65
  -3   7   5  165.24    4.11
   3   7  -5  169.71    5.08
  -3   7   5  181.55    4.56
   3   7  -5  177.40    4.99
   7   3   5    0.59    1.91
   7  -3   5    1.58    1.63
  -7   3  -5    1.63    1.67
  -6   6  -3  194.07    5.42
  -6   6  -3  196.02    4.70
   6   6   3  188.31    5.45
  -6   6  -3  183.58    5.45
   9   1   4 1111.52   11.05
   9  -1   4 1114.07   11.42
   5   0   7    0.41    2.04
  -5   0  -7   -0.13    2.44
   5   0   7    2.23    2.41
   5   7   2    6.26    2.09
  -5   7  -2    7.28    2.20
   5   7   2    5.33    2.08
  -5   7  -2    4.96    2.02
  -5   7  -2    6.60    2.69
  11  -1  -7  576.01    7.23
  11   1  -7  568.83    7.44
 -11   1   7  601.92    8.23
  11  -1  -7  585.52    8.00
  11   1  -7  611.84    8.64
 -10   3  -2  584.50    8.52
  10   3   2  571.46    7.68
  10   3   2  590.28    8.74
 -10   3  -2  587.58    9.44
  10  -3   2  580.09    7.83
   8   0   5    0.53    2.15
  12   2  -1    7.46    2.47
  12   2  -1    6.28    2.43
  12  -2  -1    5.75    2.10
 -12   2   1    5.31    2.18
  -7   6  -2 3053.55   16.59
  -7   6  -2 2997.96   19.80
  -7   6  -2 3104.67   21.27
   7   6   2 3148.56   20.88
   1   8   2  397.10    6.76
   1   8   2  404.57    6.53
  -1   8  -2  388.27    5.98
  -1   8  -2  393.47    7.51
   1   8   2  391.24    6.41
  -1   7   5  976.72    9.89
  -1   7   5  978.33    9.84
   1   7  -5  956.12    9.99
  -1   7   5  990.45   10.00
  -5   5  -5    2.81    2.38
  -5   5  -5    5.16    1.98
   5   5   5    8.68    2.10
 -10   4  -1  311.31    6.63
  10   4   1  306.86    5.94
  10   4   1  319.41    6.86
  10   4   1  290.04    4.99
  10  -4   1  304.25    5.33
 -10   4  -1  302.10    6.80
  12   0   012736.30   38.33
  12   0   012643.40   40.84
   6   6  -6  655.57    8.28
   6   6  -6  639.67    8.66
   6   6  -6  640.44    8.85
  -6   6   6  623.88    7.09
 -10   1  -3 4036.15   23.63
  10   1   3 4144.64   20.55
  10  -1   3 4168.35   21.67
  10   1   3 3967.49   19.85
   3   0   8 1474.20   12.59
  -3   0  -8 1411.64   13.82
  10   0  -8 2728.17   16.41
  11   4  -4 1740.00   15.22
  11  -4  -4 1728.06   13.03
  11   4  -4 1769.74   14.80
 -12   2   5 1899.90   15.30
  12  -2  -5 1909.74   13.68
  12   2  -5 1927.37   13.86
  12   2  -5 1863.68   13.52
  12  -2  -5 1958.70   14.56
  -3   8   2 1582.71   12.73
  -3   8   2 1551.76   13.00
   0   0   9    0.29    1.83
   0   0   9    0.21    1.99
   0   0  -9    1.45    1.90
  -4   7  -3   23.02    2.43
   4   7   3   27.33    2.34
  -4   7  -3   29.26    2.65
   4   7   3   25.38    2.95
  -4   7  -3   26.11    2.83
   4   7   3   21.78    2.40
  -5   1  -7    4.27    2.42
   5   1   7    1.47    1.95
  -5  -1  -7    4.14    2.47
   5  -1   7    0.50    1.92
   5   1   7    1.21    2.11
   5  -1   7    2.32    2.08
  10  -3  -7 2459.92   15.31
 -10   3   7 2433.12   15.58
  10  -3  -7 2527.46   16.12
  10   3  -7 2528.96   16.97
  10   3  -7 2496.67   17.55
  10   3  -7 2544.08   18.26
 -10   5   1 1249.96   11.35
  10   5  -1 1266.12   12.90
  10   5  -1 1264.66   10.31
  10   5  -1 1291.99   12.31
 -10   4   6   46.16    2.93
  10  -4  -6   46.89    2.81
  10   4  -6   44.24    3.39
  10  -4  -6   46.19    2.91
  10   4  -6   45.49    3.19
  12   0  -6  635.58    8.39
   6   7   1  135.82    4.16
  -6   7  -1  139.47    4.16
  -6   7  -1  128.60    4.48
   6   7   1  121.90    3.79
   6   7   1  121.53    4.38
  -4   7   5   35.00    2.71
  -4   7   5   33.30    2.19
  -4   7   5   32.51    2.53
   8   1   5 1971.56   14.62
   8  -1   5 1954.39   14.81
  -1   6  -6 1336.37   12.71
   1   6   6 1310.14   10.52
   1   6   6 1315.04   10.81
   8   0  -9    2.16    2.01
   8   0  -9    0.93    1.80
 -10   5   4   -0.09    2.04
  10   5  -4    5.81    2.71
  10   5  -4    1.77    2.59
  10  -5  -4    2.25    1.61
  12   1   0 1053.35   10.92
  12   1   0 1029.74   10.84
  12  -1   0 1023.17   10.13
   7   5  -7  277.46    5.69
   7   5  -7  271.82    5.22
   7   5  -7  278.46    6.36
   7  -5  -7  279.44    5.20
   7   5  -7  262.21    5.64
  -6   7   4  713.01    8.65
  -6   7   4  744.16    8.17
  -1   2   9    1.74    1.79
  -5   6  -4 1746.06   13.41
   5   6   4 1718.09   14.06
  -5   6  -4 1726.70   14.03
   5   6   4 1783.53   13.37
  -5   6  -4 1803.17   14.93
  -7   7   2  859.22    9.05
  -7   7   2  847.43    8.08
   7   7  -2  880.24    9.94
   7   7  -2  872.50    9.92
   3  -1   8 2289.25   15.80
   3   1   8 2223.01   15.36
   3  -1   8 2139.94   13.95
  -3  -1  -8 2197.12   16.72
  -3   1  -8 2143.75   16.40
   3   1   8 2268.26   15.23
  11  -3  -6 2388.44   15.98
  11   3  -6 2447.07   16.29
  11  -3  -6 2371.05   15.61
  11   3  -6 2456.29   17.00
 -11   3   6 2465.32   16.48
  10  -1  -8  312.96    5.27
  10  -1  -8  306.83    5.35
  10   1  -8  312.94    5.82
  10   1  -8  295.21    5.63
  11   4  -1   47.57    3.20
  11  -4  -1   48.69    2.59
  11   4  -1   49.84    3.45
   4   3   7  683.35    8.06
  -4   3  -7  671.37    9.41
   0   1   9  124.28    3.86
   0   1  -9  135.55    4.18
  -1   5  -7 2520.67   17.11
   1   5   7 2542.26   15.21
   1   5   7 2536.57   14.14
   9   4  -7  301.48    6.18
   9   4  -7  295.30    6.74
   9  -4  -7  318.58    5.72
   9   4  -7  316.23    6.48
   7  -2  -9 1316.22   11.57
   7   2  -9 1292.11   12.33
   7   2  -9 1297.69   11.22
   7  -2  -9 1279.35   11.21
   7   7  -1    7.90    2.12
  -7   7   1   12.62    1.82
  -7   7   1    9.42    1.68
   0   7   5  640.37    7.86
   0   7   5  630.48    7.76
   0   7   5  634.68    7.37
   0   7  -5  633.34    8.02
  -3   8  -1 2225.46   15.01
   3   8   1 2290.32   15.32
  -3   8  -1 2122.44   15.85
   3   8   1 2102.52   14.06
  11   0   2  243.26    5.12
  12   3  -3  994.49   10.43
  12   3  -3  993.43   10.88
  12  -3  -3  935.30    8.96
  12  -3  -3 1044.95   10.08
 -12   3   3  938.39    9.22
 -12   1   6   -0.18    2.14
  12   1  -6    2.81    2.10
  12  -1  -6    3.23    1.65
  12  -1  -6    4.25    2.31
  -9   6   2 5845.62   23.21
   9   6  -2 5965.58   28.34
   9   6  -2 5927.59   27.29
   9   6  -2 5828.08   24.59
   0   4  -8  335.75    6.26
   0   4   8  344.68    5.49
   0   4  -8  346.35    6.12
   7  -4  -8    5.57    2.10
   7   4  -8    7.96    2.09
   7   4  -8    7.51    2.25
   7   4  -8    6.39    3.00
   8  -1  -9 1380.51   11.06
   8  -1  -9 1354.96   10.67
   8   1  -9 1359.05   10.74
   8   1  -9 1351.39   12.51
  -8   6  -1   10.17    2.60
   8   6   1   12.99    2.23
  -8   6  -1    8.83    2.22
   8   6   1   10.14    2.58
  -4   8   1   20.95    2.27
  -4   8   1   15.89    2.20
   4   3  -9  223.01    5.03
   4   3  -9  246.19    5.44
   4  -3  -9  228.52    5.08
   4   3  -9  224.19    5.04
  -4   3   9  235.59    4.94
   4  -3  -9  250.84    5.24
  -1   8   3  447.32    6.10
  -1   8   3  466.63    6.44
  -1   8   3  473.46    6.79
  -1   8   3  458.93    6.45
   3   4   7  902.32    8.67
  -3   4  -7  936.81    9.32
  -2   8  -2  353.12    6.60
   2   8   2  355.63    6.06
  -2   8   3    3.05    1.69
  -2   8   3    2.58    1.82
  -9   6   3   98.49    3.60
   9   6  -3   95.81    4.29
   9   6  -3   96.63    4.27
  12   3  -2 1005.47   10.87
  12  -3  -2 1007.47    9.62
  12   3  -2  982.76   10.02
   5   4   6  240.42    4.89
  -5   4  -6  232.81    4.88
  -8   6   5   14.45    2.22
   8   6  -5   15.37    2.56
  -3   3   9  173.36    4.26
   3  -3  -9  174.49    4.57
   3   3  -9  163.38    4.20
   3  -3  -9  166.03    4.26
  -7   7   3  334.85    5.84
  -5   3   9  456.38    6.73
   5   3  -9  463.99    7.32
   5  -3  -9  459.97    6.88
   5   3  -9  442.44    6.95
   5  -3  -9  479.71    7.16
   5   3  -9  442.02    7.01
  -9   2  -4  354.99    6.41
   9  -2   4  350.26    6.03
  11   1   2 1773.88   13.07
 -11   1  -2 1751.27   14.85
  12  -3  -4 1624.73   12.35
  12   3  -4 1592.01   12.75
  12  -3  -4 1611.62   11.96
 -12   3   4 1573.39   12.82
  11   2  -7 3192.33   18.37
  11  -2  -7 3122.86   17.28
 -11   2   7 3144.27   17.56
  11  -2  -7 3170.24   16.88
  -4   8   0  728.34    8.51
   4   8   0  729.66    8.74
   0   8  -3 1793.35   13.92
   0   8   3 1815.21   13.13
  -4   8   2  182.43    4.45
  -4   8   2  167.64    4.35
   7   0   6  294.49    5.82
   9   6  -1  743.59    9.81
   9   6  -1  738.02    8.72
   9   6  -1  731.12    8.39
  -5   7   5   41.84    2.44
   9   5  -6  184.88    4.84
   9   5  -6  192.26    5.00
  -3   7  -4 1442.37   11.67
  -3   7  -4 1428.07   11.75
  -3   7  -4 1482.31   11.94
   3   7   4 1483.29   12.37
  -3   7  -4 1570.13   12.36
   3   7   4 1521.60   11.18
   6   3   6  109.37    3.52
  10  -2   3  361.32    5.99
 -10   2  -3  352.22    6.90
  -3   8   3    1.63    1.92
  -3   8   3    1.99    1.72
  11  -4  -5  703.40    8.47
  11  -4  -5  699.79    7.78
 -11   4   5  710.76    8.59
  11   4  -5  721.26    9.20
 -11   3  -1  530.79    7.54
 -11   3  -1  557.11    8.30
  11   3   1  540.27    7.31
  11  -3   1  527.34    6.97
  11   3   1  533.03    7.79
  -2   3  -8  259.35    5.87
   2   3   8  237.48    4.70
   9   3  -8  399.68    6.21
   9   3  -8  421.34    6.96
   9   3  -8  422.11    7.67
   7   7   0  172.67    4.42
   5   2   7   17.79    2.08
   5   2   7   15.44    2.10
  -5   2  -7   12.04    2.39
  -2   3   9    4.44    1.80
   2  -3  -9    5.52    2.07
   7   6  -6 5421.43   23.76
   8  -2   5  174.41    4.25
   7  -1   6  360.65    6.03
   7   1   6  358.10    6.00
   7   1   6  341.96    5.16
 -13   0   4  822.15    8.85
  10   5   0   36.47    2.90
 -10   5   0   28.04    2.69
  12   2   0  634.18    8.11
 -12   2   0  621.88    8.34
   6   3  -9 1679.48   13.32
   6  -3  -9 1696.64   12.70
   6   3  -9 1649.87   12.32
   6  -3  -9 1683.42   12.72
   1   7   5 2826.93   15.60
  -1   7  -5 2709.16   17.38
   3   2   8   27.47    2.11
  -3  -2  -8   26.53    2.78
  -3   2  -8   31.52    2.83
   3  -2   8   28.58    2.56
   3   2   8   25.75    2.33
  10   2  -8 1358.55   11.66
  10  -2  -8 1359.06   10.66
   0   2   9   71.47    3.00
  10   5  -5 2164.49   15.45
 -10   5   5 2103.94   14.28
   8   5   3 1677.84   12.17
  -8   5  -3 1676.23   13.14
  -8   5  -3 1669.03   13.66
  -9   6   4 1979.49   13.60
   9   6  -4 2004.79   14.56
  -4   6  -5   18.44    2.41
  -3   6   7   50.30    2.61
   3   6  -7   49.29    3.13
  -3   6   7   41.54    2.51
   3   6  -7   43.54    2.71
  -1   8  -3   20.51    2.44
   1   8   3   23.58    2.35
   1   8   3   25.90    2.17
  -4   5  -6  300.78    5.54
  12  -2  -6 1257.89    9.93
  12  -2  -6 1256.81   10.69
 -12   2   6 1231.49   11.08
   8   4   4 1098.07    9.41
  12  -3  -1  573.91    6.99
  12   3  -1  561.07    7.59
  -9   4  -3 1418.88   12.52
  -2   6  -6 2212.31   14.95
  -2   6  -6 2223.00   15.32
   8  -2  -9  403.55    6.03
   8   2  -9  393.74    6.59
  -7   5  -4 5094.86   23.46
   7   5   4 5224.17   22.45
   4   6  -7  804.76    8.60
  -4   6   7  797.58    7.92
  11   4   0 1235.25   11.46
  -2   6   7 1216.54    9.86
   2   6  -7 1285.00   11.61
  -3   5   8 1126.65    9.57
  -3   5   8 1124.48    9.62
   4   5  -8  168.83    4.15
  -4   5   8  176.40    4.03
   4   5  -8  175.04    4.81
   8   5  -7  320.69    5.63
  12  -3  -5 2016.62   12.73
  12  -3  -5 2004.87   13.24
  -4   8  -1  186.77    4.40
   4   8   1  182.38    4.30
  -3   8  -2  632.69    7.98
   3   8   2  643.49    7.66
  -4   8   3 5018.32   21.00
  -4   8   3 5092.24   20.95
  -7   7   4  242.54    4.67
 -11   2  -2 3440.17   19.79
  11  -2   2 3373.93   17.19
   8   4  -8  855.10   10.11
   6   7   2 2210.50   14.87
  -6   7  -2 2215.40   14.84
  -2   5  -7 6741.22   26.86
  -9   5  -2   26.42    2.48
  -9   5  -2   32.64    2.81
  12   0   1    1.48    1.81
 -12   0  -1   -0.12    2.07
;

_shelx_hkl_checksum   83399

#==============================================================================
#     End of CIF
#==============================================================================
